# Supplementary material for: CD146-assisted isolation and multi-omics characterisation of human pluripotent stem cell derived cranial Schwann cell precursor-like cells.
Source: Research Square preprint supplement (doi:10.21203/rs.3.rs-3324198/v1), 2023-09-19
Supplement: Supplementary file 1 [file 087ba231c19d91c8e86fa39d.xlsx]

## Sheet: Sheet1
scRNA Fold Change
ENSEMBL	Symbol	Description	Chromosome	logFC	logCPM	Adj.Pvalue
ENSG00000043355	ZIC2	Zic family member 2	chr13	-5.64748	8.0321	8.34e-273
ENSG00000128710	HOXD10	homeobox D10	chr2	-5.21841	8.16611	3.36e-234
ENSG00000152977	ZIC1	Zic family member 1	chr3	-5.81933	7.61875	5.14e-216
ENSG00000140937	CDH11	cadherin 11	chr16	-5.54766	7.61115	1.24e-190
ENSG00000065361	ERBB3	erb-b2 receptor tyrosine kinase 3	chr12	3.26848	9.16797	1.26e-117
ENSG00000139800	ZIC5	Zic family member 5	chr13	-4.69215	7.07706	1.4e-112
ENSG00000048740	CELF2	CUGBP Elav-like family member 2	chr10	3.69951	8.79071	1.07e-111
ENSG00000275215	LOC100008587	RNA, 5.8S ribosomal	NA	-3.51629	8.13902	1.42e-103
ENSG00000159167	STC1	stanniocalcin 1	chr8	-4.94673	7.12036	2.07e-98
ENSG00000137571	SLCO5A1	solute carrier organic anion transporter family member 5A1	chr8	-3.49571	10.5553	9.73e-94
ENSG00000150244	TRIM48	tripartite motif containing 48	chr11	7.08138	9.16783	1.49e-93
ENSG00000104722	NEFM	neurofilament medium	chr8	-4.81906	7.5597	2.71e-92
ENSG00000079931	MOXD1	monooxygenase DBH like 1	chr6	4.35976	8.30277	2.95e-87
ENSG00000151892	GFRA1	GDNF family receptor alpha 1	chr10	4.48456	8.28686	4.68e-86
ENSG00000079215	SLC1A3	solute carrier family 1 member 3	chr5	-3.89099	7.61704	8.22e-82
ENSG00000138061	CYP1B1	cytochrome P450 family 1 subfamily B member 1	chr2	-5.19061	8.26199	1.12e-78
ENSG00000158887	MPZ	myelin protein zero	chr1	4.65039	7.69237	1.23e-76
ENSG00000137460	FHDC1	FH2 domain containing 1	chr4	4.55078	7.85524	2.1e-76
ENSG00000128713	HOXD11	homeobox D11	chr2	-4.07024	7.1628	1.32e-75
ENSG00000137573	SULF1	sulfatase 1	chr8	-3.69487	7.80579	4.04e-75
ENSG00000182985	CADM1	cell adhesion molecule 1	chr11	2.67151	9.38081	4.56e-68
ENSG00000163359	COL6A3	collagen type VI alpha 3 chain	chr2	-4.06182	7.0833	2.15e-67
ENSG00000130707	ASS1	argininosuccinate synthase 1	chr9	-3.95486	7.13281	2.72e-67
ENSG00000128709	HOXD9	homeobox D9	chr2	-3.85111	7.06828	2.13e-66
ENSG00000188042	ARL4C	ADP ribosylation factor like GTPase 4C	chr2	-3.59133	7.29789	1.26e-64
ENSG00000120875	DUSP4	dual specificity phosphatase 4	chr8	3.75201	8.407	3.65e-63
ENSG00000174963	ZIC4	Zic family member 4	chr3	-3.91363	6.83043	1.65e-62
ENSG00000104332	SFRP1	secreted frizzled related protein 1	chr8	3.07511	9.03727	4.55e-62
ENSG00000076706	MIR6756	microRNA 6756	NA	4.50504	7.60167	6.88e-59
ENSG00000106546	AHR	aryl hydrocarbon receptor	chr7	4.98507	7.89493	7.67e-59
ENSG00000136160	EDNRB	endothelin receptor type B	chr13	3.9159	7.82888	1.56e-58
ENSG00000147257	GPC3	glypican 3	chrX	-3.41289	7.50458	3.19e-58
ENSG00000163520	FBLN2	fibulin 2	chr3	-3.56815	7.10768	2.12e-57
ENSG00000116039	ATP6V1B1	ATPase H+ transporting V1 subunit B1	chr2	-4.13865	7.00245	4.7e-56
ENSG00000007237	GAS7	growth arrest specific 7	chr17	3.11097	8.45987	1.03e-55
ENSG00000115844	DLX2	distal-less homeobox 2	chr2	4.70898	7.75734	1.41e-55
ENSG00000173208	ABCD2	ATP binding cassette subfamily D member 2	chr12	-4.15081	6.8705	4.01e-53
ENSG00000064300	NGFR	nerve growth factor receptor	chr17	2.77596	9.20138	6.9e-53
ENSG00000106278	PTPRZ1	protein tyrosine phosphatase, receptor type Z1	chr7	3.31225	8.14217	7.73e-52
ENSG00000143013	LMO4	LIM domain only 4	chr1	2.58143	8.97066	9.94e-52
ENSG00000171956	FOXB1	forkhead box B1	chr15	-3.91886	6.8496	3.15e-49
ENSG00000144355	DLX1	distal-less homeobox 1	chr2	4.32547	7.76087	4.74e-49
ENSG00000224189	HAGLR	HOXD antisense growth-associated long non-coding RNA	NA	-3.39875	6.69683	2.38e-48
ENSG00000078053	AMPH	amphiphysin	chr7	-3.39836	6.98449	1.01e-46
ENSG00000132854	KANK4	KN motif and ankyrin repeat domains 4	chr1	3.83884	7.61199	1.73e-46
ENSG00000145794	MEGF10	multiple EGF like domains 10	chr5	3.29475	7.85619	3.35e-45
ENSG00000170542	SERPINB9	serpin family B member 9	chr6	4.38431	7.40095	6.3e-45
ENSG00000106484	MEST	mesoderm specific transcript	chr7	-2.64437	7.86894	1.23e-44
ENSG00000143171	RXRG	retinoid X receptor gamma	chr1	4.00395	7.25891	1.63e-44
ENSG00000164161	HHIP	hedgehog interacting protein	chr4	-3.35978	7.21197	5.83e-42
ENSG00000113389	NPR3	natriuretic peptide receptor 3	chr5	4.16231	7.48903	1.41e-41
ENSG00000171617	ENC1	ectodermal-neural cortex 1	chr5	2.99642	8.44405	2.5e-41
ENSG00000116106	EPHA4	EPH receptor A4	chr2	-3.61561	6.79231	4.57e-41
ENSG00000075213	SEMA3A	semaphorin 3A	chr7	-3.22284	7.17496	1.09e-40
ENSG00000182175	RGMA	repulsive guidance molecule family member a	chr15	-3.04124	7.22206	2.27e-40
ENSG00000184486	POU3F2	POU class 3 homeobox 2	chr6	-3.59444	6.95562	2.49e-40
ENSG00000164692	COL1A2	collagen type I alpha 2 chain	chr7	-3.8203	8.31785	5.81e-40
ENSG00000226258	GRM7-AS3	GRM7 antisense RNA 3	NA	-4.21325	7.01505	2.59e-39
ENSG00000189120	SP6	Sp6 transcription factor	chr17	-3.66397	6.80232	3.25e-39
ENSG00000148848	ADAM12	ADAM metallopeptidase domain 12	chr10	3.49175	7.96348	5.82e-39
ENSG00000096696	DSP	desmoplakin	chr6	-3.01612	7.58026	9.4e-39
ENSG00000118733	OLFM3	olfactomedin 3	chr1	-3.44415	6.7449	7.66e-37
ENSG00000074416	MGLL	monoglyceride lipase	chr3	3.52232	7.40766	1.5e-36
ENSG00000198598	MMP17	matrix metallopeptidase 17	chr12	3.69936	7.26033	9.16e-36
ENSG00000140807	NKD1	naked cuticle homolog 1	chr16	-2.66228	8.07483	1.68e-35
ENSG00000169851	PCDH7	protocadherin 7	chr4	-2.88983	7.73607	2.63e-35
ENSG00000139174	PRICKLE1	prickle planar cell polarity protein 1	chr12	-3.30132	6.84385	3.22e-35
ENSG00000066468	FGFR2	fibroblast growth factor receptor 2	chr10	-3.08403	6.96315	3.61e-35
ENSG00000149948	HMGA2	high mobility group AT-hook 2	chr12	2.05382	9.85279	3.94e-35
ENSG00000123560	PLP1	proteolipid protein 1	chrX	2.31314	8.96749	4.23e-35
ENSG00000176771	NCKAP5	NCK associated protein 5	chr2	-3.45591	6.90326	4.29e-35
ENSG00000128652	HOXD3	homeobox D3	chr2	-3.064	6.73658	3.02e-34
ENSG00000168542	MIR3606	microRNA 3606	NA	-3.6761	7.22312	3.86e-34
ENSG00000184613	NELL2	neural EGFL like 2	chr12	-3.11025	6.90333	4.24e-34
ENSG00000160307	S100B	S100 calcium binding protein B	chr21	3.46611	7.35708	6.43e-34
ENSG00000114279	FGF12	fibroblast growth factor 12	chr3	-3.66961	6.82229	2.38e-33
ENSG00000113361	CDH6	cadherin 6	chr5	3.07819	7.97524	4.81e-33
ENSG00000115461	IGFBP5	insulin like growth factor binding protein 5	chr2	-3.16884	8.53944	6.7e-33
ENSG00000277586	NEFL	neurofilament light	chr8	-3.11603	7.20158	1.85e-32
ENSG00000152092	ASTN1	astrotactin 1	chr1	-3.15334	6.88381	2.1e-32
ENSG00000081479	LRP2	LDL receptor related protein 2	chr2	3.61591	7.36324	3.47e-32
ENSG00000071991	CDH19	cadherin 19	chr18	3.93245	7.1862	3.57e-32
ENSG00000156925	ZIC3	Zic family member 3	chrX	-3.03291	6.95042	7.12e-32
ENSG00000177508	IRX3	iroquois homeobox 3	chr16	-3.42453	6.88664	2.24e-31
ENSG00000128849	CGNL1	cingulin like 1	chr15	-3.16254	6.81029	3.77e-31
ENSG00000256463	SALL3	spalt like transcription factor 3	chr18	-3.19752	6.68942	5.45e-31
ENSG00000179820	MYADM	myeloid associated differentiation marker	chr19	-3.05324	6.77593	1.97e-30
ENSG00000185112	FAM43A	family with sequence similarity 43 member A	chr3	-3.04769	6.70214	1.99e-30
ENSG00000148204	CRB2	crumbs 2, cell polarity complex component	chr9	-3.16017	6.8362	2.3e-30
ENSG00000164125	FAM198B	family with sequence similarity 198 member B	chr4	3.81079	7.16609	2.11e-29
ENSG00000064309	CDON	cell adhesion associated, oncogene regulated	chr11	-2.76877	7.34835	2.22e-29
ENSG00000145147	SLIT2	slit guidance ligand 2	chr4	-3.07102	7.18799	3.49e-29
ENSG00000128645	MIR7704	microRNA 7704	NA	-3.04027	6.65575	5.95e-29
ENSG00000075223	SEMA3C	semaphorin 3C	chr7	2.6402	8.197	7.74e-29
ENSG00000183287	CCBE1	collagen and calcium binding EGF domains 1	chr18	-3.24612	6.83193	1.1e-28
ENSG00000076641	PAG1	phosphoprotein membrane anchor with glycosphingolipid microdomains 1	chr8	3.14531	7.79546	1.28e-28
ENSG00000276644	DACH1	dachshund family transcription factor 1	chr13	-3.15571	7.1641	5.61e-28
ENSG00000175183	CSRP2	cysteine and glycine rich protein 2	chr12	-2.90828	6.75995	1.01e-27
ENSG00000170166	HOXD4	homeobox D4	chr2	-2.86576	6.70158	2.56e-27
ENSG00000196569	LAMA2	laminin subunit alpha 2	chr6	-3.36473	6.94814	6.36e-27
ENSG00000134323	MYCN	MYCN proto-oncogene, bHLH transcription factor	chr2	2.43886	9.19132	7.92e-27
ENSG00000137267	TUBB2A	tubulin beta 2A class IIa	chr6	-2.01812	8.42486	7.92e-27
ENSG00000198797	BRINP2	BMP/retinoic acid inducible neural specific 2	chr1	-2.92104	6.63033	5.48e-26
ENSG00000118322	ATP10B	ATPase phospholipid transporting 10B (putative)	chr5	3.51582	6.9999	7.08e-26
ENSG00000182968	SOX1	SRY-box 1	chr13	-2.92572	6.65895	8.32e-26
ENSG00000137473	TTC29	tetratricopeptide repeat domain 29	chr4	-2.82275	6.63186	1.16e-25
ENSG00000018625	ATP1A2	ATPase Na+/K+ transporting subunit alpha 2	chr1	-1.99904	9.12088	1.43e-25
ENSG00000184160	ADRA2C	adrenoceptor alpha 2C	chr4	-3.12519	7.23712	2.43e-25
ENSG00000154639	CXADR	coxsackie virus and adenovirus receptor	chr21	-2.68008	7.32846	5.84e-25
ENSG00000153707	PTPRD	protein tyrosine phosphatase, receptor type D	chr9	-2.38016	7.39615	8.01e-25
ENSG00000117318	ID3	inhibitor of DNA binding 3, HLH protein	chr1	-2.85382	6.96478	3.29e-24
ENSG00000166250	CLMP	CXADR like membrane protein	chr11	-2.64255	7.02586	4.29e-24
ENSG00000205035	LOC440040	glutamate metabotropic receptor 5 pseudogene	chr11	3.7658	7.05577	8.73e-24
ENSG00000153902	LGI4	leucine rich repeat LGI family member 4	chr19	3.3473	6.99484	1.07e-23
ENSG00000141639	MAPK4	mitogen-activated protein kinase 4	chr18	-2.77436	7.11019	2.08e-23
ENSG00000174607	UGT8	UDP glycosyltransferase 8	chr4	-2.25524	7.76691	2.3e-23
ENSG00000105894	PTN	pleiotrophin	chr7	2.02626	9.14252	2.94e-23
ENSG00000181234	TMEM132C	transmembrane protein 132C	chr12	-2.43947	7.2353	1.59e-22
ENSG00000092607	TBX15	T-box 15	chr1	-3.00013	6.64719	1.99e-22
ENSG00000143850	PLEKHA6	pleckstrin homology domain containing A6	chr1	-2.59969	6.59802	2.15e-22
ENSG00000171451	DSEL	dermatan sulfate epimerase-like	chr18	-2.66807	6.7414	2.38e-22
ENSG00000182256	GABRG3	gamma-aminobutyric acid type A receptor gamma3 subunit	chr15	-2.93965	6.7398	3.99e-22
ENSG00000114251	WNT5A	Wnt family member 5A	chr3	-2.86535	6.80022	5.78e-22
ENSG00000131711	MAP1B	microtubule associated protein 1B	chr5	-1.90068	9.47138	1.38e-21
ENSG00000223417	TRIM49D1	tripartite motif containing 49D1	NA	3.53431	6.97474	2.02e-21
ENSG00000172201	ID4	inhibitor of DNA binding 4, HLH protein	chr6	2.99249	7.52947	5.29e-21
ENSG00000120885	MIR6843	microRNA 6843	NA	-2.60161	6.7893	5.49e-21
ENSG00000172575	RASGRP1	RAS guanyl releasing protein 1	chr15	-2.71908	6.70497	7.48e-21
ENSG00000106333	PCOLCE	procollagen C-endopeptidase enhancer	chr7	-2.78616	7.24865	2.36e-20
ENSG00000077279	DCX	doublecortin	chrX	3.18052	7.07617	2.56e-20
ENSG00000143195	ILDR2	immunoglobulin like domain containing receptor 2	chr1	-2.79381	6.78037	3.9e-20
ENSG00000100767	PAPLN	papilin, proteoglycan like sulfated glycoprotein	chr14	-2.78974	6.68631	3.9e-20
ENSG00000188487	INSC	inscuteable homolog (Drosophila)	chr11	2.99072	6.8402	6.29e-20
ENSG00000149256	TENM4	teneurin transmembrane protein 4	chr11	-2.58829	6.71582	8.12e-20
ENSG00000041515	MYO16	myosin XVI	chr13	-2.44736	6.58603	8.23e-20
ENSG00000162545	CAMK2N1	calcium/calmodulin dependent protein kinase II inhibitor 1	chr1	2.88136	7.3618	1.35e-19
ENSG00000233780	LINC00367	long intergenic non-protein coding RNA 367	NA	-2.23077	6.91035	1.66e-19
ENSG00000175274	TP53I11	tumor protein p53 inducible protein 11	chr11	2.14793	8.43098	1.99e-19
ENSG00000176842	IRX5	iroquois homeobox 5	chr16	-2.67774	6.61526	2.83e-19
ENSG00000125046	SSUH2	ssu-2 homolog (C. elegans)	chr3	3.37868	6.97339	2.85e-19
ENSG00000165912	PACSIN3	protein kinase C and casein kinase substrate in neurons 3	chr11	2.7251	6.97815	3.83e-19
ENSG00000102996	MMP15	matrix metallopeptidase 15	chr16	2.81278	6.85166	4.08e-19
ENSG00000162522	KIAA1522	KIAA1522	chr1	-2.41854	7.00994	7.38e-19
ENSG00000144857	BOC	BOC cell adhesion associated, oncogene regulated	chr3	-2.67352	6.79174	9.89e-19
ENSG00000213694	S1PR3	sphingosine-1-phosphate receptor 3	chr9	-2.75597	6.83529	1.16e-18
ENSG00000225783	MIAT	myocardial infarction associated transcript (non-protein coding)	NA	-2.68248	6.63449	1.17e-18
ENSG00000091409	ITGA6	integrin subunit alpha 6	chr2	2.37063	7.74631	1.3e-18
ENSG00000128872	TMOD2	tropomodulin 2	chr15	2.90175	6.97824	1.56e-18
ENSG00000129757	CDKN1C	cyclin dependent kinase inhibitor 1C	chr11	-2.29103	7.83753	2.05e-18
ENSG00000144724	PTPRG	protein tyrosine phosphatase, receptor type G	chr3	-2.1885	7.29619	2.24e-18
ENSG00000197747	S100A10	S100 calcium binding protein A10	chr1	2.42791	7.35258	2.24e-18
ENSG00000112319	EYA4	EYA transcriptional coactivator and phosphatase 4	chr6	-2.78219	6.90464	2.5e-18
ENSG00000185551	MIR1469	microRNA 1469	NA	1.83405	9.24588	4.28e-18
ENSG00000146648	EGFR	epidermal growth factor receptor	chr7	-2.4077	6.59729	4.96e-18
ENSG00000138434	SSFA2	sperm specific antigen 2	chr2	2.09806	8.27238	5.14e-18
ENSG00000012171	MIR6872	microRNA 6872	NA	-2.59004	6.66065	5.37e-18
ENSG00000169439	SDC2	syndecan 2	chr8	-2.30121	7.43197	6.56e-18
ENSG00000233101	HOXB-AS3	HOXB cluster antisense RNA 3	chr17	-2.64257	6.71548	9.01e-18
ENSG00000276203	ANKRD20A3	ankyrin repeat domain 20 family member A3	chr9	2.81048	7.41791	2.24e-17
ENSG00000148426	PROSER2	proline and serine rich 2	chr10	3.00344	6.94545	2.61e-17
ENSG00000186564	FOXD2	forkhead box D2	chr1	2.89896	6.81493	2.69e-17
ENSG00000168843	FSTL5	follistatin like 5	chr4	2.92826	6.85933	3.96e-17
ENSG00000103449	SALL1	spalt like transcription factor 1	chr16	-2.61029	6.7894	5.66e-17
ENSG00000054690	PLEKHH1	pleckstrin homology, MyTH4 and FERM domain containing H1	chr14	2.76257	7.19541	6.88e-17
ENSG00000230876	LINC00486	long intergenic non-protein coding RNA 486	chr2	2.17619	10.2803	1.11e-16
ENSG00000111961	SASH1	SAM and SH3 domain containing 1	chr6	1.92281	8.58683	1.16e-16
ENSG00000233802	TRIM49D2	tripartite motif containing 49D2	chr11	3.12015	6.84806	1.44e-16
ENSG00000105974	CAV1	caveolin 1	chr7	3.26872	7.12686	1.94e-16
ENSG00000101144	BMP7	bone morphogenetic protein 7	chr20	-2.35079	7.72457	3.56e-16
ENSG00000196876	SCN8A	sodium voltage-gated channel alpha subunit 8	chr12	-2.23858	7.28376	3.73e-16
ENSG00000245526	MIR9-2	microRNA 9-2	NA	2.86265	6.80253	9.1e-16
ENSG00000185070	FLRT2	fibronectin leucine rich transmembrane protein 2	chr14	-2.52142	6.75391	9.1e-16
ENSG00000140287	HDC	histidine decarboxylase	chr15	-2.41503	6.61541	1.43e-15
ENSG00000112414	ADGRG6	adhesion G protein-coupled receptor G6	chr6	2.01727	8.19175	1.8e-15
ENSG00000112175	BMP5	bone morphogenetic protein 5	chr6	-2.35994	6.92821	2.88e-15
ENSG00000066382	MPPED2	metallophosphoesterase domain containing 2	chr11	-2.43358	6.74331	4.9e-15
ENSG00000046653	GPM6B	glycoprotein M6B	chrX	2.13624	7.8116	1.08e-14
ENSG00000165323	FAT3	FAT atypical cadherin 3	chr11	-2.52349	6.677	1.77e-14
ENSG00000138119	MYOF	myoferlin	chr10	-2.40877	6.73748	1.98e-14
ENSG00000240694	PNMA2	paraneoplastic Ma antigen 2	chr8	-2.48523	6.68378	2.18e-14
ENSG00000122574	WIPF3	WAS/WASL interacting protein family member 3	chr7	2.66216	6.85849	3.66e-14
ENSG00000079739	PGM1	phosphoglucomutase 1	chr1	-1.9391	7.36853	5.28e-14
ENSG00000259417	LINC01314	long intergenic non-protein coding RNA 1314	NA	2.66877	6.73458	8.18e-14
ENSG00000136960	ENPP2	ectonucleotide pyrophosphatase/phosphodiesterase 2	chr8	2.158	7.64007	8.37e-14
ENSG00000169554	ZEB2	zinc finger E-box binding homeobox 2	chr2	1.8629	9.18435	8.67e-14
ENSG00000010319	SEMA3G	semaphorin 3G	chr3	2.48073	6.70006	1.07e-13
ENSG00000154928	EPHB1	EPH receptor B1	chr3	-2.41571	6.78365	1.14e-13
ENSG00000134954	ETS1	ETS proto-oncogene 1, transcription factor	chr11	2.1	7.8779	1.15e-13
ENSG00000184564	SLITRK6	SLIT and NTRK like family member 6	chr13	2.83633	7.7383	1.94e-13
ENSG00000135046	ANXA1	annexin A1	chr9	-2.45567	6.68017	1.94e-13
ENSG00000180914	OXTR	oxytocin receptor	chr3	2.87812	6.8792	2.12e-13
ENSG00000183148	ANKRD20A2	ankyrin repeat domain 20 family member A2	NA	2.6331	7.198	2.24e-13
ENSG00000165029	ABCA1	ATP binding cassette subfamily A member 1	chr9	-2.68439	6.79481	2.55e-13
ENSG00000144485	HES6	hes family bHLH transcription factor 6	chr2	1.95986	7.98577	4.23e-13
ENSG00000256618	MTRNR2L1	MT-RNR2-like 1	chr17	1.98155	7.99966	4.46e-13
ENSG00000146013	GFRA3	GDNF family receptor alpha 3	chr5	2.44833	7.12565	4.93e-13
ENSG00000152377	SPOCK1	SPARC/osteonectin, cwcv and kazal like domains proteoglycan 1	chr5	-2.3028	6.64401	5.12e-13
ENSG00000260691	ANKRD20A1	ankyrin repeat domain 20 family member A1	NA	2.59679	7.19528	5.88e-13
ENSG00000115232	ITGA4	integrin subunit alpha 4	chr2	2.2246	7.3078	6.46e-13
ENSG00000115738	ID2	inhibitor of DNA binding 2, HLH protein	chr2	-2.65989	6.89739	6.66e-13
ENSG00000197565	COL4A6	collagen type IV alpha 6 chain	chrX	-2.36099	6.89785	6.91e-13
ENSG00000164626	KCNK5	potassium two pore domain channel subfamily K member 5	chr6	2.46657	7.02532	7.23e-13
ENSG00000164199	ADGRV1	adhesion G protein-coupled receptor V1	chr5	-2.03092	7.35673	1.08e-12
ENSG00000154096	THY1	Thy-1 cell surface antigen	chr11	2.18071	7.74853	1.37e-12
ENSG00000128045	RASL11B	RAS like family 11 member B	chr4	-2.47375	7.01983	2.02e-12
ENSG00000125378	BMP4	bone morphogenetic protein 4	chr14	-2.12445	6.56877	2.28e-12
ENSG00000104967	NOVA2	NOVA alternative splicing regulator 2	chr19	-2.24892	6.61767	2.81e-12
ENSG00000171208	NETO2	neuropilin and tolloid like 2	chr16	2.08492	7.78443	3.01e-12
ENSG00000133110	POSTN	periostin	chr13	2.86912	6.901	3.32e-12
ENSG00000172014	ANKRD20A4	ankyrin repeat domain 20 family member A4	chr9	2.50057	7.24166	5.43e-12
ENSG00000145934	TENM2	teneurin transmembrane protein 2	chr5	-2.23697	6.6655	8.04e-12
ENSG00000182103	FAM181B	family with sequence similarity 181 member B	chr11	2.20497	6.65083	9.36e-12
ENSG00000120675	DNAJC15	DnaJ heat shock protein family (Hsp40) member C15	chr13	-2.11277	6.60624	1.05e-11
ENSG00000164418	GRIK2	glutamate ionotropic receptor kainate type subunit 2	chr6	2.56294	7.06849	1.33e-11
ENSG00000111962	UST	uronyl 2-sulfotransferase	chr6	-2.15589	7.01825	1.35e-11
ENSG00000167992	VWCE	von Willebrand factor C and EGF domains	chr11	2.36737	7.0228	1.44e-11
ENSG00000157168	NRG1	neuregulin 1	chr8	-2.23256	6.6275	1.48e-11
ENSG00000175879	HOXD8	homeobox D8	chr2	-2.20108	6.84367	1.63e-11
ENSG00000198771	RCSD1	RCSD domain containing 1	chr1	-2.20292	6.64865	2.17e-11
ENSG00000128242	GAL3ST1	galactose-3-O-sulfotransferase 1	chr22	2.46232	6.92119	2.21e-11
ENSG00000151632	AKR1C2	aldo-keto reductase family 1 member C2	chr10	-2.26367	6.8298	2.59e-11
ENSG00000140416	TPM1	tropomyosin 1 (alpha)	chr15	-2.11443	7.34716	3.18e-11
ENSG00000156475	PPP2R2B	protein phosphatase 2 regulatory subunit Bbeta	chr5	2.52157	6.95313	3.32e-11
ENSG00000178695	KCTD12	potassium channel tetramerization domain containing 12	chr13	2.73811	7.22173	3.36e-11
ENSG00000198756	COLGALT2	collagen beta(1-O)galactosyltransferase 2	chr1	2.32617	7.09852	3.38e-11
ENSG00000132692	BCAN	brevican	chr1	2.85246	6.92707	3.79e-11
ENSG00000175928	LRRN1	leucine rich repeat neuronal 1	chr3	-2.27408	6.73499	4.56e-11
ENSG00000091129	NRCAM	neuronal cell adhesion molecule	chr7	-2.12968	7.11028	5.75e-11
ENSG00000162981	FAM84A	family with sequence similarity 84 member A	chr2	-2.19173	6.61366	6.15e-11
ENSG00000171206	TRIM8	tripartite motif containing 8	chr10	-1.75334	8.06305	7.78e-11
ENSG00000147588	PMP2	peripheral myelin protein 2	chr8	2.64455	6.76419	7.84e-11
ENSG00000074047	GLI2	GLI family zinc finger 2	chr2	-2.13633	6.62434	8.09e-11
ENSG00000162551	ALPL	alkaline phosphatase, liver/bone/kidney	chr1	-1.97264	6.5742	8.56e-11
ENSG00000169562	GJB1	gap junction protein beta 1	chrX	2.43592	6.78715	9.27e-11
ENSG00000163235	TGFA	transforming growth factor alpha	chr2	2.16309	6.64271	1.02e-10
ENSG00000112902	SEMA5A	semaphorin 5A	chr5	-2.23175	6.92564	1.08e-10
ENSG00000114631	PODXL2	podocalyxin like 2	chr3	2.25717	7.3126	1.25e-10
ENSG00000007384	RHBDF1	rhomboid 5 homolog 1	chr16	1.84257	8.61959	1.49e-10
ENSG00000169860	P2RY1	purinergic receptor P2Y1	chr3	2.26828	7.11883	1.66e-10
ENSG00000198795	ZNF521	zinc finger protein 521	chr18	-1.79828	7.58429	1.76e-10
ENSG00000156299	TIAM1	T-cell lymphoma invasion and metastasis 1	chr21	1.44521	9.35579	1.93e-10
ENSG00000096433	ITPR3	inositol 1,4,5-trisphosphate receptor type 3	chr6	2.14795	7.20254	1.95e-10
ENSG00000050555	LAMC3	laminin subunit gamma 3	chr9	-2.16815	6.60876	2.96e-10
ENSG00000106714	CNTNAP3	contactin associated protein-like 3	chr9	-2.01847	7.15398	3.01e-10
ENSG00000187005	KRTAP21-1	keratin associated protein 21-1	chr21	2.02588	6.62137	3.17e-10
ENSG00000111728	ST8SIA1	ST8 alpha-N-acetyl-neuraminide alpha-2,8-sialyltransferase 1	chr12	2.15135	7.25422	3.34e-10
ENSG00000173786	CNP	2',3'-cyclic nucleotide 3' phosphodiesterase	chr17	1.64865	8.40846	3.41e-10
ENSG00000109861	CTSC	cathepsin C	chr11	1.94884	7.57607	3.41e-10
ENSG00000204580	MIR4640	microRNA 4640	NA	-1.94865	7.16442	3.41e-10
ENSG00000121068	TBX2	T-box 2	chr17	2.25019	6.65556	3.97e-10
ENSG00000168621	GDNF	glial cell derived neurotrophic factor	chr5	2.58487	6.76084	4.1e-10
ENSG00000273706	LHX1	LIM homeobox 1	chr17	2.50223	6.69863	5.81e-10
ENSG00000104833	TUBB4A	tubulin beta 4A class IVa	chr19	-1.93717	6.72983	7.58e-10
ENSG00000183779	ZNF703	zinc finger protein 703	chr8	-1.7253	8.06212	7.59e-10
ENSG00000164318	EGFLAM	EGF like, fibronectin type III and laminin G domains	chr5	1.74781	8.22549	9.97e-10
ENSG00000166582	CENPV	centromere protein V	chr17	1.76099	8.02349	1.19e-09
ENSG00000113504	SLC12A7	solute carrier family 12 member 7	chr5	-2.18869	6.7564	1.25e-09
ENSG00000072832	CRMP1	collapsin response mediator protein 1	chr4	1.68882	8.28921	1.27e-09
ENSG00000181019	NQO1	NAD(P)H quinone dehydrogenase 1	chr16	-2.04775	6.95643	1.49e-09
ENSG00000083857	FAT1	FAT atypical cadherin 1	chr4	-1.85487	7.32431	1.67e-09
ENSG00000146112	PPP1R18	protein phosphatase 1 regulatory subunit 18	chr6_dbb_hap3	1.69031	8.74604	1.71e-09
ENSG00000178568	ERBB4	erb-b2 receptor tyrosine kinase 4	chr2	2.38129	6.85161	2.93e-09
ENSG00000036530	CYP46A1	cytochrome P450 family 46 subfamily A member 1	chr14	-2.19607	6.61724	2.93e-09
ENSG00000172164	SNTB1	syntrophin beta 1	chr8	2.38259	6.86442	3.08e-09
ENSG00000050438	SLC4A8	solute carrier family 4 member 8	chr12	-2.0382	6.92793	3.93e-09
ENSG00000139926	FRMD6	FERM domain containing 6	chr14	1.95896	7.52995	4.19e-09
ENSG00000157613	CREB3L1	cAMP responsive element binding protein 3 like 1	chr11	-2.09847	6.63437	4.28e-09
ENSG00000136504	KAT7	lysine acetyltransferase 7	chr17	1.8371	7.86376	4.82e-09
ENSG00000168386	FILIP1L	filamin A interacting protein 1 like	chr3	2.32715	6.99127	5.16e-09
ENSG00000102935	ZNF423	zinc finger protein 423	chr16	-1.79473	7.38783	5.62e-09
ENSG00000137203	TFAP2A	transcription factor AP-2 alpha	chr6	2.05711	8.22152	5.66e-09
ENSG00000168575	SLC20A2	solute carrier family 20 member 2	chr8	-1.86725	7.19083	5.83e-09
ENSG00000164588	HCN1	hyperpolarization activated cyclic nucleotide gated potassium channel 1	chr5	2.60591	6.89784	7.35e-09
ENSG00000004059	ARF5	ADP ribosylation factor 5	chr7	-1.66263	6.55553	7.41e-09
ENSG00000184906	LOC101929583	methylenetetrahydrofolate dehydrogenase (NADP+ dependent) 1-like pseudogene	NA	1.95189	6.62443	9.34e-09
ENSG00000183833	MAATS1	MYCBP associated and testis expressed 1	chr3	-2.00769	6.59154	1.06e-08
ENSG00000234224	TMEM229A	transmembrane protein 229A	chr7	1.71737	7.96954	1.23e-08
ENSG00000141441	GAREM1	GRB2 associated regulator of MAPK1 subtype 1	chr18	2.15009	7.08886	1.23e-08
ENSG00000172159	FRMD3	FERM domain containing 3	chr9	-2.02464	6.72317	1.55e-08
ENSG00000157423	HYDIN	HYDIN, axonemal central pair apparatus protein	chr16	-1.89175	6.60666	1.64e-08
ENSG00000167371	PRRT2	proline rich transmembrane protein 2	chr16	-1.93027	6.84959	1.68e-08
ENSG00000278233	LOC100008587	RNA, 5.8S ribosomal	NA	-1.77926	7.27565	1.74e-08
ENSG00000157510	AFAP1L1	actin filament associated protein 1 like 1	chr5	2.18418	6.76027	1.8e-08
ENSG00000143162	CREG1	cellular repressor of E1A stimulated genes 1	chr1	-1.74332	8.06511	2.03e-08
ENSG00000077264	PAK3	p21 (RAC1) activated kinase 3	chrX	-2.04079	6.68016	2.33e-08
ENSG00000128283	CDC42EP1	CDC42 effector protein 1	chr22	1.91557	7.54892	2.45e-08
ENSG00000102024	PLS3	plastin 3	chrX	1.52796	8.49187	2.65e-08
ENSG00000116667	C1orf21	chromosome 1 open reading frame 21	chr1	1.93498	7.34027	3.13e-08
ENSG00000153234	NR4A2	nuclear receptor subfamily 4 group A member 2	chr2	2.28899	6.72975	3.86e-08
ENSG00000143333	RGS16	regulator of G-protein signaling 16	chr1	-2.47978	6.76436	4.01e-08
ENSG00000145687	SSBP2	single stranded DNA binding protein 2	chr5	-1.56311	8.25873	4.18e-08
ENSG00000142494	SLC47A1	solute carrier family 47 member 1	chr17	2.16591	6.81011	4.64e-08
ENSG00000188906	LRRK2	leucine rich repeat kinase 2	chr12	2.08905	6.68827	5.11e-08
ENSG00000242808	SOX2-OT	SOX2 overlapping transcript	NA	1.94976	7.20566	6.23e-08
ENSG00000121966	CXCR4	C-X-C motif chemokine receptor 4	chr2	1.91867	7.88629	6.41e-08
ENSG00000123358	NR4A1	nuclear receptor subfamily 4 group A member 1	chr12	1.90598	7.42841	6.42e-08
ENSG00000035403	VCL	vinculin	chr10	-1.56598	8.32377	8.24e-08
ENSG00000173262	SLC2A14	solute carrier family 2 member 14	chr12	-1.77593	6.77379	8.38e-08
ENSG00000172458	IL17D	interleukin 17D	chr13	2.19817	6.71553	9.62e-08
ENSG00000154529	LOC100289279	contactin associated protein-like 3-like	NA	-1.75319	7.41197	9.7e-08
ENSG00000225581	TRIM53AP	tripartite motif containing 53A, pseudogene	chr11	1.87104	6.59681	1e-07
ENSG00000130429	ARPC1B	actin related protein 2/3 complex subunit 1B	chr7	1.59039	7.97865	1.07e-07
ENSG00000115339	GALNT3	polypeptide N-acetylgalactosaminyltransferase 3	chr2	1.93484	6.61855	1.16e-07
ENSG00000078114	NEBL	nebulette	chr10	-1.98502	6.68394	1.21e-07
ENSG00000185634	SHC4	SHC adaptor protein 4	chr15	2.13393	6.89939	1.23e-07
ENSG00000165238	WNK2	WNK lysine deficient protein kinase 2	chr9	-1.92771	6.61049	1.33e-07
ENSG00000180287	PLD5	phospholipase D family member 5	chr1	-2.10082	6.72999	1.7e-07
ENSG00000241956	LOC102546299	uncharacterized LOC102546299	NA	-1.96243	6.75182	1.82e-07
ENSG00000101638	ST8SIA5	ST8 alpha-N-acetyl-neuraminide alpha-2,8-sialyltransferase 5	chr18	2.06609	6.72168	1.82e-07
ENSG00000160360	GPSM1	G-protein signaling modulator 1	chr9	1.91724	7.11546	1.84e-07
ENSG00000162576	MXRA8	matrix remodeling associated 8	chr1	-2.03936	6.67095	1.86e-07
ENSG00000187134	AKR1C1	aldo-keto reductase family 1 member C1	chr10	-1.96351	6.85302	2.02e-07
ENSG00000173163	COMMD1	copper metabolism domain containing 1	chr2	-1.48178	7.4744	2.03e-07
ENSG00000219926	LOC102723968	uncharacterized LOC102723968	NA	1.6889	6.5864	2.06e-07
ENSG00000198121	LPAR1	lysophosphatidic acid receptor 1	chr9	-1.95545	7.09802	2.26e-07
ENSG00000076554	TPD52	tumor protein D52	chr8	2.0412	6.86357	2.28e-07
ENSG00000107438	PDLIM1	PDZ and LIM domain 1	chr10	1.93843	7.6188	2.38e-07
ENSG00000169946	ZFPM2	zinc finger protein, FOG family member 2	chr8	-1.81684	6.66827	2.82e-07
ENSG00000198743	SLC5A3	solute carrier family 5 member 3	chr21	-1.58451	7.94257	4.09e-07
ENSG00000059804	SLC2A3	solute carrier family 2 member 3	chr12	-1.69338	7.31107	4.29e-07
ENSG00000275342	PRAG1	PEAK1 related kinase activating pseudokinase 1	chr8	1.9098	7.7314	4.41e-07
ENSG00000113721	PDGFRB	platelet derived growth factor receptor beta	chr5	-1.88707	6.63308	4.52e-07
ENSG00000102445	RUBCNL	RUN and cysteine rich domain containing beclin 1 interacting protein like	chr13	1.87372	7.17371	4.62e-07
ENSG00000149177	PTPRJ	protein tyrosine phosphatase, receptor type J	chr11	1.96101	7.09846	5.04e-07
ENSG00000143248	RGS5	regulator of G-protein signaling 5	chr1	-1.95297	6.6127	5.24e-07
ENSG00000099984	GSTT2	glutathione S-transferase theta 2 (gene/pseudogene)	chr22	1.80847	6.60049	5.82e-07
ENSG00000129946	SHC2	SHC adaptor protein 2	chr19	2.01594	6.73151	6.65e-07
ENSG00000117394	SLC2A1	solute carrier family 2 member 1	chr1	-1.98996	6.80496	9.47e-07
ENSG00000072163	LIMS2	LIM zinc finger domain containing 2	chr2	1.73236	6.59006	1.05e-06
ENSG00000154856	APCDD1	APC down-regulated 1	chr18	-1.652	8.21839	1.09e-06
ENSG00000170412	GPRC5C	G protein-coupled receptor class C group 5 member C	chr17	-1.79039	6.61962	1.2e-06
ENSG00000143878	RHOB	ras homolog family member B	chr2	1.61496	8.10322	1.49e-06
ENSG00000133433	GSTT2B	glutathione S-transferase theta 2B (gene/pseudogene)	NA	1.73651	6.59079	1.49e-06
ENSG00000139364	TMEM132B	transmembrane protein 132B	chr12	-1.93724	6.60847	1.5e-06
ENSG00000102934	PLLP	plasmolipin	chr16	-1.94947	6.6314	1.63e-06
ENSG00000170927	PKHD1	PKHD1, fibrocystin/polyductin	chr6	2.19644	6.79675	1.67e-06
ENSG00000092068	SLC7A8	solute carrier family 7 member 8	chr14	-1.71429	6.57519	1.79e-06
ENSG00000070808	CAMK2A	calcium/calmodulin dependent protein kinase II alpha	chr5	-1.778	6.59112	1.92e-06
ENSG00000162374	ELAVL4	ELAV like RNA binding protein 4	chr1	1.99135	6.65694	2.51e-06
ENSG00000165475	CRYL1	crystallin lambda 1	chr13	1.75454	7.82662	2.53e-06
ENSG00000164733	CTSB	cathepsin B	chr8	-1.54747	8.16382	2.59e-06
ENSG00000186684	CYP27C1	cytochrome P450 family 27 subfamily C member 1	chr2	1.89562	6.94398	2.6e-06
ENSG00000137331	IER3	immediate early response 3	chr6_dbb_hap3	-1.88655	6.75138	2.61e-06
ENSG00000021300	PLEKHB1	pleckstrin homology domain containing B1	chr11	1.97225	7.16266	2.81e-06
ENSG00000081189	MEF2C	myocyte enhancer factor 2C	chr5	1.75951	7.46905	2.87e-06
ENSG00000091136	LAMB1	laminin subunit beta 1	chr7	1.4377	9.18509	3.12e-06
ENSG00000184305	CCSER1	coiled-coil serine rich protein 1	chr4	1.84801	6.66419	3.28e-06
ENSG00000067113	PLPP1	phospholipid phosphatase 1	chr5	1.778	7.29077	3.47e-06
ENSG00000151012	SLC7A11	solute carrier family 7 member 11	chr4	-1.8052	7.33353	3.5e-06
ENSG00000115828	QPCT	glutaminyl-peptide cyclotransferase	chr2	2.03261	6.87709	3.69e-06
ENSG00000137968	SLC44A5	solute carrier family 44 member 5	chr1	-1.91691	6.77748	3.81e-06
ENSG00000187140	FOXD3	forkhead box D3	chr1	1.57072	8.25441	4.18e-06
ENSG00000244509	APOBEC3C	apolipoprotein B mRNA editing enzyme catalytic subunit 3C	chr22	1.90672	7.1345	4.9e-06
ENSG00000125398	SOX9	SRY-box 9	chr17	-1.81146	7.67862	4.97e-06
ENSG00000003249	DBNDD1	dysbindin domain containing 1	chr16	1.90518	7.12621	5.24e-06
ENSG00000187867	PALM3	paralemmin 3	chr19	-1.74605	6.63671	5.68e-06
ENSG00000129009	ISLR	immunoglobulin superfamily containing leucine rich repeat	chr15	-1.7967	6.59979	5.91e-06
ENSG00000169258	GPRIN1	G protein regulated inducer of neurite outgrowth 1	chr5	1.62237	6.57771	6.11e-06
ENSG00000100505	TRIM9	tripartite motif containing 9	chr14	1.73531	7.45104	6.29e-06
ENSG00000181274	FRAT2	FRAT2, WNT signaling pathway regulator	chr10	1.73087	6.60307	6.51e-06
ENSG00000148798	INA	internexin neuronal intermediate filament protein alpha	chr10	-1.89403	6.61964	6.57e-06
ENSG00000011028	MRC2	mannose receptor C type 2	chr17	-1.59796	7.12661	6.82e-06
ENSG00000159307	SCUBE1	signal peptide, CUB domain and EGF like domain containing 1	chr22	-1.68212	6.57645	6.91e-06
ENSG00000175785	PRIMA1	proline rich membrane anchor 1	chr14	1.81528	6.66211	6.97e-06
ENSG00000077044	DGKD	diacylglycerol kinase delta	chr2	-1.56102	7.75639	6.99e-06
ENSG00000169604	ANTXR1	anthrax toxin receptor 1	chr2	-1.63006	7.23009	7.42e-06
ENSG00000010610	CD4	CD4 molecule	chr12	-1.84741	6.65224	7.42e-06
ENSG00000122861	PLAU	plasminogen activator, urokinase	chr10	-1.90849	7.04013	8.29e-06
ENSG00000115306	SPTBN1	spectrin beta, non-erythrocytic 1	chr2	1.3356	9.33523	8.42e-06
ENSG00000141576	RNF157	ring finger protein 157	chr17	1.71793	7.31739	8.52e-06
ENSG00000019549	SNAI2	snail family transcriptional repressor 2	chr8	-1.93888	7.1144	8.67e-06
ENSG00000266524	GDF10	growth differentiation factor 10	chr10	-1.88548	6.79674	8.67e-06
ENSG00000114547	ROPN1B	rhophilin associated tail protein 1B	chr3	1.45934	6.55629	8.78e-06
ENSG00000088538	DOCK3	dedicator of cytokinesis 3	chr3	-1.71132	6.66267	9.37e-06
ENSG00000112139	MDGA1	MAM domain containing glycosylphosphatidylinositol anchor 1	chr6	-1.87565	6.92373	9.96e-06
ENSG00000164402	2008-09-01	septin 8	chr5	1.70443	7.49709	1.14e-05
ENSG00000174307	PHLDA3	pleckstrin homology like domain family A member 3	chr1	1.81164	6.7708	1.18e-05
ENSG00000111328	CDK2AP1	cyclin dependent kinase 2 associated protein 1	chr12	-1.58743	6.60224	1.22e-05
ENSG00000155324	GRAMD3	GRAM domain containing 3	chr5	1.93776	7.06018	1.39e-05
ENSG00000118762	PKD2	polycystin 2, transient receptor potential cation channel	chr4	1.57242	8.39943	1.58e-05
ENSG00000011201	ANOS1	anosmin 1	chrX	1.94485	6.71673	1.64e-05
ENSG00000074266	MIR6755	microRNA 6755	NA	1.78282	7.27956	1.73e-05
ENSG00000103740	ACSBG1	acyl-CoA synthetase bubblegum family member 1	chr15	-1.74001	6.92009	1.78e-05
ENSG00000182492	BGN	biglycan	chrX	-1.67081	7.51824	1.8e-05
ENSG00000234420	ZNF37BP	zinc finger protein 37B, pseudogene	NA	1.49489	8.15873	1.95e-05
ENSG00000125355	TMEM255A	transmembrane protein 255A	chrX	-1.76199	6.59285	2.02e-05
ENSG00000230798	FOXD3-AS1	FOXD3 antisense RNA 1 (head to head)	NA	1.565	7.68298	2.23e-05
ENSG00000105928	DFNA5	DFNA5, deafness associated tumor suppressor	chr7	1.897	6.78171	2.28e-05
ENSG00000146700	SSC4D	scavenger receptor cysteine rich family member with 4 domains	chr7	-1.66009	6.68505	2.29e-05
ENSG00000104368	PLAT	plasminogen activator, tissue type	chr8	1.57754	8.25037	2.41e-05
ENSG00000157734	SNX22	sorting nexin 22	chr15	1.65629	6.61372	2.42e-05
ENSG00000212864	RNF208	ring finger protein 208	chr9	1.82957	6.71539	2.71e-05
ENSG00000100078	PLA2G3	phospholipase A2 group III	chr22	-1.62698	6.79729	2.85e-05
ENSG00000128564	VGF	VGF nerve growth factor inducible	chr7	-1.95144	6.88721	2.92e-05
ENSG00000179604	CDC42EP4	CDC42 effector protein 4	chr17	-1.80318	6.79777	2.98e-05
ENSG00000129116	PALLD	palladin, cytoskeletal associated protein	chr4	-1.51787	7.67563	3.02e-05
ENSG00000075275	CELSR1	cadherin EGF LAG seven-pass G-type receptor 1	chr22	-1.66632	6.73721	3.17e-05
ENSG00000100092	SH3BP1	SH3 domain binding protein 1	chr22	1.71471	7.06037	3.21e-05
ENSG00000116649	SRM	spermidine synthase	chr1	1.63879	7.51119	3.31e-05
ENSG00000137642	SORL1	sortilin related receptor 1	chr11	-1.77796	6.59525	3.49e-05
ENSG00000127863	TNFRSF19	TNF receptor superfamily member 19	chr13	1.4839	8.06224	3.64e-05
ENSG00000088756	ARHGAP28	Rho GTPase activating protein 28	chr18	-1.60635	6.97153	3.69e-05
ENSG00000274628	FAM95B1	family with sequence similarity 95 member B1	NA	1.82929	6.71226	3.8e-05
ENSG00000165490	DDIAS	DNA damage induced apoptosis suppressor	chr11	1.82234	6.72444	3.85e-05
ENSG00000133121	STARD13	StAR related lipid transfer domain containing 13	chr13	1.69403	7.46361	3.94e-05
ENSG00000102053	ZC3H12B	zinc finger CCCH-type containing 12B	chrX	-1.81575	6.71654	4e-05
ENSG00000103647	CORO2B	coronin 2B	chr15	1.81363	7.25894	4.45e-05
ENSG00000141449	GREB1L	growth regulation by estrogen in breast cancer 1 like	chr18	-1.64651	7.42511	4.49e-05
ENSG00000129474	AJUBA	ajuba LIM protein	chr14	-1.75426	6.76636	5.78e-05
ENSG00000075340	ADD2	adducin 2	chr2	1.85067	7.02566	6.04e-05
ENSG00000189056	RELN	reelin	chr7	-1.78386	6.64434	6.8e-05
ENSG00000077782	FGFR1	fibroblast growth factor receptor 1	chr8	-1.49963	7.95221	7.73e-05
ENSG00000215559	ANKRD20A11P	ankyrin repeat domain 20 family member A11, pseudogene	NA	1.39042	6.55878	7.92e-05
ENSG00000129595	EPB41L4A	erythrocyte membrane protein band 4.1 like 4A	chr5	1.8634	6.86434	8.05e-05
ENSG00000204347	BTBD17	BTB domain containing 17	chr17	-1.49646	6.55817	8.7e-05
ENSG00000158966	CACHD1	cache domain containing 1	chr1	-1.51998	7.13905	0.000102176
ENSG00000168772	CXXC4	CXXC finger protein 4	chr4	-1.63017	7.14066	0.000104514
ENSG00000083444	PLOD1	procollagen-lysine,2-oxoglutarate 5-dioxygenase 1	chr1	-1.55747	7.22764	0.000108619
ENSG00000089472	HEPH	hephaestin	chrX	-1.74856	6.83002	0.000108619
ENSG00000243156	MICAL3	microtubule associated monooxygenase, calponin and LIM domain containing 3	chr22	1.67415	7.11935	0.00011762
ENSG00000204335	SP5	Sp5 transcription factor	chr2	-1.66928	7.30466	0.000123451
ENSG00000110660	SLC35F2	solute carrier family 35 member F2	chr11	1.77974	7.15961	0.000123451
ENSG00000117707	PROX1	prospero homeobox 1	chr1	1.68703	6.69437	0.000124507
ENSG00000119403	PHF19	PHD finger protein 19	chr9	1.76155	7.03211	0.000131638
ENSG00000196511	TPK1	thiamin pyrophosphokinase 1	chr7	1.54139	7.32282	0.000133777
ENSG00000135905	DOCK10	dedicator of cytokinesis 10	chr2	1.73489	6.98911	0.000139128
ENSG00000163132	MSX1	msh homeobox 1	chr4	-1.85086	6.75459	0.000158897
ENSG00000092470	WDR76	WD repeat domain 76	chr15	1.78146	6.91629	0.000164535
ENSG00000124942	AHNAK	AHNAK nucleoprotein	chr11	-1.78863	7.08783	0.000183734
ENSG00000082293	COL19A1	collagen type XIX alpha 1 chain	chr6	1.60866	6.59554	0.000229149
ENSG00000182263	FIGN	fidgetin, microtubule severing factor	chr2	1.34946	8.81684	0.00023788
ENSG00000179915	NRXN1	neurexin 1	chr2	1.57347	6.77682	0.00024041
ENSG00000122644	ARL4A	ADP ribosylation factor like GTPase 4A	chr7	-1.5878	6.79773	0.000270034
ENSG00000169129	AFAP1L2	actin filament associated protein 1 like 2	chr10	1.46803	7.74564	0.000272719
ENSG00000106665	CLIP2	CAP-Gly domain containing linker protein 2	chr7	-1.47279	6.78756	0.000277215
ENSG00000163071	SPATA18	spermatogenesis associated 18	chr4	1.67666	6.7102	0.000287551
ENSG00000139354	GAS2L3	growth arrest specific 2 like 3	chr12	1.70468	7.31408	0.000292416
ENSG00000134802	SLC43A3	solute carrier family 43 member 3	chr11	1.63901	6.67288	0.000323188
ENSG00000126733	DACH2	dachshund family transcription factor 2	chrX	-1.6344	6.69488	0.000326407
ENSG00000133401	PDZD2	PDZ domain containing 2	chr5	-1.46877	6.60924	0.000359564
ENSG00000186976	EFCAB6	EF-hand calcium binding domain 6	chr22	-1.3331	6.54433	0.000372795
ENSG00000168268	NT5DC2	5'-nucleotidase domain containing 2	chr3	1.38365	8.22555	0.000381297
ENSG00000100968	NFATC4	nuclear factor of activated T-cells 4	chr14	-1.50278	7.13842	0.000385823
ENSG00000232977	LINC00327	long intergenic non-protein coding RNA 327	NA	1.41693	6.58506	0.00039407
ENSG00000170275	CRTAP	cartilage associated protein	chr3	1.32044	9.46913	0.000447892
ENSG00000165959	CLMN	calmin	chr14	1.67651	6.882	0.000469993
ENSG00000272168	CASC15	cancer susceptibility 15 (non-protein coding)	NA	-1.49063	6.67708	0.000520129
ENSG00000148737	TCF7L2	transcription factor 7 like 2	chr10	1.40922	8.41187	0.000522996
ENSG00000280870	MIR325HG	MIR325 host gene	NA	-1.53611	6.68406	0.00059006
ENSG00000182168	UNC5C	unc-5 netrin receptor C	chr4	-1.54603	7.05235	0.000590265
ENSG00000010818	HIVEP2	human immunodeficiency virus type I enhancer binding protein 2	chr6	-1.58757	6.72838	0.000620444
ENSG00000163513	TGFBR2	transforming growth factor beta receptor 2	chr3	1.63009	7.16933	0.000687222
ENSG00000120594	PLXDC2	plexin domain containing 2	chr10	-1.35808	6.55167	0.000690933
ENSG00000197381	ADARB1	adenosine deaminase, RNA specific B1	chr21	1.60455	7.09531	0.000693149
ENSG00000166147	FBN1	fibrillin 1	chr15	-1.61216	7.05833	0.000699037
ENSG00000138604	GLCE	glucuronic acid epimerase	chr15	-1.5624	7.10916	0.000737116
ENSG00000066032	CTNNA2	catenin alpha 2	chr2	-1.40993	6.56003	0.000748971
ENSG00000187164	SHTN1	shootin 1	chr10	1.63272	7.01806	0.000749542
ENSG00000157502	MUM1L1	MUM1 like 1	chrX	-1.52248	6.62632	0.000750926
ENSG00000005073	HOXA11	homeobox A11	chr7	-1.64131	6.68128	0.000754015
ENSG00000143845	ETNK2	ethanolamine kinase 2	chr1	1.67866	6.7182	0.000758893
ENSG00000275700	AATF	apoptosis antagonizing transcription factor	chr17	1.51252	7.25309	0.000776595
ENSG00000196218	RYR1	ryanodine receptor 1	chr19	-1.48441	6.68867	0.000776595
ENSG00000189067	LITAF	lipopolysaccharide induced TNF factor	chr16	1.36325	8.37333	0.000781833
ENSG00000146072	TNFRSF21	TNF receptor superfamily member 21	chr6	-1.57439	6.74633	0.000792365
ENSG00000115556	PLCD4	phospholipase C delta 4	chr2	-1.5726	6.72375	0.000809788
ENSG00000169136	MIR4751	microRNA 4751	NA	-1.63934	6.9729	0.000826126
ENSG00000197905	TEAD4	TEA domain transcription factor 4	chr12	1.47757	6.63167	0.000833303
ENSG00000176170	SPHK1	sphingosine kinase 1	chr17	-1.49103	6.73848	0.000833303
ENSG00000167680	SEMA6B	semaphorin 6B	chr19	1.57593	6.74101	0.000842494
ENSG00000188517	COL25A1	collagen type XXV alpha 1 chain	chr4	1.55625	6.71197	0.000850559
ENSG00000196502	SULT1A1	sulfotransferase family 1A member 1	chr16	-1.5017	6.77308	0.000863266
ENSG00000157927	RADIL	Rap associating with DIL domain	chr7	-1.50608	6.70867	0.000871077
ENSG00000109472	CPE	carboxypeptidase E	chr4	-1.445	7.13353	0.000873358
ENSG00000185565	LSAMP	limbic system-associated membrane protein	chr3	1.39241	8.36144	0.000890277
ENSG00000127578	WFIKKN1	WAP, follistatin/kazal, immunoglobulin, kunitz and netrin domain containing 1	chr16	-1.49736	6.66514	0.000890277
ENSG00000188483	IER5L	immediate early response 5 like	chr9	-1.47769	7.13524	0.000897879
ENSG00000109819	PPARGC1A	PPARG coactivator 1 alpha	chr4	-1.43421	6.62708	0.000897879
ENSG00000087495	PHACTR3	phosphatase and actin regulator 3	chr20	1.60898	6.88198	0.000973535
ENSG00000116962	NID1	nidogen 1	chr1	1.36597	8.37055	0.00100907
ENSG00000153976	HS3ST3B1	heparan sulfate-glucosamine 3-sulfotransferase 3B1	chr17	1.67214	6.79967	0.00101752
ENSG00000105767	CADM4	cell adhesion molecule 4	chr19	1.52171	7.1933	0.00104307
ENSG00000105971	CAV2	caveolin 2	chr7	1.57406	6.64544	0.00109375
ENSG00000071205	ARHGAP10	Rho GTPase activating protein 10	chr4	-1.49947	6.61917	0.00110555
ENSG00000197147	LRRC8B	leucine rich repeat containing 8 family member B	chr1	1.52911	7.1929	0.00110999
ENSG00000248587	GDNF-AS1	GDNF antisense RNA 1 (head to head)	chr5	1.48972	6.58825	0.00114473
ENSG00000059573	ALDH18A1	aldehyde dehydrogenase 18 family member A1	chr10	1.38917	7.68955	0.00114473
ENSG00000243927	MRPS6	mitochondrial ribosomal protein S6	chr21	-1.41454	7.26831	0.00114473
ENSG00000196482	ESRRG	estrogen related receptor gamma	chr1	-1.49474	6.69912	0.00115721
ENSG00000166272	WBP1L	WW domain binding protein 1 like	chr10	-1.41986	7.3273	0.0011638
ENSG00000248905	FMN1	formin 1	chr15	-1.36228	6.56577	0.00117889
ENSG00000106004	HOXA5	homeobox A5	chr7	-1.47816	7.75916	0.00122202
ENSG00000167861	HID1	HID1 domain containing	chr17	1.62249	6.66505	0.00122202
ENSG00000276600	RAB7B	RAB7B, member RAS oncogene family	NA	1.42742	6.6021	0.00128341
ENSG00000118523	CTGF	connective tissue growth factor	chr6	-1.57542	6.6026	0.00130588
ENSG00000133069	TMCC2	transmembrane and coiled-coil domain family 2	chr1	1.58359	6.95567	0.00136784
ENSG00000138448	ITGAV	integrin subunit alpha V	chr2	1.35248	8.19814	0.00139468
ENSG00000137474	MYO7A	myosin VIIA	chr11	-1.54154	6.60381	0.00142553
ENSG00000230910	LOC101928307	uncharacterized LOC101928307	NA	1.34811	6.56312	0.00142553
ENSG00000137936	BCAR3	breast cancer anti-estrogen resistance 3	chr1	1.51048	7.61844	0.00146393
ENSG00000064225	ST3GAL6	ST3 beta-galactoside alpha-2,3-sialyltransferase 6	chr3	1.51556	7.21139	0.00147166
ENSG00000181444	ZNF467	zinc finger protein 467	chr7	-1.5491	6.77971	0.00147166
ENSG00000198133	TMEM229B	transmembrane protein 229B	chr14	1.38464	6.59806	0.00147166
ENSG00000253554	LOC102724623	uncharacterized LOC102724623	NA	-1.29984	6.57235	0.00165975
ENSG00000149591	TAGLN	transgelin	chr11	-1.69949	6.7245	0.00166932
ENSG00000139880	CDH24	cadherin 24	chr14	-1.44374	6.72064	0.00166932
ENSG00000122042	UBL3	ubiquitin like 3	chr13	1.36362	8.01067	0.00168099
ENSG00000123146	ADGRE5	adhesion G protein-coupled receptor E5	chr19	-1.49116	6.69045	0.00168295
ENSG00000138080	EMILIN1	elastin microfibril interfacer 1	chr2	-1.55082	7.02374	0.00170197
ENSG00000186998	EMID1	EMI domain containing 1	chr22	-1.48008	6.60069	0.00176695
ENSG00000119865	CNRIP1	cannabinoid receptor interacting protein 1	chr2	1.57169	6.84103	0.00183031
ENSG00000172986	GXYLT2	glucoside xylosyltransferase 2	chr3	-1.50475	6.63339	0.00186164
ENSG00000218336	TENM3	teneurin transmembrane protein 3	chr4	-1.40348	7.43311	0.00186348
ENSG00000128594	LRRC4	leucine rich repeat containing 4	chr7	1.5394	7.21393	0.00186556
ENSG00000255559	ZNF252P-AS1	ZNF252P antisense RNA 1	chr8	-1.37499	6.58272	0.00209538
ENSG00000159842	ABR	active BCR-related	chr17	-1.36639	7.38042	0.00213163
ENSG00000139329	LUM	lumican	chr12	-1.74876	6.84373	0.00214791
ENSG00000101096	NFATC2	nuclear factor of activated T-cells 2	chr20	1.52769	6.64635	0.00226187
ENSG00000117450	PRDX1	peroxiredoxin 1	chr1	-1.31672	7.6672	0.00226386
ENSG00000127948	MIR4651	microRNA 4651	NA	-1.36506	7.24597	0.00226527
ENSG00000162878	PKDCC	protein kinase domain containing, cytoplasmic	chr2	-1.41518	7.83	0.00229605
ENSG00000117069	ST6GALNAC5	ST6 N-acetylgalactosaminide alpha-2,6-sialyltransferase 5	chr1	-1.54605	6.62592	0.00230671
ENSG00000177694	NAALADL2	N-acetylated alpha-linked acidic dipeptidase like 2	chr3	-1.39539	6.68224	0.00230671
ENSG00000154217	PITPNC1	phosphatidylinositol transfer protein, cytoplasmic 1	chr17	1.60853	6.99334	0.00231857
ENSG00000277478	MIR6165	microRNA 6165	NA	1.07769	6.52822	0.00234396
ENSG00000145390	USP53	ubiquitin specific peptidase 53	chr4	1.55198	6.90925	0.00242929
ENSG00000106785	TRIM14	tripartite motif containing 14	chr9	1.62173	6.83862	0.00245422
ENSG00000160813	PPP1R35	protein phosphatase 1 regulatory subunit 35	chr7	1.6572	6.85591	0.00257026
ENSG00000205476	CCDC85C	coiled-coil domain containing 85C	chr14	-1.54494	6.83733	0.00265742
ENSG00000170017	ALCAM	activated leukocyte cell adhesion molecule	chr3	-1.51774	7.25608	0.002706
ENSG00000172037	LAMB2	laminin subunit beta 2	chr3	-1.38984	7.2566	0.00271368
ENSG00000254369	HOXA-AS3	HOXA cluster antisense RNA 3	chr7	-1.49609	6.63322	0.0027712
ENSG00000154734	ADAMTS1	ADAM metallopeptidase with thrombospondin type 1 motif 1	chr21	1.64388	7.08497	0.00282737
ENSG00000102081	FMR1	fragile X mental retardation 1	chrX	-1.36419	7.61002	0.00282737
ENSG00000248441	LOC105370994	uncharacterized LOC105370994	NA	1.30926	6.56834	0.00288553
ENSG00000215788	TNFRSF25	TNF receptor superfamily member 25	chr1	-1.39655	6.66299	0.00290905
ENSG00000127418	FGFRL1	fibroblast growth factor receptor-like 1	chr4	1.62482	6.82355	0.0029103
ENSG00000141384	TAF4B	TATA-box binding protein associated factor 4b	chr18	1.35858	6.58208	0.00304281
ENSG00000134769	DTNA	dystrobrevin alpha	chr18	-1.49758	6.90906	0.00323326
ENSG00000144847	IGSF11	immunoglobulin superfamily member 11	chr3	-1.54435	6.92339	0.00354514
ENSG00000204248	COL11A2	collagen type XI alpha 2 chain	chr6_dbb_hap3	1.49575	6.68875	0.00358375
ENSG00000162669	HFM1	HFM1, ATP dependent DNA helicase homolog	chr1	-1.43712	7.04294	0.00363182
ENSG00000169857	AVEN	apoptosis and caspase activation inhibitor	chr15	-1.37404	6.63977	0.00364406
ENSG00000250510	GPR162	G protein-coupled receptor 162	chr12	-1.37136	6.74802	0.00365434
ENSG00000166106	ADAMTS15	ADAM metallopeptidase with thrombospondin type 1 motif 15	chr11	1.55929	6.64551	0.00366331
ENSG00000092964	DPYSL2	dihydropyrimidinase like 2	chr8	-1.37225	7.60665	0.00373839
ENSG00000138639	ARHGAP24	Rho GTPase activating protein 24	chr4	-1.36521	6.57261	0.00382881
ENSG00000019582	CD74	CD74 molecule	chr5	1.58994	6.90676	0.00388522
ENSG00000120327	PCDHB14	protocadherin beta 14	chr5	-1.52489	6.60692	0.00388522
ENSG00000162783	IER5	immediate early response 5	chr1	-1.47752	7.20343	0.00413151
ENSG00000184949	FAM227A	family with sequence similarity 227 member A	chr22	-1.54122	6.83681	0.00416374
ENSG00000169432	SCN9A	sodium voltage-gated channel alpha subunit 9	chr2	1.44344	6.60534	0.00424316
ENSG00000272221	LOC101929072	uncharacterized LOC101929072	NA	-1.29414	6.55224	0.00431108
ENSG00000166091	CMTM5	CKLF like MARVEL transmembrane domain containing 5	chr14	1.16416	6.55391	0.0043393
ENSG00000120798	NR2C1	nuclear receptor subfamily 2 group C member 1	chr12	-1.36797	7.25112	0.0043457
ENSG00000143603	KCNN3	potassium calcium-activated channel subfamily N member 3	chr1	-1.36862	6.59837	0.00444504
ENSG00000137831	UACA	uveal autoantigen with coiled-coil domains and ankyrin repeats	chr15	1.35309	8.14336	0.00452348
ENSG00000055118	KCNH2	potassium voltage-gated channel subfamily H member 2	chr7	-1.49566	6.71328	0.0045786
ENSG00000144354	CDCA7	cell division cycle associated 7	chr2	1.48752	7.62097	0.00487442
ENSG00000164099	PRSS12	protease, serine 12	chr4	1.28246	6.58154	0.00489373
ENSG00000121440	PDZRN3	PDZ domain containing ring finger 3	chr3	1.55525	7.15237	0.00490948
ENSG00000104728	ARHGEF10	Rho guanine nucleotide exchange factor 10	chr8	1.32082	7.90619	0.00495125
ENSG00000228288	PCAT6	prostate cancer associated transcript 6 (non-protein coding)	NA	1.56425	6.74108	0.00498088
ENSG00000169071	ROR2	receptor tyrosine kinase like orphan receptor 2	chr9	-1.45288	6.82365	0.0051918
ENSG00000182667	NTM	neurotrimin	chr11	1.43918	6.64832	0.00521495
ENSG00000171119	NRTN	neurturin	chr19	1.43377	6.63883	0.00538272
ENSG00000116852	KIF21B	kinesin family member 21B	chr1	1.49911	7.15855	0.00550846
ENSG00000186469	GNG2	G protein subunit gamma 2	chr14	1.35252	7.67293	0.00550846
ENSG00000140564	FURIN	furin, paired basic amino acid cleaving enzyme	chr15	1.56842	6.78639	0.00558597
ENSG00000137266	SLC22A23	solute carrier family 22 member 23	chr6	-1.47557	6.81344	0.0055981
ENSG00000145685	LHFPL2	lipoma HMGIC fusion partner-like 2	chr5	1.44131	6.8787	0.0055981
ENSG00000163558	PRKCI	protein kinase C iota	chr3	1.39783	7.87736	0.0056842
ENSG00000135446	CDK4	cyclin dependent kinase 4	chr12	1.26912	8.59657	0.00601408
ENSG00000261879	LOC100130950	uncharacterized LOC100130950	chr17	-1.2293	6.56278	0.00619521
ENSG00000133169	BEX1	brain expressed X-linked 1	chrX	-1.47906	6.65104	0.00626513
ENSG00000153993	SEMA3D	semaphorin 3D	chr7	1.38167	6.59682	0.00650251
ENSG00000124406	ATP8A1	ATPase phospholipid transporting 8A1	chr4	1.43324	6.71463	0.00650664
ENSG00000245694	LOC101927480	uncharacterized LOC101927480	NA	-1.47642	7.04533	0.00666967
ENSG00000105281	SLC1A5	solute carrier family 1 member 5	chr19	1.41731	7.62208	0.00695622
ENSG00000151617	EDNRA	endothelin receptor type A	chr4	-1.52388	6.75853	0.00695622
ENSG00000107099	DOCK8	dedicator of cytokinesis 8	chr9	-1.26122	6.55314	0.00695622
ENSG00000112473	SLC39A7	solute carrier family 39 member 7	chr6_dbb_hap3	-1.33019	6.791	0.00706379
ENSG00000085276	MECOM	MDS1 and EVI1 complex locus	chr3	-1.41357	6.5856	0.00707963
ENSG00000256045	MTRNR2L10	MT-RNR2-like 10	chrX	1.40435	6.75486	0.00709436
ENSG00000106034	CPED1	cadherin like and PC-esterase domain containing 1	chr7	1.48609	6.96064	0.00716444
ENSG00000158715	SLC45A3	solute carrier family 45 member 3	chr1	1.45919	6.81743	0.00722494
ENSG00000223839	FAM95B1	family with sequence similarity 95 member B1	NA	1.21357	6.56787	0.00743811
ENSG00000168005	C11orf84	chromosome 11 open reading frame 84	chr11	1.36277	7.8767	0.0076814
ENSG00000119408	NEK6	NIMA related kinase 6	chr9	1.44737	6.74457	0.00801046
ENSG00000127564	PKMYT1	protein kinase, membrane associated tyrosine/threonine 1	chr16	1.55247	6.93399	0.00802458
ENSG00000139289	PHLDA1	pleckstrin homology like domain family A member 1	chr12	1.43006	7.68753	0.0083761
ENSG00000149480	MTA2	metastasis associated 1 family member 2	chr11	1.42286	7.12834	0.0085648
ENSG00000139679	LPAR6	lysophosphatidic acid receptor 6	chr13	1.49605	7.42949	0.00906676
ENSG00000118785	SPP1	secreted phosphoprotein 1	chr4	1.40028	6.61536	0.0092129
ENSG00000154678	PDE1C	phosphodiesterase 1C	chr7	1.31912	6.58851	0.00968547
ENSG00000099715	PCDH11X	protocadherin 11 X-linked	chrX	1.39285	6.62638	0.00978445
ENSG00000158859	ADAMTS4	ADAM metallopeptidase with thrombospondin type 1 motif 4	chr1	1.53317	6.85609	0.00987664
ENSG00000014914	MTMR11	myotubularin related protein 11	chr1	-1.52833	6.70542	0.00987664
ENSG00000205336	ADGRG1	adhesion G protein-coupled receptor G1	chr16	1.50856	6.96685	0.00994878
ENSG00000162614	NEXN	nexilin F-actin binding protein	chr1	-1.35243	6.60307	0.0102097
ENSG00000134709	HOOK1	hook microtubule tethering protein 1	chr1	1.54166	6.91311	0.0102956
ENSG00000273888	FRMD6-AS1	FRMD6 antisense RNA 1	NA	1.30656	6.59892	0.0105606
ENSG00000182871	COL18A1	collagen type XVIII alpha 1 chain	chr21	-1.29763	7.54579	0.0106881
ENSG00000196628	TCF4	transcription factor 4	chr18	-1.26744	8.00566	0.0107686
ENSG00000108679	LGALS3BP	galectin 3 binding protein	chr17	-1.26804	6.5755	0.0107698
ENSG00000105855	ITGB8	integrin subunit beta 8	chr7	-1.40641	6.70371	0.0112426
ENSG00000113552	GNPDA1	glucosamine-6-phosphate deaminase 1	chr5	1.42779	7.23616	0.0113475
ENSG00000102290	PCDH11X	protocadherin 11 X-linked	chrX	1.50843	6.71836	0.0114811
ENSG00000142089	IFITM3	interferon induced transmembrane protein 3	chr11	-1.32034	8.0731	0.0121204
ENSG00000109339	MAPK10	mitogen-activated protein kinase 10	chr4	-1.3818	6.84388	0.0131135
ENSG00000180509	KCNE1B	potassium voltage-gated channel subfamily E regulatory subunit 1B	NA	1.23944	6.58616	0.0132202
ENSG00000135253	KCP	kielin/chordin-like protein	chr7	-1.36093	6.62222	0.0133942
ENSG00000130762	ARHGEF16	Rho guanine nucleotide exchange factor 16	chr1	1.25906	6.58521	0.0140073
ENSG00000142611	PRDM16	PR/SET domain 16	chr1	1.33754	6.6013	0.014569
ENSG00000173678	SPDYE2B	speedy/RINGO cell cycle regulator family member E2B	chr7	-1.08409	6.53471	0.0150557
ENSG00000170775	GPR37	G protein-coupled receptor 37	chr7	1.33132	6.6467	0.0156664
ENSG00000121766	ZCCHC17	zinc finger CCHC-type containing 17	chr1	1.32979	7.36958	0.0156664
ENSG00000253203	GUSBP3	glucuronidase, beta pseudogene 3	NA	-1.24391	6.74734	0.0161996
ENSG00000135838	NPL	N-acetylneuraminate pyruvate lyase	chr1	1.44675	6.79427	0.0164195
ENSG00000114021	NIT2	nitrilase family member 2	chr3	1.42103	7.05561	0.0165093
ENSG00000100625	SIX4	SIX homeobox 4	chr14	-1.29605	6.61911	0.0167687
ENSG00000063180	CA11	carbonic anhydrase 11	chr19	-1.43325	6.89794	0.0170343
ENSG00000092853	CLSPN	claspin	chr1	1.46929	7.34874	0.0171911
ENSG00000037965	HOXC8	homeobox C8	chr12	-1.35092	7.31393	0.0177935
ENSG00000181744	C3orf58	chromosome 3 open reading frame 58	chr3	-1.34521	6.78784	0.0177935
ENSG00000169105	CHST14	carbohydrate sulfotransferase 14	chr15	1.43804	7.23938	0.0179442
ENSG00000164741	DLC1	DLC1 Rho GTPase activating protein	chr8	1.38724	7.45696	0.0182002
ENSG00000116729	WLS	wntless Wnt ligand secretion mediator	chr1	-1.22027	8.36616	0.0185243
ENSG00000135185	TMEM243	transmembrane protein 243	chr7	1.42471	6.92199	0.0186219
ENSG00000232956	SNHG15	small nucleolar RNA host gene 15	NA	1.42101	6.70228	0.0194084
ENSG00000197977	ELOVL2	ELOVL fatty acid elongase 2	chr6	1.19399	6.57206	0.0196505
ENSG00000092421	SEMA6A	semaphorin 6A	chr5	-1.43445	7.16222	0.0200578
ENSG00000197653	DNAH10	dynein axonemal heavy chain 10	chr12	1.4342	6.9484	0.0208708
ENSG00000167173	C15orf39	chromosome 15 open reading frame 39	chr15	1.38251	6.83831	0.0215968
ENSG00000221866	PLXNA4	plexin A4	chr7	1.27669	6.61365	0.0224171
ENSG00000254087	LYN	LYN proto-oncogene, Src family tyrosine kinase	chr8	-1.32115	6.76949	0.0224984
ENSG00000149633	KIAA1755	KIAA1755	chr20	1.35174	6.72842	0.0229775
ENSG00000198353	HOXC4	homeobox C4	chr12	-1.33464	6.87052	0.0231171
ENSG00000020577	SAMD4A	sterile alpha motif domain containing 4A	chr14	-1.21881	6.56266	0.0235602
ENSG00000145632	PLK2	polo like kinase 2	chr5	1.43717	6.98198	0.023664
ENSG00000145423	SFRP2	secreted frizzled related protein 2	chr4	-1.43281	6.89859	0.0243278
ENSG00000088340	FER1L4	fer-1 like family member 4, pseudogene	NA	-1.38551	6.89508	0.0243856
ENSG00000256087	ZNF432	zinc finger protein 432	chr19	-1.30195	6.69236	0.0244644
ENSG00000164574	GALNT10	polypeptide N-acetylgalactosaminyltransferase 10	chr5	1.34775	7.41218	0.024732
ENSG00000115758	ODC1	ornithine decarboxylase 1	chr2	-1.30987	7.61789	0.0249069
ENSG00000129951	PLPPR3	phospholipid phosphatase related 3	chr19	-1.10333	6.55488	0.0250536
ENSG00000133863	TEX15	testis expressed 15, meiosis and synapsis associated	chr8	1.23437	6.60436	0.0251738
ENSG00000130005	GAMT	guanidinoacetate N-methyltransferase	chr19	1.31324	6.72424	0.0252973
ENSG00000261279	ULK4P2	ULK4 pseudogene 2	NA	1.38105	6.77434	0.0254878
ENSG00000171766	GATM	glycine amidinotransferase	chr15	1.27695	6.66422	0.0257132
ENSG00000105738	SIPA1L3	signal induced proliferation associated 1 like 3	chr19	-1.29441	6.90189	0.0258199
ENSG00000142208	AKT1	AKT serine/threonine kinase 1	chr14	1.27031	8.11484	0.0268408
ENSG00000087253	LPCAT2	lysophosphatidylcholine acyltransferase 2	chr16	1.46298	6.94312	0.027153
ENSG00000101412	E2F1	E2F transcription factor 1	chr20	1.37519	6.843	0.0285064
ENSG00000112280	COL9A1	collagen type IX alpha 1 chain	chr6	1.38149	7.16928	0.0287047
ENSG00000102034	ELF4	E74 like ETS transcription factor 4	chrX	1.3517	6.61942	0.0287047
ENSG00000135441	BLOC1S1	biogenesis of lysosomal organelles complex 1 subunit 1	chr12	1.34295	7.10949	0.0289207
ENSG00000147852	VLDLR	very low density lipoprotein receptor	chr9	1.35003	7.2769	0.0298683
ENSG00000214491	SEC14L6	SEC14 like lipid binding 6	chr22	-1.26294	6.59083	0.030777
ENSG00000088882	CPXM1	carboxypeptidase X, M14 family member 1	chr20	-1.22202	7.59205	0.0310088
ENSG00000240972	MIF	macrophage migration inhibitory factor (glycosylation-inhibiting factor)	chr22	-1.21125	6.69443	0.0311912
ENSG00000132613	MTSS1L	MTSS1L, I-BAR domain containing	chr16	1.2999	7.40717	0.0312579
ENSG00000237248	LINC00987	long intergenic non-protein coding RNA 987	NA	-1.08875	6.56795	0.0313084
ENSG00000006468	ETV1	ETS variant 1	chr7	1.34344	7.09556	0.0320905
ENSG00000063244	U2AF2	U2 small nuclear RNA auxiliary factor 2	chr19	1.28702	7.70952	0.0328003
ENSG00000064932	SBNO2	strawberry notch homolog 2	chr19	1.3501	7.06389	0.0331346
ENSG00000178081	ULK4P3	ULK4 pseudogene 3	NA	1.34103	6.78371	0.033415
ENSG00000129422	MTUS1	microtubule associated scaffold protein 1	chr8	-1.17129	6.56916	0.033497
ENSG00000103152	MPG	N-methylpurine DNA glycosylase	chr16	1.29171	7.16978	0.034903
ENSG00000065328	MCM10	minichromosome maintenance 10 replication initiation factor	chr10	1.4316	7.05721	0.0362408
ENSG00000104998	IL27RA	interleukin 27 receptor subunit alpha	chr19	-1.3458	6.917	0.0363126
ENSG00000177359	OVOS2	ovostatin 2	NA	1.21736	6.6837	0.0366569
ENSG00000162998	FRZB	frizzled-related protein	chr2	-1.32626	6.88338	0.0367909
ENSG00000135070	ISCA1	iron-sulfur cluster assembly 1	chr9	-1.24193	6.68151	0.0390453
ENSG00000144218	AFF3	AF4/FMR2 family member 3	chr2	-1.29497	6.74597	0.03925
ENSG00000154127	UBASH3B	ubiquitin associated and SH3 domain containing B	chr11	-1.2424	6.62751	0.0396467
ENSG00000219451	RPL23P8	ribosomal protein L23 pseudogene 8	NA	-1.19168	6.80923	0.0396467
ENSG00000117266	CDK18	cyclin dependent kinase 18	chr1	1.32346	6.92645	0.039789
ENSG00000154654	NCAM2	neural cell adhesion molecule 2	chr21	1.08066	6.56204	0.0399778
ENSG00000144366	GULP1	GULP, engulfment adaptor PTB domain containing 1	chr2	1.269	7.69842	0.0405861
ENSG00000175567	UCP2	uncoupling protein 2	chr11	1.29109	7.65827	0.0421365
ENSG00000108379	LOC101929777	uncharacterized LOC101929777	NA	-1.36415	6.73579	0.0421365
ENSG00000136104	RNASEH2B	ribonuclease H2 subunit B	chr13	1.30579	6.87572	0.0421365
ENSG00000176845	METRNL	meteorin like, glial cell differentiation regulator	chr17	-1.2884	6.7052	0.0424869
ENSG00000185339	TCN2	transcobalamin 2	chr22	-1.31106	6.67954	0.0427116
ENSG00000148908	RGS10	regulator of G-protein signaling 10	chr10	1.05382	6.56886	0.0429396
ENSG00000117298	ECE1	endothelin converting enzyme 1	chr1	-1.25182	7.2369	0.0433503
ENSG00000136014	USP44	ubiquitin specific peptidase 44	chr12	-1.11985	6.6	0.0438138
ENSG00000151468	CCDC3	coiled-coil domain containing 3	chr10	1.23865	6.68689	0.0441319
ENSG00000172936	MYD88	myeloid differentiation primary response 88	chr3	1.50277	6.92619	0.0442127
ENSG00000102271	KLHL4	kelch like family member 4	chrX	-1.26524	6.65654	0.0450329
ENSG00000133943	C14orf159	chromosome 14 open reading frame 159	chr14	-1.29084	6.81151	0.0467269
ENSG00000113916	BCL6	B-cell CLL/lymphoma 6	chr3	1.31403	7.11246	0.047308
ENSG00000163898	LIPH	lipase H	chr3	-1.13399	6.57252	0.0473572
ENSG00000075420	FNDC3B	fibronectin type III domain containing 3B	chr3	-1.24884	7.60881	0.0488278
ENSG00000180263	FGD6	FYVE, RhoGEF and PH domain containing 6	chr12	-1.30277	7.11683	0.0488278
ENSG00000124762	CDKN1A	cyclin dependent kinase inhibitor 1A	chr6	1.41888	8.1936	0.0497853
SIGNIFICANCE LIMIT
ENSG00000126709	IFI6	interferon alpha inducible protein 6	chr1	-1.27677	7.04472	0.0501332
ENSG00000142669	SH3BGRL3	SH3 domain binding glutamate rich protein like 3	chr1	-1.28183	7.94024	0.0506368
ENSG00000131080	EDA2R	ectodysplasin A2 receptor	chrX	1.4024	6.81959	0.0507429
ENSG00000104976	SNAPC2	small nuclear RNA activating complex polypeptide 2	chr19	1.35973	7.34752	0.0540414
ENSG00000088826	SMOX	spermine oxidase	chr20	1.2633	6.81673	0.0540414
ENSG00000184144	CNTN2	contactin 2	chr1	1.30248	6.70408	0.0550474
ENSG00000178980	SELENOW	selenoprotein W	chr19	1.23618	7.99797	0.0557946
ENSG00000138759	FRAS1	Fraser extracellular matrix complex subunit 1	chr4	-1.29765	6.91972	0.0566096
ENSG00000132535	DLG4	discs large MAGUK scaffold protein 4	chr17	-1.18563	6.7264	0.0570649
ENSG00000129675	ARHGEF6	Rac/Cdc42 guanine nucleotide exchange factor 6	chrX	1.27547	6.76305	0.0571003
ENSG00000099282	TSPAN15	tetraspanin 15	chr10	1.23986	6.74663	0.0572796
ENSG00000114790	ARHGEF26	Rho guanine nucleotide exchange factor 26	chr3	1.28128	7.05214	0.0577207
ENSG00000173334	TRIB1	tribbles pseudokinase 1	chr8	1.27107	6.68992	0.0578694
ENSG00000197757	HOXC6	homeobox C6	chr12	-1.27446	7.7087	0.0596913
ENSG00000123485	HJURP	Holliday junction recognition protein	chr2	1.45941	7.29631	0.0599353
ENSG00000157064	NMNAT2	nicotinamide nucleotide adenylyltransferase 2	chr1	-1.11438	6.56044	0.0616129
ENSG00000165025	SYK	spleen associated tyrosine kinase	chr9	1.30107	6.8486	0.0648391
ENSG00000077150	NFKB2	nuclear factor kappa B subunit 2	chr10	1.27579	6.8625	0.0661281
ENSG00000120093	HOXB3	homeobox B3	chr17	-1.25333	7.71169	0.0667458
ENSG00000165269	AQP7	aquaporin 7	chr9	0.91216	6.53727	0.0674812
ENSG00000113580	NR3C1	nuclear receptor subfamily 3 group C member 1	chr5	-1.26081	6.9224	0.0685778
ENSG00000164068	RNF123	ring finger protein 123	chr3	1.32301	7.38815	0.0695445
ENSG00000164211	STARD4	StAR related lipid transfer domain containing 4	chr5	-1.23762	7.7365	0.0708398
ENSG00000171604	CXXC5	CXXC finger protein 5	chr5	-1.22321	7.78891	0.0711655
ENSG00000146376	ARHGAP18	Rho GTPase activating protein 18	chr6	1.30345	6.92611	0.0711655
ENSG00000153721	CNKSR3	CNKSR family member 3	chr6	-1.22666	6.85711	0.0719848
ENSG00000109099	PMP22	peripheral myelin protein 22	chr17	1.31083	7.052	0.0720133
ENSG00000177606	JUN	Jun proto-oncogene, AP-1 transcription factor subunit	chr1	1.35317	7.38888	0.0722461
ENSG00000137872	SEMA6D	semaphorin 6D	chr15	-1.43531	6.77387	0.0722461
ENSG00000102383	ZDHHC15	zinc finger DHHC-type containing 15	chrX	-1.09379	6.56391	0.0726966
ENSG00000260128	ULK4P2	ULK4 pseudogene 2	NA	1.28145	6.7783	0.072885
ENSG00000135299	ANKRD6	ankyrin repeat domain 6	chr6	-1.18884	6.6797	0.0736459
ENSG00000139211	AMIGO2	adhesion molecule with Ig like domain 2	chr12	1.21667	6.66342	0.0746219
ENSG00000143653	SCCPDH	saccharopine dehydrogenase (putative)	chr1	1.234	7.5556	0.0746219
ENSG00000185818	NAT8L	N-acetyltransferase 8 like	chr4	1.18382	6.68654	0.0760185
ENSG00000166619	BLCAP	bladder cancer associated protein	chr20	-1.24216	6.88597	0.0760748
ENSG00000182310	SPACA6	sperm acrosome associated 6	NA	-1.05842	6.56676	0.0762505
ENSG00000106236	NPTX2	neuronal pentraxin 2	chr7	-1.1595	6.56807	0.0768315
ENSG00000104313	EYA1	EYA transcriptional coactivator and phosphatase 1	chr8	-1.19248	6.63103	0.0769556
ENSG00000117691	NENF	neudesin neurotrophic factor	chr1	1.25552	6.97411	0.0769556
ENSG00000196376	SLC35F1	solute carrier family 35 member F1	chr6	1.24874	7.40616	0.0773431
ENSG00000166833	NAV2	neuron navigator 2	chr11	-1.2684	6.97091	0.0773769
ENSG00000070950	RAD18	RAD18, E3 ubiquitin protein ligase	chr3	1.29204	6.96331	0.0784381
ENSG00000005100	DHX33	DEAH-box helicase 33	chr17	1.29055	7.34802	0.0785718
ENSG00000203485	INF2	inverted formin, FH2 and WH2 domain containing	chr14	1.24026	7.34156	0.0786072
ENSG00000166508	MCM7	minichromosome maintenance complex component 7	chr7	1.26071	8.16668	0.0786651
ENSG00000109738	GLRB	glycine receptor beta	chr4	1.19629	6.6485	0.0798509
ENSG00000148948	LRRC4C	leucine rich repeat containing 4C	chr11	1.37516	6.78859	0.0802841
ENSG00000113356	POLR3G	RNA polymerase III subunit G	chr5	1.30112	6.81949	0.0802841
ENSG00000155849	ELMO1	engulfment and cell motility 1	chr7	-1.16656	6.62494	0.0803023
ENSG00000111783	RFX4	regulatory factor X4	chr12	-1.39626	6.82449	0.0808979
ENSG00000197959	DNM3	dynamin 3	chr1	1.33275	6.77265	0.0809402
ENSG00000111371	SLC38A1	solute carrier family 38 member 1	chr12	-1.2341	7.7474	0.0813677
ENSG00000006210	CX3CL1	C-X3-C motif chemokine ligand 1	chr16	-1.15909	6.58074	0.0826394
ENSG00000123080	CDKN2C	cyclin dependent kinase inhibitor 2C	chr1	1.15714	6.59535	0.0835551
ENSG00000164292	RHOBTB3	Rho related BTB domain containing 3	chr5	1.18809	8.71004	0.0839726
ENSG00000064666	CNN2	calponin 2	chr19	-1.20692	7.97204	0.0843672
ENSG00000203727	SAMD5	sterile alpha motif domain containing 5	chr6	1.27881	6.70756	0.0847847
ENSG00000105939	ZC3HAV1	zinc finger CCCH-type containing, antiviral 1	chr7	1.36709	7.27499	0.0849042
ENSG00000170421	KRT8	keratin 8	chr12	-1.10574	6.56846	0.0871183
ENSG00000182957	SPATA13	spermatogenesis associated 13	chr13	1.27165	7.22381	0.0874249
ENSG00000008277	ADAM22	ADAM metallopeptidase domain 22	chr7	1.26603	6.67127	0.0884081
ENSG00000108947	EFNB3	ephrin B3	chr17	-1.25353	7.3489	0.0895692
ENSG00000136002	ARHGEF4	Rho guanine nucleotide exchange factor 4	chr2	-0.998802	6.55996	0.0895692
ENSG00000179954	SSC5D	scavenger receptor cysteine rich family member with 5 domains	chr19	-1.1013	6.56815	0.0897328
ENSG00000242732	RTL5	retrotransposon Gag like 5	chrX	-1.00511	6.55566	0.0904162
ENSG00000154760	SLFN13	schlafen family member 13	chr17	-1.11898	6.56294	0.0924263
ENSG00000035687	ADSS	adenylosuccinate synthase	chr1	1.2213	7.56394	0.0938306
ENSG00000117480	FAAH	fatty acid amide hydrolase	chr1	1.26391	6.75692	0.0938306
ENSG00000175334	BANF1	barrier to autointegration factor 1	chr11	1.23005	7.44853	0.0938343
ENSG00000104738	MCM4	minichromosome maintenance complex component 4	chr8	1.33663	7.51113	0.0941035
ENSG00000167642	SPINT2	serine peptidase inhibitor, Kunitz type 2	chr19	1.36903	6.78739	0.0942203
ENSG00000132694	ARHGEF11	Rho guanine nucleotide exchange factor 11	chr1	1.25736	7.66149	0.0942762
ENSG00000234899	LOC102723517	uncharacterized LOC102723517	NA	-1.05438	6.58177	0.0942762
ENSG00000187098	MITF	melanogenesis associated transcription factor	chr3	1.22395	6.67078	0.0951187
ENSG00000126705	AHDC1	AT-hook DNA binding motif containing 1	chr1	-1.19241	7.864	0.0952056
ENSG00000130529	TRPM4	transient receptor potential cation channel subfamily M member 4	chr19	-1.05116	6.57954	0.0988365
ENSG00000186635	ARAP1	ArfGAP with RhoGAP domain, ankyrin repeat and PH domain 1	chr11	1.22412	7.08364	0.0988365
ENSG00000019144	MIR6716	microRNA 6716	NA	1.21434	7.8278	0.0995185
ENSG00000150625	GPM6A	glycoprotein M6A	chr4	-1.21541	7.14548	0.0995185
ENSG00000144645	OSBPL10	oxysterol binding protein like 10	chr3	1.28437	7.1515	0.100034
ENSG00000196353	CPNE4	copine 4	chr3	-0.969071	6.55767	0.10211
ENSG00000181467	RAP2B	RAP2B, member of RAS oncogene family	chr3	1.29591	7.49006	0.102621
ENSG00000100297	MCM5	minichromosome maintenance complex component 5	chr22	1.31475	7.38776	0.102932
ENSG00000205593	DENND6B	DENN domain containing 6B	chr22	-0.971482	6.54931	0.105051
ENSG00000182583	VCX	variable charge, X-linked	chrX	1.1829	6.78586	0.105051
ENSG00000100592	DAAM1	dishevelled associated activator of morphogenesis 1	chr14	-1.22195	7.31888	0.105467
ENSG00000154153	RETREG1	reticulophagy regulator 1	chr5	1.0162	6.57193	0.105467
ENSG00000175305	CCNE2	cyclin E2	chr8	1.25894	6.71982	0.107617
ENSG00000124588	NQO2	N-ribosyldihydronicotinamide:quinone reductase 2	chr6	-1.24559	6.85721	0.107617
ENSG00000196843	ARID5A	AT-rich interaction domain 5A	chr2	1.05193	6.59663	0.107617
ENSG00000154556	SORBS2	sorbin and SH3 domain containing 2	chr4	-1.22072	7.62231	0.108239
ENSG00000160781	PAQR6	progestin and adipoQ receptor family member 6	chr1	1.26229	6.86737	0.110866
ENSG00000102349	KLF8	Kruppel like factor 8	chrX	-1.23583	6.6703	0.112376
ENSG00000109466	KLHL2	kelch like family member 2	chr4	1.27092	6.78252	0.115377
ENSG00000161980	POLR3K	RNA polymerase III subunit K	chr16	1.24967	6.75468	0.116413
ENSG00000105723	GSK3A	glycogen synthase kinase 3 alpha	chr19	1.22454	7.75135	0.117219
ENSG00000182118	MIR1182	microRNA 1182	NA	1.21673	6.78002	0.117373
ENSG00000125454	SLC25A19	solute carrier family 25 member 19	chr17	1.03513	6.59072	0.118732
ENSG00000183828	NUDT14	nudix hydrolase 14	chr14	0.989731	6.56246	0.118732
ENSG00000185189	MIR6845	microRNA 6845	NA	1.25243	7.82721	0.120004
ENSG00000169241	SLC50A1	solute carrier family 50 member 1	chr1	-1.124	6.79897	0.121905
ENSG00000054654	SYNE2	spectrin repeat containing nuclear envelope protein 2	chr14	1.19571	8.61481	0.122168
ENSG00000169231	THBS3	thrombospondin 3	chr1	-1.19084	6.84748	0.123011
ENSG00000242498	ARPIN	actin-related protein 2/3 complex inhibitor	chr15	1.31216	6.96942	0.123121
ENSG00000180884	ZNF792	zinc finger protein 792	chr19	1.17561	6.63457	0.123121
ENSG00000104205	SGK3	serum/glucocorticoid regulated kinase family member 3	chr8	1.13482	6.6454	0.12344
ENSG00000176406	RIMS2	regulating synaptic membrane exocytosis 2	chr8	1.29779	6.82121	0.123503
ENSG00000196839	ADA	adenosine deaminase	chr20	-1.1362	6.61446	0.124213
ENSG00000258102	MAP1LC3B2	microtubule associated protein 1 light chain 3 beta 2	chr12	-1.15793	6.63176	0.124504
ENSG00000143368	SF3B4	splicing factor 3b subunit 4	chr1	1.20972	8.04441	0.125816
ENSG00000196517	SLC6A9	solute carrier family 6 member 9	chr1	-1.22595	6.75431	0.126028
ENSG00000122359	ANXA11	annexin A11	chr10	1.21148	7.6599	0.128838
ENSG00000150995	ITPR1	inositol 1,4,5-trisphosphate receptor type 1	chr3	-1.10647	6.63365	0.128944
ENSG00000122863	CHST3	carbohydrate sulfotransferase 3	chr10	1.24285	7.12529	0.129581
ENSG00000255200	PGAM1P8	phosphoglycerate mutase 1 pseudogene 8	NA	-1.1605	7.01867	0.129581
ENSG00000105298	CACTIN	cactin, spliceosome C complex subunit	chr19	1.24981	7.00293	0.135348
ENSG00000065154	OAT	ornithine aminotransferase	chr10	1.22127	7.09512	0.137096
ENSG00000116711	PLA2G4A	phospholipase A2 group IVA	chr1	1.24576	6.93874	0.140203
ENSG00000222041	CYTOR	cytoskeleton regulator RNA	NA	-0.977354	6.55343	0.140203
ENSG00000163735	CXCL5	C-X-C motif chemokine ligand 5	chr4	-1.03793	6.59834	0.140686
ENSG00000119280	C1orf198	chromosome 1 open reading frame 198	chr1	1.19674	7.76003	0.143332
ENSG00000197857	ZNF44	zinc finger protein 44	chr19	-1.09942	6.65738	0.143332
ENSG00000144619	CNTN4	contactin 4	chr3	-1.25268	6.7292	0.144703
ENSG00000229243	LINC01981	long intergenic non-protein coding RNA 1981	NA	-1.03723	6.58465	0.145809
ENSG00000076716	GPC4	glypican 4	chrX	1.20025	6.86831	0.149111
ENSG00000161040	FBXL13	F-box and leucine rich repeat protein 13	chr7	-0.976027	6.57244	0.153001
ENSG00000189057	FAM111B	family with sequence similarity 111 member B	chr11	1.24547	6.81542	0.156262
ENSG00000197301	LOC100129940	uncharacterized LOC100129940	NA	1.14324	6.70076	0.157172
ENSG00000110400	NECTIN1	nectin cell adhesion molecule 1	chr11	-1.25474	6.98634	0.157996
ENSG00000130193	THEM6	thioesterase superfamily member 6	chr8	1.19896	6.76902	0.159777
ENSG00000225361	PPP1R26-AS1	PPP1R26 antisense RNA 1	NA	-0.929088	6.54409	0.161409
ENSG00000158023	WDR66	WD repeat domain 66	chr12	-0.947137	6.54902	0.161836
ENSG00000006071	ABCC8	ATP binding cassette subfamily C member 8	chr11	1.0121	6.57643	0.161902
ENSG00000175536	LIPT2	lipoyl(octanoyl) transferase 2 (putative)	chr11	1.00321	6.57661	0.162367
ENSG00000137760	ALKBH8	alkB homolog 8, tRNA methyltransferase	chr11	1.10233	6.62846	0.163818
ENSG00000138801	PAPSS1	3'-phosphoadenosine 5'-phosphosulfate synthase 1	chr4	1.1649	8.13203	0.164228
ENSG00000051180	RAD51	RAD51 recombinase	chr15	1.21872	6.77616	0.167231
ENSG00000132681	ATP1A4	ATPase Na+/K+ transporting subunit alpha 4	chr1	-0.951556	6.54942	0.16768
ENSG00000158125	XDH	xanthine dehydrogenase	chr2	-0.990083	6.55715	0.169603
ENSG00000153956	CACNA2D1	calcium voltage-gated channel auxiliary subunit alpha2delta 1	chr7	-1.19662	7.22113	0.170628
ENSG00000151725	CENPU	centromere protein U	chr4	1.21158	7.04372	0.171269
ENSG00000171574	ZNF584	zinc finger protein 584	chr19	-1.14951	6.67006	0.172065
ENSG00000139597	N4BP2L1	NEDD4 binding protein 2 like 1	chr13	1.14172	6.71827	0.173168
ENSG00000113532	ST8SIA4	ST8 alpha-N-acetyl-neuraminide alpha-2,8-sialyltransferase 4	chr5	-1.18536	6.71561	0.176829
ENSG00000165300	SLITRK5	SLIT and NTRK like family member 5	chr13	-1.1954	7.53868	0.179341
ENSG00000196586	MYO6	myosin VI	chr6	1.19257	8.09557	0.18267
ENSG00000187068	C3orf70	chromosome 3 open reading frame 70	chr3	1.17916	6.74027	0.1835
ENSG00000261221	ZNF865	zinc finger protein 865	chr19	-1.06672	6.6632	0.1835
ENSG00000188647	PTAR1	protein prenyltransferase alpha subunit repeat containing 1	chr9	1.17405	7.91544	0.183708
ENSG00000205730	ITPRIPL2	inositol 1,4,5-trisphosphate receptor interacting protein like 2	chr16	1.21838	7.00729	0.188374
ENSG00000241852	C8orf58	chromosome 8 open reading frame 58	chr8	-1.10686	6.69161	0.189959
ENSG00000196776	CD47	CD47 molecule	chr3	1.16775	7.97469	0.192438
ENSG00000158201	ABHD3	abhydrolase domain containing 3	chr18	1.22104	7.01325	0.194065
ENSG00000183780	SLC35F3	solute carrier family 35 member F3	chr1	0.973818	6.58716	0.194551
ENSG00000151967	SCHIP1	schwannomin interacting protein 1	chr3	1.02545	6.594	0.199358
ENSG00000156345	CDK20	cyclin dependent kinase 20	chr9	-1.14879	6.73848	0.199358
ENSG00000172717	FAM71D	family with sequence similarity 71 member D	chr14	1.16979	7.68206	0.199526
ENSG00000010278	CD9	CD9 molecule	chr12	1.14331	6.75934	0.199526
ENSG00000206538	VGLL3	vestigial like family member 3	chr3	-0.971325	6.56315	0.203904
ENSG00000185942	NKAIN3	sodium/potassium transporting ATPase interacting 3	chr8	1.02518	6.60473	0.204611
ENSG00000169783	LINGO1	leucine rich repeat and Ig domain containing 1	chr15	-1.21452	7.15285	0.205493
ENSG00000011105	TSPAN9	tetraspanin 9	chr12	1.07896	6.71485	0.207428
ENSG00000171488	LRRC8C	leucine rich repeat containing 8 family member C	chr1	1.19463	6.68987	0.207653
ENSG00000119771	KLHL29	kelch like family member 29	chr2	1.06958	6.65636	0.209619
ENSG00000163975	MELTF	melanotransferrin	chr3	1.11909	6.67385	0.212475
ENSG00000235244	DANT2	DXZ4 associated non-coding transcript 2, distal	NA	-1.10978	6.69507	0.212874
ENSG00000138792	ENPEP	glutamyl aminopeptidase	chr4	1.11679	6.64454	0.214453
ENSG00000184678	HIST2H2BE	histone cluster 2 H2B family member e	chr1	-0.947271	6.55607	0.215467
ENSG00000178467	P4HTM	prolyl 4-hydroxylase, transmembrane	chr3	-1.01474	6.60808	0.217171
ENSG00000171004	HS6ST2	heparan sulfate 6-O-sulfotransferase 2	chrX	-1.11772	6.7642	0.217171
ENSG00000277161	PIGW	phosphatidylinositol glycan anchor biosynthesis class W	chr17	0.836732	6.54215	0.217405
ENSG00000092758	COL9A3	collagen type IX alpha 3 chain	chr20	-1.24371	7.15417	0.217612
ENSG00000168297	PXK	PX domain containing serine/threonine kinase like	chr3	-1.0276	6.58731	0.218455
ENSG00000144369	FAM171B	family with sequence similarity 171 member B	chr2	-1.20804	6.94927	0.219037
ENSG00000204388	HSPA1B	heat shock protein family A (Hsp70) member 1B	chr6_dbb_hap3	-1.01548	6.59611	0.223002
ENSG00000115652	UXS1	UDP-glucuronate decarboxylase 1	chr2	-1.17508	7.20174	0.227137
ENSG00000138193	PLCE1	phospholipase C epsilon 1	chr10	1.0551	6.64638	0.227137
ENSG00000104897	SF3A2	splicing factor 3a subunit 2	chr19	1.13197	7.20565	0.227137
ENSG00000164465	DCBLD1	discoidin, CUB and LCCL domain containing 1	chr6	1.09443	6.71735	0.23171
ENSG00000246090	LOC100507053	uncharacterized LOC100507053	NA	-0.947289	6.55531	0.23171
ENSG00000158301	ARMCX5-GPRASP2	ARMCX5-GPRASP2 readthrough	chrX	-1.14651	6.76123	0.234353
ENSG00000231925	TAPBP	TAP binding protein	chr6_dbb_hap3	-1.14428	6.88006	0.238319
ENSG00000155760	FZD7	frizzled class receptor 7	chr2	-1.17709	7.24337	0.241493
ENSG00000183248	PRR36	proline rich 36	chr19	1.17915	7.0935	0.242688
ENSG00000188783	PRELP	proline and arginine rich end leucine rich repeat protein	chr1	1.21993	7.14229	0.249398
ENSG00000228109	MELTF-AS1	MELTF antisense RNA 1	NA	1.03022	6.60701	0.251477
ENSG00000143320	CRABP2	cellular retinoic acid binding protein 2	chr1	1.12093	9.88767	0.25152
ENSG00000171130	ATP6V0E2	ATPase H+ transporting V0 subunit e2	chr7	1.15157	7.28029	0.25152
ENSG00000181915	ADO	2-aminoethanethiol dioxygenase	chr10	1.18208	7.40951	0.25355
ENSG00000188227	ZNF793	zinc finger protein 793	chr19	-1.14249	6.80635	0.25355
ENSG00000111817	DSE	dermatan sulfate epimerase	chr6	-1.1142	6.83263	0.259132
ENSG00000130066	SAT1	spermidine/spermine N1-acetyltransferase 1	chrX	1.18106	7.2964	0.259557
ENSG00000167749	KLK4	kallikrein related peptidase 4	chr19	1.25696	6.76409	0.262534
ENSG00000167904	TMEM68	transmembrane protein 68	chr8	1.17473	6.98994	0.265008
ENSG00000197558	SSPO	SCO-spondin	chr7	-1.08698	6.66599	0.265008
ENSG00000171310	CHST11	carbohydrate sulfotransferase 11	chr12	-1.10536	6.67141	0.266278
ENSG00000163565	IFI16	interferon gamma inducible protein 16	chr1	1.15984	6.82734	0.269167
ENSG00000168702	LRP1B	LDL receptor related protein 1B	chr2	-0.966393	6.57393	0.27236
ENSG00000278189	LOC100008587	RNA, 5.8S ribosomal	NA	-1.17435	7.0923	0.274635
ENSG00000142632	ARHGEF19	Rho guanine nucleotide exchange factor 19	chr1	0.915073	6.59098	0.277252
ENSG00000204634	TBC1D8	TBC1 domain family member 8	chr2	-1.02499	6.66435	0.277893
ENSG00000217555	CKLF	chemokine like factor	chr16	1.04657	6.6918	0.28421
ENSG00000172432	GTPBP2	GTP binding protein 2	chr6	1.16512	7.26171	0.284918
ENSG00000106006	HOXA6	homeobox A6	chr7	-1.18953	7.16775	0.28702
ENSG00000113119	TMCO6	transmembrane and coiled-coil domains 6	chr5	1.03401	6.63576	0.287508
ENSG00000173698	ADGRG2	adhesion G protein-coupled receptor G2	chrX	1.13241	6.69416	0.288607
ENSG00000122386	ZNF205	zinc finger protein 205	chr16	-1.0118	6.62242	0.29687
ENSG00000145882	PCYOX1L	prenylcysteine oxidase 1 like	chr5	1.16986	6.92299	0.297949
ENSG00000132661	NXT1	nuclear transport factor 2 like export factor 1	chr20	1.09692	6.75315	0.301689
ENSG00000103326	CAPN15	calpain 15	chr16	1.18269	7.10155	0.309961
ENSG00000059377	TBXAS1	thromboxane A synthase 1	chr7	-0.80991	6.53229	0.309961
ENSG00000272150	NBPF25P	NBPF member 25, pseudogene	NA	-1.08909	7.25515	0.310259
ENSG00000172965	MIR4435-2HG	MIR4435-2 host gene	NA	-0.983916	6.59346	0.311009
ENSG00000184588	PDE4B	phosphodiesterase 4B	chr1	-0.822707	6.53108	0.311418
ENSG00000158042	MRPL17	mitochondrial ribosomal protein L17	chr11	1.12058	6.84548	0.315038
ENSG00000139433	GLTP	glycolipid transfer protein	chr12	1.14856	7.56941	0.317404
ENSG00000127423	AUNIP	aurora kinase A and ninein interacting protein	chr1	0.892416	6.57192	0.317404
ENSG00000171408	PDE7B	phosphodiesterase 7B	chr6	1.0233	6.62241	0.318086
ENSG00000128833	MYO5C	myosin VC	chr15	-1.02811	6.59249	0.319623
ENSG00000092051	JPH4	junctophilin 4	chr14	-1.19565	7.10431	0.320621
ENSG00000198932	GPRASP1	G protein-coupled receptor associated sorting protein 1	chrX	-1.09901	6.68023	0.320621
ENSG00000178878	APOLD1	apolipoprotein L domain containing 1	chr12	-1.16568	6.73368	0.32256
ENSG00000135338	LCA5	LCA5, lebercilin	chr6	1.10663	6.68442	0.32256
ENSG00000265763	ZNF488	zinc finger protein 488	chr10	0.924361	6.58923	0.324574
ENSG00000090447	TFAP4	transcription factor AP-4	chr16	1.03081	6.70267	0.326943
ENSG00000185614	FAM212A	family with sequence similarity 212 member A	chr3	0.795827	6.54324	0.327907
ENSG00000146416	AIG1	androgen induced 1	chr6	-1.12463	6.94119	0.329264
ENSG00000072210	ALDH3A2	aldehyde dehydrogenase 3 family member A2	chr17	1.14694	7.784	0.330452
ENSG00000105997	HOXA3	homeobox A3	chr7	-1.18519	7.14074	0.334116
ENSG00000198429	ZNF69	zinc finger protein 69	chr19	-0.963153	6.61371	0.334274
ENSG00000189362	NEMP2	nuclear envelope integral membrane protein 2	chr2	0.883005	6.57588	0.336869
ENSG00000139266	2009-03-01	membrane associated ring-CH-type finger 9	chr12	1.11995	7.00198	0.341889
ENSG00000261052	LOC105369243	sulfotransferase 1A3	NA	-1.06503	6.70853	0.343104
ENSG00000162599	NFIA	nuclear factor I A	chr1	-1.17536	6.79839	0.344717
ENSG00000152455	SUV39H2	suppressor of variegation 3-9 homolog 2	chr10	1.12444	7.05318	0.345812
ENSG00000277778	PGM5P2	phosphoglucomutase 5 pseudogene 2	NA	0.746817	6.53402	0.349022
ENSG00000153885	KCTD15	potassium channel tetramerization domain containing 15	chr19	1.17323	7.38152	0.352009
ENSG00000146966	DENND2A	DENN domain containing 2A	chr7	-1.09287	7.00171	0.3591
ENSG00000116574	RHOU	ras homolog family member U	chr1	-1.01091	6.6136	0.359323
ENSG00000181026	AEN	apoptosis enhancing nuclease	chr15	1.16422	7.04433	0.360488
ENSG00000121310	ECHDC2	enoyl-CoA hydratase domain containing 2	chr1	0.95569	6.6049	0.361494
ENSG00000100084	HIRA	histone cell cycle regulator	chr22	-0.983457	6.64743	0.361512
ENSG00000240563	L1TD1	LINE1 type transposase domain containing 1	chr1	1.17741	6.88003	0.369193
ENSG00000101911	PRPS2	phosphoribosyl pyrophosphate synthetase 2	chrX	1.16668	6.84067	0.369193
ENSG00000158552	ZFAND2B	zinc finger AN1-type containing 2B	chr2	-1.04723	6.72519	0.376092
ENSG00000148516	ZEB1	zinc finger E-box binding homeobox 1	chr10	-1.13453	7.29098	0.377069
ENSG00000138629	UBL7	ubiquitin like 7	chr15	1.13883	7.23815	0.378236
ENSG00000172379	MIR5572	microRNA 5572	NA	1.1231	7.20711	0.378861
ENSG00000139722	VPS37B	VPS37B, ESCRT-I subunit	chr12	1.1261	7.2625	0.379031
ENSG00000274956	UG0898H09	uncharacterized LOC643763	chr8	1.08811	6.75173	0.380581
ENSG00000102178	UBL4A	ubiquitin like 4A	chrX	1.09985	6.95319	0.396836
ENSG00000132003	ZSWIM4	zinc finger SWIM-type containing 4	chr19	1.16726	6.98763	0.397076
ENSG00000185664	PMEL	premelanosome protein	chr12	-1.18253	6.73377	0.397364
ENSG00000183386	FHL3	four and a half LIM domains 3	chr1	-1.11136	7.00091	0.399601
ENSG00000082014	SMARCD3	SWI/SNF related, matrix associated, actin dependent regulator of chromatin, subfamily d, member 3	chr7	-1.08851	6.94203	0.403435
ENSG00000164930	FZD6	frizzled class receptor 6	chr8	-1.03545	6.70772	0.404744
ENSG00000139182	CLSTN3	calsyntenin 3	chr12	-1.0883	7.00357	0.404744
ENSG00000110104	CCDC86	coiled-coil domain containing 86	chr11	1.16239	7.098	0.405747
ENSG00000150540	HNMT	histamine N-methyltransferase	chr2	-0.953931	6.57876	0.405747
ENSG00000151746	BICD1	BICD cargo adaptor 1	chr12	1.13049	7.37973	0.40598
ENSG00000109265	KIAA1211	KIAA1211	chr4	-1.04549	6.73737	0.40598
ENSG00000072135	PTPN18	protein tyrosine phosphatase, non-receptor type 18	chr2	-0.949755	6.59431	0.408651
ENSG00000197576	HOXA4	homeobox A4	chr7	-1.05151	6.70661	0.416791
ENSG00000148824	MTG1	mitochondrial ribosome associated GTPase 1	chr10	-0.905195	6.59854	0.419192
ENSG00000162337	LRP5	LDL receptor related protein 5	chr11	1.11847	7.15116	0.421102
ENSG00000108518	PFN1	profilin 1	chr17	1.0868	9.10122	0.422764
ENSG00000174099	MSRB3	methionine sulfoxide reductase B3	chr12	-1.07806	6.74846	0.422796
ENSG00000107679	PLEKHA1	pleckstrin homology domain containing A1	chr10	1.11974	7.41601	0.423018
ENSG00000244405	ETV5	ETS variant 5	chr3	1.11587	7.03091	0.423266
ENSG00000257150	PGAM1P5	phosphoglycerate mutase 1 pseudogene 5	NA	0.995541	6.67887	0.428067
ENSG00000223749	MIR424	microRNA 424	NA	-1.06215	6.6441	0.433322
ENSG00000057294	PKP2	plakophilin 2	chr12	0.959493	6.63431	0.433322
ENSG00000136720	HS6ST1	heparan sulfate 6-O-sulfotransferase 1	chr2	-1.10408	6.95271	0.434282
ENSG00000170571	EMB	embigin	chr5	1.13266	7.09059	0.436011
ENSG00000145020	AMT	aminomethyltransferase	chr3	-1.06427	6.76579	0.436011
ENSG00000085117	CD82	CD82 molecule	chr11	-1.01996	6.70463	0.444676
ENSG00000142731	PLK4	polo like kinase 4	chr4	1.14635	7.0264	0.445735
ENSG00000065413	ANKRD44	ankyrin repeat domain 44	chr2	1.07592	6.84537	0.447479
ENSG00000203952	CCDC160	coiled-coil domain containing 160	chrX	-0.931016	6.60646	0.455524
ENSG00000198624	CCDC69	coiled-coil domain containing 69	chr5	-0.766163	6.53336	0.455524
ENSG00000175198	PCCA	propionyl-CoA carboxylase alpha subunit	chr13	-1.10339	7.31481	0.455589
ENSG00000131845	ZNF304	zinc finger protein 304	chr19	-1.04603	6.65287	0.458205
ENSG00000228794	LINC01128	long intergenic non-protein coding RNA 1128	NA	0.836797	6.57033	0.464345
ENSG00000162490	DRAXIN	dorsal inhibitory axon guidance protein	chr1	-0.879686	6.56893	0.467974
ENSG00000139645	ANKRD52	ankyrin repeat domain 52	chr12	1.11204	7.16449	0.472687
ENSG00000165152	TMEM246	transmembrane protein 246	chr9	-1.03134	6.74188	0.472981
ENSG00000064687	ABCA7	ATP binding cassette subfamily A member 7	chr19	-0.888959	6.57705	0.474644
ENSG00000085563	ABCB1	ATP binding cassette subfamily B member 1	chr7	1.04457	6.7568	0.480388
ENSG00000142733	MAP3K6	mitogen-activated protein kinase kinase kinase 6	chr1	-1.04713	6.73387	0.480388
ENSG00000118946	PCDH17	protocadherin 17	chr13	-0.964789	6.58285	0.482006
ENSG00000196352	CD55	CD55 molecule (Cromer blood group)	chr1	0.912765	6.5924	0.484281
ENSG00000275591	XKR5	XK related 5	chr8	0.867909	6.57393	0.484281
ENSG00000146242	TPBG	trophoblast glycoprotein	chr6	-1.05288	6.78175	0.485002
ENSG00000157110	RBPMS	RNA binding protein with multiple splicing	chr8	1.10192	7.25885	0.486249
ENSG00000165244	ZNF367	zinc finger protein 367	chr9	0.96594	6.67029	0.48815
ENSG00000275110	MIR6087	microRNA 6087	NA	1.01166	6.80324	0.48815
ENSG00000118689	FOXO3	forkhead box O3	chr6	1.08029	8.30599	0.492137
ENSG00000103942	HOMER2	homer scaffolding protein 2	chr15	0.901804	6.61501	0.497907
ENSG00000167670	CHAF1A	chromatin assembly factor 1 subunit A	chr19	1.13016	7.19679	0.498454
ENSG00000185432	METTL7A	methyltransferase like 7A	chr12	-1.11944	6.96853	0.49854
ENSG00000130147	SH3BP4	SH3 domain binding protein 4	chr2	-1.13858	7.26885	0.50064
ENSG00000189184	PCDH18	protocadherin 18	chr4	-1.11554	7.2299	0.501654
ENSG00000160963	COL26A1	collagen type XXVI alpha 1 chain	chr7	-1.06344	6.846	0.501654
ENSG00000126814	TRMT5	tRNA methyltransferase 5	chr14	-1.06642	7.078	0.501654
ENSG00000116329	OPRD1	opioid receptor delta 1	chr1	0.928073	6.62589	0.503136
ENSG00000269293	ZSCAN16-AS1	ZSCAN16 antisense RNA 1	chr6	0.964338	6.66192	0.503471
ENSG00000077348	EXOSC5	exosome component 5	chr19	0.746668	6.55172	0.509583
ENSG00000134013	LOXL2	lysyl oxidase like 2	chr8	-1.10267	6.93531	0.509819
ENSG00000153317	ASAP1	ArfGAP with SH3 domain, ankyrin repeat and PH domain 1	chr8	1.09256	8.47198	0.515983
ENSG00000164105	SAP30	Sin3A associated protein 30	chr4	1.06239	6.95405	0.515983
ENSG00000145506	NKD2	naked cuticle homolog 2	chr5	-0.872727	6.56044	0.51682
ENSG00000273344	PAXIP1-AS1	PAXIP1 antisense RNA 1 (head to head)	chr7	1.09496	6.79231	0.519762
ENSG00000139625	MAP3K12	mitogen-activated protein kinase kinase kinase 12	chr12	-1.07321	8.00644	0.519762
ENSG00000124440	HIF3A	hypoxia inducible factor 3 alpha subunit	chr19	-0.980094	6.68743	0.520305
ENSG00000020922	MRE11	MRE11 homolog, double strand break repair nuclease	chr11	1.10646	7.19006	0.523346
ENSG00000183150	GPR19	G protein-coupled receptor 19	chr12	-0.986813	6.64515	0.525027
ENSG00000183044	ABAT	4-aminobutyrate aminotransferase	chr16	-1.11358	7.15589	0.528074
ENSG00000224310	LINC01567	long intergenic non-protein coding RNA 1567	NA	0.651074	6.52361	0.532814
ENSG00000099810	MTAP	methylthioadenosine phosphorylase	chr9	1.09157	7.60359	0.536137
ENSG00000156990	RPUSD3	RNA pseudouridylate synthase domain containing 3	chr3	1.12533	7.52763	0.536335
ENSG00000136378	ADAMTS7	ADAM metallopeptidase with thrombospondin type 1 motif 7	chr15	1.1153	7.787	0.536577
ENSG00000168672	FAM84B	family with sequence similarity 84 member B	chr8	-1.05087	6.67422	0.536637
ENSG00000130635	COL5A1	collagen type V alpha 1 chain	chr9	-1.10733	7.1578	0.54544
ENSG00000170160	CCDC144A	coiled-coil domain containing 144A	chr17	0.989434	6.72197	0.54544
ENSG00000181322	NME9	NME/NM23 family member 9	chr3	-0.817252	6.55824	0.54544
ENSG00000153558	FBXL2	F-box and leucine rich repeat protein 2	chr3	-1.0559	6.89086	0.54544
ENSG00000196141	SPATS2L	spermatogenesis associated serine rich 2 like	chr2	-0.994393	6.67218	0.547785
ENSG00000044524	EPHA3	EPH receptor A3	chr3	-1.00941	6.6688	0.552809
ENSG00000185483	ROR1	receptor tyrosine kinase like orphan receptor 1	chr1	1.08734	7.16062	0.555736
ENSG00000099219	ERMP1	endoplasmic reticulum metallopeptidase 1	chr9	-1.06277	6.88712	0.558188
ENSG00000138829	FBN2	fibrillin 2	chr5	-1.08201	7.37004	0.561395
ENSG00000158805	ZNF276	zinc finger protein 276	chr16	1.08183	7.07741	0.561438
ENSG00000213075	RPL31P11	ribosomal protein L31 pseudogene 11	NA	0.801547	6.58767	0.561793
ENSG00000204519	ZNF551	zinc finger protein 551	chr19	1.08121	6.85958	0.562801
ENSG00000134253	TRIM45	tripartite motif containing 45	chr1	-1.07083	6.83414	0.562801
ENSG00000130413	STK33	serine/threonine kinase 33	chr11	-1.00623	6.70412	0.563308
ENSG00000161791	FMNL3	formin like 3	chr12	1.09306	7.19457	0.56518
ENSG00000145721	LIX1	limb and CNS expressed 1	chr5	-1.05564	6.72362	0.567211
ENSG00000065320	NTN1	netrin 1	chr17	0.866861	6.59358	0.568697
ENSG00000122952	ZWINT	ZW10 interacting kinetochore protein	chr10	1.1174	7.18374	0.576161
ENSG00000107719	PALD1	phosphatase domain containing, paladin 1	chr10	-0.88707	6.58161	0.576161
ENSG00000108375	RNF43	ring finger protein 43	chr17	-0.956711	6.63071	0.577263
ENSG00000230797	YY2	YY2 transcription factor	chrX	-0.829215	6.55364	0.578237
ENSG00000126500	FLRT1	fibronectin leucine rich transmembrane protein 1	chr11	-0.93187	6.59833	0.580105
ENSG00000173598	NUDT4	nudix hydrolase 4	chr12	1.08724	7.90511	0.580185
ENSG00000225792	LOC105375304	uncharacterized LOC105375304	NA	-1.03265	6.74253	0.580185
ENSG00000135298	ADGRB3	adhesion G protein-coupled receptor B3	chr6	0.950025	6.68148	0.580185
ENSG00000166473	PKD1L2	polycystin 1 like 2 (gene/pseudogene)	chr16	-0.745441	6.53399	0.581173
ENSG00000077063	CTTNBP2	cortactin binding protein 2	chr7	-0.969412	6.66391	0.582322
ENSG00000174943	KCTD13	potassium channel tetramerization domain containing 13	chr16	1.08481	6.89969	0.583608
ENSG00000103876	FAH	fumarylacetoacetate hydrolase	chr15	0.988996	6.73981	0.584345
ENSG00000130826	MIR664B	microRNA 664b	NA	1.09813	7.55746	0.586323
ENSG00000185467	KPNA7	karyopherin subunit alpha 7	chr7	-0.850883	6.57996	0.586323
ENSG00000119943	MIR1287	microRNA 1287	NA	-0.950473	6.59941	0.588703
ENSG00000107960	STN1	STN1, CST complex subunit	chr10	-0.932663	6.65289	0.59066
ENSG00000120820	GLT8D2	glycosyltransferase 8 domain containing 2	chr12	-1.06868	6.89862	0.592625
ENSG00000128536	CDHR3	cadherin related family member 3	chr7	-0.995035	6.72336	0.592625
ENSG00000121281	ADCY7	adenylate cyclase 7	chr16	0.881483	6.62675	0.59739
ENSG00000250722	SELENOP	selenoprotein P	chr5	-1.12568	7.13139	0.598373
ENSG00000196338	NLGN3	neuroligin 3	chrX	1.06734	6.99014	0.598928
ENSG00000154493	C10orf90	chromosome 10 open reading frame 90	chr10	0.950136	6.62096	0.603062
ENSG00000160410	SHKBP1	SH3KBP1 binding protein 1	chr19	1.09299	7.66947	0.605795
ENSG00000173068	BNC2	basonuclin 2	chr9	1.11712	7.63271	0.606483
ENSG00000165501	LRR1	leucine rich repeat protein 1	chr14	1.04718	6.88458	0.606483
ENSG00000196562	SULF2	sulfatase 2	chr20	-0.960581	6.65644	0.606483
ENSG00000119929	CUTC	cutC copper transporter	chr10	1.03342	6.90276	0.606483
ENSG00000007350	TKTL1	transketolase like 1	chrX	-0.85489	6.59549	0.606483
ENSG00000107874	CUEDC2	CUE domain containing 2	chr10	1.06325	7.31131	0.607984
ENSG00000111885	MAN1A1	mannosidase alpha class 1A member 1	chr6	-1.06295	6.75435	0.609008
ENSG00000168952	STXBP6	syntaxin binding protein 6	chr14	0.890971	6.62998	0.609008
ENSG00000174371	EXO1	exonuclease 1	chr1	1.06424	6.83014	0.612652
ENSG00000163820	FYCO1	FYVE and coiled-coil domain containing 1	chr3	0.978009	6.7004	0.613474
ENSG00000142621	FHAD1	forkhead associated phosphopeptide binding domain 1	chr1	-0.874186	6.59326	0.614197
ENSG00000250133	HOXC-AS2	HOXC cluster antisense RNA 2	NA	-1.09583	7.12172	0.616888
ENSG00000133739	LRRCC1	leucine rich repeat and coiled-coil centrosomal protein 1	chr8	1.09727	7.06592	0.622141
ENSG00000196547	MAN2A2	mannosidase alpha class 2A member 2	chr15	1.07762	7.29766	0.622141
ENSG00000106012	IQCE	IQ motif containing E	chr7	-1.00758	6.73166	0.622141
ENSG00000124212	PTGIS	prostaglandin I2 synthase	chr20	-0.909842	6.6121	0.622141
ENSG00000197448	GSTK1	glutathione S-transferase kappa 1	chr7	1.05	7.02944	0.631207
ENSG00000184271	POU6F1	POU class 6 homeobox 1	chr12	0.797505	6.56712	0.632475
ENSG00000124126	PREX1	phosphatidylinositol-3,4,5-trisphosphate dependent Rac exchange factor 1	chr20	1.07361	7.69248	0.633404
ENSG00000279192	PWAR5	Prader Willi/Angelman region RNA 5	chr15	-1.01794	6.70898	0.644977
ENSG00000112242	E2F3	E2F transcription factor 3	chr6	1.08412	7.53411	0.649281
ENSG00000004478	FKBP4	FK506 binding protein 4	chr12	1.08176	7.39775	0.649622
ENSG00000163577	EIF5A2	eukaryotic translation initiation factor 5A2	chr3	0.929638	6.66906	0.649622
ENSG00000134574	DDB2	damage specific DNA binding protein 2	chr11	1.05877	7.15312	0.649622
ENSG00000139974	SLC38A6	solute carrier family 38 member 6	chr14	-1.00327	6.75905	0.649622
ENSG00000088298	EDEM2	ER degradation enhancing alpha-mannosidase like protein 2	chr20	0.926309	6.68333	0.649622
ENSG00000054793	ATP9A	ATPase phospholipid transporting 9A (putative)	chr20	1.04941	6.99795	0.65074
ENSG00000133640	LRRIQ1	leucine rich repeats and IQ motif containing 1	chr12	-0.869047	6.57103	0.651093
ENSG00000254852	NPIPA2	nuclear pore complex interacting protein family member A2	NA	-1.01472	6.89397	0.651093
ENSG00000179008	C14orf39	chromosome 14 open reading frame 39	chr14	0.893587	6.63611	0.652577
ENSG00000123983	ACSL3	acyl-CoA synthetase long-chain family member 3	chr2	-1.07123	8.2742	0.653718
ENSG00000164953	TMEM67	transmembrane protein 67	chr8	-1.05988	7.06752	0.654677
ENSG00000131389	SLC6A6	solute carrier family 6 member 6	chr3	1.05333	6.94095	0.657489
ENSG00000137726	FXYD6	FXYD domain containing ion transport regulator 6	chr11	1.06515	8.2623	0.657555
ENSG00000140543	DET1	de-etiolated homolog 1 (Arabidopsis)	chr15	1.07681	6.95115	0.66121
ENSG00000125703	ATG4C	autophagy related 4C cysteine peptidase	chr1	1.07615	7.10248	0.66121
ENSG00000136122	BORA	bora, aurora kinase A activator	chr13	1.06048	6.88665	0.665307
ENSG00000169213	RAB3B	RAB3B, member RAS oncogene family	chr1	1.08026	7.03051	0.665309
ENSG00000189171	S100A13	S100 calcium binding protein A13	chr1	-0.949409	6.64875	0.666587
ENSG00000259291	ZNF710-AS1	ZNF710 antisense RNA 1	NA	0.916394	6.66011	0.666607
ENSG00000106789	CORO2A	coronin 2A	chr9	1.07753	7.33121	0.669827
ENSG00000183032	SLC25A21	solute carrier family 25 member 21	chr14	-0.847914	6.57141	0.669827
ENSG00000114626	ABTB1	ankyrin repeat and BTB domain containing 1	chr3	0.684518	6.54348	0.672198
ENSG00000231252	LOC101926964	uncharacterized LOC101926964	NA	0.891485	6.65716	0.672535
ENSG00000244486	SCARF2	scavenger receptor class F member 2	chr22	1.04956	6.99802	0.676293
ENSG00000176595	KBTBD11	kelch repeat and BTB domain containing 11	chr8	1.03265	6.94121	0.676293
ENSG00000128335	APOL2	apolipoprotein L2	chr22	-0.898328	6.61597	0.677234
ENSG00000147027	TMEM47	transmembrane protein 47	chrX	-1.01284	6.76216	0.677234
ENSG00000214617	SLC6A10P	solute carrier family 6 member 10, pseudogene	chr16	-0.730695	6.54474	0.677234
ENSG00000141682	PMAIP1	phorbol-12-myristate-13-acetate-induced protein 1	chr18	0.905276	6.62376	0.681728
ENSG00000132849	PATJ	PATJ, crumbs cell polarity complex component	chr1	-1.00318	6.80989	0.682101
ENSG00000099785	2002-03-01	membrane associated ring-CH-type finger 2	chr19	-0.808995	6.57342	0.682996
ENSG00000082781	ITGB5	integrin subunit beta 5	chr3	1.03638	6.98167	0.684772
ENSG00000170515	PA2G4	proliferation-associated 2G4	chr12	1.06993	8.22977	0.698134
ENSG00000204282	TNRC6C-AS1	TNRC6C antisense RNA 1	NA	0.842503	6.61617	0.698408
ENSG00000274020	LINC01138	long intergenic non-protein coding RNA 1138	NA	-0.881389	6.60227	0.702076
ENSG00000185532	PRKG1	protein kinase, cGMP-dependent, type I	chr10	-1.03583	6.84782	0.703677
ENSG00000078804	TP53INP2	tumor protein p53 inducible nuclear protein 2	chr20	-1.03141	6.76815	0.710301
ENSG00000167037	SGSM1	small G protein signaling modulator 1	chr22	-0.703657	6.5347	0.712705
ENSG00000275832	ARHGAP23	Rho GTPase activating protein 23	chr17	1.10353	7.57319	0.713882
ENSG00000084628	NKAIN1	sodium/potassium transporting ATPase interacting 1	chr1	0.952254	6.76795	0.714743
ENSG00000136982	DSCC1	DNA replication and sister chromatid cohesion 1	chr8	0.949021	6.74432	0.715184
ENSG00000048540	LMO3	LIM domain only 3	chr12	-1.10634	7.28992	0.718208
ENSG00000233926	LOC101927502	uncharacterized LOC101927502	NA	0.965737	6.71969	0.724456
ENSG00000112893	MAN2A1	mannosidase alpha class 2A member 1	chr5	-1.07109	7.589	0.728285
ENSG00000111670	GNPTAB	N-acetylglucosamine-1-phosphate transferase alpha and beta subunits	chr12	1.02143	6.99997	0.732987
ENSG00000180336	MEIOC	meiosis specific with coiled-coil domain	chr17	0.737333	6.55785	0.733302
ENSG00000171649	ZIK1	zinc finger protein interacting with K protein 1	chr19	-0.909779	6.64432	0.737511
ENSG00000141428	C18orf21	chromosome 18 open reading frame 21	chr18	1.02425	6.89478	0.7386
ENSG00000130787	HIP1R	huntingtin interacting protein 1 related	chr12	-0.91692	6.64722	0.7386
ENSG00000160055	TMEM234	transmembrane protein 234	chr1	-0.828906	6.58089	0.744329
ENSG00000141480	ARRB2	arrestin beta 2	chr17	1.02543	7.0452	0.745193
ENSG00000256453	DND1	DND microRNA-mediated repression inhibitor 1	chr5	0.757634	6.56502	0.746126
ENSG00000179241	LDLRAD3	low density lipoprotein receptor class A domain containing 3	chr11	1.00349	6.95991	0.747414
ENSG00000211460	TSN	translin	chr2	1.06385	8.53687	0.748008
ENSG00000176894	PXMP2	peroxisomal membrane protein 2	chr12	0.806542	6.60124	0.749658
ENSG00000186716	BCR	BCR, RhoGEF and GTPase activating protein	chr22	-0.971897	6.78062	0.754616
ENSG00000128606	LRRC17	leucine rich repeat containing 17	chr7	-1.07257	7.56076	0.757194
ENSG00000169926	KLF13	Kruppel like factor 13	chr15	1.06681	7.7	0.772911
ENSG00000164687	FABP5	fatty acid binding protein 5	chr8	1.04656	7.16331	0.77832
ENSG00000140104	C14orf79	chromosome 14 open reading frame 79	chr14	-0.743913	6.55038	0.784587
ENSG00000114200	BCHE	butyrylcholinesterase	chr3	1.07839	8.44385	0.787665
ENSG00000162849	KIF26B	kinesin family member 26B	chr1	-1.02212	6.73909	0.788886
ENSG00000092208	GEMIN2	gem nuclear organelle associated protein 2	chr14	0.964632	6.81826	0.791418
ENSG00000167771	RCOR2	REST corepressor 2	chr11	-1.04445	7.6153	0.791418
ENSG00000163453	IGFBP7	insulin like growth factor binding protein 7	chr4	-1.03064	6.79557	0.79818
ENSG00000185269	NOTUM	NOTUM, palmitoleoyl-protein carboxylesterase	chr17	0.951101	6.70246	0.79818
ENSG00000141391	PRELID3A	PRELI domain containing 3A	chr18	0.88986	6.64547	0.800667
ENSG00000094804	CDC6	cell division cycle 6	chr17	1.05302	7.01127	0.806108
ENSG00000139946	PELI2	pellino E3 ubiquitin protein ligase family member 2	chr14	0.703015	6.55931	0.815277
ENSG00000230590	FTX	FTX transcript, XIST regulator (non-protein coding)	NA	-0.993049	6.92309	0.8211
ENSG00000072786	STK10	serine/threonine kinase 10	chr5	1.04072	7.30291	0.824252
ENSG00000125170	DOK4	docking protein 4	chr16	-0.987978	6.84428	0.830751
ENSG00000161298	ZNF382	zinc finger protein 382	chr19	-0.900452	6.62736	0.83145
ENSG00000137502	RAB30	RAB30, member RAS oncogene family	chr11	1.05063	7.18813	0.832798
ENSG00000115350	POLE4	DNA polymerase epsilon 4, accessory subunit	chr2	0.8314	6.61643	0.833414
ENSG00000075131	TIPIN	TIMELESS interacting protein	chr15	0.885365	6.70153	0.834055
ENSG00000131153	GINS2	GINS complex subunit 2	chr16	1.04418	7.09473	0.842529
ENSG00000049130	KITLG	KIT ligand	chr12	-1.01712	6.7603	0.842529
ENSG00000141569	TRIM65	tripartite motif containing 65	chr17	-0.860049	6.62867	0.844174
ENSG00000169247	SH3TC2	SH3 domain and tetratricopeptide repeats 2	chr5	0.709983	6.57174	0.845636
ENSG00000171877	FRMD5	FERM domain containing 5	chr15	0.857165	6.63772	0.856995
ENSG00000143126	CELSR2	cadherin EGF LAG seven-pass G-type receptor 2	chr1	1.05324	7.60325	0.859342
ENSG00000214401	LOC107984142	uncharacterized LOC107984142	NA	-0.772708	6.57649	0.859342
ENSG00000280145	LINC01670	long intergenic non-protein coding RNA 1670	NA	1.03726	7.21775	0.859669
ENSG00000144283	PKP4	plakophilin 4	chr2	-1.04419	7.14742	0.859669
ENSG00000068724	TTC7A	tetratricopeptide repeat domain 7A	chr2	-0.813867	6.58215	0.859669
ENSG00000118276	B4GALT6	beta-1,4-galactosyltransferase 6	chr18	1.02011	7.07847	0.861786
ENSG00000078018	MAP2	microtubule associated protein 2	chr2	-1.0553	7.93127	0.864713
ENSG00000198513	ATL1	atlastin GTPase 1	chr14	0.91434	6.72613	0.868594
ENSG00000008086	CDKL5	cyclin dependent kinase like 5	chrX	-0.995471	6.85003	0.880584
ENSG00000179163	FUCA1	fucosidase, alpha-L- 1, tissue	chr1	0.758509	6.58294	0.8821
ENSG00000107201	DDX58	DExD/H-box helicase 58	chr9	0.835101	6.62198	0.88274
ENSG00000158079	PTPDC1	protein tyrosine phosphatase domain containing 1	chr9	-0.973372	6.80453	0.88274
ENSG00000171729	TMEM51	transmembrane protein 51	chr1	-0.965871	6.75952	0.887256
ENSG00000204147	ASAH2	N-acylsphingosine amidohydrolase 2	chr10	0.778271	6.59415	0.904758
ENSG00000231160	KLF3-AS1	KLF3 antisense RNA 1	NA	-0.764778	6.5643	0.906248
ENSG00000237649	KIFC1	kinesin family member C1	chr6_qbl_hap6	0.99066	6.93754	0.913163
ENSG00000122971	ACADS	acyl-CoA dehydrogenase, C-2 to C-3 short chain	chr12	0.741855	6.58072	0.913471
ENSG00000103343	ZNF174	zinc finger protein 174	chr16	0.868693	6.66038	0.913927
ENSG00000135469	COQ10A	coenzyme Q10A	chr12	-0.860971	6.63798	0.913927
ENSG00000072195	LOC100996693	CAVP-target protein-like	NA	-0.881663	6.66088	0.914797
ENSG00000005022	SLC25A5	solute carrier family 25 member 5	chrX	1.0337	9.71458	0.916972
ENSG00000196814	MVB12B	multivesicular body subunit 12B	chr9	1.00806	7.14587	0.918673
ENSG00000197892	KIF13B	kinesin family member 13B	chr8	0.987363	6.92177	0.920077
ENSG00000248593	DSTNP2	destrin, actin depolymerizing factor pseudogene 2	chr12	-0.790209	6.58058	0.923543
ENSG00000072864	NDE1	nudE neurodevelopment protein 1	chr16	1.01881	6.99429	0.924068
ENSG00000100605	ITPK1	inositol-tetrakisphosphate 1-kinase	chr14	1.03097	7.30224	0.925455
ENSG00000145349	CAMK2D	calcium/calmodulin dependent protein kinase II delta	chr4	-1.03855	7.5365	0.930159
ENSG00000181830	SLC35C1	solute carrier family 35 member C1	chr11	0.919081	6.72559	0.930215
ENSG00000105996	HOXA2	homeobox A2	chr7	-0.845234	6.60819	0.930215
ENSG00000061918	GUCY1B3	guanylate cyclase 1 soluble subunit beta	chr4	-0.807841	6.57925	0.930215
ENSG00000177000	MTHFR	methylenetetrahydrofolate reductase	chr1	-1.04005	7.2609	0.931186
ENSG00000014138	POLA2	DNA polymerase alpha 2, accessory subunit	chr11	0.939016	6.79843	0.932429
ENSG00000166171	DPCD	deleted in primary ciliary dyskinesia homolog (mouse)	chr10	-0.72218	6.55292	0.932451
ENSG00000048052	HDAC9	histone deacetylase 9	chr7	0.836412	6.62519	0.934493
ENSG00000100065	CARD10	caspase recruitment domain family member 10	chr22	0.84804	6.64228	0.935548
ENSG00000130816	DNMT1	DNA methyltransferase 1	chr19	1.06036	8.60522	0.936766
ENSG00000197093	GAL3ST4	galactose-3-O-sulfotransferase 4	chr7	0.961059	6.86597	0.936766
ENSG00000167703	SLC43A2	solute carrier family 43 member 2	chr17	-0.844871	6.6251	0.937423
ENSG00000131467	PSME3	proteasome activator subunit 3	chr17	1.04781	7.8507	0.938392
ENSG00000026559	KCNG1	potassium voltage-gated channel modifier subfamily G member 1	chr20	-0.78961	6.56964	0.938392
ENSG00000156973	PDE6D	phosphodiesterase 6D	chr2	1.04373	7.27345	0.941823
ENSG00000011422	PLAUR	plasminogen activator, urokinase receptor	chr19	0.881244	6.7104	0.941823
ENSG00000163617	CCDC191	coiled-coil domain containing 191	chr3	-0.794803	6.59531	0.944339
ENSG00000104889	RNASEH2A	ribonuclease H2 subunit A	chr19	1.00874	7.06532	0.947979
ENSG00000185201	IFITM2	interferon induced transmembrane protein 2	chr11	-1.02729	7.05138	0.957868
ENSG00000166181	API5	apoptosis inhibitor 5	chr11	1.04621	7.98673	0.959042
ENSG00000100036	SLC35E4	solute carrier family 35 member E4	chr22	-0.817216	6.61607	0.963935
ENSG00000165704	HPRT1	hypoxanthine phosphoribosyltransferase 1	chrX	1.00913	7.06915	0.965385
ENSG00000114859	CLCN2	chloride voltage-gated channel 2	chr3	0.792377	6.62462	0.965385
ENSG00000137193	PIM1	Pim-1 proto-oncogene, serine/threonine kinase	chr6	-0.820199	6.5879	0.966729
ENSG00000133019	CHRM3	cholinergic receptor muscarinic 3	chr1	-0.824391	6.6063	0.975116
ENSG00000159199	ATP5G1	ATP synthase, H+ transporting, mitochondrial Fo complex subunit C1 (subunit 9)	chr17	0.94605	6.81116	0.975116
ENSG00000120162	MOB3B	MOB kinase activator 3B	chr9	1.01992	7.21399	0.979159
ENSG00000178809	TRIM73	tripartite motif containing 73	chr7	-0.777445	6.58759	0.980094
ENSG00000167216	KATNAL2	katanin catalytic subunit A1 like 2	chr18	-0.749561	6.56516	0.980773
ENSG00000198945	L3MBTL3	l(3)mbt-like 3 (Drosophila)	chr6	0.961334	6.85296	0.984407
ENSG00000189221	MAOA	monoamine oxidase A	chrX	0.726978	6.58791	0.984407
ENSG00000205794	LOC344967	acyl-CoA thioesterase 7 pseudogene	chr4	-0.609673	6.51734	0.984407
ENSG00000114270	MIR711	microRNA 711	NA	-0.862874	6.65776	0.985132
ENSG00000107521	HPS1	HPS1, biogenesis of lysosomal organelles complex 3 subunit 1	chr10	1.01806	7.1156	0.991913
ENSG00000053254	FOXN3	forkhead box N3	chr14	1.04113	8.11981	0.994023
ENSG00000132256	TRIM5	tripartite motif containing 5	chr11	-1.01061	7.22219	0.995126
ENSG00000131747	TOP2A	topoisomerase (DNA) II alpha	chr17	0.226514	9.39613	1
ENSG00000117724	CENPF	centromere protein F	chr1	0.504521	9.71315	1
ENSG00000148773	MKI67	marker of proliferation Ki-67	chr10	0.569731	9.19585	1
ENSG00000066279	ASPM	abnormal spindle microtubule assembly	chr1	0.545819	8.93655	1
ENSG00000138778	CENPE	centromere protein E	chr4	0.292625	8.68209	1
ENSG00000198901	PRC1	protein regulator of cytokinesis 1	chr15	1.04684	8.48423	1
ENSG00000245532	NEAT1	nuclear paraspeckle assembly transcript 1 (non-protein coding)	NA	-0.83912	9.45701	1
ENSG00000164104	HMGB2	high mobility group box 2	chr4	0.4972	8.31995	1
ENSG00000113810	SMC4	structural maintenance of chromosomes 4	chr3	0.670768	9.43072	1
ENSG00000188229	TUBB4B	tubulin beta 4B class IVb	chr9	-0.595341	8.66701	1
ENSG00000170540	ARL6IP1	ADP ribosylation factor like GTPase 6 interacting protein 1	chr16	-0.385578	8.81087	1
ENSG00000170312	CDK1	cyclin dependent kinase 1	chr10	1.00814	8.07568	1
ENSG00000134057	CCNB1	cyclin B1	chr5	-0.0166185	8.0045	1
ENSG00000137804	NUSAP1	nucleolar and spindle associated protein 1	chr15	0.484772	8.05211	1
ENSG00000166450	PRTG	protogenin	chr15	-0.860289	8.67538	1
ENSG00000166851	PLK1	polo like kinase 1	chr16	0.833911	8.18116	1
ENSG00000187678	SPRY4	sprouty RTK signaling antagonist 4	chr5	0.796014	8.30695	1
ENSG00000138182	KIF20B	kinesin family member 20B	chr10	0.918481	8.045	1
ENSG00000013810	TACC3	transforming acidic coiled-coil containing protein 3	chr4	0.355051	7.95767	1
ENSG00000088325	TPX2	TPX2, microtubule nucleation factor	chr20	0.311148	7.80474	1
ENSG00000197061	HIST1H4C	histone cluster 1 H4 family member c	chr6	0.831349	7.87567	1
ENSG00000109805	NCAPG	non-SMC condensin I complex subunit G	chr4	0.305979	8.00929	1
ENSG00000176890	TYMS	thymidylate synthetase	chr18	0.689498	8.40735	1
ENSG00000242265	PEG10	paternally expressed 10	chr7	-0.952909	8.88385	1
ENSG00000112972	HMGCS1	3-hydroxy-3-methylglutaryl-CoA synthase 1	chr5	-0.280241	10.6555	1
ENSG00000178999	AURKB	aurora kinase B	chr17	0.619087	7.92428	1
ENSG00000112984	KIF20A	kinesin family member 20A	chr5	0.296913	7.65413	1
ENSG00000126787	DLGAP5	DLG associated protein 5	chr14	0.101847	7.78793	1
ENSG00000131914	LIN28A	lin-28 homolog A	chr1	0.584013	8.53989	1
ENSG00000145386	CCNA2	cyclin A2	chr4	0.368376	7.8224	1
ENSG00000182481	KPNA2	karyopherin subunit alpha 2	chr17	0.512984	8.5946	1
ENSG00000120738	EGR1	early growth response 1	chr5	0.126374	7.92299	1
ENSG00000175899	A2M	alpha-2-macroglobulin	chr12	0.0137402	7.94629	1
ENSG00000118193	KIF14	kinesin family member 14	chr1	0.267124	7.57313	1
ENSG00000142945	KIF2C	kinesin family member 2C	chr1	0.700106	7.55235	1
ENSG00000156970	BUB1B	BUB1 mitotic checkpoint serine/threonine kinase B	chr15	0.42007	7.69045	1
ENSG00000108821	COL1A1	collagen type I alpha 1 chain	chr17	0.0866196	7.7333	1
ENSG00000272398	CD24	CD24 molecule	chrY	-0.576462	8.0375	1
ENSG00000186480	INSIG1	insulin induced gene 1	chr7	-0.688354	8.34994	1
ENSG00000269028	MTRNR2L2	MT-RNR2-like 2	chr5	0.203851	12.6769	1
ENSG00000237412	PRSS56	protease, serine 56	chr2	0.371552	8.20962	1
ENSG00000117399	CDC20	cell division cycle 20	chr1	0.203576	7.59452	1
ENSG00000136108	CKAP2	cytoskeleton associated protein 2	chr13	0.552683	8.28859	1
ENSG00000171848	RRM2	ribonucleotide reductase regulatory subunit M2	chr2	0.990146	7.73465	1
ENSG00000114346	ECT2	epithelial cell transforming 2	chr3	0.0878081	7.63533	1
ENSG00000072110	ACTN1	actinin alpha 1	chr14	-0.825154	8.46576	1
ENSG00000167553	TUBA1C	tubulin alpha 1c	chr12	-0.993594	8.48415	1
ENSG00000269821	KCNQ1OT1	KCNQ1 opposite strand/antisense transcript 1 (non-protein coding)	NA	-0.820738	9.75605	1
ENSG00000072571	HMMR	hyaluronan mediated motility receptor	chr5	0.316076	7.52604	1
ENSG00000129657	SEC14L1	SEC14 like lipid binding 1	chr17	0.457029	8.70988	1
ENSG00000011426	ANLN	anillin actin binding protein	chr7	0.689272	7.6466	1
ENSG00000119969	HELLS	helicase, lymphoid-specific	chr10	0.891558	8.30894	1
ENSG00000181449	SOX2	SRY-box 2	chr3	-0.938215	8.36492	1
ENSG00000068489	PRR11	proline rich 11	chr17	0.0861335	8.02307	1
ENSG00000008196	TFAP2B	transcription factor AP-2 beta	chr6	0.0936821	10.1932	1
ENSG00000090889	KIF4A	kinesin family member 4A	chrX	-0.134561	7.53103	1
ENSG00000118257	NRP2	neuropilin 2	chr2	-0.50139	8.80472	1
ENSG00000255823	MTRNR2L8	MT-RNR2-like 8	chr11	0.159984	12.2148	1
ENSG00000157456	CCNB2	cyclin B2	chr15	-0.224645	7.71008	1
ENSG00000163535	SGO2	shugoshin 2	chr2	0.626627	7.46328	1
ENSG00000228716	DHFR	dihydrofolate reductase	chr5	1.00823	8.23916	1
ENSG00000109929	SC5D	sterol-C5-desaturase	chr11	-0.771196	8.51043	1
ENSG00000010292	NCAPD2	non-SMC condensin I complex subunit D2	chr12	0.256178	8.15323	1
ENSG00000234745	HLA-B	major histocompatibility complex, class I, B	chr6_qbl_hap6	0.624825	8.24473	1
ENSG00000133812	SBF2	SET binding factor 2	chr11	-0.209382	8.48913	1
ENSG00000169679	BUB1	BUB1 mitotic checkpoint serine/threonine kinase	chr2	0.164442	7.50149	1
ENSG00000204843	DCTN1	dynactin subunit 1	chr2	0.773496	8.8612	1
ENSG00000052802	MSMO1	methylsterol monooxygenase 1	chr4	-0.486542	9.5276	1
ENSG00000198910	L1CAM	L1 cell adhesion molecule	chrX	0.55935	8.5139	1
ENSG00000174721	FGFBP3	fibroblast growth factor binding protein 3	chr10	0.0398623	9.99293	1
ENSG00000075218	GTSE1	G2 and S-phase expressed 1	chr22	0.50171	7.54122	1
ENSG00000130203	APOE	apolipoprotein E	chr19	-0.85176	7.78638	1
ENSG00000072501	SMC1A	structural maintenance of chromosomes 1A	chrX	0.433667	8.36323	1
ENSG00000179195	ZNF664	zinc finger protein 664	chr12	0.937246	8.65257	1
ENSG00000140451	PIF1	PIF1 5'-to-3' DNA helicase	chr15	0.60348	7.37113	1
ENSG00000080822	CLDND1	claudin domain containing 1	chr3	1.04237	8.44634	1
ENSG00000140718	FTO	FTO, alpha-ketoglutarate dependent dioxygenase	chr16	0.851392	8.07592	1
ENSG00000138160	KIF11	kinesin family member 11	chr10	0.326865	7.56492	1
ENSG00000105341	ATP5SL	ATP5S like	chr19	0.622056	8.16638	1
ENSG00000135451	TROAP	trophinin associated protein	chr12	0.418918	7.58524	1
ENSG00000168209	DDIT4	DNA damage inducible transcript 4	chr10	-0.962575	7.91424	1
ENSG00000120802	TMPO	thymopoietin	chr12	0.181163	8.51975	1
ENSG00000170315	UBB	ubiquitin B	chr17	0.571596	9.26817	1
ENSG00000171551	ECEL1	endothelin converting enzyme like 1	chr2	-0.549272	7.67197	1
ENSG00000132646	PCNA	proliferating cell nuclear antigen	chr20	0.898647	7.5756	1
ENSG00000265972	TXNIP	thioredoxin interacting protein	chr1	-0.375147	9.02577	1
ENSG00000161547	SRSF2	serine and arginine rich splicing factor 2	chr17	0.394811	8.99914	1
ENSG00000157870	FAM213B	family with sequence similarity 213 member B	chr1	0.867995	7.46621	1
ENSG00000137807	KIF23	kinesin family member 23	chr15	0.628669	7.38688	1
ENSG00000164611	PTTG1	pituitary tumor-transforming 1	chr5	-0.0724934	7.65349	1
ENSG00000123416	TUBA1B	tubulin alpha 1b	chr12	0.171785	11.8465	1
ENSG00000166889	PATL1	PAT1 homolog 1, processing body mRNA decay factor	chr11	0.946646	7.91329	1
ENSG00000164109	MAD2L1	mitotic arrest deficient 2 like 1	chr4	1.00012	7.51369	1
ENSG00000135069	PSAT1	phosphoserine aminotransferase 1	chr9	0.841759	8.4176	1
ENSG00000149547	EI24	EI24, autophagy associated transmembrane protein	chr11	0.720291	8.73162	1
ENSG00000130508	PXDN	peroxidasin	chr2	0.0936615	8.80267	1
ENSG00000180818	HOXC10	homeobox C10	chr12	-0.726406	8.22466	1
ENSG00000188486	H2AFX	H2A histone family member X	chr11	0.68166	7.53495	1
ENSG00000076003	MCM6	minichromosome maintenance complex component 6	chr2	0.765734	7.59808	1
ENSG00000137812	KNL1	kinetochore scaffold 1	chr15	0.208459	7.36739	1
ENSG00000101333	PLCB4	phospholipase C beta 4	chr20	0.927262	8.55105	1
ENSG00000112742	TTK	TTK protein kinase	chr6	0.639515	7.30143	1
ENSG00000250337	LINC01021	long intergenic non-protein coding RNA 1021	NA	-0.293176	7.52766	1
ENSG00000175216	CKAP5	cytoskeleton associated protein 5	chr11	-0.137898	8.33629	1
ENSG00000024526	DEPDC1	DEP domain containing 1	chr1	0.161789	7.29836	1
ENSG00000105290	APLP1	amyloid beta precursor like protein 1	chr19	0.547858	7.83422	1
ENSG00000172893	DHCR7	7-dehydrocholesterol reductase	chr11	-0.260646	8.23204	1
ENSG00000165732	DDX21	DExD-box helicase 21	chr10	0.738441	8.24616	1
ENSG00000175063	UBE2C	ubiquitin conjugating enzyme E2 C	chr20	0.743364	7.37926	1
ENSG00000011021	CLCN6	chloride voltage-gated channel 6	chr1	0.134569	8.02227	1
ENSG00000080986	NDC80	NDC80, kinetochore complex component	chr18	0.534973	7.24808	1
ENSG00000134222	PSRC1	proline and serine rich coiled-coil 1	chr1	0.164766	7.46459	1
ENSG00000143228	NUF2	NUF2, NDC80 kinetochore complex component	chr1	0.29309	7.34675	1
ENSG00000103187	COTL1	coactosin like F-actin binding protein 1	chr16	-1.0159	8.32528	1
ENSG00000120075	HOXB5	homeobox B5	chr17	-0.395876	8.0143	1
ENSG00000154310	TNIK	TRAF2 and NCK interacting kinase	chr3	0.839376	8.23465	1
ENSG00000074590	NUAK1	NUAK family kinase 1	chr12	-0.977691	7.75731	1
ENSG00000164032	H2AFZ	H2A histone family member Z	chr4	-0.166854	8.78109	1
ENSG00000187951	LOC100288637	OTU deubiquitinase 7A pseudogene	NA	0.84201	7.32739	1
ENSG00000166165	CKB	creatine kinase B	chr14	-0.398128	7.78837	1
ENSG00000151835	SACS	sacsin molecular chaperone	chr13	1.0348	8.70378	1
ENSG00000132688	NES	nestin	chr1	-1.02173	8.40564	1
ENSG00000060718	COL11A1	collagen type XI alpha 1 chain	chr1	-0.917915	8.61469	1
ENSG00000078399	HOXA9	homeobox A9	chr7	-0.653991	8.16814	1
ENSG00000140525	FANCI	Fanconi anemia complementation group I	chr15	0.712573	7.52217	1
ENSG00000141258	SGSM2	small G protein signaling modulator 2	chr17	0.680458	8.12558	1
ENSG00000118412	CASP8AP2	caspase 8 associated protein 2	chr6	0.993963	7.72409	1
ENSG00000185591	SP1	Sp1 transcription factor	chr12	0.924273	8.17605	1
ENSG00000110092	CCND1	cyclin D1	chr11	0.772348	8.13876	1
ENSG00000185033	SEMA4B	semaphorin 4B	chr15	0.815115	7.22462	1
ENSG00000087586	AURKA	aurora kinase A	chr20	0.104643	7.25656	1
ENSG00000117650	NEK2	NIMA related kinase 2	chr1	0.366583	7.13092	1
ENSG00000139318	DUSP6	dual specificity phosphatase 6	chr12	0.355377	7.83647	1
ENSG00000102265	TIMP1	TIMP metallopeptidase inhibitor 1	chrX	-0.458592	7.96725	1
ENSG00000113161	HMGCR	3-hydroxy-3-methylglutaryl-CoA reductase	chr5	-0.396851	9.09547	1
ENSG00000187231	SESTD1	SEC14 and spectrin domain containing 1	chr2	-0.727517	8.07236	1
ENSG00000134333	LDHA	lactate dehydrogenase A	chr11	0.453734	7.57996	1
ENSG00000112118	MCM3	minichromosome maintenance complex component 3	chr6	0.882809	7.66578	1
ENSG00000115204	MPV17	MPV17, mitochondrial inner membrane protein	chr2	0.790776	7.89105	1
ENSG00000125266	EFNB2	ephrin B2	chr13	-0.714796	7.8831	1
ENSG00000134186	PRPF38B	pre-mRNA processing factor 38B	chr1	0.783473	8.59744	1
ENSG00000112029	FBXO5	F-box protein 5	chr6	0.949435	7.33426	1
ENSG00000076382	SPAG5	sperm associated antigen 5	chr17	0.124652	7.40925	1
ENSG00000154473	BUB3	BUB3, mitotic checkpoint protein	chr10	0.764228	7.95639	1
ENSG00000213585	VDAC1	voltage dependent anion channel 1	chr5	0.821186	8.94427	1
ENSG00000169607	CKAP2L	cytoskeleton associated protein 2 like	chr2	0.619283	7.18898	1
ENSG00000114315	HES1	hes family bHLH transcription factor 1	chr3	-0.142005	7.6203	1
ENSG00000021826	CPS1	carbamoyl-phosphate synthase 1	chr2	0.288908	7.36577	1
ENSG00000129195	PIMREG	PICALM interacting mitotic regulator	chr17	0.210377	7.22044	1
ENSG00000100075	SLC25A1	solute carrier family 25 member 1	chr22	0.356316	8.60704	1
ENSG00000167552	TUBA1A	tubulin alpha 1a	chr12	-0.198176	11.1572	1
ENSG00000154945	ANKRD40	ankyrin repeat domain 40	chr17	1.01597	7.73334	1
ENSG00000185650	ZFP36L1	ZFP36 ring finger protein like 1	chr14	-0.277737	9.62356	1
ENSG00000184661	CDCA2	cell division cycle associated 2	chr8	0.665679	7.21283	1
ENSG00000144224	UBXN4	UBX domain protein 4	chr2	0.533648	8.72485	1
ENSG00000176788	BASP1	brain abundant membrane attached signal protein 1	chr5	-1.00692	8.2385	1
ENSG00000176014	TUBB6	tubulin beta 6 class V	chr18	-0.24907	7.6926	1
ENSG00000106070	GRB10	growth factor receptor bound protein 10	chr7	-0.277142	7.78811	1
ENSG00000099194	SCD	stearoyl-CoA desaturase	chr10	-0.543499	10.4719	1
ENSG00000120437	ACAT2	acetyl-CoA acetyltransferase 2	chr6	-0.194817	8.48013	1
ENSG00000168411	RFWD3	ring finger and WD repeat domain 3	chr16	0.787655	7.62889	1
ENSG00000198826	ARHGAP11A	Rho GTPase activating protein 11A	chr15	0.268587	7.29949	1
ENSG00000089685	BIRC5	baculoviral IAP repeat containing 5	chr17	0.0474739	7.3585	1
ENSG00000102317	RBM3	RNA binding motif (RNP1, RRM) protein 3	chrX	0.640932	8.69017	1
ENSG00000180357	ZNF609	zinc finger protein 609	chr15	0.087483	8.05797	1
ENSG00000117643	MAN1C1	mannosidase alpha class 1C member 1	chr1	-0.534112	7.58776	1
ENSG00000156802	ATAD2	ATPase family, AAA domain containing 2	chr8	0.650801	7.4156	1
ENSG00000149532	CPSF7	cleavage and polyadenylation specific factor 7	chr11	1.03519	8.10059	1
ENSG00000135476	ESPL1	extra spindle pole bodies like 1, separase	chr12	0.682054	7.16631	1
ENSG00000169710	FASN	fatty acid synthase	chr17	0.113238	9.92514	1
ENSG00000129534	MIS18BP1	MIS18 binding protein 1	chr14	0.471842	7.49097	1
ENSG00000104331	IMPAD1	inositol monophosphatase domain containing 1	chr8	0.675208	7.74078	1
ENSG00000189060	H1F0	H1 histone family member 0	chr22	0.0861856	7.03003	1
ENSG00000129244	ATP1B2	ATPase Na+/K+ transporting subunit beta 2	chr17	0.0904245	8.31219	1
ENSG00000089737	DDX24	DEAD-box helicase 24	chr14	0.722049	8.0764	1
ENSG00000117114	ADGRL2	adhesion G protein-coupled receptor L2	chr1	-0.170216	8.01333	1
ENSG00000146938	NLGN4X	neuroligin 4, X-linked	chrX	0.399725	7.67315	1
ENSG00000187735	TCEA1	transcription elongation factor A1	chr8	0.714498	8.63993	1
ENSG00000170961	HAS2	hyaluronan synthase 2	chr8	0.391254	7.3884	1
ENSG00000134690	CDCA8	cell division cycle associated 8	chr1	0.18694	7.29394	1
ENSG00000170689	HOXB9	homeobox B9	chr17	-0.0603232	9.19092	1
ENSG00000176444	CLK2	CDC like kinase 2	chr1	0.340409	7.84371	1
ENSG00000106615	RHEB	Ras homolog enriched in brain	chr7	0.933411	8.05967	1
ENSG00000089289	IGBP1	immunoglobulin binding protein 1	chrX	0.983169	7.90333	1
ENSG00000152284	TCF7L1	transcription factor 7 like 1	chr2	0.0346451	8.81355	1
ENSG00000112759	SLC29A1	solute carrier family 29 member 1 (Augustine blood group)	chr6	0.998418	7.4737	1
ENSG00000172020	GAP43	growth associated protein 43	chr3	0.557498	7.3713	1
ENSG00000153339	TRAPPC8	trafficking protein particle complex 8	chr18	0.314189	7.59331	1
ENSG00000105821	DNAJC2	DnaJ heat shock protein family (Hsp40) member C2	chr7	0.849929	7.49467	1
ENSG00000112290	WASF1	WAS protein family member 1	chr6	-0.791511	7.64715	1
ENSG00000145675	PIK3R1	phosphoinositide-3-kinase regulatory subunit 1	chr5	-0.0584198	8.73282	1
ENSG00000148218	ALAD	aminolevulinate dehydratase	chr9	0.564345	7.31336	1
ENSG00000255717	SNHG1	small nucleolar RNA host gene 1	NA	0.707422	8.87946	1
ENSG00000106571	GLI3	GLI family zinc finger 3	chr7	0.987679	8.78854	1
ENSG00000136824	SMC2	structural maintenance of chromosomes 2	chr9	0.842242	7.59438	1
ENSG00000204899	MZT1	mitotic spindle organizing protein 1	chr13	0.0746784	7.38475	1
ENSG00000108106	UBE2S	ubiquitin conjugating enzyme E2 S	chr19	-0.529408	7.68383	1
ENSG00000139219	COL2A1	collagen type II alpha 1 chain	chr12	0.0411305	9.316	1
ENSG00000136044	APPL2	adaptor protein, phosphotyrosine interacting with PH domain and leucine zipper 2	chr12	0.939251	7.88988	1
ENSG00000167528	ZNF641	zinc finger protein 641	chr12	0.457707	7.39773	1
ENSG00000138795	LEF1	lymphoid enhancer binding factor 1	chr4	-0.512006	8.27656	1
ENSG00000092140	G2E3	G2/M-phase specific E3 ubiquitin protein ligase	chr14	0.651	7.53127	1
ENSG00000134369	NAV1	neuron navigator 1	chr1	0.541217	7.95292	1
ENSG00000168496	FEN1	flap structure-specific endonuclease 1	chr11	0.729248	7.23624	1
ENSG00000086232	EIF2AK1	eukaryotic translation initiation factor 2 alpha kinase 1	chr7	0.0915166	8.29337	1
ENSG00000162458	FBLIM1	filamin binding LIM protein 1	chr1	-0.665288	7.26169	1
ENSG00000132604	TERF2	telomeric repeat binding factor 2	chr16	0.58856	7.58074	1
ENSG00000148468	FAM171A1	family with sequence similarity 171 member A1	chr10	0.297326	8.03669	1
ENSG00000109814	UGDH	UDP-glucose 6-dehydrogenase	chr4	0.988963	8.26446	1
ENSG00000114302	PRKAR2A	protein kinase cAMP-dependent type II regulatory subunit alpha	chr3	0.609412	8.42502	1
ENSG00000197451	HNRNPAB	heterogeneous nuclear ribonucleoprotein A/B	chr5	1.01761	8.72007	1
ENSG00000251562	MALAT1	metastasis associated lung adenocarcinoma transcript 1 (non-protein coding)	chr11	0.188147	12.8442	1
ENSG00000103423	DNAJA3	DnaJ heat shock protein family (Hsp40) member A3	chr16	0.591213	7.2938	1
ENSG00000177426	TGIF1	TGFB induced factor homeobox 1	chr18	0.704591	7.44944	1
ENSG00000275052	PPP4R3B	protein phosphatase 4 regulatory subunit 3B	chr2	0.358749	8.00546	1
ENSG00000143476	DTL	denticleless E3 ubiquitin protein ligase homolog	chr1	0.880869	7.10394	1
ENSG00000176887	SOX11	SRY-box 11	chr2	0.802701	8.94597	1
ENSG00000150687	PRSS23	protease, serine 23	chr11	0.856571	7.35259	1
ENSG00000182809	CRIP2	cysteine rich protein 2	chr14	-0.311203	7.44895	1
ENSG00000198146	ZNF770	zinc finger protein 770	chr15	0.901841	7.82539	1
ENSG00000146918	NCAPG2	non-SMC condensin II complex subunit G2	chr7	0.412864	7.40492	1
ENSG00000069188	SDK2	sidekick cell adhesion molecule 2	chr17	-1.01084	7.95816	1
ENSG00000215769	ARHGAP27P1	Rho GTPase activating protein 27 pseudogene 1	chr17	0.0196024	7.68883	1
ENSG00000181690	PLAG1	PLAG1 zinc finger	chr8	0.716117	7.49906	1
ENSG00000091972	CD200	CD200 molecule	chr3	0.650417	7.58761	1
ENSG00000143157	POGK	pogo transposable element with KRAB domain	chr1	0.840779	7.79118	1
ENSG00000167766	ZNF83	zinc finger protein 83	chr19	0.252681	7.71776	1
ENSG00000103502	CDIPT	CDP-diacylglycerol--inositol 3-phosphatidyltransferase	chr16	0.888439	7.61375	1
ENSG00000176973	FAM89B	family with sequence similarity 89 member B	chr11	0.765214	7.57694	1
ENSG00000172466	ZNF24	zinc finger protein 24	chr18	0.555107	8.40215	1
ENSG00000131844	MCCC2	methylcrotonoyl-CoA carboxylase 2	chr5	0.402991	7.34375	1
ENSG00000260027	HOXB7	homeobox B7	chr17	-0.615557	8.12379	1
ENSG00000182628	SKA2	spindle and kinetochore associated complex subunit 2	chr17	0.308208	7.82109	1
ENSG00000118971	CCND2	cyclin D2	chr12	-0.832766	7.93401	1
ENSG00000143401	ANP32E	acidic nuclear phosphoprotein 32 family member E	chr1	-0.0788525	8.15036	1
ENSG00000143321	HDGF	heparin binding growth factor	chr1	0.457656	8.62785	1
ENSG00000125247	TMTC4	transmembrane and tetratricopeptide repeat containing 4	chr13	0.784538	7.57723	1
ENSG00000137404	NRM	nurim (nuclear envelope membrane protein)	chr6_dbb_hap3	0.741228	7.58053	1
ENSG00000172716	SLFN11	schlafen family member 11	chr17	0.231339	7.20912	1
ENSG00000167325	RRM1	ribonucleotide reductase catalytic subunit M1	chr11	0.477971	7.89826	1
ENSG00000124795	DEK	DEK proto-oncogene	chr6	0.575558	8.47241	1
ENSG00000121152	NCAPH	non-SMC condensin I complex subunit H	chr2	0.632026	7.24336	1
ENSG00000069275	NUCKS1	nuclear casein kinase and cyclin dependent kinase substrate 1	chr1	0.27217	10.0289	1
ENSG00000058668	ATP2B4	ATPase plasma membrane Ca2+ transporting 4	chr1	-0.843639	7.87443	1
ENSG00000175745	NR2F1	nuclear receptor subfamily 2 group F member 1	chr5	-0.617408	9.61322	1
ENSG00000111206	FOXM1	forkhead box M1	chr12	0.414371	7.34989	1
ENSG00000173065	FAM222B	family with sequence similarity 222 member B	chr17	0.305167	7.94671	1
ENSG00000100281	HMGXB4	HMG-box containing 4	chr22	0.771368	7.76539	1
ENSG00000276293	PIP4K2B	phosphatidylinositol-5-phosphate 4-kinase type 2 beta	chr17	0.367856	8.43559	1
ENSG00000125835	SNRPB	small nuclear ribonucleoprotein polypeptides B and B1	chr20	0.80523	8.45645	1
ENSG00000113140	SPARC	secreted protein acidic and cysteine rich	chr5	-0.54366	10.32	1
ENSG00000108055	SMC3	structural maintenance of chromosomes 3	chr10	0.603945	8.48504	1
ENSG00000155099	TMEM55A	transmembrane protein 55A	chr8	0.3464	7.30965	1
ENSG00000253729	PRKDC	protein kinase, DNA-activated, catalytic polypeptide	chr8	0.2028	8.90844	1
ENSG00000164985	PSIP1	PC4 and SFRS1 interacting protein 1	chr9	0.132658	8.87247	1
ENSG00000101057	MYBL2	MYB proto-oncogene like 2	chr20	1.02412	7.21144	1
ENSG00000095261	PSMD5	proteasome 26S subunit, non-ATPase 5	chr9	0.321321	7.59482	1
ENSG00000183508	FAM46C	family with sequence similarity 46 member C	chr1	-0.422485	7.19117	1
ENSG00000110492	MDK	midkine (neurite growth-promoting factor 2)	chr11	-0.160413	9.33612	1
ENSG00000168264	IRF2BP2	interferon regulatory factor 2 binding protein 2	chr1	-0.698409	7.77784	1
ENSG00000156011	PSD3	pleckstrin and Sec7 domain containing 3	chr8	0.150884	7.58335	1
ENSG00000160752	FDPS	farnesyl diphosphate synthase	chr1	-0.238186	8.99043	1
ENSG00000123737	EXOSC9	exosome component 9	chr4	0.733404	7.65768	1
ENSG00000149115	TNKS1BP1	tankyrase 1 binding protein 1	chr11	0.464591	7.59456	1
ENSG00000044574	HSPA5	heat shock protein family A (Hsp70) member 5	chr9	-0.440419	8.94744	1
ENSG00000168546	GFRA2	GDNF family receptor alpha 2	chr8	0.303761	7.07963	1
ENSG00000181220	ZNF746	zinc finger protein 746	chr7	0.375347	7.15626	1
ENSG00000040275	SPDL1	spindle apparatus coiled-coil protein 1	chr5	0.7339	7.28711	1
ENSG00000083168	KAT6A	lysine acetyltransferase 6A	chr8	0.216025	8.12038	1
ENSG00000116017	ARID3A	AT-rich interaction domain 3A	chr19	-0.86157	8.31364	1
ENSG00000070761	CFAP20	cilia and flagella associated protein 20	chr16	0.939439	7.65061	1
ENSG00000143569	UBAP2L	ubiquitin associated protein 2 like	chr1	0.777592	8.32005	1
ENSG00000131779	PEX11B	peroxisomal biogenesis factor 11 beta	chr1	1.00852	7.23616	1
ENSG00000130702	MIR4758	microRNA 4758	NA	-0.965313	7.55469	1
ENSG00000095951	HIVEP1	human immunodeficiency virus type I enhancer binding protein 1	chr6	0.398006	7.17447	1
ENSG00000134901	KDELC1	KDEL motif containing 1	chr13	0.445872	7.29125	1
ENSG00000168916	ZNF608	zinc finger protein 608	chr5	-0.308671	7.78971	1
ENSG00000175265	GOLGA8A	golgin A8 family member A	chr15	-0.276738	8.17965	1
ENSG00000135902	CHRND	cholinergic receptor nicotinic delta subunit	chr2	0.642575	7.14336	1
ENSG00000178567	EPM2AIP1	EPM2A interacting protein 1	chr3	0.341186	8.05756	1
ENSG00000172667	ZMAT3	zinc finger matrin-type 3	chr3	0.875055	7.7303	1
ENSG00000092621	PHGDH	phosphoglycerate dehydrogenase	chr1	-0.179291	8.4752	1
ENSG00000116133	DHCR24	24-dehydrocholesterol reductase	chr1	-0.287677	8.62062	1
ENSG00000173917	HOXB2	homeobox B2	chr17	-0.280415	7.34504	1
ENSG00000178209	PLEC	plectin	chr8	0.395283	8.00008	1
ENSG00000143390	RFX5	regulatory factor X5	chr1	-0.109144	7.46181	1
ENSG00000175606	TMEM70	transmembrane protein 70	chr8	0.383696	7.26304	1
ENSG00000167840	ZNF232	zinc finger protein 232	chr17	0.443693	6.98279	1
ENSG00000120685	PROSER1	proline and serine rich 1	chr13	-0.0530127	7.58076	1
ENSG00000261824	LINC00662	long intergenic non-protein coding RNA 662	NA	0.892259	7.37883	1
ENSG00000154723	ATP5J	ATP synthase, H+ transporting, mitochondrial Fo complex subunit F6	chr21	0.509776	7.75716	1
ENSG00000198369	SPRED2	sprouty related EVH1 domain containing 2	chr2	0.421622	7.43602	1
ENSG00000108100	CCNY	cyclin Y	chr10	0.746801	7.88209	1
ENSG00000234127	TRIM26	tripartite motif containing 26	chr6_dbb_hap3	0.386967	7.33606	1
ENSG00000185630	PBX1	PBX homeobox 1	chr1	-0.203817	8.22832	1
ENSG00000101680	LAMA1	laminin subunit alpha 1	chr18	0.242331	8.37575	1
ENSG00000115875	SRSF7	serine and arginine rich splicing factor 7	chr2	0.675419	8.59118	1
ENSG00000186193	SAPCD2	suppressor APC domain containing 2	chr9	0.74123	6.96899	1
ENSG00000162736	NCSTN	nicastrin	chr1	0.310126	7.6072	1
ENSG00000131016	AKAP12	A-kinase anchoring protein 12	chr6	0.0226175	7.34176	1
ENSG00000111799	COL12A1	collagen type XII alpha 1 chain	chr6	-0.749243	7.00186	1
ENSG00000166803	PCLAF	PCNA clamp associated factor	chr15	0.509781	7.46669	1
ENSG00000138385	SSB	Sjogren syndrome antigen B	chr2	0.860136	8.2344	1
ENSG00000188033	ZNF490	zinc finger protein 490	chr19	-0.593324	7.69326	1
ENSG00000101224	CDC25B	cell division cycle 25B	chr20	-0.76974	7.22441	1
ENSG00000115866	DARS	aspartyl-tRNA synthetase	chr2	0.461877	8.31324	1
ENSG00000163808	KIF15	kinesin family member 15	chr3	0.531661	7.21381	1
ENSG00000186185	KIF18B	kinesin family member 18B	chr17	0.816298	7.06342	1
ENSG00000125733	TRIP10	thyroid hormone receptor interactor 10	chr19	0.867797	7.27385	1
ENSG00000123975	CKS2	CDC28 protein kinase regulatory subunit 2	chr9	-0.0960852	7.61178	1
ENSG00000128951	DUT	deoxyuridine triphosphatase	chr15	0.608132	7.59513	1
ENSG00000170899	GSTA4	glutathione S-transferase alpha 4	chr6	0.0873768	7.9021	1
ENSG00000176208	ATAD5	ATPase family, AAA domain containing 5	chr17	0.878305	7.43574	1
ENSG00000143416	SELENBP1	selenium binding protein 1	chr1	0.330495	7.73435	1
ENSG00000161800	RACGAP1	Rac GTPase activating protein 1	chr12	0.437912	7.13315	1
ENSG00000143319	ISG20L2	interferon stimulated exonuclease gene 20 like 2	chr1	0.80304	7.62123	1
ENSG00000277150	F8A3	coagulation factor VIII-associated 3	NA	0.401159	7.03001	1
ENSG00000128463	EMC4	ER membrane protein complex subunit 4	chr15	0.503306	7.91178	1
ENSG00000178498	DTX3	deltex E3 ubiquitin ligase 3	chr12	-0.0418412	7.58529	1
ENSG00000198825	INPP5F	inositol polyphosphate-5-phosphatase F	chr10	0.972763	7.5527	1
ENSG00000060982	BCAT1	branched chain amino acid transaminase 1	chr12	-0.521193	8.40604	1
ENSG00000173207	CKS1B	CDC28 protein kinase regulatory subunit 1B	chr1	0.465543	7.55483	1
ENSG00000162607	USP1	ubiquitin specific peptidase 1	chr1	0.835893	7.66135	1
ENSG00000164144	ARFIP1	ADP ribosylation factor interacting protein 1	chr4	0.751941	7.55169	1
ENSG00000141582	CBX4	chromobox 4	chr17	0.584579	7.41681	1
ENSG00000184205	TSPYL2	TSPY like 2	chrX	0.908479	7.31459	1
ENSG00000166348	USP54	ubiquitin specific peptidase 54	chr10	0.357499	7.38487	1
ENSG00000216775	LOC730101	uncharacterized LOC730101	NA	0.376	6.93529	1
ENSG00000147874	HAUS6	HAUS augmin like complex subunit 6	chr9	0.788802	7.75625	1
ENSG00000134324	LPIN1	lipin 1	chr2	-0.637361	7.71559	1
ENSG00000166340	TPP1	tripeptidyl peptidase 1	chr11	0.484875	7.80147	1
ENSG00000012048	BRCA1	BRCA1, DNA repair associated	chr17	0.680259	7.45821	1
ENSG00000185619	PCGF3	polycomb group ring finger 3	chr4	0.272016	7.7511	1
ENSG00000165006	UBAP1	ubiquitin associated protein 1	chr9	0.15477	7.47979	1
ENSG00000131508	UBE2D2	ubiquitin conjugating enzyme E2 D2	chr5	0.487771	8.29733	1
ENSG00000196781	TLE1	transducin like enhancer of split 1	chr9	0.586096	7.97148	1
ENSG00000170779	CDCA4	cell division cycle associated 4	chr14	1.00371	7.24589	1
ENSG00000273749	CYFIP1	cytoplasmic FMR1 interacting protein 1	chr15	0.833433	8.30614	1
ENSG00000067082	KLF6	Kruppel like factor 6	chr10	-0.440995	7.67173	1
ENSG00000171314	PGAM1	phosphoglycerate mutase 1	chr10	0.42857	9.08369	1
ENSG00000156471	PTDSS1	phosphatidylserine synthase 1	chr8	0.425075	7.64343	1
ENSG00000149485	MIR1908	microRNA 1908	NA	-0.807529	9.59532	1
ENSG00000076321	KLHL20	kelch like family member 20	chr1	-0.444955	7.63155	1
ENSG00000169188	APEX2	apurinic/apyrimidinic endodeoxyribonuclease 2	chrX	0.947019	7.18468	1
ENSG00000165655	ZNF503	zinc finger protein 503	chr10	-0.326651	7.61481	1
ENSG00000182973	CNOT10	CCR4-NOT transcription complex subunit 10	chr3	0.41594	7.83284	1
ENSG00000119777	TMEM214	transmembrane protein 214	chr2	0.494407	7.23762	1
ENSG00000141349	G6PC3	glucose-6-phosphatase catalytic subunit 3	chr17	0.546646	7.64593	1
ENSG00000164111	ANXA5	annexin A5	chr4	-0.0253819	8.61464	1
ENSG00000009954	BAZ1B	bromodomain adjacent to zinc finger domain 1B	chr7	0.406322	8.35036	1
ENSG00000055044	NOP58	NOP58 ribonucleoprotein	chr2	0.577772	8.11441	1
ENSG00000204308	RNF5	ring finger protein 5	chr6_qbl_hap6	0.37563	7.68118	1
ENSG00000168646	AXIN2	axin 2	chr17	-0.438854	7.75931	1
ENSG00000138756	BMP2K	BMP2 inducible kinase	chr4	0.621191	7.46889	1
ENSG00000119397	CNTRL	centriolin	chr9	0.813745	7.721	1
ENSG00000168765	GSTM4	glutathione S-transferase mu 4	chr1	0.730553	7.29758	1
ENSG00000108179	PPIF	peptidylprolyl isomerase F	chr10	0.477231	7.50033	1
ENSG00000079819	EPB41L2	erythrocyte membrane protein band 4.1 like 2	chr6	0.603173	8.32123	1
ENSG00000139514	SLC7A1	solute carrier family 7 member 1	chr13	0.721497	7.46751	1
ENSG00000166483	WEE1	WEE1 G2 checkpoint kinase	chr11	0.296067	7.42584	1
ENSG00000107796	ACTA2	actin, alpha 2, smooth muscle, aorta	chr10	0.701657	7.11965	1
ENSG00000124733	MEA1	male-enhanced antigen 1	chr6	0.685594	7.5667	1
ENSG00000160211	G6PD	glucose-6-phosphate dehydrogenase	chrX	0.863422	7.56266	1
ENSG00000158417	EIF5B	eukaryotic translation initiation factor 5B	chr2	0.879018	8.81621	1
ENSG00000168003	SLC3A2	solute carrier family 3 member 2	chr11	0.362313	8.02016	1
ENSG00000131473	ACLY	ATP citrate lyase	chr17	0.0720741	8.91826	1
ENSG00000124766	SOX4	SRY-box 4	chr6	-0.0858496	8.64514	1
ENSG00000185414	MRPL30	mitochondrial ribosomal protein L30	chr2	0.199322	7.58494	1
ENSG00000234456	MAGI2-AS3	MAGI2 antisense RNA 3	NA	0.486262	7.15236	1
ENSG00000148942	SLC5A12	solute carrier family 5 member 12	chr11	0.622265	7.36471	1
ENSG00000241685	ARPC1A	actin related protein 2/3 complex subunit 1A	chr7	0.726522	8.57054	1
ENSG00000119487	MAPKAP1	mitogen-activated protein kinase associated protein 1	chr9	0.65128	7.64414	1
ENSG00000188738	FSIP2	fibrous sheath interacting protein 2	chr2	-0.0596279	7.60091	1
ENSG00000133884	DPF2	double PHD fingers 2	chr11	0.573079	7.55975	1
ENSG00000167191	GPRC5B	G protein-coupled receptor class C group 5 member B	chr16	0.19656	7.2019	1
ENSG00000006634	DBF4	DBF4 zinc finger	chr7	0.653339	7.50141	1
ENSG00000122966	MIR1178	microRNA 1178	NA	0.11789	7.32045	1
ENSG00000170345	FOS	Fos proto-oncogene, AP-1 transcription factor subunit	chr14	-0.238421	7.03652	1
ENSG00000111665	CDCA3	cell division cycle associated 3	chr12	0.295405	7.01214	1
ENSG00000166848	LOC105371348	uncharacterized LOC105371348	NA	-0.183681	7.89784	1
ENSG00000177045	SIX5	SIX homeobox 5	chr19	0.173315	7.43757	1
ENSG00000130803	ZNF317	zinc finger protein 317	chr19	0.475344	7.26745	1
ENSG00000135916	ITM2C	integral membrane protein 2C	chr2	0.44373	8.8201	1
ENSG00000159840	ZYX	zyxin	chr7	0.112687	7.92747	1
ENSG00000126822	PLEKHG3	pleckstrin homology and RhoGEF domain containing G3	chr14	-0.631707	7.7079	1
ENSG00000182010	RTKN2	rhotekin 2	chr10	0.796768	7.23063	1
ENSG00000123213	NLN	neurolysin	chr5	0.196494	7.43978	1
ENSG00000146278	PNRC1	proline rich nuclear receptor coactivator 1	chr6	1.03113	8.06608	1
ENSG00000184445	KNTC1	kinetochore associated 1	chr12	0.781194	7.45444	1
ENSG00000176454	LPCAT4	lysophosphatidylcholine acyltransferase 4	chr15	0.820794	7.45954	1
ENSG00000133606	MKRN1	makorin ring finger protein 1	chr7	0.619924	7.88855	1
ENSG00000140688	C16orf58	chromosome 16 open reading frame 58	chr16	0.602428	7.39805	1
ENSG00000151612	ZNF827	zinc finger protein 827	chr4	-0.837676	7.52093	1
ENSG00000187240	DYNC2H1	dynein cytoplasmic 2 heavy chain 1	chr11	-0.484816	7.9425	1
ENSG00000137868	STRA6	stimulated by retinoic acid 6	chr15	-0.823145	7.84773	1
ENSG00000165410	CFL2	cofilin 2	chr14	0.308075	7.86579	1
ENSG00000133059	DSTYK	dual serine/threonine and tyrosine protein kinase	chr1	0.813883	7.89787	1
ENSG00000018189	RUFY3	RUN and FYVE domain containing 3	chr4	-0.863935	8.07842	1
ENSG00000136925	TSTD2	thiosulfate sulfurtransferase like domain containing 2	chr9	0.344631	7.22194	1
ENSG00000165801	ARHGEF40	Rho guanine nucleotide exchange factor 40	chr14	-0.428313	7.95889	1
ENSG00000166004	CEP295	centrosomal protein 295	chr11	0.280674	7.42418	1
ENSG00000035499	DEPDC1B	DEP domain containing 1B	chr5	0.464718	7.22214	1
ENSG00000036054	TBC1D23	TBC1 domain family member 23	chr3	0.825396	7.34139	1
ENSG00000171444	MCC	mutated in colorectal cancers	chr5	0.40821	7.16173	1
ENSG00000164754	MIR3610	microRNA 3610	NA	-0.280733	8.76939	1
ENSG00000148400	NOTCH1	notch 1	chr9	0.958718	7.90633	1
ENSG00000172534	HCFC1	host cell factor C1	chrX	0.227427	8.26867	1
ENSG00000165175	MID1IP1	MID1 interacting protein 1	chrX	0.611314	7.69277	1
ENSG00000164815	ORC5	origin recognition complex subunit 5	chr7	0.927934	7.11371	1
ENSG00000205339	IPO7	importin 7	chr11	0.422597	8.50935	1
ENSG00000138398	PPIG	peptidylprolyl isomerase G	chr2	0.585706	8.88641	1
ENSG00000166750	SLFN5	schlafen family member 5	chr17	0.665935	7.23173	1
ENSG00000174136	RGMB	repulsive guidance molecule family member b	chr5	-0.345315	7.20902	1
ENSG00000111674	ENO2	enolase 2	chr12	0.413859	7.27658	1
ENSG00000115163	CENPA	centromere protein A	chr2	0.594474	6.95443	1
ENSG00000168785	TSPAN5	tetraspanin 5	chr4	-0.164143	7.47096	1
ENSG00000136450	SRSF1	serine and arginine rich splicing factor 1	chr17	0.710198	8.53242	1
ENSG00000103018	CYB5B	cytochrome b5 type B	chr16	-0.262562	8.0736	1
ENSG00000135862	LAMC1	laminin subunit gamma 1	chr1	0.348947	9.84885	1
ENSG00000152818	UTRN	utrophin	chr6	-0.0464828	8.1198	1
ENSG00000277203	F8A1	coagulation factor VIII-associated 1	chrX	0.331709	6.99907	1
ENSG00000166197	NOLC1	nucleolar and coiled-body phosphoprotein 1	chr10	0.438597	7.89521	1
ENSG00000148700	ADD3	adducin 3	chr10	-0.0129592	8.30512	1
ENSG00000186063	AIDA	axin interactor, dorsalization associated	chr1	0.279101	8.02482	1
ENSG00000064313	TAF2	TATA-box binding protein associated factor 2	chr8	0.399388	7.74839	1
ENSG00000122877	EGR2	early growth response 2	chr10	0.632937	6.90754	1
ENSG00000063587	LOC105373378	uncharacterized LOC105373378	NA	0.62856	7.20434	1
ENSG00000274333	LOC102724219	uncharacterized LOC102724219	NA	0.768226	8.46174	1
ENSG00000160285	LSS	lanosterol synthase	chr21	-0.471158	8.31757	1
ENSG00000073169	SELENOO	selenoprotein O	chr22	0.754493	7.14201	1
ENSG00000184226	PCDH9	protocadherin 9	chr13	-0.975474	6.97678	1
ENSG00000148343	MIGA2	mitoguardin 2	chr9	0.576933	7.04321	1
ENSG00000162063	CCNF	cyclin F	chr16	0.623736	7.10119	1
ENSG00000108511	HOXB6	homeobox B6	chr17	-0.636211	7.66313	1
ENSG00000173706	HEG1	heart development protein with EGF like domains 1	chr3	0.274682	7.66837	1
ENSG00000146731	CCT6A	chaperonin containing TCP1 subunit 6A	chr7	0.935604	8.97735	1
ENSG00000277991	LOC102723360	uncharacterized LOC102723360	NA	0.789052	8.45154	1
ENSG00000111785	RIC8B	RIC8 guanine nucleotide exchange factor B	chr12	0.915059	7.59177	1
ENSG00000111860	CEP85L	centrosomal protein 85 like	chr6	0.426508	7.79844	1
ENSG00000213347	MXD3	MAX dimerization protein 3	chr5	0.717051	6.96998	1
ENSG00000081913	PHLPP1	PH domain and leucine rich repeat protein phosphatase 1	chr18	0.794352	7.1242	1
ENSG00000167601	AXL	AXL receptor tyrosine kinase	chr19	-0.05466	7.30571	1
ENSG00000077942	FBLN1	fibulin 1	chr22	-0.155814	9.22356	1
ENSG00000159164	SV2A	synaptic vesicle glycoprotein 2A	chr1	0.394823	7.70683	1
ENSG00000172725	CORO1B	coronin 1B	chr11	0.62488	7.66659	1
ENSG00000133119	RFC3	replication factor C subunit 3	chr13	0.944402	7.27212	1
ENSG00000143190	POU2F1	POU class 2 homeobox 1	chr1	-0.093136	8.07159	1
ENSG00000159086	PAXBP1	PAX3 and PAX7 binding protein 1	chr21	0.403095	8.25706	1
ENSG00000167614	TTYH1	tweety family member 1	chr19	0.894826	7.90989	1
ENSG00000140450	ARRDC4	arrestin domain containing 4	chr15	-0.588217	7.63132	1
ENSG00000180447	GAS1	growth arrest specific 1	chr9	0.276625	6.95804	1
ENSG00000106462	EZH2	enhancer of zeste 2 polycomb repressive complex 2 subunit	chr7	0.209933	7.84371	1
ENSG00000163104	SMARCAD1	SWI/SNF-related, matrix-associated actin-dependent regulator of chromatin, subfamily a, containing DEAD/H box 1	chr4	0.806214	7.82783	1
ENSG00000160200	CBS	cystathionine-beta-synthase	chr21	0.176537	8.07613	1
ENSG00000215252	GOLGA8A	golgin A8 family member A	chr15	-0.459299	8.22288	1
ENSG00000150893	FREM2	FRAS1 related extracellular matrix protein 2	chr13	1.03435	7.74446	1
ENSG00000214160	ALG3	ALG3, alpha-1,3- mannosyltransferase	chr3	0.56286	7.13515	1
ENSG00000274276	CBSL	cystathionine-beta-synthase like	NA	0.145006	8.04039	1
ENSG00000180530	NRIP1	nuclear receptor interacting protein 1	chr21	-0.113411	8.05188	1
ENSG00000147162	OGT	O-linked N-acetylglucosamine (GlcNAc) transferase	chrX	0.114185	8.62689	1
ENSG00000271601	LIX1L	limb and CNS expressed 1 like	chr1	-0.105554	7.72827	1
ENSG00000135473	PAN2	PAN2 poly(A) specific ribonuclease subunit	chr12	0.353069	7.16853	1
ENSG00000110693	MIR6073	microRNA 6073	NA	-0.0487709	7.60471	1
ENSG00000115966	ATF2	activating transcription factor 2	chr2	0.336056	7.87	1
ENSG00000004864	SLC25A13	solute carrier family 25 member 13	chr7	-0.245146	8.01553	1
ENSG00000117713	ARID1A	AT-rich interaction domain 1A	chr1	0.651655	8.845	1
ENSG00000172081	MOB3A	MOB kinase activator 3A	chr19	0.0474218	7.26817	1
ENSG00000151502	VPS26B	VPS26, retromer complex component B	chr11	0.0434481	7.50932	1
ENSG00000155008	APOOL	apolipoprotein O like	chrX	0.332662	7.34825	1
ENSG00000204386	NEU1	neuraminidase 1	chr6_dbb_hap3	-0.743963	7.80275	1
ENSG00000214517	PPME1	protein phosphatase methylesterase 1	chr11	0.828719	7.41984	1
ENSG00000104549	SQLE	squalene epoxidase	chr8	-0.447304	8.42905	1
ENSG00000039523	RIPOR1	RHO family interacting cell polarization regulator 1	chr16	0.719862	7.38515	1
ENSG00000137563	GGH	gamma-glutamyl hydrolase	chr8	-0.454089	7.86022	1
ENSG00000162434	JAK1	Janus kinase 1	chr1	0.189893	7.65797	1
ENSG00000067064	IDI1	isopentenyl-diphosphate delta isomerase 1	chr10	-0.0929114	8.72569	1
ENSG00000126247	CAPNS1	calpain small subunit 1	chr19	0.516906	9.04767	1
ENSG00000123473	STIL	SCL/TAL1 interrupting locus	chr1	0.766766	7.12272	1
ENSG00000260807	LMF1	lipase maturation factor 1	chr16	-0.178151	7.06565	1
ENSG00000173517	PEAK1	pseudopodium enriched atypical kinase 1	chr15	0.156688	7.57739	1
ENSG00000111364	DDX55	DEAD-box helicase 55	chr12	0.9019	7.44788	1
ENSG00000144834	TAGLN3	transgelin 3	chr3	0.79425	7.00726	1
ENSG00000138336	TET1	tet methylcytosine dioxygenase 1	chr10	-0.285799	8.00357	1
ENSG00000118922	KLF12	Kruppel like factor 12	chr13	-0.877308	7.36615	1
ENSG00000141622	RNF165	ring finger protein 165	chr18	0.863598	7.85429	1
ENSG00000113648	H2AFY	H2A histone family member Y	chr5	0.897825	8.61852	1
ENSG00000138688	KIAA1109	KIAA1109	chr4	-0.693147	7.85146	1
ENSG00000114988	LMAN2L	lectin, mannose binding 2 like	chr2	-0.379278	7.12616	1
ENSG00000126603	GLIS2	GLIS family zinc finger 2	chr16	-0.713419	7.1979	1
ENSG00000146592	CREB5	cAMP responsive element binding protein 5	chr7	0.176711	7.07291	1
ENSG00000115963	RND3	Rho family GTPase 3	chr2	0.913484	7.00268	1
ENSG00000183354	KIAA2026	KIAA2026	chr9	-0.201932	7.66495	1
ENSG00000129810	SGO1	shugoshin 1	chr3	0.609573	7.13745	1
ENSG00000091986	CCDC80	coiled-coil domain containing 80	chr3	-0.654986	8.15526	1
ENSG00000157796	WDR19	WD repeat domain 19	chr4	-0.408935	7.38534	1
ENSG00000188610	FAM72B	family with sequence similarity 72 member B	chr1	0.691925	7.01832	1
ENSG00000134775	FHOD3	formin homology 2 domain containing 3	chr18	-0.384295	7.31067	1
ENSG00000171940	ZNF217	zinc finger protein 217	chr20	-0.186223	7.24308	1
ENSG00000110066	KMT5B	lysine methyltransferase 5B	chr11	-0.334148	7.87093	1
ENSG00000142156	COL6A1	collagen type VI alpha 1 chain	chr21	-0.341323	8.34072	1
ENSG00000198707	CEP290	centrosomal protein 290	chr12	-0.0184003	7.8791	1
ENSG00000124006	OBSL1	obscurin like 1	chr2	-0.411775	7.95237	1
ENSG00000142173	COL6A2	collagen type VI alpha 2 chain	chr21	-0.313861	7.43092	1
ENSG00000169251	NMD3	NMD3 ribosome export adaptor	chr3	0.00848298	7.37932	1
ENSG00000112983	BRD8	bromodomain containing 8	chr5	-0.314728	7.63886	1
ENSG00000178177	LCORL	ligand dependent nuclear receptor corepressor like	chr4	0.484442	7.71163	1
ENSG00000100439	ABHD4	abhydrolase domain containing 4	chr14	0.350253	7.16608	1
ENSG00000196550	FAM72C	family with sequence similarity 72 member C	NA	0.691032	7.01647	1
ENSG00000130164	MIR6886	microRNA 6886	NA	-0.393938	8.49993	1
ENSG00000167535	CACNB3	calcium voltage-gated channel auxiliary subunit beta 3	chr12	0.158033	7.52995	1
ENSG00000196123	KIAA0895L	KIAA0895 like	chr16	-0.0303443	7.36912	1
ENSG00000161202	DVL3	dishevelled segment polarity protein 3	chr3	0.431467	8.04773	1
ENSG00000110925	CSRNP2	cysteine and serine rich nuclear protein 2	chr12	0.618289	7.66991	1
ENSG00000243244	STON1	stonin 1	chr2	0.728762	7.11948	1
ENSG00000182934	SRPRA	SRP receptor alpha subunit	chr11	0.421081	7.4174	1
ENSG00000033800	PIAS1	protein inhibitor of activated STAT 1	chr15	-0.0441543	8.18911	1
ENSG00000022267	FHL1	four and a half LIM domains 1	chrX	-0.0933428	7.56452	1
ENSG00000265354	TIMM23	translocase of inner mitochondrial membrane 23	chr10	0.804335	7.48901	1
ENSG00000186591	UBE2H	ubiquitin conjugating enzyme E2 H	chr7	0.373103	8.55155	1
ENSG00000037042	TUBG2	tubulin gamma 2	chr17	0.186892	7.30794	1
ENSG00000115365	LANCL1	LanC like 1	chr2	-0.0891953	7.69925	1
ENSG00000065357	DGKA	diacylglycerol kinase alpha	chr12	0.475082	7.10473	1
ENSG00000125945	ZNF436	zinc finger protein 436	chr1	-0.133473	6.9315	1
ENSG00000189159	JPT1	Jupiter microtubule associated homolog 1	chr17	0.689417	8.17596	1
ENSG00000132970	WASF3	WAS protein family member 3	chr13	-0.345376	7.4396	1
ENSG00000105810	CDK6	cyclin dependent kinase 6	chr7	0.948389	7.54823	1
ENSG00000009413	REV3L	REV3 like, DNA directed polymerase zeta catalytic subunit	chr6	0.341494	7.78225	1
ENSG00000163507	KIAA1524	KIAA1524	chr3	0.923835	7.08104	1
ENSG00000168078	PBK	PDZ binding kinase	chr8	0.290971	7.04916	1
ENSG00000023041	ZDHHC6	zinc finger DHHC-type containing 6	chr10	0.521921	7.24725	1
ENSG00000183020	AP2A2	adaptor related protein complex 2 alpha 2 subunit	chr11	0.325637	7.94128	1
ENSG00000111731	C2CD5	C2 calcium dependent domain containing 5	chr12	0.323378	7.46747	1
ENSG00000110060	PUS3	pseudouridylate synthase 3	chr11	0.649885	7.01343	1
ENSG00000176542	USF3	upstream transcription factor family member 3	chr3	-0.443176	7.21384	1
ENSG00000067225	PKM	pyruvate kinase, muscle	chr15	0.914803	9.7306	1
ENSG00000087157	PGS1	phosphatidylglycerophosphate synthase 1	chr17	0.529613	7.1815	1
ENSG00000247809	NR2F2-AS1	NR2F2 antisense RNA 1	NA	0.696043	7.60442	1
ENSG00000130340	SNX9	sorting nexin 9	chr6	-0.272561	7.29392	1
ENSG00000033867	SLC4A7	solute carrier family 4 member 7	chr3	0.977141	7.92998	1
ENSG00000118496	FBXO30	F-box protein 30	chr6	0.518021	7.33125	1
ENSG00000212694	LINC01089	long intergenic non-protein coding RNA 1089	NA	-0.216747	7.26255	1
ENSG00000109920	FNBP4	formin binding protein 4	chr11	0.269118	8.41943	1
ENSG00000102763	MIR5006	microRNA 5006	NA	0.0218673	7.42464	1
ENSG00000132388	UBE2G1	ubiquitin conjugating enzyme E2 G1	chr17	0.346809	7.82847	1
ENSG00000147400	CETN2	centrin 2	chrX	-0.185988	7.35352	1
ENSG00000125952	MAX	MYC associated factor X	chr14	0.709851	7.35521	1
ENSG00000196935	SRGAP1	SLIT-ROBO Rho GTPase activating protein 1	chr12	-0.413262	7.27225	1
ENSG00000111726	CMAS	cytidine monophosphate N-acetylneuraminic acid synthetase	chr12	0.545497	7.52408	1
ENSG00000044090	CUL7	cullin 7	chr6	0.461328	7.51258	1
ENSG00000174442	ZWILCH	zwilch kinetochore protein	chr15	0.450866	7.46103	1
ENSG00000154277	UCHL1	ubiquitin C-terminal hydrolase L1	chr4	-0.000268535	8.81057	1
ENSG00000130177	CDC16	cell division cycle 16	chr13	-0.252812	7.87996	1
ENSG00000157657	ZNF618	zinc finger protein 618	chr9	0.259711	8.30167	1
ENSG00000079616	KIF22	kinesin family member 22	chr16	0.417997	7.12089	1
ENSG00000144655	CSRNP1	cysteine and serine rich nuclear protein 1	chr3	-0.150237	6.83624	1
ENSG00000197702	PARVA	parvin alpha	chr11	0.722628	7.10987	1
ENSG00000139168	ZCRB1	zinc finger CCHC-type and RNA binding motif containing 1	chr12	0.635032	7.69255	1
ENSG00000198830	HMGN2	high mobility group nucleosomal binding domain 2	chr1	-0.544521	8.60933	1
ENSG00000187535	IFT140	intraflagellar transport 140	chr16	0.0231167	7.08057	1
ENSG00000184005	ST6GALNAC3	ST6 N-acetylgalactosaminide alpha-2,6-sialyltransferase 3	chr1	0.878354	7.13591	1
ERCC-00062	NA	NA	NA	0.537177	6.81575	1
ENSG00000184677	ZBTB40	zinc finger and BTB domain containing 40	chr1	0.325245	7.14936	1
ENSG00000010219	DYRK4	dual specificity tyrosine phosphorylation regulated kinase 4	chr12	0.819443	7.05774	1
ENSG00000109107	ALDOC	aldolase, fructose-bisphosphate C	chr17	-0.238002	7.56571	1
ENSG00000171467	ZNF318	zinc finger protein 318	chr6	0.473218	7.31744	1
ENSG00000148484	RSU1	Ras suppressor protein 1	chr10	0.534004	7.2702	1
ENSG00000123636	BAZ2B	bromodomain adjacent to zinc finger domain 2B	chr2	0.143187	8.6223	1
ENSG00000255690	TRIL	TLR4 interactor with leucine rich repeats	chr7	-0.852037	7.65361	1
ENSG00000138107	ACTR1A	ARP1 actin-related protein 1 homolog A, centractin alpha	chr10	0.527774	8.04345	1
ENSG00000173905	GOLIM4	golgi integral membrane protein 4	chr3	-0.19256	7.8657	1
ENSG00000115145	STAM2	signal transducing adaptor molecule 2	chr2	-0.0857996	7.07535	1
ENSG00000018408	WWTR1	WW domain containing transcription regulator 1	chr3	0.826609	7.72056	1
ENSG00000121940	CLCC1	chloride channel CLIC like 1	chr1	0.199454	7.32989	1
ENSG00000132639	SNAP25	synaptosome associated protein 25	chr20	0.786047	7.25078	1
ENSG00000184867	ARMCX2	armadillo repeat containing, X-linked 2	chrX	-0.832911	7.27151	1
ENSG00000171365	CLCN5	chloride voltage-gated channel 5	chrX	0.980059	7.3907	1
ENSG00000026025	VIM	vimentin	chr10	-0.500391	11.7626	1
ENSG00000085644	ZNF213	zinc finger protein 213	chr16	0.676361	6.95886	1
ENSG00000106211	HSPB1	heat shock protein family B (small) member 1	chr7	0.66983	7.94846	1
ENSG00000226950	DANCR	differentiation antagonizing non-protein coding RNA	NA	-0.368949	7.50858	1
ENSG00000140987	ZSCAN32	zinc finger and SCAN domain containing 32	chr16	0.257124	6.98057	1
ENSG00000165424	ZCCHC24	zinc finger CCHC-type containing 24	chr10	0.330311	7.99664	1
ENSG00000198951	NAGA	alpha-N-acetylgalactosaminidase	chr22	0.417049	7.06736	1
ENSG00000130766	SESN2	sestrin 2	chr1	0.377897	7.04652	1
ENSG00000091651	ORC6	origin recognition complex subunit 6	chr16	1.00484	7.31704	1
ENSG00000166435	XRRA1	X-ray radiation resistance associated 1	chr11	0.440303	7.03609	1
ENSG00000135506	OS9	OS9, endoplasmic reticulum lectin	chr12	0.702865	7.99746	1
ENSG00000255529	POLR2M	RNA polymerase II subunit M	chr15	0.198656	7.49423	1
ENSG00000254726	MEX3A	mex-3 RNA binding family member A	chr1	0.730636	9.66998	1
ENSG00000125818	PSMF1	proteasome inhibitor subunit 1	chr20	0.792353	7.72264	1
ENSG00000272333	KMT2B	lysine methyltransferase 2B	chr19	0.533187	7.27525	1
ENSG00000125848	FLRT3	fibronectin leucine rich transmembrane protein 3	chr20	0.698821	7.22419	1
ENSG00000135547	HEY2	hes related family bHLH transcription factor with YRPW motif 2	chr6	0.0685054	7.09798	1
ENSG00000100614	PPM1A	protein phosphatase, Mg2+/Mn2+ dependent 1A	chr14	-0.0406819	7.51916	1
ENSG00000138764	CCNG2	cyclin G2	chr4	-0.217746	7.83149	1
ENSG00000086061	DNAJA1	DnaJ heat shock protein family (Hsp40) member A1	chr9	0.57511	8.30278	1
ENSG00000104218	CSPP1	centrosome and spindle pole associated protein 1	chr8	0.208254	7.45866	1
ENSG00000140264	SERF2	small EDRK-rich factor 2	chr15	0.410913	8.53664	1
ENSG00000119729	RHOQ	ras homolog family member Q	chr2	0.0478723	7.66249	1
ENSG00000156103	MMP16	matrix metallopeptidase 16	chr8	0.596771	7.63322	1
ENSG00000112210	RAB23	RAB23, member RAS oncogene family	chr6	0.202239	7.29947	1
ENSG00000129480	DTD2	D-tyrosyl-tRNA deacylase 2 (putative)	chr14	0.472819	6.98268	1
ENSG00000126804	ZBTB1	zinc finger and BTB domain containing 1	chr14	0.247485	7.16011	1
ENSG00000097007	ABL1	ABL proto-oncogene 1, non-receptor tyrosine kinase	chr9	0.392369	7.66534	1
ENSG00000173674	LOC107984923	eukaryotic translation initiation factor 1A, X-chromosomal	NA	0.260806	8.03158	1
ENSG00000157570	TSPAN18	tetraspanin 18	chr11	0.430733	7.58805	1
ENSG00000136367	ZFHX2	zinc finger homeobox 2	chr14	-0.482118	7.09981	1
ENSG00000005882	PDK2	pyruvate dehydrogenase kinase 2	chr17	0.548284	7.04387	1
ENSG00000187266	EPOR	erythropoietin receptor	chr19	0.092932	6.8019	1
ENSG00000113657	DPYSL3	dihydropyrimidinase like 3	chr5	-0.136108	7.98831	1
ENSG00000121211	MND1	meiotic nuclear divisions 1	chr4	0.845558	7.13157	1
ENSG00000197579	TOPORS	TOP1 binding arginine/serine rich protein	chr9	0.130094	7.51152	1
ENSG00000007545	CRAMP1	cramped chromatin regulator homolog 1	chr16	0.661229	7.19606	1
ENSG00000113441	LNPEP	leucyl and cystinyl aminopeptidase	chr5	-0.1539	7.61381	1
ENSG00000170921	TANC2	tetratricopeptide repeat, ankyrin repeat and coiled-coil containing 2	chr17	-0.0261035	7.70555	1
ENSG00000186814	ZSCAN30	zinc finger and SCAN domain containing 30	chr18	-0.162694	7.22201	1
ENSG00000073111	MCM2	minichromosome maintenance complex component 2	chr3	1.0256	7.44844	1
ENSG00000178573	MAF	MAF bZIP transcription factor	chr16	-0.449135	6.83568	1
ENSG00000138180	CEP55	centrosomal protein 55	chr10	0.565815	6.99802	1
ENSG00000095015	MAP3K1	mitogen-activated protein kinase kinase kinase 1	chr5	0.866911	7.54737	1
ENSG00000166478	ZNF143	zinc finger protein 143	chr11	0.167001	7.05305	1
ENSG00000035928	RFC1	replication factor C subunit 1	chr4	0.393021	7.83837	1
ENSG00000152926	ZNF117	zinc finger protein 117	chr7	0.329416	7.45346	1
ENSG00000069702	TGFBR3	transforming growth factor beta receptor 3	chr1	0.919947	7.69193	1
ENSG00000145391	SETD7	SET domain containing lysine methyltransferase 7	chr4	0.277774	7.30347	1
ENSG00000188807	TMEM201	transmembrane protein 201	chr1	0.720202	6.99545	1
ENSG00000162980	ARL5A	ADP ribosylation factor like GTPase 5A	chr2	0.598295	8.10593	1
ENSG00000106290	TAF6	TATA-box binding protein associated factor 6	chr7	0.342721	7.77357	1
ENSG00000215784	FAM72D	family with sequence similarity 72 member D	chr1	0.668173	6.96902	1
ENSG00000140577	CRTC3	CREB regulated transcription coactivator 3	chr15	0.566273	7.28874	1
ENSG00000101871	MID1	midline 1	chrX	-0.205796	7.15185	1
ENSG00000275004	ZNF280B	zinc finger protein 280B	chr22	0.45633	6.98955	1
ENSG00000115504	EHBP1	EH domain binding protein 1	chr2	0.376386	7.68051	1
ENSG00000204209	DAXX	death domain associated protein	chr6_dbb_hap3	0.600984	7.39768	1
ENSG00000101447	FAM83D	family with sequence similarity 83 member D	chr20	0.598945	6.92576	1
ENSG00000213160	PHOSPHO2-KLHL23	PHOSPHO2-KLHL23 readthrough	chr2	0.395369	7.92274	1
ENSG00000087274	ADD1	adducin 1	chr4	0.312862	8.59429	1
ENSG00000136854	STXBP1	syntaxin binding protein 1	chr9	0.326589	7.70715	1
ENSG00000150907	FOXO1	forkhead box O1	chr13	0.826942	7.28454	1
ENSG00000186522	2010-09-01	septin 10	chr2	0.150643	7.7856	1
ENSG00000114573	ATP6V1A	ATPase H+ transporting V1 subunit A	chr3	-0.174909	8.2993	1
ENSG00000181827	RFX7	regulatory factor X7	chr15	-0.234822	7.84717	1
ENSG00000205542	TMSB4X	thymosin beta 4, X-linked	chrX	-0.435148	8.93016	1
ENSG00000147180	ZNF711	zinc finger protein 711	chrX	0.238454	7.5303	1
ENSG00000196230	TUBB	tubulin beta class I	chr6_dbb_hap3	0.603321	11.6045	1
ENSG00000075624	ACTB	actin beta	chr7	0.303708	11.4566	1
ENSG00000112335	SNX3	sorting nexin 3	chr6	0.197222	7.95463	1
ENSG00000198604	BAZ1A	bromodomain adjacent to zinc finger domain 1A	chr14	0.907044	8.44806	1
ENSG00000167380	ZNF226	zinc finger protein 226	chr19	-0.123937	7.08842	1
ENSG00000055163	CYFIP2	cytoplasmic FMR1 interacting protein 2	chr5	0.64523	7.5766	1
ENSG00000142627	EPHA2	EPH receptor A2	chr1	0.332867	7.07579	1
ENSG00000135968	GCC2	GRIP and coiled-coil domain containing 2	chr2	0.281694	7.67029	1
ENSG00000130958	SLC35D2	solute carrier family 35 member D2	chr9	0.739041	7.29965	1
ENSG00000140836	ZFHX3	zinc finger homeobox 3	chr16	0.706844	8.6705	1
ENSG00000007866	TEAD3	TEA domain transcription factor 3	chr6	0.279191	7.43292	1
ENSG00000247626	MARS2	methionyl-tRNA synthetase 2, mitochondrial	chr2	0.793215	6.8348	1
ENSG00000158402	CDC25C	cell division cycle 25C	chr5	0.0725316	6.97211	1
ENSG00000143842	SOX13	SRY-box 13	chr1	0.45679	7.19694	1
ENSG00000132780	NASP	nuclear autoantigenic sperm protein	chr1	0.587821	8.64624	1
ENSG00000140307	GTF2A2	general transcription factor IIA subunit 2	chr15	0.410321	7.69401	1
ENSG00000130312	MRPL34	mitochondrial ribosomal protein L34	chr19	0.491233	7.17497	1
ENSG00000189403	HMGB1	high mobility group box 1	chr13	0.472734	10.0211	1
ENSG00000151503	NCAPD3	non-SMC condensin II complex subunit D3	chr11	0.773631	7.2073	1
ENSG00000165304	MELK	maternal embryonic leucine zipper kinase	chr9	0.223722	7.31179	1
ENSG00000198919	DZIP3	DAZ interacting zinc finger protein 3	chr3	-0.25281	7.78917	1
ENSG00000095397	WHRN	whirlin	chr9	0.205094	6.88193	1
ENSG00000198732	SMOC1	SPARC related modular calcium binding 1	chr14	-0.283526	7.12655	1
ENSG00000171223	JUNB	JunB proto-oncogene, AP-1 transcription factor subunit	chr19	0.737741	7.04717	1
ENSG00000150760	DOCK1	dedicator of cytokinesis 1	chr10	0.494576	7.78241	1
ENSG00000232677	LINC00665	long intergenic non-protein coding RNA 665	NA	0.301705	6.84936	1
ENSG00000177879	AP3S1	adaptor related protein complex 3 sigma 1 subunit	chr5	0.268177	7.74303	1
ENSG00000145220	LYAR	Ly1 antibody reactive	chr4	0.852354	7.12528	1
ENSG00000149084	HSD17B12	hydroxysteroid 17-beta dehydrogenase 12	chr11	0.0393149	7.65993	1
ENSG00000075391	RASAL2	RAS protein activator like 2	chr1	0.440361	7.42333	1
ENSG00000154359	LONRF1	LON peptidase N-terminal domain and ring finger 1	chr8	0.233899	7.36227	1
ENSG00000165495	PKNOX2	PBX/knotted 1 homeobox 2	chr11	-0.379028	7.42254	1
ENSG00000196922	ZNF252P	zinc finger protein 252, pseudogene	chr8	0.158896	7.04887	1
ENSG00000113522	RAD50	RAD50 double strand break repair protein	chr5	0.701764	6.9024	1
ENSG00000147130	ZMYM3	zinc finger MYM-type containing 3	chrX	0.631441	8.31259	1
ENSG00000135052	GOLM1	golgi membrane protein 1	chr9	-0.398787	8.16441	1
ENSG00000109458	GAB1	GRB2 associated binding protein 1	chr4	0.3553	7.2242	1
ENSG00000139200	PIANP	PILR alpha associated neural protein	chr12	0.490497	6.91763	1
ENSG00000161542	PRPSAP1	phosphoribosyl pyrophosphate synthetase associated protein 1	chr17	-0.245618	7.69428	1
ENSG00000167770	OTUB1	OTU deubiquitinase, ubiquitin aldehyde binding 1	chr11	0.175298	8.08193	1
ENSG00000182858	ALG12	ALG12, alpha-1,6-mannosyltransferase	chr22	0.265182	7.09289	1
ENSG00000075975	MKRN2	makorin ring finger protein 2	chr3	0.151038	7.28017	1
ENSG00000102804	TSC22D1	TSC22 domain family member 1	chr13	-0.493713	7.94872	1
ENSG00000125885	MCM8	minichromosome maintenance 8 homologous recombination repair factor	chr20	0.854546	7.22197	1
ENSG00000160691	SHC1	SHC adaptor protein 1	chr1	-0.281469	8.07248	1
ENSG00000185088	RPS27L	ribosomal protein S27 like	chr15	0.884027	7.82667	1
ENSG00000083123	BCKDHB	branched chain keto acid dehydrogenase E1 subunit beta	chr6	-0.547672	6.97958	1
ENSG00000112715	VEGFA	vascular endothelial growth factor A	chr6	-0.745604	6.91796	1
ENSG00000175970	MIR4700	microRNA 4700	NA	0.00711014	7.69511	1
ENSG00000141076	UTP4	UTP4, small subunit processome component	chr16	0.674186	7.47581	1
ENSG00000166685	COG1	component of oligomeric golgi complex 1	chr17	-0.0829274	7.25373	1
ENSG00000161048	NAPEPLD	N-acyl phosphatidylethanolamine phospholipase D	chr7	0.748997	7.21548	1
ENSG00000146263	MMS22L	MMS22 like, DNA repair protein	chr6	0.81395	7.33247	1
ENSG00000253293	HOXA10	homeobox A10	chr7	-0.711914	7.44656	1
ENSG00000170385	SLC30A1	solute carrier family 30 member 1	chr1	-0.0029236	6.93824	1
ENSG00000131873	CHSY1	chondroitin sulfate synthase 1	chr15	-0.125918	7.70153	1
ENSG00000110651	CD81	CD81 molecule	chr11	0.731611	8.65815	1
ENSG00000128050	PAICS	phosphoribosylaminoimidazole carboxylase and phosphoribosylaminoimidazolesuccinocarboxamide synthase	chr4	0.456622	8.62744	1
ENSG00000120068	HOXB8	homeobox B8	chr17	0.469681	7.40625	1
ENSG00000184992	BRI3BP	BRI3 binding protein	chr12	0.27105	7.20108	1
ENSG00000167182	SP2	Sp2 transcription factor	chr17	0.34502	7.05285	1
ENSG00000163728	TTC14	tetratricopeptide repeat domain 14	chr3	0.39071	7.4017	1
ENSG00000134533	RERG	RAS like estrogen regulated growth inhibitor	chr12	0.656379	6.92889	1
ENSG00000149131	SERPING1	serpin family G member 1	chr11	-0.954003	7.42512	1
ENSG00000115170	ACVR1	activin A receptor type 1	chr2	-0.383419	7.0243	1
ENSG00000169992	NLGN2	neuroligin 2	chr17	0.742099	8.93281	1
ENSG00000122257	RBBP6	RB binding protein 6, ubiquitin ligase	chr16	0.57726	8.62056	1
ENSG00000047634	SCML1	sex comb on midleg like 1 (Drosophila)	chrX	0.911266	7.66784	1
ENSG00000062716	MIR21	microRNA 21	NA	0.391043	7.63394	1
ENSG00000143614	GATAD2B	GATA zinc finger domain containing 2B	chr1	0.29315	7.63781	1
ENSG00000266412	NCOA4	nuclear receptor coactivator 4	chr10	0.312269	8.16028	1
ENSG00000051341	POLQ	DNA polymerase theta	chr3	0.766661	7.04544	1
ENSG00000175322	ZNF519	zinc finger protein 519	chr18	0.56913	7.17225	1
ENSG00000144136	SLC20A1	solute carrier family 20 member 1	chr2	0.259475	7.4692	1
ENSG00000171793	CTPS1	CTP synthase 1	chr1	0.990721	7.37413	1
ENSG00000197933	ZNF823	zinc finger protein 823	chr19	0.0598097	6.69879	1
ENSG00000109756	RAPGEF2	Rap guanine nucleotide exchange factor 2	chr4	-0.435864	7.2432	1
ENSG00000005108	THSD7A	thrombospondin type 1 domain containing 7A	chr7	-0.881041	6.88454	1
ENSG00000114861	FOXP1	forkhead box P1	chr3	0.321283	7.577	1
ENSG00000183735	TBK1	TANK binding kinase 1	chr12	0.381228	7.22633	1
ENSG00000165792	METTL17	methyltransferase like 17	chr14	0.577477	7.27885	1
ENSG00000177889	UBE2N	ubiquitin conjugating enzyme E2 N	chr12	0.613028	8.14773	1
ENSG00000165480	SKA3	spindle and kinetochore associated complex subunit 3	chr13	0.391345	6.94435	1
ENSG00000096093	EFHC1	EF-hand domain containing 1	chr6	-0.0780058	7.19461	1
ENSG00000278535	DHRS11	dehydrogenase/reductase 11	chr17	0.445039	6.79085	1
ENSG00000169635	HIC2	HIC ZBTB transcriptional repressor 2	chr22	0.0972873	7.74162	1
ENSG00000123200	ZC3H13	zinc finger CCCH-type containing 13	chr13	0.804605	8.97777	1
ENSG00000268606	MAGEA2	MAGE family member A2	chrX	0.0755111	7.58739	1
ENSG00000133710	SPINK5	serine peptidase inhibitor, Kazal type 5	chr5	-0.186881	6.79769	1
ENSG00000186260	MKL2	MKL1/myocardin like 2	chr16	-0.232328	7.51982	1
ENSG00000276023	DUSP14	dual specificity phosphatase 14	chr17	0.86704	7.19141	1
ENSG00000166888	STAT6	signal transducer and activator of transcription 6	chr12	0.356033	7.30718	1
ENSG00000136156	ITM2B	integral membrane protein 2B	chr13	0.594543	9.51698	1
ENSG00000123219	CENPK	centromere protein K	chr5	0.803921	7.08605	1
ENSG00000161904	LEMD2	LEM domain containing 2	chr6	0.319202	7.44562	1
ENSG00000050405	LIMA1	LIM domain and actin binding 1	chr12	0.281792	7.58416	1
ENSG00000139998	RAB15	RAB15, member RAS oncogene family	chr14	0.396069	6.86925	1
ENSG00000263513	FAM72C	family with sequence similarity 72 member C	NA	0.551257	6.98007	1
ENSG00000114019	AMOTL2	angiomotin like 2	chr3	0.14033	7.40603	1
ENSG00000132842	AP3B1	adaptor related protein complex 3 beta 1 subunit	chr5	-0.0470145	7.88901	1
ENSG00000196305	IARS	isoleucyl-tRNA synthetase	chr9	0.0974571	8.21766	1
ENSG00000277258	PCGF2	polycomb group ring finger 2	chr17	0.731533	8.36038	1
ENSG00000143815	LBR	lamin B receptor	chr1	-0.0263957	8.01335	1
ENSG00000004777	ARHGAP33	Rho GTPase activating protein 33	chr19	0.817209	7.29547	1
ENSG00000152518	ZFP36L2	ZFP36 ring finger protein like 2	chr2	0.372037	7.68286	1
ENSG00000166233	ARIH1	ariadne RBR E3 ubiquitin protein ligase 1	chr15	0.122173	7.80452	1
ENSG00000170264	FAM161A	family with sequence similarity 161 member A	chr2	0.385279	7.34611	1
ENSG00000118217	ATF6	activating transcription factor 6	chr1	0.743123	7.52046	1
ENSG00000182718	ANXA2	annexin A2	chr15	-0.158864	8.73349	1
ENSG00000196812	ZSCAN16	zinc finger and SCAN domain containing 16	chr6	0.0297666	6.76803	1
ENSG00000100243	CYB5R3	cytochrome b5 reductase 3	chr22	0.453396	8.28273	1
ENSG00000205571	SMN1	survival of motor neuron 1, telomeric	chr5	0.638083	7.57938	1
ENSG00000182220	ATP6AP2	ATPase H+ transporting accessory protein 2	chrX	0.116061	7.73657	1
ENSG00000111602	TIMELESS	timeless circadian clock	chr12	0.194904	7.35178	1
ENSG00000103264	FBXO31	F-box protein 31	chr16	0.164613	6.90238	1
ENSG00000117360	PRPF3	pre-mRNA processing factor 3	chr1	0.692671	7.29576	1
ENSG00000132507	EIF5A	eukaryotic translation initiation factor 5A	chr17	0.750734	8.43715	1
ENSG00000110395	CBL	Cbl proto-oncogene	chr11	0.640659	7.86653	1
ENSG00000170871	KIAA0232	KIAA0232	chr4	0.126927	7.85525	1
ENSG00000143341	HMCN1	hemicentin 1	chr1	0.73332	7.47854	1
ENSG00000055950	MRPL43	mitochondrial ribosomal protein L43	chr10	-0.0701159	7.28761	1
ENSG00000135966	TGFBRAP1	transforming growth factor beta receptor associated protein 1	chr2	0.596458	7.21873	1
ENSG00000145734	BDP1	B double prime 1, subunit of RNA polymerase III transcription initiation factor IIIB	chr5	-0.0298296	8.04838	1
ENSG00000167397	VKORC1	vitamin K epoxide reductase complex subunit 1	chr16	0.788743	7.59664	1
ENSG00000244879	MIR4712	microRNA 4712	NA	0.139206	8.70129	1
ENSG00000148943	LIN7C	lin-7 homolog C, crumbs cell polarity complex component	chr11	0.0835367	7.50694	1
ENSG00000163428	LRRC58	leucine rich repeat containing 58	chr3	0.680797	8.44174	1
ENSG00000146122	DAAM2	dishevelled associated activator of morphogenesis 2	chr6	1.01201	7.17569	1
ENSG00000120137	PANK3	pantothenate kinase 3	chr5	0.125604	8.67744	1
[truncated: 9,323 more rows]

## Sheet: GENES TO COMPARE
ENSEMBL	Symbol	logFC	logCPM	Adj.Pvalue
ENSG00000150244	TRIM48	7.08138	9.16783	1.49e-93
ENSG00000106546	AHR	4.98507	7.89493	7.67e-59
ENSG00000115844	DLX2	4.70898	7.75734	1.41e-55
ENSG00000158887	MPZ	4.65039	7.69237	1.23e-76
ENSG00000137460	FHDC1	4.55078	7.85524	2.1e-76
ENSG00000076706	MIR6756	4.50504	7.60167	6.88e-59
ENSG00000151892	GFRA1	4.48456	8.28686	4.68e-86
ENSG00000170542	SERPINB9	4.38431	7.40095	6.3e-45
ENSG00000079931	MOXD1	4.35976	8.30277	2.95e-87
ENSG00000144355	DLX1	4.32547	7.76087	4.74e-49
ENSG00000113389	NPR3	4.16231	7.48903	1.41e-41
ENSG00000143171	RXRG	4.00395	7.25891	1.63e-44
ENSG00000071991	CDH19	3.93245	7.1862	3.57e-32
ENSG00000136160	EDNRB	3.9159	7.82888	1.56e-58
ENSG00000132854	KANK4	3.83884	7.61199	1.73e-46
ENSG00000164125	FAM198B	3.81079	7.16609	2.11e-29
ENSG00000205035	LOC440040	3.7658	7.05577	8.73e-24
ENSG00000120875	DUSP4	3.75201	8.407	3.65e-63
ENSG00000048740	CELF2	3.69951	8.79071	1.07e-111
ENSG00000198598	MMP17	3.69936	7.26033	9.16e-36
ENSG00000081479	LRP2	3.61591	7.36324	3.47e-32
ENSG00000223417	TRIM49D1	3.53431	6.97474	2.02e-21
ENSG00000074416	MGLL	3.52232	7.40766	1.5e-36
ENSG00000118322	ATP10B	3.51582	6.9999	7.08e-26
ENSG00000148848	ADAM12	3.49175	7.96348	5.82e-39
ENSG00000160307	S100B	3.46611	7.35708	6.43e-34
ENSG00000125046	SSUH2	3.37868	6.97339	2.85e-19
ENSG00000153902	LGI4	3.3473	6.99484	1.07e-23
ENSG00000106278	PTPRZ1	3.31225	8.14217	7.73e-52
ENSG00000145794	MEGF10	3.29475	7.85619	3.35e-45
ENSG00000105974	CAV1	3.26872	7.12686	1.94e-16
ENSG00000065361	ERBB3	3.26848	9.16797	1.26e-117
ENSG00000077279	DCX	3.18052	7.07617	2.56e-20
ENSG00000076641	PAG1	3.14531	7.79546	1.28e-28
ENSG00000233802	TRIM49D2	3.12015	6.84806	1.44e-16
ENSG00000007237	GAS7	3.11097	8.45987	1.03e-55
ENSG00000113361	CDH6	3.07819	7.97524	4.81e-33
ENSG00000104332	SFRP1	3.07511	9.03727	4.55e-62
ENSG00000148426	PROSER2	3.00344	6.94545	2.61e-17
ENSG00000171617	ENC1	2.99642	8.44405	2.5e-41
ENSG00000172201	ID4	2.99249	7.52947	5.29e-21
ENSG00000188487	INSC	2.99072	6.8402	6.29e-20
ENSG00000168843	FSTL5	2.92826	6.85933	3.96e-17
ENSG00000128872	TMOD2	2.90175	6.97824	1.56e-18
ENSG00000186564	FOXD2	2.89896	6.81493	2.69e-17
ENSG00000162545	CAMK2N1	2.88136	7.3618	1.35e-19
ENSG00000180914	OXTR	2.87812	6.8792	2.12e-13
ENSG00000133110	POSTN	2.86912	6.901	3.32e-12
ENSG00000245526	MIR9-2	2.86265	6.80253	9.1e-16
ENSG00000132692	BCAN	2.85246	6.92707	3.79e-11
ENSG00000184564	SLITRK6	2.83633	7.7383	1.94e-13
ENSG00000102996	MMP15	2.81278	6.85166	4.08e-19
ENSG00000276203	ANKRD20A3	2.81048	7.41791	2.24e-17
ENSG00000064300	NGFR	2.77596	9.20138	6.9e-53
ENSG00000054690	PLEKHH1	2.76257	7.19541	6.88e-17
ENSG00000178695	KCTD12	2.73811	7.22173	3.36e-11
ENSG00000165912	PACSIN3	2.7251	6.97815	3.83e-19
ENSG00000182985	CADM1	2.67151	9.38081	4.56e-68
ENSG00000259417	LINC01314	2.66877	6.73458	8.18e-14
ENSG00000122574	WIPF3	2.66216	6.85849	3.66e-14
ENSG00000147588	PMP2	2.64455	6.76419	7.84e-11
ENSG00000075223	SEMA3C	2.6402	8.197	7.74e-29
ENSG00000183148	ANKRD20A2	2.6331	7.198	2.24e-13
ENSG00000164588	HCN1	2.60591	6.89784	7.35e-09
ENSG00000260691	ANKRD20A1	2.59679	7.19528	5.88e-13
ENSG00000168621	GDNF	2.58487	6.76084	4.1e-10
ENSG00000143013	LMO4	2.58143	8.97066	9.94e-52
ENSG00000164418	GRIK2	2.56294	7.06849	1.33e-11
ENSG00000156475	PPP2R2B	2.52157	6.95313	3.32e-11
ENSG00000273706	LHX1	2.50223	6.69863	5.81e-10
ENSG00000172014	ANKRD20A4	2.50057	7.24166	5.43e-12
ENSG00000010319	SEMA3G	2.48073	6.70006	1.07e-13
ENSG00000164626	KCNK5	2.46657	7.02532	7.23e-13
ENSG00000128242	GAL3ST1	2.46232	6.92119	2.21e-11
ENSG00000146013	GFRA3	2.44833	7.12565	4.93e-13
ENSG00000134323	MYCN	2.43886	9.19132	7.92e-27
ENSG00000169562	GJB1	2.43592	6.78715	9.27e-11
ENSG00000197747	S100A10	2.42791	7.35258	2.24e-18
ENSG00000172164	SNTB1	2.38259	6.86442	3.08e-09
ENSG00000178568	ERBB4	2.38129	6.85161	2.93e-09
ENSG00000091409	ITGA6	2.37063	7.74631	1.3e-18
ENSG00000167992	VWCE	2.36737	7.0228	1.44e-11
ENSG00000168386	FILIP1L	2.32715	6.99127	5.16e-09
ENSG00000198756	COLGALT2	2.32617	7.09852	3.38e-11
ENSG00000123560	PLP1	2.31314	8.96749	4.23e-35
ENSG00000153234	NR4A2	2.28899	6.72975	3.86e-08
ENSG00000169860	P2RY1	2.26828	7.11883	1.66e-10
ENSG00000114631	PODXL2	2.25717	7.3126	1.25e-10
ENSG00000121068	TBX2	2.25019	6.65556	3.97e-10
ENSG00000115232	ITGA4	2.2246	7.3078	6.46e-13
ENSG00000182103	FAM181B	2.20497	6.65083	9.36e-12
ENSG00000172458	IL17D	2.19817	6.71553	9.62e-08
ENSG00000170927	PKHD1	2.19644	6.79675	1.67e-06
ENSG00000157510	AFAP1L1	2.18418	6.76027	1.8e-08
ENSG00000154096	THY1	2.18071	7.74853	1.37e-12
ENSG00000230876	LINC00486	2.17619	10.2803	1.11e-16
ENSG00000142494	SLC47A1	2.16591	6.81011	4.64e-08
ENSG00000163235	TGFA	2.16309	6.64271	1.02e-10
ENSG00000136960	ENPP2	2.158	7.64007	8.37e-14
ENSG00000111728	ST8SIA1	2.15135	7.25422	3.34e-10
ENSG00000141441	GAREM1	2.15009	7.08886	1.23e-08
ENSG00000096433	ITPR3	2.14795	7.20254	1.95e-10
ENSG00000175274	TP53I11	2.14793	8.43098	1.99e-19
ENSG00000046653	GPM6B	2.13624	7.8116	1.08e-14
ENSG00000185634	SHC4	2.13393	6.89939	1.23e-07
ENSG00000134954	ETS1	2.1	7.8779	1.15e-13
ENSG00000138434	SSFA2	2.09806	8.27238	5.14e-18
ENSG00000188906	LRRK2	2.08905	6.68827	5.11e-08
ENSG00000171208	NETO2	2.08492	7.78443	3.01e-12
ENSG00000101638	ST8SIA5	2.06609	6.72168	1.82e-07
ENSG00000137203	TFAP2A	2.05711	8.22152	5.66e-09
ENSG00000149948	HMGA2	2.05382	9.85279	3.94e-35
ENSG00000076554	TPD52	2.0412	6.86357	2.28e-07
ENSG00000115828	QPCT	2.03261	6.87709	3.69e-06
ENSG00000105894	PTN	2.02626	9.14252	2.94e-23
ENSG00000187005	KRTAP21-1	2.02588	6.62137	3.17e-10
ENSG00000112414	ADGRG6	2.01727	8.19175	1.8e-15
ENSG00000129946	SHC2	2.01594	6.73151	6.65e-07
ENSG00000162374	ELAVL4	1.99135	6.65694	2.51e-06
ENSG00000256618	MTRNR2L1	1.98155	7.99966	4.46e-13
ENSG00000021300	PLEKHB1	1.97225	7.16266	2.81e-06
ENSG00000149177	PTPRJ	1.96101	7.09846	5.04e-07
ENSG00000144485	HES6	1.95986	7.98577	4.23e-13
ENSG00000139926	FRMD6	1.95896	7.52995	4.19e-09
ENSG00000184906	LOC101929583	1.95189	6.62443	9.34e-09
ENSG00000242808	SOX2-OT	1.94976	7.20566	6.23e-08
ENSG00000109861	CTSC	1.94884	7.57607	3.41e-10
ENSG00000011201	ANOS1	1.94485	6.71673	1.64e-05
ENSG00000107438	PDLIM1	1.93843	7.6188	2.38e-07
ENSG00000155324	GRAMD3	1.93776	7.06018	1.39e-05
ENSG00000116667	C1orf21	1.93498	7.34027	3.13e-08
ENSG00000115339	GALNT3	1.93484	6.61855	1.16e-07
ENSG00000111961	SASH1	1.92281	8.58683	1.16e-16
ENSG00000121966	CXCR4	1.91867	7.88629	6.41e-08
ENSG00000160360	GPSM1	1.91724	7.11546	1.84e-07
ENSG00000128283	CDC42EP1	1.91557	7.54892	2.45e-08
ENSG00000275342	PRAG1	1.9098	7.7314	4.41e-07
ENSG00000244509	APOBEC3C	1.90672	7.1345	4.9e-06
ENSG00000123358	NR4A1	1.90598	7.42841	6.42e-08
ENSG00000003249	DBNDD1	1.90518	7.12621	5.24e-06
ENSG00000105928	DFNA5	1.897	6.78171	2.28e-05
ENSG00000186684	CYP27C1	1.89562	6.94398	2.6e-06
ENSG00000102445	RUBCNL	1.87372	7.17371	4.62e-07
ENSG00000225581	TRIM53AP	1.87104	6.59681	1e-07
ENSG00000129595	EPB41L4A	1.8634	6.86434	8.05e-05
ENSG00000169554	ZEB2	1.8629	9.18435	8.67e-14
ENSG00000075340	ADD2	1.85067	7.02566	6.04e-05
ENSG00000184305	CCSER1	1.84801	6.66419	3.28e-06
ENSG00000007384	RHBDF1	1.84257	8.61959	1.49e-10
ENSG00000136504	KAT7	1.8371	7.86376	4.82e-09
ENSG00000185551	MIR1469	1.83405	9.24588	4.28e-18
ENSG00000212864	RNF208	1.82957	6.71539	2.71e-05
ENSG00000274628	FAM95B1	1.82929	6.71226	3.8e-05
ENSG00000165490	DDIAS	1.82234	6.72444	3.85e-05
ENSG00000175785	PRIMA1	1.81528	6.66211	6.97e-06
ENSG00000103647	CORO2B	1.81363	7.25894	4.45e-05
ENSG00000174307	PHLDA3	1.81164	6.7708	1.18e-05
ENSG00000099984	GSTT2	1.80847	6.60049	5.82e-07
ENSG00000074266	MIR6755	1.78282	7.27956	1.73e-05
ENSG00000092470	WDR76	1.78146	6.91629	0.000164535
ENSG00000110660	SLC35F2	1.77974	7.15961	0.000123451
ENSG00000067113	PLPP1	1.778	7.29077	3.47e-06
ENSG00000119403	PHF19	1.76155	7.03211	0.000131638
ENSG00000166582	CENPV	1.76099	8.02349	1.19e-09
ENSG00000081189	MEF2C	1.75951	7.46905	2.87e-06
ENSG00000165475	CRYL1	1.75454	7.82662	2.53e-06
ENSG00000164318	EGFLAM	1.74781	8.22549	9.97e-10
ENSG00000133433	GSTT2B	1.73651	6.59079	1.49e-06
ENSG00000100505	TRIM9	1.73531	7.45104	6.29e-06
ENSG00000135905	DOCK10	1.73489	6.98911	0.000139128
ENSG00000072163	LIMS2	1.73236	6.59006	1.05e-06
ENSG00000181274	FRAT2	1.73087	6.60307	6.51e-06
ENSG00000141576	RNF157	1.71793	7.31739	8.52e-06
ENSG00000234224	TMEM229A	1.71737	7.96954	1.23e-08
ENSG00000100092	SH3BP1	1.71471	7.06037	3.21e-05
ENSG00000139354	GAS2L3	1.70468	7.31408	0.000292416
ENSG00000164402	2008-09-01	1.70443	7.49709	1.14e-05
ENSG00000133121	STARD13	1.69403	7.46361	3.94e-05
ENSG00000146112	PPP1R18	1.69031	8.74604	1.71e-09
ENSG00000219926	LOC102723968	1.6889	6.5864	2.06e-07
ENSG00000072832	CRMP1	1.68882	8.28921	1.27e-09
ENSG00000117707	PROX1	1.68703	6.69437	0.000124507
ENSG00000143845	ETNK2	1.67866	6.7182	0.000758893
ENSG00000163071	SPATA18	1.67666	6.7102	0.000287551
ENSG00000165959	CLMN	1.67651	6.882	0.000469993
ENSG00000243156	MICAL3	1.67415	7.11935	0.00011762
ENSG00000153976	HS3ST3B1	1.67214	6.79967	0.00101752
ENSG00000160813	PPP1R35	1.6572	6.85591	0.00257026
ENSG00000157734	SNX22	1.65629	6.61372	2.42e-05
ENSG00000173786	CNP	1.64865	8.40846	3.41e-10
ENSG00000154734	ADAMTS1	1.64388	7.08497	0.00282737
ENSG00000134802	SLC43A3	1.63901	6.67288	0.000323188
ENSG00000116649	SRM	1.63879	7.51119	3.31e-05
ENSG00000187164	SHTN1	1.63272	7.01806	0.000749542
ENSG00000163513	TGFBR2	1.63009	7.16933	0.000687222
ENSG00000127418	FGFRL1	1.62482	6.82355	0.0029103
ENSG00000167861	HID1	1.62249	6.66505	0.00122202
ENSG00000169258	GPRIN1	1.62237	6.57771	6.11e-06
ENSG00000106785	TRIM14	1.62173	6.83862	0.00245422
ENSG00000143878	RHOB	1.61496	8.10322	1.49e-06
ENSG00000087495	PHACTR3	1.60898	6.88198	0.000973535
ENSG00000082293	COL19A1	1.60866	6.59554	0.000229149
ENSG00000154217	PITPNC1	1.60853	6.99334	0.00231857
ENSG00000197381	ADARB1	1.60455	7.09531	0.000693149
ENSG00000130429	ARPC1B	1.59039	7.97865	1.07e-07
ENSG00000019582	CD74	1.58994	6.90676	0.00388522
ENSG00000133069	TMCC2	1.58359	6.95567	0.00136784
ENSG00000104368	PLAT	1.57754	8.25037	2.41e-05
ENSG00000167680	SEMA6B	1.57593	6.74101	0.000842494
ENSG00000105971	CAV2	1.57406	6.64544	0.00109375
ENSG00000179915	NRXN1	1.57347	6.77682	0.00024041
ENSG00000118762	PKD2	1.57242	8.39943	1.58e-05
ENSG00000119865	CNRIP1	1.57169	6.84103	0.00183031
ENSG00000187140	FOXD3	1.57072	8.25441	4.18e-06
ENSG00000140564	FURIN	1.56842	6.78639	0.00558597
ENSG00000230798	FOXD3-AS1	1.565	7.68298	2.23e-05
ENSG00000228288	PCAT6	1.56425	6.74108	0.00498088
ENSG00000166106	ADAMTS15	1.55929	6.64551	0.00366331
ENSG00000188517	COL25A1	1.55625	6.71197	0.000850559
ENSG00000121440	PDZRN3	1.55525	7.15237	0.00490948
ENSG00000127564	PKMYT1	1.55247	6.93399	0.00802458
ENSG00000145390	USP53	1.55198	6.90925	0.00242929
ENSG00000134709	HOOK1	1.54166	6.91311	0.0102956
ENSG00000196511	TPK1	1.54139	7.32282	0.000133777
ENSG00000128594	LRRC4	1.5394	7.21393	0.00186556
ENSG00000158859	ADAMTS4	1.53317	6.85609	0.00987664
ENSG00000197147	LRRC8B	1.52911	7.1929	0.00110999
ENSG00000102024	PLS3	1.52796	8.49187	2.65e-08
ENSG00000101096	NFATC2	1.52769	6.64635	0.00226187
ENSG00000105767	CADM4	1.52171	7.1933	0.00104307
ENSG00000064225	ST3GAL6	1.51556	7.21139	0.00147166
ENSG00000275700	AATF	1.51252	7.25309	0.000776595
ENSG00000137936	BCAR3	1.51048	7.61844	0.00146393
ENSG00000205336	ADGRG1	1.50856	6.96685	0.00994878
ENSG00000102290	PCDH11X	1.50843	6.71836	0.0114811
ENSG00000172936	MYD88	1.50277	6.92619	0.0442127
ENSG00000116852	KIF21B	1.49911	7.15855	0.00550846
ENSG00000139679	LPAR6	1.49605	7.42949	0.00906676
ENSG00000204248	COL11A2	1.49575	6.68875	0.00358375
ENSG00000234420	ZNF37BP	1.49489	8.15873	1.95e-05
ENSG00000248587	GDNF-AS1	1.48972	6.58825	0.00114473
ENSG00000144354	CDCA7	1.48752	7.62097	0.00487442
ENSG00000106034	CPED1	1.48609	6.96064	0.00716444
ENSG00000127863	TNFRSF19	1.4839	8.06224	3.64e-05
ENSG00000197905	TEAD4	1.47757	6.63167	0.000833303
ENSG00000092853	CLSPN	1.46929	7.34874	0.0171911
ENSG00000169129	AFAP1L2	1.46803	7.74564	0.000272719
ENSG00000087253	LPCAT2	1.46298	6.94312	0.027153
ENSG00000114547	ROPN1B	1.45934	6.55629	8.78e-06
ENSG00000158715	SLC45A3	1.45919	6.81743	0.00722494
ENSG00000119408	NEK6	1.44737	6.74457	0.00801046
ENSG00000135838	NPL	1.44675	6.79427	0.0164195
ENSG00000156299	TIAM1	1.44521	9.35579	1.93e-10
ENSG00000169432	SCN9A	1.44344	6.60534	0.00424316
ENSG00000145685	LHFPL2	1.44131	6.8787	0.0055981
ENSG00000182667	NTM	1.43918	6.64832	0.00521495
ENSG00000169105	CHST14	1.43804	7.23938	0.0179442
ENSG00000091136	LAMB1	1.4377	9.18509	3.12e-06
ENSG00000145632	PLK2	1.43717	6.98198	0.023664
ENSG00000197653	DNAH10	1.4342	6.9484	0.0208708
ENSG00000171119	NRTN	1.43377	6.63883	0.00538272
ENSG00000124406	ATP8A1	1.43324	6.71463	0.00650664
ENSG00000065328	MCM10	1.4316	7.05721	0.0362408
ENSG00000139289	PHLDA1	1.43006	7.68753	0.0083761
ENSG00000113552	GNPDA1	1.42779	7.23616	0.0113475
ENSG00000276600	RAB7B	1.42742	6.6021	0.00128341
ENSG00000135185	TMEM243	1.42471	6.92199	0.0186219
ENSG00000149480	MTA2	1.42286	7.12834	0.0085648
ENSG00000114021	NIT2	1.42103	7.05561	0.0165093
ENSG00000232956	SNHG15	1.42101	6.70228	0.0194084
ENSG00000124762	CDKN1A	1.41888	8.1936	0.0497853
ENSG00000105281	SLC1A5	1.41731	7.62208	0.00695622
ENSG00000232977	LINC00327	1.41693	6.58506	0.00039407
ENSG00000148737	TCF7L2	1.40922	8.41187	0.000522996
ENSG00000256045	MTRNR2L10	1.40435	6.75486	0.00709436
ENSG00000118785	SPP1	1.40028	6.61536	0.0092129
ENSG00000163558	PRKCI	1.39783	7.87736	0.0056842
ENSG00000099715	PCDH11X	1.39285	6.62638	0.00978445
ENSG00000185565	LSAMP	1.39241	8.36144	0.000890277
ENSG00000215559	ANKRD20A11P	1.39042	6.55878	7.92e-05
ENSG00000059573	ALDH18A1	1.38917	7.68955	0.00114473
ENSG00000164741	DLC1	1.38724	7.45696	0.0182002
ENSG00000198133	TMEM229B	1.38464	6.59806	0.00147166
ENSG00000168268	NT5DC2	1.38365	8.22555	0.000381297
ENSG00000167173	C15orf39	1.38251	6.83831	0.0215968
ENSG00000153993	SEMA3D	1.38167	6.59682	0.00650251
ENSG00000112280	COL9A1	1.38149	7.16928	0.0287047
ENSG00000261279	ULK4P2	1.38105	6.77434	0.0254878
ENSG00000101412	E2F1	1.37519	6.843	0.0285064
ENSG00000116962	NID1	1.36597	8.37055	0.00100907
ENSG00000122042	UBL3	1.36362	8.01067	0.00168099
ENSG00000189067	LITAF	1.36325	8.37333	0.000781833
ENSG00000168005	C11orf84	1.36277	7.8767	0.0076814
ENSG00000141384	TAF4B	1.35858	6.58208	0.00304281
ENSG00000137831	UACA	1.35309	8.14336	0.00452348
ENSG00000186469	GNG2	1.35252	7.67293	0.00550846
ENSG00000138448	ITGAV	1.35248	8.19814	0.00139468
ENSG00000149633	KIAA1755	1.35174	6.72842	0.0229775
ENSG00000102034	ELF4	1.3517	6.61942	0.0287047
ENSG00000064932	SBNO2	1.3501	7.06389	0.0331346
ENSG00000147852	VLDLR	1.35003	7.2769	0.0298683
ENSG00000182263	FIGN	1.34946	8.81684	0.00023788
ENSG00000230910	LOC101928307	1.34811	6.56312	0.00142553
ENSG00000164574	GALNT10	1.34775	7.41218	0.024732
ENSG00000006468	ETV1	1.34344	7.09556	0.0320905
ENSG00000135441	BLOC1S1	1.34295	7.10949	0.0289207
ENSG00000178081	ULK4P3	1.34103	6.78371	0.033415
ENSG00000142611	PRDM16	1.33754	6.6013	0.014569
ENSG00000115306	SPTBN1	1.3356	9.33523	8.42e-06
ENSG00000170775	GPR37	1.33132	6.6467	0.0156664
ENSG00000121766	ZCCHC17	1.32979	7.36958	0.0156664
ENSG00000117266	CDK18	1.32346	6.92645	0.039789
ENSG00000104728	ARHGEF10	1.32082	7.90619	0.00495125
ENSG00000170275	CRTAP	1.32044	9.46913	0.000447892
ENSG00000154678	PDE1C	1.31912	6.58851	0.00968547
ENSG00000113916	BCL6	1.31403	7.11246	0.047308
ENSG00000130005	GAMT	1.31324	6.72424	0.0252973
ENSG00000248441	LOC105370994	1.30926	6.56834	0.00288553
ENSG00000273888	FRMD6-AS1	1.30656	6.59892	0.0105606
ENSG00000136104	RNASEH2B	1.30579	6.87572	0.0421365
ENSG00000132613	MTSS1L	1.2999	7.40717	0.0312579
ENSG00000103152	MPG	1.29171	7.16978	0.034903
ENSG00000175567	UCP2	1.29109	7.65827	0.0421365
ENSG00000063244	U2AF2	1.28702	7.70952	0.0328003
ENSG00000164099	PRSS12	1.28246	6.58154	0.00489373
ENSG00000171766	GATM	1.27695	6.66422	0.0257132
ENSG00000221866	PLXNA4	1.27669	6.61365	0.0224171
ENSG00000142208	AKT1	1.27031	8.11484	0.0268408
ENSG00000135446	CDK4	1.26912	8.59657	0.00601408
ENSG00000144366	GULP1	1.269	7.69842	0.0405861
ENSG00000130762	ARHGEF16	1.25906	6.58521	0.0140073
ENSG00000180509	KCNE1B	1.23944	6.58616	0.0132202
ENSG00000151468	CCDC3	1.23865	6.68689	0.0441319
ENSG00000133863	TEX15	1.23437	6.60436	0.0251738
ENSG00000177359	OVOS2	1.21736	6.6837	0.0366569
ENSG00000223839	FAM95B1	1.21357	6.56787	0.00743811
ENSG00000197977	ELOVL2	1.19399	6.57206	0.0196505
ENSG00000166091	CMTM5	1.16416	6.55391	0.0043393
ENSG00000154654	NCAM2	1.08066	6.56204	0.0399778
ENSG00000277478	MIR6165	1.07769	6.52822	0.00234396
ENSG00000148908	RGS10	1.05382	6.56886	0.0429396
ENSG00000173678	SPDYE2B	-1.08409	6.53471	0.0150557
ENSG00000237248	LINC00987	-1.08875	6.56795	0.0313084
ENSG00000129951	PLPPR3	-1.10333	6.55488	0.0250536
ENSG00000136014	USP44	-1.11985	6.6	0.0438138
ENSG00000163898	LIPH	-1.13399	6.57252	0.0473572
ENSG00000129422	MTUS1	-1.17129	6.56916	0.033497
ENSG00000219451	RPL23P8	-1.19168	6.80923	0.0396467
ENSG00000240972	MIF	-1.21125	6.69443	0.0311912
ENSG00000020577	SAMD4A	-1.21881	6.56266	0.0235602
ENSG00000116729	WLS	-1.22027	8.36616	0.0185243
ENSG00000088882	CPXM1	-1.22202	7.59205	0.0310088
ENSG00000261879	LOC100130950	-1.2293	6.56278	0.00619521
ENSG00000135070	ISCA1	-1.24193	6.68151	0.0390453
ENSG00000154127	UBASH3B	-1.2424	6.62751	0.0396467
ENSG00000253203	GUSBP3	-1.24391	6.74734	0.0161996
ENSG00000075420	FNDC3B	-1.24884	7.60881	0.0488278
ENSG00000117298	ECE1	-1.25182	7.2369	0.0433503
ENSG00000107099	DOCK8	-1.26122	6.55314	0.00695622
ENSG00000214491	SEC14L6	-1.26294	6.59083	0.030777
ENSG00000102271	KLHL4	-1.26524	6.65654	0.0450329
ENSG00000196628	TCF4	-1.26744	8.00566	0.0107686
ENSG00000108679	LGALS3BP	-1.26804	6.5755	0.0107698
ENSG00000176845	METRNL	-1.2884	6.7052	0.0424869
ENSG00000133943	C14orf159	-1.29084	6.81151	0.0467269
ENSG00000272221	LOC101929072	-1.29414	6.55224	0.00431108
ENSG00000105738	SIPA1L3	-1.29441	6.90189	0.0258199
ENSG00000144218	AFF3	-1.29497	6.74597	0.03925
ENSG00000100625	SIX4	-1.29605	6.61911	0.0167687
ENSG00000182871	COL18A1	-1.29763	7.54579	0.0106881
ENSG00000253554	LOC102724623	-1.29984	6.57235	0.00165975
ENSG00000256087	ZNF432	-1.30195	6.69236	0.0244644
ENSG00000180263	FGD6	-1.30277	7.11683	0.0488278
ENSG00000115758	ODC1	-1.30987	7.61789	0.0249069
ENSG00000185339	TCN2	-1.31106	6.67954	0.0427116
ENSG00000117450	PRDX1	-1.31672	7.6672	0.00226386
ENSG00000142089	IFITM3	-1.32034	8.0731	0.0121204
ENSG00000254087	LYN	-1.32115	6.76949	0.0224984
ENSG00000162998	FRZB	-1.32626	6.88338	0.0367909
ENSG00000112473	SLC39A7	-1.33019	6.791	0.00706379
ENSG00000186976	EFCAB6	-1.3331	6.54433	0.000372795
ENSG00000198353	HOXC4	-1.33464	6.87052	0.0231171
ENSG00000181744	C3orf58	-1.34521	6.78784	0.0177935
ENSG00000104998	IL27RA	-1.3458	6.917	0.0363126
ENSG00000037965	HOXC8	-1.35092	7.31393	0.0177935
ENSG00000162614	NEXN	-1.35243	6.60307	0.0102097
ENSG00000120594	PLXDC2	-1.35808	6.55167	0.000690933
ENSG00000135253	KCP	-1.36093	6.62222	0.0133942
ENSG00000248905	FMN1	-1.36228	6.56577	0.00117889
ENSG00000108379	LOC101929777	-1.36415	6.73579	0.0421365
ENSG00000102081	FMR1	-1.36419	7.61002	0.00282737
ENSG00000127948	MIR4651	-1.36506	7.24597	0.00226527
ENSG00000138639	ARHGAP24	-1.36521	6.57261	0.00382881
ENSG00000159842	ABR	-1.36639	7.38042	0.00213163
ENSG00000120798	NR2C1	-1.36797	7.25112	0.0043457
ENSG00000143603	KCNN3	-1.36862	6.59837	0.00444504
ENSG00000250510	GPR162	-1.37136	6.74802	0.00365434
ENSG00000092964	DPYSL2	-1.37225	7.60665	0.00373839
ENSG00000169857	AVEN	-1.37404	6.63977	0.00364406
ENSG00000255559	ZNF252P-AS1	-1.37499	6.58272	0.00209538
ENSG00000109339	MAPK10	-1.3818	6.84388	0.0131135
ENSG00000088340	FER1L4	-1.38551	6.89508	0.0243856
ENSG00000172037	LAMB2	-1.38984	7.2566	0.00271368
ENSG00000177694	NAALADL2	-1.39539	6.68224	0.00230671
ENSG00000215788	TNFRSF25	-1.39655	6.66299	0.00290905
ENSG00000218336	TENM3	-1.40348	7.43311	0.00186348
ENSG00000105855	ITGB8	-1.40641	6.70371	0.0112426
ENSG00000066032	CTNNA2	-1.40993	6.56003	0.000748971
ENSG00000085276	MECOM	-1.41357	6.5856	0.00707963
ENSG00000243927	MRPS6	-1.41454	7.26831	0.00114473
ENSG00000162878	PKDCC	-1.41518	7.83	0.00229605
ENSG00000166272	WBP1L	-1.41986	7.3273	0.0011638
ENSG00000145423	SFRP2	-1.43281	6.89859	0.0243278
ENSG00000063180	CA11	-1.43325	6.89794	0.0170343
ENSG00000109819	PPARGC1A	-1.43421	6.62708	0.000897879
ENSG00000092421	SEMA6A	-1.43445	7.16222	0.0200578
ENSG00000162669	HFM1	-1.43712	7.04294	0.00363182
ENSG00000139880	CDH24	-1.44374	6.72064	0.00166932
ENSG00000109472	CPE	-1.445	7.13353	0.000873358
ENSG00000169071	ROR2	-1.45288	6.82365	0.0051918
ENSG00000133401	PDZD2	-1.46877	6.60924	0.000359564
ENSG00000106665	CLIP2	-1.47279	6.78756	0.000277215
ENSG00000137266	SLC22A23	-1.47557	6.81344	0.0055981
ENSG00000245694	LOC101927480	-1.47642	7.04533	0.00666967
ENSG00000162783	IER5	-1.47752	7.20343	0.00413151
ENSG00000188483	IER5L	-1.47769	7.13524	0.000897879
ENSG00000106004	HOXA5	-1.47816	7.75916	0.00122202
ENSG00000133169	BEX1	-1.47906	6.65104	0.00626513
ENSG00000186998	EMID1	-1.48008	6.60069	0.00176695
ENSG00000173163	COMMD1	-1.48178	7.4744	2.03e-07
ENSG00000196218	RYR1	-1.48441	6.68867	0.000776595
ENSG00000272168	CASC15	-1.49063	6.67708	0.000520129
ENSG00000176170	SPHK1	-1.49103	6.73848	0.000833303
ENSG00000123146	ADGRE5	-1.49116	6.69045	0.00168295
ENSG00000196482	ESRRG	-1.49474	6.69912	0.00115721
ENSG00000055118	KCNH2	-1.49566	6.71328	0.0045786
ENSG00000254369	HOXA-AS3	-1.49609	6.63322	0.0027712
ENSG00000204347	BTBD17	-1.49646	6.55817	8.7e-05
ENSG00000127578	WFIKKN1	-1.49736	6.66514	0.000890277
ENSG00000134769	DTNA	-1.49758	6.90906	0.00323326
ENSG00000071205	ARHGAP10	-1.49947	6.61917	0.00110555
ENSG00000077782	FGFR1	-1.49963	7.95221	7.73e-05
ENSG00000196502	SULT1A1	-1.5017	6.77308	0.000863266
ENSG00000100968	NFATC4	-1.50278	7.13842	0.000385823
ENSG00000172986	GXYLT2	-1.50475	6.63339	0.00186164
ENSG00000157927	RADIL	-1.50608	6.70867	0.000871077
ENSG00000170017	ALCAM	-1.51774	7.25608	0.002706
ENSG00000129116	PALLD	-1.51787	7.67563	3.02e-05
ENSG00000158966	CACHD1	-1.51998	7.13905	0.000102176
ENSG00000157502	MUM1L1	-1.52248	6.62632	0.000750926
ENSG00000151617	EDNRA	-1.52388	6.75853	0.00695622
ENSG00000120327	PCDHB14	-1.52489	6.60692	0.00388522
ENSG00000014914	MTMR11	-1.52833	6.70542	0.00987664
ENSG00000280870	MIR325HG	-1.53611	6.68406	0.00059006
ENSG00000184949	FAM227A	-1.54122	6.83681	0.00416374
ENSG00000137474	MYO7A	-1.54154	6.60381	0.00142553
ENSG00000144847	IGSF11	-1.54435	6.92339	0.00354514
ENSG00000205476	CCDC85C	-1.54494	6.83733	0.00265742
ENSG00000182168	UNC5C	-1.54603	7.05235	0.000590265
ENSG00000117069	ST6GALNAC5	-1.54605	6.62592	0.00230671
ENSG00000164733	CTSB	-1.54747	8.16382	2.59e-06
ENSG00000181444	ZNF467	-1.5491	6.77971	0.00147166
ENSG00000138080	EMILIN1	-1.55082	7.02374	0.00170197
ENSG00000083444	PLOD1	-1.55747	7.22764	0.000108619
ENSG00000077044	DGKD	-1.56102	7.75639	6.99e-06
ENSG00000138604	GLCE	-1.5624	7.10916	0.000737116
ENSG00000145687	SSBP2	-1.56311	8.25873	4.18e-08
ENSG00000035403	VCL	-1.56598	8.32377	8.24e-08
ENSG00000115556	PLCD4	-1.5726	6.72375	0.000809788
ENSG00000146072	TNFRSF21	-1.57439	6.74633	0.000792365
ENSG00000118523	CTGF	-1.57542	6.6026	0.00130588
ENSG00000198743	SLC5A3	-1.58451	7.94257	4.09e-07
ENSG00000111328	CDK2AP1	-1.58743	6.60224	1.22e-05
ENSG00000010818	HIVEP2	-1.58757	6.72838	0.000620444
ENSG00000122644	ARL4A	-1.5878	6.79773	0.000270034
ENSG00000011028	MRC2	-1.59796	7.12661	6.82e-06
ENSG00000088756	ARHGAP28	-1.60635	6.97153	3.69e-05
ENSG00000166147	FBN1	-1.61216	7.05833	0.000699037
ENSG00000100078	PLA2G3	-1.62698	6.79729	2.85e-05
ENSG00000169604	ANTXR1	-1.63006	7.23009	7.42e-06
ENSG00000168772	CXXC4	-1.63017	7.14066	0.000104514
ENSG00000126733	DACH2	-1.6344	6.69488	0.000326407
ENSG00000169136	MIR4751	-1.63934	6.9729	0.000826126
ENSG00000005073	HOXA11	-1.64131	6.68128	0.000754015
ENSG00000141449	GREB1L	-1.64651	7.42511	4.49e-05
ENSG00000154856	APCDD1	-1.652	8.21839	1.09e-06
ENSG00000146700	SSC4D	-1.66009	6.68505	2.29e-05
ENSG00000004059	ARF5	-1.66263	6.55553	7.41e-09
ENSG00000075275	CELSR1	-1.66632	6.73721	3.17e-05
ENSG00000204335	SP5	-1.66928	7.30466	0.000123451
ENSG00000182492	BGN	-1.67081	7.51824	1.8e-05
ENSG00000159307	SCUBE1	-1.68212	6.57645	6.91e-06
ENSG00000059804	SLC2A3	-1.69338	7.31107	4.29e-07
ENSG00000149591	TAGLN	-1.69949	6.7245	0.00166932
ENSG00000088538	DOCK3	-1.71132	6.66267	9.37e-06
ENSG00000092068	SLC7A8	-1.71429	6.57519	1.79e-06
ENSG00000183779	ZNF703	-1.7253	8.06212	7.59e-10
ENSG00000103740	ACSBG1	-1.74001	6.92009	1.78e-05
ENSG00000143162	CREG1	-1.74332	8.06511	2.03e-08
ENSG00000187867	PALM3	-1.74605	6.63671	5.68e-06
ENSG00000089472	HEPH	-1.74856	6.83002	0.000108619
ENSG00000139329	LUM	-1.74876	6.84373	0.00214791
ENSG00000154529	LOC100289279	-1.75319	7.41197	9.7e-08
ENSG00000171206	TRIM8	-1.75334	8.06305	7.78e-11
ENSG00000129474	AJUBA	-1.75426	6.76636	5.78e-05
ENSG00000125355	TMEM255A	-1.76199	6.59285	2.02e-05
ENSG00000173262	SLC2A14	-1.77593	6.77379	8.38e-08
ENSG00000137642	SORL1	-1.77796	6.59525	3.49e-05
ENSG00000070808	CAMK2A	-1.778	6.59112	1.92e-06
ENSG00000278233	LOC100008587	-1.77926	7.27565	1.74e-08
ENSG00000189056	RELN	-1.78386	6.64434	6.8e-05
ENSG00000124942	AHNAK	-1.78863	7.08783	0.000183734
ENSG00000170412	GPRC5C	-1.79039	6.61962	1.2e-06
ENSG00000102935	ZNF423	-1.79473	7.38783	5.62e-09
ENSG00000129009	ISLR	-1.7967	6.59979	5.91e-06
ENSG00000198795	ZNF521	-1.79828	7.58429	1.76e-10
ENSG00000179604	CDC42EP4	-1.80318	6.79777	2.98e-05
ENSG00000151012	SLC7A11	-1.8052	7.33353	3.5e-06
ENSG00000125398	SOX9	-1.81146	7.67862	4.97e-06
ENSG00000102053	ZC3H12B	-1.81575	6.71654	4e-05
ENSG00000169946	ZFPM2	-1.81684	6.66827	2.82e-07
ENSG00000010610	CD4	-1.84741	6.65224	7.42e-06
ENSG00000163132	MSX1	-1.85086	6.75459	0.000158897
ENSG00000083857	FAT1	-1.85487	7.32431	1.67e-09
ENSG00000168575	SLC20A2	-1.86725	7.19083	5.83e-09
ENSG00000112139	MDGA1	-1.87565	6.92373	9.96e-06
ENSG00000266524	GDF10	-1.88548	6.79674	8.67e-06
ENSG00000137331	IER3	-1.88655	6.75138	2.61e-06
ENSG00000113721	PDGFRB	-1.88707	6.63308	4.52e-07
ENSG00000157423	HYDIN	-1.89175	6.60666	1.64e-08
ENSG00000148798	INA	-1.89403	6.61964	6.57e-06
ENSG00000131711	MAP1B	-1.90068	9.47138	1.38e-21
ENSG00000122861	PLAU	-1.90849	7.04013	8.29e-06
ENSG00000137968	SLC44A5	-1.91691	6.77748	3.81e-06
ENSG00000165238	WNK2	-1.92771	6.61049	1.33e-07
ENSG00000167371	PRRT2	-1.93027	6.84959	1.68e-08
ENSG00000104833	TUBB4A	-1.93717	6.72983	7.58e-10
ENSG00000139364	TMEM132B	-1.93724	6.60847	1.5e-06
ENSG00000019549	SNAI2	-1.93888	7.1144	8.67e-06
ENSG00000079739	PGM1	-1.9391	7.36853	5.28e-14
ENSG00000204580	MIR4640	-1.94865	7.16442	3.41e-10
ENSG00000102934	PLLP	-1.94947	6.6314	1.63e-06
ENSG00000128564	VGF	-1.95144	6.88721	2.92e-05
ENSG00000143248	RGS5	-1.95297	6.6127	5.24e-07
ENSG00000198121	LPAR1	-1.95545	7.09802	2.26e-07
ENSG00000241956	LOC102546299	-1.96243	6.75182	1.82e-07
ENSG00000187134	AKR1C1	-1.96351	6.85302	2.02e-07
ENSG00000162551	ALPL	-1.97264	6.5742	8.56e-11
ENSG00000078114	NEBL	-1.98502	6.68394	1.21e-07
ENSG00000117394	SLC2A1	-1.98996	6.80496	9.47e-07
ENSG00000018625	ATP1A2	-1.99904	9.12088	1.43e-25
ENSG00000183833	MAATS1	-2.00769	6.59154	1.06e-08
ENSG00000137267	TUBB2A	-2.01812	8.42486	7.92e-27
ENSG00000106714	CNTNAP3	-2.01847	7.15398	3.01e-10
ENSG00000172159	FRMD3	-2.02464	6.72317	1.55e-08
ENSG00000164199	ADGRV1	-2.03092	7.35673	1.08e-12
ENSG00000050438	SLC4A8	-2.0382	6.92793	3.93e-09
ENSG00000162576	MXRA8	-2.03936	6.67095	1.86e-07
ENSG00000077264	PAK3	-2.04079	6.68016	2.33e-08
ENSG00000181019	NQO1	-2.04775	6.95643	1.49e-09
ENSG00000157613	CREB3L1	-2.09847	6.63437	4.28e-09
ENSG00000180287	PLD5	-2.10082	6.72999	1.7e-07
ENSG00000120675	DNAJC15	-2.11277	6.60624	1.05e-11
ENSG00000140416	TPM1	-2.11443	7.34716	3.18e-11
ENSG00000125378	BMP4	-2.12445	6.56877	2.28e-12
ENSG00000091129	NRCAM	-2.12968	7.11028	5.75e-11
ENSG00000074047	GLI2	-2.13633	6.62434	8.09e-11
ENSG00000111962	UST	-2.15589	7.01825	1.35e-11
ENSG00000050555	LAMC3	-2.16815	6.60876	2.96e-10
ENSG00000144724	PTPRG	-2.1885	7.29619	2.24e-18
ENSG00000113504	SLC12A7	-2.18869	6.7564	1.25e-09
ENSG00000162981	FAM84A	-2.19173	6.61366	6.15e-11
ENSG00000036530	CYP46A1	-2.19607	6.61724	2.93e-09
ENSG00000175879	HOXD8	-2.20108	6.84367	1.63e-11
ENSG00000198771	RCSD1	-2.20292	6.64865	2.17e-11
ENSG00000233780	LINC00367	-2.23077	6.91035	1.66e-19
ENSG00000112902	SEMA5A	-2.23175	6.92564	1.08e-10
ENSG00000157168	NRG1	-2.23256	6.6275	1.48e-11
ENSG00000145934	TENM2	-2.23697	6.6655	8.04e-12
ENSG00000196876	SCN8A	-2.23858	7.28376	3.73e-16
ENSG00000104967	NOVA2	-2.24892	6.61767	2.81e-12
ENSG00000174607	UGT8	-2.25524	7.76691	2.3e-23
ENSG00000151632	AKR1C2	-2.26367	6.8298	2.59e-11
ENSG00000175928	LRRN1	-2.27408	6.73499	4.56e-11
ENSG00000129757	CDKN1C	-2.29103	7.83753	2.05e-18
ENSG00000169439	SDC2	-2.30121	7.43197	6.56e-18
ENSG00000152377	SPOCK1	-2.3028	6.64401	5.12e-13
ENSG00000101144	BMP7	-2.35079	7.72457	3.56e-16
ENSG00000112175	BMP5	-2.35994	6.92821	2.88e-15
ENSG00000197565	COL4A6	-2.36099	6.89785	6.91e-13
ENSG00000153707	PTPRD	-2.38016	7.39615	8.01e-25
ENSG00000146648	EGFR	-2.4077	6.59729	4.96e-18
ENSG00000138119	MYOF	-2.40877	6.73748	1.98e-14
ENSG00000140287	HDC	-2.41503	6.61541	1.43e-15
ENSG00000154928	EPHB1	-2.41571	6.78365	1.14e-13
ENSG00000162522	KIAA1522	-2.41854	7.00994	7.38e-19
ENSG00000066382	MPPED2	-2.43358	6.74331	4.9e-15
ENSG00000181234	TMEM132C	-2.43947	7.2353	1.59e-22
ENSG00000041515	MYO16	-2.44736	6.58603	8.23e-20
ENSG00000135046	ANXA1	-2.45567	6.68017	1.94e-13
ENSG00000128045	RASL11B	-2.47375	7.01983	2.02e-12
ENSG00000143333	RGS16	-2.47978	6.76436	4.01e-08
ENSG00000240694	PNMA2	-2.48523	6.68378	2.18e-14
ENSG00000185070	FLRT2	-2.52142	6.75391	9.1e-16
ENSG00000165323	FAT3	-2.52349	6.677	1.77e-14
ENSG00000149256	TENM4	-2.58829	6.71582	8.12e-20
ENSG00000012171	MIR6872	-2.59004	6.66065	5.37e-18
ENSG00000143850	PLEKHA6	-2.59969	6.59802	2.15e-22
ENSG00000120885	MIR6843	-2.60161	6.7893	5.49e-21
ENSG00000103449	SALL1	-2.61029	6.7894	5.66e-17
ENSG00000166250	CLMP	-2.64255	7.02586	4.29e-24
ENSG00000233101	HOXB-AS3	-2.64257	6.71548	9.01e-18
ENSG00000106484	MEST	-2.64437	7.86894	1.23e-44
ENSG00000115738	ID2	-2.65989	6.89739	6.66e-13
ENSG00000140807	NKD1	-2.66228	8.07483	1.68e-35
ENSG00000171451	DSEL	-2.66807	6.7414	2.38e-22
ENSG00000144857	BOC	-2.67352	6.79174	9.89e-19
ENSG00000176842	IRX5	-2.67774	6.61526	2.83e-19
ENSG00000154639	CXADR	-2.68008	7.32846	5.84e-25
ENSG00000225783	MIAT	-2.68248	6.63449	1.17e-18
ENSG00000165029	ABCA1	-2.68439	6.79481	2.55e-13
ENSG00000172575	RASGRP1	-2.71908	6.70497	7.48e-21
ENSG00000213694	S1PR3	-2.75597	6.83529	1.16e-18
ENSG00000064309	CDON	-2.76877	7.34835	2.22e-29
ENSG00000141639	MAPK4	-2.77436	7.11019	2.08e-23
ENSG00000112319	EYA4	-2.78219	6.90464	2.5e-18
ENSG00000106333	PCOLCE	-2.78616	7.24865	2.36e-20
ENSG00000100767	PAPLN	-2.78974	6.68631	3.9e-20
ENSG00000143195	ILDR2	-2.79381	6.78037	3.9e-20
ENSG00000137473	TTC29	-2.82275	6.63186	1.16e-25
ENSG00000117318	ID3	-2.85382	6.96478	3.29e-24
ENSG00000114251	WNT5A	-2.86535	6.80022	5.78e-22
ENSG00000170166	HOXD4	-2.86576	6.70158	2.56e-27
ENSG00000169851	PCDH7	-2.88983	7.73607	2.63e-35
ENSG00000175183	CSRP2	-2.90828	6.75995	1.01e-27
ENSG00000198797	BRINP2	-2.92104	6.63033	5.48e-26
ENSG00000182968	SOX1	-2.92572	6.65895	8.32e-26
ENSG00000182256	GABRG3	-2.93965	6.7398	3.99e-22
ENSG00000092607	TBX15	-3.00013	6.64719	1.99e-22
ENSG00000096696	DSP	-3.01612	7.58026	9.4e-39
ENSG00000156925	ZIC3	-3.03291	6.95042	7.12e-32
ENSG00000128645	MIR7704	-3.04027	6.65575	5.95e-29
ENSG00000182175	RGMA	-3.04124	7.22206	2.27e-40
ENSG00000185112	FAM43A	-3.04769	6.70214	1.99e-30
ENSG00000179820	MYADM	-3.05324	6.77593	1.97e-30
ENSG00000128652	HOXD3	-3.064	6.73658	3.02e-34
ENSG00000145147	SLIT2	-3.07102	7.18799	3.49e-29
ENSG00000066468	FGFR2	-3.08403	6.96315	3.61e-35
ENSG00000184613	NELL2	-3.11025	6.90333	4.24e-34
ENSG00000277586	NEFL	-3.11603	7.20158	1.85e-32
ENSG00000184160	ADRA2C	-3.12519	7.23712	2.43e-25
ENSG00000152092	ASTN1	-3.15334	6.88381	2.1e-32
ENSG00000276644	DACH1	-3.15571	7.1641	5.61e-28
ENSG00000148204	CRB2	-3.16017	6.8362	2.3e-30
ENSG00000128849	CGNL1	-3.16254	6.81029	3.77e-31
ENSG00000115461	IGFBP5	-3.16884	8.53944	6.7e-33
ENSG00000256463	SALL3	-3.19752	6.68942	5.45e-31
ENSG00000075213	SEMA3A	-3.22284	7.17496	1.09e-40
ENSG00000183287	CCBE1	-3.24612	6.83193	1.1e-28
ENSG00000139174	PRICKLE1	-3.30132	6.84385	3.22e-35
ENSG00000164161	HHIP	-3.35978	7.21197	5.83e-42
ENSG00000196569	LAMA2	-3.36473	6.94814	6.36e-27
ENSG00000078053	AMPH	-3.39836	6.98449	1.01e-46
ENSG00000224189	HAGLR	-3.39875	6.69683	2.38e-48
ENSG00000147257	GPC3	-3.41289	7.50458	3.19e-58
ENSG00000177508	IRX3	-3.42453	6.88664	2.24e-31
ENSG00000118733	OLFM3	-3.44415	6.7449	7.66e-37
ENSG00000176771	NCKAP5	-3.45591	6.90326	4.29e-35
ENSG00000137571	SLCO5A1	-3.49571	10.5553	9.73e-94
ENSG00000275215	LOC100008587	-3.51629	8.13902	1.42e-103
ENSG00000163520	FBLN2	-3.56815	7.10768	2.12e-57
ENSG00000188042	ARL4C	-3.59133	7.29789	1.26e-64
ENSG00000184486	POU3F2	-3.59444	6.95562	2.49e-40
ENSG00000116106	EPHA4	-3.61561	6.79231	4.57e-41
ENSG00000189120	SP6	-3.66397	6.80232	3.25e-39
ENSG00000114279	FGF12	-3.66961	6.82229	2.38e-33
ENSG00000168542	MIR3606	-3.6761	7.22312	3.86e-34
ENSG00000137573	SULF1	-3.69487	7.80579	4.04e-75
ENSG00000164692	COL1A2	-3.8203	8.31785	5.81e-40
ENSG00000128709	HOXD9	-3.85111	7.06828	2.13e-66
ENSG00000079215	SLC1A3	-3.89099	7.61704	8.22e-82
ENSG00000174963	ZIC4	-3.91363	6.83043	1.65e-62
ENSG00000171956	FOXB1	-3.91886	6.8496	3.15e-49
ENSG00000130707	ASS1	-3.95486	7.13281	2.72e-67
ENSG00000163359	COL6A3	-4.06182	7.0833	2.15e-67
ENSG00000128713	HOXD11	-4.07024	7.1628	1.32e-75
ENSG00000116039	ATP6V1B1	-4.13865	7.00245	4.7e-56
ENSG00000173208	ABCD2	-4.15081	6.8705	4.01e-53
ENSG00000226258	GRM7-AS3	-4.21325	7.01505	2.59e-39
ENSG00000139800	ZIC5	-4.69215	7.07706	1.4e-112
ENSG00000104722	NEFM	-4.81906	7.5597	2.71e-92
ENSG00000159167	STC1	-4.94673	7.12036	2.07e-98
ENSG00000138061	CYP1B1	-5.19061	8.26199	1.12e-78
ENSG00000128710	HOXD10	-5.21841	8.16611	3.36e-234
ENSG00000140937	CDH11	-5.54766	7.61115	1.24e-190
ENSG00000043355	ZIC2	-5.64748	8.0321	8.34e-273
ENSG00000152977	ZIC1	-5.81933	7.61875	5.14e-216

## Sheet: Janksy 2021
Selina Jansky, 2021
Supplementary Table 5. Calculated marker genes for adrenal medullary cell populations. Table with marker genes for cell populations of the developing adrenal medulla as determined by differential expression with two-sided Wilcoxon rank sum test (adjusted p-value < 0.05, log fold change > 0.5) including descriptive statistics.
cluster	gene	average logFC	adjusted P-value	percent expressed
late SCPs	OLFML2A	1.90822	0	0.701
late SCPs	NRXN3	1.90602	0	0.907
late SCPs	SLC35F1	1.86489	0	0.907
late SCPs	CDH19	1.57229	0	0.761
late SCPs	ABCA8	1.56307	0	0.598
late SCPs	PRDM16	0.914328	0	0.324
late SCPs	MPZ	1.20402	2.6551e-299	0.467
late SCPs	ARHGAP15	1.3594	7.76126e-284	0.456
late SCPs	CHST9	1.27194	2.21277e-283	0.475
late SCPs	LRRTM4	1.84956	6.84417e-282	0.826
late SCPs	SHISA9	1.34243	3.01656e-279	0.375
late SCPs	COL5A2	1.38565	3.33569e-275	0.791
late SCPs	XKR4	1.96448	1.26089e-269	0.771
late SCPs	TRPM3	1.67328	2.82758e-268	0.818
late SCPs	SAMHD1	1.12217	1.21852e-267	0.443
late SCPs	RP11-308N19.1	1.75453	1.79192e-266	0.459
late SCPs	INSC	1.19129	9.7844e-264	0.547
late SCPs	RP11-242P2.1	1.15593	7.67564e-263	0.483
late SCPs	NRXN1	1.96083	2.77722e-256	0.934
late SCPs	IL1RAPL1	1.3562	3.52951e-251	0.816
late SCPs	PTPRZ1	1.13166	2.34112e-245	0.739
late SCPs	NR2F2-AS1	1.48748	1.98747e-238	0.737
late SCPs	LAMA2	1.52226	3.5671e-235	0.589
late SCPs	LPL	0.943515	1.21841e-234	0.277
late SCPs	PLP1	1.1588	5.5798e-226	0.408
late SCPs	SCN7A	1.15682	3.5081e-225	0.478
late SCPs	TGFBR2	1.23794	2.17959e-222	0.663
late SCPs	GINS3	0.94259	3.06045e-215	0.332
late SCPs	DST	1.20692	6.563e-214	0.954
late SCPs	PRIMA1	1.12165	6.30704e-211	0.451
late SCPs	GPR126	1.04516	5.01352e-206	0.557
late SCPs	PLCE1	1.1652	8.10279e-202	0.505
late SCPs	TMEM132B	1.04991	2.23119e-198	0.399
late SCPs	PARD3B	1.48773	2.89888e-198	0.791
late SCPs	PLAT	1.27779	1.97474e-197	0.503
late SCPs	SHC4	0.897938	9.43346e-197	0.369
late SCPs	CHL1	1.14264	5.34953e-196	0.483
late SCPs	ERBB3	0.93081	7.17571e-195	0.413
late SCPs	POLR2F	1.29927	7.94183e-195	0.566
late SCPs	FHDC1	1.01305	1.21988e-191	0.434
late SCPs	NKAIN2	1.47467	2.7346e-191	0.536
late SCPs	ZEB2	1.19323	5.54031e-191	0.881
late SCPs	GRIN2B	0.849465	9.10095e-187	0.286
late SCPs	STARD13	1.2016	6.41319e-184	0.835
late SCPs	SEMA3C	1.24451	7.6087e-184	0.506
late SCPs	IL1RAPL2	1.16257	2.39366e-183	0.538
late SCPs	QKI	1.23029	9.9227e-183	0.842
late SCPs	ADAM23	1.3379	2.97653e-181	0.72
late SCPs	S100B	1.10357	5.89521e-181	0.337
late SCPs	EDNRB	1.1101	2.91799e-178	0.487
late SCPs	SNTB1	1.09412	8.29521e-177	0.628
late SCPs	NAALADL2	1.34215	9.97981e-176	0.767
late SCPs	VGLL3	0.809987	2.50307e-173	0.271
late SCPs	AFAP1L2	0.831496	3.08125e-173	0.328
late SCPs	NKAIN3	1.08421	3.48208e-172	0.832
late SCPs	RGCC	0.902198	2.24558e-169	0.307
late SCPs	PKNOX2	1.06502	1.96361e-166	0.479
late SCPs	GPM6B	1.16722	6.57853e-166	0.603
late SCPs	ARHGAP42	1.15091	2.03728e-163	0.574
late SCPs	PPP2R2B	1.58489	3.21244e-160	0.532
late SCPs	TTYH1	0.820898	3.02895e-158	0.297
late SCPs	SH3D19	1.22353	3.72486e-154	0.633
late SCPs	SYNPR	1.2717	5.08254e-150	0.369
late SCPs	ARHGAP31	0.842312	6.07669e-150	0.345
late SCPs	WWTR1	1.10954	1.29026e-148	0.653
late SCPs	PPFIBP1	0.970326	1.68789e-148	0.715
late SCPs	COL25A1	1.19883	4.18531e-146	0.578
late SCPs	AHR	0.982132	1.34127e-145	0.375
late SCPs	PTPRJ	1.13046	2.58109e-143	0.75
late SCPs	SOX5	1.10365	7.05418e-142	0.813
late SCPs	AQP4-AS1	1.02706	4.23643e-140	0.397
late SCPs	KCNH8	1.15852	6.50516e-140	0.684
late SCPs	COL4A2	1.03853	9.45604e-139	0.601
late SCPs	RP11-776H12.1	0.951718	1.8778e-138	0.486
late SCPs	RASSF4	0.618138	1.16621e-135	0.269
late SCPs	SOX10	0.829306	3.28101e-134	0.351
late SCPs	LAMA4	1.14309	8.0436e-134	0.638
late SCPs	KIAA1217	1.12562	1.29451e-133	0.619
late SCPs	RFTN2	0.922368	3.04148e-133	0.449
late SCPs	EPHA5	0.928167	1.34877e-131	0.339
late SCPs	LINC00478	1.09626	2.88028e-131	0.744
late SCPs	GAS7	1.05278	4.83289e-131	0.706
late SCPs	ALDH1A1	0.964535	7.00607e-130	0.353
late SCPs	CDH6	0.734369	1.33101e-129	0.617
late SCPs	MEGF10	0.755969	3.46298e-127	0.47
late SCPs	C10orf11	1.0982	4.37384e-121	0.571
late SCPs	FIGN	1.06807	4.86394e-120	0.709
late SCPs	ERBB4	0.868701	1.66663e-119	0.628
late SCPs	PPAP2A	1.21235	1.19253e-115	0.636
late SCPs	FRMD6	0.917485	5.31198e-114	0.437
late SCPs	COL4A1	0.975466	2.1356e-113	0.467
late SCPs	MEF2C	0.86267	6.59968e-110	0.777
late SCPs	CELF2	0.892545	1.63983e-108	0.627
late SCPs	COL5A1	0.759646	1.67817e-108	0.31
late SCPs	CTD-3088G3.8	0.934818	1.65913e-105	0.304
late SCPs	GLI3	0.920284	1.81736e-105	0.505
late SCPs	MAPRE2	1.08402	2.98663e-105	0.699
late SCPs	ARHGEF26	0.767734	1.0399e-104	0.399
late SCPs	WIPF1	0.832316	1.28269e-104	0.418
late SCPs	PLA2G4A	0.749781	1.21228e-103	0.286
late SCPs	CDK18	0.718359	1.71667e-103	0.282
late SCPs	RP11-436K8.1	0.792777	1.88287e-103	0.472
late SCPs	CSMD1	1.49433	4.19371e-103	0.475
late SCPs	KCNMB4	0.838837	2.48017e-101	0.351
late SCPs	ANXA2	0.94568	9.12114e-100	0.525
late SCPs	PMP22	0.907548	2.19209e-99	0.46
late SCPs	DAAM2	0.831035	1.94853e-98	0.396
late SCPs	GSN	0.822592	6.14305e-98	0.388
late SCPs	ANKRD50	0.873683	5.24845e-97	0.524
late SCPs	SORBS1	1.02948	6.91156e-97	0.6
late SCPs	RBMS3	0.637654	9.26122e-97	0.968
late SCPs	ZNF536	1.00103	1.83268e-93	0.785
late SCPs	TSPAN11	0.771351	6.84843e-93	0.307
late SCPs	TNS3	0.844265	8.50913e-92	0.46
late SCPs	RHOJ	0.637885	3.75297e-91	0.302
late SCPs	HMGA2	0.826377	4.9982e-91	0.668
late SCPs	NPAS3	0.978834	6.41303e-91	0.63
late SCPs	DMD	0.785575	6.86732e-88	0.858
late SCPs	PRKCA	0.816935	7.76223e-88	0.706
late SCPs	SORCS1	0.773538	4.15985e-87	0.778
late SCPs	EMP2	0.68521	8.60118e-87	0.288
late SCPs	NLGN1	0.830428	4.07102e-85	0.753
late SCPs	SASH1	0.804602	7.16349e-83	0.533
late SCPs	HSPA12A	0.695746	3.04781e-82	0.335
late SCPs	MCAM	0.76598	1.081e-81	0.362
late SCPs	NOTCH1	0.625212	6.1334e-81	0.285
late SCPs	SPRED1	0.894756	3.13332e-80	0.528
late SCPs	NFIA	0.771634	7.52319e-80	0.701
late SCPs	ITGA1	0.945193	3.48116e-79	0.657
late SCPs	COL9A3	0.620072	5.79265e-79	0.261
late SCPs	SRGAP2	0.90787	6.04739e-79	0.608
late SCPs	COL1A1	0.928765	1.09865e-78	0.592
late SCPs	WBSCR17	0.956021	1.01211e-77	0.321
late SCPs	PLEKHA4	0.615578	4.46795e-77	0.269
late SCPs	APP	0.688723	1.02884e-76	0.82
late SCPs	PCDH9	0.78352	2.03332e-76	0.829
late SCPs	TANC1	0.841554	1.64445e-75	0.464
late SCPs	HIF3A	0.670657	8.01008e-74	0.551
late SCPs	LGI4	0.663383	1.2585e-73	0.271
late SCPs	TCF7L1	0.887964	1.47569e-73	0.489
late SCPs	CTDSPL	0.919914	1.6316e-73	0.484
late SCPs	CYP27C1	0.617475	6.06721e-73	0.277
late SCPs	CDK14	0.796777	4.0127e-72	0.604
late SCPs	SDK2	0.775026	7.7749e-71	0.468
late SCPs	PCSK5	0.764127	9.6405e-70	0.408
late SCPs	KIRREL	0.700794	2.58069e-69	0.372
late SCPs	NID1	0.666029	3.32047e-68	0.364
late SCPs	ITGA6	0.708499	5.93499e-68	0.312
late SCPs	NLGN4X	0.876543	1.15239e-67	0.747
late SCPs	ARHGEF10	0.743161	2.6202e-67	0.407
late SCPs	RP11-141M1.3	0.875381	2.77196e-66	0.378
late SCPs	CTNNA3	0.99913	8.57732e-66	0.536
late SCPs	DOCK1	0.703963	2.50632e-65	0.505
late SCPs	STOX2	0.826818	1.16524e-64	0.608
late SCPs	COL1A2	0.820396	1.4199e-64	0.584
late SCPs	EPB41L2	0.809767	4.00367e-64	0.519
late SCPs	PLXDC2	0.769587	1.06318e-63	0.741
late SCPs	HSPG2	0.729877	3.09836e-63	0.416
late SCPs	ZFP36L1	0.880867	6.92414e-63	0.399
late SCPs	PREX1	0.650265	2.25214e-62	0.331
late SCPs	CYP7B1	0.765218	5.46399e-62	0.337
late SCPs	DOCK5	0.660132	1.98582e-61	0.312
late SCPs	LPCAT2	0.656959	3.59969e-61	0.304
late SCPs	SPARC	0.789138	4.20642e-60	0.647
late SCPs	SAMD5	0.620421	1.02217e-59	0.396
late SCPs	VCL	0.734778	9.21901e-58	0.424
late SCPs	YAP1	0.683232	1.34412e-57	0.434
late SCPs	PHLPP1	0.733343	3.47856e-57	0.554
late SCPs	CALD1	0.760501	1.45138e-56	0.609
late SCPs	EPS8	0.673644	2.59658e-56	0.38
late SCPs	NUDT4	0.777405	3.48291e-56	0.375
late SCPs	ZNF804B	0.817126	4.19968e-56	0.294
late SCPs	CASC15	0.575601	4.49008e-56	0.665
late SCPs	ITGA4	0.588777	5.28759e-56	0.282
late SCPs	NCALD	0.801225	6.58056e-56	0.532
late SCPs	ANKRD44	0.81224	2.83563e-55	0.665
late SCPs	METRN	0.760947	3.26362e-55	0.372
late SCPs	DISC1	0.752685	9.41314e-55	0.383
late SCPs	IGFBP7	0.962955	2.16174e-54	0.307
late SCPs	FAM134B	0.695038	2.3393e-54	0.41
late SCPs	KANK1	0.637802	2.50298e-54	0.255
late SCPs	NOTCH2	0.634144	2.50888e-53	0.364
late SCPs	FOXO1	0.734016	2.73759e-53	0.532
late SCPs	PDZD2	0.79341	1.55558e-52	0.457
late SCPs	IGSF11	0.590575	1.78911e-52	0.258
late SCPs	RP11-366L20.2	0.633127	2.16562e-52	0.324
late SCPs	OAF	0.627551	2.17572e-52	0.328
late SCPs	LAMC1	0.73963	3.74283e-52	0.432
late SCPs	POSTN	0.721679	2.00192e-51	0.476
late SCPs	C4orf19	0.618898	2.86647e-50	0.258
late SCPs	LMO4	0.610174	4.47922e-50	0.305
late SCPs	RARB	0.575422	5.45744e-50	0.329
late SCPs	DLEU7	0.53905	2.54314e-49	0.272
late SCPs	USP53	0.677302	6.32588e-49	0.291
late SCPs	TGFBR3	0.861773	7.77014e-48	0.465
late SCPs	TMEM117	0.661573	9.98725e-48	0.434
late SCPs	GAREM	0.67438	1.84323e-47	0.483
late SCPs	PTPN14	0.547036	2.46871e-47	0.35
late SCPs	MAML2	0.678519	3.10497e-47	0.704
late SCPs	VCAN	0.642518	1.37384e-46	0.491
late SCPs	ID3	0.824448	1.49249e-46	0.443
late SCPs	BCHE	0.630162	5.15654e-46	0.388
late SCPs	ADAMTS9	0.733259	5.3153e-46	0.413
late SCPs	MAP3K1	0.627195	5.35691e-46	0.521
late SCPs	GAB1	0.646595	1.3556e-45	0.571
late SCPs	RAI14	0.649419	6.68157e-45	0.35
late SCPs	RP11-307P5.1	0.627901	7.77155e-44	0.29
late SCPs	MEGF9	0.682943	8.20763e-44	0.497
late SCPs	FRMD5	0.603447	1.15441e-43	0.799
late SCPs	ASAP2	0.733035	5.95355e-43	0.503
late SCPs	FBN2	0.758101	1.29553e-42	0.491
late SCPs	FRMD3	0.611814	1.76129e-42	0.356
late SCPs	HES4	0.564264	5.75702e-42	0.271
late SCPs	MAP4K4	0.666318	3.92281e-41	0.684
late SCPs	CREB3L2	0.569219	3.47443e-40	0.358
late SCPs	MID1	0.642974	3.48604e-40	0.358
late SCPs	SPTBN1	0.594688	7.47481e-40	0.685
late SCPs	LPP	0.562652	7.91631e-40	0.693
late SCPs	DNAJC1	0.659683	8.48749e-40	0.541
late SCPs	NR2F2	0.606004	8.50712e-39	0.351
late SCPs	MOB3B	0.565611	1.49584e-38	0.285
late SCPs	CNTN6	0.517512	4.30658e-37	0.259
late SCPs	RGL1	0.584023	1.06455e-36	0.353
late SCPs	ABCD3	0.61127	1.10095e-36	0.381
late SCPs	DAB1	0.683349	2.95527e-36	0.579
late SCPs	TIMP3	0.592654	1.26758e-35	0.714
late SCPs	MOXD1	0.535761	1.77246e-35	0.438
late SCPs	UTRN	0.58624	2.45556e-35	0.593
late SCPs	CRISPLD1	0.508002	5.48423e-35	0.266
late SCPs	LTBP1	0.639108	6.71779e-35	0.361
late SCPs	NHS	0.59834	8.32829e-35	0.495
late SCPs	STK3	0.534589	1.23825e-33	0.457
late SCPs	GPR98	0.917556	2.89186e-33	0.347
late SCPs	GRIK3	0.505234	3.57994e-33	0.592
late SCPs	RCBTB2	0.500203	4.35616e-33	0.283
late SCPs	SIPA1L1	0.627139	7.58331e-33	0.581
late SCPs	MIR181A1HG	0.504086	1.99574e-32	0.293
late SCPs	FRAS1	0.566971	4.6896e-31	0.457
late SCPs	LAMB1	0.616271	1.6391e-30	0.489
late SCPs	PON2	0.525173	2.71153e-30	0.347
late SCPs	LRRC7	0.841938	8.54161e-30	0.413
late SCPs	VIM	0.731013	1.32807e-28	0.606
late SCPs	ELF1	0.584287	2.69841e-27	0.324
late SCPs	PAG1	0.540179	2.94423e-27	0.589
late SCPs	OSBPL10	0.516201	6.08186e-27	0.269
late SCPs	DOK6	0.5425	1.01387e-26	0.388
late SCPs	NR6A1	0.545718	3.3423e-26	0.56
late SCPs	DIP2B	0.537709	4.43715e-26	0.633
late SCPs	MARCKS	0.823873	1.93889e-25	0.511
late SCPs	CHRM3	0.58832	5.64794e-25	0.288
late SCPs	CAMK2D	0.564323	5.78981e-25	0.514
late SCPs	ATF7IP2	0.552084	1.75124e-24	0.316
late SCPs	CNN3	0.503521	1.99855e-24	0.386
late SCPs	INPP4B	0.570127	6.42259e-24	0.388
late SCPs	COL19A1	0.572401	1.06829e-23	0.253
late SCPs	SPATA6	0.547035	1.45639e-23	0.44
late SCPs	KAT2B	0.570365	5.35203e-23	0.351
late SCPs	LIMA1	0.504731	6.81361e-23	0.321
late SCPs	RAP1A	0.574165	8.25598e-23	0.426
late SCPs	CHD7	0.514423	7.08619e-22	0.593
late SCPs	APOE	0.771933	3.50087e-21	0.668
late SCPs	HS6ST3	0.573311	4.17247e-21	0.562
late SCPs	EVI5	0.512615	4.40243e-21	0.509
late SCPs	COL18A1	0.541371	1.27403e-20	0.468
late SCPs	ROR1	0.515513	1.75425e-20	0.527
late SCPs	TOM1L2	0.568879	5.21452e-20	0.483
late SCPs	RALGPS2	0.518653	3.95269e-19	0.479
late SCPs	B2M	0.691302	1.41184e-18	0.464
late SCPs	LEPREL1	0.501779	1.31031e-15	0.326
late SCPs	ATP2B1	0.546905	1.43863e-14	0.453
late SCPs	ADAMTS6	0.558144	1.00303e-07	0.351
late SCPs	ACTB	0.516908	2.52579e-06	0.62
SCPs	PDZRN4	2.34257	0	0.788
SCPs	CDH6	2.25287	0	0.963
SCPs	IL1RAPL2	2.16572	0	0.67
SCPs	PTPRZ1	2.1107	0	0.972
SCPs	MOXD1	2.0921	0	0.941
SCPs	IL1RAPL1	2.08655	0	0.972
SCPs	NKAIN3	1.92128	0	0.958
SCPs	COL5A2	1.90166	0	0.934
SCPs	HMGA2	1.86503	0	0.934
SCPs	TRPM3	1.82411	0	0.947
SCPs	VCAN	1.8019	0	0.896
SCPs	CDH19	1.78106	0	0.884
SCPs	ERBB4	1.75484	0	0.865
SCPs	SOX6	1.73092	0	0.931
SCPs	PTPRJ	1.72521	0	0.942
SCPs	SNTB1	1.72058	0	0.887
SCPs	PRKG1	1.71447	0	0.945
SCPs	MEGF10	1.66559	0	0.824
SCPs	SLC35F1	1.64077	0	0.941
SCPs	MEF2C	1.62203	0	0.955
SCPs	ADAM12	1.62018	0	0.685
SCPs	RP11-152K4.2	1.61515	0	0.706
SCPs	PPFIBP1	1.58281	0	0.913
SCPs	ZEB2	1.52581	0	0.98
SCPs	GRID2	1.51741	0	0.94
SCPs	STARD13	1.49565	0	0.972
SCPs	SOX5	1.46775	0	0.965
SCPs	POSTN	1.46428	0	0.864
SCPs	TGFBR2	1.46102	0	0.804
SCPs	QKI	1.45809	0	0.967
SCPs	LRRTM4	1.44141	0	0.842
SCPs	GPR126	1.42851	0	0.794
SCPs	INSC	1.39143	0	0.759
SCPs	ANKRD50	1.37552	0	0.808
SCPs	NLGN1	1.37403	0	0.969
SCPs	CASC15	1.3513	0	0.925
SCPs	ADAM23	1.32284	0	0.831
SCPs	GLI3	1.31912	0	0.8
SCPs	PLS3	1.29823	0	0.699
SCPs	NR2F2-AS1	1.29425	0	0.84
SCPs	PKNOX2	1.29267	0	0.711
SCPs	RP11-436K8.1	1.29224	0	0.744
SCPs	RP11-366L20.2	1.27399	0	0.625
SCPs	CELF2	1.27267	0	0.889
SCPs	RP11-776H12.1	1.24094	0	0.687
SCPs	SASH1	1.22985	0	0.796
SCPs	COL25A1	1.21947	0	0.704
SCPs	NCALD	1.18774	0	0.815
SCPs	DOCK1	1.1743	0	0.786
SCPs	ITGB5	1.17277	0	0.536
SCPs	EPS8	1.16064	0	0.656
SCPs	ITGA4	1.14807	0	0.606
SCPs	TMEM117	1.11268	0	0.706
SCPs	TMEM2	1.10186	0	0.576
SCPs	VCAN-AS1	1.03707	0	0.483
SCPs	TCF7L1	1.02006	0	0.734
SCPs	GPM6B	1.01205	0	0.715
SCPs	ARHGAP42	1.0046	0	0.688
SCPs	EDNRB	0.994242	0	0.602
SCPs	HMCN1	0.986433	0	0.483
SCPs	KIAA1755	0.952215	0	0.487
SCPs	FHDC1	0.94944	0	0.523
SCPs	LMO3	0.937423	0	0.406
SCPs	RFTN2	0.921148	0	0.578
SCPs	RP11-413B19.2	0.920225	0	0.317
SCPs	ETS1	0.919702	0	0.551
SCPs	STXBP6	0.903371	0	0.388
SCPs	TMEM132B	0.893308	0	0.438
SCPs	ERBB3	0.892444	0	0.521
SCPs	ARHGEF26	0.879648	0	0.551
SCPs	RHOJ	0.801765	0	0.453
SCPs	PLA2G4A	0.797353	0	0.406
SCPs	LGI4	0.782155	0	0.465
SCPs	SOX10	0.780913	0	0.454
SCPs	COL20A1	0.645197	0	0.31
SCPs	AC090673.2	0.63826	0	0.334
SCPs	SGK223	0.998467	2.58918e-303	0.439
SCPs	NKAIN2	1.41434	1.62767e-299	0.585
SCPs	ARAP2	0.722765	8.72955e-299	0.383
SCPs	BCHE	0.920159	7.80128e-295	0.645
SCPs	MAP3K1	1.14563	3.55299e-293	0.796
SCPs	WWTR1	1.08249	1.08902e-291	0.786
SCPs	NOTCH2	0.908378	5.17714e-291	0.592
SCPs	ABCA8	0.882275	8.51392e-289	0.469
SCPs	CRISPLD1	0.834991	1.5942e-288	0.496
SCPs	RP11-366L20.3	0.582619	9.78032e-286	0.299
SCPs	SPRED1	1.09455	1.83193e-278	0.738
SCPs	MPZ	0.664496	6.50996e-277	0.419
SCPs	FRMD6	0.844018	5.8448e-276	0.564
SCPs	PREX1	0.813858	6.09403e-276	0.514
SCPs	OLFML2A	0.834573	2.50545e-275	0.483
SCPs	NFIA	1.11651	2.52555e-274	0.902
SCPs	PARD3	1.03722	5.73572e-274	0.989
SCPs	CDK14	1.07063	6.73038e-272	0.826
SCPs	SHC4	0.738125	2.93712e-266	0.381
SCPs	MYO10	0.912893	4.54864e-259	0.539
SCPs	DAAM2	0.766991	1.20505e-257	0.525
SCPs	PTPN14	0.891725	5.32907e-254	0.553
SCPs	CYP27C1	0.680485	1.2207e-253	0.405
SCPs	AHR	0.778982	6.51906e-247	0.424
SCPs	PARD3B	1.14069	1.84872e-246	0.845
SCPs	NAALADL2	1.09054	9.9184e-245	0.837
SCPs	SORCS1	1.0083	4.88033e-243	0.929
SCPs	SEMA3C	0.946301	1.72165e-239	0.524
SCPs	TGFB2	0.69357	3.88279e-235	0.333
SCPs	PRICKLE2	1.07481	2.07967e-234	0.858
SCPs	PTPN13	0.80615	8.96164e-234	0.605
SCPs	PLP1	0.646869	5.21808e-233	0.383
SCPs	GAB1	1.04392	6.75415e-233	0.81
SCPs	YAP1	0.817201	3.77299e-232	0.636
SCPs	PHLDB2	0.753735	4.21818e-232	0.464
SCPs	NUDT4	0.879564	1.70434e-229	0.559
SCPs	SOX13	0.653046	1.54557e-226	0.366
SCPs	LSAMP	0.875638	5.67814e-223	0.994
SCPs	AFAP1L2	0.617082	6.34004e-223	0.332
SCPs	FOLH1	0.612968	1.17609e-222	0.31
SCPs	RBMS3	0.758589	3.13435e-222	0.998
SCPs	LMO4	0.733581	1.45503e-220	0.469
SCPs	CHST9	0.842858	5.26147e-220	0.393
SCPs	GAS7	0.991293	1.42423e-218	0.799
SCPs	KIRREL	0.801404	3.04667e-217	0.509
SCPs	GAREM	0.943704	7.06621e-217	0.694
SCPs	ID4	0.636332	6.08796e-216	0.285
SCPs	WLS	0.709283	6.4955e-216	0.477
SCPs	KIF13B	0.992918	3.86245e-214	0.77
SCPs	DST	0.819094	1.07623e-213	0.989
SCPs	MIR181A1HG	0.769256	2.18629e-213	0.492
SCPs	DISC1	0.868572	1.06833e-212	0.551
SCPs	DLGAP1	1.22622	2.47632e-210	0.936
SCPs	CNTN4	1.13608	9.06515e-209	0.854
SCPs	PLEKHA4	0.631424	1.34369e-208	0.356
SCPs	MAP4K4	0.953137	1.46354e-208	0.923
SCPs	RARB	0.727892	4.68036e-208	0.488
SCPs	PDE7B	1.02117	9.87431e-207	0.512
SCPs	GNG12-AS1	0.696239	2.66763e-206	0.427
SCPs	RASGEF1C	0.559725	5.41048e-205	0.306
SCPs	CPED1	0.767899	8.22625e-205	0.482
SCPs	SSFA2	0.745331	9.13319e-205	0.519
SCPs	ZNF536	1.01714	3.23783e-204	0.92
SCPs	GFRA1	0.802383	3.96697e-202	0.514
SCPs	ALDH1A1	0.955325	1.00737e-200	0.376
SCPs	PPAP2A	1.01262	1.78441e-200	0.726
SCPs	EFNB2	0.971455	1.49777e-199	0.629
SCPs	SLITRK6	0.524404	2.08966e-198	0.275
SCPs	COL11A1	1.13146	3.31022e-198	0.585
SCPs	PRKCA	1.02015	1.28793e-196	0.821
SCPs	FRMD4A	0.879132	3.87873e-196	0.96
SCPs	ITGA1	0.967659	2.74277e-194	0.812
SCPs	HS3ST4	1.17161	2.88905e-194	0.747
SCPs	TANC1	0.785829	2.66128e-192	0.601
SCPs	GPC6	0.840962	3.12652e-191	0.991
SCPs	MAML2	0.947553	2.27613e-189	0.901
SCPs	KIAA1217	0.890118	4.71444e-187	0.668
SCPs	PDZRN3	1.0673	1.84551e-186	0.854
SCPs	SYNPR	0.955469	5.39104e-186	0.368
SCPs	POLR2F	0.801196	1.07137e-184	0.536
SCPs	DNAJC1	0.905344	2.01744e-184	0.77
SCPs	FGD4	0.808875	2.48627e-183	0.739
SCPs	TNS3	0.705809	1.42376e-182	0.558
SCPs	ROR1	0.856282	3.01445e-182	0.816
SCPs	SIPA1L1	0.949842	1.1821e-181	0.819
SCPs	NGFR	0.624818	2.2622e-181	0.346
SCPs	C4orf19	0.664583	2.58568e-181	0.372
SCPs	LINC00478	0.890215	3.42205e-181	0.834
SCPs	IL1RAP	0.839691	5.65213e-181	0.354
SCPs	GULP1	0.822557	8.29279e-181	0.891
SCPs	COL2A1	0.542113	1.64504e-180	0.343
SCPs	ASAP2	0.999458	2.70655e-179	0.705
SCPs	ITGA2	0.585093	3.91301e-178	0.339
SCPs	FRAS1	0.834437	5.32049e-178	0.692
SCPs	PLEKHG1	0.742435	6.37978e-178	0.458
SCPs	VCL	0.798913	3.79045e-177	0.564
SCPs	PDE4B	0.865595	9.10442e-177	0.753
SCPs	TNIK	0.948552	1.59503e-176	0.797
SCPs	RP11-945C19.4	0.529868	3.41491e-176	0.3
SCPs	OAF	0.646772	6.7206e-174	0.458
SCPs	CNTN6	0.913985	3.30501e-173	0.392
SCPs	COL9A3	0.548338	8.00208e-172	0.319
SCPs	NID1	0.60369	1.53751e-171	0.469
SCPs	C3orf70	0.531468	2.56013e-170	0.295
SCPs	FAM13A	0.741196	6.25494e-170	0.649
SCPs	KAT2B	0.755736	1.16416e-169	0.574
SCPs	LPP	0.852247	7.59113e-169	0.885
SCPs	OSBPL10	0.684288	2.40683e-168	0.442
SCPs	CHD7	0.811694	4.29727e-168	0.869
SCPs	AQP4-AS1	0.824898	9.82607e-165	0.39
SCPs	RGL1	0.703533	8.15799e-164	0.524
SCPs	AC008937.2	0.59228	8.24634e-164	0.343
SCPs	NOTCH1	0.528797	7.36548e-162	0.339
SCPs	LGR4	0.832094	1.87323e-160	0.601
SCPs	ZNF521	0.772568	4.82831e-160	0.67
SCPs	PRKD1	0.837557	7.6647e-160	0.772
SCPs	PHLDB1	0.659648	2.79941e-157	0.556
SCPs	ITGA6	0.692569	7.24256e-156	0.386
SCPs	COL23A1	0.759646	8.13495e-155	0.35
SCPs	FBN3	0.556439	6.62133e-154	0.354
SCPs	LHFPL2	0.707386	9.38221e-153	0.572
SCPs	XKR4	1.0899	5.90922e-152	0.636
SCPs	FIGN	0.864332	6.46934e-151	0.764
SCPs	FOXO1	0.761115	4.6624e-150	0.696
SCPs	ID3	0.884031	2.51743e-149	0.581
SCPs	ACSS3	0.528255	7.66089e-149	0.332
SCPs	OXR1	0.841271	1.20539e-148	0.692
SCPs	ST6GALNAC3	0.812415	1.66069e-148	0.728
SCPs	CTD-3088G3.8	0.83909	2.19749e-148	0.315
SCPs	UTRN	0.812034	1.26013e-147	0.778
SCPs	NHS	0.872646	1.73981e-146	0.671
SCPs	STK3	0.707336	4.92096e-146	0.641
SCPs	SDK2	0.636184	8.62791e-146	0.574
SCPs	COL18A1	0.754582	1.43376e-145	0.714
SCPs	COL4A2	0.668788	1.57728e-144	0.611
SCPs	ST8SIA5	0.592569	5.07595e-144	0.351
SCPs	INPP4B	0.954974	8.65423e-144	0.575
SCPs	CDC14A	0.638924	2.92466e-142	0.487
SCPs	KCNIP1	0.650222	3.33554e-142	0.415
SCPs	UST	0.759021	5.44306e-140	0.599
SCPs	TBX2	0.851999	7.29811e-140	0.663
SCPs	LAMA4	0.707401	9.31059e-140	0.661
SCPs	TMTC2	0.97104	9.20277e-139	0.777
SCPs	B4GALT6	0.532248	8.81375e-138	0.355
SCPs	GRIK2	0.751354	2.2868e-135	0.962
SCPs	AFF2	0.733694	9.65556e-135	0.447
SCPs	KCNH8	0.862241	7.58506e-134	0.673
SCPs	NR6A1	0.769188	4.36648e-133	0.759
SCPs	MMP17	0.712565	4.75342e-131	0.633
SCPs	RP11-649G15.2	0.619476	2.03406e-130	0.279
SCPs	ST5	0.595047	2.34031e-128	0.488
SCPs	ARHGEF10	0.582322	1.0603e-127	0.479
SCPs	LIMD1	0.507017	1.27434e-127	0.319
SCPs	TAOK3	0.684501	1.77016e-127	0.61
SCPs	ADAMTSL1	0.88274	2.65369e-127	0.282
SCPs	DOK6	0.703284	1.55378e-126	0.556
SCPs	LIMA1	0.640481	1.42886e-125	0.483
SCPs	HOXB3	0.541317	8.54261e-125	0.372
SCPs	UACA	0.56035	9.43646e-125	0.43
SCPs	MEGF9	0.739326	2.2915e-124	0.638
SCPs	NOX4	0.553258	1.70097e-121	0.338
SCPs	MCAM	0.649232	1.78309e-120	0.387
SCPs	SUCLG2	0.589577	2.56081e-120	0.496
SCPs	FKBP10	0.632167	2.777e-120	0.576
SCPs	CACHD1	0.588744	9.61408e-120	0.507
SCPs	FBN1	0.625346	1.75568e-119	0.458
SCPs	MOB3B	0.564271	1.3578e-118	0.379
SCPs	RP11-696N14.1	0.530989	5.23774e-118	0.322
SCPs	NRIP1	0.659322	7.80995e-118	0.692
SCPs	PEAK1	0.714966	9.57984e-118	0.657
SCPs	FAM3C	0.63258	3.80483e-117	0.548
SCPs	RP11-444D3.1	0.81331	3.55013e-116	0.769
SCPs	CTD-2647L4.1	0.502202	1.0482e-113	0.302
SCPs	DPY19L3	0.641322	1.22401e-113	0.569
SCPs	TCF7L2	0.64603	6.59314e-113	0.749
SCPs	FLNA	0.552802	1.26146e-112	0.448
SCPs	RBMS2	0.520055	3.75369e-112	0.403
SCPs	ANKRD44	0.679216	1.10295e-111	0.799
SCPs	RALGPS2	0.664611	8.12382e-111	0.688
SCPs	CEP112	0.58995	1.22878e-110	0.528
SCPs	SRGAP2	0.598301	2.02309e-110	0.682
SCPs	RAP1GDS1	0.633716	2.13679e-109	0.683
SCPs	MVB12B	0.664583	2.49742e-109	0.744
SCPs	ARHGEF35	0.663862	4.24519e-109	0.496
SCPs	PLAT	0.516567	2.28452e-108	0.394
SCPs	ERBB2IP	0.650104	1.17405e-107	0.761
SCPs	LAMC1	0.627828	7.05645e-106	0.514
SCPs	ETV6	0.650217	9.01391e-106	0.71
SCPs	TRPS1	0.605202	4.07046e-105	0.585
SCPs	MIR181A2HG	0.557969	1.27927e-104	0.528
SCPs	PTPRM	0.775897	1.33513e-104	0.8
SCPs	SPATA6	0.622232	1.31544e-103	0.607
SCPs	ANTXR1	0.634536	2.63688e-103	0.52
SCPs	UBL3	0.658415	2.96022e-103	0.551
SCPs	PTK2	0.526878	4.02647e-103	0.951
SCPs	RP11-37B2.1	0.538497	1.22605e-102	0.437
SCPs	SPTBN1	0.667687	7.52332e-102	0.805
SCPs	MAP4K5	0.601224	1.3943e-101	0.809
SCPs	RAD51B	0.687399	3.29112e-101	0.712
SCPs	RNF130	0.58273	1.72731e-99	0.83
SCPs	CHST11	0.728795	6.30156e-99	0.507
SCPs	NRXN3	0.767773	4.38409e-98	0.641
SCPs	CTDSPL	0.604427	9.44112e-98	0.528
SCPs	NPAS3	0.708093	1.70208e-97	0.634
SCPs	NPR3	0.625758	3.44688e-97	0.431
SCPs	RAI14	0.570539	5.01862e-97	0.419
SCPs	KCNK2	0.514803	2.03405e-96	0.279
SCPs	LPHN2	0.57518	1.5026e-95	0.857
SCPs	OSBPL1A	0.501045	5.80468e-95	0.501
SCPs	LRCH1	0.593091	1.91205e-94	0.639
SCPs	AKAP13	0.527175	3.96897e-93	0.837
SCPs	ZFP36L1	0.509728	1.17397e-92	0.436
SCPs	CHL1	0.600123	3.00296e-90	0.348
SCPs	NCAM2	0.706058	4.21463e-90	0.882
SCPs	RAPGEF2	0.589864	4.46043e-90	0.803
SCPs	GTDC1	0.624039	1.45597e-89	0.726
SCPs	ST6GAL1	0.500407	3.9934e-89	0.42
SCPs	BICC1	0.523142	5.28867e-89	0.562
SCPs	PHLPP1	0.563328	7.6045e-89	0.624
SCPs	DAB1	0.593364	1.11624e-88	0.707
SCPs	ARNT2	0.530009	1.95586e-88	0.486
SCPs	LINC01057	0.575094	4.37183e-88	0.486
SCPs	DDAH1	0.583325	1.1419e-87	0.397
SCPs	CYP7B1	0.543795	5.77061e-87	0.356
SCPs	ANXA2	0.648054	2.59092e-86	0.496
SCPs	DOCK10	0.578183	3.69274e-86	0.77
SCPs	TENM3	0.520446	5.02413e-86	0.972
SCPs	PALLD	0.627233	1.32163e-85	0.621
SCPs	LRCH3	0.555694	6.44977e-85	0.787
SCPs	C10orf11	0.63943	8.43055e-85	0.513
SCPs	KIAA0922	0.53554	1.19528e-83	0.581
SCPs	MICAL3	0.61091	4.53633e-83	0.66
SCPs	FOXP2	0.615513	2.99898e-82	0.537
SCPs	KIF13A	0.539997	3.20801e-82	0.659
SCPs	DNAH14	0.669702	1.46099e-81	0.674
SCPs	AFF3	0.591196	1.57217e-81	0.727
SCPs	RBPMS	0.548097	2.33792e-80	0.508
SCPs	MEF2C-AS1	0.524304	2.99981e-80	0.45
SCPs	USP53	0.582113	8.6923e-80	0.318
SCPs	VWA8	0.548683	1.3802e-79	0.662
SCPs	VIM	0.576797	5.19623e-79	0.752
SCPs	ARHGEF12	0.505876	1.76756e-78	0.734
SCPs	PLXDC2	0.636851	2.25789e-78	0.802
SCPs	USP25	0.50874	4.68972e-78	0.512
SCPs	MED12L	0.621783	1.79343e-77	0.606
SCPs	ARHGAP5	0.520244	4.36401e-76	0.621
SCPs	PRICKLE1	0.610678	8.48162e-76	0.422
SCPs	RP11-242P2.1	0.557096	8.52768e-76	0.285
SCPs	PCDH7	0.675103	4.00062e-75	0.8
SCPs	PTPN12	0.513908	7.51486e-75	0.701
SCPs	RP11-141M1.3	0.561134	1.11043e-74	0.377
SCPs	SVIL	0.579929	9.60238e-74	0.646
SCPs	KLF12	0.513836	1.74836e-73	0.842
SCPs	IMMP2L	0.621744	2.61025e-72	0.873
SCPs	PLCB4	0.537057	5.38768e-72	0.836
SCPs	TFDP2	0.54993	6.40059e-70	0.716
SCPs	GPC3	0.647226	1.79095e-69	0.553
SCPs	CDC73	0.50444	4.21488e-69	0.612
SCPs	HIVEP1	0.515853	5.57178e-68	0.465
SCPs	MARCKS	0.526352	2.91905e-66	0.632
SCPs	ST8SIA1	0.528041	4.65595e-65	0.496
SCPs	RP11-123O10.4	0.54442	2.0066e-63	0.491
SCPs	MMP16	0.7097	5.24664e-63	0.709
SCPs	FREM1	0.677808	1.4357e-62	0.438
SCPs	CAMK2D	0.509118	4.95229e-62	0.636
SCPs	ADAMTS6	0.595037	1.92854e-61	0.51
SCPs	BACH1	0.563355	2.14041e-60	0.541
SCPs	LMCD1-AS1	0.5356	2.38952e-56	0.607
SCPs	CTNNA3	0.540918	7.1892e-54	0.528
SCPs	TLE4	0.608007	6.74661e-46	0.71
SCPs	LRRC7	0.529886	3.00235e-43	0.454
SCPs	KHDRBS2	0.510252	1.75639e-38	0.366
SCPs	ENOX1	0.507967	1.66578e-36	0.797
cycling SCPs	CDH19	1.28335	2.35234e-262	0.906
cycling SCPs	MEGF10	1.31814	3.44059e-255	0.833
cycling SCPs	PKNOX2	1.17297	1.45493e-249	0.799
cycling SCPs	ARHGAP11B	1.49449	2.48894e-240	0.854
cycling SCPs	PDZRN4	1.7795	2.60678e-239	0.799
cycling SCPs	PTPRZ1	1.56471	3.78272e-238	0.965
cycling SCPs	INSC	1.1122	8.06589e-236	0.76
cycling SCPs	CDH6	1.61278	6.56692e-235	0.951
cycling SCPs	GPR126	1.12764	1.11293e-228	0.826
cycling SCPs	C2orf48	0.908739	1.47194e-223	0.556
cycling SCPs	KIF18B	0.99855	3.24863e-223	0.601
cycling SCPs	MOXD1	1.72237	9.96404e-223	0.934
cycling SCPs	SNTB1	1.42297	5.49067e-220	0.913
cycling SCPs	STXBP6	0.903272	8.24608e-217	0.514
cycling SCPs	ITGA4	0.965336	5.15029e-216	0.649
cycling SCPs	RP11-152K4.2	1.04864	1.18954e-212	0.715
cycling SCPs	GLI3	1.16863	3.12334e-212	0.896
cycling SCPs	COL5A2	1.54487	3.76844e-209	0.955
cycling SCPs	C21orf58	1.14975	1.62804e-208	0.792
cycling SCPs	IL1RAPL1	1.654	8.83594e-207	0.986
cycling SCPs	MELK	0.903044	1.05995e-205	0.674
cycling SCPs	RP11-366L20.2	1.03458	2.64537e-200	0.722
cycling SCPs	CDC25C	0.90278	3.29718e-198	0.549
cycling SCPs	DIAPH3	1.35163	5.43399e-198	0.906
cycling SCPs	CENPE	1.12601	8.93847e-196	0.59
cycling SCPs	KIF4A	0.81507	5.66281e-188	0.549
cycling SCPs	ADAM12	1.29964	1.51496e-187	0.747
cycling SCPs	KIF11	0.836866	3.83009e-185	0.562
cycling SCPs	CENPK	1.00004	6.3541e-185	0.729
cycling SCPs	BUB1B	0.784556	4.17735e-184	0.517
cycling SCPs	IL1RAPL2	1.42961	1.75067e-182	0.747
cycling SCPs	LINC00669	1.62127	1.75109e-182	0.91
cycling SCPs	ASPM	1.22882	2.17479e-182	0.694
cycling SCPs	RTKN2	0.750923	4.8518e-177	0.51
cycling SCPs	PLS3	1.03483	2.26223e-174	0.76
cycling SCPs	RP11-436K8.1	1.08026	2.39927e-174	0.785
cycling SCPs	FHDC1	0.801969	6.80864e-173	0.604
cycling SCPs	POLQ	0.826106	8.17907e-173	0.653
cycling SCPs	TRPM3	1.39847	3.15219e-171	0.969
cycling SCPs	NDC80	0.689109	9.8847e-171	0.493
cycling SCPs	MYBL1	0.539272	2.85995e-167	0.396
cycling SCPs	CASC5	0.976958	5.14023e-165	0.653
cycling SCPs	POSTN	1.10407	1.62389e-162	0.889
cycling SCPs	ANKRD50	1.15317	1.80863e-162	0.847
cycling SCPs	HMGA2	1.56449	6.17494e-162	0.951
cycling SCPs	DEPDC1B	0.825585	7.59713e-162	0.549
cycling SCPs	KIAA1755	0.777783	1.79561e-161	0.51
cycling SCPs	TGFBR2	1.04465	9.74704e-156	0.826
cycling SCPs	EPS8	1.00929	2.60627e-155	0.733
cycling SCPs	BRIP1	1.05488	4.17195e-155	0.729
cycling SCPs	CIT	0.866026	2.15216e-154	0.684
cycling SCPs	GTSE1	0.774858	2.23965e-154	0.521
cycling SCPs	IQGAP3	0.634117	1.0743e-153	0.406
cycling SCPs	FANCB	0.63879	1.2908e-152	0.427
cycling SCPs	SOX10	0.700614	2.98433e-152	0.531
cycling SCPs	VCAN	1.3082	4.8955e-152	0.885
cycling SCPs	ERBB3	0.665017	6.27222e-152	0.545
cycling SCPs	NKAIN3	1.44592	8.03175e-151	0.983
cycling SCPs	PLA2G4A	0.689671	4.04794e-150	0.476
cycling SCPs	ARHGEF26	0.86766	9.34317e-150	0.635
cycling SCPs	SLC35F1	1.34057	1.82748e-149	0.955
cycling SCPs	ECT2	0.796738	2.27334e-149	0.535
cycling SCPs	ARHGAP11A	0.634499	3.32035e-149	0.434
cycling SCPs	KIF15	0.773978	3.73726e-149	0.566
cycling SCPs	HMCN1	0.887232	7.48302e-149	0.528
cycling SCPs	CELF2	1.15359	6.46583e-148	0.91
cycling SCPs	SGOL1	0.525108	8.67847e-146	0.368
cycling SCPs	CENPF	1.10318	3.60148e-145	0.701
cycling SCPs	RP11-366L20.3	0.57985	4.41776e-145	0.361
cycling SCPs	GLRA2	0.743297	5.50632e-145	0.399
cycling SCPs	PARPBP	0.738752	9.67621e-144	0.517
cycling SCPs	CCDC150	0.710961	1.91688e-143	0.549
cycling SCPs	SGK223	0.89538	9.14028e-143	0.514
cycling SCPs	TOP2A	1.08336	3.08314e-141	0.705
cycling SCPs	TACC3	0.667667	7.71823e-140	0.431
cycling SCPs	FANCI	0.751533	1.19106e-137	0.597
cycling SCPs	NCAPG	0.715022	5.59497e-137	0.5
cycling SCPs	PPFIBP1	1.14238	6.71502e-137	0.913
cycling SCPs	CDCA2	0.640804	8.74555e-137	0.378
cycling SCPs	CENPI	0.654273	1.6287e-136	0.472
cycling SCPs	PREX1	0.76554	2.11764e-136	0.611
cycling SCPs	CEP112	1.07535	2.61425e-136	0.799
cycling SCPs	RP11-776H12.1	0.835789	5.05379e-136	0.691
cycling SCPs	FBN3	0.713297	1.16918e-135	0.521
cycling SCPs	NLGN1	1.36827	1.38928e-135	0.983
cycling SCPs	STIL	0.608355	1.43994e-135	0.441
cycling SCPs	TPX2	0.775261	2.52457e-135	0.549
cycling SCPs	SGOL2	0.742184	6.99325e-135	0.438
cycling SCPs	ERBB4	1.42165	3.58905e-134	0.837
cycling SCPs	NR2F2-AS1	1.14066	7.17637e-134	0.858
cycling SCPs	RP11-120D5.1	0.908994	7.33038e-134	0.531
cycling SCPs	VCAN-AS1	0.630547	1.87629e-133	0.438
cycling SCPs	GAS2L3	0.742161	1.22043e-132	0.469
cycling SCPs	LGI4	0.618661	1.3794e-131	0.483
cycling SCPs	ANLN	0.723569	6.98307e-131	0.528
cycling SCPs	ARHGAP42	0.905174	1.74445e-129	0.76
cycling SCPs	KIF18A	0.737564	2.64326e-129	0.441
cycling SCPs	PRKG1	1.28617	1.06704e-128	0.965
cycling SCPs	AURKB	0.657228	3.17101e-127	0.424
cycling SCPs	EDNRB	0.693484	3.91652e-127	0.632
cycling SCPs	ZEB2	1.21895	4.94304e-126	0.986
cycling SCPs	CDK14	1.10683	4.92915e-125	0.913
cycling SCPs	KIF2C	0.574267	1.16093e-124	0.389
cycling SCPs	TMEM117	0.952063	1.82663e-124	0.778
cycling SCPs	C4orf19	0.692626	2.61065e-124	0.5
cycling SCPs	PTPRJ	1.22826	2.80465e-124	0.938
cycling SCPs	SPC25	0.687657	4.72605e-124	0.576
cycling SCPs	MIS18BP1	1.00902	7.66785e-124	0.823
cycling SCPs	STARD13	1.11713	6.63367e-123	0.972
cycling SCPs	KIF20B	0.79204	1.54986e-122	0.608
cycling SCPs	BUB1	0.614147	1.67294e-122	0.42
cycling SCPs	BLM	0.61935	5.09918e-122	0.455
cycling SCPs	QKI	1.10498	7.85005e-122	0.986
cycling SCPs	KIFC1	0.503319	1.21344e-121	0.399
cycling SCPs	YAP1	0.843941	1.27248e-121	0.76
cycling SCPs	SMC4	0.912726	2.84771e-121	0.788
cycling SCPs	ALDH1A1	0.850799	6.87041e-121	0.483
cycling SCPs	RP11-413B19.2	0.623861	1.22557e-119	0.319
cycling SCPs	GPM6B	0.917418	5.12166e-119	0.767
cycling SCPs	ITGB5	0.690836	3.01055e-118	0.545
cycling SCPs	ADAM23	1.04973	3.64811e-118	0.892
cycling SCPs	KIF23	0.645634	1.08861e-117	0.399
cycling SCPs	CRISPLD1	0.730425	1.09898e-117	0.549
cycling SCPs	AC090673.2	0.550457	4.16041e-117	0.347
cycling SCPs	NCAPD2	0.62874	7.15609e-117	0.503
cycling SCPs	KIF14	0.799474	8.83177e-117	0.424
cycling SCPs	AHR	0.686945	1.11959e-116	0.497
cycling SCPs	EZH2	0.97208	1.95783e-116	0.858
cycling SCPs	LMO4	0.758438	2.53933e-116	0.566
cycling SCPs	LMO3	0.558822	4.17982e-116	0.368
cycling SCPs	KIRREL	0.801704	1.71269e-115	0.615
cycling SCPs	SPRED1	0.987984	4.5971e-115	0.806
cycling SCPs	AC004158.2	0.891323	7.63423e-115	0.681
cycling SCPs	TCF7L1	0.939611	7.7629e-115	0.778
cycling SCPs	COL25A1	1.00518	8.12649e-115	0.75
cycling SCPs	PDE4B	1.08665	1.05653e-113	0.892
cycling SCPs	BRCA2	0.512884	1.60274e-113	0.382
cycling SCPs	NOTCH2	0.73787	2.43743e-113	0.649
cycling SCPs	MKI67	0.728634	2.988e-112	0.538
cycling SCPs	SOX6	1.15284	6.27241e-112	0.889
cycling SCPs	AP001347.6	0.83977	8.04518e-112	0.788
cycling SCPs	UACA	0.856586	1.04367e-111	0.604
cycling SCPs	NDE1	0.650075	1.40011e-111	0.424
cycling SCPs	SASH1	0.8725	4.92352e-111	0.806
cycling SCPs	TMEM2	0.854514	8.52625e-111	0.601
cycling SCPs	MYO10	0.80961	1.29381e-110	0.601
cycling SCPs	NCALD	1.00338	6.59543e-110	0.851
cycling SCPs	PHLDB2	0.685889	1.58978e-109	0.542
cycling SCPs	SHC4	0.636707	3.10602e-109	0.42
cycling SCPs	BARD1	0.692515	9.83875e-109	0.486
cycling SCPs	RP1-167A14.2	0.677266	1.19687e-108	0.552
cycling SCPs	ARAP2	0.61937	2.27065e-108	0.403
cycling SCPs	GRID2	1.29498	1.70181e-107	0.951
cycling SCPs	MEF2C	1.1335	4.37602e-107	0.938
cycling SCPs	PIF1	0.69791	1.58012e-106	0.309
cycling SCPs	KIAA1217	0.955015	8.51472e-106	0.802
cycling SCPs	LRRTM4	0.963296	3.0677e-105	0.882
cycling SCPs	NUSAP1	0.700416	4.63197e-105	0.538
cycling SCPs	GINS1	0.576938	8.05226e-105	0.41
cycling SCPs	DOCK1	0.859284	5.27498e-104	0.788
cycling SCPs	PARD3B	1.06956	6.4896e-104	0.927
cycling SCPs	RFTN2	0.651177	1.62696e-102	0.587
cycling SCPs	SPATA5	0.895705	3.11367e-102	0.868
cycling SCPs	CPED1	0.810451	7.32289e-102	0.566
cycling SCPs	COL2A1	0.572981	1.25895e-101	0.427
cycling SCPs	ABCA8	0.65636	1.73001e-101	0.49
cycling SCPs	KNTC1	0.697736	5.09768e-101	0.552
cycling SCPs	AFAP1L2	0.545321	2.35515e-100	0.382
cycling SCPs	NFIA	1.0607	3.57528e-100	0.913
cycling SCPs	COL23A1	0.910743	7.84156e-100	0.451
cycling SCPs	WWTR1	0.844345	4.21335e-98	0.812
cycling SCPs	NUF2	0.692824	5.03571e-98	0.556
cycling SCPs	RAD51AP1	0.584891	5.97073e-98	0.396
cycling SCPs	TANC1	0.796587	1.14516e-97	0.705
cycling SCPs	ST8SIA5	0.597626	3.39414e-97	0.469
cycling SCPs	RAD54B	0.507184	6.44927e-97	0.406
cycling SCPs	OSBPL10	0.696777	7.9769e-97	0.549
cycling SCPs	ETS1	0.686892	1.3557e-96	0.549
cycling SCPs	PRIM2	0.852658	2.27535e-96	0.806
cycling SCPs	ARHGAP15	0.716885	7.47466e-96	0.431
cycling SCPs	RAD51B	1.03772	1.62557e-94	0.892
cycling SCPs	TMEM132B	0.596312	7.63972e-94	0.431
cycling SCPs	PDE7B	0.885312	1.09623e-92	0.583
cycling SCPs	PARD3	0.853696	9.10659e-92	0.99
cycling SCPs	CASC15	0.951708	2.52775e-91	0.92
cycling SCPs	HOXB3	0.618857	3.49996e-91	0.503
cycling SCPs	NHS	0.870666	5.95978e-91	0.837
cycling SCPs	SSFA2	0.693786	7.79699e-91	0.59
cycling SCPs	MMS22L	0.786912	1.43802e-90	0.694
cycling SCPs	CEP128	0.798229	2.01678e-90	0.764
cycling SCPs	DNA2	0.542512	3.93647e-90	0.469
cycling SCPs	MIR181A1HG	0.712209	1.44723e-88	0.545
cycling SCPs	NAALADL2	0.954126	2.45937e-88	0.885
cycling SCPs	MAML2	0.905488	8.6192e-88	0.955
cycling SCPs	DLGAP5	0.569461	9.86534e-88	0.33
cycling SCPs	MXD3	0.523618	2.69599e-87	0.375
cycling SCPs	PLCE1	0.729866	4.18772e-87	0.535
cycling SCPs	FRMD6	0.630468	6.41599e-87	0.569
cycling SCPs	MDFIC	0.568106	1.44661e-86	0.462
cycling SCPs	RHOJ	0.580812	2.5396e-86	0.417
cycling SCPs	MOB3B	0.751239	3.29557e-86	0.5
cycling SCPs	STK3	0.749018	3.31661e-86	0.781
cycling SCPs	TNS3	0.686882	6.25111e-86	0.646
cycling SCPs	NKAIN2	0.934368	6.4729e-86	0.573
cycling SCPs	VGLL3	0.512622	6.63496e-86	0.292
cycling SCPs	RARB	0.600145	2.30723e-85	0.545
cycling SCPs	ASAP2	0.907515	3.19106e-85	0.799
cycling SCPs	MID1	0.767973	1.1338e-84	0.608
cycling SCPs	GNG12-AS1	0.534159	2.70964e-84	0.476
cycling SCPs	CNTN6	0.718338	2.89452e-84	0.465
cycling SCPs	DISC1	0.73573	4.76825e-84	0.604
cycling SCPs	SOX5	0.90605	6.80756e-84	0.944
cycling SCPs	BRCA1	0.610754	1.57468e-83	0.497
cycling SCPs	CTC-260E6.6	0.728772	1.65209e-83	0.708
cycling SCPs	FIGN	0.925388	1.0067e-82	0.878
cycling SCPs	NOTCH1	0.514929	1.77115e-82	0.406
cycling SCPs	COL11A1	0.845944	3.96421e-82	0.653
cycling SCPs	KIF13B	0.829955	5.62878e-82	0.826
cycling SCPs	PRKD1	0.905985	8.71325e-82	0.865
cycling SCPs	UTRN	0.833132	1.02845e-81	0.896
cycling SCPs	GAREM	0.798602	4.44097e-81	0.747
cycling SCPs	GFRA1	0.660615	8.05792e-81	0.566
cycling SCPs	CNTN4	0.961571	3.94854e-80	0.917
cycling SCPs	ARHGEF10	0.625473	1.68393e-79	0.608
cycling SCPs	FANCA	0.574605	3.1667e-79	0.601
cycling SCPs	CDC14A	0.62938	3.22627e-79	0.597
cycling SCPs	B4GALT6	0.553209	6.73864e-79	0.441
cycling SCPs	ATAD2	0.718691	7.71805e-79	0.639
cycling SCPs	GAS7	0.77913	1.13109e-78	0.865
cycling SCPs	CENPJ	0.581162	1.25206e-78	0.583
cycling SCPs	ITGB3BP	0.658116	1.52457e-78	0.674
cycling SCPs	APOLD1	1.23474	1.70893e-78	0.531
cycling SCPs	NUDT4	0.641755	4.97775e-78	0.587
cycling SCPs	WLS	0.578905	4.97937e-78	0.507
cycling SCPs	ZNF536	0.847164	7.57071e-78	0.969
cycling SCPs	LMNB1	0.563079	1.64008e-77	0.51
cycling SCPs	CDK1	0.558131	1.82953e-77	0.392
cycling SCPs	CCDC18	0.755219	2.80491e-77	0.573
cycling SCPs	DLGAP1	1.03069	3.63499e-75	0.976
cycling SCPs	PTPN14	0.60251	3.74731e-75	0.556
cycling SCPs	TMPO	0.770212	4.12624e-75	0.701
cycling SCPs	OLFML2A	0.599501	4.29547e-75	0.458
cycling SCPs	SEMA3C	0.717389	8.29999e-75	0.524
cycling SCPs	VRK1	0.613088	9.37723e-75	0.51
cycling SCPs	WDHD1	0.507084	2.18698e-74	0.458
cycling SCPs	PRKCA	0.8484	5.30474e-74	0.889
cycling SCPs	DAAM2	0.563899	8.77223e-74	0.51
cycling SCPs	SRGAP2	0.781976	1.48727e-73	0.819
cycling SCPs	CHST9	0.628674	1.63179e-73	0.403
cycling SCPs	CTD-3088G3.8	0.784371	2.43052e-73	0.372
cycling SCPs	PRC1	0.662224	4.46977e-73	0.538
cycling SCPs	NCAPG2	0.506162	6.20479e-73	0.503
cycling SCPs	DNAJC1	0.757968	8.79013e-73	0.84
cycling SCPs	EPB41L2	0.689123	1.10866e-72	0.747
cycling SCPs	MTBP	0.534346	6.63742e-72	0.49
cycling SCPs	PRELID2	0.68801	1.12867e-71	0.552
cycling SCPs	CHST11	0.791994	3.45597e-71	0.649
cycling SCPs	KCNIP1	0.663971	4.92131e-71	0.486
cycling SCPs	LHFPL2	0.636321	2.72276e-70	0.656
cycling SCPs	LINC00478	0.810222	6.59487e-70	0.882
cycling SCPs	ST5	0.581894	7.24759e-69	0.587
cycling SCPs	CDK5RAP2	0.790461	2.3707e-68	0.778
cycling SCPs	GAB1	0.729561	2.53089e-68	0.833
cycling SCPs	PRICKLE2	0.893087	2.5852e-68	0.847
cycling SCPs	BCHE	0.564975	4.39526e-67	0.597
cycling SCPs	ITGA2	0.502139	9.43499e-67	0.361
cycling SCPs	FGD4	0.680579	1.03744e-66	0.792
cycling SCPs	ENC1	0.52882	1.35618e-66	0.344
cycling SCPs	FOXO1	0.737911	1.51624e-65	0.764
cycling SCPs	ZNF521	0.710921	1.87275e-65	0.736
cycling SCPs	AFF2	0.562273	2.67104e-65	0.528
cycling SCPs	RAI14	0.580706	2.74333e-65	0.542
cycling SCPs	ST6GALNAC3	0.775767	5.12329e-65	0.812
cycling SCPs	VCL	0.665551	7.1079e-65	0.608
cycling SCPs	AC011043.1	0.763059	1.03481e-64	0.878
cycling SCPs	RBPMS	0.634893	6.19758e-64	0.677
cycling SCPs	PPAP2A	0.71589	7.05216e-64	0.757
cycling SCPs	FBN1	0.520597	8.53286e-64	0.562
cycling SCPs	XRCC4	0.526951	9.41358e-64	0.483
cycling SCPs	PALLD	0.765626	3.44539e-63	0.781
cycling SCPs	ITGAV	0.531012	3.76124e-63	0.601
cycling SCPs	RGL1	0.553505	2.98329e-62	0.573
cycling SCPs	TMTC2	0.947653	6.05395e-62	0.847
cycling SCPs	RTTN	0.558992	8.08524e-62	0.531
cycling SCPs	CEP135	0.562351	9.5933e-62	0.583
cycling SCPs	SUCLG2	0.557081	1.03717e-61	0.59
cycling SCPs	GPC6	0.724095	1.61034e-61	0.993
cycling SCPs	WIPF1	0.54709	2.49924e-61	0.493
cycling SCPs	MAP3K1	0.714129	7.15866e-61	0.733
cycling SCPs	LIMA1	0.539261	1.37349e-60	0.569
cycling SCPs	PEAK1	0.698924	1.76217e-60	0.771
cycling SCPs	HS3ST4	0.858757	1.96889e-60	0.771
cycling SCPs	MAP4K4	0.723216	2.18184e-60	0.938
cycling SCPs	ZNF730	0.576726	2.72005e-60	0.517
cycling SCPs	E2F3	0.595134	3.57792e-60	0.486
cycling SCPs	OXR1	0.732861	1.35807e-59	0.75
cycling SCPs	LPP	0.777417	1.58475e-59	0.906
cycling SCPs	SIPA1L1	0.779711	6.76651e-59	0.84
cycling SCPs	ITGA1	0.769995	8.68302e-59	0.84
cycling SCPs	NR6A1	0.765748	7.16888e-58	0.826
cycling SCPs	SORCS1	0.697618	8.1196e-58	0.91
cycling SCPs	DDAH1	0.527433	1.14494e-57	0.51
cycling SCPs	SDK2	0.538858	1.47622e-57	0.628
cycling SCPs	ROR1	0.701069	2.69483e-57	0.83
cycling SCPs	SCLT1	0.879152	2.74806e-57	0.882
cycling SCPs	COL4A2	0.599223	3.58904e-57	0.663
cycling SCPs	OSBPL1A	0.548274	5.67732e-57	0.615
cycling SCPs	HUNK	0.574954	9.07678e-57	0.559
cycling SCPs	TNIK	0.74412	1.58944e-56	0.826
cycling SCPs	EFCAB11	0.518013	1.65351e-56	0.42
cycling SCPs	G2E3	0.680077	2.37853e-56	0.58
cycling SCPs	MICAL3	0.703009	2.63554e-56	0.788
cycling SCPs	CKAP2	0.626319	3.08067e-56	0.427
cycling SCPs	GULP1	0.712163	4.30692e-56	0.892
cycling SCPs	RBMS3	0.543823	4.88218e-56	1
cycling SCPs	ITGA6	0.537814	5.04908e-56	0.406
cycling SCPs	LSAMP	0.626483	1.41186e-55	0.993
cycling SCPs	SYNE2	0.610245	2.11171e-55	0.84
cycling SCPs	RFC3	0.642441	3.53916e-55	0.837
cycling SCPs	RBL1	0.50077	5.57169e-55	0.562
cycling SCPs	OAF	0.507382	5.33204e-54	0.462
cycling SCPs	PHLPP1	0.621044	6.17376e-54	0.75
cycling SCPs	DST	0.630807	1.37875e-53	0.993
cycling SCPs	MIR503HG	0.55178	3.84142e-53	0.531
cycling SCPs	PTPN13	0.606167	4.14216e-53	0.545
cycling SCPs	MEGF9	0.592229	2.07793e-52	0.726
cycling SCPs	FRAS1	0.578555	3.27203e-52	0.698
cycling SCPs	HELLS	0.730432	3.68169e-52	0.729
cycling SCPs	LAMA4	0.675124	1.01697e-51	0.705
cycling SCPs	RP11-222A11.1	0.584011	1.02131e-51	0.476
cycling SCPs	AQP4-AS1	0.505817	1.16161e-51	0.396
cycling SCPs	TBX2	0.72155	2.43596e-51	0.712
cycling SCPs	FAM13A	0.590216	3.46655e-51	0.649
cycling SCPs	PDZRN3	0.753497	5.29318e-51	0.858
cycling SCPs	CENPP	0.685441	6.96285e-51	0.792
cycling SCPs	TCF7L2	0.607934	1.79918e-50	0.854
cycling SCPs	CYP7B1	0.50257	5.69696e-49	0.438
cycling SCPs	C4orf21	0.534526	6.27893e-49	0.486
cycling SCPs	ERBB2IP	0.61909	7.43595e-49	0.851
cycling SCPs	POLA1	0.647927	1.56749e-48	0.628
cycling SCPs	IL1RAP	0.55913	1.69186e-48	0.337
cycling SCPs	CHD7	0.626449	1.96236e-48	0.878
cycling SCPs	SKA2	0.552199	2.55689e-48	0.576
cycling SCPs	RALGPS2	0.583448	2.76965e-48	0.778
cycling SCPs	LRCH1	0.626067	2.9398e-48	0.729
cycling SCPs	FRMD4A	0.636203	3.29235e-48	0.958
cycling SCPs	PKD2	0.559859	1.02271e-47	0.781
cycling SCPs	CTDSPL	0.611119	5.62111e-47	0.604
cycling SCPs	CEP192	0.564106	4.84529e-46	0.733
cycling SCPs	BICC1	0.59691	5.21316e-46	0.639
cycling SCPs	CNTLN	0.542887	6.19973e-46	0.764
cycling SCPs	FBXL7	0.574511	7.24753e-46	0.979
cycling SCPs	RP11-308N19.1	0.903497	1.11261e-45	0.333
cycling SCPs	DGKH	0.52639	2.1174e-45	0.542
cycling SCPs	SYNPR	0.579543	2.33504e-45	0.34
cycling SCPs	GPC3	0.778939	2.80035e-45	0.656
cycling SCPs	LMCD1-AS1	0.624349	4.65553e-45	0.774
cycling SCPs	PKP4	0.520916	4.8511e-45	0.615
cycling SCPs	GTDC1	0.661314	1.05042e-44	0.812
cycling SCPs	HP1BP3	0.694262	2.21799e-44	0.816
cycling SCPs	MIR4435-1HG	0.581722	1.28534e-43	0.295
cycling SCPs	ARNT2	0.511451	2.7448e-43	0.569
cycling SCPs	SIPA1L2	0.501765	4.95849e-43	0.535
cycling SCPs	MMP17	0.651024	5.67794e-43	0.663
cycling SCPs	CTNNA3	0.663937	1.27759e-42	0.677
cycling SCPs	TRAF3IP2-AS1	0.562667	1.90206e-42	0.809
cycling SCPs	KIAA0922	0.524351	1.956e-42	0.674
cycling SCPs	COL18A1	0.609591	1.61495e-41	0.715
cycling SCPs	FREM1	0.696481	2.36344e-41	0.545
cycling SCPs	EFNB2	0.596915	4.36934e-41	0.573
cycling SCPs	ID3	0.532364	4.90489e-41	0.594
cycling SCPs	FAM3C	0.500412	4.9981e-41	0.59
cycling SCPs	C10orf11	0.571221	6.84915e-41	0.59
cycling SCPs	RAP1GDS1	0.51756	1.16295e-40	0.747
cycling SCPs	XKR4	0.761594	4.01421e-40	0.622
cycling SCPs	PTPN12	0.539176	1.07033e-39	0.799
cycling SCPs	PACSIN2	0.517082	3.36253e-39	0.656
cycling SCPs	PRICKLE1	0.574299	5.69594e-39	0.497
cycling SCPs	CEP70	0.531103	7.22071e-39	0.424
cycling SCPs	NUCKS1	0.569021	1.30028e-38	0.743
cycling SCPs	SPATA6	0.522631	2.13729e-38	0.656
cycling SCPs	ANKRD44	0.606188	3.11854e-38	0.819
cycling SCPs	CKAP5	0.608367	9.82932e-38	0.625
cycling SCPs	WHSC1	0.546043	2.6761e-37	0.847
cycling SCPs	CCDC14	0.521315	2.37649e-36	0.767
cycling SCPs	PDE4D	0.61629	2.56687e-36	0.747
cycling SCPs	ARHGEF12	0.506983	3.56576e-36	0.816
cycling SCPs	USP53	0.623348	4.59884e-36	0.361
cycling SCPs	LGR4	0.58487	2.24558e-35	0.549
cycling SCPs	SH3D19	0.530946	4.18635e-34	0.594
cycling SCPs	MVB12B	0.501294	1.1014e-33	0.767
cycling SCPs	PTN	0.505511	1.65098e-32	0.521
cycling SCPs	DNAH14	0.551183	1.04952e-31	0.747
cycling SCPs	GRIK2	0.523645	1.34954e-31	0.976
cycling SCPs	GPSM2	0.502006	1.55051e-31	0.455
cycling SCPs	WDPCP	0.571744	2.63894e-31	0.778
cycling SCPs	KHDRBS2	0.669643	2.27574e-30	0.462
cycling SCPs	MED12L	0.526666	2.88642e-30	0.667
cycling SCPs	NRIP1	0.524203	4.71249e-30	0.67
cycling SCPs	AFF3	0.52233	5.04374e-30	0.792
cycling SCPs	RP11-141M1.3	0.526109	2.10336e-29	0.413
cycling SCPs	RP11-444D3.1	0.508649	2.80987e-29	0.781
cycling SCPs	NPAS3	0.51502	3.06163e-28	0.663
cycling SCPs	INPP4B	0.630752	3.41635e-28	0.517
cycling SCPs	PCDH7	0.604019	2.23128e-27	0.854
cycling SCPs	SVIL	0.558746	2.41462e-26	0.681
cycling SCPs	GPR98	0.576745	9.27428e-26	0.438
cycling SCPs	MMP16	0.622683	2.83827e-25	0.774
cycling SCPs	NLGN4X	0.514829	1.05322e-21	0.854
cycling SCPs	LRRC7	0.511577	1.5381e-16	0.486

## Sheet: Dong 2020 1
Table S6: This table contains 1283 signature genes for 9 developing cell types, Related to Figure 5B.
Cell type	Gene
SCPs	S100B
SCPs	CRYAB
SCPs	STAR
SCPs	ALDH1A1
SCPs	NOV
SCPs	MT3
SCPs	RGCC
SCPs	FXYD1
SCPs	INHA
SCPs	OLFML2A
SCPs	TMEM176A
SCPs	MGARP
SCPs	TMEM176B
SCPs	ABCA8
SCPs	RNASE1
SCPs	CYP11A1
SCPs	LGALS1
SCPs	CYP21A2
SCPs	FAM166B
SCPs	MEF2C
SCPs	APOE
SCPs	DLK1
SCPs	HSPB2
SCPs	LGI4
SCPs	B2M
SCPs	IGF2
SCPs	SPARC
SCPs	MPZ
SCPs	SULT2A1
SCPs	ZFP36
SCPs	IFITM3
SCPs	ITGA1
SCPs	ALDOA
SCPs	IFI16
SCPs	COL15A1
SCPs	HBG2
SCPs	HSPB6
SCPs	ARPC1B
SCPs	FDX1
SCPs	MYL9
SCPs	COL1A1
SCPs	PMP22
SCPs	IGFBP7
SCPs	ARHGAP15
SCPs	PLAT
SCPs	PLP1
SCPs	APOC1
SCPs	FDXR
SCPs	BST2
SCPs	HBA2
SCPs	MT2A
SCPs	HBA1
SCPs	TCEA3
SCPs	SH3BP5
SCPs	CD63
SCPs	NDRG2
SCPs	TNNI3
SCPs	LAPTM4A
SCPs	TIMP3
SCPs	TOMM7
SCPs	PLAC9
SCPs	IFITM2
SCPs	COL1A2
SCPs	EMP3
SCPs	LY6E
SCPs	C6orf48
SCPs	RHOC
SCPs	CDH19
SCPs	SCARB1
SCPs	MT1E
SCPs	S100A10
SCPs	ANXA2
SCPs	NFIA
SCPs	OAF
SCPs	SCRG1
SCPs	PSME1
SCPs	TBX3
SCPs	ITM2B
SCPs	GSN
SCPs	S100A6
SCPs	FCGRT
SCPs	NRXN1
SCPs	PLP2
SCPs	PEG10
SCPs	NDUFA11
SCPs	HLA-A
SCPs	SNHG25
SCPs	NID1
SCPs	HSPB1
SCPs	LAMA4
SCPs	TSC22D4
SCPs	TBCA
SCPs	AAMDC
SCPs	MGST2
SCPs	COL4A1
SCPs	SOAT1
SCPs	NBEAL1
SCPs	UQCRQ
SCPs	GNG11
SCPs	APOA1
SCPs	ZFP36L1
SCPs	GSTK1
SCPs	S100A16
SCPs	TSPO
SCPs	DAB2
SCPs	CYB5B
SCPs	NUDT4
SCPs	TIMP1
SCPs	WWTR1
SCPs	SERPINB6
SCPs	NPC2
SCPs	SLC15A3
SCPs	POR
SCPs	SLC25A6
SCPs	BCHE
SCPs	EIF3E
SCPs	MAPRE2
SCPs	SOX10
SCPs	CD9
SCPs	LAMC1
SCPs	HBB
SCPs	PNRC1
SCPs	TPM2
SCPs	FOXD3-AS1
SCPs	COMT
SCPs	IGFBP4
SCPs	POSTN
SCPs	LMNA
SCPs	ERBB3
SCPs	CD59
SCPs	TFAP2A
SCPs	CCND3
SCPs	CEBPB
SCPs	HBG1
SCPs	PPP2R1A
SCPs	DHCR24
SCPs	PHLDA1
SCPs	CNPY2
SCPs	CREM
SCPs	NR4A1
SCPs	JUNB
SCPs	KLHDC8B
SCPs	CNP
SCPs	APP
SCPs	CTNNAL1
SCPs	RDX
SCPs	C11orf96
SCPs	COX7A1
SCPs	MOXD1
SCPs	PTS
SCPs	ERGIC3
SCPs	PLPP1
SCPs	GLIPR2
SCPs	NDN
SCPs	TSC22D3
SCPs	SIAH2
SCPs	TAX1BP3
SCPs	GSTA4
SCPs	ID2
SCPs	RAB38
SCPs	EMP2
SCPs	SORBS2
SCPs	UQCR11
SCPs	ARL5A
SCPs	PSAP
SCPs	SERPINH1
SCPs	HSPE1
SCPs	TXNIP
SCPs	MRPL33
SCPs	HES1
SCPs	TSPAN7
SCPs	ECH1
SCPs	TCEAL8
SCPs	SCPEP1
SCPs	COL5A2
SCPs	DST
SCPs	NKAIN4
SCPs	SAT1
SCPs	FKBP1A
SCPs	RHOB
SCPs	TLN1
SCPs	LIMA1
SCPs	VAPA
SCPs	ST3GAL4
SCPs	BTG2
SCPs	UGCG
SCPs	PRKAR1A
SCPs	CD164
SCPs	ITM2C
SCPs	DLC1
SCPs	GLRX
SCPs	GPM6B
SCPs	CALD1
SCPs	TMEM14A
SCPs	CRTAP
SCPs	MRPL24
SCPs	CIB1
SCPs	SYNGR1
SCPs	SPTBN1
SCPs	SCP2
SCPs	MCAM
SCPs	SQSTM1
SCPs	HADHB
SCPs	NFE2L2
SCPs	COX17
SCPs	FAM3C
SCPs	RGS2
SCPs	OAZ2
SCPs	IGFBP5
SCPs	EDNRB
SCPs	HLA-C
SCPs	ACADVL
SCPs	OXA1L
SCPs	POLR2G
SCPs	RAB7A
SCPs	IMPDH2
SCPs	ZFP36L2
SCPs	TMED2
SCPs	MOB4
SCPs	ANXA5
SCPs	SDCBP
SCPs	SDHC
SCPs	DNAJC1
SCPs	EIF5B
SCPs	PELO
SCPs	ECI2
SCPs	SYPL1
SCPs	ATF4
SCPs	H2AFJ
SCPs	PEG3
SCPs	FOSB
SCPs	RUVBL2
SCPs	PTP4A1
SCPs	SYAP1
SCPs	CTNNB1
SCPs	KLF6
SCPs	HLA-B
SCPs	COX14
SCPs	ATP1B3
SCPs	SERTAD1

## Sheet: Dong 2020 2
Table S8: This table contains 1479 signature genes for 10 cell type/states, Related to Figure 6A
Cell type	Gene
SCPs	S100B
SCPs	CRYAB
SCPs	STAR
SCPs	ALDH1A1
SCPs	NOV
SCPs	MT3
SCPs	RGCC
SCPs	FXYD1
SCPs	INHA
SCPs	OLFML2A
SCPs	TMEM176A
SCPs	MGARP
SCPs	TMEM176B
SCPs	ABCA8
SCPs	RNASE1
SCPs	CYP11A1
SCPs	LGALS1
SCPs	CYP21A2
SCPs	FAM166B
SCPs	MEF2C
SCPs	APOE
SCPs	DLK1
SCPs	HSPB2
SCPs	LGI4
SCPs	B2M
SCPs	IGF2
SCPs	SPARC
SCPs	MPZ
SCPs	SULT2A1
SCPs	ZFP36
SCPs	IFITM3
SCPs	ITGA1
SCPs	ALDOA
SCPs	IFI16
SCPs	COL15A1
SCPs	HBG2
SCPs	HSPB6
SCPs	ARPC1B
SCPs	FDX1
SCPs	MYL9
SCPs	COL1A1
SCPs	PMP22
SCPs	IGFBP7
SCPs	ARHGAP15
SCPs	PLAT
SCPs	PLP1
SCPs	APOC1
SCPs	FDXR
SCPs	BST2
SCPs	HBA2
SCPs	MT2A
SCPs	HBA1
SCPs	TCEA3
SCPs	SH3BP5
SCPs	CD63
SCPs	NDRG2
SCPs	TNNI3
SCPs	LAPTM4A
SCPs	TIMP3
SCPs	TOMM7
SCPs	PLAC9
SCPs	IFITM2
SCPs	COL1A2
SCPs	EMP3
SCPs	LY6E
SCPs	C6orf48
SCPs	RHOC
SCPs	CDH19
SCPs	SCARB1
SCPs	MT1E
SCPs	S100A10
SCPs	ANXA2
SCPs	NFIA
SCPs	OAF
SCPs	SCRG1
SCPs	PSME1
SCPs	TBX3
SCPs	ITM2B
SCPs	GSN
SCPs	S100A6
SCPs	FCGRT
SCPs	NRXN1
SCPs	PLP2
SCPs	PEG10
SCPs	NDUFA11
SCPs	HLA-A
SCPs	SNHG25
SCPs	NID1
SCPs	HSPB1
SCPs	LAMA4
SCPs	TSC22D4
SCPs	TBCA
SCPs	AAMDC
SCPs	MGST2
SCPs	COL4A1
SCPs	SOAT1
SCPs	NBEAL1
SCPs	UQCRQ
SCPs	GNG11
SCPs	APOA1
SCPs	ZFP36L1
SCPs	GSTK1
SCPs	S100A16
SCPs	TSPO
SCPs	DAB2
SCPs	CYB5B
SCPs	NUDT4
SCPs	TIMP1
SCPs	WWTR1
SCPs	SERPINB6
SCPs	NPC2
SCPs	SLC15A3
SCPs	POR
SCPs	SLC25A6
SCPs	BCHE
SCPs	EIF3E
SCPs	MAPRE2
SCPs	SOX10
SCPs	CD9
SCPs	LAMC1
SCPs	HBB
SCPs	PNRC1
SCPs	TPM2
SCPs	FOXD3-AS1
SCPs	COMT
SCPs	IGFBP4
SCPs	POSTN
SCPs	LMNA
SCPs	ERBB3
SCPs	CD59
SCPs	TFAP2A
SCPs	CCND3
SCPs	CEBPB
SCPs	HBG1
SCPs	PPP2R1A
SCPs	DHCR24
SCPs	PHLDA1
SCPs	CNPY2
SCPs	CREM
SCPs	NR4A1
SCPs	JUNB
SCPs	KLHDC8B
SCPs	CNP
SCPs	APP
SCPs	CTNNAL1
SCPs	RDX
SCPs	C11orf96
SCPs	COX7A1
SCPs	MOXD1
SCPs	PTS
SCPs	ERGIC3
SCPs	PLPP1
SCPs	GLIPR2
SCPs	NDN
SCPs	TSC22D3
SCPs	SIAH2
SCPs	TAX1BP3
SCPs	GSTA4
SCPs	ID2
SCPs	RAB38
SCPs	EMP2
SCPs	SORBS2
SCPs	UQCR11
SCPs	ARL5A
SCPs	PSAP
SCPs	SERPINH1
SCPs	HSPE1
SCPs	TXNIP
SCPs	MRPL33
SCPs	HES1
SCPs	TSPAN7
SCPs	ECH1
SCPs	TCEAL8
SCPs	SCPEP1
SCPs	COL5A2
SCPs	DST
SCPs	NKAIN4
SCPs	SAT1
SCPs	FKBP1A
SCPs	RHOB
SCPs	TLN1
SCPs	LIMA1
SCPs	VAPA
SCPs	ST3GAL4
SCPs	BTG2
SCPs	UGCG
SCPs	PRKAR1A
SCPs	CD164
SCPs	ITM2C
SCPs	DLC1
SCPs	GLRX
SCPs	GPM6B
SCPs	CALD1
SCPs	TMEM14A
SCPs	CRTAP
SCPs	MRPL24
SCPs	CIB1
SCPs	SYNGR1
SCPs	SPTBN1
SCPs	SCP2
SCPs	MCAM
SCPs	SQSTM1
SCPs	HADHB
SCPs	NFE2L2
SCPs	COX17
SCPs	FAM3C
SCPs	RGS2
SCPs	OAZ2
SCPs	IGFBP5
SCPs	EDNRB
SCPs	HLA-C
SCPs	ACADVL
SCPs	OXA1L
SCPs	POLR2G
SCPs	RAB7A
SCPs	IMPDH2
SCPs	ZFP36L2
SCPs	TMED2
SCPs	MOB4
SCPs	ANXA5
SCPs	SDCBP
SCPs	SDHC
SCPs	DNAJC1
SCPs	EIF5B
SCPs	PELO
SCPs	ECI2
SCPs	SYPL1
SCPs	ATF4
SCPs	H2AFJ
SCPs	PEG3
SCPs	FOSB
SCPs	RUVBL2
SCPs	PTP4A1
SCPs	SYAP1
SCPs	CTNNB1
SCPs	KLF6
SCPs	HLA-B
SCPs	COX14
SCPs	ATP1B3
SCPs	SERTAD1

## Sheet: Dong 2020 3
Table S4: The table shows in total 2612 differentially expressed genes of identified 5 cell types/states in sympathoadrenal lineage cells.
Gene	p_val	avg_logFC	pct.1	pct.2	p_val_adj	Cell_type
S100B	0	2.47647	0.873	0.143	0	SCPs
PLP1	0	2.01052	0.728	0.024	0	SCPs
MPZ	0	1.74811	0.624	0.027	0	SCPs
FXYD1	2.39496e-293	1.56042	0.604	0.031	3.92461e-289	SCPs
CRYAB	8.1835e-291	2.16722	0.757	0.096	1.34103e-286	SCPs
OLFML2A	5.61158e-243	1.31355	0.443	0.01	9.19569e-239	SCPs
ALDH1A1	1.55899e-235	1.72551	0.535	0.036	2.55472e-231	SCPs
GPM6B	1.31102e-228	1.37924	0.535	0.04	2.14837e-224	SCPs
TMEM176A	4.94026e-220	1.25336	0.469	0.024	8.09561e-216	SCPs
LGI4	2.52947e-217	1.12046	0.437	0.017	4.14505e-213	SCPs
TTYH1	5.02119e-211	1.30335	0.414	0.014	8.22823e-207	SCPs
ZFP36L1	1.7888e-206	1.57198	0.779	0.182	2.93131e-202	SCPs
TMEM176B	4.90879e-197	1.14646	0.447	0.027	8.04404e-193	SCPs
RGCC	1.20952e-185	1.66581	0.612	0.099	1.98205e-181	SCPs
CYR61	6.40514e-183	1.80506	0.449	0.036	1.04961e-178	SCPs
PLAT	7.59388e-180	1.51871	0.503	0.056	1.24441e-175	SCPs
IFITM3	2.88477e-176	1.40451	0.831	0.257	4.72727e-172	SCPs
SPARC	9.72593e-174	1.42304	0.877	0.322	1.59379e-169	SCPs
COL5A2	8.665e-165	0.975892	0.384	0.024	1.41993e-160	SCPs
SCRG1	1.83808e-161	1.55412	0.475	0.059	3.01206e-157	SCPs
EDNRB	1.63789e-160	1.11056	0.423	0.038	2.68401e-156	SCPs
HES1	3.6252e-154	1.50667	0.642	0.139	5.94061e-150	SCPs
LGALS1	4.51663e-152	1.98258	0.775	0.286	7.4014e-148	SCPs
MEF2C	2.66101e-151	1.25333	0.592	0.112	4.3606e-147	SCPs
NKAIN4	3.00766e-149	1.00825	0.384	0.031	4.92866e-145	SCPs
FOXD3-AS1	4.91539e-149	0.974554	0.318	0.015	8.05485e-145	SCPs
ARHGAP15	3.11133e-141	0.855311	0.276	0.008	5.09854e-137	SCPs
SLC15A3	2.92219e-140	0.705338	0.272	0.008	4.78859e-136	SCPs
SOX10	1.449e-139	0.753187	0.284	0.01	2.37448e-135	SCPs
ERBB3	2.70863e-139	0.909315	0.326	0.021	4.43864e-135	SCPs
CDH19	4.27893e-135	0.715741	0.26	0.007	7.01189e-131	SCPs
PTPRZ1	3.24585e-134	0.835161	0.302	0.016	5.31897e-130	SCPs
MIA	1.01875e-132	0.928029	0.237	0.003	1.66942e-128	SCPs
TFAP2A	5.21143e-132	0.790339	0.262	0.008	8.53997e-128	SCPs
S100A10	6.70458e-132	1.20039	0.736	0.23	1.09868e-127	SCPs
COL1A2	1.51267e-127	1.12562	0.533	0.11	2.4788e-123	SCPs
ARPC1B	3.61907e-125	1.19367	0.557	0.132	5.93057e-121	SCPs
ABCA8	8.05808e-122	0.660398	0.262	0.012	1.32048e-117	SCPs
CRABP1	1.20847e-120	1.09355	0.346	0.036	1.98032e-116	SCPs
MOXD1	1.21239e-119	0.957884	0.378	0.047	1.98674e-115	SCPs
COL4A1	3.85542e-118	0.880459	0.346	0.036	6.31788e-114	SCPs
INSC	7.16201e-118	0.620187	0.227	0.006	1.17364e-113	SCPs
COL1A1	2.92224e-117	1.13241	0.537	0.126	4.78867e-113	SCPs
EMP2	4.40313e-117	1.00092	0.459	0.082	7.21541e-113	SCPs
SOX2	2.20737e-116	0.766978	0.284	0.02	3.61722e-112	SCPs
PLAC9	1.41152e-114	0.969621	0.376	0.049	2.31305e-110	SCPs
TIMP3	5.0922e-114	1.17272	0.744	0.305	8.34459e-110	SCPs
POSTN	5.48795e-114	0.918621	0.34	0.036	8.9931e-110	SCPs
VCAN	1.59628e-113	1.06452	0.453	0.083	2.61583e-109	SCPs
SERPINH1	9.95898e-112	1.07043	0.553	0.145	1.63198e-107	SCPs
TRPM3	3.73837e-108	0.667063	0.235	0.011	6.12607e-104	SCPs
ZEB2	1.96873e-104	0.930051	0.473	0.103	3.22615e-100	SCPs
CTGF	2.7018e-102	1.34365	0.314	0.037	4.42743e-98	SCPs
COL9A3	7.94587e-101	0.645855	0.221	0.01	1.30209e-96	SCPs
LMO4	1.38053e-100	0.986614	0.41	0.079	2.26227e-96	SCPs
NID1	2.70933e-99	0.69265	0.284	0.027	4.43978e-95	SCPs
NR2F2	4.73827e-95	0.872043	0.368	0.061	7.76461e-91	SCPs
LAMP5	1.00316e-94	0.577076	0.195	0.007	1.64388e-90	SCPs
FOXD3	1.6503e-94	0.487635	0.181	0.004	2.70435e-90	SCPs
IFITM2	2.52802e-94	0.936306	0.449	0.101	4.14266e-90	SCPs
TPM2	7.63941e-94	0.911319	0.75	0.338	1.25187e-89	SCPs
CNN3	1.08193e-92	1.06233	0.744	0.406	1.77296e-88	SCPs
VIM	1.09876e-92	1.1804	0.948	0.742	1.80054e-88	SCPs
SLC35F1	2.03874e-92	0.66618	0.239	0.018	3.34088e-88	SCPs
CDH6	2.51747e-92	0.735819	0.247	0.021	4.12538e-88	SCPs
SEMA3B	2.96322e-91	0.673998	0.237	0.018	4.85583e-87	SCPs
ID3	4.12052e-89	1.44635	0.763	0.441	6.75229e-85	SCPs
PLEKHA4	5.33959e-88	0.628939	0.209	0.012	8.74998e-84	SCPs
COL4A2	6.69054e-88	0.8513	0.388	0.078	1.09638e-83	SCPs
EEF1D	6.72307e-87	0.700732	0.948	0.764	1.10171e-82	SCPs
METRN	3.46848e-85	0.98384	0.537	0.177	5.6838e-81	SCPs
GSN	1.48432e-84	0.8485	0.394	0.084	2.43236e-80	SCPs
ADGRG6	7.85946e-84	0.429999	0.167	0.005	1.28793e-79	SCPs
WWTR1	9.10069e-84	0.701115	0.296	0.041	1.49133e-79	SCPs
CALD1	1.0548e-82	0.948686	0.646	0.279	1.7285e-78	SCPs
HSPB2	6.50602e-82	0.911588	0.294	0.044	1.06614e-77	SCPs
CD99	3.01681e-81	0.97747	0.646	0.294	4.94365e-77	SCPs
IFI16	1.85709e-78	0.709987	0.284	0.041	3.04321e-74	SCPs
RNASE1	1.9315e-78	0.878601	0.354	0.07	3.16515e-74	SCPs
KCTD12	2.50461e-78	0.599585	0.237	0.025	4.10431e-74	SCPs
COL2A1	2.82985e-76	0.81847	0.292	0.047	4.63727e-72	SCPs
CD63	6.50898e-76	0.613176	0.98	0.833	1.06663e-71	SCPs
PLS3	5.62398e-74	0.596174	0.26	0.035	9.21602e-70	SCPs
LIMA1	1.23313e-73	0.734083	0.322	0.061	2.02073e-69	SCPs
MDFI	1.39156e-73	0.489757	0.199	0.016	2.28035e-69	SCPs
LPL	1.01262e-72	0.708369	0.217	0.023	1.65938e-68	SCPs
GAS7	1.63985e-72	0.603255	0.249	0.033	2.68722e-68	SCPs
CMTM5	2.74661e-72	0.529046	0.205	0.019	4.50086e-68	SCPs
OAF	8.87465e-71	0.724911	0.386	0.093	1.45429e-66	SCPs
RASSF4	2.17359e-70	0.533319	0.195	0.017	3.56187e-66	SCPs
RHOB	1.27014e-69	0.924758	0.763	0.478	2.08138e-65	SCPs
NDRG2	4.1994e-69	0.852876	0.425	0.122	6.88155e-65	SCPs
COL18A1	5.58239e-69	0.7725	0.308	0.061	9.14786e-65	SCPs
RARRES2	1.94202e-68	0.805035	0.467	0.137	3.18238e-64	SCPs
RHOC	2.89285e-68	0.919573	0.668	0.36	4.74051e-64	SCPs
SLITRK2	5.49697e-68	0.52597	0.151	0.007	9.00788e-64	SCPs
HMGA2	5.52645e-68	0.641623	0.264	0.043	9.0562e-64	SCPs
PMP2	1.08762e-66	0.397929	0.117	0.001	1.78228e-62	SCPs
NPR3	4.09681e-66	0.666137	0.31	0.062	6.71345e-62	SCPs
EMP3	1.97597e-65	0.824133	0.457	0.148	3.23802e-61	SCPs
FABP7	2.45415e-65	0.7646	0.159	0.01	4.02162e-61	SCPs
CDC42EP5	6.33495e-65	0.470751	0.165	0.012	1.03811e-60	SCPs
B2M	6.26931e-64	0.651382	0.968	0.802	1.02735e-59	SCPs
APOE	1.9724e-62	1.10834	0.833	0.638	3.23217e-58	SCPs
MYL12A	6.10883e-62	0.781684	0.68	0.361	1.00105e-57	SCPs
MEGF10	1.70906e-59	0.346035	0.131	0.006	2.80063e-55	SCPs
QKI	4.28119e-59	0.673034	0.328	0.083	7.01559e-55	SCPs
TGFBR2	4.54377e-59	0.500688	0.201	0.025	7.44587e-55	SCPs
IGFBP4	7.75032e-59	0.680904	0.316	0.076	1.27004e-54	SCPs
NOV	2.49081e-58	1.09453	0.507	0.2	4.08169e-54	SCPs
PPFIBP1	3.74917e-58	0.527783	0.237	0.039	6.14376e-54	SCPs
ZFP36	3.87026e-58	0.987526	0.489	0.195	6.34219e-54	SCPs
DNAJC1	9.46181e-58	0.836802	0.41	0.137	1.55051e-53	SCPs
LAMC1	2.1782e-57	0.630589	0.254	0.049	3.56942e-53	SCPs
COL20A1	3.76841e-56	0.42652	0.125	0.006	6.1753e-52	SCPs
S100A11	8.74482e-56	0.778628	0.487	0.185	1.43301e-51	SCPs
LINC01198	1.13329e-55	0.269537	0.103	0.002	1.85712e-51	SCPs
NRXN1	2.44664e-55	0.749746	0.406	0.138	4.00931e-51	SCPs
GFRA1	4.01003e-55	0.373304	0.133	0.008	6.57123e-51	SCPs
ATP1A2	4.23949e-55	0.372046	0.125	0.006	6.94726e-51	SCPs
NFIA	7.22917e-55	0.562906	0.272	0.057	1.18464e-50	SCPs
NOTCH1	1.30023e-53	0.301627	0.121	0.006	2.13069e-49	SCPs
TPBG	4.23831e-53	0.370442	0.133	0.009	6.94532e-49	SCPs
TSPO	3.29694e-52	0.639186	0.338	0.094	5.4027e-48	SCPs
MGARP	4.09798e-52	0.779414	0.435	0.154	6.71535e-48	SCPs
RHOJ	5.22963e-52	0.284906	0.109	0.004	8.56979e-48	SCPs
BDH2	1.25654e-51	0.495261	0.249	0.049	2.05909e-47	SCPs
NKAIN3	1.1423e-50	0.393413	0.177	0.023	1.87188e-46	SCPs
FAM198B	1.51083e-50	0.538293	0.217	0.038	2.4758e-46	SCPs
COMT	2.51864e-49	0.710422	0.638	0.365	4.1273e-45	SCPs
AHR	7.70636e-49	0.327621	0.119	0.008	1.26284e-44	SCPs
FILIP1L	9.88905e-49	0.461532	0.161	0.019	1.62052e-44	SCPs
CTNNAL1	1.18217e-48	0.699701	0.598	0.318	1.93722e-44	SCPs
CDC42EP1	4.46784e-48	0.4592	0.187	0.029	7.32145e-44	SCPs
TOMM7	5.4468e-48	0.452136	0.966	0.874	8.92566e-44	SCPs
DHRS3	6.62677e-48	0.399256	0.139	0.013	1.08593e-43	SCPs
RAB31	1.00447e-47	0.4525	0.201	0.034	1.64603e-43	SCPs
SLITRK6	2.67307e-47	0.390198	0.129	0.011	4.38036e-43	SCPs
PON2	3.78879e-47	0.654811	0.354	0.112	6.20869e-43	SCPs
CNN2	8.47494e-47	0.47508	0.173	0.025	1.38879e-42	SCPs
SERF2	1.36378e-46	0.317452	0.998	0.992	2.23482e-42	SCPs
CNP	1.93619e-46	0.827553	0.453	0.207	3.17284e-42	SCPs
MYL9	2.77684e-46	0.784732	0.499	0.218	4.55041e-42	SCPs
IGFBP2	3.16216e-46	0.897423	0.577	0.334	5.18184e-42	SCPs
BCHE	3.39404e-46	0.651064	0.372	0.125	5.56181e-42	SCPs
MCAM	5.15137e-46	0.594786	0.256	0.062	8.44155e-42	SCPs
MT3	6.71635e-46	0.90236	0.581	0.294	1.10061e-41	SCPs
MAL	1.04005e-45	0.354798	0.105	0.006	1.70433e-41	SCPs
ANXA1	1.77866e-45	0.523527	0.129	0.012	2.91468e-41	SCPs
MGST1	2.08855e-45	0.627075	0.477	0.191	3.42251e-41	SCPs
GSTK1	2.25913e-45	0.671401	0.485	0.221	3.70203e-41	SCPs
HSPE1	4.59572e-45	0.587658	0.984	0.945	7.53101e-41	SCPs
AAMDC	6.47482e-45	0.716404	0.567	0.28	1.06103e-40	SCPs
PDPN	6.66612e-45	0.307662	0.107	0.006	1.09238e-40	SCPs
ID4	9.34814e-45	0.755583	0.278	0.077	1.53188e-40	SCPs
PRKCDBP	1.13314e-44	0.64756	0.318	0.097	1.85688e-40	SCPs
ITGA1	2.33741e-44	0.613431	0.336	0.109	3.83032e-40	SCPs
PRSS23	2.67934e-44	0.413183	0.165	0.024	4.39064e-40	SCPs
MFGE8	1.09721e-43	0.464538	0.179	0.029	1.79799e-39	SCPs
JUN	1.94026e-43	0.610664	0.922	0.8	3.17951e-39	SCPs
NUDT4	3.40573e-43	0.781674	0.423	0.184	5.58097e-39	SCPs
TNS3	3.77225e-43	0.357861	0.141	0.017	6.18159e-39	SCPs
RAB32	1.10998e-42	0.526471	0.256	0.065	1.81893e-38	SCPs
SASH1	1.30353e-42	0.368165	0.135	0.015	2.1361e-38	SCPs
NGFR	1.34393e-42	0.596992	0.231	0.054	2.2023e-38	SCPs
INHA	5.62535e-42	0.816823	0.455	0.199	9.21826e-38	SCPs
HEY2	6.24929e-42	0.302154	0.103	0.007	1.02407e-37	SCPs
HSPB1	8.76611e-42	0.566726	0.918	0.787	1.4365e-37	SCPs
ETS1	1.13477e-41	0.346576	0.123	0.012	1.85955e-37	SCPs
FSTL1	1.67433e-41	0.603143	0.324	0.106	2.74372e-37	SCPs
S100A16	1.92855e-41	0.554786	0.266	0.071	3.16031e-37	SCPs
EPB41L2	2.82843e-41	0.450755	0.215	0.046	4.63495e-37	SCPs
NPC2	3.62105e-41	0.682335	0.475	0.221	5.93381e-37	SCPs
TEAD2	3.8899e-41	0.286335	0.115	0.01	6.37439e-37	SCPs
RAB13	7.86047e-41	0.631064	0.475	0.215	1.2881e-36	SCPs
PDLIM1	8.64373e-41	0.360604	0.127	0.014	1.41645e-36	SCPs
CNPY2	1.12792e-40	0.635444	0.648	0.434	1.84832e-36	SCPs
MYO10	1.36911e-40	0.328831	0.125	0.013	2.24356e-36	SCPs
TSPAN15	1.68134e-40	0.362177	0.139	0.018	2.75521e-36	SCPs
LY6E	2.17294e-40	0.753258	0.724	0.528	3.5608e-36	SCPs
CRTAP	2.47676e-40	0.57508	0.27	0.077	4.05867e-36	SCPs
FRMD6	2.74912e-40	0.328146	0.129	0.015	4.50498e-36	SCPs
ANXA2	4.89865e-40	0.776183	0.803	0.576	8.02742e-36	SCPs
WLS	5.5268e-40	0.434098	0.203	0.042	9.05677e-36	SCPs
ITM2B	1.49122e-39	0.522835	0.863	0.714	2.44366e-35	SCPs
ZCCHC24	3.60589e-39	0.262608	0.101	0.008	5.90897e-35	SCPs
TGIF1	9.43864e-39	0.440214	0.215	0.049	1.54671e-34	SCPs
SAT1	1.75932e-38	0.802279	0.487	0.251	2.883e-34	SCPs
HOXB9	2.1547e-38	0.33152	0.135	0.018	3.5309e-34	SCPs
FDXR	2.91696e-38	0.707863	0.497	0.245	4.78003e-34	SCPs
CRISPLD1	2.96198e-38	0.374654	0.135	0.018	4.8538e-34	SCPs
BACE2	3.85858e-38	0.273643	0.105	0.009	6.32305e-34	SCPs
CD82	3.97027e-38	0.317517	0.101	0.008	6.50608e-34	SCPs
AFAP1L2	4.16203e-38	0.288844	0.109	0.01	6.82032e-34	SCPs
LAPTM4A	8.48044e-38	0.527802	0.859	0.721	1.38969e-33	SCPs
TNNI3	1.20197e-37	0.808834	0.378	0.149	1.96966e-33	SCPs
PLIN3	1.74574e-37	0.537987	0.306	0.1	2.86075e-33	SCPs
FBN2	1.82291e-37	0.396054	0.171	0.031	2.9872e-33	SCPs
HLA-A	2.04325e-37	0.587695	0.569	0.306	3.34827e-33	SCPs
FLNA	2.33873e-37	0.474607	0.191	0.041	3.83247e-33	SCPs
MBP	4.11715e-37	0.462666	0.123	0.015	6.74678e-33	SCPs
FDX1	5.11671e-37	0.825229	0.823	0.68	8.38475e-33	SCPs
MMP2	6.41703e-37	0.55457	0.217	0.055	1.05156e-32	SCPs
ANGPTL4	7.63229e-37	0.330296	0.107	0.01	1.2507e-32	SCPs
PRIMA1	9.40847e-37	0.341158	0.129	0.017	1.54177e-32	SCPs
WBP5	9.78666e-37	0.500706	0.811	0.604	1.60374e-32	SCPs
PHLDA1	9.87032e-37	0.685762	0.429	0.197	1.61745e-32	SCPs
GLIPR2	1.21674e-36	0.507499	0.276	0.085	1.99388e-32	SCPs
TGFBR3	1.38395e-36	0.489407	0.215	0.052	2.26788e-32	SCPs
OSTC	3.05582e-36	0.537991	0.702	0.495	5.00757e-32	SCPs
MT2A	1.53279e-35	0.774409	0.831	0.629	2.51177e-31	SCPs
FN1	1.56763e-35	0.375067	0.143	0.023	2.56888e-31	SCPs
ITGA6	1.58165e-35	0.369756	0.121	0.015	2.59185e-31	SCPs
RAB20	2.6832e-35	0.46661	0.221	0.057	4.39696e-31	SCPs
DAB2	2.81885e-35	0.616017	0.262	0.079	4.61925e-31	SCPs
HSPD1	3.76235e-35	0.519768	0.93	0.838	6.16536e-31	SCPs
SAMHD1	6.11734e-35	0.492008	0.191	0.044	1.00245e-30	SCPs
APP	1.45483e-34	0.531055	0.664	0.456	2.38404e-30	SCPs
MARCKS	1.46189e-34	0.510267	0.883	0.779	2.3956e-30	SCPs
TSC22D4	3.80235e-34	0.689719	0.352	0.151	6.23091e-30	SCPs
TLN1	4.54574e-34	0.5713	0.338	0.133	7.4491e-30	SCPs
STAR	1.85848e-33	0.816227	0.793	0.651	3.04549e-29	SCPs
RAB38	2.02738e-33	0.560721	0.278	0.092	3.32227e-29	SCPs
FKBP10	2.39709e-33	0.546935	0.32	0.122	3.92811e-29	SCPs
SNCG	3.38155e-33	0.76288	0.567	0.343	5.54135e-29	SCPs
GYPC	4.5952e-33	0.615184	0.388	0.172	7.53015e-29	SCPs
ADAM23	1.43105e-32	0.343904	0.131	0.021	2.34507e-28	SCPs
TRIP6	4.51063e-32	0.34918	0.157	0.032	7.39157e-28	SCPs
ID2	6.11647e-32	0.711269	0.634	0.436	1.00231e-27	SCPs
PDK4	8.72234e-32	0.354607	0.135	0.023	1.42933e-27	SCPs
AHNAK	1.38547e-31	0.35985	0.169	0.037	2.27037e-27	SCPs
SYNE1	1.55387e-31	0.471157	0.225	0.066	2.54632e-27	SCPs
HSPG2	3.32941e-31	0.396896	0.191	0.048	5.4559e-27	SCPs
PNRC1	3.38899e-31	0.611006	0.588	0.391	5.55353e-27	SCPs
FOS	3.45592e-31	0.585548	0.905	0.817	5.66322e-27	SCPs
FAM166B	5.13123e-31	0.72846	0.457	0.238	8.40854e-27	SCPs
ARHGAP18	6.1442e-31	0.511116	0.233	0.07	1.00685e-26	SCPs
TIMP1	6.97761e-31	0.4876	0.666	0.436	1.14342e-26	SCPs
LPAR6	7.05158e-31	0.287208	0.121	0.018	1.15554e-26	SCPs
SPRED1	8.11681e-31	0.334364	0.141	0.026	1.3301e-26	SCPs
SYPL1	9.77209e-31	0.580258	0.366	0.162	1.60135e-26	SCPs
TPT1	1.04265e-30	0.429164	0.996	0.988	1.70859e-26	SCPs
CYP21A2	1.96648e-30	0.7714	0.414	0.192	3.22248e-26	SCPs
CIB1	2.5216e-30	0.531229	0.374	0.166	4.13214e-26	SCPs
GADD45B	3.24745e-30	0.6627	0.288	0.11	5.3216e-26	SCPs
ADAMTS6	4.43925e-30	0.358801	0.129	0.023	7.27459e-26	SCPs
PLPP1	7.50892e-30	0.527978	0.252	0.088	1.23049e-25	SCPs
TNFRSF1A	8.08582e-30	0.40414	0.199	0.054	1.32502e-25	SCPs
LINC00400	8.12141e-30	0.394604	0.155	0.033	1.33086e-25	SCPs
PSME1	1.16207e-29	0.512783	0.638	0.44	1.90428e-25	SCPs
MAPRE2	1.20162e-29	0.602292	0.39	0.194	1.9691e-25	SCPs
APOC1	1.69572e-29	0.808412	0.68	0.497	2.77877e-25	SCPs
RDX	1.97767e-29	0.555494	0.664	0.484	3.24081e-25	SCPs
CMTM7	2.55409e-29	0.278829	0.123	0.02	4.18539e-25	SCPs
COTL1	3.22446e-29	0.646441	0.366	0.174	5.28392e-25	SCPs
COL11A1	3.33675e-29	0.376478	0.155	0.034	5.46793e-25	SCPs
LITAF	4.04729e-29	0.6031	0.364	0.174	6.63229e-25	SCPs
CD83	4.34998e-29	0.481768	0.243	0.079	7.12832e-25	SCPs
VCL	4.35751e-29	0.368412	0.181	0.046	7.14066e-25	SCPs
RBMS3-AS3	5.70011e-29	0.277858	0.125	0.022	9.34078e-25	SCPs
CYB5B	7.31887e-29	0.57813	0.573	0.372	1.19934e-24	SCPs
HSPB6	7.5808e-29	0.499705	0.258	0.089	1.24227e-24	SCPs
MYLIP	7.76044e-29	0.520736	0.217	0.068	1.2717e-24	SCPs
NRXN3	7.99388e-29	0.328916	0.153	0.034	1.30996e-24	SCPs
SSR2	9.33818e-29	0.454108	0.805	0.675	1.53025e-24	SCPs
YBX3	1.08417e-28	0.578693	0.374	0.178	1.77663e-24	SCPs
CYP11A1	1.8772e-28	0.712226	0.594	0.37	3.07617e-24	SCPs
PEG10	2.11177e-28	0.785277	0.771	0.691	3.46055e-24	SCPs
GNG11	2.35184e-28	0.53396	0.374	0.171	3.85395e-24	SCPs
NDUFA4	3.06068e-28	0.299855	0.97	0.92	5.01554e-24	SCPs
PDIA6	3.2949e-28	0.504903	0.658	0.476	5.39935e-24	SCPs
MXRA8	3.39928e-28	0.378898	0.165	0.04	5.5704e-24	SCPs
C4orf3	3.40282e-28	0.562078	0.656	0.484	5.5762e-24	SCPs
C10orf11	3.52298e-28	0.412672	0.165	0.039	5.7731e-24	SCPs
SOCS3	5.46277e-28	0.610534	0.201	0.061	8.95183e-24	SCPs
ZNF503	8.07641e-28	0.445574	0.229	0.075	1.32348e-23	SCPs
COL15A1	9.19943e-28	0.531201	0.268	0.1	1.50751e-23	SCPs
IGF2BP2	1.0424e-27	0.553791	0.39	0.2	1.70819e-23	SCPs
AXL	1.05016e-27	0.384809	0.137	0.028	1.72089e-23	SCPs
LAMA4	1.9047e-27	0.605835	0.362	0.172	3.12123e-23	SCPs
IRF1	1.95071e-27	0.590347	0.211	0.067	3.19662e-23	SCPs
CTNNB1	2.15638e-27	0.636317	0.483	0.265	3.53366e-23	SCPs
POR	2.63184e-27	0.658395	0.499	0.292	4.31279e-23	SCPs
SPG20	5.28891e-27	0.407137	0.211	0.065	8.66694e-23	SCPs
SCN7A	5.54882e-27	0.445078	0.167	0.043	9.09285e-23	SCPs
SYNGR1	6.64133e-27	0.480523	0.276	0.109	1.08832e-22	SCPs
SOAT1	8.44185e-27	0.48977	0.278	0.105	1.38337e-22	SCPs
ANKRD50	1.0495e-26	0.432047	0.167	0.044	1.71981e-22	SCPs
SH3BP5	1.96968e-26	0.661831	0.416	0.218	3.22771e-22	SCPs
BTG1	2.02533e-26	0.407996	0.853	0.721	3.31891e-22	SCPs
SEPP1	2.11301e-26	0.523198	0.32	0.138	3.46259e-22	SCPs
HADHB	3.0786e-26	0.531374	0.469	0.272	5.04491e-22	SCPs
DST	3.68082e-26	0.587067	0.525	0.337	6.03175e-22	SCPs
BGN	3.77242e-26	0.461514	0.155	0.038	6.18187e-22	SCPs
LAMB2	3.79708e-26	0.306485	0.149	0.034	6.22227e-22	SCPs
BST2	6.32158e-26	0.538402	0.334	0.147	1.03592e-21	SCPs
GPX8	6.73651e-26	0.351031	0.145	0.033	1.10391e-21	SCPs
TPD52L1	6.93612e-26	0.344673	0.129	0.026	1.13662e-21	SCPs
TMEM47	7.24603e-26	0.438133	0.187	0.054	1.18741e-21	SCPs
EFEMP2	8.66421e-26	0.46448	0.237	0.085	1.4198e-21	SCPs
SPRY2	9.57289e-26	0.329438	0.153	0.038	1.56871e-21	SCPs
AIF1L	1.10487e-25	0.385821	0.209	0.067	1.81054e-21	SCPs
TSPAN6	1.17615e-25	0.453834	0.28	0.113	1.92735e-21	SCPs
HMG20B	1.92709e-25	0.495461	0.306	0.136	3.15792e-21	SCPs
RAB34	2.01671e-25	0.466747	0.334	0.151	3.30479e-21	SCPs
CHL1	2.11496e-25	0.321314	0.127	0.027	3.46579e-21	SCPs
H2AFJ	2.43128e-25	0.607353	0.396	0.205	3.98414e-21	SCPs
S100A4	2.75813e-25	0.546097	0.229	0.083	4.51974e-21	SCPs
RBPMS	2.96854e-25	0.365573	0.195	0.059	4.86454e-21	SCPs
LTBP1	3.76927e-25	0.288329	0.117	0.022	6.17671e-21	SCPs
IGFBP7	3.84894e-25	0.721853	0.37	0.186	6.30726e-21	SCPs
LDHB	5.31319e-25	0.330628	0.922	0.866	8.70673e-21	SCPs
ENDOD1	5.91974e-25	0.32593	0.145	0.035	9.70067e-21	SCPs
DLX2	7.4313e-25	0.32414	0.155	0.04	1.21777e-20	SCPs
ISG15	9.50744e-25	0.547431	0.207	0.068	1.55798e-20	SCPs
VPREB3	9.64862e-25	0.428644	0.129	0.028	1.58112e-20	SCPs
HDDC2	1.19555e-24	0.552358	0.467	0.294	1.95915e-20	SCPs
PPIF	1.33168e-24	0.53967	0.378	0.195	2.18222e-20	SCPs
KLF6	1.67777e-24	0.637425	0.573	0.412	2.74936e-20	SCPs
ANXA5	1.72312e-24	0.528861	0.527	0.352	2.82368e-20	SCPs
REST	2.70078e-24	0.345999	0.135	0.031	4.42577e-20	SCPs
P4HA1	2.79794e-24	0.434022	0.276	0.112	4.58499e-20	SCPs
TMEM258	2.93218e-24	0.312109	0.922	0.856	4.80496e-20	SCPs
MC2R	3.75212e-24	0.417264	0.183	0.054	6.14859e-20	SCPs
ITGAV	4.42692e-24	0.308317	0.145	0.036	7.2544e-20	SCPs
KLF2	5.07039e-24	0.507826	0.221	0.078	8.30884e-20	SCPs
GLTP	6.08469e-24	0.408079	0.239	0.09	9.97098e-20	SCPs
TMEM98	6.69819e-24	0.476239	0.354	0.177	1.09763e-19	SCPs
LAMB1	1.51185e-23	0.361515	0.175	0.053	2.47747e-19	SCPs
GJA1	2.23043e-23	0.288555	0.129	0.029	3.65501e-19	SCPs
ATP1B3	2.27239e-23	0.627668	0.545	0.385	3.72377e-19	SCPs
COL14A1	2.88122e-23	0.392043	0.105	0.02	4.72146e-19	SCPs
RRBP1	3.36147e-23	0.442789	0.217	0.077	5.50845e-19	SCPs
DUSP6	3.78688e-23	0.415211	0.254	0.103	6.20557e-19	SCPs
PPIB	3.80811e-23	0.371835	0.839	0.7	6.24034e-19	SCPs
RNF130	4.08856e-23	0.497352	0.294	0.138	6.69992e-19	SCPs
MIR202HG	5.52867e-23	0.440229	0.151	0.04	9.05982e-19	SCPs
MT1E	7.4979e-23	0.60245	0.286	0.125	1.22868e-18	SCPs
MDFIC	8.67864e-23	0.324935	0.115	0.024	1.42217e-18	SCPs
ITM2A	1.09652e-22	0.419128	0.119	0.026	1.79687e-18	SCPs
NR2F1	1.31882e-22	0.352875	0.167	0.048	2.16114e-18	SCPs
IRS1	1.35893e-22	0.372156	0.169	0.05	2.22687e-18	SCPs
HLA-E	2.62388e-22	0.383282	0.193	0.064	4.29976e-18	SCPs
PLAGL1	2.73434e-22	0.469233	0.284	0.124	4.48076e-18	SCPs
SPRY1	5.93488e-22	0.428671	0.151	0.042	9.7255e-18	SCPs
JUNB	6.00762e-22	0.574644	0.704	0.568	9.84468e-18	SCPs
ZNF536	6.06e-22	0.33378	0.175	0.054	9.93052e-18	SCPs
TBX3	8.63361e-22	0.54121	0.408	0.231	1.41479e-17	SCPs
FCGRT	9.48371e-22	0.478653	0.344	0.174	1.5541e-17	SCPs
CREB3L2	1.13228e-21	0.365605	0.189	0.064	1.85547e-17	SCPs
TNXB	1.1916e-21	0.500132	0.199	0.069	1.95267e-17	SCPs
IER2	1.62793e-21	0.570335	0.666	0.533	2.66769e-17	SCPs
TCF7L2	2.68557e-21	0.361317	0.183	0.061	4.40084e-17	SCPs
BTG2	3.29241e-21	0.4511	0.573	0.386	5.39528e-17	SCPs
SLC23A2	3.32134e-21	0.445104	0.229	0.09	5.44268e-17	SCPs
CALU	3.65134e-21	0.503313	0.416	0.246	5.98346e-17	SCPs
XKR4	4.1198e-21	0.4179	0.133	0.035	6.75112e-17	SCPs
IL11RA	5.53258e-21	0.441743	0.207	0.078	9.06623e-17	SCPs
TCEA3	8.71006e-21	0.462473	0.252	0.106	1.42732e-16	SCPs
EEF1A1	9.89025e-21	0.322943	1	1	1.62072e-16	SCPs
PRDX6	1.24872e-20	0.367034	0.704	0.563	2.04627e-16	SCPs
CLRN1	1.47054e-20	0.311168	0.125	0.031	2.40978e-16	SCPs
ADI1	2.19318e-20	0.490427	0.4	0.232	3.59396e-16	SCPs
HOTAIRM1	2.98156e-20	0.371962	0.171	0.056	4.88589e-16	SCPs
PHGDH	3.02839e-20	0.4638	0.276	0.13	4.96262e-16	SCPs
PHACTR2	3.58096e-20	0.427968	0.237	0.095	5.86811e-16	SCPs
CYTL1	3.66067e-20	0.260517	0.139	0.039	5.99874e-16	SCPs
SDCBP	3.80621e-20	0.486761	0.511	0.348	6.23724e-16	SCPs
RBM47	5.58634e-20	0.373059	0.167	0.053	9.15433e-16	SCPs
P3H2	5.6234e-20	0.382042	0.167	0.054	9.21507e-16	SCPs
APOA1	5.85701e-20	0.625344	0.39	0.234	9.59788e-16	SCPs
NFE2L2	6.26178e-20	0.449903	0.33	0.171	1.02612e-15	SCPs
DDIT4	7.18048e-20	0.510838	0.479	0.311	1.17667e-15	SCPs
BCL2L12	8.7975e-20	0.280613	0.129	0.034	1.44165e-15	SCPs
BAMBI	1.05011e-19	0.437871	0.189	0.068	1.72081e-15	SCPs
P4HB	1.25795e-19	0.437333	0.579	0.428	2.06141e-15	SCPs
RCN1	1.2617e-19	0.432886	0.328	0.171	2.06755e-15	SCPs
C11orf96	1.59842e-19	0.601323	0.37	0.211	2.61934e-15	SCPs
LMNA	1.64533e-19	0.539938	0.499	0.336	2.69621e-15	SCPs
DBI	1.75489e-19	0.476077	0.69	0.593	2.87574e-15	SCPs
ST3GAL4	2.17772e-19	0.480459	0.29	0.14	3.56862e-15	SCPs
GRB14	2.95035e-19	0.325235	0.151	0.046	4.83474e-15	SCPs
LUZP1	3.01104e-19	0.440299	0.227	0.094	4.9342e-15	SCPs
FAM126A	3.51685e-19	0.303291	0.155	0.049	5.76307e-15	SCPs
HSP90B1	3.56573e-19	0.35897	0.724	0.587	5.84316e-15	SCPs
COL6A2	3.78702e-19	0.291763	0.157	0.05	6.20578e-15	SCPs
HOPX	4.80066e-19	0.504141	0.223	0.092	7.86685e-15	SCPs
FOSB	5.46668e-19	0.629949	0.497	0.363	8.95825e-15	SCPs
PTN	6.12019e-19	0.296953	0.584	0.393	1.00292e-14	SCPs
TAX1BP3	7.53383e-19	0.463831	0.32	0.172	1.23457e-14	SCPs
C8orf4	7.82882e-19	0.35879	0.135	0.038	1.28291e-14	SCPs
EGR1	8.17066e-19	0.558604	0.575	0.446	1.33893e-14	SCPs
SHMT1	8.20234e-19	0.251258	0.125	0.034	1.34412e-14	SCPs
TJP1	8.56339e-19	0.367676	0.217	0.088	1.40328e-14	SCPs
HLA-B	8.6827e-19	0.487233	0.326	0.167	1.42283e-14	SCPs
FAM195A	1.00363e-18	0.493526	0.344	0.19	1.64465e-14	SCPs
NOTCH2	1.10036e-18	0.264628	0.107	0.026	1.80317e-14	SCPs
EGFLAM	1.12659e-18	0.296519	0.147	0.047	1.84615e-14	SCPs
PMP22	1.17082e-18	0.49951	0.62	0.475	1.91861e-14	SCPs
MATN2	1.21745e-18	0.319794	0.121	0.032	1.99504e-14	SCPs
SERPINB6	1.34203e-18	0.43341	0.376	0.216	2.19919e-14	SCPs
CYP17A1	1.87944e-18	0.793936	0.569	0.397	3.07983e-14	SCPs
LMCD1	2.06656e-18	0.312559	0.163	0.056	3.38647e-14	SCPs
SULT2A1	2.21173e-18	0.525075	0.421	0.239	3.62436e-14	SCPs
SHFM1	2.49695e-18	0.326258	0.757	0.669	4.09175e-14	SCPs
2020-09-02	2.71362e-18	0.505865	0.334	0.18	4.4468e-14	SCPs
TRAM1	3.43478e-18	0.448751	0.306	0.157	5.62857e-14	SCPs
CELF2	3.60912e-18	0.34165	0.191	0.074	5.91426e-14	SCPs
DAAM2	4.69066e-18	0.290805	0.145	0.045	7.68658e-14	SCPs
KIF13B	5.58746e-18	0.260479	0.107	0.027	9.15617e-14	SCPs
EVA1B	5.59861e-18	0.387276	0.227	0.097	9.17444e-14	SCPs
CMTM3	6.90559e-18	0.430449	0.286	0.144	1.13162e-13	SCPs
VGLL4	7.22766e-18	0.421416	0.364	0.21	1.1844e-13	SCPs
ECI2	8.4383e-18	0.44924	0.425	0.264	1.38278e-13	SCPs
ARRDC3	1.07373e-17	0.518444	0.388	0.226	1.75952e-13	SCPs
CTDSPL	1.20401e-17	0.275036	0.115	0.031	1.97301e-13	SCPs
DECR1	1.23667e-17	0.4083	0.37	0.213	2.02653e-13	SCPs
DMD	1.3833e-17	0.384722	0.229	0.1	2.26681e-13	SCPs
SPP1	1.69698e-17	0.317858	0.135	0.041	2.78085e-13	SCPs
LDLR	1.82883e-17	0.435042	0.266	0.128	2.9969e-13	SCPs
QPRT	1.83877e-17	0.44973	0.376	0.224	3.01318e-13	SCPs
KLF4	1.9491e-17	0.40398	0.169	0.062	3.194e-13	SCPs
MYH7B	1.99467e-17	0.401399	0.103	0.026	3.26867e-13	SCPs
SAT2	2.81208e-17	0.434217	0.503	0.358	4.60816e-13	SCPs
HOXA5	3.13203e-17	0.335682	0.157	0.054	5.13246e-13	SCPs
ADGRV1	3.8413e-17	0.308295	0.121	0.034	6.29474e-13	SCPs
FIGN	4.69011e-17	0.294935	0.145	0.048	7.68568e-13	SCPs
LPP	4.82872e-17	0.311139	0.165	0.059	7.91282e-13	SCPs
LIMCH1	4.97586e-17	0.360725	0.229	0.102	8.15395e-13	SCPs
IGFBP5	5.70379e-17	0.632369	0.296	0.151	9.3468e-13	SCPs
HLA-C	6.29419e-17	0.388034	0.378	0.221	1.03143e-12	SCPs
SSR3	1.74039e-16	0.483393	0.463	0.322	2.85198e-12	SCPs
OSR2	1.81171e-16	0.325524	0.129	0.04	2.96884e-12	SCPs
EPHX1	1.95897e-16	0.389822	0.189	0.076	3.21017e-12	SCPs
TMBIM6	2.82331e-16	0.369365	0.65	0.534	4.62656e-12	SCPs
CYP11B1	2.95476e-16	0.556142	0.26	0.126	4.84197e-12	SCPs
CPB1	3.09648e-16	0.323543	0.159	0.057	5.07419e-12	SCPs
ACSS1	3.3595e-16	0.292828	0.113	0.032	5.50521e-12	SCPs
GSTO1	3.45571e-16	0.403789	0.483	0.341	5.66288e-12	SCPs
TGFB1I1	3.66821e-16	0.333827	0.181	0.072	6.0111e-12	SCPs
CAST	4.26144e-16	0.367872	0.197	0.082	6.98321e-12	SCPs
GALM	4.68539e-16	0.258781	0.119	0.035	7.67796e-12	SCPs
PAPSS2	4.75375e-16	0.297978	0.151	0.052	7.78997e-12	SCPs
CTNNA1	5.5566e-16	0.385025	0.33	0.186	9.10561e-12	SCPs
PMEPA1	6.1222e-16	0.443691	0.205	0.089	1.00324e-11	SCPs
VMP1	9.31397e-16	0.457997	0.296	0.161	1.52628e-11	SCPs
SIGLEC11	1.02593e-15	0.317243	0.121	0.037	1.68119e-11	SCPs
SFRP1	1.31283e-15	0.514432	0.491	0.355	2.15134e-11	SCPs
CCND3	1.48425e-15	0.418399	0.288	0.157	2.43223e-11	SCPs
MCF2	1.76643e-15	0.310191	0.117	0.035	2.89465e-11	SCPs
MESDC2	1.79037e-15	0.364043	0.386	0.239	2.93389e-11	SCPs
TMED9	1.83071e-15	0.438282	0.525	0.408	2.99998e-11	SCPs
LIMS1	1.89645e-15	0.457276	0.338	0.201	3.10772e-11	SCPs
SERTAD1	1.90166e-15	0.59556	0.32	0.191	3.11624e-11	SCPs
PVRL2	1.9975e-15	0.375714	0.282	0.149	3.2733e-11	SCPs
GSDMD	2.52713e-15	0.256004	0.101	0.027	4.14121e-11	SCPs
C1orf198	2.60539e-15	0.372194	0.185	0.078	4.26946e-11	SCPs
ZNF275	2.97141e-15	0.330593	0.161	0.062	4.86925e-11	SCPs
CMTM8	3.4753e-15	0.349709	0.187	0.077	5.69498e-11	SCPs
CUEDC2	3.51037e-15	0.487681	0.586	0.502	5.75244e-11	SCPs
SNHG25	3.88154e-15	0.422513	0.501	0.355	6.36069e-11	SCPs
MGST2	4.30904e-15	0.425047	0.423	0.278	7.06122e-11	SCPs
GIPC2	4.86607e-15	0.295223	0.129	0.042	7.97403e-11	SCPs
ABCA1	4.96855e-15	0.252285	0.109	0.032	8.14196e-11	SCPs
HSPA1B	5.24832e-15	0.480065	0.6	0.484	8.60043e-11	SCPs
LDHA	5.78455e-15	0.375545	0.825	0.775	9.47915e-11	SCPs
ASPH	1.1447e-14	0.362073	0.209	0.096	1.87582e-10	SCPs
SNAP23	1.21846e-14	0.267773	0.115	0.036	1.9967e-10	SCPs
PPP1R15A	1.60831e-14	0.512604	0.445	0.322	2.63554e-10	SCPs
NOB1	1.64621e-14	0.400922	0.254	0.132	2.69764e-10	SCPs
FAM162A	2.02601e-14	0.436928	0.388	0.25	3.32002e-10	SCPs
BBX	2.23176e-14	0.399695	0.447	0.316	3.65718e-10	SCPs
SPTBN1	3.06476e-14	0.365044	0.451	0.308	5.02223e-10	SCPs
SCARB2	3.08175e-14	0.394491	0.312	0.183	5.05006e-10	SCPs
MTAP	3.95942e-14	0.272077	0.135	0.048	6.4883e-10	SCPs
NDUFC1	4.15729e-14	0.32357	0.714	0.625	6.81254e-10	SCPs
MRPL50	4.2995e-14	0.333021	0.326	0.188	7.04559e-10	SCPs
AGRN	4.44701e-14	0.314525	0.139	0.052	7.28732e-10	SCPs
SNX5	4.94032e-14	0.424644	0.3	0.174	8.09571e-10	SCPs
PRKCA	5.0555e-14	0.307922	0.171	0.072	8.28444e-10	SCPs
RCBTB2	9.17878e-14	0.264531	0.153	0.061	1.50413e-09	SCPs
DAP	9.36406e-14	0.328285	0.231	0.114	1.53449e-09	SCPs
MAN1A1	1.11686e-13	0.261871	0.101	0.03	1.83019e-09	SCPs
VAMP5	1.14007e-13	0.355879	0.215	0.102	1.86823e-09	SCPs
NBEAL1	1.3983e-13	0.373264	0.463	0.321	2.29139e-09	SCPs
MBNL2	1.43878e-13	0.266478	0.173	0.073	2.35773e-09	SCPs
PCGF5	1.54413e-13	0.256134	0.141	0.053	2.53037e-09	SCPs
SDHD	1.54598e-13	0.38761	0.302	0.178	2.5334e-09	SCPs
SCP2	1.58131e-13	0.32433	0.398	0.262	2.5913e-09	SCPs
ARID5B	1.62432e-13	0.287919	0.137	0.051	2.66177e-09	SCPs
ACTN4	1.85106e-13	0.405309	0.326	0.202	3.03333e-09	SCPs
ZG16B	1.85282e-13	0.303316	0.139	0.052	3.03622e-09	SCPs
GRAMD1B	2.06484e-13	0.282554	0.135	0.05	3.38365e-09	SCPs
SSFA2	2.25408e-13	0.260015	0.137	0.051	3.69376e-09	SCPs
AMHR2	2.31475e-13	0.358719	0.207	0.098	3.79318e-09	SCPs
C7	2.52763e-13	0.344104	0.165	0.068	4.14203e-09	SCPs
2020-09-07	2.92738e-13	0.406255	0.509	0.356	4.7971e-09	SCPs
SDHC	3.13493e-13	0.38303	0.503	0.384	5.13721e-09	SCPs
SERP1	3.14396e-13	0.362853	0.555	0.444	5.15201e-09	SCPs
HSPA12A	3.31045e-13	0.267728	0.119	0.041	5.42483e-09	SCPs
PELO	3.35197e-13	0.411663	0.268	0.151	5.49287e-09	SCPs
RAP1A	3.69605e-13	0.310316	0.245	0.127	6.05672e-09	SCPs
ABHD2	4.23371e-13	0.268783	0.171	0.074	6.93778e-09	SCPs
DNAJB4	5.43871e-13	0.368698	0.245	0.13	8.91241e-09	SCPs
NOSTRIN	5.86067e-13	0.260859	0.127	0.046	9.60389e-09	SCPs
CCDC8	6.24566e-13	0.259674	0.117	0.041	1.02348e-08	SCPs
MRAP	7.97503e-13	0.302087	0.169	0.071	1.30687e-08	SCPs
SLC39A10	8.19242e-13	0.38969	0.272	0.153	1.34249e-08	SCPs
FLRT3	1.26706e-12	0.331262	0.207	0.102	2.07633e-08	SCPs
BIRC7	1.27909e-12	0.305884	0.137	0.052	2.09604e-08	SCPs
DHCR24	1.43707e-12	0.527222	0.479	0.359	2.35492e-08	SCPs
MPG	1.5832e-12	0.347882	0.408	0.284	2.59438e-08	SCPs
FAM3C	1.65935e-12	0.363689	0.39	0.265	2.71918e-08	SCPs
ENO1	1.77876e-12	0.289318	0.885	0.833	2.91485e-08	SCPs
ROMO1	1.95031e-12	0.295264	0.71	0.627	3.19597e-08	SCPs
CASP9	2.69612e-12	0.328728	0.169	0.075	4.41813e-08	SCPs
IKBKAP	3.24276e-12	0.414443	0.239	0.128	5.31391e-08	SCPs
APRT	3.90654e-12	0.373519	0.555	0.458	6.40165e-08	SCPs
MAP3K1	7.37912e-12	0.286834	0.135	0.055	1.20922e-07	SCPs
PHLDA3	7.40658e-12	0.270814	0.109	0.039	1.21372e-07	SCPs
TXN2	9.27416e-12	0.320164	0.543	0.438	1.51976e-07	SCPs
DNAJB1	9.4335e-12	0.448273	0.634	0.536	1.54587e-07	SCPs
DPP10-AS1	9.71491e-12	0.254469	0.115	0.042	1.59198e-07	SCPs
DPM3	1.06244e-11	0.323688	0.406	0.277	1.74102e-07	SCPs
PBXIP1	1.27845e-11	0.270444	0.123	0.047	2.09499e-07	SCPs
EIF5B	1.35297e-11	0.373697	0.579	0.482	2.21711e-07	SCPs
REXO2	1.35846e-11	0.363881	0.276	0.163	2.22611e-07	SCPs
MLEC	1.37337e-11	0.417648	0.457	0.352	2.25054e-07	SCPs
SCARB1	1.43731e-11	0.467389	0.36	0.244	2.35532e-07	SCPs
2020-09-15	1.52215e-11	0.367422	0.374	0.246	2.49435e-07	SCPs
HES4	1.53795e-11	0.417897	0.304	0.195	2.52024e-07	SCPs
CSRP1	1.67125e-11	0.315371	0.197	0.1	2.73867e-07	SCPs
PLXDC2	1.69198e-11	0.250842	0.113	0.042	2.77264e-07	SCPs
GULP1	1.81755e-11	0.308784	0.213	0.11	2.97843e-07	SCPs
PRPF4B	1.86163e-11	0.415909	0.328	0.208	3.05065e-07	SCPs
CLNS1A	1.98767e-11	0.343026	0.503	0.397	3.2572e-07	SCPs
VAPA	2.1855e-11	0.27795	0.716	0.643	3.58138e-07	SCPs
IL6ST	2.32365e-11	0.284235	0.141	0.06	3.80776e-07	SCPs
ZFAND5	2.48684e-11	0.358865	0.447	0.343	4.07519e-07	SCPs
SKAP2	3.06075e-11	0.250595	0.129	0.051	5.01565e-07	SCPs
FBL	3.27629e-11	0.33399	0.541	0.451	5.36886e-07	SCPs
ACADVL	3.87936e-11	0.36365	0.455	0.344	6.35711e-07	SCPs
ERGIC3	4.12435e-11	0.277675	0.596	0.507	6.75857e-07	SCPs
ZFP36L2	4.76854e-11	0.393837	0.487	0.381	7.8142e-07	SCPs
SERBP1	5.00408e-11	0.271798	0.748	0.697	8.20018e-07	SCPs
PKN2	5.16492e-11	0.298045	0.207	0.108	8.46375e-07	SCPs
NPM3	5.17293e-11	0.310534	0.3	0.187	8.47689e-07	SCPs
TPT1-AS1	5.4401e-11	0.361718	0.256	0.15	8.9147e-07	SCPs
ALAS1	5.8542e-11	0.339271	0.211	0.112	9.59328e-07	SCPs
SERPINA5	5.99845e-11	0.271659	0.211	0.109	9.82966e-07	SCPs
ELOVL1	6.25678e-11	0.273715	0.169	0.08	1.0253e-06	SCPs
SLC16A1	6.48209e-11	0.284509	0.177	0.087	1.06222e-06	SCPs
CEBPB	6.71396e-11	0.260057	0.26	0.147	1.10022e-06	SCPs
IMPDH2	6.89303e-11	0.327366	0.531	0.442	1.12956e-06	SCPs
HEY1	8.13908e-11	0.335184	0.149	0.068	1.33375e-06	SCPs
UGCG	8.73596e-11	0.460464	0.3	0.192	1.43156e-06	SCPs
HIF3A	9.94448e-11	0.294292	0.241	0.133	1.6296e-06	SCPs
WSB1	1.02586e-10	0.318233	0.533	0.441	1.68107e-06	SCPs
CCND2	1.04337e-10	0.284841	0.284	0.17	1.70978e-06	SCPs
DDIT3	1.07827e-10	0.38253	0.274	0.166	1.76697e-06	SCPs
S100A6	1.08219e-10	0.26999	0.777	0.688	1.77338e-06	SCPs
CD59	1.17417e-10	0.34034	0.515	0.418	1.92412e-06	SCPs
SCPEP1	1.19163e-10	0.392323	0.268	0.163	1.95272e-06	SCPs
ALDH9A1	1.1941e-10	0.29469	0.239	0.135	1.95677e-06	SCPs
TXNIP	1.19527e-10	0.343317	0.39	0.269	1.95869e-06	SCPs
PRCP	1.74549e-10	0.268774	0.223	0.121	2.86033e-06	SCPs
CDC73	1.83794e-10	0.254032	0.171	0.082	3.01184e-06	SCPs
TMEM256	2.08489e-10	0.338546	0.451	0.35	3.41651e-06	SCPs
LEPROT	2.16648e-10	0.381965	0.33	0.224	3.55021e-06	SCPs
PRR13	2.18276e-10	0.342661	0.328	0.223	3.57689e-06	SCPs
STK19	2.24525e-10	0.327159	0.274	0.17	3.67929e-06	SCPs
GRPEL1	2.44144e-10	0.395107	0.302	0.196	4.0008e-06	SCPs
C8orf33	2.63094e-10	0.308272	0.338	0.224	4.31132e-06	SCPs
NR5A1	2.81132e-10	0.258643	0.131	0.056	4.60692e-06	SCPs
LINC00998	3.0509e-10	0.324468	0.423	0.31	4.9995e-06	SCPs
CADM4	3.0668e-10	0.302234	0.183	0.095	5.02557e-06	SCPs
PACSIN3	3.26318e-10	0.25538	0.139	0.062	5.34738e-06	SCPs
MRPS28	3.36472e-10	0.303946	0.229	0.128	5.51376e-06	SCPs
PSMB8	3.40495e-10	0.257014	0.129	0.054	5.57968e-06	SCPs
TSPAN18	3.70704e-10	0.262754	0.181	0.092	6.07472e-06	SCPs
PRKAR1A	4.88767e-10	0.289739	0.521	0.422	8.00942e-06	SCPs
CTSA	4.95252e-10	0.323753	0.25	0.148	8.1157e-06	SCPs
DCTD	6.18988e-10	0.319993	0.284	0.182	1.01434e-05	SCPs
BZW2	6.69279e-10	0.306051	0.338	0.233	1.09675e-05	SCPs
PRDX3	7.03951e-10	0.322361	0.598	0.534	1.15356e-05	SCPs
OXR1	7.06082e-10	0.262932	0.276	0.169	1.15706e-05	SCPs
RND3	7.23367e-10	0.313963	0.4	0.289	1.18538e-05	SCPs
COA4	7.48029e-10	0.329623	0.457	0.365	1.2258e-05	SCPs
GPC1	7.86909e-10	0.278053	0.149	0.071	1.28951e-05	SCPs
LSR	8.48994e-10	0.310979	0.183	0.095	1.39125e-05	SCPs
SMAD5	8.5999e-10	0.275079	0.197	0.105	1.40927e-05	SCPs
LSM14A	1.06603e-09	0.329861	0.342	0.24	1.7469e-05	SCPs
C10orf10	1.17131e-09	0.301316	0.143	0.067	1.91943e-05	SCPs
CTSC	1.35273e-09	0.275393	0.195	0.106	2.21672e-05	SCPs
MAFF	1.7869e-09	0.448964	0.195	0.108	2.92819e-05	SCPs
KLHDC8B	1.81625e-09	0.384135	0.515	0.436	2.97629e-05	SCPs
MOB4	1.97227e-09	0.363197	0.459	0.358	3.23196e-05	SCPs
UBL3	2.15461e-09	0.283503	0.197	0.108	3.53076e-05	SCPs
PUF60	2.2669e-09	0.343476	0.475	0.393	3.71476e-05	SCPs
BCL7C	2.57758e-09	0.322754	0.284	0.186	4.22388e-05	SCPs
ALDH1A2	2.68122e-09	0.275806	0.141	0.067	4.39371e-05	SCPs
DUSP5	2.81474e-09	0.303011	0.147	0.071	4.61251e-05	SCPs
MCL1	2.86217e-09	0.393835	0.372	0.281	4.69024e-05	SCPs
TP53I13	3.02058e-09	0.277614	0.193	0.105	4.94983e-05	SCPs
FGF12	3.19412e-09	0.338502	0.171	0.089	5.2342e-05	SCPs
REEP6	3.3103e-09	0.30829	0.171	0.09	5.4246e-05	SCPs
AKAP7	3.95384e-09	0.314031	0.227	0.133	6.47916e-05	SCPs
HOXB7	4.10226e-09	0.263922	0.161	0.081	6.72237e-05	SCPs
NR4A1	4.32729e-09	0.312499	0.465	0.363	7.09113e-05	SCPs
PHB	4.48342e-09	0.261092	0.565	0.499	7.34698e-05	SCPs
ENO3	4.6799e-09	0.272341	0.133	0.062	7.66895e-05	SCPs
DFNB31	4.8793e-09	0.27223	0.129	0.06	7.9957e-05	SCPs
LMAN1	5.15036e-09	0.357625	0.342	0.242	8.43989e-05	SCPs
C14orf1	5.97891e-09	0.318992	0.396	0.301	9.79764e-05	SCPs
SLC39A1	6.02861e-09	0.2672	0.217	0.125	9.87909e-05	SCPs
GNAI2	6.30781e-09	0.327834	0.33	0.234	0.000103366	SCPs
ING2	7.34197e-09	0.370931	0.302	0.208	0.000120313	SCPs
TAPBP	8.00108e-09	0.278871	0.149	0.074	0.000131114	SCPs
DHRS4L2	8.40766e-09	0.30418	0.252	0.158	0.000137776	SCPs
TMEM123	8.75021e-09	0.320363	0.256	0.165	0.00014339	SCPs
SLC16A9	9.29553e-09	0.264988	0.123	0.056	0.000152326	SCPs
PSAT1	1.14058e-08	0.296375	0.209	0.123	0.000186907	SCPs
PSME2	1.17472e-08	0.266309	0.499	0.411	0.000192501	SCPs
GALNT2	1.32537e-08	0.257201	0.209	0.12	0.000217188	SCPs
PLTP	1.36923e-08	0.270606	0.161	0.083	0.000224375	SCPs
TEX264	1.45405e-08	0.294396	0.278	0.183	0.000238274	SCPs
SLC26A2	1.48994e-08	0.254487	0.137	0.066	0.000244156	SCPs
C14orf119	1.70449e-08	0.306103	0.266	0.177	0.000279315	SCPs
UBXN2A	1.71209e-08	0.280795	0.167	0.089	0.00028056	SCPs
SGCE	1.85514e-08	0.346563	0.266	0.174	0.000304001	SCPs
CTDSP2	2.34448e-08	0.284628	0.205	0.121	0.00038419	SCPs
CD46	2.63635e-08	0.327859	0.3	0.21	0.000432018	SCPs
RORA	2.79165e-08	0.331179	0.209	0.124	0.000457468	SCPs
DNPH1	2.8726e-08	0.337039	0.421	0.333	0.000470733	SCPs
GPC6	3.24311e-08	0.320076	0.207	0.125	0.000531449	SCPs
NFKBIA	3.25886e-08	0.370675	0.3	0.209	0.000534029	SCPs
CMTM6	4.85199e-08	0.281663	0.249	0.161	0.000795095	SCPs
PPP1R14A	5.38188e-08	0.278861	0.185	0.105	0.000881929	SCPs
ITGB1	5.39305e-08	0.353188	0.499	0.437	0.000883759	SCPs
ID1	6.17058e-08	0.60279	0.467	0.407	0.00101117	SCPs
CREM	6.24325e-08	0.295796	0.485	0.392	0.00102308	SCPs
SIVA1	6.9834e-08	0.286654	0.509	0.452	0.00114437	SCPs
IGF2	7.29653e-08	0.272971	0.757	0.69	0.00119568	SCPs
NQO2	7.83007e-08	0.253844	0.167	0.09	0.00128311	SCPs
PHF20L1	8.24671e-08	0.326866	0.288	0.203	0.00135139	SCPs
RWDD4	8.94951e-08	0.342048	0.296	0.211	0.00146656	SCPs
SCD5	9.13448e-08	0.273045	0.147	0.078	0.00149687	SCPs
MRPL10	9.79574e-08	0.273581	0.254	0.168	0.00160523	SCPs
SECISBP2L	9.83653e-08	0.257193	0.177	0.1	0.00161191	SCPs
BRE	1.04312e-07	0.254429	0.231	0.146	0.00170936	SCPs
TMEM97	1.0723e-07	0.341392	0.404	0.324	0.00175717	SCPs
TMED10	1.2156e-07	0.312959	0.41	0.331	0.00199201	SCPs
SH3BGRL	1.35457e-07	0.289181	0.398	0.31	0.00221974	SCPs
SFT2D1	1.43966e-07	0.281198	0.29	0.201	0.00235918	SCPs
ARL14EP	1.65809e-07	0.278307	0.177	0.103	0.00271711	SCPs
LAPTM4B	1.67509e-07	0.274708	0.402	0.316	0.00274496	SCPs
RSL1D1	1.70099e-07	0.271087	0.497	0.415	0.00278742	SCPs
FAM210B	1.91916e-07	0.310337	0.342	0.262	0.00314493	SCPs
FAM133B	2.18797e-07	0.310708	0.414	0.337	0.00358543	SCPs
IVD	2.20235e-07	0.274515	0.203	0.124	0.00360899	SCPs
STOML2	2.48972e-07	0.276196	0.507	0.447	0.0040799	SCPs
WASF2	2.50424e-07	0.275382	0.388	0.304	0.0041037	SCPs
INSR	2.53806e-07	0.469722	0.245	0.164	0.00415913	SCPs
PTK2	2.68155e-07	0.268186	0.163	0.093	0.00439426	SCPs
RFXANK	2.92703e-07	0.265687	0.217	0.139	0.00479652	SCPs
SYAP1	3.22919e-07	0.359137	0.35	0.271	0.00529167	SCPs
ELAVL1	3.27592e-07	0.285661	0.34	0.258	0.00536826	SCPs
HSPA1A	3.65338e-07	0.373725	0.658	0.601	0.00598679	SCPs
TMEM245	3.92091e-07	0.255646	0.225	0.145	0.00642519	SCPs
RBBP7	4.2953e-07	0.278962	0.437	0.367	0.00703871	SCPs
SLC25A37	4.32609e-07	0.324181	0.3	0.215	0.00708916	SCPs
FARP1	5.25973e-07	0.285818	0.256	0.175	0.00861911	SCPs
NUCB1	5.82425e-07	0.291731	0.292	0.211	0.0095442	SCPs
SURF6	6.31186e-07	0.256328	0.189	0.116	0.0103432	SCPs
CLEC11A	7.11262e-07	0.343502	0.306	0.228	0.0116555	SCPs
NOP16	7.23035e-07	0.299706	0.215	0.139	0.0118484	SCPs
CCDC47	7.58964e-07	0.258109	0.171	0.101	0.0124371	SCPs
RBBP6	8.51832e-07	0.299221	0.29	0.21	0.013959	SCPs
FRMD4A	8.86206e-07	0.256041	0.139	0.077	0.0145223	SCPs
PLA2G16	9.4501e-07	0.25332	0.159	0.09	0.0154859	SCPs
HSPA9	1.10589e-06	0.293605	0.455	0.396	0.0181222	SCPs
ELP5	1.21142e-06	0.297262	0.288	0.21	0.0198515	SCPs
FADS2	1.23976e-06	0.312195	0.254	0.184	0.020316	SCPs
HIBADH	1.27221e-06	0.250763	0.205	0.131	0.0208477	SCPs
ATF3	1.32207e-06	0.369142	0.27	0.193	0.0216647	SCPs
CCS	1.40393e-06	0.255036	0.266	0.188	0.0230061	SCPs
AC020571.3	1.54891e-06	0.308479	0.131	0.072	0.025382	SCPs
GIPC1	1.63956e-06	0.273947	0.229	0.158	0.0268674	SCPs
PEG3	1.77821e-06	0.357976	0.338	0.269	0.0291395	SCPs
GTPBP4	1.87274e-06	0.279637	0.268	0.192	0.0306885	SCPs
ECH1	2.17553e-06	0.264491	0.577	0.524	0.0356504	SCPs
CHMP4A	2.35657e-06	0.251883	0.262	0.186	0.038617	SCPs
GLUL	3.01319e-06	0.299107	0.306	0.237	0.0493772	SCPs
C1orf56	3.41201e-06	0.295795	0.183	0.114	0.0559126	SCPs
RER1	3.51047e-06	0.277625	0.356	0.288	0.0575261	SCPs
GSTA4	4.62673e-06	0.297203	0.567	0.53	0.0758182	SCPs
LGALS3BP	4.69344e-06	0.2641	0.25	0.177	0.0769114	SCPs
COL6A1	5.07151e-06	0.264249	0.221	0.154	0.0831068	SCPs
TPM4	5.73813e-06	0.308977	0.39	0.333	0.0940307	SCPs
BZW1	5.90625e-06	0.272268	0.414	0.353	0.0967858	SCPs
MSI2	6.02598e-06	0.270539	0.284	0.212	0.0987478	SCPs
FAM207A	6.77069e-06	0.271399	0.26	0.187	0.110951	SCPs
MRPS6	6.81409e-06	0.260423	0.499	0.437	0.111662	SCPs
TROVE2	7.48197e-06	0.278185	0.308	0.239	0.122607	SCPs
PLK2	7.9057e-06	0.342034	0.199	0.135	0.129551	SCPs
PAPOLA	8.27371e-06	0.273221	0.463	0.41	0.135581	SCPs
TMEM120A	9.55296e-06	0.322004	0.249	0.185	0.156544	SCPs
ACAA2	1.15426e-05	0.258634	0.316	0.25	0.189149	SCPs
SQSTM1	1.17558e-05	0.254286	0.36	0.294	0.192642	SCPs
NSRP1	1.27818e-05	0.278917	0.252	0.182	0.209455	SCPs
BCAP31	1.29722e-05	0.256207	0.437	0.382	0.212576	SCPs
RHOBTB3	1.45015e-05	0.252941	0.398	0.334	0.237637	SCPs
PGRMC1	1.70651e-05	0.269296	0.535	0.508	0.279646	SCPs
MCFD2	1.8277e-05	0.260668	0.258	0.19	0.299505	SCPs
MRPL16	2.05329e-05	0.260241	0.243	0.177	0.336472	SCPs
MOCS2	2.40696e-05	0.251201	0.262	0.194	0.394428	SCPs
CYBA	2.8066e-05	0.316875	0.362	0.304	0.459917	SCPs
PPT1	2.94031e-05	0.272833	0.195	0.135	0.481828	SCPs
C9orf3	3.80019e-05	0.309096	0.312	0.252	0.622737	SCPs
CD55	3.93695e-05	0.279585	0.179	0.12	0.645148	SCPs
PTS	3.99847e-05	0.292078	0.579	0.59	0.655229	SCPs
MBOAT7	4.76193e-05	0.262324	0.233	0.171	0.780338	SCPs
HIF1A	4.82596e-05	0.267451	0.294	0.232	0.790829	SCPs
HMGCR	5.10439e-05	0.269961	0.221	0.161	0.836456	SCPs
ATP2B1	5.20602e-05	0.277148	0.326	0.269	0.853111	SCPs
CCDC107	5.23311e-05	0.250678	0.372	0.312	0.85755	SCPs
SETD5	5.73552e-05	0.274401	0.233	0.173	0.939879	SCPs
INTS6	6.17007e-05	0.267287	0.209	0.148	1	SCPs
PNRC2	9.98275e-05	0.277126	0.254	0.195	1	SCPs
CEBPD	0.000100301	0.296382	0.197	0.137	1	SCPs
AVPI1	0.000103216	0.296928	0.147	0.095	1	SCPs
SIAH2	0.000114384	0.332403	0.29	0.24	1	SCPs
FGFBP3	0.000151998	0.296018	0.105	0.062	1	SCPs
SREK1	0.000174133	0.253988	0.352	0.302	1	SCPs
CCL2	0.000177889	0.279181	0.141	0.093	1	SCPs
AP1S2	0.000265143	0.26879	0.465	0.441	1	SCPs
IDI1	0.000397734	0.292419	0.445	0.411	1	SCPs
PHACTR1	0.000449295	0.262701	0.135	0.09	1	SCPs
KCNK3	0.0054484	0.301583	0.225	0.192	1	SCPs
HBB	0.0079278	0.477261	0.322	0.412	1	SCPs
ASCL1	0.00964337	0.278639	0.109	0.078	1	SCPs

## Sheet: MAJD 2023
Top 10 DE Genes			Neurotrophic Factors			Transcription Factors
Low passage	High passage		BDNF			SRY
UBE2S	PTTG1		NGF			SOX1
METAP2	AC073195.1		NTF3			SOX2
AC073195.1	PTMS		NTF4			SOX3
TOP1	NUCKS1		CNTF			SOX4
KCNRG	TOP1		LIF			SOX5
AL117379.1	AC087239.1		IL6			SOX6
AP001527.2	AC099522.2		PRL			SOX7
PAN3-AS1	AL133367.1		GH1			SOX8
AP002026.1	AC015912.3		LEP			SOX9
AC144652.1	AC010331.1		IFNA1			SOX10
HIST1H4C	HIST1H4C		IFNA2			SOX11
CCDC85B	TOP2A		IFNA4			SOX12
FOSL1	HIST1H1D		IFNA5			SOX13
IER5L	CDK1		IFNA6			SOX14
CDK1	HIST1H1B		IFNA7			SOX15
HIST1H1B	HIST1H1C		IFNA8			SOX17
HIST1H1D	MKI67		IFNA10			SOX18
HES4	RGS2		IFNA13			SOX21
FBXO5	FBXO5		IFNA14			SOX30
INSIG1	PCLAF		IFNA16			POU1F1
TIMP3	COL4A1		IFNA17			POU2F1
COL12A1	ALCAM		IFNA21			POU2F2
ADAMTS5	IGFBP5		IFNB1			POU2F3
FST	S100B		IFNG			POU3F1
CDH19	SPARC		OSM			POU3F2
GAP43	COL4A2		GDNF			POU3F3
PTPRD	SCRG1		ARTN			POU3F4
HCG9	COL11A1		NRTN			POU4F1
POSTN	FN1		PSPN			POU4F2
PLK2	ANXA2		EFNA1			POU4F3
MLANA	SAT1		EFNA2			POU5F1
PMEL	APOE		EFNA3			POU5F1P1
APOE	MLANA		EFNA4			POU5F1P3
TYRP1	BCAN		EFNA5			POU5F1P4
AC022081.1	PTGDS		EFNB1			POU5F2
TRPM1	DMD		EFNB2			POU6F1
LGALS3	ZNF106		EFNB3			POU6F2
PAEP	NSG1		EGF			PAX1
DCT	NEAT1		NRG1			PAX2
MIT	CDKN2A		NRG2			PAX3
			NRG3			PAX4
			NRG4			PAX5
			TGFA			PAX6
			TGBF1			PAX7
			TGFB2			PAX8
			TGFB3			PAX9
			GMFB			FOXA1
			INS			FOXA2
			IGF1			FOXA3
			VEGFA			FOXB1
			VEGFB			FOXB2
			VEGFC			FOXC1
			VEGFD			FOXC2
			PGF			FOXD1
			FGF1			FOXD2
			FGF2			FOXD3
			FGF3			FOXD4
			FGF4			FOXD5
			FGF5			FOXE1
			FGF6			FOXE2
			FGF7			FOXE3
			FGF8			FOXF1
			FGF9			FOXF2
			FGF10			FOXG1
			FGF11			FOXH1
			FGF12			FOXI1
			FGF13			FOXI2
			FGF14			FOXJ1
			FGF15			FOXJ2
			FGF16			FOXJ3
			FGF17			FOXK1
			FGF18			FOXK2
			FGF19			FOXM1
			FGF20			FOXN1
			FGF21			FOXN2
			FGF22			FOXN3
			FGF23			FOXN4
			PDGF			FOXO1
			ADCYAP1			FOXO3
			IL1			FOXO4
			IL2			FOXO6
			IL3			FOXP1
			IL5			FOXP2
			CXCL8			FOXP3
			CSF1			FOXP4
			CSF2			FOXQ1
			CXCL1			FOXR1
						FOXR2
						TBXT
						TBR1
						TBX1
						TBX2
						TBX3
						TBX4
						TBX5
						TBX6
						TBX10
						TBX15
						TBX18
						TBX19
						TBX20
						TBX21
						TBX22
						HOXA1
						HOXA2
						HOXA3
						HOXA4
						HOXA5
						HOXA6
						HOXA7
						HOXA8
						HOXA9
						HOXA10
						HOXA11
						HOXA12
						HOXA13
						HOXB1
						HOXB2
						HOXB3
						HOXB4
						HOXB5
						HOXB6
						HOXB7
						HOXB8
						HOXB9
						HOXB13
						HOXC4
						HOXC5
						HOXC6
						HOXC8
						HOXC9
						HOXC10
						HOXC11
						HOXC12
						HOXC13
						HOXD1
						HOXD3
						HOXD4
						HOXD8
						HOXD9
						HOXD10
						HOXD11
						HOXD12
						HOXD13
						RUNX1
						RUNX2
						RUNX3
						E2F1
						E2F2
						E2F3
						E2F4
						E2F5
						E2F6
						E2F7
						E2F8
						EHF
						ELF1
						ELF2
						ELF3
						ELF4
						ELF5
						ELK1
						ELK3
						ELK4
						ERF
						ERG
						ETS1
						ETS2
						ETV1
						ETV2
						ETV3
						ETV3L
						ETV4
						ETV5
						ETV6
						ETV7
						FEV
						FLI1
						GABPA
						SPDEF
						SPIB
						SPIC
						SPI1
						FOS
						FOSB
						FOSL1
						FOSL2
						JUN
						JUNB
						JUND

## Sheet: Comparison
	GENE ID comparison
	Our	Janksy 2021	Our	Dong 2020	Our	Majd 2023
1	TRIM48	OLFML2A	TRIM48	S100B	TRIM48	UBE2S
2	AHR	NRXN3	AHR	CRYAB	AHR	METAP2
3	DLX2	SLC35F1	DLX2	STAR	DLX2	AC073195.1
4	MPZ	CDH19	MPZ	ALDH1A1	MPZ	TOP1
5	FHDC1	ABCA8	FHDC1	NOV	FHDC1	KCNRG
6	MIR6756	PRDM16	MIR6756	MT3	MIR6756	AL117379.1
7	GFRA1	MPZ	GFRA1	RGCC	GFRA1	AP001527.2
8	SERPINB9	ARHGAP15	SERPINB9	FXYD1	SERPINB9	PAN3-AS1
9	MOXD1	CHST9	MOXD1	INHA	MOXD1	AP002026.1
10	DLX1	LRRTM4	DLX1	OLFML2A	DLX1	AC144652.1
11	NPR3	SHISA9	NPR3	TMEM176A	NPR3	HIST1H4C
12	RXRG	COL5A2	RXRG	MGARP	RXRG	CCDC85B
13	CDH19	XKR4	CDH19	TMEM176B	CDH19	FOSL1
14	EDNRB	TRPM3	EDNRB	ABCA8	EDNRB	IER5L
15	KANK4	SAMHD1	KANK4	RNASE1	KANK4	CDK1
16	FAM198B	RP11-308N19.1	FAM198B	CYP11A1	FAM198B	HIST1H1B
17	LOC440040	INSC	LOC440040	LGALS1	LOC440040	HIST1H1D
18	DUSP4	RP11-242P2.1	DUSP4	CYP21A2	DUSP4	HES4
19	CELF2	NRXN1	CELF2	FAM166B	CELF2	FBXO5
20	MMP17	IL1RAPL1	MMP17	MEF2C	MMP17	INSIG1
21	LRP2	PTPRZ1	LRP2	APOE	LRP2	TIMP3
22	TRIM49D1	NR2F2-AS1	TRIM49D1	DLK1	TRIM49D1	COL12A1
23	MGLL	LAMA2	MGLL	HSPB2	MGLL	ADAMTS5
24	ATP10B	LPL	ATP10B	LGI4	ATP10B	FST
25	ADAM12	PLP1	ADAM12	B2M	ADAM12	CDH19
26	S100B	SCN7A	S100B	IGF2	S100B	GAP43
27	SSUH2	TGFBR2	SSUH2	SPARC	SSUH2	PTPRD
28	LGI4	GINS3	LGI4	MPZ	LGI4	HCG9
29	PTPRZ1	DST	PTPRZ1	SULT2A1	PTPRZ1	POSTN
30	MEGF10	PRIMA1	MEGF10	ZFP36	MEGF10	PLK2
31	CAV1	GPR126	CAV1	IFITM3	CAV1	MLANA
32	ERBB3	PLCE1	ERBB3	ITGA1	ERBB3	PMEL
33	DCX	TMEM132B	DCX	ALDOA	DCX	APOE
34	PAG1	PARD3B	PAG1	IFI16	PAG1	TYRP1
35	TRIM49D2	PLAT	TRIM49D2	COL15A1	TRIM49D2	AC022081.1
36	GAS7	SHC4	GAS7	HBG2	GAS7	TRPM1
37	CDH6	CHL1	CDH6	HSPB6	CDH6	LGALS3
38	SFRP1	ERBB3	SFRP1	ARPC1B	SFRP1	PAEP
39	PROSER2	POLR2F	PROSER2	FDX1	PROSER2	DCT
40	ENC1	FHDC1	ENC1	MYL9	ENC1	MIT
41	ID4	NKAIN2	ID4	COL1A1	ID4	PTTG1
42	INSC	ZEB2	INSC	PMP22	INSC	AC073195.1
43	FSTL5	GRIN2B	FSTL5	IGFBP7	FSTL5	PTMS
44	TMOD2	STARD13	TMOD2	ARHGAP15	TMOD2	NUCKS1
45	FOXD2	SEMA3C	FOXD2	PLAT	FOXD2	TOP1
46	CAMK2N1	IL1RAPL2	CAMK2N1	PLP1	CAMK2N1	AC087239.1
47	OXTR	QKI	OXTR	APOC1	OXTR	AC099522.2
48	POSTN	ADAM23	POSTN	FDXR	POSTN	AL133367.1
49	MIR9-2	S100B	MIR9-2	BST2	MIR9-2	AC015912.3
50	BCAN	EDNRB	BCAN	HBA2	BCAN	AC010331.1
51	SLITRK6	SNTB1	SLITRK6	MT2A	SLITRK6	HIST1H4C
52	MMP15	NAALADL2	MMP15	HBA1	MMP15	TOP2A
53	ANKRD20A3	VGLL3	ANKRD20A3	TCEA3	ANKRD20A3	HIST1H1D
54	NGFR	AFAP1L2	NGFR	SH3BP5	NGFR	CDK1
55	PLEKHH1	NKAIN3	PLEKHH1	CD63	PLEKHH1	HIST1H1B
56	KCTD12	RGCC	KCTD12	NDRG2	KCTD12	HIST1H1C
57	PACSIN3	PKNOX2	PACSIN3	TNNI3	PACSIN3	MKI67
58	CADM1	GPM6B	CADM1	LAPTM4A	CADM1	RGS2
59	LINC01314	ARHGAP42	LINC01314	TIMP3	LINC01314	FBXO5
60	WIPF3	PPP2R2B	WIPF3	TOMM7	WIPF3	PCLAF
61	PMP2	TTYH1	PMP2	PLAC9	PMP2	COL4A1
62	SEMA3C	SH3D19	SEMA3C	IFITM2	SEMA3C	ALCAM
63	ANKRD20A2	SYNPR	ANKRD20A2	COL1A2	ANKRD20A2	IGFBP5
64	HCN1	ARHGAP31	HCN1	EMP3	HCN1	S100B
65	ANKRD20A1	WWTR1	ANKRD20A1	LY6E	ANKRD20A1	SPARC
66	GDNF	PPFIBP1	GDNF	C6orf48	GDNF	COL4A2
67	LMO4	COL25A1	LMO4	RHOC	LMO4	SCRG1
68	GRIK2	AHR	GRIK2	CDH19	GRIK2	COL11A1
69	PPP2R2B	PTPRJ	PPP2R2B	SCARB1	PPP2R2B	FN1
70	LHX1	SOX5	LHX1	MT1E	LHX1	ANXA2
71	ANKRD20A4	AQP4-AS1	ANKRD20A4	S100A10	ANKRD20A4	SAT1
72	SEMA3G	KCNH8	SEMA3G	ANXA2	SEMA3G	MLANA
73	KCNK5	COL4A2	KCNK5	NFIA	KCNK5	BCAN
74	GAL3ST1	RP11-776H12.1	GAL3ST1	OAF	GAL3ST1	PTGDS
75	GFRA3	RASSF4	GFRA3	SCRG1	GFRA3	DMD
76	MYCN	SOX10	MYCN	PSME1	MYCN	ZNF106
77	GJB1	LAMA4	GJB1	TBX3	GJB1	NSG1
78	S100A10	KIAA1217	S100A10	ITM2B	S100A10	NEAT1
79	SNTB1	RFTN2	SNTB1	GSN	SNTB1	CDKN2A
80	ERBB4	EPHA5	ERBB4	S100A6	ERBB4	BDNF
81	ITGA6	LINC00478	ITGA6	FCGRT	ITGA6	NGF
82	VWCE	GAS7	VWCE	NRXN1	VWCE	NTF3
83	FILIP1L	ALDH1A1	FILIP1L	PLP2	FILIP1L	NTF4
84	COLGALT2	CDH6	COLGALT2	PEG10	COLGALT2	CNTF
85	PLP1	MEGF10	PLP1	NDUFA11	PLP1	LIF
86	NR4A2	C10orf11	NR4A2	HLA-A	NR4A2	IL6
87	P2RY1	FIGN	P2RY1	SNHG25	P2RY1	PRL
88	PODXL2	ERBB4	PODXL2	NID1	PODXL2	GH1
89	TBX2	PPAP2A	TBX2	HSPB1	TBX2	LEP
90	ITGA4	FRMD6	ITGA4	LAMA4	ITGA4	IFNA1
91	FAM181B	COL4A1	FAM181B	TSC22D4	FAM181B	IFNA2
92	IL17D	MEF2C	IL17D	TBCA	IL17D	IFNA4
93	PKHD1	CELF2	PKHD1	AAMDC	PKHD1	IFNA5
94	AFAP1L1	COL5A1	AFAP1L1	MGST2	AFAP1L1	IFNA6
95	THY1	CTD-3088G3.8	THY1	COL4A1	THY1	IFNA7
96	LINC00486	GLI3	LINC00486	SOAT1	LINC00486	IFNA8
97	SLC47A1	MAPRE2	SLC47A1	NBEAL1	SLC47A1	IFNA10
98	TGFA	ARHGEF26	TGFA	UQCRQ	TGFA	IFNA13
99	ENPP2	WIPF1	ENPP2	GNG11	ENPP2	IFNA14
100	ST8SIA1	PLA2G4A	ST8SIA1	APOA1	ST8SIA1	IFNA16
101	GAREM1	CDK18	GAREM1	ZFP36L1	GAREM1	IFNA17
102	ITPR3	RP11-436K8.1	ITPR3	GSTK1	ITPR3	IFNA21
103	TP53I11	CSMD1	TP53I11	S100A16	TP53I11	IFNB1
104	GPM6B	KCNMB4	GPM6B	TSPO	GPM6B	IFNG
105	SHC4	ANXA2	SHC4	DAB2	SHC4	OSM
106	ETS1	PMP22	ETS1	CYB5B	ETS1	GDNF
107	SSFA2	DAAM2	SSFA2	NUDT4	SSFA2	ARTN
108	LRRK2	GSN	LRRK2	TIMP1	LRRK2	NRTN
109	NETO2	ANKRD50	NETO2	WWTR1	NETO2	PSPN
110	ST8SIA5	SORBS1	ST8SIA5	SERPINB6	ST8SIA5	EFNA1
111	TFAP2A	RBMS3	TFAP2A	NPC2	TFAP2A	EFNA2
112	HMGA2	ZNF536	HMGA2	SLC15A3	HMGA2	EFNA3
113	TPD52	TSPAN11	TPD52	POR	TPD52	EFNA4
114	QPCT	TNS3	QPCT	SLC25A6	QPCT	EFNA5
115	PTN	RHOJ	PTN	BCHE	PTN	EFNB1
116	KRTAP21-1	HMGA2	KRTAP21-1	EIF3E	KRTAP21-1	EFNB2
117	ADGRG6	NPAS3	ADGRG6	MAPRE2	ADGRG6	EFNB3
118	SHC2	DMD	SHC2	SOX10	SHC2	EGF
119	ELAVL4	PRKCA	ELAVL4	CD9	ELAVL4	NRG1
120	MTRNR2L1	SORCS1	MTRNR2L1	LAMC1	MTRNR2L1	NRG2
121	PLEKHB1	EMP2	PLEKHB1	HBB	PLEKHB1	NRG3
122	PTPRJ	NLGN1	PTPRJ	PNRC1	PTPRJ	NRG4
123	HES6	SASH1	HES6	TPM2	HES6	TGFA
124	FRMD6	HSPA12A	FRMD6	FOXD3-AS1	FRMD6	TGBF1
125	LOC101929583	MCAM	LOC101929583	COMT	LOC101929583	TGFB2
126	SOX2-OT	NOTCH1	SOX2-OT	IGFBP4	SOX2-OT	TGFB3
127	CTSC	SPRED1	CTSC	POSTN	CTSC	GMFB
128	ANOS1	NFIA	ANOS1	LMNA	ANOS1	INS
129	PDLIM1	ITGA1	PDLIM1	ERBB3	PDLIM1	IGF1
130	GRAMD3	COL9A3	GRAMD3	CD59	GRAMD3	VEGFA
131	C1orf21	SRGAP2	C1orf21	TFAP2A	C1orf21	VEGFB
132	GALNT3	COL1A1	GALNT3	CCND3	GALNT3	VEGFC
133	SASH1	WBSCR17	SASH1	CEBPB	SASH1	VEGFD
134	CXCR4	PLEKHA4	CXCR4	HBG1	CXCR4	PGF
135	GPSM1	APP	GPSM1	PPP2R1A	GPSM1	FGF1
136	CDC42EP1	PCDH9	CDC42EP1	DHCR24	CDC42EP1	FGF2
137	PRAG1	TANC1	PRAG1	PHLDA1	PRAG1	FGF3
138	APOBEC3C	HIF3A	APOBEC3C	CNPY2	APOBEC3C	FGF4
139	NR4A1	LGI4	NR4A1	CREM	NR4A1	FGF5
140	DBNDD1	TCF7L1	DBNDD1	NR4A1	DBNDD1	FGF6
141	DFNA5	CTDSPL	DFNA5	JUNB	DFNA5	FGF7
142	CYP27C1	CYP27C1	CYP27C1	KLHDC8B	CYP27C1	FGF8
143	RUBCNL	CDK14	RUBCNL	CNP	RUBCNL	FGF9
144	TRIM53AP	SDK2	TRIM53AP	APP	TRIM53AP	FGF10
145	EPB41L4A	PCSK5	EPB41L4A	CTNNAL1	EPB41L4A	FGF11
146	ZEB2	KIRREL	ZEB2	RDX	ZEB2	FGF12
147	ADD2	NID1	ADD2	C11orf96	ADD2	FGF13
148	CCSER1	ITGA6	CCSER1	COX7A1	CCSER1	FGF14
149	RHBDF1	NLGN4X	RHBDF1	MOXD1	RHBDF1	FGF15
150	KAT7	ARHGEF10	KAT7	PTS	KAT7	FGF16
151	MIR1469	RP11-141M1.3	MIR1469	ERGIC3	MIR1469	FGF17
152	RNF208	CTNNA3	RNF208	PLPP1	RNF208	FGF18
153	FAM95B1	DOCK1	FAM95B1	GLIPR2	FAM95B1	FGF19
154	DDIAS	STOX2	DDIAS	NDN	DDIAS	FGF20
155	PRIMA1	COL1A2	PRIMA1	TSC22D3	PRIMA1	FGF21
156	CORO2B	EPB41L2	CORO2B	SIAH2	CORO2B	FGF22
157	PHLDA3	PLXDC2	PHLDA3	TAX1BP3	PHLDA3	FGF23
158	GSTT2	HSPG2	GSTT2	GSTA4	GSTT2	PDGF
159	MIR6755	ZFP36L1	MIR6755	ID2	MIR6755	ADCYAP1
160	WDR76	PREX1	WDR76	RAB38	WDR76	IL1
161	SLC35F2	CYP7B1	SLC35F2	EMP2	SLC35F2	IL2
162	PLPP1	DOCK5	PLPP1	SORBS2	PLPP1	IL3
163	PHF19	LPCAT2	PHF19	UQCR11	PHF19	IL5
164	CENPV	SPARC	CENPV	ARL5A	CENPV	CXCL8
165	MEF2C	SAMD5	MEF2C	PSAP	MEF2C	CSF1
166	CRYL1	VCL	CRYL1	SERPINH1	CRYL1	CSF2
167	EGFLAM	YAP1	EGFLAM	HSPE1	EGFLAM	CXCL1
168	GSTT2B	PHLPP1	GSTT2B	TXNIP	GSTT2B	SRY
169	TRIM9	CALD1	TRIM9	MRPL33	TRIM9	SOX1
170	DOCK10	EPS8	DOCK10	HES1	DOCK10	SOX2
171	LIMS2	NUDT4	LIMS2	TSPAN7	LIMS2	SOX3
172	FRAT2	ZNF804B	FRAT2	ECH1	FRAT2	SOX4
173	RNF157	CASC15	RNF157	TCEAL8	RNF157	SOX5
174	TMEM229A	ITGA4	TMEM229A	SCPEP1	TMEM229A	SOX6
175	SH3BP1	NCALD	SH3BP1	COL5A2	SH3BP1	SOX7
176	GAS2L3	ANKRD44	GAS2L3	DST	GAS2L3	SOX8
177	39692	METRN	39692	NKAIN4	39692	SOX9
178	STARD13	DISC1	STARD13	SAT1	STARD13	SOX10
179	PPP1R18	IGFBP7	PPP1R18	FKBP1A	PPP1R18	SOX11
180	LOC102723968	FAM134B	LOC102723968	RHOB	LOC102723968	SOX12
181	CRMP1	KANK1	CRMP1	TLN1	CRMP1	SOX13
182	PROX1	NOTCH2	PROX1	LIMA1	PROX1	SOX14
183	ETNK2	FOXO1	ETNK2	VAPA	ETNK2	SOX15
184	SPATA18	PDZD2	SPATA18	ST3GAL4	SPATA18	SOX17
185	CLMN	IGSF11	CLMN	BTG2	CLMN	SOX18
186	MICAL3	RP11-366L20.2	MICAL3	UGCG	MICAL3	SOX21
187	HS3ST3B1	OAF	HS3ST3B1	PRKAR1A	HS3ST3B1	SOX30
188	PPP1R35	LAMC1	PPP1R35	CD164	PPP1R35	POU1F1
189	SNX22	POSTN	SNX22	ITM2C	SNX22	POU2F1
190	CNP	C4orf19	CNP	DLC1	CNP	POU2F2
191	ADAMTS1	LMO4	ADAMTS1	GLRX	ADAMTS1	POU2F3
192	SLC43A3	RARB	SLC43A3	GPM6B	SLC43A3	POU3F1
193	SRM	DLEU7	SRM	CALD1	SRM	POU3F2
194	SHTN1	USP53	SHTN1	TMEM14A	SHTN1	POU3F3
195	TGFBR2	TGFBR3	TGFBR2	CRTAP	TGFBR2	POU3F4
196	FGFRL1	TMEM117	FGFRL1	MRPL24	FGFRL1	POU4F1
197	HID1	GAREM	HID1	CIB1	HID1	POU4F2
198	GPRIN1	PTPN14	GPRIN1	SYNGR1	GPRIN1	POU4F3
199	TRIM14	MAML2	TRIM14	SPTBN1	TRIM14	POU5F1
200	RHOB	VCAN	RHOB	SCP2	RHOB	POU5F1P1
201	PHACTR3	ID3	PHACTR3	MCAM	PHACTR3	POU5F1P3
202	COL19A1	BCHE	COL19A1	SQSTM1	COL19A1	POU5F1P4
203	PITPNC1	ADAMTS9	PITPNC1	HADHB	PITPNC1	POU5F2
204	ADARB1	MAP3K1	ADARB1	NFE2L2	ADARB1	POU6F1
205	ARPC1B	GAB1	ARPC1B	COX17	ARPC1B	POU6F2
206	CD74	RAI14	CD74	FAM3C	CD74	PAX1
207	TMCC2	RP11-307P5.1	TMCC2	RGS2	TMCC2	PAX2
208	PLAT	MEGF9	PLAT	OAZ2	PLAT	PAX3
209	SEMA6B	FRMD5	SEMA6B	IGFBP5	SEMA6B	PAX4
210	CAV2	ASAP2	CAV2	EDNRB	CAV2	PAX5
211	NRXN1	FBN2	NRXN1	HLA-C	NRXN1	PAX6
212	PKD2	FRMD3	PKD2	ACADVL	PKD2	PAX7
213	CNRIP1	HES4	CNRIP1	OXA1L	CNRIP1	PAX8
214	FOXD3	MAP4K4	FOXD3	POLR2G	FOXD3	PAX9
215	FURIN	CREB3L2	FURIN	RAB7A	FURIN	FOXA1
216	FOXD3-AS1	MID1	FOXD3-AS1	IMPDH2	FOXD3-AS1	FOXA2
217	PCAT6	SPTBN1	PCAT6	ZFP36L2	PCAT6	FOXA3
218	ADAMTS15	LPP	ADAMTS15	TMED2	ADAMTS15	FOXB1
219	COL25A1	DNAJC1	COL25A1	MOB4	COL25A1	FOXB2
220	PDZRN3	NR2F2	PDZRN3	ANXA5	PDZRN3	FOXC1
221	PKMYT1	MOB3B	PKMYT1	SDCBP	PKMYT1	FOXC2
222	USP53	CNTN6	USP53	SDHC	USP53	FOXD1
223	HOOK1	RGL1	HOOK1	DNAJC1	HOOK1	FOXD2
224	TPK1	ABCD3	TPK1	EIF5B	TPK1	FOXD3
225	LRRC4	DAB1	LRRC4	PELO	LRRC4	FOXD4
226	ADAMTS4	TIMP3	ADAMTS4	ECI2	ADAMTS4	FOXD5
227	LRRC8B	MOXD1	LRRC8B	SYPL1	LRRC8B	FOXE1
228	PLS3	UTRN	PLS3	ATF4	PLS3	FOXE2
229	NFATC2	CRISPLD1	NFATC2	H2AFJ	NFATC2	FOXE3
230	CADM4	LTBP1	CADM4	PEG3	CADM4	FOXF1
231	ST3GAL6	NHS	ST3GAL6	FOSB	ST3GAL6	FOXF2
232	AATF	STK3	AATF	RUVBL2	AATF	FOXG1
233	BCAR3	GPR98	BCAR3	PTP4A1	BCAR3	FOXH1
234	ADGRG1	GRIK3	ADGRG1	SYAP1	ADGRG1	FOXI1
235	PCDH11X	RCBTB2	PCDH11X	CTNNB1	PCDH11X	FOXI2
236	MYD88	SIPA1L1	MYD88	KLF6	MYD88	FOXJ1
237	KIF21B	MIR181A1HG	KIF21B	HLA-B	KIF21B	FOXJ2
238	LPAR6	FRAS1	LPAR6	COX14	LPAR6	FOXJ3
239	COL11A2	LAMB1	COL11A2	ATP1B3	COL11A2	FOXK1
240	ZNF37BP	PON2	ZNF37BP	SERTAD1	ZNF37BP	FOXK2
241	GDNF-AS1	LRRC7	GDNF-AS1	TTYH1	GDNF-AS1	FOXM1
242	CDCA7	VIM	CDCA7	CYR61	CDCA7	FOXN1
243	CPED1	ELF1	CPED1	PTPRZ1	CPED1	FOXN2
244	TNFRSF19	PAG1	TNFRSF19	MIA	TNFRSF19	FOXN3
245	TEAD4	OSBPL10	TEAD4	CRABP1	TEAD4	FOXN4
246	CLSPN	DOK6	CLSPN	INSC	CLSPN	FOXO1
247	AFAP1L2	NR6A1	AFAP1L2	SOX2	AFAP1L2	FOXO3
248	LPCAT2	DIP2B	LPCAT2	VCAN	LPCAT2	FOXO4
249	ROPN1B	MARCKS	ROPN1B	TRPM3	ROPN1B	FOXO6
250	SLC45A3	CHRM3	SLC45A3	ZEB2	SLC45A3	FOXP1
251	NEK6	CAMK2D	NEK6	CTGF	NEK6	FOXP2
252	NPL	ATF7IP2	NPL	COL9A3	NPL	FOXP3
253	TIAM1	CNN3	TIAM1	LMO4	TIAM1	FOXP4
254	SCN9A	INPP4B	SCN9A	NR2F2	SCN9A	FOXQ1
255	LHFPL2	COL19A1	LHFPL2	LAMP5	LHFPL2	FOXR1
256	NTM	SPATA6	NTM	FOXD3	NTM	FOXR2
257	CHST14	KAT2B	CHST14	CNN3	CHST14	TBXT
258	LAMB1	LIMA1	LAMB1	VIM	LAMB1	TBR1
259	PLK2	RAP1A	PLK2	SLC35F1	PLK2	TBX1
260	DNAH10	CHD7	DNAH10	CDH6	DNAH10	TBX2
261	NRTN	APOE	NRTN	SEMA3B	NRTN	TBX3
262	ATP8A1	HS6ST3	ATP8A1	ID3	ATP8A1	TBX4
263	MCM10	EVI5	MCM10	PLEKHA4	MCM10	TBX5
264	PHLDA1	COL18A1	PHLDA1	COL4A2	PHLDA1	TBX6
265	GNPDA1	ROR1	GNPDA1	EEF1D	GNPDA1	TBX10
266	RAB7B	TOM1L2	RAB7B	METRN	RAB7B	TBX15
267	TMEM243	RALGPS2	TMEM243	ADGRG6	TMEM243	TBX18
268	MTA2	B2M	MTA2	CD99	MTA2	TBX19
269	NIT2	LEPREL1	NIT2	KCTD12	NIT2	TBX20
270	SNHG15	ATP2B1	SNHG15	COL2A1	SNHG15	TBX21
271	CDKN1A	ADAMTS6	CDKN1A	PLS3	CDKN1A	TBX22
272	SLC1A5	ACTB	SLC1A5	MDFI	SLC1A5	HOXA1
273	LINC00327	PDZRN4	LINC00327	LPL	LINC00327	HOXA2
274	TCF7L2	SOX6	TCF7L2	GAS7	TCF7L2	HOXA3
275	MTRNR2L10	PRKG1	MTRNR2L10	CMTM5	MTRNR2L10	HOXA4
276	SPP1	ADAM12	SPP1	RASSF4	SPP1	HOXA5
277	PRKCI	RP11-152K4.2	PRKCI	COL18A1	PRKCI	HOXA6
278	LSAMP	GRID2	LSAMP	RARRES2	LSAMP	HOXA7
279	ANKRD20A11P	PLS3	ANKRD20A11P	SLITRK2	ANKRD20A11P	HOXA8
280	ALDH18A1	ITGB5	ALDH18A1	HMGA2	ALDH18A1	HOXA9
281	DLC1	TMEM2	DLC1	PMP2	DLC1	HOXA10
282	TMEM229B	VCAN-AS1	TMEM229B	NPR3	TMEM229B	HOXA11
283	NT5DC2	HMCN1	NT5DC2	FABP7	NT5DC2	HOXA12
284	C15orf39	KIAA1755	C15orf39	CDC42EP5	C15orf39	HOXA13
285	SEMA3D	LMO3	SEMA3D	MYL12A	SEMA3D	HOXB1
286	COL9A1	RP11-413B19.2	COL9A1	MEGF10	COL9A1	HOXB2
287	ULK4P2	ETS1	ULK4P2	QKI	ULK4P2	HOXB3
288	E2F1	STXBP6	E2F1	TGFBR2	E2F1	HOXB4
289	NID1	COL20A1	NID1	PPFIBP1	NID1	HOXB5
290	UBL3	AC090673.2	UBL3	COL20A1	UBL3	HOXB6
291	LITAF	SGK223	LITAF	S100A11	LITAF	HOXB7
292	C11orf84	ARAP2	C11orf84	LINC01198	C11orf84	HOXB8
293	TAF4B	RP11-366L20.3	TAF4B	GFRA1	TAF4B	HOXB9
294	UACA	PARD3	UACA	ATP1A2	UACA	HOXB13
295	GNG2	MYO10	GNG2	NOTCH1	GNG2	HOXC4
296	ITGAV	TGFB2	ITGAV	TPBG	ITGAV	HOXC5
297	KIAA1755	PRICKLE2	KIAA1755	RHOJ	KIAA1755	HOXC6
298	ELF4	PTPN13	ELF4	BDH2	ELF4	HOXC8
299	SBNO2	PHLDB2	SBNO2	NKAIN3	SBNO2	HOXC9
300	VLDLR	SOX13	VLDLR	FAM198B	VLDLR	HOXC10
301	FIGN	LSAMP	FIGN	AHR	FIGN	HOXC11
302	LOC101928307	FOLH1	LOC101928307	FILIP1L	LOC101928307	HOXC12
303	GALNT10	ID4	GALNT10	CDC42EP1	GALNT10	HOXC13
304	ETV1	WLS	ETV1	DHRS3	ETV1	HOXD1
305	BLOC1S1	KIF13B	BLOC1S1	RAB31	BLOC1S1	HOXD3
306	ULK4P3	DLGAP1	ULK4P3	SLITRK6	ULK4P3	HOXD4
307	PRDM16	CNTN4	PRDM16	PON2	PRDM16	HOXD8
308	SPTBN1	PDE7B	SPTBN1	CNN2	SPTBN1	HOXD9
309	GPR37	GNG12-AS1	GPR37	SERF2	GPR37	HOXD10
310	ZCCHC17	RASGEF1C	ZCCHC17	IGFBP2	ZCCHC17	HOXD11
311	CDK18	CPED1	CDK18	MAL	CDK18	HOXD12
312	ARHGEF10	SSFA2	ARHGEF10	ANXA1	ARHGEF10	HOXD13
313	CRTAP	GFRA1	CRTAP	MGST1	CRTAP	RUNX1
314	PDE1C	EFNB2	PDE1C	PDPN	PDE1C	RUNX2
315	BCL6	SLITRK6	BCL6	ID4	BCL6	RUNX3
316	GAMT	COL11A1	GAMT	PRKCDBP	GAMT	E2F1
317	LOC105370994	FRMD4A	LOC105370994	PRSS23	LOC105370994	E2F2
318	FRMD6-AS1	HS3ST4	FRMD6-AS1	MFGE8	FRMD6-AS1	E2F3
319	RNASEH2B	GPC6	RNASEH2B	JUN	RNASEH2B	E2F4
320	MTSS1L	PDZRN3	MTSS1L	TNS3	MTSS1L	E2F5
321	MPG	FGD4	MPG	RAB32	MPG	E2F6
322	UCP2	NGFR	UCP2	SASH1	UCP2	E2F7
323	U2AF2	IL1RAP	U2AF2	NGFR	U2AF2	E2F8
324	PRSS12	GULP1	PRSS12	HEY2	PRSS12	EHF
325	GATM	COL2A1	GATM	ETS1	GATM	ELF1
326	PLXNA4	ITGA2	PLXNA4	FSTL1	PLXNA4	ELF2
327	AKT1	PLEKHG1	AKT1	EPB41L2	AKT1	ELF3
328	CDK4	PDE4B	CDK4	TEAD2	CDK4	ELF4
329	GULP1	TNIK	GULP1	RAB13	GULP1	ELF5
330	ARHGEF16	RP11-945C19.4	ARHGEF16	PDLIM1	ARHGEF16	ELK1
331	KCNE1B	C3orf70	KCNE1B	MYO10	KCNE1B	ELK3
332	CCDC3	FAM13A	CCDC3	TSPAN15	CCDC3	ELK4
333	TEX15	AC008937.2	TEX15	FRMD6	TEX15	ERF
334	OVOS2	LGR4	OVOS2	WLS	OVOS2	ERG
335	ELOVL2	ZNF521	ELOVL2	ZCCHC24	ELOVL2	ETS1
336	CMTM5	PRKD1	CMTM5	TGIF1	CMTM5	ETS2
337	NCAM2	PHLDB1	NCAM2	HOXB9	NCAM2	ETV1
338	MIR6165	COL23A1	MIR6165	CRISPLD1	MIR6165	ETV2
339	RGS10	FBN3	RGS10	BACE2	RGS10	ETV3
340	SPDYE2B	LHFPL2	SPDYE2B	CD82	SPDYE2B	ETV3L
341	LINC00987	ACSS3	LINC00987	AFAP1L2	LINC00987	ETV4
342	PLPPR3	OXR1	PLPPR3	PLIN3	PLPPR3	ETV5
343	USP44	ST6GALNAC3	USP44	FBN2	USP44	ETV6
344	LIPH	ST8SIA5	LIPH	FLNA	LIPH	ETV7
345	MTUS1	CDC14A	MTUS1	MBP	MTUS1	FEV
346	RPL23P8	KCNIP1	RPL23P8	MMP2	RPL23P8	FLI1
347	MIF	UST	MIF	ANGPTL4	MIF	GABPA
348	SAMD4A	TBX2	SAMD4A	PRIMA1	SAMD4A	SPDEF
349	WLS	TMTC2	WLS	WBP5	WLS	SPIB
350	CPXM1	B4GALT6	CPXM1	TGFBR3	CPXM1	SPIC
351	LOC100130950	GRIK2	LOC100130950	OSTC	LOC100130950	SPI1
352	ISCA1	AFF2	ISCA1	FN1	ISCA1	FOS
353	UBASH3B	MMP17	UBASH3B	ITGA6	UBASH3B	FOSB
354	GUSBP3	RP11-649G15.2	GUSBP3	RAB20	GUSBP3	FOSL2
355	FNDC3B	ST5	FNDC3B	HSPD1	FNDC3B	JUN
356	ECE1	LIMD1	ECE1	SAMHD1	ECE1	JUNB
357	DOCK8	TAOK3	DOCK8	MARCKS	DOCK8	JUND
358	SEC14L6	ADAMTSL1	SEC14L6	FKBP10	SEC14L6
359	KLHL4	HOXB3	KLHL4	SNCG	KLHL4
360	TCF4	UACA	TCF4	GYPC	TCF4
361	LGALS3BP	NOX4	LGALS3BP	ADAM23	LGALS3BP
362	METRNL	SUCLG2	METRNL	TRIP6	METRNL
363	C14orf159	FKBP10	C14orf159	PDK4	C14orf159
364	LOC101929072	CACHD1	LOC101929072	AHNAK	LOC101929072
365	SIPA1L3	FBN1	SIPA1L3	SYNE1	SIPA1L3
366	AFF3	RP11-696N14.1	AFF3	HSPG2	AFF3
367	SIX4	NRIP1	SIX4	FOS	SIX4
368	COL18A1	PEAK1	COL18A1	ARHGAP18	COL18A1
369	LOC102724623	FAM3C	LOC102724623	LPAR6	LOC102724623
370	ZNF432	RP11-444D3.1	ZNF432	SPRED1	ZNF432
371	FGD6	CTD-2647L4.1	FGD6	TPT1	FGD6
372	ODC1	DPY19L3	ODC1	GADD45B	ODC1
373	TCN2	TCF7L2	TCN2	ADAMTS6	TCN2
374	PRDX1	FLNA	PRDX1	TNFRSF1A	PRDX1
375	IFITM3	RBMS2	IFITM3	LINC00400	IFITM3
376	LYN	CEP112	LYN	CMTM7	LYN
377	FRZB	RAP1GDS1	FRZB	COTL1	FRZB
378	SLC39A7	MVB12B	SLC39A7	COL11A1	SLC39A7
379	EFCAB6	ARHGEF35	EFCAB6	LITAF	EFCAB6
380	HOXC4	ERBB2IP	HOXC4	CD83	HOXC4
381	C3orf58	ETV6	C3orf58	VCL	C3orf58
382	IL27RA	TRPS1	IL27RA	RBMS3-AS3	IL27RA
383	HOXC8	MIR181A2HG	HOXC8	MYLIP	HOXC8
384	NEXN	PTPRM	NEXN	NRXN3	NEXN
385	PLXDC2	ANTXR1	PLXDC2	SSR2	PLXDC2
386	KCP	UBL3	KCP	YBX3	KCP
387	FMN1	PTK2	FMN1	NDUFA4	FMN1
388	LOC101929777	RP11-37B2.1	LOC101929777	PDIA6	LOC101929777
389	FMR1	MAP4K5	FMR1	MXRA8	FMR1
390	MIR4651	RAD51B	MIR4651	C4orf3	MIR4651
391	ARHGAP24	RNF130	ARHGAP24	C10orf11	ARHGAP24
392	ABR	CHST11	ABR	SOCS3	ABR
393	NR2C1	NPR3	NR2C1	ZNF503	NR2C1
394	KCNN3	KCNK2	KCNN3	IGF2BP2	KCNN3
395	GPR162	LPHN2	GPR162	AXL	GPR162
396	DPYSL2	OSBPL1A	DPYSL2	IRF1	DPYSL2
397	AVEN	LRCH1	AVEN	SPG20	AVEN
398	ZNF252P-AS1	AKAP13	ZNF252P-AS1	SCN7A	ZNF252P-AS1
399	MAPK10	NCAM2	MAPK10	ANKRD50	MAPK10
400	FER1L4	RAPGEF2	FER1L4	BTG1	FER1L4
401	LAMB2	GTDC1	LAMB2	SEPP1	LAMB2
402	NAALADL2	ST6GAL1	NAALADL2	BGN	NAALADL2
403	TNFRSF25	BICC1	TNFRSF25	LAMB2	TNFRSF25
404	TENM3	ARNT2	TENM3	GPX8	TENM3
405	ITGB8	LINC01057	ITGB8	TPD52L1	ITGB8
406	CTNNA2	DDAH1	CTNNA2	TMEM47	CTNNA2
407	MECOM	DOCK10	MECOM	EFEMP2	MECOM
408	MRPS6	TENM3	MRPS6	SPRY2	MRPS6
409	PKDCC	PALLD	PKDCC	AIF1L	PKDCC
410	WBP1L	LRCH3	WBP1L	TSPAN6	WBP1L
411	SFRP2	KIAA0922	SFRP2	HMG20B	SFRP2
412	CA11	MICAL3	CA11	RAB34	CA11
413	PPARGC1A	FOXP2	PPARGC1A	CHL1	PPARGC1A
414	SEMA6A	KIF13A	SEMA6A	S100A4	SEMA6A
415	HFM1	DNAH14	HFM1	RBPMS	HFM1
416	CDH24	AFF3	CDH24	LTBP1	CDH24
417	CPE	RBPMS	CPE	LDHB	CPE
418	ROR2	MEF2C-AS1	ROR2	ENDOD1	ROR2
419	PDZD2	VWA8	PDZD2	DLX2	PDZD2
420	CLIP2	ARHGEF12	CLIP2	ISG15	CLIP2
421	SLC22A23	USP25	SLC22A23	VPREB3	SLC22A23
422	LOC101927480	MED12L	LOC101927480	HDDC2	LOC101927480
423	IER5	ARHGAP5	IER5	PPIF	IER5
424	IER5L	PRICKLE1	IER5L	REST	IER5L
425	HOXA5	PCDH7	HOXA5	P4HA1	HOXA5
426	BEX1	PTPN12	BEX1	TMEM258	BEX1
427	EMID1	SVIL	EMID1	MC2R	EMID1
428	COMMD1	KLF12	COMMD1	ITGAV	COMMD1
429	RYR1	IMMP2L	RYR1	KLF2	RYR1
430	CASC15	PLCB4	CASC15	GLTP	CASC15
431	SPHK1	TFDP2	SPHK1	TMEM98	SPHK1
432	ADGRE5	GPC3	ADGRE5	LAMB1	ADGRE5
433	ESRRG	CDC73	ESRRG	GJA1	ESRRG
434	KCNH2	HIVEP1	KCNH2	COL14A1	KCNH2
435	HOXA-AS3	ST8SIA1	HOXA-AS3	RRBP1	HOXA-AS3
436	BTBD17	RP11-123O10.4	BTBD17	DUSP6	BTBD17
437	WFIKKN1	MMP16	WFIKKN1	PPIB	WFIKKN1
438	DTNA	FREM1	DTNA	RNF130	DTNA
439	ARHGAP10	BACH1	ARHGAP10	MIR202HG	ARHGAP10
440	FGFR1	LMCD1-AS1	FGFR1	MDFIC	FGFR1
441	SULT1A1	TLE4	SULT1A1	ITM2A	SULT1A1
442	NFATC4	KHDRBS2	NFATC4	NR2F1	NFATC4
443	GXYLT2	ENOX1	GXYLT2	IRS1	GXYLT2
444	RADIL	ARHGAP11B	RADIL	HLA-E	RADIL
445	ALCAM	C2orf48	ALCAM	PLAGL1	ALCAM
446	PALLD	KIF18B	PALLD	SPRY1	PALLD
447	CACHD1	C21orf58	CACHD1	ZNF536	CACHD1
448	MUM1L1	MELK	MUM1L1	CREB3L2	MUM1L1
449	EDNRA	CDC25C	EDNRA	TNXB	EDNRA
450	PCDHB14	DIAPH3	PCDHB14	IER2	PCDHB14
451	MTMR11	CENPE	MTMR11	TCF7L2	MTMR11
452	MIR325HG	KIF4A	MIR325HG	SLC23A2	MIR325HG
453	FAM227A	KIF11	FAM227A	CALU	FAM227A
454	MYO7A	CENPK	MYO7A	XKR4	MYO7A
455	IGSF11	BUB1B	IGSF11	IL11RA	IGSF11
456	CCDC85C	LINC00669	CCDC85C	EEF1A1	CCDC85C
457	UNC5C	ASPM	UNC5C	PRDX6	UNC5C
458	ST6GALNAC5	RTKN2	ST6GALNAC5	CLRN1	ST6GALNAC5
459	CTSB	POLQ	CTSB	ADI1	CTSB
460	ZNF467	NDC80	ZNF467	HOTAIRM1	ZNF467
461	EMILIN1	MYBL1	EMILIN1	PHGDH	EMILIN1
462	PLOD1	CASC5	PLOD1	PHACTR2	PLOD1
463	DGKD	DEPDC1B	DGKD	CYTL1	DGKD
464	GLCE	BRIP1	GLCE	RBM47	GLCE
465	SSBP2	CIT	SSBP2	P3H2	SSBP2
466	VCL	GTSE1	VCL	DDIT4	VCL
467	PLCD4	IQGAP3	PLCD4	BCL2L12	PLCD4
468	TNFRSF21	FANCB	TNFRSF21	BAMBI	TNFRSF21
469	CTGF	ECT2	CTGF	P4HB	CTGF
470	SLC5A3	ARHGAP11A	SLC5A3	RCN1	SLC5A3
471	CDK2AP1	KIF15	CDK2AP1	DBI	CDK2AP1
472	HIVEP2	SGOL1	HIVEP2	GRB14	HIVEP2
473	ARL4A	CENPF	ARL4A	LUZP1	ARL4A
474	MRC2	GLRA2	MRC2	FAM126A	MRC2
475	ARHGAP28	PARPBP	ARHGAP28	HSP90B1	ARHGAP28
476	FBN1	CCDC150	FBN1	COL6A2	FBN1
477	PLA2G3	TOP2A	PLA2G3	HOPX	PLA2G3
478	ANTXR1	TACC3	ANTXR1	PTN	ANTXR1
479	CXXC4	FANCI	CXXC4	C8orf4	CXXC4
480	DACH2	NCAPG	DACH2	EGR1	DACH2
481	MIR4751	CDCA2	MIR4751	SHMT1	MIR4751
482	HOXA11	CENPI	HOXA11	TJP1	HOXA11
483	GREB1L	STIL	GREB1L	FAM195A	GREB1L
484	APCDD1	TPX2	APCDD1	NOTCH2	APCDD1
485	SSC4D	SGOL2	SSC4D	EGFLAM	SSC4D
486	ARF5	RP11-120D5.1	ARF5	MATN2	ARF5
487	CELSR1	GAS2L3	CELSR1	CYP17A1	CELSR1
488	SP5	ANLN	SP5	LMCD1	SP5
489	BGN	KIF18A	BGN	SHFM1	BGN
490	SCUBE1	AURKB	SCUBE1	2020-09-02	SCUBE1
491	SLC2A3	KIF2C	SLC2A3	TRAM1	SLC2A3
492	TAGLN	SPC25	TAGLN	CELF2	TAGLN
493	DOCK3	MIS18BP1	DOCK3	DAAM2	DOCK3
494	SLC7A8	KIF20B	SLC7A8	KIF13B	SLC7A8
495	ZNF703	BUB1	ZNF703	EVA1B	ZNF703
496	ACSBG1	BLM	ACSBG1	CMTM3	ACSBG1
497	CREG1	KIFC1	CREG1	VGLL4	CREG1
498	PALM3	SMC4	PALM3	ARRDC3	PALM3
499	HEPH	KIF23	HEPH	CTDSPL	HEPH
500	LUM	NCAPD2	LUM	DECR1	LUM
501	LOC100289279	KIF14	LOC100289279	DMD	LOC100289279
502	TRIM8	EZH2	TRIM8	SPP1	TRIM8
503	AJUBA	AC004158.2	AJUBA	LDLR	AJUBA
504	TMEM255A	BRCA2	TMEM255A	QPRT	TMEM255A
505	SLC2A14	MKI67	SLC2A14	KLF4	SLC2A14
506	SORL1	AP001347.6	SORL1	MYH7B	SORL1
507	CAMK2A	NDE1	CAMK2A	SAT2	CAMK2A
508	LOC100008587	BARD1	LOC100008587	HOXA5	LOC100008587
509	RELN	RP1-167A14.2	RELN	ADGRV1	RELN
510	AHNAK	PIF1	AHNAK	FIGN	AHNAK
511	GPRC5C	NUSAP1	GPRC5C	LPP	GPRC5C
512	ZNF423	GINS1	ZNF423	LIMCH1	ZNF423
513	ISLR	SPATA5	ISLR	SSR3	ISLR
514	ZNF521	KNTC1	ZNF521	OSR2	ZNF521
515	CDC42EP4	NUF2	CDC42EP4	EPHX1	CDC42EP4
516	SLC7A11	RAD51AP1	SLC7A11	TMBIM6	SLC7A11
517	SOX9	RAD54B	SOX9	CYP11B1	SOX9
518	ZC3H12B	PRIM2	ZC3H12B	CPB1	ZC3H12B
519	ZFPM2	MMS22L	ZFPM2	ACSS1	ZFPM2
520	CD4	CEP128	CD4	GSTO1	CD4
521	MSX1	DNA2	MSX1	TGFB1I1	MSX1
522	FAT1	DLGAP5	FAT1	CAST	FAT1
523	SLC20A2	MXD3	SLC20A2	GALM	SLC20A2
524	MDGA1	MDFIC	MDGA1	PAPSS2	MDGA1
525	GDF10	BRCA1	GDF10	CTNNA1	GDF10
526	IER3	CTC-260E6.6	IER3	PMEPA1	IER3
527	PDGFRB	FANCA	PDGFRB	VMP1	PDGFRB
528	HYDIN	ATAD2	HYDIN	SIGLEC11	HYDIN
529	INA	CENPJ	INA	SFRP1	INA
530	MAP1B	ITGB3BP	MAP1B	MCF2	MAP1B
531	PLAU	APOLD1	PLAU	MESDC2	PLAU
532	SLC44A5	LMNB1	SLC44A5	TMED9	SLC44A5
533	WNK2	CDK1	WNK2	LIMS1	WNK2
534	PRRT2	CCDC18	PRRT2	PVRL2	PRRT2
535	TUBB4A	TMPO	TUBB4A	GSDMD	TUBB4A
536	TMEM132B	VRK1	TMEM132B	C1orf198	TMEM132B
537	SNAI2	WDHD1	SNAI2	ZNF275	SNAI2
538	PGM1	PRC1	PGM1	CMTM8	PGM1
539	MIR4640	NCAPG2	MIR4640	CUEDC2	MIR4640
540	PLLP	MTBP	PLLP	GIPC2	PLLP
541	VGF	PRELID2	VGF	ABCA1	VGF
542	RGS5	CDK5RAP2	RGS5	HSPA1B	RGS5
543	LPAR1	ENC1	LPAR1	LDHA	LPAR1
544	LOC102546299	AC011043.1	LOC102546299	ASPH	LOC102546299
545	AKR1C1	XRCC4	AKR1C1	SNAP23	AKR1C1
546	ALPL	ITGAV	ALPL	PPP1R15A	ALPL
547	NEBL	RTTN	NEBL	NOB1	NEBL
548	SLC2A1	CEP135	SLC2A1	FAM162A	SLC2A1
549	ATP1A2	ZNF730	ATP1A2	BBX	ATP1A2
550	MAATS1	E2F3	MAATS1	SCARB2	MAATS1
551	TUBB2A	SCLT1	TUBB2A	MTAP	TUBB2A
552	CNTNAP3	HUNK	CNTNAP3	NDUFC1	CNTNAP3
553	FRMD3	EFCAB11	FRMD3	MRPL50	FRMD3
554	ADGRV1	G2E3	ADGRV1	AGRN	ADGRV1
555	SLC4A8	CKAP2	SLC4A8	SNX5	SLC4A8
556	MXRA8	SYNE2	MXRA8	PRKCA	MXRA8
557	PAK3	RFC3	PAK3	RCBTB2	PAK3
558	NQO1	RBL1	NQO1	DAP	NQO1
559	CREB3L1	MIR503HG	CREB3L1	MAN1A1	CREB3L1
560	PLD5	HELLS	PLD5	VAMP5	PLD5
561	DNAJC15	RP11-222A11.1	DNAJC15	MBNL2	DNAJC15
562	TPM1	CENPP	TPM1	PCGF5	TPM1
563	BMP4	C4orf21	BMP4	SDHD	BMP4
564	NRCAM	POLA1	NRCAM	ARID5B	NRCAM
565	GLI2	SKA2	GLI2	ACTN4	GLI2
566	UST	PKD2	UST	ZG16B	UST
567	LAMC3	CEP192	LAMC3	GRAMD1B	LAMC3
568	PTPRG	CNTLN	PTPRG	SSFA2	PTPRG
569	SLC12A7	FBXL7	SLC12A7	AMHR2	SLC12A7
570	FAM84A	DGKH	FAM84A	C7	FAM84A
571	CYP46A1	PKP4	CYP46A1	2020-09-07	CYP46A1
572	HOXD8	HP1BP3	HOXD8	SERP1	HOXD8
573	RCSD1	MIR4435-1HG	RCSD1	HSPA12A	RCSD1
574	LINC00367	SIPA1L2	LINC00367	RAP1A	LINC00367
575	SEMA5A	TRAF3IP2-AS1	SEMA5A	ABHD2	SEMA5A
576	NRG1	PACSIN2	NRG1	DNAJB4	NRG1
577	TENM2	CEP70	TENM2	NOSTRIN	TENM2
578	SCN8A	NUCKS1	SCN8A	CCDC8	SCN8A
579	NOVA2	CKAP5	NOVA2	MRAP	NOVA2
580	UGT8	WHSC1	UGT8	SLC39A10	UGT8
581	AKR1C2	CCDC14	AKR1C2	FLRT3	AKR1C2
582	LRRN1	PDE4D	LRRN1	BIRC7	LRRN1
583	CDKN1C	PTN	CDKN1C	MPG	CDKN1C
584	SDC2	GPSM2	SDC2	ENO1	SDC2
585	SPOCK1	WDPCP	SPOCK1	ROMO1	SPOCK1
586	BMP7		BMP7	CASP9	BMP7
587	BMP5		BMP5	IKBKAP	BMP5
588	COL4A6		COL4A6	APRT	COL4A6
589	PTPRD		PTPRD	MAP3K1	PTPRD
590	EGFR		EGFR	PHLDA3	EGFR
591	MYOF		MYOF	TXN2	MYOF
592	HDC		HDC	DNAJB1	HDC
593	EPHB1		EPHB1	DPP10-AS1	EPHB1
594	KIAA1522		KIAA1522	DPM3	KIAA1522
595	MPPED2		MPPED2	PBXIP1	MPPED2
596	TMEM132C		TMEM132C	REXO2	TMEM132C
597	MYO16		MYO16	MLEC	MYO16
598	ANXA1		ANXA1	2020-09-15	ANXA1
599	RASL11B		RASL11B	HES4	RASL11B
600	RGS16		RGS16	CSRP1	RGS16
601	PNMA2		PNMA2	PLXDC2	PNMA2
602	FLRT2		FLRT2	GULP1	FLRT2
603	FAT3		FAT3	PRPF4B	FAT3
604	TENM4		TENM4	CLNS1A	TENM4
605	MIR6872		MIR6872	IL6ST	MIR6872
606	PLEKHA6		PLEKHA6	ZFAND5	PLEKHA6
607	MIR6843		MIR6843	SKAP2	MIR6843
608	SALL1		SALL1	FBL	SALL1
609	CLMP		CLMP	SERBP1	CLMP
610	HOXB-AS3		HOXB-AS3	PKN2	HOXB-AS3
611	MEST		MEST	NPM3	MEST
612	ID2		ID2	TPT1-AS1	ID2
613	NKD1		NKD1	ALAS1	NKD1
614	DSEL		DSEL	SERPINA5	DSEL
615	BOC		BOC	ELOVL1	BOC
616	IRX5		IRX5	SLC16A1	IRX5
617	CXADR		CXADR	HEY1	CXADR
618	MIAT		MIAT	HIF3A	MIAT
619	ABCA1		ABCA1	WSB1	ABCA1
620	RASGRP1		RASGRP1	CCND2	RASGRP1
621	S1PR3		S1PR3	DDIT3	S1PR3
622	CDON		CDON	ALDH9A1	CDON
623	MAPK4		MAPK4	PRCP	MAPK4
624	EYA4		EYA4	CDC73	EYA4
625	PCOLCE		PCOLCE	TMEM256	PCOLCE
626	PAPLN		PAPLN	LEPROT	PAPLN
627	ILDR2		ILDR2	PRR13	ILDR2
628	TTC29		TTC29	STK19	TTC29
629	ID3		ID3	GRPEL1	ID3
630	WNT5A		WNT5A	C8orf33	WNT5A
631	HOXD4		HOXD4	NR5A1	HOXD4
632	PCDH7		PCDH7	LINC00998	PCDH7
633	CSRP2		CSRP2	CADM4	CSRP2
634	BRINP2		BRINP2	PACSIN3	BRINP2
635	SOX1		SOX1	MRPS28	SOX1
636	GABRG3		GABRG3	PSMB8	GABRG3
637	TBX15		TBX15	TSPAN18	TBX15
638	DSP		DSP	CTSA	DSP
639	ZIC3		ZIC3	DCTD	ZIC3
640	MIR7704		MIR7704	BZW2	MIR7704
641	RGMA		RGMA	PRDX3	RGMA
642	FAM43A		FAM43A	OXR1	FAM43A
643	MYADM		MYADM	RND3	MYADM
644	HOXD3		HOXD3	COA4	HOXD3
645	SLIT2		SLIT2	GPC1	SLIT2
646	FGFR2		FGFR2	LSR	FGFR2
647	NELL2		NELL2	SMAD5	NELL2
648	NEFL		NEFL	LSM14A	NEFL
649	ADRA2C		ADRA2C	C10orf10	ADRA2C
650	ASTN1		ASTN1	CTSC	ASTN1
651	DACH1		DACH1	MAFF	DACH1
652	CRB2		CRB2	UBL3	CRB2
653	CGNL1		CGNL1	PUF60	CGNL1
654	IGFBP5		IGFBP5	BCL7C	IGFBP5
655	SALL3		SALL3	ALDH1A2	SALL3
656	SEMA3A		SEMA3A	DUSP5	SEMA3A
657	CCBE1		CCBE1	MCL1	CCBE1
658	PRICKLE1		PRICKLE1	TP53I13	PRICKLE1
659	HHIP		HHIP	FGF12	HHIP
660	LAMA2		LAMA2	REEP6	LAMA2
661	AMPH		AMPH	AKAP7	AMPH
662	HAGLR		HAGLR	HOXB7	HAGLR
663	GPC3		GPC3	PHB	GPC3
664	IRX3		IRX3	ENO3	IRX3
665	OLFM3		OLFM3	DFNB31	OLFM3
666	NCKAP5		NCKAP5	LMAN1	NCKAP5
667	SLCO5A1		SLCO5A1	C14orf1	SLCO5A1
668	FBLN2		FBLN2	SLC39A1	FBLN2
669	ARL4C		ARL4C	GNAI2	ARL4C
670	POU3F2		POU3F2	ING2	POU3F2
671	EPHA4		EPHA4	TAPBP	EPHA4
672	SP6		SP6	DHRS4L2	SP6
673	FGF12		FGF12	TMEM123	FGF12
674	MIR3606		MIR3606	SLC16A9	MIR3606
675	SULF1		SULF1	PSAT1	SULF1
676	COL1A2		COL1A2	PSME2	COL1A2
677	HOXD9		HOXD9	GALNT2	HOXD9
678	SLC1A3		SLC1A3	PLTP	SLC1A3
679	ZIC4		ZIC4	TEX264	ZIC4
680	FOXB1		FOXB1	SLC26A2	FOXB1
681	ASS1		ASS1	C14orf119	ASS1
682	COL6A3		COL6A3	UBXN2A	COL6A3
683	HOXD11		HOXD11	SGCE	HOXD11
684	ATP6V1B1		ATP6V1B1	CTDSP2	ATP6V1B1
685	ABCD2		ABCD2	CD46	ABCD2
686	GRM7-AS3		GRM7-AS3	RORA	GRM7-AS3
687	ZIC5		ZIC5	DNPH1	ZIC5
688	NEFM		NEFM	GPC6	NEFM
689	STC1		STC1	NFKBIA	STC1
690	CYP1B1		CYP1B1	CMTM6	CYP1B1
691	HOXD10		HOXD10	PPP1R14A	HOXD10
692	CDH11		CDH11	ITGB1	CDH11
693	ZIC2		ZIC2	ID1	ZIC2
694	ZIC1		ZIC1	SIVA1	ZIC1
				NQO2
				PHF20L1
				RWDD4
				SCD5
				MRPL10
				SECISBP2L
				BRE
				TMEM97
				TMED10
				SH3BGRL
				SFT2D1
				ARL14EP
				LAPTM4B
				RSL1D1
				FAM210B
				FAM133B
				IVD
				STOML2
				WASF2
				INSR
				PTK2
				RFXANK
				ELAVL1
				HSPA1A
				TMEM245
				RBBP7
				SLC25A37
				FARP1
				NUCB1
				SURF6
				CLEC11A
				NOP16
				CCDC47
				RBBP6
				FRMD4A
				PLA2G16
				HSPA9
				ELP5
				FADS2
				HIBADH
				ATF3
				CCS
				AC020571.3
				GIPC1
				GTPBP4
				CHMP4A
				GLUL
				C1orf56
				RER1
				LGALS3BP
				COL6A1
				TPM4
				BZW1
				MSI2
				FAM207A
				MRPS6
				TROVE2
				PLK2
				PAPOLA
				TMEM120A
				ACAA2
				NSRP1
				BCAP31
				RHOBTB3
				PGRMC1
				MCFD2
				MRPL16
				MOCS2
				CYBA
				PPT1
				C9orf3
				CD55
				MBOAT7
				HIF1A
				HMGCR
				ATP2B1
				CCDC107
				SETD5
				INTS6
				PNRC2
				CEBPD
				AVPI1
				FGFBP3
				SREK1
				CCL2
				AP1S2
				IDI1
				PHACTR1
				KCNK3
				ASCL1

## Sheet: Cleaning
	GENE ID comparison		GENE ID comparison		GENE ID comparison
	Our	Janksy 2021	Our	Dong 2020	Our	Majd 2023
1	ADAM12	ADAM12	ABCA1	ABCA1	ALCAM	ALCAM
2	AFAP1L2	AFAP1L2	ADGRG6	ADGRG6	BCAN	BCAN
3	AFF3	AFF3	ADGRV1	ADGRV1	CDH19	CDH19
4	AHR	AHR	AFAP1L2	AFAP1L2	E2F1	E2F1
5	ANTXR1	ANTXR1	AHNAK	AHNAK	ELF4	ELF4
6	ARHGEF10	ARHGEF10	AHR	AHR	ETS1	ETS1
7	CACHD1	CACHD1	ANXA1	ANXA1	ETV1	ETV1
8	CASC15	CASC15	ARPC1B	ARPC1B	FGF12	FGF12
9	CDH19	CDH19	ATP1A2	ATP1A2	FOXB1	FOXB1
10	CDH6	CDH6	BGN	BGN	FOXD2	FOXD2
11	CDK18	CDK18	CADM4	CADM4	FOXD3	FOXD3
12	CELF2	CELF2	CDC42EP1	CDC42EP1	GDNF	GDNF
13	COL18A1	COL18A1	CDH19	CDH19	HOXA11	HOXA11
14	COL19A1	COL19A1	CDH6	CDH6	HOXA5	HOXA5
15	COL1A2	COL1A2	CELF2	CELF2	HOXC4	HOXC4
16	COL25A1	COL25A1	CMTM5	CMTM5	HOXC8	HOXC8
17	CPED1	CPED1	CNP	CNP	HOXD10	HOXD10
18	CYP27C1	CYP27C1	COL18A1	COL18A1	HOXD11	HOXD11
19	DOCK10	DOCK10	COL1A2	COL1A2	HOXD3	HOXD3
20	EDNRB	EDNRB	CRTAP	CRTAP	HOXD4	HOXD4
21	ENC1	ENC1	CTGF	CTGF	HOXD8	HOXD8
22	ERBB3	ERBB3	CTSC	CTSC	HOXD9	HOXD9
23	ERBB4	ERBB4	DLC1	DLC1	IER5L	IER5L
24	ETS1	ETS1	DLX2	DLX2	NRG1	NRG1
25	FBN1	FBN1	EDNRB	EDNRB	NRTN	NRTN
26	FHDC1	FHDC1	EGFLAM	EGFLAM	PLK2	PLK2
27	FIGN	FIGN	ERBB3	ERBB3	POSTN	POSTN
28	FRMD3	FRMD3	ETS1	ETS1	POU3F2	POU3F2
29	FRMD6	FRMD6	FAM198B	FAM198B	PTPRD	PTPRD
30	GAS2L3	GAS2L3	FGF12	FGF12	SOX1	SOX1
31	GAS7	GAS7	FIGN	FIGN	SOX9	SOX9
32	GFRA1	GFRA1	FILIP1L	FILIP1L	TBX15	TBX15
33	GPC3	GPC3	FOXD3	FOXD3	TBX2	TBX2
34	GPM6B	GPM6B	FOXD3-AS1	FOXD3-AS1	TGFA	TGFA
35	GRIK2	GRIK2	FRMD6	FRMD6	39692	AC073195.1
36	GULP1	GULP1	GAS7	GAS7	AATF	HIST1H4C
37	HMGA2	HMGA2	GFRA1	GFRA1	ABCA1	IGFBP5
38	ID3	ID3	GPM6B	GPM6B	ABCD2	MLANA
39	ID4	ID4	GULP1	GULP1	ABR	PTGDS
40	IGSF11	IGSF11	HMGA2	HMGA2	ACSBG1	SAT1
41	INSC	INSC	HOXA5	HOXA5	ADAM12	AC010331.1
42	ITGA4	ITGA4	ID2	ID2	ADAMTS1	AC015912.3
43	ITGA6	ITGA6	ID3	ID3	ADAMTS15	AC022081.1
44	ITGAV	ITGAV	ID4	ID4	ADAMTS4	AC073195.1
45	KIAA1755	KIAA1755	IFITM3	IFITM3	ADARB1	AC087239.1
46	LAMA2	LAMA2	IGFBP5	IGFBP5	ADD2	AC099522.2
47	LAMB1	LAMB1	INSC	INSC	ADGRE5	AC144652.1
48	LGI4	LGI4	ITGA6	ITGA6	ADGRG1	ADAMTS5
49	LHFPL2	LHFPL2	ITGAV	ITGAV	ADGRG6	ADCYAP1
50	LMO4	LMO4	KCTD12	KCTD12	ADGRV1	AL117379.1
51	LPCAT2	LPCAT2	LAMB1	LAMB1	ADRA2C	AL133367.1
52	LSAMP	LSAMP	LAMB2	LAMB2	AFAP1L1	ANXA2
53	MEF2C	MEF2C	LGALS3BP	LGALS3BP	AFAP1L2	AP001527.2
54	MEGF10	MEGF10	LGI4	LGI4	AFF3	AP002026.1
55	MICAL3	MICAL3	LITAF	LITAF	AHNAK	APOE
56	MMP17	MMP17	LMO4	LMO4	AHR	ARTN
57	MOXD1	MOXD1	LPAR6	LPAR6	AJUBA	BDNF
58	MPZ	MPZ	MEF2C	MEF2C	AKR1C1	CCDC85B
59	NAALADL2	NAALADL2	MEGF10	MEGF10	AKR1C2	CDK1
60	NCAM2	NCAM2	MOXD1	MOXD1	AKT1	CDK1
61	NGFR	NGFR	MPG	MPG	ALDH18A1	CDKN2A
62	NID1	NID1	MPZ	MPZ	ALPL	CNTF
63	NPR3	NPR3	MRPS6	MRPS6	AMPH	COL11A1
64	NRXN1	NRXN1	MXRA8	MXRA8	ANKRD20A1	COL12A1
65	PAG1	PAG1	NGFR	NGFR	ANKRD20A11P	COL4A1
66	PALLD	PALLD	NID1	NID1	ANKRD20A2	COL4A2
67	PCDH7	PCDH7	NPR3	NPR3	ANKRD20A3	CSF1
68	PDZD2	PDZD2	NR4A1	NR4A1	ANKRD20A4	CSF2
69	PDZRN3	PDZRN3	NRXN1	NRXN1	ANOS1	CXCL1
70	PKD2	PKD2	PACSIN3	PACSIN3	ANTXR1	CXCL8
71	PLAT	PLAT	PDLIM1	PDLIM1	ANXA1	DCT
72	PLP1	PLP1	PHLDA1	PHLDA1	APCDD1	DMD
73	PLS3	PLS3	PHLDA3	PHLDA3	APOBEC3C	E2F2
74	PLXDC2	PLXDC2	PLAT	PLAT	ARF5	E2F3
75	POSTN	POSTN	PLK2	PLK2	ARHGAP10	E2F4
76	PPP2R2B	PPP2R2B	PLP1	PLP1	ARHGAP24	E2F5
77	PRDM16	PRDM16	PLPP1	PLPP1	ARHGAP28	E2F6
78	PRICKLE1	PRICKLE1	PLS3	PLS3	ARHGEF10	E2F7
79	PRIMA1	PRIMA1	PLXDC2	PLXDC2	ARHGEF16	E2F8
80	PTN	PTN	PMP2	PMP2	ARL4A	EFNA1
81	PTPRJ	PTPRJ	POSTN	POSTN	ARL4C	EFNA2
82	PTPRZ1	PTPRZ1	PRIMA1	PRIMA1	ARPC1B	EFNA3
83	S100B	S100B	PTN	PTN	ASS1	EFNA4
84	SASH1	SASH1	PTPRZ1	PTPRZ1	ASTN1	EFNA5
85	SEMA3C	SEMA3C	RHOB	RHOB	ATP10B	EFNB1
86	SHC4	SHC4	S100A10	S100A10	ATP1A2	EFNB2
87	SLITRK6	SLITRK6	S100B	S100B	ATP6V1B1	EFNB3
88	SNTB1	SNTB1	SASH1	SASH1	ATP8A1	EGF
89	SPTBN1	SPTBN1	SFRP1	SFRP1	AVEN	EHF
90	SSFA2	SSFA2	SLITRK6	SLITRK6	BCAR3	ELF1
91	ST8SIA1	ST8SIA1	SPP1	SPP1	BCL6	ELF2
92	ST8SIA5	ST8SIA5	SPTBN1	SPTBN1	BEX1	ELF3
93	STARD13	STARD13	SSFA2	SSFA2	BGN	ELF5
94	TBX2	TBX2	TCF7L2	TCF7L2	BLOC1S1	ELK1
95	TCF7L2	TCF7L2	TFAP2A	TFAP2A	BMP4	ELK3
96	TENM3	TENM3	TGFBR2	TGFBR2	BMP5	ELK4
97	TGFBR2	TGFBR2	UBL3	UBL3	BMP7	ERF
98	TMEM132B	TMEM132B	VCL	VCL	BOC	ERG
99	UACA	UACA	WLS	WLS	BRINP2	ETS2
100	UBL3	UBL3	ZEB2	ZEB2	BTBD17	ETV2
101	USP53	USP53	39692	2020-09-02	C11orf84	ETV3
102	UST	UST	AATF	2020-09-07	C14orf159	ETV3L
103	VCL	VCL	ABCD2	2020-09-15	C15orf39	ETV4
104	WLS	WLS	ABR	AAMDC	C1orf21	ETV5
105	ZEB2	ZEB2	ACSBG1	ABCA8	C3orf58	ETV6
106	ZNF521	ZNF521	ADAM12	ABHD2	CA11	ETV7
107	39692	ABCA8	ADAMTS1	AC020571.3	CACHD1	FBXO5
108	AATF	ABCD3	ADAMTS15	ACAA2	CADM1	FBXO5
109	ABCA1	AC004158.2	ADAMTS4	ACADVL	CADM4	FEV
110	ABCD2	AC008937.2	ADARB1	ACSS1	CAMK2A	FGF1
111	ABR	AC011043.1	ADD2	ACTN4	CAMK2N1	FGF10
112	ACSBG1	AC090673.2	ADGRE5	ADAM23	CASC15	FGF11
113	ADAMTS1	ACSS3	ADGRG1	ADAMTS6	CAV1	FGF13
114	ADAMTS15	ACTB	ADRA2C	ADI1	CAV2	FGF14
115	ADAMTS4	ADAM23	AFAP1L1	AGRN	CCBE1	FGF15
116	ADARB1	ADAMTS6	AFF3	AIF1L	CCDC3	FGF16
117	ADD2	ADAMTS9	AJUBA	AKAP7	CCDC85C	FGF17
118	ADGRE5	ADAMTSL1	AKR1C1	ALAS1	CCSER1	FGF18
119	ADGRG1	AFF2	AKR1C2	ALDH1A1	CD4	FGF19
120	ADGRG6	AKAP13	AKT1	ALDH1A2	CD74	FGF2
121	ADGRV1	ALDH1A1	ALCAM	ALDH9A1	CDC42EP1	FGF20
122	ADRA2C	ANKRD44	ALDH18A1	ALDOA	CDC42EP4	FGF21
123	AFAP1L1	ANKRD50	ALPL	AMHR2	CDCA7	FGF22
124	AHNAK	ANLN	AMPH	ANGPTL4	CDH11	FGF23
125	AJUBA	ANXA2	ANKRD20A1	ANKRD50	CDH24	FGF3
126	AKR1C1	AP001347.6	ANKRD20A11P	ANXA2	CDH6	FGF4
127	AKR1C2	APOE	ANKRD20A2	ANXA5	CDK18	FGF5
128	AKT1	APOLD1	ANKRD20A3	AP1S2	CDK2AP1	FGF6
129	ALCAM	APP	ANKRD20A4	APOA1	CDK4	FGF7
130	ALDH18A1	AQP4-AS1	ANOS1	APOC1	CDKN1A	FGF8
131	ALPL	ARAP2	ANTXR1	APOE	CDKN1C	FGF9
132	AMPH	ARHGAP11A	APCDD1	APP	CDON	FLI1
133	ANKRD20A1	ARHGAP11B	APOBEC3C	APRT	CELF2	FN1
134	ANKRD20A11P	ARHGAP15	ARF5	ARHGAP15	CELSR1	FOS
135	ANKRD20A2	ARHGAP31	ARHGAP10	ARHGAP18	CENPV	FOSB
136	ANKRD20A3	ARHGAP42	ARHGAP24	ARID5B	CGNL1	FOSL1
137	ANKRD20A4	ARHGAP5	ARHGAP28	ARL14EP	CHST14	FOSL2
138	ANOS1	ARHGEF12	ARHGEF10	ARL5A	CLIP2	FOXA1
139	ANXA1	ARHGEF26	ARHGEF16	ARRDC3	CLMN	FOXA2
140	APCDD1	ARHGEF35	ARL4A	ASCL1	CLMP	FOXA3
141	APOBEC3C	ARNT2	ARL4C	ASPH	CLSPN	FOXB2
142	ARF5	ASAP2	ASS1	ATF3	CMTM5	FOXC1
143	ARHGAP10	ASPM	ASTN1	ATF4	CNP	FOXC2
144	ARHGAP24	ATAD2	ATP10B	ATP1B3	CNRIP1	FOXD1
145	ARHGAP28	ATF7IP2	ATP6V1B1	ATP2B1	CNTNAP3	FOXD4
146	ARHGEF16	ATP2B1	ATP8A1	AVPI1	COL11A2	FOXD5
147	ARL4A	AURKB	AVEN	AXL	COL18A1	FOXE1
148	ARL4C	B2M	BCAN	B2M	COL19A1	FOXE2
149	ARPC1B	B4GALT6	BCAR3	BACE2	COL1A2	FOXE3
150	ASS1	BACH1	BCL6	BAMBI	COL25A1	FOXF1
151	ASTN1	BARD1	BEX1	BBX	COL4A6	FOXF2
152	ATP10B	BCHE	BLOC1S1	BCAP31	COL6A3	FOXG1
153	ATP1A2	BICC1	BMP4	BCHE	COL9A1	FOXH1
154	ATP6V1B1	BLM	BMP5	BCL2L12	COLGALT2	FOXI1
155	ATP8A1	BRCA1	BMP7	BCL7C	COMMD1	FOXI2
156	AVEN	BRCA2	BOC	BDH2	CORO2B	FOXJ1
157	BCAN	BRIP1	BRINP2	BIRC7	CPE	FOXJ2
158	BCAR3	BUB1	BTBD17	BRE	CPED1	FOXJ3
159	BCL6	BUB1B	C11orf84	BST2	CPXM1	FOXK1
160	BEX1	C10orf11	C14orf159	BTG1	CRB2	FOXK2
161	BGN	C21orf58	C15orf39	BTG2	CREB3L1	FOXM1
162	BLOC1S1	C2orf48	C1orf21	BZW1	CREG1	FOXN1
163	BMP4	C3orf70	C3orf58	BZW2	CRMP1	FOXN2
164	BMP5	C4orf19	CA11	C10orf10	CRTAP	FOXN3
165	BMP7	C4orf21	CACHD1	C10orf11	CRYL1	FOXN4
166	BOC	CALD1	CADM1	C11orf96	CSRP2	FOXO1
167	BRINP2	CAMK2D	CAMK2A	C14orf1	CTGF	FOXO3
168	BTBD17	CASC5	CAMK2N1	C14orf119	CTNNA2	FOXO4
169	C11orf84	CCDC14	CASC15	C1orf198	CTSB	FOXO6
170	C14orf159	CCDC150	CAV1	C1orf56	CTSC	FOXP1
171	C15orf39	CCDC18	CAV2	C4orf3	CXADR	FOXP2
172	C1orf21	CDC14A	CCBE1	C6orf48	CXCR4	FOXP3
173	C3orf58	CDC25C	CCDC3	C7	CXXC4	FOXP4
174	CA11	CDC73	CCDC85C	C8orf33	CYP1B1	FOXQ1
175	CADM1	CDCA2	CCSER1	C8orf4	CYP27C1	FOXR1
176	CADM4	CDK1	CD4	C9orf3	CYP46A1	FOXR2
177	CAMK2A	CDK14	CD74	CALD1	DACH1	FST
178	CAMK2N1	CDK5RAP2	CDC42EP4	CALU	DACH2	GABPA
179	CAV1	CENPE	CDCA7	CASP9	DBNDD1	GAP43
180	CAV2	CENPF	CDH11	CAST	DCX	GH1
181	CCBE1	CENPI	CDH24	CCDC107	DDIAS	GMFB
182	CCDC3	CENPJ	CDK18	CCDC47	DFNA5	HCG9
183	CCDC85C	CENPK	CDK2AP1	CCDC8	DGKD	HES4
184	CCSER1	CENPP	CDK4	CCL2	DLC1	HIST1H1B
185	CD4	CEP112	CDKN1A	CCND2	DLX1	HIST1H1B
186	CD74	CEP128	CDKN1C	CCND3	DLX2	HIST1H1C
187	CDC42EP1	CEP135	CDON	CCS	DNAH10	HIST1H1D
188	CDC42EP4	CEP192	CELSR1	CD164	DNAJC15	HIST1H1D
189	CDCA7	CEP70	CENPV	CD46	DOCK10	HIST1H4C
190	CDH11	CHD7	CGNL1	CD55	DOCK3	HOXA1
191	CDH24	CHL1	CHST14	CD59	DOCK8	HOXA10
192	CDK2AP1	CHRM3	CLIP2	CD63	DPYSL2	HOXA12
193	CDK4	CHST11	CLMN	CD82	DSEL	HOXA13
194	CDKN1A	CHST9	CLMP	CD83	DSP	HOXA2
195	CDKN1C	CIT	CLSPN	CD9	DTNA	HOXA3
196	CDON	CKAP2	CNRIP1	CD99	DUSP4	HOXA4
197	CELSR1	CKAP5	CNTNAP3	CDC42EP5	ECE1	HOXA6
198	CENPV	CNN3	COL11A2	CDC73	EDNRA	HOXA7
199	CGNL1	CNTLN	COL19A1	CEBPB	EDNRB	HOXA8
200	CHST14	CNTN4	COL25A1	CEBPD	EFCAB6	HOXA9
201	CLIP2	CNTN6	COL4A6	CHL1	EGFLAM	HOXB1
202	CLMN	COL11A1	COL6A3	CHMP4A	EGFR	HOXB13
203	CLMP	COL1A1	COL9A1	CIB1	ELAVL4	HOXB2
204	CLSPN	COL20A1	COLGALT2	CLEC11A	ELOVL2	HOXB3
205	CMTM5	COL23A1	COMMD1	CLNS1A	EMID1	HOXB4
206	CNP	COL2A1	CORO2B	CLRN1	EMILIN1	HOXB5
207	CNRIP1	COL4A1	CPE	CMTM3	ENC1	HOXB6
208	CNTNAP3	COL4A2	CPED1	CMTM6	ENPP2	HOXB7
209	COL11A2	COL5A1	CPXM1	CMTM7	EPB41L4A	HOXB8
210	COL4A6	COL5A2	CRB2	CMTM8	EPHA4	HOXB9
211	COL6A3	COL9A3	CREB3L1	CNN2	EPHB1	HOXC10
212	COL9A1	CREB3L2	CREG1	CNN3	ERBB3	HOXC11
213	COLGALT2	CRISPLD1	CRMP1	CNPY2	ERBB4	HOXC12
214	COMMD1	CSMD1	CRYL1	COA4	ESRRG	HOXC13
215	CORO2B	CTC-260E6.6	CSRP2	COL11A1	ETNK2	HOXC5
216	CPE	CTD-2647L4.1	CTNNA2	COL14A1	EYA4	HOXC6
217	CPXM1	CTD-3088G3.8	CTSB	COL15A1	FAM181B	HOXC9
218	CRB2	CTDSPL	CXADR	COL1A1	FAM198B	HOXD1
219	CREB3L1	CTNNA3	CXCR4	COL20A1	FAM227A	HOXD12
220	CREG1	CYP7B1	CXXC4	COL2A1	FAM43A	HOXD13
221	CRMP1	DAAM2	CYP1B1	COL4A1	FAM84A	IFNA1
222	CRTAP	DAB1	CYP27C1	COL4A2	FAM95B1	IFNA10
223	CRYL1	DDAH1	CYP46A1	COL5A2	FAT1	IFNA13
224	CSRP2	DEPDC1B	DACH1	COL6A1	FAT3	IFNA14
225	CTGF	DGKH	DACH2	COL6A2	FBLN2	IFNA16
226	CTNNA2	DIAPH3	DBNDD1	COL9A3	FBN1	IFNA17
227	CTSB	DIP2B	DCX	COMT	FER1L4	IFNA2
228	CTSC	DISC1	DDIAS	COTL1	FGD6	IFNA21
229	CXADR	DLEU7	DFNA5	COX14	FGFR1	IFNA4
230	CXCR4	DLGAP1	DGKD	COX17	FGFR2	IFNA5
231	CXXC4	DLGAP5	DLX1	COX7A1	FGFRL1	IFNA6
232	CYP1B1	DMD	DNAH10	CPB1	FHDC1	IFNA7
233	CYP46A1	DNA2	DNAJC15	CRABP1	FIGN	IFNA8
234	DACH1	DNAH14	DOCK10	CREB3L2	FILIP1L	IFNB1
235	DACH2	DNAJC1	DOCK3	CREM	FLRT2	IFNG
236	DBNDD1	DOCK1	DOCK8	CRISPLD1	FMN1	IGF1
237	DCX	DOCK5	DPYSL2	CRYAB	FMR1	IL1
238	DDIAS	DOK6	DSEL	CSRP1	FNDC3B	IL2
239	DFNA5	DPY19L3	DSP	CTDSP2	FOXD3-AS1	IL3
240	DGKD	DST	DTNA	CTDSPL	FRAT2	IL5
241	DLC1	E2F3	DUSP4	CTNNA1	FRMD3	IL6
242	DLX1	ECT2	E2F1	CTNNAL1	FRMD6	INS
243	DLX2	EFCAB11	ECE1	CTNNB1	FRMD6-AS1	INSIG1
244	DNAH10	EFNB2	EDNRA	CTSA	FRZB	JUN
245	DNAJC15	ELF1	EFCAB6	CUEDC2	FSTL5	JUNB
246	DOCK3	EMP2	EGFR	CYB5B	FURIN	JUND
247	DOCK8	ENOX1	ELAVL4	CYBA	GABRG3	KCNRG
248	DPYSL2	EPB41L2	ELF4	CYP11A1	GAL3ST1	LEP
249	DSEL	EPHA5	ELOVL2	CYP11B1	GALNT10	LGALS3
250	DSP	EPS8	EMID1	CYP17A1	GALNT3	LIF
251	DTNA	ERBB2IP	EMILIN1	CYP21A2	GAMT	METAP2
252	DUSP4	ETV6	ENC1	CYR61	GAREM1	MIT
253	E2F1	EVI5	ENPP2	CYTL1	GAS2L3	MKI67
254	ECE1	EZH2	EPB41L4A	DAAM2	GAS7	MLANA
255	EDNRA	FAM134B	EPHA4	DAB2	GATM	NEAT1
256	EFCAB6	FAM13A	EPHB1	DAP	GDF10	NGF
257	EGFLAM	FAM3C	ERBB4	DBI	GDNF-AS1	NRG2
258	EGFR	FANCA	ESRRG	DCTD	GFRA1	NRG3
259	ELAVL4	FANCB	ETNK2	DDIT3	GFRA3	NRG4
260	ELF4	FANCI	ETV1	DDIT4	GJB1	NSG1
261	ELOVL2	FBN2	EYA4	DECR1	GLCE	NTF3
262	EMID1	FBN3	FAM181B	DFNB31	GLI2	NTF4
263	EMILIN1	FBXL7	FAM227A	DHCR24	GNG2	NUCKS1
264	ENPP2	FGD4	FAM43A	DHRS3	GNPDA1	OSM
265	EPB41L4A	FKBP10	FAM84A	DHRS4L2	GPC3	PAEP
266	EPHA4	FLNA	FAM95B1	DLK1	GPM6B	PAN3-AS1
267	EPHB1	FOLH1	FAT1	DMD	GPR162	PAX1
268	ESRRG	FOXO1	FAT3	DNAJB1	GPR37	PAX2
269	ETNK2	FOXP2	FBLN2	DNAJB4	GPRC5C	PAX3
270	ETV1	FRAS1	FBN1	DNAJC1	GPRIN1	PAX4
271	EYA4	FREM1	FER1L4	DNPH1	GPSM1	PAX5
272	FAM181B	FRMD4A	FGD6	DPM3	GRAMD3	PAX6
273	FAM198B	FRMD5	FGFR1	DPP10-AS1	GREB1L	PAX7
274	FAM227A	G2E3	FGFR2	DST	GRIK2	PAX8
275	FAM43A	GAB1	FGFRL1	DUSP5	GRM7-AS3	PAX9
276	FAM84A	GAREM	FHDC1	DUSP6	GSTT2	PCLAF
277	FAM95B1	GINS1	FLRT2	ECH1	GSTT2B	PDGF
278	FAT1	GINS3	FMN1	ECI2	GULP1	PGF
279	FAT3	GLI3	FMR1	EEF1A1	GUSBP3	PMEL
280	FBLN2	GLRA2	FNDC3B	EEF1D	GXYLT2	POU1F1
281	FER1L4	GNG12-AS1	FOXB1	EFEMP2	HAGLR	POU2F1
282	FGD6	GPC6	FOXD2	EGR1	HCN1	POU2F2
283	FGF12	GPR126	FRAT2	EIF3E	HDC	POU2F3
284	FGFR1	GPR98	FRMD3	EIF5B	HEPH	POU3F1
285	FGFR2	GPSM2	FRMD6-AS1	ELAVL1	HES6	POU3F3
286	FGFRL1	GRID2	FRZB	ELOVL1	HFM1	POU3F4
287	FILIP1L	GRIK3	FSTL5	ELP5	HHIP	POU4F1
288	FLRT2	GRIN2B	FURIN	EMP2	HID1	POU4F2
289	FMN1	GSN	GABRG3	EMP3	HIVEP2	POU4F3
290	FMR1	GTDC1	GAL3ST1	ENDOD1	HMGA2	POU5F1
291	FNDC3B	GTSE1	GALNT10	ENO1	HOOK1	POU5F1P1
292	FOXB1	HELLS	GALNT3	ENO3	HOXA-AS3	POU5F1P3
293	FOXD2	HES4	GAMT	EPB41L2	HOXB-AS3	POU5F1P4
294	FOXD3	HIF3A	GAREM1	EPHX1	HS3ST3B1	POU5F2
295	FOXD3-AS1	HIVEP1	GAS2L3	ERGIC3	HYDIN	POU6F1
296	FRAT2	HMCN1	GATM	EVA1B	ID2	POU6F2
297	FRMD6-AS1	HOXB3	GDF10	FABP7	ID3	PRL
298	FRZB	HP1BP3	GDNF	FADS2	ID4	PSPN
299	FSTL5	HS3ST4	GDNF-AS1	FAM126A	IER3	PTMS
300	FURIN	HS6ST3	GFRA3	FAM133B	IER5	PTTG1
301	GABRG3	HSPA12A	GJB1	FAM162A	IFITM3	RGS2
302	GAL3ST1	HSPG2	GLCE	FAM166B	IGFBP5	RUNX1
303	GALNT10	HUNK	GLI2	FAM195A	IGSF11	RUNX2
304	GALNT3	IGFBP7	GNG2	FAM207A	IL17D	RUNX3
305	GAMT	IL1RAP	GNPDA1	FAM210B	IL27RA	S100B
306	GAREM1	IL1RAPL1	GPC3	FAM3C	ILDR2	SCRG1
307	GATM	IL1RAPL2	GPR162	FARP1	INA	SOX10
308	GDF10	IMMP2L	GPR37	FBL	INSC	SOX11
309	GDNF	INPP4B	GPRC5C	FBN2	IRX3	SOX12
310	GDNF-AS1	IQGAP3	GPRIN1	FCGRT	IRX5	SOX13
311	GFRA3	ITGA1	GPSM1	FDX1	ISCA1	SOX14
312	GJB1	ITGA2	GRAMD3	FDXR	ISLR	SOX15
313	GLCE	ITGB3BP	GREB1L	FGFBP3	ITGA4	SOX17
314	GLI2	ITGB5	GRIK2	FKBP10	ITGA6	SOX18
315	GNG2	KANK1	GRM7-AS3	FKBP1A	ITGAV	SOX2
316	GNPDA1	KAT2B	GSTT2	FLNA	ITGB8	SOX21
317	GPR162	KCNH8	GSTT2B	FLRT3	ITPR3	SOX3
318	GPR37	KCNIP1	GUSBP3	FN1	KANK4	SOX30
319	GPRC5C	KCNK2	GXYLT2	FOS	KAT7	SOX4
320	GPRIN1	KCNMB4	HAGLR	FOSB	KCNE1B	SOX5
321	GPSM1	KHDRBS2	HCN1	FRMD4A	KCNH2	SOX6
322	GRAMD3	KIAA0922	HDC	FSTL1	KCNK5	SOX7
323	GREB1L	KIAA1217	HEPH	FXYD1	KCNN3	SOX8
324	GRM7-AS3	KIF11	HES6	GADD45B	KCP	SPARC
325	GSTT2	KIF13A	HFM1	GALM	KCTD12	SPDEF
326	GSTT2B	KIF13B	HHIP	GALNT2	KIAA1522	SPI1
327	GUSBP3	KIF14	HID1	GIPC1	KIAA1755	SPIB
328	GXYLT2	KIF15	HIVEP2	GIPC2	KIF21B	SPIC
329	HAGLR	KIF18A	HOOK1	GJA1	KLHL4	SRY
330	HCN1	KIF18B	HOXA11	GLIPR2	KRTAP21-1	TBR1
331	HDC	KIF20B	HOXA-AS3	GLRX	LAMA2	TBX1
332	HEPH	KIF23	HOXB-AS3	GLTP	LAMB1	TBX10
333	HES6	KIF2C	HOXC4	GLUL	LAMB2	TBX18
334	HFM1	KIF4A	HOXC8	GNAI2	LAMC3	TBX19
335	HHIP	KIFC1	HOXD10	GNG11	LGALS3BP	TBX20
336	HID1	KIRREL	HOXD11	GPC1	LGI4	TBX21
337	HIVEP2	KLF12	HOXD3	GPC6	LHFPL2	TBX22
338	HOOK1	KNTC1	HOXD4	GPX8	LHX1	TBX3
339	HOXA11	LAMA4	HOXD8	GRAMD1B	LIMS2	TBX4
340	HOXA5	LAMC1	HOXD9	GRB14	LINC00327	TBX5
341	HOXA-AS3	LEPREL1	HS3ST3B1	GRPEL1	LINC00367	TBX6
342	HOXB-AS3	LGR4	HYDIN	GSDMD	LINC00486	TBXT
343	HOXC4	LIMA1	IER3	GSN	LINC00987	TGBF1
344	HOXC8	LIMD1	IER5	GSTA4	LINC01314	TGFB2
345	HOXD10	LINC00478	IER5L	GSTK1	LIPH	TGFB3
346	HOXD11	LINC00669	IGSF11	GSTO1	LITAF	TIMP3
347	HOXD3	LINC01057	IL17D	GTPBP4	LMO4	TOP1
348	HOXD4	LMCD1-AS1	IL27RA	GYPC	LOC100008587	TOP1
349	HOXD8	LMNB1	ILDR2	H2AFJ	LOC100130950	TOP2A
350	HOXD9	LMO3	INA	HADHB	LOC100289279	TRPM1
351	HS3ST3B1	LPHN2	IRX3	HBA1	LOC101927480	TYRP1
352	HYDIN	LPL	IRX5	HBA2	LOC101928307	UBE2S
353	ID2	LPP	ISCA1	HBB	LOC101929072	VEGFA
354	IER3	LRCH1	ISLR	HBG1	LOC101929583	VEGFB
355	IER5	LRCH3	ITGA4	HBG2	LOC101929777	VEGFC
356	IER5L	LRRC7	ITGB8	HDDC2	LOC102546299	VEGFD
357	IFITM3	LRRTM4	ITPR3	HES1	LOC102723968	ZNF106
358	IGFBP5	LTBP1	KANK4	HES4	LOC102724623
359	IL17D	MAML2	KAT7	HEY1	LOC105370994
360	IL27RA	MAP3K1	KCNE1B	HEY2	LOC440040
361	ILDR2	MAP4K4	KCNH2	HIBADH	LPAR1
362	INA	MAP4K5	KCNK5	HIF1A	LPAR6
363	IRX3	MAPRE2	KCNN3	HIF3A	LPCAT2
364	IRX5	MARCKS	KCP	HLA-A	LRP2
365	ISCA1	MCAM	KIAA1522	HLA-B	LRRC4
366	ISLR	MDFIC	KIAA1755	HLA-C	LRRC8B
367	ITGB8	MED12L	KIF21B	HLA-E	LRRK2
368	ITPR3	MEF2C-AS1	KLHL4	HMG20B	LRRN1
369	KANK4	MEGF9	KRTAP21-1	HMGCR	LSAMP
370	KAT7	MELK	LAMA2	HOPX	LUM
371	KCNE1B	METRN	LAMC3	HOTAIRM1	LYN
372	KCNH2	MID1	LHFPL2	HOXB7	MAATS1
373	KCNK5	MIR181A1HG	LHX1	HOXB9	MAP1B
374	KCNN3	MIR181A2HG	LIMS2	HSP90B1	MAPK10
375	KCP	MIR4435-1HG	LINC00327	HSPA12A	MAPK4
376	KCTD12	MIR503HG	LINC00367	HSPA1A	MCM10
377	KIAA1522	MIS18BP1	LINC00486	HSPA1B	MDGA1
378	KIF21B	MKI67	LINC00987	HSPA9	MECOM
379	KLHL4	MMP16	LINC01314	HSPB1	MEF2C
380	KRTAP21-1	MMS22L	LIPH	HSPB2	MEGF10
381	LAMB2	MOB3B	LOC100008587	HSPB6	MEST
382	LAMC3	MTBP	LOC100130950	HSPD1	METRNL
383	LGALS3BP	MVB12B	LOC100289279	HSPE1	MGLL
384	LHX1	MXD3	LOC101927480	HSPG2	MIAT
385	LIMS2	MYBL1	LOC101928307	ID1	MICAL3
386	LINC00327	MYO10	LOC101929072	IDI1	MIF
387	LINC00367	NCALD	LOC101929583	IER2	MIR1469
388	LINC00486	NCAPD2	LOC101929777	IFI16	MIR325HG
389	LINC00987	NCAPG	LOC102546299	IFITM2	MIR3606
390	LINC01314	NCAPG2	LOC102723968	IGF2	MIR4640
391	LIPH	NDC80	LOC102724623	IGF2BP2	MIR4651
392	LITAF	NDE1	LOC105370994	IGFBP2	MIR4751
393	LOC100008587	NFIA	LOC440040	IGFBP4	MIR6165
394	LOC100130950	NHS	LPAR1	IGFBP7	MIR6755
395	LOC100289279	NKAIN2	LPCAT2	IKBKAP	MIR6756
396	LOC101927480	NKAIN3	LRP2	IL11RA	MIR6843
397	LOC101928307	NLGN1	LRRC4	IL6ST	MIR6872
398	LOC101929072	NLGN4X	LRRC8B	IMPDH2	MIR7704
399	LOC101929583	NOTCH1	LRRK2	ING2	MIR9-2
400	LOC101929777	NOTCH2	LRRN1	INHA	MMP15
401	LOC102546299	NOX4	LSAMP	INSR	MMP17
402	LOC102723968	NPAS3	LUM	INTS6	MOXD1
403	LOC102724623	NR2F2	LYN	IRF1	MPG
404	LOC105370994	NR2F2-AS1	MAATS1	IRS1	MPPED2
405	LOC440040	NR6A1	MAP1B	ISG15	MPZ
406	LPAR1	NRIP1	MAPK10	ITGA1	MRC2
407	LPAR6	NRXN3	MAPK4	ITGB1	MRPS6
408	LRP2	NUCKS1	MCM10	ITM2A	MSX1
409	LRRC4	NUDT4	MDGA1	ITM2B	MTA2
410	LRRC8B	NUF2	MECOM	ITM2C	MTMR11
411	LRRK2	NUSAP1	MEST	IVD	MTRNR2L1
412	LRRN1	OAF	METRNL	JUN	MTRNR2L10
413	LUM	OLFML2A	MGLL	JUNB	MTSS1L
414	LYN	OSBPL10	MIAT	KCNK3	MTUS1
415	MAATS1	OSBPL1A	MICAL3	KIF13B	MUM1L1
416	MAP1B	OXR1	MIF	KLF2	MXRA8
417	MAPK10	PACSIN2	MIR1469	KLF4	MYADM
418	MAPK4	PARD3	MIR325HG	KLF6	MYCN
419	MCM10	PARD3B	MIR3606	KLHDC8B	MYD88
420	MDGA1	PARPBP	MIR4640	LAMA4	MYO16
421	MECOM	PCDH9	MIR4651	LAMC1	MYO7A
422	MEST	PCSK5	MIR4751	LAMP5	MYOF
423	METRNL	PDE4B	MIR6165	LAPTM4A	NAALADL2
424	MGLL	PDE4D	MIR6755	LAPTM4B	NCAM2
425	MIAT	PDE7B	MIR6756	LDHA	NCKAP5
426	MIF	PDZRN4	MIR6843	LDHB	NEBL
427	MIR1469	PEAK1	MIR6872	LDLR	NEFL
428	MIR325HG	PHLDB1	MIR7704	LEPROT	NEFM
429	MIR3606	PHLDB2	MIR9-2	LGALS1	NEK6
430	MIR4640	PHLPP1	MMP15	LIMA1	NELL2
431	MIR4651	PIF1	MMP17	LIMCH1	NETO2
432	MIR4751	PKNOX2	MPPED2	LIMS1	NEXN
433	MIR6165	PKP4	MRC2	LINC00400	NFATC2
434	MIR6755	PLA2G4A	MSX1	LINC00998	NFATC4
435	MIR6756	PLCB4	MTA2	LINC01198	NGFR
436	MIR6843	PLCE1	MTMR11	LMAN1	NID1
437	MIR6872	PLEKHA4	MTRNR2L1	LMCD1	NIT2
438	MIR7704	PLEKHG1	MTRNR2L10	LMNA	NKD1
439	MIR9-2	PMP22	MTSS1L	LPL	NOVA2
440	MMP15	POLA1	MTUS1	LPP	NPL
441	MPG	POLQ	MUM1L1	LSM14A	NPR3
442	MPPED2	POLR2F	MYADM	LSR	NQO1
443	MRC2	PON2	MYCN	LTBP1	NR2C1
444	MRPS6	PPAP2A	MYD88	LUZP1	NR4A1
445	MSX1	PPFIBP1	MYO16	LY6E	NR4A2
446	MTA2	PRC1	MYO7A	MAFF	NRCAM
447	MTMR11	PRELID2	MYOF	MAL	NRXN1
448	MTRNR2L1	PREX1	NAALADL2	MAN1A1	NT5DC2
449	MTRNR2L10	PRICKLE2	NCAM2	MAP3K1	NTM
450	MTSS1L	PRIM2	NCKAP5	MAPRE2	ODC1
451	MTUS1	PRKCA	NEBL	MARCKS	OLFM3
452	MUM1L1	PRKD1	NEFL	MATN2	OVOS2
453	MXRA8	PRKG1	NEFM	MBNL2	OXTR
454	MYADM	PTK2	NEK6	MBOAT7	P2RY1
455	MYCN	PTPN12	NELL2	MBP	PACSIN3
456	MYD88	PTPN13	NETO2	MC2R	PAG1
457	MYO16	PTPN14	NEXN	MCAM	PAK3
458	MYO7A	PTPRM	NFATC2	MCF2	PALLD
459	MYOF	QKI	NFATC4	MCFD2	PALM3
460	NCKAP5	RAD51AP1	NIT2	MCL1	PAPLN
461	NEBL	RAD51B	NKD1	MDFI	PCAT6
462	NEFL	RAD54B	NOVA2	MDFIC	PCDH11X
463	NEFM	RAI14	NPL	MESDC2	PCDH7
464	NEK6	RALGPS2	NQO1	METRN	PCDHB14
465	NELL2	RAP1A	NR2C1	MFGE8	PCOLCE
466	NETO2	RAP1GDS1	NR4A2	MGARP	PDE1C
467	NEXN	RAPGEF2	NRCAM	MGST1	PDGFRB
468	NFATC2	RARB	NRG1	MGST2	PDLIM1
469	NFATC4	RASGEF1C	NRTN	MIA	PDZD2
470	NIT2	RASSF4	NT5DC2	MIR202HG	PDZRN3
471	NKD1	RBL1	NTM	MLEC	PGM1
472	NOVA2	RBMS2	ODC1	MMP2	PHACTR3
473	NPL	RBMS3	OLFM3	MOB4	PHF19
474	NQO1	RBPMS	OVOS2	MOCS2	PHLDA1
475	NR2C1	RCBTB2	OXTR	MRAP	PHLDA3
476	NR4A1	RFC3	P2RY1	MRPL10	PITPNC1
477	NR4A2	RFTN2	PAG1	MRPL16	PKD2
478	NRCAM	RGCC	PAK3	MRPL24	PKDCC
479	NRG1	RGL1	PALLD	MRPL33	PKHD1
480	NRTN	RHOJ	PALM3	MRPL50	PKMYT1
481	NT5DC2	RNF130	PAPLN	MRPS28	PLA2G3
482	NTM	ROR1	PCAT6	MSI2	PLAT
483	ODC1	RP11-120D5.1	PCDH11X	MT1E	PLAU
484	OLFM3	RP11-123O10.4	PCDH7	MT2A	PLCD4
485	OVOS2	RP11-141M1.3	PCDHB14	MT3	PLD5
486	OXTR	RP11-152K4.2	PCOLCE	MTAP	PLEKHA6
487	P2RY1	RP11-222A11.1	PDE1C	MYH7B	PLEKHB1
488	PACSIN3	RP11-242P2.1	PDGFRB	MYL12A	PLEKHH1
489	PAK3	RP11-307P5.1	PDZD2	MYL9	PLLP
490	PALM3	RP11-308N19.1	PDZRN3	MYLIP	PLOD1
491	PAPLN	RP11-366L20.2	PGM1	MYO10	PLP1
492	PCAT6	RP11-366L20.3	PHACTR3	NBEAL1	PLPP1
493	PCDH11X	RP11-37B2.1	PHF19	NDN	PLPPR3
494	PCDHB14	RP11-413B19.2	PITPNC1	NDRG2	PLS3
495	PCOLCE	RP11-436K8.1	PKD2	NDUFA11	PLXDC2
496	PDE1C	RP11-444D3.1	PKDCC	NDUFA4	PLXNA4
497	PDGFRB	RP11-649G15.2	PKHD1	NDUFC1	PMP2
498	PDLIM1	RP1-167A14.2	PKMYT1	NFE2L2	PNMA2
499	PGM1	RP11-696N14.1	PLA2G3	NFIA	PODXL2
500	PHACTR3	RP11-776H12.1	PLAU	NFKBIA	PPARGC1A
501	PHF19	RP11-945C19.4	PLCD4	NKAIN3	PPP1R18
502	PHLDA1	RTKN2	PLD5	NKAIN4	PPP1R35
503	PHLDA3	RTTN	PLEKHA6	NOB1	PPP2R2B
504	PITPNC1	SAMD5	PLEKHB1	NOP16	PRAG1
505	PKDCC	SAMHD1	PLEKHH1	NOSTRIN	PRDM16
506	PKHD1	SCLT1	PLLP	NOTCH1	PRDX1
507	PKMYT1	SCN7A	PLOD1	NOTCH2	PRICKLE1
508	PLA2G3	SDK2	PLPPR3	NOV	PRIMA1
509	PLAU	SGK223	PLXNA4	NPC2	PRKCI
510	PLCD4	SGOL1	PNMA2	NPM3	PROSER2
511	PLD5	SGOL2	PODXL2	NQO2	PROX1
512	PLEKHA6	SH3D19	POU3F2	NR2F1	PRRT2
513	PLEKHB1	SHISA9	PPARGC1A	NR2F2	PRSS12
514	PLEKHH1	SIPA1L1	PPP1R18	NR5A1	PTN
515	PLK2	SIPA1L2	PPP1R35	NRXN3	PTPRG
516	PLLP	SKA2	PPP2R2B	NSRP1	PTPRJ
517	PLOD1	SLC35F1	PRAG1	NUCB1	PTPRZ1
518	PLPP1	SMC4	PRDM16	NUDT4	QPCT
519	PLPPR3	SORBS1	PRDX1	OAF	RAB7B
520	PLXNA4	SORCS1	PRICKLE1	OAZ2	RADIL
521	PMP2	SOX10	PRKCI	OLFML2A	RASGRP1
522	PNMA2	SOX13	PROSER2	OSR2	RASL11B
523	PODXL2	SOX5	PROX1	OSTC	RCSD1
524	POU3F2	SOX6	PRRT2	OXA1L	RELN
525	PPARGC1A	SPARC	PRSS12	OXR1	RGMA
526	PPP1R18	SPATA5	PTPRD	P3H2	RGS10
527	PPP1R35	SPATA6	PTPRG	P4HA1	RGS16
528	PRAG1	SPC25	PTPRJ	P4HB	RGS5
529	PRDX1	SPRED1	QPCT	PAPOLA	RHBDF1
530	PRKCI	SRGAP2	RAB7B	PAPSS2	RHOB
531	PROSER2	ST5	RADIL	PBXIP1	RNASEH2B
532	PROX1	ST6GAL1	RASGRP1	PCGF5	RNF157
533	PRRT2	ST6GALNAC3	RASL11B	PDIA6	RNF208
534	PRSS12	STIL	RCSD1	PDK4	ROPN1B
535	PTPRD	STK3	RELN	PDPN	ROR2
536	PTPRG	STOX2	RGMA	PEG10	RPL23P8
537	QPCT	STXBP6	RGS10	PEG3	RUBCNL
538	RAB7B	SUCLG2	RGS16	PELO	RXRG
539	RADIL	SVIL	RGS5	PGRMC1	RYR1
540	RASGRP1	SYNE2	RHBDF1	PHACTR1	S100A10
541	RASL11B	SYNPR	RNASEH2B	PHACTR2	S100B
542	RCSD1	TACC3	RNF157	PHB	S1PR3
543	RELN	TANC1	RNF208	PHF20L1	SALL1
544	RGMA	TAOK3	ROPN1B	PHGDH	SALL3
545	RGS10	TCF7L1	ROR2	PKN2	SAMD4A
546	RGS16	TFDP2	RPL23P8	PLA2G16	SASH1
547	RGS5	TGFB2	RUBCNL	PLAC9	SBNO2
548	RHBDF1	TGFBR3	RXRG	PLAGL1	SCN8A
549	RHOB	TIMP3	RYR1	PLEKHA4	SCN9A
550	RNASEH2B	TLE4	S1PR3	PLIN3	SCUBE1
551	RNF157	TMEM117	SALL1	PLP2	SDC2
552	RNF208	TMEM2	SALL3	PLTP	SEC14L6
553	ROPN1B	TMPO	SAMD4A	PMEPA1	SEMA3A
554	ROR2	TMTC2	SBNO2	PMP22	SEMA3C
555	RPL23P8	TNIK	SCN8A	PNRC1	SEMA3D
556	RUBCNL	TNS3	SCN9A	PNRC2	SEMA3G
557	RXRG	TOM1L2	SCUBE1	POLR2G	SEMA5A
558	RYR1	TOP2A	SDC2	PON2	SEMA6A
559	S100A10	TPX2	SEC14L6	POR	SEMA6B
560	S1PR3	TRAF3IP2-AS1	SEMA3A	PPFIBP1	SERPINB9
561	SALL1	TRPM3	SEMA3C	PPIB	SFRP1
562	SALL3	TRPS1	SEMA3D	PPIF	SFRP2
563	SAMD4A	TSPAN11	SEMA3G	PPP1R14A	SH3BP1
564	SBNO2	TTYH1	SEMA5A	PPP1R15A	SHC2
565	SCN8A	USP25	SEMA6A	PPP2R1A	SHC4
566	SCN9A	UTRN	SEMA6B	PPT1	SHTN1
567	SCUBE1	VCAN	SERPINB9	PRCP	SIPA1L3
568	SDC2	VCAN-AS1	SFRP2	PRDX3	SIX4
569	SEC14L6	VGLL3	SH3BP1	PRDX6	SLC12A7
570	SEMA3A	VIM	SHC2	PRKAR1A	SLC1A3
571	SEMA3D	VRK1	SHC4	PRKCA	SLC1A5
572	SEMA3G	VWA8	SHTN1	PRKCDBP	SLC20A2
573	SEMA5A	WBSCR17	SIPA1L3	PRPF4B	SLC22A23
574	SEMA6A	WDHD1	SIX4	PRR13	SLC2A1
575	SEMA6B	WDPCP	SLC12A7	PRSS23	SLC2A14
576	SERPINB9	WHSC1	SLC1A3	PSAP	SLC2A3
577	SFRP1	WIPF1	SLC1A5	PSAT1	SLC35F2
578	SFRP2	WWTR1	SLC20A2	PSMB8	SLC39A7
579	SH3BP1	XKR4	SLC22A23	PSME1	SLC43A3
580	SHC2	XRCC4	SLC2A1	PSME2	SLC44A5
581	SHTN1	YAP1	SLC2A14	PTK2	SLC45A3
582	SIPA1L3	ZFP36L1	SLC2A3	PTP4A1	SLC47A1
583	SIX4	ZNF536	SLC35F2	PTS	SLC4A8
584	SLC12A7	ZNF730	SLC39A7	PUF60	SLC5A3
585	SLC1A3	ZNF804B	SLC43A3	PVRL2	SLC7A11
586	SLC1A5		SLC44A5	QKI	SLC7A8
587	SLC20A2		SLC45A3	QPRT	SLCO5A1
588	SLC22A23		SLC47A1	RAB13	SLIT2
589	SLC2A1		SLC4A8	RAB20	SLITRK6
590	SLC2A14		SLC5A3	RAB31	SNAI2
591	SLC2A3		SLC7A11	RAB32	SNHG15
592	SLC35F2		SLC7A8	RAB34	SNTB1
593	SLC39A7		SLCO5A1	RAB38	SNX22
594	SLC43A3		SLIT2	RAB7A	SORL1
595	SLC44A5		SNAI2	RAP1A	SOX2-OT
596	SLC45A3		SNHG15	RARRES2	SP5
597	SLC47A1		SNTB1	RASSF4	SP6
598	SLC4A8		SNX22	RBBP6	SPATA18
599	SLC5A3		SORL1	RBBP7	SPDYE2B
600	SLC7A11		SOX1	RBM47	SPHK1
601	SLC7A8		SOX2-OT	RBMS3-AS3	SPOCK1
602	SLCO5A1		SOX9	RBPMS	SPP1
603	SLIT2		SP5	RCBTB2	SPTBN1
604	SNAI2		SP6	RCN1	SRM
605	SNHG15		SPATA18	RDX	SSBP2
606	SNX22		SPDYE2B	REEP6	SSC4D
607	SORL1		SPHK1	RER1	SSFA2
608	SOX1		SPOCK1	REST	SSUH2
609	SOX2-OT		SRM	REXO2	ST3GAL6
610	SOX9		SSBP2	RFXANK	ST6GALNAC5
611	SP5		SSC4D	RGCC	ST8SIA1
612	SP6		SSUH2	RGS2	ST8SIA5
613	SPATA18		ST3GAL6	RHOBTB3	STARD13
614	SPDYE2B		ST6GALNAC5	RHOC	STC1
615	SPHK1		ST8SIA1	RHOJ	SULF1
616	SPOCK1		ST8SIA5	RNASE1	SULT1A1
617	SPP1		STARD13	RND3	TAF4B
618	SRM		STC1	RNF130	TAGLN
619	SSBP2		SULF1	ROMO1	TCF4
620	SSC4D		SULT1A1	RORA	TCF7L2
621	SSUH2		TAF4B	RRBP1	TCN2
622	ST3GAL6		TAGLN	RSL1D1	TEAD4
623	ST6GALNAC5		TBX15	RUVBL2	TENM2
624	STC1		TBX2	RWDD4	TENM3
625	SULF1		TCF4	S100A11	TENM4
626	SULT1A1		TCN2	S100A16	TEX15
627	TAF4B		TEAD4	S100A4	TFAP2A
628	TAGLN		TENM2	S100A6	TGFBR2
629	TBX15		TENM3	SAMHD1	THY1
630	TCF4		TENM4	SAT1	TIAM1
631	TCN2		TEX15	SAT2	TMCC2
632	TEAD4		TGFA	SCARB1	TMEM132B
633	TENM2		THY1	SCARB2	TMEM132C
634	TENM4		TIAM1	SCD5	TMEM229A
635	TEX15		TMCC2	SCN7A	TMEM229B
636	TFAP2A		TMEM132B	SCP2	TMEM243
637	TGFA		TMEM132C	SCPEP1	TMEM255A
638	THY1		TMEM229A	SCRG1	TMOD2
639	TIAM1		TMEM229B	SDCBP	TNFRSF19
640	TMCC2		TMEM243	SDHC	TNFRSF21
641	TMEM132C		TMEM255A	SDHD	TNFRSF25
642	TMEM229A		TMOD2	SECISBP2L	TP53I11
643	TMEM229B		TNFRSF19	SEMA3B	TPD52
644	TMEM243		TNFRSF21	SEPP1	TPK1
645	TMEM255A		TNFRSF25	SERBP1	TPM1
646	TMOD2		TP53I11	SERF2	TRIM14
647	TNFRSF19		TPD52	SERP1	TRIM48
648	TNFRSF21		TPK1	SERPINA5	TRIM49D1
649	TNFRSF25		TPM1	SERPINB6	TRIM49D2
650	TP53I11		TRIM14	SERPINH1	TRIM53AP
651	TPD52		TRIM48	SERTAD1	TRIM8
652	TPK1		TRIM49D1	SETD5	TRIM9
653	TPM1		TRIM49D2	SFT2D1	TTC29
654	TRIM14		TRIM53AP	SGCE	TUBB2A
655	TRIM48		TRIM8	SH3BGRL	TUBB4A
656	TRIM49D1		TRIM9	SH3BP5	U2AF2
657	TRIM49D2		TTC29	SHFM1	UACA
658	TRIM53AP		TUBB2A	SHMT1	UBASH3B
659	TRIM8		TUBB4A	SIAH2	UBL3
660	TRIM9		U2AF2	SIGLEC11	UCP2
661	TTC29		UACA	SIVA1	UGT8
662	TUBB2A		UBASH3B	SKAP2	ULK4P2
663	TUBB4A		UCP2	SLC15A3	ULK4P3
664	U2AF2		UGT8	SLC16A1	UNC5C
665	UBASH3B		ULK4P2	SLC16A9	USP44
666	UCP2		ULK4P3	SLC23A2	USP53
667	UGT8		UNC5C	SLC25A37	UST
668	ULK4P2		USP44	SLC25A6	VCL
669	ULK4P3		USP53	SLC26A2	VGF
670	UNC5C		UST	SLC35F1	VLDLR
671	USP44		VGF	SLC39A1	VWCE
672	VGF		VLDLR	SLC39A10	WBP1L
673	VLDLR		VWCE	SLITRK2	WDR76
674	VWCE		WBP1L	SMAD5	WFIKKN1
675	WBP1L		WDR76	SNAP23	WIPF3
676	WDR76		WFIKKN1	SNCG	WLS
677	WFIKKN1		WIPF3	SNHG25	WNK2
678	WIPF3		WNK2	SNX5	WNT5A
679	WNK2		WNT5A	SOAT1	ZC3H12B
680	WNT5A		ZC3H12B	SOCS3	ZCCHC17
681	ZC3H12B		ZCCHC17	SORBS2	ZEB2
682	ZCCHC17		ZFPM2	SOX10	ZFPM2
683	ZFPM2		ZIC1	SOX2	ZIC1
684	ZIC1		ZIC2	SPARC	ZIC2
685	ZIC2		ZIC3	SPG20	ZIC3
686	ZIC3		ZIC4	SPRED1	ZIC4
687	ZIC4		ZIC5	SPRY1	ZIC5
688	ZIC5		ZNF252P-AS1	SPRY2	ZNF252P-AS1
689	ZNF252P-AS1		ZNF37BP	SQSTM1	ZNF37BP
690	ZNF37BP		ZNF423	SREK1	ZNF423
691	ZNF423		ZNF432	SSR2	ZNF432
692	ZNF432		ZNF467	SSR3	ZNF467
693	ZNF467		ZNF521	ST3GAL4	ZNF521
694	ZNF703		ZNF703	STAR	ZNF703
not shared	588		598	STK19	660
				STOML2
				SULT2A1
				SURF6
				SYAP1
				SYNE1
				SYNGR1
				SYPL1
				TAPBP
				TAX1BP3
				TBCA
				TBX3
				TCEA3
				TCEAL8
				TEAD2
				TEX264
				TGFB1I1
				TGFBR3
				TGIF1
				TIMP1
				TIMP3
				TJP1
				TLN1
				TMBIM6
				TMED10
				TMED2
				TMED9
				TMEM120A
				TMEM123
				TMEM14A
				TMEM176A
				TMEM176B
				TMEM245
				TMEM256
				TMEM258
				TMEM47
				TMEM97
				TMEM98
				TNFRSF1A
				TNNI3
				TNS3
				TNXB
				TOMM7
				TP53I13
				TPBG
				TPD52L1
				TPM2
				TPM4
				TPT1
				TPT1-AS1
				TRAM1
				TRIP6
				TROVE2
				TRPM3
				TSC22D3
				TSC22D4
				TSPAN15
				TSPAN18
				TSPAN6
				TSPAN7
				TSPO
				TTYH1
				TXN2
				TXNIP
				UBXN2A
				UGCG
				UQCR11
				UQCRQ
				VAMP5
				VAPA
				VCAN
				VGLL4
				VIM
				VMP1
				VPREB3
				WASF2
				WBP5
				WSB1
				WWTR1
				XKR4
				YBX3
				ZCCHC24
				ZFAND5
				ZFP36
				ZFP36L1
				ZFP36L2
				ZG16B
				ZNF275
				ZNF503
				ZNF536

## Sheet: Shared among three
	Duplicated genes								Duplicated genes
	Janksy 2021	Dong 2020	Majd 2023						Janksy 2021	Dong 2020	Majd 2023
1	ADAM12	ABCA1	ALCAM		In green are the genes shared by the three papers and our data			1	AFAP1L2	AFAP1L2	CDH19
2	AFAP1L2	ADGRG6	BCAN					2	AHR	AHR	ETS1
3	AFF3	ADGRV1	CDH19					3	CDH19	CDH19	FGF12
4	AHR	AFAP1L2	E2F1					4	CDH6	CDH6	FOXD3
5	ANTXR1	AHNAK	ELF4					5	CELF2	CELF2	HOXA5
6	ARHGEF10	AHR	ETS1					6	COL18A1	COL18A1	PLK2
7	CACHD1	ANXA1	ETV1					7	COL1A2	COL1A2	POSTN
8	CASC15	ARPC1B	FGF12					8	EDNRB	EDNRB	TBX2
9	CDH19	ATP1A2	FOXB1					9	ERBB3	ERBB3	ALCAM
10	CDH6	BGN	FOXD2					10	ETS1	ETS1	BCAN
11	CDK18	CADM4	FOXD3					11	FIGN	FGF12	E2F1
12	CELF2	CDC42EP1	GDNF					12	FRMD6	FIGN	ELF4
13	COL18A1	CDH19	HOXA11					13	GAS7	FOXD3	ETV1
14	COL19A1	CDH6	HOXA5					14	GFRA1	FRMD6	FOXB1
15	COL1A2	CELF2	HOXC4					15	GPM6B	GAS7	FOXD2
16	COL25A1	CMTM5	HOXC8					16	GULP1	GFRA1	GDNF
17	CPED1	CNP	HOXD10					17	HMGA2	GPM6B	HOXA11
18	CYP27C1	COL18A1	HOXD11					18	ID3	GULP1	HOXC4
19	DOCK10	COL1A2	HOXD3					19	ID4	HMGA2	HOXC8
20	EDNRB	CRTAP	HOXD4					20	INSC	HOXA5	HOXD10
21	ENC1	CTGF	HOXD8					21	ITGA6	ID3	HOXD11
22	ERBB3	CTSC	HOXD9					22	ITGAV	ID4	HOXD3
23	ERBB4	DLC1	IER5L					23	LAMB1	INSC	HOXD4
24	ETS1	DLX2	NRG1					24	LGI4	ITGA6	HOXD8
25	FBN1	EDNRB	NRTN					25	LMO4	ITGAV	HOXD9
26	FHDC1	EGFLAM	PLK2					26	MEF2C	LAMB1	IER5L
27	FIGN	ERBB3	POSTN					27	MEGF10	LGI4	NRG1
28	FRMD3	ETS1	POU3F2					28	MOXD1	LMO4	NRTN
29	FRMD6	FAM198B	PTPRD					29	MPZ	MEF2C	POU3F2
30	GAS2L3	FGF12	SOX1					30	NGFR	MEGF10	PTPRD
31	GAS7	FIGN	SOX9					31	NID1	MOXD1	SOX1
32	GFRA1	FILIP1L	TBX15					32	NPR3	MPZ	SOX9
33	GPC3	FOXD3	TBX2					33	NRXN1	NGFR	TBX15
34	GPM6B	FOXD3-AS1	TGFA					34	PLAT	NID1	TGFA
35	GRIK2	FRMD6						35	PLP1	NPR3
36	GULP1	GAS7						36	PLS3	NRXN1
37	HMGA2	GFRA1						37	PLXDC2	PLAT
38	ID3	GPM6B						38	POSTN	PLK2
39	ID4	GULP1						39	PRIMA1	PLP1
40	IGSF11	HMGA2						40	PTN	PLS3
41	INSC	HOXA5						41	PTPRZ1	PLXDC2
42	ITGA4	ID2						42	S100B	POSTN
43	ITGA6	ID3						43	SASH1	PRIMA1
44	ITGAV	ID4						44	SLITRK6	PTN
45	KIAA1755	IFITM3						45	SPTBN1	PTPRZ1
46	LAMA2	IGFBP5						46	SSFA2	S100B
47	LAMB1	INSC						47	TBX2	SASH1
48	LGI4	ITGA6						48	TCF7L2	SLITRK6
49	LHFPL2	ITGAV						49	TGFBR2	SPTBN1
50	LMO4	KCTD12						50	UBL3	SSFA2
51	LPCAT2	LAMB1						51	VCL	TCF7L2
52	LSAMP	LAMB2						52	WLS	TGFBR2
53	MEF2C	LGALS3BP						53	ZEB2	UBL3
54	MEGF10	LGI4						54	ADAM12	VCL
55	MICAL3	LITAF						55	AFF3	WLS
56	MMP17	LMO4						56	ANTXR1	ZEB2
57	MOXD1	LPAR6						57	ARHGEF10	ABCA1
58	MPZ	MEF2C						58	CACHD1	ADGRG6
59	NAALADL2	MEGF10						59	CASC15	ADGRV1
60	NCAM2	MOXD1						60	CDK18	AHNAK
61	NGFR	MPG						61	COL19A1	ANXA1
62	NID1	MPZ						62	COL25A1	ARPC1B
63	NPR3	MRPS6						63	CPED1	ATP1A2
64	NRXN1	MXRA8						64	CYP27C1	BGN
65	PAG1	NGFR						65	DOCK10	CADM4
66	PALLD	NID1						66	ENC1	CDC42EP1
67	PCDH7	NPR3						67	ERBB4	CMTM5
68	PDZD2	NR4A1						68	FBN1	CNP
69	PDZRN3	NRXN1						69	FHDC1	CRTAP
70	PKD2	PACSIN3						70	FRMD3	CTGF
71	PLAT	PDLIM1						71	GAS2L3	CTSC
72	PLP1	PHLDA1						72	GPC3	DLC1
73	PLS3	PHLDA3						73	GRIK2	DLX2
74	PLXDC2	PLAT						74	IGSF11	EGFLAM
75	POSTN	PLK2						75	ITGA4	FAM198B
76	PPP2R2B	PLP1						76	KIAA1755	FILIP1L
77	PRDM16	PLPP1						77	LAMA2	FOXD3-AS1
78	PRICKLE1	PLS3						78	LHFPL2	ID2
79	PRIMA1	PLXDC2						79	LPCAT2	IFITM3
80	PTN	PMP2						80	LSAMP	IGFBP5
81	PTPRJ	POSTN						81	MICAL3	KCTD12
82	PTPRZ1	PRIMA1						82	MMP17	LAMB2
83	S100B	PTN						83	NAALADL2	LGALS3BP
84	SASH1	PTPRZ1						84	NCAM2	LITAF
85	SEMA3C	RHOB						85	PAG1	LPAR6
86	SHC4	S100A10						86	PALLD	MPG
87	SLITRK6	S100B						87	PCDH7	MRPS6
88	SNTB1	SASH1						88	PDZD2	MXRA8
89	SPTBN1	SFRP1						89	PDZRN3	NR4A1
90	SSFA2	SLITRK6						90	PKD2	PACSIN3
91	ST8SIA1	SPP1						91	PPP2R2B	PDLIM1
92	ST8SIA5	SPTBN1						92	PRDM16	PHLDA1
93	STARD13	SSFA2						93	PRICKLE1	PHLDA3
94	TBX2	TCF7L2						94	PTPRJ	PLPP1
95	TCF7L2	TFAP2A						95	SEMA3C	PMP2
96	TENM3	TGFBR2						96	SHC4	RHOB
97	TGFBR2	UBL3						97	SNTB1	S100A10
98	TMEM132B	VCL						98	ST8SIA1	SFRP1
99	UACA	WLS						99	ST8SIA5	SPP1
100	UBL3	ZEB2						100	STARD13	TFAP2A
101	USP53							101	TENM3
102	UST							102	TMEM132B
103	VCL							103	UACA
104	WLS							104	USP53
105	ZEB2							105	UST
106	ZNF521							106	ZNF521
Number of duplicates	106	100	36					Number of shared among three papers	53	56	8
Not Shared	588	598	660

[truncated: 1 more sheets: FC in those shared genes]
