# Supplementary material for: CD146-assisted isolation and multi-omics characterisation of human pluripotent stem cell derived cranial Schwann cell precursor-like cells.
Source: Research Square preprint supplement (doi:10.21203/rs.3.rs-3324198/v1), 2023-09-19
Supplement: Supplementary file 2 [file 098a4c8072bf2e3c8967789c.xlsx]

## Sheet: CelSeq2 primers
	Protocol	Primer name	Primer name	Vendor	oligo type	length [bp]	index	modifications	Primers in 5' -> 3' direction	Comments
	Cel-Seq2	RT primer (Hashimshony)	C-RT1	IDT	DNA	92	8 bp	no	CGATTGAGGCCGGTAATACGACTCACTATAGGGGTTCAGAGTTCTACAGTCCGACGATCCATCACGCTTTTTTTTTTTTTTTTTTTTTTTTV
	Cel-Seq2	randomhexRT primer	ranhex RT2	IDT	DNA	28	no	no	GCCTTGGCACCCGAGAATTCCANNNNNN
	Cel-Seq2	RNA PCR Primer (RP1), part # 15013198, P5	RP1	Illumina	DNA	50	no	no	AATGATACGGCGACCACCGAGATCTACACGTTCAGAGTTCTACAGTCCGA	Illumina small RNA kit
	Cel-Seq2	RNA PCR Primer, Index 1 (RPI1) , P7	RPix	Illumina	DNA	63	6 bp	no	CAAGCAGAAGACGGCATACGAGATCGTGATGTGACTGGAGTTCCTTGGCACCCGAGAATTCCA	Illumina small RNA kit
									T7 promotor
									partial sIllumina small RNA sequencing primer
									Index
									dT

## Sheet: C-RT1 primers
		CEL-Seq read structure
		Read1 - 14 bp : 6N (=UMI) + 8 bp index
		Read 2 - 77 bp: 6N (from random hexamer) followed by transcript
Well in 384	Primer name	RT1 index primers	index sequence (as in primer)	index #
A1	RT1-97	CGATTGAGGCCGGTAATACGACTCACTATAGGGGTTCAGAGTTCTACAGTCCGACGATCNNNNNNGTAGCTCATTTTTTTTTTTTTTTTTTTTTTTTV	GTAGCTCA	97
A2	RT1-98	CGATTGAGGCCGGTAATACGACTCACTATAGGGGTTCAGAGTTCTACAGTCCGACGATCNNNNNNTAGACCACTTTTTTTTTTTTTTTTTTTTTTTTV	TAGACCAC	98
A3	RT1-99	CGATTGAGGCCGGTAATACGACTCACTATAGGGGTTCAGAGTTCTACAGTCCGACGATCNNNNNNGGTCTATGTTTTTTTTTTTTTTTTTTTTTTTTV	GGTCTATG	99
A4	RT1-100	CGATTGAGGCCGGTAATACGACTCACTATAGGGGTTCAGAGTTCTACAGTCCGACGATCNNNNNNGTCCGAATTTTTTTTTTTTTTTTTTTTTTTTTV	GTCCGAAT	100
A5	RT1-101	CGATTGAGGCCGGTAATACGACTCACTATAGGGGTTCAGAGTTCTACAGTCCGACGATCNNNNNNTAGTGCGTTTTTTTTTTTTTTTTTTTTTTTTTV	TAGTGCGT	101
A6	RT1-102	CGATTGAGGCCGGTAATACGACTCACTATAGGGGTTCAGAGTTCTACAGTCCGACGATCNNNNNNGACTGTACTTTTTTTTTTTTTTTTTTTTTTTTV	GACTGTAC	102
A7	RT1-103	CGATTGAGGCCGGTAATACGACTCACTATAGGGGTTCAGAGTTCTACAGTCCGACGATCNNNNNNTCCAGTAGTTTTTTTTTTTTTTTTTTTTTTTTV	TCCAGTAG	103
A8	RT1-104	CGATTGAGGCCGGTAATACGACTCACTATAGGGGTTCAGAGTTCTACAGTCCGACGATCNNNNNNAGCGTTGTTTTTTTTTTTTTTTTTTTTTTTTTV	AGCGTTGT	104
A9	RT1-105	CGATTGAGGCCGGTAATACGACTCACTATAGGGGTTCAGAGTTCTACAGTCCGACGATCNNNNNNGATGCGTTTTTTTTTTTTTTTTTTTTTTTTTTV	GATGCGTT	105
A10	RT1-106	CGATTGAGGCCGGTAATACGACTCACTATAGGGGTTCAGAGTTCTACAGTCCGACGATCNNNNNNCCGTTAAGTTTTTTTTTTTTTTTTTTTTTTTTV	CCGTTAAG	106
A11	RT1-107	CGATTGAGGCCGGTAATACGACTCACTATAGGGGTTCAGAGTTCTACAGTCCGACGATCNNNNNNCAAGCCATTTTTTTTTTTTTTTTTTTTTTTTTV	CAAGCCAT	107
A12	RT1-108	CGATTGAGGCCGGTAATACGACTCACTATAGGGGTTCAGAGTTCTACAGTCCGACGATCNNNNNNCTCCAAGATTTTTTTTTTTTTTTTTTTTTTTTV	CTCCAAGA	108
A13	RT1-109	CGATTGAGGCCGGTAATACGACTCACTATAGGGGTTCAGAGTTCTACAGTCCGACGATCNNNNNNCTGCGTAATTTTTTTTTTTTTTTTTTTTTTTTV	CTGCGTAA	109
A14	RT1-110	CGATTGAGGCCGGTAATACGACTCACTATAGGGGTTCAGAGTTCTACAGTCCGACGATCNNNNNNGTCCAACATTTTTTTTTTTTTTTTTTTTTTTTV	GTCCAACA	110
A15	RT1-111	CGATTGAGGCCGGTAATACGACTCACTATAGGGGTTCAGAGTTCTACAGTCCGACGATCNNNNNNACTTGTGGTTTTTTTTTTTTTTTTTTTTTTTTV	ACTTGTGG	111
A16	RT1-112	CGATTGAGGCCGGTAATACGACTCACTATAGGGGTTCAGAGTTCTACAGTCCGACGATCNNNNNNAGCTCTGATTTTTTTTTTTTTTTTTTTTTTTTV	AGCTCTGA	112
A17	RT1-113	CGATTGAGGCCGGTAATACGACTCACTATAGGGGTTCAGAGTTCTACAGTCCGACGATCNNNNNNGCATTAGCTTTTTTTTTTTTTTTTTTTTTTTTV	GCATTAGC	113
A18	RT1-114	CGATTGAGGCCGGTAATACGACTCACTATAGGGGTTCAGAGTTCTACAGTCCGACGATCNNNNNNCCTATGAGTTTTTTTTTTTTTTTTTTTTTTTTV	CCTATGAG	114
A19	RT1-115	CGATTGAGGCCGGTAATACGACTCACTATAGGGGTTCAGAGTTCTACAGTCCGACGATCNNNNNNCAACGCTATTTTTTTTTTTTTTTTTTTTTTTTV	CAACGCTA	115
A20	RT1-116	CGATTGAGGCCGGTAATACGACTCACTATAGGGGTTCAGAGTTCTACAGTCCGACGATCNNNNNNGCATAGTCTTTTTTTTTTTTTTTTTTTTTTTTV	GCATAGTC	116
A21	RT1-117	CGATTGAGGCCGGTAATACGACTCACTATAGGGGTTCAGAGTTCTACAGTCCGACGATCNNNNNNTAGGTCACTTTTTTTTTTTTTTTTTTTTTTTTV	TAGGTCAC	117
A22	RT1-118	CGATTGAGGCCGGTAATACGACTCACTATAGGGGTTCAGAGTTCTACAGTCCGACGATCNNNNNNACTCAAGCTTTTTTTTTTTTTTTTTTTTTTTTV	ACTCAAGC	118
A23	RT1-119	CGATTGAGGCCGGTAATACGACTCACTATAGGGGTTCAGAGTTCTACAGTCCGACGATCNNNNNNTCACCGAATTTTTTTTTTTTTTTTTTTTTTTTV	TCACCGAA	119
A24	RT1-120	CGATTGAGGCCGGTAATACGACTCACTATAGGGGTTCAGAGTTCTACAGTCCGACGATCNNNNNNTCATGGACTTTTTTTTTTTTTTTTTTTTTTTTV	TCATGGAC	120
B1	RT1-121	CGATTGAGGCCGGTAATACGACTCACTATAGGGGTTCAGAGTTCTACAGTCCGACGATCNNNNNNGACTACTGTTTTTTTTTTTTTTTTTTTTTTTTV	GACTACTG	121
B2	RT1-122	CGATTGAGGCCGGTAATACGACTCACTATAGGGGTTCAGAGTTCTACAGTCCGACGATCNNNNNNAGTCTTGGTTTTTTTTTTTTTTTTTTTTTTTTV	AGTCTTGG	122
B3	RT1-123	CGATTGAGGCCGGTAATACGACTCACTATAGGGGTTCAGAGTTCTACAGTCCGACGATCNNNNNNAGCAGCTTTTTTTTTTTTTTTTTTTTTTTTTTV	AGCAGCTT	123
B4	RT1-124	CGATTGAGGCCGGTAATACGACTCACTATAGGGGTTCAGAGTTCTACAGTCCGACGATCNNNNNNTCACAGACTTTTTTTTTTTTTTTTTTTTTTTTV	TCACAGAC	124
B5	RT1-125	CGATTGAGGCCGGTAATACGACTCACTATAGGGGTTCAGAGTTCTACAGTCCGACGATCNNNNNNCCTGTAAGTTTTTTTTTTTTTTTTTTTTTTTTV	CCTGTAAG	125
B6	RT1-126	CGATTGAGGCCGGTAATACGACTCACTATAGGGGTTCAGAGTTCTACAGTCCGACGATCNNNNNNATGACTGCTTTTTTTTTTTTTTTTTTTTTTTTV	ATGACTGC	126
B7	RT1-127	CGATTGAGGCCGGTAATACGACTCACTATAGGGGTTCAGAGTTCTACAGTCCGACGATCNNNNNNCTCTCCTTTTTTTTTTTTTTTTTTTTTTTTTTV	CTCTCCTT	127
B8	RT1-128	CGATTGAGGCCGGTAATACGACTCACTATAGGGGTTCAGAGTTCTACAGTCCGACGATCNNNNNNCGTGTCAATTTTTTTTTTTTTTTTTTTTTTTTV	CGTGTCAA	128
B9	RT1-129	CGATTGAGGCCGGTAATACGACTCACTATAGGGGTTCAGAGTTCTACAGTCCGACGATCNNNNNNGCCTTAAGTTTTTTTTTTTTTTTTTTTTTTTTV	GCCTTAAG	129
B10	RT1-130	CGATTGAGGCCGGTAATACGACTCACTATAGGGGTTCAGAGTTCTACAGTCCGACGATCNNNNNNGCACGTATTTTTTTTTTTTTTTTTTTTTTTTTV	GCACGTAT	130
B11	RT1-131	CGATTGAGGCCGGTAATACGACTCACTATAGGGGTTCAGAGTTCTACAGTCCGACGATCNNNNNNCAACGTACTTTTTTTTTTTTTTTTTTTTTTTTV	CAACGTAC	131
B12	RT1-132	CGATTGAGGCCGGTAATACGACTCACTATAGGGGTTCAGAGTTCTACAGTCCGACGATCNNNNNNGCGTACATTTTTTTTTTTTTTTTTTTTTTTTTV	GCGTACAT	132
B13	RT1-133	CGATTGAGGCCGGTAATACGACTCACTATAGGGGTTCAGAGTTCTACAGTCCGACGATCNNNNNNTATCCAGGTTTTTTTTTTTTTTTTTTTTTTTTV	TATCCAGG	133
B14	RT1-134	CGATTGAGGCCGGTAATACGACTCACTATAGGGGTTCAGAGTTCTACAGTCCGACGATCNNNNNNCCGATATGTTTTTTTTTTTTTTTTTTTTTTTTV	CCGATATG	134
B15	RT1-135	CGATTGAGGCCGGTAATACGACTCACTATAGGGGTTCAGAGTTCTACAGTCCGACGATCNNNNNNGTGTTAGCTTTTTTTTTTTTTTTTTTTTTTTTV	GTGTTAGC	135
B16	RT1-136	CGATTGAGGCCGGTAATACGACTCACTATAGGGGTTCAGAGTTCTACAGTCCGACGATCNNNNNNGTGGTTGTTTTTTTTTTTTTTTTTTTTTTTTTV	GTGGTTGT	136
B17	RT1-137	CGATTGAGGCCGGTAATACGACTCACTATAGGGGTTCAGAGTTCTACAGTCCGACGATCNNNNNNGTTGCTGATTTTTTTTTTTTTTTTTTTTTTTTV	GTTGCTGA	137
B18	RT1-138	CGATTGAGGCCGGTAATACGACTCACTATAGGGGTTCAGAGTTCTACAGTCCGACGATCNNNNNNCCTGGATATTTTTTTTTTTTTTTTTTTTTTTTV	CCTGGATA	138
B19	RT1-139	CGATTGAGGCCGGTAATACGACTCACTATAGGGGTTCAGAGTTCTACAGTCCGACGATCNNNNNNACCGACATTTTTTTTTTTTTTTTTTTTTTTTTV	ACCGACAT	139
B20	RT1-140	CGATTGAGGCCGGTAATACGACTCACTATAGGGGTTCAGAGTTCTACAGTCCGACGATCNNNNNNATGCTGACTTTTTTTTTTTTTTTTTTTTTTTTV	ATGCTGAC	140
B21	RT1-141	CGATTGAGGCCGGTAATACGACTCACTATAGGGGTTCAGAGTTCTACAGTCCGACGATCNNNNNNTACTGGCATTTTTTTTTTTTTTTTTTTTTTTTV	TACTGGCA	141
B22	RT1-142	CGATTGAGGCCGGTAATACGACTCACTATAGGGGTTCAGAGTTCTACAGTCCGACGATCNNNNNNCAGTCATGTTTTTTTTTTTTTTTTTTTTTTTTV	CAGTCATG	142
B23	RT1-143	CGATTGAGGCCGGTAATACGACTCACTATAGGGGTTCAGAGTTCTACAGTCCGACGATCNNNNNNGTGATTCGTTTTTTTTTTTTTTTTTTTTTTTTV	GTGATTCG	143
B24	RT1-144	CGATTGAGGCCGGTAATACGACTCACTATAGGGGTTCAGAGTTCTACAGTCCGACGATCNNNNNNCGCATGTATTTTTTTTTTTTTTTTTTTTTTTTV	CGCATGTA	144
C1	RT1-145	CGATTGAGGCCGGTAATACGACTCACTATAGGGGTTCAGAGTTCTACAGTCCGACGATCNNNNNNAGTGTGCTTTTTTTTTTTTTTTTTTTTTTTTTV	AGTGTGCT	145
C2	RT1-146	CGATTGAGGCCGGTAATACGACTCACTATAGGGGTTCAGAGTTCTACAGTCCGACGATCNNNNNNTGTCGCAATTTTTTTTTTTTTTTTTTTTTTTTV	TGTCGCAA	146
C3	RT1-147	CGATTGAGGCCGGTAATACGACTCACTATAGGGGTTCAGAGTTCTACAGTCCGACGATCNNNNNNGGACTTACTTTTTTTTTTTTTTTTTTTTTTTTV	GGACTTAC	147
C4	RT1-148	CGATTGAGGCCGGTAATACGACTCACTATAGGGGTTCAGAGTTCTACAGTCCGACGATCNNNNNNCTATCGGATTTTTTTTTTTTTTTTTTTTTTTTV	CTATCGGA	148
C5	RT1-149	CGATTGAGGCCGGTAATACGACTCACTATAGGGGTTCAGAGTTCTACAGTCCGACGATCNNNNNNACGCGTTATTTTTTTTTTTTTTTTTTTTTTTTV	ACGCGTTA	149
C6	RT1-150	CGATTGAGGCCGGTAATACGACTCACTATAGGGGTTCAGAGTTCTACAGTCCGACGATCNNNNNNTACGCTGATTTTTTTTTTTTTTTTTTTTTTTTV	TACGCTGA	150
C7	RT1-151	CGATTGAGGCCGGTAATACGACTCACTATAGGGGTTCAGAGTTCTACAGTCCGACGATCNNNNNNACTACACGTTTTTTTTTTTTTTTTTTTTTTTTV	ACTACACG	151
C8	RT1-152	CGATTGAGGCCGGTAATACGACTCACTATAGGGGTTCAGAGTTCTACAGTCCGACGATCNNNNNNATCACGACTTTTTTTTTTTTTTTTTTTTTTTTV	ATCACGAC	152
C9	RT1-153	CGATTGAGGCCGGTAATACGACTCACTATAGGGGTTCAGAGTTCTACAGTCCGACGATCNNNNNNCATCAAGCTTTTTTTTTTTTTTTTTTTTTTTTV	CATCAAGC	153
C10	RT1-154	CGATTGAGGCCGGTAATACGACTCACTATAGGGGTTCAGAGTTCTACAGTCCGACGATCNNNNNNACTGTTGGTTTTTTTTTTTTTTTTTTTTTTTTV	ACTGTTGG	154
C11	RT1-155	CGATTGAGGCCGGTAATACGACTCACTATAGGGGTTCAGAGTTCTACAGTCCGACGATCNNNNNNTCAGTGCATTTTTTTTTTTTTTTTTTTTTTTTV	TCAGTGCA	155
C12	RT1-156	CGATTGAGGCCGGTAATACGACTCACTATAGGGGTTCAGAGTTCTACAGTCCGACGATCNNNNNNGCGATATCTTTTTTTTTTTTTTTTTTTTTTTTV	GCGATATC	156
C13	RT1-157	CGATTGAGGCCGGTAATACGACTCACTATAGGGGTTCAGAGTTCTACAGTCCGACGATCNNNNNNTGCGTAGTTTTTTTTTTTTTTTTTTTTTTTTTV	TGCGTAGT	157
C14	RT1-158	CGATTGAGGCCGGTAATACGACTCACTATAGGGGTTCAGAGTTCTACAGTCCGACGATCNNNNNNGCTAGTGTTTTTTTTTTTTTTTTTTTTTTTTTV	GCTAGTGT	158
C15	RT1-159	CGATTGAGGCCGGTAATACGACTCACTATAGGGGTTCAGAGTTCTACAGTCCGACGATCNNNNNNCTCACGAATTTTTTTTTTTTTTTTTTTTTTTTV	CTCACGAA	159
C16	RT1-160	CGATTGAGGCCGGTAATACGACTCACTATAGGGGTTCAGAGTTCTACAGTCCGACGATCNNNNNNAGTCACGTTTTTTTTTTTTTTTTTTTTTTTTTV	AGTCACGT	160
C17	RT1-161	CGATTGAGGCCGGTAATACGACTCACTATAGGGGTTCAGAGTTCTACAGTCCGACGATCNNNNNNCACGGTATTTTTTTTTTTTTTTTTTTTTTTTTV	CACGGTAT	161
C18	RT1-162	CGATTGAGGCCGGTAATACGACTCACTATAGGGGTTCAGAGTTCTACAGTCCGACGATCNNNNNNGGCACTTATTTTTTTTTTTTTTTTTTTTTTTTV	GGCACTTA	162
C19	RT1-163	CGATTGAGGCCGGTAATACGACTCACTATAGGGGTTCAGAGTTCTACAGTCCGACGATCNNNNNNTGCACGTATTTTTTTTTTTTTTTTTTTTTTTTV	TGCACGTA	163
C20	RT1-164	CGATTGAGGCCGGTAATACGACTCACTATAGGGGTTCAGAGTTCTACAGTCCGACGATCNNNNNNGGTTATGCTTTTTTTTTTTTTTTTTTTTTTTTV	GGTTATGC	164
C21	RT1-165	CGATTGAGGCCGGTAATACGACTCACTATAGGGGTTCAGAGTTCTACAGTCCGACGATCNNNNNNTGACTCAGTTTTTTTTTTTTTTTTTTTTTTTTV	TGACTCAG	165
C22	RT1-166	CGATTGAGGCCGGTAATACGACTCACTATAGGGGTTCAGAGTTCTACAGTCCGACGATCNNNNNNGACCATCATTTTTTTTTTTTTTTTTTTTTTTTV	GACCATCA	166
C23	RT1-167	CGATTGAGGCCGGTAATACGACTCACTATAGGGGTTCAGAGTTCTACAGTCCGACGATCNNNNNNTCCTCTTCTTTTTTTTTTTTTTTTTTTTTTTTV	TCCTCTTC	167
C24	RT1-168	CGATTGAGGCCGGTAATACGACTCACTATAGGGGTTCAGAGTTCTACAGTCCGACGATCNNNNNNACTGTGACTTTTTTTTTTTTTTTTTTTTTTTTV	ACTGTGAC	168
D1	RT1-169	CGATTGAGGCCGGTAATACGACTCACTATAGGGGTTCAGAGTTCTACAGTCCGACGATCNNNNNNACAACGTCTTTTTTTTTTTTTTTTTTTTTTTTV	ACAACGTC	169
D2	RT1-170	CGATTGAGGCCGGTAATACGACTCACTATAGGGGTTCAGAGTTCTACAGTCCGACGATCNNNNNNCCATCAAGTTTTTTTTTTTTTTTTTTTTTTTTV	CCATCAAG	170
D3	RT1-171	CGATTGAGGCCGGTAATACGACTCACTATAGGGGTTCAGAGTTCTACAGTCCGACGATCNNNNNNATTGCGTGTTTTTTTTTTTTTTTTTTTTTTTTV	ATTGCGTG	171
D4	RT1-172	CGATTGAGGCCGGTAATACGACTCACTATAGGGGTTCAGAGTTCTACAGTCCGACGATCNNNNNNCTACGCAATTTTTTTTTTTTTTTTTTTTTTTTV	CTACGCAA	172
D5	RT1-173	CGATTGAGGCCGGTAATACGACTCACTATAGGGGTTCAGAGTTCTACAGTCCGACGATCNNNNNNGCTAAGCTTTTTTTTTTTTTTTTTTTTTTTTTV	GCTAAGCT	173
D6	RT1-174	CGATTGAGGCCGGTAATACGACTCACTATAGGGGTTCAGAGTTCTACAGTCCGACGATCNNNNNNATGCCAGTTTTTTTTTTTTTTTTTTTTTTTTTV	ATGCCAGT	174
D7	RT1-175	CGATTGAGGCCGGTAATACGACTCACTATAGGGGTTCAGAGTTCTACAGTCCGACGATCNNNNNNCATCCAGATTTTTTTTTTTTTTTTTTTTTTTTV	CATCCAGA	175
D8	RT1-176	CGATTGAGGCCGGTAATACGACTCACTATAGGGGTTCAGAGTTCTACAGTCCGACGATCNNNNNNGACTACCATTTTTTTTTTTTTTTTTTTTTTTTV	GACTACCA	176
D9	RT1-177	CGATTGAGGCCGGTAATACGACTCACTATAGGGGTTCAGAGTTCTACAGTCCGACGATCNNNNNNCAGTGCTATTTTTTTTTTTTTTTTTTTTTTTTV	CAGTGCTA	177
D10	RT1-178	CGATTGAGGCCGGTAATACGACTCACTATAGGGGTTCAGAGTTCTACAGTCCGACGATCNNNNNNCGTGAATCTTTTTTTTTTTTTTTTTTTTTTTTV	CGTGAATC	178
D11	RT1-179	CGATTGAGGCCGGTAATACGACTCACTATAGGGGTTCAGAGTTCTACAGTCCGACGATCNNNNNNGGTAACTCTTTTTTTTTTTTTTTTTTTTTTTTV	GGTAACTC	179
D12	RT1-180	CGATTGAGGCCGGTAATACGACTCACTATAGGGGTTCAGAGTTCTACAGTCCGACGATCNNNNNNCACTAGCATTTTTTTTTTTTTTTTTTTTTTTTV	CACTAGCA	180
D13	RT1-181	CGATTGAGGCCGGTAATACGACTCACTATAGGGGTTCAGAGTTCTACAGTCCGACGATCNNNNNNGATACTGCTTTTTTTTTTTTTTTTTTTTTTTTV	GATACTGC	181
D14	RT1-182	CGATTGAGGCCGGTAATACGACTCACTATAGGGGTTCAGAGTTCTACAGTCCGACGATCNNNNNNGTGCGTTATTTTTTTTTTTTTTTTTTTTTTTTV	GTGCGTTA	182
D15	RT1-183	CGATTGAGGCCGGTAATACGACTCACTATAGGGGTTCAGAGTTCTACAGTCCGACGATCNNNNNNGGATGCTTTTTTTTTTTTTTTTTTTTTTTTTTV	GGATGCTT	183
D16	RT1-184	CGATTGAGGCCGGTAATACGACTCACTATAGGGGTTCAGAGTTCTACAGTCCGACGATCNNNNNNTCAGGTGTTTTTTTTTTTTTTTTTTTTTTTTTV	TCAGGTGT	184
D17	RT1-185	CGATTGAGGCCGGTAATACGACTCACTATAGGGGTTCAGAGTTCTACAGTCCGACGATCNNNNNNTAGCTCAGTTTTTTTTTTTTTTTTTTTTTTTTV	TAGCTCAG	185
D18	RT1-186	CGATTGAGGCCGGTAATACGACTCACTATAGGGGTTCAGAGTTCTACAGTCCGACGATCNNNNNNTAGCGATCTTTTTTTTTTTTTTTTTTTTTTTTV	TAGCGATC	186
D19	RT1-187	CGATTGAGGCCGGTAATACGACTCACTATAGGGGTTCAGAGTTCTACAGTCCGACGATCNNNNNNCCTAGTAGTTTTTTTTTTTTTTTTTTTTTTTTV	CCTAGTAG	187
D20	RT1-188	CGATTGAGGCCGGTAATACGACTCACTATAGGGGTTCAGAGTTCTACAGTCCGACGATCNNNNNNCAGCTTAGTTTTTTTTTTTTTTTTTTTTTTTTV	CAGCTTAG	188
D21	RT1-189	CGATTGAGGCCGGTAATACGACTCACTATAGGGGTTCAGAGTTCTACAGTCCGACGATCNNNNNNAGGTTCCATTTTTTTTTTTTTTTTTTTTTTTTV	AGGTTCCA	189
D22	RT1-190	CGATTGAGGCCGGTAATACGACTCACTATAGGGGTTCAGAGTTCTACAGTCCGACGATCNNNNNNTGGCGATTTTTTTTTTTTTTTTTTTTTTTTTTV	TGGCGATT	190
D23	RT1-191	CGATTGAGGCCGGTAATACGACTCACTATAGGGGTTCAGAGTTCTACAGTCCGACGATCNNNNNNACCAATCGTTTTTTTTTTTTTTTTTTTTTTTTV	ACCAATCG	191
D24	RT1-192	CGATTGAGGCCGGTAATACGACTCACTATAGGGGTTCAGAGTTCTACAGTCCGACGATCNNNNNNGAAGGAAGTTTTTTTTTTTTTTTTTTTTTTTTV	GAAGGAAG	192
E1	RT1-193	CGATTGAGGCCGGTAATACGACTCACTATAGGGGTTCAGAGTTCTACAGTCCGACGATCNNNNNNTGGTCGATTTTTTTTTTTTTTTTTTTTTTTTTV	TGGTCGAT	193
E2	RT1-194	CGATTGAGGCCGGTAATACGACTCACTATAGGGGTTCAGAGTTCTACAGTCCGACGATCNNNNNNTGCGACTATTTTTTTTTTTTTTTTTTTTTTTTV	TGCGACTA	194
E3	RT1-195	CGATTGAGGCCGGTAATACGACTCACTATAGGGGTTCAGAGTTCTACAGTCCGACGATCNNNNNNTGACTACGTTTTTTTTTTTTTTTTTTTTTTTTV	TGACTACG	195
E4	RT1-196	CGATTGAGGCCGGTAATACGACTCACTATAGGGGTTCAGAGTTCTACAGTCCGACGATCNNNNNNGGCATGTTTTTTTTTTTTTTTTTTTTTTTTTTV	GGCATGTT	196
E5	RT1-197	CGATTGAGGCCGGTAATACGACTCACTATAGGGGTTCAGAGTTCTACAGTCCGACGATCNNNNNNACGATGTCTTTTTTTTTTTTTTTTTTTTTTTTV	ACGATGTC	197
E6	RT1-198	CGATTGAGGCCGGTAATACGACTCACTATAGGGGTTCAGAGTTCTACAGTCCGACGATCNNNNNNGTACTTGGTTTTTTTTTTTTTTTTTTTTTTTTV	GTACTTGG	198
E7	RT1-199	CGATTGAGGCCGGTAATACGACTCACTATAGGGGTTCAGAGTTCTACAGTCCGACGATCNNNNNNTAGGTGCTTTTTTTTTTTTTTTTTTTTTTTTTV	TAGGTGCT	199
E8	RT1-200	CGATTGAGGCCGGTAATACGACTCACTATAGGGGTTCAGAGTTCTACAGTCCGACGATCNNNNNNAGCTTGCATTTTTTTTTTTTTTTTTTTTTTTTV	AGCTTGCA	200
E9	RT1-201	CGATTGAGGCCGGTAATACGACTCACTATAGGGGTTCAGAGTTCTACAGTCCGACGATCNNNNNNAGTGACTCTTTTTTTTTTTTTTTTTTTTTTTTV	AGTGACTC	201
E10	RT1-202	CGATTGAGGCCGGTAATACGACTCACTATAGGGGTTCAGAGTTCTACAGTCCGACGATCNNNNNNTACGAGTCTTTTTTTTTTTTTTTTTTTTTTTTV	TACGAGTC	202
E11	RT1-203	CGATTGAGGCCGGTAATACGACTCACTATAGGGGTTCAGAGTTCTACAGTCCGACGATCNNNNNNGTGCGTATTTTTTTTTTTTTTTTTTTTTTTTTV	GTGCGTAT	203
E12	RT1-204	CGATTGAGGCCGGTAATACGACTCACTATAGGGGTTCAGAGTTCTACAGTCCGACGATCNNNNNNCGACACATTTTTTTTTTTTTTTTTTTTTTTTTV	CGACACAT	204
E13	RT1-205	CGATTGAGGCCGGTAATACGACTCACTATAGGGGTTCAGAGTTCTACAGTCCGACGATCNNNNNNTCGACTAGTTTTTTTTTTTTTTTTTTTTTTTTV	TCGACTAG	205
E14	RT1-206	CGATTGAGGCCGGTAATACGACTCACTATAGGGGTTCAGAGTTCTACAGTCCGACGATCNNNNNNTCACGGTATTTTTTTTTTTTTTTTTTTTTTTTV	TCACGGTA	206
E15	RT1-207	CGATTGAGGCCGGTAATACGACTCACTATAGGGGTTCAGAGTTCTACAGTCCGACGATCNNNNNNATGGTGCTTTTTTTTTTTTTTTTTTTTTTTTTV	ATGGTGCT	207
E16	RT1-208	CGATTGAGGCCGGTAATACGACTCACTATAGGGGTTCAGAGTTCTACAGTCCGACGATCNNNNNNGTACTGTGTTTTTTTTTTTTTTTTTTTTTTTTV	GTACTGTG	208
E17	RT1-209	CGATTGAGGCCGGTAATACGACTCACTATAGGGGTTCAGAGTTCTACAGTCCGACGATCNNNNNNCGATTGTGTTTTTTTTTTTTTTTTTTTTTTTTV	CGATTGTG	209
E18	RT1-210	CGATTGAGGCCGGTAATACGACTCACTATAGGGGTTCAGAGTTCTACAGTCCGACGATCNNNNNNCACAAGTCTTTTTTTTTTTTTTTTTTTTTTTTV	CACAAGTC	210
E19	RT1-211	CGATTGAGGCCGGTAATACGACTCACTATAGGGGTTCAGAGTTCTACAGTCCGACGATCNNNNNNCAACTGACTTTTTTTTTTTTTTTTTTTTTTTTV	CAACTGAC	211
E20	RT1-212	CGATTGAGGCCGGTAATACGACTCACTATAGGGGTTCAGAGTTCTACAGTCCGACGATCNNNNNNTCGTTGGATTTTTTTTTTTTTTTTTTTTTTTTV	TCGTTGGA	212
E21	RT1-213	CGATTGAGGCCGGTAATACGACTCACTATAGGGGTTCAGAGTTCTACAGTCCGACGATCNNNNNNTGAGTTGCTTTTTTTTTTTTTTTTTTTTTTTTV	TGAGTTGC	213
E22	RT1-214	CGATTGAGGCCGGTAATACGACTCACTATAGGGGTTCAGAGTTCTACAGTCCGACGATCNNNNNNTCTCGGAATTTTTTTTTTTTTTTTTTTTTTTTV	TCTCGGAA	214
E23	RT1-215	CGATTGAGGCCGGTAATACGACTCACTATAGGGGTTCAGAGTTCTACAGTCCGACGATCNNNNNNCGACTACATTTTTTTTTTTTTTTTTTTTTTTTV	CGACTACA	215
E24	RT1-216	CGATTGAGGCCGGTAATACGACTCACTATAGGGGTTCAGAGTTCTACAGTCCGACGATCNNNNNNATCCGTAGTTTTTTTTTTTTTTTTTTTTTTTTV	ATCCGTAG	216
F1	RT1-217	CGATTGAGGCCGGTAATACGACTCACTATAGGGGTTCAGAGTTCTACAGTCCGACGATCNNNNNNATTCGCAGTTTTTTTTTTTTTTTTTTTTTTTTV	ATTCGCAG	217
F2	RT1-218	CGATTGAGGCCGGTAATACGACTCACTATAGGGGTTCAGAGTTCTACAGTCCGACGATCNNNNNNTAACCGTGTTTTTTTTTTTTTTTTTTTTTTTTV	TAACCGTG	218
F3	RT1-219	CGATTGAGGCCGGTAATACGACTCACTATAGGGGTTCAGAGTTCTACAGTCCGACGATCNNNNNNAGGAGGAATTTTTTTTTTTTTTTTTTTTTTTTV	AGGAGGAA	219
F4	RT1-220	CGATTGAGGCCGGTAATACGACTCACTATAGGGGTTCAGAGTTCTACAGTCCGACGATCNNNNNNGTCGCTAATTTTTTTTTTTTTTTTTTTTTTTTV	GTCGCTAA	220
F5	RT1-221	CGATTGAGGCCGGTAATACGACTCACTATAGGGGTTCAGAGTTCTACAGTCCGACGATCNNNNNNATAGGCTCTTTTTTTTTTTTTTTTTTTTTTTTV	ATAGGCTC	221
F6	RT1-222	CGATTGAGGCCGGTAATACGACTCACTATAGGGGTTCAGAGTTCTACAGTCCGACGATCNNNNNNGAGAGGAATTTTTTTTTTTTTTTTTTTTTTTTV	GAGAGGAA	222
F7	RT1-223	CGATTGAGGCCGGTAATACGACTCACTATAGGGGTTCAGAGTTCTACAGTCCGACGATCNNNNNNACACAGCTTTTTTTTTTTTTTTTTTTTTTTTTV	ACACAGCT	223
F8	RT1-224	CGATTGAGGCCGGTAATACGACTCACTATAGGGGTTCAGAGTTCTACAGTCCGACGATCNNNNNNCGACGTATTTTTTTTTTTTTTTTTTTTTTTTTV	CGACGTAT	224
F9	RT1-225	CGATTGAGGCCGGTAATACGACTCACTATAGGGGTTCAGAGTTCTACAGTCCGACGATCNNNNNNACATGCCATTTTTTTTTTTTTTTTTTTTTTTTV	ACATGCCA	225
F10	RT1-226	CGATTGAGGCCGGTAATACGACTCACTATAGGGGTTCAGAGTTCTACAGTCCGACGATCNNNNNNGTTCCAAGTTTTTTTTTTTTTTTTTTTTTTTTV	GTTCCAAG	226
F11	RT1-227	CGATTGAGGCCGGTAATACGACTCACTATAGGGGTTCAGAGTTCTACAGTCCGACGATCNNNNNNGCGTGATTTTTTTTTTTTTTTTTTTTTTTTTTV	GCGTGATT	227
F12	RT1-228	CGATTGAGGCCGGTAATACGACTCACTATAGGGGTTCAGAGTTCTACAGTCCGACGATCNNNNNNTGATGCTGTTTTTTTTTTTTTTTTTTTTTTTTV	TGATGCTG	228
F13	RT1-229	CGATTGAGGCCGGTAATACGACTCACTATAGGGGTTCAGAGTTCTACAGTCCGACGATCNNNNNNTACCGATGTTTTTTTTTTTTTTTTTTTTTTTTV	TACCGATG	229
F14	RT1-230	CGATTGAGGCCGGTAATACGACTCACTATAGGGGTTCAGAGTTCTACAGTCCGACGATCNNNNNNTACAGGCTTTTTTTTTTTTTTTTTTTTTTTTTV	TACAGGCT	230
F15	RT1-231	CGATTGAGGCCGGTAATACGACTCACTATAGGGGTTCAGAGTTCTACAGTCCGACGATCNNNNNNAGCTTACGTTTTTTTTTTTTTTTTTTTTTTTTV	AGCTTACG	231
F16	RT1-232	CGATTGAGGCCGGTAATACGACTCACTATAGGGGTTCAGAGTTCTACAGTCCGACGATCNNNNNNGAGTTCCATTTTTTTTTTTTTTTTTTTTTTTTV	GAGTTCCA	232
F17	RT1-233	CGATTGAGGCCGGTAATACGACTCACTATAGGGGTTCAGAGTTCTACAGTCCGACGATCNNNNNNGCTGCATATTTTTTTTTTTTTTTTTTTTTTTTV	GCTGCATA	233
F18	RT1-234	CGATTGAGGCCGGTAATACGACTCACTATAGGGGTTCAGAGTTCTACAGTCCGACGATCNNNNNNTACCACGATTTTTTTTTTTTTTTTTTTTTTTTV	TACCACGA	234
F19	RT1-235	CGATTGAGGCCGGTAATACGACTCACTATAGGGGTTCAGAGTTCTACAGTCCGACGATCNNNNNNACACACGTTTTTTTTTTTTTTTTTTTTTTTTTV	ACACACGT	235
F20	RT1-236	CGATTGAGGCCGGTAATACGACTCACTATAGGGGTTCAGAGTTCTACAGTCCGACGATCNNNNNNCTGCAACATTTTTTTTTTTTTTTTTTTTTTTTV	CTGCAACA	236
F21	RT1-237	CGATTGAGGCCGGTAATACGACTCACTATAGGGGTTCAGAGTTCTACAGTCCGACGATCNNNNNNGTAGACCTTTTTTTTTTTTTTTTTTTTTTTTTV	GTAGACCT	237
F22	RT1-238	CGATTGAGGCCGGTAATACGACTCACTATAGGGGTTCAGAGTTCTACAGTCCGACGATCNNNNNNTGCCAGTATTTTTTTTTTTTTTTTTTTTTTTTV	TGCCAGTA	238
F23	RT1-239	CGATTGAGGCCGGTAATACGACTCACTATAGGGGTTCAGAGTTCTACAGTCCGACGATCNNNNNNAGCGTTACTTTTTTTTTTTTTTTTTTTTTTTTV	AGCGTTAC	239
F24	RT1-240	CGATTGAGGCCGGTAATACGACTCACTATAGGGGTTCAGAGTTCTACAGTCCGACGATCNNNNNNGTAGTCCATTTTTTTTTTTTTTTTTTTTTTTTV	GTAGTCCA	240
G1	RT1-241	CGATTGAGGCCGGTAATACGACTCACTATAGGGGTTCAGAGTTCTACAGTCCGACGATCNNNNNNGGCTAATCTTTTTTTTTTTTTTTTTTTTTTTTV	GGCTAATC	241
G2	RT1-242	CGATTGAGGCCGGTAATACGACTCACTATAGGGGTTCAGAGTTCTACAGTCCGACGATCNNNNNNCACGAGTTTTTTTTTTTTTTTTTTTTTTTTTTV	CACGAGTT	242
G3	RT1-243	CGATTGAGGCCGGTAATACGACTCACTATAGGGGTTCAGAGTTCTACAGTCCGACGATCNNNNNNCGAACTGTTTTTTTTTTTTTTTTTTTTTTTTTV	CGAACTGT	243
G4	RT1-244	CGATTGAGGCCGGTAATACGACTCACTATAGGGGTTCAGAGTTCTACAGTCCGACGATCNNNNNNGATTCGCATTTTTTTTTTTTTTTTTTTTTTTTV	GATTCGCA	244
G5	RT1-245	CGATTGAGGCCGGTAATACGACTCACTATAGGGGTTCAGAGTTCTACAGTCCGACGATCNNNNNNACCGTTAGTTTTTTTTTTTTTTTTTTTTTTTTV	ACCGTTAG	245
G6	RT1-246	CGATTGAGGCCGGTAATACGACTCACTATAGGGGTTCAGAGTTCTACAGTCCGACGATCNNNNNNCCGATAGTTTTTTTTTTTTTTTTTTTTTTTTTV	CCGATAGT	246
G7	RT1-247	CGATTGAGGCCGGTAATACGACTCACTATAGGGGTTCAGAGTTCTACAGTCCGACGATCNNNNNNGAATCGTCTTTTTTTTTTTTTTTTTTTTTTTTV	GAATCGTC	247
G8	RT1-248	CGATTGAGGCCGGTAATACGACTCACTATAGGGGTTCAGAGTTCTACAGTCCGACGATCNNNNNNGTAGGTCTTTTTTTTTTTTTTTTTTTTTTTTTV	GTAGGTCT	248
G9	RT1-249	CGATTGAGGCCGGTAATACGACTCACTATAGGGGTTCAGAGTTCTACAGTCCGACGATCNNNNNNGATTCGGTTTTTTTTTTTTTTTTTTTTTTTTTV	GATTCGGT	249
G10	RT1-250	CGATTGAGGCCGGTAATACGACTCACTATAGGGGTTCAGAGTTCTACAGTCCGACGATCNNNNNNTGGCATCATTTTTTTTTTTTTTTTTTTTTTTTV	TGGCATCA	250
G11	RT1-251	CGATTGAGGCCGGTAATACGACTCACTATAGGGGTTCAGAGTTCTACAGTCCGACGATCNNNNNNGTTGTGACTTTTTTTTTTTTTTTTTTTTTTTTV	GTTGTGAC	251
G12	RT1-252	CGATTGAGGCCGGTAATACGACTCACTATAGGGGTTCAGAGTTCTACAGTCCGACGATCNNNNNNGTGTAGCTTTTTTTTTTTTTTTTTTTTTTTTTV	GTGTAGCT	252
G13	RT1-253	CGATTGAGGCCGGTAATACGACTCACTATAGGGGTTCAGAGTTCTACAGTCCGACGATCNNNNNNGGTCAATCTTTTTTTTTTTTTTTTTTTTTTTTV	GGTCAATC	253
G14	RT1-254	CGATTGAGGCCGGTAATACGACTCACTATAGGGGTTCAGAGTTCTACAGTCCGACGATCNNNNNNTGTCGATGTTTTTTTTTTTTTTTTTTTTTTTTV	TGTCGATG	254
G15	RT1-255	CGATTGAGGCCGGTAATACGACTCACTATAGGGGTTCAGAGTTCTACAGTCCGACGATCNNNNNNCCAACTAGTTTTTTTTTTTTTTTTTTTTTTTTV	CCAACTAG	255
G16	RT1-256	CGATTGAGGCCGGTAATACGACTCACTATAGGGGTTCAGAGTTCTACAGTCCGACGATCNNNNNNAATCCGCATTTTTTTTTTTTTTTTTTTTTTTTV	AATCCGCA	256
G17	RT1-257	CGATTGAGGCCGGTAATACGACTCACTATAGGGGTTCAGAGTTCTACAGTCCGACGATCNNNNNNGCTACAACTTTTTTTTTTTTTTTTTTTTTTTTV	GCTACAAC	257
G18	RT1-258	CGATTGAGGCCGGTAATACGACTCACTATAGGGGTTCAGAGTTCTACAGTCCGACGATCNNNNNNCGATTCAGTTTTTTTTTTTTTTTTTTTTTTTTV	CGATTCAG	258
G19	RT1-259	CGATTGAGGCCGGTAATACGACTCACTATAGGGGTTCAGAGTTCTACAGTCCGACGATCNNNNNNGTACGACTTTTTTTTTTTTTTTTTTTTTTTTTV	GTACGACT	259
G20	RT1-260	CGATTGAGGCCGGTAATACGACTCACTATAGGGGTTCAGAGTTCTACAGTCCGACGATCNNNNNNCGACATACTTTTTTTTTTTTTTTTTTTTTTTTV	CGACATAC	260
G21	RT1-261	CGATTGAGGCCGGTAATACGACTCACTATAGGGGTTCAGAGTTCTACAGTCCGACGATCNNNNNNATAGCGTCTTTTTTTTTTTTTTTTTTTTTTTTV	ATAGCGTC	261
G22	RT1-262	CGATTGAGGCCGGTAATACGACTCACTATAGGGGTTCAGAGTTCTACAGTCCGACGATCNNNNNNAACCAGTCTTTTTTTTTTTTTTTTTTTTTTTTV	AACCAGTC	262
G23	RT1-263	CGATTGAGGCCGGTAATACGACTCACTATAGGGGTTCAGAGTTCTACAGTCCGACGATCNNNNNNGGCTTAACTTTTTTTTTTTTTTTTTTTTTTTTV	GGCTTAAC	263
G24	RT1-264	CGATTGAGGCCGGTAATACGACTCACTATAGGGGTTCAGAGTTCTACAGTCCGACGATCNNNNNNACAGCTACTTTTTTTTTTTTTTTTTTTTTTTTV	ACAGCTAC	264
H1	RT1-265	CGATTGAGGCCGGTAATACGACTCACTATAGGGGTTCAGAGTTCTACAGTCCGACGATCNNNNNNTGCACTGATTTTTTTTTTTTTTTTTTTTTTTTV	TGCACTGA	265
H2	RT1-266	CGATTGAGGCCGGTAATACGACTCACTATAGGGGTTCAGAGTTCTACAGTCCGACGATCNNNNNNGTTGCGATTTTTTTTTTTTTTTTTTTTTTTTTV	GTTGCGAT	266
H3	RT1-267	CGATTGAGGCCGGTAATACGACTCACTATAGGGGTTCAGAGTTCTACAGTCCGACGATCNNNNNNCGAATCGTTTTTTTTTTTTTTTTTTTTTTTTTV	CGAATCGT	267
H4	RT1-268	CGATTGAGGCCGGTAATACGACTCACTATAGGGGTTCAGAGTTCTACAGTCCGACGATCNNNNNNGTGCATGTTTTTTTTTTTTTTTTTTTTTTTTTV	GTGCATGT	268
H5	RT1-269	CGATTGAGGCCGGTAATACGACTCACTATAGGGGTTCAGAGTTCTACAGTCCGACGATCNNNNNNAGTTGCTGTTTTTTTTTTTTTTTTTTTTTTTTV	AGTTGCTG	269
H6	RT1-270	CGATTGAGGCCGGTAATACGACTCACTATAGGGGTTCAGAGTTCTACAGTCCGACGATCNNNNNNGTAACGCTTTTTTTTTTTTTTTTTTTTTTTTTV	GTAACGCT	270
H7	RT1-271	CGATTGAGGCCGGTAATACGACTCACTATAGGGGTTCAGAGTTCTACAGTCCGACGATCNNNNNNCGAACACTTTTTTTTTTTTTTTTTTTTTTTTTV	CGAACACT	271
H8	RT1-272	CGATTGAGGCCGGTAATACGACTCACTATAGGGGTTCAGAGTTCTACAGTCCGACGATCNNNNNNGGAACTCTTTTTTTTTTTTTTTTTTTTTTTTTV	GGAACTCT	272
H9	RT1-273	CGATTGAGGCCGGTAATACGACTCACTATAGGGGTTCAGAGTTCTACAGTCCGACGATCNNNNNNAGTCGTACTTTTTTTTTTTTTTTTTTTTTTTTV	AGTCGTAC	273
H10	RT1-274	CGATTGAGGCCGGTAATACGACTCACTATAGGGGTTCAGAGTTCTACAGTCCGACGATCNNNNNNACGGTTACTTTTTTTTTTTTTTTTTTTTTTTTV	ACGGTTAC	274
H11	RT1-275	CGATTGAGGCCGGTAATACGACTCACTATAGGGGTTCAGAGTTCTACAGTCCGACGATCNNNNNNATTGGCACTTTTTTTTTTTTTTTTTTTTTTTTV	ATTGGCAC	275
H12	RT1-276	CGATTGAGGCCGGTAATACGACTCACTATAGGGGTTCAGAGTTCTACAGTCCGACGATCNNNNNNCAGTCCAATTTTTTTTTTTTTTTTTTTTTTTTV	CAGTCCAA	276
H13	RT1-277	CGATTGAGGCCGGTAATACGACTCACTATAGGGGTTCAGAGTTCTACAGTCCGACGATCNNNNNNTCCTTCTCTTTTTTTTTTTTTTTTTTTTTTTTV	TCCTTCTC	277
H14	RT1-278	CGATTGAGGCCGGTAATACGACTCACTATAGGGGTTCAGAGTTCTACAGTCCGACGATCNNNNNNTAGTCAGCTTTTTTTTTTTTTTTTTTTTTTTTV	TAGTCAGC	278
H15	RT1-279	CGATTGAGGCCGGTAATACGACTCACTATAGGGGTTCAGAGTTCTACAGTCCGACGATCNNNNNNACGACATCTTTTTTTTTTTTTTTTTTTTTTTTV	ACGACATC	279
H16	RT1-280	CGATTGAGGCCGGTAATACGACTCACTATAGGGGTTCAGAGTTCTACAGTCCGACGATCNNNNNNGTTGTCAGTTTTTTTTTTTTTTTTTTTTTTTTV	GTTGTCAG	280
H17	RT1-281	CGATTGAGGCCGGTAATACGACTCACTATAGGGGTTCAGAGTTCTACAGTCCGACGATCNNNNNNCATGGTTGTTTTTTTTTTTTTTTTTTTTTTTTV	CATGGTTG	281
H18	RT1-282	CGATTGAGGCCGGTAATACGACTCACTATAGGGGTTCAGAGTTCTACAGTCCGACGATCNNNNNNGCGTTGTATTTTTTTTTTTTTTTTTTTTTTTTV	GCGTTGTA	282
H19	RT1-283	CGATTGAGGCCGGTAATACGACTCACTATAGGGGTTCAGAGTTCTACAGTCCGACGATCNNNNNNGGAGTCTTTTTTTTTTTTTTTTTTTTTTTTTTV	GGAGTCTT	283
H20	RT1-284	CGATTGAGGCCGGTAATACGACTCACTATAGGGGTTCAGAGTTCTACAGTCCGACGATCNNNNNNAACGCTGTTTTTTTTTTTTTTTTTTTTTTTTTV	AACGCTGT	284
H21	RT1-285	CGATTGAGGCCGGTAATACGACTCACTATAGGGGTTCAGAGTTCTACAGTCCGACGATCNNNNNNACGAACTCTTTTTTTTTTTTTTTTTTTTTTTTV	ACGAACTC	285
H22	RT1-286	CGATTGAGGCCGGTAATACGACTCACTATAGGGGTTCAGAGTTCTACAGTCCGACGATCNNNNNNCCTTCTTCTTTTTTTTTTTTTTTTTTTTTTTTV	CCTTCTTC	286
H23	RT1-287	CGATTGAGGCCGGTAATACGACTCACTATAGGGGTTCAGAGTTCTACAGTCCGACGATCNNNNNNCATACGTGTTTTTTTTTTTTTTTTTTTTTTTTV	CATACGTG	287
H24	RT1-288	CGATTGAGGCCGGTAATACGACTCACTATAGGGGTTCAGAGTTCTACAGTCCGACGATCNNNNNNACATTGGCTTTTTTTTTTTTTTTTTTTTTTTTV	ACATTGGC	288
I1	RT1-289	CGATTGAGGCCGGTAATACGACTCACTATAGGGGTTCAGAGTTCTACAGTCCGACGATCNNNNNNATTGGCGTTTTTTTTTTTTTTTTTTTTTTTTTV	ATTGGCGT	289
I2	RT1-290	CGATTGAGGCCGGTAATACGACTCACTATAGGGGTTCAGAGTTCTACAGTCCGACGATCNNNNNNCACAATCGTTTTTTTTTTTTTTTTTTTTTTTTV	CACAATCG	290
I3	RT1-291	CGATTGAGGCCGGTAATACGACTCACTATAGGGGTTCAGAGTTCTACAGTCCGACGATCNNNNNNCTAGACCATTTTTTTTTTTTTTTTTTTTTTTTV	CTAGACCA	291
I4	RT1-292	CGATTGAGGCCGGTAATACGACTCACTATAGGGGTTCAGAGTTCTACAGTCCGACGATCNNNNNNTACGGATCTTTTTTTTTTTTTTTTTTTTTTTTV	TACGGATC	292
I5	RT1-293	CGATTGAGGCCGGTAATACGACTCACTATAGGGGTTCAGAGTTCTACAGTCCGACGATCNNNNNNAGCAACTCTTTTTTTTTTTTTTTTTTTTTTTTV	AGCAACTC	293
I6	RT1-294	CGATTGAGGCCGGTAATACGACTCACTATAGGGGTTCAGAGTTCTACAGTCCGACGATCNNNNNNAAGTCGCTTTTTTTTTTTTTTTTTTTTTTTTTV	AAGTCGCT	294
I7	RT1-295	CGATTGAGGCCGGTAATACGACTCACTATAGGGGTTCAGAGTTCTACAGTCCGACGATCNNNNNNACAGCACTTTTTTTTTTTTTTTTTTTTTTTTTV	ACAGCACT	295
I8	RT1-296	CGATTGAGGCCGGTAATACGACTCACTATAGGGGTTCAGAGTTCTACAGTCCGACGATCNNNNNNATCTACGGTTTTTTTTTTTTTTTTTTTTTTTTV	ATCTACGG	296
I9	RT1-297	CGATTGAGGCCGGTAATACGACTCACTATAGGGGTTCAGAGTTCTACAGTCCGACGATCNNNNNNCTATAGGCTTTTTTTTTTTTTTTTTTTTTTTTV	CTATAGGC	297
I10	RT1-298	CGATTGAGGCCGGTAATACGACTCACTATAGGGGTTCAGAGTTCTACAGTCCGACGATCNNNNNNAAGCTCCATTTTTTTTTTTTTTTTTTTTTTTTV	AAGCTCCA	298
I11	RT1-299	CGATTGAGGCCGGTAATACGACTCACTATAGGGGTTCAGAGTTCTACAGTCCGACGATCNNNNNNCAATCCAGTTTTTTTTTTTTTTTTTTTTTTTTV	CAATCCAG	299
I12	RT1-300	CGATTGAGGCCGGTAATACGACTCACTATAGGGGTTCAGAGTTCTACAGTCCGACGATCNNNNNNATGCAGCTTTTTTTTTTTTTTTTTTTTTTTTTV	ATGCAGCT	300
I13	RT1-301	CGATTGAGGCCGGTAATACGACTCACTATAGGGGTTCAGAGTTCTACAGTCCGACGATCNNNNNNAACCGTACTTTTTTTTTTTTTTTTTTTTTTTTV	AACCGTAC	301
I14	RT1-302	CGATTGAGGCCGGTAATACGACTCACTATAGGGGTTCAGAGTTCTACAGTCCGACGATCNNNNNNCTCTCTCTTTTTTTTTTTTTTTTTTTTTTTTTV	CTCTCTCT	302
I15	RT1-303	CGATTGAGGCCGGTAATACGACTCACTATAGGGGTTCAGAGTTCTACAGTCCGACGATCNNNNNNAGCCTAACTTTTTTTTTTTTTTTTTTTTTTTTV	AGCCTAAC	303
I16	RT1-304	CGATTGAGGCCGGTAATACGACTCACTATAGGGGTTCAGAGTTCTACAGTCCGACGATCNNNNNNCTAAGCCATTTTTTTTTTTTTTTTTTTTTTTTV	CTAAGCCA	304
I17	RT1-305	CGATTGAGGCCGGTAATACGACTCACTATAGGGGTTCAGAGTTCTACAGTCCGACGATCNNNNNNAAGGAGGATTTTTTTTTTTTTTTTTTTTTTTTV	AAGGAGGA	305
I18	RT1-306	CGATTGAGGCCGGTAATACGACTCACTATAGGGGTTCAGAGTTCTACAGTCCGACGATCNNNNNNGCAAGCTTTTTTTTTTTTTTTTTTTTTTTTTTV	GCAAGCTT	306
I19	RT1-307	CGATTGAGGCCGGTAATACGACTCACTATAGGGGTTCAGAGTTCTACAGTCCGACGATCNNNNNNCACAGTACTTTTTTTTTTTTTTTTTTTTTTTTV	CACAGTAC	307
I20	RT1-308	CGATTGAGGCCGGTAATACGACTCACTATAGGGGTTCAGAGTTCTACAGTCCGACGATCNNNNNNATGCACCATTTTTTTTTTTTTTTTTTTTTTTTV	ATGCACCA	308
I21	RT1-309	CGATTGAGGCCGGTAATACGACTCACTATAGGGGTTCAGAGTTCTACAGTCCGACGATCNNNNNNGTGACACTTTTTTTTTTTTTTTTTTTTTTTTTV	GTGACACT	309
I22	RT1-310	CGATTGAGGCCGGTAATACGACTCACTATAGGGGTTCAGAGTTCTACAGTCCGACGATCNNNNNNATTGCTGGTTTTTTTTTTTTTTTTTTTTTTTTV	ATTGCTGG	310
I23	RT1-311	CGATTGAGGCCGGTAATACGACTCACTATAGGGGTTCAGAGTTCTACAGTCCGACGATCNNNNNNTCGACCAATTTTTTTTTTTTTTTTTTTTTTTTV	TCGACCAA	311
I24	RT1-312	CGATTGAGGCCGGTAATACGACTCACTATAGGGGTTCAGAGTTCTACAGTCCGACGATCNNNNNNCGTAACTGTTTTTTTTTTTTTTTTTTTTTTTTV	CGTAACTG	312
J1	RT1-313	CGATTGAGGCCGGTAATACGACTCACTATAGGGGTTCAGAGTTCTACAGTCCGACGATCNNNNNNCACTGCAATTTTTTTTTTTTTTTTTTTTTTTTV	CACTGCAA	313
J2	RT1-314	CGATTGAGGCCGGTAATACGACTCACTATAGGGGTTCAGAGTTCTACAGTCCGACGATCNNNNNNCAAGACTCTTTTTTTTTTTTTTTTTTTTTTTTV	CAAGACTC	314
J3	RT1-315	CGATTGAGGCCGGTAATACGACTCACTATAGGGGTTCAGAGTTCTACAGTCCGACGATCNNNNNNGTGCTCAATTTTTTTTTTTTTTTTTTTTTTTTV	GTGCTCAA	315
J4	RT1-316	CGATTGAGGCCGGTAATACGACTCACTATAGGGGTTCAGAGTTCTACAGTCCGACGATCNNNNNNGGTGCATTTTTTTTTTTTTTTTTTTTTTTTTTV	GGTGCATT	316
J5	RT1-317	CGATTGAGGCCGGTAATACGACTCACTATAGGGGTTCAGAGTTCTACAGTCCGACGATCNNNNNNGTGTGGTTTTTTTTTTTTTTTTTTTTTTTTTTV	GTGTGGTT	317
J6	RT1-318	CGATTGAGGCCGGTAATACGACTCACTATAGGGGTTCAGAGTTCTACAGTCCGACGATCNNNNNNGCCAACTATTTTTTTTTTTTTTTTTTTTTTTTV	GCCAACTA	318
J7	RT1-319	CGATTGAGGCCGGTAATACGACTCACTATAGGGGTTCAGAGTTCTACAGTCCGACGATCNNNNNNTACTGTGGTTTTTTTTTTTTTTTTTTTTTTTTV	TACTGTGG	319
J8	RT1-320	CGATTGAGGCCGGTAATACGACTCACTATAGGGGTTCAGAGTTCTACAGTCCGACGATCNNNNNNCTACGACATTTTTTTTTTTTTTTTTTTTTTTTV	CTACGACA	320
J9	RT1-321	CGATTGAGGCCGGTAATACGACTCACTATAGGGGTTCAGAGTTCTACAGTCCGACGATCNNNNNNTACCGAACTTTTTTTTTTTTTTTTTTTTTTTTV	TACCGAAC	321
J10	RT1-322	CGATTGAGGCCGGTAATACGACTCACTATAGGGGTTCAGAGTTCTACAGTCCGACGATCNNNNNNAGGCCATTTTTTTTTTTTTTTTTTTTTTTTTTV	AGGCCATT	322
J11	RT1-323	CGATTGAGGCCGGTAATACGACTCACTATAGGGGTTCAGAGTTCTACAGTCCGACGATCNNNNNNCGACCTAATTTTTTTTTTTTTTTTTTTTTTTTV	CGACCTAA	323
J12	RT1-324	CGATTGAGGCCGGTAATACGACTCACTATAGGGGTTCAGAGTTCTACAGTCCGACGATCNNNNNNCTGTGAGTTTTTTTTTTTTTTTTTTTTTTTTTV	CTGTGAGT	324
J13	RT1-325	CGATTGAGGCCGGTAATACGACTCACTATAGGGGTTCAGAGTTCTACAGTCCGACGATCNNNNNNCAGACGTTTTTTTTTTTTTTTTTTTTTTTTTTV	CAGACGTT	325
J14	RT1-326	CGATTGAGGCCGGTAATACGACTCACTATAGGGGTTCAGAGTTCTACAGTCCGACGATCNNNNNNCGAATCCATTTTTTTTTTTTTTTTTTTTTTTTV	CGAATCCA	326
J15	RT1-327	CGATTGAGGCCGGTAATACGACTCACTATAGGGGTTCAGAGTTCTACAGTCCGACGATCNNNNNNTCCATGAGTTTTTTTTTTTTTTTTTTTTTTTTV	TCCATGAG	327
J16	RT1-328	CGATTGAGGCCGGTAATACGACTCACTATAGGGGTTCAGAGTTCTACAGTCCGACGATCNNNNNNTCATGGTGTTTTTTTTTTTTTTTTTTTTTTTTV	TCATGGTG	328
J17	RT1-329	CGATTGAGGCCGGTAATACGACTCACTATAGGGGTTCAGAGTTCTACAGTCCGACGATCNNNNNNCTAACACGTTTTTTTTTTTTTTTTTTTTTTTTV	CTAACACG	329
J18	RT1-330	CGATTGAGGCCGGTAATACGACTCACTATAGGGGTTCAGAGTTCTACAGTCCGACGATCNNNNNNTCTTCCTCTTTTTTTTTTTTTTTTTTTTTTTTV	TCTTCCTC	330
J19	RT1-331	CGATTGAGGCCGGTAATACGACTCACTATAGGGGTTCAGAGTTCTACAGTCCGACGATCNNNNNNGCGTTAGTTTTTTTTTTTTTTTTTTTTTTTTTV	GCGTTAGT	331
J20	RT1-332	CGATTGAGGCCGGTAATACGACTCACTATAGGGGTTCAGAGTTCTACAGTCCGACGATCNNNNNNCTCCTCTTTTTTTTTTTTTTTTTTTTTTTTTTV	CTCCTCTT	332
J21	RT1-333	CGATTGAGGCCGGTAATACGACTCACTATAGGGGTTCAGAGTTCTACAGTCCGACGATCNNNNNNCGCATGATTTTTTTTTTTTTTTTTTTTTTTTTV	CGCATGAT	333
J22	RT1-334	CGATTGAGGCCGGTAATACGACTCACTATAGGGGTTCAGAGTTCTACAGTCCGACGATCNNNNNNGACCACTATTTTTTTTTTTTTTTTTTTTTTTTV	GACCACTA	334
J23	RT1-335	CGATTGAGGCCGGTAATACGACTCACTATAGGGGTTCAGAGTTCTACAGTCCGACGATCNNNNNNTATGGCTGTTTTTTTTTTTTTTTTTTTTTTTTV	TATGGCTG	335
J24	RT1-336	CGATTGAGGCCGGTAATACGACTCACTATAGGGGTTCAGAGTTCTACAGTCCGACGATCNNNNNNGCATGTACTTTTTTTTTTTTTTTTTTTTTTTTV	GCATGTAC	336
K1	RT1-337	CGATTGAGGCCGGTAATACGACTCACTATAGGGGTTCAGAGTTCTACAGTCCGACGATCNNNNNNTCTCCTCTTTTTTTTTTTTTTTTTTTTTTTTTV	TCTCCTCT	337
K2	RT1-338	CGATTGAGGCCGGTAATACGACTCACTATAGGGGTTCAGAGTTCTACAGTCCGACGATCNNNNNNACCAACGTTTTTTTTTTTTTTTTTTTTTTTTTV	ACCAACGT	338
K3	RT1-339	CGATTGAGGCCGGTAATACGACTCACTATAGGGGTTCAGAGTTCTACAGTCCGACGATCNNNNNNGTAGTGTCTTTTTTTTTTTTTTTTTTTTTTTTV	GTAGTGTC	339
K4	RT1-340	CGATTGAGGCCGGTAATACGACTCACTATAGGGGTTCAGAGTTCTACAGTCCGACGATCNNNNNNTCTCAAGGTTTTTTTTTTTTTTTTTTTTTTTTV	TCTCAAGG	340
K5	RT1-341	CGATTGAGGCCGGTAATACGACTCACTATAGGGGTTCAGAGTTCTACAGTCCGACGATCNNNNNNTATGGCCATTTTTTTTTTTTTTTTTTTTTTTTV	TATGGCCA	341
K6	RT1-342	CGATTGAGGCCGGTAATACGACTCACTATAGGGGTTCAGAGTTCTACAGTCCGACGATCNNNNNNTACACGTGTTTTTTTTTTTTTTTTTTTTTTTTV	TACACGTG	342
K7	RT1-343	CGATTGAGGCCGGTAATACGACTCACTATAGGGGTTCAGAGTTCTACAGTCCGACGATCNNNNNNACTTCAGGTTTTTTTTTTTTTTTTTTTTTTTTV	ACTTCAGG	343
K8	RT1-344	CGATTGAGGCCGGTAATACGACTCACTATAGGGGTTCAGAGTTCTACAGTCCGACGATCNNNNNNACCACTGATTTTTTTTTTTTTTTTTTTTTTTTV	ACCACTGA	344
K9	RT1-345	CGATTGAGGCCGGTAATACGACTCACTATAGGGGTTCAGAGTTCTACAGTCCGACGATCNNNNNNGCTCTGAATTTTTTTTTTTTTTTTTTTTTTTTV	GCTCTGAA	345
K10	RT1-346	CGATTGAGGCCGGTAATACGACTCACTATAGGGGTTCAGAGTTCTACAGTCCGACGATCNNNNNNCAAGTGTCTTTTTTTTTTTTTTTTTTTTTTTTV	CAAGTGTC	346
K11	RT1-347	CGATTGAGGCCGGTAATACGACTCACTATAGGGGTTCAGAGTTCTACAGTCCGACGATCNNNNNNTGCATGGTTTTTTTTTTTTTTTTTTTTTTTTTV	TGCATGGT	347
K12	RT1-348	CGATTGAGGCCGGTAATACGACTCACTATAGGGGTTCAGAGTTCTACAGTCCGACGATCNNNNNNGCAGTCATTTTTTTTTTTTTTTTTTTTTTTTTV	GCAGTCAT	348
K13	RT1-349	CGATTGAGGCCGGTAATACGACTCACTATAGGGGTTCAGAGTTCTACAGTCCGACGATCNNNNNNACTACGGTTTTTTTTTTTTTTTTTTTTTTTTTV	ACTACGGT	349
K14	RT1-350	CGATTGAGGCCGGTAATACGACTCACTATAGGGGTTCAGAGTTCTACAGTCCGACGATCNNNNNNAACTGTGCTTTTTTTTTTTTTTTTTTTTTTTTV	AACTGTGC	350
K15	RT1-351	CGATTGAGGCCGGTAATACGACTCACTATAGGGGTTCAGAGTTCTACAGTCCGACGATCNNNNNNACGCACTATTTTTTTTTTTTTTTTTTTTTTTTV	ACGCACTA	351
K16	RT1-352	CGATTGAGGCCGGTAATACGACTCACTATAGGGGTTCAGAGTTCTACAGTCCGACGATCNNNNNNAGTCATGCTTTTTTTTTTTTTTTTTTTTTTTTV	AGTCATGC	352
K17	RT1-353	CGATTGAGGCCGGTAATACGACTCACTATAGGGGTTCAGAGTTCTACAGTCCGACGATCNNNNNNTGTATGGCTTTTTTTTTTTTTTTTTTTTTTTTV	TGTATGGC	353
K18	RT1-354	CGATTGAGGCCGGTAATACGACTCACTATAGGGGTTCAGAGTTCTACAGTCCGACGATCNNNNNNGTGGTCTATTTTTTTTTTTTTTTTTTTTTTTTV	GTGGTCTA	354
K19	RT1-355	CGATTGAGGCCGGTAATACGACTCACTATAGGGGTTCAGAGTTCTACAGTCCGACGATCNNNNNNAGTATCCGTTTTTTTTTTTTTTTTTTTTTTTTV	AGTATCCG	355
K20	RT1-356	CGATTGAGGCCGGTAATACGACTCACTATAGGGGTTCAGAGTTCTACAGTCCGACGATCNNNNNNTATTGCGGTTTTTTTTTTTTTTTTTTTTTTTTV	TATTGCGG	356
K21	RT1-357	CGATTGAGGCCGGTAATACGACTCACTATAGGGGTTCAGAGTTCTACAGTCCGACGATCNNNNNNCGTAGCATTTTTTTTTTTTTTTTTTTTTTTTTV	CGTAGCAT	357
K22	RT1-358	CGATTGAGGCCGGTAATACGACTCACTATAGGGGTTCAGAGTTCTACAGTCCGACGATCNNNNNNACCAAGTCTTTTTTTTTTTTTTTTTTTTTTTTV	ACCAAGTC	358
K23	RT1-359	CGATTGAGGCCGGTAATACGACTCACTATAGGGGTTCAGAGTTCTACAGTCCGACGATCNNNNNNCGTGATGTTTTTTTTTTTTTTTTTTTTTTTTTV	CGTGATGT	359
K24	RT1-360	CGATTGAGGCCGGTAATACGACTCACTATAGGGGTTCAGAGTTCTACAGTCCGACGATCNNNNNNCCATCGAATTTTTTTTTTTTTTTTTTTTTTTTV	CCATCGAA	360
L1	RT1-361	CGATTGAGGCCGGTAATACGACTCACTATAGGGGTTCAGAGTTCTACAGTCCGACGATCNNNNNNCTAGGATCTTTTTTTTTTTTTTTTTTTTTTTTV	CTAGGATC	361
L2	RT1-362	CGATTGAGGCCGGTAATACGACTCACTATAGGGGTTCAGAGTTCTACAGTCCGACGATCNNNNNNACACGCATTTTTTTTTTTTTTTTTTTTTTTTTV	ACACGCAT	362
L3	RT1-363	CGATTGAGGCCGGTAATACGACTCACTATAGGGGTTCAGAGTTCTACAGTCCGACGATCNNNNNNTGCGGATTTTTTTTTTTTTTTTTTTTTTTTTTV	TGCGGATT	363
L4	RT1-364	CGATTGAGGCCGGTAATACGACTCACTATAGGGGTTCAGAGTTCTACAGTCCGACGATCNNNNNNCGACCATATTTTTTTTTTTTTTTTTTTTTTTTV	CGACCATA	364
L5	RT1-365	CGATTGAGGCCGGTAATACGACTCACTATAGGGGTTCAGAGTTCTACAGTCCGACGATCNNNNNNTCGCACAATTTTTTTTTTTTTTTTTTTTTTTTV	TCGCACAA	365
L6	RT1-366	CGATTGAGGCCGGTAATACGACTCACTATAGGGGTTCAGAGTTCTACAGTCCGACGATCNNNNNNAGCTGTTGTTTTTTTTTTTTTTTTTTTTTTTTV	AGCTGTTG	366
L7	RT1-367	CGATTGAGGCCGGTAATACGACTCACTATAGGGGTTCAGAGTTCTACAGTCCGACGATCNNNNNNGAACTTCGTTTTTTTTTTTTTTTTTTTTTTTTV	GAACTTCG	367
L8	RT1-368	CGATTGAGGCCGGTAATACGACTCACTATAGGGGTTCAGAGTTCTACAGTCCGACGATCNNNNNNTGGTGATCTTTTTTTTTTTTTTTTTTTTTTTTV	TGGTGATC	368
L9	RT1-369	CGATTGAGGCCGGTAATACGACTCACTATAGGGGTTCAGAGTTCTACAGTCCGACGATCNNNNNNCGATAGCTTTTTTTTTTTTTTTTTTTTTTTTTV	CGATAGCT	369
L10	RT1-370	CGATTGAGGCCGGTAATACGACTCACTATAGGGGTTCAGAGTTCTACAGTCCGACGATCNNNNNNATCCGCAATTTTTTTTTTTTTTTTTTTTTTTTV	ATCCGCAA	370
L11	RT1-371	CGATTGAGGCCGGTAATACGACTCACTATAGGGGTTCAGAGTTCTACAGTCCGACGATCNNNNNNCGCTAGTATTTTTTTTTTTTTTTTTTTTTTTTV	CGCTAGTA	371
L12	RT1-372	CGATTGAGGCCGGTAATACGACTCACTATAGGGGTTCAGAGTTCTACAGTCCGACGATCNNNNNNCGCAACATTTTTTTTTTTTTTTTTTTTTTTTTV	CGCAACAT	372
L13	RT1-373	CGATTGAGGCCGGTAATACGACTCACTATAGGGGTTCAGAGTTCTACAGTCCGACGATCNNNNNNGACCTACATTTTTTTTTTTTTTTTTTTTTTTTV	GACCTACA	373
L14	RT1-374	CGATTGAGGCCGGTAATACGACTCACTATAGGGGTTCAGAGTTCTACAGTCCGACGATCNNNNNNAGGAAGGATTTTTTTTTTTTTTTTTTTTTTTTV	AGGAAGGA	374
L15	RT1-375	CGATTGAGGCCGGTAATACGACTCACTATAGGGGTTCAGAGTTCTACAGTCCGACGATCNNNNNNCAACATGCTTTTTTTTTTTTTTTTTTTTTTTTV	CAACATGC	375
L16	RT1-376	CGATTGAGGCCGGTAATACGACTCACTATAGGGGTTCAGAGTTCTACAGTCCGACGATCNNNNNNCCAATAGCTTTTTTTTTTTTTTTTTTTTTTTTV	CCAATAGC	376
L17	RT1-377	CGATTGAGGCCGGTAATACGACTCACTATAGGGGTTCAGAGTTCTACAGTCCGACGATCNNNNNNTCGAGTTGTTTTTTTTTTTTTTTTTTTTTTTTV	TCGAGTTG	377
L18	RT1-378	CGATTGAGGCCGGTAATACGACTCACTATAGGGGTTCAGAGTTCTACAGTCCGACGATCNNNNNNGCGCAATTTTTTTTTTTTTTTTTTTTTTTTTTV	GCGCAATT	378
L19	RT1-379	CGATTGAGGCCGGTAATACGACTCACTATAGGGGTTCAGAGTTCTACAGTCCGACGATCNNNNNNACCATGTGTTTTTTTTTTTTTTTTTTTTTTTTV	ACCATGTG	379
L20	RT1-380	CGATTGAGGCCGGTAATACGACTCACTATAGGGGTTCAGAGTTCTACAGTCCGACGATCNNNNNNCACACTAGTTTTTTTTTTTTTTTTTTTTTTTTV	CACACTAG	380
L21	RT1-381	CGATTGAGGCCGGTAATACGACTCACTATAGGGGTTCAGAGTTCTACAGTCCGACGATCNNNNNNTGCAATGCTTTTTTTTTTTTTTTTTTTTTTTTV	TGCAATGC	381
L22	RT1-382	CGATTGAGGCCGGTAATACGACTCACTATAGGGGTTCAGAGTTCTACAGTCCGACGATCNNNNNNGCAATGTCTTTTTTTTTTTTTTTTTTTTTTTTV	GCAATGTC	382
L23	RT1-383	CGATTGAGGCCGGTAATACGACTCACTATAGGGGTTCAGAGTTCTACAGTCCGACGATCNNNNNNTGGTCTGATTTTTTTTTTTTTTTTTTTTTTTTV	TGGTCTGA	383
L24	RT1-384	CGATTGAGGCCGGTAATACGACTCACTATAGGGGTTCAGAGTTCTACAGTCCGACGATCNNNNNNGTCATGTGTTTTTTTTTTTTTTTTTTTTTTTTV	GTCATGTG	384
M1	RT1-385	CGATTGAGGCCGGTAATACGACTCACTATAGGGGTTCAGAGTTCTACAGTCCGACGATCNNNNNNGTCATGCATTTTTTTTTTTTTTTTTTTTTTTTV	GTCATGCA	385
M2	RT1-386	CGATTGAGGCCGGTAATACGACTCACTATAGGGGTTCAGAGTTCTACAGTCCGACGATCNNNNNNGGTACACTTTTTTTTTTTTTTTTTTTTTTTTTV	GGTACACT	386
M3	RT1-387	CGATTGAGGCCGGTAATACGACTCACTATAGGGGTTCAGAGTTCTACAGTCCGACGATCNNNNNNTCAAGCACTTTTTTTTTTTTTTTTTTTTTTTTV	TCAAGCAC	387
M4	RT1-388	CGATTGAGGCCGGTAATACGACTCACTATAGGGGTTCAGAGTTCTACAGTCCGACGATCNNNNNNGCAAGTTCTTTTTTTTTTTTTTTTTTTTTTTTV	GCAAGTTC	388
M5	RT1-389	CGATTGAGGCCGGTAATACGACTCACTATAGGGGTTCAGAGTTCTACAGTCCGACGATCNNNNNNGGTATCGTTTTTTTTTTTTTTTTTTTTTTTTTV	GGTATCGT	389
M6	RT1-390	CGATTGAGGCCGGTAATACGACTCACTATAGGGGTTCAGAGTTCTACAGTCCGACGATCNNNNNNATGTCCAGTTTTTTTTTTTTTTTTTTTTTTTTV	ATGTCCAG	390
M7	RT1-391	CGATTGAGGCCGGTAATACGACTCACTATAGGGGTTCAGAGTTCTACAGTCCGACGATCNNNNNNACTCTGAGTTTTTTTTTTTTTTTTTTTTTTTTV	ACTCTGAG	391
M8	RT1-392	CGATTGAGGCCGGTAATACGACTCACTATAGGGGTTCAGAGTTCTACAGTCCGACGATCNNNNNNGGCCAATTTTTTTTTTTTTTTTTTTTTTTTTTV	GGCCAATT	392
M9	RT1-393	CGATTGAGGCCGGTAATACGACTCACTATAGGGGTTCAGAGTTCTACAGTCCGACGATCNNNNNNCATTGTGGTTTTTTTTTTTTTTTTTTTTTTTTV	CATTGTGG	393
M10	RT1-394	CGATTGAGGCCGGTAATACGACTCACTATAGGGGTTCAGAGTTCTACAGTCCGACGATCNNNNNNGATTGGTCTTTTTTTTTTTTTTTTTTTTTTTTV	GATTGGTC	394
M11	RT1-395	CGATTGAGGCCGGTAATACGACTCACTATAGGGGTTCAGAGTTCTACAGTCCGACGATCNNNNNNTCAGGCATTTTTTTTTTTTTTTTTTTTTTTTTV	TCAGGCAT	395
M12	RT1-396	CGATTGAGGCCGGTAATACGACTCACTATAGGGGTTCAGAGTTCTACAGTCCGACGATCNNNNNNTGCGGTTATTTTTTTTTTTTTTTTTTTTTTTTV	TGCGGTTA	396
M13	RT1-397	CGATTGAGGCCGGTAATACGACTCACTATAGGGGTTCAGAGTTCTACAGTCCGACGATCNNNNNNGACATGCTTTTTTTTTTTTTTTTTTTTTTTTTV	GACATGCT	397
M14	RT1-398	CGATTGAGGCCGGTAATACGACTCACTATAGGGGTTCAGAGTTCTACAGTCCGACGATCNNNNNNTAAGCTGCTTTTTTTTTTTTTTTTTTTTTTTTV	TAAGCTGC	398
M15	RT1-399	CGATTGAGGCCGGTAATACGACTCACTATAGGGGTTCAGAGTTCTACAGTCCGACGATCNNNNNNAGCGTATCTTTTTTTTTTTTTTTTTTTTTTTTV	AGCGTATC	399
M16	RT1-400	CGATTGAGGCCGGTAATACGACTCACTATAGGGGTTCAGAGTTCTACAGTCCGACGATCNNNNNNATTGCCGATTTTTTTTTTTTTTTTTTTTTTTTV	ATTGCCGA	400
M17	RT1-401	CGATTGAGGCCGGTAATACGACTCACTATAGGGGTTCAGAGTTCTACAGTCCGACGATCNNNNNNTAGGTTGCTTTTTTTTTTTTTTTTTTTTTTTTV	TAGGTTGC	401
M18	RT1-402	CGATTGAGGCCGGTAATACGACTCACTATAGGGGTTCAGAGTTCTACAGTCCGACGATCNNNNNNTGGCAACTTTTTTTTTTTTTTTTTTTTTTTTTV	TGGCAACT	402
M19	RT1-403	CGATTGAGGCCGGTAATACGACTCACTATAGGGGTTCAGAGTTCTACAGTCCGACGATCNNNNNNGCATCTAGTTTTTTTTTTTTTTTTTTTTTTTTV	GCATCTAG	403
M20	RT1-404	CGATTGAGGCCGGTAATACGACTCACTATAGGGGTTCAGAGTTCTACAGTCCGACGATCNNNNNNGCCAATTGTTTTTTTTTTTTTTTTTTTTTTTTV	GCCAATTG	404
M21	RT1-405	CGATTGAGGCCGGTAATACGACTCACTATAGGGGTTCAGAGTTCTACAGTCCGACGATCNNNNNNTGCCAGATTTTTTTTTTTTTTTTTTTTTTTTTV	TGCCAGAT	405
M22	RT1-406	CGATTGAGGCCGGTAATACGACTCACTATAGGGGTTCAGAGTTCTACAGTCCGACGATCNNNNNNTAGCGTCATTTTTTTTTTTTTTTTTTTTTTTTV	TAGCGTCA	406
M23	RT1-407	CGATTGAGGCCGGTAATACGACTCACTATAGGGGTTCAGAGTTCTACAGTCCGACGATCNNNNNNACCAAGCTTTTTTTTTTTTTTTTTTTTTTTTTV	ACCAAGCT	407
M24	RT1-408	CGATTGAGGCCGGTAATACGACTCACTATAGGGGTTCAGAGTTCTACAGTCCGACGATCNNNNNNAGCATGTCTTTTTTTTTTTTTTTTTTTTTTTTV	AGCATGTC	408
N1	RT1-409	CGATTGAGGCCGGTAATACGACTCACTATAGGGGTTCAGAGTTCTACAGTCCGACGATCNNNNNNGCGCTTAATTTTTTTTTTTTTTTTTTTTTTTTV	GCGCTTAA	409
N2	RT1-410	CGATTGAGGCCGGTAATACGACTCACTATAGGGGTTCAGAGTTCTACAGTCCGACGATCNNNNNNGTTACCGATTTTTTTTTTTTTTTTTTTTTTTTV	GTTACCGA	410
N3	RT1-411	CGATTGAGGCCGGTAATACGACTCACTATAGGGGTTCAGAGTTCTACAGTCCGACGATCNNNNNNGGACTTGTTTTTTTTTTTTTTTTTTTTTTTTTV	GGACTTGT	411
N4	RT1-412	CGATTGAGGCCGGTAATACGACTCACTATAGGGGTTCAGAGTTCTACAGTCCGACGATCNNNNNNTGACCATGTTTTTTTTTTTTTTTTTTTTTTTTV	TGACCATG	412
N5	RT1-413	CGATTGAGGCCGGTAATACGACTCACTATAGGGGTTCAGAGTTCTACAGTCCGACGATCNNNNNNACCGTGATTTTTTTTTTTTTTTTTTTTTTTTTV	ACCGTGAT	413
N6	RT1-414	CGATTGAGGCCGGTAATACGACTCACTATAGGGGTTCAGAGTTCTACAGTCCGACGATCNNNNNNATGCAGTCTTTTTTTTTTTTTTTTTTTTTTTTV	ATGCAGTC	414
N7	RT1-415	CGATTGAGGCCGGTAATACGACTCACTATAGGGGTTCAGAGTTCTACAGTCCGACGATCNNNNNNCGTAGTGTTTTTTTTTTTTTTTTTTTTTTTTTV	CGTAGTGT	415
N8	RT1-416	CGATTGAGGCCGGTAATACGACTCACTATAGGGGTTCAGAGTTCTACAGTCCGACGATCNNNNNNAGGTTCACTTTTTTTTTTTTTTTTTTTTTTTTV	AGGTTCAC	416
N9	RT1-417	CGATTGAGGCCGGTAATACGACTCACTATAGGGGTTCAGAGTTCTACAGTCCGACGATCNNNNNNTGGTTGCATTTTTTTTTTTTTTTTTTTTTTTTV	TGGTTGCA	417
N10	RT1-418	CGATTGAGGCCGGTAATACGACTCACTATAGGGGTTCAGAGTTCTACAGTCCGACGATCNNNNNNTAGCCGATTTTTTTTTTTTTTTTTTTTTTTTTV	TAGCCGAT	418
N11	RT1-419	CGATTGAGGCCGGTAATACGACTCACTATAGGGGTTCAGAGTTCTACAGTCCGACGATCNNNNNNCAGTACCATTTTTTTTTTTTTTTTTTTTTTTTV	CAGTACCA	419
N12	RT1-420	CGATTGAGGCCGGTAATACGACTCACTATAGGGGTTCAGAGTTCTACAGTCCGACGATCNNNNNNCAATTGGCTTTTTTTTTTTTTTTTTTTTTTTTV	CAATTGGC	420
N13	RT1-421	CGATTGAGGCCGGTAATACGACTCACTATAGGGGTTCAGAGTTCTACAGTCCGACGATCNNNNNNTGCTAGGTTTTTTTTTTTTTTTTTTTTTTTTTV	TGCTAGGT	421
N14	RT1-422	CGATTGAGGCCGGTAATACGACTCACTATAGGGGTTCAGAGTTCTACAGTCCGACGATCNNNNNNAACGTCACTTTTTTTTTTTTTTTTTTTTTTTTV	AACGTCAC	422
N15	RT1-423	CGATTGAGGCCGGTAATACGACTCACTATAGGGGTTCAGAGTTCTACAGTCCGACGATCNNNNNNCCGATGTATTTTTTTTTTTTTTTTTTTTTTTTV	CCGATGTA	423
N16	RT1-424	CGATTGAGGCCGGTAATACGACTCACTATAGGGGTTCAGAGTTCTACAGTCCGACGATCNNNNNNGGTTAGCTTTTTTTTTTTTTTTTTTTTTTTTTV	GGTTAGCT	424
N17	RT1-425	CGATTGAGGCCGGTAATACGACTCACTATAGGGGTTCAGAGTTCTACAGTCCGACGATCNNNNNNGTCAGTACTTTTTTTTTTTTTTTTTTTTTTTTV	GTCAGTAC	425
N18	RT1-426	CGATTGAGGCCGGTAATACGACTCACTATAGGGGTTCAGAGTTCTACAGTCCGACGATCNNNNNNCAATCGGTTTTTTTTTTTTTTTTTTTTTTTTTV	CAATCGGT	426
N19	RT1-427	CGATTGAGGCCGGTAATACGACTCACTATAGGGGTTCAGAGTTCTACAGTCCGACGATCNNNNNNGCGTGTATTTTTTTTTTTTTTTTTTTTTTTTTV	GCGTGTAT	427
N20	RT1-428	CGATTGAGGCCGGTAATACGACTCACTATAGGGGTTCAGAGTTCTACAGTCCGACGATCNNNNNNGCATGTGTTTTTTTTTTTTTTTTTTTTTTTTTV	GCATGTGT	428
N21	RT1-429	CGATTGAGGCCGGTAATACGACTCACTATAGGGGTTCAGAGTTCTACAGTCCGACGATCNNNNNNGTTGAGTCTTTTTTTTTTTTTTTTTTTTTTTTV	GTTGAGTC	429
N22	RT1-430	CGATTGAGGCCGGTAATACGACTCACTATAGGGGTTCAGAGTTCTACAGTCCGACGATCNNNNNNCACTACAGTTTTTTTTTTTTTTTTTTTTTTTTV	CACTACAG	430
N23	RT1-431	CGATTGAGGCCGGTAATACGACTCACTATAGGGGTTCAGAGTTCTACAGTCCGACGATCNNNNNNGTATGGTCTTTTTTTTTTTTTTTTTTTTTTTTV	GTATGGTC	431
N24	RT1-432	CGATTGAGGCCGGTAATACGACTCACTATAGGGGTTCAGAGTTCTACAGTCCGACGATCNNNNNNTCGCTGAATTTTTTTTTTTTTTTTTTTTTTTTV	TCGCTGAA	432
O1	RT1-433	CGATTGAGGCCGGTAATACGACTCACTATAGGGGTTCAGAGTTCTACAGTCCGACGATCNNNNNNCTCAAGACTTTTTTTTTTTTTTTTTTTTTTTTV	CTCAAGAC	433
O2	RT1-434	CGATTGAGGCCGGTAATACGACTCACTATAGGGGTTCAGAGTTCTACAGTCCGACGATCNNNNNNGCCATGATTTTTTTTTTTTTTTTTTTTTTTTTV	GCCATGAT	434
O3	RT1-435	CGATTGAGGCCGGTAATACGACTCACTATAGGGGTTCAGAGTTCTACAGTCCGACGATCNNNNNNATTGTGGCTTTTTTTTTTTTTTTTTTTTTTTTV	ATTGTGGC	435
O4	RT1-436	CGATTGAGGCCGGTAATACGACTCACTATAGGGGTTCAGAGTTCTACAGTCCGACGATCNNNNNNAGCACTTGTTTTTTTTTTTTTTTTTTTTTTTTV	AGCACTTG	436
O5	RT1-437	CGATTGAGGCCGGTAATACGACTCACTATAGGGGTTCAGAGTTCTACAGTCCGACGATCNNNNNNTCACACGATTTTTTTTTTTTTTTTTTTTTTTTV	TCACACGA	437
O6	RT1-438	CGATTGAGGCCGGTAATACGACTCACTATAGGGGTTCAGAGTTCTACAGTCCGACGATCNNNNNNCCACTAAGTTTTTTTTTTTTTTTTTTTTTTTTV	CCACTAAG	438
O7	RT1-439	CGATTGAGGCCGGTAATACGACTCACTATAGGGGTTCAGAGTTCTACAGTCCGACGATCNNNNNNTACCGTGATTTTTTTTTTTTTTTTTTTTTTTTV	TACCGTGA	439
O8	RT1-440	CGATTGAGGCCGGTAATACGACTCACTATAGGGGTTCAGAGTTCTACAGTCCGACGATCNNNNNNGCCATCAATTTTTTTTTTTTTTTTTTTTTTTTV	GCCATCAA	440
O9	RT1-441	CGATTGAGGCCGGTAATACGACTCACTATAGGGGTTCAGAGTTCTACAGTCCGACGATCNNNNNNGGCTATCATTTTTTTTTTTTTTTTTTTTTTTTV	GGCTATCA	441
O10	RT1-442	CGATTGAGGCCGGTAATACGACTCACTATAGGGGTTCAGAGTTCTACAGTCCGACGATCNNNNNNGGTCCAATTTTTTTTTTTTTTTTTTTTTTTTTV	GGTCCAAT	442
O11	RT1-443	CGATTGAGGCCGGTAATACGACTCACTATAGGGGTTCAGAGTTCTACAGTCCGACGATCNNNNNNGTGAGTTCTTTTTTTTTTTTTTTTTTTTTTTTV	GTGAGTTC	443
O12	RT1-444	CGATTGAGGCCGGTAATACGACTCACTATAGGGGTTCAGAGTTCTACAGTCCGACGATCNNNNNNATGGTCCATTTTTTTTTTTTTTTTTTTTTTTTV	ATGGTCCA	444
O13	RT1-445	CGATTGAGGCCGGTAATACGACTCACTATAGGGGTTCAGAGTTCTACAGTCCGACGATCNNNNNNGGAAGAAGTTTTTTTTTTTTTTTTTTTTTTTTV	GGAAGAAG	445
O14	RT1-446	CGATTGAGGCCGGTAATACGACTCACTATAGGGGTTCAGAGTTCTACAGTCCGACGATCNNNNNNGAGACCTTTTTTTTTTTTTTTTTTTTTTTTTTV	GAGACCTT	446
O15	RT1-447	CGATTGAGGCCGGTAATACGACTCACTATAGGGGTTCAGAGTTCTACAGTCCGACGATCNNNNNNAGCTCATGTTTTTTTTTTTTTTTTTTTTTTTTV	AGCTCATG	447
O16	RT1-448	CGATTGAGGCCGGTAATACGACTCACTATAGGGGTTCAGAGTTCTACAGTCCGACGATCNNNNNNCTCACAGATTTTTTTTTTTTTTTTTTTTTTTTV	CTCACAGA	448
O17	RT1-449	CGATTGAGGCCGGTAATACGACTCACTATAGGGGTTCAGAGTTCTACAGTCCGACGATCNNNNNNGAATCCACTTTTTTTTTTTTTTTTTTTTTTTTV	GAATCCAC	449
O18	RT1-450	CGATTGAGGCCGGTAATACGACTCACTATAGGGGTTCAGAGTTCTACAGTCCGACGATCNNNNNNCGTCGATATTTTTTTTTTTTTTTTTTTTTTTTV	CGTCGATA	450
O19	RT1-451	CGATTGAGGCCGGTAATACGACTCACTATAGGGGTTCAGAGTTCTACAGTCCGACGATCNNNNNNTCCAGTGATTTTTTTTTTTTTTTTTTTTTTTTV	TCCAGTGA	451
O20	RT1-452	CGATTGAGGCCGGTAATACGACTCACTATAGGGGTTCAGAGTTCTACAGTCCGACGATCNNNNNNCGCAATACTTTTTTTTTTTTTTTTTTTTTTTTV	CGCAATAC	452
O21	RT1-453	CGATTGAGGCCGGTAATACGACTCACTATAGGGGTTCAGAGTTCTACAGTCCGACGATCNNNNNNAGTGTCTGTTTTTTTTTTTTTTTTTTTTTTTTV	AGTGTCTG	453
O22	RT1-454	CGATTGAGGCCGGTAATACGACTCACTATAGGGGTTCAGAGTTCTACAGTCCGACGATCNNNNNNCAACTAGCTTTTTTTTTTTTTTTTTTTTTTTTV	CAACTAGC	454
O23	RT1-455	CGATTGAGGCCGGTAATACGACTCACTATAGGGGTTCAGAGTTCTACAGTCCGACGATCNNNNNNATACCACGTTTTTTTTTTTTTTTTTTTTTTTTV	ATACCACG	455
O24	RT1-456	CGATTGAGGCCGGTAATACGACTCACTATAGGGGTTCAGAGTTCTACAGTCCGACGATCNNNNNNTAGGCTGTTTTTTTTTTTTTTTTTTTTTTTTTV	TAGGCTGT	456
P1	RT1-457	CGATTGAGGCCGGTAATACGACTCACTATAGGGGTTCAGAGTTCTACAGTCCGACGATCNNNNNNATGAGCTCTTTTTTTTTTTTTTTTTTTTTTTTV	ATGAGCTC	457
P2	RT1-458	CGATTGAGGCCGGTAATACGACTCACTATAGGGGTTCAGAGTTCTACAGTCCGACGATCNNNNNNTACGTGCATTTTTTTTTTTTTTTTTTTTTTTTV	TACGTGCA	458
P3	RT1-459	CGATTGAGGCCGGTAATACGACTCACTATAGGGGTTCAGAGTTCTACAGTCCGACGATCNNNNNNACGCCATATTTTTTTTTTTTTTTTTTTTTTTTV	ACGCCATA	459
P4	RT1-460	CGATTGAGGCCGGTAATACGACTCACTATAGGGGTTCAGAGTTCTACAGTCCGACGATCNNNNNNTACAGCGTTTTTTTTTTTTTTTTTTTTTTTTTV	TACAGCGT	460
P5	RT1-461	CGATTGAGGCCGGTAATACGACTCACTATAGGGGTTCAGAGTTCTACAGTCCGACGATCNNNNNNGGTGATTCTTTTTTTTTTTTTTTTTTTTTTTTV	GGTGATTC	461
P6	RT1-462	CGATTGAGGCCGGTAATACGACTCACTATAGGGGTTCAGAGTTCTACAGTCCGACGATCNNNNNNTAGGCCATTTTTTTTTTTTTTTTTTTTTTTTTV	TAGGCCAT	462
P7	RT1-463	CGATTGAGGCCGGTAATACGACTCACTATAGGGGTTCAGAGTTCTACAGTCCGACGATCNNNNNNTGCAGACTTTTTTTTTTTTTTTTTTTTTTTTTV	TGCAGACT	463
P8	RT1-464	CGATTGAGGCCGGTAATACGACTCACTATAGGGGTTCAGAGTTCTACAGTCCGACGATCNNNNNNGAGAGAAGTTTTTTTTTTTTTTTTTTTTTTTTV	GAGAGAAG	464
P9	RT1-465	CGATTGAGGCCGGTAATACGACTCACTATAGGGGTTCAGAGTTCTACAGTCCGACGATCNNNNNNCTACGAACTTTTTTTTTTTTTTTTTTTTTTTTV	CTACGAAC	465
P10	RT1-466	CGATTGAGGCCGGTAATACGACTCACTATAGGGGTTCAGAGTTCTACAGTCCGACGATCNNNNNNAACACCACTTTTTTTTTTTTTTTTTTTTTTTTV	AACACCAC	466
P11	RT1-467	CGATTGAGGCCGGTAATACGACTCACTATAGGGGTTCAGAGTTCTACAGTCCGACGATCNNNNNNACGTATCGTTTTTTTTTTTTTTTTTTTTTTTTV	ACGTATCG	467
P12	RT1-468	CGATTGAGGCCGGTAATACGACTCACTATAGGGGTTCAGAGTTCTACAGTCCGACGATCNNNNNNACACTCGATTTTTTTTTTTTTTTTTTTTTTTTV	ACACTCGA	468
P13	RT1-469	CGATTGAGGCCGGTAATACGACTCACTATAGGGGTTCAGAGTTCTACAGTCCGACGATCNNNNNNGTACATCGTTTTTTTTTTTTTTTTTTTTTTTTV	GTACATCG	469
P14	RT1-470	CGATTGAGGCCGGTAATACGACTCACTATAGGGGTTCAGAGTTCTACAGTCCGACGATCNNNNNNGCTTGATGTTTTTTTTTTTTTTTTTTTTTTTTV	GCTTGATG	470
P15	RT1-471	CGATTGAGGCCGGTAATACGACTCACTATAGGGGTTCAGAGTTCTACAGTCCGACGATCNNNNNNTCGAGACTTTTTTTTTTTTTTTTTTTTTTTTTV	TCGAGACT	471
P16	RT1-472	CGATTGAGGCCGGTAATACGACTCACTATAGGGGTTCAGAGTTCTACAGTCCGACGATCNNNNNNCTGGTATGTTTTTTTTTTTTTTTTTTTTTTTTV	CTGGTATG	472
P17	RT1-473	CGATTGAGGCCGGTAATACGACTCACTATAGGGGTTCAGAGTTCTACAGTCCGACGATCNNNNNNGTCACGTATTTTTTTTTTTTTTTTTTTTTTTTV	GTCACGTA	473
P18	RT1-474	CGATTGAGGCCGGTAATACGACTCACTATAGGGGTTCAGAGTTCTACAGTCCGACGATCNNNNNNACGTGTGTTTTTTTTTTTTTTTTTTTTTTTTTV	ACGTGTGT	474
P19	RT1-475	CGATTGAGGCCGGTAATACGACTCACTATAGGGGTTCAGAGTTCTACAGTCCGACGATCNNNNNNTCAGCGTATTTTTTTTTTTTTTTTTTTTTTTTV	TCAGCGTA	475
P20	RT1-476	CGATTGAGGCCGGTAATACGACTCACTATAGGGGTTCAGAGTTCTACAGTCCGACGATCNNNNNNAGAAGAGGTTTTTTTTTTTTTTTTTTTTTTTTV	AGAAGAGG	476
P21	RT1-477	CGATTGAGGCCGGTAATACGACTCACTATAGGGGTTCAGAGTTCTACAGTCCGACGATCNNNNNNTATCCGGATTTTTTTTTTTTTTTTTTTTTTTTV	TATCCGGA	477
P22	RT1-478	CGATTGAGGCCGGTAATACGACTCACTATAGGGGTTCAGAGTTCTACAGTCCGACGATCNNNNNNACGACTCATTTTTTTTTTTTTTTTTTTTTTTTV	ACGACTCA	478
P23	RT1-479	CGATTGAGGCCGGTAATACGACTCACTATAGGGGTTCAGAGTTCTACAGTCCGACGATCNNNNNNAGTTCTGGTTTTTTTTTTTTTTTTTTTTTTTTV	AGTTCTGG	479
P24	RT1-480	CGATTGAGGCCGGTAATACGACTCACTATAGGGGTTCAGAGTTCTACAGTCCGACGATCNNNNNNCGAACTCATTTTTTTTTTTTTTTTTTTTTTTTV	CGAACTCA	480

## Sheet: C-RT1 plate format
Well in 384	A1	A2	A3	A4	A5	A6	A7	A8	A9	A10	A11	A12	A13	A14	A15	A16	A17	A18	A19	A20	A21	A22	A23	A24
Primer name	RT1-97	RT1-98	RT1-99	RT1-100	RT1-101	RT1-102	RT1-103	RT1-104	RT1-105	RT1-106	RT1-107	RT1-108	RT1-109	RT1-110	RT1-111	RT1-112	RT1-113	RT1-114	RT1-115	RT1-116	RT1-117	RT1-118	RT1-119	RT1-120
index sequence (as in primer)	GTAGCTCA	TAGACCAC	GGTCTATG	GTCCGAAT	TAGTGCGT	GACTGTAC	TCCAGTAG	AGCGTTGT	GATGCGTT	CCGTTAAG	CAAGCCAT	CTCCAAGA	CTGCGTAA	GTCCAACA	ACTTGTGG	AGCTCTGA	GCATTAGC	CCTATGAG	CAACGCTA	GCATAGTC	TAGGTCAC	ACTCAAGC	TCACCGAA	TCATGGAC
	B1	B2	B3	B4	B5	B6	B7	B8	B9	B10	B11	B12	B13	B14	B15	B16	B17	B18	B19	B20	B21	B22	B23	B24
	RT1-121	RT1-122	RT1-123	RT1-124	RT1-125	RT1-126	RT1-127	RT1-128	RT1-129	RT1-130	RT1-131	RT1-132	RT1-133	RT1-134	RT1-135	RT1-136	RT1-137	RT1-138	RT1-139	RT1-140	RT1-141	RT1-142	RT1-143	RT1-144
	GACTACTG	AGTCTTGG	AGCAGCTT	TCACAGAC	CCTGTAAG	ATGACTGC	CTCTCCTT	CGTGTCAA	GCCTTAAG	GCACGTAT	CAACGTAC	GCGTACAT	TATCCAGG	CCGATATG	GTGTTAGC	GTGGTTGT	GTTGCTGA	CCTGGATA	ACCGACAT	ATGCTGAC	TACTGGCA	CAGTCATG	GTGATTCG	CGCATGTA
c	C1	C2	C3	C4	C5	C6	C7	C8	C9	C10	C11	C12	C13	C14	C15	C16	C17	C18	C19	C20	C21	C22	C23	C24
	RT1-145	RT1-146	RT1-147	RT1-148	RT1-149	RT1-150	RT1-151	RT1-152	RT1-153	RT1-154	RT1-155	RT1-156	RT1-157	RT1-158	RT1-159	RT1-160	RT1-161	RT1-162	RT1-163	RT1-164	RT1-165	RT1-166	RT1-167	RT1-168
	AGTGTGCT	TGTCGCAA	GGACTTAC	CTATCGGA	ACGCGTTA	TACGCTGA	ACTACACG	ATCACGAC	CATCAAGC	ACTGTTGG	TCAGTGCA	GCGATATC	TGCGTAGT	GCTAGTGT	CTCACGAA	AGTCACGT	CACGGTAT	GGCACTTA	TGCACGTA	GGTTATGC	TGACTCAG	GACCATCA	TCCTCTTC	ACTGTGAC
d	D1	D2	D3	D4	D5	D6	D7	D8	D9	D10	D11	D12	D13	D14	D15	D16	D17	D18	D19	D20	D21	D22	D23	D24
	RT1-169	RT1-170	RT1-171	RT1-172	RT1-173	RT1-174	RT1-175	RT1-176	RT1-177	RT1-178	RT1-179	RT1-180	RT1-181	RT1-182	RT1-183	RT1-184	RT1-185	RT1-186	RT1-187	RT1-188	RT1-189	RT1-190	RT1-191	RT1-192
	ACAACGTC	CCATCAAG	ATTGCGTG	CTACGCAA	GCTAAGCT	ATGCCAGT	CATCCAGA	GACTACCA	CAGTGCTA	CGTGAATC	GGTAACTC	CACTAGCA	GATACTGC	GTGCGTTA	GGATGCTT	TCAGGTGT	TAGCTCAG	TAGCGATC	CCTAGTAG	CAGCTTAG	AGGTTCCA	TGGCGATT	ACCAATCG	GAAGGAAG
e	E1	E2	E3	E4	E5	E6	E7	E8	E9	E10	E11	E12	E13	E14	E15	E16	E17	E18	E19	E20	E21	E22	E23	E24
	RT1-193	RT1-194	RT1-195	RT1-196	RT1-197	RT1-198	RT1-199	RT1-200	RT1-201	RT1-202	RT1-203	RT1-204	RT1-205	RT1-206	RT1-207	RT1-208	RT1-209	RT1-210	RT1-211	RT1-212	RT1-213	RT1-214	RT1-215	RT1-216
	TGGTCGAT	TGCGACTA	TGACTACG	GGCATGTT	ACGATGTC	GTACTTGG	TAGGTGCT	AGCTTGCA	AGTGACTC	TACGAGTC	GTGCGTAT	CGACACAT	TCGACTAG	TCACGGTA	ATGGTGCT	GTACTGTG	CGATTGTG	CACAAGTC	CAACTGAC	TCGTTGGA	TGAGTTGC	TCTCGGAA	CGACTACA	ATCCGTAG
f	F1	F2	F3	F4	F5	F6	F7	F8	F9	F10	F11	F12	F13	F14	F15	F16	F17	F18	F19	F20	F21	F22	F23	F24
	RT1-217	RT1-218	RT1-219	RT1-220	RT1-221	RT1-222	RT1-223	RT1-224	RT1-225	RT1-226	RT1-227	RT1-228	RT1-229	RT1-230	RT1-231	RT1-232	RT1-233	RT1-234	RT1-235	RT1-236	RT1-237	RT1-238	RT1-239	RT1-240
	ATTCGCAG	TAACCGTG	AGGAGGAA	GTCGCTAA	ATAGGCTC	GAGAGGAA	ACACAGCT	CGACGTAT	ACATGCCA	GTTCCAAG	GCGTGATT	TGATGCTG	TACCGATG	TACAGGCT	AGCTTACG	GAGTTCCA	GCTGCATA	TACCACGA	ACACACGT	CTGCAACA	GTAGACCT	TGCCAGTA	AGCGTTAC	GTAGTCCA
g	G1	G2	G3	G4	G5	G6	G7	G8	G9	G10	G11	G12	G13	G14	G15	G16	G17	G18	G19	G20	G21	G22	G23	G24
	RT1-241	RT1-242	RT1-243	RT1-244	RT1-245	RT1-246	RT1-247	RT1-248	RT1-249	RT1-250	RT1-251	RT1-252	RT1-253	RT1-254	RT1-255	RT1-256	RT1-257	RT1-258	RT1-259	RT1-260	RT1-261	RT1-262	RT1-263	RT1-264
	GGCTAATC	CACGAGTT	CGAACTGT	GATTCGCA	ACCGTTAG	CCGATAGT	GAATCGTC	GTAGGTCT	GATTCGGT	TGGCATCA	GTTGTGAC	GTGTAGCT	GGTCAATC	TGTCGATG	CCAACTAG	AATCCGCA	GCTACAAC	CGATTCAG	GTACGACT	CGACATAC	ATAGCGTC	AACCAGTC	GGCTTAAC	ACAGCTAC
h	H1	H2	H3	H4	H5	H6	H7	H8	H9	H10	H11	H12	H13	H14	H15	H16	H17	H18	H19	H20	H21	H22	H23	H24
	RT1-265	RT1-266	RT1-267	RT1-268	RT1-269	RT1-270	RT1-271	RT1-272	RT1-273	RT1-274	RT1-275	RT1-276	RT1-277	RT1-278	RT1-279	RT1-280	RT1-281	RT1-282	RT1-283	RT1-284	RT1-285	RT1-286	RT1-287	RT1-288
	TGCACTGA	GTTGCGAT	CGAATCGT	GTGCATGT	AGTTGCTG	GTAACGCT	CGAACACT	GGAACTCT	AGTCGTAC	ACGGTTAC	ATTGGCAC	CAGTCCAA	TCCTTCTC	TAGTCAGC	ACGACATC	GTTGTCAG	CATGGTTG	GCGTTGTA	GGAGTCTT	AACGCTGT	ACGAACTC	CCTTCTTC	CATACGTG	ACATTGGC
i	I1	I2	I3	I4	I5	I6	I7	I8	I9	I10	I11	I12	I13	I14	I15	I16	I17	I18	I19	I20	I21	I22	I23	I24
	RT1-289	RT1-290	RT1-291	RT1-292	RT1-293	RT1-294	RT1-295	RT1-296	RT1-297	RT1-298	RT1-299	RT1-300	RT1-301	RT1-302	RT1-303	RT1-304	RT1-305	RT1-306	RT1-307	RT1-308	RT1-309	RT1-310	RT1-311	RT1-312
	ATTGGCGT	CACAATCG	CTAGACCA	TACGGATC	AGCAACTC	AAGTCGCT	ACAGCACT	ATCTACGG	CTATAGGC	AAGCTCCA	CAATCCAG	ATGCAGCT	AACCGTAC	CTCTCTCT	AGCCTAAC	CTAAGCCA	AAGGAGGA	GCAAGCTT	CACAGTAC	ATGCACCA	GTGACACT	ATTGCTGG	TCGACCAA	CGTAACTG
j	J1	J2	J3	J4	J5	J6	J7	J8	J9	J10	J11	J12	J13	J14	J15	J16	J17	J18	J19	J20	J21	J22	J23	J24
	RT1-313	RT1-314	RT1-315	RT1-316	RT1-317	RT1-318	RT1-319	RT1-320	RT1-321	RT1-322	RT1-323	RT1-324	RT1-325	RT1-326	RT1-327	RT1-328	RT1-329	RT1-330	RT1-331	RT1-332	RT1-333	RT1-334	RT1-335	RT1-336
	CACTGCAA	CAAGACTC	GTGCTCAA	GGTGCATT	GTGTGGTT	GCCAACTA	TACTGTGG	CTACGACA	TACCGAAC	AGGCCATT	CGACCTAA	CTGTGAGT	CAGACGTT	CGAATCCA	TCCATGAG	TCATGGTG	CTAACACG	TCTTCCTC	GCGTTAGT	CTCCTCTT	CGCATGAT	GACCACTA	TATGGCTG	GCATGTAC
k	K1	K2	K3	K4	K5	K6	K7	K8	K9	K10	K11	K12	K13	K14	K15	K16	K17	K18	K19	K20	K21	K22	K23	K24
	RT1-337	RT1-338	RT1-339	RT1-340	RT1-341	RT1-342	RT1-343	RT1-344	RT1-345	RT1-346	RT1-347	RT1-348	RT1-349	RT1-350	RT1-351	RT1-352	RT1-353	RT1-354	RT1-355	RT1-356	RT1-357	RT1-358	RT1-359	RT1-360
	TCTCCTCT	ACCAACGT	GTAGTGTC	TCTCAAGG	TATGGCCA	TACACGTG	ACTTCAGG	ACCACTGA	GCTCTGAA	CAAGTGTC	TGCATGGT	GCAGTCAT	ACTACGGT	AACTGTGC	ACGCACTA	AGTCATGC	TGTATGGC	GTGGTCTA	AGTATCCG	TATTGCGG	CGTAGCAT	ACCAAGTC	CGTGATGT	CCATCGAA
l	L1	L2	L3	L4	L5	L6	L7	L8	L9	L10	L11	L12	L13	L14	L15	L16	L17	L18	L19	L20	L21	L22	L23	L24
	RT1-361	RT1-362	RT1-363	RT1-364	RT1-365	RT1-366	RT1-367	RT1-368	RT1-369	RT1-370	RT1-371	RT1-372	RT1-373	RT1-374	RT1-375	RT1-376	RT1-377	RT1-378	RT1-379	RT1-380	RT1-381	RT1-382	RT1-383	RT1-384
	CTAGGATC	ACACGCAT	TGCGGATT	CGACCATA	TCGCACAA	AGCTGTTG	GAACTTCG	TGGTGATC	CGATAGCT	ATCCGCAA	CGCTAGTA	CGCAACAT	GACCTACA	AGGAAGGA	CAACATGC	CCAATAGC	TCGAGTTG	GCGCAATT	ACCATGTG	CACACTAG	TGCAATGC	GCAATGTC	TGGTCTGA	GTCATGTG
m	M1	M2	M3	M4	M5	M6	M7	M8	M9	M10	M11	M12	M13	M14	M15	M16	M17	M18	M19	M20	M21	M22	M23	M24
	RT1-385	RT1-386	RT1-387	RT1-388	RT1-389	RT1-390	RT1-391	RT1-392	RT1-393	RT1-394	RT1-395	RT1-396	RT1-397	RT1-398	RT1-399	RT1-400	RT1-401	RT1-402	RT1-403	RT1-404	RT1-405	RT1-406	RT1-407	RT1-408
	GTCATGCA	GGTACACT	TCAAGCAC	GCAAGTTC	GGTATCGT	ATGTCCAG	ACTCTGAG	GGCCAATT	CATTGTGG	GATTGGTC	TCAGGCAT	TGCGGTTA	GACATGCT	TAAGCTGC	AGCGTATC	ATTGCCGA	TAGGTTGC	TGGCAACT	GCATCTAG	GCCAATTG	TGCCAGAT	TAGCGTCA	ACCAAGCT	AGCATGTC
n	N1	N2	N3	N4	N5	N6	N7	N8	N9	N10	N11	N12	N13	N14	N15	N16	N17	N18	N19	N20	N21	N22	N23	N24
	RT1-409	RT1-410	RT1-411	RT1-412	RT1-413	RT1-414	RT1-415	RT1-416	RT1-417	RT1-418	RT1-419	RT1-420	RT1-421	RT1-422	RT1-423	RT1-424	RT1-425	RT1-426	RT1-427	RT1-428	RT1-429	RT1-430	RT1-431	RT1-432
	GCGCTTAA	GTTACCGA	GGACTTGT	TGACCATG	ACCGTGAT	ATGCAGTC	CGTAGTGT	AGGTTCAC	TGGTTGCA	TAGCCGAT	CAGTACCA	CAATTGGC	TGCTAGGT	AACGTCAC	CCGATGTA	GGTTAGCT	GTCAGTAC	CAATCGGT	GCGTGTAT	GCATGTGT	GTTGAGTC	CACTACAG	GTATGGTC	TCGCTGAA
o	O1	O2	O3	O4	O5	O6	O7	O8	O9	O10	O11	O12	O13	O14	O15	O16	O17	O18	O19	O20	O21	O22	O23	O24
	RT1-433	RT1-434	RT1-435	RT1-436	RT1-437	RT1-438	RT1-439	RT1-440	RT1-441	RT1-442	RT1-443	RT1-444	RT1-445	RT1-446	RT1-447	RT1-448	RT1-449	RT1-450	RT1-451	RT1-452	RT1-453	RT1-454	RT1-455	RT1-456
	CTCAAGAC	GCCATGAT	ATTGTGGC	AGCACTTG	TCACACGA	CCACTAAG	TACCGTGA	GCCATCAA	GGCTATCA	GGTCCAAT	GTGAGTTC	ATGGTCCA	GGAAGAAG	GAGACCTT	AGCTCATG	CTCACAGA	GAATCCAC	CGTCGATA	TCCAGTGA	CGCAATAC	AGTGTCTG	CAACTAGC	ATACCACG	TAGGCTGT
p	P1	P2	P3	P4	P5	P6	P7	P8	P9	P10	P11	P12	P13	P14	P15	P16	P17	P18	P19	P20	P21	P22	P23	P24
	RT1-457	RT1-458	RT1-459	RT1-460	RT1-461	RT1-462	RT1-463	RT1-464	RT1-465	RT1-466	RT1-467	RT1-468	RT1-469	RT1-470	RT1-471	RT1-472	RT1-473	RT1-474	RT1-475	RT1-476	RT1-477	RT1-478	RT1-479	RT1-480
	ATGAGCTC	TACGTGCA	ACGCCATA	TACAGCGT	GGTGATTC	TAGGCCAT	TGCAGACT	GAGAGAAG	CTACGAAC	AACACCAC	ACGTATCG	ACACTCGA	GTACATCG	GCTTGATG	TCGAGACT	CTGGTATG	GTCACGTA	ACGTGTGT	TCAGCGTA	AGAAGAGG	TATCCGGA	ACGACTCA	AGTTCTGG	CGAACTCA

## Sheet: PCR primers
	Illumina PCR primers with index (from TruSeq smallRNA kit)
	Universal primer	RNA PCR Primer (RP1), part # 15013198
		5’	AATGATACGGCGACCACCGAGATCTACACGTTCAGAGTTCTACAGTCCGA
		RNA PCR Primer - indexed
		Name	Adapter sequence 5' to 3'	Index adapter sequence	Index read sequence in CelSeq2
	Set A Indices	RPI1	CAAGCAGAAGACGGCATACGAGATCGTGATGTGACTGGAGTTCCTTGGCACCCGAGAATTCCA	CGTGAT	ATCACG
		RPI2	CAAGCAGAAGACGGCATACGAGATACATCGGTGACTGGAGTTCCTTGGCACCCGAGAATTCCA	ACATCG	CGATGT
		RPI3	CAAGCAGAAGACGGCATACGAGATGCCTAAGTGACTGGAGTTCCTTGGCACCCGAGAATTCCA	GCCTAA	TTAGGC
		RPI4	CAAGCAGAAGACGGCATACGAGATTGGTCAGTGACTGGAGTTCCTTGGCACCCGAGAATTCCA	TGGTCA	TGACCA
		RPI5	CAAGCAGAAGACGGCATACGAGATCACTGTGTGACTGGAGTTCCTTGGCACCCGAGAATTCCA	CACTGT	ACAGTG
		RPI6	CAAGCAGAAGACGGCATACGAGATATTGGCGTGACTGGAGTTCCTTGGCACCCGAGAATTCCA	ATTGGC	GCCAAT
		RPI7	CAAGCAGAAGACGGCATACGAGATGATCTGGTGACTGGAGTTCCTTGGCACCCGAGAATTCCA	GATCTG	CAGATC
		RPI8	CAAGCAGAAGACGGCATACGAGATTCAAGTGTGACTGGAGTTCCTTGGCACCCGAGAATTCCA	TCAAGT	ACTTGA
		RPI9	CAAGCAGAAGACGGCATACGAGATCTGATCGTGACTGGAGTTCCTTGGCACCCGAGAATTCCA	CTGATC	GATCAG
		RPI10	CAAGCAGAAGACGGCATACGAGATAAGCTAGTGACTGGAGTTCCTTGGCACCCGAGAATTCCA	AAGCTA	TAGCTT
		RPI11	CAAGCAGAAGACGGCATACGAGATGTAGCCGTGACTGGAGTTCCTTGGCACCCGAGAATTCCA	GTAGCC	GGCTAC	Note: Not suitable for NextSeq500
		RPI12	CAAGCAGAAGACGGCATACGAGATTACAAGGTGACTGGAGTTCCTTGGCACCCGAGAATTCCA	TACAAG	CTTGTA
			Index sequence is 6 bases as underlined; please enter only these 6 bases on the sample sheet. Please note the index sequence is read in the reverse complement in TruSeq small RNA libraries.
	Set D Indices	RPI37	CAAGCAGAAGACGGCATACGAGATATTCCGGTGACTGGAGTTCCTTGGCACCCGAGAATTCCA	ATTCCG	CGGAAT	Note: Not suitable for NextSeq500
		RPI38	CAAGCAGAAGACGGCATACGAGATAGCTAGGTGACTGGAGTTCCTTGGCACCCGAGAATTCCA	AGCTAG	CTAGCT
		RPI39	CAAGCAGAAGACGGCATACGAGATGTATAGGTGACTGGAGTTCCTTGGCACCCGAGAATTCCA	GTATAG	CTATAC
		RPI40	CAAGCAGAAGACGGCATACGAGATTCTGAGGTGACTGGAGTTCCTTGGCACCCGAGAATTCCA	TCTGAG	CTCAGA
		RPI41	CAAGCAGAAGACGGCATACGAGATGTCGTCGTGACTGGAGTTCCTTGGCACCCGAGAATTCCA	GTCGTC	GACGAC
		RPI42	CAAGCAGAAGACGGCATACGAGATCGATTAGTGACTGGAGTTCCTTGGCACCCGAGAATTCCA	CGATTA	TAATCG
		RPI43	CAAGCAGAAGACGGCATACGAGATGCTGTAGTGACTGGAGTTCCTTGGCACCCGAGAATTCCA	GCTGTA	TACAGC
		RPI44	CAAGCAGAAGACGGCATACGAGATATTATAGTGACTGGAGTTCCTTGGCACCCGAGAATTCCA	ATTATA	TATAAT
		RPI45	CAAGCAGAAGACGGCATACGAGATGAATGAGTGACTGGAGTTCCTTGGCACCCGAGAATTCCA	GAATGA	TCATTC
		RPI46	CAAGCAGAAGACGGCATACGAGATTCGGGAGTGACTGGAGTTCCTTGGCACCCGAGAATTCCA	TCGGGA	TCCCGA
		RPI47	CAAGCAGAAGACGGCATACGAGATCTTCGAGTGACTGGAGTTCCTTGGCACCCGAGAATTCCA	CTTCGA	TCGAAG
		RPI48	CAAGCAGAAGACGGCATACGAGATTGCCGAGTGACTGGAGTTCCTTGGCACCCGAGAATTCCA	TGCCGA	TCGGCA
