# Supplementary material for: CD146-assisted isolation and multi-omics characterisation of human pluripotent stem cell derived cranial Schwann cell precursor-like cells.
Source: Research Square preprint supplement (doi:10.21203/rs.3.rs-3324198/v1), 2023-09-19
Supplement: Supplementary file 3 [file 18d2baded12513bd294afa20.xlsx]

## Sheet: LC-MS
LC-MS Metabolomics Data
Metabolite	t-statistic	p-value	BH Adjusted p-value	fold change	standard error
D-Fructose-1-6-bisphosphate	-24.9456	7.08462e-07	8.6381e-05	-2.26262	0.0907023				Significantly different between Pos and Neg cells
alpha-D-Glucose-1-6-bisphosphate-	-23.8982	1.3497e-06	8.6381e-05	-2.27762	0.0953052
D-glucose-6-phosphate	-18.2964	2.77994e-06	0.000118611	-1.71757	0.0938747
D-Fructose-6-phosphate	-20.0157	6.88859e-06	0.000220435	-1.72108	0.0859866
GMP	14.7452	1.15865e-05	0.000296614	1.298	0.0880289
D-ribulose-5-phosphate	-11.0622	0.000189546	0.00404365	-2.98341	0.269695
Thiamin-diphosphate	7.27107	0.000529487	0.00872058	1.62645	0.223688
D-ribose-5-phosphate	-8.37377	0.000545036	0.00872058	-3.28884	0.392755
Glutathione	8.95443	0.000614439	0.00873868	0.914249	0.1021
GDP-mannose	-9.21328	0.000743128	0.00951203	-0.306549	0.0332725
Arginine	-5.53525	0.00176146	0.020497	-0.596278	0.107724
Biotin	-6.18497	0.00265223	0.0226118	-1.59207	0.257409
Phenylacetylglycine	-5.21782	0.0027305	0.0226118	-2.45504	0.47051
dGMP	4.84658	0.00299484	0.0226118	1.04419	0.215449
Cystathionine	4.88812	0.00322126	0.0226118	0.282626	0.0578188
Pantothenate	-4.78313	0.00323616	0.0226118	-0.489573	0.102354
Phosphoenolpyruvate	6.79767	0.003305	0.0226118	1.87015	0.275116
GPE	7.33136	0.00338223	0.0226118	1.24933	0.170409
D-Sorbitol	-7.01543	0.00339241	0.0226118	-2.21473	0.315693
GTP	-6.71311	0.00353309	0.0226118	-0.786665	0.117183
Gluconate	-4.56435	0.00403591	0.0245998	-1.52481	0.33407
Mannitol	-6.28521	0.00602381	0.0342325	-2.72366	0.433344
ADP	6.09274	0.00803043	0.039624	0.817693	0.134208
ATP	-4.69059	0.00803077	0.039624	-0.296778	0.0632711
UDP	6.04388	0.00804862	0.039624	0.815709	0.134965
Glycosylphosphatidylinositol--GPI-	4.52753	0.00891417	0.0422598	0.506705	0.111916
3'5'-Cyclic-AMP	3.92267	0.0143508	0.0656037	2.13745	0.544896
AMP	3.86431	0.0160484	0.0693932	0.796587	0.206139
Uracil	-3.91374	0.016264	0.0693932	-1.03913	0.265509
Acetyl-CoA	-4.06059	0.0176607	0.0729216	-0.816975	0.201196
6-Phospho-D-gluconate	-3.43286	0.0183825	0.07353	-1.17988	0.3437
CTP	-4.40061	0.0200365	0.0751903	-0.300483	0.0682821
[GP(16:0/16:0)]1,2-dihexadecanoyl-sn-glycero-3-phosphate	3.12679	0.0205122	0.0751903	0.704835	0.225418
Thymine	3.8954	0.0205598	0.0751903	0.856841	0.219962
[PC (14:0/14:0)] 1,2-ditetradecanoyl-sn-glycero-3-phosphocholine	3.02635	0.0261376	0.0929336	0.760118	0.251167
Orotidine	-3.46666	0.0303158	0.104876	-0.855602	0.246809
succinate-semialdehyde	-2.77932	0.0336906	0.108625	-1.44294	0.519169
sn-Glycerol-3-phosphate	3.25891	0.0341384	0.108625	1.70732	0.523892
Glycerol-2-phosphate	3.25891	0.0341384	0.108625	1.70732	0.523892
Acetoacetate	-2.71672	0.034794	0.108625	-1.2437	0.457794
D-Glucose	-2.68434	0.0411063	0.123552	-0.323564	0.120538
D-Fructose	-2.63113	0.0415058	0.123552	-0.294153	0.111797
UMP	3.28777	0.0442771	0.127068	1.3569	0.412711
Citrate	-2.82728	0.0446725	0.127068	-0.240441	0.085043
L-2-Aminoadipate	2.55125	0.0500739	0.139336	0.961003	0.37668
GDP	2.55695	0.0512318	0.139525	0.24187	0.0945932
N-Acetylglutamine	2.71452	0.0555911	0.148243	0.995799	0.366842
5--Methylthioadenosine	2.3737	0.0603209	0.154422	0.608713	0.25644
Adenine	2.26502	0.0644998	0.160788	0.23776	0.104971
Isocitrate	-2.46391	0.0653201	0.160788	-0.228036	0.0925505
Cytosine	2.43766	0.0694617	0.165219	1.41612	0.580933
Uridine	2.2524	0.0697018	0.165219	1.15097	0.510998
2-oxobutanoate	-2.20102	0.0710148	0.165271	-0.939959	0.427056
Adenosine	-2.17219	0.0751549	0.166871	-0.845849	0.3894
Asparagine	2.56603	0.0756586	0.166871	0.726132	0.282978
Glycylglycine	2.56603	0.0756586	0.166871	0.726132	0.282978
NADP-	2.16669	0.0771703	0.166871	0.415474	0.191755
DL-Glyceraldehyde-3-phosphate	-2.36475	0.0782208	0.166871	-0.586723	0.248112
GPC	2.16294	0.0813452	0.170692	0.989729	0.457586
Cytidine	2.08446	0.0844633	0.174376	0.833613	0.399918
Thymidine	2.19565	0.0908647	0.184614	0.873196	0.397694
-FA--17-0---heptadecanoic-acid	1.98426	0.094539	0.18712	0.534717	0.269479
Dodecanoic-acid	2.27661	0.0950219	0.18712	0.239851	0.105354
D-Xylose--NPS-	-1.98205	0.0997632	0.19348	-1.01141	0.510284
Isoleucine	-2.0481	0.104961	0.200368	-0.398321	0.194483
Histidine	-2.11107	0.106445	0.200368	-0.565698	0.267968
CoA	1.80172	0.122367	0.226999	0.326212	0.181056
Hexadecanoic-acid	1.69642	0.142143	0.256645	0.244484	0.144117
Guanosine	1.76235	0.142358	0.256645	0.361901	0.205351
Sedoheptulose-7-phosphate	-1.76576	0.164429	0.290519	-1.07999	0.61163
NADH	-1.80802	0.165687	0.290519	-0.332347	0.183819
Decanoic-acid	1.65455	0.174006	0.300983	0.382143	0.230965
Lactose	-1.48608	0.187931	0.316515	-0.595735	0.400875
Glycerone-phosphate	-1.64738	0.197306	0.32799	-1.46815	0.891204
sn-glycero-3-Phosphocholine	1.39344	0.21418	0.351474	0.701288	0.503277
myo-Inositol	-1.40502	0.220888	0.354057	-0.114658	0.0816058
Xanthine	1.47565	0.222232	0.354057	0.667388	0.452266
scyllo-Inositol	-1.39147	0.224052	0.354057	-0.111777	0.0803298
Leucine	-1.34853	0.245698	0.383529	-0.520082	0.385666
Serine--NPS-	1.4009	0.252468	0.389348	0.911621	0.650741
Phenylalanine	1.29723	0.257119	0.390943	0.119788	0.0923413
Malate	-1.25636	0.260861	0.390943	-0.178251	0.141878
Guanine	-1.36418	0.262665	0.390943	-0.655792	0.480721
Lysine	1.28576	0.266371	0.391903	0.485273	0.377421
D-Glucono-1-4-lactone-	-1.18308	0.28779	0.418603	-0.443184	0.374601
Dopamine	1.18576	0.308872	0.44422	0.28509	0.240429
Proline	1.1059	0.315653	0.446935	0.71936	0.650474
Glutamate	-1.14359	0.317743	0.446935	-0.504197	0.440889
2-Ketoglutarate	-1.16625	0.324197	0.451057	-1.54965	1.32875
L-Tryptophan	-1.02795	0.366817	0.504866	-0.0850328	0.0827209
Succinate	-0.962541	0.375146	0.510837	-0.472672	0.491067
NAD-	-0.978786	0.388251	0.523118	-0.130568	0.133398
UDP-glucose	-0.906776	0.420252	0.554462	-0.108531	0.119689
UDP-D-galactose	-0.906776	0.420252	0.554462	-0.108531	0.119689
dAMP	0.858258	0.42451	0.554462	0.850038	0.990421
Norepinephrine	-0.845233	0.430391	0.556465	-0.0771699	0.0913002
sn-glycero-3-Phospho-1-inositol	0.808446	0.461608	0.590859	0.588581	0.72804
alpha-alpha-Trehalose-	-0.801093	0.46763	0.59264	-0.269183	0.336019
L-Norleucine--NPS-	-0.737381	0.489222	0.613926	-0.198071	0.268615
Hypoxanthine	-0.731755	0.505722	0.62847	-0.401178	0.548241
Methionine	-0.687934	0.517652	0.63711	-0.140937	0.20487
D-Galactarate	0.637609	0.548305	0.66841	0.366923	0.575468
Deoxycytidine	0.597491	0.573044	0.691978	0.240395	0.40234
Hydroxyproline	0.592765	0.581118	0.695169	0.487839	0.822989
Ornithine	0.5277	0.617059	0.731329	0.159557	0.302363
FAD	-0.495733	0.639629	0.751124	-0.270231	0.545113
[PR] Retinol Acetate/All-trans-retinyl Acetate	0.484707	0.651563	0.758182	0.227358	0.469063
Glutamine	0.469983	0.66405	0.758915	0.107071	0.227818
Ala-Gly	0.469983	0.66405	0.758915	0.107071	0.227818
Homoserine	0.420331	0.691524	0.783319	0.0674641	0.160502
L-Threonine	0.41056	0.698309	0.784066	0.0657817	0.160224
Inosine	-0.341715	0.74476	0.82895	-0.154064	0.450856
Aspartic-Acid	-0.317858	0.761931	0.840752	-0.0322116	0.10134
L-Valine	0.309436	0.773791	0.846541	0.133516	0.431483
Pyridoxal	0.28734	0.784452	0.850931	0.0324763	0.113024
Betaine	0.266184	0.804115	0.864931	0.108928	0.40922
SM-d18-1-12-0---NPS-	0.249437	0.813005	0.867205	0.176945	0.709375
3-(4-Hydroxyphenyl)pyruvate	0.213968	0.838514	0.887023	0.113755	0.531643
trans-4-Hydroxy-L-proline	0.179215	0.869006	0.911744	0.147535	0.823228
UDP-N-acetyl-D-glucosamine	-0.131219	0.903274	0.932412	-0.0281364	0.214422
5-Aminolevulinate	0.0725056	0.946591	0.969309	0.0600509	0.828223
3-Phosho-D-glycerate	0.0312897	0.976691	0.992194	0.00310144	0.0991202
Choline-phosphate	0.0183067	0.985991	0.993755	0.0049959	0.272899
Tetradecanoics-acid	-0.00620341	0.995252	0.995252	-0.000935181	0.150753
Summary
# Metabolites detected	124
# Significantly changed between Pos and Neg cells	44
