# Supplementary material for: CD146-assisted isolation and multi-omics characterisation of human pluripotent stem cell derived cranial Schwann cell precursor-like cells.
Source: Research Square preprint supplement (doi:10.21203/rs.3.rs-3324198/v1), 2023-09-19
Supplement: Supplementary file 4 [file 1c09ee9e566b8631fdb5b270.xlsx]

## Sheet: Sheet1
Bulk RNA-seq Data
	logFC	FC	AveExpr	t	P.Value	adj.P.Val	B	Entrez_ID	Symbol	Description	Chromosome	Start	End	Strand
ENSG00000189120	-10.2505	0.0008209	2.67939	-36.1282	1.35e-20	1.3e-18	34.0177	80320	SP6	Sp6 transcription factor [Source:HGNC Symbol;Acc:HGNC:14530]	17	47844908	47855874	-1
ENSG00000118733	-9.87198	0.00106718	1.90668	-28.9039	1.42e-18	7.26e-17	30.726	118427	OLFM3	olfactomedin 3 [Source:HGNC Symbol;Acc:HGNC:17990]	1	101802574	101997030	-1
ENSG00000139800	-9.86592	0.00107167	1.85026	-29.7978	7.54e-19	4.22e-17	31.1996	85416	ZIC5	Zic family member 5 [Source:HGNC Symbol;Acc:HGNC:20322]	13	99962964	99971909	-1
ENSG00000043355	-9.76911	0.00114605	1.8561	-26.6095	7.9e-18	3.2e-16	29.4035	7546	ZIC2	Zic family member 2 [Source:HGNC Symbol;Acc:HGNC:12873]	13	99981772	99986773	1
ENSG00000137473	-9.72533	0.00118137	0.174108	-27.5667	3.8e-18	1.66e-16	29.9559	83894	TTC29	tetratricopeptide repeat domain 29 [Source:HGNC Symbol;Acc:HGNC:29936]	4	146706638	146945882	-1
ENSG00000154319	-9.50156	0.00137958	-0.271024	-23.8689	7.44e-17	2.23e-15	27.5713	83648	FAM167A	family with sequence similarity 167 member A [Source:HGNC Symbol;Acc:HGNC:15549]	8	11421463	11474715	-1
ENSG00000255794	-9.39757	0.00148269	1.20272	-14.2935	2.18e-12	2.04e-11	18.414	196475	RMST	rhabdomyosarcoma 2 associated transcript (non-protein coding) [Source:HGNC Symbol;Acc:HGNC:29893]	12	97431653	97565035	1
ENSG00000174963	-9.37058	0.00151069	0.916865	-28.1595	2.44e-18	1.15e-16	30.3044	84107	ZIC4	Zic family member 4 [Source:HGNC Symbol;Acc:HGNC:20393]	3	147386046	147406860	-1
ENSG00000152977	-9.29393	0.00159312	4.21243	-43.257	3.05e-22	5.09e-20	39.0128	7545	ZIC1	Zic family member 1 [Source:HGNC Symbol;Acc:HGNC:12872]	3	147393422	147510293	1
ENSG00000183287	-8.89052	0.0021071	1.78792	-29.8862	7.09e-19	4.01e-17	31.2419	147372	CCBE1	collagen and calcium binding EGF domains 1 [Source:HGNC Symbol;Acc:HGNC:29426]	18	59430940	59697380	-1
ENSG00000228592	-8.71109	0.00238616	-0.702763	-21.0085	1.01e-15	2.2e-14	25.352	266917	D21S2088E	D21S2088E [Source:EntrezGene;Acc:266917]	21	23361104	23384861	-1
ENSG00000276398	-8.64617	0.002496	-0.416464	-19.9861	2.79e-15	5.27e-14	24.4793		RMST_9	Rhabdomyosarcoma 2 associated transcript conserved region 9 [Source:RFAM;Acc:RF01970]	12	97560856	97561048	1
ENSG00000279160	-8.61878	0.00254384	-0.430268	-31.828	1.91e-19	1.26e-17	32.1325		RP11-387A1.6		2	176189919	176192538	-1
ENSG00000185742	-8.61669	0.00254752	-0.284108	-25.7754	1.53e-17	5.7e-16	28.8409	399947	C11orf87	chromosome 11 open reading frame 87 [Source:HGNC Symbol;Acc:HGNC:33788]	11	109422120	109429114	1
ENSG00000140937	-8.35465	0.00305491	5.54543	-42.8347	3.75e-22	6.04e-20	40.4609	1009	CDH11	cadherin 11 [Source:HGNC Symbol;Acc:HGNC:1750]	16	64943753	65126112	-1
ENSG00000275971	-8.27813	0.00322132	-0.935302	-21.9192	4.27e-16	1.04e-14	26.0761		RMST_6	Rhabdomyosarcoma 2 associated transcript conserved region 6 [Source:RFAM;Acc:RF01967]	12	97530656	97530858	1
ENSG00000171956	-8.27573	0.0032267	0.811398	-24.7069	3.66e-17	1.23e-15	28.1621	27023	FOXB1	forkhead box B1 [Source:HGNC Symbol;Acc:HGNC:3799]	15	60004222	60061730	1
ENSG00000278893	-8.27352	0.00323163	2.19677	-22.5812	2.32e-16	6.08e-15	26.8268		RP11-229O3.1		16	64981123	64983227	-1
ENSG00000128645	-8.24064	0.00330612	0.00437159	-29.9849	6.62e-19	3.79e-17	31.2476	3231 102465802	HOXD1	homeobox D1 [Source:HGNC Symbol;Acc:HGNC:5132]	2	176188579	176190907	1
ENSG00000278802	-8.16551	0.00348286	-0.99561	-19.9476	2.9e-15	5.45e-14	24.4232		RMST_8	Rhabdomyosarcoma 2 associated transcript conserved region 8 [Source:RFAM;Acc:RF01969]	12	97560557	97560721	1
ENSG00000273942	-8.1137	0.0036102	-1.02489	-21.6526	5.48e-16	1.28e-14	25.8574		RMST_2	Rhabdomyosarcoma 2 associated transcript conserved region 2 [Source:RFAM;Acc:RF01963]	12	97492462	97492597	1
ENSG00000105605	-7.8992	0.00418893	-1.14148	-30.2031	5.69e-19	3.34e-17	31.275	59284	CACNG7	calcium voltage-gated channel auxiliary subunit gamma 7 [Source:HGNC Symbol;Acc:HGNC:13626]	19	53909335	53943941	1
ENSG00000183691	-7.81518	0.00444012	0.904558	-16.4999	1.3e-13	1.65e-12	21.0371	9241	NOG	noggin [Source:HGNC Symbol;Acc:HGNC:7866]	17	56593699	56595590	1
ENSG00000114654	-7.80999	0.00445613	-0.719829	-19.9686	2.84e-15	5.36e-14	24.4457	79825	EFCC1	EF-hand and coiled-coil domain containing 1 [Source:HGNC Symbol;Acc:HGNC:25692]	3	129001629	129040742	1
ENSG00000163359	-7.80304	0.00447765	-0.405969	-21.9437	4.17e-16	1.02e-14	26.1068	1293	COL6A3	collagen type VI alpha 3 chain [Source:HGNC Symbol;Acc:HGNC:2213]	2	237324003	237414375	-1
ENSG00000187957	-7.73806	0.00468395	-0.44301	-22.4353	2.65e-16	6.84e-15	26.4866	92737	DNER	delta/notch like EGF repeat containing [Source:HGNC Symbol;Acc:HGNC:24456]	2	229357629	229714558	-1
ENSG00000182968	-7.73543	0.00469248	-0.122184	-20.2046	2.24e-15	4.35e-14	24.6691	6656	SOX1	SRY-box 1 [Source:HGNC Symbol;Acc:HGNC:11189]	13	112067647	112070488	1
ENSG00000257060	-7.73224	0.00470288	0.0471175	-16.5036	1.3e-13	1.64e-12	21.0329		RP11-266O8.1		15	93312557	93569483	1
ENSG00000182022	-7.71736	0.00475165	-1.24073	-34.0832	4.56e-20	3.62e-18	33.0153	51363	CHST15	carbohydrate sulfotransferase 15 [Source:HGNC Symbol;Acc:HGNC:18137]	10	124007666	124093607	-1
ENSG00000092068	-7.59902	0.00515784	1.71211	-15.2555	6.12e-13	6.47e-12	19.6424	23428	SLC7A8	solute carrier family 7 member 8 [Source:HGNC Symbol;Acc:HGNC:11066]	14	23125295	23183674	-1
ENSG00000224189	-7.55876	0.00530379	1.74009	-26.1968	1.09e-17	4.24e-16	29.3291	401022	HAGLR	HOXD antisense growth-associated long non-coding RNA [Source:HGNC Symbol;Acc:HGNC:43755]	2	176173195	176188958	-1
ENSG00000211689	-7.53916	0.00537635	-0.873654	-16.3016	1.66e-13	2.02e-12	20.7916	445347	TRGC1	T cell receptor gamma constant 1 [Source:HGNC Symbol;Acc:HGNC:12275]	7	38257879	38265678	-1
ENSG00000111057	-7.51784	0.00545638	0.998356	-17.1239	6.24e-14	8.42e-13	21.7128	3875	KRT18	keratin 18 [Source:HGNC Symbol;Acc:HGNC:6430]	12	52948871	52952901	1
ENSG00000183908	-7.51417	0.00547026	-1.35279	-24.6564	3.81e-17	1.27e-15	28.0234	219527	LRRC55	leucine rich repeat containing 55 [Source:HGNC Symbol;Acc:HGNC:32324]	11	57181747	57191717	1
ENSG00000124491	-7.50073	0.00552149	-1.04479	-14.1153	2.77e-12	2.54e-11	18.1634	2162	F13A1	coagulation factor XIII A chain [Source:HGNC Symbol;Acc:HGNC:3531]	6	6144085	6321013	-1
ENSG00000241202	-7.48205	0.00559345	-1.37255	-24.1198	6e-17	1.86e-15	27.6551		ZIC4-AS1	ZIC4 antisense RNA 1 [Source:HGNC Symbol;Acc:HGNC:40920]	3	147386967	147387453	1
ENSG00000250986	-7.44116	0.00575422	1.92305	-12.2118	4.38e-11	3.06e-10	15.5697		AC141928.1		4	3758748	3763390	-1
ENSG00000274230	-7.43629	0.00577368	-1.3948	-17.9056	2.56e-14	3.81e-13	22.47		RMST_3	Rhabdomyosarcoma 2 associated transcript conserved region 3 [Source:RFAM;Acc:RF01964]	12	97493178	97493286	1
ENSG00000150048	-7.36754	0.00605548	-0.474056	-22.1511	3.44e-16	8.59e-15	26.2596	51267	CLEC1A	C-type lectin domain family 1 member A [Source:HGNC Symbol;Acc:HGNC:24355]	12	10069554	10111627	-1
ENSG00000164929	-7.35219	0.00612026	-0.333749	-21.5903	5.81e-16	1.35e-14	25.8208	79870	BAALC	brain and acute leukemia, cytoplasmic [Source:HGNC Symbol;Acc:HGNC:14333]	8	103140710	103230305	1
ENSG00000275231	-7.34089	0.00616837	-0.804674	-16.6292	1.12e-13	1.43e-12	21.1525		RMST_4	Rhabdomyosarcoma 2 associated transcript conserved region 4 [Source:RFAM;Acc:RF01965]	12	97493897	97494003	1
ENSG00000143850	-7.25952	0.00652631	-0.133235	-15.0112	8.39e-13	8.63e-12	19.298	22874	PLEKHA6	pleckstrin homology domain containing A6 [Source:HGNC Symbol;Acc:HGNC:17053]	1	204218851	204377665	-1
ENSG00000256463	-7.23619	0.00663268	1.3986	-20.7041	1.36e-15	2.83e-14	25.1673	27164	SALL3	spalt like transcription factor 3 [Source:HGNC Symbol;Acc:HGNC:10527]	18	78980275	79002677	1
ENSG00000137959	-7.22947	0.00666364	-0.396049	-17.3309	4.91e-14	6.79e-13	21.9099	10964	IFI44L	interferon induced protein 44 like [Source:HGNC Symbol;Acc:HGNC:17817]	1	78619922	78646145	1
ENSG00000111218	-7.21083	0.0067503	-1.19593	-16.8091	9.03e-14	1.18e-12	21.3347	56341	PRMT8	protein arginine methyltransferase 8 [Source:HGNC Symbol;Acc:HGNC:5188]	12	3381349	3593973	1
ENSG00000225968	-7.14588	0.00706117	-0.915012	-21.0108	1.01e-15	2.2e-14	25.3191	392617	ELFN1	extracellular leucine rich repeat and fibronectin type III domain containing 1 [Source:HGNC Symbol;Acc:HGNC:33154]	7	1688119	1747954	1
ENSG00000140287	-7.12603	0.00715896	0.580146	-13.067	1.22e-11	9.66e-11	16.7693	3067	HDC	histidine decarboxylase [Source:HGNC Symbol;Acc:HGNC:4855]	15	50241947	50266026	-1
ENSG00000263146	-7.11048	0.00723657	-1.25186	-21.3568	7.25e-16	1.64e-14	25.5828		RP11-849I19.1		18	78976555	78979074	-1
ENSG00000196549	-7.0888	0.00734615	0.837738	-19.163	6.54e-15	1.14e-13	23.7396	4311	MME	membrane metallo-endopeptidase [Source:HGNC Symbol;Acc:HGNC:7154]	3	155024124	155183729	1
ENSG00000170178	-6.9955	0.00783692	-1.63486	-27.6119	3.67e-18	1.62e-16	29.7912	3238	HOXD12	homeobox D12 [Source:HGNC Symbol;Acc:HGNC:5135]	2	176099730	176101193	1
ENSG00000007062	-6.9638	0.00801103	2.28113	-24.9525	2.98e-17	1.03e-15	29.0341	8842	PROM1	prominin 1 [Source:HGNC Symbol;Acc:HGNC:9454]	4	15963076	16084378	-1
ENSG00000162551	-6.92928	0.00820501	1.62031	-28.5562	1.83e-18	8.93e-17	30.9435	249	ALPL	alkaline phosphatase, liver/bone/kidney [Source:HGNC Symbol;Acc:HGNC:438]	1	21509372	21578412	1
ENSG00000179796	-6.91961	0.0082602	-0.716484	-22.8835	1.77e-16	4.78e-15	26.7958	116135	LRRC3B	leucine rich repeat containing 3B [Source:HGNC Symbol;Acc:HGNC:28105]	3	26622806	26710776	1
ENSG00000273570	-6.88474	0.00846226	-1.37587	-19.7568	3.53e-15	6.51e-14	24.2082		RMST_5	Rhabdomyosarcoma 2 associated transcript conserved region 5 [Source:RFAM;Acc:RF01966]	12	97495932	97496057	1
ENSG00000253851	-6.84224	0.00871526	-1.40131	-21.7032	5.22e-16	1.23e-14	25.8408		RP11-318M2.3		8	103228425	103229314	-1
ENSG00000082684	-6.82832	0.00879976	-0.519983	-16.3079	1.64e-13	2.01e-12	20.7994	54437	SEMA5B	semaphorin 5B [Source:HGNC Symbol;Acc:HGNC:10737]	3	122909193	123028605	-1
ENSG00000066468	-6.76929	0.00916728	2.10757	-11.8533	7.64e-11	5.06e-10	15.0232	2263	FGFR2	fibroblast growth factor receptor 2 [Source:HGNC Symbol;Acc:HGNC:3689]	10	121478334	121598458	-1
ENSG00000145569	-6.75828	0.00923753	2.36103	-15.9924	2.42e-13	2.84e-12	20.69	54491	FAM105A	family with sequence similarity 105 member A [Source:HGNC Symbol;Acc:HGNC:25629]	5	14581775	14615007	1
ENSG00000134817	-6.74139	0.00934632	-1.45302	-23.4179	1.1e-16	3.16e-15	27.1245	187	APLNR	apelin receptor [Source:HGNC Symbol;Acc:HGNC:339]	11	57233577	57237314	-1
ENSG00000117318	-6.72713	0.00943913	3.48775	-23.2547	1.27e-16	3.57e-15	28.1437	3399	ID3	inhibitor of DNA binding 3, HLH protein [Source:HGNC Symbol;Acc:HGNC:5362]	1	23557918	23559794	-1
ENSG00000050555	-6.68252	0.00973553	0.186942	-16.7124	1.01e-13	1.31e-12	21.2569	10319	LAMC3	laminin subunit gamma 3 [Source:HGNC Symbol;Acc:HGNC:6494]	9	131009082	131094473	1
ENSG00000125851	-6.65979	0.00989019	0.247439	-19.1851	6.39e-15	1.11e-13	23.7464	5126	PCSK2	proprotein convertase subtilisin/kexin type 2 [Source:HGNC Symbol;Acc:HGNC:8744]	20	17226107	17484578	1
ENSG00000149256	-6.62681	0.0101188	2.31566	-28.0057	2.74e-18	1.26e-16	31.2487	26011	TENM4	teneurin transmembrane protein 4 [Source:HGNC Symbol;Acc:HGNC:29945]	11	78652831	79440948	-1
ENSG00000145934	-6.61853	0.0101771	0.619556	-15.5105	4.42e-13	4.83e-12	19.901	57451	TENM2	teneurin transmembrane protein 2 [Source:HGNC Symbol;Acc:HGNC:29943]	5	167284799	168264157	1
ENSG00000141052	-6.61428	0.0102071	1.06347	-12.5575	2.59e-11	1.9e-10	16.055	93649	MYOCD	myocardin [Source:HGNC Symbol;Acc:HGNC:16067]	17	12665890	12768949	1
ENSG00000232650	-6.59864	0.0103184	-0.571991	-18.3209	1.62e-14	2.52e-13	22.8981		RP5-834N19.1		1	119328176	119356182	1
ENSG00000259223	-6.5985	0.0103194	-1.53098	-22.9827	1.62e-16	4.43e-15	26.795		RP11-82L7.4		15	60073554	60118320	-1
ENSG00000164116	-6.56185	0.0105849	-0.271539	-27.4636	4.1e-18	1.78e-16	29.8214	2982	GUCY1A3	guanylate cyclase 1 soluble subunit alpha [Source:HGNC Symbol;Acc:HGNC:4685]	4	155666711	155732349	1
ENSG00000102195	-6.54286	0.0107251	-1.55972	-17.4524	4.27e-14	6.01e-13	21.9824	9248	GPR50	G protein-coupled receptor 50 [Source:HGNC Symbol;Acc:HGNC:4506]	X	151176653	151181465	1
ENSG00000052850	-6.54181	0.0107329	2.27156	-15.246	6.19e-13	6.54e-12	19.776	60529	ALX4	ALX homeobox 4 [Source:HGNC Symbol;Acc:HGNC:450]	11	44260444	44310166	-1
ENSG00000204950	-6.5346	0.0107867	1.66422	-13.554	6.06e-12	5.13e-11	17.5116	390205	LRRC10B	leucine rich repeat containing 10B [Source:HGNC Symbol;Acc:HGNC:37215]	11	61508800	61511018	1
ENSG00000148053	-6.52172	0.0108835	-0.461881	-10.0819	1.45e-09	7.38e-09	12.1271	4915	NTRK2	neurotrophic receptor tyrosine kinase 2 [Source:HGNC Symbol;Acc:HGNC:8032]	9	84668551	85027070	1
ENSG00000166923	-6.51072	0.0109667	0.0939875	-22.0662	3.72e-16	9.22e-15	26.2	26585	GREM1	gremlin 1, DAN family BMP antagonist [Source:HGNC Symbol;Acc:HGNC:2001]	15	32717974	32745107	1
ENSG00000204767	-6.48783	0.0111422	-1.59411	-24.4694	4.46e-17	1.46e-15	27.8262	100131897	FAM196B	family with sequence similarity 196 member B [Source:HGNC Symbol;Acc:HGNC:37271]	5	169864264	169980740	-1
ENSG00000135824	-6.47047	0.011277	-0.640608	-17.3369	4.88e-14	6.75e-13	21.9006	85397	RGS8	regulator of G-protein signaling 8 [Source:HGNC Symbol;Acc:HGNC:16810]	1	182641816	182684576	-1
ENSG00000143167	-6.42796	0.0116142	-0.835925	-20.4806	1.7e-15	3.46e-14	24.8595	10223	GPA33	glycoprotein A33 [Source:HGNC Symbol;Acc:HGNC:4445]	1	167052836	167166479	-1
ENSG00000181234	-6.39721	0.0118645	3.72394	-33.3033	7.4e-20	5.46e-18	35.2714	92293	TMEM132C	transmembrane protein 132C [Source:HGNC Symbol;Acc:HGNC:25436]	12	128267403	128707915	1
ENSG00000232220	-6.38958	0.0119274	-1.64511	-22.2466	3.15e-16	7.95e-15	26.223		AC008440.5		19	53874626	53876049	-1
ENSG00000184905	-6.3874	0.0119454	-1.32889	-18.1145	2.03e-14	3.11e-13	22.6578	140597	TCEAL2	transcription elongation factor A like 2 [Source:HGNC Symbol;Acc:HGNC:29818]	X	102125688	102127711	1
ENSG00000116147	-6.37634	0.0120374	-0.691181	-21.3322	7.43e-16	1.67e-14	25.5765	7143	TNR	tenascin R [Source:HGNC Symbol;Acc:HGNC:11953]	1	175315194	175743770	-1
ENSG00000170412	-6.37601	0.0120401	1.02941	-20.5769	1.55e-15	3.17e-14	25.0918	55890	GPRC5C	G protein-coupled receptor class C group 5 member C [Source:HGNC Symbol;Acc:HGNC:13309]	17	74424851	74451653	1
ENSG00000175426	-6.3507	0.0122532	0.664532	-8.93037	1.2e-08	5.02e-08	10.0479	5122	PCSK1	proprotein convertase subtilisin/kexin type 1 [Source:HGNC Symbol;Acc:HGNC:8743]	5	96390415	96434143	-1
ENSG00000267774	-6.34284	0.0123201	-1.35053	-20.8518	1.18e-15	2.5e-14	25.1359		RP11-2N1.2		18	59696459	59698111	1
ENSG00000174469	-6.33589	0.0123796	0.929479	-24.1637	5.78e-17	1.81e-15	27.8456	26047	CNTNAP2	contactin associated protein-like 2 [Source:HGNC Symbol;Acc:HGNC:13830]	7	146116002	148420998	1
ENSG00000186340	-6.31927	0.012523	1.17358	-15.7913	3.11e-13	3.54e-12	20.3116	7058	THBS2	thrombospondin 2 [Source:HGNC Symbol;Acc:HGNC:11786]	6	169215780	169254044	-1
ENSG00000104722	-6.31132	0.0125922	4.64823	-27.9332	2.89e-18	1.32e-16	31.9974	4741	NEFM	neurofilament, medium polypeptide [Source:HGNC Symbol;Acc:HGNC:7734]	8	24913012	24919098	1
ENSG00000120094	-6.3007	0.0126853	-1.37774	-19.3129	5.59e-15	9.84e-14	23.7902	3211	HOXB1	homeobox B1 [Source:HGNC Symbol;Acc:HGNC:5111]	17	48528526	48530997	-1
ENSG00000041982	-6.28352	0.0128373	2.0055	-17.0334	6.93e-14	9.25e-13	21.8874	3371	TNC	tenascin C [Source:HGNC Symbol;Acc:HGNC:5318]	9	115019578	115118257	-1
ENSG00000280114	-6.2786	0.0128811	-1.38433	-21.7209	5.14e-16	1.21e-14	25.8351		RP5-875O13.7		1	16681097	16688749	-1
ENSG00000074527	-6.27394	0.0129227	-0.357747	-14.3565	2e-12	1.89e-11	18.4745	59277	NTN4	netrin 4 [Source:HGNC Symbol;Acc:HGNC:13658]	12	95657807	95791152	-1
ENSG00000142408	-6.24251	0.0132074	-1.40835	-19.7445	3.57e-15	6.57e-14	24.1751	59283 100126325	CACNG8	calcium voltage-gated channel auxiliary subunit gamma 8 [Source:HGNC Symbol;Acc:HGNC:13628]	19	53963040	53990215	1
ENSG00000155897	-6.23873	0.0132421	-1.72403	-14.7054	1.25e-12	1.24e-11	18.8759	114	ADCY8	adenylate cyclase 8 [Source:HGNC Symbol;Acc:HGNC:239]	8	130780301	131042426	-1
ENSG00000041515	-6.23623	0.013265	0.709287	-12.9356	1.48e-11	1.15e-10	16.5857	23026	MYO16	myosin XVI [Source:HGNC Symbol;Acc:HGNC:29822]	13	108596152	109208007	1
ENSG00000136944	-6.192	0.013678	-1.74951	-13.7083	4.87e-12	4.22e-11	17.6022	4010	LMX1B	LIM homeobox transcription factor 1 beta [Source:HGNC Symbol;Acc:HGNC:6654]	9	126614443	126701032	1
ENSG00000184160	-6.18179	0.0137751	3.12595	-25.2355	2.36e-17	8.49e-16	29.7331	152	ADRA2C	adrenoceptor alpha 2C [Source:HGNC Symbol;Acc:HGNC:283]	4	3766348	3768526	1
ENSG00000277081	-6.1651	0.0139354	-2.08827	-15.967	2.5e-13	2.92e-12	20.3428		RMST_10	Rhabdomyosarcoma 2 associated transcript conserved region 10 [Source:RFAM;Acc:RF01971]	12	97564174	97564327	1
ENSG00000115363	-6.14571	0.014124	-1.53647	-15.6462	3.72e-13	4.15e-12	20.0049	84141	EVA1A	eva-1 homolog A, regulator of programmed cell death [Source:HGNC Symbol;Acc:HGNC:25816]	2	75469302	75569722	-1
ENSG00000029534	-6.12947	0.0142839	-0.573426	-14.4985	1.65e-12	1.6e-11	18.6492	286	ANK1	ankyrin 1 [Source:HGNC Symbol;Acc:HGNC:492]	8	41653220	41896762	-1
ENSG00000166523	-6.12168	0.0143612	-2.11149	-20.3139	2.01e-15	3.97e-14	24.6	26253	CLEC4E	C-type lectin domain family 4 member E [Source:HGNC Symbol;Acc:HGNC:14555]	12	8533305	8540963	-1
ENSG00000114279	-6.09424	0.0146369	2.31658	-22.9434	1.68e-16	4.56e-15	27.6756	2257	FGF12	fibroblast growth factor 12 [Source:HGNC Symbol;Acc:HGNC:3668]	3	192139395	192767764	-1
ENSG00000185652	-6.07461	0.0148374	-1.10154	-16.6349	1.11e-13	1.42e-12	21.1304	4908	NTF3	neurotrophin 3 [Source:HGNC Symbol;Acc:HGNC:8023]	12	5432112	5521536	1
ENSG00000168542	-6.03316	0.01527	3.89238	-34.1108	4.48e-20	3.6e-18	35.8813	1281 100500837	COL3A1	collagen type III alpha 1 chain [Source:HGNC Symbol;Acc:HGNC:2201]	2	188974320	189012746	1
ENSG00000138119	-6.00046	0.0156201	1.65493	-17.9291	2.49e-14	3.73e-13	22.8249	26509	MYOF	myoferlin [Source:HGNC Symbol;Acc:HGNC:3656]	10	93306429	93482317	-1
ENSG00000120708	-5.99924	0.0156332	1.92339	-21.2367	8.14e-16	1.81e-14	26.1055	7045	TGFBI	transforming growth factor beta induced [Source:HGNC Symbol;Acc:HGNC:11771]	5	136028895	136063818	1
ENSG00000176907	-5.9869	0.0157675	0.198319	-18.6585	1.12e-14	1.82e-13	23.2399	56892	C8orf4	chromosome 8 open reading frame 4 [Source:HGNC Symbol;Acc:HGNC:1357]	8	40153455	40155308	1
ENSG00000130720	-5.98404	0.0157988	-1.07668	-16.7731	9.42e-14	1.22e-12	21.2792	84929	FIBCD1	fibrinogen C domain containing 1 [Source:HGNC Symbol;Acc:HGNC:25922]	9	130902438	130939286	-1
ENSG00000256994	-5.94726	0.0162068	-0.47824	-14.3858	1.92e-12	1.83e-11	18.5072		RP11-871F6.3		12	17509353	17589992	-1
ENSG00000260057	-5.94461	0.0162366	-1.88897	-19.1458	6.66e-15	1.15e-13	23.5831	101927364	LINC01571	long intergenic non-protein coding RNA 1571 [Source:HGNC Symbol;Acc:HGNC:51384]	16	51762519	51773173	1
ENSG00000276644	-5.93411	0.0163551	1.72807	-15.3425	5.47e-13	5.86e-12	19.8791	1602	DACH1	dachshund family transcription factor 1 [Source:HGNC Symbol;Acc:HGNC:2663]	13	71437966	71867192	-1
ENSG00000165556	-5.9292	0.0164109	-2.21661	-21.7551	4.98e-16	1.18e-14	25.7466	1045	CDX2	caudal type homeobox 2 [Source:HGNC Symbol;Acc:HGNC:1806]	13	27962137	27971139	-1
ENSG00000132821	-5.92847	0.0164192	-1.33114	-16.0687	2.2e-13	2.61e-12	20.4917	128434	VSTM2L	V-set and transmembrane domain containing 2 like [Source:HGNC Symbol;Acc:HGNC:16096]	20	37903104	37945350	1
ENSG00000204347	-5.91026	0.0166278	0.424136	-13.7179	4.81e-12	4.18e-11	17.6513	388419	BTBD17	BTB domain containing 17 [Source:HGNC Symbol;Acc:HGNC:33758]	17	74356416	74361946	-1
ENSG00000153233	-5.89401	0.0168161	-1.59552	-19.2167	6.18e-15	1.08e-13	23.672	5801	PTPRR	protein tyrosine phosphatase, receptor type R [Source:HGNC Symbol;Acc:HGNC:9680]	12	70638073	70920843	-1
ENSG00000213943	-5.8796	0.016985	-1.60675	-16.7213	1e-13	1.3e-12	21.1941		KRT18P17	keratin 18 pseudogene 17 [Source:HGNC Symbol;Acc:HGNC:33385]	3	12787393	12788671	-1
ENSG00000128710	-5.84662	0.0173776	3.8277	-40.7679	1.06e-21	1.51e-19	39.317	3236	HOXD10	homeobox D10 [Source:HGNC Symbol;Acc:HGNC:5133]	2	176108790	176119942	1
ENSG00000224577	-5.83725	0.017491	-1.15973	-17.3758	4.66e-14	6.49e-13	21.9076	102724224	LINC01117	long intergenic non-protein coding RNA 1117 [Source:HGNC Symbol;Acc:HGNC:49260]	2	176637710	176655958	1
ENSG00000091129	-5.83365	0.0175346	3.24749	-23.1899	1.35e-16	3.76e-15	28.1241	4897	NRCAM	neuronal cell adhesion molecule [Source:HGNC Symbol;Acc:HGNC:7994]	7	108147623	108456717	-1
ENSG00000224717	-5.82785	0.0176053	-1.80097	-15.3865	5.17e-13	5.58e-12	19.683		RP11-576D8.4		1	205455929	205469024	1
ENSG00000272163	-5.8272	0.0176132	3.08068	-18.5489	1.26e-14	2.03e-13	23.6579		GS1-72M22.1		8	24912165	24914717	-1
ENSG00000128713	-5.80637	0.0178694	3.07937	-32.719	1.07e-19	7.59e-18	34.78	3237	HOXD11	homeobox D11 [Source:HGNC Symbol;Acc:HGNC:5134]	2	176104216	176109754	1
ENSG00000186479	-5.80589	0.0178753	-2.28406	-25.2133	2.41e-17	8.63e-16	28.151	401190	RGS7BP	regulator of G-protein signaling 7 binding protein [Source:HGNC Symbol;Acc:HGNC:23271]	5	64506257	64612312	1
ENSG00000125845	-5.80066	0.0179402	-0.310764	-14.8291	1.06e-12	1.07e-11	19.0624	650	BMP2	bone morphogenetic protein 2 [Source:HGNC Symbol;Acc:HGNC:1069]	20	6767664	6780280	1
ENSG00000162670	-5.79577	0.0180011	-1.81942	-17.5759	3.71e-14	5.28e-13	22.0696	339479	BRINP3	BMP/retinoic acid inducible neural specific 3 [Source:HGNC Symbol;Acc:HGNC:22393]	1	190097662	190478404	-1
ENSG00000268869	-5.79386	0.0180249	-0.934371	-15.9701	2.49e-13	2.91e-12	20.3938	284729	ESPNP	espin pseudogene [Source:HGNC Symbol;Acc:HGNC:23285]	1	16687339	16720157	-1
ENSG00000159167	-5.79262	0.0180404	2.35682	-10.1217	1.36e-09	6.91e-09	12.0783	6781	STC1	stanniocalcin 1 [Source:HGNC Symbol;Acc:HGNC:11373]	8	23841915	23854807	-1
ENSG00000168505	-5.7867	0.0181147	-1.64932	-17.2116	5.64e-14	7.66e-13	21.7075	2637	GBX2	gastrulation brain homeobox 2 [Source:HGNC Symbol;Acc:HGNC:4186]	2	236165236	236168369	-1
ENSG00000243620	-5.76941	0.018333	-1.98885	-17.9626	2.4e-14	3.61e-13	22.441		RP11-649A16.1		3	146909685	147370656	-1
ENSG00000198865	-5.72158	0.018951	0.367711	-14.9321	9.3e-13	9.48e-12	19.1999	100129792	CCDC152	coiled-coil domain containing 152 [Source:HGNC Symbol;Acc:HGNC:34438]	5	42756801	42802360	1
ENSG00000281406	-5.71235	0.0190727	-0.757822	-17.6096	3.57e-14	5.12e-13	22.1643		BLACAT1	bladder cancer associated transcript 1 (non-protein coding) [Source:HGNC Symbol;Acc:HGNC:48597]	1	205434886	205437879	-1
ENSG00000116106	-5.68849	0.0193907	4.43529	-43.4821	2.74e-22	4.64e-20	40.904	2043	EPHA4	EPH receptor A4 [Source:HGNC Symbol;Acc:HGNC:3388]	2	221418027	221574202	-1
ENSG00000179820	-5.68119	0.0194891	0.736172	-24.2411	5.41e-17	1.71e-15	27.988	91663	MYADM	myeloid associated differentiation marker [Source:HGNC Symbol;Acc:HGNC:7544]	19	53866223	53876437	1
ENSG00000186007	-5.67943	0.0195129	-0.849	-15.2451	6.2e-13	6.54e-12	19.5515	93273	LEMD1	LEM domain containing 1 [Source:HGNC Symbol;Acc:HGNC:18725]	1	205381378	205457091	-1
ENSG00000166501	-5.6778	0.0195349	0.719765	-18.4088	1.47e-14	2.31e-13	23.0955	5579	PRKCB	protein kinase C beta [Source:HGNC Symbol;Acc:HGNC:9395]	16	23836001	24220611	1
ENSG00000186462	-5.67658	0.0195515	0.955803	-12.1762	4.63e-11	3.23e-10	15.5147	4674	NAP1L2	nucleosome assembly protein 1 like 2 [Source:HGNC Symbol;Acc:HGNC:7638]	X	73212299	73214848	-1
ENSG00000214814	-5.67014	0.0196389	-2.03543	-18.4712	1.37e-14	2.18e-13	22.9262	654463	FER1L6	fer-1 like family member 6 [Source:HGNC Symbol;Acc:HGNC:28065]	8	123851987	124120061	1
ENSG00000165023	-5.59899	0.0206318	0.273625	-21.9339	4.21e-16	1.02e-14	26.0873	54769	DIRAS2	DIRAS family GTPase 2 [Source:HGNC Symbol;Acc:HGNC:19323]	9	90609832	90643105	-1
ENSG00000144229	-5.59192	0.0207332	-0.235821	-18.8599	9.02e-15	1.5e-13	23.4122	80731	THSD7B	thrombospondin type 1 domain containing 7B [Source:HGNC Symbol;Acc:HGNC:29348]	2	136765545	137677717	1
ENSG00000109819	-5.58452	0.0208397	-0.0859323	-9.43465	4.67e-09	2.13e-08	10.9816	10891	PPARGC1A	PPARG coactivator 1 alpha [Source:HGNC Symbol;Acc:HGNC:9237]	4	23755041	23904089	-1
ENSG00000172985	-5.57028	0.0210464	0.657483	-21.0811	9.45e-16	2.07e-14	25.5341	344558	SH3RF3	SH3 domain containing ring finger 3 [Source:HGNC Symbol;Acc:HGNC:24699]	2	109129348	109504632	1
ENSG00000074047	-5.56827	0.0210758	1.28771	-16.7325	9.88e-14	1.28e-12	21.4889	2736	GLI2	GLI family zinc finger 2 [Source:HGNC Symbol;Acc:HGNC:4318]	2	120735623	120992653	1
ENSG00000258712	-5.5338	0.0215854	-2.11256	-19.7519	3.55e-15	6.53e-14	24.0824		CXADRP2	coxsackie virus and adenovirus receptor pseudogene 2 [Source:HGNC Symbol;Acc:HGNC:33973]	15	21372793	21373881	-1
ENSG00000109255	-5.529	0.0216573	-1.79363	-15.7991	3.08e-13	3.51e-12	20.153	10874	NMU	neuromedin U [Source:HGNC Symbol;Acc:HGNC:7859]	4	55595229	55636698	-1
ENSG00000144339	-5.51731	0.0218335	0.602268	-16.9751	7.42e-14	9.83e-13	21.6034	23671	TMEFF2	transmembrane protein with EGF like and two follistatin like domains 2 [Source:HGNC Symbol;Acc:HGNC:11867]	2	191949043	192195709	-1
ENSG00000078053	-5.51264	0.0219044	2.42664	-29.2247	1.13e-18	6.02e-17	32.4127	273	AMPH	amphiphysin [Source:HGNC Symbol;Acc:HGNC:471]	7	38383704	38631567	-1
ENSG00000164761	-5.50227	0.0220623	0.877476	-9.61021	3.38e-09	1.59e-08	11.2794	4982	TNFRSF11B	TNF receptor superfamily member 11b [Source:HGNC Symbol;Acc:HGNC:11909]	8	118923557	118952200	-1
ENSG00000174145	-5.49941	0.0221062	0.0920512	-18.9919	7.84e-15	1.33e-13	23.5469	57495	NWD2	NACHT and WD repeat domain containing 2 [Source:HGNC Symbol;Acc:HGNC:29229]	4	37244220	37449465	1
ENSG00000244355	-5.49073	0.0222396	-1.3458	-12.1327	4.95e-11	3.44e-10	15.4011	58530	LY6G6D	lymphocyte antigen 6 complex, locus G6D [Source:HGNC Symbol;Acc:HGNC:13935]	6	31715356	31717804	1
ENSG00000272729	-5.4756	0.022474	-0.636766	-14.9152	9.51e-13	9.66e-12	19.1571		RP11-387A1.5		2	176164164	176165716	-1
ENSG00000279400	-5.47087	0.0225477	0.990098	-14.2898	2.19e-12	2.05e-11	18.489		CTD-2353F22.2		5	36667717	36669958	1
ENSG00000184185	-5.46223	0.0226833	-1.04118	-14.4047	1.87e-12	1.79e-11	18.5123	3768	KCNJ12	potassium voltage-gated channel subfamily J member 12 [Source:HGNC Symbol;Acc:HGNC:6258]	17	21376197	21419872	1
ENSG00000183833	-5.46147	0.0226952	0.100209	-12.8413	1.7e-11	1.3e-10	16.4445	89876	MAATS1	MYCBP associated and testis expressed 1 [Source:HGNC Symbol;Acc:HGNC:24010]	3	119703022	119767102	1
ENSG00000274441	-5.45903	0.0227336	-1.21227	-14.7075	1.25e-12	1.24e-11	18.8844		CTD-2282P23.2		5	36636019	36649347	-1
ENSG00000122641	-5.44345	0.0229805	-1.52463	-14.2111	2.43e-12	2.26e-11	18.2503	3624	INHBA	inhibin beta A subunit [Source:HGNC Symbol;Acc:HGNC:6066]	7	41667168	41705834	-1
ENSG00000157168	-5.43754	0.0230748	0.912703	-9.20398	7.16e-09	3.15e-08	10.5306	3084	NRG1	neuregulin 1 [Source:HGNC Symbol;Acc:HGNC:7997]	8	31639386	32767959	1
ENSG00000128709	-5.39454	0.0237728	2.00454	-23.1077	1.45e-16	3.99e-15	27.8279	3235	HOXD9	homeobox D9 [Source:HGNC Symbol;Acc:HGNC:5140]	2	176122720	176124937	1
ENSG00000182752	-5.39163	0.0238208	2.96423	-13.299	8.71e-12	7.11e-11	17.0917	5069	PAPPA	pappalysin 1 [Source:HGNC Symbol;Acc:HGNC:8602]	9	116153804	116402322	1
ENSG00000075213	-5.38711	0.0238956	3.31982	-37.0514	7.92e-21	8.45e-19	37.367	10371	SEMA3A	semaphorin 3A [Source:HGNC Symbol;Acc:HGNC:10723]	7	83955777	84492724	-1
ENSG00000169116	-5.38381	0.0239504	1.37803	-27.2353	4.88e-18	2.07e-16	30.5581	25849	PARM1	prostate androgen-regulated mucin-like protein 1 [Source:HGNC Symbol;Acc:HGNC:24536]	4	74933095	75050115	1
ENSG00000175183	-5.38109	0.0239955	3.4597	-36.7855	9.22e-21	9.58e-19	37.3002	1466	CSRP2	cysteine and glycine rich protein 2 [Source:HGNC Symbol;Acc:HGNC:2470]	12	76858715	76879060	-1
ENSG00000176092	-5.35488	0.0244355	0.121399	-16.3871	1.49e-13	1.86e-12	20.8867	55057	AIM1L	absent in melanoma 1-like [Source:HGNC Symbol;Acc:HGNC:17295]	1	26321859	26354130	-1
ENSG00000145808	-5.35485	0.0244359	-0.956081	-14.1743	2.56e-12	2.36e-11	18.2204	171019	ADAMTS19	ADAM metallopeptidase with thrombospondin type 1 motif 19 [Source:HGNC Symbol;Acc:HGNC:17111]	5	129460265	129738683	1
ENSG00000198719	-5.33276	0.024813	-0.293673	-7.41741	2.48e-07	8.2e-07	7.04885	28514	DLL1	delta like canonical Notch ligand 1 [Source:HGNC Symbol;Acc:HGNC:2908]	6	170282206	170306565	-1
ENSG00000096696	-5.33247	0.024818	5.44485	-64.0118	7.71e-26	5.59e-23	48.967	1832	DSP	desmoplakin [Source:HGNC Symbol;Acc:HGNC:3052]	6	7541575	7586717	1
ENSG00000197705	-5.33081	0.0248465	-1.90211	-17.1425	6.11e-14	8.25e-13	21.6012	57565	KLHL14	kelch like family member 14 [Source:HGNC Symbol;Acc:HGNC:29266]	18	32672671	32773062	-1
ENSG00000170421	-5.32267	0.0249871	1.00849	-16.9501	7.65e-14	1.01e-12	21.7025	3856	KRT8	keratin 8 [Source:HGNC Symbol;Acc:HGNC:6446]	12	52897187	52949954	-1
ENSG00000165566	-5.31467	0.0251261	-0.72732	-16.3126	1.64e-13	2e-12	20.7778	219287	AMER2	APC membrane recruitment protein 2 [Source:HGNC Symbol;Acc:HGNC:26360]	13	25161684	25172288	-1
ENSG00000112539	-5.30832	0.0252369	-1.61284	-14.5043	1.64e-12	1.58e-11	18.6138	168090	C6orf118	chromosome 6 open reading frame 118 [Source:HGNC Symbol;Acc:HGNC:21233]	6	165279664	165309607	-1
ENSG00000250722	-5.28947	0.0255688	1.18477	-16.0091	2.37e-13	2.78e-12	20.6592	6414	SEPP1	selenoprotein P, plasma, 1 [Source:HGNC Symbol;Acc:HGNC:10751]	5	42799880	42887392	-1
ENSG00000079215	-5.28904	0.0255765	6.07102	-70.7125	9.34e-27	9.85e-24	51.194	6507	SLC1A3	solute carrier family 1 member 3 [Source:HGNC Symbol;Acc:HGNC:10941]	5	36606355	36688334	1
ENSG00000268119	-5.27322	0.0258585	-0.331393	-20.2938	2.05e-15	4.03e-14	24.6979		CTD-2561J22.5		19	21444241	21463908	-1
ENSG00000269113	-5.2695	0.0259251	-1.05268	-14.1549	2.63e-12	2.42e-11	18.1917	388630	TRABD2B	TraB domain containing 2B [Source:HGNC Symbol;Acc:HGNC:44200]	1	47760528	47996895	-1
ENSG00000169783	-5.26598	0.0259885	1.90621	-28.1165	2.52e-18	1.18e-16	31.4902	84894	LINGO1	leucine rich repeat and Ig domain containing 1 [Source:HGNC Symbol;Acc:HGNC:21205]	15	77613027	77820900	-1
ENSG00000169071	-5.25639	0.0261618	2.54506	-26.2468	1.05e-17	4.09e-16	30.4705	4920	ROR2	receptor tyrosine kinase like orphan receptor 2 [Source:HGNC Symbol;Acc:HGNC:10257]	9	91563091	91950162	-1
ENSG00000002587	-5.25432	0.0261995	-0.911471	-13.0077	1.33e-11	1.04e-10	16.6626	9957	HS3ST1	heparan sulfate-glucosamine 3-sulfotransferase 1 [Source:HGNC Symbol;Acc:HGNC:5194]	4	11393150	11429765	-1
ENSG00000274499	-5.2289	0.0266652	-0.874958	-16.385	1.5e-13	1.86e-12	20.8501		RP11-403B2.10		15	20803505	20826173	-1
ENSG00000077327	-5.22838	0.0266748	-0.630133	-15.6331	3.79e-13	4.21e-12	20.0084	9576	SPAG6	sperm associated antigen 6 [Source:HGNC Symbol;Acc:HGNC:11215]	10	22345445	22454224	1
ENSG00000173262	-5.22807	0.0266805	-1.24987	-13.6473	5.31e-12	4.56e-11	17.5231	144195	SLC2A14	solute carrier family 2 member 14 [Source:HGNC Symbol;Acc:HGNC:18301]	12	7812512	7891148	-1
ENSG00000198203	-5.21971	0.0268355	-0.477294	-18.3959	1.49e-14	2.34e-13	22.9496	6819	SULT1C2	sulfotransferase family 1C member 2 [Source:HGNC Symbol;Acc:HGNC:11456]	2	108288639	108309915	1
ENSG00000145506	-5.21852	0.0268577	-0.230531	-17.2367	5.48e-14	7.47e-13	21.7907	85409	NKD2	naked cuticle homolog 2 [Source:HGNC Symbol;Acc:HGNC:17046]	5	1008829	1038943	1
ENSG00000165323	-5.21306	0.0269595	4.66477	-35.1895	2.34e-20	2.02e-18	36.7851	120114	FAT3	FAT atypical cadherin 3 [Source:HGNC Symbol;Acc:HGNC:23112]	11	92352096	92896470	1
ENSG00000138061	-5.20415	0.0271266	5.431	-36.8383	8.94e-21	9.38e-19	37.7755	1545	CYP1B1	cytochrome P450 family 1 subfamily B member 1 [Source:HGNC Symbol;Acc:HGNC:2597]	2	38066973	38109902	-1
ENSG00000186867	-5.19856	0.0272319	-0.22778	-13.4456	7.07e-12	5.9e-11	17.2748	84109	QRFPR	pyroglutamylated RFamide peptide receptor [Source:HGNC Symbol;Acc:HGNC:15565]	4	121329312	121381059	-1
ENSG00000148516	-5.19499	0.0272993	4.01952	-34.9718	2.66e-20	2.28e-18	36.5497	6935	ZEB1	zinc finger E-box binding homeobox 1 [Source:HGNC Symbol;Acc:HGNC:11642]	10	31318495	31529814	1
ENSG00000113504	-5.19052	0.0273841	2.00943	-26.4986	8.61e-18	3.48e-16	30.4571	10723	SLC12A7	solute carrier family 12 member 7 [Source:HGNC Symbol;Acc:HGNC:10915]	5	1050376	1112035	-1
ENSG00000266524	-5.17229	0.0277323	2.89371	-19.6325	4.01e-15	7.29e-14	24.7952	2662	GDF10	growth differentiation factor 10 [Source:HGNC Symbol;Acc:HGNC:4215]	10	47300386	47313547	1
ENSG00000232973	-5.15785	0.0280113	2.52998	-24.0645	6.29e-17	1.93e-15	28.7871	285154	CYP1B1-AS1	CYP1B1 antisense RNA 1 [Source:HGNC Symbol;Acc:HGNC:28543]	2	38073447	38231651	1
ENSG00000162998	-5.15775	0.0280131	3.21592	-30.606	4.32e-19	2.62e-17	33.6884	2487	FRZB	frizzled-related protein [Source:HGNC Symbol;Acc:HGNC:3959]	2	182833275	182867162	-1
ENSG00000163508	-5.14257	0.0283095	-1.44186	-10.2752	1.04e-09	5.4e-09	12.4549	8320	EOMES	eomesodermin [Source:HGNC Symbol;Acc:HGNC:3372]	3	27715949	27722711	-1
ENSG00000138944	-5.13356	0.0284868	0.441364	-19.4408	4.89e-15	8.74e-14	24.0778	85352	KIAA1644	KIAA1644 [Source:HGNC Symbol;Acc:HGNC:29335]	22	44243667	44312851	-1
ENSG00000111087	-5.13331	0.0284917	-1.04882	-12.7265	2.01e-11	1.52e-10	16.2638	2735	GLI1	GLI family zinc finger 1 [Source:HGNC Symbol;Acc:HGNC:4317]	12	57460135	57472262	1
ENSG00000125378	-5.13135	0.0285305	0.719738	-15.675	3.59e-13	4.02e-12	20.198	652	BMP4	bone morphogenetic protein 4 [Source:HGNC Symbol;Acc:HGNC:1071]	14	53949736	53958761	-1
ENSG00000227712	-5.10908	0.0289744	-1.72532	-14.0731	2.94e-12	2.68e-11	18.0596		RP11-418J17.3		1	119260265	119327303	-1
ENSG00000265489	-5.08799	0.029401	-1.25142	-14.116	2.77e-12	2.54e-11	18.1327	100128006	RP11-1090M7.1		17	12760140	12790242	-1
ENSG00000228824	-5.08005	0.0295633	-1.40509	-11.4544	1.44e-10	8.94e-10	14.3688	642345	MIR4500HG	MIR4500 host gene [Source:HGNC Symbol;Acc:HGNC:42773]	13	87427214	87671259	-1
ENSG00000120885	-5.0566	0.0300476	2.81419	-20.3203	2e-15	3.95e-14	25.4835	1191 102465508	CLU	clusterin [Source:HGNC Symbol;Acc:HGNC:2095]	8	27596917	27615031	-1
ENSG00000050030	-5.04589	0.0302716	1.61711	-26.9448	6.09e-18	2.54e-16	30.6122	340533	KIAA2022	KIAA2022 [Source:HGNC Symbol;Acc:HGNC:29433]	X	74732849	74925485	-1
ENSG00000170989	-5.04535	0.0302829	2.11637	-25.9453	1.33e-17	5.07e-16	30.1324	1901	S1PR1	sphingosine-1-phosphate receptor 1 [Source:HGNC Symbol;Acc:HGNC:3165]	1	101236888	101241518	1
ENSG00000248265	-5.01743	0.0308747	2.30551	-25.9891	1.29e-17	4.91e-16	30.2372	440101	FLJ12825	uncharacterized LOC440101 [Source:EntrezGene;Acc:440101]	12	54058254	54122234	1
ENSG00000236886	-5.00644	0.0311109	-0.543778	-10.0629	1.5e-09	7.61e-09	12.0938		AC007563.5		2	216694464	216994079	1
ENSG00000169946	-4.99992	0.0312518	1.04055	-21.843	4.58e-16	1.1e-14	26.4858	23414	ZFPM2	zinc finger protein, FOG family member 2 [Source:HGNC Symbol;Acc:HGNC:16700]	8	104590733	105804532	1
ENSG00000115461	-4.98622	0.0315498	4.17912	-8.5179	2.66e-08	1.05e-07	8.60053	3488	IGFBP5	insulin like growth factor binding protein 5 [Source:HGNC Symbol;Acc:HGNC:5474]	2	216672105	216695525	-1
ENSG00000172159	-4.95352	0.0322731	3.12078	-38.247	4.07e-21	4.79e-19	37.9765	257019	FRMD3	FERM domain containing 3 [Source:HGNC Symbol;Acc:HGNC:24125]	9	83242990	83538546	-1
ENSG00000213931	-4.94855	0.0323847	-0.194035	-13.5735	5.89e-12	5e-11	17.4457	3046	HBE1	hemoglobin subunit epsilon 1 [Source:HGNC Symbol;Acc:HGNC:4830]	11	5268345	5505617	-1
ENSG00000112902	-4.94262	0.032518	4.09761	-36.2839	1.23e-20	1.23e-18	37.3374	9037	SEMA5A	semaphorin 5A [Source:HGNC Symbol;Acc:HGNC:10736]	5	9035026	9546075	-1
ENSG00000006283	-4.92392	0.0329421	-0.56018	-12.1458	4.85e-11	3.38e-10	15.4281	8913	CACNA1G	calcium voltage-gated channel subunit alpha1 G [Source:HGNC Symbol;Acc:HGNC:1394]	17	50561068	50627474	1
ENSG00000111913	-4.91533	0.033139	-1.17243	-8.65711	2.03e-08	8.16e-08	9.53907	9750	FAM65B	family with sequence similarity 65 member B [Source:HGNC Symbol;Acc:HGNC:13872]	6	24804282	24936052	-1
ENSG00000165061	-4.91293	0.033194	0.0117947	-16.2885	1.68e-13	2.04e-12	20.7754	79698	ZMAT4	zinc finger matrin-type 4 [Source:HGNC Symbol;Acc:HGNC:25844]	8	40530590	40897833	-1
ENSG00000261189	-4.91026	0.0332557	-0.253927	-16.5594	1.21e-13	1.54e-12	21.0601		RP3-512B11.3		6	7540451	7541338	-1
ENSG00000196569	-4.89539	0.0336001	4.47006	-52.145	5.92e-24	1.78e-21	44.6388	3908	LAMA2	laminin subunit alpha 2 [Source:HGNC Symbol;Acc:HGNC:6482]	6	128883141	129516569	1
ENSG00000128849	-4.89023	0.0337205	2.46685	-26.39	9.38e-18	3.75e-16	30.6067	84952	CGNL1	cingulin like 1 [Source:HGNC Symbol;Acc:HGNC:25931]	15	57375967	57550727	1
ENSG00000145536	-4.88798	0.0337732	-0.960945	-14.2216	2.4e-12	2.23e-11	18.2745	170690	ADAMTS16	ADAM metallopeptidase with thrombospondin type 1 motif 16 [Source:HGNC Symbol;Acc:HGNC:17108]	5	5140330	5320304	1
ENSG00000163623	-4.88726	0.03379	-0.164167	-17.3986	4.54e-14	6.35e-13	21.9563	4825	NKX6-1	NK6 homeobox 1 [Source:HGNC Symbol;Acc:HGNC:7839]	4	84491987	84498450	-1
ENSG00000026508	-4.87082	0.0341772	0.463834	-16.3167	1.63e-13	2e-12	20.9161	960	CD44	CD44 molecule (Indian blood group) [Source:HGNC Symbol;Acc:HGNC:1681]	11	35138870	35232402	1
ENSG00000128045	-4.86703	0.0342671	3.58421	-14.5078	1.63e-12	1.58e-11	18.6727	65997	RASL11B	RAS like family 11 member B [Source:HGNC Symbol;Acc:HGNC:23804]	4	52862290	52866835	1
ENSG00000231107	-4.85899	0.0344587	-1.22298	-16.5068	1.29e-13	1.63e-12	20.9574	101927873	LINC01508	long intergenic non-protein coding RNA 1508 [Source:HGNC Symbol;Acc:HGNC:51190]	9	90300902	90433505	-1
ENSG00000019505	-4.85018	0.0346698	0.322144	-18.5208	1.3e-14	2.08e-13	23.2063	57586	SYT13	synaptotagmin 13 [Source:HGNC Symbol;Acc:HGNC:14962]	11	45240301	45286319	-1
ENSG00000182256	-4.84287	0.0348459	0.770923	-21.5794	5.87e-16	1.36e-14	26.1795	2567	GABRG3	gamma-aminobutyric acid type A receptor gamma3 subunit [Source:HGNC Symbol;Acc:HGNC:4088]	15	26971282	27541991	1
ENSG00000134343	-4.83761	0.0349732	0.985224	-17.9545	2.42e-14	3.64e-13	22.8342	63982	ANO3	anoctamin 3 [Source:HGNC Symbol;Acc:HGNC:14004]	11	26309599	26663288	1
ENSG00000147257	-4.82561	0.0352651	5.1823	-64.0301	7.67e-26	5.59e-23	48.9739	2719	GPC3	glypican 3 [Source:HGNC Symbol;Acc:HGNC:4451]	X	133535745	133985895	-1
ENSG00000163898	-4.81525	0.0355195	0.0909719	-11.4974	1.34e-10	8.4e-10	14.4539	200879	LIPH	lipase H [Source:HGNC Symbol;Acc:HGNC:18483]	3	185506262	185552613	-1
ENSG00000250619	-4.8096	0.0356587	0.640194	-14.3944	1.9e-12	1.81e-11	18.6213		CTD-2215L10.1		5	9001774	9045940	1
ENSG00000188042	-4.77749	0.0364613	3.81718	-35.8934	1.54e-20	1.44e-18	37.0727	10123	ARL4C	ADP ribosylation factor like GTPase 4C [Source:HGNC Symbol;Acc:HGNC:698]	2	234493041	234497053	-1
ENSG00000163520	-4.74709	0.0372379	4.07654	-35.1671	2.37e-20	2.04e-18	36.7231	2199	FBLN2	fibulin 2 [Source:HGNC Symbol;Acc:HGNC:3601]	3	13549131	13638422	1
ENSG00000175928	-4.74195	0.0373707	3.40807	-24.3851	4.79e-17	1.54e-15	29.2013	57633	LRRN1	leucine rich repeat neuronal 1 [Source:HGNC Symbol;Acc:HGNC:20980]	3	3799437	3847703	1
ENSG00000128652	-4.74139	0.0373852	3.30706	-33.2926	7.45e-20	5.48e-18	35.4366	3232	HOXD3	homeobox D3 [Source:HGNC Symbol;Acc:HGNC:5137]	2	176136612	176173102	1
ENSG00000250641	-4.73943	0.0374361	-1.04245	-10.5143	6.86e-10	3.69e-09	12.8581		XXbac-BPG32J3.19		6	31706904	31717918	1
ENSG00000165633	-4.72802	0.0377332	1.27524	-16.2808	1.7e-13	2.06e-12	21.0266	196740	VSTM4	V-set and transmembrane domain containing 4 [Source:HGNC Symbol;Acc:HGNC:26470]	10	49014245	49115509	-1
ENSG00000151136	-4.72689	0.0377628	-1.12501	-12.8721	1.62e-11	1.25e-10	16.4632	121551	BTBD11	BTB domain containing 11 [Source:HGNC Symbol;Acc:HGNC:23844]	12	107318413	107659642	1
ENSG00000092051	-4.70726	0.03828	1.45	-21.3441	7.34e-16	1.65e-14	26.2468	84502	JPH4	junctophilin 4 [Source:HGNC Symbol;Acc:HGNC:20156]	14	23568035	23578800	-1
ENSG00000139629	-4.70482	0.0383448	-0.608485	-12.2453	4.16e-11	2.93e-10	15.5731	11226	GALNT6	polypeptide N-acetylgalactosaminyltransferase 6 [Source:HGNC Symbol;Acc:HGNC:4128]	12	51351247	51392867	-1
ENSG00000120738	-4.70459	0.0383511	1.19693	-10.9497	3.29e-10	1.89e-09	13.5621	1958	EGR1	early growth response 1 [Source:HGNC Symbol;Acc:HGNC:3238]	5	138465490	138469315	1
ENSG00000126733	-4.70144	0.0384349	2.85124	-32.0968	1.6e-19	1.09e-17	34.5666	117154	DACH2	dachshund family transcription factor 2 [Source:HGNC Symbol;Acc:HGNC:16814]	X	86148458	86832604	1
ENSG00000278500	-4.67829	0.0390567	3.94658	-39.5745	1.99e-21	2.55e-19	39.0684	3233	AC009336.19		2	176151085	176173097	1
ENSG00000145864	-4.67468	0.0391544	0.0673876	-14.8033	1.1e-12	1.1e-11	19.0544	2561	GABRB2	gamma-aminobutyric acid type A receptor beta2 subunit [Source:HGNC Symbol;Acc:HGNC:4082]	5	161288429	161549044	-1
ENSG00000162981	-4.67204	0.0392262	1.74855	-23.3267	1.19e-16	3.38e-15	28.0402	151354	FAM84A	family with sequence similarity 84 member A [Source:HGNC Symbol;Acc:HGNC:20743]	2	14632686	14650814	1
ENSG00000166250	-4.66819	0.039331	5.09379	-51.0914	9.11e-24	2.58e-21	44.5098	79827	CLMP	CXADR like membrane protein [Source:HGNC Symbol;Acc:HGNC:24039]	11	123069865	123195281	-1
ENSG00000148204	-4.64829	0.0398772	2.67936	-21.6142	5.68e-16	1.32e-14	26.7227	286204	CRB2	crumbs 2, cell polarity complex component [Source:HGNC Symbol;Acc:HGNC:18688]	9	123356170	123380324	1
ENSG00000134107	-4.64642	0.0399291	0.346175	-14.1389	2.69e-12	2.47e-11	18.2591	8553	BHLHE40	basic helix-loop-helix family member e40 [Source:HGNC Symbol;Acc:HGNC:1046]	3	4979116	4985323	1
ENSG00000154639	-4.63644	0.0402061	4.33161	-48.9333	2.27e-23	5.73e-21	43.403	1525	CXADR	coxsackie virus and adenovirus receptor [Source:HGNC Symbol;Acc:HGNC:2559]	21	17512382	17593579	1
ENSG00000170382	-4.6095	0.0409641	-1.27933	-12.474	2.94e-11	2.13e-10	15.8925	10446	LRRN2	leucine rich repeat neuronal 2 [Source:HGNC Symbol;Acc:HGNC:16914]	1	204617170	204685733	-1
ENSG00000188522	-4.60521	0.041086	-0.777578	-11.5931	1.15e-10	7.31e-10	14.5888	644815	FAM83G	family with sequence similarity 83 member G [Source:HGNC Symbol;Acc:HGNC:32554]	17	18968789	19004804	-1
ENSG00000137142	-4.59376	0.0414133	1.86357	-24.3922	4.76e-17	1.53e-15	28.945	347252	IGFBPL1	insulin like growth factor binding protein like 1 [Source:HGNC Symbol;Acc:HGNC:20081]	9	38408994	38424447	-1
ENSG00000183876	-4.59202	0.0414634	0.442174	-16.3348	1.59e-13	1.96e-12	20.9606	340075	ARSI	arylsulfatase family member I [Source:HGNC Symbol;Acc:HGNC:32521]	5	150296343	150339307	-1
ENSG00000198435	-4.59081	0.041498	-0.900542	-10.0349	1.58e-09	7.96e-09	12.0448	441478	NRARP	NOTCH-regulated ankyrin repeat protein [Source:HGNC Symbol;Acc:HGNC:33843]	9	137300482	137302251	-1
ENSG00000177706	-4.5887	0.0415587	0.426822	-15.8708	2.81e-13	3.24e-12	20.4218	56975	FAM20C	family with sequence similarity 20 member C [Source:HGNC Symbol;Acc:HGNC:22140]	7	192969	260745	1
ENSG00000196557	-4.57591	0.0419289	-1.11181	-11.9198	6.88e-11	4.61e-10	15.0806	8912	CACNA1H	calcium voltage-gated channel subunit alpha1 H [Source:HGNC Symbol;Acc:HGNC:1395]	16	1153121	1221772	1
ENSG00000198797	-4.57474	0.0419629	0.600928	-8.58047	2.35e-08	9.36e-08	9.33368	57795	BRINP2	BMP/retinoic acid inducible neural specific 2 [Source:HGNC Symbol;Acc:HGNC:13746]	1	177171497	177282422	1
ENSG00000172752	-4.57193	0.0420448	-0.884239	-10.0552	1.52e-09	7.7e-09	12.0798	256076	COL6A5	collagen type VI alpha 5 chain [Source:HGNC Symbol;Acc:HGNC:26674]	3	130345516	130484844	1
ENSG00000176842	-4.56544	0.0422343	-0.250588	-10.4168	8.12e-10	4.3e-09	12.6976	10265	IRX5	iroquois homeobox 5 [Source:HGNC Symbol;Acc:HGNC:14361]	16	54930862	54934485	1
ENSG00000137441	-4.55995	0.0423954	-0.477004	-15.3966	5.11e-13	5.53e-12	19.7266	83888	FGFBP2	fibroblast growth factor binding protein 2 [Source:HGNC Symbol;Acc:HGNC:29451]	4	15960243	15969309	-1
ENSG00000077264	-4.558	0.0424526	1.44801	-21.632	5.59e-16	1.31e-14	26.5238	5063	PAK3	p21 (RAC1) activated kinase 3 [Source:HGNC Symbol;Acc:HGNC:8592]	X	110944285	111227361	1
ENSG00000090339	-4.5565	0.0424968	-0.251357	-13.0819	1.19e-11	9.49e-11	16.7728	3383	ICAM1	intercellular adhesion molecule 1 [Source:HGNC Symbol;Acc:HGNC:5344]	19	10270835	10286615	1
ENSG00000185112	-4.55538	0.0425299	0.393904	-17.9307	2.49e-14	3.73e-13	22.6841	131583	FAM43A	family with sequence similarity 43 member A [Source:HGNC Symbol;Acc:HGNC:26888]	3	194686544	194689037	1
ENSG00000100433	-4.53265	0.0432053	-0.908406	-13.6711	5.14e-12	4.43e-11	17.5557	54207	KCNK10	potassium two pore domain channel subfamily K member 10 [Source:HGNC Symbol;Acc:HGNC:6273]	14	88180103	88326907	-1
ENSG00000157064	-4.52926	0.0433069	0.27653	-17.6928	3.25e-14	4.72e-13	22.4038	23057	NMNAT2	nicotinamide nucleotide adenylyltransferase 2 [Source:HGNC Symbol;Acc:HGNC:16789]	1	183248237	183418602	-1
ENSG00000162989	-4.52004	0.0435845	-1.49765	-11.5303	1.28e-10	8e-10	14.4807	3760	KCNJ3	potassium voltage-gated channel subfamily J member 3 [Source:HGNC Symbol;Acc:HGNC:6264]	2	154698299	154858352	1
ENSG00000250786	-4.51764	0.0436571	0.209898	-17.5234	3.94e-14	5.58e-13	22.2065		SNHG18	small nucleolar RNA host gene 18 [Source:HGNC Symbol;Acc:HGNC:49007]	5	9546200	9550609	1
ENSG00000168702	-4.51026	0.0438811	1.49947	-23.9346	7.03e-17	2.12e-15	28.4694	53353	LRP1B	LDL receptor related protein 1B [Source:HGNC Symbol;Acc:HGNC:6693]	2	140231423	142131701	-1
ENSG00000163364	-4.50449	0.0440569	2.38291	-27.7772	3.24e-18	1.46e-16	31.633		LINC01116	long intergenic non-protein coding RNA 1116 [Source:HGNC Symbol;Acc:HGNC:49259]	2	176629589	176637931	-1
ENSG00000047617	-4.50104	0.0441622	1.94313	-25.1369	2.56e-17	9.12e-16	29.5616	57101	ANO2	anoctamin 2 [Source:HGNC Symbol;Acc:HGNC:1183]	12	5531869	5946232	-1
ENSG00000008118	-4.48776	0.0445708	-1.32767	-13.2126	9.87e-12	7.95e-11	16.9254	57172	CAMK1G	calcium/calmodulin dependent protein kinase IG [Source:HGNC Symbol;Acc:HGNC:14585]	1	209583717	209613938	1
ENSG00000128285	-4.47207	0.045058	-1.55757	-12.0443	5.67e-11	3.88e-10	15.2562	2847	MCHR1	melanin concentrating hormone receptor 1 [Source:HGNC Symbol;Acc:HGNC:4479]	22	40678750	40682814	1
ENSG00000168671	-4.46308	0.0453396	-0.817341	-12.2369	4.21e-11	2.96e-10	15.5557	167127	UGT3A2	UDP glycosyltransferase family 3 member A2 [Source:HGNC Symbol;Acc:HGNC:27266]	5	36035017	36071358	-1
ENSG00000254687	-4.45341	0.0456446	0.19881	-14.0206	3.16e-12	2.85e-11	18.0949		RP11-162D9.3		8	53177571	53242683	1
ENSG00000233138	-4.45199	0.0456897	-0.826988	-15.8763	2.79e-13	3.22e-12	20.2663		RP1-67K17.3		6	142748443	142753759	1
ENSG00000180287	-4.44988	0.0457566	1.94127	-9.02334	1e-08	4.29e-08	10.0105	200150	PLD5	phospholipase D family member 5 [Source:HGNC Symbol;Acc:HGNC:26879]	1	242082986	242524696	-1
ENSG00000169836	-4.44827	0.0458077	0.038425	-16.9162	7.96e-14	1.05e-12	21.5185	6870	TACR3	tachykinin receptor 3 [Source:HGNC Symbol;Acc:HGNC:11528]	4	103586031	103719816	-1
ENSG00000101144	-4.44744	0.0458339	3.70671	-40.0553	1.54e-21	2.11e-19	39.2658	655	BMP7	bone morphogenetic protein 7 [Source:HGNC Symbol;Acc:HGNC:1074]	20	57168748	57266629	-1
ENSG00000139269	-4.43313	0.0462907	-0.867603	-11.8371	7.84e-11	5.18e-10	14.9589	83729	INHBE	inhibin beta E subunit [Source:HGNC Symbol;Acc:HGNC:24029]	12	57452323	57459280	1
ENSG00000160712	-4.42865	0.0464348	-0.190349	-8.99126	1.07e-08	4.54e-08	10.1655	3570	IL6R	interleukin 6 receptor [Source:HGNC Symbol;Acc:HGNC:6019]	1	154405193	154469450	1
ENSG00000204335	-4.42074	0.0466899	3.58191	-30.089	6.16e-19	3.56e-17	33.5074	389058	SP5	Sp5 transcription factor [Source:HGNC Symbol;Acc:HGNC:14529]	2	170715351	170718078	1
ENSG00000085741	-4.39567	0.0475086	-0.629296	-13.67	5.14e-12	4.44e-11	17.5601	7481	WNT11	Wnt family member 11 [Source:HGNC Symbol;Acc:HGNC:12776]	11	76186325	76210736	-1
ENSG00000011677	-4.39564	0.0475095	-0.0253473	-14.1375	2.69e-12	2.48e-11	18.2161	2556	GABRA3	gamma-aminobutyric acid type A receptor alpha3 subunit [Source:HGNC Symbol;Acc:HGNC:4077]	X	152166234	152451358	-1
ENSG00000166073	-4.39437	0.0475514	2.58068	-20.7538	1.3e-15	2.7e-14	25.9109	11245	GPR176	G protein-coupled receptor 176 [Source:HGNC Symbol;Acc:HGNC:32370]	15	39799032	39920892	-1
ENSG00000182871	-4.38561	0.0478411	4.88834	-48.272	3.02e-23	7.44e-21	43.3482	80781	COL18A1	collagen type XVIII alpha 1 chain [Source:HGNC Symbol;Acc:HGNC:2195]	21	45405137	45513720	1
ENSG00000112175	-4.3825	0.0479441	3.52753	-39.6045	1.95e-21	2.52e-19	38.9889	653	BMP5	bone morphogenetic protein 5 [Source:HGNC Symbol;Acc:HGNC:1072]	6	55753645	55875564	-1
ENSG00000256040	-4.37929	0.0480509	1.28284	-11.1833	2.24e-10	1.33e-09	13.9313	493913	PAPPA-AS1	PAPPA antisense RNA 1 [Source:HGNC Symbol;Acc:HGNC:35152]	9	116398157	116400606	-1
ENSG00000112936	-4.37911	0.0480569	1.06017	-21.366	7.19e-16	1.63e-14	26.1937	730	C7	complement component 7 [Source:HGNC Symbol;Acc:HGNC:1346]	5	40909252	40982939	1
ENSG00000165238	-4.37865	0.0480725	-0.143002	-15.3925	5.13e-13	5.55e-12	19.7518	65268	WNK2	WNK lysine deficient protein kinase 2 [Source:HGNC Symbol;Acc:HGNC:14542]	9	93184916	93320572	1
ENSG00000108691	-4.37415	0.0482227	0.872473	-10.1261	1.35e-09	6.86e-09	12.1657	6347	CCL2	C-C motif chemokine ligand 2 [Source:HGNC Symbol;Acc:HGNC:10618]	17	34255218	34257203	1
ENSG00000166415	-4.36027	0.0486887	-0.173957	-11.7558	8.91e-11	5.79e-10	14.8485	256764	WDR72	WD repeat domain 72 [Source:HGNC Symbol;Acc:HGNC:26790]	15	53513741	53762878	-1
ENSG00000078114	-4.36024	0.0486897	3.78661	-36.7256	9.54e-21	9.84e-19	37.5789	10529	NEBL	nebulette [Source:HGNC Symbol;Acc:HGNC:16932]	10	20779973	21174187	-1
ENSG00000144857	-4.35442	0.0488865	2.72629	-30.3175	5.26e-19	3.13e-17	33.4757	91653	BOC	BOC cell adhesion associated, oncogene regulated [Source:HGNC Symbol;Acc:HGNC:17173]	3	113211003	113287459	1
ENSG00000197991	-4.34906	0.0490685	-1.50428	-13.959	3.44e-12	3.08e-11	17.907	64881	RP11-310K10.1		13	61409858	61427849	-1
ENSG00000280165	-4.34042	0.0493631	-1.50928	-13.8732	3.87e-12	3.43e-11	17.7954	64881	PCDH20	protocadherin 20 [Source:HGNC Symbol;Acc:HGNC:14257]	13	61409685	61415522	-1
ENSG00000141639	-4.32679	0.0498317	4.64604	-43.7699	2.38e-22	4.15e-20	41.315	5596	MAPK4	mitogen-activated protein kinase 4 [Source:HGNC Symbol;Acc:HGNC:6878]	18	50560078	50731824	1
ENSG00000114251	-4.31925	0.050093	3.72806	-38.139	4.32e-21	5.06e-19	38.324	7474	WNT5A	Wnt family member 5A [Source:HGNC Symbol;Acc:HGNC:12784]	3	55465715	55490539	-1
ENSG00000115738	-4.31425	0.0502669	2.58532	-20.8269	1.21e-15	2.55e-14	25.9835	3398	ID2	inhibitor of DNA binding 2, HLH protein [Source:HGNC Symbol;Acc:HGNC:5361]	2	8678845	8684453	1
ENSG00000164692	-4.29917	0.0507949	4.68574	-43.9399	2.19e-22	3.89e-20	41.4029	1278	COL1A2	collagen type I alpha 2 chain [Source:HGNC Symbol;Acc:HGNC:2198]	7	94394561	94431232	1
ENSG00000177508	-4.2911	0.0510799	0.467297	-13.4246	7.28e-12	6.06e-11	17.326	79191	IRX3	iroquois homeobox 3 [Source:HGNC Symbol;Acc:HGNC:14360]	16	54283304	54286763	-1
ENSG00000145358	-4.26456	0.0520282	-0.833813	-17.3466	4.82e-14	6.69e-13	21.8551	115265	DDIT4L	DNA damage inducible transcript 4 like [Source:HGNC Symbol;Acc:HGNC:30555]	4	100185870	100190782	-1
ENSG00000077943	-4.25285	0.0524523	0.260214	-13.9476	3.49e-12	3.13e-11	18.0185	8516	ITGA8	integrin subunit alpha 8 [Source:HGNC Symbol;Acc:HGNC:6144]	10	15513949	15720125	-1
ENSG00000005102	-4.24414	0.0527699	1.78484	-21.5258	6.18e-16	1.42e-14	26.5453	4222	MEOX1	mesenchyme homeobox 1 [Source:HGNC Symbol;Acc:HGNC:7013]	17	43640388	43661954	-1
ENSG00000233351	-4.23325	0.0531696	-0.411807	-15.3811	5.21e-13	5.61e-12	19.708		RP1-69D17.3		6	129479615	129481410	-1
ENSG00000283327	-4.22763	0.0533772	0.690647	-17.9827	2.35e-14	3.54e-13	22.8603	102465506	MIR6841	microRNA 6841 [Source:HGNC Symbol;Acc:HGNC:50070]	8	24953796	24953867	-1
ENSG00000261238	-4.22748	0.0533828	-1.21816	-11.5142	1.31e-10	8.2e-10	14.4584		AC009166.5		16	51149239	51149819	1
ENSG00000184486	-4.21893	0.0537003	4.38967	-28.6072	1.76e-18	8.67e-17	32.4943	5454	POU3F2	POU class 3 homeobox 2 [Source:HGNC Symbol;Acc:HGNC:9215]	6	98834592	98839470	1
ENSG00000100625	-4.21538	0.0538323	2.50608	-26.6548	7.63e-18	3.11e-16	30.902	51804	SIX4	SIX homeobox 4 [Source:HGNC Symbol;Acc:HGNC:10890]	14	60709528	60724348	-1
ENSG00000163053	-4.21391	0.0538872	0.959052	-16.3595	1.55e-13	1.91e-12	21.1095	151473	SLC16A14	solute carrier family 16 member 14 [Source:HGNC Symbol;Acc:HGNC:26417]	2	230034974	230068999	-1
ENSG00000204860	-4.21373	0.0538941	-1.16187	-14.313	2.12e-12	2e-11	18.3715		FAM201A	family with sequence similarity 201 member A [Source:HGNC Symbol;Acc:HGNC:27239]	9	38620474	38624990	1
ENSG00000176771	-4.21312	0.0539168	2.9951	-14.8181	1.08e-12	1.08e-11	19.1326	344148	NCKAP5	NCK associated protein 5 [Source:HGNC Symbol;Acc:HGNC:29847]	2	132671799	133568463	-1
ENSG00000244586	-4.19955	0.0544265	-0.657447	-10.2829	1.02e-09	5.33e-09	12.4695		WNT5A-AS1	WNT5A antisense RNA 1 [Source:HGNC Symbol;Acc:HGNC:40616]	3	55487699	55488308	1
ENSG00000258545	-4.19477	0.054607	-0.434982	-12.7833	1.85e-11	1.4e-10	16.3491	101928969	RHOXF1-AS1	RHOXF1 antisense RNA 1 [Source:HGNC Symbol;Acc:HGNC:51582]	X	120036236	120146854	1
ENSG00000130054	-4.19352	0.0546543	-0.887342	-11.0573	2.75e-10	1.61e-09	13.7443	27112	FAM155B	family with sequence similarity 155 member B [Source:HGNC Symbol;Acc:HGNC:30701]	X	69505241	69532508	1
ENSG00000140067	-4.18983	0.0547944	-0.616	-9.81902	2.32e-09	1.12e-08	11.6687	90050	FAM181A	family with sequence similarity 181 member A [Source:HGNC Symbol;Acc:HGNC:20491]	14	93918894	93929608	1
ENSG00000237732	-4.18963	0.054802	-1.31717	-11.1367	2.42e-10	1.43e-09	13.8656	440934	AC010980.2		2	222318275	222352989	1
ENSG00000224419	-4.17205	0.0554738	-1.36678	-11.5911	1.16e-10	7.33e-10	14.5736		KRT18P27	keratin 18 pseudogene 27 [Source:HGNC Symbol;Acc:HGNC:33396]	13	90230384	90231682	1
ENSG00000283382	-4.17093	0.055517	1.4368	-17.0052	7.17e-14	9.52e-13	21.9071	11245	AC023908.1		15	39801132	39829117	-1
ENSG00000010610	-4.16538	0.055731	2.41594	-21.0798	9.46e-16	2.07e-14	26.2199	920	CD4	CD4 molecule [Source:HGNC Symbol;Acc:HGNC:1678]	12	6786858	6820808	1
ENSG00000213694	-4.15957	0.0559559	4.04873	-32.8114	1.01e-19	7.23e-18	35.3397	1903	S1PR3	sphingosine-1-phosphate receptor 3 [Source:HGNC Symbol;Acc:HGNC:3167]	9	88991447	89005010	1
ENSG00000146648	-4.1571	0.0560515	1.64246	-18.4608	1.39e-14	2.2e-13	23.5277	1956	EGFR	epidermal growth factor receptor [Source:HGNC Symbol;Acc:HGNC:3236]	7	55019021	55211628	1
ENSG00000104267	-4.15128	0.0562783	0.0260319	-11.8629	7.53e-11	4.99e-10	15.0295	760	CA2	carbonic anhydrase 2 [Source:HGNC Symbol;Acc:HGNC:1373]	8	85463852	85481493	1
ENSG00000164976	-4.14877	0.0563762	1.66726	-22.6672	2.15e-16	5.68e-15	27.5361	57462	KIAA1161	KIAA1161 [Source:HGNC Symbol;Acc:HGNC:19918]	9	34366670	34376853	-1
ENSG00000122861	-4.14855	0.0563848	3.39044	-19.1793	6.43e-15	1.12e-13	24.2837	5328	PLAU	plasminogen activator, urokinase [Source:HGNC Symbol;Acc:HGNC:9052]	10	73909177	73917497	1
ENSG00000198771	-4.14747	0.0564271	0.441847	-16.0083	2.37e-13	2.78e-12	20.6252	92241	RCSD1	RCSD domain containing 1 [Source:HGNC Symbol;Acc:HGNC:28310]	1	167630093	167706249	1
ENSG00000153162	-4.13307	0.0569932	1.73256	-20.3191	2e-15	3.95e-14	25.4189	654	BMP6	bone morphogenetic protein 6 [Source:HGNC Symbol;Acc:HGNC:1073]	6	7726797	7881422	1
ENSG00000277586	-4.12157	0.0574493	5.56788	-55.6188	1.51e-24	6.11e-22	46.3849	4747	NEFL	neurofilament, light polypeptide [Source:HGNC Symbol;Acc:HGNC:7739]	8	24950955	24957110	-1
ENSG00000069122	-4.11319	0.057784	-0.259249	-9.0931	8.81e-09	3.8e-08	10.3544	221395	ADGRF5	adhesion G protein-coupled receptor F5 [Source:HGNC Symbol;Acc:HGNC:19030]	6	46852512	46954943	-1
ENSG00000082556	-4.10549	0.0580931	0.965316	-14.797	1.11e-12	1.11e-11	19.1983	4986	OPRK1	opioid receptor kappa 1 [Source:HGNC Symbol;Acc:HGNC:8154]	8	53225716	53251697	-1
ENSG00000144218	-4.10182	0.0582411	2.30508	-28.1977	2.37e-18	1.12e-16	31.9649	3899	AFF3	AF4/FMR2 family member 3 [Source:HGNC Symbol;Acc:HGNC:6473]	2	99545419	100142739	-1
ENSG00000154856	-4.09733	0.0584228	6.72995	-74.5717	3.03e-27	3.88e-24	52.5749	147495	APCDD1	APC down-regulated 1 [Source:HGNC Symbol;Acc:HGNC:15718]	18	10454628	10489948	1
ENSG00000169851	-4.09707	0.0584331	5.93736	-57.6907	6.97e-25	3.23e-22	47.1861	5099	PCDH7	protocadherin 7 [Source:HGNC Symbol;Acc:HGNC:8659]	4	30720415	31146805	1
ENSG00000162878	-4.08497	0.0589253	5.99712	-39.911	1.66e-21	2.21e-19	39.4249	91461	PKDCC	protein kinase domain containing, cytoplasmic [Source:HGNC Symbol;Acc:HGNC:25123]	2	42048020	42058528	1
ENSG00000115085	-4.08068	0.0591006	-0.756307	-9.29668	6.02e-09	2.69e-08	10.7337	7535	ZAP70	zeta chain of T cell receptor associated protein kinase 70 [Source:HGNC Symbol;Acc:HGNC:12858]	2	97713560	97739862	1
ENSG00000145911	-4.07729	0.0592398	2.40717	-25.4568	1.97e-17	7.24e-16	29.9845	23138	N4BP3	NEDD4 binding protein 3 [Source:HGNC Symbol;Acc:HGNC:29852]	5	178113443	178126087	1
ENSG00000156925	-4.06971	0.0595518	4.18932	-34.0835	4.56e-20	3.62e-18	36.1368	7547	ZIC3	Zic family member 3 [Source:HGNC Symbol;Acc:HGNC:12874]	X	137566142	137577691	1
ENSG00000196482	-4.06872	0.0595926	0.334703	-10.6731	5.24e-10	2.89e-09	13.1262	2104	ESRRG	estrogen related receptor gamma [Source:HGNC Symbol;Acc:HGNC:3474]	1	216503246	217137755	-1
ENSG00000153707	-4.06272	0.0598409	5.33327	-64.6437	6.26e-26	4.95e-23	49.3825	5789	PTPRD	protein tyrosine phosphatase, receptor type D [Source:HGNC Symbol;Acc:HGNC:9668]	9	8314246	10612723	-1
ENSG00000213981	-4.05566	0.0601348	-0.329713	-12.3773	3.4e-11	2.43e-10	15.775		AC007277.3		2	170640374	170695374	-1
ENSG00000184611	-4.05351	0.0602245	-0.743411	-8.71054	1.83e-08	7.42e-08	9.6408	90134	KCNH7	potassium voltage-gated channel subfamily H member 7 [Source:HGNC Symbol;Acc:HGNC:18863]	2	162371407	162838730	-1
ENSG00000010818	-4.05005	0.060369	3.95536	-35.6419	1.79e-20	1.61e-18	37.0334	3097	HIVEP2	human immunodeficiency virus type I enhancer binding protein 2 [Source:HGNC Symbol;Acc:HGNC:4921]	6	142751467	142945201	-1
ENSG00000078596	-4.04513	0.0605753	1.98675	-21.1324	9e-16	1.99e-14	26.2323	9452	ITM2A	integral membrane protein 2A [Source:HGNC Symbol;Acc:HGNC:6173]	X	79360384	79367667	-1
ENSG00000108679	-4.04058	0.0607664	1.51927	-17.8582	2.7e-14	3.99e-13	22.8728	3959	LGALS3BP	galectin 3 binding protein [Source:HGNC Symbol;Acc:HGNC:6564]	17	78971238	78980109	-1
ENSG00000107242	-4.03631	0.0609466	0.414946	-10.4916	7.14e-10	3.83e-09	12.8156	8395	PIP5K1B	phosphatidylinositol-4-phosphate 5-kinase type 1 beta [Source:HGNC Symbol;Acc:HGNC:8995]	9	68705414	69009176	1
ENSG00000185924	-4.03568	0.0609734	0.314873	-13.1169	1.13e-11	9.04e-11	16.892	146760	RTN4RL1	reticulon 4 receptor like 1 [Source:HGNC Symbol;Acc:HGNC:21329]	17	1934677	2025345	-1
ENSG00000170166	-4.03567	0.0609736	3.47901	-31.9445	1.77e-19	1.18e-17	34.7349	3233	HOXD4	homeobox D4 [Source:HGNC Symbol;Acc:HGNC:5138]	2	176151222	176153226	1
ENSG00000197565	-4.0342	0.0610359	3.41833	-28.1025	2.55e-18	1.18e-16	32.1179	1288	COL4A6	collagen type IV alpha 6 chain [Source:HGNC Symbol;Acc:HGNC:2208]	X	108155607	108439497	-1
ENSG00000207955	-4.01421	0.0618873	0.0371211	-15.8567	2.86e-13	3.29e-12	20.3786	407003	MIR219A2	microRNA 219a-2 [Source:HGNC Symbol;Acc:HGNC:31598]	9	128392007	128393510	-1
ENSG00000275993	-4.00903	0.0621099	0.0768804	-16.1525	1.99e-13	2.36e-12	20.7288	102724428	CH507-42P11.8	Homo sapiens serine/threonine-protein kinase SIK1 (LOC102724428), mRNA. [Source:RefSeq mRNA;Acc:NM_001320643]	21	6111134	6123739	1
ENSG00000092607	-4.00543	0.0622652	1.98536	-23.8405	7.62e-17	2.26e-15	28.6101	6913	TBX15	T-box 15 [Source:HGNC Symbol;Acc:HGNC:11594]	1	118883046	118989556	-1
ENSG00000102271	-4.00537	0.0622679	2.85676	-34.8484	2.86e-20	2.45e-18	36.3007	56062	KLHL4	kelch like family member 4 [Source:HGNC Symbol;Acc:HGNC:6355]	X	87517749	87670050	1
ENSG00000198053	-4.00458	0.062302	1.9783	-21.3473	7.32e-16	1.65e-14	26.4331	140885	SIRPA	signal regulatory protein alpha [Source:HGNC Symbol;Acc:HGNC:9662]	20	1894167	1940592	1
ENSG00000152377	-4.00284	0.062377	2.71363	-23.562	9.71e-17	2.81e-15	28.4846	6695	SPOCK1	sparc/osteonectin, cwcv and kazal-like domains proteoglycan (testican) 1 [Source:HGNC Symbol;Acc:HGNC:11251]	5	136975298	137598379	-1
ENSG00000106714	-4.00207	0.0624105	2.12244	-21.4224	6.81e-16	1.55e-14	26.5212	79937	CNTNAP3	contactin associated protein-like 3 [Source:HGNC Symbol;Acc:HGNC:13834]	9	39072767	39288315	-1
ENSG00000137331	-4.00159	0.0624314	2.44711	-22.5469	2.4e-16	6.23e-15	27.5759	8870	IER3	immediate early response 3 [Source:HGNC Symbol;Acc:HGNC:5392]	6	30743199	30744554	-1
ENSG00000101938	-4.00101	0.0624564	1.04933	-15.6402	3.75e-13	4.18e-12	20.2677	91851	CHRDL1	chordin like 1 [Source:HGNC Symbol;Acc:HGNC:29861]	X	110673856	110795819	-1
ENSG00000162433	-3.99367	0.0627749	-0.41066	-12.3281	3.67e-11	2.6e-10	15.6978	205	AK4	adenylate kinase 4 [Source:HGNC Symbol;Acc:HGNC:363]	1	65147549	65232145	1
ENSG00000185885	-3.98355	0.0632166	1.63924	-20.3377	1.96e-15	3.91e-14	25.4332	8519	IFITM1	interferon induced transmembrane protein 1 [Source:HGNC Symbol;Acc:HGNC:5412]	11	313506	315272	1
ENSG00000237036	-3.97856	0.0634356	1.30883	-18.1836	1.88e-14	2.9e-13	23.2039		ZEB1-AS1	ZEB1 antisense RNA 1 [Source:HGNC Symbol;Acc:HGNC:42354]	10	31206278	31320447	-1
ENSG00000222047	-3.97726	0.063493	1.65585	-16.4861	1.33e-13	1.67e-12	21.3181	414236	C10orf55	chromosome 10 open reading frame 55 [Source:HGNC Symbol;Acc:HGNC:31008]	10	73909969	73922777	-1
ENSG00000164142	-3.97373	0.0636483	0.572242	-17.5667	3.75e-14	5.33e-13	22.4141	729830	FAM160A1	family with sequence similarity 160 member A1 [Source:HGNC Symbol;Acc:HGNC:34237]	4	151409216	151663632	1
ENSG00000205414	-3.97299	0.0636813	0.629808	-15.0284	8.2e-13	8.44e-12	19.4707		RP11-401P9.6		16	50606076	50613684	-1
ENSG00000116132	-3.96959	0.0638314	1.31357	-18.8142	9.47e-15	1.57e-13	23.8671	5396	PRRX1	paired related homeobox 1 [Source:HGNC Symbol;Acc:HGNC:9142]	1	170662728	170739419	1
ENSG00000198796	-3.965	0.0640347	-0.874203	-10.7561	4.55e-10	2.54e-09	13.256	115701	ALPK2	alpha kinase 2 [Source:HGNC Symbol;Acc:HGNC:20565]	18	58481247	58628957	-1
ENSG00000186998	-3.96242	0.0641492	2.02105	-18.5468	1.26e-14	2.04e-13	23.6522	129080	EMID1	EMI domain containing 1 [Source:HGNC Symbol;Acc:HGNC:18036]	22	29205851	29259597	1
ENSG00000110799	-3.95289	0.0645745	-0.602658	-14.3173	2.11e-12	1.99e-11	18.3945	7450	VWF	von Willebrand factor [Source:HGNC Symbol;Acc:HGNC:12726]	12	5948874	6124770	-1
ENSG00000258376	-3.9455	0.0649061	-0.23096	-11.9953	6.12e-11	4.16e-10	15.2202		RP4-647C14.2		14	73242651	73245979	-1
ENSG00000267034	-3.94063	0.0651259	-1.20873	-10.3956	8.42e-10	4.45e-09	12.6561		RP11-384O8.1		2	222317242	222318653	-1
ENSG00000184613	-3.93617	0.0653273	5.47261	-54.0164	2.81e-24	9.68e-22	45.7827	4753	NELL2	neural EGFL like 2 [Source:HGNC Symbol;Acc:HGNC:7751]	12	44508275	44921848	-1
ENSG00000197635	-3.91139	0.066459	0.0815399	-12.3391	3.6e-11	2.57e-10	15.7551	1803	DPP4	dipeptidyl peptidase 4 [Source:HGNC Symbol;Acc:HGNC:3009]	2	161992241	162074542	-1
ENSG00000235568	-3.90818	0.0666072	-0.251647	-12.8788	1.61e-11	1.24e-10	16.5089	150372	NFAM1	NFAT activating protein with ITAM motif 1 [Source:HGNC Symbol;Acc:HGNC:29872]	22	42380410	42432395	-1
ENSG00000104213	-3.8958	0.0671812	-0.278246	-14.1875	2.51e-12	2.33e-11	18.2744	5157	PDGFRL	platelet derived growth factor receptor like [Source:HGNC Symbol;Acc:HGNC:8805]	8	17576433	17644071	1
ENSG00000167779	-3.8949	0.0672233	0.43258	-17.397	4.55e-14	6.36e-13	22.2087	3489	IGFBP6	insulin like growth factor binding protein 6 [Source:HGNC Symbol;Acc:HGNC:5475]	12	53097436	53102345	1
ENSG00000153404	-3.89018	0.0674434	-0.677323	-11.2077	2.15e-10	1.29e-09	13.9844	153478	PLEKHG4B	pleckstrin homology and RhoGEF domain containing G4B [Source:HGNC Symbol;Acc:HGNC:29399]	5	92151	189972	1
ENSG00000143195	-3.86794	0.0684909	4.31449	-23.3713	1.15e-16	3.28e-15	28.2517	387597	ILDR2	immunoglobulin like domain containing receptor 2 [Source:HGNC Symbol;Acc:HGNC:18131]	1	166895711	166975482	-1
ENSG00000163624	-3.859	0.068917	-0.161898	-14.2716	2.24e-12	2.1e-11	18.4054	1040	CDS1	CDP-diacylglycerol synthase 1 [Source:HGNC Symbol;Acc:HGNC:1800]	4	84582979	84651338	1
ENSG00000181649	-3.8574	0.0689934	-0.733053	-14.2619	2.27e-12	2.12e-11	18.3175	7262	PHLDA2	pleckstrin homology like domain family A member 2 [Source:HGNC Symbol;Acc:HGNC:12385]	11	2928273	2929455	-1
ENSG00000267909	-3.85152	0.0692751	-0.671472	-10.3846	8.58e-10	4.53e-09	12.6407	56936	CCDC177	coiled-coil domain containing 177 [Source:HGNC Symbol;Acc:HGNC:23243]	14	69569816	69574837	-1
ENSG00000254453	-3.83465	0.0700898	-0.196005	-13.6976	4.95e-12	4.28e-11	17.647	100874014	NAV2-AS2	NAV2 antisense RNA 2 [Source:HGNC Symbol;Acc:HGNC:40743]	11	20043846	20049303	-1
ENSG00000197245	-3.83066	0.0702842	-0.201425	-12.3512	3.54e-11	2.53e-10	15.7559	79927	FAM110D	family with sequence similarity 110 member D [Source:HGNC Symbol;Acc:HGNC:25860]	1	26159020	26163962	1
ENSG00000166292	-3.80912	0.0713412	0.438401	-16.3473	1.57e-13	1.94e-12	21.0438	55273	TMEM100	transmembrane protein 100 [Source:HGNC Symbol;Acc:HGNC:25607]	17	55719627	55732121	-1
ENSG00000149591	-3.80666	0.0714632	4.93564	-13.053	1.24e-11	9.85e-11	16.1854	6876	TAGLN	transgelin [Source:HGNC Symbol;Acc:HGNC:11553]	11	117199321	117204782	1
ENSG00000183778	-3.79646	0.0719702	0.417717	-16.2011	1.87e-13	2.24e-12	20.874	10317	B3GALT5	beta-1,3-galactosyltransferase 5 [Source:HGNC Symbol;Acc:HGNC:920]	21	39556442	39673137	1
ENSG00000204054	-3.78414	0.0725874	1.75078	-22.8962	1.75e-16	4.73e-15	27.7877		LINC00963	long intergenic non-protein coding RNA 963 [Source:HGNC Symbol;Acc:HGNC:48716]	9	129483451	129513686	1
ENSG00000103449	-3.78098	0.0727464	5.0433	-45.6462	9.83e-23	1.98e-20	42.262	6299	SALL1	spalt like transcription factor 1 [Source:HGNC Symbol;Acc:HGNC:10524]	16	51135975	51151367	-1
ENSG00000169594	-3.78054	0.0727684	0.820403	-11.8764	7.37e-11	4.9e-10	15.0532	646	BNC1	basonuclin 1 [Source:HGNC Symbol;Acc:HGNC:1081]	15	83255903	83284714	-1
ENSG00000142178	-3.77849	0.0728721	-1.11641	-9.33657	5.59e-09	2.52e-08	10.8073	150094	SIK1	salt inducible kinase 1 [Source:HGNC Symbol;Acc:HGNC:11142]	21	43414515	43427128	-1
ENSG00000066382	-3.77689	0.0729528	0.856263	-15.906	2.69e-13	3.12e-12	20.5826	744	MPPED2	metallophosphoesterase domain containing 2 [Source:HGNC Symbol;Acc:HGNC:1180]	11	30384493	30586872	-1
ENSG00000163081	-3.77562	0.0730171	0.567661	-18.3221	1.61e-14	2.52e-13	23.229	151278	CCDC140	coiled-coil domain containing 140 [Source:HGNC Symbol;Acc:HGNC:26514]	2	222298147	222305217	1
ENSG00000186354	-3.77171	0.0732155	0.874785	-20.3654	1.91e-15	3.82e-14	25.3131	286223	C9orf47	chromosome 9 open reading frame 47 [Source:HGNC Symbol;Acc:HGNC:23669]	9	88990863	88996140	1
ENSG00000133687	-3.75999	0.0738125	2.51339	-28.5142	1.88e-18	9.16e-17	32.289	83857	TMTC1	transmembrane and tetratricopeptide repeat containing 1 [Source:HGNC Symbol;Acc:HGNC:24099]	12	29500840	29784759	-1
ENSG00000152092	-3.75858	0.0738847	3.25813	-16.4516	1.38e-13	1.73e-12	21.1575	460	ASTN1	astrotactin 1 [Source:HGNC Symbol;Acc:HGNC:773]	1	176857302	177164973	-1
ENSG00000221869	-3.75779	0.073925	-0.862428	-13.0241	1.3e-11	1.02e-10	16.6703	1052	CEBPD	CCAAT/enhancer binding protein delta [Source:HGNC Symbol;Acc:HGNC:1835]	8	47736909	47739086	-1
ENSG00000272273	-3.75093	0.0742777	1.11651	-19.4074	5.06e-15	9.03e-14	24.4498	105379695	XXbac-BPG252P9.10		6	30742929	30743592	1
ENSG00000085117	-3.75055	0.0742969	3.67416	-18.821	9.4e-15	1.56e-13	23.8374	3732	CD82	CD82 molecule [Source:HGNC Symbol;Acc:HGNC:6210]	11	44564427	44620363	1
ENSG00000166689	-3.74522	0.0745721	1.00328	-13.6595	5.22e-12	4.5e-11	17.6789	144100	PLEKHA7	pleckstrin homology domain containing A7 [Source:HGNC Symbol;Acc:HGNC:27049]	11	16777317	17014443	-1
ENSG00000166105	-3.7309	0.0753161	1.02648	-16.2459	1.77e-13	2.14e-12	21.0055	112937	GLB1L3	galactosidase beta 1 like 3 [Source:HGNC Symbol;Acc:HGNC:25147]	11	134274245	134319564	1
ENSG00000259580	-3.73003	0.0753615	-0.219876	-13.2297	9.63e-12	7.77e-11	17.0132		RP11-37C7.1		15	39770559	39801333	-1
ENSG00000129009	-3.72265	0.0757481	1.66366	-21.7387	5.05e-16	1.2e-14	26.7613	3671	ISLR	immunoglobulin superfamily containing leucine rich repeat [Source:HGNC Symbol;Acc:HGNC:6133]	15	74173671	74176872	1
ENSG00000135362	-3.70967	0.0764323	1.60978	-22.3418	2.89e-16	7.37e-15	27.2861	79899	PRR5L	proline rich 5 like [Source:HGNC Symbol;Acc:HGNC:25878]	11	36296288	36465204	1
ENSG00000125810	-3.7002	0.076936	0.324529	-7.92348	8.7e-08	3.12e-07	8.01089	22918	CD93	CD93 molecule [Source:HGNC Symbol;Acc:HGNC:15855]	20	23079349	23086340	-1
ENSG00000138653	-3.69897	0.0770013	1.54595	-19.6843	3.8e-15	6.94e-14	24.7987	64579	NDST4	N-deacetylase and N-sulfotransferase 4 [Source:HGNC Symbol;Acc:HGNC:20779]	4	114827763	115113876	-1
ENSG00000254894	-3.69497	0.0772151	-0.0264628	-14.103	2.82e-12	2.58e-11	18.2163		NAV2-AS1	NAV2 antisense RNA 1 [Source:HGNC Symbol;Acc:HGNC:40744]	11	20119684	20120632	-1
ENSG00000119698	-3.69413	0.0772604	0.545986	-18.0244	2.24e-14	3.39e-13	22.9217	57718	PPP4R4	protein phosphatase 4 regulatory subunit 4 [Source:HGNC Symbol;Acc:HGNC:23788]	14	94146128	94279735	1
ENSG00000092969	-3.67843	0.0781057	-0.434085	-12.3769	3.4e-11	2.43e-10	15.778	7042	TGFB2	transforming growth factor beta 2 [Source:HGNC Symbol;Acc:HGNC:11768]	1	218346235	218444619	1
ENSG00000156140	-3.66666	0.0787455	3.28386	-32.3968	1.32e-19	9.09e-18	35.0163	9508	ADAMTS3	ADAM metallopeptidase with thrombospondin type 1 motif 3 [Source:HGNC Symbol;Acc:HGNC:219]	4	72280969	72569386	-1
ENSG00000278909	-3.66544	0.078812	0.918871	-18.1533	1.94e-14	2.99e-13	23.1343		RP11-401P9.7		16	50555355	50558719	1
ENSG00000158270	-3.66472	0.0788515	2.37644	-21.2798	7.81e-16	1.75e-14	26.4205	81035	COLEC12	collectin subfamily member 12 [Source:HGNC Symbol;Acc:HGNC:16016]	18	316740	500722	-1
ENSG00000143248	-3.64339	0.0800261	4.31493	-15.2659	6.04e-13	6.4e-12	19.4329	8490	RGS5	regulator of G-protein signaling 5 [Source:HGNC Symbol;Acc:HGNC:10001]	1	163111121	163321791	-1
ENSG00000088881	-3.6433	0.0800306	-0.622828	-11.6804	1e-10	6.44e-10	14.7223	57593	EBF4	early B-cell factor 4 [Source:HGNC Symbol;Acc:HGNC:29278]	20	2692878	2760108	1
ENSG00000185339	-3.63254	0.0806302	3.30128	-30.2791	5.4e-19	3.19e-17	33.648	6948	TCN2	transcobalamin 2 [Source:HGNC Symbol;Acc:HGNC:11653]	22	30606838	30627278	1
ENSG00000162105	-3.6254	0.0810299	1.10124	-19.2266	6.12e-15	1.07e-13	24.2765	22941	SHANK2	SH3 and multiple ankyrin repeat domains 2 [Source:HGNC Symbol;Acc:HGNC:14295]	11	70467856	71252577	-1
ENSG00000260029	-3.62478	0.0810648	0.0823927	-14.9035	9.65e-13	9.79e-12	19.2643		RP11-401P9.1		16	50551824	50553940	-1
ENSG00000146674	-3.62291	0.0811698	2.62335	-15.5385	4.27e-13	4.68e-12	20.0862	3486	IGFBP3	insulin like growth factor binding protein 3 [Source:HGNC Symbol;Acc:HGNC:5472]	7	45912245	45921874	-1
ENSG00000153253	-3.61321	0.0817174	0.520106	-14.3882	1.91e-12	1.82e-11	18.6509	6328	SCN3A	sodium voltage-gated channel alpha subunit 3 [Source:HGNC Symbol;Acc:HGNC:10590]	2	165087522	165204067	-1
ENSG00000136869	-3.58886	0.0831088	3.09093	-23.9233	7.1e-17	2.13e-15	28.8161	7099	TLR4	toll like receptor 4 [Source:HGNC Symbol;Acc:HGNC:11850]	9	117704332	117716871	1
ENSG00000214491	-3.5729	0.0840328	0.744023	-15.5992	3.95e-13	4.37e-12	20.2072	730005	SEC14L6	SEC14 like lipid binding 6 [Source:HGNC Symbol;Acc:HGNC:40047]	22	30522799	30546682	-1
ENSG00000254693	-3.57011	0.0841956	-0.241723	-11.1595	2.33e-10	1.38e-09	13.9261		RP11-58K22.5		11	44604508	44605337	-1
ENSG00000225706	-3.56931	0.0842423	0.055861	-15.8378	2.93e-13	3.36e-12	20.3972		PTPRD-AS1	PTPRD antisense RNA 1 [Source:HGNC Symbol;Acc:HGNC:49753]	9	8858130	8862255	1
ENSG00000154928	-3.56929	0.0842437	2.07452	-23.9692	6.83e-17	2.07e-15	28.7735	2047	EPHB1	EPH receptor B1 [Source:HGNC Symbol;Acc:HGNC:3392]	3	134597801	135260467	1
ENSG00000133083	-3.56851	0.0842891	1.11314	-16.6243	1.12e-13	1.44e-12	21.4626	9201	DCLK1	doublecortin like kinase 1 [Source:HGNC Symbol;Acc:HGNC:2700]	13	35768652	36131306	-1
ENSG00000124212	-3.56517	0.0844843	1.01022	-17.538	3.87e-14	5.49e-13	22.4887	5740	PTGIS	prostaglandin I2 (prostacyclin) synthase [Source:HGNC Symbol;Acc:HGNC:9603]	20	49503874	49568146	-1
ENSG00000181444	-3.56409	0.0845477	-0.483769	-10.0921	1.43e-09	7.26e-09	12.1448	168544	ZNF467	zinc finger protein 467 [Source:HGNC Symbol;Acc:HGNC:23154]	7	149764182	149773479	-1
ENSG00000169856	-3.56223	0.0846566	-0.147484	-9.2009	7.2e-09	3.16e-08	10.5394	3175	ONECUT1	one cut homeobox 1 [Source:HGNC Symbol;Acc:HGNC:8138]	15	52756989	52791078	-1
ENSG00000111783	-3.56124	0.0847148	2.09648	-16.3423	1.58e-13	1.95e-12	21.1353	5992	RFX4	regulatory factor X4 [Source:HGNC Symbol;Acc:HGNC:9985]	12	106582907	106762803	1
ENSG00000179242	-3.55529	0.0850651	1.55662	-15.0752	7.72e-13	7.98e-12	19.5692	1002	CDH4	cadherin 4 [Source:HGNC Symbol;Acc:HGNC:1763]	20	61252426	61940617	1
ENSG00000079841	-3.546	0.0856144	0.579245	-14.7198	1.23e-12	1.22e-11	19.089	22999	RIMS1	regulating synaptic membrane exocytosis 1 [Source:HGNC Symbol;Acc:HGNC:17282]	6	71886703	72403143	1
ENSG00000152931	-3.53979	0.0859838	0.49965	-14.1772	2.55e-12	2.36e-11	18.3725	25859	PART1	prostate androgen-regulated transcript 1 (non-protein coding) [Source:HGNC Symbol;Acc:HGNC:17263]	5	60487713	60547657	1
ENSG00000100626	-3.53854	0.0860584	1.66161	-19.3674	5.28e-15	9.35e-14	24.4981	57452	GALNT16	polypeptide N-acetylgalactosaminyltransferase 16 [Source:HGNC Symbol;Acc:HGNC:23233]	14	69259277	69357033	1
ENSG00000106236	-3.53851	0.08606	4.63015	-34.4492	3.65e-20	3.01e-18	36.3677	4885	NPTX2	neuronal pentraxin 2 [Source:HGNC Symbol;Acc:HGNC:7953]	7	98617297	98629868	1
ENSG00000179604	-3.51364	0.0875564	3.28357	-37.9487	4.79e-21	5.48e-19	38.2077	23580	CDC42EP4	CDC42 effector protein 4 [Source:HGNC Symbol;Acc:HGNC:17147]	17	73283624	73312175	-1
ENSG00000050438	-3.49921	0.0884365	4.19878	-20.6215	1.48e-15	3.04e-14	25.6276	9498	SLC4A8	solute carrier family 4 member 8 [Source:HGNC Symbol;Acc:HGNC:11034]	12	51391317	51515763	1
ENSG00000134769	-3.4897	0.0890217	2.44774	-17.0089	7.14e-14	9.49e-13	21.9079	1837	DTNA	dystrobrevin alpha [Source:HGNC Symbol;Acc:HGNC:3057]	18	34493290	34891844	1
ENSG00000166833	-3.48626	0.0892344	3.51253	-30.0694	6.24e-19	3.59e-17	33.5289	89797	NAV2	neuron navigator 2 [Source:HGNC Symbol;Acc:HGNC:15997]	11	19350724	20121598	1
ENSG00000144057	-3.48384	0.089384	1.35001	-20.1832	2.29e-15	4.44e-14	25.2727	84620	ST6GAL2	ST6 beta-galactoside alpha-2,6-sialyltransferase 2 [Source:HGNC Symbol;Acc:HGNC:10861]	2	106801600	106887108	-1
ENSG00000101327	-3.47026	0.0902295	1.52375	-18.5426	1.27e-14	2.04e-13	23.6313	5173	PDYN	prodynorphin [Source:HGNC Symbol;Acc:HGNC:8820]	20	1978757	1994285	-1
ENSG00000140807	-3.46551	0.0905266	6.8229	-45.9288	8.63e-23	1.84e-20	42.3489	85407	NKD1	naked cuticle homolog 1 [Source:HGNC Symbol;Acc:HGNC:17045]	16	50548330	50649249	1
ENSG00000178235	-3.45806	0.0909959	1.8379	-13.6102	5.6e-12	4.78e-11	17.5598	114798	SLITRK1	SLIT and NTRK like family member 1 [Source:HGNC Symbol;Acc:HGNC:20297]	13	83877205	83882393	-1
ENSG00000164879	-3.45189	0.0913857	0.327364	-14.695	1.27e-12	1.25e-11	19.0391	761	CA3	carbonic anhydrase 3 [Source:HGNC Symbol;Acc:HGNC:1374]	8	85373436	85449040	1
ENSG00000111331	-3.45055	0.0914704	-0.529096	-12.8936	1.57e-11	1.21e-10	16.5188	4940	OAS3	2'-5'-oligoadenylate synthetase 3 [Source:HGNC Symbol;Acc:HGNC:8088]	12	112938352	112973249	1
ENSG00000162599	-3.43304	0.0925874	2.05589	-24.0048	6.62e-17	2.02e-15	28.8097	4774	NFIA	nuclear factor I A [Source:HGNC Symbol;Acc:HGNC:7784]	1	60865259	61462793	1
ENSG00000142549	-3.43213	0.0926458	-1.05723	-11.6949	9.81e-11	6.3e-10	14.7317	402665	IGLON5	IgLON family member 5 [Source:HGNC Symbol;Acc:HGNC:34550]	19	51311848	51330354	1
ENSG00000101098	-3.428	0.0929114	1.31356	-19.8831	3.1e-15	5.79e-14	24.9784	140730	RIMS4	regulating synaptic membrane exocytosis 4 [Source:HGNC Symbol;Acc:HGNC:16183]	20	44751808	44810338	-1
ENSG00000136997	-3.42753	0.0929416	2.15649	-17.8127	2.84e-14	4.17e-13	22.848	4609	MYC	v-myc avian myelocytomatosis viral oncogene homolog [Source:HGNC Symbol;Acc:HGNC:7553]	8	127735434	127741434	1
ENSG00000250155	-3.42037	0.0934042	-0.110662	-12.5696	2.54e-11	1.87e-10	16.0947		CTD-2353F22.1		5	36666214	36725195	-1
ENSG00000166033	-3.41672	0.0936409	-0.274102	-11.7607	8.84e-11	5.76e-10	14.8727	5654	HTRA1	HtrA serine peptidase 1 [Source:HGNC Symbol;Acc:HGNC:9476]	10	122461525	122514908	1
ENSG00000034239	-3.41574	0.0937045	-0.867771	-9.55082	3.77e-09	1.76e-08	11.1933	79645	EFCAB1	EF-hand calcium binding domain 1 [Source:HGNC Symbol;Acc:HGNC:25678]	8	48710789	48735311	-1
ENSG00000120156	-3.39981	0.094745	-0.267326	-11.5937	1.15e-10	7.31e-10	14.6145	7010	TEK	TEK receptor tyrosine kinase [Source:HGNC Symbol;Acc:HGNC:11724]	9	27109141	27230175	1
ENSG00000261040	-3.38857	0.0954855	0.435983	-9.72409	2.75e-09	1.31e-08	11.4495		WFDC21P	WAP four-disulfide core domain 21, pseudogene [Source:HGNC Symbol;Acc:HGNC:50357]	17	60083566	60091885	-1
ENSG00000133124	-3.3833	0.0958352	0.154734	-9.18767	7.38e-09	3.24e-08	10.4869	8471	IRS4	insulin receptor substrate 4 [Source:HGNC Symbol;Acc:HGNC:6128]	X	108732482	108736409	-1
ENSG00000104321	-3.37817	0.0961765	0.21749	-14.8306	1.06e-12	1.07e-11	19.2031	8989	TRPA1	transient receptor potential cation channel subfamily A member 1 [Source:HGNC Symbol;Acc:HGNC:497]	8	72019917	72075617	-1
ENSG00000130707	-3.36251	0.0972266	2.2864	-18.6044	1.19e-14	1.92e-13	23.7157	445	ASS1	argininosuccinate synthase 1 [Source:HGNC Symbol;Acc:HGNC:758]	9	130444929	130501274	1
ENSG00000143590	-3.35803	0.097529	0.848287	-14.1272	2.73e-12	2.51e-11	18.3207	1944	EFNA3	ephrin A3 [Source:HGNC Symbol;Acc:HGNC:3223]	1	155078872	155087538	1
ENSG00000185338	-3.34829	0.0981896	-0.464515	-9.55523	3.74e-09	1.74e-08	11.1964	8651	SOCS1	suppressor of cytokine signaling 1 [Source:HGNC Symbol;Acc:HGNC:19383]	16	11254405	11256179	-1
ENSG00000128714	-3.32826	0.0995618	-0.643662	-11.8804	7.32e-11	4.87e-10	15.0322	3239	HOXD13	homeobox D13 [Source:HGNC Symbol;Acc:HGNC:5136]	2	176092891	176095938	1
ENSG00000261409	-3.32044	0.100103	-0.304184	-8.05438	6.68e-08	2.44e-07	8.32668		RP6-24A23.7		X	108719949	108724944	-1
ENSG00000222033	-3.31856	0.100234	-0.275597	-13.5847	5.8e-12	4.94e-11	17.5112	440925	LINC01124	long intergenic non-protein coding RNA 1124 [Source:HGNC Symbol;Acc:HGNC:49270]	2	170712451	170714567	-1
ENSG00000013297	-3.31386	0.100561	0.549633	-11.1505	2.36e-10	1.4e-09	13.8953	5010 101928583	CLDN11	claudin 11 [Source:HGNC Symbol;Acc:HGNC:8514]	3	170418865	170860380	1
ENSG00000063180	-3.30702	0.101038	2.6943	-16.9751	7.42e-14	9.83e-13	21.8367	770	CA11	carbonic anhydrase 11 [Source:HGNC Symbol;Acc:HGNC:1370]	19	48637942	48646312	-1
ENSG00000172789	-3.30247	0.101358	1.44743	-20.0859	2.52e-15	4.84e-14	25.2034	3222	HOXC5	homeobox C5 [Source:HGNC Symbol;Acc:HGNC:5127]	12	54032853	54035358	1
ENSG00000163132	-3.29517	0.101872	2.60876	-14.2648	2.26e-12	2.12e-11	18.3719	4487	MSX1	msh homeobox 1 [Source:HGNC Symbol;Acc:HGNC:7391]	4	4859666	4863936	1
ENSG00000101230	-3.29463	0.10191	-0.868397	-10.1947	1.19e-09	6.14e-09	12.3172	140862	ISM1	isthmin 1, angiogenesis inhibitor [Source:HGNC Symbol;Acc:HGNC:16213]	20	13221771	13300651	1
ENSG00000118640	-3.28661	0.102478	1.14894	-14.6063	1.43e-12	1.4e-11	18.9615	8673	VAMP8	vesicle associated membrane protein 8 [Source:HGNC Symbol;Acc:HGNC:12647]	2	85561562	85582031	1
ENSG00000169126	-3.27015	0.103654	2.15998	-25.6546	1.68e-17	6.22e-16	30.1616	55130	ARMC4	armadillo repeat containing 4 [Source:HGNC Symbol;Acc:HGNC:25583]	10	27812164	27999048	-1
ENSG00000131634	-3.26092	0.104319	0.565163	-11.5171	1.3e-10	8.16e-10	14.487	79652	TMEM204	transmembrane protein 204 [Source:HGNC Symbol;Acc:HGNC:14158]	16	1528688	1555580	1
ENSG00000164161	-3.25858	0.104489	4.77671	-45.1161	1.26e-22	2.49e-20	42.0187	64399	HHIP	hedgehog interacting protein [Source:HGNC Symbol;Acc:HGNC:14866]	4	144646021	144745271	1
ENSG00000002745	-3.25856	0.10449	0.240625	-16.0209	2.34e-13	2.75e-12	20.6679	51384	WNT16	Wnt family member 16 [Source:HGNC Symbol;Acc:HGNC:16267]	7	121325367	121341104	1
ENSG00000184557	-3.25693	0.104609	1.71751	-15.8	3.07e-13	3.51e-12	20.4796	9021	SOCS3	suppressor of cytokine signaling 3 [Source:HGNC Symbol;Acc:HGNC:19391]	17	78356778	78360077	-1
ENSG00000237380	-3.25304	0.104891	2.01471	-22.5682	2.35e-16	6.14e-15	27.5853		HOXD-AS2	HOXD cluster antisense RNA 2 [Source:HGNC Symbol;Acc:HGNC:43756]	2	176121611	176137098	-1
ENSG00000164733	-3.25246	0.104933	8.20167	-74.2885	3.28e-27	3.89e-24	52.5815	1508	CTSB	cathepsin B [Source:HGNC Symbol;Acc:HGNC:2527]	8	11842524	11869448	-1
ENSG00000112319	-3.24832	0.105235	3.94439	-24.8203	3.33e-17	1.14e-15	29.5197	2070	EYA4	EYA transcriptional coactivator and phosphatase 4 [Source:HGNC Symbol;Acc:HGNC:3522]	6	133240598	133532120	1
ENSG00000095777	-3.23585	0.106148	0.656816	-15.2509	6.15e-13	6.5e-12	19.779	53904	MYO3A	myosin IIIA [Source:HGNC Symbol;Acc:HGNC:7601]	10	25934267	26212527	1
ENSG00000167178	-3.23024	0.106561	1.41219	-18.3546	1.56e-14	2.44e-13	23.4305	57611	ISLR2	immunoglobulin superfamily containing leucine rich repeat 2 [Source:HGNC Symbol;Acc:HGNC:29286]	15	74100311	74138540	1
ENSG00000175879	-3.22762	0.106756	3.50664	-35.8171	1.61e-20	1.49e-18	37.1248	3234	HOXD8	homeobox D8 [Source:HGNC Symbol;Acc:HGNC:5139]	2	176129694	176132695	1
ENSG00000107731	-3.22642	0.106844	0.852728	-16.3225	1.62e-13	1.98e-12	21.0995	219699	UNC5B	unc-5 netrin receptor B [Source:HGNC Symbol;Acc:HGNC:12568]	10	71212570	71302864	1
ENSG00000128266	-3.22642	0.106844	2.84102	-21.5468	6.05e-16	1.4e-14	26.6742	2781	GNAZ	G protein subunit alpha z [Source:HGNC Symbol;Acc:HGNC:4395]	22	23070361	23125037	1
ENSG00000180071	-3.22567	0.1069	-0.179729	-12.0877	5.3e-11	3.66e-10	15.3789	253650	ANKRD18A	ankyrin repeat domain 18A [Source:HGNC Symbol;Acc:HGNC:23643]	9	38571358	38620660	-1
ENSG00000130475	-3.21106	0.107988	-0.718734	-8.87659	1.33e-08	5.52e-08	9.95316	23149	FCHO1	FCH domain only 1 [Source:HGNC Symbol;Acc:HGNC:29002]	19	17747718	17788568	1
ENSG00000102935	-3.21054	0.108027	5.54469	-55.8854	1.37e-24	5.64e-22	46.5294	23090	ZNF423	zinc finger protein 423 [Source:HGNC Symbol;Acc:HGNC:16762]	16	49487524	49857919	-1
ENSG00000165757	-3.20479	0.108458	1.64591	-20.268	2.1e-15	4.13e-14	25.4093	57608	KIAA1462	KIAA1462 [Source:HGNC Symbol;Acc:HGNC:29283]	10	30012800	30115494	-1
ENSG00000131459	-3.20117	0.10873	3.83252	-31.911	1.81e-19	1.2e-17	34.7743	9945	GFPT2	glutamine-fructose-6-phosphate transaminase 2 [Source:HGNC Symbol;Acc:HGNC:4242]	5	180300690	180353387	-1
ENSG00000220517	-3.17322	0.110858	0.0347861	-13.1151	1.14e-11	9.06e-11	16.894		ASS1P1	argininosuccinate synthetase 1 pseudogene 1 [Source:HGNC Symbol;Acc:HGNC:759]	6	25023247	25024483	-1
ENSG00000205593	-3.16265	0.111673	0.0917334	-10.5602	6.35e-10	3.44e-09	12.9319	414918	DENND6B	DENN domain containing 6B [Source:HGNC Symbol;Acc:HGNC:32690]	22	50309030	50327060	-1
ENSG00000250510	-3.13959	0.113472	3.91719	-33.7446	5.62e-20	4.39e-18	35.938	27239	GPR162	G protein-coupled receptor 162 [Source:HGNC Symbol;Acc:HGNC:16693]	12	6821545	6829972	1
ENSG00000257918	-3.13334	0.113965	-0.39515	-12.2963	3.85e-11	2.72e-10	15.6806		RP11-482D24.3		12	106714924	106733066	-1
ENSG00000162493	-3.13191	0.114078	2.17769	-18.8856	8.77e-15	1.47e-13	24.0179	10630	PDPN	podoplanin [Source:HGNC Symbol;Acc:HGNC:29602]	1	13583465	13617957	1
ENSG00000145147	-3.11523	0.115404	4.59506	-34.2422	4.14e-20	3.37e-18	36.2337	9353	SLIT2	slit guidance ligand 2 [Source:HGNC Symbol;Acc:HGNC:11086]	4	20253260	20620561	1
ENSG00000179603	-3.10959	0.115856	1.45294	-17.2681	5.28e-14	7.24e-13	22.2329	2918	GRM8	glutamate metabotropic receptor 8 [Source:HGNC Symbol;Acc:HGNC:4600]	7	126438598	127253294	-1
ENSG00000091490	-3.1067	0.116089	3.33947	-22.2045	3.28e-16	8.22e-15	27.255	23231	SEL1L3	SEL1L family member 3 [Source:HGNC Symbol;Acc:HGNC:29108]	4	25747427	25863760	-1
ENSG00000125355	-3.10046	0.116592	1.33653	-17.6122	3.56e-14	5.11e-13	22.6169	55026	TMEM255A	transmembrane protein 255A [Source:HGNC Symbol;Acc:HGNC:26086]	X	120258650	120311556	-1
ENSG00000130052	-3.09733	0.116845	2.93637	-25.0649	2.72e-17	9.61e-16	29.7726	9754	STARD8	StAR related lipid transfer domain containing 8 [Source:HGNC Symbol;Acc:HGNC:19161]	X	68647666	68725842	1
ENSG00000102524	-3.09464	0.117063	0.0324894	-11.2424	2.03e-10	1.22e-09	14.0614	10673	TNFSF13B	tumor necrosis factor superfamily member 13b [Source:HGNC Symbol;Acc:HGNC:11929]	13	108251240	108308484	1
ENSG00000226455	-3.08659	0.117719	-0.220989	-10.4543	7.61e-10	4.06e-09	12.7608		RP3-512E2.2		6	89950116	89953186	1
ENSG00000116194	-3.08569	0.117792	2.0522	-20.9542	1.07e-15	2.3e-14	26.1074	9068	ANGPTL1	angiopoietin like 1 [Source:HGNC Symbol;Acc:HGNC:489]	1	178849705	178871052	-1
ENSG00000095397	-3.08389	0.117939	0.620694	-15.571	4.09e-13	4.5e-12	20.1783	25861	WHRN	whirlin [Source:HGNC Symbol;Acc:HGNC:16361]	9	114402080	114505450	-1
ENSG00000234393	-3.07752	0.118461	0.722922	-13.26	9.22e-12	7.48e-11	17.1152		RP11-211N11.5		10	113710681	113719332	-1
ENSG00000162522	-3.06994	0.119085	2.06052	-22.0269	3.86e-16	9.51e-15	27.1109	57648	KIAA1522	KIAA1522 [Source:HGNC Symbol;Acc:HGNC:29301]	1	32741885	32774970	1
ENSG00000006210	-3.06351	0.119617	1.39343	-16.2725	1.72e-13	2.08e-12	21.0641	6376	CX3CL1	C-X3-C motif chemokine ligand 1 [Source:HGNC Symbol;Acc:HGNC:10647]	16	57372458	57385048	1
ENSG00000151388	-3.0606	0.119858	2.94575	-32.0882	1.61e-19	1.09e-17	34.8127	81792	ADAMTS12	ADAM metallopeptidase with thrombospondin type 1 motif 12 [Source:HGNC Symbol;Acc:HGNC:14605]	5	33523535	33892192	-1
ENSG00000064692	-3.05738	0.120126	1.1482	-19.4906	4.64e-15	8.35e-14	24.5867	9627	SNCAIP	synuclein alpha interacting protein [Source:HGNC Symbol;Acc:HGNC:11139]	5	122311354	122464219	1
ENSG00000055118	-3.05363	0.120439	1.80807	-16.5473	1.23e-13	1.57e-12	21.3862	3757	KCNH2	potassium voltage-gated channel subfamily H member 2 [Source:HGNC Symbol;Acc:HGNC:6251]	7	150944961	150978315	-1
ENSG00000225308	-3.05181	0.120591	0.291529	-13.0037	1.34e-11	1.05e-10	16.7468		ASS1P11	argininosuccinate synthetase 1 pseudogene 11 [Source:HGNC Symbol;Acc:HGNC:761]	7	21220213	21221428	-1
ENSG00000269959	-3.0512	0.120642	-0.968267	-9.43064	4.7e-09	2.15e-08	10.9776	102238594	SPACA6P-AS	SPACA6P antisense RNA [Source:HGNC Symbol;Acc:HGNC:49383]	19	51685363	51693456	-1
ENSG00000239922	-3.05086	0.12067	-0.538698	-8.44301	3.08e-08	1.19e-07	9.1078		RP11-71N10.1		3	147940004	148006755	1
ENSG00000270182	-3.04734	0.120965	-0.933954	-9.78593	2.46e-09	1.19e-08	11.6099		RP1-170O19.24		7	27158344	27158976	1
ENSG00000143512	-3.0456	0.121111	-0.899878	-10.0201	1.62e-09	8.15e-09	12.018	79802	HHIPL2	HHIP like 2 [Source:HGNC Symbol;Acc:HGNC:25842]	1	222522258	222548103	-1
ENSG00000204580	-3.044	0.121245	5.27993	-38.0876	4.44e-21	5.17e-19	38.4438	780 100616237	DDR1	discoidin domain receptor tyrosine kinase 1 [Source:HGNC Symbol;Acc:HGNC:2730]	6	30876421	30900156	1
ENSG00000138759	-3.04149	0.121457	4.7718	-39.3709	2.21e-21	2.78e-19	39.1691	80144	FRAS1	Fraser extracellular matrix complex subunit 1 [Source:HGNC Symbol;Acc:HGNC:19185]	4	78057570	78544269	1
ENSG00000145703	-3.0414	0.121464	4.1585	-24.5566	4.15e-17	1.36e-15	29.258	10788	IQGAP2	IQ motif containing GTPase activating protein 2 [Source:HGNC Symbol;Acc:HGNC:6111]	5	76403249	76708132	1
ENSG00000152760	-3.0408	0.121514	0.0513678	-11.1732	2.28e-10	1.36e-09	13.9484	200132	TCTEX1D1	Tctex1 domain containing 1 [Source:HGNC Symbol;Acc:HGNC:26882]	1	66752459	66778787	1
ENSG00000157423	-3.04053	0.121538	-0.00723668	-10.4582	7.56e-10	4.03e-09	12.76	54768	HYDIN	HYDIN, axonemal central pair apparatus protein [Source:HGNC Symbol;Acc:HGNC:19368]	16	70807378	71230722	-1
ENSG00000040731	-3.03911	0.121657	1.89282	-14.325	2.08e-12	1.97e-11	18.5341	1008	CDH10	cadherin 10 [Source:HGNC Symbol;Acc:HGNC:1749]	5	24487100	24644978	-1
ENSG00000169184	-3.03511	0.121995	1.4068	-14.7026	1.26e-12	1.24e-11	19.0792	4330	MN1	MN1 proto-oncogene, transcriptional regulator [Source:HGNC Symbol;Acc:HGNC:7180]	22	27748277	27801498	-1
ENSG00000250432	-3.02369	0.122964	-0.27205	-9.25825	6.47e-09	2.87e-08	10.6412	105379478	LINC01598	long intergenic non-protein coding RNA 1598 [Source:EntrezGene;Acc:105379478]	12	54085132	54125992	-1
ENSG00000256944	-3.02105	0.12319	0.514805	-15.1815	6.73e-13	7.04e-12	19.6875		RP11-881M11.1		11	60913166	60914052	-1
ENSG00000008735	-3.01643	0.123585	1.39723	-19.5762	4.25e-15	7.67e-14	24.7057	23542	MAPK8IP2	mitogen-activated protein kinase 8 interacting protein 2 [Source:HGNC Symbol;Acc:HGNC:6883]	22	50600685	50613981	1
ENSG00000106003	-3.00826	0.124286	1.49568	-16.8849	8.25e-14	1.08e-12	21.7916	3955	LFNG	LFNG O-fucosylpeptide 3-beta-N-acetylglucosaminyltransferase [Source:HGNC Symbol;Acc:HGNC:6560]	7	2512529	2529177	1
ENSG00000106665	-3.0015	0.12487	3.73504	-23.268	1.26e-16	3.54e-15	28.1799	7461	CLIP2	CAP-Gly domain containing linker protein 2 [Source:HGNC Symbol;Acc:HGNC:2586]	7	74289475	74405943	1
ENSG00000162849	-3.00039	0.124966	2.99082	-28.2552	2.28e-18	1.09e-16	32.2326	55083	KIF26B	kinesin family member 26B [Source:HGNC Symbol;Acc:HGNC:25484]	1	245154985	245709431	1
ENSG00000273621	-2.99556	0.125385	-0.32781	-10.3552	9.03e-10	4.75e-09	12.5933		uc_338	TUC338 [Source:RFAM;Acc:RF02271]	4	144739762	144739941	-1
ENSG00000183873	-2.98994	0.125875	1.81302	-20.2627	2.11e-15	4.15e-14	25.4242	6331	SCN5A	sodium voltage-gated channel alpha subunit 5 [Source:HGNC Symbol;Acc:HGNC:10593]	3	38548057	38649673	-1
ENSG00000155980	-2.98871	0.125982	0.972188	-10.5033	6.99e-10	3.76e-09	12.7563	3798	KIF5A	kinesin family member 5A [Source:HGNC Symbol;Acc:HGNC:6323]	12	57549998	57586632	1
ENSG00000134762	-2.9705	0.127583	0.840752	-15.4813	4.59e-13	5e-12	20.083	1825	DSC3	desmocollin 3 [Source:HGNC Symbol;Acc:HGNC:3037]	18	30990008	31042815	-1
ENSG00000085276	-2.97004	0.127623	2.64336	-25.8481	1.44e-17	5.42e-16	30.3914	2122	MECOM	MDS1 and EVI1 complex locus [Source:HGNC Symbol;Acc:HGNC:3498]	3	169083499	169663618	-1
ENSG00000164128	-2.96841	0.127768	-0.0398786	-11.6225	1.1e-10	7e-10	14.6669	4886	NPY1R	neuropeptide Y receptor Y1 [Source:HGNC Symbol;Acc:HGNC:7956]	4	163323961	163344832	-1
ENSG00000164949	-2.96837	0.127771	1.52886	-13.4365	7.16e-12	5.97e-11	17.3213	2669	GEM	GTP binding protein overexpressed in skeletal muscle [Source:HGNC Symbol;Acc:HGNC:4234]	8	94249253	94262350	-1
ENSG00000078269	-2.96038	0.128481	1.59357	-18.193	1.86e-14	2.87e-13	23.2702	8871	SYNJ2	synaptojanin 2 [Source:HGNC Symbol;Acc:HGNC:11504]	6	157981887	158099176	1
ENSG00000082497	-2.95731	0.128754	0.465639	-13.3475	8.13e-12	6.68e-11	17.2404	56256	SERTAD4	SERTA domain containing 4 [Source:HGNC Symbol;Acc:HGNC:25236]	1	210232799	210246631	1
ENSG00000198842	-2.95068	0.129347	0.27134	-13.9434	3.51e-12	3.14e-11	18.0587	92235	DUSP27	dual specificity phosphatase 27 (putative) [Source:HGNC Symbol;Acc:HGNC:25034]	1	167094045	167129165	1
ENSG00000144908	-2.94358	0.129985	-0.933136	-9.84741	2.21e-09	1.07e-08	11.7178	10840	ALDH1L1	aldehyde dehydrogenase 1 family member L1 [Source:HGNC Symbol;Acc:HGNC:3978]	3	126103562	126197994	-1
ENSG00000103154	-2.94177	0.130148	1.39593	-12.3074	3.78e-11	2.68e-10	15.6534	54550	NECAB2	N-terminal EF-hand calcium binding protein 2 [Source:HGNC Symbol;Acc:HGNC:23746]	16	83968632	84002776	1
ENSG00000249992	-2.94021	0.13029	0.189956	-10.7398	4.68e-10	2.61e-09	13.2257	25907	TMEM158	transmembrane protein 158 (gene/pseudogene) [Source:HGNC Symbol;Acc:HGNC:30293]	3	45224466	45226278	-1
ENSG00000155629	-2.93489	0.130771	0.0955473	-12.5001	2.82e-11	2.05e-10	16.008	118788	PIK3AP1	phosphoinositide-3-kinase adaptor protein 1 [Source:HGNC Symbol;Acc:HGNC:30034]	10	96593312	96720514	-1
ENSG00000176399	-2.93482	0.130777	2.52699	-18.0792	2.11e-14	3.22e-13	23.1113	63951	DMRTA1	DMRT like family A1 [Source:HGNC Symbol;Acc:HGNC:13826]	9	22446841	22455740	1
ENSG00000274904	-2.92632	0.13155	1.56395	-15.3928	5.13e-13	5.55e-12	19.9664		CTD-2515O10.5		16	30064306	30064825	-1
ENSG00000139174	-2.92094	0.132042	4.20932	-27.3632	4.43e-18	1.9e-16	31.5244	144165	PRICKLE1	prickle planar cell polarity protein 1 [Source:HGNC Symbol;Acc:HGNC:17019]	12	42456754	42590355	-1
ENSG00000227954	-2.91625	0.132471	-0.563363	-9.86618	2.13e-09	1.04e-08	11.7494	100507308	TARID	TCF21 antisense RNA inducing promoter demethylation [Source:HGNC Symbol;Acc:HGNC:50506]	6	133502252	133892802	-1
ENSG00000116574	-2.91545	0.132545	3.78265	-30.1698	5.82e-19	3.38e-17	33.6044	58480	RHOU	ras homolog family member U [Source:HGNC Symbol;Acc:HGNC:17794]	1	228735077	228746669	1
ENSG00000059804	-2.91367	0.132708	6.24423	-36.5864	1.03e-20	1.05e-18	37.4847	6515	SLC2A3	solute carrier family 2 member 3 [Source:HGNC Symbol;Acc:HGNC:11007]	12	7919230	7936275	-1
ENSG00000078295	-2.911	0.132954	-0.432595	-8.88448	1.31e-08	5.44e-08	9.94819	108	ADCY2	adenylate cyclase 2 [Source:HGNC Symbol;Acc:HGNC:233]	5	7396208	7830081	1
ENSG00000168899	-2.90576	0.133438	-0.811933	-11.2869	1.89e-10	1.14e-09	14.1144	10791	VAMP5	vesicle associated membrane protein 5 [Source:HGNC Symbol;Acc:HGNC:12646]	2	85584408	85593412	1
ENSG00000162817	-2.89873	0.134089	-0.197921	-11.3646	1.67e-10	1.02e-09	14.2584	79762	C1orf115	chromosome 1 open reading frame 115 [Source:HGNC Symbol;Acc:HGNC:25873]	1	220689845	220699157	1
ENSG00000164076	-2.89856	0.134105	2.5662	-18.9651	8.06e-15	1.37e-13	24.0773	79012	CAMKV	CaM kinase like vesicle associated [Source:HGNC Symbol;Acc:HGNC:28788]	3	49857988	49870222	-1
ENSG00000144730	-2.89854	0.134107	6.33534	-24.4358	4.59e-17	1.49e-15	28.8029	54756	IL17RD	interleukin 17 receptor D [Source:HGNC Symbol;Acc:HGNC:17616]	3	57089982	57170306	-1
ENSG00000254010	-2.89695	0.134255	0.496892	-10.2875	1.02e-09	5.3e-09	12.4281		RP11-103H7.5		8	126556896	126557433	1
ENSG00000181381	-2.89607	0.134338	1.78829	-15.194	6.62e-13	6.95e-12	19.6952	91351	DDX60L	DEAD-box helicase 60-like [Source:HGNC Symbol;Acc:HGNC:26429]	4	168356735	168537786	-1
ENSG00000167371	-2.89549	0.134392	1.22416	-14.0539	3.02e-12	2.74e-11	18.2092	112476	PRRT2	proline rich transmembrane protein 2 [Source:HGNC Symbol;Acc:HGNC:30500]	16	29811382	29815892	1
ENSG00000168874	-2.89372	0.134556	2.66009	-20.1007	2.49e-15	4.78e-14	25.2559	84913	ATOH8	atonal bHLH transcription factor 8 [Source:HGNC Symbol;Acc:HGNC:24126]	2	85751344	85788066	1
ENSG00000135605	-2.89364	0.134564	0.669452	-15.0357	8.12e-13	8.37e-12	19.5144	7006	TEC	tec protein tyrosine kinase [Source:HGNC Symbol;Acc:HGNC:11719]	4	48135783	48269864	-1
ENSG00000257178	-2.89005	0.134899	1.33017	-16.2085	1.86e-13	2.22e-12	20.9868	406902	MIR10A	microRNA 10a [Source:HGNC Symbol;Acc:HGNC:31497]	17	48579630	48582259	-1
ENSG00000135903	-2.88769	0.13512	5.07963	-45.7453	9.39e-23	1.97e-20	42.3262	5077	PAX3	paired box 3 [Source:HGNC Symbol;Acc:HGNC:8617]	2	222199888	222298996	-1
ENSG00000092850	-2.88035	0.135809	-0.250145	-11.2094	2.14e-10	1.28e-09	14.0096	27285	TEKT2	tektin 2 [Source:HGNC Symbol;Acc:HGNC:11725]	1	36084075	36088275	1
ENSG00000115594	-2.87637	0.136184	-0.30268	-10.1127	1.38e-09	7.01e-09	12.1737	3554	IL1R1	interleukin 1 receptor type 1 [Source:HGNC Symbol;Acc:HGNC:5993]	2	102064544	102179874	1
ENSG00000100767	-2.87489	0.136324	2.71817	-12.3145	3.74e-11	2.65e-10	15.4503	89932	PAPLN	papilin, proteoglycan like sulfated glycoprotein [Source:HGNC Symbol;Acc:HGNC:19262]	14	73237497	73274640	1
ENSG00000136237	-2.86941	0.136843	3.00495	-18.7232	1.04e-14	1.71e-13	23.7679	9771	RAPGEF5	Rap guanine nucleotide exchange factor 5 [Source:HGNC Symbol;Acc:HGNC:16862]	7	22118238	22357144	-1
ENSG00000188582	-2.86737	0.137037	0.242862	-13.8532	3.98e-12	3.52e-11	17.9363	344838	PAQR9	progestin and adipoQ receptor family member 9 [Source:HGNC Symbol;Acc:HGNC:30131]	3	142949164	142963682	-1
ENSG00000148123	-2.86458	0.137302	-0.126881	-13.4118	7.41e-12	6.16e-11	17.3064	54886	PLPPR1	phospholipid phosphatase related 1 [Source:HGNC Symbol;Acc:HGNC:25993]	9	101028709	101325135	1
ENSG00000263424	-2.8591	0.137824	3.61346	-19.235	6.06e-15	1.06e-13	24.2306		CTD-2541J13.2		18	67506589	67514030	1
ENSG00000185070	-2.85879	0.137854	3.85522	-29.1813	1.16e-18	6.16e-17	32.9035	23768	FLRT2	fibronectin leucine rich transmembrane protein 2 [Source:HGNC Symbol;Acc:HGNC:3761]	14	85530144	85654426	1
ENSG00000148798	-2.85443	0.138271	2.91124	-22.8025	1.9e-16	5.1e-15	27.8265	9118	INA	internexin neuronal intermediate filament protein alpha [Source:HGNC Symbol;Acc:HGNC:6057]	10	103277163	103290351	1
ENSG00000151812	-2.85001	0.138695	-0.994451	-11.1655	2.3e-10	1.37e-09	13.9116	341880	SLC35F4	solute carrier family 35 member F4 [Source:HGNC Symbol;Acc:HGNC:19845]	14	57563922	57982194	-1
ENSG00000142621	-2.8446	0.139216	0.185587	-9.0874	8.9e-09	3.84e-08	10.2773	114827	FHAD1	forkhead associated phosphopeptide binding domain 1 [Source:HGNC Symbol;Acc:HGNC:29408]	1	15247272	15400283	1
ENSG00000187867	-2.84159	0.139507	2.1865	-15.725	3.37e-13	3.8e-12	20.3366	342979	PALM3	paralemmin 3 [Source:HGNC Symbol;Acc:HGNC:33274]	19	14053365	14059159	-1
ENSG00000149571	-2.83587	0.140061	0.545489	-12.8247	1.74e-11	1.33e-10	16.4861	84623	KIRREL3	kin of IRRE like 3 (Drosophila) [Source:HGNC Symbol;Acc:HGNC:23204]	11	126423359	127003460	-1
ENSG00000145721	-2.83491	0.140155	2.7033	-12.6017	2.42e-11	1.79e-10	15.8953	167410	LIX1	limb and CNS expressed 1 [Source:HGNC Symbol;Acc:HGNC:18581]	5	97091867	97142872	-1
ENSG00000234567	-2.8332	0.140321	-0.48564	-8.41737	3.24e-08	1.25e-07	9.04899		RP1-283K11.2		6	133452857	133456605	-1
ENSG00000154127	-2.8307	0.140564	4.23325	-33.4532	6.74e-20	5.12e-18	35.7531	84959	UBASH3B	ubiquitin associated and SH3 domain containing B [Source:HGNC Symbol;Acc:HGNC:29884]	11	122655675	122814473	1
ENSG00000257225	-2.83044	0.140589	3.37561	-20.762	1.29e-15	2.69e-14	25.8462		RP11-328C8.4		12	42459366	42466128	1
ENSG00000171451	-2.82626	0.140998	4.68908	-22.3512	2.86e-16	7.31e-15	27.178	92126	DSEL	dermatan sulfate epimerase-like [Source:HGNC Symbol;Acc:HGNC:18144]	18	67506582	67516980	-1
ENSG00000166405	-2.82592	0.14103	1.19769	-14.9673	8.88e-13	9.08e-12	19.4308	79608	RIC3	RIC3 acetylcholine receptor chaperone [Source:HGNC Symbol;Acc:HGNC:30338]	11	8106093	8169055	-1
ENSG00000066248	-2.82591	0.141032	-0.426854	-13.183	1.03e-11	8.27e-11	16.9618	25791	NGEF	neuronal guanine nucleotide exchange factor [Source:HGNC Symbol;Acc:HGNC:7807]	2	232878686	233013272	-1
ENSG00000124942	-2.82565	0.141057	6.33589	-29.0606	1.27e-18	6.62e-17	32.5118	79026	AHNAK	AHNAK nucleoprotein [Source:HGNC Symbol;Acc:HGNC:347]	11	62433542	62556235	-1
ENSG00000184588	-2.82314	0.141302	2.13753	-18.7635	1e-14	1.65e-13	23.8847	5142	PDE4B	phosphodiesterase 4B [Source:HGNC Symbol;Acc:HGNC:8781]	1	65792514	66374579	1
ENSG00000135631	-2.8228	0.141336	2.04364	-19.9269	2.97e-15	5.54e-14	25.0986	26056	RAB11FIP5	RAB11 family interacting protein 5 [Source:HGNC Symbol;Acc:HGNC:24845]	2	73073382	73156721	-1
ENSG00000170345	-2.82123	0.14149	1.51383	-11.6992	9.74e-11	6.27e-10	14.6753	2353	FOS	Fos proto-oncogene, AP-1 transcription factor subunit [Source:HGNC Symbol;Acc:HGNC:3796]	14	75278774	75282230	1
ENSG00000165891	-2.82022	0.141589	4.68955	-35.8753	1.56e-20	1.44e-18	37.2054	144455	E2F7	E2F transcription factor 7 [Source:HGNC Symbol;Acc:HGNC:23820]	12	77021247	77065580	-1
ENSG00000157927	-2.81609	0.141994	2.12874	-20.8785	1.15e-15	2.45e-14	26.0405	55698	RADIL	Rap associating with DIL domain [Source:HGNC Symbol;Acc:HGNC:22226]	7	4797055	4883719	-1
ENSG00000124440	-2.81499	0.142103	-0.554718	-9.36749	5.28e-09	2.39e-08	10.8528	64344	HIF3A	hypoxia inducible factor 3 alpha subunit [Source:HGNC Symbol;Acc:HGNC:15825]	19	46297046	46343433	1
ENSG00000197769	-2.80794	0.142799	-0.135723	-11.8958	7.15e-11	4.76e-10	15.0916	440738	MAP1LC3C	microtubule associated protein 1 light chain 3 gamma [Source:HGNC Symbol;Acc:HGNC:13353]	1	241995490	241999073	-1
ENSG00000148926	-2.8074	0.142853	2.89909	-16.6295	1.12e-13	1.43e-12	21.3638	133	ADM	adrenomedullin [Source:HGNC Symbol;Acc:HGNC:259]	11	10304680	10307397	1
ENSG00000154529	-2.80123	0.143465	2.07153	-19.2403	6.03e-15	1.06e-13	24.3918	728577 100289279	CNTNAP3B	contactin associated protein-like 3B [Source:HGNC Symbol;Acc:HGNC:32035]	9	41890314	42129510	-1
ENSG00000104998	-2.78677	0.14491	2.85361	-17.7653	3e-14	4.37e-13	22.7109	9466	IL27RA	interleukin 27 receptor subunit alpha [Source:HGNC Symbol;Acc:HGNC:17290]	19	14031748	14053216	1
ENSG00000100078	-2.7864	0.144947	5.23827	-52.6706	4.79e-24	1.49e-21	45.2875	50487	PLA2G3	phospholipase A2 group III [Source:HGNC Symbol;Acc:HGNC:17934]	22	31134809	31140607	-1
ENSG00000158815	-2.78518	0.14507	-0.438218	-9.31009	5.87e-09	2.63e-08	10.7412	8822	FGF17	fibroblast growth factor 17 [Source:HGNC Symbol;Acc:HGNC:3673]	8	22042398	22048809	1
ENSG00000112182	-2.77973	0.145619	3.40013	-29.2051	1.14e-18	6.07e-17	32.9321	60468	BACH2	BTB domain and CNC homolog 2 [Source:HGNC Symbol;Acc:HGNC:14078]	6	89926529	90296908	-1
ENSG00000107099	-2.77431	0.146167	1.65263	-13.7153	4.83e-12	4.19e-11	17.6987	81704	DOCK8	dedicator of cytokinesis 8 [Source:HGNC Symbol;Acc:HGNC:19191]	9	214854	465259	1
ENSG00000157570	-2.77205	0.146397	4.32192	-33.0598	8.63e-20	6.25e-18	35.4987	90139	TSPAN18	tetraspanin 18 [Source:HGNC Symbol;Acc:HGNC:20660]	11	44726465	44932421	1
ENSG00000165029	-2.77091	0.146511	1.78906	-12.508	2.79e-11	2.03e-10	15.9035	19	ABCA1	ATP binding cassette subfamily A member 1 [Source:HGNC Symbol;Acc:HGNC:29]	9	104781002	104928237	-1
ENSG00000118432	-2.76952	0.146653	-0.779727	-10.2159	1.15e-09	5.93e-09	12.3575	1268	CNR1	cannabinoid receptor 1 [Source:HGNC Symbol;Acc:HGNC:2159]	6	88139864	88166359	-1
ENSG00000196218	-2.76929	0.146676	0.608331	-13.5364	6.21e-12	5.25e-11	17.5068	6261	RYR1	ryanodine receptor 1 [Source:HGNC Symbol;Acc:HGNC:10483]	19	38433699	38587564	1
ENSG00000133107	-2.7669	0.14692	0.327693	-11.8323	7.9e-11	5.22e-10	14.988	7223	TRPC4	transient receptor potential cation channel subfamily C member 4 [Source:HGNC Symbol;Acc:HGNC:12336]	13	37636636	37870425	-1
ENSG00000249669	-2.76689	0.146921	0.0691286	-11.0832	2.64e-10	1.55e-09	13.7984	406935	CARMN	cardiac mesoderm enhancer-associated non-coding RNA [Source:HGNC Symbol;Acc:HGNC:42872]	5	149406689	149432835	1
ENSG00000130147	-2.76675	0.146935	4.99268	-33.186	7.97e-20	5.82e-18	35.5239	23677	SH3BP4	SH3 domain binding protein 4 [Source:HGNC Symbol;Acc:HGNC:10826]	2	234951973	235055714	1
ENSG00000155974	-2.76534	0.147079	3.58337	-34.332	3.92e-20	3.2e-18	36.2879	23426	GRIP1	glutamate receptor interacting protein 1 [Source:HGNC Symbol;Acc:HGNC:18708]	12	66347431	66804186	-1
ENSG00000164867	-2.75571	0.148063	0.601931	-11.802	8.28e-11	5.44e-10	14.9272	4846	NOS3	nitric oxide synthase 3 [Source:HGNC Symbol;Acc:HGNC:7876]	7	150990995	151014588	1
ENSG00000260122	-2.75101	0.148546	1.30898	-14.6036	1.43e-12	1.4e-11	18.9466		RP11-923I11.3		12	51809705	51810600	-1
ENSG00000152689	-2.74827	0.14883	-0.534215	-10.6542	5.41e-10	2.97e-09	13.0991	25780	RASGRP3	RAS guanyl releasing protein 3 [Source:HGNC Symbol;Acc:HGNC:14545]	2	33436324	33564750	1
ENSG00000117069	-2.74402	0.149268	4.03209	-15.8164	3.01e-13	3.44e-12	20.1223	81849	ST6GALNAC5	ST6 N-acetylgalactosaminide alpha-2,6-sialyltransferase 5 [Source:HGNC Symbol;Acc:HGNC:19342]	1	76867441	77065711	1
ENSG00000183762	-2.7433	0.149343	3.87711	-28.7636	1.57e-18	7.91e-17	32.5971	83999	KREMEN1	kringle containing transmembrane protein 1 [Source:HGNC Symbol;Acc:HGNC:17550]	22	29073078	29168333	1
ENSG00000107719	-2.74232	0.149444	3.19455	-27.9187	2.92e-18	1.33e-16	31.9981	27143	PALD1	phosphatase domain containing, paladin 1 [Source:HGNC Symbol;Acc:HGNC:23530]	10	70478821	70568449	1
ENSG00000152402	-2.73494	0.150211	3.71824	-12.3264	3.68e-11	2.61e-10	15.2302	2977	GUCY1A2	guanylate cyclase 1 soluble subunit alpha 2 [Source:HGNC Symbol;Acc:HGNC:4684]	11	106674012	107018524	-1
ENSG00000198822	-2.73422	0.150286	0.599926	-13.2491	9.36e-12	7.58e-11	17.0996	2913	GRM3	glutamate metabotropic receptor 3 [Source:HGNC Symbol;Acc:HGNC:4595]	7	86643914	86864884	1
ENSG00000111799	-2.73271	0.150443	6.26207	-34.2163	4.2e-20	3.41e-18	36.0314	1303	COL12A1	collagen type XII alpha 1 chain [Source:HGNC Symbol;Acc:HGNC:2188]	6	75084326	75206051	-1
ENSG00000198682	-2.7317	0.150549	2.47973	-18.9079	8.57e-15	1.44e-13	24.0175	9060	PAPSS2	3'-phosphoadenosine 5'-phosphosulfate synthase 2 [Source:HGNC Symbol;Acc:HGNC:8604]	10	87659613	87747705	1
ENSG00000182168	-2.731	0.150622	5.47646	-42.7435	3.93e-22	6.21e-20	40.877	8633	UNC5C	unc-5 netrin receptor C [Source:HGNC Symbol;Acc:HGNC:12569]	4	95162504	95549206	-1
ENSG00000165694	-2.72973	0.150754	2.433	-15.192	6.64e-13	6.96e-12	19.6125	90167	FRMD7	FERM domain containing 7 [Source:HGNC Symbol;Acc:HGNC:8079]	X	132076993	132128020	-1
ENSG00000171604	-2.72919	0.150811	5.22998	-39.4932	2.07e-21	2.64e-19	39.2083	51523	CXXC5	CXXC finger protein 5 [Source:HGNC Symbol;Acc:HGNC:26943]	5	139647299	139683882	1
ENSG00000007402	-2.72786	0.150949	0.602425	-13.416	7.37e-12	6.12e-11	17.337	9254	CACNA2D2	calcium voltage-gated channel auxiliary subunit alpha2delta 2 [Source:HGNC Symbol;Acc:HGNC:1400]	3	50362799	50504244	-1
ENSG00000176928	-2.72744	0.150993	0.312531	-11.3196	1.79e-10	1.09e-09	14.1721	51301	GCNT4	glucosaminyl (N-acetyl) transferase 4, core 2 [Source:HGNC Symbol;Acc:HGNC:17973]	5	75025346	75030899	-1
ENSG00000273046	-2.72734	0.151004	1.96157	-19.0107	7.68e-15	1.31e-13	24.1515		RP11-834C11.14		12	54017110	54035361	1
ENSG00000137962	-2.7261	0.151134	-0.0867342	-11.2201	2.11e-10	1.26e-09	14.0252	9411	ARHGAP29	Rho GTPase activating protein 29 [Source:HGNC Symbol;Acc:HGNC:30207]	1	94148988	94275068	-1
ENSG00000276386	-2.72404	0.151349	0.0179326	-9.4351	4.66e-09	2.13e-08	10.9375		CNTNAP3P2	contactin associated protein-like 3 pseudogene 2 [Source:HGNC Symbol;Acc:HGNC:49589]	9	67059560	67293468	1
ENSG00000238105	-2.71705	0.152085	1.1225	-14.6251	1.39e-12	1.36e-11	18.9823	55592	GOLGA2P5	golgin A2 pseudogene 5 [Source:HGNC Symbol;Acc:HGNC:25315]	12	100156357	100173659	-1
ENSG00000188483	-2.7157	0.152227	3.34696	-16.7813	9.33e-14	1.21e-12	21.4654	389792	IER5L	immediate early response 5 like [Source:HGNC Symbol;Acc:HGNC:23679]	9	129175552	129178262	-1
ENSG00000250508	-2.70569	0.153288	0.71984	-11.3342	1.75e-10	1.07e-09	14.1671	105369364	RP11-757G1.6		11	68870664	68874542	1
ENSG00000111885	-2.70454	0.153409	3.21125	-28.5308	1.86e-18	9.08e-17	32.4469	4121	MAN1A1	mannosidase alpha class 1A member 1 [Source:HGNC Symbol;Acc:HGNC:6821]	6	119177209	119349761	-1
ENSG00000267060	-2.70413	0.153453	0.0729157	-9.64582	3.17e-09	1.5e-08	11.318	100885848	PTGES3L	prostaglandin E synthase 3 like [Source:HGNC Symbol;Acc:HGNC:43943]	17	42968088	42980433	-1
ENSG00000185269	-2.70077	0.153811	0.513947	-14.038	3.08e-12	2.79e-11	18.1989	147111	NOTUM	NOTUM, palmitoleoyl-protein carboxylesterase [Source:HGNC Symbol;Acc:HGNC:27106]	17	81952507	81961840	-1
ENSG00000234350	-2.69389	0.154546	0.0758318	-13.0524	1.25e-11	9.85e-11	16.8144		AC007405.4		2	170723086	170770768	-1
ENSG00000133640	-2.69167	0.154784	-0.0813611	-12.6895	2.13e-11	1.59e-10	16.2844	84125	LRRIQ1	leucine rich repeats and IQ motif containing 1 [Source:HGNC Symbol;Acc:HGNC:25708]	12	85036314	85263224	1
ENSG00000135960	-2.68254	0.155767	-0.136629	-10.6234	5.7e-10	3.12e-09	13.0404	10913	EDAR	ectodysplasin A receptor [Source:HGNC Symbol;Acc:HGNC:2895]	2	108894471	108989372	-1
ENSG00000153237	-2.68172	0.155855	-0.423199	-9.71259	2.81e-09	1.34e-08	11.4694	130940	CCDC148	coiled-coil domain containing 148 [Source:HGNC Symbol;Acc:HGNC:25191]	2	158171081	158456753	-1
ENSG00000183798	-2.67783	0.156276	2.27934	-16.5882	1.17e-13	1.5e-12	21.3888	90187	EMILIN3	elastin microfibril interfacer 3 [Source:HGNC Symbol;Acc:HGNC:16123]	20	41359966	41366827	-1
ENSG00000139410	-2.66457	0.15772	-0.894017	-9.45152	4.52e-09	2.07e-08	11.0138	113675	SDSL	serine dehydratase like [Source:HGNC Symbol;Acc:HGNC:30404]	12	113422237	113438276	1
ENSG00000167617	-2.66279	0.157914	1.77568	-14.7661	1.16e-12	1.15e-11	19.1257	148170	CDC42EP5	CDC42 effector protein 5 [Source:HGNC Symbol;Acc:HGNC:17408]	19	54465026	54473264	-1
ENSG00000224729	-2.66023	0.158194	1.95505	-15.4797	4.6e-13	5.01e-12	20.0411	100129845	PCOLCE-AS1	PCOLCE antisense RNA 1 [Source:HGNC Symbol;Acc:HGNC:40430]	7	100589402	100604206	-1
ENSG00000148541	-2.65976	0.158245	0.715879	-14.2181	2.41e-12	2.24e-11	18.4442	220965	FAM13C	family with sequence similarity 13 member C [Source:HGNC Symbol;Acc:HGNC:19371]	10	59246129	59363181	-1
ENSG00000134853	-2.65955	0.158269	2.69461	-13.0791	1.2e-11	9.52e-11	16.6049	5156	PDGFRA	platelet derived growth factor receptor alpha [Source:HGNC Symbol;Acc:HGNC:8803]	4	54229097	54298247	1
ENSG00000184828	-2.65923	0.158304	-0.230947	-10.835	3.99e-10	2.25e-09	13.3967	201501	ZBTB7C	zinc finger and BTB domain containing 7C [Source:HGNC Symbol;Acc:HGNC:31700]	18	48026673	48410752	-1
ENSG00000187323	-2.6549	0.15878	-0.0901474	-9.78312	2.48e-09	1.19e-08	11.5761	1630	DCC	DCC netrin 1 receptor [Source:HGNC Symbol;Acc:HGNC:2701]	18	52340172	53535903	1
ENSG00000154258	-2.65009	0.15931	0.851984	-12.404	3.27e-11	2.34e-10	15.8399	10350	ABCA9	ATP binding cassette subfamily A member 9 [Source:HGNC Symbol;Acc:HGNC:39]	17	68974488	69061064	-1
ENSG00000110400	-2.64626	0.159734	5.02394	-34.485	3.57e-20	2.96e-18	36.3332	5818	NECTIN1	nectin cell adhesion molecule 1 [Source:HGNC Symbol;Acc:HGNC:9706]	11	119623408	119729084	-1
ENSG00000169439	-2.64517	0.159854	6.57509	-46.6316	6.27e-23	1.37e-20	42.6679	6383	SDC2	syndecan 2 [Source:HGNC Symbol;Acc:HGNC:10659]	8	96493351	96611780	1
ENSG00000162543	-2.64373	0.160014	-0.496146	-10.3286	9.45e-10	4.96e-09	12.5488	127733	UBXN10	UBX domain protein 10 [Source:HGNC Symbol;Acc:HGNC:26354]	1	20186085	20196048	1
ENSG00000215004	-2.64264	0.160135	-0.688631	-9.7496	2.63e-09	1.26e-08	11.5438		MESTP4	mesoderm specific transcript pseudogene 4 [Source:HGNC Symbol;Acc:HGNC:38554]	3	29087396	29088599	1
ENSG00000149596	-2.64123	0.160292	-0.630826	-10.5224	6.77e-10	3.64e-09	12.8783	57158	JPH2	junctophilin 2 [Source:HGNC Symbol;Acc:HGNC:14202]	20	44111695	44187578	-1
ENSG00000170962	-2.64029	0.160396	1.6376	-15.5747	4.07e-13	4.49e-12	20.1876	80310	PDGFD	platelet derived growth factor D [Source:HGNC Symbol;Acc:HGNC:30620]	11	103907186	104164379	-1
ENSG00000153012	-2.6392	0.160517	0.673988	-13.6762	5.1e-12	4.4e-11	17.7012	55203	LGI2	leucine rich repeat LGI family member 2 [Source:HGNC Symbol;Acc:HGNC:18710]	4	24998847	25030879	-1
ENSG00000130513	-2.63293	0.161216	0.453291	-10.8747	3.73e-10	2.12e-09	13.4277	9518	GDF15	growth differentiation factor 15 [Source:HGNC Symbol;Acc:HGNC:30142]	19	18374731	18389176	1
ENSG00000181652	-2.63085	0.161449	1.37477	-18.543	1.27e-14	2.04e-13	23.6443	285973	ATG9B	autophagy related 9B [Source:HGNC Symbol;Acc:HGNC:21899]	7	151012209	151024499	-1
ENSG00000139890	-2.6292	0.161634	-0.378812	-10.4899	7.16e-10	3.83e-09	12.8212	161253	REM2	RRAD and GEM like GTPase 2 [Source:HGNC Symbol;Acc:HGNC:20248]	14	22883165	22887686	1
ENSG00000214357	-2.62707	0.161872	2.81092	-23.2131	1.32e-16	3.7e-15	28.1941	54492	NEURL1B	neuralized E3 ubiquitin protein ligase 1B [Source:HGNC Symbol;Acc:HGNC:35422]	5	172641266	172691540	1
ENSG00000189410	-2.61792	0.162903	0.601019	-11.0698	2.7e-10	1.58e-09	13.74	400745	SH2D5	SH2 domain containing 5 [Source:HGNC Symbol;Acc:HGNC:28819]	1	20719732	20732837	-1
ENSG00000206028	-2.61543	0.163184	1.44177	-12.4625	2.99e-11	2.16e-10	15.8713		CTA-373H7.7		22	26667693	26672654	-1
ENSG00000172572	-2.61481	0.163253	1.30486	-16.5259	1.26e-13	1.6e-12	21.3679	5139	PDE3A	phosphodiesterase 3A [Source:HGNC Symbol;Acc:HGNC:8778]	12	20369245	20684381	1
ENSG00000006327	-2.61458	0.163281	1.96746	-17.2207	5.58e-14	7.59e-13	22.1643	51330	TNFRSF12A	TNF receptor superfamily member 12A [Source:HGNC Symbol;Acc:HGNC:18152]	16	3018445	3022383	1
ENSG00000117394	-2.61355	0.163397	6.16127	-31.6912	2.09e-19	1.36e-17	34.3861	6513	SLC2A1	solute carrier family 2 member 1 [Source:HGNC Symbol;Acc:HGNC:11005]	1	42925375	42959173	-1
ENSG00000268050	-2.60523	0.164342	0.984953	-13.424	7.29e-12	6.06e-11	17.3338		RP11-247A12.8		9	129175807	129177575	1
ENSG00000078549	-2.60397	0.164486	1.66324	-18.7957	9.66e-15	1.6e-13	23.9233	117	ADCYAP1R1	ADCYAP receptor type I [Source:HGNC Symbol;Acc:HGNC:242]	7	31052461	31111479	1
ENSG00000005073	-2.60294	0.164602	2.43498	-20.2527	2.14e-15	4.18e-14	25.4158	3207	HOXA11	homeobox A11 [Source:HGNC Symbol;Acc:HGNC:5101]	7	27181510	27185223	-1
ENSG00000150667	-2.60039	0.164894	0.440562	-12.5308	2.7e-11	1.97e-10	16.0512	161835	FSIP1	fibrous sheath interacting protein 1 [Source:HGNC Symbol;Acc:HGNC:21674]	15	39600031	39782830	-1
ENSG00000197822	-2.59734	0.165243	0.920565	-13.433	7.19e-12	6e-11	17.3499	100506658	OCLN	occludin [Source:HGNC Symbol;Acc:HGNC:8104]	5	69492292	69558104	1
ENSG00000240990	-2.59582	0.165417	1.36727	-12.835	1.71e-11	1.31e-10	16.4416	221883	HOXA11-AS	HOXA11 antisense RNA [Source:HGNC Symbol;Acc:HGNC:24957]	7	27184518	27189293	1
ENSG00000104043	-2.59128	0.165939	-0.10543	-9.83395	2.26e-09	1.1e-08	11.6668	79895	ATP8B4	ATPase phospholipid transporting 8B4 (putative) [Source:HGNC Symbol;Acc:HGNC:13536]	15	49858238	50182817	-1
ENSG00000182175	-2.59098	0.165973	4.47728	-30.0794	6.2e-19	3.57e-17	33.4808	56963	RGMA	repulsive guidance molecule family member a [Source:HGNC Symbol;Acc:HGNC:30308]	15	93035273	93089204	-1
ENSG00000259627	-2.58607	0.166538	3.75983	-19.1585	6.57e-15	1.14e-13	24.1015		RP11-244F12.2		15	63070025	63071911	-1
ENSG00000224883	-2.58564	0.166589	-0.616839	-8.89426	1.28e-08	5.35e-08	9.97149		CTA-250D10.19		22	41981304	41982217	-1
ENSG00000253445	-2.58354	0.166831	-0.0506993	-12.7986	1.81e-11	1.38e-10	16.4455		CTB-79E8.2		5	172690454	172697720	-1
ENSG00000171533	-2.57992	0.16725	1.7651	-14.3917	1.91e-12	1.81e-11	18.619	4135	MAP6	microtubule associated protein 6 [Source:HGNC Symbol;Acc:HGNC:6868]	11	75586918	75669120	-1
ENSG00000133985	-2.57688	0.167603	1.58729	-17.8236	2.81e-14	4.13e-13	22.864	23508	TTC9	tetratricopeptide repeat domain 9 [Source:HGNC Symbol;Acc:HGNC:20267]	14	70641787	70675360	1
ENSG00000135547	-2.57458	0.167871	3.6249	-19.962	2.86e-15	5.39e-14	24.9773	23493	HEY2	hes related family bHLH transcription factor with YRPW motif 2 [Source:HGNC Symbol;Acc:HGNC:4881]	6	125747664	125761269	1
ENSG00000113532	-2.57049	0.168347	3.90719	-28.4336	2e-18	9.67e-17	32.3467	7903	ST8SIA4	ST8 alpha-N-acetyl-neuraminide alpha-2,8-sialyltransferase 4 [Source:HGNC Symbol;Acc:HGNC:10871]	5	100806935	100903266	-1
ENSG00000283143	-2.56701	0.168753	3.18024	-21.4917	6.38e-16	1.46e-14	26.5718		AL358113.1	Tight junction protein ZO-2 [Source:UniProtKB/Swiss-Prot;Acc:Q9UDY2]	9	69174373	69248326	1
ENSG00000141665	-2.56603	0.168868	0.293099	-10.2888	1.01e-09	5.29e-09	12.4381	201456	FBXO15	F-box protein 15 [Source:HGNC Symbol;Acc:HGNC:13617]	18	74073353	74147865	-1
ENSG00000172247	-2.56057	0.169508	0.180104	-9.70061	2.87e-09	1.37e-08	11.403	114900	C1QTNF4	C1q and tumor necrosis factor related protein 4 [Source:HGNC Symbol;Acc:HGNC:14346]	11	47589664	47594659	-1
ENSG00000106333	-2.55803	0.169808	3.66878	-24.19	5.65e-17	1.77e-15	28.978	5118	PCOLCE	procollagen C-endopeptidase enhancer [Source:HGNC Symbol;Acc:HGNC:8738]	7	100602177	100608175	1
ENSG00000117643	-2.55676	0.169956	3.68647	-24.0768	6.22e-17	1.92e-15	28.877	57134	MAN1C1	mannosidase alpha class 1C member 1 [Source:HGNC Symbol;Acc:HGNC:19080]	1	25617468	25786207	1
ENSG00000196876	-2.55071	0.170671	5.25502	-26.3788	9.46e-18	3.76e-16	30.5771	6334	SCN8A	sodium voltage-gated channel alpha subunit 8 [Source:HGNC Symbol;Acc:HGNC:10596]	12	51590266	51812864	1
ENSG00000044524	-2.54951	0.170813	3.52532	-28.9245	1.4e-18	7.18e-17	32.7277	2042	EPHA3	EPH receptor A3 [Source:HGNC Symbol;Acc:HGNC:3387]	3	89107524	89482134	1
ENSG00000161896	-2.54776	0.171021	-0.107465	-11.4391	1.48e-10	9.14e-10	14.3762	117283	IP6K3	inositol hexakisphosphate kinase 3 [Source:HGNC Symbol;Acc:HGNC:17269]	6	33721670	33746905	-1
ENSG00000113721	-2.53907	0.172054	3.71454	-24.975	2.93e-17	1.02e-15	29.6408	5159	PDGFRB	platelet derived growth factor receptor beta [Source:HGNC Symbol;Acc:HGNC:8804]	5	150113837	150155872	-1
ENSG00000180616	-2.53725	0.172271	-0.130955	-8.91269	1.24e-08	5.18e-08	9.96709	6752	SSTR2	somatostatin receptor 2 [Source:HGNC Symbol;Acc:HGNC:11331]	17	73165012	73176633	1
ENSG00000008516	-2.53561	0.172466	0.265299	-11.9416	6.65e-11	4.48e-10	15.158	64386	MMP25	matrix metallopeptidase 25 [Source:HGNC Symbol;Acc:HGNC:14246]	16	3046681	3060726	1
ENSG00000172575	-2.53431	0.172623	3.14518	-12.3482	3.55e-11	2.54e-10	15.38	10125	RASGRP1	RAS guanyl releasing protein 1 [Source:HGNC Symbol;Acc:HGNC:9878]	15	38488103	38565575	-1
ENSG00000012171	-2.53307	0.17277	2.15966	-17.1682	5.93e-14	8.02e-13	22.0853	7869 102465526	SEMA3B	semaphorin 3B [Source:HGNC Symbol;Acc:HGNC:10724]	3	50267558	50277546	1
ENSG00000157617	-2.52653	0.173556	1.19553	-12.8228	1.74e-11	1.33e-10	16.4385	25966	C2CD2	C2 calcium dependent domain containing 2 [Source:HGNC Symbol;Acc:HGNC:1266]	21	41885112	41953890	-1
ENSG00000141854	-2.52453	0.173797	0.979306	-9.73314	2.71e-09	1.29e-08	11.3632	113230 102466515	MISP3	MISP family member 3 [Source:HGNC Symbol;Acc:HGNC:26963]	19	14072536	14075062	1
ENSG00000158125	-2.52431	0.173823	-0.113835	-8.68308	1.93e-08	7.8e-08	9.52318	7498	XDH	xanthine dehydrogenase [Source:HGNC Symbol;Acc:HGNC:12805]	2	31334321	31414715	-1
ENSG00000157502	-2.52322	0.173955	3.58706	-28.5935	1.78e-18	8.74e-17	32.4842	139221	MUM1L1	MUM1 like 1 [Source:HGNC Symbol;Acc:HGNC:26583]	X	106168305	106208956	1
ENSG00000185432	-2.52229	0.174066	4.07312	-19.8632	3.17e-15	5.89e-14	24.7908	25840	METTL7A	methyltransferase like 7A [Source:HGNC Symbol;Acc:HGNC:24550]	12	50923472	50932517	1
ENSG00000018625	-2.5209	0.174234	7.66003	-58.568	5.07e-25	2.53e-22	47.5163	477	ATP1A2	ATPase Na+/K+ transporting subunit alpha 2 [Source:HGNC Symbol;Acc:HGNC:800]	1	160115759	160143591	1
ENSG00000188488	-2.51419	0.175047	1.47297	-15.8337	2.95e-13	3.38e-12	20.5194	5104	SERPINA5	serpin family A member 5 [Source:HGNC Symbol;Acc:HGNC:8723]	14	94561442	94593120	1
ENSG00000273604	-2.50799	0.1758	3.93779	-29.4754	9.45e-19	5.13e-17	33.0989	100170841	C17orf96	chromosome 17 open reading frame 96 [Source:HGNC Symbol;Acc:HGNC:34493]	17	38671703	38675421	-1
ENSG00000198354	-2.50598	0.176045	0.339381	-13.2089	9.92e-12	7.99e-11	17.0435	340578	DCAF12L2	DDB1 and CUL4 associated factor 12 like 2 [Source:HGNC Symbol;Acc:HGNC:32950]	X	126163499	126166097	-1
ENSG00000128567	-2.50408	0.176277	2.69421	-14.3668	1.97e-12	1.87e-11	18.4414	5420	PODXL	podocalyxin like [Source:HGNC Symbol;Acc:HGNC:9171]	7	131500262	131558217	-1
ENSG00000138722	-2.50075	0.176685	4.06156	-17.6775	3.31e-14	4.79e-13	22.3743	22915	MMRN1	multimerin 1 [Source:HGNC Symbol;Acc:HGNC:7178]	4	89879532	89954629	1
ENSG00000160963	-2.49662	0.177192	4.52862	-29.6875	8.14e-19	4.49e-17	33.1923	136227	COL26A1	collagen type XXVI alpha 1 chain [Source:HGNC Symbol;Acc:HGNC:18038]	7	101362820	101559024	1
ENSG00000277639	-2.49648	0.177208	-0.499514	-11.2791	1.91e-10	1.16e-09	14.1201	105371267	RP11-467J12.4		16	53035690	53052873	-1
ENSG00000132681	-2.4893	0.178093	0.629619	-12.8973	1.56e-11	1.21e-10	16.5863	480	ATP1A4	ATPase Na+/K+ transporting subunit alpha 4 [Source:HGNC Symbol;Acc:HGNC:14073]	1	160151570	160186977	1
ENSG00000130222	-2.48582	0.178523	0.25935	-8.9864	1.08e-08	4.58e-08	10.0631	10912	GADD45G	growth arrest and DNA damage inducible gamma [Source:HGNC Symbol;Acc:HGNC:4097]	9	89605013	89606555	1
ENSG00000079308	-2.48487	0.178641	3.61366	-16.7945	9.18e-14	1.2e-12	21.4102	7145	TNS1	tensin 1 [Source:HGNC Symbol;Acc:HGNC:11973]	2	217799789	218002995	-1
ENSG00000019549	-2.47874	0.179401	4.89207	-35.5628	1.87e-20	1.67e-18	36.9938	6591	SNAI2	snail family transcriptional repressor 2 [Source:HGNC Symbol;Acc:HGNC:11094]	8	48917690	48921740	-1
ENSG00000196517	-2.47719	0.179594	3.05267	-26.1869	1.1e-17	4.25e-16	30.6736	6536	SLC6A9	solute carrier family 6 member 9 [Source:HGNC Symbol;Acc:HGNC:11056]	1	43991500	44031467	-1
ENSG00000144152	-2.47425	0.17996	2.01287	-17.8927	2.6e-14	3.86e-13	22.9266	129804	FBLN7	fibulin 7 [Source:HGNC Symbol;Acc:HGNC:26740]	2	112138385	112188216	1
ENSG00000226887	-2.47407	0.179983	2.04012	-17.4414	4.33e-14	6.09e-13	22.4111	100288413	ERVMER34-1	endogenous retrovirus group MER34 member 1 [Source:HGNC Symbol;Acc:HGNC:42970]	4	52722618	52751640	-1
ENSG00000254377	-2.47229	0.180205	2.30618	-14.9246	9.39e-13	9.56e-12	19.2625		MIR124-2HG	MIR124-2 host gene [Source:HGNC Symbol;Acc:HGNC:48723]	8	64373328	64383787	1
ENSG00000262655	-2.46946	0.180558	3.29628	-17.1201	6.27e-14	8.45e-13	21.862	10418	SPON1	spondin 1 [Source:HGNC Symbol;Acc:HGNC:11252]	11	13962689	14267884	1
ENSG00000205363	-2.46791	0.180753	1.063	-10.6614	5.34e-10	2.94e-09	12.9937	388135	C15orf59	chromosome 15 open reading frame 59 [Source:HGNC Symbol;Acc:HGNC:33753]	15	73735431	73752747	-1
ENSG00000162490	-2.46306	0.181362	1.75155	-19.5765	4.25e-15	7.67e-14	24.7403	374946	DRAXIN	dorsal inhibitory axon guidance protein [Source:HGNC Symbol;Acc:HGNC:25054]	1	11691729	11725857	1
ENSG00000182492	-2.46177	0.181524	3.19835	-18.1163	2.02e-14	3.1e-13	23.0381	633	BGN	biglycan [Source:HGNC Symbol;Acc:HGNC:1044]	X	153494939	153509554	1
ENSG00000111052	-2.45781	0.182023	3.51655	-25.6473	1.69e-17	6.25e-16	30.2133	8825	LIN7A	lin-7 homolog A, crumbs cell polarity complex component [Source:HGNC Symbol;Acc:HGNC:17787]	12	80792520	80937925	-1
ENSG00000211445	-2.45719	0.182101	2.29211	-20.3831	1.87e-15	3.76e-14	25.5501	2878	GPX3	glutathione peroxidase 3 [Source:HGNC Symbol;Acc:HGNC:4555]	5	151020438	151028993	1
ENSG00000165300	-2.4559	0.182264	4.6697	-41.7029	6.6e-22	9.94e-20	40.3788	26050	SLITRK5	SLIT and NTRK like family member 5 [Source:HGNC Symbol;Acc:HGNC:20295]	13	87672615	87696272	1
ENSG00000182310	-2.45176	0.182788	0.729932	-12.2555	4.1e-11	2.88e-10	15.617	147650	SPACA6	sperm acrosome associated 6 [Source:HGNC Symbol;Acc:HGNC:27113]	19	51693340	51712387	1
ENSG00000119139	-2.45117	0.182862	3.80465	-21.8147	4.71e-16	1.13e-14	26.789	9414	TJP2	tight junction protein 2 [Source:HGNC Symbol;Acc:HGNC:11828]	9	69121264	69255208	1
ENSG00000176845	-2.4495	0.183074	1.91296	-16.3874	1.49e-13	1.86e-12	21.1715	284207	METRNL	meteorin like, glial cell differentiation regulator [Source:HGNC Symbol;Acc:HGNC:27584]	17	83079691	83095119	1
ENSG00000259954	-2.44419	0.183749	0.353526	-11.2256	2.09e-10	1.25e-09	14.0114	283888	IL21R-AS1	IL21R antisense RNA 1 [Source:HGNC Symbol;Acc:HGNC:27551]	16	27447669	27453393	-1
ENSG00000167191	-2.43879	0.184438	4.21759	-29.6072	8.61e-19	4.74e-17	33.1659	51704	GPRC5B	G protein-coupled receptor class C group 5 member B [Source:HGNC Symbol;Acc:HGNC:13308]	16	19856691	19886167	-1
ENSG00000145087	-2.43573	0.184829	2.82973	-24.3001	5.15e-17	1.64e-15	29.1337	9515	STXBP5L	syntaxin binding protein 5 like [Source:HGNC Symbol;Acc:HGNC:30757]	3	120908072	121424761	1
ENSG00000168672	-2.43422	0.185023	4.20594	-19.9548	2.88e-15	5.42e-14	24.8556	157638	FAM84B	family with sequence similarity 84 member B [Source:HGNC Symbol;Acc:HGNC:24166]	8	126552442	126558393	-1
ENSG00000139880	-2.4331	0.185168	3.72342	-24.506	4.33e-17	1.42e-15	29.2368	64403	CDH24	cadherin 24 [Source:HGNC Symbol;Acc:HGNC:14265]	14	23047062	23057538	-1
ENSG00000125430	-2.43164	0.185355	3.8524	-33.3778	7.06e-20	5.28e-18	35.7115	9953	HS3ST3B1	heparan sulfate-glucosamine 3-sulfotransferase 3B1 [Source:HGNC Symbol;Acc:HGNC:5198]	17	14301083	14349404	1
ENSG00000200997	-2.42952	0.185627	0.721798	-14.055	3.01e-12	2.74e-11	18.2221		RNU1-85P	RNA, U1 small nuclear 85, pseudogene [Source:HGNC Symbol;Acc:HGNC:48427]	17	58679527	58679690	-1
ENSG00000183160	-2.42912	0.185678	-0.523769	-7.70399	1.36e-07	4.72e-07	7.60524	338773	TMEM119	transmembrane protein 119 [Source:HGNC Symbol;Acc:HGNC:27884]	12	108589846	108598320	-1
ENSG00000133019	-2.42639	0.18603	1.80154	-15.7268	3.37e-13	3.79e-12	20.3613	1131	CHRM3	cholinergic receptor muscarinic 3 [Source:HGNC Symbol;Acc:HGNC:1952]	1	239386565	239915452	1
ENSG00000144724	-2.4238	0.186364	6.6743	-48.167	3.16e-23	7.69e-21	43.3528	5793	PTPRG	protein tyrosine phosphatase, receptor type G [Source:HGNC Symbol;Acc:HGNC:9671]	3	61561569	62297613	1
ENSG00000064309	-2.42219	0.186572	6.20202	-60.5497	2.5e-25	1.49e-22	48.2486	50937	CDON	cell adhesion associated, oncogene regulated [Source:HGNC Symbol;Acc:HGNC:17104]	11	125955796	126063335	-1
ENSG00000250927	-2.41948	0.186923	2.09149	-19.0369	7.47e-15	1.28e-13	24.172		MESTP3	mesoderm specific transcript pseudogene 3 [Source:HGNC Symbol;Acc:HGNC:38553]	4	28823244	28824211	-1
ENSG00000204055	-2.41411	0.187621	1.6269	-9.76871	2.54e-09	1.22e-08	11.3119		RP11-247A12.2		9	129176771	129210548	1
ENSG00000239887	-2.41255	0.187824	1.20096	-13.7365	4.69e-12	4.08e-11	17.758	400793	C1orf226	chromosome 1 open reading frame 226 [Source:HGNC Symbol;Acc:HGNC:34351]	1	162366908	162386818	1
ENSG00000270607	-2.4113	0.187986	-0.732799	-8.69322	1.89e-08	7.66e-08	9.59169		RP11-359E10.1		11	19710934	19712619	-1
ENSG00000271474	-2.4091	0.188273	0.831508	-15.7868	3.12e-13	3.55e-12	20.4679		RP11-710C12.1		4	95549129	95552457	1
ENSG00000133816	-2.40712	0.188532	1.89961	-11.4056	1.56e-10	9.61e-10	14.1099	9645	MICAL2	microtubule associated monooxygenase, calponin and LIM domain containing 2 [Source:HGNC Symbol;Acc:HGNC:24693]	11	12094008	12263789	1
ENSG00000103522	-2.40578	0.188707	1.42372	-16.1733	1.94e-13	2.31e-12	20.9388	50615	IL21R	interleukin 21 receptor [Source:HGNC Symbol;Acc:HGNC:6006]	16	27402162	27452042	1
ENSG00000241956	-2.40547	0.188747	-0.232378	-9.00305	1.04e-08	4.45e-08	10.144	102546299	CTC-340A15.2		5	164296696	165171643	1
ENSG00000248890	-2.39821	0.1897	3.21285	-25.5252	1.87e-17	6.87e-16	30.1346	646576	HHIP-AS1	HHIP antisense RNA 1 [Source:HGNC Symbol;Acc:HGNC:44182]	4	144642922	144661357	-1
ENSG00000246763	-2.39792	0.189737	3.3345	-17.9948	2.32e-14	3.49e-13	22.8722	503569	RGMB-AS1	RGMB antisense RNA 1 [Source:HGNC Symbol;Acc:HGNC:48666]	5	98769618	98773469	-1
ENSG00000072195	-2.39694	0.189867	1.60292	-14.8128	1.09e-12	1.09e-11	19.195	10290 100996693	SPEG	SPEG complex locus [Source:HGNC Symbol;Acc:HGNC:16901]	2	219434846	219498287	1
ENSG00000131669	-2.38795	0.191054	2.245	-21.8618	4.5e-16	1.09e-14	26.9758	4814	NINJ1	ninjurin 1 [Source:HGNC Symbol;Acc:HGNC:7824]	9	93121489	93134288	-1
ENSG00000128833	-2.38768	0.19109	1.33952	-12.4575	3.01e-11	2.18e-10	15.8663	55930	MYO5C	myosin VC [Source:HGNC Symbol;Acc:HGNC:7604]	15	52192322	52295798	-1
ENSG00000122877	-2.38728	0.191143	1.62682	-13.066	1.22e-11	9.67e-11	16.7453	1959	EGR2	early growth response 2 [Source:HGNC Symbol;Acc:HGNC:3239]	10	62811996	62919900	-1
ENSG00000258944	-2.38586	0.19133	0.502803	-8.99977	1.05e-08	4.47e-08	10.0534		RP4-647C14.3		14	73272182	73274081	-1
ENSG00000135549	-2.37914	0.192224	0.925442	-11.6262	1.09e-10	6.96e-10	14.6087	5570	PKIB	protein kinase (cAMP-dependent, catalytic) inhibitor beta [Source:HGNC Symbol;Acc:HGNC:9018]	6	122471917	122726373	1
ENSG00000204516	-2.37398	0.192913	1.75737	-15.6502	3.71e-13	4.13e-12	20.2661	4277	MICB	MHC class I polypeptide-related sequence B [Source:HGNC Symbol;Acc:HGNC:7091]	6	31494881	31511124	1
ENSG00000168918	-2.37392	0.192921	0.435246	-10.7038	4.97e-10	2.75e-09	13.1328	3635	INPP5D	inositol polyphosphate-5-phosphatase D [Source:HGNC Symbol;Acc:HGNC:6079]	2	233059967	233207903	1
ENSG00000169242	-2.37036	0.193398	0.289064	-9.88672	2.06e-09	1.01e-08	11.7218	1942	EFNA1	ephrin A1 [Source:HGNC Symbol;Acc:HGNC:3221]	1	155127460	155134857	1
ENSG00000180758	-2.37019	0.19342	2.7174	-21.3066	7.61e-16	1.71e-14	26.4304	80045	GPR157	G protein-coupled receptor 157 [Source:HGNC Symbol;Acc:HGNC:23687]	1	9100305	9129170	-1
ENSG00000135454	-2.36446	0.19419	3.16373	-24.5987	4e-17	1.33e-15	29.3686	2583	B4GALNT1	beta-1,4-N-acetyl-galactosaminyltransferase 1 [Source:HGNC Symbol;Acc:HGNC:4117]	12	57623410	57633355	-1
ENSG00000269473	-2.3643	0.194212	0.0771309	-9.98085	1.74e-09	8.66e-09	11.9091		CTD-2619J13.19		19	58440448	58445849	1
ENSG00000225783	-2.3635	0.194319	3.51145	-15.7555	3.25e-13	3.67e-12	20.1208	440823	MIAT	myocardial infarction associated transcript (non-protein coding) [Source:HGNC Symbol;Acc:HGNC:33425]	22	26646428	26676475	1
ENSG00000248690	-2.36178	0.194552	1.97072	-16.368	1.53e-13	1.89e-12	21.1397		HAS2-AS1	HAS2 antisense RNA 1 [Source:HGNC Symbol;Acc:HGNC:34340]	8	121639293	121644693	1
ENSG00000151617	-2.36053	0.19472	3.29522	-27.7402	3.33e-18	1.49e-16	31.8618	1909	EDNRA	endothelin receptor type A [Source:HGNC Symbol;Acc:HGNC:3179]	4	147480917	147544954	1
ENSG00000110436	-2.35912	0.19491	0.796778	-9.66663	3.05e-09	1.44e-08	11.259	6506	SLC1A2	solute carrier family 1 member 2 [Source:HGNC Symbol;Acc:HGNC:10940]	11	35251206	35420063	-1
ENSG00000232445	-2.3574	0.195143	0.0661807	-10.5628	6.32e-10	3.43e-09	12.9224	101927746	RP11-132A1.4		7	101308346	101310985	1
ENSG00000197415	-2.35673	0.195234	0.556023	-9.72256	2.76e-09	1.32e-08	11.3934	79674	VEPH1	ventricular zone expressed PH domain containing 1 [Source:HGNC Symbol;Acc:HGNC:25735]	3	157259742	157533619	-1
ENSG00000170961	-2.35206	0.195866	5.81523	-37.7543	5.34e-21	5.96e-19	38.1787	3037	HAS2	hyaluronan synthase 2 [Source:HGNC Symbol;Acc:HGNC:4819]	8	121612116	121641390	-1
ENSG00000181201	-2.34795	0.196425	0.219788	-10.7918	4.29e-10	2.41e-09	13.2987		HIST3H2BA	histone cluster 3, H2ba (pseudogene) [Source:HGNC Symbol;Acc:HGNC:20515]	1	228464103	228464626	-1
ENSG00000126705	-2.34784	0.19644	4.01922	-25.0152	2.83e-17	9.94e-16	29.6265	27245	AHDC1	AT-hook DNA binding motif containing 1 [Source:HGNC Symbol;Acc:HGNC:25230]	1	27534035	27604431	-1
ENSG00000120594	-2.34405	0.196957	1.39206	-13.2828	8.92e-12	7.26e-11	17.0894	84898	PLXDC2	plexin domain containing 2 [Source:HGNC Symbol;Acc:HGNC:21013]	10	19816239	20289856	1
ENSG00000095203	-2.34236	0.197187	-0.0408184	-10.3021	9.9e-10	5.17e-09	12.481	54566	EPB41L4B	erythrocyte membrane protein band 4.1 like 4B [Source:HGNC Symbol;Acc:HGNC:19818]	9	109171975	109320964	-1
ENSG00000135439	-2.34172	0.197275	1.97699	-13.7923	4.33e-12	3.81e-11	17.7462	116986	AGAP2	ArfGAP with GTPase domain, ankyrin repeat and PH domain 2 [Source:HGNC Symbol;Acc:HGNC:16921]	12	57723761	57742157	-1
ENSG00000157404	-2.33855	0.197708	3.28986	-21.992	3.99e-16	9.79e-15	27.0254	3815	KIT	KIT proto-oncogene receptor tyrosine kinase [Source:HGNC Symbol;Acc:HGNC:6342]	4	54657918	54740715	1
ENSG00000131951	-2.3328	0.198499	1.09737	-12.8252	1.74e-11	1.33e-10	16.4448		LRRC9	leucine rich repeat containing 9 [Source:HGNC Symbol;Acc:HGNC:19848]	14	59919713	60063559	1
ENSG00000221955	-2.33237	0.198558	-0.449656	-8.61531	2.2e-08	8.8e-08	9.41793	84561	SLC12A8	solute carrier family 12 member 8 [Source:HGNC Symbol;Acc:HGNC:15595]	3	125082636	125212864	-1
ENSG00000235447	-2.33031	0.198841	-0.0132859	-9.5457	3.81e-09	1.77e-08	11.1323		TRAPPC13P1	trafficking protein particle complex 13 pseudogene 1 [Source:HGNC Symbol;Acc:HGNC:50347]	X	76655498	76656559	-1
ENSG00000273049	-2.32746	0.199235	2.27405	-19.4299	4.94e-15	8.83e-14	24.5746		RP11-834C11.12		12	53985845	54034888	1
ENSG00000140416	-2.32623	0.199404	6.16202	-26.9705	5.98e-18	2.5e-16	30.9035	7168	TPM1	tropomyosin 1 (alpha) [Source:HGNC Symbol;Acc:HGNC:12010]	15	63042632	63071915	1
ENSG00000168016	-2.32327	0.199815	0.232305	-10.014	1.64e-09	8.23e-09	11.9534	9881	TRANK1	tetratricopeptide repeat and ankyrin repeat containing 1 [Source:HGNC Symbol;Acc:HGNC:29011]	3	36826820	36945057	-1
ENSG00000258749	-2.31947	0.200341	2.74194	-19.1406	6.69e-15	1.16e-13	24.2243		RP11-688G15.3		14	99512501	99513576	1
ENSG00000270823	-2.31601	0.200822	4.75221	-44.7892	1.47e-22	2.75e-20	41.8814		RP11-2E11.6		7	130495794	130498427	-1
ENSG00000177679	-2.30971	0.201701	-0.749852	-8.91166	1.24e-08	5.19e-08	10.007	222183	SRRM3	serine/arginine repetitive matrix 3 [Source:HGNC Symbol;Acc:HGNC:26729]	7	76201900	76287288	1
ENSG00000254706	-2.30859	0.201858	-0.517529	-8.53691	2.56e-08	1.01e-07	9.27132		RP11-565P22.6		1	162365407	162383531	1
ENSG00000163618	-2.30626	0.202183	-0.210786	-8.63718	2.11e-08	8.45e-08	9.43749	8618	CADPS	calcium dependent secretion activator [Source:HGNC Symbol;Acc:HGNC:1426]	3	62398346	62875389	-1
ENSG00000173638	-2.30434	0.202453	4.71498	-35.7259	1.7e-20	1.54e-18	37.0997	6573	SLC19A1	solute carrier family 19 member 1 [Source:HGNC Symbol;Acc:HGNC:10937]	21	45493572	45544411	-1
ENSG00000198353	-2.30394	0.202509	2.76287	-20.882	1.15e-15	2.44e-14	26.0106	3221	HOXC4	homeobox C4 [Source:HGNC Symbol;Acc:HGNC:5126]	12	54016931	54056030	1
ENSG00000251151	-2.30213	0.202764	2.75174	-21.3439	7.34e-16	1.65e-14	26.4616	100874365	HOXC-AS3	HOXC cluster antisense RNA 3 [Source:HGNC Symbol;Acc:HGNC:43751]	12	53981509	53985519	-1
ENSG00000205090	-2.30045	0.202999	-0.0545069	-8.78567	1.58e-08	6.49e-08	9.70815	339453	TMEM240	transmembrane protein 240 [Source:HGNC Symbol;Acc:HGNC:25186]	1	1535174	1540453	-1
ENSG00000073756	-2.29198	0.204195	0.329808	-10.0759	1.47e-09	7.45e-09	12.0521	5743	PTGS2	prostaglandin-endoperoxide synthase 2 [Source:HGNC Symbol;Acc:HGNC:9605]	1	186671791	186680427	-1
ENSG00000165169	-2.28875	0.204653	2.40366	-20.3394	1.96e-15	3.9e-14	25.4978	6990	DYNLT3	dynein light chain Tctex-type 3 [Source:HGNC Symbol;Acc:HGNC:11694]	X	37836757	37847637	-1
ENSG00000187720	-2.28676	0.204935	1.37884	-12.5616	2.57e-11	1.89e-10	16.016	79875	THSD4	thrombospondin type 1 domain containing 4 [Source:HGNC Symbol;Acc:HGNC:25835]	15	71096952	71783383	1
ENSG00000260641	-2.28594	0.205052	0.132114	-9.90432	1.99e-09	9.8e-09	11.7662		RP11-1299A16.3		4	98658904	98664550	1
ENSG00000183579	-2.27965	0.205948	5.26999	-39.9371	1.64e-21	2.19e-19	39.4291	84133	ZNRF3	zinc and ring finger 3 [Source:HGNC Symbol;Acc:HGNC:18126]	22	28883592	29057487	1
ENSG00000106484	-2.26825	0.207581	7.29447	-60.5781	2.48e-25	1.49e-22	48.2454	4232	MEST	mesoderm specific transcript [Source:HGNC Symbol;Acc:HGNC:7028]	7	130486171	130506296	1
ENSG00000023892	-2.26638	0.207851	0.4753	-10.8971	3.59e-10	2.05e-09	13.453	50619	DEF6	DEF6, guanine nucleotide exchange factor [Source:HGNC Symbol;Acc:HGNC:2760]	6	35297852	35321771	1
ENSG00000026559	-2.26578	0.207937	1.53295	-14.5445	1.55e-12	1.51e-11	18.8377	3755	KCNG1	potassium voltage-gated channel modifier subfamily G member 1 [Source:HGNC Symbol;Acc:HGNC:6248]	20	51003656	51023129	-1
ENSG00000025039	-2.26337	0.208284	2.88161	-14.8994	9.71e-13	9.83e-12	19.1159	58528	RRAGD	Ras related GTP binding D [Source:HGNC Symbol;Acc:HGNC:19903]	6	89364636	89412270	-1
ENSG00000164199	-2.26273	0.208378	5.87464	-35.8824	1.55e-20	1.44e-18	37.0748	84059	ADGRV1	adhesion G protein-coupled receptor V1 [Source:HGNC Symbol;Acc:HGNC:17416]	5	90529344	91164221	1
ENSG00000040608	-2.26201	0.208481	1.28338	-11.4852	1.37e-10	8.55e-10	14.3315	65078	RTN4R	reticulon 4 receptor [Source:HGNC Symbol;Acc:HGNC:18601]	22	20241415	20283246	-1
ENSG00000232358	-2.25606	0.209343	-0.281162	-7.69425	1.39e-07	4.8e-07	7.54982		RP5-955M13.4		20	50999370	51010019	1
ENSG00000171004	-2.25557	0.209414	4.28682	-29.5685	8.85e-19	4.85e-17	33.1231	90161	HS6ST2	heparan sulfate 6-O-sulfotransferase 2 [Source:HGNC Symbol;Acc:HGNC:19133]	X	132626016	132961395	-1
ENSG00000198879	-2.24751	0.210587	3.40874	-26.2594	1.04e-17	4.07e-16	30.7086	57713	SFMBT2	Scm-like with four mbt domains 2 [Source:HGNC Symbol;Acc:HGNC:20256]	10	7158624	7411486	-1
ENSG00000104059	-2.24324	0.211211	3.30487	-18.7068	1.06e-14	1.74e-13	23.6653	23359	FAM189A1	family with sequence similarity 189 member A1 [Source:HGNC Symbol;Acc:HGNC:29075]	15	29120254	29570723	-1
ENSG00000100218	-2.24244	0.211329	0.261825	-9.95931	1.81e-09	8.97e-09	11.8503	27156	RSPH14	radial spoke head 14 homolog [Source:HGNC Symbol;Acc:HGNC:13437]	22	23059415	23145021	-1
ENSG00000240694	-2.23792	0.211992	4.07435	-20.2171	2.21e-15	4.32e-14	25.1377	10687	PNMA2	paraneoplastic Ma antigen 2 [Source:HGNC Symbol;Acc:HGNC:9159]	8	26504686	26514092	-1
ENSG00000008283	-2.23669	0.212172	2.09137	-17.2451	5.42e-14	7.41e-13	22.1716	1534	CYB561	cytochrome b561 [Source:HGNC Symbol;Acc:HGNC:2571]	17	63432304	63446378	-1
ENSG00000111110	-2.23536	0.212368	4.12617	-17.8129	2.84e-14	4.17e-13	22.4959	57460	PPM1H	protein phosphatase, Mg2+/Mn2+ dependent 1H [Source:HGNC Symbol;Acc:HGNC:18583]	12	62643982	62935037	-1
ENSG00000174482	-2.23228	0.212823	0.471333	-6.6089	1.42e-06	4.1e-06	5.09145	158038	LINGO2	leucine rich repeat and Ig domain containing 2 [Source:HGNC Symbol;Acc:HGNC:21207]	9	27948078	28670286	-1
ENSG00000137691	-2.22878	0.213339	-0.102032	-10.4338	7.88e-10	4.19e-09	12.7098	85016	C11orf70	chromosome 11 open reading frame 70 [Source:HGNC Symbol;Acc:HGNC:28188]	11	102047443	102084560	1
ENSG00000005379	-2.22374	0.214085	0.455895	-11.2007	2.18e-10	1.3e-09	13.9576	9256	TSPOAP1	TSPO associated protein 1 [Source:HGNC Symbol;Acc:HGNC:16831]	17	58301228	58328760	-1
ENSG00000137872	-2.22372	0.214089	2.87758	-11.4841	1.37e-10	8.57e-10	14.0217	80031	SEMA6D	semaphorin 6D [Source:HGNC Symbol;Acc:HGNC:16770]	15	47184101	47774223	1
ENSG00000138741	-2.22103	0.214488	0.425544	-9.00633	1.04e-08	4.42e-08	10.0687	7222	TRPC3	transient receptor potential cation channel subfamily C member 3 [Source:HGNC Symbol;Acc:HGNC:12335]	4	121879027	121951754	-1
ENSG00000130600	-2.21576	0.215273	0.826703	-8.55951	2.45e-08	9.72e-08	9.13648	283120 100033819 102724852	H19	H19, imprinted maternally expressed transcript (non-protein coding) [Source:HGNC Symbol;Acc:HGNC:4713]	11	1995163	2001470	-1
ENSG00000148082	-2.21204	0.215828	4.33043	-28.162	2.44e-18	1.15e-16	32.0827	53358	SHC3	SHC adaptor protein 3 [Source:HGNC Symbol;Acc:HGNC:18181]	9	89005771	89178767	-1
ENSG00000145247	-2.20531	0.216838	1.39652	-13.4203	7.33e-12	6.09e-11	17.2823	132299	OCIAD2	OCIA domain containing 2 [Source:HGNC Symbol;Acc:HGNC:28685]	4	48885019	48906937	-1
ENSG00000220884	-2.20459	0.216947	5.20826	-34.8332	2.89e-20	2.46e-18	36.5082		MESTP1	mesoderm specific transcript pseudogene 1 [Source:HGNC Symbol;Acc:HGNC:29660]	6	128928995	128929988	-1
ENSG00000107281	-2.20354	0.217105	0.914638	-12.5118	2.77e-11	2.02e-10	15.9864	56654	NPDC1	neural proliferation, differentiation and control 1 [Source:HGNC Symbol;Acc:HGNC:7899]	9	137039470	137046203	-1
ENSG00000083444	-2.19898	0.217792	5.47269	-42.9851	3.49e-22	5.75e-20	40.9828	5351	PLOD1	procollagen-lysine,2-oxoglutarate 5-dioxygenase 1 [Source:HGNC Symbol;Acc:HGNC:9081]	1	11934205	11975538	1
ENSG00000136531	-2.19752	0.218012	0.493853	-9.05172	9.52e-09	4.09e-08	10.1449	6326	SCN2A	sodium voltage-gated channel alpha subunit 2 [Source:HGNC Symbol;Acc:HGNC:10588]	2	165239372	165392732	1
ENSG00000100167	-2.196	0.218242	3.57191	-22.5595	2.37e-16	6.17e-15	27.5114	55964	2003-09-01	septin 3 [Source:HGNC Symbol;Acc:HGNC:10750]	22	41976272	41998221	1
ENSG00000267026	-2.19236	0.218793	0.352553	-9.59184	3.5e-09	1.64e-08	11.1734	102724684	RP11-92C4.3		9	98847172	98872415	-1
ENSG00000077238	-2.18749	0.219533	3.58536	-15.6135	3.88e-13	4.3e-12	19.9073	3566	IL4R	interleukin 4 receptor [Source:HGNC Symbol;Acc:HGNC:6015]	16	27313668	27364778	1
ENSG00000187678	-2.18691	0.219621	6.948	-21.7792	4.86e-16	1.16e-14	26.2397	81848	SPRY4	sprouty RTK signaling antagonist 4 [Source:HGNC Symbol;Acc:HGNC:15533]	5	142310427	142326455	-1
ENSG00000159184	-2.18651	0.219682	1.86843	-14.5291	1.58e-12	1.54e-11	18.777	10481	HOXB13	homeobox B13 [Source:HGNC Symbol;Acc:HGNC:5112]	17	48724763	48729178	-1
ENSG00000151632	-2.18172	0.220412	1.09218	-9.57833	3.59e-09	1.68e-08	11.0415	1645 1646	AKR1C2	aldo-keto reductase family 1 member C2 [Source:HGNC Symbol;Acc:HGNC:385]	10	4987400	5018031	-1
ENSG00000187595	-2.18099	0.220524	2.45763	-16.964	7.52e-14	9.95e-13	21.7951	201181	ZNF385C	zinc finger protein 385C [Source:HGNC Symbol;Acc:HGNC:33722]	17	42025576	42098479	-1
ENSG00000151322	-2.17941	0.220767	1.23155	-13.2432	9.44e-12	7.63e-11	17.0422	64067	NPAS3	neuronal PAS domain protein 3 [Source:HGNC Symbol;Acc:HGNC:19311]	14	32934933	33804176	1
ENSG00000138798	-2.17699	0.221137	0.847855	-11.5134	1.31e-10	8.2e-10	14.4279	1950	EGF	epidermal growth factor [Source:HGNC Symbol;Acc:HGNC:3229]	4	109912884	110012266	1
ENSG00000255201	-2.1763	0.221242	1.86637	-16.0166	2.35e-13	2.76e-12	20.7101		RP11-350N15.4		8	38421889	38426096	1
ENSG00000254088	-2.17464	0.221497	2.6222	-16.3216	1.62e-13	1.99e-12	20.9894		SLC2A3P4	solute carrier family 2 member 3 pseudogene 4 [Source:HGNC Symbol;Acc:HGNC:31076]	8	86503591	86505061	1
ENSG00000164023	-2.17347	0.221676	1.02509	-11.7618	8.82e-11	5.75e-10	14.8071	166929	SGMS2	sphingomyelin synthase 2 [Source:HGNC Symbol;Acc:HGNC:28395]	4	107824563	107915047	1
ENSG00000138639	-2.1731	0.221734	1.64235	-14.5653	1.51e-12	1.47e-11	18.8516	83478	ARHGAP24	Rho GTPase activating protein 24 [Source:HGNC Symbol;Acc:HGNC:25361]	4	85475114	86002670	1
ENSG00000146072	-2.17109	0.222043	6.07795	-29.2116	1.14e-18	6.06e-17	32.6198	27242	TNFRSF21	TNF receptor superfamily member 21 [Source:HGNC Symbol;Acc:HGNC:13469]	6	47231532	47309905	-1
ENSG00000145687	-2.16805	0.222511	5.44038	-38.5626	3.42e-21	4.11e-19	38.6615	23635	SSBP2	single stranded DNA binding protein 2 [Source:HGNC Symbol;Acc:HGNC:15831]	5	81413021	81751797	-1
ENSG00000111371	-2.16797	0.222523	7.35725	-55.3616	1.67e-24	6.6e-22	46.3124	81539	SLC38A1	solute carrier family 38 member 1 [Source:HGNC Symbol;Acc:HGNC:13447]	12	46183063	46270017	-1
ENSG00000162755	-2.1679	0.222534	-0.119264	-9.02571	1e-08	4.27e-08	10.1698	126823	KLHDC9	kelch domain containing 9 [Source:HGNC Symbol;Acc:HGNC:28489]	1	161098361	161100346	1
ENSG00000189056	-2.16523	0.222947	2.29333	-11.1966	2.19e-10	1.31e-09	13.6675	5649	RELN	reelin [Source:HGNC Symbol;Acc:HGNC:9957]	7	103471784	103989516	-1
ENSG00000011465	-2.16042	0.223691	-0.0578136	-7.19017	4.01e-07	1.28e-06	6.45123	1634	DCN	decorin [Source:HGNC Symbol;Acc:HGNC:2705]	12	91140484	91183123	-1
ENSG00000178075	-2.15874	0.223952	0.663221	-12.5904	2.47e-11	1.82e-10	16.1233	54762	GRAMD1C	GRAM domain containing 1C [Source:HGNC Symbol;Acc:HGNC:25252]	3	113828182	113947174	1
ENSG00000058091	-2.15818	0.224038	5.63155	-31.9462	1.77e-19	1.18e-17	34.5993	5218	CDK14	cyclin dependent kinase 14 [Source:HGNC Symbol;Acc:HGNC:8883]	7	90466424	91210590	1
ENSG00000165152	-2.15012	0.225294	4.3177	-27.3739	4.39e-18	1.89e-16	31.4793	84302	TMEM246	transmembrane protein 246 [Source:HGNC Symbol;Acc:HGNC:28180]	9	101473171	101533537	-1
ENSG00000170500	-2.14839	0.225563	2.34515	-14.804	1.1e-12	1.1e-11	19.0753	164832	LONRF2	LON peptidase N-terminal domain and ring finger 2 [Source:HGNC Symbol;Acc:HGNC:24788]	2	100273291	100322733	-1
ENSG00000148408	-2.14751	0.225703	-0.288558	-9.13026	8.22e-09	3.57e-08	10.3819	774	CACNA1B	calcium voltage-gated channel subunit alpha1 B [Source:HGNC Symbol;Acc:HGNC:1389]	9	137877789	138124624	1
ENSG00000188573	-2.14649	0.225861	0.650099	-9.42274	4.77e-09	2.18e-08	10.8202		FBLL1	fibrillarin-like 1 [Source:HGNC Symbol;Acc:HGNC:35458]	5	168529116	168530634	1
ENSG00000125246	-2.14342	0.226342	3.7603	-11.9841	6.23e-11	4.22e-10	14.6182	171425	CLYBL	citrate lyase beta like [Source:HGNC Symbol;Acc:HGNC:18355]	13	99606669	99897134	1
ENSG00000153246	-2.14178	0.226599	0.523277	-12.6428	2.28e-11	1.69e-10	16.2093	22925	PLA2R1	phospholipase A2 receptor 1 [Source:HGNC Symbol;Acc:HGNC:9042]	2	159932006	160062610	-1
ENSG00000168000	-2.13989	0.226897	5.69719	-45.0705	1.28e-22	2.49e-20	41.9794	26580	BSCL2	BSCL2, seipin lipid droplet biogenesis associated [Source:HGNC Symbol;Acc:HGNC:15832]	11	62690275	62709845	-1
ENSG00000132849	-2.13426	0.227784	2.60995	-13.9869	3.31e-12	2.98e-11	17.9007	10207	PATJ	PATJ, crumbs cell polarity complex component [Source:HGNC Symbol;Acc:HGNC:28881]	1	61742477	62178675	1
ENSG00000131378	-2.13376	0.227863	2.57627	-16.4272	1.42e-13	1.78e-12	21.1248	23180	RFTN1	raftlin, lipid raft linker 1 [Source:HGNC Symbol;Acc:HGNC:30278]	3	16313574	16514026	-1
ENSG00000137642	-2.13205	0.228134	2.50265	-15.4138	5e-13	5.42e-12	19.8554	6653	SORL1	sortilin related receptor 1 [Source:HGNC Symbol;Acc:HGNC:11185]	11	121452203	121633693	1
ENSG00000147100	-2.12422	0.229375	4.74339	-38.7375	3.11e-21	3.79e-19	38.8115	6567	SLC16A2	solute carrier family 16 member 2 [Source:HGNC Symbol;Acc:HGNC:10923]	X	74421461	74533917	1
ENSG00000119514	-2.12301	0.229567	1.95563	-13.7927	4.33e-12	3.81e-11	17.7382	79695	GALNT12	polypeptide N-acetylgalactosaminyltransferase 12 [Source:HGNC Symbol;Acc:HGNC:19877]	9	98807699	98850081	1
ENSG00000178764	-2.12135	0.229832	3.42835	-24.4443	4.56e-17	1.48e-15	29.2043	22882	ZHX2	zinc fingers and homeoboxes 2 [Source:HGNC Symbol;Acc:HGNC:18513]	8	122781394	122974512	1
ENSG00000064393	-2.11384	0.231031	5.31732	-37.1649	7.43e-21	7.97e-19	37.8802	28996	HIPK2	homeodomain interacting protein kinase 2 [Source:HGNC Symbol;Acc:HGNC:14402]	7	139561570	139777778	-1
ENSG00000182326	-2.11334	0.231112	2.21579	-17.5438	3.85e-14	5.46e-13	22.501	716	C1S	complement component 1, s subcomponent [Source:HGNC Symbol;Acc:HGNC:1247]	12	6988259	7071032	1
ENSG00000058668	-2.10943	0.231739	5.75347	-25.2097	2.41e-17	8.64e-16	29.5024	493	ATP2B4	ATPase plasma membrane Ca2+ transporting 4 [Source:HGNC Symbol;Acc:HGNC:817]	1	203626561	203744081	1
ENSG00000152154	-2.1094	0.231744	1.28868	-13.9317	3.57e-12	3.19e-11	18.0155	130733	TMEM178A	transmembrane protein 178A [Source:HGNC Symbol;Acc:HGNC:28517]	2	39664982	39717963	1
ENSG00000173208	-2.1086	0.231872	0.631445	-11.3824	1.62e-10	9.94e-10	14.2351	225	ABCD2	ATP binding cassette subfamily D member 2 [Source:HGNC Symbol;Acc:HGNC:66]	12	39550033	39619751	-1
ENSG00000280870	-2.10855	0.23188	1.76221	-13.3194	8.46e-12	6.93e-11	17.0844	101928469	MIR325HG	MIR325 host gene [Source:HGNC Symbol;Acc:HGNC:50346]	X	76657798	77014532	-1
ENSG00000123572	-2.10756	0.23204	1.31615	-11.4694	1.41e-10	8.75e-10	14.2935	203447	NRK	Nik related kinase [Source:HGNC Symbol;Acc:HGNC:25391]	X	105822543	105958610	1
ENSG00000155090	-2.10648	0.232213	3.73544	-26.4533	8.92e-18	3.59e-16	30.8269	7071	KLF10	Kruppel like factor 10 [Source:HGNC Symbol;Acc:HGNC:11810]	8	102648779	102655902	-1
ENSG00000151364	-2.10511	0.232434	-0.512602	-9.94248	1.86e-09	9.21e-09	11.8742	65987	KCTD14	potassium channel tetramerization domain containing 14 [Source:HGNC Symbol;Acc:HGNC:23295]	11	78015715	78046191	-1
ENSG00000143603	-2.10483	0.232479	-0.0413285	-9.483	4.27e-09	1.97e-08	11.0132	3782	KCNN3	potassium calcium-activated channel subfamily N member 3 [Source:HGNC Symbol;Acc:HGNC:6292]	1	154697455	154870280	-1
ENSG00000146221	-2.0999	0.233275	-0.433535	-9.81513	2.34e-09	1.13e-08	11.6445	202500	TCTE1	t-complex-associated-testis-expressed 1 [Source:HGNC Symbol;Acc:HGNC:11693]	6	44278743	44297688	-1
ENSG00000111981	-2.09939	0.233357	0.703471	-12.7082	2.07e-11	1.55e-10	16.2959	80329	ULBP1	UL16 binding protein 1 [Source:HGNC Symbol;Acc:HGNC:14893]	6	149964007	149973710	1
ENSG00000176641	-2.09751	0.233661	3.779	-20.9665	1.06e-15	2.28e-14	25.9409	220441	RNF152	ring finger protein 152 [Source:HGNC Symbol;Acc:HGNC:26811]	18	61808063	61894247	-1
ENSG00000133943	-2.09722	0.233708	3.14098	-19.8379	3.25e-15	6.03e-14	24.895	80017	C14orf159	chromosome 14 open reading frame 159 [Source:HGNC Symbol;Acc:HGNC:20498]	14	91060333	91225632	1
ENSG00000165655	-2.08979	0.234914	3.38581	-20.0449	2.63e-15	5.01e-14	25.0715	84858	ZNF503	zinc finger protein 503 [Source:HGNC Symbol;Acc:HGNC:23589]	10	75397830	75401906	-1
ENSG00000251322	-2.08644	0.235461	2.77186	-17.7821	2.94e-14	4.3e-13	22.7026	85358	SHANK3	SH3 and multiple ankyrin repeat domains 3 [Source:HGNC Symbol;Acc:HGNC:14294]	22	50674415	50733298	1
ENSG00000242779	-2.08642	0.235465	3.73059	-24.8071	3.36e-17	1.15e-15	29.4751	79986	ZNF702P	zinc finger protein 702, pseudogene [Source:HGNC Symbol;Acc:HGNC:25775]	19	52968251	53037898	-1
ENSG00000168772	-2.08589	0.23555	2.79816	-17.4112	4.48e-14	6.28e-13	22.2683	80319	CXXC4	CXXC finger protein 4 [Source:HGNC Symbol;Acc:HGNC:24593]	4	104468312	104494901	-1
ENSG00000266916	-2.08493	0.235707	0.51819	-10.3247	9.52e-10	4.99e-09	12.4627		ZNF793-AS1	ZNF793 antisense RNA 1 (head to head) [Source:HGNC Symbol;Acc:HGNC:51303]	19	37497159	37507046	-1
ENSG00000184702	-2.08345	0.235949	1.53606	-12.5908	2.46e-11	1.82e-10	16.0292	5413	2005-09-01	septin 5 [Source:HGNC Symbol;Acc:HGNC:9164]	22	19714464	19724772	1
ENSG00000131969	-2.08242	0.236118	2.63522	-18.5015	1.33e-14	2.11e-13	23.5312	145447	ABHD12B	abhydrolase domain containing 12B [Source:HGNC Symbol;Acc:HGNC:19837]	14	50872160	50904970	1
ENSG00000082512	-2.07792	0.236856	3.7586	-24.3923	4.76e-17	1.53e-15	29.1167	7188	TRAF5	TNF receptor associated factor 5 [Source:HGNC Symbol;Acc:HGNC:12035]	1	211326615	211374946	1
ENSG00000137267	-2.06679	0.23869	4.94616	-40.0442	1.55e-21	2.11e-19	39.5027	7280	TUBB2A	tubulin beta 2A class IIa [Source:HGNC Symbol;Acc:HGNC:12412]	6	3153669	3157526	-1
ENSG00000259498	-2.06547	0.238908	1.63821	-16.1199	2.07e-13	2.46e-12	20.8542		RP11-244F12.3		15	63046034	63049387	-1
ENSG00000105639	-2.06516	0.23896	0.0249335	-8.65519	2.03e-08	8.18e-08	9.43679	3718	JAK3	Janus kinase 3 [Source:HGNC Symbol;Acc:HGNC:6193]	19	17824780	17848071	-1
ENSG00000155816	-2.06497	0.238991	0.763891	-9.96127	1.8e-09	8.95e-09	11.7862	56776	FMN2	formin 2 [Source:HGNC Symbol;Acc:HGNC:14074]	1	240014348	240475189	1
ENSG00000121753	-2.06249	0.239403	1.81054	-15.4078	5.03e-13	5.46e-12	19.9405	576	ADGRB2	adhesion G protein-coupled receptor B2 [Source:HGNC Symbol;Acc:HGNC:944]	1	31727117	31764893	-1
ENSG00000143333	-2.06195	0.239492	2.00557	-10.4781	7.3e-10	3.91e-09	12.4853	6004	RGS16	regulator of G-protein signaling 16 [Source:HGNC Symbol;Acc:HGNC:9997]	1	182598623	182604408	-1
ENSG00000165272	-2.06153	0.239562	0.390473	-9.1806	7.48e-09	3.28e-08	10.3984	360	AQP3	aquaporin 3 (Gill blood group) [Source:HGNC Symbol;Acc:HGNC:636]	9	33441154	33447611	-1
ENSG00000180818	-2.05473	0.240694	4.35977	-29.0048	1.32e-18	6.79e-17	32.6967	3226	HOXC10	homeobox C10 [Source:HGNC Symbol;Acc:HGNC:5122]	12	53985065	53990279	1
ENSG00000233871	-2.05018	0.241453	-0.484049	-7.70554	1.36e-07	4.7e-07	7.59059		DLG5-AS1	DLG5 antisense RNA 1 [Source:HGNC Symbol;Acc:HGNC:45109]	10	77927372	77929824	1
ENSG00000143507	-2.04719	0.241955	-0.212637	-9.97376	1.76e-09	8.76e-09	11.9118	11221	DUSP10	dual specificity phosphatase 10 [Source:HGNC Symbol;Acc:HGNC:3065]	1	221701424	221742176	-1
ENSG00000077782	-2.04361	0.242556	6.4024	-53.2563	3.79e-24	1.24e-21	45.5132	2260	FGFR1	fibroblast growth factor receptor 1 [Source:HGNC Symbol;Acc:HGNC:3688]	8	38411138	38468834	-1
ENSG00000270722	-2.0383	0.24345	0.276836	-9.45105	4.53e-09	2.08e-08	10.9175		U1	U1 spliceosomal RNA [Source:RFAM;Acc:RF00003]	1	145465617	145465780	-1
ENSG00000253837	-2.03569	0.243892	2.71483	-18.2171	1.81e-14	2.81e-13	23.2015	100507156	RP11-177H13.2		8	23336171	23366125	1
ENSG00000100151	-2.03561	0.243905	2.00373	-17.6514	3.41e-14	4.92e-13	22.6421	9463	PICK1	protein interacting with PRKCA 1 [Source:HGNC Symbol;Acc:HGNC:9394]	22	38056311	38075701	1
ENSG00000078725	-2.03456	0.244082	0.325832	-11.9825	6.24e-11	4.23e-10	15.212	1620	BRINP1	BMP/retinoic acid inducible neural specific 1 [Source:HGNC Symbol;Acc:HGNC:2687]	9	119153458	119369467	-1
ENSG00000259409	-2.03411	0.244159	0.323645	-7.57845	1.77e-07	6e-07	7.20974		RP11-521C20.3		15	40088832	40089386	1
ENSG00000175229	-2.03292	0.244361	0.77619	-9.8442	2.22e-09	1.08e-08	11.5709	89792	GAL3ST3	galactose-3-O-sulfotransferase 3 [Source:HGNC Symbol;Acc:HGNC:24144]	11	66041952	66049180	-1
ENSG00000272573	-2.03237	0.244452	3.42405	-14.9748	8.8e-13	9e-12	19.0857	389125	MUSTN1	musculoskeletal, embryonic nuclear protein 1 [Source:HGNC Symbol;Acc:HGNC:22144]	3	52833114	52835219	-1
ENSG00000180155	-2.03021	0.244819	1.32602	-13.2867	8.87e-12	7.23e-11	17.0902	66004	LYNX1	Ly6/neurotoxin 1 [Source:HGNC Symbol;Acc:HGNC:29604]	8	142764334	142778224	-1
ENSG00000107984	-2.02768	0.245249	1.55802	-12.7226	2.02e-11	1.53e-10	16.2236	22943	DKK1	dickkopf WNT signaling pathway inhibitor 1 [Source:HGNC Symbol;Acc:HGNC:2891]	10	52314296	52318042	1
ENSG00000159784	-2.02722	0.245327	2.82893	-19.5568	4.34e-15	7.82e-14	24.6415	9715	FAM131B	family with sequence similarity 131 member B [Source:HGNC Symbol;Acc:HGNC:22202]	7	143353400	143362770	-1
ENSG00000164403	-2.02643	0.245462	0.656893	-10.8898	3.64e-10	2.07e-09	13.4145	134549	SHROOM1	shroom family member 1 [Source:HGNC Symbol;Acc:HGNC:24084]	5	132822141	132830898	-1
ENSG00000149798	-2.02486	0.245729	2.28431	-16.6014	1.16e-13	1.48e-12	21.3743	10435	CDC42EP2	CDC42 effector protein 2 [Source:HGNC Symbol;Acc:HGNC:16263]	11	65314818	65322429	1
ENSG00000204624	-2.02242	0.246145	-0.374905	-9.36874	5.27e-09	2.39e-08	10.8298	57540	DISP3	dispatched RND transporter family member 3 [Source:HGNC Symbol;Acc:HGNC:29251]	1	11479166	11537584	1
ENSG00000142765	-2.0187	0.246781	0.496728	-9.92256	1.93e-09	9.51e-09	11.7496	84958	SYTL1	synaptotagmin like 1 [Source:HGNC Symbol;Acc:HGNC:15584]	1	27342020	27353937	1
ENSG00000272168	-2.01736	0.24701	1.28341	-10.0373	1.57e-09	7.93e-09	11.8374	401237	CASC15	cancer susceptibility candidate 15 (non-protein coding) [Source:HGNC Symbol;Acc:HGNC:28245]	6	21664772	22368328	1
ENSG00000239467	-2.0164	0.247174	0.408302	-10.2386	1.11e-09	5.72e-09	12.3222		AC007405.6		2	170771113	170778148	1
ENSG00000168913	-2.01602	0.24724	0.514596	-12.1998	4.46e-11	3.12e-10	15.5366	375704	ENHO	energy homeostasis associated [Source:HGNC Symbol;Acc:HGNC:24838]	9	34521040	34523041	-1
ENSG00000138080	-2.0155	0.247328	5.63907	-23.7153	8.5e-17	2.48e-15	28.2103	11117	EMILIN1	elastin microfibril interfacer 1 [Source:HGNC Symbol;Acc:HGNC:19880]	2	27078567	27086408	1
ENSG00000165617	-2.00683	0.248819	5.36456	-23.2133	1.32e-16	3.7e-15	27.7987	51339	DACT1	dishevelled binding antagonist of beta catenin 1 [Source:HGNC Symbol;Acc:HGNC:17748]	14	58633967	58648321	1
ENSG00000231160	-2.00537	0.249071	1.15003	-11.4982	1.34e-10	8.39e-10	14.3595	79667	KLF3-AS1	KLF3 antisense RNA 1 [Source:HGNC Symbol;Acc:HGNC:25796]	4	38612701	38664883	-1
ENSG00000160097	-2.00178	0.249692	0.39144	-10.981	3.12e-10	1.8e-09	13.5934	252995	FNDC5	fibronectin type III domain containing 5 [Source:HGNC Symbol;Acc:HGNC:20240]	1	32862268	32872482	-1
ENSG00000250133	-1.99941	0.250102	2.33297	-13.1659	1.06e-11	8.46e-11	16.7561	100874364	HOXC-AS2	HOXC cluster antisense RNA 2 [Source:HGNC Symbol;Acc:HGNC:43750]	12	53993810	53996785	-1
ENSG00000158555	-1.99889	0.250193	1.94152	-14.8784	9.98e-13	1.01e-11	19.2275	81544	GDPD5	glycerophosphodiester phosphodiesterase domain containing 5 [Source:HGNC Symbol;Acc:HGNC:28804]	11	75434640	75525903	-1
ENSG00000126709	-1.99793	0.250359	3.13043	-19.3405	5.43e-15	9.59e-14	24.3664	2537	IFI6	interferon alpha inducible protein 6 [Source:HGNC Symbol;Acc:HGNC:4054]	1	27666061	27672218	-1
ENSG00000155760	-1.99749	0.250435	5.12109	-37.0302	8.02e-21	8.5e-19	37.8171	8324	FZD7	frizzled class receptor 7 [Source:HGNC Symbol;Acc:HGNC:4045]	2	202034587	202038445	1
ENSG00000161642	-1.99709	0.250504	1.05668	-11.6602	1.04e-10	6.63e-10	14.6334	25946	ZNF385A	zinc finger protein 385A [Source:HGNC Symbol;Acc:HGNC:17521]	12	54369133	54391298	-1
ENSG00000107821	-1.99666	0.25058	0.964808	-10.9415	3.34e-10	1.91e-09	13.4621	81621	KAZALD1	Kazal type serine peptidase inhibitor domain 1 [Source:HGNC Symbol;Acc:HGNC:25460]	10	101061841	101068131	1
ENSG00000172296	-1.99593	0.250706	0.573035	-9.54644	3.8e-09	1.77e-08	11.054	55304	SPTLC3	serine palmitoyltransferase long chain base subunit 3 [Source:HGNC Symbol;Acc:HGNC:16253]	20	13008979	13169103	1
ENSG00000144868	-1.99233	0.251333	1.3654	-12.6484	2.26e-11	1.68e-10	16.136	66000	TMEM108	transmembrane protein 108 [Source:HGNC Symbol;Acc:HGNC:28451]	3	133038391	133397792	1
ENSG00000248905	-1.98956	0.251816	1.83591	-13.9825	3.33e-12	2.99e-11	18.0166	342184	FMN1	formin 1 [Source:HGNC Symbol;Acc:HGNC:3768]	15	32765545	33194733	-1
ENSG00000185274	-1.98933	0.251856	2.06829	-13.3556	8.04e-12	6.62e-11	17.082	64409	WBSCR17	Williams-Beuren syndrome chromosome region 17 [Source:HGNC Symbol;Acc:HGNC:16347]	7	71132169	71713600	1
ENSG00000179314	-1.98621	0.252401	4.79792	-21.2485	8.05e-16	1.8e-14	26.0268	23302 339166	WSCD1	WSC domain containing 1 [Source:HGNC Symbol;Acc:HGNC:29060]	17	5772234	6124427	1
ENSG00000140450	-1.98462	0.25268	3.08432	-12.5442	2.64e-11	1.94e-10	15.6511	91947	ARRDC4	arrestin domain containing 4 [Source:HGNC Symbol;Acc:HGNC:28087]	15	97960698	97973838	1
ENSG00000130540	-1.98446	0.252708	0.168317	-10.1203	1.36e-09	6.92e-09	12.1373	25830	SULT4A1	sulfotransferase family 4A member 1 [Source:HGNC Symbol;Acc:HGNC:14903]	22	43824509	43862503	-1
ENSG00000111879	-1.98424	0.252746	2.26951	-12.7834	1.85e-11	1.4e-10	16.1935	79632	FAM184A	family with sequence similarity 184 member A [Source:HGNC Symbol;Acc:HGNC:20991]	6	118959763	119149387	-1
ENSG00000173918	-1.98218	0.253107	-0.427701	-9.04662	9.62e-09	4.12e-08	10.2325	114897	C1QTNF1	C1q and tumor necrosis factor related protein 1 [Source:HGNC Symbol;Acc:HGNC:14324]	17	79022814	79049788	1
ENSG00000228203	-1.9805	0.253401	1.41023	-12.0201	5.89e-11	4.02e-10	15.1586	386597	RNF144A-AS1	RNF144A antisense RNA 1 [Source:HGNC Symbol;Acc:HGNC:30963]	2	6912277	6918709	-1
ENSG00000147119	-1.97999	0.253491	0.78824	-11.4566	1.44e-10	8.91e-10	14.336	56548	CHST7	carbohydrate sulfotransferase 7 [Source:HGNC Symbol;Acc:HGNC:13817]	X	46573784	46598408	1
ENSG00000134013	-1.97873	0.253713	5.80378	-24.4084	4.7e-17	1.52e-15	28.7971	4017	LOXL2	lysyl oxidase like 2 [Source:HGNC Symbol;Acc:HGNC:6666]	8	23297189	23425328	-1
ENSG00000118997	-1.97742	0.253944	0.384725	-8.86688	1.35e-08	5.62e-08	9.79628	56171	DNAH7	dynein axonemal heavy chain 7 [Source:HGNC Symbol;Acc:HGNC:18661]	2	195737703	196068812	-1
ENSG00000110723	-1.97467	0.254429	-0.0215339	-10.6829	5.15e-10	2.84e-09	13.1243	23086	EXPH5	exophilin 5 [Source:HGNC Symbol;Acc:HGNC:30578]	11	108505431	108593738	-1
ENSG00000059377	-1.97459	0.254442	-0.0797994	-9.84124	2.23e-09	1.08e-08	11.6636	6916	TBXAS1	thromboxane A synthase 1 [Source:HGNC Symbol;Acc:HGNC:11609]	7	139777051	140020325	1
ENSG00000277968	-1.97375	0.25459	0.749283	-8.11	5.97e-08	2.2e-07	8.23262		SPRY4-IT1_1	SPRY4-IT1 conserved region 1 [Source:RFAM;Acc:RF02038]	5	142317830	142317920	1
ENSG00000157214	-1.97374	0.254593	0.887204	-11.8706	7.44e-11	4.94e-10	14.9886	261729	STEAP2	STEAP2 metalloreductase [Source:HGNC Symbol;Acc:HGNC:17885]	7	90167590	90238137	1
ENSG00000143473	-1.96741	0.255711	1.05605	-8.43436	3.13e-08	1.21e-07	8.831	3756	KCNH1	potassium voltage-gated channel subfamily H member 1 [Source:HGNC Symbol;Acc:HGNC:6250]	1	210678315	211134115	-1
ENSG00000173825	-1.9669	0.255801	-0.121124	-8.93113	1.2e-08	5.01e-08	9.98376	220359	TIGD3	tigger transposable element derived 3 [Source:HGNC Symbol;Acc:HGNC:18334]	11	65354767	65357613	1
ENSG00000202515	-1.96619	0.255928	1.9793	-16.4239	1.43e-13	1.79e-12	21.1928	56662	VTRNA1-3	vault RNA 1-3 [Source:HGNC Symbol;Acc:HGNC:12656]	5	140726158	140726246	1
ENSG00000165644	-1.96358	0.256392	-0.135378	-10.1671	1.25e-09	6.42e-09	12.2447	118881	COMTD1	catechol-O-methyltransferase domain containing 1 [Source:HGNC Symbol;Acc:HGNC:26309]	10	75233969	75236030	-1
ENSG00000279713	-1.9619	0.25669	1.64028	-14.2303	2.37e-12	2.21e-11	18.3859		CTD-3035K23.3		17	62679403	62681354	-1
ENSG00000111962	-1.96121	0.256814	5.27437	-27.3154	4.59e-18	1.97e-16	31.2798	10090	UST	uronyl 2-sulfotransferase [Source:HGNC Symbol;Acc:HGNC:17223]	6	148747328	149076990	1
ENSG00000162458	-1.9606	0.256922	4.06298	-26.2752	1.03e-17	4.02e-16	30.6365	54751	FBLIM1	filamin binding LIM protein 1 [Source:HGNC Symbol;Acc:HGNC:24686]	1	15756607	15786594	1
ENSG00000101850	-1.95949	0.257119	-0.327072	-8.14075	5.61e-08	2.08e-07	8.4573	4935	GPR143	G protein-coupled receptor 143 [Source:HGNC Symbol;Acc:HGNC:20145]	X	9725346	9786297	-1
ENSG00000092421	-1.95542	0.257846	3.1259	-23.8604	7.49e-17	2.24e-15	28.7248	57556	SEMA6A	semaphorin 6A [Source:HGNC Symbol;Acc:HGNC:10738]	5	116443616	116574934	-1
ENSG00000151067	-1.95163	0.258524	0.770663	-9.80449	2.38e-09	1.15e-08	11.4957	775	CACNA1C	calcium voltage-gated channel subunit alpha1 C [Source:HGNC Symbol;Acc:HGNC:1390]	12	1970786	2697950	1
ENSG00000129951	-1.95065	0.258699	-0.0261666	-9.9608	1.8e-09	8.95e-09	11.872	79948	PLPPR3	phospholipid phosphatase related 3 [Source:HGNC Symbol;Acc:HGNC:23497]	19	812488	821977	-1
ENSG00000120318	-1.94803	0.259171	2.80006	-20.407	1.83e-15	3.69e-14	25.5184	64411	ARAP3	ArfGAP with RhoGAP domain, ankyrin repeat and PH domain 3 [Source:HGNC Symbol;Acc:HGNC:24097]	5	141653401	141682221	-1
ENSG00000158186	-1.94742	0.259279	3.44421	-27.2243	4.92e-18	2.08e-16	31.4522	22808	MRAS	muscle RAS oncogene homolog [Source:HGNC Symbol;Acc:HGNC:7227]	3	138347648	138405534	1
ENSG00000079337	-1.94714	0.259331	0.543167	-9.53612	3.87e-09	1.8e-08	11.0365	10411	RAPGEF3	Rap guanine nucleotide exchange factor 3 [Source:HGNC Symbol;Acc:HGNC:16629]	12	47734367	47771040	-1
ENSG00000073464	-1.94682	0.259388	2.98531	-21.0447	9.79e-16	2.14e-14	26.1311	1183	CLCN4	chloride voltage-gated channel 4 [Source:HGNC Symbol;Acc:HGNC:2022]	X	10156945	10237660	1
ENSG00000197837	-1.94677	0.259396	5.73584	-37.8069	5.19e-21	5.82e-19	38.1992	121504	HIST4H4	histone cluster 4, H4 [Source:HGNC Symbol;Acc:HGNC:20510]	12	14767999	14771131	-1
ENSG00000099860	-1.94558	0.25961	1.36974	-9.25176	6.55e-09	2.9e-08	10.3639	4616	GADD45B	growth arrest and DNA damage inducible beta [Source:HGNC Symbol;Acc:HGNC:4096]	19	2476122	2478259	1
ENSG00000173175	-1.94534	0.259654	1.21367	-12.0052	6.03e-11	4.1e-10	15.161	111	ADCY5	adenylate cyclase 5 [Source:HGNC Symbol;Acc:HGNC:236]	3	123282296	123449758	-1
ENSG00000114853	-1.94475	0.259759	2.86162	-18.5219	1.3e-14	2.08e-13	23.5154	92999	ZBTB47	zinc finger and BTB domain containing 47 [Source:HGNC Symbol;Acc:HGNC:26955]	3	42653684	42665854	1
ENSG00000198088	-1.93819	0.260943	0.259495	-8.8376	1.43e-08	5.91e-08	9.7555	54830	NUP62CL	nucleoporin 62 C-terminal like [Source:HGNC Symbol;Acc:HGNC:25960]	X	107123427	107206433	-1
ENSG00000183807	-1.93739	0.261088	0.6301	-10.0393	1.57e-09	7.91e-09	11.9389	221303	FAM162B	family with sequence similarity 162 member B [Source:HGNC Symbol;Acc:HGNC:21549]	6	116752197	116765723	-1
ENSG00000075461	-1.93684	0.261188	2.00565	-9.82413	2.3e-09	1.11e-08	11.3008	27092	CACNG4	calcium voltage-gated channel auxiliary subunit gamma 4 [Source:HGNC Symbol;Acc:HGNC:1408]	17	66964910	67033398	1
ENSG00000091879	-1.93485	0.261548	2.78198	-17.7575	3.02e-14	4.41e-13	22.6638	285	ANGPT2	angiopoietin 2 [Source:HGNC Symbol;Acc:HGNC:485]	8	6499651	6563409	-1
ENSG00000145990	-1.93374	0.26175	2.991	-14.2711	2.24e-12	2.1e-11	18.2073	54438	GFOD1	glucose-fructose oxidoreductase domain containing 1 [Source:HGNC Symbol;Acc:HGNC:21096]	6	13357830	13487662	-1
ENSG00000136840	-1.93355	0.261784	2.222	-16.2429	1.78e-13	2.14e-12	20.9392	27090	ST6GALNAC4	ST6 N-acetylgalactosaminide alpha-2,6-sialyltransferase 4 [Source:HGNC Symbol;Acc:HGNC:17846]	9	127907886	127917038	-1
ENSG00000162783	-1.93308	0.261869	4.25652	-28.7704	1.56e-18	7.89e-17	32.5313	51278	IER5	immediate early response 5 [Source:HGNC Symbol;Acc:HGNC:5393]	1	181088712	181092899	1
ENSG00000155966	-1.93303	0.261878	4.14696	-25.0282	2.8e-17	9.86e-16	29.5947	2334	AFF2	AF4/FMR2 family member 2 [Source:HGNC Symbol;Acc:HGNC:3776]	X	148500619	149000663	1
ENSG00000183048	-1.93228	0.262016	3.81599	-23.3412	1.18e-16	3.35e-15	28.1742	1468	SLC25A10	solute carrier family 25 member 10 [Source:HGNC Symbol;Acc:HGNC:10980]	17	81712236	81721016	1
ENSG00000176720	-1.93098	0.262252	3.76261	-18.3335	1.59e-14	2.49e-13	23.1415	666	BOK	BOK, BCL2 family apoptosis regulator [Source:HGNC Symbol;Acc:HGNC:1087]	2	241558721	241574138	1
ENSG00000130208	-1.93065	0.262312	0.981594	-10.61	5.83e-10	3.19e-09	12.8912	341	APOC1	apolipoprotein C1 [Source:HGNC Symbol;Acc:HGNC:607]	19	44914247	44919349	1
ENSG00000175899	-1.9292	0.262574	4.26868	-12.454	3.03e-11	2.19e-10	15.2245	2	A2M	alpha-2-macroglobulin [Source:HGNC Symbol;Acc:HGNC:7]	12	9067664	9116229	-1
ENSG00000137825	-1.92481	0.263376	-0.317563	-8.12332	5.81e-08	2.14e-07	8.41967	3706	ITPKA	inositol-trisphosphate 3-kinase A [Source:HGNC Symbol;Acc:HGNC:6178]	15	41493393	41503551	1
ENSG00000133169	-1.9196	0.264328	3.65494	-24.5949	4.02e-17	1.33e-15	29.2963	55859	BEX1	brain expressed X-linked 1 [Source:HGNC Symbol;Acc:HGNC:1036]	X	103062651	103064240	-1
ENSG00000138400	-1.9165	0.264896	0.835084	-11.4634	1.42e-10	8.82e-10	14.3395	130752	MDH1B	malate dehydrogenase 1B [Source:HGNC Symbol;Acc:HGNC:17836]	2	206737763	206765547	-1
ENSG00000269899	-1.91646	0.264903	1.6521	-12.0768	5.39e-11	3.71e-10	15.2054		RP11-589N15.2		8	11846154	11846391	-1
ENSG00000128591	-1.91602	0.264985	2.92702	-14.1855	2.52e-12	2.33e-11	18.0997	2318	FLNC	filamin C [Source:HGNC Symbol;Acc:HGNC:3756]	7	128830377	128859274	1
ENSG00000229637	-1.91202	0.26572	1.01382	-8.85663	1.38e-08	5.72e-08	9.66996	360205	PRAC2	prostate cancer susceptibility candidate 2 [Source:HGNC Symbol;Acc:HGNC:30143]	17	48723168	48724758	1
ENSG00000175832	-1.90817	0.26643	5.62707	-16.8974	8.13e-14	1.07e-12	21.0821	2118	ETV4	ETS variant 4 [Source:HGNC Symbol;Acc:HGNC:3493]	17	43527844	43579620	-1
ENSG00000134755	-1.90449	0.26711	4.42146	-20.9444	1.08e-15	2.32e-14	25.7883	1824	DSC2	desmocollin 2 [Source:HGNC Symbol;Acc:HGNC:3036]	18	31058840	31102415	-1
ENSG00000099204	-1.90348	0.267298	5.93008	-33.366	7.11e-20	5.29e-18	35.4862	3983	ABLIM1	actin binding LIM protein 1 [Source:HGNC Symbol;Acc:HGNC:78]	10	114431113	114685003	-1
ENSG00000179930	-1.9029	0.267405	-0.209429	-7.19983	3.93e-07	1.26e-06	6.48404	127665	ZNF648	zinc finger protein 648 [Source:HGNC Symbol;Acc:HGNC:18190]	1	182054570	182061712	-1
ENSG00000152932	-1.90263	0.267456	1.70557	-14.2915	2.18e-12	2.05e-11	18.46	115827	RAB3C	RAB3C, member RAS oncogene family [Source:HGNC Symbol;Acc:HGNC:30269]	5	58582221	58859394	1
ENSG00000121316	-1.90232	0.267512	1.24515	-10.9011	3.57e-10	2.03e-09	13.3469	79887	PLBD1	phospholipase B domain containing 1 [Source:HGNC Symbol;Acc:HGNC:26215]	12	14503661	14568349	-1
ENSG00000224945	-1.9006	0.267832	0.367252	-10.0242	1.61e-09	8.1e-09	11.9434		RP11-82L18.2		9	89088604	89109934	-1
ENSG00000013583	-1.89926	0.268081	1.3041	-10.7366	4.7e-10	2.62e-09	13.0566	50865	HEBP1	heme binding protein 1 [Source:HGNC Symbol;Acc:HGNC:17176]	12	12974864	13000273	-1
ENSG00000102760	-1.89679	0.26854	0.913306	-8.76875	1.63e-08	6.69e-08	9.51637	28984	RGCC	regulator of cell cycle [Source:HGNC Symbol;Acc:HGNC:20369]	13	41457559	41470882	1
ENSG00000242732	-1.89124	0.269576	1.60015	-11.0754	2.67e-10	1.57e-09	13.5811	340526	RGAG4	retrotransposon gag domain containing 4 [Source:HGNC Symbol;Acc:HGNC:29430]	X	72127110	72131901	-1
ENSG00000154760	-1.8887	0.27005	2.38238	-17.0044	7.17e-14	9.53e-13	21.8394	146857	SLFN13	schlafen family member 13 [Source:HGNC Symbol;Acc:HGNC:26481]	17	35435096	35448837	-1
ENSG00000188227	-1.88793	0.270195	3.48161	-22.3593	2.84e-16	7.27e-15	27.3209	390927	ZNF793	zinc finger protein 793 [Source:HGNC Symbol;Acc:HGNC:33115]	19	37506939	37548762	1
ENSG00000157557	-1.88624	0.270511	5.17044	-26.2148	1.08e-17	4.18e-16	30.4124	2114	ETS2	ETS proto-oncogene 2, transcription factor [Source:HGNC Symbol;Acc:HGNC:3489]	21	38805307	38824955	1
ENSG00000185920	-1.88522	0.270702	4.73821	-22.2916	3.02e-16	7.67e-15	27.042	5727	PTCH1	patched 1 [Source:HGNC Symbol;Acc:HGNC:9585]	9	95442980	95517057	-1
ENSG00000239552	-1.88481	0.27078	0.0427016	-8.32312	3.9e-08	1.49e-07	8.77284		HOXB-AS2	HOXB cluster antisense RNA 2 [Source:HGNC Symbol;Acc:HGNC:40284]	17	48557262	48560333	1
ENSG00000125089	-1.88233	0.271245	1.20128	-12.2722	3.99e-11	2.81e-10	15.577	54436	SH3TC1	SH3 domain and tetratricopeptide repeats 1 [Source:HGNC Symbol;Acc:HGNC:26009]	4	8182072	8241803	1
ENSG00000071205	-1.8737	0.272872	3.55976	-20.947	1.08e-15	2.32e-14	25.9448	79658	ARHGAP10	Rho GTPase activating protein 10 [Source:HGNC Symbol;Acc:HGNC:26099]	4	147732063	148072780	1
ENSG00000104081	-1.87292	0.273021	3.43557	-9.29108	6.08e-09	2.72e-08	9.9439	90427	BMF	Bcl2 modifying factor [Source:HGNC Symbol;Acc:HGNC:24132]	15	40087890	40108892	-1
ENSG00000137628	-1.87204	0.273187	2.4665	-15.6066	3.91e-13	4.33e-12	20.0947	55601	DDX60	DEXD/H-box helicase 60 [Source:HGNC Symbol;Acc:HGNC:25942]	4	168216293	168318807	-1
ENSG00000162618	-1.86705	0.274132	0.797795	-7.08752	5e-07	1.57e-06	6.05952	64123	ADGRL4	adhesion G protein-coupled receptor L4 [Source:HGNC Symbol;Acc:HGNC:20822]	1	78889764	79006718	-1
ENSG00000126500	-1.86545	0.274437	1.14885	-11.3077	1.83e-10	1.11e-09	14.0408	23769	FLRT1	fibronectin leucine rich transmembrane protein 1 [Source:HGNC Symbol;Acc:HGNC:3760]	11	64103188	64119173	1
ENSG00000184867	-1.86201	0.275093	5.48782	-38.5006	3.54e-21	4.23e-19	38.6106	9823	ARMCX2	armadillo repeat containing, X-linked 2 [Source:HGNC Symbol;Acc:HGNC:16869]	X	101655281	101659891	-1
ENSG00000179403	-1.86044	0.275392	2.62668	-15.0925	7.55e-13	7.81e-12	19.3942	64856	VWA1	von Willebrand factor A domain containing 1 [Source:HGNC Symbol;Acc:HGNC:30910]	1	1434861	1442882	1
ENSG00000255410	-1.86005	0.275467	0.239549	-10.4173	8.11e-10	4.3e-09	12.6461		RP11-732A19.6		11	6630603	6635208	1
ENSG00000269082	-1.85915	0.275638	1.57532	-12.4568	3.01e-11	2.18e-10	15.8073		CTD-2620I22.1		19	52956041	52981654	-1
ENSG00000152583	-1.85846	0.27577	1.2738	-10.3704	8.79e-10	4.63e-09	12.4234	8404	SPARCL1	SPARC like 1 [Source:HGNC Symbol;Acc:HGNC:11220]	4	87473335	87531061	-1
ENSG00000270087	-1.85679	0.27609	0.402639	-8.82957	1.45e-08	6e-08	9.71674		RP11-399K21.11		10	75279726	75401246	-1
ENSG00000173193	-1.85548	0.276341	3.87753	-23.7513	8.24e-17	2.41e-15	28.5268	54625	PARP14	poly(ADP-ribose) polymerase family member 14 [Source:HGNC Symbol;Acc:HGNC:29232]	3	122680618	122730840	1
ENSG00000171310	-1.84467	0.27842	3.96583	-27.9065	2.95e-18	1.34e-16	31.9174	50515	CHST11	carbohydrate sulfotransferase 11 [Source:HGNC Symbol;Acc:HGNC:17422]	12	104455295	104762014	1
ENSG00000150054	-1.84445	0.278462	1.3965	-12.3977	3.3e-11	2.37e-10	15.7423	143098	MPP7	membrane palmitoylated protein 7 [Source:HGNC Symbol;Acc:HGNC:26542]	10	28050993	28334486	-1
ENSG00000264272	-1.843	0.278741	0.126024	-8.73874	1.73e-08	7.05e-08	9.5785		CTD-2514K5.4		17	74256896	74262020	-1
ENSG00000152127	-1.83796	0.279717	5.19189	-35.6322	1.8e-20	1.61e-18	36.9793	4249	MGAT5	mannosyl (alpha-1,6-)-glycoprotein beta-1,6-N-acetyl-glucosaminyltransferase [Source:HGNC Symbol;Acc:HGNC:7049]	2	134119983	134454621	1
ENSG00000108947	-1.83478	0.280334	3.50182	-17.628	3.5e-14	5.03e-13	22.3773	1949	EFNB3	ephrin B3 [Source:HGNC Symbol;Acc:HGNC:3228]	17	7705202	7711378	1
ENSG00000129116	-1.83463	0.280363	4.68236	-29.4206	9.83e-19	5.31e-17	32.9461	23022	PALLD	palladin, cytoskeletal associated protein [Source:HGNC Symbol;Acc:HGNC:17068]	4	168497066	168928457	1
ENSG00000105717	-1.83143	0.280985	0.426828	-8.51269	2.68e-08	1.05e-07	9.09137	80714	PBX4	PBX homeobox 4 [Source:HGNC Symbol;Acc:HGNC:13403]	19	19561707	19618916	-1
ENSG00000196628	-1.83122	0.281027	6.20102	-49.2548	1.97e-23	5.06e-21	43.8452	6925	TCF4	transcription factor 4 [Source:HGNC Symbol;Acc:HGNC:11634]	18	55222198	55664787	-1
ENSG00000181031	-1.82974	0.281315	-0.544532	-8.62395	2.16e-08	8.66e-08	9.43086	9501	RPH3AL	rabphilin 3A-like (without C2 domains) [Source:HGNC Symbol;Acc:HGNC:10296]	17	212389	386254	-1
ENSG00000207442	-1.82593	0.282059	0.532138	-9.75905	2.59e-09	1.24e-08	11.4423	100033418	SNORD116-6	small nucleolar RNA, C/D box 116-6 [Source:HGNC Symbol;Acc:HGNC:33072]	15	25065026	25065121	1
ENSG00000146250	-1.82327	0.28258	0.953616	-10.6962	5.04e-10	2.79e-09	13.039	167681	PRSS35	protease, serine 35 [Source:HGNC Symbol;Acc:HGNC:21387]	6	83512538	83525704	1
ENSG00000227660	-1.82234	0.282762	-0.215922	-7.2307	3.68e-07	1.18e-06	6.54754		UST-AS1	UST antisense RNA 1 [Source:HGNC Symbol;Acc:HGNC:40802]	6	148955628	148964684	-1
ENSG00000004660	-1.82193	0.282842	0.110733	-8.93161	1.2e-08	5.01e-08	9.95239	84254	CAMKK1	calcium/calmodulin dependent protein kinase kinase 1 [Source:HGNC Symbol;Acc:HGNC:1469]	17	3860315	3894891	-1
ENSG00000141449	-1.82	0.283221	5.95656	-30.1953	5.72e-19	3.34e-17	33.3293	80000	GREB1L	growth regulation by estrogen in breast cancer 1 like [Source:HGNC Symbol;Acc:HGNC:31042]	18	21242242	21525417	1
ENSG00000220785	-1.81958	0.283304	2.64966	-16.042	2.28e-13	2.69e-12	20.6151		MTMR9LP	myotubularin related protein 9-like, pseudogene [Source:HGNC Symbol;Acc:HGNC:27920]	1	32231658	32241620	-1
ENSG00000188060	-1.81623	0.283962	-0.121404	-7.25378	3.51e-07	1.13e-06	6.582	115273	RAB42	RAB42, member RAS oncogene family [Source:HGNC Symbol;Acc:HGNC:28702]	1	28592200	28595443	1
ENSG00000239704	-1.81546	0.284113	3.14133	-21.2141	8.32e-16	1.85e-14	26.2709	284040	CDRT4	CMT1A duplicated region transcript 4 [Source:HGNC Symbol;Acc:HGNC:14383]	17	15436015	15503608	-1
ENSG00000099139	-1.81447	0.284309	2.77761	-19.0485	7.38e-15	1.26e-13	24.0967	5125	PCSK5	proprotein convertase subtilisin/kexin type 5 [Source:HGNC Symbol;Acc:HGNC:8747]	9	75890644	76362339	1
ENSG00000183111	-1.81327	0.284546	1.34066	-11.3107	1.82e-10	1.11e-09	14.0135	389337	ARHGEF37	Rho guanine nucleotide exchange factor 37 [Source:HGNC Symbol;Acc:HGNC:34430]	5	149551947	149634968	1
ENSG00000103710	-1.80792	0.285602	-0.0401101	-7.85791	9.95e-08	3.52e-07	7.83885	51285	RASL12	RAS like family 12 [Source:HGNC Symbol;Acc:HGNC:30289]	15	65053337	65076690	-1
ENSG00000116774	-1.80791	0.285603	3.31257	-18.5315	1.28e-14	2.06e-13	23.441	56944	OLFML3	olfactomedin like 3 [Source:HGNC Symbol;Acc:HGNC:24956]	1	113979391	114035572	1
ENSG00000227295	-1.80749	0.285688	0.838683	-10.8192	4.09e-10	2.31e-09	13.2638		ELL2P1	elongation factor for RNA polymerase II 2 pseudogene 1 [Source:HGNC Symbol;Acc:HGNC:39343]	1	158175850	158177755	-1
ENSG00000137834	-1.8045	0.28628	1.7829	-13.7913	4.34e-12	3.81e-11	17.7462	4091	SMAD6	SMAD family member 6 [Source:HGNC Symbol;Acc:HGNC:6772]	15	66702228	66782848	1
ENSG00000251246	-1.80338	0.286502	1.30451	-11.5788	1.18e-10	7.47e-10	14.4587		RP11-540D14.8		1	155063748	155086807	1
ENSG00000205885	-1.80061	0.287053	1.64573	-12.8375	1.71e-11	1.31e-10	16.373	283314	C1RL-AS1	C1RL antisense RNA 1 [Source:HGNC Symbol;Acc:HGNC:27461]	12	7108052	7122501	1
ENSG00000189337	-1.80058	0.28706	1.91369	-14.5089	1.63e-12	1.58e-11	18.7247	23254	KAZN	kazrin, periplakin interacting protein [Source:HGNC Symbol;Acc:HGNC:29173]	1	13892792	15118043	1
ENSG00000146700	-1.79759	0.287655	1.21818	-10.1614	1.27e-09	6.48e-09	12.0597	136853	SSC4D	scavenger receptor cysteine rich family member with 4 domains [Source:HGNC Symbol;Acc:HGNC:14461]	7	76389334	76409695	-1
ENSG00000177191	-1.79677	0.287818	-0.269009	-8.09915	6.1e-08	2.24e-07	8.36087	374907	B3GNT8	UDP-GlcNAc:betaGal beta-1,3-N-acetylglucosaminyltransferase 8 [Source:HGNC Symbol;Acc:HGNC:24139]	19	41425359	41428730	-1
ENSG00000281881	-1.79532	0.288107	2.23869	-9.91925	1.94e-09	9.56e-09	11.411	100642175	SPRY4-IT1	SPRY4 intronic transcript 1 [Source:HGNC Symbol;Acc:HGNC:42394]	5	142317620	142318322	-1
ENSG00000013563	-1.79321	0.28853	2.99786	-18.4506	1.4e-14	2.22e-13	23.406	1774	DNASE1L1	deoxyribonuclease 1 like 1 [Source:HGNC Symbol;Acc:HGNC:2957]	X	154401238	154412112	-1
ENSG00000156463	-1.79274	0.288623	0.127214	-6.85922	8.19e-07	2.48e-06	5.68384	153769	SH3RF2	SH3 domain containing ring finger 2 [Source:HGNC Symbol;Acc:HGNC:26299]	5	145936579	146081791	1
ENSG00000143387	-1.79174	0.288824	1.94708	-12.0501	5.62e-11	3.85e-10	15.1032	1513	CTSK	cathepsin K [Source:HGNC Symbol;Acc:HGNC:2536]	1	150796208	150808323	-1
ENSG00000207133	-1.78856	0.289461	0.441232	-8.48504	2.83e-08	1.11e-07	9.03195	100033419	SNORD116-7	small nucleolar RNA, C/D box 116-7 [Source:HGNC Symbol;Acc:HGNC:33073]	15	25067788	25067882	1
ENSG00000274565	-1.78751	0.289672	0.0129539	-7.82296	1.07e-07	3.76e-07	7.75723		CTD-3035K23.7		17	62626437	62627590	-1
ENSG00000122986	-1.78452	0.290272	1.12966	-10.7592	4.53e-10	2.53e-09	13.1178	84329	HVCN1	hydrogen voltage gated channel 1 [Source:HGNC Symbol;Acc:HGNC:28240]	12	110627841	110704950	-1
ENSG00000101000	-1.78352	0.290474	0.134792	-7.87463	9.61e-08	3.41e-07	7.84444	10544	PROCR	protein C receptor [Source:HGNC Symbol;Acc:HGNC:9452]	20	35172073	35216240	1
ENSG00000158792	-1.78314	0.290551	2.93393	-18.4937	1.34e-14	2.13e-13	23.464	124044	SPATA2L	spermatogenesis associated 2 like [Source:HGNC Symbol;Acc:HGNC:28393]	16	89696343	89701705	-1
ENSG00000189292	-1.78112	0.290958	1.51382	-9.75958	2.58e-09	1.24e-08	11.2745	285016	FAM150B	family with sequence similarity 150 member B [Source:HGNC Symbol;Acc:HGNC:27683]	2	279558	288851	-1
ENSG00000177614	-1.7791	0.291366	2.09335	-14.7117	1.24e-12	1.23e-11	18.9711	79605	PGBD5	piggyBac transposable element derived 5 [Source:HGNC Symbol;Acc:HGNC:19405]	1	230314482	230426371	-1
ENSG00000134215	-1.77903	0.29138	1.24613	-12.4489	3.05e-11	2.2e-10	15.8396	10451	VAV3	vav guanine nucleotide exchange factor 3 [Source:HGNC Symbol;Acc:HGNC:12659]	1	107571160	107965144	-1
ENSG00000164591	-1.77628	0.291935	1.62733	-12.7497	1.94e-11	1.47e-10	16.242	91977	MYOZ3	myozenin 3 [Source:HGNC Symbol;Acc:HGNC:18565]	5	150660874	150679365	1
ENSG00000158528	-1.77263	0.292674	4.40115	-24.9601	2.96e-17	1.03e-15	29.4875	55607	PPP1R9A	protein phosphatase 1 regulatory subunit 9A [Source:HGNC Symbol;Acc:HGNC:14946]	7	94907202	95296415	1
ENSG00000106366	-1.77164	0.292876	-0.0494791	-6.67202	1.23e-06	3.61e-06	5.29967	5054	SERPINE1	serpin family E member 1 [Source:HGNC Symbol;Acc:HGNC:8583]	7	101127089	101139266	1
ENSG00000196839	-1.77148	0.292907	2.64294	-14.9049	9.64e-13	9.77e-12	19.1348	100	ADA	adenosine deaminase [Source:HGNC Symbol;Acc:HGNC:186]	20	44619522	44652233	-1
ENSG00000031081	-1.77118	0.292969	4.56779	-24.2253	5.48e-17	1.73e-15	28.8258	57514	ARHGAP31	Rho GTPase activating protein 31 [Source:HGNC Symbol;Acc:HGNC:29216]	3	119294373	119420714	1
ENSG00000102383	-1.77075	0.293057	1.55932	-10.8372	3.97e-10	2.25e-09	13.1774	158866	ZDHHC15	zinc finger DHHC-type containing 15 [Source:HGNC Symbol;Acc:HGNC:20342]	X	75368427	75523502	-1
ENSG00000225376	-1.76957	0.293296	-0.0231094	-7.67189	1.46e-07	5.01e-07	7.44883	101928470	TMEM246-AS1	TMEM246 antisense RNA 1 [Source:HGNC Symbol;Acc:HGNC:51191]	9	101468439	101481502	1
ENSG00000214279	-1.7688	0.293453	-0.136781	-8.67734	1.95e-08	7.88e-08	9.49005	619207	SCART1	scavenger receptor protein family member [Source:EntrezGene;Acc:619207]	10	133453928	133523558	1
ENSG00000170959	-1.76684	0.293851	0.0424978	-8.6055	2.24e-08	8.95e-08	9.32668	341019 100506627	DCDC1	doublecortin domain containing 1 [Source:HGNC Symbol;Acc:HGNC:20625]	11	30830369	31369810	-1
ENSG00000215808	-1.76663	0.293894	2.85885	-19.8694	3.15e-15	5.86e-14	24.9522	339535	LINC01139	long intergenic non-protein coding RNA 1139 [Source:HGNC Symbol;Acc:HGNC:27924]	1	238480384	238486023	-1
ENSG00000175147	-1.76563	0.294098	0.374489	-6.51974	1.73e-06	4.92e-06	4.88248	200197	TMEM51-AS1	TMEM51 antisense RNA 1 [Source:HGNC Symbol;Acc:HGNC:26301]	1	15111815	15152464	-1
ENSG00000120913	-1.76552	0.29412	3.34074	-18.0512	2.18e-14	3.31e-13	22.8923	64236	PDLIM2	PDZ and LIM domain 2 [Source:HGNC Symbol;Acc:HGNC:13992]	8	22578279	22598025	1
ENSG00000139178	-1.76519	0.294187	3.47512	-20.4345	1.78e-15	3.6e-14	25.437	51279	C1RL	complement C1r subcomponent like [Source:HGNC Symbol;Acc:HGNC:21265]	12	7089587	7109273	-1
ENSG00000118298	-1.76336	0.294561	4.10197	-24.0049	6.62e-17	2.02e-15	28.71	23632	CA14	carbonic anhydrase 14 [Source:HGNC Symbol;Acc:HGNC:1372]	1	150257159	150265078	1
ENSG00000108375	-1.76254	0.29473	3.35487	-17.486	4.11e-14	5.81e-13	22.2344	54894	RNF43	ring finger protein 43 [Source:HGNC Symbol;Acc:HGNC:18505]	17	58352500	58417595	-1
ENSG00000187122	-1.76204	0.294831	0.737479	-7.31158	3.1e-07	1.01e-06	6.55254	6585	SLIT1	slit guidance ligand 1 [Source:HGNC Symbol;Acc:HGNC:11085]	10	96998038	97185920	-1
ENSG00000166342	-1.76082	0.29508	-0.0441927	-8.96948	1.11e-08	4.7e-08	10.0412	81832	NETO1	neuropilin and tolloid like 1 [Source:HGNC Symbol;Acc:HGNC:13823]	18	72742314	72868146	-1
ENSG00000100228	-1.75999	0.295249	2.36139	-16.1961	1.88e-13	2.25e-12	20.852	9609	RAB36	RAB36, member RAS oncogene family [Source:HGNC Symbol;Acc:HGNC:9775]	22	23145326	23164350	1
ENSG00000263602	-1.75618	0.296031	-0.0275279	-8.09665	6.13e-08	2.26e-07	8.32203	100422978	MIR3185	microRNA 3185 [Source:HGNC Symbol;Acc:HGNC:38391]	17	48724408	48724475	-1
ENSG00000135502	-1.75559	0.296152	2.26609	-15.322	5.62e-13	5.99e-12	19.753	65012	SLC26A10	solute carrier family 26 member 10 [Source:HGNC Symbol;Acc:HGNC:14470]	12	57619527	57626151	1
ENSG00000250654	-1.75063	0.297173	0.587459	-9.19841	7.23e-09	3.18e-08	10.3908		RP11-834C11.7		12	54076838	54081903	-1
ENSG00000267226	-1.75056	0.297187	-0.242518	-6.81581	9.01e-07	2.7e-06	5.64926		RP11-126O1.5		18	58670009	58671877	-1
ENSG00000088882	-1.74966	0.297373	7.35434	-29.7669	7.7e-19	4.29e-17	32.8907	56265	CPXM1	carboxypeptidase X, M14 family member 1 [Source:HGNC Symbol;Acc:HGNC:15771]	20	2794069	2800637	-1
ENSG00000261220	-1.74764	0.297788	-0.588766	-6.25955	3.09e-06	8.44e-06	4.46534		RP11-629O1.2		8	133573183	133573861	1
ENSG00000137193	-1.74532	0.298267	3.14557	-18.8177	9.43e-15	1.57e-13	23.7839	5292	PIM1	Pim-1 proto-oncogene, serine/threonine kinase [Source:HGNC Symbol;Acc:HGNC:8986]	6	37170203	37175426	1
ENSG00000263271	-1.74522	0.298287	0.192444	-9.17372	7.57e-09	3.32e-08	10.3997		RP11-1055B8.8		17	81461013	81461937	-1
ENSG00000122756	-1.74462	0.298413	2.12767	-9.63701	3.22e-09	1.52e-08	10.9131	1271	CNTFR	ciliary neurotrophic factor receptor [Source:HGNC Symbol;Acc:HGNC:2170]	9	34551432	34590140	-1
ENSG00000107742	-1.74441	0.298455	-0.235989	-7.68635	1.42e-07	4.88e-07	7.50871	9806	SPOCK2	sparc/osteonectin, cwcv and kazal-like domains proteoglycan (testican) 2 [Source:HGNC Symbol;Acc:HGNC:13564]	10	72059035	72089032	-1
ENSG00000242265	-1.74317	0.298712	8.73241	-54.7027	2.15e-24	8e-22	46.0168	23089	PEG10	paternally expressed 10 [Source:HGNC Symbol;Acc:HGNC:14005]	7	94656325	94669695	1
ENSG00000100889	-1.74252	0.298847	3.43151	-23.756	8.2e-17	2.41e-15	28.5896	5106	PCK2	phosphoenolpyruvate carboxykinase 2, mitochondrial [Source:HGNC Symbol;Acc:HGNC:8725]	14	24094053	24110598	1
ENSG00000218690	-1.73719	0.299954	-0.2218	-7.50535	2.06e-07	6.92e-07	7.12723		HIST1H2APS4	histone cluster 1, H2a, pseudogene 4 [Source:HGNC Symbol;Acc:HGNC:4732]	6	26272021	26272701	-1
ENSG00000116017	-1.7371	0.299971	6.32006	-29.7901	7.58e-19	4.23e-17	32.9941	1820	ARID3A	AT-rich interaction domain 3A [Source:HGNC Symbol;Acc:HGNC:3031]	19	925781	975934	1
ENSG00000181773	-1.73239	0.300953	2.16066	-16.2709	1.72e-13	2.08e-12	20.9727	2827	GPR3	G protein-coupled receptor 3 [Source:HGNC Symbol;Acc:HGNC:4484]	1	27392644	27395814	1
ENSG00000156535	-1.73095	0.301253	1.39638	-11.8188	8.07e-11	5.31e-10	14.8275	135228	CD109	CD109 molecule [Source:HGNC Symbol;Acc:HGNC:21685]	6	73695785	73828316	1
ENSG00000163661	-1.72565	0.302362	2.61882	-16.4106	1.45e-13	1.81e-12	21.0744	5806	PTX3	pentraxin 3 [Source:HGNC Symbol;Acc:HGNC:9692]	3	157436789	157443628	1
ENSG00000170396	-1.72287	0.302946	2.78171	-16.0254	2.32e-13	2.74e-12	20.564	91752	ZNF804A	zinc finger protein 804A [Source:HGNC Symbol;Acc:HGNC:21711]	2	184598366	184939492	1
ENSG00000166341	-1.7221	0.303108	5.73195	-35.2434	2.26e-20	1.97e-18	36.6791	8642	DCHS1	dachsous cadherin-related 1 [Source:HGNC Symbol;Acc:HGNC:13681]	11	6621323	6655854	-1
ENSG00000125398	-1.72085	0.303369	5.04089	-23.1181	1.43e-16	3.96e-15	27.7474	6662	SOX9	SRY-box 9 [Source:HGNC Symbol;Acc:HGNC:11204]	17	72121020	72126420	1
ENSG00000181409	-1.71922	0.303713	0.0150687	-8.26311	4.39e-08	1.66e-07	8.65003	9625	AATK	apoptosis associated tyrosine kinase [Source:HGNC Symbol;Acc:HGNC:21]	17	81117295	81166077	-1
ENSG00000142669	-1.71525	0.30455	5.24984	-32.5196	1.22e-19	8.49e-18	35.0066	83442	SH3BGRL3	SH3 domain binding glutamate rich protein like 3 [Source:HGNC Symbol;Acc:HGNC:15568]	1	26279176	26281522	1
ENSG00000130413	-1.715	0.304603	3.18363	-21.8048	4.75e-16	1.13e-14	26.8313	65975	STK33	serine/threonine kinase 33 [Source:HGNC Symbol;Acc:HGNC:14568]	11	8391868	8594289	-1
ENSG00000247416	-1.71392	0.304831	1.37176	-11.2749	1.93e-10	1.16e-09	13.9441	101928847	RP11-629G13.1		11	112959279	112963460	-1
ENSG00000108379	-1.71214	0.305206	3.18244	-17.5879	3.66e-14	5.22e-13	22.3844	7473 101929777	WNT3	Wnt family member 3 [Source:HGNC Symbol;Acc:HGNC:12782]	17	46762506	46833154	-1
ENSG00000074964	-1.71208	0.305219	4.02638	-24.7063	3.66e-17	1.23e-15	29.3277	55160	ARHGEF10L	Rho guanine nucleotide exchange factor 10 like [Source:HGNC Symbol;Acc:HGNC:25540]	1	17539835	17697874	1
ENSG00000273090	-1.71201	0.305235	-0.123871	-7.40682	2.54e-07	8.37e-07	6.90458		RP11-78I14.1		2	36513255	36513732	-1
ENSG00000274428	-1.71187	0.305265	0.471885	-8.56647	2.42e-08	9.6e-08	9.18485		U1	U1 spliceosomal RNA [Source:RFAM;Acc:RF00003]	1	146409903	146410062	1
ENSG00000137266	-1.70775	0.306137	3.63517	-20.6641	1.42e-15	2.93e-14	25.6387	63027	SLC22A23	solute carrier family 22 member 23 [Source:HGNC Symbol;Acc:HGNC:21106]	6	3268962	3457022	-1
ENSG00000243444	-1.70721	0.306251	2.1483	-13.5261	6.3e-12	5.32e-11	17.2996	114299	PALM2	paralemmin 2 [Source:HGNC Symbol;Acc:HGNC:15845]	9	109640788	109946703	1
ENSG00000016391	-1.70629	0.306447	1.2661	-10.9815	3.12e-10	1.8e-09	13.4706	55349	CHDH	choline dehydrogenase [Source:HGNC Symbol;Acc:HGNC:24288]	3	53812335	53846390	-1
ENSG00000139364	-1.70584	0.306542	3.99906	-12.5934	2.45e-11	1.81e-10	15.4866	114795	TMEM132B	transmembrane protein 132B [Source:HGNC Symbol;Acc:HGNC:29397]	12	125186836	125662377	1
ENSG00000227487	-1.70483	0.306757	1.30689	-8.15264	5.48e-08	2.03e-07	8.19375		NCAM1-AS1	NCAM1 antisense RNA1 [Source:HGNC Symbol;Acc:HGNC:48675]	11	113269532	113273901	-1
ENSG00000197558	-1.70425	0.306881	0.567348	-9.55284	3.76e-09	1.75e-08	11.0541	23145	SSPO	SCO-spondin [Source:HGNC Symbol;Acc:HGNC:21998]	7	149776042	149833979	1
ENSG00000198624	-1.70396	0.306943	1.33827	-12.2126	4.37e-11	3.06e-10	15.4578	26112	CCDC69	coiled-coil domain containing 69 [Source:HGNC Symbol;Acc:HGNC:24487]	5	151181052	151224145	-1
ENSG00000230426	-1.70262	0.307228	1.42382	-9.35221	5.43e-09	2.45e-08	10.527		ERVMER61-1	endogenous retrovirus group MER61 member 1 [Source:HGNC Symbol;Acc:HGNC:27919]	1	187641226	187643860	1
ENSG00000231389	-1.70146	0.307475	0.387653	-6.83537	8.63e-07	2.6e-06	5.57918	3113	HLA-DPA1	major histocompatibility complex, class II, DP alpha 1 [Source:HGNC Symbol;Acc:HGNC:4938]	6	33064569	33080775	-1
ENSG00000183722	-1.70097	0.307579	4.46854	-17.9167	2.53e-14	3.78e-13	22.5036	10186	LHFP	lipoma HMGIC fusion partner [Source:HGNC Symbol;Acc:HGNC:6586]	13	39342892	39603528	-1
ENSG00000175093	-1.70064	0.307649	4.46348	-26.3893	9.38e-18	3.75e-16	30.6554	92369	SPSB4	splA/ryanodine receptor domain and SOCS box containing 4 [Source:HGNC Symbol;Acc:HGNC:30630]	3	141051402	141148611	1
ENSG00000172037	-1.69735	0.308351	5.92277	-34.0998	4.51e-20	3.61e-18	35.9469	3913	LAMB2	laminin subunit beta 2 [Source:HGNC Symbol;Acc:HGNC:6487]	3	49121114	49133118	-1
ENSG00000105825	-1.69551	0.308745	0.368645	-8.8308	1.45e-08	5.98e-08	9.71708	7980	TFPI2	tissue factor pathway inhibitor 2 [Source:HGNC Symbol;Acc:HGNC:11761]	7	93885397	93890991	-1
ENSG00000112561	-1.69489	0.308878	0.284615	-7.66647	1.48e-07	5.06e-07	7.38484	7942	TFEB	transcription factor EB [Source:HGNC Symbol;Acc:HGNC:11753]	6	41683978	41736259	-1
ENSG00000129422	-1.69455	0.308952	2.0449	-14.7338	1.21e-12	1.2e-11	19.0042	57509	MTUS1	microtubule associated tumor suppressor 1 [Source:HGNC Symbol;Acc:HGNC:29789]	8	17643795	17800917	-1
ENSG00000146242	-1.69428	0.30901	4.35467	-27.8224	3.14e-18	1.41e-16	31.7953	7162	TPBG	trophoblast glycoprotein [Source:HGNC Symbol;Acc:HGNC:12004]	6	82363206	82370828	1
ENSG00000255390	-1.69298	0.309288	2.5292	-13.2868	8.87e-12	7.23e-11	16.8756		RP11-732A19.5		11	6621451	6622322	1
ENSG00000143434	-1.69293	0.309299	2.23363	-14.0698	2.95e-12	2.69e-11	18.0599	10500	SEMA6C	semaphorin 6C [Source:HGNC Symbol;Acc:HGNC:10740]	1	151131685	151146664	-1
ENSG00000109906	-1.69132	0.309643	1.84505	-12.5605	2.58e-11	1.89e-10	15.9132	7704	ZBTB16	zinc finger and BTB domain containing 16 [Source:HGNC Symbol;Acc:HGNC:12930]	11	114059593	114250676	1
ENSG00000272114	-1.68988	0.309952	0.647894	-9.56252	3.69e-09	1.72e-08	11.0597		RP1-261G23.7		6	43770429	43770616	-1
ENSG00000128564	-1.68811	0.310332	1.55093	-8.44398	3.07e-08	1.19e-07	8.7301	7425	VGF	VGF nerve growth factor inducible [Source:HGNC Symbol;Acc:HGNC:12684]	7	101162509	101165593	-1
ENSG00000163710	-1.6833	0.31137	3.50562	-20.0364	2.65e-15	5.04e-14	25.0171	26577	PCOLCE2	procollagen C-endopeptidase enhancer 2 [Source:HGNC Symbol;Acc:HGNC:8739]	3	142815922	142889203	-1
ENSG00000103187	-1.68161	0.311734	8.26785	-29.0955	1.24e-18	6.47e-17	32.35	23406	COTL1	coactosin like F-actin binding protein 1 [Source:HGNC Symbol;Acc:HGNC:18304]	16	84565594	84618077	-1
ENSG00000109339	-1.68159	0.311738	2.98585	-19.2318	6.08e-15	1.06e-13	24.2556	5602	MAPK10	mitogen-activated protein kinase 10 [Source:HGNC Symbol;Acc:HGNC:6872]	4	86015123	86594131	-1
ENSG00000186854	-1.67944	0.312204	4.3079	-12.2684	4.02e-11	2.83e-10	14.9022	129293 105374836	TRABD2A	TraB domain containing 2A [Source:HGNC Symbol;Acc:HGNC:27013]	2	84821650	84907008	-1
ENSG00000261416	-1.67797	0.312521	0.173079	-7.83895	1.03e-07	3.65e-07	7.76123		RP11-455F5.5		16	30183505	30184957	-1
ENSG00000178498	-1.67552	0.313054	3.69821	-17.4661	4.21e-14	5.93e-13	22.1366	196403	DTX3	deltex E3 ubiquitin ligase 3 [Source:HGNC Symbol;Acc:HGNC:24457]	12	57604622	57609804	1
ENSG00000150540	-1.67485	0.313199	2.54787	-14.075	2.93e-12	2.67e-11	18.0061	3176	HNMT	histamine N-methyltransferase [Source:HGNC Symbol;Acc:HGNC:5028]	2	137964020	138016364	1
ENSG00000062038	-1.67296	0.313609	5.44412	-26.1409	1.14e-17	4.4e-16	30.2968	1001	CDH3	cadherin 3 [Source:HGNC Symbol;Acc:HGNC:1762]	16	68636189	68722616	1
ENSG00000132563	-1.67247	0.313715	4.08106	-20.3459	1.95e-15	3.88e-14	25.2297	51308	REEP2	receptor accessory protein 2 [Source:HGNC Symbol;Acc:HGNC:17975]	5	138439017	138446969	1
ENSG00000049323	-1.67133	0.313964	4.26516	-22.5489	2.39e-16	6.22e-15	27.356	4052	LTBP1	latent transforming growth factor beta binding protein 1 [Source:HGNC Symbol;Acc:HGNC:6714]	2	32946972	33399509	1
ENSG00000104689	-1.6695	0.314363	0.0616689	-5.94389	6.34e-06	1.64e-05	3.62747	8797	TNFRSF10A	TNF receptor superfamily member 10a [Source:HGNC Symbol;Acc:HGNC:11904]	8	23190452	23225126	-1
ENSG00000162390	-1.66838	0.314606	0.946557	-8.36537	3.59e-08	1.38e-07	8.69704	26027	ACOT11	acyl-CoA thioesterase 11 [Source:HGNC Symbol;Acc:HGNC:18156]	1	54542257	54639192	1
ENSG00000060656	-1.66711	0.314883	2.49203	-10.5903	6.03e-10	3.28e-09	12.5446	10076	PTPRU	protein tyrosine phosphatase, receptor type U [Source:HGNC Symbol;Acc:HGNC:9683]	1	29236516	29326813	1
ENSG00000176463	-1.66467	0.315415	0.931391	-9.48052	4.29e-09	1.97e-08	10.8594	28232	SLCO3A1	solute carrier organic anion transporter family member 3A1 [Source:HGNC Symbol;Acc:HGNC:10952]	15	91853695	92172435	1
ENSG00000132031	-1.66437	0.315482	1.63113	-11.4228	1.52e-10	9.37e-10	14.1414	4148	MATN3	matrilin 3 [Source:HGNC Symbol;Acc:HGNC:6909]	2	19992111	20012694	-1
ENSG00000011028	-1.66043	0.316345	5.0083	-21.8584	4.52e-16	1.09e-14	26.5623	9902	MRC2	mannose receptor C type 2 [Source:HGNC Symbol;Acc:HGNC:16875]	17	62627401	62693597	1
ENSG00000183696	-1.65975	0.316494	2.23575	-12.2202	4.32e-11	3.03e-10	15.3075	7378	UPP1	uridine phosphorylase 1 [Source:HGNC Symbol;Acc:HGNC:12576]	7	48088628	48108733	1
ENSG00000115758	-1.65939	0.316573	7.58473	-34.7142	3.11e-20	2.62e-18	36.2017	4953	ODC1	ornithine decarboxylase 1 [Source:HGNC Symbol;Acc:HGNC:8109]	2	10439968	10448504	-1
ENSG00000114923	-1.65899	0.316661	1.7892	-12.5458	2.64e-11	1.93e-10	15.899	6508	SLC4A3	solute carrier family 4 member 3 [Source:HGNC Symbol;Acc:HGNC:11029]	2	219627327	219641980	1
ENSG00000120093	-1.65887	0.316687	5.39859	-30.2365	5.56e-19	3.28e-17	33.4221	3213	HOXB3	homeobox B3 [Source:HGNC Symbol;Acc:HGNC:5114]	17	48548870	48604912	-1
ENSG00000124575	-1.65835	0.316802	7.82186	-39.3	2.3e-21	2.85e-19	38.8805	3007	HIST1H1D	histone cluster 1, H1d [Source:HGNC Symbol;Acc:HGNC:4717]	6	26234268	26234933	-1
ENSG00000068137	-1.65775	0.316933	3.5388	-17.239	5.46e-14	7.46e-13	21.8993	79990	PLEKHH3	pleckstrin homology, MyTH4 and FERM domain containing H3 [Source:HGNC Symbol;Acc:HGNC:26105]	17	42667914	42676994	-1
ENSG00000078018	-1.65676	0.31715	6.59379	-25.3776	2.1e-17	7.67e-16	29.5178	4133	MAP2	microtubule associated protein 2 [Source:HGNC Symbol;Acc:HGNC:6839]	2	209424058	209734118	1
ENSG00000137573	-1.65458	0.31763	5.42603	-9.70443	2.85e-09	1.36e-08	10.24	23213	SULF1	sulfatase 1 [Source:HGNC Symbol;Acc:HGNC:20391]	8	69466624	69660915	1
ENSG00000277363	-1.65418	0.317718	1.49087	-10.7389	4.69e-10	2.61e-09	13.015	80725	SRCIN1	SRC kinase signaling inhibitor 1 [Source:HGNC Symbol;Acc:HGNC:29506]	17	38530016	38605930	-1
ENSG00000217416	-1.65384	0.317794	0.903481	-9.62187	3.31e-09	1.56e-08	11.1262		ISCA1P1	iron-sulfur cluster assembly 1 pseudogene 1 [Source:HGNC Symbol;Acc:HGNC:33263]	5	62776877	62777263	-1
ENSG00000069188	-1.65152	0.318305	4.46131	-19.0569	7.31e-15	1.26e-13	23.7851	54549	SDK2	sidekick cell adhesion molecule 2 [Source:HGNC Symbol;Acc:HGNC:19308]	17	73334384	73644089	-1
ENSG00000106991	-1.64735	0.319226	0.887628	-6.88601	7.73e-07	2.35e-06	5.58641	2022	ENG	endoglin [Source:HGNC Symbol;Acc:HGNC:3349]	9	127815012	127854756	-1
ENSG00000151012	-1.64478	0.319796	6.52807	-35.4354	2.02e-20	1.79e-18	36.7166	23657	SLC7A11	solute carrier family 7 member 11 [Source:HGNC Symbol;Acc:HGNC:11059]	4	138164097	138242349	-1
ENSG00000228421	-1.6434	0.320102	3.53401	-14.4476	1.77e-12	1.7e-11	18.3105		AC005013.5		7	28957667	28959345	1
ENSG00000150938	-1.64246	0.32031	4.31514	-22.5177	2.46e-16	6.38e-15	27.3157	51232	CRIM1	cysteine rich transmembrane BMP regulator 1 [Source:HGNC Symbol;Acc:HGNC:2359]	2	36355926	36551135	1
ENSG00000225075	-1.64176	0.320465	1.37078	-9.83448	2.26e-09	1.1e-08	11.4315		RP11-426L16.3		1	112693688	112696621	-1
ENSG00000128268	-1.64157	0.320508	3.99224	-19.0381	7.46e-15	1.28e-13	23.8587	4248	MGAT3	mannosyl (beta-1,4-)-glycoprotein beta-1,4-N-acetylglucosaminyltransferase [Source:HGNC Symbol;Acc:HGNC:7046]	22	39457344	39492194	1
ENSG00000079102	-1.63984	0.320892	0.174845	-6.46315	1.96e-06	5.53e-06	4.78784	862	RUNX1T1	RUNX1 translocation partner 1 [Source:HGNC Symbol;Acc:HGNC:1535]	8	91954967	92103286	-1
ENSG00000151948	-1.63634	0.321673	0.119023	-8.49625	2.77e-08	1.09e-07	9.09648	144423	GLT1D1	glycosyltransferase 1 domain containing 1 [Source:HGNC Symbol;Acc:HGNC:26483]	12	128853427	128984968	1
ENSG00000113739	-1.63341	0.322326	1.04888	-11.8403	7.8e-11	5.16e-10	14.9087	8614	STC2	stanniocalcin 2 [Source:HGNC Symbol;Acc:HGNC:11374]	5	173314713	173329503	-1
ENSG00000230729	-1.63245	0.322541	-0.225192	-7.69627	1.39e-07	4.79e-07	7.5236		RP11-296L22.8		9	34521527	34524241	1
ENSG00000173805	-1.63185	0.322675	0.0135989	-9.30947	5.88e-09	2.63e-08	10.6722	9001	HAP1	huntingtin associated protein 1 [Source:HGNC Symbol;Acc:HGNC:4812]	17	41717742	41734644	-1
ENSG00000250033	-1.6298	0.323132	3.59692	-20.052	2.61e-15	4.98e-14	25.0137	641364	SLC7A11-AS1	SLC7A11 antisense RNA 1 [Source:HGNC Symbol;Acc:HGNC:44064]	4	138057464	138178177	1
ENSG00000205002	-1.62824	0.323484	1.20784	-10.0128	1.64e-09	8.24e-09	11.7851	441376	AARD	alanine and arginine rich domain containing protein [Source:HGNC Symbol;Acc:HGNC:33842]	8	116938199	116944487	1
ENSG00000198929	-1.62802	0.323533	0.958989	-9.77726	2.5e-09	1.2e-08	11.4013	9722	NOS1AP	nitric oxide synthase 1 adaptor protein [Source:HGNC Symbol;Acc:HGNC:16859]	1	162069774	162370475	1
ENSG00000085552	-1.62688	0.323788	1.88866	-11.6006	1.14e-10	7.23e-10	14.3825	57549	IGSF9	immunoglobulin superfamily member 9 [Source:HGNC Symbol;Acc:HGNC:18132]	1	159927039	159945604	-1
ENSG00000166924	-1.62535	0.324131	1.01029	-9.27271	6.29e-09	2.8e-08	10.4538	222950	NYAP1	neuronal tyrosine phosphorylated phosphoinositide-3-kinase adaptor 1 [Source:HGNC Symbol;Acc:HGNC:22009]	7	100483927	100494799	1
ENSG00000072135	-1.62483	0.324249	2.50217	-17.1873	5.8e-14	7.86e-13	22.0264	26469	PTPN18	protein tyrosine phosphatase, non-receptor type 18 [Source:HGNC Symbol;Acc:HGNC:9649]	2	130356007	130375409	1
ENSG00000243696	-1.62418	0.324393	3.79911	-14.0435	3.06e-12	2.77e-11	17.6811		RP5-966M1.6		3	52813282	52835729	-1
ENSG00000174628	-1.62312	0.324632	3.51388	-17.3705	4.69e-14	6.53e-13	22.0573	124152	IQCK	IQ motif containing K [Source:HGNC Symbol;Acc:HGNC:28556]	16	19716456	19858467	1
ENSG00000255690	-1.62176	0.324938	6.83315	-24.6307	3.9e-17	1.3e-15	28.8548	9865	TRIL	TLR4 interactor with leucine rich repeats [Source:HGNC Symbol;Acc:HGNC:22200]	7	28953358	28958292	-1
ENSG00000117245	-1.61953	0.325442	-0.274821	-7.12768	4.59e-07	1.45e-06	6.32649	57576	KIF17	kinesin family member 17 [Source:HGNC Symbol;Acc:HGNC:19167]	1	20664014	20718017	-1
ENSG00000181541	-1.61879	0.32561	0.0783067	-7.35658	2.82e-07	9.23e-07	6.76131	10586	MAB21L2	mab-21 like 2 [Source:HGNC Symbol;Acc:HGNC:6758]	4	150581922	150584693	1
ENSG00000095587	-1.61665	0.326091	0.787732	-9.14813	7.94e-09	3.47e-08	10.2564	7093	TLL2	tolloid like 2 [Source:HGNC Symbol;Acc:HGNC:11844]	10	96364606	96513918	-1
ENSG00000140092	-1.61282	0.326959	0.351491	-8.30823	4.02e-08	1.53e-07	8.68567	10516	FBLN5	fibulin 5 [Source:HGNC Symbol;Acc:HGNC:3602]	14	91869412	91947987	-1
ENSG00000172461	-1.61155	0.327247	2.29052	-14.9417	9.18e-13	9.37e-12	19.2387	10690	FUT9	fucosyltransferase 9 [Source:HGNC Symbol;Acc:HGNC:4020]	6	96015984	96215612	1
ENSG00000264014	-1.60884	0.327861	-0.359042	-4.19837	0.000394156	0.000771202	-0.411375	100422914	MIR4253	microRNA 4253 [Source:HGNC Symbol;Acc:HGNC:38231]	1	22863159	22863226	-1
ENSG00000280087	-1.60808	0.328034	0.0286131	-8.12326	5.81e-08	2.14e-07	8.36258		CTB-129P6.7		19	44909375	44914968	1
ENSG00000159239	-1.60768	0.328126	0.177379	-7.38836	2.64e-07	8.68e-07	6.81094	388963	C2orf81	chromosome 2 open reading frame 81 [Source:HGNC Symbol;Acc:HGNC:34350]	2	74393836	74421662	-1
ENSG00000282164	-1.60489	0.328761	1.43429	-11.6665	1.03e-10	6.58e-10	14.5704		PEG13	paternally expressed 13 [Source:HGNC Symbol;Acc:HGNC:19969]	8	140094894	140100560	-1
ENSG00000169231	-1.60378	0.329013	4.80851	-22.6145	2.25e-16	5.92e-15	27.3141	7059	THBS3	thrombospondin 3 [Source:HGNC Symbol;Acc:HGNC:11787]	1	155195588	155209051	-1
ENSG00000253554	-1.60357	0.329063	-0.256256	-8.0234	7.11e-08	2.58e-07	8.19928	102724623	RP11-32K4.1		8	63687179	64368558	-1
ENSG00000160606	-1.60326	0.329133	2.55895	-17.0307	6.96e-14	9.28e-13	21.8301	116238	TLCD1	TLC domain containing 1 [Source:HGNC Symbol;Acc:HGNC:25177]	17	28724348	28727935	-1
ENSG00000083857	-1.60322	0.329141	8.51402	-44.0315	2.1e-22	3.8e-20	41.3211	2195	FAT1	FAT atypical cadherin 1 [Source:HGNC Symbol;Acc:HGNC:3595]	4	186587783	186726722	-1
ENSG00000168917	-1.602	0.32942	2.32037	-13.7505	4.6e-12	4.01e-11	17.5843	80723	SLC35G2	solute carrier family 35 member G2 [Source:HGNC Symbol;Acc:HGNC:28480]	3	136818647	136855892	1
ENSG00000197757	-1.60099	0.32965	3.79297	-23.7998	7.9e-17	2.33e-15	28.5696	3223	HOXC6	homeobox C6 [Source:HGNC Symbol;Acc:HGNC:5128]	12	53990624	54030823	1
ENSG00000142700	-1.59851	0.330217	0.668602	-9.30208	5.96e-09	2.67e-08	10.5665	63950	DMRTA2	DMRT like family A2 [Source:HGNC Symbol;Acc:HGNC:13908]	1	50417550	50423500	-1
ENSG00000119938	-1.59594	0.330806	0.376546	-8.24341	4.57e-08	1.72e-07	8.55053	5507	PPP1R3C	protein phosphatase 1 regulatory subunit 3C [Source:HGNC Symbol;Acc:HGNC:9293]	10	91628442	91633054	-1
ENSG00000110042	-1.59488	0.331049	4.87047	-14.9018	9.68e-13	9.8e-12	18.6327	23220	DTX4	deltex E3 ubiquitin ligase 4 [Source:HGNC Symbol;Acc:HGNC:29151]	11	59171430	59208587	1
ENSG00000019102	-1.59196	0.331721	0.900247	-10.3895	8.51e-10	4.49e-09	12.505	23584	VSIG2	V-set and immunoglobulin domain containing 2 [Source:HGNC Symbol;Acc:HGNC:17149]	11	124747472	124752238	-1
ENSG00000120820	-1.59115	0.331907	3.09794	-17.2426	5.44e-14	7.43e-13	21.9864	83468	GLT8D2	glycosyltransferase 8 domain containing 2 [Source:HGNC Symbol;Acc:HGNC:24890]	12	103988984	104064183	-1
ENSG00000158966	-1.5899	0.332195	5.72117	-32.5324	1.21e-19	8.45e-18	34.9512	57685	CACHD1	cache domain containing 1 [Source:HGNC Symbol;Acc:HGNC:29314]	1	64470792	64693058	1
ENSG00000102349	-1.58923	0.332349	2.18212	-10.5074	6.95e-10	3.73e-09	12.4641	11279	KLF8	Kruppel like factor 8 [Source:HGNC Symbol;Acc:HGNC:6351]	X	56232421	56287889	1
ENSG00000203952	-1.58508	0.333306	2.599	-13.8808	3.83e-12	3.4e-11	17.7146	347475	CCDC160	coiled-coil domain containing 160 [Source:HGNC Symbol;Acc:HGNC:37286]	X	134237047	134246207	1
ENSG00000110811	-1.58367	0.333632	4.849	-30.5975	4.34e-19	2.62e-17	33.7481	10536	P3H3	prolyl 3-hydroxylase 3 [Source:HGNC Symbol;Acc:HGNC:19318]	12	6828410	6839851	1
ENSG00000259024	-1.58033	0.334406	3.60287	-22.0345	3.83e-16	9.46e-15	26.9801	100533496	TVP23C-CDRT4	TVP23C-CDRT4 readthrough [Source:HGNC Symbol;Acc:HGNC:42961]	17	15436021	15563561	-1
ENSG00000165379	-1.5801	0.33446	2.25996	-15.0964	7.51e-13	7.78e-12	19.4481	145581	LRFN5	leucine rich repeat and fibronectin type III domain containing 5 [Source:HGNC Symbol;Acc:HGNC:20360]	14	41607570	41904549	1
ENSG00000253552	-1.58002	0.334478	3.27464	-17.6031	3.6e-14	5.15e-13	22.3759		HOXA-AS2	HOXA cluster antisense RNA 2 [Source:HGNC Symbol;Acc:HGNC:43745]	7	27107777	27134302	1
ENSG00000265972	-1.57915	0.334678	5.61043	-11.9207	6.87e-11	4.6e-10	14.063	10628	TXNIP	thioredoxin interacting protein [Source:HGNC Symbol;Acc:HGNC:16952]	1	145992435	145996600	-1
ENSG00000089472	-1.57887	0.334743	4.26191	-24.4623	4.49e-17	1.46e-15	29.0724	9843	HEPH	hephaestin [Source:HGNC Symbol;Acc:HGNC:4866]	X	66162549	66268867	1
ENSG00000010704	-1.57757	0.335046	1.43272	-10.4709	7.4e-10	3.95e-09	12.5556	3077	HFE	hemochromatosis [Source:HGNC Symbol;Acc:HGNC:4886]	6	26087281	26098343	1
ENSG00000121039	-1.57725	0.33512	3.69844	-20.3323	1.97e-15	3.92e-14	25.2815	157506	RDH10	retinol dehydrogenase 10 (all-trans) [Source:HGNC Symbol;Acc:HGNC:19975]	8	73294612	73325281	1
ENSG00000260577	-1.57643	0.33531	2.5448	-13.562	5.99e-12	5.08e-11	17.2666		RP11-615I2.2		16	68644248	68646168	-1
ENSG00000154146	-1.57556	0.335512	2.55273	-14.5212	1.6e-12	1.55e-11	18.6195	4900	NRGN	neurogranin [Source:HGNC Symbol;Acc:HGNC:8000]	11	124739846	124747210	1
ENSG00000115380	-1.57477	0.335697	0.840914	-7.855	1e-07	3.54e-07	7.6687	2202	EFEMP1	EGF containing fibulin like extracellular matrix protein 1 [Source:HGNC Symbol;Acc:HGNC:3218]	2	55865967	55924139	-1
ENSG00000100968	-1.57184	0.336378	4.85131	-16.9393	7.74e-14	1.02e-12	21.2551	4776	NFATC4	nuclear factor of activated T-cells 4 [Source:HGNC Symbol;Acc:HGNC:7778]	14	24365673	24379604	1
ENSG00000014914	-1.57136	0.336491	1.90537	-11.9211	6.87e-11	4.6e-10	14.8933	10903	MTMR11	myotubularin related protein 11 [Source:HGNC Symbol;Acc:HGNC:24307]	1	149928651	149936898	-1
ENSG00000231064	-1.57027	0.336745	3.66596	-15.8651	2.83e-13	3.26e-12	20.1669	693235	MIR92B	microRNA 92b [Source:HGNC Symbol;Acc:HGNC:32920]	1	155195004	155205495	1
ENSG00000174130	-1.56777	0.337328	-0.317636	-8.29221	4.15e-08	1.57e-07	8.74703	10333	TLR6	toll like receptor 6 [Source:HGNC Symbol;Acc:HGNC:16711]	4	38823715	38856817	-1
ENSG00000174460	-1.56698	0.337514	1.77019	-9.8867	2.06e-09	1.01e-08	11.4409	170261	ZCCHC12	zinc finger CCHC-type containing 12 [Source:HGNC Symbol;Acc:HGNC:27273]	X	118823790	118826968	1
ENSG00000187266	-1.56417	0.338173	1.58274	-10.5954	5.98e-10	3.26e-09	12.7436	2057	EPOR	erythropoietin receptor [Source:HGNC Symbol;Acc:HGNC:3416]	19	11377205	11384342	-1
ENSG00000111907	-1.56415	0.338176	3.30322	-17.9886	2.33e-14	3.52e-13	22.8154	7164	TPD52L1	tumor protein D52-like 1 [Source:HGNC Symbol;Acc:HGNC:12006]	6	125119049	125264407	1
ENSG00000280219	-1.56176	0.338737	0.922271	-9.05191	9.52e-09	4.09e-08	10.0461		RP11-752L20.3		4	147487971	147496062	1
ENSG00000152076	-1.5615	0.338798	1.61238	-9.43587	4.65e-09	2.13e-08	10.6377	91409	CCDC74B	coiled-coil domain containing 74B [Source:HGNC Symbol;Acc:HGNC:25267]	2	130139287	130145134	-1
ENSG00000162654	-1.56093	0.338932	0.814778	-8.12407	5.8e-08	2.14e-07	8.22792	115361	GBP4	guanylate binding protein 4 [Source:HGNC Symbol;Acc:HGNC:20480]	1	89181148	89198932	-1
ENSG00000086300	-1.56046	0.339044	3.13344	-16.5272	1.26e-13	1.6e-12	21.1113	29887	SNX10	sorting nexin 10 [Source:HGNC Symbol;Acc:HGNC:14974]	7	26291895	26374329	1
ENSG00000123146	-1.55954	0.339258	1.42194	-9.446	4.57e-09	2.09e-08	10.6975	976	ADGRE5	adhesion G protein-coupled receptor E5 [Source:HGNC Symbol;Acc:HGNC:1711]	19	14380501	14408725	1
ENSG00000236671	-1.55937	0.3393	0.464296	-7.3604	2.8e-07	9.16e-07	6.69772		PRKG1-AS1	PRKG1 antisense RNA 1 [Source:HGNC Symbol;Acc:HGNC:45029]	10	52230742	52314128	-1
ENSG00000129521	-1.55847	0.33951	0.847911	-9.1471	7.96e-09	3.47e-08	10.2408	112399	EGLN3	egl-9 family hypoxia inducible factor 3 [Source:HGNC Symbol;Acc:HGNC:14661]	14	33924231	34462774	-1
ENSG00000267751	-1.55772	0.339687	1.60373	-10.1894	1.2e-09	6.19e-09	12.0233		AC009005.2		19	567210	572228	-1
ENSG00000173482	-1.55738	0.339767	3.11341	-18.2206	1.8e-14	2.8e-13	23.1141	5797	PTPRM	protein tyrosine phosphatase, receptor type M [Source:HGNC Symbol;Acc:HGNC:9675]	18	7566782	8406861	1
ENSG00000002746	-1.55712	0.33983	0.410304	-8.95607	1.14e-08	4.81e-08	9.94717	23072	HECW1	HECT, C2 and WW domain containing E3 ubiquitin protein ligase 1 [Source:HGNC Symbol;Acc:HGNC:22195]	7	43112599	43566001	1
ENSG00000146233	-1.55573	0.340157	0.356157	-7.37425	2.72e-07	8.92e-07	6.74731	51302	CYP39A1	cytochrome P450 family 39 subfamily A member 1 [Source:HGNC Symbol;Acc:HGNC:17449]	6	46549580	46652830	-1
ENSG00000115468	-1.55517	0.340287	1.01937	-6.58338	1.5e-06	4.32e-06	4.87842	80303	EFHD1	EF-hand domain family member D1 [Source:HGNC Symbol;Acc:HGNC:29556]	2	232606057	232682781	1
ENSG00000279694	-1.55458	0.340427	2.76463	-12.7883	1.84e-11	1.4e-10	16.0657		RP11-5O23.2		15	78339208	78341757	-1
ENSG00000135070	-1.55412	0.340537	4.16519	-23.9307	7.05e-17	2.12e-15	28.6223	81689	ISCA1	iron-sulfur cluster assembly 1 [Source:HGNC Symbol;Acc:HGNC:28660]	9	86264546	86283102	-1
ENSG00000274721	-1.55406	0.34055	0.76495	-7.26078	3.45e-07	1.11e-06	6.42393		SPRY4-IT1_2	SPRY4-IT1 conserved region 2 [Source:RFAM;Acc:RF02039]	5	142318047	142318167	1
ENSG00000124145	-1.5527	0.340872	3.5617	-20.2937	2.05e-15	4.03e-14	25.2654	6385	SDC4	syndecan 4 [Source:HGNC Symbol;Acc:HGNC:10661]	20	45325288	45348424	-1
ENSG00000149294	-1.54825	0.341925	5.82473	-13.6715	5.13e-12	4.43e-11	16.7197	4684	NCAM1	neural cell adhesion molecule 1 [Source:HGNC Symbol;Acc:HGNC:7656]	11	112961247	113278436	1
ENSG00000186976	-1.54776	0.342042	0.094763	-6.78531	9.63e-07	2.87e-06	5.51554	64800	EFCAB6	EF-hand calcium binding domain 6 [Source:HGNC Symbol;Acc:HGNC:24204]	22	43528744	43812337	-1
ENSG00000168785	-1.54557	0.34256	5.02524	-30.4731	4.73e-19	2.84e-17	33.6345	10098	TSPAN5	tetraspanin 5 [Source:HGNC Symbol;Acc:HGNC:17753]	4	98470367	98658629	-1
ENSG00000186815	-1.54451	0.342812	2.06614	-11.2734	1.93e-10	1.17e-09	13.8004	53373	TPCN1	two pore segment channel 1 [Source:HGNC Symbol;Acc:HGNC:18182]	12	113221050	113298585	1
ENSG00000130038	-1.54427	0.342869	-0.123107	-7.44995	2.32e-07	7.7e-07	6.98844	84766	CRACR2A	calcium release activated channel regulator 2A [Source:HGNC Symbol;Acc:HGNC:28657]	12	3606633	3764819	-1
ENSG00000135116	-1.54383	0.342974	-0.0177838	-6.34121	2.58e-06	7.12e-06	4.5446	8739	HRK	harakiri, BCL2 interacting protein [Source:HGNC Symbol;Acc:HGNC:5185]	12	116856144	116881441	-1
ENSG00000113580	-1.54177	0.343464	4.20624	-24.4426	4.56e-17	1.48e-15	29.0622	2908	NR3C1	nuclear receptor subfamily 3 group C member 1 [Source:HGNC Symbol;Acc:HGNC:7978]	5	143277931	143435512	-1
ENSG00000157216	-1.54172	0.343477	4.70909	-29.0281	1.3e-18	6.72e-17	32.6405	23648	SSBP3	single stranded DNA binding protein 3 [Source:HGNC Symbol;Acc:HGNC:15674]	1	54225432	54413479	-1
ENSG00000075275	-1.54043	0.343782	3.04298	-9.98076	1.74e-09	8.66e-09	11.3063	9620	CELSR1	cadherin EGF LAG seven-pass G-type receptor 1 [Source:HGNC Symbol;Acc:HGNC:1850]	22	46360834	46537170	-1
ENSG00000275155	-1.53861	0.344216	-0.251107	-7.25975	3.46e-07	1.12e-06	6.60408		CTD-2595P9.4		16	49847018	49847632	-1
ENSG00000163406	-1.53745	0.344493	1.18301	-10.6581	5.37e-10	2.95e-09	12.9239	6565	SLC15A2	solute carrier family 15 member 2 [Source:HGNC Symbol;Acc:HGNC:10921]	3	121894089	121944102	1
ENSG00000130203	-1.53671	0.344671	4.92412	-21.7333	5.08e-16	1.2e-14	26.4482	348	APOE	apolipoprotein E [Source:HGNC Symbol;Acc:HGNC:613]	19	44905754	44909393	1
ENSG00000101224	-1.5362	0.344791	5.06826	-29.9775	6.65e-19	3.8e-17	33.2768	994	CDC25B	cell division cycle 25B [Source:HGNC Symbol;Acc:HGNC:1726]	20	3786772	3806121	1
ENSG00000119547	-1.53541	0.344981	1.26986	-10.7395	4.68e-10	2.61e-09	13.0496	9480	ONECUT2	one cut homeobox 2 [Source:HGNC Symbol;Acc:HGNC:8139]	18	57435685	57491297	1
ENSG00000176971	-1.53471	0.345149	0.729579	-7.05375	5.38e-07	1.68e-06	5.98261	387758	FIBIN	fin bud initiation factor homolog (zebrafish) [Source:HGNC Symbol;Acc:HGNC:33747]	11	26994184	26996121	1
ENSG00000093072	-1.53363	0.345407	-0.0825162	-6.05795	4.89e-06	1.29e-05	3.91228	51816	CECR1	cat eye syndrome chromosome region, candidate 1 [Source:HGNC Symbol;Acc:HGNC:1839]	22	17178790	17221989	-1
ENSG00000148908	-1.53089	0.346064	0.517885	-8.34877	3.71e-08	1.42e-07	8.73484	6001	RGS10	regulator of G-protein signaling 10 [Source:HGNC Symbol;Acc:HGNC:9992]	10	119499828	119542708	-1
ENSG00000229670	-1.52992	0.346296	0.979401	-9.4099	4.88e-09	2.22e-08	10.7125		PKP4P1	plakophilin 4 pseudogene 1 [Source:HGNC Symbol;Acc:HGNC:42661]	2	209178966	209181123	1
ENSG00000166426	-1.52509	0.347457	4.03867	-13.6399	5.37e-12	4.6e-11	17.0369	1381	CRABP1	cellular retinoic acid binding protein 1 [Source:HGNC Symbol;Acc:HGNC:2338]	15	78340324	78348230	1
ENSG00000228741	-1.5232	0.347914	-0.0309728	-6.21487	3.42e-06	9.27e-06	4.25911	221178	SPATA13	spermatogenesis associated 13 [Source:EntrezGene;Acc:221178]	13	23979810	24035027	1
ENSG00000182809	-1.5228	0.348009	3.97895	-15.3619	5.34e-13	5.73e-12	19.4393	1397	CRIP2	cysteine rich protein 2 [Source:HGNC Symbol;Acc:HGNC:2361]	14	105472962	105480170	1
ENSG00000187134	-1.52175	0.348264	1.9834	-10.665	5.31e-10	2.93e-09	12.7789	1645	AKR1C1	aldo-keto reductase family 1 member C1 [Source:HGNC Symbol;Acc:HGNC:384]	10	4963253	4983283	1
ENSG00000232021	-1.52132	0.348368	3.48693	-15.491	4.53e-13	4.95e-12	19.7179	641518	LEF1-AS1	LEF1 antisense RNA 1 [Source:HGNC Symbol;Acc:HGNC:40339]	4	108167525	108256836	1
ENSG00000202408	-1.52039	0.348592	0.767816	-8.42665	3.18e-08	1.23e-07	8.84693		RNU1-122P	RNA, U1 small nuclear 122, pseudogene [Source:HGNC Symbol;Acc:HGNC:48464]	1	148334612	148334767	-1
ENSG00000109794	-1.51507	0.349879	0.854204	-8.56218	2.44e-08	9.67e-08	9.09993	25854	FAM149A	family with sequence similarity 149 member A [Source:HGNC Symbol;Acc:HGNC:24527]	4	186104419	186172667	1
ENSG00000173320	-1.51443	0.350036	4.28441	-20.759	1.29e-15	2.69e-14	25.6013	56977	STOX2	storkhead box 2 [Source:HGNC Symbol;Acc:HGNC:25450]	4	183798022	184023526	1
ENSG00000003436	-1.51392	0.350158	1.64972	-11.7953	8.37e-11	5.48e-10	14.7361	7035	TFPI	tissue factor pathway inhibitor [Source:HGNC Symbol;Acc:HGNC:11760]	2	187464230	187565760	-1
ENSG00000124074	-1.51381	0.350184	2.88638	-15.6506	3.7e-13	4.13e-12	20.0518	84080	ENKD1	enkurin domain containing 1 [Source:HGNC Symbol;Acc:HGNC:25246]	16	67662945	67667265	-1
ENSG00000273209	-1.5132	0.350332	0.0439374	-8.24323	4.57e-08	1.72e-07	8.59865		RP11-107N15.1		2	202032770	202033537	-1
ENSG00000181449	-1.51282	0.350425	6.58553	-19.4469	4.86e-15	8.7e-14	23.8593	6657	SOX2	SRY-box 2 [Source:HGNC Symbol;Acc:HGNC:11195]	3	181711924	181714436	1
ENSG00000114541	-1.50654	0.351955	4.18679	-23.7563	8.2e-17	2.41e-15	28.4616	23150	FRMD4B	FERM domain containing 4B [Source:HGNC Symbol;Acc:HGNC:24886]	3	69169990	69542583	-1
ENSG00000139970	-1.50376	0.352632	2.2705	-11.6629	1.03e-10	6.61e-10	14.397	6252	RTN1	reticulon 1 [Source:HGNC Symbol;Acc:HGNC:10467]	14	59595976	59870966	-1
ENSG00000188763	-1.50308	0.3528	0.0368328	-6.90849	7.36e-07	2.24e-06	5.79506	8326	FZD9	frizzled class receptor 9 [Source:HGNC Symbol;Acc:HGNC:4047]	7	73433783	73436120	1
ENSG00000006432	-1.50265	0.352904	3.41789	-16.5873	1.17e-13	1.5e-12	21.1238	4293	MAP3K9	mitogen-activated protein kinase kinase kinase 9 [Source:HGNC Symbol;Acc:HGNC:6861]	14	70722526	70809534	-1
ENSG00000137868	-1.50198	0.35307	6.47162	-33.4069	6.93e-20	5.24e-18	35.4432	64220	STRA6	stimulated by retinoic acid 6 [Source:HGNC Symbol;Acc:HGNC:30650]	15	74179466	74212267	-1
ENSG00000105997	-1.5019	0.353089	3.42429	-15.5789	4.05e-13	4.47e-12	19.8457	3200	HOXA3	homeobox A3 [Source:HGNC Symbol;Acc:HGNC:5104]	7	27106184	27152581	-1
ENSG00000148200	-1.50169	0.353139	4.78625	-27.0453	5.64e-18	2.37e-16	31.1165	2649	NR6A1	nuclear receptor subfamily 6 group A member 1 [Source:HGNC Symbol;Acc:HGNC:7985]	9	124517275	124771310	-1
ENSG00000250479	-1.50015	0.353516	2.32798	-12.6714	2.18e-11	1.63e-10	15.9786	400916	CHCHD10	coiled-coil-helix-coiled-coil-helix domain containing 10 [Source:HGNC Symbol;Acc:HGNC:15559]	22	23765834	23768443	-1
ENSG00000091844	-1.4996	0.353651	2.63632	-14.2539	2.3e-12	2.14e-11	18.2279	26575	RGS17	regulator of G-protein signaling 17 [Source:HGNC Symbol;Acc:HGNC:14088]	6	153004459	153131249	-1
ENSG00000233225	-1.49905	0.353787	4.0253	-25.9861	1.29e-17	4.92e-16	30.3851		AC004987.9		7	39833571	39834718	1
ENSG00000257045	-1.49883	0.353839	-0.2005	-6.91356	7.28e-07	2.22e-06	5.84627		RP11-486F17.1		2	199325310	199329362	1
ENSG00000217289	-1.49856	0.353906	1.50145	-10.0126	1.64e-09	8.24e-09	11.7216		AC018865.5		2	129992889	129994040	1
ENSG00000154309	-1.49765	0.35413	4.76939	-27.6278	3.63e-18	1.6e-16	31.5735	84976	DISP1	dispatched RND transporter family member 1 [Source:HGNC Symbol;Acc:HGNC:19711]	1	222872271	223005995	1
ENSG00000138821	-1.49487	0.354814	4.71636	-18.8978	8.66e-15	1.45e-13	23.5477	64116	SLC39A8	solute carrier family 39 member 8 [Source:HGNC Symbol;Acc:HGNC:20862]	4	102251041	102431258	-1
ENSG00000135736	-1.49332	0.355194	3.05932	-18.0015	2.3e-14	3.47e-13	22.8713	92922	CCDC102A	coiled-coil domain containing 102A [Source:HGNC Symbol;Acc:HGNC:28097]	16	57512178	57536599	-1
ENSG00000162591	-1.49309	0.355252	2.82209	-10.9041	3.55e-10	2.03e-09	12.9966	1953	MEGF6	multiple EGF like domains 6 [Source:HGNC Symbol;Acc:HGNC:3232]	1	3489920	3611495	-1
ENSG00000143847	-1.49187	0.355552	0.400152	-6.13998	4.05e-06	1.09e-05	4.00176	8497	PPFIA4	PTPRF interacting protein alpha 4 [Source:HGNC Symbol;Acc:HGNC:9248]	1	203026498	203078740	1
ENSG00000182916	-1.49151	0.355639	3.2402	-15.681	3.56e-13	4e-12	20.0164	56849	TCEAL7	transcription elongation factor A like 7 [Source:HGNC Symbol;Acc:HGNC:28336]	X	103330196	103332326	1
ENSG00000266074	-1.49079	0.355817	4.87408	-21.2425	8.09e-16	1.8e-14	25.9725	57597	BAHCC1	BAH domain and coiled-coil containing 1 [Source:HGNC Symbol;Acc:HGNC:29279]	17	81395475	81466332	1
ENSG00000180537	-1.48756	0.356614	2.52191	-13.3817	7.74e-12	6.41e-11	17.0029	221687	RNF182	ring finger protein 182 [Source:HGNC Symbol;Acc:HGNC:28522]	6	13924446	13980302	1
ENSG00000178467	-1.48565	0.357088	2.35745	-11.4356	1.49e-10	9.18e-10	14.0025	54681	P4HTM	prolyl 4-hydroxylase, transmembrane [Source:HGNC Symbol;Acc:HGNC:28858]	3	48989886	49007154	1
ENSG00000106004	-1.48416	0.357457	4.37284	-24.6628	3.79e-17	1.27e-15	29.2215	3202	HOXA5	homeobox A5 [Source:HGNC Symbol;Acc:HGNC:5106]	7	27141052	27143668	-1
ENSG00000184515	-1.48402	0.357492	0.466518	-7.01495	5.85e-07	1.81e-06	5.94745	340542	BEX5	brain expressed X-linked 5 [Source:HGNC Symbol;Acc:HGNC:27990]	X	102153708	102156057	-1
ENSG00000205683	-1.48354	0.357611	0.973469	-9.0915	8.84e-09	3.81e-08	10.1075	8110	DPF3	double PHD fingers 3 [Source:HGNC Symbol;Acc:HGNC:17427]	14	72619296	72894116	-1
ENSG00000189212	-1.48256	0.357853	0.512533	-8.50478	2.73e-08	1.07e-07	9.04514		DPY19L2P1	DPY19L2 pseudogene 1 [Source:HGNC Symbol;Acc:HGNC:22305]	7	35079989	35186041	-1
ENSG00000130055	-1.48051	0.358363	-0.132397	-6.34032	2.58e-06	7.13e-06	4.56009	54857	GDPD2	glycerophosphodiester phosphodiesterase domain containing 2 [Source:HGNC Symbol;Acc:HGNC:25974]	X	70423031	70433390	1
ENSG00000216819	-1.47914	0.358702	0.178831	-7.47799	2.18e-07	7.3e-07	6.9962		TUBB2BP1	tubulin beta 2B class IIb pseudogene 1 [Source:HGNC Symbol;Acc:HGNC:42332]	6	3177044	3179764	-1
ENSG00000185155	-1.47806	0.358972	-0.00150404	-7.62067	1.62e-07	5.53e-07	7.32622	83881	MIXL1	Mix paired-like homeobox [Source:HGNC Symbol;Acc:HGNC:13363]	1	226223618	226227054	1
ENSG00000153933	-1.47718	0.35919	4.0242	-20.8032	1.24e-15	2.59e-14	25.6933	8526	DGKE	diacylglycerol kinase epsilon [Source:HGNC Symbol;Acc:HGNC:2852]	17	56834099	56869567	1
ENSG00000116525	-1.47438	0.359887	2.61624	-14.3447	2.03e-12	1.92e-11	18.3568	55223	TRIM62	tripartite motif containing 62 [Source:HGNC Symbol;Acc:HGNC:25574]	1	33145402	33182059	-1
ENSG00000231198	-1.47308	0.360212	0.994272	-10.4417	7.78e-10	4.14e-09	12.5766		AC004987.10		7	39833286	39833793	-1
ENSG00000057657	-1.4703	0.360908	-0.0381227	-6.63411	1.34e-06	3.9e-06	5.20108	639	PRDM1	PR/SET domain 1 [Source:HGNC Symbol;Acc:HGNC:9346]	6	106086320	106109939	1
ENSG00000119866	-1.46834	0.361398	1.04929	-8.47744	2.88e-08	1.12e-07	8.89057	53335	BCL11A	B-cell CLL/lymphoma 11A [Source:HGNC Symbol;Acc:HGNC:13221]	2	60451167	60553567	-1
ENSG00000155846	-1.46808	0.361462	2.05446	-11.022	2.92e-10	1.69e-09	13.3737	133522	PPARGC1B	PPARG coactivator 1 beta [Source:HGNC Symbol;Acc:HGNC:30022]	5	149730298	149855022	1
ENSG00000176170	-1.46709	0.361712	4.66659	-20.125	2.43e-15	4.68e-14	24.8729	8877	SPHK1	sphingosine kinase 1 [Source:HGNC Symbol;Acc:HGNC:11240]	17	76376584	76387860	1
ENSG00000118985	-1.46172	0.36306	3.37648	-11.8647	7.51e-11	4.98e-10	14.4615	22936	ELL2	elongation factor for RNA polymerase II 2 [Source:HGNC Symbol;Acc:HGNC:17064]	5	95885098	95962071	-1
ENSG00000138795	-1.45708	0.364229	6.28724	-32.6861	1.09e-19	7.72e-18	34.9874	51176	LEF1	lymphoid enhancer binding factor 1 [Source:HGNC Symbol;Acc:HGNC:6551]	4	108047545	108168956	-1
ENSG00000223865	-1.45653	0.364369	2.04852	-13.6768	5.09e-12	4.4e-11	17.5216	3115	HLA-DPB1	major histocompatibility complex, class II, DP beta 1 [Source:HGNC Symbol;Acc:HGNC:4940]	6	33075926	33087201	1
ENSG00000197712	-1.45638	0.364406	3.39808	-20.1216	2.44e-15	4.69e-14	25.1115	92689	FAM114A1	family with sequence similarity 114 member A1 [Source:HGNC Symbol;Acc:HGNC:25087]	4	38867677	38945739	1
ENSG00000099954	-1.45638	0.364407	5.48652	-29.0055	1.32e-18	6.79e-17	32.5075	27443	CECR2	CECR2, histone acetyl-lysine reader [Source:HGNC Symbol;Acc:HGNC:1840]	22	17359949	17558149	1
ENSG00000162729	-1.45265	0.36535	4.81605	-21.0964	9.31e-16	2.05e-14	25.8352	93185	IGSF8	immunoglobulin superfamily member 8 [Source:HGNC Symbol;Acc:HGNC:17813]	1	160091340	160098943	-1
ENSG00000167123	-1.45215	0.365477	3.76032	-16.5347	1.25e-13	1.59e-12	20.9826	51148	CERCAM	cerebral endothelial cell adhesion molecule [Source:HGNC Symbol;Acc:HGNC:23723]	9	128411751	128437351	1
ENSG00000072110	-1.45062	0.365864	6.84059	-23.9435	6.98e-17	2.11e-15	28.2445	87	ACTN1	actinin alpha 1 [Source:HGNC Symbol;Acc:HGNC:163]	14	68874143	68979440	-1
ENSG00000183935	-1.45011	0.365993	0.764237	-8.21921	4.8e-08	1.8e-07	8.42566	93164	HTR7P1	5-hydroxytryptamine receptor 7 pseudogene 1 [Source:HGNC Symbol;Acc:HGNC:30411]	12	13000420	13004830	1
ENSG00000141540	-1.44981	0.36607	3.19596	-16.5085	1.29e-13	1.63e-12	21.0688	94015	TTYH2	tweety family member 2 [Source:HGNC Symbol;Acc:HGNC:13877]	17	74213514	74262020	1
ENSG00000169169	-1.4491	0.366251	3.89117	-13.159	1.07e-11	8.54e-11	16.3548	126129	CPT1C	carnitine palmitoyltransferase 1C [Source:HGNC Symbol;Acc:HGNC:18540]	19	49690898	49713731	1
ENSG00000102879	-1.44744	0.36667	3.36525	-16.5783	1.19e-13	1.51e-12	21.1203	11151	CORO1A	coronin 1A [Source:HGNC Symbol;Acc:HGNC:2252]	16	30182827	30189076	1
ENSG00000082397	-1.44717	0.366741	4.72457	-27.7127	3.4e-18	1.52e-16	31.6433	23136	EPB41L3	erythrocyte membrane protein band 4.1 like 3 [Source:HGNC Symbol;Acc:HGNC:3380]	18	5392381	5630700	-1
ENSG00000163040	-1.44441	0.367443	2.59979	-12.4132	3.22e-11	2.32e-10	15.5172	90557	CCDC74A	coiled-coil domain containing 74A [Source:HGNC Symbol;Acc:HGNC:25197]	2	131527675	131533666	1
ENSG00000112759	-1.44188	0.368088	5.03895	-22.79	1.92e-16	5.15e-15	27.4271	2030	SLC29A1	solute carrier family 29 member 1 (Augustine blood group) [Source:HGNC Symbol;Acc:HGNC:11003]	6	44219505	44234151	1
ENSG00000143772	-1.44094	0.368327	3.70552	-20.7726	1.28e-15	2.66e-14	25.7201	3707	ITPKB	inositol-trisphosphate 3-kinase B [Source:HGNC Symbol;Acc:HGNC:6179]	1	226631690	226739323	-1
ENSG00000169604	-1.44055	0.368427	5.19089	-31.9492	1.76e-19	1.18e-17	34.6216	84168	ANTXR1	anthrax toxin receptor 1 [Source:HGNC Symbol;Acc:HGNC:21014]	2	69013178	69249327	1
ENSG00000283676	-1.43814	0.369043	0.691387	-7.35263	2.84e-07	9.3e-07	6.63114	100847044	MIR5087	microRNA 5087 [Source:HGNC Symbol;Acc:HGNC:43480]	1	148334479	148334554	-1
ENSG00000138166	-1.43353	0.370224	2.93715	-16.0312	2.31e-13	2.72e-12	20.5237	1847	DUSP5	dual specificity phosphatase 5 [Source:HGNC Symbol;Acc:HGNC:3071]	10	110497838	110511544	1
ENSG00000107105	-1.42841	0.371541	4.5756	-18.5387	1.27e-14	2.05e-13	23.1716	1993	ELAVL2	ELAV like neuron-specific RNA binding protein 2 [Source:HGNC Symbol;Acc:HGNC:3313]	9	23690104	23826337	-1
ENSG00000129355	-1.42702	0.371898	2.1738	-12.1585	4.75e-11	3.32e-10	15.2083	1032	CDKN2D	cyclin dependent kinase inhibitor 2D [Source:HGNC Symbol;Acc:HGNC:1790]	19	10566462	10569059	-1
ENSG00000196159	-1.42606	0.372145	2.72524	-15.804	3.06e-13	3.49e-12	20.2756	79633	FAT4	FAT atypical cadherin 4 [Source:HGNC Symbol;Acc:HGNC:23109]	4	125316399	125492932	1
ENSG00000260807	-1.42353	0.372799	2.76897	-11.6523	1.05e-10	6.71e-10	14.2599	64788	RP11-161M6.2		16	975761	981596	-1
ENSG00000120675	-1.42126	0.373387	0.266534	-6.1773	3.73e-06	1e-05	4.11089	29103	DNAJC15	DnaJ heat shock protein family (Hsp40) member C15 [Source:HGNC Symbol;Acc:HGNC:20325]	13	43023203	43114224	1
ENSG00000092096	-1.41918	0.373924	4.30151	-21.007	1.02e-15	2.2e-14	25.8418	51310	SLC22A17	solute carrier family 22 member 17 [Source:HGNC Symbol;Acc:HGNC:23095]	14	23346306	23352912	-1
ENSG00000239218	-1.41805	0.374218	0.0963285	-6.61451	1.4e-06	4.05e-06	5.13046		RPS20P22	ribosomal protein S20 pseudogene 22 [Source:HGNC Symbol;Acc:HGNC:36379]	8	38434347	38435664	-1
ENSG00000103460	-1.41702	0.374484	0.996337	-8.67273	1.97e-08	7.94e-08	9.28618	27324	TOX3	TOX high mobility group box family member 3 [Source:HGNC Symbol;Acc:HGNC:11972]	16	52438005	52547802	-1
ENSG00000061656	-1.41698	0.374496	1.01554	-9.83894	2.24e-09	1.09e-08	11.4945	6676	SPAG4	sperm associated antigen 4 [Source:HGNC Symbol;Acc:HGNC:11214]	20	35615892	35621049	1
ENSG00000174607	-1.41652	0.374614	7.45502	-29.5467	8.99e-19	4.9e-17	32.7195	7368	UGT8	UDP glycosyltransferase 8 [Source:HGNC Symbol;Acc:HGNC:12555]	4	114598455	114678224	1
ENSG00000134909	-1.41636	0.374656	5.46114	-25.3646	2.13e-17	7.73e-16	29.6358	9743	ARHGAP32	Rho GTPase activating protein 32 [Source:HGNC Symbol;Acc:HGNC:17399]	11	128965060	129279324	-1
ENSG00000072133	-1.41622	0.374692	2.81141	-13.1918	1.02e-11	8.17e-11	16.6532	27330	RPS6KA6	ribosomal protein S6 kinase A6 [Source:HGNC Symbol;Acc:HGNC:10435]	X	84058346	84187907	-1
ENSG00000201558	-1.41546	0.37489	2.30492	-11.2887	1.88e-10	1.14e-09	13.7654	101954276	RNVU1-6	RNA, variant U1 small nuclear 6 [Source:HGNC Symbol;Acc:HGNC:48314]	1	146052081	146052244	-1
ENSG00000165349	-1.41388	0.375302	3.08211	-14.3934	1.9e-12	1.81e-11	18.3212	84889	SLC7A3	solute carrier family 7 member 3 [Source:HGNC Symbol;Acc:HGNC:11061]	X	70925582	70931125	-1
ENSG00000179299	-1.41217	0.375747	1.86805	-11.9958	6.12e-11	4.16e-10	15.0105	79730	NSUN7	NOP2/Sun RNA methyltransferase family member 7 [Source:HGNC Symbol;Acc:HGNC:25857]	4	40749897	40809985	1
ENSG00000183049	-1.41091	0.376074	2.94866	-16.267	1.73e-13	2.09e-12	20.8167	57118	CAMK1D	calcium/calmodulin dependent protein kinase ID [Source:HGNC Symbol;Acc:HGNC:19341]	10	12349482	12835545	1
ENSG00000283151	-1.4086	0.376677	3.92411	-20.2049	2.24e-15	4.35e-14	25.0977	51310	AL049829.1	solute carrier family 22 member 17 isoform c [Source:RefSeq peptide;Acc:NP_001275979]	14	23346648	23352214	-1
ENSG00000142733	-1.40817	0.376789	3.95019	-16.2952	1.67e-13	2.03e-12	20.6393	9064	MAP3K6	mitogen-activated protein kinase kinase kinase 6 [Source:HGNC Symbol;Acc:HGNC:6858]	1	27355184	27366892	-1
ENSG00000257038	-1.40813	0.376801	0.474012	-6.56446	1.57e-06	4.49e-06	4.94477		RP11-800A3.7		11	73307235	73309361	-1
ENSG00000164620	-1.40724	0.377032	2.56072	-14.6917	1.28e-12	1.26e-11	18.8402	285613	RELL2	RELT like 2 [Source:HGNC Symbol;Acc:HGNC:26902]	5	141636950	141641077	1
ENSG00000170629	-1.40721	0.37704	2.4071	-12.5262	2.72e-11	1.98e-10	15.7322	349152	DPY19L2P2	DPY19L2 pseudogene 2 [Source:HGNC Symbol;Acc:HGNC:21764]	7	103175133	103280410	-1
ENSG00000158301	-1.40649	0.377227	4.36379	-25.1037	2.63e-17	9.36e-16	29.5947	114928 100528062	GPRASP2	G protein-coupled receptor associated sorting protein 2 [Source:HGNC Symbol;Acc:HGNC:25169]	X	102712176	102717733	1
ENSG00000203943	-1.40603	0.377349	0.265707	-8.44805	3.05e-08	1.18e-07	8.97044	148418	SAMD13	sterile alpha motif domain containing 13 [Source:HGNC Symbol;Acc:HGNC:24582]	1	84298366	84389957	1
ENSG00000172986	-1.40574	0.377426	3.2774	-14.5381	1.57e-12	1.52e-11	18.4768	727936	GXYLT2	glucoside xylosyltransferase 2 [Source:HGNC Symbol;Acc:HGNC:33383]	3	72888073	72998138	1
ENSG00000198832	-1.40548	0.377493	1.99771	-10.1455	1.3e-09	6.64e-09	11.8499	140606	SELM	selenoprotein M [Source:EntrezGene;Acc:140606]	22	31104772	31120069	-1
ENSG00000227398	-1.40529	0.377542	1.67792	-9.88905	2.05e-09	1e-08	11.4549		KIF9-AS1	KIF9 antisense RNA 1 [Source:HGNC Symbol;Acc:HGNC:26822]	3	47164497	47246601	1
ENSG00000155849	-1.405	0.377617	2.37503	-12.2315	4.25e-11	2.98e-10	15.2792	9844	ELMO1	engulfment and cell motility 1 [Source:HGNC Symbol;Acc:HGNC:16286]	7	36854361	37449249	-1
ENSG00000229891	-1.40343	0.378028	1.27645	-10.2311	1.12e-09	5.79e-09	12.1525	102723775	LINC01315	long intergenic non-protein coding RNA 1315 [Source:HGNC Symbol;Acc:HGNC:50513]	22	42364400	42369236	-1
ENSG00000172346	-1.40241	0.378298	1.98307	-10.7815	4.36e-10	2.45e-09	12.9733	27254	CSDC2	cold shock domain containing C2 [Source:HGNC Symbol;Acc:HGNC:30359]	22	41560763	41577741	1
ENSG00000181856	-1.40174	0.378472	0.372173	-6.83908	8.56e-07	2.58e-06	5.57495	6517	SLC2A4	solute carrier family 2 member 4 [Source:HGNC Symbol;Acc:HGNC:11009]	17	7281667	7288257	1
ENSG00000187608	-1.40158	0.378514	-0.25824	-6.33301	2.62e-06	7.24e-06	4.56183	9636	ISG15	ISG15 ubiquitin-like modifier [Source:HGNC Symbol;Acc:HGNC:4053]	1	1001138	1014541	1
ENSG00000278610	-1.40067	0.378753	1.45819	-9.72371	2.76e-09	1.31e-08	11.1969		RP11-455P21.3		1	222815064	222994906	1
ENSG00000104313	-1.39889	0.379221	3.02201	-12.2462	4.15e-11	2.92e-10	15.1529	2138	EYA1	EYA transcriptional coactivator and phosphatase 1 [Source:HGNC Symbol;Acc:HGNC:3519]	8	71197433	71362232	-1
ENSG00000138835	-1.39661	0.37982	5.07943	-19.3989	5.11e-15	9.09e-14	24.0191	5998	RGS3	regulator of G-protein signaling 3 [Source:HGNC Symbol;Acc:HGNC:9999]	9	113444731	113597743	1
ENSG00000267598	-1.3957	0.380059	3.68694	-13.3468	8.14e-12	6.69e-11	16.6801		CTC-250I14.6		19	13153071	13154193	-1
ENSG00000205476	-1.39564	0.380075	5.10382	-20.3832	1.87e-15	3.76e-14	25.0537	317762	CCDC85C	coiled-coil domain containing 85C [Source:HGNC Symbol;Acc:HGNC:35459]	14	99500180	99604026	-1
ENSG00000248235	-1.39502	0.38024	3.49937	-12.7898	1.83e-11	1.39e-10	15.8854		AC037459.4		8	22589274	22602084	1
ENSG00000279821	-1.39292	0.380794	0.436235	-8.14446	5.57e-08	2.06e-07	8.33067		RP11-1334A24.5		5	177476631	177479656	-1
ENSG00000132622	-1.39211	0.381007	0.338852	-7.26995	3.39e-07	1.09e-06	6.51966	116835	HSPA12B	heat shock protein family A (Hsp70) member 12B [Source:HGNC Symbol;Acc:HGNC:16193]	20	3732667	3753111	1
ENSG00000205978	-1.39099	0.381303	3.86209	-16.076	2.18e-13	2.59e-12	20.381	57523	NYNRIN	NYN domain and retroviral integrase containing [Source:HGNC Symbol;Acc:HGNC:20165]	14	24398786	24419288	1
ENSG00000272801	-1.39061	0.381403	2.46728	-11.7843	8.52e-11	5.57e-10	14.5438		RP1-170O19.23		7	27147366	27152598	-1
ENSG00000245694	-1.39022	0.381507	3.98957	-20.3888	1.86e-15	3.75e-14	25.2733	101927480	CRNDE	colorectal neoplasia differentially expressed (non-protein coding) [Source:HGNC Symbol;Acc:HGNC:37078]	16	54845189	54929189	-1
ENSG00000145428	-1.38969	0.381647	2.56103	-13.0942	1.17e-11	9.32e-11	16.5618	285533	RNF175	ring finger protein 175 [Source:HGNC Symbol;Acc:HGNC:27735]	4	153710125	153760235	-1
ENSG00000160753	-1.38727	0.382287	3.5684	-17.4614	4.23e-14	5.96e-13	22.1383	23623	RUSC1	RUN and SH3 domain containing 1 [Source:HGNC Symbol;Acc:HGNC:17153]	1	155320896	155331114	1
ENSG00000169862	-1.38438	0.383055	2.13589	-8.55114	2.49e-08	9.87e-08	8.78696	1501	CTNND2	catenin delta 2 [Source:HGNC Symbol;Acc:HGNC:2516]	5	10971840	11904043	-1
ENSG00000150977	-1.38324	0.383357	2.74691	-15.7965	3.09e-13	3.52e-12	20.2593	196383	RILPL2	Rab interacting lysosomal protein like 2 [Source:HGNC Symbol;Acc:HGNC:28787]	12	123410683	123436717	-1
ENSG00000175182	-1.37921	0.384428	2.1898	-12.7675	1.89e-11	1.44e-10	16.1466	131408	FAM131A	family with sequence similarity 131 member A [Source:HGNC Symbol;Acc:HGNC:28308]	3	184335926	184346275	1
ENSG00000160200	-1.37779	0.384806	1.46704	-10.0306	1.59e-09	8.01e-09	11.7539	875 102724560	CBS	cystathionine-beta-synthase [Source:HGNC Symbol;Acc:HGNC:1550]	21	43053191	43076943	-1
ENSG00000144283	-1.37696	0.38503	6.00743	-28.7161	1.63e-18	8.1e-17	32.223	8502	PKP4	plakophilin 4 [Source:HGNC Symbol;Acc:HGNC:9026]	2	158456964	158682879	1
ENSG00000254369	-1.37621	0.38523	5.15941	-20.829	1.21e-15	2.54e-14	25.4988	100133311	HOXA-AS3	HOXA cluster antisense RNA 3 [Source:HGNC Symbol;Acc:HGNC:43748]	7	27129977	27155928	1
ENSG00000110237	-1.37399	0.385822	5.00693	-21.5616	5.97e-16	1.38e-14	26.2556	9828	ARHGEF17	Rho guanine nucleotide exchange factor 17 [Source:HGNC Symbol;Acc:HGNC:21726]	11	73308289	73369091	1
ENSG00000167100	-1.37361	0.385925	3.55794	-14.4735	1.71e-12	1.65e-11	18.3226	201191	SAMD14	sterile alpha motif domain containing 14 [Source:HGNC Symbol;Acc:HGNC:27312]	17	50110040	50129882	-1
ENSG00000131697	-1.37268	0.386174	3.61523	-17.3123	5.02e-14	6.91e-13	21.9515	261734	NPHP4	nephrocystin 4 [Source:HGNC Symbol;Acc:HGNC:19104]	1	5862811	5992473	-1
ENSG00000168394	-1.37182	0.386405	0.326198	-6.13469	4.1e-06	1.1e-05	3.99944	6890	TAP1	transporter 1, ATP binding cassette subfamily B member [Source:HGNC Symbol;Acc:HGNC:43]	6	32845209	32853978	-1
ENSG00000214121	-1.37136	0.386527	4.19826	-21.1395	8.93e-16	1.98e-14	25.9906		PRDX1P1	peroxiredoxin 1 pseudogene 1 [Source:HGNC Symbol;Acc:HGNC:11711]	9	12972843	12973438	-1
ENSG00000258611	-1.37107	0.386605	-0.0102829	-6.19934	3.54e-06	9.57e-06	4.21287		RP11-368J22.2		15	93065586	93066606	-1
ENSG00000174136	-1.37085	0.386664	5.96447	-23.7686	8.11e-17	2.39e-15	28.1764	285704	RGMB	repulsive guidance molecule family member b [Source:HGNC Symbol;Acc:HGNC:26896]	5	98768650	98798643	1
ENSG00000214226	-1.37042	0.386777	1.24339	-8.01702	7.2e-08	2.61e-07	7.90898	339210	C17orf67	chromosome 17 open reading frame 67 [Source:HGNC Symbol;Acc:HGNC:27900]	17	56791913	56838773	-1
ENSG00000261324	-1.36563	0.388064	1.60982	-10.002	1.68e-09	8.38e-09	11.6728		RP11-174G6.5		12	14762504	14767931	-1
ENSG00000100979	-1.36425	0.388437	6.02945	-30.7806	3.83e-19	2.35e-17	33.7147	5360	PLTP	phospholipid transfer protein [Source:HGNC Symbol;Acc:HGNC:9093]	20	45898621	45912155	-1
ENSG00000204380	-1.3627	0.388854	1.81284	-10.2246	1.13e-09	5.85e-09	12.0299	100129029	AC005042.4		2	158658337	158735002	-1
ENSG00000129295	-1.3621	0.389016	1.22303	-7.85131	1.01e-07	3.57e-07	7.56907	23639	LRRC6	leucine rich repeat containing 6 [Source:HGNC Symbol;Acc:HGNC:16725]	8	132571953	132675617	-1
ENSG00000185532	-1.36154	0.389167	3.96909	-21.2203	8.27e-16	1.84e-14	26.1135	5592	PRKG1	protein kinase, cGMP-dependent, type I [Source:HGNC Symbol;Acc:HGNC:9414]	10	50991358	52298350	1
ENSG00000144369	-1.35927	0.389779	5.22255	-24.9716	2.94e-17	1.02e-15	29.3363	165215	FAM171B	family with sequence similarity 171 member B [Source:HGNC Symbol;Acc:HGNC:29412]	2	186693971	186765965	1
ENSG00000151612	-1.35795	0.390135	3.8153	-18.5411	1.27e-14	2.04e-13	23.3261	152485	ZNF827	zinc finger protein 827 [Source:HGNC Symbol;Acc:HGNC:27193]	4	145757627	145938635	-1
ENSG00000141505	-1.35754	0.390247	0.876836	-7.07024	5.19e-07	1.63e-06	5.97744	432	ASGR1	asialoglycoprotein receptor 1 [Source:HGNC Symbol;Acc:HGNC:742]	17	7173431	7179564	-1
ENSG00000128965	-1.35752	0.390253	1.75141	-10.5848	6.09e-10	3.31e-09	12.6789	79094	CHAC1	ChaC glutathione specific gamma-glutamylcyclotransferase 1 [Source:HGNC Symbol;Acc:HGNC:28680]	15	40952962	40956519	1
ENSG00000152495	-1.35737	0.390293	3.28408	-16.9841	7.35e-14	9.74e-13	21.6255	814	CAMK4	calcium/calmodulin dependent protein kinase IV [Source:HGNC Symbol;Acc:HGNC:1464]	5	111223653	111494886	1
ENSG00000204815	-1.35695	0.390407	1.20972	-9.48456	4.26e-09	1.96e-08	10.8012	83538	TTC25	tetratricopeptide repeat domain 25 [Source:HGNC Symbol;Acc:HGNC:25280]	17	41930635	41965651	1
ENSG00000234899	-1.35628	0.390587	0.541047	-8.44194	3.08e-08	1.2e-07	8.91015	400618 102723517	SOX9-AS1	SOX9 antisense RNA 1 [Source:HGNC Symbol;Acc:HGNC:49321]	17	72034107	72237203	-1
ENSG00000106536	-1.35595	0.390678	1.67524	-8.30485	4.04e-08	1.54e-07	8.3992	11281	POU6F2	POU class 6 homeobox 2 [Source:HGNC Symbol;Acc:HGNC:21694]	7	38977998	39493095	1
ENSG00000267705	-1.35479	0.390991	0.776499	-7.80839	1.1e-07	3.87e-07	7.57318		RP11-108P20.3		18	58752179	58753898	-1
ENSG00000176387	-1.35442	0.391093	0.479836	-6.46923	1.93e-06	5.45e-06	4.72726	3291	HSD11B2	hydroxysteroid 11-beta dehydrogenase 2 [Source:HGNC Symbol;Acc:HGNC:5209]	16	67430652	67437553	1
ENSG00000146416	-1.35404	0.391194	4.052	-15.7873	3.12e-13	3.55e-12	19.9668	51390	AIG1	androgen induced 1 [Source:HGNC Symbol;Acc:HGNC:21607]	6	143060496	143340304	1
ENSG00000233101	-1.35345	0.391356	5.71218	-27.6075	3.68e-18	1.62e-16	31.4122	404266	HOXB-AS3	HOXB cluster antisense RNA 3 [Source:HGNC Symbol;Acc:HGNC:40283]	17	48549630	48606414	1
ENSG00000269609	-1.3517	0.39183	1.86486	-10.0403	1.57e-09	7.9e-09	11.6866	100505761	RPARP-AS1	RPARP antisense RNA 1 [Source:HGNC Symbol;Acc:HGNC:45238]	10	102449817	102461106	1
ENSG00000181826	-1.35083	0.392067	4.75208	-18.1845	1.88e-14	2.9e-13	22.7297	768211	RELL1	RELT like 1 [Source:HGNC Symbol;Acc:HGNC:27379]	4	37590800	37686376	-1
ENSG00000104361	-1.34979	0.392348	0.677396	-6.92517	7.1e-07	2.17e-06	5.70117	79815	NIPAL2	NIPA like domain containing 2 [Source:HGNC Symbol;Acc:HGNC:25854]	8	98189833	98294393	-1
ENSG00000244161	-1.34971	0.392371	3.24087	-15.1334	7.16e-13	7.45e-12	19.2886	105377105	FLNB-AS1	FLNB antisense RNA 1 [Source:HGNC Symbol;Acc:HGNC:40239]	3	58162547	58170636	-1
ENSG00000106012	-1.34828	0.39276	4.05071	-18.4428	1.41e-14	2.24e-13	23.1669	23288	IQCE	IQ motif containing E [Source:HGNC Symbol;Acc:HGNC:29171]	7	2558972	2614734	1
ENSG00000067715	-1.3474	0.392998	3.05925	-15.3206	5.63e-13	6e-12	19.5759	6857	SYT1	synaptotagmin 1 [Source:HGNC Symbol;Acc:HGNC:11509]	12	78863993	79452008	1
ENSG00000185250	-1.34726	0.393038	0.123754	-6.51379	1.75e-06	4.98e-06	4.89704	285755	PPIL6	peptidylprolyl isomerase like 6 [Source:HGNC Symbol;Acc:HGNC:21557]	6	109390215	109441171	-1
ENSG00000269068	-1.34625	0.393312	0.576076	-7.07651	5.12e-07	1.6e-06	6.05318		RP11-256I23.2		2	219559083	219559626	1
ENSG00000167604	-1.34575	0.39345	1.01882	-9.07999	9.03e-09	3.89e-08	10.0704	84807	NFKBID	NFKB inhibitor delta [Source:HGNC Symbol;Acc:HGNC:15671]	19	35887653	35902303	-1
ENSG00000108830	-1.34565	0.393477	4.43085	-17.4876	4.1e-14	5.8e-13	21.9848	8153	RND2	Rho family GTPase 2 [Source:HGNC Symbol;Acc:HGNC:18315]	17	43025241	43032036	1
ENSG00000167771	-1.34554	0.393507	5.62406	-21.4613	6.57e-16	1.5e-14	26.0524	283248	RCOR2	REST corepressor 2 [Source:HGNC Symbol;Acc:HGNC:27455]	11	63911221	63916844	-1
ENSG00000179981	-1.34502	0.393647	3.58578	-19.1162	6.87e-15	1.18e-13	24.0052	10194	TSHZ1	teashirt zinc finger homeobox 1 [Source:HGNC Symbol;Acc:HGNC:10669]	18	75210755	75289950	1
ENSG00000088340	-1.34499	0.393657	0.383388	-6.32058	2.7e-06	7.43e-06	4.40995		FER1L4	fer-1 like family member 4, pseudogene [Source:HGNC Symbol;Acc:HGNC:15801]	20	35558737	35607562	-1
ENSG00000117450	-1.34429	0.393849	8.11303	-28.8623	1.46e-18	7.45e-17	32.1801	5052	PRDX1	peroxiredoxin 1 [Source:HGNC Symbol;Acc:HGNC:9352]	1	45511036	45523047	-1
ENSG00000122592	-1.34367	0.394018	4.32335	-15.387	5.17e-13	5.58e-12	19.383	3204	HOXA7	homeobox A7 [Source:HGNC Symbol;Acc:HGNC:5108]	7	27153716	27157936	-1
ENSG00000279232	-1.34285	0.39424	5.33406	-20.0711	2.56e-15	4.89e-14	24.6857		AC008522.1		5	98792863	98795766	-1
ENSG00000158062	-1.34174	0.394546	4.88855	-21.9777	4.04e-16	9.9e-15	26.6791	91544	UBXN11	UBX domain protein 11 [Source:HGNC Symbol;Acc:HGNC:30600]	1	26281328	26318363	-1
ENSG00000138744	-1.34131	0.394662	1.15362	-9.85424	2.18e-09	1.06e-08	11.4931	27163	NAAA	N-acylethanolamine acid amidase [Source:HGNC Symbol;Acc:HGNC:736]	4	75913657	75941051	-1
ENSG00000247925	-1.33939	0.395187	0.406394	-7.7926	1.14e-07	3.99e-07	7.60967		RP3-510L9.1		6	11173452	11259099	1
ENSG00000254087	-1.33822	0.395508	3.95095	-18.449	1.4e-14	2.22e-13	23.1939	4067	LYN	LYN proto-oncogene, Src family tyrosine kinase [Source:HGNC Symbol;Acc:HGNC:6735]	8	55879813	56014168	1
ENSG00000081803	-1.33716	0.395798	1.96913	-9.93715	1.88e-09	9.28e-09	11.4744	93664	CADPS2	calcium dependent secretion activator 2 [Source:HGNC Symbol;Acc:HGNC:16018]	7	122318425	122886759	-1
ENSG00000241472	-1.333	0.396943	4.17111	-23.4699	1.05e-16	3.02e-15	28.198	100506994	PTPRG-AS1	PTPRG antisense RNA 1 [Source:HGNC Symbol;Acc:HGNC:44638]	3	62260865	62369330	-1
ENSG00000084453	-1.3328	0.396998	2.7464	-9.77875	2.5e-09	1.2e-08	10.9948	6579	SLCO1A2	solute carrier organic anion transporter family member 1A2 [Source:HGNC Symbol;Acc:HGNC:10956]	12	21264600	21419594	-1
ENSG00000069424	-1.33272	0.397019	0.414255	-6.31266	2.75e-06	7.56e-06	4.38536	8514	KCNAB2	potassium voltage-gated channel subfamily A regulatory beta subunit 2 [Source:HGNC Symbol;Acc:HGNC:6229]	1	5991466	6101193	1
ENSG00000013619	-1.33234	0.397123	0.492916	-6.71891	1.11e-06	3.28e-06	5.28164	10046	MAMLD1	mastermind like domain containing 1 [Source:HGNC Symbol;Acc:HGNC:2568]	X	150361422	150514178	1
ENSG00000100299	-1.33166	0.397312	2.45018	-12.1587	4.75e-11	3.32e-10	15.1438	410	ARSA	arylsulfatase A [Source:HGNC Symbol;Acc:HGNC:713]	22	50622754	50628173	-1
ENSG00000082014	-1.33105	0.397478	4.43821	-22.2156	3.24e-16	8.15e-15	26.9895	6604	SMARCD3	SWI/SNF related, matrix associated, actin dependent regulator of chromatin, subfamily d, member 3 [Source:HGNC Symbol;Acc:HGNC:11108]	7	151238764	151277896	-1
ENSG00000225792	-1.32966	0.397862	2.60623	-11.1132	2.51e-10	1.48e-09	13.3934		AC004540.4		7	26372144	26376701	-1
ENSG00000236404	-1.32875	0.398113	2.47973	-12.5364	2.67e-11	1.95e-10	15.7276	401491	VLDLR-AS1	VLDLR antisense RNA 1 [Source:HGNC Symbol;Acc:HGNC:49621]	9	2422702	2643359	-1
ENSG00000256185	-1.32796	0.398332	1.06197	-8.57077	2.4e-08	9.53e-08	9.06595		RP11-612B6.2		12	26335864	26336950	-1
ENSG00000147852	-1.32674	0.398669	4.7596	-25.633	1.71e-17	6.31e-16	29.9679	7436	VLDLR	very low density lipoprotein receptor [Source:HGNC Symbol;Acc:HGNC:12698]	9	2621834	2660053	1
ENSG00000197496	-1.32561	0.398981	2.66336	-12.7431	1.96e-11	1.48e-10	16.0045	81031	SLC2A10	solute carrier family 2 member 10 [Source:HGNC Symbol;Acc:HGNC:13444]	20	46709487	46736347	1
ENSG00000241316	-1.32514	0.399109	0.533717	-6.79876	9.35e-07	2.8e-06	5.44967	101927111	SUCLG2-AS1	SUCLG2 antisense RNA 1 (head to head) [Source:HGNC Symbol;Acc:HGNC:49643]	3	67654697	67947713	1
ENSG00000172175	-1.3248	0.399204	5.78618	-32.7232	1.07e-19	7.59e-18	35.0586	10892	MALT1	MALT1 paracaspase [Source:HGNC Symbol;Acc:HGNC:6819]	18	58671386	58754477	1
ENSG00000149782	-1.324	0.399426	5.42263	-28.4543	1.97e-18	9.55e-17	32.0983	5331	PLCB3	phospholipase C beta 3 [Source:HGNC Symbol;Acc:HGNC:9056]	11	64251523	64269150	1
ENSG00000125744	-1.32347	0.399573	2.3131	-13.2647	9.15e-12	7.43e-11	16.8637	6253	RTN2	reticulon 2 [Source:HGNC Symbol;Acc:HGNC:10468]	19	45485289	45497061	-1
ENSG00000273433	-1.32163	0.400084	2.28761	-11.5669	1.2e-10	7.6e-10	14.2248		RP1-170O19.22		7	27128969	27152561	-1
ENSG00000139182	-1.32097	0.400266	3.93396	-16.3274	1.61e-13	1.98e-12	20.6773	9746	CLSTN3	calsyntenin 3 [Source:HGNC Symbol;Acc:HGNC:18371]	12	7129698	7158945	1
ENSG00000092964	-1.32045	0.400409	7.75278	-36.2689	1.24e-20	1.23e-18	37.1399	1808	DPYSL2	dihydropyrimidinase like 2 [Source:HGNC Symbol;Acc:HGNC:3014]	8	26514022	26658178	1
ENSG00000168243	-1.32025	0.400466	3.15088	-13.7979	4.3e-12	3.78e-11	17.4571	2786	GNG4	G protein subunit gamma 4 [Source:HGNC Symbol;Acc:HGNC:4407]	1	235547687	235650754	-1
ENSG00000153531	-1.31789	0.401122	0.217237	-5.74833	9.94e-06	2.5e-05	3.12714	113622	ADPRHL1	ADP-ribosylhydrolase like 1 [Source:HGNC Symbol;Acc:HGNC:21303]	13	113399610	113453524	-1
ENSG00000030419	-1.31633	0.401556	3.33302	-9.81388	2.34e-09	1.13e-08	10.9082	22807	IKZF2	IKAROS family zinc finger 2 [Source:HGNC Symbol;Acc:HGNC:13177]	2	212999691	213152427	-1
ENSG00000266709	-1.31521	0.401868	2.33712	-11.0121	2.97e-10	1.72e-09	13.284		RP11-214O1.2		17	14303854	14305505	1
ENSG00000088367	-1.3151	0.401897	3.58476	-16.5743	1.19e-13	1.52e-12	21.0602	2036	EPB41L1	erythrocyte membrane protein band 4.1 like 1 [Source:HGNC Symbol;Acc:HGNC:3378]	20	36091504	36232799	1
ENSG00000278099	-1.3146	0.402037	0.81094	-6.57238	1.54e-06	4.42e-06	4.88553		U1	U1 spliceosomal RNA [Source:RFAM;Acc:RF00003]	1	144551779	144551943	-1
ENSG00000154479	-1.31448	0.402069	0.0379117	-4.82142	8.83e-05	0.00019108	0.975468	129881	CCDC173	coiled-coil domain containing 173 [Source:HGNC Symbol;Acc:HGNC:25064]	2	169645425	169694433	-1
ENSG00000149489	-1.31429	0.402124	0.714297	-8.24806	4.53e-08	1.7e-07	8.48653	6094	ROM1	retinal outer segment membrane protein 1 [Source:HGNC Symbol;Acc:HGNC:10254]	11	62611722	62615120	1
ENSG00000109586	-1.31409	0.402178	5.32666	-24.5681	4.11e-17	1.35e-15	28.97	51809	GALNT7	polypeptide N-acetylgalactosaminyltransferase 7 [Source:HGNC Symbol;Acc:HGNC:4129]	4	173168753	173323967	1
ENSG00000106772	-1.31381	0.402256	2.91287	-11.1416	2.4e-10	1.42e-09	13.3662	158471	PRUNE2	prune homolog 2 [Source:HGNC Symbol;Acc:HGNC:25209]	9	76611376	76906087	-1
ENSG00000121769	-1.31372	0.402282	4.47805	-14.6367	1.37e-12	1.35e-11	18.3343	2170	FABP3	fatty acid binding protein 3 [Source:HGNC Symbol;Acc:HGNC:3557]	1	31365625	31376850	-1
ENSG00000155363	-1.31255	0.402608	5.39497	-28.7583	1.58e-18	7.92e-17	32.3295	4343	MOV10	Mov10 RISC complex RNA helicase [Source:HGNC Symbol;Acc:HGNC:7200]	1	112673141	112700746	1
ENSG00000118971	-1.31154	0.402891	9.07637	-26.674	7.51e-18	3.07e-16	30.439	894	CCND2	cyclin D2 [Source:HGNC Symbol;Acc:HGNC:1583]	12	4273772	4305350	1
ENSG00000154134	-1.31145	0.402915	2.31267	-12.3572	3.51e-11	2.5e-10	15.4839	64221	ROBO3	roundabout guidance receptor 3 [Source:HGNC Symbol;Acc:HGNC:13433]	11	124865386	124881470	1
ENSG00000168056	-1.31012	0.403287	1.34742	-8.53138	2.59e-08	1.02e-07	8.92721	4054	LTBP3	latent transforming growth factor beta binding protein 3 [Source:HGNC Symbol;Acc:HGNC:6716]	11	65538805	65558930	-1
ENSG00000138604	-1.31	0.40332	6.3617	-28.5581	1.82e-18	8.93e-17	32.0648	26035	GLCE	glucuronic acid epimerase [Source:HGNC Symbol;Acc:HGNC:17855]	15	69160584	69272217	1
ENSG00000138496	-1.30763	0.403984	0.0906879	-5.77755	9.3e-06	2.35e-05	3.22051	83666	PARP9	poly(ADP-ribose) polymerase family member 9 [Source:HGNC Symbol;Acc:HGNC:24118]	3	122527924	122564577	-1
ENSG00000130787	-1.3039	0.405031	3.74326	-16.0243	2.33e-13	2.74e-12	20.3353	9026	HIP1R	huntingtin interacting protein 1 related [Source:HGNC Symbol;Acc:HGNC:18415]	12	122834453	122862960	1
ENSG00000128606	-1.30176	0.405632	6.52279	-23.5236	1e-16	2.89e-15	27.891	10234	LRRC17	leucine rich repeat containing 17 [Source:HGNC Symbol;Acc:HGNC:16895]	7	102912991	102944949	1
ENSG00000183605	-1.29999	0.406129	2.47773	-12.1449	4.85e-11	3.38e-10	15.1132	119559	SFXN4	sideroflexin 4 [Source:HGNC Symbol;Acc:HGNC:16088]	10	119140767	119165667	-1
ENSG00000064989	-1.2994	0.406296	2.47888	-13.9609	3.43e-12	3.08e-11	17.8358	10203	CALCRL	calcitonin receptor like receptor [Source:HGNC Symbol;Acc:HGNC:16709]	2	187343129	187448460	-1
ENSG00000170017	-1.29816	0.406645	5.257	-26.3684	9.54e-18	3.77e-16	30.4902	214	ALCAM	activated leukocyte cell adhesion molecule [Source:HGNC Symbol;Acc:HGNC:400]	3	105366909	105576900	1
ENSG00000005243	-1.29721	0.406912	0.38717	-7.17033	4.19e-07	1.33e-06	6.29115	51226	COPZ2	coatomer protein complex subunit zeta 2 [Source:HGNC Symbol;Acc:HGNC:19356]	17	48026167	48038030	-1
ENSG00000119042	-1.29652	0.407106	4.14268	-19.0359	7.48e-15	1.28e-13	23.803	23314	SATB2	SATB homeobox 2 [Source:HGNC Symbol;Acc:HGNC:21637]	2	199269500	199471266	-1
ENSG00000159899	-1.29631	0.407167	1.53659	-9.10962	8.54e-09	3.7e-08	10.0179	4882	NPR2	natriuretic peptide receptor 2 [Source:HGNC Symbol;Acc:HGNC:7944]	9	35792154	35809732	1
ENSG00000179094	-1.29626	0.407179	2.89907	-14.3636	1.98e-12	1.88e-11	18.3122	5187 102465532	PER1	period circadian clock 1 [Source:HGNC Symbol;Acc:HGNC:8845]	17	8140472	8156506	-1
ENSG00000136881	-1.29527	0.407461	0.740816	-6.25807	3.1e-06	8.47e-06	4.18867	570	BAAT	bile acid-CoA:amino acid N-acyltransferase [Source:HGNC Symbol;Acc:HGNC:932]	9	101360417	101383519	-1
ENSG00000131650	-1.29467	0.407628	0.607843	-5.99392	5.65e-06	1.48e-05	3.61121	79412	KREMEN2	kringle containing transmembrane protein 2 [Source:HGNC Symbol;Acc:HGNC:18797]	16	2963944	2968383	1
ENSG00000128683	-1.29462	0.407642	2.77108	-11.3602	1.68e-10	1.03e-09	13.7669	2571	GAD1	glutamate decarboxylase 1 [Source:HGNC Symbol;Acc:HGNC:4092]	2	170813213	170861151	1
ENSG00000142102	-1.29441	0.407702	2.07762	-8.43992	3.1e-08	1.2e-07	8.57102	80162	PGGHG	protein-glucosylgalactosylhydroxylysine glucosidase [Source:HGNC Symbol;Acc:HGNC:26210]	11	289135	296107	1
ENSG00000103723	-1.29317	0.408053	0.131213	-5.90673	6.9e-06	1.78e-05	3.5112	8120	AP3B2	adaptor related protein complex 3 beta 2 subunit [Source:HGNC Symbol;Acc:HGNC:567]	15	82659281	82709914	-1
ENSG00000158079	-1.29298	0.408106	4.92046	-24.7622	3.49e-17	1.18e-15	29.2029	138639	PTPDC1	protein tyrosine phosphatase domain containing 1 [Source:HGNC Symbol;Acc:HGNC:30184]	9	94030794	94109856	1
ENSG00000255921	-1.2928	0.408158	0.511147	-6.71138	1.13e-06	3.33e-06	5.25907		RP11-662I13.2		12	24949163	24960158	1
ENSG00000145423	-1.29073	0.408744	2.44196	-9.88864	2.05e-09	1.01e-08	11.2703	6423	SFRP2	secreted frizzled related protein 2 [Source:HGNC Symbol;Acc:HGNC:10777]	4	153780592	153789120	-1
ENSG00000256847	-1.28998	0.408957	1.10555	-8.41863	3.23e-08	1.25e-07	8.75181		CCND2P1	cyclin D2 pseudogene 1 [Source:HGNC Symbol;Acc:HGNC:1584]	11	63243085	63244004	1
ENSG00000177674	-1.28934	0.409138	3.73751	-17.77	2.98e-14	4.35e-13	22.4591	57085	AGTRAP	angiotensin II receptor associated protein [Source:HGNC Symbol;Acc:HGNC:13539]	1	11736084	11754802	1
ENSG00000109472	-1.28929	0.409152	5.05621	-19.665	3.88e-15	7.06e-14	24.3021	1363	CPE	carboxypeptidase E [Source:HGNC Symbol;Acc:HGNC:2303]	4	165361194	165498320	1
ENSG00000105227	-1.2885	0.409375	2.44374	-10.9232	3.44e-10	1.97e-09	13.1054	57716	PRX	periaxin [Source:HGNC Symbol;Acc:HGNC:13797]	19	40393768	40413366	-1
ENSG00000088899	-1.28728	0.409723	3.60725	-15.4976	4.49e-13	4.91e-12	19.6849	9762	LZTS3	leucine zipper tumor suppressor family member 3 [Source:HGNC Symbol;Acc:HGNC:30139]	20	3162617	3173592	-1
ENSG00000276216	-1.28687	0.40984	3.62365	-18.0475	2.18e-14	3.31e-13	22.8023		CH17-373J23.1		1	145281116	145281462	1
ENSG00000256061	-1.28679	0.409861	1.87585	-9.45567	4.49e-09	2.06e-08	10.5995	161582	DYX1C1	dyslexia susceptibility 1 candidate 1 [Source:HGNC Symbol;Acc:HGNC:21493]	15	55410525	55508234	-1
ENSG00000069667	-1.28417	0.410606	3.15637	-15.6749	3.59e-13	4.02e-12	20.0133	6095	RORA	RAR related orphan receptor A [Source:HGNC Symbol;Acc:HGNC:10258]	15	60488284	61229319	-1
ENSG00000130511	-1.28307	0.410919	3.26354	-12.4498	3.05e-11	2.2e-10	15.4078	170463	SSBP4	single stranded DNA binding protein 4 [Source:HGNC Symbol;Acc:HGNC:15676]	19	18418864	18434562	1
ENSG00000261971	-1.27922	0.412019	0.253008	-6.89977	7.5e-07	2.29e-06	5.72669		MMP25-AS1	MMP25 antisense RNA 1 [Source:HGNC Symbol;Acc:HGNC:51372]	16	3051096	3059370	-1
ENSG00000166206	-1.27806	0.412349	2.44169	-11.8082	8.2e-11	5.39e-10	14.5797	2562	GABRB3	gamma-aminobutyric acid type A receptor beta3 subunit [Source:HGNC Symbol;Acc:HGNC:4083]	15	26543546	26939539	-1
ENSG00000271155	-1.27797	0.412375	0.969989	-7.75045	1.24e-07	4.32e-07	7.40923		RP11-435O5.5		9	95506235	95507636	1
ENSG00000112139	-1.27763	0.412471	3.18349	-6.68572	1.2e-06	3.51e-06	4.52994	266727	MDGA1	MAM domain containing glycosylphosphatidylinositol anchor 1 [Source:HGNC Symbol;Acc:HGNC:19267]	6	37630679	37699306	-1
ENSG00000180190	-1.27761	0.412479	2.62654	-13.439	7.13e-12	5.95e-11	17.0512	157695	TDRP	testis development related protein [Source:HGNC Symbol;Acc:HGNC:26951]	8	489792	545781	-1
ENSG00000134042	-1.2775	0.412509	1.66682	-7.47363	2.2e-07	7.36e-07	6.66264	83876	MRO	maestro [Source:HGNC Symbol;Acc:HGNC:24121]	18	50795120	50825402	-1
ENSG00000175602	-1.27689	0.412684	1.86479	-6.99824	6.06e-07	1.88e-06	5.57922	11007	CCDC85B	coiled-coil domain containing 85B [Source:HGNC Symbol;Acc:HGNC:24926]	11	65890112	65891635	1
ENSG00000146904	-1.27596	0.412951	1.9555	-9.67893	2.99e-09	1.42e-08	10.9979	2041	EPHA1	EPH receptor A1 [Source:HGNC Symbol;Acc:HGNC:3385]	7	143390289	143408892	-1
ENSG00000199568	-1.27496	0.413237	2.57995	-11.1447	2.38e-10	1.41e-09	13.4499	26831	RNU5A-1	RNA, U5A small nuclear 1 [Source:HGNC Symbol;Acc:HGNC:10211]	15	65296051	65296166	1
ENSG00000161040	-1.27339	0.413685	2.83551	-14.1478	2.65e-12	2.44e-11	18.0232	222235	FBXL13	F-box and leucine rich repeat protein 13 [Source:HGNC Symbol;Acc:HGNC:21658]	7	102813230	103074843	-1
ENSG00000107331	-1.27323	0.413732	3.04722	-11.1745	2.27e-10	1.35e-09	13.3864	20	ABCA2	ATP binding cassette subfamily A member 2 [Source:HGNC Symbol;Acc:HGNC:32]	9	137007227	137028922	-1
ENSG00000266094	-1.2729	0.413826	0.166805	-6.53409	1.67e-06	4.78e-06	4.93102	83593	RASSF5	Ras association domain family member 5 [Source:HGNC Symbol;Acc:HGNC:17609]	1	206507530	206589448	1
ENSG00000150995	-1.27152	0.414224	3.95898	-15.1723	6.81e-13	7.12e-12	19.1744	3708	ITPR1	inositol 1,4,5-trisphosphate receptor type 1 [Source:HGNC Symbol;Acc:HGNC:6180]	3	4493348	4847840	1
ENSG00000207205	-1.27112	0.414339	1.28553	-8.18132	5.17e-08	1.92e-07	8.23162	101954267	RNVU1-15	RNA, variant U1 small nuclear 15 [Source:HGNC Symbol;Acc:HGNC:48320]	1	144412576	144412740	1
ENSG00000122547	-1.26951	0.4148	1.94448	-10.8769	3.72e-10	2.11e-09	13.1375	80820	EEPD1	endonuclease/exonuclease/phosphatase family domain containing 1 [Source:HGNC Symbol;Acc:HGNC:22223]	7	36153149	36301543	1
ENSG00000168297	-1.26924	0.414878	3.08659	-12.2965	3.85e-11	2.72e-10	15.2089	54899	PXK	PX domain containing serine/threonine kinase like [Source:HGNC Symbol;Acc:HGNC:23326]	3	58332880	58426126	1
ENSG00000167654	-1.26885	0.41499	-0.224825	-5.21124	3.49e-05	8.05e-05	1.95444	85300	ATCAY	ATCAY, caytaxin [Source:HGNC Symbol;Acc:HGNC:779]	19	3879864	3928079	1
ENSG00000125266	-1.26833	0.41514	6.30233	-33.1475	8.16e-20	5.93e-18	35.2826	1948	EFNB2	ephrin B2 [Source:HGNC Symbol;Acc:HGNC:3227]	13	106489731	106535114	-1
ENSG00000064687	-1.26768	0.415328	0.612194	-7.36405	2.78e-07	9.1e-07	6.66348	10347	ABCA7	ATP binding cassette subfamily A member 7 [Source:HGNC Symbol;Acc:HGNC:37]	19	1040101	1065572	1
ENSG00000133134	-1.26644	0.415685	1.68053	-11.0809	2.65e-10	1.55e-09	13.5397	84707	BEX2	brain expressed X-linked 2 [Source:HGNC Symbol;Acc:HGNC:30933]	X	103309346	103311046	-1
ENSG00000246705	-1.26604	0.4158	3.76026	-17.6028	3.6e-14	5.15e-13	22.2576	55766	H2AFJ	H2A histone family member J [Source:HGNC Symbol;Acc:HGNC:14456]	12	14774383	14778002	1
ENSG00000128294	-1.2657	0.415898	2.88704	-13.1741	1.04e-11	8.37e-11	16.6005	8459	TPST2	tyrosylprotein sulfotransferase 2 [Source:HGNC Symbol;Acc:HGNC:12021]	22	26521983	26596717	-1
ENSG00000188783	-1.26527	0.416022	1.87578	-9.70683	2.84e-09	1.35e-08	11.0675	5549	PRELP	proline and arginine rich end leucine rich repeat protein [Source:HGNC Symbol;Acc:HGNC:9357]	1	203475828	203491352	1
ENSG00000174791	-1.26487	0.416137	1.51801	-7.69607	1.39e-07	4.79e-07	7.16999	9610	RIN1	Ras and Rab interactor 1 [Source:HGNC Symbol;Acc:HGNC:18749]	11	66330242	66336840	-1
ENSG00000176244	-1.26405	0.416374	2.4197	-10.3313	9.41e-10	4.94e-09	12.0747	414149	ACBD7	acyl-CoA binding domain containing 7 [Source:HGNC Symbol;Acc:HGNC:17715]	10	15077523	15088776	-1
ENSG00000135835	-1.2634	0.416562	1.75054	-10.0693	1.49e-09	7.53e-09	11.7585	57710	KIAA1614	KIAA1614 [Source:HGNC Symbol;Acc:HGNC:29327]	1	180913154	180951614	1
ENSG00000254535	-1.2633	0.41659	3.44376	-16.4652	1.36e-13	1.71e-12	20.952	132430	PABPC4L	poly(A) binding protein cytoplasmic 4 like [Source:HGNC Symbol;Acc:HGNC:31955]	4	134196333	134201748	-1
ENSG00000149131	-1.26309	0.416652	3.52212	-14.1234	2.74e-12	2.52e-11	17.8329	710	SERPING1	serpin family G member 1 [Source:HGNC Symbol;Acc:HGNC:1228]	11	57597387	57614853	1
ENSG00000120075	-1.26183	0.417015	2.76993	-13.8319	4.1e-12	3.63e-11	17.5884	3215	HOXB5	homeobox B5 [Source:HGNC Symbol;Acc:HGNC:5116]	17	48591257	48593961	-1
ENSG00000163378	-1.26109	0.417229	4.01767	-12.0869	5.31e-11	3.66e-10	14.6497	285203	EOGT	EGF domain specific O-linked N-acetylglucosamine transferase [Source:HGNC Symbol;Acc:HGNC:28526]	3	68975214	69013961	-1
ENSG00000232742	-1.26047	0.417407	0.668441	-6.77669	9.81e-07	2.92e-06	5.37011		RHOQP2	ras homolog family member Q pseudogene 2 [Source:HGNC Symbol;Acc:HGNC:37836]	2	131460999	131461577	1
ENSG00000021645	-1.25994	0.41756	2.74635	-12.2889	3.89e-11	2.75e-10	15.2763	9369	NRXN3	neurexin 3 [Source:HGNC Symbol;Acc:HGNC:8010]	14	78170373	79868290	1
ENSG00000184949	-1.25834	0.418026	2.26991	-9.68859	2.94e-09	1.39e-08	10.9404	646851	FAM227A	family with sequence similarity 227 member A [Source:HGNC Symbol;Acc:HGNC:44197]	22	38578120	38656629	-1
ENSG00000072071	-1.25615	0.418659	5.13464	-21.8668	4.48e-16	1.08e-14	26.5235	22859	ADGRL1	adhesion G protein-coupled receptor L1 [Source:HGNC Symbol;Acc:HGNC:20973]	19	14147743	14206187	-1
ENSG00000164542	-1.25564	0.418807	5.03312	-20.7957	1.25e-15	2.6e-14	25.4803	23366	KIAA0895	KIAA0895 [Source:HGNC Symbol;Acc:HGNC:22206]	7	36324221	36390125	-1
ENSG00000096060	-1.25545	0.418863	5.10709	-20.3851	1.87e-15	3.76e-14	25.0469	2289	FKBP5	FK506 binding protein 5 [Source:HGNC Symbol;Acc:HGNC:3721]	6	35573585	35728583	-1
ENSG00000198932	-1.25461	0.419107	3.28593	-17.4933	4.08e-14	5.77e-13	22.2256	9737	GPRASP1	G protein-coupled receptor associated sorting protein 1 [Source:HGNC Symbol;Acc:HGNC:24834]	X	102651366	102659083	1
ENSG00000091262	-1.25434	0.419186	-0.0992976	-6.20406	3.51e-06	9.48e-06	4.23613	368 105369239	ABCC6	ATP binding cassette subfamily C member 6 [Source:HGNC Symbol;Acc:HGNC:57]	16	16148928	16223522	-1
ENSG00000272933	-1.25432	0.419192	0.267828	-4.90745	7.19e-05	0.000157846	1.1286		RP11-47A8.5		10	102642792	102644140	-1
ENSG00000168502	-1.25076	0.420226	3.46181	-14.3377	2.05e-12	1.94e-11	18.1473	23255	MTCL1	microtubule crosslinking factor 1 [Source:HGNC Symbol;Acc:HGNC:29121]	18	8705661	8832778	1
ENSG00000142920	-1.25066	0.420255	2.07855	-11.1884	2.22e-10	1.32e-09	13.6369	113451	AZIN2	antizyme inhibitor 2 [Source:HGNC Symbol;Acc:HGNC:29957]	1	33081104	33120530	1
ENSG00000256164	-1.24911	0.420708	4.83324	-16.8175	8.94e-14	1.17e-12	21.0883	103752584	CCND2-AS1	CCND2 antisense RNA 1 [Source:HGNC Symbol;Acc:HGNC:49398]	12	4248765	4276184	-1
ENSG00000132535	-1.24812	0.420996	3.54611	-12.9008	1.55e-11	1.2e-10	16.0331	1742	DLG4	discs large MAGUK scaffold protein 4 [Source:HGNC Symbol;Acc:HGNC:2903]	17	7189890	7219702	-1
ENSG00000005513	-1.24602	0.421609	4.75274	-16.8726	8.37e-14	1.1e-12	21.1723	30812	SOX8	SRY-box 8 [Source:HGNC Symbol;Acc:HGNC:11203]	16	981808	986979	1
ENSG00000112320	-1.24467	0.422004	3.49334	-15.9274	2.62e-13	3.04e-12	20.263	55084	SOBP	sine oculis binding protein homolog [Source:HGNC Symbol;Acc:HGNC:29256]	6	107489958	107660167	1
ENSG00000106006	-1.24	0.423371	3.67464	-17.8708	2.66e-14	3.94e-13	22.5858	3203	HOXA6	homeobox A6 [Source:HGNC Symbol;Acc:HGNC:5107]	7	27145396	27150603	-1
ENSG00000269054	-1.23897	0.423676	-0.101268	-5.38664	2.31e-05	5.48e-05	2.34259	105372483	CTD-2619J13.3		19	58362585	58366591	1
ENSG00000160999	-1.23798	0.423965	0.992225	-8.32192	3.91e-08	1.49e-07	8.57818	10603	SH2B2	SH2B adaptor protein 2 [Source:HGNC Symbol;Acc:HGNC:17381]	7	102285091	102321711	1
ENSG00000159842	-1.23654	0.424389	5.49559	-19.706	3.72e-15	6.82e-14	24.2671	29	ABR	active BCR-related [Source:HGNC Symbol;Acc:HGNC:81]	17	1003518	1229021	-1
ENSG00000116157	-1.23541	0.424722	3.19931	-16.3508	1.56e-13	1.93e-12	20.8598	2882	GPX7	glutathione peroxidase 7 [Source:HGNC Symbol;Acc:HGNC:4559]	1	52602372	52609051	1
ENSG00000178033	-1.23505	0.424829	2.59968	-9.9158	1.95e-09	9.62e-09	11.2767	254228	FAM26E	family with sequence similarity 26 member E [Source:HGNC Symbol;Acc:HGNC:21568]	6	116511646	116524792	1
ENSG00000141526	-1.23341	0.425312	1.37307	-7.68037	1.43e-07	4.93e-07	7.16923	9123 102465472	SLC16A3	solute carrier family 16 member 3 [Source:HGNC Symbol;Acc:HGNC:10924]	17	82228397	82261129	1
ENSG00000008513	-1.23197	0.425735	3.87958	-17.2247	5.55e-14	7.56e-13	21.7824	6482	ST3GAL1	ST3 beta-galactoside alpha-2,3-sialyltransferase 1 [Source:HGNC Symbol;Acc:HGNC:10862]	8	133454848	133571940	-1
ENSG00000005249	-1.23193	0.425747	4.03404	-20.0075	2.73e-15	5.17e-14	24.8603	5577	PRKAR2B	protein kinase cAMP-dependent type II regulatory subunit beta [Source:HGNC Symbol;Acc:HGNC:9392]	7	107044649	107161811	1
ENSG00000117298	-1.23128	0.425938	5.4469	-24.1495	5.85e-17	1.83e-15	28.5807	1889	ECE1	endothelin converting enzyme 1 [Source:HGNC Symbol;Acc:HGNC:3146]	1	21217247	21345504	-1
ENSG00000163840	-1.2306	0.426139	1.56138	-9.31131	5.86e-09	2.63e-08	10.3943	151636	DTX3L	deltex E3 ubiquitin ligase 3L [Source:HGNC Symbol;Acc:HGNC:30323]	3	122564238	122575203	1
ENSG00000131242	-1.23036	0.426212	1.59508	-9.32396	5.72e-09	2.57e-08	10.4111	84440 100616248	RAB11FIP4	RAB11 family interacting protein 4 [Source:HGNC Symbol;Acc:HGNC:30267]	17	31391624	31538217	1
ENSG00000141858	-1.2289	0.426642	4.66329	-20.0978	2.5e-15	4.79e-14	24.8303		SAMD1	sterile alpha motif domain containing 1 [Source:HGNC Symbol;Acc:HGNC:17958]	19	14087840	14091036	-1
ENSG00000230148	-1.2287	0.426701	3.33932	-16.3258	1.61e-13	1.98e-12	20.7987	100874362	HOXB-AS1	HOXB cluster antisense RNA 1 [Source:HGNC Symbol;Acc:HGNC:43744]	17	48543551	48551250	1
ENSG00000173801	-1.22842	0.426785	5.36495	-21.7089	5.2e-16	1.23e-14	26.3297	3728	JUP	junction plakoglobin [Source:HGNC Symbol;Acc:HGNC:6207]	17	41754604	41786931	-1
ENSG00000263874	-1.22789	0.426941	3.27478	-15.9298	2.61e-13	3.04e-12	20.3125		LINC00672	long intergenic non-protein coding RNA 672 [Source:HGNC Symbol;Acc:HGNC:44353]	17	38925168	38929384	1
ENSG00000272593	-1.22788	0.426946	0.63424	-6.59955	1.45e-06	4.18e-06	4.98121		RP11-339B21.11		9	128391461	128392016	1
ENSG00000159214	-1.22777	0.426975	0.890498	-7.28275	3.3e-07	1.07e-06	6.4288	149473	CCDC24	coiled-coil domain containing 24 [Source:HGNC Symbol;Acc:HGNC:28688]	1	43991359	43996528	1
ENSG00000272086	-1.2268	0.427264	1.36666	-8.57721	2.37e-08	9.42e-08	9.00922		CTD-2186M15.3		5	32174471	32175272	1
ENSG00000269416	-1.22589	0.427535	3.34367	-14.5472	1.55e-12	1.5e-11	18.4638	104472717	LINC01224	long intergenic non-protein coding RNA 1224 [Source:HGNC Symbol;Acc:HGNC:49676]	19	23399233	23416075	-1
ENSG00000184451	-1.22579	0.427565	0.777746	-6.29392	2.86e-06	7.87e-06	4.25897	2826	CCR10	C-C motif chemokine receptor 10 [Source:HGNC Symbol;Acc:HGNC:4474]	17	42678889	42683917	-1
ENSG00000136068	-1.22509	0.42777	7.44489	-33.3951	6.99e-20	5.26e-18	35.365	2317	FLNB	filamin B [Source:HGNC Symbol;Acc:HGNC:3755]	3	58008400	58172251	1
ENSG00000138696	-1.22403	0.428085	2.68708	-13.9855	3.32e-12	2.98e-11	17.8226	658	BMPR1B	bone morphogenetic protein receptor type 1B [Source:HGNC Symbol;Acc:HGNC:1077]	4	94757968	95158448	1
ENSG00000023171	-1.22366	0.428196	3.06861	-12.8489	1.68e-11	1.29e-10	16.0652	57476	GRAMD1B	GRAM domain containing 1B [Source:HGNC Symbol;Acc:HGNC:29214]	11	123358428	123627774	1
ENSG00000145284	-1.22316	0.428344	4.64608	-18.8551	9.06e-15	1.51e-13	23.4974	79966	SCD5	stearoyl-CoA desaturase 5 [Source:HGNC Symbol;Acc:HGNC:21088]	4	82629539	82798857	-1
ENSG00000130529	-1.223	0.428391	1.39539	-7.52775	1.97e-07	6.63e-07	6.83968	54795	TRPM4	transient receptor potential cation channel subfamily M member 4 [Source:HGNC Symbol;Acc:HGNC:17993]	19	49157741	49211836	1
ENSG00000115226	-1.22223	0.42862	3.54003	-13.9409	3.53e-12	3.15e-11	17.5664	64838	FNDC4	fibronectin type III domain containing 4 [Source:HGNC Symbol;Acc:HGNC:20239]	2	27491883	27495245	-1
ENSG00000139835	-1.2219	0.428716	3.26991	-15.7566	3.24e-13	3.67e-12	20.0909	79774	GRTP1	growth hormone regulated TBC protein 1 [Source:HGNC Symbol;Acc:HGNC:20310]	13	113324164	113364148	-1
ENSG00000008086	-1.221	0.428986	4.03546	-16.7022	1.02e-13	1.32e-12	21.1142	6792	CDKL5	cyclin dependent kinase like 5 [Source:HGNC Symbol;Acc:HGNC:11411]	X	18425583	18653629	1
ENSG00000160888	-1.22005	0.429269	4.81089	-17.8518	2.72e-14	4.01e-13	22.3261	9592	IER2	immediate early response 2 [Source:HGNC Symbol;Acc:HGNC:28871]	19	13150415	13154908	1
ENSG00000166446	-1.21915	0.429535	1.21008	-8.4794	2.87e-08	1.12e-07	8.84808	124359	CDYL2	chromodomain Y-like 2 [Source:HGNC Symbol;Acc:HGNC:23030]	16	80597906	80804329	-1
ENSG00000197696	-1.21899	0.429582	1.33645	-7.71454	1.34e-07	4.63e-07	7.24858	4828	NMB	neuromedin B [Source:HGNC Symbol;Acc:HGNC:7842]	15	84655129	84658563	-1
ENSG00000118495	-1.21864	0.429688	3.5908	-13.7359	4.69e-12	4.08e-11	17.2596	5325	PLAGL1	PLAG1 like zinc finger 1 [Source:HGNC Symbol;Acc:HGNC:9046]	6	143940300	144064599	-1
ENSG00000134508	-1.21548	0.430629	0.608686	-5.70949	1.09e-05	2.72e-05	2.94566	91768	CABLES1	Cdk5 and Abl enzyme substrate 1 [Source:HGNC Symbol;Acc:HGNC:25097]	18	23134564	23260467	1
ENSG00000117152	-1.21202	0.431662	1.61072	-8.26371	4.39e-08	1.66e-07	8.3217	5999	RGS4	regulator of G-protein signaling 4 [Source:HGNC Symbol;Acc:HGNC:10000]	1	163068775	163076802	1
ENSG00000113645	-1.21201	0.431667	2.88508	-11.0526	2.78e-10	1.62e-09	13.2141	23286	WWC1	WW and C2 domain containing 1 [Source:HGNC Symbol;Acc:HGNC:29435]	5	168291651	168472303	1
ENSG00000139197	-1.21136	0.431861	5.54583	-24.0025	6.63e-17	2.02e-15	28.4349	5830	PEX5	peroxisomal biogenesis factor 5 [Source:HGNC Symbol;Acc:HGNC:9719]	12	7188685	7218574	1
ENSG00000136010	-1.20951	0.432415	2.73168	-12.0135	5.95e-11	4.06e-10	14.8392	160428	ALDH1L2	aldehyde dehydrogenase 1 family member L2 [Source:HGNC Symbol;Acc:HGNC:26777]	12	105019784	105084577	-1
ENSG00000214063	-1.20901	0.432564	4.47712	-15.893	2.74e-13	3.16e-12	20	7106	TSPAN4	tetraspanin 4 [Source:HGNC Symbol;Acc:HGNC:11859]	11	842808	867116	1
ENSG00000207501	-1.20865	0.432674	3.27881	-15.9683	2.49e-13	2.91e-12	20.3594	101954266	RNVU1-14	RNA, variant U1 small nuclear 14 [Source:HGNC Symbol;Acc:HGNC:48319]	1	145281116	145281279	1
ENSG00000268912	-1.20863	0.432678	1.01523	-8.10015	6.09e-08	2.24e-07	8.1208		CTD-2619J13.17		19	58428632	58431148	-1
ENSG00000279692	-1.20843	0.43274	3.72629	-14.2724	2.24e-12	2.1e-11	17.9917		RP11-1055B8.1		17	81395609	81397144	-1
ENSG00000170006	-1.20822	0.432804	0.965409	-7.1459	4.41e-07	1.4e-06	6.11387	201799	TMEM154	transmembrane protein 154 [Source:HGNC Symbol;Acc:HGNC:26489]	4	152618632	152680165	-1
ENSG00000142552	-1.20758	0.432994	1.27234	-6.77453	9.86e-07	2.94e-06	5.22609	57333	RCN3	reticulocalbin 3 [Source:HGNC Symbol;Acc:HGNC:21145]	19	49527618	49546962	1
ENSG00000086289	-1.20641	0.433346	4.24626	-17.1331	6.17e-14	8.33e-13	21.5922	54749	EPDR1	ependymin related 1 [Source:HGNC Symbol;Acc:HGNC:17572]	7	37683843	37951941	1
ENSG00000090776	-1.2054	0.433649	5.19961	-23.1784	1.36e-16	3.78e-15	27.7452	1947	EFNB1	ephrin B1 [Source:HGNC Symbol;Acc:HGNC:3226]	X	68828997	68842147	1
ENSG00000225697	-1.20499	0.433773	4.95758	-26.0044	1.27e-17	4.86e-16	30.2357	65010 102465495	SLC26A6	solute carrier family 26 member 6 [Source:HGNC Symbol;Acc:HGNC:14472]	3	48625723	48635493	-1
ENSG00000147027	-1.2038	0.434132	4.65495	-18.3886	1.5e-14	2.36e-13	22.9719	83604	TMEM47	transmembrane protein 47 [Source:HGNC Symbol;Acc:HGNC:18515]	X	34627064	34657288	-1
ENSG00000177380	-1.20335	0.434265	2.93835	-13.3106	8.57e-12	7.01e-11	16.7879	8541	PPFIA3	PTPRF interacting protein alpha 3 [Source:HGNC Symbol;Acc:HGNC:9247]	19	49119389	49151026	1
ENSG00000272661	-1.20258	0.434496	1.84002	-10.8595	3.83e-10	2.17e-09	13.1265		RP4-548D19.3		7	151240399	151240972	1
ENSG00000267765	-1.20206	0.434653	1.12596	-7.98283	7.71e-08	2.79e-07	7.85479		CTD-3193K9.3		17	42683187	42699466	-1
ENSG00000115041	-1.20081	0.435031	0.00617127	-5.06864	4.9e-05	0.00011027	1.56681	30818	KCNIP3	potassium voltage-gated channel interacting protein 3 [Source:HGNC Symbol;Acc:HGNC:15523]	2	95297304	95386083	1
ENSG00000215386	-1.20077	0.435042	2.15679	-10.029	1.6e-09	8.03e-09	11.5892		MIR99AHG	mir-99a-let-7c cluster host gene [Source:HGNC Symbol;Acc:HGNC:1274]	21	15928296	16627397	1
ENSG00000080561	-1.20031	0.435182	0.807608	-7.6943	1.39e-07	4.8e-07	7.32039	11043	MID2	midline 2 [Source:HGNC Symbol;Acc:HGNC:7096]	X	107825755	107927193	1
ENSG00000196739	-1.19992	0.435298	3.7246	-16.0131	2.36e-13	2.77e-12	20.3189	85301	COL27A1	collagen type XXVII alpha 1 chain [Source:HGNC Symbol;Acc:HGNC:22986]	9	114155560	114312511	1
ENSG00000267282	-1.19753	0.436022	1.20517	-7.58607	1.74e-07	5.91e-07	7.00627		CTB-129P6.4		19	44882027	44890876	-1
ENSG00000233836	-1.19717	0.43613	2.96778	-13.1218	1.13e-11	8.99e-11	16.499		RP11-255H23.2		19	23762944	23833314	1
ENSG00000274210	-1.19696	0.436193	2.85139	-11.0906	2.61e-10	1.53e-09	13.2876		U1	U1 spliceosomal RNA [Source:RFAM;Acc:RF00003]	1	148522601	148522765	1
ENSG00000167619	-1.19637	0.436371	0.662602	-6.80909	9.14e-07	2.74e-06	5.4405	284339	TMEM145	transmembrane protein 145 [Source:HGNC Symbol;Acc:HGNC:26912]	19	42313325	42325062	1
ENSG00000149257	-1.19517	0.436735	7.93849	-17.4315	4.38e-14	6.15e-13	21.4693	871	SERPINH1	serpin family H member 1 [Source:HGNC Symbol;Acc:HGNC:1546]	11	75562056	75572783	1
ENSG00000280064	-1.19489	0.436819	3.67487	-15.8184	3e-13	3.44e-12	20.0804		RP11-205M5.3		8	37858949	37861333	1
ENSG00000171574	-1.19456	0.436921	4.69146	-22.1078	3.58e-16	8.93e-15	26.8317	201514	ZNF584	zinc finger protein 584 [Source:HGNC Symbol;Acc:HGNC:27318]	19	58401504	58418327	1
ENSG00000263171	-1.19412	0.437052	0.447733	-6.88937	7.67e-07	2.33e-06	5.66155		RP11-542C16.1		17	7352687	7354944	-1
ENSG00000171843	-1.19403	0.437079	5.87977	-28.7342	1.61e-18	8.02e-17	32.2439	4300	MLLT3	MLLT3, super elongation complex subunit [Source:HGNC Symbol;Acc:HGNC:7136]	9	20341665	20622543	-1
ENSG00000091592	-1.19279	0.437457	3.98922	-16.3579	1.55e-13	1.91e-12	20.6956	22861	NLRP1	NLR family pyrin domain containing 1 [Source:HGNC Symbol;Acc:HGNC:14374]	17	5499427	5619424	-1
ENSG00000188385	-1.19008	0.438278	0.226691	-5.54654	1.59e-05	3.87e-05	2.64706	282973	JAKMIP3	Janus kinase and microtubule interacting protein 3 [Source:HGNC Symbol;Acc:HGNC:23523]	10	132104671	132184809	1
ENSG00000214530	-1.1899	0.438332	2.90681	-12.2212	4.32e-11	3.03e-10	15.1272	10809	STARD10	StAR related lipid transfer domain containing 10 [Source:HGNC Symbol;Acc:HGNC:10666]	11	72754729	72794168	-1
ENSG00000249996	-1.18887	0.438646	0.600425	-6.38311	2.34e-06	6.52e-06	4.49809		RP11-359P5.1		5	123036271	123054667	1
ENSG00000135587	-1.18846	0.438772	2.72616	-11.4652	1.42e-10	8.8e-10	13.9463	6610	SMPD2	sphingomyelin phosphodiesterase 2 [Source:HGNC Symbol;Acc:HGNC:11121]	6	109440763	109443919	1
ENSG00000001460	-1.18819	0.438854	1.6108	-8.96815	1.12e-08	4.71e-08	9.72135	90529	STPG1	sperm tail PG-rich repeat containing 1 [Source:HGNC Symbol;Acc:HGNC:28070]	1	24356999	24416934	-1
ENSG00000256235	-1.18676	0.43929	2.79128	-11.822	8.03e-11	5.29e-10	14.5149	85027	SMIM3	small integral membrane protein 3 [Source:HGNC Symbol;Acc:HGNC:30248]	5	150777946	150796734	1
ENSG00000102003	-1.18675	0.439292	0.706696	-6.83515	8.63e-07	2.6e-06	5.48858	6855	SYP	synaptophysin [Source:HGNC Symbol;Acc:HGNC:11506]	X	49187804	49200259	-1
ENSG00000132763	-1.18385	0.440176	6.99107	-25.9207	1.36e-17	5.14e-16	29.9265	25974	MMACHC	methylmalonic aciduria (cobalamin deficiency) cblC type, with homocystinuria [Source:HGNC Symbol;Acc:HGNC:24525]	1	45500053	45513382	1
ENSG00000240771	-1.18362	0.440247	4.07373	-21.1138	9.16e-16	2.02e-14	25.9783	115557	ARHGEF25	Rho guanine nucleotide exchange factor 25 [Source:HGNC Symbol;Acc:HGNC:30275]	12	57610180	57619379	1
ENSG00000175048	-1.18345	0.440298	1.4461	-8.80629	1.52e-08	6.26e-08	9.4422	79683	ZDHHC14	zinc finger DHHC-type containing 14 [Source:HGNC Symbol;Acc:HGNC:20341]	6	157381133	157678146	1
ENSG00000187240	-1.18344	0.4403	6.89746	-19.8262	3.29e-15	6.09e-14	24.2284	79659	DYNC2H1	dynein cytoplasmic 2 heavy chain 1 [Source:HGNC Symbol;Acc:HGNC:2962]	11	103109431	103479863	1
ENSG00000105808	-1.18323	0.440366	0.173869	-5.23296	3.32e-05	7.67e-05	1.91899	10156 102724229	RASA4	RAS p21 protein activator 4 [Source:HGNC Symbol;Acc:HGNC:23181]	7	102573807	102616757	-1
ENSG00000276991	-1.18266	0.440539	0.333342	-5.91314	6.8e-06	1.76e-05	3.47868		MIAT_exon5_3	Myocardial infarction associated transcript exon 5 conserved region 3 [Source:RFAM;Acc:RF01877]	22	26673254	26673630	1
ENSG00000198947	-1.18231	0.440645	5.89592	-26.25	1.05e-17	4.09e-16	30.3001	1756	DMD	dystrophin [Source:HGNC Symbol;Acc:HGNC:2928]	X	31097677	33339441	-1
ENSG00000032444	-1.18142	0.440916	3.19604	-11.7117	9.55e-11	6.16e-10	14.2368	10908	PNPLA6	patatin like phospholipase domain containing 6 [Source:HGNC Symbol;Acc:HGNC:16268]	19	7534004	7561764	1
ENSG00000260092	-1.18121	0.44098	0.525524	-5.93091	6.53e-06	1.69e-05	3.47899		RP11-77K12.7		16	75528532	75545428	-1
ENSG00000169918	-1.18081	0.441104	-0.182314	-5.11049	4.43e-05	0.000100634	1.70423	161725	OTUD7A	OTU deubiquitinase 7A [Source:HGNC Symbol;Acc:HGNC:20718]	15	31475398	31870789	-1
ENSG00000069974	-1.18023	0.441282	3.04499	-13.2632	9.17e-12	7.45e-11	16.6911	5873	RAB27A	RAB27A, member RAS oncogene family [Source:HGNC Symbol;Acc:HGNC:9766]	15	55202966	55319113	-1
ENSG00000088280	-1.17907	0.441638	5.56321	-24.386	4.79e-17	1.54e-15	28.769	55616	ASAP3	ArfGAP with SH3 domain, ankyrin repeat and PH domain 3 [Source:HGNC Symbol;Acc:HGNC:14987]	1	23428563	23484568	-1
ENSG00000135046	-1.17826	0.441885	4.98602	-10.8646	3.79e-10	2.15e-09	12.3845	301	ANXA1	annexin A1 [Source:HGNC Symbol;Acc:HGNC:533]	9	73151757	73170393	1
ENSG00000142694	-1.17605	0.442561	2.03818	-8.5457	2.52e-08	9.96e-08	8.78579	55194	EVA1B	eva-1 homolog B [Source:HGNC Symbol;Acc:HGNC:25558]	1	36322031	36324154	-1
ENSG00000131724	-1.17573	0.442661	5.01028	-21.9494	4.15e-16	1.01e-14	26.6206	3597	IL13RA1	interleukin 13 receptor subunit alpha 1 [Source:HGNC Symbol;Acc:HGNC:5974]	X	118727572	118794539	1
ENSG00000258021	-1.17491	0.442911	0.365544	-6.18421	3.67e-06	9.88e-06	4.09462		RP11-1100L3.4		12	51900565	51901336	1
ENSG00000245105	-1.1734	0.443375	0.353558	-6.48442	1.87e-06	5.29e-06	4.77861	144571	A2M-AS1	A2M antisense RNA 1 (head to head) [Source:HGNC Symbol;Acc:HGNC:27057]	12	9065177	9068060	1
ENSG00000144619	-1.17303	0.443488	3.93429	-16.3065	1.65e-13	2.01e-12	20.6421	152330	CNTN4	contactin 4 [Source:HGNC Symbol;Acc:HGNC:2174]	3	2098813	3057956	1
ENSG00000121966	-1.17302	0.443493	4.79718	-14.7242	1.22e-12	1.21e-11	18.3765	7852	CXCR4	C-X-C motif chemokine receptor 4 [Source:HGNC Symbol;Acc:HGNC:2561]	2	136114349	136118165	-1
ENSG00000137478	-1.16917	0.444678	4.44287	-13.6373	5.39e-12	4.62e-11	16.9148	9873	FCHSD2	FCH and double SH3 domains 2 [Source:HGNC Symbol;Acc:HGNC:29114]	11	72836745	73142261	-1
ENSG00000112715	-1.16915	0.444683	4.48795	-19.8063	3.35e-15	6.2e-14	24.555	7422	VEGFA	vascular endothelial growth factor A [Source:HGNC Symbol;Acc:HGNC:12680]	6	43770184	43786487	1
ENSG00000154025	-1.16891	0.444757	0.817253	-6.20707	3.48e-06	9.42e-06	4.04778	125206	SLC5A10	solute carrier family 5 member 10 [Source:HGNC Symbol;Acc:HGNC:23155]	17	18950345	19022595	1
ENSG00000075426	-1.16618	0.445599	1.9855	-9.84402	2.22e-09	1.08e-08	11.2897	2355	FOSL2	FOS like 2, AP-1 transcription factor subunit [Source:HGNC Symbol;Acc:HGNC:3798]	2	28392448	28417312	1
ENSG00000144036	-1.16538	0.445846	4.74381	-20.2271	2.19e-15	4.28e-14	24.9455	23233	EXOC6B	exocyst complex component 6B [Source:HGNC Symbol;Acc:HGNC:17085]	2	72175984	72826041	-1
ENSG00000196576	-1.1645	0.446118	6.39274	-23.7461	8.27e-17	2.42e-15	28.1002	23654	PLXNB2	plexin B2 [Source:HGNC Symbol;Acc:HGNC:9104]	22	50274979	50307627	-1
ENSG00000278588	-1.16447	0.446127	7.27587	-26.3843	9.42e-18	3.75e-16	30.2884	8346	HIST1H2BI	histone cluster 1, H2bi [Source:HGNC Symbol;Acc:HGNC:4756]	6	26272976	26273356	1
ENSG00000114656	-1.16337	0.446469	2.64014	-12.7492	1.95e-11	1.47e-10	16.0086	57501	KIAA1257	KIAA1257 [Source:HGNC Symbol;Acc:HGNC:29231]	3	128909866	129002690	-1
ENSG00000109944	-1.1629	0.446613	1.10852	-7.09039	4.97e-07	1.56e-06	5.95874	79864	C11orf63	chromosome 11 open reading frame 63 [Source:HGNC Symbol;Acc:HGNC:26288]	11	122882528	122959798	1
ENSG00000115556	-1.16167	0.446995	3.11688	-12.1978	4.47e-11	3.13e-10	15.0382	84812	PLCD4	phospholipase C delta 4 [Source:HGNC Symbol;Acc:HGNC:9062]	2	218607765	218637184	1
ENSG00000131849	-1.16145	0.447062	1.68696	-8.6341	2.12e-08	8.5e-08	9.0455	7691	ZNF132	zinc finger protein 132 [Source:HGNC Symbol;Acc:HGNC:12916]	19	58432814	58440222	-1
ENSG00000255874	-1.16123	0.447131	0.0787897	-5.34939	2.52e-05	5.95e-05	2.21401	283487	LINC00346	long intergenic non-protein coding RNA 346 [Source:HGNC Symbol;Acc:HGNC:27492]	13	110863987	110870251	-1
ENSG00000145730	-1.16121	0.447136	6.7854	-27.0786	5.5e-18	2.31e-16	30.8799	5066	PAM	peptidylglycine alpha-amidating monooxygenase [Source:HGNC Symbol;Acc:HGNC:8596]	5	102753981	103031105	1
ENSG00000244041	-1.15898	0.447829	0.594875	-6.2491	3.17e-06	8.62e-06	4.19328	401232	LINC01011	long intergenic non-protein coding RNA 1011 [Source:HGNC Symbol;Acc:HGNC:33812]	6	2987967	2991173	1
ENSG00000185745	-1.15844	0.447996	2.81052	-10.5353	6.62e-10	3.57e-09	12.3328	3434	IFIT1	interferon induced protein with tetratricopeptide repeats 1 [Source:HGNC Symbol;Acc:HGNC:5407]	10	89392546	89406486	1
ENSG00000110057	-1.14979	0.450692	0.400671	-6.45353	2e-06	5.64e-06	4.69826	81622	UNC93B1	unc-93 homolog B1 (C. elegans) [Source:HGNC Symbol;Acc:HGNC:13481]	11	67991104	68004982	-1
ENSG00000176788	-1.1487	0.45103	5.56417	-24.7261	3.6e-17	1.22e-15	29.0632	10409	BASP1	brain abundant membrane attached signal protein 1 [Source:HGNC Symbol;Acc:HGNC:957]	5	17065598	17276843	1
ENSG00000175198	-1.14843	0.451115	4.6821	-17.3901	4.59e-14	6.4e-13	21.8044	5095	PCCA	propionyl-CoA carboxylase alpha subunit [Source:HGNC Symbol;Acc:HGNC:8653]	13	100089015	100530437	1
ENSG00000108370	-1.14539	0.452067	0.898344	-7.54382	1.9e-07	6.42e-07	6.98123	8787	RGS9	regulator of G-protein signaling 9 [Source:HGNC Symbol;Acc:HGNC:10004]	17	65100812	65227703	1
ENSG00000110002	-1.14497	0.4522	2.89627	-11.3758	1.64e-10	1e-09	13.7527	4013	VWA5A	von Willebrand factor A domain containing 5A [Source:HGNC Symbol;Acc:HGNC:6658]	11	124115362	124147721	1
ENSG00000064042	-1.14479	0.452256	4.7576	-13.5202	6.36e-12	5.36e-11	16.6723	22998	LIMCH1	LIM and calponin homology domains 1 [Source:HGNC Symbol;Acc:HGNC:29191]	4	41359607	41700044	1
ENSG00000105520	-1.1438	0.452566	1.46346	-7.57197	1.79e-07	6.08e-07	6.9133	64748	PLPPR2	phospholipid phosphatase related 2 [Source:HGNC Symbol;Acc:HGNC:29566]	19	11355386	11365698	1
ENSG00000276314	-1.14282	0.452875	1.03866	-7.91062	8.93e-08	3.19e-07	7.72122	91380	SNORD107	small nucleolar RNA, C/D box 107 [Source:HGNC Symbol;Acc:HGNC:32771]	15	24981994	24982068	1
ENSG00000089060	-1.14174	0.453212	1.51415	-8.24533	4.55e-08	1.71e-07	8.30248	80024	SLC8B1	solute carrier family 8 member B1 [Source:HGNC Symbol;Acc:HGNC:26175]	12	113298759	113359493	-1
ENSG00000161638	-1.14089	0.453479	5.50899	-19.2868	5.74e-15	1.01e-13	23.8087	3678	ITGA5	integrin subunit alpha 5 [Source:HGNC Symbol;Acc:HGNC:6141]	12	54395261	54419460	-1
ENSG00000092758	-1.14067	0.453549	2.47554	-8.12159	5.83e-08	2.15e-07	7.80975	1299	COL9A3	collagen type IX alpha 3 chain [Source:HGNC Symbol;Acc:HGNC:2219]	20	62816244	62841159	1
ENSG00000051382	-1.14035	0.453651	2.76325	-12.663	2.21e-11	1.65e-10	15.8469	5291	PIK3CB	phosphatidylinositol-4,5-bisphosphate 3-kinase catalytic subunit beta [Source:HGNC Symbol;Acc:HGNC:8976]	3	138652699	138834938	-1
ENSG00000156675	-1.13978	0.45383	5.15479	-21.3653	7.19e-16	1.63e-14	26.0229	80223	RAB11FIP1	RAB11 family interacting protein 1 [Source:HGNC Symbol;Acc:HGNC:30265]	8	37858618	37899467	-1
ENSG00000146411	-1.13831	0.454292	1.63691	-5.09631	4.59e-05	0.000103753	1.23554	154091	SLC2A12	solute carrier family 2 member 12 [Source:HGNC Symbol;Acc:HGNC:18067]	6	133988697	134052636	-1
ENSG00000152380	-1.1383	0.454293	1.07483	-7.47743	2.19e-07	7.3e-07	6.80066	167555	FAM151B	family with sequence similarity 151 member B [Source:HGNC Symbol;Acc:HGNC:33716]	5	80487969	80542563	1
ENSG00000111186	-1.13732	0.454604	1.55091	-9.28196	6.19e-09	2.76e-08	10.3351	81029	WNT5B	Wnt family member 5B [Source:HGNC Symbol;Acc:HGNC:16265]	12	1529891	1647243	1
ENSG00000136002	-1.13689	0.454739	0.563286	-5.64604	1.26e-05	3.12e-05	2.80511	50649	ARHGEF4	Rho guanine nucleotide exchange factor 4 [Source:HGNC Symbol;Acc:HGNC:684]	2	130836916	131047263	1
ENSG00000168916	-1.13621	0.454955	6.95561	-26.4882	8.68e-18	3.51e-16	30.3932	57507	ZNF608	zinc finger protein 608 [Source:HGNC Symbol;Acc:HGNC:29238]	5	124636913	124748807	-1
ENSG00000171729	-1.13481	0.455396	3.30141	-12.148	4.83e-11	3.37e-10	14.9129	55092	TMEM51	transmembrane protein 51 [Source:HGNC Symbol;Acc:HGNC:25488]	1	15152532	15220480	1
ENSG00000135931	-1.13269	0.456066	4.71844	-21.0224	1e-15	2.17e-14	25.7603	80210	ARMC9	armadillo repeat containing 9 [Source:HGNC Symbol;Acc:HGNC:20730]	2	231198546	231374837	1
ENSG00000250742	-1.12984	0.456965	4.27065	-18.7326	1.03e-14	1.7e-13	23.4325	400043	RP11-834C11.4		12	54126098	54142493	1
ENSG00000172216	-1.12843	0.457413	1.49194	-8.302	4.07e-08	1.54e-07	8.42274	1051	CEBPB	CCAAT/enhancer binding protein beta [Source:HGNC Symbol;Acc:HGNC:1834]	20	50190734	50192689	1
ENSG00000114107	-1.12811	0.457514	4.26408	-14.4912	1.67e-12	1.61e-11	18.1686	80321	CEP70	centrosomal protein 70 [Source:HGNC Symbol;Acc:HGNC:29972]	3	138494344	138594538	-1
ENSG00000186523	-1.12776	0.457624	1.15275	-8.05961	6.61e-08	2.41e-07	8.00352	85002 653333 100287013	FAM86B1	family with sequence similarity 86 member B1 [Source:HGNC Symbol;Acc:HGNC:28268]	8	12182096	12194133	-1
ENSG00000199377	-1.12774	0.457632	-0.173316	-5.69365	1.13e-05	2.81e-05	3.06932	26828	RNU5F-1	RNA, U5F small nuclear 1 [Source:HGNC Symbol;Acc:HGNC:10216]	1	44721786	44721902	-1
ENSG00000124602	-1.12591	0.458213	0.491115	-7.18368	4.07e-07	1.3e-06	6.2926	222643	UNC5CL	unc-5 family C-terminal like [Source:HGNC Symbol;Acc:HGNC:21203]	6	41026911	41039217	-1
ENSG00000105245	-1.12591	0.458213	2.69955	-12.5237	2.73e-11	1.99e-10	15.6458	9253	NUMBL	NUMB like, endocytic adaptor protein [Source:HGNC Symbol;Acc:HGNC:8061]	19	40665905	40690972	-1
ENSG00000257360	-1.12537	0.458385	0.872308	-6.63073	1.35e-06	3.93e-06	4.99284		RP11-74K11.1		12	94140077	94141337	1
ENSG00000262456	-1.12481	0.458564	0.598844	-5.33668	2.6e-05	6.11e-05	2.06763		RP1-59D14.1		17	2384847	2386664	1
ENSG00000143479	-1.12416	0.458768	3.01808	-11.7342	9.22e-11	5.97e-10	14.3132	8444	DYRK3	dual specificity tyrosine phosphorylation regulated kinase 3 [Source:HGNC Symbol;Acc:HGNC:3094]	1	206635536	206684419	1
ENSG00000198108	-1.12376	0.458897	1.11967	-5.641	1.28e-05	3.15e-05	2.65955	337876	CHSY3	chondroitin sulfate synthase 3 [Source:HGNC Symbol;Acc:HGNC:24293]	5	129904472	130186634	1
ENSG00000171223	-1.1231	0.459105	2.07798	-9.75078	2.62e-09	1.26e-08	11.0933	3726	JUNB	JunB proto-oncogene, AP-1 transcription factor subunit [Source:HGNC Symbol;Acc:HGNC:6205]	19	12791496	12793315	1
ENSG00000248593	-1.12307	0.459117	1.26218	-7.84796	1.02e-07	3.59e-07	7.54009	171220	DSTNP2	destrin, actin depolymerizing factor pseudogene 2 [Source:HGNC Symbol;Acc:HGNC:34546]	12	6884682	6885786	1
ENSG00000142089	-1.12239	0.459333	5.23628	-25.4008	2.07e-17	7.54e-16	29.686	10410	IFITM3	interferon induced transmembrane protein 3 [Source:HGNC Symbol;Acc:HGNC:5414]	11	319669	327537	-1
ENSG00000239039	-1.12234	0.459349	2.51114	-9.74748	2.64e-09	1.26e-08	10.9814	692084	SNORD13	small nucleolar RNA, C/D box 13 [Source:HGNC Symbol;Acc:HGNC:32711]	8	33513475	33513578	1
ENSG00000152229	-1.12127	0.459688	1.71946	-7.99018	7.6e-08	2.75e-07	7.72798	9050	PSTPIP2	proline-serine-threonine phosphatase interacting protein 2 [Source:HGNC Symbol;Acc:HGNC:9581]	18	45983536	46072272	-1
ENSG00000101577	-1.12027	0.460008	5.57462	-25.0331	2.79e-17	9.84e-16	29.3239	9663	LPIN2	lipin 2 [Source:HGNC Symbol;Acc:HGNC:14450]	18	2916994	3013315	-1
ENSG00000167700	-1.11971	0.460186	2.23606	-10.3103	9.76e-10	5.1e-09	12.0724	113655	MFSD3	major facilitator superfamily domain containing 3 [Source:HGNC Symbol;Acc:HGNC:25157]	8	144509074	144511213	1
ENSG00000156150	-1.11927	0.460326	2.55948	-9.53713	3.87e-09	1.8e-08	10.5766	257	ALX3	ALX homeobox 3 [Source:HGNC Symbol;Acc:HGNC:449]	1	110059994	110070700	-1
ENSG00000174871	-1.11841	0.4606	2.40281	-10.6922	5.07e-10	2.81e-09	12.7053	254263	CNIH2	cornichon family AMPA receptor auxiliary protein 2 [Source:HGNC Symbol;Acc:HGNC:28744]	11	66278190	66285301	1
ENSG00000064012	-1.11778	0.460802	2.36826	-10.1309	1.33e-09	6.81e-09	11.7173	841	CASP8	caspase 8 [Source:HGNC Symbol;Acc:HGNC:1509]	2	201233443	201287711	1
ENSG00000224713	-1.11633	0.461267	3.22696	-12.1097	5.12e-11	3.55e-10	14.8685		AC025165.8		12	57612118	57619638	-1
ENSG00000213445	-1.11607	0.461349	3.67518	-11.5267	1.28e-10	8.04e-10	13.8099	6494	SIPA1	signal-induced proliferation-associated 1 [Source:HGNC Symbol;Acc:HGNC:10885]	11	65638097	65650930	1
ENSG00000074590	-1.11479	0.461758	6.729	-19.4061	5.07e-15	9.03e-14	23.7902	9891	NUAK1	NUAK family kinase 1 [Source:HGNC Symbol;Acc:HGNC:14311]	12	106063340	106140033	-1
ENSG00000154188	-1.11448	0.461857	3.05479	-11.3844	1.61e-10	9.91e-10	13.7254	284	ANGPT1	angiopoietin 1 [Source:HGNC Symbol;Acc:HGNC:484]	8	107249482	107498055	-1
ENSG00000185201	-1.11407	0.46199	3.21426	-12.8621	1.65e-11	1.26e-10	16.0444	10581	IFITM2	interferon induced transmembrane protein 2 [Source:HGNC Symbol;Acc:HGNC:5413]	11	307631	315272	1
ENSG00000128335	-1.11386	0.462057	3.05846	-12.6699	2.19e-11	1.63e-10	15.7869	23780	APOL2	apolipoprotein L2 [Source:HGNC Symbol;Acc:HGNC:619]	22	36226203	36239954	-1
ENSG00000165171	-1.11374	0.462095	0.474608	-6.00598	5.5e-06	1.44e-05	3.6594	155368	WBSCR27	Williams Beuren syndrome chromosome region 27 [Source:HGNC Symbol;Acc:HGNC:19068]	7	73834590	73842535	-1
ENSG00000182463	-1.11142	0.462839	3.86031	-14.4077	1.86e-12	1.78e-11	18.1439	128553	TSHZ2	teashirt zinc finger homeobox 2 [Source:HGNC Symbol;Acc:HGNC:13010]	20	52972407	53495330	1
ENSG00000206527	-1.11119	0.462913	5.92203	-21.87	4.47e-16	1.08e-14	26.3997	201562	HACD2	3-hydroxyacyl-CoA dehydratase 2 [Source:HGNC Symbol;Acc:HGNC:9640]	3	123490820	123585185	-1
ENSG00000224025	-1.1106	0.463102	0.445149	-6.7112	1.13e-06	3.33e-06	5.26424		RP11-274B18.3		9	68609125	68611984	1
ENSG00000200156	-1.11004	0.46328	1.42028	-8.02166	7.13e-08	2.59e-07	7.86301	26832	RNU5B-1	RNA, U5B small nuclear 1 [Source:HGNC Symbol;Acc:HGNC:10212]	15	65304677	65304792	1
ENSG00000160613	-1.10933	0.463509	5.90791	-9.40633	4.92e-09	2.24e-08	9.56256	9159	PCSK7	proprotein convertase subtilisin/kexin type 7 [Source:HGNC Symbol;Acc:HGNC:8748]	11	117204337	117232525	-1
ENSG00000134569	-1.10877	0.46369	5.28942	-22.3038	2.99e-16	7.6e-15	26.9088	4038	LRP4	LDL receptor related protein 4 [Source:HGNC Symbol;Acc:HGNC:6696]	11	46856868	46918642	-1
ENSG00000132669	-1.10858	0.463751	2.98895	-11.3654	1.66e-10	1.02e-09	13.7107	54453	RIN2	Ras and Rab interactor 2 [Source:HGNC Symbol;Acc:HGNC:18750]	20	19886521	20002457	1
ENSG00000183087	-1.10823	0.463864	2.396	-11.1438	2.39e-10	1.41e-09	13.4813	2621	GAS6	growth arrest specific 6 [Source:HGNC Symbol;Acc:HGNC:4168]	13	113820549	113864067	-1
ENSG00000129474	-1.10623	0.464507	5.73689	-18.1702	1.91e-14	2.94e-13	22.5251	84962	AJUBA	ajuba LIM protein [Source:HGNC Symbol;Acc:HGNC:20250]	14	22971174	22982642	-1
ENSG00000267533	-1.10457	0.465042	3.3401	-13.3181	8.48e-12	6.94e-11	16.6992		RP11-815J4.7		18	12067173	12068417	-1
ENSG00000088538	-1.10441	0.465094	2.93222	-12.205	4.42e-11	3.1e-10	15.0901	1795	DOCK3	dedicator of cytokinesis 3 [Source:HGNC Symbol;Acc:HGNC:2989]	3	50675241	51384198	1
ENSG00000151778	-1.10377	0.4653	1.0033	-6.47565	1.91e-06	5.38e-06	4.61273	387923	SERP2	stress-associated endoplasmic reticulum protein family member 2 [Source:HGNC Symbol;Acc:HGNC:20607]	13	44373665	44397714	1
ENSG00000176406	-1.10371	0.465317	1.6782	-7.60315	1.68e-07	5.72e-07	6.92438	9699	RIMS2	regulating synaptic membrane exocytosis 2 [Source:HGNC Symbol;Acc:HGNC:17283]	8	103500748	104256094	1
ENSG00000143458	-1.10327	0.465461	1.78661	-8.97249	1.11e-08	4.68e-08	9.6841	126626	GABPB2	GA binding protein transcription factor beta subunit 2 [Source:HGNC Symbol;Acc:HGNC:28441]	1	151070578	151125542	1
ENSG00000174099	-1.1024	0.465742	4.45349	-16.5649	1.21e-13	1.54e-12	20.8466	253827	MSRB3	methionine sulfoxide reductase B3 [Source:HGNC Symbol;Acc:HGNC:27375]	12	65278643	65488244	1
ENSG00000104823	-1.10177	0.465944	4.88047	-21.4768	6.47e-16	1.48e-14	26.1798	1891	ECH1	enoyl-CoA hydratase 1 [Source:HGNC Symbol;Acc:HGNC:3149]	19	38815422	38832005	-1
ENSG00000072818	-1.10163	0.465988	0.815358	-6.12351	4.21e-06	1.12e-05	3.85346	9744	ACAP1	ArfGAP with coiled-coil, ankyrin repeat and PH domains 1 [Source:HGNC Symbol;Acc:HGNC:16467]	17	7336529	7351478	1
ENSG00000146966	-1.10129	0.466099	4.90265	-20.6433	1.45e-15	2.98e-14	25.3406	27147	DENND2A	DENN domain containing 2A [Source:HGNC Symbol;Acc:HGNC:22212]	7	140518420	140673993	-1
ENSG00000232533	-1.09974	0.466601	1.35191	-7.036	5.59e-07	1.74e-06	5.77845		AC093673.5		7	143379692	143380495	-1
ENSG00000118946	-1.09949	0.466681	2.8343	-10.17	1.25e-09	6.39e-09	11.6717	27253	PCDH17	protocadherin 17 [Source:HGNC Symbol;Acc:HGNC:14267]	13	57631810	57729311	1
ENSG00000183010	-1.09904	0.466827	5.08752	-20.4887	1.69e-15	3.44e-14	25.1486	5831	PYCR1	pyrroline-5-carboxylate reductase 1 [Source:HGNC Symbol;Acc:HGNC:9721]	17	81932384	81942412	-1
ENSG00000177337	-1.09689	0.467522	0.63021	-5.67937	1.17e-05	2.9e-05	2.8653		DLGAP1-AS1	DLGAP1 antisense RNA 1 [Source:HGNC Symbol;Acc:HGNC:31676]	18	3593732	3598352	1
ENSG00000154721	-1.09573	0.4679	2.86331	-8.43453	3.13e-08	1.21e-07	8.34368	58494	JAM2	junctional adhesion molecule 2 [Source:HGNC Symbol;Acc:HGNC:14686]	21	25639272	25717562	1
ENSG00000160326	-1.0949	0.468168	4.65163	-22.3998	2.74e-16	7.02e-15	27.1109	11182	SLC2A6	solute carrier family 2 member 6 [Source:HGNC Symbol;Acc:HGNC:11011]	9	133471095	133479137	-1
ENSG00000278715	-1.09476	0.468213	2.42985	-9.57719	3.59e-09	1.68e-08	10.6826		SNORD116-20	small nucleolar RNA, C/D box 116-20 [Source:HGNC Symbol;Acc:HGNC:33086]	15	25087662	25087753	1
ENSG00000113657	-1.09476	0.468214	7.61686	-30.8042	3.77e-19	2.33e-17	33.6082	1809	DPYSL3	dihydropyrimidinase like 3 [Source:HGNC Symbol;Acc:HGNC:3015]	5	147390811	147510056	-1
ENSG00000115423	-1.09475	0.468217	2.17034	-8.45908	2.98e-08	1.16e-07	8.57281	1768	DNAH6	dynein axonemal heavy chain 6 [Source:HGNC Symbol;Acc:HGNC:2951]	2	84516455	84819589	1
ENSG00000115266	-1.09256	0.46893	2.26671	-8.77486	1.61e-08	6.61e-08	9.17889	10297	APC2	APC2, WNT signaling pathway regulator [Source:HGNC Symbol;Acc:HGNC:24036]	19	1446302	1473244	1
ENSG00000072274	-1.09174	0.469194	8.1539	-29.0358	1.29e-18	6.7e-17	32.3056	7037	TFRC	transferrin receptor [Source:HGNC Symbol;Acc:HGNC:11763]	3	196027183	196082189	-1
ENSG00000135723	-1.09168	0.469213	4.57866	-13.3746	7.82e-12	6.46e-11	16.4931	29109	FHOD1	formin homology 2 domain containing 1 [Source:HGNC Symbol;Acc:HGNC:17905]	16	67229387	67247658	-1
ENSG00000163491	-1.09051	0.469595	1.05833	-7.55554	1.86e-07	6.27e-07	6.96825	152110	NEK10	NIMA related kinase 10 [Source:HGNC Symbol;Acc:HGNC:18592]	3	27110085	27369460	-1
ENSG00000268543	-1.09004	0.46975	1.30204	-8.1974	5.01e-08	1.87e-07	8.25046		CTD-2619J13.16		19	58418560	58419310	1
ENSG00000112964	-1.08963	0.469882	0.123785	-5.68136	1.16e-05	2.89e-05	2.98002	2690	GHR	growth hormone receptor [Source:HGNC Symbol;Acc:HGNC:4263]	5	42423777	42721878	1
ENSG00000124006	-1.08866	0.470197	5.46207	-22.008	3.93e-16	9.66e-15	26.5972	23363	OBSL1	obscurin like 1 [Source:HGNC Symbol;Acc:HGNC:29092]	2	219550729	219571859	-1
ENSG00000123104	-1.08667	0.470847	6.6145	-16.3293	1.6e-13	1.97e-12	20.2068	3709	ITPR2	inositol 1,4,5-trisphosphate receptor type 2 [Source:HGNC Symbol;Acc:HGNC:6181]	12	26336515	26833198	-1
ENSG00000240370	-1.08585	0.471114	1.74224	-8.14562	5.56e-08	2.06e-07	8.04072		U47924.6		12	6873389	6884741	1
ENSG00000275538	-1.08508	0.471365	1.99945	-8.4404	3.09e-08	1.2e-07	8.57717	101954277	RNVU1-19	RNA, variant U1 small nuclear 19 [Source:HGNC Symbol;Acc:HGNC:48324]	1	120850819	120850985	-1
ENSG00000196381	-1.08231	0.472271	0.725822	-5.90498	6.93e-06	1.79e-05	3.36915	163115	ZNF781	zinc finger protein 781 [Source:HGNC Symbol;Acc:HGNC:26745]	19	37667751	37692322	-1
ENSG00000154864	-1.08212	0.472334	5.42198	-21.6566	5.46e-16	1.28e-14	26.2621	63895	PIEZO2	piezo type mechanosensitive ion channel component 2 [Source:HGNC Symbol;Acc:HGNC:26270]	18	10666483	11148762	-1
ENSG00000130635	-1.08184	0.472427	3.11839	-10.3021	9.9e-10	5.17e-09	11.8363	1289	COL5A1	collagen type V alpha 1 chain [Source:HGNC Symbol;Acc:HGNC:2209]	9	134641774	134844843	1
ENSG00000176531	-1.08054	0.472851	1.78094	-8.91667	1.23e-08	5.14e-08	9.57597	653583	PHLDB3	pleckstrin homology like domain family B member 3 [Source:HGNC Symbol;Acc:HGNC:30499]	19	43474954	43504935	-1
ENSG00000240787	-1.08005	0.473012	0.323562	-5.5619	1.53e-05	3.74e-05	2.65807		RP11-615J4.4		3	111570638	111571054	-1
ENSG00000260230	-1.07919	0.473295	1.56782	-8.46781	2.93e-08	1.14e-07	8.73688	23732	FRRS1L	ferric chelate reductase 1 like [Source:HGNC Symbol;Acc:HGNC:1362]	9	109130293	109167291	-1
ENSG00000127220	-1.07879	0.473427	1.90091	-8.26653	4.36e-08	1.65e-07	8.24992	79575	ABHD8	abhydrolase domain containing 8 [Source:HGNC Symbol;Acc:HGNC:23759]	19	17292131	17310236	-1
ENSG00000167703	-1.07742	0.473876	2.18043	-10.3003	9.93e-10	5.19e-09	12.065	124935	SLC43A2	solute carrier family 43 member 2 [Source:HGNC Symbol;Acc:HGNC:23087]	17	1569267	1628886	-1
ENSG00000198711	-1.07694	0.474035	0.46207	-5.90809	6.88e-06	1.77e-05	3.43478	619518	SSBP3-AS1	SSBP3 antisense RNA 1 [Source:HGNC Symbol;Acc:HGNC:32328]	1	54236440	54239063	1
ENSG00000210741	-1.07557	0.474483	0.159036	-4.86106	8.03e-05	0.000175092	1.03214	406972	MIR196A1	microRNA 196a-1 [Source:HGNC Symbol;Acc:HGNC:31567]	17	48632490	48632559	-1
ENSG00000179029	-1.07441	0.474865	4.86112	-17.0798	6.57e-14	8.81e-13	21.3916	84314	TMEM107	transmembrane protein 107 [Source:HGNC Symbol;Acc:HGNC:28128]	17	8173237	8176399	-1
ENSG00000129757	-1.07351	0.475161	3.43072	-8.24695	4.54e-08	1.71e-07	7.81068	1028	CDKN1C	cyclin dependent kinase inhibitor 1C [Source:HGNC Symbol;Acc:HGNC:1786]	11	2883213	2885881	-1
ENSG00000125510	-1.07325	0.475247	0.393008	-5.7148	1.07e-05	2.69e-05	2.99964	4987	OPRL1	opioid related nociceptin receptor 1 [Source:HGNC Symbol;Acc:HGNC:8155]	20	64080173	64100643	1
ENSG00000160972	-1.07273	0.475419	4.01316	-15.5755	4.07e-13	4.48e-12	19.6827	84988	PPP1R16A	protein phosphatase 1 regulatory subunit 16A [Source:HGNC Symbol;Acc:HGNC:14941]	8	144477969	144502121	1
ENSG00000143995	-1.07269	0.475433	2.24812	-9.47489	4.33e-09	1.99e-08	10.534	4211	MEIS1	Meis homeobox 1 [Source:HGNC Symbol;Acc:HGNC:7000]	2	66433452	66573869	1
ENSG00000259326	-1.07196	0.475672	0.25373	-5.18897	3.68e-05	8.45e-05	1.79181		RP11-102L12.2		15	38502853	38504981	1
ENSG00000131711	-1.07165	0.475775	8.07291	-32.2631	1.44e-19	9.8e-18	34.5879	4131	MAP1B	microtubule associated protein 1B [Source:HGNC Symbol;Acc:HGNC:6836]	5	72107234	72209570	1
ENSG00000183386	-1.0702	0.476252	3.41932	-14.9777	8.76e-13	8.98e-12	19.0235	2275	FHL3	four and a half LIM domains 3 [Source:HGNC Symbol;Acc:HGNC:3704]	1	37996770	38005606	-1
ENSG00000266036	-1.06856	0.476794	1.31803	-5.12026	4.33e-05	9.84e-05	1.37187		RP11-452I5.2		17	74747319	74748912	-1
ENSG00000225953	-1.068	0.47698	0.93127	-7.05121	5.41e-07	1.69e-06	5.90827	150538	SATB2-AS1	SATB2 antisense RNA 1 [Source:HGNC Symbol;Acc:HGNC:26490]	2	199457700	199476935	1
ENSG00000213859	-1.06791	0.477008	2.30589	-11.0212	2.92e-10	1.7e-09	13.292	147040	KCTD11	potassium channel tetramerization domain containing 11 [Source:HGNC Symbol;Acc:HGNC:21302]	17	7351889	7354944	1
ENSG00000173947	-1.06784	0.477032	0.484884	-4.16653	0.000425545	0.000828093	-0.703371	128344	PIFO	primary cilia formation [Source:HGNC Symbol;Acc:HGNC:27009]	1	111346288	111353013	1
ENSG00000172828	-1.06674	0.477396	0.0775971	-5.30335	2.81e-05	6.57e-05	2.1002	23491	CES3	carboxylesterase 3 [Source:HGNC Symbol;Acc:HGNC:1865]	16	66961237	66975148	1
ENSG00000143375	-1.06655	0.47746	3.95672	-13.2483	9.37e-12	7.59e-11	16.4469	57530	CGN	cingulin [Source:HGNC Symbol;Acc:HGNC:17429]	1	151510510	151538692	1
ENSG00000225951	-1.06635	0.477526	3.63653	-14.1181	2.76e-12	2.54e-11	17.7867		ODF2-AS1	ODF2 antisense RNA 1 [Source:HGNC Symbol;Acc:HGNC:49461]	9	128468957	128473012	-1
ENSG00000173535	-1.06539	0.477845	0.672479	-4.88128	7.65e-05	0.000167417	0.961764	8794	TNFRSF10C	TNF receptor superfamily member 10c [Source:HGNC Symbol;Acc:HGNC:11906]	8	23084355	23117437	1
ENSG00000214447	-1.06486	0.478019	2.19245	-8.96958	1.11e-08	4.7e-08	9.57794	388389	FAM187A	family with sequence similarity 187 member A [Source:HGNC Symbol;Acc:HGNC:35153]	17	44899712	44905390	1
ENSG00000084444	-1.06411	0.478269	4.00951	-15.9775	2.46e-13	2.89e-12	20.202	57613	FAM234B	family with sequence similarity 234 member B [Source:HGNC Symbol;Acc:HGNC:29288]	12	13044284	13142521	1
ENSG00000180998	-1.06063	0.479424	2.74377	-11.6675	1.02e-10	6.57e-10	14.2665	283554	GPR137C	G protein-coupled receptor 137C [Source:HGNC Symbol;Acc:HGNC:25445]	14	52553148	52637713	1
ENSG00000068615	-1.05901	0.479961	1.23601	-7.68462	1.42e-07	4.89e-07	7.19973	65055	REEP1	receptor accessory protein 1 [Source:HGNC Symbol;Acc:HGNC:25786]	2	86213993	86338083	-1
ENSG00000272033	-1.05846	0.480145	0.777823	-7.56153	1.83e-07	6.2e-07	7.04031		RP11-52A20.2		1	167379108	167381000	1
ENSG00000153721	-1.05835	0.480182	4.58878	-18.5856	1.21e-14	1.96e-13	23.1986	154043	CNKSR3	CNKSR family member 3 [Source:HGNC Symbol;Acc:HGNC:23034]	6	154387504	154510659	-1
ENSG00000153832	-1.05823	0.480221	1.50814	-6.83563	8.62e-07	2.6e-06	5.29527	130888	FBXO36	F-box protein 36 [Source:HGNC Symbol;Acc:HGNC:27020]	2	229922302	230013109	1
ENSG00000266933	-1.05693	0.480653	0.53898	-5.10741	4.47e-05	0.000101287	1.53362		AC005775.2		19	490046	507833	-1
ENSG00000245213	-1.05654	0.480784	0.862919	-6.65989	1.27e-06	3.69e-06	5.05657	101930370	RP11-10K16.1		4	173131928	173169652	-1
ENSG00000248774	-1.05631	0.480859	2.99072	-11.8763	7.37e-11	4.9e-10	14.5466		RP11-798M19.3		4	173322206	173329694	-1
ENSG00000274020	-1.0538	0.481698	1.96643	-8.85195	1.39e-08	5.76e-08	9.40248		LINC01138	long intergenic non-protein coding RNA 1138 [Source:HGNC Symbol;Acc:HGNC:49454]	1	148362995	148460150	-1
ENSG00000136811	-1.05346	0.481811	6.89299	-28.6322	1.73e-18	8.54e-17	32.0709	4957	ODF2	outer dense fiber of sperm tails 2 [Source:HGNC Symbol;Acc:HGNC:8114]	9	128455186	128501292	1
ENSG00000263528	-1.0531	0.481933	3.65989	-11.7867	8.48e-11	5.55e-10	14.2374	9641	IKBKE	inhibitor of kappa light polypeptide gene enhancer in B-cells, kinase epsilon [Source:HGNC Symbol;Acc:HGNC:14552]	1	206470476	206496889	1
ENSG00000006453	-1.05273	0.482057	2.69953	-11.1921	2.21e-10	1.32e-09	13.4865	55971	BAIAP2L1	BAI1 associated protein 2 like 1 [Source:HGNC Symbol;Acc:HGNC:21649]	7	98291651	98401068	-1
ENSG00000132879	-1.05202	0.482291	2.10619	-8.40624	3.31e-08	1.28e-07	8.48038	93611	FBXO44	F-box protein 44 [Source:HGNC Symbol;Acc:HGNC:24847]	1	11654375	11663327	1
ENSG00000185633	-1.05162	0.482425	0.116338	-5.45524	1.97e-05	4.71e-05	2.44962	56901	NDUFA4L2	NDUFA4, mitochondrial complex associated like 2 [Source:HGNC Symbol;Acc:HGNC:29836]	12	57234903	57240715	-1
ENSG00000267284	-1.0512	0.482568	0.758159	-5.69248	1.13e-05	2.82e-05	2.86413		RP11-397A16.1		18	55721063	55788761	1
ENSG00000128271	-1.05107	0.482609	1.49724	-9.22061	6.94e-09	3.06e-08	10.2259	135	ADORA2A	adenosine A2a receptor [Source:HGNC Symbol;Acc:HGNC:263]	22	24417879	24442360	1
ENSG00000130522	-1.05059	0.482769	4.94057	-18.9408	8.27e-15	1.39e-13	23.5247	3727	JUND	JunD proto-oncogene, AP-1 transcription factor subunit [Source:HGNC Symbol;Acc:HGNC:6206]	19	18279760	18281622	-1
ENSG00000250451	-1.05015	0.482919	0.999734	-6.62169	1.38e-06	4e-06	4.93965	100874363	HOXC-AS1	HOXC cluster antisense RNA 1 [Source:HGNC Symbol;Acc:HGNC:43749]	12	53999022	54000010	-1
ENSG00000179869	-1.05006	0.482949	0.870636	-5.36658	2.42e-05	5.73e-05	2.06858	154664	ABCA13	ATP binding cassette subfamily A member 13 [Source:HGNC Symbol;Acc:HGNC:14638]	7	48171458	48647496	1
ENSG00000171551	-1.04994	0.48299	4.91604	-7.25101	3.53e-07	1.14e-06	5.33074	9427	ECEL1	endothelin converting enzyme like 1 [Source:HGNC Symbol;Acc:HGNC:3147]	2	232479827	232487828	-1
ENSG00000248405	-1.04867	0.483414	0.511157	-5.34009	2.58e-05	6.07e-05	2.0915	553158	PRR5-ARHGAP8	PRR5-ARHGAP8 readthrough [Source:HGNC Symbol;Acc:HGNC:34512]	22	44702233	44862706	1
ENSG00000263585	-1.04781	0.483703	3.74626	-14.4282	1.81e-12	1.74e-11	18.1953		RP11-498C9.13		17	81932398	81933058	1
ENSG00000125520	-1.04768	0.483746	4.43911	-13.9563	3.45e-12	3.09e-11	17.3701	56731	SLC2A4RG	SLC2A4 regulator [Source:HGNC Symbol;Acc:HGNC:15930]	20	63739861	63743505	1
ENSG00000258610	-1.04741	0.483835	3.91555	-15.6236	3.83e-13	4.26e-12	19.7655		RP11-488C13.7		14	76778952	76782249	1
ENSG00000108797	-1.04634	0.484195	4.1716	-17.9486	2.44e-14	3.66e-13	22.5599	8506	CNTNAP1	contactin associated protein 1 [Source:HGNC Symbol;Acc:HGNC:8011]	17	42682613	42699814	1
ENSG00000111859	-1.04517	0.484589	5.01836	-15.3221	5.62e-13	5.99e-12	19.1313	4739	NEDD9	neural precursor cell expressed, developmentally down-regulated 9 [Source:HGNC Symbol;Acc:HGNC:7733]	6	11183298	11382348	-1
ENSG00000258700	-1.04466	0.484758	-0.249646	-5.33855	2.59e-05	6.09e-05	2.24979	100506412	LINC00871	long intergenic non-protein coding RNA 871 [Source:HGNC Symbol;Acc:HGNC:47038]	14	45940943	46501823	1
ENSG00000272657	-1.04443	0.484835	3.73949	-14.8976	9.73e-13	9.85e-12	18.8411		AP000320.7		21	34073592	34360033	1
ENSG00000074181	-1.04371	0.48508	5.1582	-16.1623	1.96e-13	2.34e-12	20.1957	4854	NOTCH3	notch 3 [Source:HGNC Symbol;Acc:HGNC:7883]	19	15159038	15200981	-1
ENSG00000164683	-1.04324	0.485237	1.4893	-6.43882	2.07e-06	5.81e-06	4.40608	23462	HEY1	hes related family bHLH transcription factor with YRPW motif 1 [Source:HGNC Symbol;Acc:HGNC:4880]	8	79764010	79767863	-1
ENSG00000144589	-1.04252	0.48548	4.54822	-18.3609	1.55e-14	2.42e-13	22.9533	114790	STK11IP	serine/threonine kinase 11 interacting protein [Source:HGNC Symbol;Acc:HGNC:19184]	2	219597860	219616451	1
ENSG00000135740	-1.04138	0.485861	2.63877	-10.0054	1.67e-09	8.34e-09	11.4178	6553	SLC9A5	solute carrier family 9 member A5 [Source:HGNC Symbol;Acc:HGNC:11078]	16	67237683	67272190	1
ENSG00000164211	-1.0408	0.486058	7.5276	-22.6453	2.19e-16	5.77e-15	27.0021	134429	STARD4	StAR related lipid transfer domain containing 4 [Source:HGNC Symbol;Acc:HGNC:18058]	5	111496033	111512590	-1
ENSG00000143674	-1.0389	0.486699	0.797626	-5.49351	1.8e-05	4.34e-05	2.386	84451	RP5-862P8.2	Mitogen-activated protein kinase kinase kinase MLK4 [Source:UniProtKB/Swiss-Prot;Acc:Q5TCX8]	1	233327768	233385148	1
ENSG00000164897	-1.03851	0.486829	3.85337	-11.071	2.69e-10	1.58e-09	12.9944	83590	TMUB1	transmembrane and ubiquitin like domain containing 1 [Source:HGNC Symbol;Acc:HGNC:21709]	7	151081080	151083546	-1
ENSG00000275832	-1.03832	0.486894	2.45491	-9.16047	7.76e-09	3.39e-08	9.88012	57636	ARHGAP23	Rho GTPase activating protein 23 [Source:HGNC Symbol;Acc:HGNC:29293]	17	38419280	38512392	1
ENSG00000142949	-1.03807	0.486977	6.69518	-22.8289	1.86e-16	4.99e-15	27.2297	5792	PTPRF	protein tyrosine phosphatase, receptor type F [Source:HGNC Symbol;Acc:HGNC:9670]	1	43525187	43623666	1
ENSG00000128203	-1.03783	0.487059	1.23261	-7.31972	3.05e-07	9.93e-07	6.42117	57168	ASPHD2	aspartate beta-hydroxylase domain containing 2 [Source:HGNC Symbol;Acc:HGNC:30437]	22	26429273	26445015	1
ENSG00000233382	-1.03762	0.487131	0.0250529	-6.06128	4.85e-06	1.28e-05	3.87691	158801	NKAPP1	NFKB activating protein pseudogene 1 [Source:HGNC Symbol;Acc:HGNC:26706]	X	120120953	120245267	-1
ENSG00000255182	-1.0348	0.488083	3.43986	-13.608	5.61e-12	4.79e-11	17.098		CTD-2517M22.14		8	144495458	144505444	-1
ENSG00000102096	-1.0345	0.488184	3.40243	-14.217	2.41e-12	2.24e-11	17.9783	11040	PIM2	Pim-2 proto-oncogene, serine/threonine kinase [Source:HGNC Symbol;Acc:HGNC:8987]	X	48913182	48919024	-1
ENSG00000276116	-1.03358	0.488498	0.190638	-5.6184	1.34e-05	3.31e-05	2.81603		FUT8-AS1	FUT8 antisense RNA 1 [Source:HGNC Symbol;Acc:HGNC:44294]	14	65411170	65412690	-1
ENSG00000068971	-1.0334	0.488556	2.72917	-12.0275	5.82e-11	3.98e-10	14.8513	5526	PPP2R5B	protein phosphatase 2 regulatory subunit B'beta [Source:HGNC Symbol;Acc:HGNC:9310]	11	64917553	64934473	1
ENSG00000071246	-1.03304	0.48868	6.32672	-22.4882	2.53e-16	6.53e-15	26.9429	22846	VASH1	vasohibin 1 [Source:HGNC Symbol;Acc:HGNC:19964]	14	76762189	76783015	1
ENSG00000268614	-1.03236	0.48891	1.64314	-7.90094	9.11e-08	3.25e-07	7.55538		CTD-2207O23.10		19	7533595	7540059	1
ENSG00000085831	-1.03172	0.489127	0.0733333	-5.67685	1.17e-05	2.92e-05	2.97765	22996	TTC39A	tetratricopeptide repeat domain 39A [Source:HGNC Symbol;Acc:HGNC:18657]	1	51287258	51345116	-1
ENSG00000085563	-1.03125	0.489285	2.80389	-7.84147	1.03e-07	3.63e-07	7.13038	5243	ABCB1	ATP binding cassette subfamily B member 1 [Source:HGNC Symbol;Acc:HGNC:40]	7	87503633	87713323	-1
ENSG00000265907	-1.03113	0.489325	1.95215	-9.30766	5.9e-09	2.64e-08	10.2863		RP11-737O24.2		18	2948238	2960756	1
ENSG00000136371	-1.03094	0.489392	2.58529	-10.8803	3.7e-10	2.1e-09	12.9812	10588	MTHFS	5,10-methenyltetrahydrofolate synthetase (5-formyltetrahydrofolate cyclo-ligase) [Source:HGNC Symbol;Acc:HGNC:7437]	15	79833585	79897379	-1
ENSG00000178150	-1.03091	0.489402	3.26856	-12.4619	2.99e-11	2.17e-10	15.4091	163071	ZNF114	zinc finger protein 114 [Source:HGNC Symbol;Acc:HGNC:12894]	19	48172318	48287608	1
ENSG00000102053	-1.03067	0.489482	2.9186	-11.9513	6.55e-11	4.42e-10	14.6831	340554	ZC3H12B	zinc finger CCCH-type containing 12B [Source:HGNC Symbol;Acc:HGNC:17407]	X	65366638	65507887	1
ENSG00000130830	-1.02994	0.489731	0.631035	-4.45114	0.00021452	0.000437173	-0.0592179	4354	MPP1	membrane palmitoylated protein 1 [Source:HGNC Symbol;Acc:HGNC:7219]	X	154778684	154821007	-1
ENSG00000172819	-1.02942	0.489905	4.30501	-16.3145	1.63e-13	2e-12	20.5619	5916	RARG	retinoic acid receptor gamma [Source:HGNC Symbol;Acc:HGNC:9866]	12	53210567	53232980	-1
ENSG00000181744	-1.0292	0.489983	5.33998	-23.3108	1.21e-16	3.43e-15	27.8347	205428	C3orf58	chromosome 3 open reading frame 58 [Source:HGNC Symbol;Acc:HGNC:28490]	3	143971798	144048719	1
ENSG00000272625	-1.02664	0.490852	0.647667	-6.13883	4.07e-06	1.09e-05	3.92353		RP11-737O24.5		18	2920966	2921685	1
ENSG00000182742	-1.02643	0.490924	3.35149	-11.9232	6.85e-11	4.59e-10	14.5332	3214	HOXB4	homeobox B4 [Source:HGNC Symbol;Acc:HGNC:5115]	17	48575513	48580111	-1
ENSG00000225302	-1.02606	0.49105	0.862634	-6.22429	3.35e-06	9.09e-06	4.06953		RP11-539I5.1		10	116828761	116850205	-1
ENSG00000150764	-1.02476	0.491493	5.52961	-20.4605	1.74e-15	3.51e-14	25.0421	85458	DIXDC1	DIX domain containing 1 [Source:HGNC Symbol;Acc:HGNC:23695]	11	111927144	112022584	1
ENSG00000069966	-1.02433	0.491639	3.30017	-11.7131	9.53e-11	6.15e-10	14.2041	10681	GNB5	G protein subunit beta 5 [Source:HGNC Symbol;Acc:HGNC:4401]	15	52115105	52191369	-1
ENSG00000135424	-1.02345	0.49194	3.83705	-12.1278	4.98e-11	3.46e-10	14.7426	3679	ITGA7	integrin subunit alpha 7 [Source:HGNC Symbol;Acc:HGNC:6143]	12	55684568	55716043	-1
ENSG00000196141	-1.02328	0.491997	4.25047	-11.1283	2.45e-10	1.45e-09	12.9938	26010	SPATS2L	spermatogenesis associated serine rich 2 like [Source:HGNC Symbol;Acc:HGNC:24574]	2	200305881	200482263	1
ENSG00000165124	-1.02235	0.492314	2.38282	-9.49446	4.18e-09	1.93e-08	10.5337	79987	SVEP1	sushi, von Willebrand factor type A, EGF and pentraxin domain containing 1 [Source:HGNC Symbol;Acc:HGNC:15985]	9	110365251	110579880	-1
ENSG00000231093	-1.02086	0.492824	1.08832	-6.02398	5.28e-06	1.39e-05	3.55464		RP13-150K15.1		X	145630218	145632375	1
ENSG00000088305	-1.02006	0.493095	5.84474	-21.5415	6.08e-16	1.4e-14	26.0853	1789	DNMT3B	DNA methyltransferase 3 beta [Source:HGNC Symbol;Acc:HGNC:2979]	20	32762385	32809356	1
ENSG00000277785	-1.01419	0.495106	3.09062	-10.4928	7.12e-10	3.82e-09	12.1781		SNORD116-21	small nucleolar RNA, C/D box 116-21 [Source:HGNC Symbol;Acc:HGNC:33087]	15	25088804	25088895	1
ENSG00000178718	-1.0134	0.495377	2.77009	-9.65804	3.1e-09	1.46e-08	10.7415	54913	RPP25	ribonuclease P/MRP subunit p25 [Source:HGNC Symbol;Acc:HGNC:30361]	15	74954416	74957464	-1
ENSG00000177300	-1.01281	0.49558	1.28461	-6.7832	9.67e-07	2.88e-06	5.23028	53842	CLDN22	claudin 22 [Source:HGNC Symbol;Acc:HGNC:2044]	4	183318194	183320774	-1
ENSG00000241570	-1.01208	0.495829	1.23519	-7.44952	2.32e-07	7.71e-07	6.69861	101927832	PAQR9-AS1	PAQR9 antisense RNA 1 [Source:HGNC Symbol;Acc:HGNC:50861]	3	142960650	143001559	1
ENSG00000162643	-1.01141	0.496062	0.234482	-4.94138	6.63e-05	0.000146479	1.20462	126820	WDR63	WD repeat domain 63 [Source:HGNC Symbol;Acc:HGNC:30711]	1	84999147	85133138	1
ENSG00000127990	-1.01128	0.496106	4.69162	-18.5333	1.28e-14	2.06e-13	23.1167	8910	SGCE	sarcoglycan epsilon [Source:HGNC Symbol;Acc:HGNC:10808]	7	94585230	94656209	-1
ENSG00000164930	-1.01013	0.496501	4.1932	-13.6134	5.57e-12	4.76e-11	16.9272	8323	FZD6	frizzled class receptor 6 [Source:HGNC Symbol;Acc:HGNC:4044]	8	103298433	103332866	1
ENSG00000112655	-1.00987	0.49659	6.67397	-23.8554	7.53e-17	2.24e-15	28.1689	5754	PTK7	protein tyrosine kinase 7 (inactive) [Source:HGNC Symbol;Acc:HGNC:9618]	6	43076268	43161719	1
ENSG00000274290	-1.00926	0.496801	7.24408	-20.8039	1.24e-15	2.59e-14	25.2176	8344	HIST1H2BE	histone cluster 1, H2be [Source:HGNC Symbol;Acc:HGNC:4753]	6	26172059	26184655	1
ENSG00000070182	-1.00862	0.497022	3.56405	-11.9029	7.07e-11	4.72e-10	14.4471	6710 102465841	SPTB	spectrin beta, erythrocytic [Source:HGNC Symbol;Acc:HGNC:11274]	14	64746283	64879883	-1
ENSG00000239569	-1.00722	0.497502	2.39023	-9.82013	2.32e-09	1.12e-08	11.1385		KMT2E-AS1	KMT2E antisense RNA 1 (head to head) [Source:HGNC Symbol;Acc:HGNC:40845]	7	105013425	105014321	-1
ENSG00000070371	-1.00645	0.49777	3.65373	-13.2096	9.91e-12	7.98e-11	16.4574	8218	CLTCL1	clathrin heavy chain like 1 [Source:HGNC Symbol;Acc:HGNC:2093]	22	19179473	19291716	-1
ENSG00000277159	-1.00577	0.498003	0.131805	-4.6669	0.000127767	0.000269883	0.572434		RP11-88E10.4		13	112602828	112606417	-1
ENSG00000167549	-1.00563	0.498054	0.324128	-5.34643	2.54e-05	5.98e-05	2.1466	84940	CORO6	coronin 6 [Source:HGNC Symbol;Acc:HGNC:21356]	17	29614756	29622907	-1
ENSG00000265678	-1.00472	0.498368	1.08955	-6.62286	1.38e-06	3.99e-06	4.91951		RP11-1376P16.2		17	82153430	82154815	1
ENSG00000243927	-1.00413	0.498572	5.58762	-19.9264	2.97e-15	5.54e-14	24.4752	64968	MRPS6	mitochondrial ribosomal protein S6 [Source:HGNC Symbol;Acc:HGNC:14051]	21	34073224	34143034	1
ENSG00000116745	-1.00411	0.498578	1.21404	-6.99512	6.1e-07	1.89e-06	5.71683	6121	RPE65	RPE65, retinoid isomerohydrolase [Source:HGNC Symbol;Acc:HGNC:10294]	1	68428822	68449959	-1
ENSG00000225548	-1.00388	0.498658	0.662762	-5.66891	1.2e-05	2.97e-05	2.82804		AC098973.2		3	27802762	27891301	1
ENSG00000175040	-1.00376	0.498698	3.50922	-9.83752	2.25e-09	1.09e-08	10.8855	9435	CHST2	carbohydrate sulfotransferase 2 [Source:HGNC Symbol;Acc:HGNC:1970]	3	143119331	143124014	1
ENSG00000162888	-1.00303	0.49895	0.253612	-5.10578	4.48e-05	0.000101607	1.59112		C1orf147	chromosome 1 open reading frame 147 [Source:HGNC Symbol;Acc:HGNC:32061]	1	206491116	206497728	-1
ENSG00000149150	-1.00296	0.498977	0.916605	-6.70427	1.15e-06	3.38e-06	5.14164	8501	SLC43A1	solute carrier family 43 member 1 [Source:HGNC Symbol;Acc:HGNC:9225]	11	57484534	57515786	-1
ENSG00000261069	-1.00216	0.499252	5.57511	-18.8603	9.01e-15	1.5e-13	23.3232		RP11-701H24.4		15	25087661	25088896	1
ENSG00000128228	-1.00029	0.4999	2.85001	-9.36002	5.35e-09	2.42e-08	10.1582	23753	SDF2L1	stromal cell derived factor 2 like 1 [Source:HGNC Symbol;Acc:HGNC:10676]	22	21642261	21644298	1
ENSG00000175662	1.00173	2.0024	4.04685	15.13	7.19e-13	7.48e-12	19.0348	146691	TOM1L2	target of myb1 like 2 membrane trafficking protein [Source:HGNC Symbol;Acc:HGNC:11984]	17	17843511	17972422	-1
ENSG00000131019	1.00183	2.00254	2.82159	12.7734	1.88e-11	1.42e-10	15.9464	79465	ULBP3	UL16 binding protein 3 [Source:HGNC Symbol;Acc:HGNC:14895]	6	150063150	150069095	-1
ENSG00000197702	1.00239	2.00331	5.07437	13.1632	1.06e-11	8.49e-11	16.0272	55742	PARVA	parvin alpha [Source:HGNC Symbol;Acc:HGNC:14652]	11	12377185	12530801	1
ENSG00000076258	1.00312	2.00433	0.95402	5.33894	2.58e-05	6.08e-05	1.93061	2329	FMO4	flavin containing monooxygenase 4 [Source:HGNC Symbol;Acc:HGNC:3772]	1	171314208	171342084	1
ENSG00000121236	1.00384	2.00533	4.89418	17.5865	3.67e-14	5.22e-13	21.9459	117854	TRIM6	tripartite motif containing 6 [Source:HGNC Symbol;Acc:HGNC:16277]	11	5596109	5612958	1
ENSG00000126217	1.00458	2.00635	5.47566	22.4744	2.56e-16	6.61e-15	27.0052	23263	MCF2L	MCF.2 cell line derived transforming sequence like [Source:HGNC Symbol;Acc:HGNC:14576]	13	112894378	113099739	1
ENSG00000141527	1.00458	2.00636	1.43765	6.79332	9.46e-07	2.83e-06	5.164	79092	CARD14	caspase recruitment domain family member 14 [Source:HGNC Symbol;Acc:HGNC:16446]	17	80169992	80209331	1
ENSG00000172167	1.00466	2.00647	5.17075	18.5062	1.32e-14	2.11e-13	22.9578	27085	MTBP	MDM2 binding protein [Source:HGNC Symbol;Acc:HGNC:7417]	8	120445400	120542133	1
ENSG00000183826	1.00472	2.00655	4.66762	20.9168	1.11e-15	2.38e-14	25.6175	114781	BTBD9	BTB domain containing 9 [Source:HGNC Symbol;Acc:HGNC:21228]	6	38168451	38640148	-1
ENSG00000272762	1.00672	2.00934	3.53843	12.3289	3.66e-11	2.6e-10	15.0832		RP11-155D18.12		3	51961212	51974031	-1
ENSG00000173926	1.00699	2.00972	1.68697	8.00693	7.35e-08	2.66e-07	7.71303	115123	2003-03-01	membrane associated ring-CH-type finger 3 [Source:HGNC Symbol;Acc:HGNC:28728]	5	126867714	127030808	-1
ENSG00000266728	1.00831	2.01155	0.343894	5.47419	1.88e-05	4.53e-05	2.3983		AC015688.3		17	27623364	27640777	1
ENSG00000073849	1.0092	2.0128	5.81343	22.4195	2.69e-16	6.93e-15	26.9097	6480	ST6GAL1	ST6 beta-galactoside alpha-2,6-sialyltransferase 1 [Source:HGNC Symbol;Acc:HGNC:10860]	3	186930485	187078553	1
ENSG00000162068	1.01056	2.0147	0.141766	4.99759	5.8e-05	0.000129219	1.31424	4917	NTN3	netrin 3 [Source:HGNC Symbol;Acc:HGNC:8030]	16	2471499	2474145	1
ENSG00000144668	1.01285	2.01789	6.27643	20.26	2.12e-15	4.15e-14	24.7158	3680	ITGA9	integrin subunit alpha 9 [Source:HGNC Symbol;Acc:HGNC:6145]	3	37452115	37823514	1
ENSG00000253553	1.01321	2.0184	3.00064	11.9355	6.72e-11	4.51e-10	14.587		RP11-586K2.1		8	88326836	88737134	1
ENSG00000110076	1.01367	2.01904	0.681655	5.84438	7.97e-06	2.03e-05	3.18671	9379	NRXN2	neurexin 2 [Source:HGNC Symbol;Acc:HGNC:8009]	11	64606174	64723188	-1
ENSG00000137831	1.01576	2.02197	6.00422	16.4878	1.32e-13	1.67e-12	20.4442	55075	UACA	uveal autoantigen with coiled-coil domains and ankyrin repeats [Source:HGNC Symbol;Acc:HGNC:15947]	15	70654554	70763593	-1
ENSG00000136048	1.01677	2.02339	2.98976	10.9576	3.25e-10	1.87e-09	12.9618	55332	DRAM1	DNA damage regulated autophagy modulator 1 [Source:HGNC Symbol;Acc:HGNC:25645]	12	101877351	102012130	1
ENSG00000214960	1.0168	2.02343	2.86339	12.2787	3.95e-11	2.79e-10	15.168	729920	ISPD	isoprenoid synthase domain containing [Source:HGNC Symbol;Acc:HGNC:37276]	7	16087527	16421322	-1
ENSG00000156170	1.01802	2.02514	3.48747	13.1935	1.01e-11	8.15e-11	16.4237	137682	NDUFAF6	NADH:ubiquinone oxidoreductase complex assembly factor 6 [Source:HGNC Symbol;Acc:HGNC:28625]	8	94895767	95116455	1
ENSG00000117139	1.01884	2.0263	8.40564	22.4009	2.74e-16	7.02e-15	26.7171	10765	KDM5B	lysine demethylase 5B [Source:HGNC Symbol;Acc:HGNC:18039]	1	202724491	202809470	-1
ENSG00000136114	1.01957	2.02732	0.964178	6.97928	6.31e-07	1.95e-06	5.6931	55901	THSD1	thrombospondin type 1 domain containing 1 [Source:HGNC Symbol;Acc:HGNC:17754]	13	52377167	52406494	-1
ENSG00000164100	1.02025	2.02827	2.86088	9.61585	3.35e-09	1.57e-08	10.5866	9348	NDST3	N-deacetylase and N-sulfotransferase 3 [Source:HGNC Symbol;Acc:HGNC:7682]	4	118033618	118258648	1
ENSG00000164105	1.02108	2.02943	4.33048	16.7886	9.25e-14	1.2e-12	21.099	8819	SAP30	Sin3A associated protein 30 [Source:HGNC Symbol;Acc:HGNC:10532]	4	173369969	173377532	1
ENSG00000198001	1.02154	2.03008	3.75433	14.5855	1.47e-12	1.43e-11	18.3611	51135	IRAK4	interleukin 1 receptor associated kinase 4 [Source:HGNC Symbol;Acc:HGNC:17967]	12	43758944	43789543	1
ENSG00000251348	1.02292	2.03203	-0.0806192	4.46329	0.000208346	0.000425366	0.0881235		HSPD1P11	heat shock protein family D (Hsp60) member 1 pseudogene 11 [Source:HGNC Symbol;Acc:HGNC:35142]	5	95768999	95770700	1
ENSG00000259367	1.02361	2.03299	0.414176	6.19336	3.59e-06	9.69e-06	4.05431		RP11-815J21.4		15	85619623	85670948	-1
ENSG00000218226	1.02707	2.03788	2.4267	10.3665	8.85e-10	4.66e-09	12.0687		TATDN2P2	TatD DNase domain containing 2 pseudogene 2 [Source:HGNC Symbol;Acc:HGNC:39255]	6	158609706	158621636	-1
ENSG00000105419	1.02743	2.03839	4.13405	14.4872	1.68e-12	1.62e-11	18.1383	56917	MEIS3	Meis homeobox 3 [Source:HGNC Symbol;Acc:HGNC:29537]	19	47403124	47419523	-1
ENSG00000110446	1.02759	2.03862	3.31649	12.9332	1.48e-11	1.15e-10	16.0725	51296	SLC15A3	solute carrier family 15 member 3 [Source:HGNC Symbol;Acc:HGNC:18068]	11	60937084	60952530	-1
ENSG00000232842	1.0279	2.03905	3.88104	15.3888	5.16e-13	5.57e-12	19.4165		RP5-961K14.1		X	95973328	95974315	-1
ENSG00000262580	1.02798	2.03917	1.19357	6.9068	7.39e-07	2.25e-06	5.47763		RP11-334C17.5		17	80200673	80205949	-1
ENSG00000066739	1.02812	2.03937	5.75467	24.1278	5.96e-17	1.85e-15	28.4814	55102	ATG2B	autophagy related 2B [Source:HGNC Symbol;Acc:HGNC:20187]	14	96279202	96363870	-1
ENSG00000139767	1.02861	2.04006	0.122418	5.83803	8.09e-06	2.06e-05	3.29904	84530	SRRM4	serine/arginine repetitive matrix 4 [Source:HGNC Symbol;Acc:HGNC:29389]	12	118981495	119163051	1
ENSG00000110328	1.02936	2.04112	0.143347	4.70113	0.000117702	0.000250212	0.605747	374378	GALNT18	polypeptide N-acetylgalactosaminyltransferase 18 [Source:HGNC Symbol;Acc:HGNC:30488]	11	11270876	11622005	-1
ENSG00000234996	1.03003	2.04207	1.42038	7.5119	2.03e-07	6.83e-07	6.73765	148709	RP11-480I12.9		1	202861754	202875241	1
ENSG00000065600	1.03222	2.04517	4.71216	20.8789	1.15e-15	2.45e-14	25.5714	55248	TMEM206	transmembrane protein 206 [Source:HGNC Symbol;Acc:HGNC:25593]	1	212363931	212414901	-1
ENSG00000006756	1.03263	2.04574	3.36861	13.8041	4.26e-12	3.75e-11	17.3488	414	ARSD	arylsulfatase D [Source:HGNC Symbol;Acc:HGNC:717]	X	2903970	2929351	-1
ENSG00000238018	1.03442	2.04829	5.16883	23.1986	1.34e-16	3.73e-15	27.7251		AC093110.3		2	54661011	54680045	-1
ENSG00000153406	1.03484	2.04889	2.50345	11.1653	2.31e-10	1.37e-09	13.4362	57407	NMRAL1	NmrA like redox sensor 1 [Source:HGNC Symbol;Acc:HGNC:24987]	16	4461680	4495763	-1
ENSG00000198792	1.0355	2.04982	5.34712	17.4236	4.42e-14	6.2e-13	21.6751	25829	TMEM184B	transmembrane protein 184B [Source:HGNC Symbol;Acc:HGNC:1310]	22	38219291	38273034	-1
ENSG00000214694	1.03577	2.05021	-0.0515856	5.55493	1.56e-05	3.8e-05	2.67557	100271715	ARHGEF33	Rho guanine nucleotide exchange factor 33 [Source:HGNC Symbol;Acc:HGNC:37252]	2	38889880	38975449	1
ENSG00000110628	1.03795	2.0533	0.714169	6.34613	2.55e-06	7.05e-06	4.33446	5002	SLC22A18	solute carrier family 22 member 18 [Source:HGNC Symbol;Acc:HGNC:10964]	11	2899721	2925246	1
ENSG00000116985	1.0394	2.05538	1.16721	6.47609	1.9e-06	5.38e-06	4.51983	656	BMP8B	bone morphogenetic protein 8b [Source:HGNC Symbol;Acc:HGNC:1075]	1	39757182	39788861	-1
ENSG00000149531	1.043	2.0605	2.40092	10.0717	1.48e-09	7.5e-09	11.5454		FRG1BP	FSHD region gene 1 family member B, pseudogene [Source:HGNC Symbol;Acc:HGNC:15792]	20	30377372	30399257	1
ENSG00000237976	1.04303	2.06055	1.84774	7.84551	1.02e-07	3.61e-07	7.33595		RP11-126K1.6		1	151346967	151348027	1
ENSG00000246898	1.04312	2.06068	3.22005	12.9024	1.55e-11	1.2e-10	16.0491		LINC00920	long intergenic non-protein coding RNA 920 [Source:HGNC Symbol;Acc:HGNC:48611]	16	66408524	66412135	1
ENSG00000087303	1.0443	2.06237	5.83653	27.8569	3.06e-18	1.38e-16	31.552	22795	NID2	nidogen 2 [Source:HGNC Symbol;Acc:HGNC:13389]	14	52004803	52069228	-1
ENSG00000015475	1.04496	2.06331	4.92007	15.1685	6.84e-13	7.15e-12	18.903	637	BID	BH3 interacting domain death agonist [Source:HGNC Symbol;Acc:HGNC:1050]	22	17734138	17774770	-1
ENSG00000109814	1.04511	2.06353	7.14554	23.8134	7.8e-17	2.31e-15	28.0855	7358	UGDH	UDP-glucose 6-dehydrogenase [Source:HGNC Symbol;Acc:HGNC:12525]	4	39498755	39528311	-1
ENSG00000228878	1.04556	2.06416	0.629836	5.79013	9.03e-06	2.28e-05	3.07268		SEPT7-AS1	SEPT7 antisense RNA 1 (head to head) [Source:HGNC Symbol;Acc:HGNC:51153]	7	35751856	35800616	-1
ENSG00000090097	1.05029	2.07095	7.11931	28.7418	1.6e-18	7.99e-17	32.1268	57060	PCBP4	poly(rC) binding protein 4 [Source:HGNC Symbol;Acc:HGNC:8652]	3	51957454	51974016	-1
ENSG00000234420	1.05079	2.07167	6.17322	19.9429	2.92e-15	5.47e-14	24.3935	100129482	ZNF37BP	zinc finger protein 37B, pseudogene [Source:HGNC Symbol;Acc:HGNC:13103]	10	42513510	42552822	-1
ENSG00000164048	1.05403	2.07632	5.14188	21.7933	4.8e-16	1.14e-14	26.4032	51385	ZNF589	zinc finger protein 589 [Source:HGNC Symbol;Acc:HGNC:16747]	3	48241100	48299253	1
ENSG00000165868	1.0541	2.07642	2.54512	11.1522	2.36e-10	1.4e-09	13.4043	259217	HSPA12A	heat shock protein family A (Hsp70) member 12A [Source:HGNC Symbol;Acc:HGNC:19022]	10	116671192	116849741	-1
ENSG00000230658	1.05469	2.07727	1.29031	7.31955	3.05e-07	9.93e-07	6.35673	100775104	KLHL7-AS1	KLHL7 antisense RNA 1 (head to head) [Source:HGNC Symbol;Acc:HGNC:43431]	7	23101228	23105703	-1
ENSG00000148948	1.0573	2.08103	1.65164	8.93578	1.19e-08	4.97e-08	9.59108	57689	LRRC4C	leucine rich repeat containing 4C [Source:HGNC Symbol;Acc:HGNC:29317]	11	40114203	41459773	-1
ENSG00000203930	1.05761	2.08149	0.211246	5.89234	7.14e-06	1.83e-05	3.40579	286411	LINC00632	long intergenic non-protein coding RNA 632 [Source:HGNC Symbol;Acc:HGNC:27865]	X	140709767	140772679	1
ENSG00000160867	1.0577	2.08162	3.84537	14.7321	1.21e-12	1.2e-11	18.5422	2264	FGFR4	fibroblast growth factor receptor 4 [Source:HGNC Symbol;Acc:HGNC:3691]	5	177086886	177098144	1
ENSG00000169122	1.0604	2.0855	4.20369	16.472	1.35e-13	1.7e-12	20.7353	90362	FAM110B	family with sequence similarity 110 member B [Source:HGNC Symbol;Acc:HGNC:28587]	8	57994509	58204279	1
ENSG00000138760	1.06227	2.08821	7.31694	24.1017	6.09e-17	1.88e-15	28.3332	950	SCARB2	scavenger receptor class B member 2 [Source:HGNC Symbol;Acc:HGNC:1665]	4	76158737	76213893	-1
ENSG00000282218	1.065	2.09217	2.84011	12.4327	3.13e-11	2.25e-10	15.416		RP1-179P9.3		6	117318211	117573571	-1
ENSG00000114200	1.06555	2.09297	6.59174	24.7312	3.58e-17	1.21e-15	28.9307	590	BCHE	butyrylcholinesterase [Source:HGNC Symbol;Acc:HGNC:983]	3	165772904	165837472	-1
ENSG00000196782	1.06623	2.09396	4.76559	20.1639	2.33e-15	4.52e-14	24.8285	55534	MAML3	mastermind like transcriptional coactivator 3 [Source:HGNC Symbol;Acc:HGNC:16272]	4	139716753	140154184	-1
ENSG00000279660	1.06659	2.09448	2.1326	7.51842	2.01e-07	6.74e-07	6.5691		RP11-849N15.3		17	15260513	15261841	1
ENSG00000147174	1.06684	2.09484	0.520241	6.13534	4.1e-06	1.1e-05	3.89756	93953	ACRC	acidic repeat containing [Source:HGNC Symbol;Acc:HGNC:15805]	X	71578411	71613583	1
ENSG00000154914	1.06691	2.09494	1.30713	7.87579	9.59e-08	3.4e-07	7.53406	124739	USP43	ubiquitin specific peptidase 43 [Source:HGNC Symbol;Acc:HGNC:20072]	17	9644698	9729691	1
ENSG00000213977	1.06741	2.09567	5.70517	17.4102	4.48e-14	6.28e-13	21.6075	30851	TAX1BP3	Tax1 binding protein 3 [Source:HGNC Symbol;Acc:HGNC:30684]	17	3662896	3668682	-1
ENSG00000117280	1.06744	2.09571	3.5855	14.1102	2.79e-12	2.56e-11	17.7361	8934	RAB29	RAB29, member RAS oncogene family [Source:HGNC Symbol;Acc:HGNC:9789]	1	205767986	205775460	-1
ENSG00000181026	1.06937	2.09852	6.96973	17.6334	3.48e-14	5.01e-13	21.7519	64782	AEN	apoptosis enhancing nuclease [Source:HGNC Symbol;Acc:HGNC:25722]	15	88621296	88632282	1
ENSG00000182179	1.06973	2.09904	0.560499	7.07049	5.19e-07	1.63e-06	5.98486	7318 100847079	UBA7	ubiquitin like modifier activating enzyme 7 [Source:HGNC Symbol;Acc:HGNC:12471]	3	49805207	49813946	-1
ENSG00000251034	1.07002	2.09947	1.16763	6.3365	2.6e-06	7.19e-06	4.20262		RP11-582J16.4		8	22540845	22545405	-1
ENSG00000147364	1.0704	2.10001	2.67953	11.9908	6.16e-11	4.18e-10	14.7544	26260	FBXO25	F-box protein 25 [Source:HGNC Symbol;Acc:HGNC:13596]	8	406428	477967	1
ENSG00000136603	1.07097	2.10084	5.28051	26.1926	1.1e-17	4.24e-16	30.2998	6498	SKIL	SKI-like proto-oncogene [Source:HGNC Symbol;Acc:HGNC:10897]	3	170357678	170396835	1
ENSG00000165983	1.07129	2.10131	4.36587	18.3383	1.59e-14	2.48e-13	22.9207	9317	PTER	phosphotriesterase related [Source:HGNC Symbol;Acc:HGNC:9590]	10	16436943	16513745	1
ENSG00000121210	1.07175	2.10198	5.54961	26.6804	7.48e-18	3.06e-16	30.6593	23240	KIAA0922	KIAA0922 [Source:HGNC Symbol;Acc:HGNC:29146]	4	153466346	153636711	1
ENSG00000106261	1.0718	2.10206	7.51668	30.7982	3.79e-19	2.33e-17	33.5986	7586	ZKSCAN1	zinc finger with KRAB and SCAN domains 1 [Source:HGNC Symbol;Acc:HGNC:13101]	7	100015572	100041689	1
ENSG00000231889	1.07242	2.10295	3.63718	13.4922	6.61e-12	5.55e-11	16.8319		TRAF3IP2-AS1	TRAF3IP2 antisense RNA 1 [Source:HGNC Symbol;Acc:HGNC:40005]	6	111483511	111598302	1
ENSG00000227512	1.07323	2.10414	-0.0274036	5.035	5.3e-05	0.000118911	1.44133		RP11-413M3.4		9	136542881	136543835	1
ENSG00000139433	1.07367	2.10477	4.99019	22.0734	3.7e-16	9.17e-15	26.6992	51228	GLTP	glycolipid transfer protein [Source:HGNC Symbol;Acc:HGNC:24867]	12	109850943	109880488	-1
ENSG00000255176	1.07422	2.10558	0.186631	5.67888	1.17e-05	2.9e-05	2.91437		AP002954.3		11	118636620	118638097	1
ENSG00000236829	1.07435	2.10577	0.999882	7.63253	1.58e-07	5.4e-07	7.09523	100134368	Z97634.3		16	382097	392960	1
ENSG00000100065	1.07609	2.10831	2.40895	10.187	1.21e-09	6.22e-09	11.7521	29775	CARD10	caspase recruitment domain family member 10 [Source:HGNC Symbol;Acc:HGNC:16422]	22	37490362	37519542	-1
ENSG00000162976	1.0768	2.10936	2.4067	12.2399	4.19e-11	2.95e-10	15.2156	130814	PQLC3	PQ loop repeat containing 3 [Source:HGNC Symbol;Acc:HGNC:28503]	2	11155198	11178874	1
ENSG00000196776	1.07712	2.10982	5.85655	20.9827	1.04e-15	2.25e-14	25.5011	961	CD47	CD47 molecule [Source:HGNC Symbol;Acc:HGNC:1682]	3	108043298	108091025	-1
ENSG00000163932	1.07717	2.1099	3.89025	15.3708	5.28e-13	5.68e-12	19.3914	5580	PRKCD	protein kinase C delta [Source:HGNC Symbol;Acc:HGNC:9399]	3	53156009	53192717	1
ENSG00000128573	1.07787	2.11092	3.31327	13.2929	8.79e-12	7.17e-11	16.6144	93986	FOXP2	forkhead box P2 [Source:HGNC Symbol;Acc:HGNC:13875]	7	114086327	114693772	1
ENSG00000227855	1.07832	2.11157	1.13286	7.26655	3.41e-07	1.1e-06	6.28054	442524	DPY19L2P3	DPY19L2 pseudogene 3 [Source:HGNC Symbol;Acc:HGNC:22367]	7	29650227	29742594	1
ENSG00000185608	1.07919	2.11284	4.54355	18.119	2.02e-14	3.1e-13	22.6347	64976	MRPL40	mitochondrial ribosomal protein L40 [Source:HGNC Symbol;Acc:HGNC:14491]	22	19431902	19436075	1
ENSG00000227279	1.07996	2.11398	3.5936	14.9709	8.84e-13	9.04e-12	18.9249		AC015933.2		18	27954519	27963687	1
ENSG00000184258	1.07997	2.11399	2.60633	10.0717	1.48e-09	7.5e-09	11.4939	1038	CDR1	cerebellar degeneration related protein 1 [Source:HGNC Symbol;Acc:HGNC:1798]	X	140782405	140784871	-1
ENSG00000137842	1.08046	2.11471	3.25576	12.7549	1.93e-11	1.46e-10	15.8157	80021	TMEM62	transmembrane protein 62 [Source:HGNC Symbol;Acc:HGNC:26269]	15	43123279	43185146	1
ENSG00000217330	1.0808	2.11521	2.55621	8.22179	4.77e-08	1.79e-07	7.9317		SSXP10	SSX family pseudogene 10 [Source:HGNC Symbol;Acc:HGNC:30638]	6	118589070	118589634	1
ENSG00000182054	1.08106	2.11559	6.80803	30.9635	3.39e-19	2.13e-17	33.7519	3418	IDH2	isocitrate dehydrogenase (NADP(+)) 2, mitochondrial [Source:HGNC Symbol;Acc:HGNC:5383]	15	90083045	90102504	-1
ENSG00000255470	1.08274	2.11806	2.66282	12.0462	5.65e-11	3.87e-10	14.8475		RP11-113D6.6		11	18140186	18189495	-1
ENSG00000245060	1.08365	2.11939	0.516957	6.27265	3e-06	8.22e-06	4.21258	729678	LINC00847	long intergenic non-protein coding RNA 847 [Source:HGNC Symbol;Acc:HGNC:45050]	5	180830957	180835726	1
ENSG00000122863	1.08445	2.12057	5.58672	22.8587	1.81e-16	4.87e-15	27.3517	9469	CHST3	carbohydrate sulfotransferase 3 [Source:HGNC Symbol;Acc:HGNC:1971]	10	71964365	72013564	1
ENSG00000109099	1.08525	2.12174	5.25925	13.9719	3.38e-12	3.03e-11	17.1834	5376	PMP22	peripheral myelin protein 22 [Source:HGNC Symbol;Acc:HGNC:9118]	17	15229777	15265326	-1
ENSG00000255138	1.08567	2.12236	2.66417	12.0738	5.42e-11	3.73e-10	14.8912		GLTPP1	glycolipid transfer protein pseudogene 1 [Source:HGNC Symbol;Acc:HGNC:33991]	11	18189000	18189621	1
ENSG00000141068	1.08603	2.12289	3.60135	13.4583	6.94e-12	5.81e-11	16.7906	8844	KSR1	kinase suppressor of ras 1 [Source:HGNC Symbol;Acc:HGNC:6465]	17	27456714	27626438	1
ENSG00000059573	1.08713	2.12451	7.55184	26.3541	9.64e-18	3.8e-16	30.2368	5832	ALDH18A1	aldehyde dehydrogenase 18 family member A1 [Source:HGNC Symbol;Acc:HGNC:9722]	10	95605929	95656706	-1
ENSG00000132016	1.08864	2.12674	3.11424	12.7452	1.96e-11	1.48e-10	15.8349	79173	C19orf57	chromosome 19 open reading frame 57 [Source:HGNC Symbol;Acc:HGNC:28153]	19	13882348	13906452	-1
ENSG00000149328	1.08926	2.12764	4.04609	19.0104	7.68e-15	1.31e-13	23.7367	89944	GLB1L2	galactosidase beta 1 like 2 [Source:HGNC Symbol;Acc:HGNC:25129]	11	134331874	134378341	1
ENSG00000236432	1.08981	2.12847	1.34736	7.23529	3.65e-07	1.17e-06	6.16036		AC097662.2		2	227221052	227325201	-1
ENSG00000124766	1.09081	2.12993	6.32893	26.1394	1.14e-17	4.4e-16	30.1386	6659	SOX4	SRY-box 4 [Source:HGNC Symbol;Acc:HGNC:11200]	6	21592768	21598619	1
ENSG00000281508	1.09107	2.13032	2.58525	10.1524	1.29e-09	6.57e-09	11.6458		CDR1-AS	CDR1 antisense RNA [Source:HGNC Symbol;Acc:HGNC:48926]	X	140783176	140784660	1
ENSG00000188580	1.09336	2.13371	0.0947519	5.43469	2.06e-05	4.93e-05	2.36145	154215	NKAIN2	Na+/K+ transporting ATPase interacting 2 [Source:HGNC Symbol;Acc:HGNC:16443]	6	123804141	124825657	1
ENSG00000137486	1.09375	2.13429	5.24503	21.825	4.66e-16	1.12e-14	26.4183	408	ARRB1	arrestin beta 1 [Source:HGNC Symbol;Acc:HGNC:711]	11	75264182	75351705	-1
ENSG00000185187	1.0946	2.13554	0.825727	6.74672	1.05e-06	3.11e-06	5.21093	59307	SIGIRR	single Ig and TIR domain containing [Source:HGNC Symbol;Acc:HGNC:30575]	11	405716	417455	-1
ENSG00000226508	1.09494	2.13605	-0.00547487	5.5942	1.42e-05	3.49e-05	2.75789	105373984	AC104655.3		2	105144113	105145424	1
ENSG00000259053	1.09496	2.13607	1.79486	8.38117	3.48e-08	1.34e-07	8.454		RP11-33N16.3		14	89412312	89954659	-1
ENSG00000134532	1.09885	2.14184	6.74291	25.6722	1.66e-17	6.17e-16	29.7204	6660	SOX5	SRY-box 5 [Source:HGNC Symbol;Acc:HGNC:11201]	12	23529500	23951032	-1
ENSG00000104419	1.09984	2.14332	1.91917	10.0956	1.42e-09	7.22e-09	11.707	10397	NDRG1	N-myc downstream regulated 1 [Source:HGNC Symbol;Acc:HGNC:7679]	8	133237171	133302022	-1
ENSG00000203684	1.10064	2.14451	-0.257515	5.26161	3.1e-05	7.21e-05	2.02824	574432	IBA57-AS1	IBA57 antisense RNA 1 (head to head) [Source:HGNC Symbol;Acc:HGNC:32062]	1	228164086	228165512	-1
ENSG00000266714	1.10104	2.14509	0.618363	7.37344	2.72e-07	8.94e-07	6.62824		MYO15B	myosin XVB [Source:HGNC Symbol;Acc:HGNC:14083]	17	75588058	75626501	1
ENSG00000109452	1.10147	2.14573	6.52824	17.7492	3.05e-14	4.45e-13	21.9211	8821	INPP4B	inositol polyphosphate-4-phosphatase type II B [Source:HGNC Symbol;Acc:HGNC:6075]	4	142023160	142847432	-1
ENSG00000104687	1.10314	2.14822	7.03652	27.431	4.21e-18	1.82e-16	31.1259	2936	GSR	glutathione-disulfide reductase [Source:HGNC Symbol;Acc:HGNC:4623]	8	30678061	30727926	-1
ENSG00000140945	1.10332	2.14849	2.22738	10.0167	1.63e-09	8.19e-09	11.4894	1012	CDH13	cadherin 13 [Source:HGNC Symbol;Acc:HGNC:1753]	16	82626803	83800640	1
ENSG00000270300	1.10349	2.14874	0.50749	7.20671	3.88e-07	1.24e-06	6.29264		PHACTR2P1	phosphatase and actin regulator 2 pseudogene 1 [Source:HGNC Symbol;Acc:HGNC:49488]	10	119793589	119816642	-1
ENSG00000184470	1.1047	2.15054	0.466805	5.23848	3.28e-05	7.58e-05	1.81233	10587	TXNRD2	thioredoxin reductase 2 [Source:HGNC Symbol;Acc:HGNC:18155]	22	19875517	19941992	-1
ENSG00000236199	1.10626	2.15287	-0.0576533	5.09609	4.59e-05	0.000103784	1.5934		RP11-264I13.2		9	2041900	2046023	-1
ENSG00000257769	1.10715	2.15419	0.054924	6.06477	4.81e-06	1.27e-05	3.83722		CTB-193M12.1		16	15608474	15610563	1
ENSG00000182648	1.10791	2.15534	1.48612	8.88811	1.3e-08	5.41e-08	9.5378	129790	LINC01006	long intergenic non-protein coding RNA 1006 [Source:HGNC Symbol;Acc:HGNC:48971]	7	156472196	156640654	-1
ENSG00000164081	1.10941	2.15757	4.23867	20.4754	1.71e-15	3.47e-14	25.2524	51368	TEX264	testis expressed 264 [Source:HGNC Symbol;Acc:HGNC:30247]	3	51662693	51704323	1
ENSG00000231721	1.11009	2.15859	-0.112024	4.74084	0.00010702	0.000228882	0.758608	378805	LINC-PINT	long intergenic non-protein coding RNA, p53 induced transcript [Source:HGNC Symbol;Acc:HGNC:26885]	7	130941760	131110176	-1
ENSG00000104324	1.11192	2.16134	1.53549	8.57337	2.38e-08	9.49e-08	8.9041	10404	CPQ	carboxypeptidase Q [Source:HGNC Symbol;Acc:HGNC:16910]	8	96645227	97149654	1
ENSG00000104388	1.11207	2.16156	6.78768	26.8856	6.38e-18	2.64e-16	30.7092	5862	RAB2A	RAB2A, member RAS oncogene family [Source:HGNC Symbol;Acc:HGNC:9763]	8	60516857	60623627	1
ENSG00000173890	1.11317	2.1632	0.0805249	5.89103	7.16e-06	1.84e-05	3.4311	26996	GPR160	G protein-coupled receptor 160 [Source:HGNC Symbol;Acc:HGNC:23693]	3	170037929	170085403	1
ENSG00000267128	1.1134	2.16355	2.78538	13.0323	1.28e-11	1.01e-10	16.3494		RP11-449J21.5		17	76140556	76154650	1
ENSG00000078967	1.11423	2.1648	3.2567	14.5741	1.49e-12	1.45e-11	18.4617	51619	UBE2D4	ubiquitin conjugating enzyme E2 D4 (putative) [Source:HGNC Symbol;Acc:HGNC:21647]	7	43926438	43956136	1
ENSG00000260898	1.11605	2.16752	1.78443	10.3963	8.41e-10	4.45e-09	12.2765	100287559	ADPGK-AS1	ADPGK antisense RNA 1 [Source:HGNC Symbol;Acc:HGNC:44144]	15	72782835	72798199	1
ENSG00000264364	1.11687	2.16876	7.74427	26.4807	8.73e-18	3.52e-16	30.3302	140735	DYNLL2	dynein light chain LC8-type 2 [Source:HGNC Symbol;Acc:HGNC:24596]	17	58083415	58095536	1
ENSG00000106868	1.11964	2.17293	3.90324	17.5937	3.64e-14	5.19e-13	22.1587	64420	SUSD1	sushi domain containing 1 [Source:HGNC Symbol;Acc:HGNC:25413]	9	112040785	112175408	-1
ENSG00000071054	1.12044	2.17414	8.55349	37.9024	4.92e-21	5.59e-19	38.0541	9448	MAP4K4	mitogen-activated protein kinase kinase kinase kinase 4 [Source:HGNC Symbol;Acc:HGNC:6866]	2	101696850	101894689	1
ENSG00000254645	1.12054	2.17429	0.00519029	6.06857	4.77e-06	1.26e-05	3.85633		RP11-396O20.2		11	15701963	15758898	-1
ENSG00000267506	1.12132	2.17546	1.46698	8.18211	5.16e-08	1.92e-07	8.12936		RP11-13K12.1		17	77546940	77563243	1
ENSG00000156103	1.1219	2.17633	7.81382	21.4952	6.36e-16	1.46e-14	25.8679	4325	MMP16	matrix metallopeptidase 16 [Source:HGNC Symbol;Acc:HGNC:7162]	8	88032009	88328025	-1
ENSG00000186951	1.12209	2.17662	3.75379	15.9654	2.5e-13	2.92e-12	20.1956	5465	PPARA	peroxisome proliferator activated receptor alpha [Source:HGNC Symbol;Acc:HGNC:9232]	22	46150521	46243756	1
ENSG00000082482	1.12272	2.17757	1.22147	6.56699	1.56e-06	4.47e-06	4.71238	3776	KCNK2	potassium two pore domain channel subfamily K member 2 [Source:HGNC Symbol;Acc:HGNC:6277]	1	215005775	215237093	1
ENSG00000012983	1.12485	2.18079	6.27158	27.7983	3.19e-18	1.44e-16	31.4659	11183	MAP4K5	mitogen-activated protein kinase kinase kinase kinase 5 [Source:HGNC Symbol;Acc:HGNC:6867]	14	50418501	50561126	-1
ENSG00000156299	1.12594	2.18243	7.10187	32.8389	9.93e-20	7.13e-18	35.007	7074	TIAM1	T-cell lymphoma invasion and metastasis 1 [Source:HGNC Symbol;Acc:HGNC:11805]	21	31118416	31559977	-1
ENSG00000271270	1.12631	2.183	2.85214	13.3457	8.15e-12	6.69e-11	16.8017	100507032	TMCC1-AS1	TMCC1 antisense RNA 1 (head to head) [Source:HGNC Symbol;Acc:HGNC:49060]	3	129893871	129918575	1
ENSG00000169031	1.12715	2.18427	0.372818	5.93217	6.51e-06	1.69e-05	3.46262	1285	COL4A3	collagen type IV alpha 3 chain [Source:HGNC Symbol;Acc:HGNC:2204]	2	227164565	227314792	1
ENSG00000261488	1.12743	2.18469	1.33766	8.45055	3.03e-08	1.18e-07	8.70519		RP11-757F18.5		3	112133423	112135359	1
ENSG00000274956	1.12808	2.18567	2.09719	9.4772	4.31e-09	1.99e-08	10.5221	643763	UG0898H09	uncharacterized LOC643763 [Source:EntrezGene;Acc:643763]	8	62977861	62984900	1
ENSG00000259661	1.13081	2.18982	2.22082	10.6891	5.1e-10	2.82e-09	12.6889		AC068831.15		15	90920218	90921186	-1
ENSG00000278619	1.13114	2.19032	1.91674	8.58242	2.34e-08	9.33e-08	8.82901	79922	MRM1	mitochondrial rRNA methyltransferase 1 [Source:HGNC Symbol;Acc:HGNC:26202]	17	36601572	36608971	1
ENSG00000173040	1.13135	2.19064	1.50205	8.28552	4.2e-08	1.59e-07	8.33225	132884	EVC2	EvC ciliary complex subunit 2 [Source:HGNC Symbol;Acc:HGNC:19747]	4	5542772	5709548	-1
ENSG00000156469	1.13213	2.19182	4.91324	23.3089	1.21e-16	3.43e-15	27.869	51001	MTERF3	mitochondrial transcription termination factor 3 [Source:HGNC Symbol;Acc:HGNC:24258]	8	96239398	96261610	-1
ENSG00000158467	1.13736	2.19978	4.75318	20.0911	2.51e-15	4.81e-14	24.7559	23382	AHCYL2	adenosylhomocysteinase like 2 [Source:HGNC Symbol;Acc:HGNC:22204]	7	129225023	129430211	1
ENSG00000103150	1.13781	2.20047	3.82563	16.2317	1.8e-13	2.17e-12	20.5182	23417	MLYCD	malonyl-CoA decarboxylase [Source:HGNC Symbol;Acc:HGNC:7150]	16	83899126	83927026	1
ENSG00000156515	1.1379	2.2006	7.28052	28.2529	2.28e-18	1.09e-16	31.7483	3098	HK1	hexokinase 1 [Source:HGNC Symbol;Acc:HGNC:4922]	10	69269984	69401882	1
ENSG00000254429	1.13916	2.20253	2.98916	13.3491	8.11e-12	6.67e-11	16.7752		CTD-2562J17.7		11	75260127	75261025	1
ENSG00000259113	1.13929	2.20272	1.92707	8.99835	1.05e-08	4.48e-08	9.64704		RP11-406H23.2		14	50448807	50456742	1
ENSG00000054793	1.13987	2.20361	4.38035	19.4855	4.67e-15	8.39e-14	24.1856	10079	ATP9A	ATPase phospholipid transporting 9A (putative) [Source:HGNC Symbol;Acc:HGNC:13540]	20	51596514	51768634	-1
ENSG00000162600	1.14007	2.20392	2.94925	11.9829	6.24e-11	4.23e-10	14.6778	115209	OMA1	OMA1 zinc metallopeptidase [Source:HGNC Symbol;Acc:HGNC:29661]	1	58415384	58546802	-1
ENSG00000160410	1.14022	2.20415	4.44411	18.654	1.12e-14	1.83e-13	23.2616	92799	SHKBP1	SH3KBP1 binding protein 1 [Source:HGNC Symbol;Acc:HGNC:19214]	19	40576851	40591399	1
ENSG00000245148	1.142	2.20686	1.39602	10.2272	1.13e-09	5.82e-09	12.0618		ARAP1-AS2	ARAP1 antisense RNA 2 [Source:HGNC Symbol;Acc:HGNC:39994]	11	72700474	72705607	1
ENSG00000229851	1.14313	2.20859	1.34555	8.43913	3.1e-08	1.2e-07	8.68041		ARSD-AS1	ARSD antisense RNA 1 [Source:HGNC Symbol;Acc:HGNC:40085]	X	2904904	2906081	1
ENSG00000233421	1.14328	2.20882	1.38542	8.72766	1.77e-08	7.2e-08	9.24632	100132147	RP5-875O13.1		1	16533886	16536172	-1
ENSG00000254963	1.14394	2.20984	2.51768	13.6458	5.32e-12	4.57e-11	17.3172		CTD-2562J17.9		11	75264289	75265170	1
ENSG00000163864	1.1451	2.21162	0.76299	7.25731	3.48e-07	1.12e-06	6.34669	349565	NMNAT3	nicotinamide nucleotide adenylyltransferase 3 [Source:HGNC Symbol;Acc:HGNC:20989]	3	139560180	139678017	-1
ENSG00000196227	1.14555	2.21231	5.92414	29.8878	7.08e-19	4.01e-17	33.0586	63939	FAM217B	family with sequence similarity 217 member B [Source:HGNC Symbol;Acc:HGNC:16170]	20	59933764	59948680	1
ENSG00000131089	1.14572	2.21256	6.98185	31.7817	1.97e-19	1.29e-17	34.3057	23229	ARHGEF9	Cdc42 guanine nucleotide exchange factor 9 [Source:HGNC Symbol;Acc:HGNC:14561]	X	63634967	63809274	-1
ENSG00000151883	1.14585	2.21276	5.76529	29.8161	7.44e-19	4.19e-17	33.0233	79668	PARP8	poly(ADP-ribose) polymerase family member 8 [Source:HGNC Symbol;Acc:HGNC:26124]	5	50665899	50846522	1
ENSG00000261770	1.1473	2.21499	0.948945	6.45197	2.01e-06	5.66e-06	4.51982		CTC-459F4.1		19	27757184	27760849	-1
ENSG00000233952	1.14832	2.21655	1.91638	8.15712	5.43e-08	2.01e-07	7.96709		FTLP15	ferritin light chain pseudogene 15 [Source:HGNC Symbol;Acc:HGNC:37965]	7	45997540	45998071	-1
ENSG00000245275	1.15143	2.22134	0.202434	6.58138	1.51e-06	4.34e-06	4.9791		SAP30L-AS1	SAP30L antisense RNA 1 (head to head) [Source:HGNC Symbol;Acc:HGNC:26760]	5	154329437	154445850	-1
ENSG00000174500	1.15208	2.22234	2.08312	11.1344	2.43e-10	1.43e-09	13.486	257144	GCSAM	germinal center associated signaling and motility [Source:HGNC Symbol;Acc:HGNC:20253]	3	112120841	112133305	-1
ENSG00000254528	1.15291	2.22362	5.37028	21.6916	5.28e-16	1.24e-14	26.2705		RP11-728F11.4		11	117833719	117838942	1
ENSG00000196951	1.1542	2.22561	0.0858493	6.73667	1.07e-06	3.17e-06	5.34898	100129858	SCOC-AS1	SCOC antisense RNA 1 [Source:HGNC Symbol;Acc:HGNC:50601]	4	140283724	140373381	-1
ENSG00000114529	1.15525	2.22722	4.98148	19.6642	3.88e-15	7.06e-14	24.2639	79669	C3orf52	chromosome 3 open reading frame 52 [Source:HGNC Symbol;Acc:HGNC:26255]	3	112086335	112131004	1
ENSG00000224468	1.1561	2.22854	1.12836	8.0059	7.36e-08	2.67e-07	7.84746		RP11-181K3.4		1	183138402	183141282	-1
ENSG00000213337	1.15626	2.22879	4.17231	21.2272	8.21e-16	1.83e-14	26.0247	51239	ANKRD39	ankyrin repeat domain 39 [Source:HGNC Symbol;Acc:HGNC:28640]	2	96836611	96858095	-1
ENSG00000259877	1.15646	2.2291	1.45261	9.81404	2.34e-09	1.13e-08	11.3012		RP11-46C24.7		16	89215211	89217653	-1
ENSG00000075391	1.15679	2.22961	6.10026	25.0142	2.83e-17	9.94e-16	29.2171	9462	RASAL2	RAS protein activator like 2 [Source:HGNC Symbol;Acc:HGNC:9874]	1	178094141	178484147	1
ENSG00000176595	1.15742	2.23058	4.84608	26.837	6.62e-18	2.74e-16	30.8863	9920	KBTBD11	kelch repeat and BTB domain containing 11 [Source:HGNC Symbol;Acc:HGNC:29104]	8	1973878	2006936	1
ENSG00000224093	1.15887	2.23282	2.57926	12.4697	2.96e-11	2.14e-10	15.5368		RP5-1033H22.2		1	93592199	93605573	1
ENSG00000106537	1.15934	2.23355	4.4992	21.0758	9.5e-16	2.08e-14	25.8113	27075	TSPAN13	tetraspanin 13 [Source:HGNC Symbol;Acc:HGNC:21643]	7	16753535	16784536	1
ENSG00000196295	1.15943	2.2337	4.59444	16.2292	1.81e-13	2.17e-12	20.35		AC005154.6		7	30516309	30594809	-1
ENSG00000179152	1.16042	2.23522	5.12381	23.7572	8.19e-17	2.41e-15	28.2406	285343	TCAIM	T-cell activation inhibitor, mitochondrial [Source:HGNC Symbol;Acc:HGNC:25241]	3	44338119	44409451	1
ENSG00000137726	1.16061	2.23552	6.10202	22.9476	1.67e-16	4.56e-15	27.3755	53826	FXYD6	FXYD domain containing ion transport regulator 6 [Source:HGNC Symbol;Acc:HGNC:4030]	11	117836976	117877486	-1
ENSG00000228158	1.16065	2.23559	2.85492	11.7508	8.98e-11	5.82e-10	14.325		TLE1P1	transducin like enhancer of split 1 pseudogene 1 [Source:HGNC Symbol;Acc:HGNC:39438]	X	65408084	65408672	1
ENSG00000154874	1.16216	2.23792	-0.0854794	5.582	1.46e-05	3.58e-05	2.74652	284047	CCDC144B	coiled-coil domain containing 144B (pseudogene) [Source:HGNC Symbol;Acc:HGNC:26704]	17	18537800	18625617	-1
ENSG00000279455	1.16266	2.2387	0.392996	6.67905	1.22e-06	3.56e-06	5.15732		RP11-495K9.10		12	131620178	131620765	-1
ENSG00000126561	1.16319	2.23952	1.0091	9.71339	2.81e-09	1.34e-08	11.2095	6776	STAT5A	signal transducer and activator of transcription 5A [Source:HGNC Symbol;Acc:HGNC:11366]	17	42287547	42311943	1
ENSG00000110756	1.16348	2.23997	5.9496	26.3995	9.31e-18	3.73e-16	30.3875	11234	HPS5	HPS5, biogenesis of lysosomal organelles complex 2 subunit 2 [Source:HGNC Symbol;Acc:HGNC:17022]	11	18278668	18322198	-1
ENSG00000033327	1.16359	2.24015	4.95967	23.9711	6.81e-17	2.07e-15	28.4578	9846	GAB2	GRB2 associated binding protein 2 [Source:HGNC Symbol;Acc:HGNC:14458]	11	78215297	78418348	-1
ENSG00000262223	1.16674	2.24503	0.240471	5.33862	2.59e-05	6.09e-05	2.10246		RP11-1055B8.3		17	81376001	81385360	-1
ENSG00000253523	1.16675	2.24506	0.145693	6.57235	1.54e-06	4.42e-06	4.97064		RP11-1112C15.2		8	58031334	58032682	-1
ENSG00000243701	1.16739	2.24605	3.42543	15.9833	2.45e-13	2.87e-12	20.2924	344595	DUBR	DPPA2 upstream binding RNA [Source:HGNC Symbol;Acc:HGNC:48569]	3	107240692	107326964	1
ENSG00000131149	1.16904	2.24863	5.03321	25.6901	1.63e-17	6.09e-16	29.9237	23199	GSE1	Gse1 coiled-coil protein [Source:HGNC Symbol;Acc:HGNC:28979]	16	85169525	85676204	1
ENSG00000246985	1.17041	2.25075	0.429929	6.70843	1.14e-06	3.35e-06	5.21492	144481	SOCS2-AS1	SOCS2 antisense RNA 1 [Source:HGNC Symbol;Acc:HGNC:27054]	12	93542463	93571768	-1
ENSG00000176887	1.17176	2.25286	7.96501	36.1743	1.31e-20	1.27e-18	37.0637	6664	SOX11	SRY-box 11 [Source:HGNC Symbol;Acc:HGNC:11191]	2	5692667	5701385	1
ENSG00000242516	1.17238	2.25383	1.96782	10.9498	3.29e-10	1.89e-09	13.1988	401074	LINC00960	long intergenic non-protein coding RNA 960 [Source:HGNC Symbol;Acc:HGNC:48710]	3	75672391	75679303	1
ENSG00000260300	1.17336	2.25536	1.47354	9.58585	3.54e-09	1.66e-08	10.8742		RP11-505K9.4		16	83908132	83951445	1
ENSG00000019144	1.17341	2.25544	6.53777	28.2302	2.32e-18	1.1e-16	31.7772	23187 102466719	PHLDB1	pleckstrin homology like domain family B member 1 [Source:HGNC Symbol;Acc:HGNC:23697]	11	118606440	118658038	1
ENSG00000048052	1.17403	2.2564	3.04383	12.4177	3.2e-11	2.3e-10	15.3456	9734	HDAC9	histone deacetylase 9 [Source:HGNC Symbol;Acc:HGNC:14065]	7	18086949	19002416	1
ENSG00000171791	1.17438	2.25696	4.11617	12.3793	3.39e-11	2.43e-10	15.0276	596	BCL2	BCL2, apoptosis regulator [Source:HGNC Symbol;Acc:HGNC:990]	18	63123346	63320128	-1
ENSG00000249242	1.17442	2.25702	2.96702	13.0002	1.34e-11	1.05e-10	16.2594	441027	TMEM150C	transmembrane protein 150C [Source:HGNC Symbol;Acc:HGNC:37263]	4	82483170	82562357	-1
ENSG00000196781	1.17455	2.25722	5.21566	18.0567	2.16e-14	3.29e-13	22.4406	7088	TLE1	transducin like enhancer of split 1 [Source:HGNC Symbol;Acc:HGNC:11837]	9	81583683	81689305	-1
ENSG00000254979	1.17908	2.26432	3.6445	16.3176	1.63e-13	1.99e-12	20.6669		RP11-872D17.8		11	57387365	57424059	-1
ENSG00000258986	1.17915	2.26444	0.649401	6.44093	2.06e-06	5.78e-06	4.56547	388021	TMEM179	transmembrane protein 179 [Source:HGNC Symbol;Acc:HGNC:20137]	14	104474678	104605647	-1
ENSG00000228526	1.17937	2.26478	3.67157	11.5834	1.17e-10	7.42e-10	13.8498	407040 106614088	MIR34A	microRNA 34a [Source:HGNC Symbol;Acc:HGNC:31635]	1	9148011	9196983	-1
ENSG00000166900	1.17946	2.26492	4.2397	15.4144	4.99e-13	5.42e-12	19.3733	6809	STX3	syntaxin 3 [Source:HGNC Symbol;Acc:HGNC:11438]	11	59755059	59805882	1
ENSG00000170571	1.1801	2.26593	5.35737	26.6104	7.89e-18	3.2e-16	30.6299	133418	EMB	embigin [Source:HGNC Symbol;Acc:HGNC:30465]	5	50396192	50443248	-1
ENSG00000279117	1.18028	2.26621	4.63547	21.2843	7.77e-16	1.74e-14	25.9939		CTD-2562J17.6		11	75260129	75262466	-1
ENSG00000184304	1.18103	2.26739	3.94425	17.4595	4.24e-14	5.97e-13	21.9927	5587	PRKD1	protein kinase D1 [Source:HGNC Symbol;Acc:HGNC:9407]	14	29576479	30191898	-1
ENSG00000230530	1.18148	2.26809	3.92145	21.5438	6.07e-16	1.4e-14	26.3848		LIMD1-AS1	LIMD1 antisense RNA 1 [Source:HGNC Symbol;Acc:HGNC:44107]	3	45679043	45689134	-1
ENSG00000164741	1.18273	2.27005	6.42727	15.8765	2.79e-13	3.22e-12	19.6269	10395	DLC1	DLC1 Rho GTPase activating protein [Source:HGNC Symbol;Acc:HGNC:2897]	8	13083361	13604610	-1
ENSG00000138193	1.18322	2.27084	3.82617	16.2442	1.78e-13	2.14e-12	20.5346	51196	PLCE1	phospholipase C epsilon 1 [Source:HGNC Symbol;Acc:HGNC:17175]	10	94030812	94332823	1
ENSG00000156298	1.18366	2.27152	1.35824	7.34686	2.88e-07	9.41e-07	6.40026	7102	TSPAN7	tetraspanin 7 [Source:HGNC Symbol;Acc:HGNC:11854]	X	38561370	38688920	1
ENSG00000102452	1.18609	2.27536	2.14267	8.12243	5.82e-08	2.15e-07	7.83799	259232	NALCN	sodium leak channel, non-selective [Source:HGNC Symbol;Acc:HGNC:19082]	13	101053776	101416492	-1
ENSG00000147642	1.18645	2.27592	0.685749	6.72076	1.11e-06	3.27e-06	5.18595	55638	SYBU	syntabulin [Source:HGNC Symbol;Acc:HGNC:26011]	8	109573978	109691791	-1
ENSG00000127311	1.18715	2.27702	4.28442	20.2117	2.22e-15	4.33e-14	24.9727	92797	HELB	DNA helicase B [Source:HGNC Symbol;Acc:HGNC:17196]	12	66302545	66347645	1
ENSG00000118094	1.18789	2.27819	3.78571	16.1075	2.1e-13	2.49e-12	20.3707	11181	TREH	trehalase [Source:HGNC Symbol;Acc:HGNC:12266]	11	118657316	118679690	-1
ENSG00000134291	1.18917	2.28022	5.83352	28.0041	2.74e-18	1.26e-16	31.6675	79022	TMEM106C	transmembrane protein 106C [Source:HGNC Symbol;Acc:HGNC:28775]	12	47963569	47968878	1
ENSG00000230606	1.18942	2.28061	0.601462	7.68901	1.41e-07	4.85e-07	7.30262		AC159540.1		2	97416165	97433527	-1
ENSG00000172426	1.19049	2.28231	5.02648	22.7079	2.07e-16	5.5e-15	27.2963	221421	RSPH9	radial spoke head 9 homolog [Source:HGNC Symbol;Acc:HGNC:21057]	6	43645046	43672599	1
ENSG00000057294	1.19187	2.28448	1.80751	7.80652	1.11e-07	3.88e-07	7.26649	5318	PKP2	plakophilin 2 [Source:HGNC Symbol;Acc:HGNC:9024]	12	32790745	32896840	-1
ENSG00000080618	1.19239	2.28531	0.972326	7.59618	1.71e-07	5.8e-07	7.02559	1361	CPB2	carboxypeptidase B2 [Source:HGNC Symbol;Acc:HGNC:2300]	13	46053186	46105076	-1
ENSG00000137936	1.19369	2.28736	6.05674	24.1236	5.98e-17	1.85e-15	28.4468	8412	BCAR3	breast cancer anti-estrogen resistance 3 [Source:HGNC Symbol;Acc:HGNC:973]	1	93561786	93847150	-1
ENSG00000077616	1.19435	2.28841	4.77665	20.3217	1.99e-15	3.95e-14	24.9928	10003	NAALAD2	N-acetylated alpha-linked acidic dipeptidase 2 [Source:HGNC Symbol;Acc:HGNC:14526]	11	90131515	90192894	1
ENSG00000100505	1.19493	2.28933	6.33197	25.2916	2.26e-17	8.17e-16	29.4324	114088	TRIM9	tripartite motif containing 9 [Source:HGNC Symbol;Acc:HGNC:16288]	14	50975262	51096061	-1
ENSG00000137393	1.19577	2.29067	0.413394	5.31641	2.73e-05	6.39e-05	2.01029	255488	RNF144B	ring finger protein 144B [Source:HGNC Symbol;Acc:HGNC:21578]	6	18387350	18468874	1
ENSG00000162511	1.19625	2.29144	0.466926	5.89917	7.02e-06	1.81e-05	3.3653	7805	LAPTM5	lysosomal protein transmembrane 5 [Source:HGNC Symbol;Acc:HGNC:29612]	1	30732469	30757820	-1
ENSG00000270419	1.19626	2.29144	1.04305	8.69742	1.87e-08	7.6e-08	9.26426	100526820	CAHM	colon adenocarcinoma hypermethylated (non-protein coding) [Source:HGNC Symbol;Acc:HGNC:42860]	6	163413065	163413960	-1
ENSG00000169247	1.19711	2.29281	5.48441	16.9102	8.01e-14	1.06e-12	21.0377	79628	SH3TC2	SH3 domain and tetratricopeptide repeats 2 [Source:HGNC Symbol;Acc:HGNC:29427]	5	148923639	149063163	-1
ENSG00000257113	1.19751	2.29344	0.730256	6.93857	6.9e-07	2.11e-06	5.6588		RP11-274M17.2		12	74274952	74275231	1
ENSG00000196547	1.20173	2.30015	4.81079	21.4368	6.72e-16	1.53e-14	26.1133	4122	MAN2A2	mannosidase alpha class 2A member 2 [Source:HGNC Symbol;Acc:HGNC:6825]	15	90902218	90922584	1
[truncated: 796 more rows]
