# Supplementary material for: CD146-assisted isolation and multi-omics characterisation of human pluripotent stem cell derived cranial Schwann cell precursor-like cells.
Source: Research Square preprint supplement (doi:10.21203/rs.3.rs-3324198/v1), 2023-09-19
Supplement: Supplementary file 5 [file 3058da9c1530567cf669f0c4.xlsx]

## Sheet: LFQ_PersProc_MQ_Final_neg_pos_t
#	Neg1	Neg2	Neg3	Neg4	Pos1	Pos2	Pos3	Pos4	Only identified by site	Reverse	Potential contaminant	Student's T-test Significant Pos	Student's T-test significant	Protein Group IDs	MinusLog10Pval	FDR	logFC	Student's T-test Test statistic Pos	Protein IDs	Majority protein IDs	Protein names	Gene names	Fasta headers	ENSG	ENSP	UniProt names	Significant_Proteins	Significant_logFC	Reg_Prt_fdr_fc
1	24.4105	24.3779	24.0332	24.5097	21.402	19.9153	21.9242	21.0006	NA	NA	NA	+	Pos	3388	3.52505	0	-3.27232	-1.34196	Q5TGY3	Q5TGY3	AT-hook DNA-binding motif-containing protein 1	AHDC1	>sp|Q5TGY3|AHDC1_HUMAN AT-hook DNA-binding motif-containing protein 1 OS=Homo sapiens GN=AHDC1 PE=1 SV=1	ENSG00000126705	ENSP00000247087;ENSP00000363123;ENSP00000384021	AHDC1_HUMAN	FDR < 0.01	logFC > 2.0	REGULATED and logFC > 2.0
2	27.9248	28.1648	28.2919	28.2465	22.9184	23.1763	23.4248	23.5622	NA	NA	NA	+	Pos	2915	7.02682	0	-4.88657	-2.25835	Q09666;E9PQE3;E9PJZ0;E9PKR9;E9PJC6;E9PLK4	Q09666	Neuroblast differentiation-associated protein AHNAK	AHNAK	>sp|Q09666|AHNK_HUMAN Neuroblast differentiation-associated protein AHNAK OS=Homo sapiens GN=AHNAK PE=1 SV=2	ENSG00000124942	ENSP00000257247;ENSP00000367263	AHNK_HUMAN	FDR < 0.01	logFC > 2.0	REGULATED and logFC > 2.0
3	26.1783	25.7882	25.3816	26.0502	23.9753	23.1968	23.5063	23.673	NA	NA	NA	+	Pos	2875	4.09638	0	-2.26175	-1.00996	Q04828;A0A0A0MT30;P52895;S4R3P0;A6NHU4;H0Y804;B4DK69;A0A0A0MSD5;S4R3D5;S4R3Z2;A0A0A0MSS8;P42330;P17516	Q04828;A0A0A0MT30;P52895;S4R3P0;A6NHU4;H0Y804;B4DK69;A0A0A0MSD5	Aldo-keto reductase family 1 member C1;Aldo-keto reductase family 1 member C2	AKR1C1;AKR1C2	>sp|Q04828|AK1C1_HUMAN Aldo-keto reductase family 1 member C1 OS=Homo sapiens GN=AKR1C1 PE=1 SV=1;>tr|A0A0A0MT30|A0A0A0MT30_HUMAN Aldo-keto reductase family 1 member C1 OS=Homo sapiens GN=AKR1C1 PE=1 SV=1;>sp|P52895|AK1C2_HUMAN Aldo-keto reductase family 1	ENSG00000151632;ENSG00000187134;ENSG00000265231;ENSG00000266592	ENSP00000370129;ENSP00000370240;ENSP00000370254;ENSP00000385221;ENSP00000392694;ENSP00000408440;ENSP00000412248;ENSP00000416415;ENSP00000462069;ENSP00000462940;ENSP00000462966;ENSP00000463185;ENSP00000464045	A6NHU4_HUMAN;AK1C1_HUMAN;AK1C2_HUMAN;B4DK69_HUMAN;H0Y804_HUMAN	FDR < 0.01	logFC > 2.0	REGULATED and logFC > 2.0
4	23.2407	23.453	23.3774	23.4416	21.0987	21.0081	21.3427	21.6274	NA	NA	NA	+	Pos	1875	5.1433	0	-2.10896	-0.982267	P05186;B1ANL0;REV__Q86WI3	P05186	Alkaline phosphatase, tissue-nonspecific isozyme	ALPL	>sp|P05186|PPBT_HUMAN Alkaline phosphatase, tissue-nonspecific isozyme OS=Homo sapiens GN=ALPL PE=1 SV=4	ENSG00000162551	ENSP00000363965;ENSP00000363973;ENSP00000394765;ENSP00000437674;ENSP00000442672	PPBT_HUMAN	FDR < 0.01	logFC > 2.0	REGULATED and logFC > 2.0
5	23.565	23.513	23.4471	23.5186	21.0211	20.8259	20.3722	20.5656	NA	NA	NA	+	Pos	2476	5.92138	0	-2.81474	-1.31238	P49418;H0Y7T8	P49418;H0Y7T8	Amphiphysin	AMPH	>sp|P49418|AMPH_HUMAN Amphiphysin OS=Homo sapiens GN=AMPH PE=1 SV=1;>tr|H0Y7T8|H0Y7T8_HUMAN Amphiphysin (Fragment) OS=Homo sapiens GN=AMPH PE=1 SV=1	ENSG00000078053	ENSP00000317441;ENSP00000348602;ENSP00000415085	AMPH_HUMAN;H0Y7T8_HUMAN	FDR < 0.01	logFC > 2.0	REGULATED and logFC > 2.0
6	25.5538	25.5052	24.7689	25.612	22.227	23.1654	22.9086	23.3411	NA	NA	NA	+	Pos	1850	3.62491	0	-2.44944	-1.05818	P02649;H0Y7L5;E9PEV4;E7ERP7;CON__Q03247	P02649;H0Y7L5;E9PEV4;E7ERP7	Apolipoprotein E	APOE	>sp|P02649|APOE_HUMAN Apolipoprotein E OS=Homo sapiens GN=APOE PE=1 SV=1;>tr|H0Y7L5|H0Y7L5_HUMAN Apolipoprotein E (Fragment) OS=Homo sapiens GN=APOE PE=1 SV=2;>tr|E9PEV4|E9PEV4_HUMAN Apolipoprotein E (Fragment) OS=Homo sapiens GN=APOE PE=1 SV=1;>tr|E7ERP7|	ENSG00000130203	ENSP00000252486;ENSP00000410423;ENSP00000413135;ENSP00000413653	APOE_HUMAN;E7ERP7_HUMAN;E9PEV4_HUMAN;H0Y7L5_HUMAN	FDR < 0.01	logFC > 2.0	REGULATED and logFC > 2.0
7	22.1603	22.5693	22.3058	22.1358	25.9708	25.6746	25.3941	25.2296	NA	NA	NA	+	Pos	4109	5.60005	0	3.27449	1.4946	Q96P48;E7EU13;A0A0A0MSJ2;F5GWN4;F8WBT0;F5GWQ2;H0YGD1	Q96P48;E7EU13;A0A0A0MSJ2	Arf-GAP with Rho-GAP domain, ANK repeat and PH domain-containing protein 1	ARAP1	>sp|Q96P48|ARAP1_HUMAN Arf-GAP with Rho-GAP domain, ANK repeat and PH domain-containing protein 1 OS=Homo sapiens GN=ARAP1 PE=1 SV=3;>tr|E7EU13|E7EU13_HUMAN Arf-GAP with Rho-GAP domain, ANK repeat and PH domain-containing protein 1 OS=Homo sapiens GN=ARAP1	ENSG00000186635	ENSP00000335506;ENSP00000352332;ENSP00000377230;ENSP00000377233;ENSP00000390461;ENSP00000392264;ENSP00000403127	ARAP1_HUMAN;E7EU13_HUMAN	FDR < 0.01	logFC > 2.0	REGULATED and logFC > 2.0
8	19.7976	21.5064	20.0743	21.1089	24.8106	24.1338	21.4405	24.1402	NA	NA	NA	+	Pos	4645	1.90999	0	3.00949	1.05541	Q9NWB6	Q9NWB6	Arginine and glutamate-rich protein 1	ARGLU1	>sp|Q9NWB6|ARGL1_HUMAN Arginine and glutamate-rich protein 1 OS=Homo sapiens GN=ARGLU1 PE=1 SV=1	ENSG00000134884	ENSP00000365092;ENSP00000383059	ARGL1_HUMAN	FDR < 0.01	logFC > 2.0	REGULATED and logFC > 2.0
9	22.0719	20.3578	23.1154	19.9806	23.7135	23.3276	23.2661	23.9195	NA	NA	NA	+	Pos	622	1.55902	0.00836036	2.17527	0.790418	C9JJX6;E9PDC3;O00192	C9JJX6;E9PDC3;O00192	Armadillo repeat protein deleted in velo-cardio-facial syndrome	ARVCF	>tr|C9JJX6|C9JJX6_HUMAN Armadillo repeat protein deleted in velo-cardio-facial syndrome OS=Homo sapiens GN=ARVCF PE=1 SV=1;>tr|E9PDC3|E9PDC3_HUMAN Armadillo repeat protein deleted in velo-cardio-facial syndrome OS=Homo sapiens GN=ARVCF PE=1 SV=1;>sp|O00192	ENSG00000099889	ENSP00000263207;ENSP00000342042;ENSP00000384341;ENSP00000384732;ENSP00000385444	ARVC_HUMAN;C9JJX6_HUMAN;E9PDC3_HUMAN	FDR < 0.01	logFC > 2.0	REGULATED and logFC > 2.0
10	25.7535	25.5952	25.6024	25.881	21.0971	20.3089	22.5705	20.958	NA	NA	NA	+	Pos	1843	4.0515	0	-4.47441	-1.80244	P00966;Q5T6L6;Q5T6L5	P00966;Q5T6L6	Argininosuccinate synthase	ASS1	>sp|P00966|ASSY_HUMAN Argininosuccinate synthase OS=Homo sapiens GN=ASS1 PE=1 SV=2;>tr|Q5T6L6|Q5T6L6_HUMAN Argininosuccinate synthase (Fragment) OS=Homo sapiens GN=ASS1 PE=1 SV=1	ENSG00000130707	ENSP00000253004;ENSP00000361469;ENSP00000361470;ENSP00000361471;ENSP00000394212	ASSY_HUMAN;Q5T6L6_HUMAN	FDR < 0.01	logFC > 2.0	REGULATED and logFC > 2.0
11	22.1957	22.1223	20.8254	22.0228	23.6543	24.473	24.1969	24.4454	NA	NA	NA	+	Pos	4421	3.16168	0	2.40086	1.01068	Q9H425;E5RFY9;E5RI90	Q9H425;E5RFY9	Uncharacterized protein C1orf198	C1orf198	>sp|Q9H425|CA198_HUMAN Uncharacterized protein C1orf198 OS=Homo sapiens GN=C1orf198 PE=1 SV=1;>tr|E5RFY9|E5RFY9_HUMAN Uncharacterized protein C1orf198 OS=Homo sapiens GN=C1orf198 PE=1 SV=1	ENSG00000119280	ENSP00000355623;ENSP00000411384;ENSP00000430967	CA198_HUMAN;E5RFY9_HUMAN	FDR < 0.01	logFC > 2.0	REGULATED and logFC > 2.0
12	20.7787	20.1147	20.9488	21.2293	23.114	23.881	23.734	23.4251	NA	NA	NA	+	Pos	2303	4.11005	0	2.77062	1.20898	P35219	P35219	Carbonic anhydrase-related protein	CA8	>sp|P35219|CAH8_HUMAN Carbonic anhydrase-related protein OS=Homo sapiens GN=CA8 PE=1 SV=3	ENSG00000178538	ENSP00000314407	CAH8_HUMAN	FDR < 0.01	logFC > 2.0	REGULATED and logFC > 2.0
13	20.2134	22.0022	19.2567	20.7548	22.8546	22.9462	23.0631	23.3249	NA	NA	NA	+	Pos	3778	2.28395	0	2.4904	0.964617	Q8NFZ8	Q8NFZ8	Cell adhesion molecule 4	CADM4	>sp|Q8NFZ8|CADM4_HUMAN Cell adhesion molecule 4 OS=Homo sapiens GN=CADM4 PE=1 SV=1	ENSG00000105767	ENSP00000222374	CADM4_HUMAN	FDR < 0.01	logFC > 2.0	REGULATED and logFC > 2.0
14	24.2315	24.0759	24.0795	23.9659	22.2175	20.9271	22.1587	20.6407	NA	NA	NA	+	Pos	1217	3.12589	0	-2.60223	-1.07827	H3BUU9;P55287	H3BUU9;P55287	Cadherin-11	CDH11	>tr|H3BUU9|H3BUU9_HUMAN Cadherin-11 OS=Homo sapiens GN=CDH11 PE=1 SV=1;>sp|P55287|CAD11_HUMAN Cadherin-11 OS=Homo sapiens GN=CDH11 PE=2 SV=2	ENSG00000140937	ENSP00000268603;ENSP00000377711;ENSP00000457812	CAD11_HUMAN;H3BUU9_HUMAN	FDR < 0.01	logFC > 2.0	REGULATED and logFC > 2.0
15	20.7928	22.135	22.1228	22.0208	23.6942	24.0445	24.9263	24.4546	NA	NA	NA	+	Pos	2624	3.00552	0	2.51203	1.0378	P55285;D6RF86	P55285;D6RF86	Cadherin-6	CDH6	>sp|P55285|CADH6_HUMAN Cadherin-6 OS=Homo sapiens GN=CDH6 PE=1 SV=1;>tr|D6RF86|D6RF86_HUMAN Cadherin-6 OS=Homo sapiens GN=CDH6 PE=1 SV=1	ENSG00000113361	ENSP00000265071;ENSP00000424843	CADH6_HUMAN;D6RF86_HUMAN	FDR < 0.01	logFC > 2.0	REGULATED and logFC > 2.0
16	22.8755	23.1004	22.7723	22.6686	26.6938	26.9211	27.0269	27.1975	NA	NA	NA	+	Pos	365	6.98071	0	4.10559	1.91843	E9PC62;A0A0J9YXJ0;Q5VZZ6;A0A0J9YX66;O95319;V9GYD9;V9GY47;A0A0J9YXK1	E9PC62;A0A0J9YXJ0;Q5VZZ6;A0A0J9YX66;O95319;V9GYD9	CUGBP Elav-like family member 2	CELF2	>tr|E9PC62|E9PC62_HUMAN CUGBP Elav-like family member 2 OS=Homo sapiens GN=CELF2 PE=1 SV=1;>tr|A0A0J9YXJ0|A0A0J9YXJ0_HUMAN CUGBP Elav-like family member 2 OS=Homo sapiens GN=CELF2 PE=1 SV=1;>tr|Q5VZZ6|Q5VZZ6_HUMAN CUGBP Elav-like family member 2 OS=Homo sa	ENSG00000048740	ENSP00000315328;ENSP00000346426;ENSP00000346971;ENSP00000368563;ENSP00000382743;ENSP00000388530;ENSP00000389951;ENSP00000404834;ENSP00000406451;ENSP00000443926	CELF2_HUMAN;E9PC62_HUMAN;Q5VZZ6_HUMAN	FDR < 0.01	logFC > 2.0	REGULATED and logFC > 2.0
17	22.788	22.9549	22.7245	22.9342	20.2527	21.1025	20.5676	20.5361	NA	NA	NA	+	Pos	4781	4.69656	0	-2.23566	-1.02272	Q9UDT6	Q9UDT6	CAP-Gly domain-containing linker protein 2	CLIP2	>sp|Q9UDT6|CLIP2_HUMAN CAP-Gly domain-containing linker protein 2 OS=Homo sapiens GN=CLIP2 PE=1 SV=1	ENSG00000106665;ENSG00000263226	ENSP00000223398;ENSP00000355151;ENSP00000378500;ENSP00000460103;ENSP00000460322;ENSP00000461219	CLIP2_HUMAN	FDR < 0.01	logFC > 2.0	REGULATED and logFC > 2.0
18	22.2084	22.9079	23.0686	24.0614	21.6305	21.5382	19.8095	20.3249	NA	NA	NA	+	Pos	1981	2.03907	0.001375	-2.2358	-0.862948	P10909;H0YAS8;E7ERK6;H0YC35;H0YLK8;E5RG36;E5RGB0;E5RH61;E5RJZ5;E7ETB4	P10909;H0YAS8;E7ERK6;H0YC35;H0YLK8	Clusterin;Clusterin beta chain;Clusterin alpha chain;Clusterin	CLU	>sp|P10909|CLUS_HUMAN Clusterin OS=Homo sapiens GN=CLU PE=1 SV=1;>tr|H0YAS8|H0YAS8_HUMAN Clusterin (Fragment) OS=Homo sapiens GN=CLU PE=1 SV=1;>tr|E7ERK6|E7ERK6_HUMAN Clusterin (Fragment) OS=Homo sapiens GN=CLU PE=1 SV=1;>tr|H0YC35|H0YC35_HUMAN Clusterin (	ENSG00000120885	ENSP00000315130;ENSP00000385419;ENSP00000428033;ENSP00000429336;ENSP00000429620;ENSP00000430821;ENSP00000446413;ENSP00000453247;ENSP00000453939	CLUS_HUMAN;E7ERK6_HUMAN;H0YAS8_HUMAN;H0YC35_HUMAN;H0YLK8_HUMAN	FDR < 0.01	logFC > 2.0	REGULATED and logFC > 2.0
19	20.0912	20.4795	20.3229	20.7219	22.6893	23.0823	23.1277	23.5878	NA	NA	NA	+	Pos	4030	4.6896	0	2.71793	1.22059	Q96F85;B8ZZB8	Q96F85;B8ZZB8	CB1 cannabinoid receptor-interacting protein 1	CNRIP1	>sp|Q96F85|CNRP1_HUMAN CB1 cannabinoid receptor-interacting protein 1 OS=Homo sapiens GN=CNRIP1 PE=1 SV=1;>tr|B8ZZB8|B8ZZB8_HUMAN CB1 cannabinoid receptor-interacting protein 1 OS=Homo sapiens GN=CNRIP1 PE=1 SV=1	ENSG00000119865	ENSP00000263655;ENSP00000386544;ENSP00000386883	B8ZZB8_HUMAN;CNRP1_HUMAN	FDR < 0.01	logFC > 2.0	REGULATED and logFC > 2.0
20	25.0059	25.3052	26.6538	25.2231	22.5925	20.288	20.1727	20.9185	NA	NA	NA	+	Pos	2357	3.29794	0	-4.55404	-1.70452	P39060;H7BXV5;H7C457	P39060;H7BXV5;H7C457	Collagen alpha-1(XVIII) chain;Endostatin	COL18A1	>sp|P39060|COIA1_HUMAN Collagen alpha-1(XVIII) chain OS=Homo sapiens GN=COL18A1 PE=1 SV=5;>tr|H7BXV5|H7BXV5_HUMAN Collagen alpha-1(XVIII) chain (Fragment) OS=Homo sapiens GN=COL18A1 PE=1 SV=1;>tr|H7C457|H7C457_HUMAN Collagen alpha-1(XVIII) chain (Fragment)	ENSG00000182871	ENSP00000339118;ENSP00000347665;ENSP00000352798;ENSP00000383191;ENSP00000415692	COIA1_HUMAN;H7BXV5_HUMAN;H7C457_HUMAN	FDR < 0.01	logFC > 2.0	REGULATED and logFC > 2.0
21	23.9148	23.8993	23.3231	23.129	22.1487	20.5818	20.4884	20.5546	NA	NA	NA	+	Pos	4147	2.95271	0	-2.62316	-1.0709	Q96SM3	Q96SM3	Probable carboxypeptidase X1	CPXM1	>sp|Q96SM3|CPXM1_HUMAN Probable carboxypeptidase X1 OS=Homo sapiens GN=CPXM1 PE=2 SV=2	ENSG00000088882	ENSP00000369979	CPXM1_HUMAN	FDR < 0.01	logFC > 2.0	REGULATED and logFC > 2.0
22	26.8471	26.3539	26.8754	27.2239	24.1361	24.7022	24.301	24.8246	NA	NA	NA	+	Pos	2242	4.14896	0	-2.33407	-1.04112	P29762;B5MCB5	P29762;B5MCB5	Cellular retinoic acid-binding protein 1	CRABP1	>sp|P29762|RABP1_HUMAN Cellular retinoic acid-binding protein 1 OS=Homo sapiens GN=CRABP1 PE=1 SV=2;>tr|B5MCB5|B5MCB5_HUMAN Cellular retinoic acid-binding protein 1 (Fragment) OS=Homo sapiens GN=CRABP1 PE=1 SV=2	ENSG00000166426	ENSP00000299529;ENSP00000385978	B5MCB5_HUMAN;RABP1_HUMAN	FDR < 0.01	logFC > 2.0	REGULATED and logFC > 2.0
23	20.9684	21.8553	21.9557	20.5828	24.3163	24.1697	24.2479	24.1315	NA	NA	NA	+	Pos	4958	3.83573	0	2.87581	1.22967	Q9Y2S2;A0A087WW38	Q9Y2S2	Lambda-crystallin homolog	CRYL1	>sp|Q9Y2S2|CRYL1_HUMAN Lambda-crystallin homolog OS=Homo sapiens GN=CRYL1 PE=1 SV=3	ENSG00000165475	ENSP00000298248;ENSP00000372262	CRYL1_HUMAN	FDR < 0.01	logFC > 2.0	REGULATED and logFC > 2.0
24	24.9635	24.3668	24.6083	24.6984	20.8299	20.7382	20.8559	21.1923	NA	NA	NA	+	Pos	995	6.43425	0	-3.75516	-1.7399	F8VQR7;Q16527;F8VW96	F8VQR7;Q16527;F8VW96	Cysteine and glycine-rich protein 2	CSRP2	>tr|F8VQR7|F8VQR7_HUMAN Cysteine and glycine-rich protein 2 OS=Homo sapiens GN=CSRP2 PE=1 SV=1;>sp|Q16527|CSRP2_HUMAN Cysteine and glycine-rich protein 2 OS=Homo sapiens GN=CSRP2 PE=1 SV=3;>tr|F8VW96|F8VW96_HUMAN Cysteine and glycine-rich protein 2 OS=Homo	ENSG00000175183	ENSP00000310901;ENSP00000449824;ENSP00000450056;ENSP00000450143	CSRP2_HUMAN;F8VQR7_HUMAN;F8VW96_HUMAN	FDR < 0.01	logFC > 2.0	REGULATED and logFC > 2.0
25	26.9002	26.7846	27.0209	27.139	24.6526	24.7234	24.7119	24.9942	NA	NA	NA	+	Pos	1917	6.03281	0	-2.19067	-1.03927	P07858;R4GMQ5;E9PR54;E9PJ67;E9PCB3;E9PKQ7;E9PNL5;E9PHZ5;E9PLY3;E9PSG5;E9PQM1;E9PS78	P07858	Cathepsin B;Cathepsin B light chain;Cathepsin B heavy chain	CTSB	>sp|P07858|CATB_HUMAN Cathepsin B OS=Homo sapiens GN=CTSB PE=1 SV=3	ENSG00000164733	ENSP00000342070;ENSP00000345672;ENSP00000409917;ENSP00000415889;ENSP00000432244;ENSP00000433215;ENSP00000434217;ENSP00000435105	CATB_HUMAN	FDR < 0.01	logFC > 2.0	REGULATED and logFC > 2.0
26	24.3828	24.2342	24.3191	24.7124	21.7547	20.1667	20.5585	19.3128	NA	NA	NA	+	Pos	2787	3.58518	0	-3.96395	-1.57429	P78310	P78310	Coxsackievirus and adenovirus receptor	CXADR	>sp|P78310|CXAR_HUMAN Coxsackievirus and adenovirus receptor OS=Homo sapiens GN=CXADR PE=1 SV=1	ENSG00000154639	ENSP00000284878;ENSP00000348620;ENSP00000383029;ENSP00000383030	CXAR_HUMAN	FDR < 0.01	logFC > 2.0	REGULATED and logFC > 2.0
27	20.6941	20.6688	20.6655	20.2665	22.9973	22.6238	22.4148	22.2845	NA	NA	NA	+	Pos	3985	4.41996	0.00110345	2.00634	0.917644	Q96BY6;F8WE73;H0YFC5;A0A0A0MT38;A0A088AWN3;A0A0A0MSY4;A0A0A0MRA7;Q9BZ29	Q96BY6	Dedicator of cytokinesis protein 10	DOCK10	>sp|Q96BY6|DOC10_HUMAN Dedicator of cytokinesis protein 10 OS=Homo sapiens GN=DOCK10 PE=1 SV=3	ENSG00000135905	ENSP00000258390	DOC10_HUMAN	FDR < 0.01	logFC > 2.0	REGULATED and logFC > 2.0
28	24.8342	25.2299	27.0511	24.8536	22.6786	21.3359	20.9443	22.629	NA	NA	NA	+	Pos	2063	2.70095	0	-3.59525	-1.33664	P15924	P15924	Desmoplakin	DSP	>sp|P15924|DESP_HUMAN Desmoplakin OS=Homo sapiens GN=DSP PE=1 SV=3	ENSG00000096696	ENSP00000369129;ENSP00000396591	DESP_HUMAN	FDR < 0.01	logFC > 2.0	REGULATED and logFC > 2.0
29	22.9498	23.3346	22.9011	23.5374	20.7815	20.2537	21.1813	21.6725	NA	NA	NA	+	Pos	1882	3.21348	0	-2.20848	-0.944694	S4R3A2;S4R371;P05413	S4R3A2;S4R371;P05413	Fatty acid-binding protein, heart	FABP3	>tr|S4R3A2|S4R3A2_HUMAN Fatty acid-binding protein, heart OS=Homo sapiens GN=FABP3 PE=1 SV=1;>tr|S4R371|S4R371_HUMAN Fatty acid-binding protein, heart (Fragment) OS=Homo sapiens GN=FABP3 PE=1 SV=1;>sp|P05413|FABPH_HUMAN Fatty acid-binding protein, heart OS	ENSG00000121769	ENSP00000362817	FABPH_HUMAN	FDR < 0.01	logFC > 2.0	REGULATED and logFC > 2.0
30	20.0715	20.8704	20.0492	20.08	23.4715	23.1452	23.0679	23.0069	NA	NA	NA	+	Pos	3459	4.8652	0	2.90512	1.30506	Q6P2I3	Q6P2I3	Fumarylacetoacetate hydrolase domain-containing protein 2B	FAHD2B	>sp|Q6P2I3|FAH2B_HUMAN Fumarylacetoacetate hydrolase domain-containing protein 2B OS=Homo sapiens GN=FAHD2B PE=1 SV=1	ENSG00000144199	ENSP00000272610;ENSP00000410470;ENSP00000444599	FAH2B_HUMAN	FDR < 0.01	logFC > 2.0	REGULATED and logFC > 2.0
31	29.6386	30.4973	29.6226	30.7927	30.0308	21.0014	21.3596	20.8896	NA	NA	NA	+	Pos	1076	1.62972	0	-6.81746	-1.60074	G3XAE9;Q9Y4F4	G3XAE9;Q9Y4F4	Protein FAM179B	FAM179B	>tr|G3XAE9|G3XAE9_HUMAN KIAA0423, isoform CRA_a OS=Homo sapiens GN=FAM179B PE=1 SV=1;>sp|Q9Y4F4|F179B_HUMAN Protein FAM179B OS=Homo sapiens GN=FAM179B PE=1 SV=4	ENSG00000198718	ENSP00000354917;ENSP00000355045;ENSP00000371668;ENSP00000451829	F179B_HUMAN;G3XAE9_HUMAN	FDR < 0.01	logFC > 2.0	REGULATED and logFC > 2.0
32	24.8224	25.0026	25.3124	25.3144	21.8211	20.5522	21.5026	20.8383	NA	NA	NA	+	Pos	3077	4.78011	0	-3.93437	-1.69832	Q14315	Q14315	Filamin-C	FLNC	>sp|Q14315|FLNC_HUMAN Filamin-C OS=Homo sapiens GN=FLNC PE=1 SV=3	ENSG00000128591	ENSP00000327145;ENSP00000344002	FLNC_HUMAN	FDR < 0.01	logFC > 2.0	REGULATED and logFC > 2.0
33	22.0506	20.024	21.7795	21.8775	23.952	23.6917	23.884	24.0118	NA	NA	NA	+	Pos	4711	2.66583	0	2.45197	0.989481	Q9NZU0	Q9NZU0	Leucine-rich repeat transmembrane protein FLRT3	FLRT3	>sp|Q9NZU0|FLRT3_HUMAN Leucine-rich repeat transmembrane protein FLRT3 OS=Homo sapiens GN=FLRT3 PE=1 SV=1	ENSG00000125848	ENSP00000339912;ENSP00000367292	FLRT3_HUMAN	FDR < 0.01	logFC > 2.0	REGULATED and logFC > 2.0
34	19.8289	20.5413	21.1169	21.0752	20.451	23.9246	24.0206	24.2176	NA	NA	NA	+	Pos	1151	1.41448	0.00133333	2.51287	0.851359	H0YIV9;O43716;F8VRU3	H0YIV9;O43716	Glutamyl-tRNA(Gln) amidotransferase subunit C, mitochondrial	GATC	>tr|H0YIV9|H0YIV9_HUMAN Uncharacterized protein (Fragment) OS=Homo sapiens PE=3 SV=1;>sp|O43716|GATC_HUMAN Glutamyl-tRNA(Gln) amidotransferase subunit C, mitochondrial OS=Homo sapiens GN=GATC PE=1 SV=1	ENSG00000111780;ENSG00000257218	ENSP00000446872;ENSP00000450281	GATC_HUMAN;H0YIV9_HUMAN	FDR < 0.01	logFC > 2.0	REGULATED and logFC > 2.0
35	20.1592	20.8164	21.5668	20.9351	22.9596	22.8642	23.1727	23.1822	NA	NA	NA	+	Pos	2513	3.46426	0	2.17528	0.946183	P50440;H0YKW9;H0YMX4	P50440	Glycine amidinotransferase, mitochondrial	GATM	>sp|P50440|GATM_HUMAN Glycine amidinotransferase, mitochondrial OS=Homo sapiens GN=GATM PE=1 SV=1	ENSG00000171766	ENSP00000379895;ENSP00000454008	GATM_HUMAN	FDR < 0.01	logFC > 2.0	REGULATED and logFC > 2.0
36	22.4026	21.482	22.4447	20.8837	24.3121	24.0091	24.23	23.8609	NA	NA	NA	+	Pos	938	2.9629	0	2.29977	0.961319	F5GZ49;F5H0U5;Q9NZD2	F5GZ49;F5H0U5;Q9NZD2	Glycolipid transfer protein	GLTP	>tr|F5GZ49|F5GZ49_HUMAN Glycolipid transfer protein OS=Homo sapiens GN=GLTP PE=1 SV=1;>tr|F5H0U5|F5H0U5_HUMAN Glycolipid transfer protein OS=Homo sapiens GN=GLTP PE=1 SV=1;>sp|Q9NZD2|GLTP_HUMAN Glycolipid transfer protein OS=Homo sapiens GN=GLTP PE=1 SV=3	ENSG00000139433	ENSP00000315263;ENSP00000438128;ENSP00000441537;ENSP00000445919	F5GZ49_HUMAN;F5H0U5_HUMAN;GLTP_HUMAN	FDR < 0.01	logFC > 2.0	REGULATED and logFC > 2.0
37	24.5299	24.1401	24.0599	24.4561	22.2954	22.4477	21.9397	22.2433	NA	NA	NA	+	Pos	2301	4.92057	0	-2.06499	-0.957256	P35052;H7C410;H7BZL4;H7C024;H7BZE9	P35052;H7C410;H7BZL4	Glypican-1;Secreted glypican-1	GPC1	>sp|P35052|GPC1_HUMAN Glypican-1 OS=Homo sapiens GN=GPC1 PE=1 SV=2;>tr|H7C410|H7C410_HUMAN Glypican-1 OS=Homo sapiens GN=GPC1 PE=1 SV=2;>tr|H7BZL4|H7BZL4_HUMAN Glypican-1 (Fragment) OS=Homo sapiens GN=GPC1 PE=1 SV=1	ENSG00000063660	ENSP00000264039;ENSP00000390242;ENSP00000415077	GPC1_HUMAN;H7BZL4_HUMAN;H7C410_HUMAN	FDR < 0.01	logFC > 2.0	REGULATED and logFC > 2.0
38	25.4518	25.1422	25.3078	25.4047	20.1121	23.8637	23.8852	24.1912	NA	NA	NA	+	Pos	52	1.26119	0.0090087	-2.31355	-0.778377	A0A087WZG9;B4DSP0;A0A087WUL4;A0A087WX23;A0A087WXK2;Q86TG7;A0A087WYS2	A0A087WZG9;B4DSP0;A0A087WUL4;A0A087WX23;A0A087WXK2;Q86TG7	Retrotransposon-derived protein PEG10	hCG_1642748;PEG10	>tr|A0A087WZG9|A0A087WZG9_HUMAN Retrotransposon-derived protein PEG10 OS=Homo sapiens GN=PEG10 PE=1 SV=1;>tr|B4DSP0|B4DSP0_HUMAN HCG1642748, isoform CRA_b OS=Homo sapiens GN=PEG10 PE=1 SV=1;>tr|A0A087WUL4|A0A087WUL4_HUMAN Retrotransposon-derived protein PE	ENSG00000242265	ENSP00000417587;ENSP00000418944	B4DSP0_HUMAN;PEG10_HUMAN	FDR < 0.01	logFC > 2.0	REGULATED and logFC > 2.0
39	27.6921	27.2543	27.1556	28.6136	23.557	23.9098	24.075	24.9133	NA	NA	NA	+	Pos	1866	3.72372	0	-3.56514	-1.46128	P04792;F8WE04;C9J3N8	P04792;F8WE04	Heat shock protein beta-1	HSPB1	>sp|P04792|HSPB1_HUMAN Heat shock protein beta-1 OS=Homo sapiens GN=HSPB1 PE=1 SV=2;>tr|F8WE04|F8WE04_HUMAN Heat shock protein beta-1 OS=Homo sapiens GN=HSPB1 PE=1 SV=1	ENSG00000106211	ENSP00000248553;ENSP00000414357	F8WE04_HUMAN;HSPB1_HUMAN	FDR < 0.01	logFC > 2.0	REGULATED and logFC > 2.0
40	27.2492	27.8384	27.548	26.7759	26.4423	20.8922	21.1569	20.6053	NA	NA	NA	+	Pos	976	1.94237	0	-5.0787	-1.48837	F5H7S7;Q13576;E7EWC2;D6R939;E9PDT6	F5H7S7;Q13576;E7EWC2	Ras GTPase-activating-like protein IQGAP2	IQGAP2	>tr|F5H7S7|F5H7S7_HUMAN Ras GTPase-activating-like protein IQGAP2 OS=Homo sapiens GN=IQGAP2 PE=1 SV=2;>sp|Q13576|IQGA2_HUMAN Ras GTPase-activating-like protein IQGAP2 OS=Homo sapiens GN=IQGAP2 PE=1 SV=4;>tr|E7EWC2|E7EWC2_HUMAN Ras GTPase-activating-like pr	ENSG00000145703	ENSP00000274364;ENSP00000379535;ENSP00000421097;ENSP00000442313	E7EWC2_HUMAN;F5H7S7_HUMAN;IQGA2_HUMAN	FDR < 0.01	logFC > 2.0	REGULATED and logFC > 2.0
41	22.3467	21.1263	20.6455	20.6098	25.9185	26.485	26.3079	26.47	NA	NA	NA	+	Pos	2170	4.68962	0	5.11324	2.10719	P23229;C9JXX7;H7BZ97	P23229	Integrin alpha-6;Integrin alpha-6 heavy chain;Integrin alpha-6 light chain;Processed integrin alpha-6	ITGA6	>sp|P23229|ITA6_HUMAN Integrin alpha-6 OS=Homo sapiens GN=ITGA6 PE=1 SV=5	ENSG00000091409	ENSP00000264107;ENSP00000341078;ENSP00000364369;ENSP00000386614	ITA6_HUMAN	FDR < 0.01	logFC > 2.0	REGULATED and logFC > 2.0
42	21.1062	20.0987	20.1233	21.4604	26.1784	26.7153	26.7834	26.5893	NA	NA	NA	+	Pos	3377	5.38839	0	5.86948	2.47482	Q5T7N3;B1ALP6;B1ALP5	Q5T7N3	KN motif and ankyrin repeat domain-containing protein 4	KANK4	>sp|Q5T7N3|KANK4_HUMAN KN motif and ankyrin repeat domain-containing protein 4 OS=Homo sapiens GN=KANK4 PE=2 SV=1	ENSG00000132854	ENSP00000346352;ENSP00000360195	KANK4_HUMAN	FDR < 0.01	logFC > 2.0	REGULATED and logFC > 2.0
43	21.149	21.1229	21.5812	20.2165	24.2116	24.0083	24.9576	24.8654	NA	NA	NA	+	Pos	4000	4.08603	0	3.49333	1.47311	Q96CX2	Q96CX2	BTB/POZ domain-containing protein KCTD12	KCTD12	>sp|Q96CX2|KCD12_HUMAN BTB/POZ domain-containing protein KCTD12 OS=Homo sapiens GN=KCTD12 PE=1 SV=1	ENSG00000178695	ENSP00000317141;ENSP00000366694	KCD12_HUMAN	FDR < 0.01	logFC > 2.0	REGULATED and logFC > 2.0
44	23.7504	23.65	23.6657	24.2043	21.3595	20.7407	20.8103	20.9984	NA	NA	+	+	Pos	665	5.24167	0	-2.84037	-1.29667	CON__P05787;P05787;F8VUG2;F8W1U3;CON__H-INV:HIT000292931;F8VP67;CON__Q9DCV7;CON__Q3KNV1;CON__P08729;P08729;CON__H-INV:HIT000016045;H0YIB2	CON__P05787;P05787;F8VUG2;F8W1U3;CON__H-INV:HIT000292931	Keratin, type II cytoskeletal 8	KRT8	>P05787 SWISS-PROT:P05787 Tax_Id=9606 Gene_Symbol=KRT8 Keratin, type II cytoskeletal 8;>sp|P05787|K2C8_HUMAN Keratin, type II cytoskeletal 8 OS=Homo sapiens GN=KRT8 PE=1 SV=7;>tr|F8VUG2|F8VUG2_HUMAN Keratin, type II cytoskeletal 8 (Fragment) OS=Homo sapien	ENSG00000170421	ENSP00000293308;ENSP00000447040;ENSP00000447402;ENSP00000447566;ENSP00000447881;ENSP00000449404	F8VUG2_HUMAN;F8W1U3_HUMAN;K2C8_HUMAN	FDR < 0.01	logFC > 2.0	REGULATED and logFC > 2.0
45	23.3141	23.555	23.5216	23.9456	21.6998	21.0513	19.9606	20.8052	NA	NA	NA	+	Pos	2101	3.39378	0	-2.70482	-1.13503	P17931;G3V3R6	P17931	Galectin-3	LGALS3	>sp|P17931|LEG3_HUMAN Galectin-3 OS=Homo sapiens GN=LGALS3 PE=1 SV=5	ENSG00000131981	ENSP00000254301	LEG3_HUMAN	FDR < 0.01	logFC > 2.0	REGULATED and logFC > 2.0
46	23.9702	24.2466	24.3845	24.0508	21.5308	21.004	20.3975	24.174	NA	NA	NA	+	Pos	3385	1.53501	0.0024	-2.38642	-0.841095	Q5TCI8	Q5TCI8	NA	LMNA	>tr|Q5TCI8|Q5TCI8_HUMAN Prelamin-A/C OS=Homo sapiens GN=LMNA PE=1 SV=1	ENSG00000160789	ENSP00000357280;ENSP00000376164	Q5TCI8_HUMAN	FDR < 0.01	logFC > 2.0	REGULATED and logFC > 2.0
47	21.4744	20.1643	21.3064	21.2682	24.4454	23.9038	23.8108	23.5964	NA	NA	NA	+	Pos	2828	3.7648	0	2.88575	1.22801	P98164;E9PC35	P98164	Low-density lipoprotein receptor-related protein 2	LRP2	>sp|P98164|LRP2_HUMAN Low-density lipoprotein receptor-related protein 2 OS=Homo sapiens GN=LRP2 PE=1 SV=3	ENSG00000081479	ENSP00000263816	LRP2_HUMAN	FDR < 0.01	logFC > 2.0	REGULATED and logFC > 2.0
48	23.1265	23.4343	23.52	23.1778	20.6502	21.3032	21.1518	20.5583	NA	NA	NA	+	Pos	4784	4.60335	0	-2.39875	-1.08683	Q9UDY8;K7EP42	Q9UDY8	Mucosa-associated lymphoid tissue lymphoma translocation protein 1	MALT1	>sp|Q9UDY8|MALT1_HUMAN Mucosa-associated lymphoid tissue lymphoma translocation protein 1 OS=Homo sapiens GN=MALT1 PE=1 SV=1	ENSG00000172175	ENSP00000304161;ENSP00000319279	MALT1_HUMAN	FDR < 0.01	logFC > 2.0	REGULATED and logFC > 2.0
49	21.3253	20.1859	20.2649	20.2075	25.7186	26.1787	26.1365	26.1205	NA	NA	NA	+	Pos	2405	5.81549	0	5.54264	2.41293	P43121	P43121	Cell surface glycoprotein MUC18	MCAM	>sp|P43121|MUC18_HUMAN Cell surface glycoprotein MUC18 OS=Homo sapiens GN=MCAM PE=1 SV=2	ENSG00000076706	ENSP00000264036;ENSP00000376561	MUC18_HUMAN	FDR < 0.01	logFC > 2.0	REGULATED and logFC > 2.0
50	19.7777	21.4425	20.2737	21.5221	22.5482	22.9951	23.0119	23.4525	NA	NA	NA	+	Pos	4088	2.51266	0.00109091	2.24794	0.909895	Q96KG7	Q96KG7	Multiple epidermal growth factor-like domains protein 10	MEGF10	>sp|Q96KG7|MEG10_HUMAN Multiple epidermal growth factor-like domains protein 10 OS=Homo sapiens GN=MEGF10 PE=1 SV=1	ENSG00000145794	ENSP00000274473;ENSP00000416284;ENSP00000423195;ENSP00000423354	MEG10_HUMAN	FDR < 0.01	logFC > 2.0	REGULATED and logFC > 2.0
51	24.6388	24.5536	24.4993	24.3448	20.8692	22.2961	21.6775	22.7155	NA	NA	NA	+	Pos	646	3.18182	0	-2.61954	-1.08869	C9JW74;Q5EB52;C9JWU9;C9JSW2;R4GN52;C9JRA9;C9JCM6	C9JW74;Q5EB52;C9JWU9;C9JSW2	Mesoderm-specific transcript homolog protein	MEST	>tr|C9JW74|C9JW74_HUMAN Mesoderm-specific transcript homolog protein OS=Homo sapiens GN=MEST PE=1 SV=1;>sp|Q5EB52|MEST_HUMAN Mesoderm-specific transcript homolog protein OS=Homo sapiens GN=MEST PE=2 SV=2;>tr|C9JWU9|C9JWU9_HUMAN Mesoderm-specific transcript	ENSG00000106484;ENSG00000264872	ENSP00000223215;ENSP00000342749;ENSP00000367839;ENSP00000376884;ENSP00000401657;ENSP00000407222;ENSP00000408933;ENSP00000409505;ENSP00000462286;ENSP00000463277;ENSP00000463571;ENSP00000463883;ENSP00000464161	C9JSW2_HUMAN;C9JW74_HUMAN;C9JWU9_HUMAN;MEST_HUMAN	FDR < 0.01	logFC > 2.0	REGULATED and logFC > 2.0
52	20.8677	19.9059	22.528	20.9585	23.8069	23.7331	23.4644	23.0616	NA	NA	NA	+	Pos	3543	2.29976	0	2.45149	0.954539	Q7RTP6;J3KSK6	Q7RTP6	Protein-methionine sulfoxide oxidase MICAL3	MICAL3	>sp|Q7RTP6|MICA3_HUMAN Protein-methionine sulfoxide oxidase MICAL3 OS=Homo sapiens GN=MICAL3 PE=1 SV=2	ENSG00000243156	ENSP00000207726;ENSP00000372574;ENSP00000383406;ENSP00000391827;ENSP00000410315;ENSP00000414846;ENSP00000416015;ENSP00000462033	MICA3_HUMAN	FDR < 0.01	logFC > 2.0	REGULATED and logFC > 2.0
53	20.9456	21.5372	20.353	20.2826	26.5973	26.4133	26.3748	26.1594	NA	NA	NA	+	Pos	3487	5.76461	0	5.60663	2.4308	Q6UVY6;A6PVS1	Q6UVY6	DBH-like monooxygenase protein 1	MOXD1	>sp|Q6UVY6|MOXD1_HUMAN DBH-like monooxygenase protein 1 OS=Homo sapiens GN=MOXD1 PE=1 SV=1	ENSG00000079931	ENSP00000336998;ENSP00000356940	MOXD1_HUMAN	FDR < 0.01	logFC > 2.0	REGULATED and logFC > 2.0
54	21.0817	21.3067	20.8067	20.9144	23.1616	23.8706	23.777	24.1739	NA	NA	NA	+	Pos	2192	4.56147	0	2.71844	1.21431	P25189;A0A0J9YWT2	P25189;A0A0J9YWT2	Myelin protein P0	MPZ	>sp|P25189|MYP0_HUMAN Myelin protein P0 OS=Homo sapiens GN=MPZ PE=1 SV=1;>tr|A0A0J9YWT2|A0A0J9YWT2_HUMAN Myelin protein P0 (Fragment) OS=Homo sapiens GN=MPZ PE=1 SV=1	ENSG00000158887	ENSP00000353634;ENSP00000431538;ENSP00000432943	MYP0_HUMAN	FDR < 0.01	logFC > 2.0	REGULATED and logFC > 2.0
55	26.4771	26.4844	26.3819	26.7212	20.7572	21.198	21.058	21.0338	NA	NA	NA	+	Pos	1905	8.20556	0	-5.50438	-2.5999	P07196;A0A087X0W2	P07196;A0A087X0W2	Neurofilament light polypeptide	NEFL	>sp|P07196|NFL_HUMAN Neurofilament light polypeptide OS=Homo sapiens GN=NEFL PE=1 SV=3;>tr|A0A087X0W2|A0A087X0W2_HUMAN Neurofilament light polypeptide OS=Homo sapiens GN=NEFL PE=1 SV=1	NA	NA	NFL_HUMAN	FDR < 0.01	logFC > 2.0	REGULATED and logFC > 2.0
56	29.8815	29.842	29.9891	30.1092	21.1936	22.3012	19.4698	21.8151	NA	NA	NA	+	Pos	789	5.10118	0	-8.76054	-3.34244	E7ESP9;P07197;E7EMV2	E7ESP9;P07197;E7EMV2	Neurofilament medium polypeptide	NEFM	>tr|E7ESP9|E7ESP9_HUMAN Neurofilament medium polypeptide OS=Homo sapiens GN=NEFM PE=1 SV=1;>sp|P07197|NFM_HUMAN Neurofilament medium polypeptide OS=Homo sapiens GN=NEFM PE=1 SV=3;>tr|E7EMV2|E7EMV2_HUMAN Neurofilament medium polypeptide OS=Homo sapiens GN=N	ENSG00000104722	ENSP00000221166;ENSP00000410137;ENSP00000412295;ENSP00000427872	E7EMV2_HUMAN;E7ESP9_HUMAN;NFM_HUMAN	FDR < 0.01	logFC > 2.0	REGULATED and logFC > 2.0
57	20.4941	20.2897	20.699	20.788	24.1854	23.5984	23.5104	23.2738	NA	NA	NA	+	Pos	2090	5.03894	0	3.07431	1.38275	P17342	P17342	Atrial natriuretic peptide receptor 3	NPR3	>sp|P17342|ANPRC_HUMAN Atrial natriuretic peptide receptor 3 OS=Homo sapiens GN=NPR3 PE=1 SV=2	ENSG00000113389	ENSP00000265074;ENSP00000398028;ENSP00000402490	ANPRC_HUMAN	FDR < 0.01	logFC > 2.0	REGULATED and logFC > 2.0
58	22.6917	22.6549	20.6298	22.2916	24.7547	24.2277	24.0217	23.3774	NA	NA	NA	+	Pos	4465	1.9406	0.00843636	2.02837	0.790919	Q9H857;H7C519	Q9H857;H7C519	5-nucleotidase domain-containing protein 2	NT5DC2	>sp|Q9H857|NT5D2_HUMAN 5-nucleotidase domain-containing protein 2 OS=Homo sapiens GN=NT5DC2 PE=1 SV=1;>tr|H7C519|H7C519_HUMAN 5-nucleotidase domain-containing protein 2 (Fragment) OS=Homo sapiens GN=NT5DC2 PE=1 SV=1	ENSG00000168268	ENSP00000302468;ENSP00000306017;ENSP00000418780	H7C519_HUMAN;NT5D2_HUMAN	FDR < 0.01	logFC > 2.0	REGULATED and logFC > 2.0
59	20.4794	19.8663	21.4595	21.1411	24.0739	23.7223	23.9467	23.7041	NA	NA	NA	+	Pos	4302	3.85025	0	3.12517	1.32095	Q9BXB5;H7C487;H7C199	Q9BXB5;H7C487	Oxysterol-binding protein-related protein 10;Oxysterol-binding protein	OSBPL10	>sp|Q9BXB5|OSB10_HUMAN Oxysterol-binding protein-related protein 10 OS=Homo sapiens GN=OSBPL10 PE=1 SV=2;>tr|H7C487|H7C487_HUMAN Oxysterol-binding protein (Fragment) OS=Homo sapiens GN=OSBPL10 PE=1 SV=1	ENSG00000144645	ENSP00000379804;ENSP00000406124;ENSP00000416078	H7C487_HUMAN;OSB10_HUMAN	FDR < 0.01	logFC > 2.0	REGULATED and logFC > 2.0
60	24.7232	24.2164	24.3188	21.1253	20.6006	21.7958	21.202	21.2375	NA	NA	NA	+	Pos	47	1.48143	0.0029434	-2.38696	-0.832877	A0A087WUD3;Q9NRP0	A0A087WUD3;Q9NRP0	Oligosaccharyltransferase complex subunit OSTC	OSTC	>tr|A0A087WUD3|A0A087WUD3_HUMAN Oligosaccharyltransferase complex subunit OSTC OS=Homo sapiens GN=OSTC PE=1 SV=1;>sp|Q9NRP0|OSTC_HUMAN Oligosaccharyltransferase complex subunit OSTC OS=Homo sapiens GN=OSTC PE=1 SV=1	ENSG00000198856	ENSP00000354676	OSTC_HUMAN	FDR < 0.01	logFC > 2.0	REGULATED and logFC > 2.0
61	20.2761	20.6875	21.2926	21.2542	23.489	24.1407	23.8737	24.1915	NA	NA	NA	+	Pos	4864	4.34314	0	3.04613	1.3291	Q9UKS6;A0A0C4DGG1;E9PIY1;H0YDM6;E9PJ75;E9PNM9	Q9UKS6;A0A0C4DGG1;E9PIY1	Protein kinase C and casein kinase substrate in neurons protein 3	PACSIN3	>sp|Q9UKS6|PACN3_HUMAN Protein kinase C and casein kinase substrate in neurons protein 3 OS=Homo sapiens GN=PACSIN3 PE=1 SV=2;>tr|A0A0C4DGG1|A0A0C4DGG1_HUMAN Protein kinase C and casein kinase substrate in neurons protein 3 (Fragment) OS=Homo sapiens GN=PA	ENSG00000165912	ENSP00000298838;ENSP00000431948;ENSP00000437252;ENSP00000440945	E9PIY1_HUMAN;PACN3_HUMAN	FDR < 0.01	logFC > 2.0	REGULATED and logFC > 2.0
62	22.3013	21.4435	22.0331	21.8144	24.3986	24.5177	24.4976	24.6423	NA	NA	NA	+	Pos	4649	5.06529	0	2.61598	1.19556	Q9NWQ8	Q9NWQ8	Phosphoprotein associated with glycosphingolipid-enriched microdomains 1	PAG1	>sp|Q9NWQ8|PHAG1_HUMAN Phosphoprotein associated with glycosphingolipid-enriched microdomains 1 OS=Homo sapiens GN=PAG1 PE=1 SV=2	ENSG00000076641	ENSP00000220597	PHAG1_HUMAN	FDR < 0.01	logFC > 2.0	REGULATED and logFC > 2.0
63	21.7172	21.472	21.2207	21.1005	23.4505	23.7781	23.5768	23.6996	NA	NA	NA	+	Pos	985	5.17621	0	2.24863	1.04356	F6TJN8;P57723;C9J0A4;C9JZY3;C9JTY5;C9J5V4;C9IZV9;C9J7A9;C9JSA6	F6TJN8;P57723;C9J0A4;C9JZY3;C9JTY5	Poly(rC)-binding protein 4	PCBP4	>tr|F6TJN8|F6TJN8_HUMAN Poly(rC)-binding protein 4 OS=Homo sapiens GN=PCBP4 PE=1 SV=1;>sp|P57723|PCBP4_HUMAN Poly(rC)-binding protein 4 OS=Homo sapiens GN=PCBP4 PE=2 SV=1;>tr|C9J0A4|C9J0A4_HUMAN Poly(rC)-binding protein 4 OS=Homo sapiens GN=PCBP4 PE=1 SV=1	ENSG00000090097	ENSP00000322341;ENSP00000348111;ENSP00000395030;ENSP00000417100;ENSP00000417196;ENSP00000418925;ENSP00000419557;ENSP00000419694	C9J0A4_HUMAN;C9JTY5_HUMAN;C9JZY3_HUMAN;PCBP4_HUMAN	FDR < 0.01	logFC > 2.0	REGULATED and logFC > 2.0
64	22.9129	23.2293	22.8395	23.0473	20.3903	19.2061	20.2597	21.5825	NA	NA	NA	+	Pos	1588	2.76349	0	-2.6476	-1.06171	O60245	O60245	Protocadherin-7	PCDH7	>sp|O60245|PCDH7_HUMAN Protocadherin-7 OS=Homo sapiens GN=PCDH7 PE=1 SV=2	ENSG00000169851	ENSP00000355243	PCDH7_HUMAN	FDR < 0.01	logFC > 2.0	REGULATED and logFC > 2.0
65	24.0245	23.8259	23.5837	24.4808	26.1343	26.9111	26.7136	26.8108	NA	NA	NA	+	Pos	1405	4.31868	0	2.66375	1.17982	O00151	O00151	PDZ and LIM domain protein 1	PDLIM1	>sp|O00151|PDLI1_HUMAN PDZ and LIM domain protein 1 OS=Homo sapiens GN=PDLIM1 PE=1 SV=4	ENSG00000107438	ENSP00000360305	PDLI1_HUMAN	FDR < 0.01	logFC > 2.0	REGULATED and logFC > 2.0
66	22.0458	21.6487	19.9828	21.0819	23.3773	23.3269	23.2392	23.1267	NA	NA	NA	+	Pos	4914	2.43275	0.00129412	2.0777	0.847463	Q9UPQ7;E7ENB6;B7ZAG0;H7C566;C9JWE6;Q17RL8;Q76G19	Q9UPQ7;E7ENB6;B7ZAG0	E3 ubiquitin-protein ligase PDZRN3	PDZRN3	>sp|Q9UPQ7|PZRN3_HUMAN E3 ubiquitin-protein ligase PDZRN3 OS=Homo sapiens GN=PDZRN3 PE=1 SV=2;>tr|E7ENB6|E7ENB6_HUMAN E3 ubiquitin-protein ligase PDZRN3 OS=Homo sapiens GN=PDZRN3 PE=1 SV=1;>tr|B7ZAG0|B7ZAG0_HUMAN E3 ubiquitin-protein ligase PDZRN3 OS=Homo	ENSG00000121440	ENSP00000263666;ENSP00000308831;ENSP00000418168;ENSP00000418484;ENSP00000418624	B7ZAG0_HUMAN;E7ENB6_HUMAN;PZRN3_HUMAN	FDR < 0.01	logFC > 2.0	REGULATED and logFC > 2.0
67	20.1914	20.5544	20.2816	20.2245	25.0797	24.7855	24.9571	24.9695	NA	NA	NA	+	Pos	2435	8.10513	0	4.63499	2.20448	P47712	P47712	Cytosolic phospholipase A2;Phospholipase A2;Lysophospholipase	PLA2G4A	>sp|P47712|PA24A_HUMAN Cytosolic phospholipase A2 OS=Homo sapiens GN=PLA2G4A PE=1 SV=2	ENSG00000116711	ENSP00000356436	PA24A_HUMAN	FDR < 0.01	logFC > 2.0	REGULATED and logFC > 2.0
68	27.6946	27.729	27.797	27.4574	29.9048	29.737	29.717	29.742	NA	NA	NA	+	Pos	2034	6.52377	0	2.10568	1.00957	P13797;A0A0A0MSQ0;U3KQI3;H7C4N2;P13796;Q5TBN3;F2Z2Z9	P13797;A0A0A0MSQ0	Plastin-3	PLS3	>sp|P13797|PLST_HUMAN Plastin-3 OS=Homo sapiens GN=PLS3 PE=1 SV=4;>tr|A0A0A0MSQ0|A0A0A0MSQ0_HUMAN Plastin-3 OS=Homo sapiens GN=PLS3 PE=1 SV=1	ENSG00000102024;ENSG00000268767	ENSP00000348163;ENSP00000398945;ENSP00000472532;ENSP00000473121	PLST_HUMAN	FDR < 0.01	logFC > 2.0	REGULATED and logFC > 2.0
69	21.7317	21.1488	21.166	21.7356	24.1073	23.3008	23.6591	23.4953	NA	NA	NA	+	Pos	30	4.02479	0	2.19504	0.980258	A0A087WTK0;A0A087WVC6;Q12913;E9PPH3	A0A087WTK0;A0A087WVC6;Q12913	Receptor-type tyrosine-protein phosphatase eta	PTPRJ	>tr|A0A087WTK0|A0A087WTK0_HUMAN Receptor-type tyrosine-protein phosphatase eta OS=Homo sapiens GN=PTPRJ PE=1 SV=1;>tr|A0A087WVC6|A0A087WVC6_HUMAN Receptor-type tyrosine-protein phosphatase eta OS=Homo sapiens GN=PTPRJ PE=1 SV=1;>sp|Q12913|PTPRJ_HUMAN Recep	ENSG00000149177	ENSP00000400010;ENSP00000409733	PTPRJ_HUMAN	FDR < 0.01	logFC > 2.0	REGULATED and logFC > 2.0
70	23.1269	23.2431	22.992	23.4429	20.2533	20.6937	21.3161	20.697	NA	NA	NA	+	Pos	3409	4.31598	0	-2.46123	-1.09954	Q5XKP0;K7EIR2	Q5XKP0;K7EIR2	Protein QIL1	QIL1;C19orf70	>sp|Q5XKP0|MIC13_HUMAN MICOS complex subunit MIC13 OS=Homo sapiens GN=MIC13 PE=1 SV=1;>tr|K7EIR2|K7EIR2_HUMAN MICOS complex subunit MIC13 OS=Homo sapiens GN=C19orf70 PE=1 SV=1	ENSG00000174917	ENSP00000309561;ENSP00000464857	K7EIR2_HUMAN;QIL1_HUMAN	FDR < 0.01	logFC > 2.0	REGULATED and logFC > 2.0
71	26.247	26.4569	26.9308	26.4775	26.2901	19.8558	26.3741	20.7778	NA	NA	NA	+	Pos	920	0.930565	0.00134694	-3.20358	-0.853685	F2Z388;P42766	F2Z388;P42766	60S ribosomal protein L35	RPL35	>tr|F2Z388|F2Z388_HUMAN 60S ribosomal protein L35 OS=Homo sapiens GN=RPL35 PE=1 SV=1;>sp|P42766|RL35_HUMAN 60S ribosomal protein L35 OS=Homo sapiens GN=RPL35 PE=1 SV=2	ENSG00000136942	ENSP00000259469;ENSP00000437215	F2Z388_HUMAN;RL35_HUMAN	FDR < 0.01	logFC > 2.0	REGULATED and logFC > 2.0
72	22.77	22.9827	23.9526	22.9788	26.3229	25.4675	25.4409	24.3571	NA	NA	NA	+	Pos	2661	2.44044	0.00106667	2.22608	0.896833	P60903	P60903	Protein S100-A10	S100A10	>sp|P60903|S10AA_HUMAN Protein S100-A10 OS=Homo sapiens GN=S100A10 PE=1 SV=2	ENSG00000197747	ENSP00000357799;ENSP00000357801	S10AA_HUMAN	FDR < 0.01	logFC > 2.0	REGULATED and logFC > 2.0
73	20.6667	20.9546	23.3574	20.1486	26.8919	26.9573	26.9223	27.1429	NA	NA	NA	+	Pos	1862	3.6854	0	5.69674	2.09909	P04271;A8MRB1	P04271;A8MRB1	Protein S100-B	S100B	>sp|P04271|S100B_HUMAN Protein S100-B OS=Homo sapiens GN=S100B PE=1 SV=2;>tr|A8MRB1|A8MRB1_HUMAN Protein S100-B OS=Homo sapiens GN=S100B PE=1 SV=1	ENSG00000160307	ENSP00000291700;ENSP00000356038;ENSP00000380769	A8MRB1_HUMAN;S100B_HUMAN	FDR < 0.01	logFC > 2.0	REGULATED and logFC > 2.0
74	24.074	24.0895	24.0369	23.992	21.2286	19.9377	20.0356	22.4574	NA	NA	NA	+	Pos	4592	2.73306	0	-3.13331	-1.20865	Q9NSC2;H3BSM9;A9JR48;A0A087WXW6;Q9BXA9;H3BQ32	Q9NSC2;H3BSM9	Sal-like protein 1	SALL1	>sp|Q9NSC2|SALL1_HUMAN Sal-like protein 1 OS=Homo sapiens GN=SALL1 PE=1 SV=2;>tr|H3BSM9|H3BSM9_HUMAN Sal-like protein 1 (Fragment) OS=Homo sapiens GN=SALL1 PE=1 SV=1	ENSG00000103449	ENSP00000251020;ENSP00000407914;ENSP00000456777	H3BSM9_HUMAN;SALL1_HUMAN	FDR < 0.01	logFC > 2.0	REGULATED and logFC > 2.0
75	20.7102	20.6909	20.7404	20.181	24.1806	24.5578	24.3277	24.5633	NA	NA	NA	+	Pos	1745	6.40661	0	3.82672	1.76916	O94885;A0A087WW74;S6FRS6;Q9NSI8	O94885;A0A087WW74	SAM and SH3 domain-containing protein 1	SASH1	>sp|O94885|SASH1_HUMAN SAM and SH3 domain-containing protein 1 OS=Homo sapiens GN=SASH1 PE=1 SV=3;>tr|A0A087WW74|A0A087WW74_HUMAN SAM and SH3 domain-containing protein 1 OS=Homo sapiens GN=SASH1 PE=1 SV=1	ENSG00000111961	ENSP00000356437	SASH1_HUMAN	FDR < 0.01	logFC > 2.0	REGULATED and logFC > 2.0
76	23.5388	23.9117	23.8197	23.517	21.0045	20.5727	20.6486	22.3501	NA	NA	NA	+	Pos	743	3.01982	0	-2.55281	-1.05284	E5RJB8;E5RHU3;E7ESK6;E9PBI9;P34741	E5RJB8;E5RHU3;E7ESK6;E9PBI9;P34741	Syndecan;Syndecan-2	SDC2	>tr|E5RJB8|E5RJB8_HUMAN Syndecan-2 (Fragment) OS=Homo sapiens GN=SDC2 PE=1 SV=1;>tr|E5RHU3|E5RHU3_HUMAN Syndecan-2 (Fragment) OS=Homo sapiens GN=SDC2 PE=1 SV=2;>tr|E7ESK6|E7ESK6_HUMAN Syndecan OS=Homo sapiens GN=SDC2 PE=1 SV=1;>tr|E9PBI9|E9PBI9_HUMAN Synde	ENSG00000169439	ENSP00000307046;ENSP00000427784;ENSP00000428256;ENSP00000429045;ENSP00000429121;ENSP00000429662;ENSP00000441453	E5RHU3_HUMAN;E7ESK6_HUMAN;E9PBI9_HUMAN;SDC2_HUMAN	FDR < 0.01	logFC > 2.0	REGULATED and logFC > 2.0
77	25.0947	24.7767	24.8938	20.2071	22.1277	19.2819	22.115	20.7781	NA	NA	NA	+	Pos	3299	1.01038	0.00733945	-2.66737	-0.793715	Q58EX2;H7C2P2	Q58EX2;H7C2P2	Protein sidekick-2	SDK2	>sp|Q58EX2|SDK2_HUMAN Protein sidekick-2 OS=Homo sapiens GN=SDK2 PE=1 SV=3;>tr|H7C2P2|H7C2P2_HUMAN Protein sidekick-2 (Fragment) OS=Homo sapiens GN=SDK2 PE=1 SV=1	ENSG00000069188	ENSP00000373378;ENSP00000376421;ENSP00000407098	H7C2P2_HUMAN;SDK2_HUMAN	FDR < 0.01	logFC > 2.0	REGULATED and logFC > 2.0
78	21.9909	20.7929	20.9793	21.3321	24.1683	24.3475	24.3046	24.2521	NA	NA	NA	+	Pos	2515	4.52547	0	2.9943	1.321	P50453	P50453	Serpin B9	SERPINB9	>sp|P50453|SPB9_HUMAN Serpin B9 OS=Homo sapiens GN=SERPINB9 PE=1 SV=1	ENSG00000170542	ENSP00000370074	SPB9_HUMAN	FDR < 0.01	logFC > 2.0	REGULATED and logFC > 2.0
79	27.7276	27.2705	27.4475	27.7149	25.5063	25.4931	25.6116	25.4121	NA	NA	NA	+	Pos	63	5.61261	0	-2.03435	-0.960504	A0A087WV23;Q9H299;Q5T123	A0A087WV23;Q9H299;Q5T123	SH3 domain-binding glutamic acid-rich-like protein 3	SH3BGRL3	>tr|A0A087WV23|A0A087WV23_HUMAN SH3 domain-binding glutamic acid-rich-like protein 3 OS=Homo sapiens GN=SH3BGRL3 PE=1 SV=1;>sp|Q9H299|SH3L3_HUMAN SH3 domain-binding glutamic acid-rich-like protein 3 OS=Homo sapiens GN=SH3BGRL3 PE=1 SV=1;>tr|Q5T123|Q5T123_H	ENSG00000142669	ENSP00000270792;ENSP00000363358	Q5T123_HUMAN;SH3L3_HUMAN	FDR < 0.01	logFC > 2.0	REGULATED and logFC > 2.0
80	25.1775	25.3423	25.6365	25.2699	21.1646	20.0587	21.8029	21.8417	NA	NA	NA	+	Pos	25	4.15587	0	-4.1396	-1.70508	A0A087WT87;P43003;A0A087X0U3;E7EUS7;E7EUV6;M0R063;E7EV13;P48664	A0A087WT87;P43003;A0A087X0U3	Excitatory amino acid transporter 1	SLC1A3	>tr|A0A087WT87|A0A087WT87_HUMAN Amino acid transporter OS=Homo sapiens GN=SLC1A3 PE=1 SV=1;>sp|P43003|EAA1_HUMAN Excitatory amino acid transporter 1 OS=Homo sapiens GN=SLC1A3 PE=1 SV=1;>tr|A0A087X0U3|A0A087X0U3_HUMAN Amino acid transporter OS=Homo sapiens	ENSG00000079215	ENSP00000265113;ENSP00000371343	EAA1_HUMAN	FDR < 0.01	logFC > 2.0	REGULATED and logFC > 2.0
81	20.0876	20.6799	20.1855	20.1266	23.5743	23.6497	23.5421	23.1808	NA	NA	NA	+	Pos	2403	5.80417	0	3.2168	1.48024	P43007	P43007	Neutral amino acid transporter A	SLC1A4	>sp|P43007|SATT_HUMAN Neutral amino acid transporter A OS=Homo sapiens GN=SLC1A4 PE=1 SV=1	ENSG00000115902	ENSP00000234256;ENSP00000431942	SATT_HUMAN	FDR < 0.01	logFC > 2.0	REGULATED and logFC > 2.0
82	25.2045	24.7516	25.7932	25.3151	21.6651	22.8036	21.4426	20.7888	NA	NA	NA	+	Pos	1987	3.57604	0	-3.59108	-1.45329	P11166	P11166	Solute carrier family 2, facilitated glucose transporter member 1	SLC2A1	>sp|P11166|GTR1_HUMAN Solute carrier family 2, facilitated glucose transporter member 1 OS=Homo sapiens GN=SLC2A1 PE=1 SV=2	ENSG00000117394	ENSP00000416293	GTR1_HUMAN	FDR < 0.01	logFC > 2.0	REGULATED and logFC > 2.0
83	24.2383	24.5755	25.1255	24.3303	21.0526	20.7019	21.2433	21.0877	NA	NA	NA	+	Pos	1988	5.33132	0	-3.54603	-1.59041	P11169;Q8TDB8	P11169;Q8TDB8	Solute carrier family 2, facilitated glucose transporter member 3;Solute carrier family 2, facilitated glucose transporter member 14	SLC2A3;SLC2A14	>sp|P11169|GTR3_HUMAN Solute carrier family 2, facilitated glucose transporter member 3 OS=Homo sapiens GN=SLC2A3 PE=1 SV=1;>sp|Q8TDB8|GTR14_HUMAN Solute carrier family 2, facilitated glucose transporter member 14 OS=Homo sapiens GN=SLC2A14 PE=2 SV=1	ENSG00000059804;ENSG00000173262	ENSP00000075120;ENSP00000340450;ENSP00000379834;ENSP00000407287;ENSP00000438484;ENSP00000440480	GTR14_HUMAN;GTR3_HUMAN	FDR < 0.01	logFC > 2.0	REGULATED and logFC > 2.0
84	21.2687	21.0047	20.1397	20.2033	23.6034	23.975	23.3344	23.4694	NA	NA	NA	+	Pos	3357	4.06212	0	2.94148	1.27019	Q5T1Q4	Q5T1Q4	Solute carrier family 35 member F1	SLC35F1	>sp|Q5T1Q4|S35F1_HUMAN Solute carrier family 35 member F1 OS=Homo sapiens GN=SLC35F1 PE=2 SV=2	ENSG00000196376	ENSP00000353557	S35F1_HUMAN	FDR < 0.01	logFC > 2.0	REGULATED and logFC > 2.0
85	22.7507	22.6104	22.6987	23.3129	22.3062	19.8644	20.2504	19.8988	NA	NA	NA	+	Pos	123	2.02233	0.00140426	-2.26321	-0.869341	A0A087WYV5;A0A0A6YYB8;X6R3P0;O94813;E9PCX4	A0A087WYV5;A0A0A6YYB8;X6R3P0;O94813	Slit homolog 2 protein;Slit homolog 2 protein N-product;Slit homolog 2 protein C-product	SLIT2	>tr|A0A087WYV5|A0A087WYV5_HUMAN Slit homolog 2 protein OS=Homo sapiens GN=SLIT2 PE=1 SV=1;>tr|A0A0A6YYB8|A0A0A6YYB8_HUMAN Slit homolog 2 protein OS=Homo sapiens GN=SLIT2 PE=1 SV=1;>tr|X6R3P0|X6R3P0_HUMAN Slit homolog 2 protein OS=Homo sapiens GN=SLIT2 PE=1	ENSG00000145147	ENSP00000422261;ENSP00000422591;ENSP00000427548	SLIT2_HUMAN	FDR < 0.01	logFC > 2.0	REGULATED and logFC > 2.0
86	21.3936	21.0033	20.7066	20.5791	24.3031	24.2602	24.4786	24.3593	NA	NA	NA	+	Pos	4443	5.77056	0	3.42967	1.56817	Q9H5Y7	Q9H5Y7	SLIT and NTRK-like protein 6	SLITRK6	>sp|Q9H5Y7|SLIK6_HUMAN SLIT and NTRK-like protein 6 OS=Homo sapiens GN=SLITRK6 PE=2 SV=3	ENSG00000184564	ENSP00000383143	SLIK6_HUMAN	FDR < 0.01	logFC > 2.0	REGULATED and logFC > 2.0
87	21.2218	21.1517	20.9091	20.0601	24.3666	24.5572	24.4583	24.6294	NA	NA	NA	+	Pos	3042	4.97559	0	3.66724	1.61328	Q13884;E5RIX7	Q13884	Beta-1-syntrophin	SNTB1	>sp|Q13884|SNTB1_HUMAN Beta-1-syntrophin OS=Homo sapiens GN=SNTB1 PE=1 SV=3	ENSG00000172164	ENSP00000378965;ENSP00000431124	SNTB1_HUMAN	FDR < 0.01	logFC > 2.0	REGULATED and logFC > 2.0
88	23.1295	20.3762	23.9001	21.1281	26.2463	26.5489	26.8315	27.1385	NA	NA	NA	+	Pos	2640	2.76589	0	4.55783	1.59979	P56693;A6PVD3;H0Y5N4	P56693;A6PVD3	Transcription factor SOX-10	SOX10	>sp|P56693|SOX10_HUMAN Transcription factor SOX-10 OS=Homo sapiens GN=SOX10 PE=1 SV=1;>tr|A6PVD3|A6PVD3_HUMAN Transcription factor SOX-10 (Fragment) OS=Homo sapiens GN=SOX10 PE=1 SV=1	ENSG00000100146	ENSP00000354130;ENSP00000380093;ENSP00000414853	A6PVD3_HUMAN;SOX10_HUMAN	FDR < 0.01	logFC > 2.0	REGULATED and logFC > 2.0
89	25.9205	26.0251	25.756	25.6239	23.5691	23.6887	23.5123	23.6765	NA	NA	NA	+	Pos	288	6.30596	0	-2.21975	-1.05787	A0A0C4DFS6;Q9C004;D6RB56	A0A0C4DFS6;Q9C004	Protein sprouty homolog 4	SPRY4	>tr|A0A0C4DFS6|A0A0C4DFS6_HUMAN Protein sprouty homolog 4 OS=Homo sapiens GN=SPRY4 PE=1 SV=1;>sp|Q9C004|SPY4_HUMAN Protein sprouty homolog 4 OS=Homo sapiens GN=SPRY4 PE=1 SV=2	ENSG00000187678	ENSP00000344967;ENSP00000399468	SPY4_HUMAN	FDR < 0.01	logFC > 2.0	REGULATED and logFC > 2.0
90	21.9043	22.0045	19.181	22.3098	23.8387	24.3158	23.1759	24.0147	NA	NA	NA	+	Pos	2229	1.75328	0.00107865	2.48633	0.898573	P28290;E9PHV5;E7EUL7;H7BZ26	P28290;E9PHV5;E7EUL7	Sperm-specific antigen 2	SSFA2	>sp|P28290|SSFA2_HUMAN Sperm-specific antigen 2 OS=Homo sapiens GN=SSFA2 PE=1 SV=3;>tr|E9PHV5|E9PHV5_HUMAN Sperm-specific antigen 2 OS=Homo sapiens GN=SSFA2 PE=1 SV=1;>tr|E7EUL7|E7EUL7_HUMAN Sperm-specific antigen 2 OS=Homo sapiens GN=SSFA2 PE=1 SV=1	ENSG00000138434	ENSP00000314669;ENSP00000386916;ENSP00000387319;ENSP00000388731	E7EUL7_HUMAN;E9PHV5_HUMAN;SSFA2_HUMAN	FDR < 0.01	logFC > 2.0	REGULATED and logFC > 2.0
91	20.2265	19.7672	20.7215	21.0062	23.2987	23.1179	23.1454	22.9867	NA	NA	NA	+	Pos	5002	4.14555	0	2.70684	1.18674	Q9Y3M8;H3BRG5	Q9Y3M8	StAR-related lipid transfer protein 13	STARD13	>sp|Q9Y3M8|STA13_HUMAN StAR-related lipid transfer protein 13 OS=Homo sapiens GN=STARD13 PE=1 SV=2	ENSG00000133121	ENSP00000255486;ENSP00000338785;ENSP00000382300	STA13_HUMAN	FDR < 0.01	logFC > 2.0	REGULATED and logFC > 2.0
92	23.6711	23.9966	24.403	23.8838	22.3892	21.3527	19.2113	22.9005	NA	NA	NA	+	Pos	1298	1.64098	0.00104348	-2.52521	-0.891933	J3KQI6;Q9BX79;I3L2B6;I3NI08	J3KQI6;Q9BX79	Stimulated by retinoic acid gene 6 protein homolog	STRA6	>tr|J3KQI6|J3KQI6_HUMAN Stimulated by retinoic acid gene 6 protein homolog OS=Homo sapiens GN=STRA6 PE=1 SV=1;>sp|Q9BX79|STRA6_HUMAN Stimulated by retinoic acid gene 6 protein homolog OS=Homo sapiens GN=STRA6 PE=1 SV=1	ENSG00000137868	ENSP00000326085;ENSP00000378537;ENSP00000400403;ENSP00000407176;ENSP00000410221;ENSP00000413012;ENSP00000456609	J3KQI6_HUMAN;STRA6_HUMAN	FDR < 0.01	logFC > 2.0	REGULATED and logFC > 2.0
93	22.5425	21.9066	22.2201	22.0594	25.0822	24.832	24.5109	24.6194	NA	NA	NA	+	Pos	1784	5.06346	0	2.57898	1.18001	O95425;A0A0J9YWY6	O95425;A0A0J9YWY6	Supervillin	SVIL	>sp|O95425|SVIL_HUMAN Supervillin OS=Homo sapiens GN=SVIL PE=1 SV=2;>tr|A0A0J9YWY6|A0A0J9YWY6_HUMAN Supervillin (Fragment) OS=Homo sapiens GN=SVIL PE=1 SV=1	ENSG00000197321	ENSP00000348128;ENSP00000364547;ENSP00000364549	SVIL_HUMAN	FDR < 0.01	logFC > 2.0	REGULATED and logFC > 2.0
94	26.2248	25.8689	25.8508	26.3979	22.793	22.0309	21.6355	21.8835	NA	NA	NA	+	Pos	2856	5.09967	0	-3.99989	-1.75149	Q01995;H0YCU9;E9PJ32	Q01995;H0YCU9	Transgelin	TAGLN	>sp|Q01995|TAGL_HUMAN Transgelin OS=Homo sapiens GN=TAGLN PE=1 SV=4;>tr|H0YCU9|H0YCU9_HUMAN Transgelin (Fragment) OS=Homo sapiens GN=TAGLN PE=1 SV=1	ENSG00000149591	ENSP00000278968;ENSP00000376678;ENSP00000431941;ENSP00000432054;ENSP00000432282;ENSP00000432380	H0YCU9_HUMAN;TAGL_HUMAN	FDR < 0.01	logFC > 2.0	REGULATED and logFC > 2.0
95	23.3844	23.3882	22.6108	23.4078	21.5151	20.2676	20.6642	21.4427	NA	NA	NA	+	Pos	3699	3.07517	0	-2.22542	-0.942427	Q8N3T6	Q8N3T6	Transmembrane protein 132C	TMEM132C	>sp|Q8N3T6|T132C_HUMAN Transmembrane protein 132C OS=Homo sapiens GN=TMEM132C PE=2 SV=3	ENSG00000181234	ENSP00000410852	T132C_HUMAN	FDR < 0.01	logFC > 2.0	REGULATED and logFC > 2.0
96	19.6613	20.9107	21.739	21.7088	23.87	24.0305	23.747	24.0324	NA	NA	NA	+	Pos	1135	2.9866	0	2.91507	1.16973	H0YC42;P55327;E5RFR7;H0YC44	H0YC42;P55327;E5RFR7;H0YC44	Tumor protein D52	TPD52	>tr|H0YC42|H0YC42_HUMAN Uncharacterized protein OS=Homo sapiens PE=4 SV=2;>sp|P55327|TPD52_HUMAN Tumor protein D52 OS=Homo sapiens GN=TPD52 PE=1 SV=2;>tr|E5RFR7|E5RFR7_HUMAN Tumor protein D52 OS=Homo sapiens GN=TPD52 PE=1 SV=1;>tr|H0YC44|H0YC44_HUMAN Tumor	ENSG00000076554;ENSG00000147586	ENSP00000368390;ENSP00000368391;ENSP00000429915;ENSP00000430323;ENSP00000430858;ENSP00000430865	E5RFR7_HUMAN;H0YC42_HUMAN;H0YC44_HUMAN;TPD52_HUMAN	FDR < 0.01	logFC > 2.0	REGULATED and logFC > 2.0
97	21.4221	20.589	19.79	20.2716	22.6902	22.7916	22.2915	22.4876	NA	NA	NA	+	Pos	4548	2.89002	0.00138947	2.04707	0.867161	Q9NQ86;E9PBG3;D6RAU9	Q9NQ86;E9PBG3	E3 ubiquitin-protein ligase TRIM36	TRIM36	>sp|Q9NQ86|TRI36_HUMAN E3 ubiquitin-protein ligase TRIM36 OS=Homo sapiens GN=TRIM36 PE=1 SV=2;>tr|E9PBG3|E9PBG3_HUMAN E3 ubiquitin-protein ligase TRIM36 OS=Homo sapiens GN=TRIM36 PE=1 SV=1	ENSG00000152503	ENSP00000282369;ENSP00000368937;ENSP00000368938;ENSP00000424259	E9PBG3_HUMAN;TRI36_HUMAN	FDR < 0.01	logFC > 2.0	REGULATED and logFC > 2.0
98	23.8736	24.3014	24.325	23.6775	20.1033	20.9877	22.0349	21.0928	NA	NA	NA	+	Pos	1724	3.37773	0	-2.98969	-1.23222	O75962;E7EPJ7;E7EWP2;A0A087X139;F5H228	O75962;E7EPJ7;E7EWP2	Triple functional domain protein	TRIO	>sp|O75962|TRIO_HUMAN Triple functional domain protein OS=Homo sapiens GN=TRIO PE=1 SV=2;>tr|E7EPJ7|E7EPJ7_HUMAN Triple functional domain protein (Fragment) OS=Homo sapiens GN=TRIO PE=1 SV=2;>tr|E7EWP2|E7EWP2_HUMAN Triple functional domain protein OS=Homo	ENSG00000038382	ENSP00000339291;ENSP00000339299;ENSP00000421555;ENSP00000426342;ENSP00000446348	E7EPJ7_HUMAN;E7EWP2_HUMAN;TRIO_HUMAN	FDR < 0.01	logFC > 2.0	REGULATED and logFC > 2.0
99	23.7158	23.6697	23.5192	23.3625	20.4303	20.5239	20.5665	21.188	NA	NA	NA	+	Pos	4671	5.28892	0	-2.88963	-1.31931	Q9NXH9;K7EQQ8;K7EQY6;K7ENI9;K7EQU7	Q9NXH9	tRNA (guanine(26)-N(2))-dimethyltransferase	TRMT1	>sp|Q9NXH9|TRM1_HUMAN tRNA (guanine(26)-N(2))-dimethyltransferase OS=Homo sapiens GN=TRMT1 PE=1 SV=1	ENSG00000104907	ENSP00000221504;ENSP00000350352;ENSP00000416149;ENSP00000466967	TRM1_HUMAN	FDR < 0.01	logFC > 2.0	REGULATED and logFC > 2.0
100	20.4543	22.0631	20.7103	20.6484	23.321	23.6001	23.3807	23.7084	NA	NA	NA	+	Pos	4367	3.25995	0	2.53355	1.06459	Q9GZV5;C9J337;C9J038	Q9GZV5;C9J337	WW domain-containing transcription regulator protein 1	WWTR1	>sp|Q9GZV5|WWTR1_HUMAN WW domain-containing transcription regulator protein 1 OS=Homo sapiens GN=WWTR1 PE=1 SV=1;>tr|C9J337|C9J337_HUMAN WW domain-containing transcription regulator protein 1 (Fragment) OS=Homo sapiens GN=WWTR1 PE=1 SV=1	ENSG00000018408	ENSP00000353847;ENSP00000417339;ENSP00000419234;ENSP00000419465	C9J337_HUMAN;WWTR1_HUMAN	FDR < 0.01	logFC > 2.0	REGULATED and logFC > 2.0
101	23.3761	23.6537	23.6197	23.3133	26.2212	25.8719	25.7886	25.7064	NA	NA	NA	+	Pos	386	5.57039	0	2.40631	1.12345	A0JP08;O60315;E7EUW9;E7ESP8;U3KQ51;U3KPV5;H7C0G0	A0JP08;O60315;E7EUW9	Zinc finger E-box-binding homeobox 2	ZEB2	>tr|A0JP08|A0JP08_HUMAN Zinc finger E-box binding homeobox 2 OS=Homo sapiens GN=ZEB2 PE=1 SV=1;>sp|O60315|ZEB2_HUMAN Zinc finger E-box-binding homeobox 2 OS=Homo sapiens GN=ZEB2 PE=1 SV=1;>tr|E7EUW9|E7EUW9_HUMAN Zinc finger E-box-binding homeobox 2 (Fragme	ENSG00000169554	ENSP00000302501;ENSP00000386854;ENSP00000395496;ENSP00000443792;ENSP00000454157	A0JP08_HUMAN;E7EUW9_HUMAN;ZEB2_HUMAN	FDR < 0.01	logFC > 2.0	REGULATED and logFC > 2.0
102	24.095	24.3372	24.3416	24.4682	20.482	20.3663	21.2132	20.4036	NA	NA	NA	+	Pos	106	5.60319	0	-3.69423	-1.66776	A0A087WY47;O95409	A0A087WY47;O95409	Zinc finger protein ZIC 2	ZIC2	>tr|A0A087WY47|A0A087WY47_HUMAN Zinc finger protein ZIC 2 OS=Homo sapiens GN=ZIC2 PE=1 SV=1;>sp|O95409|ZIC2_HUMAN Zinc finger protein ZIC 2 OS=Homo sapiens GN=ZIC2 PE=1 SV=2	ENSG00000043355	ENSP00000365514	ZIC2_HUMAN	FDR < 0.01	logFC > 2.0	REGULATED and logFC > 2.0
103	24.4831	25.2778	24.8683	24.3399	22.3415	20.7813	20.9336	20.5476	NA	NA	NA	+	Pos	975	3.65297	0	-3.59128	-1.46216	F5H7S1;Q2M1K9	F5H7S1;Q2M1K9	Zinc finger protein 423	ZNF423	>tr|F5H7S1|F5H7S1_HUMAN Zinc finger protein 423 OS=Homo sapiens GN=ZNF423 PE=1 SV=1;>sp|Q2M1K9|ZN423_HUMAN Zinc finger protein 423 OS=Homo sapiens GN=ZNF423 PE=1 SV=1	ENSG00000102935	ENSP00000262383;ENSP00000442321;ENSP00000455061;ENSP00000455426;ENSP00000455588;ENSP00000457664;ENSP00000457928	F5H7S1_HUMAN;ZN423_HUMAN	FDR < 0.01	logFC > 2.0	REGULATED and logFC > 2.0
104	24.8376	24.9526	24.8401	24.7167	25.0695	24.7572	24.6548	24.6802	NA	NA	NA	NA	NA	0	0.16735	0.896128	-0.0463171	-0.0219825	A0A024QZX5;A0A087X1N8;P35237;C9JTJ8;C9JVA8	A0A024QZX5;A0A087X1N8;P35237	Serpin B6	SERPINB6	>tr|A0A024QZX5|A0A024QZX5_HUMAN Serpin B6 OS=Homo sapiens GN=SERPINB6 PE=1 SV=1;>tr|A0A087X1N8|A0A087X1N8_HUMAN Serpin B6 OS=Homo sapiens GN=SERPINB6 PE=1 SV=1;>sp|P35237|SPB6_HUMAN Serpin B6 OS=Homo sapiens GN=SERPINB6 PE=1 SV=3	ENSG00000124570	ENSP00000338358;ENSP00000369891;ENSP00000369896;ENSP00000369901;ENSP00000369912;ENSP00000369919	SPB6_HUMAN	Not Sig	logFC < 2.0	UNCERTAIN
105	23.0892	22.8343	22.9971	23.2344	22.7293	22.9141	23.0189	22.96	NA	NA	NA	NA	NA	2	0.601918	0.70306	-0.133168	-0.0632746	A0A024R216;Q9Y3E1;H3BPM9	A0A024R216;Q9Y3E1	Hepatoma-derived growth factor-related protein 3	HDGFRP3	>tr|A0A024R216|A0A024R216_HUMAN Hepatoma-derived growth factor, related protein 3, isoform CRA_a OS=Homo sapiens GN=HDGFRP3 PE=1 SV=1;>sp|Q9Y3E1|HDGR3_HUMAN Hepatoma-derived growth factor-related protein 3 OS=Homo sapiens GN=HDGFRP3 PE=1 SV=1	NA	NA	HDGR3_HUMAN	Not Sig	logFC < 2.0	UNCERTAIN
106	24.0032	23.8355	24.0288	23.9003	23.4322	23.5578	23.3936	23.2144	NA	NA	NA	NA	NA	3	3.18325	0.22814	-0.542408	-0.260267	A0A024R412;A0A024R3W6;Q7LBX6;X5D2Q8;O60462;C9JH98	A0A024R412;A0A024R3W6;Q7LBX6;X5D2Q8;O60462	Neuropilin-2	NRP2	>tr|A0A024R412|A0A024R412_HUMAN Neuropilin 2, isoform CRA_c OS=Homo sapiens GN=NRP2 PE=1 SV=1;>tr|A0A024R3W6|A0A024R3W6_HUMAN Neuropilin 2, isoform CRA_h OS=Homo sapiens GN=NRP2 PE=1 SV=1;>tr|Q7LBX6|Q7LBX6_HUMAN Neuropilin 2 OS=Homo sapiens GN=NRP2 PE=1 SV	ENSG00000118257	ENSP00000272849;ENSP00000347238;ENSP00000349632;ENSP00000350432;ENSP00000353582;ENSP00000387519;ENSP00000407626	NRP2_HUMAN;Q7LBX6_HUMAN	Not Sig	logFC < 2.0	UNCERTAIN
107	27.4247	27.4022	27.2994	27.3129	27.2727	27.5038	27.4363	27.4957	NA	NA	NA	NA	NA	4	0.494248	0.841451	0.067327	0.0326486	A0A024R4E5;Q00341;H0Y394;H7C0A4;C9J5E5;C9JIZ1;C9JZI8;H7BZC3;C9JHS7;C9JHZ8;C9JES8;H7C2D1;C9JT62;C9JK79;C9JBS3;C9JEJ8;A0A0U1RVI6;C9JHN6;C9JMQ6;C9JQ82;C9JHS9;C9J739;H7C3D0	A0A024R4E5;Q00341;H0Y394	Vigilin	HDLBP	>tr|A0A024R4E5|A0A024R4E5_HUMAN High density lipoprotein binding protein (Vigilin), isoform CRA_a OS=Homo sapiens GN=HDLBP PE=1 SV=1;>sp|Q00341|VIGLN_HUMAN Vigilin OS=Homo sapiens GN=HDLBP PE=1 SV=2;>tr|H0Y394|H0Y394_HUMAN Vigilin (Fragment) OS=Homo sapien	ENSG00000115677	ENSP00000312042;ENSP00000362389;ENSP00000375836;ENSP00000375837;ENSP00000399139	H0Y394_HUMAN;VIGLN_HUMAN	Not Sig	logFC < 2.0	UNCERTAIN
108	28.6508	28.5882	28.5496	28.7828	27.9161	28.4971	28.4704	28.5867	NA	NA	NA	NA	NA	5	0.860357	0.476703	-0.275246	-0.127377	A0A024R4M0;P46781;B5MCT8;C9JM19;F2Z3C0;A8MXK4	A0A024R4M0;P46781;B5MCT8;C9JM19	40S ribosomal protein S9	RPS9	>tr|A0A024R4M0|A0A024R4M0_HUMAN 40S ribosomal protein S9 OS=Homo sapiens GN=RPS9 PE=1 SV=1;>sp|P46781|RS9_HUMAN 40S ribosomal protein S9 OS=Homo sapiens GN=RPS9 PE=1 SV=3;>tr|B5MCT8|B5MCT8_HUMAN 40S ribosomal protein S9 OS=Homo sapiens GN=RPS9 PE=1 SV=1;>t	ENSG00000170889;ENSG00000263076;ENSG00000263332	ENSP00000302896;ENSP00000375632;ENSP00000375633;ENSP00000383937;ENSP00000391823;ENSP00000406159;ENSP00000414314;ENSP00000458947;ENSP00000459239;ENSP00000460241;ENSP00000461170;ENSP00000461356;ENSP00000461393	B5MCT8_HUMAN;C9JM19_HUMAN;RS9_HUMAN	Not Sig	logFC < 2.0	UNCERTAIN
109	22.7632	22.3702	22.4562	22.5865	20.3012	22.9411	22.7085	22.7707	NA	NA	NA	NA	NA	6	0.231245	0.443614	-0.363652	-0.138054	A0A024R4N9;E7EQB3;Q9BSV6;B0V3J0;A9C4B9;A0A0G2JNK5	A0A024R4N9;E7EQB3;Q9BSV6;B0V3J0;A9C4B9;A0A0G2JNK5	tRNA-splicing endonuclease subunit Sen34	TSEN34	>tr|A0A024R4N9|A0A024R4N9_HUMAN tRNA-splicing endonuclease subunit Sen34 OS=Homo sapiens GN=TSEN34 PE=1 SV=1;>tr|E7EQB3|E7EQB3_HUMAN tRNA-splicing endonuclease subunit Sen34 OS=Homo sapiens GN=TSEN34 PE=1 SV=2;>sp|Q9BSV6|SEN34_HUMAN tRNA-splicing endonucle	ENSG00000170892;ENSG00000262716;ENSG00000262868;ENSG00000267903;ENSG00000268562;ENSG00000268588;ENSG00000268973;ENSG00000269221;ENSG00000269366	ENSP00000305524;ENSP00000379667;ENSP00000379671;ENSP00000397402;ENSP00000400743;ENSP00000408689;ENSP00000458617;ENSP00000458732;ENSP00000458776;ENSP00000458839;ENSP00000459858;ENSP00000460175;ENSP00000460819;ENSP00000460904;ENSP00000461803;ENSP00000468875;ENSP00000469088;ENSP00000469131;ENSP00000469743;ENSP00000470873;ENSP00000470924;ENSP00000471027;ENSP00000471131;ENSP00000471282;ENSP00000471329…	A9C4B9_HUMAN;B0V3J0_HUMAN;E7EQB3_HUMAN;SEN34_HUMAN	Not Sig	logFC < 2.0	UNCERTAIN
110	27.5266	27.4166	26.9312	27.5225	27.1521	27.4934	27.4324	27.6424	NA	NA	NA	NA	NA	8	0.180243	0.823018	0.0808187	0.0371595	A0A024RA52;P25787;C9JCK5;H3BT36;H7C402	A0A024RA52;P25787;C9JCK5	Proteasome subunit alpha type;Proteasome subunit alpha type-2	PSMA2	>tr|A0A024RA52|A0A024RA52_HUMAN Proteasome subunit alpha type OS=Homo sapiens GN=PSMA2 PE=1 SV=1;>sp|P25787|PSA2_HUMAN Proteasome subunit alpha type-2 OS=Homo sapiens GN=PSMA2 PE=1 SV=2;>tr|C9JCK5|C9JCK5_HUMAN Proteasome subunit alpha type-2 OS=Homo sapien	ENSG00000106588	ENSP00000223321;ENSP00000404858	C9JCK5_HUMAN;PSA2_HUMAN	Not Sig	logFC < 2.0	UNCERTAIN
111	23.708	23.6812	23.993	23.747	23.7222	23.4754	23.6471	23.3202	NA	NA	NA	NA	NA	9	1.09264	0.513637	-0.241066	-0.113982	A0A024RAC6;Q14241	A0A024RAC6;Q14241	Transcription elongation factor B polypeptide 3	TCEB3	>tr|A0A024RAC6|A0A024RAC6_HUMAN Transcription elongation factor B polypeptide 3 OS=Homo sapiens GN=TCEB3 PE=1 SV=1;>sp|Q14241|ELOA1_HUMAN Transcription elongation factor B polypeptide 3 OS=Homo sapiens GN=TCEB3 PE=1 SV=2	ENSG00000011007	ENSP00000395574	ELOA1_HUMAN	Not Sig	logFC < 2.0	UNCERTAIN
112	22.117	20.01	20.0319	21.9186	21.9919	22.5971	22.6643	22.7876	NA	NA	NA	NA	NA	10	1.31254	0.0290538	1.49083	0.572418	G8JLL2;A0A0G2JK02;A0A0G2JIU6;A0A0G2JHB6;A0A0G2JKR3;A0A0G2JLL3;A0A0G2JLA3;A0A0G2JH76;A0A024RCQ8;Q9UMR5;A0A0G2JLK6	G8JLL2;A0A0G2JK02;A0A0G2JIU6;A0A0G2JHB6;A0A0G2JKR3;A0A0G2JLL3;A0A0G2JLA3;A0A0G2JH76;A0A024RCQ8;Q9UMR5;A0A0G2JLK6	Lysosomal thioesterase PPT2	PPT2;hCG_1999928	>tr|G8JLL2|G8JLL2_HUMAN Lysosomal thioesterase PPT2 (Fragment) OS=Homo sapiens GN=PPT2 PE=1 SV=1;>tr|A0A0G2JK02|A0A0G2JK02_HUMAN Lysosomal thioesterase PPT2 (Fragment) OS=Homo sapiens GN=PPT2 PE=1 SV=1;>tr|A0A0G2JIU6|A0A0G2JIU6_HUMAN Lysosomal thioesterase	ENSG00000168452;ENSG00000206256;ENSG00000206329;ENSG00000221988;ENSG00000227600;ENSG00000228116;ENSG00000231618;ENSG00000236649	ENSP00000320528;ENSP00000364279;ENSP00000364285;ENSP00000378894;ENSP00000382748;ENSP00000382749;ENSP00000382750;ENSP00000387444;ENSP00000388341;ENSP00000389930;ENSP00000392069;ENSP00000392885;ENSP00000395242;ENSP00000398847;ENSP00000399879;ENSP00000403820;ENSP00000404636;ENSP00000405631;ENSP00000406496;ENSP00000406566;ENSP00000408333;ENSP00000408703;ENSP00000409821;ENSP00000410001;ENSP00000411007…	G8JLL2_HUMAN;PPT2_HUMAN	Not Sig	logFC < 2.0	UNCERTAIN
113	25.2097	25.1439	25.357	25.3376	25.2045	25.4417	25.3754	25.3419	NA	NA	NA	NA	NA	11	0.505163	0.820411	0.0788283	0.0380538	A0A024RCR6;A0A0G2JK23;P46379;A0A0G2JL47;H0Y710;F6S6P2;X6REW1;A0A0G2JJM1;H0Y4L1;F6TC96;F6UR09;F6U1F2;F6XTU0;A0A0G2JJR8;F6WML8;F6VEM6;F6X9W3;F6U341	A0A024RCR6;A0A0G2JK23;P46379;A0A0G2JL47	Large proline-rich protein BAG6	BAT3;BAG6	>tr|A0A024RCR6|A0A024RCR6_HUMAN HLA-B associated transcript 3, isoform CRA_a OS=Homo sapiens GN=BAT3 PE=1 SV=1;>tr|A0A0G2JK23|A0A0G2JK23_HUMAN Large proline-rich protein BAG6 OS=Homo sapiens GN=BAG6 PE=1 SV=1;>sp|P46379|BAG6_HUMAN Large proline-rich protei	ENSG00000096155;ENSG00000204463;ENSG00000227761;ENSG00000228760;ENSG00000229524;ENSG00000233348;ENSG00000234651	ENSP00000211379;ENSP00000354368;ENSP00000354875;ENSP00000365131;ENSP00000365143;ENSP00000372938;ENSP00000372940;ENSP00000384494;ENSP00000389121;ENSP00000390185;ENSP00000390966;ENSP00000397894;ENSP00000397978;ENSP00000400275;ENSP00000402856;ENSP00000405731;ENSP00000410156;ENSP00000412110;ENSP00000413327;ENSP00000413341;ENSP00000413698;ENSP00000415427;ENSP00000446525;ENSP00000447546;ENSP00000447946…	BAG6_HUMAN	Not Sig	logFC < 2.0	UNCERTAIN
114	22.2789	23.0953	23.6724	23.6861	22.3623	22.9562	20.0646	20.0942	NA	NA	NA	NA	NA	13	1.15483	0.0197722	-1.81387	-0.642274	A0A087WV90;E9PDN5;A0A087WTU7;A0A075B6G3;P11532;E7EQR9;E7EQS5;F8VX32;E7ESB2;H0Y304;F5GZY3;H0Y3E8	A0A087WV90;E9PDN5;A0A087WTU7;A0A075B6G3;P11532;E7EQR9;E7EQS5;F8VX32;E7ESB2;H0Y304	Dystrophin	DMD	>tr|A0A087WV90|A0A087WV90_HUMAN Dystrophin OS=Homo sapiens GN=DMD PE=1 SV=1;>tr|E9PDN5|E9PDN5_HUMAN Dystrophin OS=Homo sapiens GN=DMD PE=1 SV=1;>tr|A0A087WTU7|A0A087WTU7_HUMAN Dystrophin OS=Homo sapiens GN=DMD PE=1 SV=1;>tr|A0A075B6G3|A0A075B6G3_HUMAN Dyst	ENSG00000198947	ENSP00000340057;ENSP00000350765;ENSP00000352894;ENSP00000354464;ENSP00000354923;ENSP00000367948;ENSP00000367951;ENSP00000367974;ENSP00000367979;ENSP00000367997;ENSP00000417123	DMD_HUMAN;E7EQR9_HUMAN;E7EQS5_HUMAN;E7ESB2_HUMAN;E9PDN5_HUMAN;F8VX32_HUMAN;H0Y304_HUMAN	Not Sig	logFC < 2.0	UNCERTAIN
115	24.0688	24.0865	24.1261	23.9506	23.7197	23.8816	23.9183	23.6524	NA	NA	NA	NA	NA	15	1.9335	0.474982	-0.265018	-0.127778	A0A075B7F8;A8CG34;A0A087WY75;Q96HA1;A6NF01;A8MY32;C9JFL1	A0A075B7F8;A8CG34;A0A087WY75;Q96HA1	Nuclear envelope pore membrane protein POM 121C;Nuclear envelope pore membrane protein POM 121	POM121C;POM121	>tr|A0A075B7F8|A0A075B7F8_HUMAN Nuclear envelope pore membrane protein POM 121C OS=Homo sapiens GN=POM121C PE=1 SV=2;>sp|A8CG34|P121C_HUMAN Nuclear envelope pore membrane protein POM 121C OS=Homo sapiens GN=POM121C PE=1 SV=2;>tr|A0A087WY75|A0A087WY75_HUMAN	ENSG00000135213;ENSG00000196313;ENSG00000262122	ENSP00000257622;ENSP00000257665;ENSP00000351124;ENSP00000405562;ENSP00000414208;ENSP00000458997;ENSP00000459163;ENSP00000459607	P121A_HUMAN;P121C_HUMAN	Not Sig	logFC < 2.0	UNCERTAIN
116	19.9824	21.7506	21.7653	19.9701	21.4074	21.9709	21.9209	21.9878	NA	NA	NA	NA	NA	16	0.908904	0.114466	0.954607	0.376905	A0A075B7G8;J3KPL8;O00213;A0A087X0V7;A0A087WYH9;V9GY97;V9GYR7	A0A075B7G8;J3KPL8;O00213;A0A087X0V7;A0A087WYH9;V9GY97	Amyloid beta A4 precursor protein-binding family B member 1	TIGD4;APBB1	>tr|A0A075B7G8|A0A075B7G8_HUMAN Amyloid beta A4 precursor protein-binding family B member 1 OS=Homo sapiens GN=APBB1 PE=1 SV=6;>tr|J3KPL8|J3KPL8_HUMAN Amyloid beta A4 precursor protein-binding family B member 1 OS=Homo sapiens GN=APBB1 PE=1 SV=1;>sp|O00213	ENSG00000166313	ENSP00000299402;ENSP00000311912;ENSP00000374556;ENSP00000433338	APBB1_HUMAN;J3KPL8_HUMAN	Not Sig	logFC < 2.0	UNCERTAIN
117	25.2517	25.15	24.7394	25.4651	24.8531	24.9538	25.2035	25.3507	NA	NA	NA	NA	NA	19	0.120175	0.865937	-0.0612407	-0.0279625	V9HW75;A0A087WSV8;P80303;E9PKG6;Q2L696;E9PLR0;H0YEG8;E9PLE9;E9PJP3;H0YD18;E9PM22	V9HW75;A0A087WSV8;P80303;E9PKG6;Q2L696	Nucleobindin-2;Nesfatin-1	HEL-S-109;NUCB2;DCAF5;Nucb2	>tr|V9HW75|V9HW75_HUMAN Epididymis secretory protein Li 109 OS=Homo sapiens GN=HEL-S-109 PE=1 SV=1;>tr|A0A087WSV8|A0A087WSV8_HUMAN Nucleobindin 2, isoform CRA_b OS=Homo sapiens GN=NUCB2 PE=1 SV=1;>sp|P80303|NUCB2_HUMAN Nucleobindin-2 OS=Homo sapiens GN=NUC	ENSG00000070081	ENSP00000320168;ENSP00000433542;ENSP00000436455	E9PKG6_HUMAN;NUCB2_HUMAN;Q2L696_HUMAN	Not Sig	logFC < 2.0	UNCERTAIN
118	27.8112	27.862	27.8918	27.8183	27.7761	28.1668	28.0046	27.9602	NA	NA	NA	NA	NA	20	0.787054	0.704093	0.131098	0.0629514	A0A087WSW9;A0A087WSY9;Q16881;F8W809;E9PNQ6;E2QRB9;E9PIR7;E9PKD3;A0A0B4J225;E9PIZ5;E9PLT3;E9PKI4;E9PRI8;E9PQI3;A0A096LPD9;E7EWK1;A0A096LPK7;E7ENA2;D3YTF8;D3YTF9;Q9NNW7	A0A087WSW9;A0A087WSY9;Q16881;F8W809;E9PNQ6;E2QRB9;E9PIR7	Thioredoxin reductase 1, cytoplasmic	TXNRD1;GML	>tr|A0A087WSW9|A0A087WSW9_HUMAN Thioredoxin reductase 1, cytoplasmic OS=Homo sapiens GN=TXNRD1 PE=1 SV=1;>tr|A0A087WSY9|A0A087WSY9_HUMAN Thioredoxin reductase 1, cytoplasmic OS=Homo sapiens GN=TXNRD1 PE=1 SV=2;>sp|Q16881|TRXR1_HUMAN Thioredoxin reductase 1	ENSG00000198431	ENSP00000373506;ENSP00000380844;ENSP00000421934;ENSP00000432812;ENSP00000433425;ENSP00000433887;ENSP00000433935;ENSP00000434516;ENSP00000435123;ENSP00000435929	E2QRB9_HUMAN;E9PIR7_HUMAN;E9PNQ6_HUMAN;TRXR1_HUMAN	Not Sig	logFC < 2.0	UNCERTAIN
119	25.6472	25.3444	25.6975	26.0371	24.5397	24.6916	24.746	25.2043	NA	NA	NA	NA	NA	21	2.33914	0.0913165	-0.886137	-0.402515	A0A087X2I2;A0A087WT12;P36969;K7ERP4;K7EJ20;K7EKX7;K7ENB4;R4GNE4;A0A0A0MTT1;A0A087X247	A0A087X2I2;A0A087WT12;P36969;K7ERP4;K7EJ20;K7EKX7;K7ENB4;R4GNE4;A0A0A0MTT1	Phospholipid hydroperoxide glutathione peroxidase, mitochondrial;Glutathione peroxidase	GPX4	>tr|A0A087X2I2|A0A087X2I2_HUMAN Glutathione peroxidase OS=Homo sapiens GN=GPX4 PE=1 SV=1;>tr|A0A087WT12|A0A087WT12_HUMAN Glutathione peroxidase OS=Homo sapiens GN=GPX4 PE=1 SV=1;>sp|P36969|GPX4_HUMAN Phospholipid hydroperoxide glutathione peroxidase, mitoc	ENSG00000167468	ENSP00000346103;ENSP00000464989;ENSP00000465828;ENSP00000466872;ENSP00000468349	GPX4_HUMAN;K7EJ20_HUMAN;K7EKX7_HUMAN;K7ENB4_HUMAN;K7ERP4_HUMAN	Not Sig	logFC < 2.0	UNCERTAIN
120	23.7009	23.335	23.7196	23.8763	24.1394	23.688	23.8133	23.6907	NA	NA	NA	NA	NA	23	0.514291	0.630701	0.174886	0.0811042	A0A087WT44;P30519;I3L1Y2;I3L159;I3L1F5	A0A087WT44;P30519;I3L1Y2;I3L159;I3L1F5	Heme oxygenase 2	HMOX2	>tr|A0A087WT44|A0A087WT44_HUMAN Heme oxygenase 2 OS=Homo sapiens GN=HMOX2 PE=1 SV=1;>sp|P30519|HMOX2_HUMAN Heme oxygenase 2 OS=Homo sapiens GN=HMOX2 PE=1 SV=2;>tr|I3L1Y2|I3L1Y2_HUMAN Heme oxygenase 2 (Fragment) OS=Homo sapiens GN=HMOX2 PE=1 SV=1;>tr|I3L159	ENSG00000103415	ENSP00000219700;ENSP00000381595;ENSP00000385100;ENSP00000391637;ENSP00000394103;ENSP00000458592;ENSP00000458797;ENSP00000459203;ENSP00000459214	HMOX2_HUMAN;I3L159_HUMAN;I3L1F5_HUMAN;I3L1Y2_HUMAN	Not Sig	logFC < 2.0	UNCERTAIN
121	23.8662	23.6791	23.715	23.7101	23.6703	23.9221	23.6511	23.9861	NA	NA	NA	NA	NA	24	0.281755	0.850063	0.0647993	0.0309232	A0A087WT45;Q4V328;A0A075B793;A0A087WXA6;A0A087WW92;A0A087WZF5	A0A087WT45;Q4V328;A0A075B793;A0A087WXA6	GRIP1-associated protein 1	GRIPAP1	>tr|A0A087WT45|A0A087WT45_HUMAN GRIP1-associated protein 1 OS=Homo sapiens GN=GRIPAP1 PE=1 SV=1;>sp|Q4V328|GRAP1_HUMAN GRIP1-associated protein 1 OS=Homo sapiens GN=GRIPAP1 PE=1 SV=1;>tr|A0A075B793|A0A075B793_HUMAN GRIP1-associated protein 1 OS=Homo sapien	ENSG00000068400	ENSP00000365606;ENSP00000365608;ENSP00000365624	GRAP1_HUMAN	Not Sig	logFC < 2.0	UNCERTAIN
122	24.2087	23.962	23.6524	23.9032	24.5525	24.7101	24.8836	25.0583	NA	NA	NA	NA	NA	26	2.82148	0.0907416	0.869546	0.402947	A0A087WT99;Q9H0W9;E9PJU8;E9PPB5;E9PQS1;E9PR95;E9PSC3;E9PLC5;E9PLB3;E9PIP1	A0A087WT99;Q9H0W9;E9PJU8;E9PPB5;E9PQS1	Ester hydrolase C11orf54	C11orf54	>tr|A0A087WT99|A0A087WT99_HUMAN Ester hydrolase C11orf54 OS=Homo sapiens GN=C11orf54 PE=1 SV=1;>sp|Q9H0W9|CK054_HUMAN Ester hydrolase C11orf54 OS=Homo sapiens GN=C11orf54 PE=1 SV=1;>tr|E9PJU8|E9PJU8_HUMAN Ester hydrolase C11orf54 (Fragment) OS=Homo sapiens	ENSG00000182919	ENSP00000331209;ENSP00000346403;ENSP00000433721;ENSP00000433723;ENSP00000434382;ENSP00000434627;ENSP00000435107;ENSP00000435113;ENSP00000442094	CK054_HUMAN;E9PJU8_HUMAN;E9PPB5_HUMAN;E9PQS1_HUMAN	Not Sig	logFC < 2.0	UNCERTAIN
123	25.2032	25.1219	24.8512	25.0818	23.5679	23.6086	23.6809	23.99	NA	NA	NA	NA	NA	29	4.49802	0.0202516	-1.35268	-0.637514	A0A087WTF6;A0A087WX77;A0A087WWD4;A0A087WV75;P13591;H7BYX6;A0A087WTE4;A0A0D9SF98;A0A087WWJ5;A0A087X1V2;A0A087WVU1;A0A0C4DGS4;A0A0D9SF30;A0A087WZS4	A0A087WTF6;A0A087WX77;A0A087WWD4;A0A087WV75;P13591;H7BYX6;A0A087WTE4;A0A0D9SF98;A0A087WWJ5	Neural cell adhesion molecule 1	NCAM1	>tr|A0A087WTF6|A0A087WTF6_HUMAN Neural cell adhesion molecule 1 OS=Homo sapiens GN=NCAM1 PE=1 SV=1;>tr|A0A087WX77|A0A087WX77_HUMAN Neural cell adhesion molecule 1 OS=Homo sapiens GN=NCAM1 PE=1 SV=1;>tr|A0A087WWD4|A0A087WWD4_HUMAN Neural cell adhesion molec	ENSG00000149294;ENSG00000262279	ENSP00000318472;ENSP00000384055;ENSP00000459932;ENSP00000465154;ENSP00000466544;ENSP00000466769;ENSP00000467282;ENSP00000467650	H7BYX6_HUMAN;NCAM1_HUMAN	Not Sig	logFC < 2.0	UNCERTAIN
124	23.4344	23.1845	23.057	23.3736	21.9691	22.2717	22.6742	22.6079	NA	NA	NA	NA	NA	36	2.51123	0.0909379	-0.881645	-0.403559	A0A087WTV6;Q96C36;J3KR12;A0A087WZR9;A0A087WX69;A0A087WZF0	A0A087WTV6;Q96C36;J3KR12;A0A087WZR9	Pyrroline-5-carboxylate reductase 2	PYCR2	>tr|A0A087WTV6|A0A087WTV6_HUMAN Pyrroline-5-carboxylate reductase 2 OS=Homo sapiens GN=PYCR2 PE=1 SV=1;>sp|Q96C36|P5CR2_HUMAN Pyrroline-5-carboxylate reductase 2 OS=Homo sapiens GN=PYCR2 PE=1 SV=1;>tr|J3KR12|J3KR12_HUMAN Uncharacterized protein OS=Homo sap	ENSG00000143811;ENSG00000255835	ENSP00000342502;ENSP00000414068	J3KR12_HUMAN;P5CR2_HUMAN	Not Sig	logFC < 2.0	UNCERTAIN
125	26.4674	26.2595	26.139	26.2185	25.9605	26.3429	26.3951	26.461	NA	NA	NA	NA	NA	37	0.0496639	0.969573	0.0187716	0.00880283	A0A087WVR3;A0A087WTW0;Q96T88;A0A087WWG9	A0A087WVR3;A0A087WTW0;Q96T88;A0A087WWG9	E3 ubiquitin-protein ligase UHRF1	UHRF1	>tr|A0A087WVR3|A0A087WVR3_HUMAN E3 ubiquitin-protein ligase UHRF1 OS=Homo sapiens GN=UHRF1 PE=1 SV=1;>tr|A0A087WTW0|A0A087WTW0_HUMAN E3 ubiquitin-protein ligase UHRF1 OS=Homo sapiens GN=UHRF1 PE=1 SV=1;>sp|Q96T88|UHRF1_HUMAN E3 ubiquitin-protein ligase UHR	NA	NA	UHRF1_HUMAN	Not Sig	logFC < 2.0	UNCERTAIN
126	24.2928	24.5653	24.7007	24.1594	24.8711	24.453	24.3543	23.9711	NA	NA	NA	NA	NA	41	0.0264479	0.975962	-0.0171895	-0.00773448	A0A087WU64;A6NMQ1;P09884	A0A087WU64;A6NMQ1;P09884	DNA polymerase;DNA polymerase alpha catalytic subunit	POLA1	>tr|A0A087WU64|A0A087WU64_HUMAN DNA polymerase OS=Homo sapiens GN=POLA1 PE=1 SV=1;>tr|A6NMQ1|A6NMQ1_HUMAN DNA polymerase OS=Homo sapiens GN=POLA1 PE=1 SV=1;>sp|P09884|DPOLA_HUMAN DNA polymerase alpha catalytic subunit OS=Homo sapiens GN=POLA1 PE=1 SV=2	ENSG00000101868	ENSP00000368349;ENSP00000368358	A6NMQ1_HUMAN;DPOLA_HUMAN	Not Sig	logFC < 2.0	UNCERTAIN
127	22.8729	22.5854	22.1405	21.4906	22.4971	22.5233	21.9508	22.2653	NA	NA	NA	NA	NA	42	0.0387454	0.93146	0.0367703	0.0157882	A0A087WU65;Q9NRW7;Q5T4Q0	A0A087WU65;Q9NRW7;Q5T4Q0	Vacuolar protein sorting-associated protein 45	VPS45	>tr|A0A087WU65|A0A087WU65_HUMAN Vacuolar protein sorting-associated protein 45 OS=Homo sapiens GN=VPS45 PE=1 SV=1;>sp|Q9NRW7|VPS45_HUMAN Vacuolar protein sorting-associated protein 45 OS=Homo sapiens GN=VPS45 PE=1 SV=1;>tr|Q5T4Q0|Q5T4Q0_HUMAN Vacuolar prot	ENSG00000136631	ENSP00000358126;ENSP00000400143	Q5T4Q0_HUMAN;VPS45_HUMAN	Not Sig	logFC < 2.0	UNCERTAIN
128	24.9734	25.3409	25.3658	25.2023	25.5018	25.113	25.3195	25.2237	NA	NA	NA	NA	NA	44	0.227237	0.842001	0.0688891	0.0324651	A0A087WUB9;Q8WYA6;A2A2P1	A0A087WUB9;Q8WYA6	Beta-catenin-like protein 1	CTNNBL1	>tr|A0A087WUB9|A0A087WUB9_HUMAN Beta-catenin-like protein 1 OS=Homo sapiens GN=CTNNBL1 PE=1 SV=1;>sp|Q8WYA6|CTBL1_HUMAN Beta-catenin-like protein 1 OS=Homo sapiens GN=CTNNBL1 PE=1 SV=1	ENSG00000132792	ENSP00000355050;ENSP00000362568;ENSP00000362572	CTBL1_HUMAN	Not Sig	logFC < 2.0	UNCERTAIN
129	25.2485	25.4091	25.3695	25.2369	25.4261	25.1051	25.0547	25.3059	NA	NA	NA	NA	NA	45	0.426955	0.7876	-0.0930295	-0.044365	E9PL01;A0A087WUC6;E9PI68;Q15005;E9PRB9;H0YE04	E9PL01;A0A087WUC6;E9PI68;Q15005;E9PRB9	Signal peptidase complex subunit 2	SPCS2	>tr|E9PL01|E9PL01_HUMAN Signal peptidase complex subunit 2 OS=Homo sapiens GN=SPCS2 PE=1 SV=1;>tr|A0A087WUC6|A0A087WUC6_HUMAN Signal peptidase complex subunit 2 OS=Homo sapiens GN=SPCS2 PE=1 SV=1;>tr|E9PI68|E9PI68_HUMAN Signal peptidase complex subunit 2 O	ENSG00000118363	ENSP00000263672;ENSP00000433439;ENSP00000434248;ENSP00000436759	E9PI68_HUMAN;E9PL01_HUMAN;E9PRB9_HUMAN;SPCS2_HUMAN	Not Sig	logFC < 2.0	UNCERTAIN
130	23.2365	23.1895	23.2807	23.2259	22.3183	23.032	23.0258	23.2628	NA	NA	NA	NA	NA	46	0.777943	0.422078	-0.323381	-0.146621	A0A087WUD1;Q6DD87	A0A087WUD1;Q6DD87	Zinc finger protein 787	ZNF787	>tr|A0A087WUD1|A0A087WUD1_HUMAN Zinc finger protein 787 OS=Homo sapiens GN=ZNF787 PE=1 SV=1;>sp|Q6DD87|ZN787_HUMAN Zinc finger protein 787 OS=Homo sapiens GN=ZNF787 PE=1 SV=3	ENSG00000142409	ENSP00000270459	ZN787_HUMAN	Not Sig	logFC < 2.0	UNCERTAIN
131	28.5464	28.2397	28.0563	28.8799	27.8257	28.3651	28.3386	28.686	NA	NA	NA	NA	NA	48	0.197181	0.732454	-0.126704	-0.0562242	A0A087WUK2;O14979	A0A087WUK2;O14979	Heterogeneous nuclear ribonucleoprotein D-like	HNRNPDL	>tr|A0A087WUK2|A0A087WUK2_HUMAN Heterogeneous nuclear ribonucleoprotein D-like OS=Homo sapiens GN=HNRNPDL PE=1 SV=1;>sp|O14979|HNRDL_HUMAN Heterogeneous nuclear ribonucleoprotein D-like OS=Homo sapiens GN=HNRNPDL PE=1 SV=3	ENSG00000152795	ENSP00000295470;ENSP00000338552;ENSP00000422040	HNRDL_HUMAN	Not Sig	logFC < 2.0	UNCERTAIN
132	23.3095	23.4739	23.043	23.1114	22.5653	22.5565	22.8141	22.937	NA	NA	NA	NA	NA	51	2.04777	0.24766	-0.516253	-0.241711	A0A087WUL0;Q3LXA3;H0YCY6;E9PJG8;I3L252;E9PQR1	A0A087WUL0;Q3LXA3;H0YCY6	Bifunctional ATP-dependent dihydroxyacetone kinase/FAD-AMP lyase (cyclizing);ATP-dependent dihydroxyacetone kinase;FAD-AMP lyase (cyclizing)	DAK	>tr|A0A087WUL0|A0A087WUL0_HUMAN Triokinase/FMN cyclase OS=Homo sapiens GN=TKFC PE=1 SV=1;>sp|Q3LXA3|TKFC_HUMAN Triokinase/FMN cyclase OS=Homo sapiens GN=TKFC PE=1 SV=2;>tr|H0YCY6|H0YCY6_HUMAN Triokinase/FMN cyclase (Fragment) OS=Homo sapiens GN=TKFC PE=1 S	ENSG00000149476	ENSP00000378360;ENSP00000432539	DHAK_HUMAN;H0YCY6_HUMAN	Not Sig	logFC < 2.0	UNCERTAIN
133	26.0497	26.0502	25.8067	26.1258	25.5647	25.5039	25.3444	25.4046	NA	NA	NA	NA	NA	55	3.19956	0.223063	-0.553688	-0.265533	A0A087WUQ6;P07203	A0A087WUQ6;P07203	Glutathione peroxidase 1	GPX1	>tr|A0A087WUQ6|A0A087WUQ6_HUMAN Glutathione peroxidase OS=Homo sapiens GN=GPX1 PE=1 SV=1;>sp|P07203|GPX1_HUMAN Glutathione peroxidase 1 OS=Homo sapiens GN=GPX1 PE=1 SV=4	ENSG00000233276	ENSP00000407375	GPX1_HUMAN	Not Sig	logFC < 2.0	UNCERTAIN
134	27.0772	26.7371	26.6506	27.0527	27.9716	27.0278	26.5823	26.6544	NA	NA	NA	NA	NA	57	0.21209	0.647965	0.179626	0.076847	E7ETK0;A0A087WUS0;P62847	E7ETK0;A0A087WUS0;P62847	40S ribosomal protein S24	RPS24	>tr|E7ETK0|E7ETK0_HUMAN 40S ribosomal protein S24 OS=Homo sapiens GN=RPS24 PE=1 SV=1;>tr|A0A087WUS0|A0A087WUS0_HUMAN 40S ribosomal protein S24 OS=Homo sapiens GN=RPS24 PE=1 SV=1;>sp|P62847|RS24_HUMAN 40S ribosomal protein S24 OS=Homo sapiens GN=RPS24 PE=1	ENSG00000138326	ENSP00000354074;ENSP00000361435;ENSP00000414321;ENSP00000415549	E7ETK0_HUMAN;RS24_HUMAN	Not Sig	logFC < 2.0	UNCERTAIN
135	26.8032	27.316	27.5894	26.7612	27.6069	27.0168	26.8559	26.3146	NA	NA	NA	NA	NA	58	0.200052	0.662426	-0.168871	-0.0723614	A0A087WUT6;O60841	A0A087WUT6;O60841	Eukaryotic translation initiation factor 5B	EIF5B	>tr|A0A087WUT6|A0A087WUT6_HUMAN Eukaryotic translation initiation factor 5B OS=Homo sapiens GN=EIF5B PE=1 SV=1;>sp|O60841|IF2P_HUMAN Eukaryotic translation initiation factor 5B OS=Homo sapiens GN=EIF5B PE=1 SV=4	ENSG00000158417	ENSP00000289371	IF2P_HUMAN	Not Sig	logFC < 2.0	UNCERTAIN
136	22.832	23.1038	22.9258	23.0576	22.063	22.8714	22.8942	23.2785	NA	NA	NA	NA	NA	61	0.328443	0.602258	-0.203057	-0.0897283	A0A087WUX8;A0A087WYF7;Q6UXV4	A0A087WUX8;A0A087WYF7;Q6UXV4	MICOS complex subunit MIC27	APOOL	>tr|A0A087WUX8|A0A087WUX8_HUMAN MICOS complex subunit MIC27 OS=Homo sapiens GN=APOOL PE=1 SV=1;>tr|A0A087WYF7|A0A087WYF7_HUMAN MICOS complex subunit MIC27 OS=Homo sapiens GN=APOOL PE=1 SV=1;>sp|Q6UXV4|MIC27_HUMAN MICOS complex subunit MIC27 OS=Homo sapiens	ENSG00000155008	ENSP00000362268	APOOL_HUMAN	Not Sig	logFC < 2.0	UNCERTAIN
137	24.1901	23.2112	24.2227	20.8718	22.8299	23.794	20.9524	23.8517	NA	NA	NA	NA	NA	62	0.0939091	0.610011	-0.266973	-0.087889	A0A087WV05;Q99417;A0A0D9SEI7	A0A087WV05;Q99417	C-Myc-binding protein	MYCBP	>tr|A0A087WV05|A0A087WV05_HUMAN Uncharacterized protein OS=Homo sapiens PE=4 SV=1;>sp|Q99417|MYCBP_HUMAN C-Myc-binding protein OS=Homo sapiens GN=MYCBP PE=1 SV=3	ENSG00000214114	ENSP00000380702	MYCBP_HUMAN	Not Sig	logFC < 2.0	UNCERTAIN
138	23.0958	22.9173	23.1847	22.9827	23.2477	22.8346	22.8051	22.7444	NA	NA	NA	NA	NA	64	0.482415	0.698182	-0.137186	-0.0644296	A0A087WV25;O95684	A0A087WV25;O95684	FGFR1 oncogene partner	FGFR1OP	>tr|A0A087WV25|A0A087WV25_HUMAN FGFR1 oncogene partner OS=Homo sapiens GN=FGFR1OP PE=1 SV=1;>sp|O95684|FR1OP_HUMAN FGFR1 oncogene partner OS=Homo sapiens GN=FGFR1OP PE=1 SV=1	ENSG00000213066	ENSP00000230248;ENSP00000355812	FR1OP_HUMAN	Not Sig	logFC < 2.0	UNCERTAIN
139	22.7446	20.8989	23.3361	22.4223	22.8603	22.9204	22.6008	22.5093	NA	NA	NA	NA	NA	66	0.294161	0.421023	0.372231	0.147189	A0A087WV52;Q9NP92	A0A087WV52;Q9NP92	28S ribosomal protein S30, mitochondrial	MRPS30	>tr|A0A087WV52|A0A087WV52_HUMAN 28S ribosomal protein S30, mitochondrial OS=Homo sapiens GN=MRPS30 PE=1 SV=1;>sp|Q9NP92|RT30_HUMAN 28S ribosomal protein S30, mitochondrial OS=Homo sapiens GN=MRPS30 PE=1 SV=2	ENSG00000112996	ENSP00000424328	RT30_HUMAN	Not Sig	logFC < 2.0	UNCERTAIN
140	25.8675	25.8038	25.9634	25.9886	25.1294	25.5599	25.8323	25.6915	NA	NA	NA	NA	NA	67	1.17498	0.388577	-0.352557	-0.163389	A0A087WV66;P46013	A0A087WV66;P46013	Antigen KI-67	MKI67	>tr|A0A087WV66|A0A087WV66_HUMAN Antigen KI-67 OS=Homo sapiens GN=MKI67 PE=1 SV=1;>sp|P46013|KI67_HUMAN Antigen KI-67 OS=Homo sapiens GN=MKI67 PE=1 SV=2	ENSG00000148773	ENSP00000357642;ENSP00000357643	KI67_HUMAN	Not Sig	logFC < 2.0	UNCERTAIN
141	25.3458	25.3855	25.6737	25.6359	24.7427	24.8481	25.15	24.8608	NA	NA	NA	NA	NA	68	2.62242	0.200041	-0.609857	-0.287493	A0A087WV73;P46087;F5GYR3;F5H5X6;F5GWB7;F5H709;F5H359;F5H8G6	A0A087WV73;P46087	Probable 28S rRNA (cytosine(4447)-C(5))-methyltransferase	NOP2	>tr|A0A087WV73|A0A087WV73_HUMAN Probable 28S rRNA (cytosine(4447)-C(5))-methyltransferase OS=Homo sapiens GN=NOP2 PE=1 SV=1;>sp|P46087|NOP2_HUMAN Probable 28S rRNA (cytosine(4447)-C(5))-methyltransferase OS=Homo sapiens GN=NOP2 PE=1 SV=2	ENSG00000111641	ENSP00000313272;ENSP00000371858;ENSP00000382392;ENSP00000439422;ENSP00000443150;ENSP00000444437	NOP2_HUMAN	Not Sig	logFC < 2.0	UNCERTAIN
142	23.448	23.1153	23.1407	22.9764	23.1305	23.023	22.7913	22.4176	NA	NA	NA	NA	NA	69	0.893798	0.414304	-0.329474	-0.150686	J3QS48;I3L295;J3KT75;J3QW43;J3QRD5;Q9H3L2;Q1HDL3;A0A087WV81;O75352;I3L1D2;J3KTK8;J3QQZ4;J3KSI4;I3L405;I3L261;I3L4E0	J3QS48;I3L295;J3KT75;J3QW43;J3QRD5;Q9H3L2;Q1HDL3;A0A087WV81;O75352;I3L1D2;J3KTK8;J3QQZ4;J3KSI4;I3L405;I3L261;I3L4E0	Mannose-P-dolichol utilization defect 1 protein	MPDU1;HBEBP2BPA	>tr|J3QS48|J3QS48_HUMAN Mannose-P-dolichol utilization defect 1 protein OS=Homo sapiens GN=MPDU1 PE=1 SV=1;>tr|I3L295|I3L295_HUMAN Mannose-P-dolichol utilization defect 1 isoform 2 OS=Homo sapiens GN=MPDU1 PE=1 SV=1;>tr|J3KT75|J3KT75_HUMAN Mannose-P-dolich	ENSG00000129255	ENSP00000250124;ENSP00000352876;ENSP00000379758;ENSP00000458741;ENSP00000459306;ENSP00000459409;ENSP00000459498;ENSP00000460864;ENSP00000461183;ENSP00000462229;ENSP00000462500;ENSP00000462839;ENSP00000463037;ENSP00000463056;ENSP00000463966;ENSP00000464158;ENSP00000464524	I3L1D2_HUMAN;I3L261_HUMAN;I3L295_HUMAN;I3L405_HUMAN;I3L4E0_HUMAN;J3KSI4_HUMAN;J3KT75_HUMAN;J3KTK8_HUMAN;J3QQZ4_HUMAN;J3QRD5_HUMAN;J3QS48_HUMAN;J3QW43_HUMAN;MPU1_HUMAN;Q1HDL3_HUMAN;Q9H3L2_HUMAN	Not Sig	logFC < 2.0	UNCERTAIN
143	24.4867	24.3584	24.7644	24.6061	23.6276	23.6576	23.8224	24.2312	NA	NA	NA	NA	NA	70	2.33751	0.154843	-0.719193	-0.332395	A0A087WVD4;Q9HBK9	A0A087WVD4;Q9HBK9	Arsenite methyltransferase	AS3MT	>tr|A0A087WVD4|A0A087WVD4_HUMAN Arsenite methyltransferase OS=Homo sapiens GN=AS3MT PE=1 SV=1;>sp|Q9HBK9|AS3MT_HUMAN Arsenite methyltransferase OS=Homo sapiens GN=AS3MT PE=1 SV=3	ENSG00000214435	ENSP00000358896	AS3MT_HUMAN	Not Sig	logFC < 2.0	UNCERTAIN
144	25.7568	25.7743	25.8861	25.549	26.2231	26.1559	26.2145	26.024	NA	NA	NA	NA	NA	71	2.57449	0.315874	0.412844	0.198106	A0A087WVM4;B7ZM99;Q6UB35;H0Y327;Q4VXM0;Q5JYA8;Q5JYA3;Q4VXV2;Q4VXM1	A0A087WVM4;B7ZM99;Q6UB35	Monofunctional C1-tetrahydrofolate synthase, mitochondrial	MTHFD1L	>tr|A0A087WVM4|A0A087WVM4_HUMAN Monofunctional C1-tetrahydrofolate synthase, mitochondrial OS=Homo sapiens GN=MTHFD1L PE=1 SV=1;>tr|B7ZM99|B7ZM99_HUMAN MTHFD1L protein OS=Homo sapiens GN=MTHFD1L PE=1 SV=1;>sp|Q6UB35|C1TM_HUMAN Monofunctional C1-tetrahydrof	ENSG00000120254	ENSP00000356276;ENSP00000356290	B7ZM99_HUMAN;C1TM_HUMAN	Not Sig	logFC < 2.0	UNCERTAIN
145	30.4905	30.6822	30.8761	30.3313	31.0495	30.6645	30.4783	30.0942	NA	NA	NA	NA	NA	72	0.034921	0.960711	-0.0233693	-0.0104745	A0A087WVQ6;Q00610;J3KS13;K7EJJ5;J3KSQ2;J3KRF5;J3QL20;F5H5N6;A0A087WV74;A0A087WXH4	A0A087WVQ6;Q00610	Clathrin heavy chain 1	CLTC	>tr|A0A087WVQ6|A0A087WVQ6_HUMAN Clathrin heavy chain OS=Homo sapiens GN=CLTC PE=1 SV=1;>sp|Q00610|CLH1_HUMAN Clathrin heavy chain 1 OS=Homo sapiens GN=CLTC PE=1 SV=5	ENSG00000141367	ENSP00000269122;ENSP00000376763	CLH1_HUMAN	Not Sig	logFC < 2.0	UNCERTAIN
146	24.1287	23.7668	24.2305	24.0337	24.45	23.7889	23.9694	23.6681	NA	NA	NA	NA	NA	74	0.13458	0.842976	-0.070828	-0.0322154	H7C4X9;A0A087WVZ6;A0A087WYS3;Q9ULU4;A0A087WV57;A0A0A0MTK7	H7C4X9;A0A087WVZ6;A0A087WYS3;Q9ULU4;A0A087WV57;A0A0A0MTK7	Protein kinase C-binding protein 1	ZMYND8	>tr|H7C4X9|H7C4X9_HUMAN Protein kinase C-binding protein 1 (Fragment) OS=Homo sapiens GN=ZMYND8 PE=1 SV=2;>tr|A0A087WVZ6|A0A087WVZ6_HUMAN Protein kinase C-binding protein 1 OS=Homo sapiens GN=ZMYND8 PE=1 SV=2;>tr|A0A087WYS3|A0A087WYS3_HUMAN Protein kinase	ENSG00000101040	ENSP00000262975;ENSP00000312237;ENSP00000335537;ENSP00000348246;ENSP00000354166;ENSP00000418210;ENSP00000418495;ENSP00000420095	H7C4X9_HUMAN;PKCB1_HUMAN	Not Sig	logFC < 2.0	UNCERTAIN
147	23.4906	23.9323	23.9453	23.1666	23.8436	23.6901	23.6364	23.1121	NA	NA	NA	NA	NA	76	0.0935001	0.865541	-0.0631328	-0.0281045	A0A087WW06;Q96AY4;B0QYP5	A0A087WW06;Q96AY4	Tetratricopeptide repeat protein 28	TTC28	>tr|A0A087WW06|A0A087WW06_HUMAN Tetratricopeptide repeat protein 28 OS=Homo sapiens GN=TTC28 PE=1 SV=1;>sp|Q96AY4|TTC28_HUMAN Tetratricopeptide repeat protein 28 OS=Homo sapiens GN=TTC28 PE=1 SV=4	ENSG00000100154	ENSP00000381003	TTC28_HUMAN	Not Sig	logFC < 2.0	UNCERTAIN
148	23.9458	23.717	24.2221	23.6435	24.1936	23.7167	24.3487	23.9454	NA	NA	NA	NA	NA	78	0.387989	0.646498	0.168994	0.077147	A0A087WW40;Q9Y371	A0A087WW40;Q9Y371	Endophilin-B1	SH3GLB1	>tr|A0A087WW40|A0A087WW40_HUMAN Endophilin-B1 OS=Homo sapiens GN=SH3GLB1 PE=1 SV=1;>sp|Q9Y371|SHLB1_HUMAN Endophilin-B1 OS=Homo sapiens GN=SH3GLB1 PE=1 SV=1	ENSG00000097033	ENSP00000212369;ENSP00000418744;ENSP00000441355	SHLB1_HUMAN	Not Sig	logFC < 2.0	UNCERTAIN
149	25.3369	25.53	25.606	25.3969	25.2454	24.765	24.6793	24.6829	NA	NA	NA	NA	NA	81	2.24367	0.195737	-0.624313	-0.290546	A0A087WW77;Q15334	A0A087WW77;Q15334	Lethal(2) giant larvae protein homolog 1	LLGL1	>tr|A0A087WW77|A0A087WW77_HUMAN Lethal(2) giant larvae protein homolog 1 OS=Homo sapiens GN=LLGL1 PE=1 SV=1;>sp|Q15334|L2GL1_HUMAN Lethal(2) giant larvae protein homolog 1 OS=Homo sapiens GN=LLGL1 PE=1 SV=3	ENSG00000131899	ENSP00000321537	L2GL1_HUMAN	Not Sig	logFC < 2.0	UNCERTAIN
150	23.9926	23.8806	24.0669	23.993	24.2826	23.7503	23.5538	23.4005	NA	NA	NA	NA	NA	82	0.563124	0.533199	-0.236481	-0.107678	A0A087WWA3;Q4R9M9;O60333;Q12756;H7C0K6;A0A0U1RQL3	A0A087WWA3;Q4R9M9;O60333	Kinesin-like protein KIF1B	KIF1Bbeta;KIF1B	>tr|A0A087WWA3|A0A087WWA3_HUMAN Kinesin-like protein OS=Homo sapiens GN=KIF1B PE=1 SV=1;>tr|Q4R9M9|Q4R9M9_HUMAN Kinesin-like protein OS=Homo sapiens GN=KIF1Bbeta PE=1 SV=1;>sp|O60333|KIF1B_HUMAN Kinesin-like protein KIF1B OS=Homo sapiens GN=KIF1B PE=1 SV=5	ENSG00000054523	ENSP00000263934;ENSP00000366284;ENSP00000366287;ENSP00000366290;ENSP00000366297	KIF1B_HUMAN;Q4R9M9_HUMAN	Not Sig	logFC < 2.0	UNCERTAIN
151	23.2122	23.3526	23.5101	23.1826	22.9188	23.1259	23.2812	23.2604	NA	NA	NA	NA	NA	84	0.732269	0.637145	-0.167809	-0.0794489	A0A087WWF6;P49005;F8W8R3;C9IZD2;C9J8Z7;C9JLE1;H7C1B3;C9JHC7	A0A087WWF6;P49005;F8W8R3;C9IZD2;C9J8Z7;C9JLE1	DNA polymerase delta subunit 2	POLD2	>tr|A0A087WWF6|A0A087WWF6_HUMAN DNA polymerase delta subunit 2 OS=Homo sapiens GN=POLD2 PE=1 SV=1;>sp|P49005|DPOD2_HUMAN DNA polymerase delta subunit 2 OS=Homo sapiens GN=POLD2 PE=1 SV=1;>tr|F8W8R3|F8W8R3_HUMAN DNA polymerase delta subunit 2 OS=Homo sapien	ENSG00000106628	ENSP00000223361;ENSP00000386105;ENSP00000389816;ENSP00000395231;ENSP00000397461;ENSP00000406702	C9IZD2_HUMAN;C9J8Z7_HUMAN;C9JLE1_HUMAN;DPOD2_HUMAN;F8W8R3_HUMAN	Not Sig	logFC < 2.0	UNCERTAIN
152	22.6056	21.829	20.9172	22.2572	21.9045	21.8832	22.5933	22.1724	NA	NA	NA	NA	NA	86	0.238837	0.565598	0.236102	0.0983569	H0YLB8;A0A087WWM4;F8WAN9;H0YNJ6;Q9P2T1;H0YNS9;H0YNH0;H0YMB3;H0YLV5;H0YKE1	H0YLB8;A0A087WWM4;F8WAN9;H0YNJ6;Q9P2T1;H0YNS9;H0YNH0;H0YMB3;H0YLV5	GMP reductase;GMP reductase 2	GMPR2	>tr|H0YLB8|H0YLB8_HUMAN GMP reductase 2 (Fragment) OS=Homo sapiens GN=GMPR2 PE=1 SV=1;>tr|A0A087WWM4|A0A087WWM4_HUMAN GMP reductase OS=Homo sapiens GN=GMPR2 PE=1 SV=1;>tr|F8WAN9|F8WAN9_HUMAN GMP reductase OS=Homo sapiens GN=GMPR2 PE=1 SV=1;>tr|H0YNJ6|H0YNJ	ENSG00000100938	ENSP00000347449;ENSP00000382369;ENSP00000392859;ENSP00000453139;ENSP00000453299;ENSP00000453355;ENSP00000453537;ENSP00000454009;ENSP00000454038;ENSP00000454138	GMPR2_HUMAN;H0YLB8_HUMAN;H0YLV5_HUMAN;H0YMB3_HUMAN;H0YNH0_HUMAN;H0YNJ6_HUMAN;H0YNS9_HUMAN	Not Sig	logFC < 2.0	UNCERTAIN
153	24.8945	24.9387	24.9044	24.9396	25.1203	24.5684	24.743	24.762	NA	NA	NA	NA	NA	87	0.469783	0.729298	-0.120876	-0.0571146	A0A087WWP4;Q96T37	A0A087WWP4;Q96T37	Putative RNA-binding protein 15	RBM15	>tr|A0A087WWP4|A0A087WWP4_HUMAN Putative RNA-binding protein 15 OS=Homo sapiens GN=RBM15 PE=1 SV=1;>sp|Q96T37|RBM15_HUMAN Putative RNA-binding protein 15 OS=Homo sapiens GN=RBM15 PE=1 SV=2	ENSG00000162775	ENSP00000358799	RBM15_HUMAN	Not Sig	logFC < 2.0	UNCERTAIN
154	21.8057	21.9961	21.9806	21.6912	20.6253	21.1952	20.3724	20.9866	NA	NA	NA	NA	NA	88	2.7923	0.0504567	-1.0735	-0.488487	A0A087WWP7;A0A087X1P0;P23470	A0A087WWP7;A0A087X1P0;P23470	Receptor-type tyrosine-protein phosphatase gamma	PTPRG	>tr|A0A087WWP7|A0A087WWP7_HUMAN Receptor-type tyrosine-protein phosphatase gamma OS=Homo sapiens GN=PTPRG PE=1 SV=1;>tr|A0A087X1P0|A0A087X1P0_HUMAN Receptor-type tyrosine-protein phosphatase gamma OS=Homo sapiens GN=PTPRG PE=1 SV=1;>sp|P23470|PTPRG_HUMAN R	ENSG00000144724	ENSP00000295874;ENSP00000418112	PTPRG_HUMAN	Not Sig	logFC < 2.0	UNCERTAIN
155	23.9453	24.1601	24.3942	23.8819	24.3251	23.6501	23.9154	24.0101	NA	NA	NA	NA	NA	89	0.274087	0.737386	-0.120198	-0.0551036	A0A087WWS1;Q96FV9;R4GMN4;J3KT14;J3KRD7;J3QQZ3;A0A087WY84	A0A087WWS1;Q96FV9	THO complex subunit 1	THOC1	>tr|A0A087WWS1|A0A087WWS1_HUMAN THO complex subunit 1 OS=Homo sapiens GN=THOC1 PE=1 SV=1;>sp|Q96FV9|THOC1_HUMAN THO complex subunit 1 OS=Homo sapiens GN=THOC1 PE=1 SV=1	ENSG00000079134	ENSP00000261600	THOC1_HUMAN	Not Sig	logFC < 2.0	UNCERTAIN
156	26.0628	26.0559	20.3388	25.8999	26.1025	25.9284	19.8702	25.9715	NA	NA	NA	NA	NA	92	0.0197287	0.854751	-0.121214	-0.029652	A0A087WXB0;O15126;A0A087WU14;A0A087WTX8;A0A087WZA6	A0A087WXB0;O15126;A0A087WU14	Secretory carrier-associated membrane protein 1	SCAMP1	>tr|A0A087WXB0|A0A087WXB0_HUMAN Secretory carrier-associated membrane protein 1 OS=Homo sapiens GN=SCAMP1 PE=1 SV=1;>sp|O15126|SCAM1_HUMAN Secretory carrier-associated membrane protein 1 OS=Homo sapiens GN=SCAMP1 PE=1 SV=2;>tr|A0A087WU14|A0A087WU14_HUMAN S	NA	NA	SCAM1_HUMAN	Not Sig	logFC < 2.0	UNCERTAIN
157	23.1523	23.3842	23.3231	22.9215	23.5661	23.1493	23.4452	22.9319	NA	NA	NA	NA	NA	93	0.170388	0.828778	0.0778518	0.0357608	A0A087WXC5;E7ESZ7;O95299;H7C2W5;H7C1Y7;H7C2X4;C9J6X0;Q8N1B9	A0A087WXC5;E7ESZ7;O95299;H7C2W5;H7C1Y7;H7C2X4;C9J6X0	NADH dehydrogenase [ubiquinone] 1 alpha subcomplex subunit 10, mitochondrial	NDUFA10	>tr|A0A087WXC5|A0A087WXC5_HUMAN NADH dehydrogenase [ubiquinone] 1 alpha subcomplex subunit 10, mitochondrial OS=Homo sapiens GN=NDUFA10 PE=1 SV=1;>tr|E7ESZ7|E7ESZ7_HUMAN NADH dehydrogenase [ubiquinone] 1 alpha subcomplex subunit 10, mitochondrial OS=Homo s	ENSG00000130414	ENSP00000252711;ENSP00000385697;ENSP00000403080;ENSP00000408055;ENSP00000408224;ENSP00000411527	C9J6X0_HUMAN;E7ESZ7_HUMAN;H7C1Y7_HUMAN;H7C2W5_HUMAN;H7C2X4_HUMAN;NDUAA_HUMAN	Not Sig	logFC < 2.0	UNCERTAIN
158	20.6719	20.9431	21.2971	20.2828	21.5475	21.9197	21.2704	21.3119	NA	NA	NA	NA	NA	94	1.46857	0.171378	0.713596	0.315612	A0A087WXU5;E7EPF0;A0A0D9SEW3;A0A087WXF8;Q9NP64;A0A087WYF0;A0A087WYV3	A0A087WXU5;E7EPF0;A0A0D9SEW3;A0A087WXF8;Q9NP64;A0A087WYF0;A0A087WYV3	Nucleolar protein of 40 kDa	ZCCHC17	>tr|A0A087WXU5|A0A087WXU5_HUMAN Nucleolar protein of 40 kDa OS=Homo sapiens GN=ZCCHC17 PE=1 SV=1;>tr|E7EPF0|E7EPF0_HUMAN Nucleolar protein of 40 kDa OS=Homo sapiens GN=ZCCHC17 PE=1 SV=2;>tr|A0A0D9SEW3|A0A0D9SEW3_HUMAN Nucleolar protein of 40 kDa OS=Homo sa	ENSG00000121766	ENSP00000343557;ENSP00000362819;ENSP00000391336	E7EPF0_HUMAN;NO40_HUMAN	Not Sig	logFC < 2.0	UNCERTAIN
159	23.9324	23.8825	23.883	23.8886	23.7785	23.7064	23.8364	24.0125	NA	NA	NA	NA	NA	95	0.422175	0.851381	-0.0631781	-0.0305736	A0A087WXI1;Q6NVY1;F8W8A6;B9A058;B8ZZZ0;H7C126;H7C400;H7C1A5	A0A087WXI1;Q6NVY1	3-hydroxyisobutyryl-CoA hydrolase, mitochondrial	HIBCH	>tr|A0A087WXI1|A0A087WXI1_HUMAN 3-hydroxyisobutyryl-CoA hydrolase, mitochondrial OS=Homo sapiens GN=HIBCH PE=1 SV=1;>sp|Q6NVY1|HIBCH_HUMAN 3-hydroxyisobutyryl-CoA hydrolase, mitochondrial OS=Homo sapiens GN=HIBCH PE=1 SV=2	ENSG00000198130	ENSP00000352706;ENSP00000376144	HIBCH_HUMAN	Not Sig	logFC < 2.0	UNCERTAIN
160	23.3031	22.8274	22.8593	23.0902	23.1379	22.8493	23.0574	22.9936	NA	NA	NA	NA	NA	96	0.0283138	0.986426	-0.0104618	-0.00491924	A0A087WXL6;Q9H270;B7Z879;A0A0G2JS92;A0A087X2J4	A0A087WXL6;Q9H270;B7Z879;A0A0G2JS92	Vacuolar protein sorting-associated protein 11 homolog	VPS11	>tr|A0A087WXL6|A0A087WXL6_HUMAN Uncharacterized protein OS=Homo sapiens GN=VPS11 PE=1 SV=1;>sp|Q9H270|VPS11_HUMAN Vacuolar protein sorting-associated protein 11 homolog OS=Homo sapiens GN=VPS11 PE=1 SV=1;>tr|B7Z879|B7Z879_HUMAN Uncharacterized protein OS=H	NA	NA	B7Z879_HUMAN;VPS11_HUMAN	Not Sig	logFC < 2.0	UNCERTAIN
161	27.6404	27.6732	27.9079	27.6497	27.9082	27.5204	27.6647	27.6699	NA	NA	NA	NA	NA	98	0.0962207	0.948543	-0.0269752	-0.0128299	A0A087WXM6;J3QQT2;J3KRX5;A0A0A6YYL6;P18621;J3KRB3;A0A087WWH0;J3QS96;J3QLC8;A0A0A0MRF8;A0A087WY81;J3KSJ0	A0A087WXM6;J3QQT2;J3KRX5;A0A0A6YYL6;P18621;J3KRB3;A0A087WWH0;J3QS96;J3QLC8;A0A0A0MRF8;A0A087WY81	60S ribosomal protein L17	RPL17	>tr|A0A087WXM6|A0A087WXM6_HUMAN 60S ribosomal protein L17 (Fragment) OS=Homo sapiens GN=RPL17 PE=3 SV=1;>tr|J3QQT2|J3QQT2_HUMAN 60S ribosomal protein L17 (Fragment) OS=Homo sapiens GN=RPL17 PE=3 SV=1;>tr|J3KRX5|J3KRX5_HUMAN 60S ribosomal protein L17 (Fragm	ENSG00000265681	ENSP00000461910;ENSP00000462023;ENSP00000462203;ENSP00000462385;ENSP00000462944;ENSP00000463490;ENSP00000463842;ENSP00000463885;ENSP00000464586	J3KRB3_HUMAN;J3KRX5_HUMAN;J3QLC8_HUMAN;J3QQT2_HUMAN;J3QS96_HUMAN;RL17_HUMAN	Not Sig	logFC < 2.0	UNCERTAIN
162	22.4461	22.5063	19.838	19.7727	21.4183	22.3938	22.4124	22.6308	NA	NA	NA	NA	NA	100	0.624886	0.110377	1.07303	0.38087	A0A087WXR7;Q5TBB1;A0A087WZJ6	A0A087WXR7;Q5TBB1	Ribonuclease H2 subunit B	RNASEH2B	>tr|A0A087WXR7|A0A087WXR7_HUMAN Ribonuclease H2 subunit B OS=Homo sapiens GN=RNASEH2B PE=1 SV=2;>sp|Q5TBB1|RNH2B_HUMAN Ribonuclease H2 subunit B OS=Homo sapiens GN=RNASEH2B PE=1 SV=1	ENSG00000136104	ENSP00000337623	RNH2B_HUMAN	Not Sig	logFC < 2.0	UNCERTAIN
163	25.9835	26.0464	25.9934	26.0223	26.6281	26.1634	26.1317	26.1395	NA	NA	NA	NA	NA	101	1.08652	0.496782	0.254277	0.119838	A0A087WXS7;O43681;K7ERW9	A0A087WXS7;O43681	ATPase ASNA1	ASNA1	>tr|A0A087WXS7|A0A087WXS7_HUMAN ATPase ASNA1 OS=Homo sapiens GN=ASNA1 PE=1 SV=1;>sp|O43681|ASNA_HUMAN ATPase ASNA1 OS=Homo sapiens GN=ASNA1 PE=1 SV=2	ENSG00000198356	ENSP00000349887;ENSP00000466379	ASNA_HUMAN	Not Sig	logFC < 2.0	UNCERTAIN
164	26.1618	26.2185	25.9791	26.2611	25.8518	26.2262	26.4826	26.5676	NA	NA	NA	NA	NA	103	0.310554	0.723519	0.126922	0.0584271	A0A087WXZ3;Q9Y5A9;S4R3J8;S4R3V3	A0A087WXZ3;Q9Y5A9	YTH domain-containing family protein 2	YTHDF2	>tr|A0A087WXZ3|A0A087WXZ3_HUMAN YTH domain-containing family protein 2 OS=Homo sapiens GN=YTHDF2 PE=1 SV=1;>sp|Q9Y5A9|YTHD2_HUMAN YTH domain-containing family protein 2 OS=Homo sapiens GN=YTHDF2 PE=1 SV=2	ENSG00000198492	ENSP00000362918;ENSP00000439394;ENSP00000444660	YTHD2_HUMAN	Not Sig	logFC < 2.0	UNCERTAIN
165	22.892	23.0576	23.0438	22.7665	23.2145	20.9458	20.3978	22.5071	NA	NA	NA	NA	NA	104	0.898525	0.0665605	-1.17366	-0.440998	A0A087WY03;E5RFV3	A0A087WY03;E5RFV3	NA	SREK1	>tr|A0A087WY03|A0A087WY03_HUMAN Splicing regulatory glutamine/lysine-rich protein 1 OS=Homo sapiens GN=SREK1 PE=1 SV=1;>tr|E5RFV3|E5RFV3_HUMAN Splicing regulatory glutamine/lysine-rich protein 1 OS=Homo sapiens GN=SREK1 PE=1 SV=1	ENSG00000153914	ENSP00000427935	E5RFV3_HUMAN	Not Sig	logFC < 2.0	UNCERTAIN
166	25.9703	25.7944	25.232	25.7625	25.2527	25.7407	25.7714	26.1521	NA	NA	NA	NA	NA	107	0.0571662	0.921665	0.0394549	0.0175853	A0A087WY55;Q9NP79;Q5TGM0	A0A087WY55;Q9NP79;Q5TGM0	Vacuolar protein sorting-associated protein VTA1 homolog	VTA1	>tr|A0A087WY55|A0A087WY55_HUMAN Chromosome 6 open reading frame 55, isoform CRA_b OS=Homo sapiens GN=VTA1 PE=1 SV=1;>sp|Q9NP79|VTA1_HUMAN Vacuolar protein sorting-associated protein VTA1 homolog OS=Homo sapiens GN=VTA1 PE=1 SV=1;>tr|Q5TGM0|Q5TGM0_HUMAN Vac	ENSG00000009844	ENSP00000356593;ENSP00000356602	Q5TGM0_HUMAN;VTA1_HUMAN	Not Sig	logFC < 2.0	UNCERTAIN
167	26.187	26.1631	26.0927	26.0718	25.909	25.7204	25.6458	25.7929	NA	NA	NA	NA	NA	110	2.93489	0.365267	-0.361641	-0.175345	A0A087WY71;E9PFW3;Q96CW1;C9JJ47;C9JTK4;C9JGT8;C9JJD3;C9JPV8;H7C4C3	A0A087WY71;E9PFW3;Q96CW1;C9JJ47	AP-2 complex subunit mu	AP2M1	>tr|A0A087WY71|A0A087WY71_HUMAN AP-2 complex subunit mu OS=Homo sapiens GN=AP2M1 PE=1 SV=1;>tr|E9PFW3|E9PFW3_HUMAN AP-2 complex subunit mu OS=Homo sapiens GN=AP2M1 PE=1 SV=1;>sp|Q96CW1|AP2M1_HUMAN AP-2 complex subunit mu OS=Homo sapiens GN=AP2M1 PE=1 SV=2;	ENSG00000161203	ENSP00000292807;ENSP00000371894;ENSP00000395438;ENSP00000403362;ENSP00000409081	AP2M1_HUMAN;C9JJ47_HUMAN;E9PFW3_HUMAN	Not Sig	logFC < 2.0	UNCERTAIN
168	26.3824	26.4517	26.1075	26.5378	26.1613	26.6756	26.5306	26.7933	NA	NA	NA	NA	NA	111	0.463663	0.639557	0.17037	0.0786633	D6RFM0;D6RAH7;H9KV45;A0A0A0MQU3;A0A087WY85;P62837;P61077;D6RAW0;D6RA11	D6RFM0;D6RAH7;H9KV45;A0A0A0MQU3;A0A087WY85;P62837;P61077;D6RAW0	Ubiquitin-conjugating enzyme E2 D2;Ubiquitin-conjugating enzyme E2 D3	UBE2D2;UBE2D3	>tr|D6RFM0|D6RFM0_HUMAN Ubiquitin-conjugating enzyme E2 D2 (Fragment) OS=Homo sapiens GN=UBE2D2 PE=3 SV=1;>tr|D6RAH7|D6RAH7_HUMAN Ubiquitin-conjugating enzyme E2 D3 OS=Homo sapiens GN=UBE2D3 PE=1 SV=1;>tr|H9KV45|H9KV45_HUMAN Ubiquitin-conjugating enzyme E2	ENSG00000109332;ENSG00000131508	ENSP00000253815;ENSP00000318494;ENSP00000337208;ENSP00000337262;ENSP00000344069;ENSP00000345285;ENSP00000349722;ENSP00000378280;ENSP00000378282;ENSP00000378283;ENSP00000381717;ENSP00000381718;ENSP00000396901;ENSP00000421904;ENSP00000424359;ENSP00000424710;ENSP00000424941;ENSP00000426523;ENSP00000426586;ENSP00000426620;ENSP00000429613	D6RAH7_HUMAN;D6RAW0_HUMAN;D6RFM0_HUMAN;H9KV45_HUMAN;UB2D2_HUMAN;UB2D3_HUMAN	Not Sig	logFC < 2.0	UNCERTAIN
169	25.1724	25.4977	25.8356	25.1798	25.6776	25.6192	25.4003	24.9496	NA	NA	NA	NA	NA	115	0.0143538	0.98644	-0.00969744	-0.00435205	A0A087WYK8;O43847;B1AKJ5;F5H7V1;G3V1R5;H0Y5G9	A0A087WYK8;O43847;B1AKJ5;F5H7V1;G3V1R5	Nardilysin	NRD1	>tr|A0A087WYK8|A0A087WYK8_HUMAN Protein NRDC OS=Homo sapiens GN=NRDC PE=1 SV=1;>sp|O43847|NRDC_HUMAN Nardilysin OS=Homo sapiens GN=NRD1 PE=1 SV=2;>tr|B1AKJ5|B1AKJ5_HUMAN Nardilysin (N-arginine dibasic convertase), isoform CRA_d OS=Homo sapiens GN=NRDC PE=1	ENSG00000078618	ENSP00000262679;ENSP00000346890;ENSP00000442262;ENSP00000444416	B1AKJ5_HUMAN;F5H7V1_HUMAN;G3V1R5_HUMAN;NRDC_HUMAN	Not Sig	logFC < 2.0	UNCERTAIN
170	23.267	23.7828	23.719	23.3526	24.3304	23.86	23.5114	23.5087	NA	NA	NA	NA	NA	118	0.541334	0.488504	0.272281	0.121917	A0A087WYN9;Q7Z478	A0A087WYN9;Q7Z478	ATP-dependent RNA helicase DHX29	DHX29	>tr|A0A087WYN9|A0A087WYN9_HUMAN ATP-dependent RNA helicase DHX29 OS=Homo sapiens GN=DHX29 PE=1 SV=1;>sp|Q7Z478|DHX29_HUMAN ATP-dependent RNA helicase DHX29 OS=Homo sapiens GN=DHX29 PE=1 SV=2	ENSG00000067248	ENSP00000251636	DHX29_HUMAN	Not Sig	logFC < 2.0	UNCERTAIN
171	22.6629	22.7963	22.5137	20.3086	20.8373	22.679	22.7098	23.2067	NA	NA	NA	NA	NA	119	0.138327	0.54902	0.287813	0.103258	A0A087WYP2;Q8IZQ5;H0YE28;H3BV83	A0A087WYP2;Q8IZQ5;H0YE28	Selenoprotein H	SELH;C11orf31	>tr|A0A087WYP2|A0A087WYP2_HUMAN Selenoprotein H OS=Homo sapiens GN=C11orf31 PE=1 SV=1;>sp|Q8IZQ5|SELH_HUMAN Selenoprotein H OS=Homo sapiens GN=SELH PE=1 SV=2;>tr|H0YE28|H0YE28_HUMAN Selenoprotein H (Fragment) OS=Homo sapiens GN=C11orf31 PE=1 SV=1	ENSG00000211450	ENSP00000373509;ENSP00000434511;ENSP00000434875	H0YE28_HUMAN;SELH_HUMAN	Not Sig	logFC < 2.0	UNCERTAIN
172	25.6971	25.5748	25.3281	25.445	25.4706	25.5438	25.7974	25.9757	NA	NA	NA	NA	NA	120	0.626382	0.61327	0.185655	0.0867086	A0A087WYS1;E7EUC7;Q16851;C9JQU9;C9J6Q0	A0A087WYS1;E7EUC7;Q16851	UTP--glucose-1-phosphate uridylyltransferase	UGP2	>tr|A0A087WYS1|A0A087WYS1_HUMAN UTP--glucose-1-phosphate uridylyltransferase OS=Homo sapiens GN=UGP2 PE=1 SV=1;>tr|E7EUC7|E7EUC7_HUMAN UTP--glucose-1-phosphate uridylyltransferase OS=Homo sapiens GN=UGP2 PE=1 SV=1;>sp|Q16851|UGPA_HUMAN UTP--glucose-1-phosp	ENSG00000169764	ENSP00000338703;ENSP00000377939;ENSP00000411803;ENSP00000420793	E7EUC7_HUMAN;UGPA_HUMAN	Not Sig	logFC < 2.0	UNCERTAIN
173	27.8616	27.9358	27.5053	27.9157	28.0096	27.9678	27.8681	28.0416	NA	NA	NA	NA	NA	121	0.76477	0.637488	0.167197	0.0793229	A0A087WYT3;Q15185;B4DDC6	A0A087WYT3;Q15185;B4DDC6	Prostaglandin E synthase 3	PTGES3	>tr|A0A087WYT3|A0A087WYT3_HUMAN Prostaglandin E synthase 3 OS=Homo sapiens GN=PTGES3 PE=1 SV=1;>sp|Q15185|TEBP_HUMAN Prostaglandin E synthase 3 OS=Homo sapiens GN=PTGES3 PE=1 SV=1;>tr|B4DDC6|B4DDC6_HUMAN Prostaglandin E synthase 3 OS=Homo sapiens GN=PTGES3	ENSG00000110958	ENSP00000262033;ENSP00000389090	B4DDC6_HUMAN;TEBP_HUMAN	Not Sig	logFC < 2.0	UNCERTAIN
174	23.4865	23.7217	23.2717	23.4162	22.9001	22.5796	22.5891	23.0154	NA	NA	NA	NA	NA	122	2.54576	0.160483	-0.702991	-0.327752	A0A087WYU1;Q9Y5X1;A0A087WVE4;A0A087WZW2	A0A087WYU1;Q9Y5X1	Sorting nexin-9	SNX9	>tr|A0A087WYU1|A0A087WYU1_HUMAN Sorting nexin OS=Homo sapiens GN=SNX9 PE=1 SV=1;>sp|Q9Y5X1|SNX9_HUMAN Sorting nexin-9 OS=Homo sapiens GN=SNX9 PE=1 SV=1	ENSG00000130340	ENSP00000376024;ENSP00000446165	SNX9_HUMAN	Not Sig	logFC < 2.0	UNCERTAIN
175	25.9431	25.9062	25.741	25.9362	25.7074	25.7355	25.7456	25.9504	NA	NA	NA	NA	NA	125	0.630296	0.777382	-0.0969362	-0.0467543	A0A087WZ13;E9PAU2;Q8IY67;K7EQG2;K7EKR9;K7ERR4	A0A087WZ13;E9PAU2;Q8IY67	Ribonucleoprotein PTB-binding 1	RAVER1	>tr|A0A087WZ13|A0A087WZ13_HUMAN Ribonucleoprotein PTB-binding 1 OS=Homo sapiens GN=RAVER1 PE=1 SV=1;>tr|E9PAU2|E9PAU2_HUMAN Ribonucleoprotein PTB-binding 1 OS=Homo sapiens GN=RAVER1 PE=1 SV=1;>sp|Q8IY67|RAVR1_HUMAN Ribonucleoprotein PTB-binding 1 OS=Homo s	ENSG00000161847	ENSP00000293677	E9PAU2_HUMAN;RAVR1_HUMAN	Not Sig	logFC < 2.0	UNCERTAIN
176	22.2926	22.4453	22.8115	22.0977	22.4141	22.4927	22.2465	22.1415	NA	NA	NA	NA	NA	126	0.204643	0.806736	-0.0880971	-0.0405847	H0YCW6;A0A087WZ62;Q9H6U8	H0YCW6;A0A087WZ62;Q9H6U8	Alpha-1,2-mannosyltransferase ALG9	ALG9	>tr|H0YCW6|H0YCW6_HUMAN Alpha-1,2-mannosyltransferase ALG9 (Fragment) OS=Homo sapiens GN=ALG9 PE=4 SV=1;>tr|A0A087WZ62|A0A087WZ62_HUMAN Uncharacterized protein OS=Homo sapiens PE=4 SV=1;>sp|Q9H6U8|ALG9_HUMAN Alpha-1,2-mannosyltransferase ALG9 OS=Homo sapie	ENSG00000086848;ENSG00000262577	ENSP00000381090;ENSP00000432442;ENSP00000435517;ENSP00000465238;ENSP00000466066;ENSP00000467759;ENSP00000468731	ALG9_HUMAN;H0YCW6_HUMAN	Not Sig	logFC < 2.0	UNCERTAIN
177	29.5654	29.5902	29.6892	29.8922	29.2487	29.8302	29.8185	30.035	NA	NA	NA	NA	NA	128	0.0968568	0.895828	0.0488496	0.0223614	A0A087WZH7;P29966	A0A087WZH7;P29966	Myristoylated alanine-rich C-kinase substrate	MARCKS	>tr|A0A087WZH7|A0A087WZH7_HUMAN Myristoylated alanine-rich C-kinase substrate OS=Homo sapiens GN=MARCKS PE=1 SV=1;>sp|P29966|MARCS_HUMAN Myristoylated alanine-rich C-kinase substrate OS=Homo sapiens GN=MARCKS PE=1 SV=4	ENSG00000155130	ENSP00000357624	MARCS_HUMAN	Not Sig	logFC < 2.0	UNCERTAIN
178	24.6471	24.5829	24.4499	24.3295	24.3395	24.6096	24.2668	24.4307	NA	NA	NA	NA	NA	129	0.387516	0.793812	-0.0907159	-0.043149	A0A087WZK0;P49366;Q5J8M5;M0R264;M0R1T2;M0R1T4;M0R0V2;M0R0J4;M0QYZ7;M0R253;M0QX43;B4E3M2	A0A087WZK0;P49366;Q5J8M5;M0R264;M0R1T2	Deoxyhypusine synthase	DHPS	>tr|A0A087WZK0|A0A087WZK0_HUMAN Deoxyhypusine synthase OS=Homo sapiens GN=DHPS PE=1 SV=1;>sp|P49366|DHYS_HUMAN Deoxyhypusine synthase OS=Homo sapiens GN=DHPS PE=1 SV=1;>tr|Q5J8M5|Q5J8M5_HUMAN Deoxyhypusine synthase OS=Homo sapiens GN=DHPS PE=1 SV=1;>tr|M0R	ENSG00000095059	ENSP00000210060;ENSP00000221303;ENSP00000472094;ENSP00000472122;ENSP00000472348	DHYS_HUMAN;M0R1T2_HUMAN;M0R264_HUMAN;Q5J8M5_HUMAN	Not Sig	logFC < 2.0	UNCERTAIN
179	24.6243	24.3393	24.2177	24.5065	24.2178	24.3001	24.4865	24.3784	NA	NA	NA	NA	NA	130	0.300671	0.826897	-0.0763063	-0.0362251	A0A087WZN1;O43837;A0A087X2E5;A0A0D9SG66	A0A087WZN1;O43837;A0A087X2E5	Isocitrate dehydrogenase [NAD] subunit beta, mitochondrial	IDH3B	>tr|A0A087WZN1|A0A087WZN1_HUMAN Isocitrate dehydrogenase [NAD] subunit, mitochondrial OS=Homo sapiens GN=IDH3B PE=1 SV=1;>sp|O43837|IDH3B_HUMAN Isocitrate dehydrogenase [NAD] subunit beta, mitochondrial OS=Homo sapiens GN=IDH3B PE=1 SV=2;>tr|A0A087X2E5|A0A	ENSG00000101365	ENSP00000370223;ENSP00000370232;ENSP00000410058	IDH3B_HUMAN	Not Sig	logFC < 2.0	UNCERTAIN
180	24.846	24.5193	24.4455	24.6802	24.7502	24.5071	24.6114	24.8065	NA	NA	NA	NA	NA	131	0.157862	0.896328	0.0460143	0.0217879	X6RJS7;A0A087WZR3;H9KVA9;A0A0D9SF50;P46736	X6RJS7;A0A087WZR3;H9KVA9;A0A0D9SF50;P46736	Lys-63-specific deubiquitinase BRCC36	BRCC3	>tr|X6RJS7|X6RJS7_HUMAN Lys-63-specific deubiquitinase BRCC36 (Fragment) OS=Homo sapiens GN=BRCC3 PE=1 SV=1;>tr|A0A087WZR3|A0A087WZR3_HUMAN Lys-63-specific deubiquitinase BRCC36 OS=Homo sapiens GN=BRCC3 PE=1 SV=1;>tr|H9KVA9|H9KVA9_HUMAN Lys-63-specific deu	ENSG00000185515;ENSG00000269884	ENSP00000328641;ENSP00000344103;ENSP00000358471;ENSP00000358474;ENSP00000381988;ENSP00000381998;ENSP00000413170;ENSP00000469831;ENSP00000469902;ENSP00000470674;ENSP00000471044;ENSP00000472343;ENSP00000473083	BRCC3_HUMAN;H9KVA9_HUMAN	Not Sig	logFC < 2.0	UNCERTAIN
181	22.6915	22.2655	22.0757	23.0487	21.6345	21.8868	22.0065	22.3417	NA	NA	NA	NA	NA	133	1.09579	0.242129	-0.552954	-0.244345	A0A087WZU5;O43657;A0A087WYV6	A0A087WZU5;O43657;A0A087WYV6	Tetraspanin-6	TSPAN6	>tr|A0A087WZU5|A0A087WZU5_HUMAN Tetraspanin-6 OS=Homo sapiens GN=TSPAN6 PE=1 SV=1;>sp|O43657|TSN6_HUMAN Tetraspanin-6 OS=Homo sapiens GN=TSPAN6 PE=1 SV=1;>tr|A0A087WYV6|A0A087WYV6_HUMAN Tetraspanin-6 OS=Homo sapiens GN=TSPAN6 PE=1 SV=1	ENSG00000000003	ENSP00000362111	TSN6_HUMAN	Not Sig	logFC < 2.0	UNCERTAIN
182	23.7162	23.3588	23.3971	23.2227	23.7142	23.5285	23.3439	23.2989	NA	NA	NA	NA	NA	134	0.126712	0.896004	0.0476933	0.0222747	A0A087WZV0;O43314;D6RBU4;H0Y9M0;H0Y9S9;D6RFG4;H7C436;A0A087WWN8	A0A087WZV0;O43314;D6RBU4	Inositol hexakisphosphate and diphosphoinositol-pentakisphosphate kinase 2	PPIP5K2	>tr|A0A087WZV0|A0A087WZV0_HUMAN Inositol hexakisphosphate and diphosphoinositol-pentakisphosphate kinase 2 OS=Homo sapiens GN=PPIP5K2 PE=1 SV=1;>sp|O43314|VIP2_HUMAN Inositol hexakisphosphate and diphosphoinositol-pentakisphosphate kinase 2 OS=Homo sapiens	ENSG00000145725;ENSG00000262234	ENSP00000313070;ENSP00000351126;ENSP00000416016;ENSP00000422525;ENSP00000458792;ENSP00000459756	D6RBU4_HUMAN;VIP2_HUMAN	Not Sig	logFC < 2.0	UNCERTAIN
183	28.0287	27.7884	27.2238	28.3636	27.9754	28.2478	28.3275	28.3746	NA	NA	NA	NA	NA	135	0.725377	0.380364	0.380224	0.16853	D6R9P3;D6RD18;D6RBZ0;A0A087WZV1;Q99729	D6R9P3;D6RD18;D6RBZ0;A0A087WZV1;Q99729	Heterogeneous nuclear ribonucleoprotein A/B	HNRNPAB	>tr|D6R9P3|D6R9P3_HUMAN Heterogeneous nuclear ribonucleoprotein A/B OS=Homo sapiens GN=HNRNPAB PE=1 SV=1;>tr|D6RD18|D6RD18_HUMAN Heterogeneous nuclear ribonucleoprotein A/B OS=Homo sapiens GN=HNRNPAB PE=1 SV=1;>tr|D6RBZ0|D6RBZ0_HUMAN Heterogeneous nuclear	ENSG00000197451	ENSP00000348093;ENSP00000351108;ENSP00000422501;ENSP00000423495;ENSP00000425031;ENSP00000427110;ENSP00000427465	D6R9P3_HUMAN;D6RBZ0_HUMAN;D6RD18_HUMAN;ROAA_HUMAN	Not Sig	logFC < 2.0	UNCERTAIN
184	22.8131	22.7263	22.6032	21.1367	22.7154	22.898	20.6158	23.0152	NA	NA	NA	NA	NA	136	0.00421349	0.989001	-0.00874376	-0.00324661	A0A087WZX2;O95139	A0A087WZX2;O95139	NADH dehydrogenase [ubiquinone] 1 beta subcomplex subunit 6	NDUFB6	>tr|A0A087WZX2|A0A087WZX2_HUMAN NADH dehydrogenase [ubiquinone] 1 beta subcomplex subunit 6 OS=Homo sapiens GN=NDUFB6 PE=1 SV=1;>sp|O95139|NDUB6_HUMAN NADH dehydrogenase [ubiquinone] 1 beta subcomplex subunit 6 OS=Homo sapiens GN=NDUFB6 PE=1 SV=3	ENSG00000165264	ENSP00000297983;ENSP00000369176	NDUB6_HUMAN	Not Sig	logFC < 2.0	UNCERTAIN
185	21.127	22.8375	22.5973	22.6937	22.5739	22.673	22.5573	20.4292	NA	NA	NA	NA	NA	137	0.144038	0.576424	-0.255521	-0.0955509	J3KPF9;A0A087X011;E9PES4;Q9Y496	J3KPF9;A0A087X011;E9PES4;Q9Y496	Kinesin-like protein KIF3A	KIF3A	>tr|J3KPF9|J3KPF9_HUMAN Kinesin-like protein OS=Homo sapiens GN=KIF3A PE=1 SV=1;>tr|A0A087X011|A0A087X011_HUMAN Kinesin-like protein OS=Homo sapiens GN=KIF3A PE=1 SV=1;>tr|E9PES4|E9PES4_HUMAN Kinesin-like protein OS=Homo sapiens GN=KIF3A PE=1 SV=1;>sp|Q9Y4	ENSG00000131437	ENSP00000368009;ENSP00000368020;ENSP00000385808	E9PES4_HUMAN;J3KPF9_HUMAN;KIF3A_HUMAN	Not Sig	logFC < 2.0	UNCERTAIN
186	24.4827	24.2954	24.252	24.6181	23.6956	24.2348	24.5635	24.7576	NA	NA	NA	NA	NA	138	0.153408	0.789049	-0.0991631	-0.0441239	A0A087X020;Q9Y3A5;F8WE72	A0A087X020;Q9Y3A5	Ribosome maturation protein SBDS	SBDS	>tr|A0A087X020|A0A087X020_HUMAN Ribosome maturation protein SBDS OS=Homo sapiens GN=SBDS PE=1 SV=1;>sp|Q9Y3A5|SBDS_HUMAN Ribosome maturation protein SBDS OS=Homo sapiens GN=SBDS PE=1 SV=4	ENSG00000126524	ENSP00000246868	SBDS_HUMAN	Not Sig	logFC < 2.0	UNCERTAIN
187	23.8914	23.8327	24.0001	23.7537	23.7571	23.5443	23.8206	23.7285	NA	NA	NA	NA	NA	140	1.02842	0.654276	-0.156851	-0.0754524	A0A087X0K1;Q9Y376;B7ZBJ4;Q5TAW7;Q9H9S4	A0A087X0K1;Q9Y376	Calcium-binding protein 39	CAB39	>tr|A0A087X0K1|A0A087X0K1_HUMAN Calcium-binding protein 39 OS=Homo sapiens GN=CAB39 PE=1 SV=1;>sp|Q9Y376|CAB39_HUMAN Calcium-binding protein 39 OS=Homo sapiens GN=CAB39 PE=1 SV=1	ENSG00000135932	ENSP00000258418;ENSP00000386238;ENSP00000386642	CAB39_HUMAN	Not Sig	logFC < 2.0	UNCERTAIN
188	23.1813	22.992	23.0137	23.1847	22.948	23.1964	22.9752	23.4636	NA	NA	NA	NA	NA	141	0.155231	0.882339	0.0528803	0.0248201	A0A087X0M4;Q9BWU0;H7C256;A0A087WWF4	A0A087X0M4;Q9BWU0	Kanadaptin	SLC4A1AP	>tr|A0A087X0M4|A0A087X0M4_HUMAN Kanadaptin OS=Homo sapiens GN=SLC4A1AP PE=1 SV=1;>sp|Q9BWU0|NADAP_HUMAN Kanadaptin OS=Homo sapiens GN=SLC4A1AP PE=1 SV=1	ENSG00000163798	ENSP00000323837	NADAP_HUMAN	Not Sig	logFC < 2.0	UNCERTAIN
189	24.7365	24.5724	24.6625	25.1721	24.965	24.9279	25.0633	25.2007	NA	NA	NA	NA	NA	144	0.872428	0.501377	0.253327	0.118028	A0A087X0R6;Q9UMY4	A0A087X0R6;Q9UMY4	Sorting nexin-12	SNX12	>tr|A0A087X0R6|A0A087X0R6_HUMAN Sorting nexin-12 OS=Homo sapiens GN=SNX12 PE=1 SV=1;>sp|Q9UMY4|SNX12_HUMAN Sorting nexin-12 OS=Homo sapiens GN=SNX12 PE=1 SV=3	ENSG00000147164	ENSP00000363392	SNX12_HUMAN	Not Sig	logFC < 2.0	UNCERTAIN
190	22.9992	22.8517	22.0613	22.9708	21.9277	21.9028	21.9084	22.3029	NA	NA	NA	NA	NA	145	1.57872	0.169846	-0.710285	-0.316718	A0A087X0S5;P12109	A0A087X0S5;P12109	Collagen alpha-1(VI) chain	COL6A1	>tr|A0A087X0S5|A0A087X0S5_HUMAN Collagen alpha-1(VI) chain OS=Homo sapiens GN=COL6A1 PE=1 SV=1;>sp|P12109|CO6A1_HUMAN Collagen alpha-1(VI) chain OS=Homo sapiens GN=COL6A1 PE=1 SV=3	ENSG00000142156	ENSP00000355180	CO6A1_HUMAN	Not Sig	logFC < 2.0	UNCERTAIN
191	25.5255	25.5589	25.2567	25.2425	25.8327	25.4644	25.6326	25.6002	NA	NA	NA	NA	NA	147	1.08033	0.517683	0.236538	0.111896	J3KN36;A0A0G2JN29;A0A087X117;Q15155;P69849;Q5JPE7;A0A0G2JP90;A0A087WW46;I3L0Q6;H3BTW1;H3BPS9;H3BUC9	J3KN36;A0A0G2JN29;A0A087X117;Q15155;P69849;Q5JPE7;A0A0G2JP90;A0A087WW46	Nodal modulator 1;Nodal modulator 3;Nodal modulator 2	NOMO3;NOMO1;NOMO2	>tr|J3KN36|J3KN36_HUMAN Nodal modulator 3 OS=Homo sapiens GN=NOMO3 PE=1 SV=1;>tr|A0A0G2JN29|A0A0G2JN29_HUMAN Nodal modulator 1 OS=Homo sapiens GN=NOMO1 PE=1 SV=1;>tr|A0A087X117|A0A087X117_HUMAN Nodal modulator 1 OS=Homo sapiens GN=NOMO1 PE=1 SV=1;>sp|Q1515	ENSG00000103226;ENSG00000103512;ENSG00000185164	ENSP00000263012;ENSP00000287667;ENSP00000331851;ENSP00000370883;ENSP00000382274	J3KN36_HUMAN;NOMO1_HUMAN;NOMO2_HUMAN;NOMO3_HUMAN	Not Sig	logFC < 2.0	UNCERTAIN
192	21.6555	21.7383	22.0274	21.6488	22.631	21.5175	21.4965	21.2489	NA	NA	NA	NA	NA	148	0.0479474	0.915044	-0.0440154	-0.0189627	A0A087X176;Q6ZRP7;H0Y430	A0A087X176;Q6ZRP7;H0Y430	Sulfhydryl oxidase 2;Sulfhydryl oxidase	QSOX2	>tr|A0A087X176|A0A087X176_HUMAN Sulfhydryl oxidase OS=Homo sapiens GN=QSOX2 PE=1 SV=1;>sp|Q6ZRP7|QSOX2_HUMAN Sulfhydryl oxidase 2 OS=Homo sapiens GN=QSOX2 PE=1 SV=3;>tr|H0Y430|H0Y430_HUMAN Sulfhydryl oxidase (Fragment) OS=Homo sapiens GN=QSOX2 PE=1 SV=1	ENSG00000165661;ENSG00000261074	ENSP00000351536;ENSP00000389089;ENSP00000455224	H0Y430_HUMAN;QSOX2_HUMAN	Not Sig	logFC < 2.0	UNCERTAIN
193	25.8906	25.935	25.5755	25.8806	25.7097	25.9936	26.077	26.2812	NA	NA	NA	NA	NA	149	0.646724	0.595686	0.194929	0.0909041	A0A087X1A5;O95793;Q5JW30;Q5JW28	A0A087X1A5;O95793;Q5JW30	Double-stranded RNA-binding protein Staufen homolog 1	STAU1	>tr|A0A087X1A5|A0A087X1A5_HUMAN Double-stranded RNA-binding protein Staufen homolog 1 OS=Homo sapiens GN=STAU1 PE=1 SV=1;>sp|O95793|STAU1_HUMAN Double-stranded RNA-binding protein Staufen homolog 1 OS=Homo sapiens GN=STAU1 PE=1 SV=2;>tr|Q5JW30|Q5JW30_HUMAN	ENSG00000124214	ENSP00000323443;ENSP00000345425;ENSP00000353604;ENSP00000360857;ENSP00000360867;ENSP00000360893;ENSP00000360922	Q5JW30_HUMAN;STAU1_HUMAN	Not Sig	logFC < 2.0	UNCERTAIN
194	22.7208	22.5473	22.1915	22.5934	22.7538	22.5301	22.8596	22.7576	NA	NA	NA	NA	NA	151	0.790763	0.562703	0.212027	0.0994051	B7ZBQ3;A0A087X1F4;Q9H944;A6PVP4;B7ZBQ1	B7ZBQ3;A0A087X1F4;Q9H944;A6PVP4	Mediator of RNA polymerase II transcription subunit 20	MED20	>tr|B7ZBQ3|B7ZBQ3_HUMAN Mediator of RNA polymerase II transcription subunit 20 OS=Homo sapiens GN=MED20 PE=1 SV=1;>tr|A0A087X1F4|A0A087X1F4_HUMAN Mediator of RNA polymerase II transcription subunit 20 OS=Homo sapiens GN=MED20 PE=1 SV=1;>sp|Q9H944|MED20_HUM	ENSG00000124641	ENSP00000265350;ENSP00000377795;ENSP00000386668	A6PVP4_HUMAN;B7ZBQ3_HUMAN;MED20_HUMAN	Not Sig	logFC < 2.0	UNCERTAIN
195	25.3625	25.267	25.0388	25.5605	25.5562	25.1359	25.5011	25.4292	NA	NA	NA	NA	NA	152	0.286027	0.781755	0.0983977	0.0459123	A0A087X1G1;H7BYD0;Q16718;A0A087WXR5;F8WAS3;C9IZN5	A0A087X1G1;H7BYD0;Q16718;A0A087WXR5	NADH dehydrogenase [ubiquinone] 1 alpha subcomplex subunit 5	NDUFA5	>tr|A0A087X1G1|A0A087X1G1_HUMAN NADH dehydrogenase [ubiquinone] 1 alpha subcomplex subunit 5 OS=Homo sapiens GN=NDUFA5 PE=1 SV=1;>tr|H7BYD0|H7BYD0_HUMAN NADH dehydrogenase [ubiquinone] 1 alpha subcomplex subunit 5 (Fragment) OS=Homo sapiens GN=NDUFA5 PE=1	ENSG00000128609	ENSP00000347988;ENSP00000368072	H7BYD0_HUMAN;NDUA5_HUMAN	Not Sig	logFC < 2.0	UNCERTAIN
196	23.6792	23.5182	22.989	23.5485	23.5462	23.7487	23.2832	23.9727	NA	NA	NA	NA	NA	153	0.429252	0.590642	0.203952	0.0922226	A0A087X1G7;A0A0B4J1S4;O60613;A0A087WXL0;A0A0B4J1T0;A8MZD0	A0A087X1G7;A0A0B4J1S4;O60613	15 kDa selenoprotein	2016-09-15	>tr|A0A087X1G7|A0A087X1G7_HUMAN 15 kDa selenoprotein OS=Homo sapiens GN=SEP15 PE=1 SV=1;>tr|A0A0B4J1S4|A0A0B4J1S4_HUMAN 15 kDa selenoprotein OS=Homo sapiens GN=SEP15 PE=1 SV=1;>sp|O60613|SEP15_HUMAN 15 kDa selenoprotein OS=Homo sapiens GN=SEP15 PE=1 SV=3	NA	NA	SEP15_HUMAN	Not Sig	logFC < 2.0	UNCERTAIN
197	22.8857	22.7359	22.5789	22.7071	23.09	22.7243	22.8242	22.56	NA	NA	NA	NA	NA	154	0.22926	0.836062	0.072681	0.0341597	A0A087X1H5;Q15057;A0A0U1RQT1;H7C3K3;H7C3Q8	A0A087X1H5;Q15057;A0A0U1RQT1	Arf-GAP with coiled-coil, ANK repeat and PH domain-containing protein 2	ACAP2	>tr|A0A087X1H5|A0A087X1H5_HUMAN Arf-GAP with coiled-coil, ANK repeat and PH domain-containing protein 2 OS=Homo sapiens GN=ACAP2 PE=1 SV=1;>sp|Q15057|ACAP2_HUMAN Arf-GAP with coiled-coil, ANK repeat and PH domain-containing protein 2 OS=Homo sapiens GN=ACA	ENSG00000114331	ENSP00000324287	ACAP2_HUMAN	Not Sig	logFC < 2.0	UNCERTAIN
198	23.9271	24.4111	24.579	23.6056	23.6941	23.4674	23.4	22.7364	NA	NA	NA	NA	NA	155	1.42358	0.13278	-0.806211	-0.349994	A0A087X1I8;Q7Z3E5;C9JW07;C9J535;H7BZA2;H7C3U7;H7BZY2	A0A087X1I8;Q7Z3E5	LisH domain-containing protein ARMC9	ARMC9	>tr|A0A087X1I8|A0A087X1I8_HUMAN LisH domain-containing protein ARMC9 OS=Homo sapiens GN=ARMC9 PE=1 SV=1;>sp|Q7Z3E5|ARMC9_HUMAN LisH domain-containing protein ARMC9 OS=Homo sapiens GN=ARMC9 PE=1 SV=2	ENSG00000135931	ENSP00000258417	ARMC9_HUMAN	Not Sig	logFC < 2.0	UNCERTAIN
199	24.1772	24.506	24.7765	24.2057	24.8347	24.2716	24.0389	23.8225	NA	NA	NA	NA	NA	157	0.2785	0.64633	-0.174434	-0.0771973	A0A087X1N2;Q03701;C9J9W7	A0A087X1N2;Q03701	CCAAT/enhancer-binding protein zeta	CEBPZ	>tr|A0A087X1N2|A0A087X1N2_HUMAN CCAAT/enhancer-binding protein zeta OS=Homo sapiens GN=CEBPZ PE=1 SV=1;>sp|Q03701|CEBPZ_HUMAN CCAAT/enhancer-binding protein zeta OS=Homo sapiens GN=CEBPZ PE=1 SV=3	ENSG00000115816	ENSP00000234170	CEBPZ_HUMAN	Not Sig	logFC < 2.0	UNCERTAIN
200	23.447	23.4791	23.5264	23.6308	22.7434	23.227	23.3088	23.2838	NA	NA	NA	NA	NA	160	1.46346	0.360653	-0.380054	-0.177641	A0A087X1V3;O15164	A0A087X1V3;O15164	Transcription intermediary factor 1-alpha	TRIM24	>tr|A0A087X1V3|A0A087X1V3_HUMAN Transcription intermediary factor 1-alpha OS=Homo sapiens GN=TRIM24 PE=1 SV=1;>sp|O15164|TIF1A_HUMAN Transcription intermediary factor 1-alpha OS=Homo sapiens GN=TRIM24 PE=1 SV=3	ENSG00000122779	ENSP00000340507;ENSP00000390829	TIF1A_HUMAN	Not Sig	logFC < 2.0	UNCERTAIN
201	24.9608	24.9243	24.5461	24.6425	21.4157	20.3917	24.4705	24.5367	NA	NA	NA	NA	NA	161	0.997277	0.0179718	-2.06479	-0.673653	A0A087X1W2	A0A087X1W2	NA	NA	>tr|A0A087X1W2|A0A087X1W2_HUMAN Protein arginine N-methyltransferase 1 OS=Homo sapiens GN=PRMT1 PE=1 SV=1	NA	NA	NA	Not Sig	logFC > 2.0	UNCERTAIN
202	27.156	26.9247	26.9897	27.1512	26.7295	26.5728	26.8132	27.0686	NA	NA	NA	NA	NA	162	1.14356	0.48844	-0.25935	-0.122401	A0A087X1Z3;Q9UL46;H0YM70;H0YKU2	A0A087X1Z3;Q9UL46;H0YM70	Proteasome activator complex subunit 2	PSME2	>tr|A0A087X1Z3|A0A087X1Z3_HUMAN Proteasome activator complex subunit 2 OS=Homo sapiens GN=PSME2 PE=1 SV=1;>sp|Q9UL46|PSME2_HUMAN Proteasome activator complex subunit 2 OS=Homo sapiens GN=PSME2 PE=1 SV=4;>tr|H0YM70|H0YM70_HUMAN Proteasome activator complex	ENSG00000100911	ENSP00000216802;ENSP00000453487	H0YM70_HUMAN;PSME2_HUMAN	Not Sig	logFC < 2.0	UNCERTAIN
203	23.5779	23.7775	24.1106	23.2966	24.2706	23.9053	23.7511	23.3655	NA	NA	NA	NA	NA	163	0.207278	0.72218	0.132491	0.0587833	A0A087X211;Q8TCG1	A0A087X211;Q8TCG1	Protein CIP2A	KIAA1524	>tr|A0A087X211|A0A087X211_HUMAN Protein CIP2A OS=Homo sapiens GN=KIAA1524 PE=1 SV=1;>sp|Q8TCG1|CIP2A_HUMAN Protein CIP2A OS=Homo sapiens GN=KIAA1524 PE=1 SV=2	ENSG00000163507	ENSP00000295746;ENSP00000419487	CIP2A_HUMAN	Not Sig	logFC < 2.0	UNCERTAIN
204	24.3573	24.5324	24.4544	24.0294	24.989	24.457	24.1925	24.0629	NA	NA	NA	NA	NA	165	0.132529	0.823623	0.0819483	0.0366998	A0A087X256;Q2M389;F8VYH7;F8W1W1;F8VNZ5	A0A087X256;Q2M389	WASH complex subunit 7	KIAA1033	>tr|A0A087X256|A0A087X256_HUMAN WASH complex subunit 7 OS=Homo sapiens GN=KIAA1033 PE=1 SV=1;>sp|Q2M389|WASH7_HUMAN WASH complex subunit 7 OS=Homo sapiens GN=KIAA1033 PE=1 SV=2	ENSG00000136051	ENSP00000328062	WASH7_HUMAN	Not Sig	logFC < 2.0	UNCERTAIN
205	22.8138	22.5511	22.8754	22.1962	22.8704	22.1751	22.1261	20.281	NA	NA	NA	NA	NA	166	0.61561	0.196658	-0.745983	-0.289676	E9PDU5;A0A087X295;Q9NNW5;E9PBK6;Q6PKC6	E9PDU5;A0A087X295;Q9NNW5;E9PBK6	WD repeat-containing protein 6	WDR6	>tr|E9PDU5|E9PDU5_HUMAN WD repeat-containing protein 6 OS=Homo sapiens GN=WDR6 PE=1 SV=1;>tr|A0A087X295|A0A087X295_HUMAN WD repeat-containing protein 6 OS=Homo sapiens GN=WDR6 PE=1 SV=1;>sp|Q9NNW5|WDR6_HUMAN WD repeat-containing protein 6 OS=Homo sapiens G	ENSG00000178252	ENSP00000378857;ENSP00000412195;ENSP00000413432	E9PBK6_HUMAN;E9PDU5_HUMAN;WDR6_HUMAN	Not Sig	logFC < 2.0	UNCERTAIN
206	24.9965	24.8983	24.0572	24.9714	24.2641	24.6422	24.4186	24.7764	NA	NA	NA	NA	NA	167	0.349539	0.594887	-0.205545	-0.0912417	I3L1D4;S4R469;F8VR27;F8VZY7;B0QYV1;B0QYY4;A0A087X2B1;A0A0G2JRA5;J3KNW3;B7Z1U7;F8VZG9;O43251;Q9NWB1;A0A0G2JSB3;B0QYY7;B0QYY6;A0A0G2JRD1;S4R3K7;J3QQZ2;J3QRF4;F8VRS4;A6NFN3;F5H0M1	I3L1D4;S4R469;F8VR27;F8VZY7;B0QYV1;B0QYY4;A0A087X2B1;A0A0G2JRA5;J3KNW3;B7Z1U7;F8VZG9;O43251;Q9NWB1;A0A0G2JSB3;B0QYY7;B0QYY6;A0A0G2JRD1;S4R3K7;J3QQZ2;J3QRF4;F8VRS4;A6NFN3	RNA binding protein fox-1 homolog;RNA binding protein fox-1 homolog 2;RNA binding protein fox-1 homolog 1;RNA binding protein fox-1 homolog 3	RBFOX1;RBFOX2;RBFOX3	>tr|I3L1D4|I3L1D4_HUMAN RNA-binding protein fox-1 homolog 1 (Fragment) OS=Homo sapiens GN=RBFOX1 PE=4 SV=1;>tr|S4R469|S4R469_HUMAN RNA-binding protein fox-1 homolog 2 (Fragment) OS=Homo sapiens GN=RBFOX2 PE=1 SV=1;>tr|F8VR27|F8VR27_HUMAN RNA-binding protei	ENSG00000078328;ENSG00000100320;ENSG00000167281;ENSG00000267483	ENSP00000262829;ENSP00000309117;ENSP00000344196;ENSP00000347855;ENSP00000352328;ENSP00000380470;ENSP00000380472;ENSP00000384944;ENSP00000386177;ENSP00000391269;ENSP00000391670;ENSP00000393262;ENSP00000402745;ENSP00000405651;ENSP00000407855;ENSP00000408395;ENSP00000413035;ENSP00000446842;ENSP00000447281;ENSP00000447717;ENSP00000447753;ENSP00000448496;ENSP00000450031;ENSP00000450402;ENSP00000458748…	B0QYV1_HUMAN;B0QYY4_HUMAN;B0QYY6_HUMAN;B0QYY7_HUMAN;B7Z1U7_HUMAN;F8VR27_HUMAN;F8VRS4_HUMAN;F8VZG9_HUMAN;F8VZY7_HUMAN;I3L1D4_HUMAN;J3KNW3_HUMAN;J3QQZ2_HUMAN;J3QRF4_HUMAN;RFOX1_HUMAN;RFOX2_HUMAN;RFOX3_HUMAN	Not Sig	logFC < 2.0	UNCERTAIN
207	23.274	23.0507	23.1788	23.4581	22.5015	23.138	22.9571	23.4028	NA	NA	NA	NA	NA	168	0.534996	0.529945	-0.240557	-0.108941	A0A087X2D5;Q9BRJ2;A0A0G2JMS5;A0A087WU62	A0A087X2D5;Q9BRJ2;A0A0G2JMS5;A0A087WU62	39S ribosomal protein L45, mitochondrial	MRPL45	>tr|A0A087X2D5|A0A087X2D5_HUMAN 39S ribosomal protein L45, mitochondrial OS=Homo sapiens GN=MRPL45 PE=1 SV=1;>sp|Q9BRJ2|RM45_HUMAN 39S ribosomal protein L45, mitochondrial OS=Homo sapiens GN=MRPL45 PE=1 SV=2;>tr|A0A0G2JMS5|A0A0G2JMS5_HUMAN 39S ribosomal pr	ENSG00000174100;ENSG00000259980	ENSP00000308901;ENSP00000454228	RM45_HUMAN	Not Sig	logFC < 2.0	UNCERTAIN
208	27.5746	27.4698	27.2939	27.5458	27.3371	27.5889	27.531	27.8387	NA	NA	NA	NA	NA	169	0.368448	0.768828	0.102876	0.0485018	A0A087X2I1;P62333;H0YJC0;H0YJS8;H0YJX2;H0YJE9;H0YJT1	A0A087X2I1;P62333	26S protease regulatory subunit 10B	PSMC6	>tr|A0A087X2I1|A0A087X2I1_HUMAN 26S protease regulatory subunit 10B OS=Homo sapiens GN=PSMC6 PE=1 SV=1;>sp|P62333|PRS10_HUMAN 26S protease regulatory subunit 10B OS=Homo sapiens GN=PSMC6 PE=1 SV=1	ENSG00000100519	ENSP00000401802	PRS10_HUMAN	Not Sig	logFC < 2.0	UNCERTAIN
209	24.561	24.7525	24.904	24.0606	25.6517	24.9862	24.8413	24.7119	NA	NA	NA	NA	NA	170	0.865441	0.300434	0.478257	0.209933	A0A096LNH6;Q14185	A0A096LNH6;Q14185	Dedicator of cytokinesis protein 1	DOCK1	>tr|A0A096LNH6|A0A096LNH6_HUMAN Dedicator of cytokinesis protein 1 OS=Homo sapiens GN=DOCK1 PE=1 SV=1;>sp|Q14185|DOCK1_HUMAN Dedicator of cytokinesis protein 1 OS=Homo sapiens GN=DOCK1 PE=1 SV=2	ENSG00000150760	ENSP00000280333	DOCK1_HUMAN	Not Sig	logFC < 2.0	UNCERTAIN
210	25.2926	25.0933	25.2146	25.3256	25.1208	25.1642	24.9598	25.1516	NA	NA	NA	NA	NA	171	0.968586	0.700765	-0.132442	-0.0639803	C9JFE4;A0A096LP07;A0A096LPJ3;A8K070;Q13098;J3KSA5;J3QS88;J3KTB0;J3QLT0;J3KRJ4;J3QQX0;J3QS84;J3QLE8;J3QL53;J3KRE8	C9JFE4;A0A096LP07;A0A096LPJ3;A8K070;Q13098	COP9 signalosome complex subunit 1	GPS1	>tr|C9JFE4|C9JFE4_HUMAN COP9 signalosome complex subunit 1 OS=Homo sapiens GN=GPS1 PE=1 SV=2;>tr|A0A096LP07|A0A096LP07_HUMAN COP9 signalosome complex subunit 1 OS=Homo sapiens GN=GPS1 PE=1 SV=1;>tr|A0A096LPJ3|A0A096LPJ3_HUMAN COP9 signalosome complex subun	ENSG00000169727	ENSP00000302873;ENSP00000313569;ENSP00000347251;ENSP00000376167;ENSP00000462265	A8K070_HUMAN;C9JFE4_HUMAN;CSN1_HUMAN	Not Sig	logFC < 2.0	UNCERTAIN
211	23.0163	22.7003	22.9662	22.8313	23.0953	22.6795	22.7102	22.8	NA	NA	NA	NA	NA	172	0.189638	0.870539	-0.0572572	-0.0270268	A0A096LP25;A0A096LNZ0;Q6ZSR9	A0A096LP25;A0A096LNZ0;Q6ZSR9	Uncharacterized protein FLJ45252	NA	>tr|A0A096LP25|A0A096LP25_HUMAN AP2-associated protein kinase 1 (Fragment) OS=Homo sapiens GN=AAK1 PE=1 SV=1;>tr|A0A096LNZ0|A0A096LNZ0_HUMAN AP2-associated protein kinase 1 (Fragment) OS=Homo sapiens GN=AAK1 PE=1 SV=5;>sp|Q6ZSR9|YJ005_HUMAN Uncharacterized	NA	NA	YJ005_HUMAN	Not Sig	logFC < 2.0	UNCERTAIN
212	23.0121	23.04	20.3642	20.1589	22.7577	23.1375	23.2178	23.5789	NA	NA	NA	NA	NA	173	0.957322	0.0368889	1.52915	0.542883	A0A096LP26;A0A096LP75;C4AMC7;Q6VEQ5;A0A096LNU2;A8K0Z3;Q9NQA3;A8MWX3	A0A096LP26;A0A096LP75;C4AMC7;Q6VEQ5;A0A096LNU2;A8K0Z3	Putative WAS protein family homolog 3;WAS protein family homolog 2;WAS protein family homolog 1	WASH3P;WASH2P;WASH1	>tr|A0A096LP26|A0A096LP26_HUMAN Protein LOC102723897 OS=Homo sapiens GN=LOC102723897 PE=4 SV=1;>tr|A0A096LP75|A0A096LP75_HUMAN Protein LOC102723897 OS=Homo sapiens GN=LOC102723897 PE=4 SV=1;>sp|C4AMC7|WASH3_HUMAN Putative WAS protein family homolog 3 OS=Ho	NA	NA	WASH1_HUMAN;WASH2_HUMAN;WASH3_HUMAN	Not Sig	logFC < 2.0	UNCERTAIN
213	26.2561	26.2002	25.8546	26.1065	25.8219	25.9377	25.9876	26.0891	NA	NA	NA	NA	NA	174	0.668171	0.678085	-0.145263	-0.0690178	A0A096LPI6;H7C1F6;A0A0B4J2D5;P30042;A0A096LNH5;H7C2G3;A0A0B4J2H4;A0A096LNJ1;A0A096LP73;F2Z2Q0;A0A096LP12;A0A0B4J2E5;Q15269	A0A096LPI6;H7C1F6;A0A0B4J2D5;P30042;A0A096LNH5;H7C2G3;A0A0B4J2H4	ES1 protein homolog, mitochondrial	C21orf33	>tr|A0A096LPI6|A0A096LPI6_HUMAN Uncharacterized protein (Fragment) OS=Homo sapiens PE=4 SV=2;>tr|H7C1F6|H7C1F6_HUMAN ES1 protein homolog, mitochondrial (Fragment) OS=Homo sapiens GN=C21orf33 PE=1 SV=1;>tr|A0A0B4J2D5|A0A0B4J2D5_HUMAN Protein LOC102724023 OS	ENSG00000160221	ENSP00000291577;ENSP00000344901;ENSP00000400044;ENSP00000405713	ES1_HUMAN;H7C1F6_HUMAN;H7C2G3_HUMAN	Not Sig	logFC < 2.0	UNCERTAIN
214	20.8758	21.6549	21.8223	21.6002	21.8558	22.4205	22.4136	21.84	NA	NA	NA	NA	NA	175	1.28447	0.201201	0.644179	0.284241	A0A0A0MQR1;Q9Y4K4	A0A0A0MQR1;Q9Y4K4	Mitogen-activated protein kinase kinase kinase kinase 5	MAP4K5	>tr|A0A0A0MQR1|A0A0A0MQR1_HUMAN Mitogen-activated protein kinase kinase kinase kinase OS=Homo sapiens GN=MAP4K5 PE=1 SV=1;>sp|Q9Y4K4|M4K5_HUMAN Mitogen-activated protein kinase kinase kinase kinase 5 OS=Homo sapiens GN=MAP4K5 PE=1 SV=1	ENSG00000012983	ENSP00000013125	M4K5_HUMAN	Not Sig	logFC < 2.0	UNCERTAIN
215	22.0703	21.8282	21.8619	22.0328	20.7484	21.7557	21.7227	21.7522	NA	NA	NA	NA	NA	176	0.896164	0.310885	-0.453546	-0.201027	A0A0A0MQR2;Q9BY42;A2A2L5;A2A2L6	A0A0A0MQR2;Q9BY42;A2A2L5	Protein RTF2 homolog	RTFDC1	>tr|A0A0A0MQR2|A0A0A0MQR2_HUMAN Protein RTF2 homolog OS=Homo sapiens GN=RTFDC1 PE=1 SV=1;>sp|Q9BY42|RTF2_HUMAN Protein RTF2 homolog OS=Homo sapiens GN=RTFDC1 PE=1 SV=3;>tr|A2A2L5|A2A2L5_HUMAN Protein RTF2 homolog (Fragment) OS=Homo sapiens GN=RTFDC1 PE=1 S	ENSG00000022277	ENSP00000023939;ENSP00000400322	A2A2L5_HUMAN;RTF2_HUMAN	Not Sig	logFC < 2.0	UNCERTAIN
216	25.006	25.5296	25.2924	24.8077	25.5446	24.9088	25.0882	25.0525	NA	NA	NA	NA	NA	178	0.0168306	0.985642	-0.0104332	-0.00472092	U3KQC1;A0A0A0MQU0;Q9BV38;K7EIR0;K7EML4;A0A087X237;K7EKX5	U3KQC1;A0A0A0MQU0;Q9BV38;K7EIR0	WD repeat-containing protein 18	WDR18	>tr|U3KQC1|U3KQC1_HUMAN WD repeat-containing protein 18 (Fragment) OS=Homo sapiens GN=WDR18 PE=1 SV=1;>tr|A0A0A0MQU0|A0A0A0MQU0_HUMAN WD repeat-containing protein 18 (Fragment) OS=Homo sapiens GN=WDR18 PE=1 SV=1;>sp|Q9BV38|WDR18_HUMAN WD repeat-containing	ENSG00000065268	ENSP00000251289;ENSP00000464855	K7EIR0_HUMAN;WDR18_HUMAN	Not Sig	logFC < 2.0	UNCERTAIN
217	22.6434	22.6496	22.6563	22.8227	23.116	22.8634	22.749	23.3363	NA	NA	NA	NA	NA	179	1.23509	0.413318	0.323154	0.151122	A0A0A0MQU4;Q96I15;H7C3V9;H7C277;H7C1S7;H7C1N7;C9JNL5	A0A0A0MQU4;Q96I15;H7C3V9;H7C277;H7C1S7	Selenocysteine lyase	SCLY	>tr|A0A0A0MQU4|A0A0A0MQU4_HUMAN Selenocysteine lyase OS=Homo sapiens GN=SCLY PE=1 SV=1;>sp|Q96I15|SCLY_HUMAN Selenocysteine lyase OS=Homo sapiens GN=SCLY PE=1 SV=4;>tr|H7C3V9|H7C3V9_HUMAN Selenocysteine lyase (Fragment) OS=Homo sapiens GN=SCLY PE=1 SV=1;>t	ENSG00000132330	ENSP00000254663;ENSP00000387162;ENSP00000402078;ENSP00000404444;ENSP00000414053;ENSP00000450613	H7C1S7_HUMAN;H7C277_HUMAN;H7C3V9_HUMAN;SCLY_HUMAN	Not Sig	logFC < 2.0	UNCERTAIN
218	23.0379	23.0704	23.083	20.5299	23.0614	21.2065	21.2105	20.6483	NA	NA	NA	NA	NA	180	0.498611	0.168302	-0.898649	-0.318231	E9PEW5;A0A0A0MQX1;Q9HD67	E9PEW5;A0A0A0MQX1;Q9HD67	Unconventional myosin-X	MYO10	>tr|E9PEW5|E9PEW5_HUMAN Unconventional myosin-X OS=Homo sapiens GN=MYO10 PE=1 SV=1;>tr|A0A0A0MQX1|A0A0A0MQX1_HUMAN Unconventional myosin-X OS=Homo sapiens GN=MYO10 PE=1 SV=1;>sp|Q9HD67|MYO10_HUMAN Unconventional myosin-X OS=Homo sapiens GN=MYO10 PE=1 SV=3	ENSG00000145555	ENSP00000421170;ENSP00000421280;ENSP00000425051	E9PEW5_HUMAN;MYO10_HUMAN	Not Sig	logFC < 2.0	UNCERTAIN
219	22.464	20.3182	22.6842	22.9557	22.112	20.2444	20.5243	22.1665	NA	NA	NA	NA	NA	181	0.485518	0.181111	-0.8437	-0.302335	C9JP00;A0A0A0MQX8;Q9NR56;O95205;H7C4T5;Q86VM6;Q5VZF2	C9JP00;A0A0A0MQX8;Q9NR56;O95205;H7C4T5;Q86VM6;Q5VZF2	Muscleblind-like protein 1;Muscleblind-like protein 2	MBNL1;MBLL;MBNL2	>tr|C9JP00|C9JP00_HUMAN Muscleblind-like protein 1 OS=Homo sapiens GN=MBNL1 PE=1 SV=1;>tr|A0A0A0MQX8|A0A0A0MQX8_HUMAN Muscleblind-like protein 1 OS=Homo sapiens GN=MBNL1 PE=1 SV=1;>sp|Q9NR56|MBNL1_HUMAN Muscleblind-like protein 1 OS=Homo sapiens GN=MBNL1 P	ENSG00000139793;ENSG00000152601	ENSP00000267287;ENSP00000282486;ENSP00000282488;ENSP00000319374;ENSP00000319429;ENSP00000344214;ENSP00000347637;ENSP00000350064;ENSP00000365861;ENSP00000380726;ENSP00000417630;ENSP00000418108;ENSP00000418109;ENSP00000418427;ENSP00000418876;ENSP00000419347;ENSP00000420103;ENSP00000420327;ENSP00000432422;ENSP00000437491	C9JP00_HUMAN;H7C4T5_HUMAN;MBNL1_HUMAN;MBNL2_HUMAN;O95205_HUMAN;Q86VM6_HUMAN	Not Sig	logFC < 2.0	UNCERTAIN
220	28.1536	28.2318	28.2726	28.2682	28.1761	28.3967	28.3019	28.2842	NA	NA	NA	NA	NA	182	0.502466	0.863971	0.0581169	0.028309	A0A0A0MR02;P45880;Q5JSD2;Q5JSD1;A2A3S1	A0A0A0MR02;P45880;Q5JSD2;Q5JSD1	Voltage-dependent anion-selective channel protein 2	VDAC2	>tr|A0A0A0MR02|A0A0A0MR02_HUMAN Voltage-dependent anion-selective channel protein 2 (Fragment) OS=Homo sapiens GN=VDAC2 PE=1 SV=1;>sp|P45880|VDAC2_HUMAN Voltage-dependent anion-selective channel protein 2 OS=Homo sapiens GN=VDAC2 PE=1 SV=2;>tr|Q5JSD2|Q5JSD	ENSG00000165637	ENSP00000298468;ENSP00000344876;ENSP00000361635;ENSP00000361686;ENSP00000401492;ENSP00000443092	Q5JSD1_HUMAN;Q5JSD2_HUMAN;VDAC2_HUMAN	Not Sig	logFC < 2.0	UNCERTAIN
221	25.5316	25.404	25.4367	25.5265	25.4102	25.5706	25.7805	25.7909	NA	NA	NA	NA	NA	185	0.846037	0.642872	0.163343	0.0779004	A0A0A0MR39;A0A087WUT0;A0A0A0MQW0;Q9P2K5;A0A0C4DGV1;H0YKS1;H0YN19;A0A087WWC8	A0A0A0MR39;A0A087WUT0;A0A0A0MQW0;Q9P2K5;A0A0C4DGV1	Myelin expression factor 2	MYEF2	>tr|A0A0A0MR39|A0A0A0MR39_HUMAN Myelin expression factor 2 OS=Homo sapiens GN=MYEF2 PE=1 SV=1;>tr|A0A087WUT0|A0A087WUT0_HUMAN Myelin expression factor 2 OS=Homo sapiens GN=MYEF2 PE=1 SV=1;>tr|A0A0A0MQW0|A0A0A0MQW0_HUMAN Myelin expression factor 2 OS=Homo s	ENSG00000104177	ENSP00000267836;ENSP00000316950;ENSP00000452913;ENSP00000453125	MYEF2_HUMAN	Not Sig	logFC < 2.0	UNCERTAIN
222	21.1569	21.2169	21.1773	21.2319	22.2074	21.0601	21.1025	20.9473	NA	NA	NA	NA	NA	187	0.176109	0.725425	0.133577	0.0582025	G8JL96;A0A0A0MR60;Q13332;H0Y380;H0Y4H1;H0Y7Z9;Q3KPI9;F5GWR7;H0Y6Z7;P10586;P23468	G8JL96;A0A0A0MR60;Q13332;H0Y380;H0Y4H1;H0Y7Z9;Q3KPI9;F5GWR7;H0Y6Z7;P10586;P23468	Receptor-type tyrosine-protein phosphatase S;Receptor-type tyrosine-protein phosphatase F;Receptor-type tyrosine-protein phosphatase delta	PTPRS;PTPRF;PTPRD	>tr|G8JL96|G8JL96_HUMAN Receptor-type tyrosine-protein phosphatase S OS=Homo sapiens GN=PTPRS PE=1 SV=2;>tr|A0A0A0MR60|A0A0A0MR60_HUMAN Receptor-type tyrosine-protein phosphatase S OS=Homo sapiens GN=PTPRS PE=1 SV=1;>sp|Q13332|PTPRS_HUMAN Receptor-type tyr	ENSG00000105426;ENSG00000142949;ENSG00000153707	ENSP00000262963;ENSP00000269907;ENSP00000327313;ENSP00000347373;ENSP00000348812;ENSP00000349932;ENSP00000353030;ENSP00000361484;ENSP00000361490;ENSP00000361491;ENSP00000370593;ENSP00000380731;ENSP00000380741;ENSP00000391764;ENSP00000398822;ENSP00000408952;ENSP00000416343;ENSP00000417093;ENSP00000438164;ENSP00000465443;ENSP00000467398;ENSP00000467537	F5GWR7_HUMAN;G8JL96_HUMAN;H0Y380_HUMAN;H0Y4H1_HUMAN;H0Y6Z7_HUMAN;H0Y7Z9_HUMAN;PTPRD_HUMAN;PTPRF_HUMAN;PTPRS_HUMAN;Q3KPI9_HUMAN	Not Sig	logFC < 2.0	UNCERTAIN
223	25.1312	24.8331	24.9734	24.9297	24.9615	25.1355	25.185	24.9089	NA	NA	NA	NA	NA	188	0.388352	0.817416	0.0808525	0.0386652	A0A0A0MR66;P98175	A0A0A0MR66;P98175	RNA-binding protein 10	RBM10	>tr|A0A0A0MR66|A0A0A0MR66_HUMAN RNA binding motif protein 10, isoform CRA_d OS=Homo sapiens GN=RBM10 PE=1 SV=1;>sp|P98175|RBM10_HUMAN RNA-binding protein 10 OS=Homo sapiens GN=RBM10 PE=1 SV=3	ENSG00000182872	ENSP00000328848;ENSP00000329659;ENSP00000366829	RBM10_HUMAN	Not Sig	logFC < 2.0	UNCERTAIN
224	27.1227	27.0188	26.6856	27.0342	26.8743	27.1017	27.2055	27.2998	NA	NA	NA	NA	NA	192	0.54249	0.660526	0.154976	0.0726708	A0A0A0MRA5;B7Z4B8;Q9BUJ2;M0R3F1;M0QYZ0;M0R0K8;M0QYI8;M0R203;M0QZV6;M0QYM5	A0A0A0MRA5;B7Z4B8;Q9BUJ2;M0R3F1;M0QYZ0	Heterogeneous nuclear ribonucleoprotein U-like protein 1	HNRNPUL1	>tr|A0A0A0MRA5|A0A0A0MRA5_HUMAN Heterogeneous nuclear ribonucleoprotein U-like protein 1 OS=Homo sapiens GN=HNRNPUL1 PE=1 SV=1;>tr|B7Z4B8|B7Z4B8_HUMAN Heterogeneous nuclear ribonucleoprotein U-like protein 1 OS=Homo sapiens GN=HNRNPUL1 PE=1 SV=1;>sp|Q9BUJ2	ENSG00000105323	ENSP00000263367;ENSP00000367460;ENSP00000375863;ENSP00000470172;ENSP00000470687;ENSP00000472629;ENSP00000473132;ENSP00000473178	B7Z4B8_HUMAN;HNRL1_HUMAN;M0QYZ0_HUMAN;M0R3F1_HUMAN	Not Sig	logFC < 2.0	UNCERTAIN
225	22.5493	22.6315	20.2172	22.6041	22.863	23.1652	22.8327	23.2423	NA	NA	NA	NA	NA	194	0.852699	0.0991913	1.02528	0.393773	A0A0A0MRB7;X6REB3;P15923;K7ENH8;K7ENI0;A0A0A0MTS0;K7EPS2;K7EKB9;K7ERZ7;K7ELF3;K7EMM4	A0A0A0MRB7;X6REB3;P15923;K7ENH8	Transcription factor E2-alpha	TCF3	>tr|A0A0A0MRB7|A0A0A0MRB7_HUMAN Transcription factor E2-alpha OS=Homo sapiens GN=TCF3 PE=1 SV=1;>tr|X6REB3|X6REB3_HUMAN Transcription factor E2-alpha OS=Homo sapiens GN=TCF3 PE=1 SV=2;>sp|P15923|TFE2_HUMAN Transcription factor E2-alpha OS=Homo sapiens GN=T	ENSG00000071564	ENSP00000262965;ENSP00000344375;ENSP00000465510;ENSP00000466952;ENSP00000468487	K7ENH8_HUMAN;TFE2_HUMAN	Not Sig	logFC < 2.0	UNCERTAIN
226	21.1272	19.8154	21.3633	21.038	22.3539	21.3702	21.519	21.6765	NA	NA	NA	NA	NA	195	1.14443	0.117363	0.893945	0.371024	A0A0A0MRE5;Q9ULH1;H0YBF7;H0YBM4	A0A0A0MRE5;Q9ULH1;H0YBF7;H0YBM4	Arf-GAP with SH3 domain, ANK repeat and PH domain-containing protein 1	ASAP1	>tr|A0A0A0MRE5|A0A0A0MRE5_HUMAN Arf-GAP with SH3 domain, ANK repeat and PH domain-containing protein 1 OS=Homo sapiens GN=ASAP1 PE=1 SV=1;>sp|Q9ULH1|ASAP1_HUMAN Arf-GAP with SH3 domain, ANK repeat and PH domain-containing protein 1 OS=Homo sapiens GN=ASAP1	ENSG00000153317	ENSP00000350297;ENSP00000429391;ENSP00000429829;ENSP00000429900	ASAP1_HUMAN;H0YBF7_HUMAN;H0YBM4_HUMAN	Not Sig	logFC < 2.0	UNCERTAIN
227	23.6326	23.7147	23.874	23.142	22.8167	22.8572	23.0678	22.9481	NA	NA	NA	NA	NA	196	2.1448	0.178053	-0.668356	-0.308379	A0A0A0MRG2;E9PG40;P05067;H7C0V9;H7C2L2	A0A0A0MRG2;E9PG40;P05067;H7C0V9	Amyloid beta A4 protein;N-APP;Soluble APP-alpha;Soluble APP-beta;C99;Beta-amyloid protein 42;Beta-amyloid protein 40;C83;P3(42);P3(40);C80;Gamma-secretase C-terminal fragment 59;Gamma-secretase C-terminal fragment 57;Gamma-secretase C-terminal fragment 50;C31	APP	>tr|A0A0A0MRG2|A0A0A0MRG2_HUMAN Amyloid beta A4 protein OS=Homo sapiens GN=APP PE=1 SV=1;>tr|E9PG40|E9PG40_HUMAN Amyloid beta A4 protein OS=Homo sapiens GN=APP PE=1 SV=1;>sp|P05067|A4_HUMAN Amyloid beta A4 protein OS=Homo sapiens GN=APP PE=1 SV=3;>tr|H7C0V	ENSG00000142192	ENSP00000284981;ENSP00000345463;ENSP00000346129;ENSP00000350578;ENSP00000351796;ENSP00000352760;ENSP00000387483;ENSP00000396923;ENSP00000398879	A4_HUMAN;E9PG40_HUMAN;H7C0V9_HUMAN	Not Sig	logFC < 2.0	UNCERTAIN
228	24.8602	24.802	24.8439	24.9229	24.8643	25.1141	25.2342	25.4563	NA	NA	NA	NA	NA	199	1.31022	0.423272	0.309999	0.145821	A0A0A0MRI2;Q9UNH7;G3V5X9;H0YJF8;G3V4Z5;G3V5U2;Q86XE0	A0A0A0MRI2;Q9UNH7;G3V5X9	Sorting nexin-6;Sorting nexin-6, N-terminally processed	SNX6	>tr|A0A0A0MRI2|A0A0A0MRI2_HUMAN Sorting nexin 6, isoform CRA_b OS=Homo sapiens GN=SNX6 PE=1 SV=1;>sp|Q9UNH7|SNX6_HUMAN Sorting nexin-6 OS=Homo sapiens GN=SNX6 PE=1 SV=1;>tr|G3V5X9|G3V5X9_HUMAN Sorting nexin-6 (Fragment) OS=Homo sapiens GN=SNX6 PE=1 SV=1	ENSG00000129515	ENSP00000379779;ENSP00000379785;ENSP00000452577	G3V5X9_HUMAN;SNX6_HUMAN	Not Sig	logFC < 2.0	UNCERTAIN
229	22.0242	21.7139	21.5423	21.6098	21.0529	21.487	21.3174	21.3434	NA	NA	NA	NA	NA	200	1.63172	0.31787	-0.422382	-0.197394	A0A0A0MRJ3;Q8NEY1;H0Y6F6	A0A0A0MRJ3;Q8NEY1;H0Y6F6	Neuron navigator 1	NAV1	>tr|A0A0A0MRJ3|A0A0A0MRJ3_HUMAN Neuron navigator 1 OS=Homo sapiens GN=NAV1 PE=1 SV=1;>sp|Q8NEY1|NAV1_HUMAN Neuron navigator 1 OS=Homo sapiens GN=NAV1 PE=1 SV=2;>tr|H0Y6F6|H0Y6F6_HUMAN Neuron navigator 1 (Fragment) OS=Homo sapiens GN=NAV1 PE=1 SV=1	ENSG00000134369	ENSP00000295624;ENSP00000356264;ENSP00000356265;ENSP00000356266;ENSP00000356269;ENSP00000356271;ENSP00000405437	H0Y6F6_HUMAN;NAV1_HUMAN	Not Sig	logFC < 2.0	UNCERTAIN
230	26.9893	26.8116	26.4884	27.0295	26.6941	26.7949	26.8952	27.1393	NA	NA	NA	NA	NA	201	0.122585	0.888819	0.0511141	0.0237095	A0A0A0MRJ6;H7BY58;P22061;F6S8N6;C9J0F2;F8WDT3;F8WAV5;F8WAX2;H7C4X2	A0A0A0MRJ6;H7BY58;P22061;F6S8N6	Protein-L-isoaspartate O-methyltransferase;Protein-L-isoaspartate(D-aspartate) O-methyltransferase	PCMT1	>tr|A0A0A0MRJ6|A0A0A0MRJ6_HUMAN Protein-L-isoaspartate O-methyltransferase OS=Homo sapiens GN=PCMT1 PE=1 SV=1;>tr|H7BY58|H7BY58_HUMAN Protein-L-isoaspartate O-methyltransferase OS=Homo sapiens GN=PCMT1 PE=1 SV=1;>sp|P22061|PIMT_HUMAN Protein-L-isoaspartate	ENSG00000120265	ENSP00000356350;ENSP00000356354	H7BY58_HUMAN;PIMT_HUMAN	Not Sig	logFC < 2.0	UNCERTAIN
231	23.5132	23.3378	23.0958	23.192	23.3185	23.0847	23.7045	23.526	NA	NA	NA	NA	NA	202	0.325029	0.728879	0.123736	0.0572405	A0A0A0MRK6;Q13505;A0A0C4DFQ1	A0A0A0MRK6;Q13505;A0A0C4DFQ1	Metaxin-1	MTX1	>tr|A0A0A0MRK6|A0A0A0MRK6_HUMAN Metaxin 1, isoform CRA_b OS=Homo sapiens GN=MTX1 PE=1 SV=1;>sp|Q13505|MTX1_HUMAN Metaxin-1 OS=Homo sapiens GN=MTX1 PE=1 SV=2;>tr|A0A0C4DFQ1|A0A0C4DFQ1_HUMAN Metaxin-1 OS=Homo sapiens GN=MTX1 PE=1 SV=1	ENSG00000173171	ENSP00000317106;ENSP00000357360	MTX1_HUMAN	Not Sig	logFC < 2.0	UNCERTAIN
232	22.0589	21.9801	21.5235	21.9202	21.0321	20.6095	21.9265	21.2461	NA	NA	NA	NA	NA	203	1.17024	0.196895	-0.667122	-0.290103	J3QSX6;F8W8M4;A0A0A0MRL6;O14639;H0Y7N6;F6XFR5	J3QSX6;F8W8M4;A0A0A0MRL6;O14639;H0Y7N6;F6XFR5	Actin-binding LIM protein 1	ABLIM1	>tr|J3QSX6|J3QSX6_HUMAN Actin-binding LIM protein 1 OS=Homo sapiens GN=ABLIM1 PE=1 SV=2;>tr|F8W8M4|F8W8M4_HUMAN Actin-binding LIM protein 1 OS=Homo sapiens GN=ABLIM1 PE=1 SV=1;>tr|A0A0A0MRL6|A0A0A0MRL6_HUMAN Actin-binding LIM protein 1 OS=Homo sapiens GN=A	ENSG00000099204	ENSP00000338190;ENSP00000358256;ENSP00000358261;ENSP00000358270;ENSP00000376679;ENSP00000400934;ENSP00000414154;ENSP00000433629	ABLM1_HUMAN;F6XFR5_HUMAN;F8W8M4_HUMAN;H0Y7N6_HUMAN;J3QSX6_HUMAN	Not Sig	logFC < 2.0	UNCERTAIN
233	22.3073	22.5735	22.2944	22.6264	20.639	22.3008	22.0246	22.3026	NA	NA	NA	NA	NA	204	0.767409	0.225025	-0.633679	-0.263222	A0A0A0MRL7;P55210;Q5SVL2	A0A0A0MRL7;P55210;Q5SVL2	Caspase-7;Caspase-7 subunit p20;Caspase-7 subunit p11	CASP7	>tr|A0A0A0MRL7|A0A0A0MRL7_HUMAN Caspase-7 OS=Homo sapiens GN=CASP7 PE=1 SV=1;>sp|P55210|CASP7_HUMAN Caspase-7 OS=Homo sapiens GN=CASP7 PE=1 SV=1;>tr|Q5SVL2|Q5SVL2_HUMAN Caspase-7 (Fragment) OS=Homo sapiens GN=CASP7 PE=1 SV=1	ENSG00000165806	ENSP00000298701;ENSP00000358321;ENSP00000358324;ENSP00000358327;ENSP00000358337;ENSP00000398107;ENSP00000400094	CASP7_HUMAN;Q5SVL2_HUMAN	Not Sig	logFC < 2.0	UNCERTAIN
234	25.0604	25.5165	25.337	25.1712	24.8663	24.871	24.7434	24.3865	NA	NA	NA	NA	NA	205	1.97726	0.229305	-0.554468	-0.25773	A0A0A0MRM9;Q14978;S4R402;S4R349	A0A0A0MRM9;Q14978	Nucleolar and coiled-body phosphoprotein 1	NOLC1	>tr|A0A0A0MRM9|A0A0A0MRM9_HUMAN Nucleolar and coiled-body phosphoprotein 1 (Fragment) OS=Homo sapiens GN=NOLC1 PE=1 SV=1;>sp|Q14978|NOLC1_HUMAN Nucleolar and coiled-body phosphoprotein 1 OS=Homo sapiens GN=NOLC1 PE=1 SV=2	ENSG00000166197	ENSP00000359024;ENSP00000385410	NOLC1_HUMAN	Not Sig	logFC < 2.0	UNCERTAIN
235	20.2922	22.2691	21.7778	22.17	22.091	22.5032	22.5029	22.509	NA	NA	NA	NA	NA	206	0.824159	0.171899	0.774229	0.313572	A0A0A0MRN5;Q9NZT2;A0A087X028	A0A0A0MRN5;Q9NZT2	Opioid growth factor receptor	OGFR	>tr|A0A0A0MRN5|A0A0A0MRN5_HUMAN Opioid growth factor receptor OS=Homo sapiens GN=OGFR PE=1 SV=1;>sp|Q9NZT2|OGFR_HUMAN Opioid growth factor receptor OS=Homo sapiens GN=OGFR PE=1 SV=3	ENSG00000060491	ENSP00000290291;ENSP00000359491	OGFR_HUMAN	Not Sig	logFC < 2.0	UNCERTAIN
236	24.2985	24.6159	25.0006	24.5079	24.6935	24.5201	24.4289	24.3571	NA	NA	NA	NA	NA	208	0.26527	0.765754	-0.105839	-0.0489056	A0A0A0MRP6;B7ZLQ5;P28370	A0A0A0MRP6;B7ZLQ5;P28370	Probable global transcription activator SNF2L1	SMARCA1	>tr|A0A0A0MRP6|A0A0A0MRP6_HUMAN Probable global transcription activator SNF2L1 OS=Homo sapiens GN=SMARCA1 PE=1 SV=1;>tr|B7ZLQ5|B7ZLQ5_HUMAN Probable global transcription activator SNF2L1 OS=Homo sapiens GN=SMARCA1 PE=1 SV=1;>sp|P28370|SMCA1_HUMAN Probable	ENSG00000102038	ENSP00000360162;ENSP00000360163;ENSP00000360164	B7ZLQ5_HUMAN;SMCA1_HUMAN	Not Sig	logFC < 2.0	UNCERTAIN
237	26.1278	25.979	25.6825	26.1307	26.2498	26.1364	26.0811	26.4962	NA	NA	NA	NA	NA	210	0.953002	0.488806	0.260889	0.121918	A0A0A0MRR7;P09234;Q5TAL2	A0A0A0MRR7;P09234	U1 small nuclear ribonucleoprotein C	SNRPC	>tr|A0A0A0MRR7|A0A0A0MRR7_HUMAN U1 small nuclear ribonucleoprotein C OS=Homo sapiens GN=SNRPC PE=1 SV=1;>sp|P09234|RU1C_HUMAN U1 small nuclear ribonucleoprotein C OS=Homo sapiens GN=SNRPC PE=1 SV=1	ENSG00000124562	ENSP00000244520;ENSP00000363129	RU1C_HUMAN	Not Sig	logFC < 2.0	UNCERTAIN
238	22.3376	22.4288	22.1273	22.377	22.3464	22.7767	22.5988	22.7283	NA	NA	NA	NA	NA	212	1.34595	0.441887	0.294879	0.1393	B6VEX4;A0A0A0MRT6;Q8IZP0	B6VEX4;A0A0A0MRT6;Q8IZP0	Abl interactor 1	ABI1	>tr|B6VEX4|B6VEX4_HUMAN Abl interactor 1 OS=Homo sapiens GN=ABI1 PE=1 SV=1;>tr|A0A0A0MRT6|A0A0A0MRT6_HUMAN Abl interactor 1 OS=Homo sapiens GN=ABI1 PE=1 SV=1;>sp|Q8IZP0|ABI1_HUMAN Abl interactor 1 OS=Homo sapiens GN=ABI1 PE=1 SV=4	ENSG00000136754	ENSP00000279599;ENSP00000352114;ENSP00000365308;ENSP00000365309;ENSP00000365310;ENSP00000365312;ENSP00000365330;ENSP00000365336;ENSP00000365340;ENSP00000440101	ABI1_HUMAN;B6VEX4_HUMAN	Not Sig	logFC < 2.0	UNCERTAIN
239	26.6432	26.8622	27.3327	26.661	26.4425	26.0268	25.9342	25.5945	NA	NA	NA	NA	NA	214	1.99195	0.101203	-0.875272	-0.391255	A0A0A0MRV0;Q9P2E9;A0A087WVV2;F8W7S5;A0A087WU26;A2A2S5;V9GY78;H0YDJ4;H9KV85	A0A0A0MRV0;Q9P2E9;A0A087WVV2;F8W7S5	Ribosome-binding protein 1	RRBP1	>tr|A0A0A0MRV0|A0A0A0MRV0_HUMAN Ribosome-binding protein 1 OS=Homo sapiens GN=RRBP1 PE=1 SV=1;>sp|Q9P2E9|RRBP1_HUMAN Ribosome-binding protein 1 OS=Homo sapiens GN=RRBP1 PE=1 SV=4;>tr|A0A087WVV2|A0A087WVV2_HUMAN Ribosome-binding protein 1 OS=Homo sapiens GN	ENSG00000125844	ENSP00000246043;ENSP00000354045;ENSP00000367038;ENSP00000367044;ENSP00000401206	F8W7S5_HUMAN;RRBP1_HUMAN	Not Sig	logFC < 2.0	UNCERTAIN
240	21.2879	21.4144	21.5108	21.3204	21.6206	22.1187	21.9569	21.2908	NA	NA	NA	NA	NA	215	0.977101	0.386558	0.3634	0.16588	F8W6G5;A0A0A0MRW7;Q7Z2E3;C9JZ40	F8W6G5;A0A0A0MRW7;Q7Z2E3;C9JZ40	Aprataxin	APTX	>tr|F8W6G5|F8W6G5_HUMAN Aprataxin (Fragment) OS=Homo sapiens GN=APTX PE=1 SV=1;>tr|A0A0A0MRW7|A0A0A0MRW7_HUMAN Aprataxin OS=Homo sapiens GN=APTX PE=1 SV=1;>sp|Q7Z2E3|APTX_HUMAN Aprataxin OS=Homo sapiens GN=APTX PE=1 SV=2;>tr|C9JZ40|C9JZ40_HUMAN Aprataxin (	ENSG00000137074	ENSP00000311547;ENSP00000369140;ENSP00000369141;ENSP00000369145;ENSP00000369147;ENSP00000369153;ENSP00000380357;ENSP00000400806;ENSP00000417634;ENSP00000417804;ENSP00000418144;ENSP00000418311;ENSP00000418733;ENSP00000419020;ENSP00000419042;ENSP00000419289;ENSP00000419623;ENSP00000419846;ENSP00000420071;ENSP00000420263	APTX_HUMAN;C9JZ40_HUMAN;F8W6G5_HUMAN	Not Sig	logFC < 2.0	UNCERTAIN
241	21.4474	21.6479	21.3418	22.1502	21.5415	21.2037	20.8375	20.5564	NA	NA	NA	NA	NA	216	1.14694	0.220232	-0.612065	-0.268477	A0A0A0MRX1;Q12926;B1AM48;C9JB16;B1APY9;B1APY8;A0A0R4J2E6;P26378	A0A0A0MRX1;Q12926;B1AM48;C9JB16;B1APY9;B1APY8;A0A0R4J2E6;P26378	ELAV-like protein 2;ELAV-like protein 4	ELAVL2;ELAVL4	>tr|A0A0A0MRX1|A0A0A0MRX1_HUMAN ELAV-like protein OS=Homo sapiens GN=ELAVL2 PE=1 SV=1;>sp|Q12926|ELAV2_HUMAN ELAV-like protein 2 OS=Homo sapiens GN=ELAVL2 PE=1 SV=2;>tr|B1AM48|B1AM48_HUMAN ELAV-like protein (Fragment) OS=Homo sapiens GN=ELAVL2 PE=1 SV=1;>t	ENSG00000107105;ENSG00000162374	ENSP00000223951;ENSP00000349594;ENSP00000360884;ENSP00000360886;ENSP00000360888;ENSP00000360889;ENSP00000360892;ENSP00000369453;ENSP00000369460;ENSP00000380479;ENSP00000391757;ENSP00000399939;ENSP00000412602;ENSP00000440998	B1AM48_HUMAN;B1APY8_HUMAN;B1APY9_HUMAN;C9JB16_HUMAN;ELAV2_HUMAN;ELAV4_HUMAN	Not Sig	logFC < 2.0	UNCERTAIN
242	28.7112	28.4617	28.604	28.6084	29.1823	28.8281	28.9744	29.0134	NA	NA	NA	NA	NA	219	2.40059	0.327233	0.403252	0.193034	A0A0A0MS51;A0A0A0MT01;P06396;CON__Q3SX14	A0A0A0MS51;A0A0A0MT01;P06396	Gelsolin	GSN	>tr|A0A0A0MS51|A0A0A0MS51_HUMAN Gelsolin OS=Homo sapiens GN=GSN PE=1 SV=1;>tr|A0A0A0MT01|A0A0A0MT01_HUMAN Gelsolin OS=Homo sapiens GN=GSN PE=1 SV=1;>sp|P06396|GELS_HUMAN Gelsolin OS=Homo sapiens GN=GSN PE=1 SV=1	ENSG00000148180	ENSP00000340888;ENSP00000362914;ENSP00000362924;ENSP00000362929;ENSP00000377882;ENSP00000409358;ENSP00000411293;ENSP00000416586	GELS_HUMAN	Not Sig	logFC < 2.0	UNCERTAIN
243	24.2918	24.4947	24.186	24.609	24.5237	24.5259	24.641	24.5629	NA	NA	NA	NA	NA	224	0.845629	0.635251	0.167982	0.0800062	A0A0A0MSB8;Q9UPT5;A0A0A0MRE1;B4DJ07;B5MCY9;K7ERQ5;C9JME6;C9JKC2	A0A0A0MSB8;Q9UPT5;A0A0A0MRE1;B4DJ07	Exocyst complex component 7	EXOC7	>tr|A0A0A0MSB8|A0A0A0MSB8_HUMAN Exocyst complex component 7 OS=Homo sapiens GN=EXOC7 PE=1 SV=1;>sp|Q9UPT5|EXOC7_HUMAN Exocyst complex component 7 OS=Homo sapiens GN=EXOC7 PE=1 SV=3;>tr|A0A0A0MRE1|A0A0A0MRE1_HUMAN Exocyst complex component 7 (Fragment) OS=H	ENSG00000182473	ENSP00000333806;ENSP00000334100;ENSP00000384368;ENSP00000404322;ENSP00000466682;ENSP00000468404	B4DJ07_HUMAN;EXOC7_HUMAN	Not Sig	logFC < 2.0	UNCERTAIN
244	28.1559	28.1946	27.7287	28.1792	28.4508	28.3308	28.3043	28.5144	NA	NA	NA	NA	NA	226	1.46785	0.397535	0.335473	0.158037	A0A0A0MSE2;Q16836;E9PF18	A0A0A0MSE2;Q16836;E9PF18	Hydroxyacyl-coenzyme A dehydrogenase, mitochondrial	HADH	>tr|A0A0A0MSE2|A0A0A0MSE2_HUMAN Hydroxyacyl-coenzyme A dehydrogenase, mitochondrial OS=Homo sapiens GN=HADH PE=1 SV=1;>sp|Q16836|HCDH_HUMAN Hydroxyacyl-coenzyme A dehydrogenase, mitochondrial OS=Homo sapiens GN=HADH PE=1 SV=3;>tr|E9PF18|E9PF18_HUMAN Hydrox	ENSG00000138796	ENSP00000312288;ENSP00000395167;ENSP00000425952	E9PF18_HUMAN;HCDH_HUMAN	Not Sig	logFC < 2.0	UNCERTAIN
245	23.1045	22.925	22.5937	23.1784	21.719	20.5181	22.9561	21.9659	NA	NA	NA	NA	NA	231	1.17916	0.0583239	-1.16063	-0.460978	B3KPJ4;A0A0A0MSI2;Q8IXK0;H7C528;Q8NDX5	B3KPJ4;A0A0A0MSI2;Q8IXK0	Polyhomeotic-like protein 2	PHC2	>tr|B3KPJ4|B3KPJ4_HUMAN Polyhomeotic-like protein 2 OS=Homo sapiens GN=PHC2 PE=1 SV=1;>tr|A0A0A0MSI2|A0A0A0MSI2_HUMAN Polyhomeotic-like protein 2 OS=Homo sapiens GN=PHC2 PE=1 SV=1;>sp|Q8IXK0|PHC2_HUMAN Polyhomeotic-like protein 2 OS=Homo sapiens GN=PHC2 PE	ENSG00000134686	ENSP00000257118;ENSP00000362517;ENSP00000362521;ENSP00000389436;ENSP00000391440	B3KPJ4_HUMAN;PHC2_HUMAN	Not Sig	logFC < 2.0	UNCERTAIN
246	19.7868	20.3437	22.643	22.0638	22.7592	22.3719	22.4822	22.7454	NA	NA	NA	NA	NA	232	1.03904	0.0432807	1.38033	0.51363	A0A0A0MSI8;O00471;F8W9B8	A0A0A0MSI8;O00471;F8W9B8	Exocyst complex component 5	EXOC5	>tr|A0A0A0MSI8|A0A0A0MSI8_HUMAN Exocyst complex component 5 OS=Homo sapiens GN=EXOC5 PE=1 SV=1;>sp|O00471|EXOC5_HUMAN Exocyst complex component 5 OS=Homo sapiens GN=EXOC5 PE=1 SV=1;>tr|F8W9B8|F8W9B8_HUMAN Exocyst complex component 5 OS=Homo sapiens GN=EXOC	ENSG00000070367	ENSP00000342100;ENSP00000389934	EXOC5_HUMAN;F8W9B8_HUMAN	Not Sig	logFC < 2.0	UNCERTAIN
247	22.7977	22.9796	23.3761	23.0865	23.8195	22.9683	22.8679	22.0644	NA	NA	NA	NA	NA	233	0.128846	0.739496	-0.129925	-0.0546187	A0A0A0MSK6;Q13017;G3V360	A0A0A0MSK6;Q13017	Rho GTPase-activating protein 5	ARHGAP5	>tr|A0A0A0MSK6|A0A0A0MSK6_HUMAN Rho GTPase-activating protein 5 OS=Homo sapiens GN=ARHGAP5 PE=1 SV=1;>sp|Q13017|RHG05_HUMAN Rho GTPase-activating protein 5 OS=Homo sapiens GN=ARHGAP5 PE=1 SV=2	ENSG00000100852	ENSP00000371897;ENSP00000379827;ENSP00000393307;ENSP00000407395;ENSP00000441692;ENSP00000452222	RHG05_HUMAN	Not Sig	logFC < 2.0	UNCERTAIN
248	22.3729	22.2643	20.5815	22.5554	21.5225	22.1839	22.2499	22.4157	NA	NA	NA	NA	NA	234	0.111108	0.715097	0.1495	0.0598415	A0A0A0MSU2;Q6PJG2;H7C1L3;C9JYU7	A0A0A0MSU2;Q6PJG2;H7C1L3	ELM2 and SANT domain-containing protein 1	ELMSAN1	>tr|A0A0A0MSU2|A0A0A0MSU2_HUMAN ELM2 and SANT domain-containing protein 1 (Fragment) OS=Homo sapiens GN=ELMSAN1 PE=1 SV=5;>sp|Q6PJG2|EMSA1_HUMAN ELM2 and SANT domain-containing protein 1 OS=Homo sapiens GN=ELMSAN1 PE=1 SV=2;>tr|H7C1L3|H7C1L3_HUMAN ELM2 and	ENSG00000156030	ENSP00000286523;ENSP00000377634;ENSP00000400871;ENSP00000407767	EMSA1_HUMAN;H7C1L3_HUMAN	Not Sig	logFC < 2.0	UNCERTAIN
249	26.6593	26.6326	26.3313	26.5734	26.4562	26.4406	26.7491	26.5219	NA	NA	NA	NA	NA	235	0.023879	0.988497	-0.00722742	-0.00343621	A0A0A0MSW4;P48739;B3KYB6;B3KYB7	A0A0A0MSW4;P48739	Phosphatidylinositol transfer protein beta isoform	PITPNB	>tr|A0A0A0MSW4|A0A0A0MSW4_HUMAN Phosphatidylinositol transfer protein beta isoform OS=Homo sapiens GN=PITPNB PE=1 SV=1;>sp|P48739|PIPNB_HUMAN Phosphatidylinositol transfer protein beta isoform OS=Homo sapiens GN=PITPNB PE=1 SV=2	ENSG00000180957	ENSP00000321266;ENSP00000334738	PIPNB_HUMAN	Not Sig	logFC < 2.0	UNCERTAIN
250	21.5792	21.7366	21.5784	21.5183	21.7755	21.8776	21.7823	21.8708	NA	NA	NA	NA	NA	236	2.20587	0.530532	0.22342	0.10876	A0A0A0MSZ1;A0A0A0MT23;J3KNR0;P27448;A0A0A0MST9;A0A0A0MQR8;H0YIY6;H0YKP9	A0A0A0MSZ1;A0A0A0MT23;J3KNR0;P27448;A0A0A0MST9;A0A0A0MQR8;H0YIY6	MAP/microtubule affinity-regulating kinase 3	MARK3	>tr|A0A0A0MSZ1|A0A0A0MSZ1_HUMAN MAP/microtubule affinity-regulating kinase 3 OS=Homo sapiens GN=MARK3 PE=1 SV=1;>tr|A0A0A0MT23|A0A0A0MT23_HUMAN MAP/microtubule affinity-regulating kinase 3 OS=Homo sapiens GN=MARK3 PE=1 SV=1;>tr|J3KNR0|J3KNR0_HUMAN MAP/micr	ENSG00000075413	ENSP00000216288;ENSP00000303698;ENSP00000335347;ENSP00000402104;ENSP00000408092;ENSP00000411397;ENSP00000450460;ENSP00000450772	H0YIY6_HUMAN;J3KNR0_HUMAN;MARK3_HUMAN	Not Sig	logFC < 2.0	UNCERTAIN
251	23.0216	23.2771	22.998	22.9334	21.2273	23.0898	23.29	23.9354	NA	NA	NA	NA	NA	237	0.108332	0.687854	-0.171933	-0.0664764	A0A0C4DFN8;A0A0C4DGN7;A0A0A0MSZ4;A0A0A0MT64;P22570;A0A0A0MTN9;J3QQX3;A0A0A0MTR6;J3KS64;J3QKZ8;J3QQW7	A0A0C4DFN8;A0A0C4DGN7;A0A0A0MSZ4;A0A0A0MT64;P22570;A0A0A0MTN9;J3QQX3;A0A0A0MTR6	NADPH:adrenodoxin oxidoreductase, mitochondrial	FDXR	>tr|A0A0C4DFN8|A0A0C4DFN8_HUMAN NADPH:adrenodoxin oxidoreductase, mitochondrial OS=Homo sapiens GN=FDXR PE=1 SV=1;>tr|A0A0C4DGN7|A0A0C4DGN7_HUMAN NADPH:adrenodoxin oxidoreductase, mitochondrial OS=Homo sapiens GN=FDXR PE=1 SV=1;>tr|A0A0A0MSZ4|A0A0A0MSZ4_HU	ENSG00000161513	ENSP00000293195;ENSP00000416515;ENSP00000462972;ENSP00000463940	ADRO_HUMAN;J3QQX3_HUMAN	Not Sig	logFC < 2.0	UNCERTAIN
252	23.504	23.374	23.6532	23.7884	24.1628	23.7319	23.9376	23.4762	NA	NA	NA	NA	NA	241	0.698726	0.513208	0.247244	0.113844	A0A0A0MT33;Q9UPN6	A0A0A0MT33;Q9UPN6	Protein SCAF8	SCAF8	>tr|A0A0A0MT33|A0A0A0MT33_HUMAN Protein SCAF8 OS=Homo sapiens GN=SCAF8 PE=1 SV=1;>sp|Q9UPN6|SCAF8_HUMAN Protein SCAF8 OS=Homo sapiens GN=SCAF8 PE=1 SV=1	ENSG00000213079	ENSP00000356146;ENSP00000413098	SCAF8_HUMAN	Not Sig	logFC < 2.0	UNCERTAIN
253	23.2791	23.1451	23.5283	23.2881	23.1587	23.3027	23.409	23.0549	NA	NA	NA	NA	NA	244	0.295563	0.822841	-0.078826	-0.0373306	A0A0A0MT60;Q5T1M5;X6RKW4	A0A0A0MT60;Q5T1M5	FK506-binding protein 15	FKBP15	>tr|A0A0A0MT60|A0A0A0MT60_HUMAN Peptidyl-prolyl cis-trans isomerase (Fragment) OS=Homo sapiens GN=FKBP15 PE=1 SV=1;>sp|Q5T1M5|FKB15_HUMAN FK506-binding protein 15 OS=Homo sapiens GN=FKBP15 PE=1 SV=2	ENSG00000119321	ENSP00000238256;ENSP00000415733;ENSP00000416158	FKB15_HUMAN	Not Sig	logFC < 2.0	UNCERTAIN
254	23.2918	23.1376	23.396	23.7165	22.9532	22.9967	22.9948	23.5589	NA	NA	NA	NA	NA	246	0.657747	0.501314	-0.259559	-0.118545	A0A0A0MT83;P26440;H7C4G6;H0YKV0;H0YLC3;H0YN10;A0A087WVD3	A0A0A0MT83;P26440;H7C4G6;H0YKV0;H0YLC3	Isovaleryl-CoA dehydrogenase, mitochondrial	IVD	>tr|A0A0A0MT83|A0A0A0MT83_HUMAN Isovaleryl-CoA dehydrogenase, mitochondrial OS=Homo sapiens GN=IVD PE=1 SV=1;>sp|P26440|IVD_HUMAN Isovaleryl-CoA dehydrogenase, mitochondrial OS=Homo sapiens GN=IVD PE=1 SV=1;>tr|H7C4G6|H7C4G6_HUMAN Isovaleryl-CoA dehydrogen	ENSG00000128928	ENSP00000249760;ENSP00000417256;ENSP00000417990;ENSP00000452949;ENSP00000453146	H0YKV0_HUMAN;H0YLC3_HUMAN;H7C4G6_HUMAN;IVD_HUMAN	Not Sig	logFC < 2.0	UNCERTAIN
255	21.9288	21.9649	21.8503	21.1339	22.4466	21.8616	22.0093	21.7647	NA	NA	NA	NA	NA	247	0.568857	0.458285	0.301088	0.133952	A0A0A0MTB8;Q8NI36	A0A0A0MTB8;Q8NI36	WD repeat-containing protein 36	WDR36	>tr|A0A0A0MTB8|A0A0A0MTB8_HUMAN WD repeat-containing protein 36 OS=Homo sapiens GN=WDR36 PE=1 SV=1;>sp|Q8NI36|WDR36_HUMAN WD repeat-containing protein 36 OS=Homo sapiens GN=WDR36 PE=1 SV=1	ENSG00000134987	ENSP00000423067;ENSP00000424628	WDR36_HUMAN	Not Sig	logFC < 2.0	UNCERTAIN
256	22.3026	22.242	21.9164	20.4371	22.3206	21.9193	20.8161	20.8711	NA	NA	NA	NA	NA	249	0.16174	0.580864	-0.242741	-0.0941636	D6RDV0;D6RA37;A0A0A0MTC2;D6RIY7;Q13454	D6RDV0;D6RA37;A0A0A0MTC2;D6RIY7;Q13454	Tumor suppressor candidate 3	TUSC3	>tr|D6RDV0|D6RDV0_HUMAN Tumor suppressor candidate 3 OS=Homo sapiens GN=TUSC3 PE=1 SV=1;>tr|D6RA37|D6RA37_HUMAN Tumor suppressor candidate 3 OS=Homo sapiens GN=TUSC3 PE=1 SV=1;>tr|A0A0A0MTC2|A0A0A0MTC2_HUMAN Tumor suppressor candidate 3 (Fragment) OS=Homo	ENSG00000104723	ENSP00000221167;ENSP00000371450;ENSP00000420829;ENSP00000423426;ENSP00000424544;ENSP00000425777;ENSP00000426880;ENSP00000426973	D6RA37_HUMAN;D6RDV0_HUMAN;D6RIY7_HUMAN;TUSC3_HUMAN	Not Sig	logFC < 2.0	UNCERTAIN
257	24.2521	23.9878	23.9606	24.2922	24.1629	24.2645	24.1774	24.7576	NA	NA	NA	NA	NA	250	0.626313	0.558251	0.217405	0.100405	A0A0A0MTC4;A0A0A0MTC6;E9PH62;A0A0A0MTC5;Q9NUL3;A0A0A0MTD1;F8VPI7;E7EPX0;E7EVJ4;E5RJN7;G5EA18;E7EVI1;E5RJ67;H0YBY0;E5RFK1	A0A0A0MTC4;A0A0A0MTC6;E9PH62;A0A0A0MTC5;Q9NUL3;A0A0A0MTD1;F8VPI7;E7EPX0;E7EVJ4;E5RJN7;G5EA18;E7EVI1	Double-stranded RNA-binding protein Staufen homolog 2	STAU2	>tr|A0A0A0MTC4|A0A0A0MTC4_HUMAN Double-stranded RNA-binding protein Staufen homolog 2 OS=Homo sapiens GN=STAU2 PE=1 SV=1;>tr|A0A0A0MTC6|A0A0A0MTC6_HUMAN Double-stranded RNA-binding protein Staufen homolog 2 OS=Homo sapiens GN=STAU2 PE=1 SV=1;>tr|E9PH62|E9P	ENSG00000040341	ENSP00000348026;ENSP00000427977;ENSP00000428456;ENSP00000428476;ENSP00000428664;ENSP00000429005;ENSP00000429973;ENSP00000430611;ENSP00000430907	E5RJN7_HUMAN;E7EPX0_HUMAN;E7EVI1_HUMAN;E7EVJ4_HUMAN;E9PH62_HUMAN;F8VPI7_HUMAN;G5EA18_HUMAN;STAU2_HUMAN	Not Sig	logFC < 2.0	UNCERTAIN
258	24.7847	24.7462	24.8466	24.9544	25.6974	25.4776	25.318	25.5111	NA	NA	NA	NA	NA	252	3.5085	0.167631	0.668084	0.319636	A0A0A0MTH3;Q13418;A0A087WWY6	A0A0A0MTH3;Q13418	Integrin-linked protein kinase	ILK	>tr|A0A0A0MTH3|A0A0A0MTH3_HUMAN Integrin-linked protein kinase OS=Homo sapiens GN=ILK PE=1 SV=1;>sp|Q13418|ILK_HUMAN Integrin-linked protein kinase OS=Homo sapiens GN=ILK PE=1 SV=2	ENSG00000166333	ENSP00000299421;ENSP00000379975;ENSP00000403487	ILK_HUMAN	Not Sig	logFC < 2.0	UNCERTAIN
259	23.7547	23.8357	24.2539	23.6316	24.1534	24.0335	23.583	23.8645	NA	NA	NA	NA	NA	253	0.0779162	0.919854	0.039638	0.018157	A0A0A0MTH9;O14981	A0A0A0MTH9;O14981	TATA-binding protein-associated factor 172	BTAF1	>tr|A0A0A0MTH9|A0A0A0MTH9_HUMAN TATA-binding protein-associated factor 172 OS=Homo sapiens GN=BTAF1 PE=1 SV=1;>sp|O14981|BTAF1_HUMAN TATA-binding protein-associated factor 172 OS=Homo sapiens GN=BTAF1 PE=1 SV=2	ENSG00000095564	ENSP00000265990	BTAF1_HUMAN	Not Sig	logFC < 2.0	UNCERTAIN
260	22.218	22.4395	21.9848	22.315	21.5694	22.3813	22.3749	22.2026	NA	NA	NA	NA	NA	254	0.197068	0.769295	-0.107288	-0.0484415	A0A0A0MTL5;Q13309;D6RAG5	A0A0A0MTL5;Q13309;D6RAG5	S-phase kinase-associated protein 2	SKP2	>tr|A0A0A0MTL5|A0A0A0MTL5_HUMAN S-phase kinase-associated protein 2 OS=Homo sapiens GN=SKP2 PE=1 SV=1;>sp|Q13309|SKP2_HUMAN S-phase kinase-associated protein 2 OS=Homo sapiens GN=SKP2 PE=1 SV=2;>tr|D6RAG5|D6RAG5_HUMAN S-phase kinase-associated protein 2 OS	ENSG00000145604	ENSP00000274254;ENSP00000274255;ENSP00000421941;ENSP00000443492	D6RAG5_HUMAN;SKP2_HUMAN	Not Sig	logFC < 2.0	UNCERTAIN
261	24.733	24.6549	24.8723	24.6478	25.1281	24.9929	24.9306	24.8251	NA	NA	NA	NA	NA	256	1.59341	0.50676	0.242144	0.116304	Q5T2B5;A0A0A0MTN0;Q13617;Q5T2B7	Q5T2B5;A0A0A0MTN0;Q13617	Cullin-2	CUL2	>tr|Q5T2B5|Q5T2B5_HUMAN Cullin-2 OS=Homo sapiens GN=CUL2 PE=1 SV=1;>tr|A0A0A0MTN0|A0A0A0MTN0_HUMAN Cullin-2 OS=Homo sapiens GN=CUL2 PE=1 SV=1;>sp|Q13617|CUL2_HUMAN Cullin-2 OS=Homo sapiens GN=CUL2 PE=1 SV=2	ENSG00000108094	ENSP00000363874;ENSP00000363878;ENSP00000363880;ENSP00000363881;ENSP00000363883;ENSP00000444856	CUL2_HUMAN;Q5T2B5_HUMAN	Not Sig	logFC < 2.0	UNCERTAIN
262	23.1483	23.0464	23.1473	23.0155	23.9631	23.4476	23.9527	23.5961	NA	NA	NA	NA	NA	257	2.54728	0.180355	0.650506	0.304833	A0A0A0MTP6;O15357;F5GY16;F5H588;H0YFZ4	A0A0A0MTP6;O15357	Phosphatidylinositol 3,4,5-trisphosphate 5-phosphatase 2	INPPL1	>tr|A0A0A0MTP6|A0A0A0MTP6_HUMAN Phosphatidylinositol 3,4,5-trisphosphate 5-phosphatase 2 OS=Homo sapiens GN=INPPL1 PE=1 SV=1;>sp|O15357|SHIP2_HUMAN Phosphatidylinositol 3,4,5-trisphosphate 5-phosphatase 2 OS=Homo sapiens GN=INPPL1 PE=1 SV=2	ENSG00000165458	ENSP00000298229;ENSP00000444619;ENSP00000446360	SHIP2_HUMAN	Not Sig	logFC < 2.0	UNCERTAIN
263	28.591	28.6959	28.5645	28.4991	28.7377	28.4592	28.4023	28.4667	NA	NA	NA	NA	NA	258	0.359197	0.836064	-0.0711799	-0.0341298	A0A0A0MTS2;P06744;K7EQ48;A0A0J9YXP8;A0A0J9YYH3;A0A0J9YX90;K7ENA0;K7EPY4;K7ELR7;K7EP41;K7ERC6;CON__Q3ZBD7;K7ERK8;K7ESF4;K7EIL4	A0A0A0MTS2;P06744;K7EQ48;A0A0J9YXP8;A0A0J9YYH3	Glucose-6-phosphate isomerase	GPI	>tr|A0A0A0MTS2|A0A0A0MTS2_HUMAN Glucose-6-phosphate isomerase (Fragment) OS=Homo sapiens GN=GPI PE=1 SV=1;>sp|P06744|G6PI_HUMAN Glucose-6-phosphate isomerase OS=Homo sapiens GN=GPI PE=1 SV=4;>tr|K7EQ48|K7EQ48_HUMAN Glucose-6-phosphate isomerase OS=Homo sap	ENSG00000105220	ENSP00000348877;ENSP00000405573;ENSP00000464798;ENSP00000465858;ENSP00000466851;ENSP00000467590;ENSP00000467670	G6PI_HUMAN;K7EQ48_HUMAN	Not Sig	logFC < 2.0	UNCERTAIN
264	23.3966	23.3793	22.8691	23.2624	21.6061	23.1055	22.5622	22.9913	NA	NA	NA	NA	NA	259	0.928088	0.203445	-0.660623	-0.27966	A0A0A6YYA0;Q9Y3B3;G3V2Y2	A0A0A6YYA0;Q9Y3B3	Transmembrane emp24 domain-containing protein 7	TMED7	>tr|A0A0A6YYA0|A0A0A6YYA0_HUMAN Protein TMED7-TICAM2 OS=Homo sapiens GN=TMED7-TICAM2 PE=3 SV=1;>sp|Q9Y3B3|TMED7_HUMAN Transmembrane emp24 domain-containing protein 7 OS=Homo sapiens GN=TMED7 PE=1 SV=2	ENSG00000134970	ENSP00000405926	TMED7_HUMAN	Not Sig	logFC < 2.0	UNCERTAIN
265	20.7689	20.9264	20.9281	20.8332	21.2109	20.9139	20.4119	20.8497	NA	NA	NA	NA	NA	260	0.035847	0.973987	-0.0175667	-0.00809759	A0A0A6YYB7;E9PCH4;Q8TEU7;D6RE77;B7Z7Y1	A0A0A6YYB7;E9PCH4;Q8TEU7;D6RE77;B7Z7Y1	Rap guanine nucleotide exchange factor 6	RAPGEF6	>tr|A0A0A6YYB7|A0A0A6YYB7_HUMAN Rap guanine nucleotide exchange factor 6 OS=Homo sapiens GN=RAPGEF6 PE=1 SV=1;>tr|E9PCH4|E9PCH4_HUMAN Uncharacterized protein OS=Homo sapiens PE=4 SV=1;>sp|Q8TEU7|RPGF6_HUMAN Rap guanine nucleotide exchange factor 6 OS=Homo	ENSG00000158987;ENSG00000217128	ENSP00000296859;ENSP00000309298;ENSP00000311419;ENSP00000421684;ENSP00000425389;ENSP00000425772;ENSP00000426081;ENSP00000426910;ENSP00000426948	B7Z7Y1_HUMAN;D6RE77_HUMAN;E9PCH4_HUMAN;RPGF6_HUMAN	Not Sig	logFC < 2.0	UNCERTAIN
266	20.5367	20.8252	22.0876	21.8611	20.8836	20.7056	20.3909	20.5999	NA	NA	NA	NA	NA	261	0.872009	0.200683	-0.682626	-0.285083	A0A0A6YYC7;Q96JP5	A0A0A6YYC7;Q96JP5	E3 ubiquitin-protein ligase ZFP91	ZFP91	>tr|A0A0A6YYC7|A0A0A6YYC7_HUMAN HCG2042749, isoform CRA_d OS=Homo sapiens GN=ZFP91-CNTF PE=4 SV=1;>sp|Q96JP5|ZFP91_HUMAN E3 ubiquitin-protein ligase ZFP91 OS=Homo sapiens GN=ZFP91 PE=1 SV=1	ENSG00000186660	ENSP00000339030	ZFP91_HUMAN	Not Sig	logFC < 2.0	UNCERTAIN
267	21.8078	21.7691	21.4596	22.1533	21.1951	21.7043	21.5361	22.3217	NA	NA	NA	NA	NA	264	0.149928	0.775163	-0.108136	-0.0475256	A0A0A6YYH1;Q7Z6K5;H0YMP5;H0YL03;H0YMK0;H0YL85	A0A0A6YYH1;Q7Z6K5;H0YMP5;H0YL03;H0YMK0;H0YL85	Arpin	ARPIN;C15orf38-AP3S2	>tr|A0A0A6YYH1|A0A0A6YYH1_HUMAN Protein C15orf38-AP3S2 OS=Homo sapiens GN=C15orf38-AP3S2 PE=4 SV=1;>sp|Q7Z6K5|ARPIN_HUMAN Arpin OS=Homo sapiens GN=ARPIN PE=1 SV=1;>tr|H0YMP5|H0YMP5_HUMAN Arpin OS=Homo sapiens GN=ARPIN PE=1 SV=1;>tr|H0YL03|H0YL03_HUMAN Arpi	ENSG00000242498;ENSG00000250021	ENSP00000350075;ENSP00000453006;ENSP00000453100;ENSP00000453637;ENSP00000453687	CO038_HUMAN;H0YL03_HUMAN;H0YL85_HUMAN;H0YMK0_HUMAN;H0YMP5_HUMAN	Not Sig	logFC < 2.0	UNCERTAIN
268	20.3178	23.0844	23.1968	22.5935	21.1989	22.0172	21.3398	20.4433	NA	NA	NA	NA	NA	266	0.678278	0.109627	-1.04829	-0.3817	A0A0A6YYI3;A0A0B4J1V8;Q9NQ55;C9J3W3;A8MV53	A0A0A6YYI3;A0A0B4J1V8;Q9NQ55;C9J3W3;A8MV53	Suppressor of SWI4 1 homolog	PPAN	>tr|A0A0A6YYI3|A0A0A6YYI3_HUMAN Protein PPAN-P2RY11 OS=Homo sapiens GN=PPAN-P2RY11 PE=4 SV=1;>tr|A0A0B4J1V8|A0A0B4J1V8_HUMAN HCG2039996 OS=Homo sapiens GN=PPAN-P2RY11 PE=3 SV=1;>sp|Q9NQ55|SSF1_HUMAN Suppressor of SWI4 1 homolog OS=Homo sapiens GN=PPAN PE=2	ENSG00000130810;ENSG00000243207	ENSP00000253107;ENSP00000377382;ENSP00000410485;ENSP00000411918;ENSP00000450710	A8MV53_HUMAN;C9J3W3_HUMAN;SSF1_HUMAN	Not Sig	logFC < 2.0	UNCERTAIN
269	25.301	24.9273	25.0728	25.1098	26.2969	25.903	26.0123	26.0568	NA	NA	NA	NA	NA	267	3.84275	0.0604983	0.964489	0.456399	A0A0A6YYL4;P57737;I3L167;E7EP81;I3L212;I3L2Y6;I3L0X8;I3L426;I3L359;I3L1U7;I3L0X9;I3L3T0;I3L1M1;I3L442;I3NI06;I3L1G9;Q9Y3D7	A0A0A6YYL4;P57737	Coronin-7	CORO7	>tr|A0A0A6YYL4|A0A0A6YYL4_HUMAN Coronin OS=Homo sapiens GN=CORO7-PAM16 PE=3 SV=1;>sp|P57737|CORO7_HUMAN Coronin-7 OS=Homo sapiens GN=CORO7 PE=1 SV=2	ENSG00000262246	ENSP00000251166;ENSP00000461702	CORO7_HUMAN	Not Sig	logFC < 2.0	UNCERTAIN
270	22.8634	22.9742	23.2744	22.4913	23.5891	22.7918	22.5627	22.2077	NA	NA	NA	NA	NA	270	0.126658	0.769283	-0.113011	-0.0484077	A0A0B4J1W0;O75448;F5GY88;F5H5K2;B9TX62;B4DDR8;E9PFL1	A0A0B4J1W0;O75448;F5GY88;F5H5K2	Mediator of RNA polymerase II transcription subunit 24	MED24	>tr|A0A0B4J1W0|A0A0B4J1W0_HUMAN Mediator of RNA polymerase II transcription subunit 24 OS=Homo sapiens GN=MED24 PE=1 SV=1;>sp|O75448|MED24_HUMAN Mediator of RNA polymerase II transcription subunit 24 OS=Homo sapiens GN=MED24 PE=1 SV=1;>tr|F5GY88|F5GY88_HUM	ENSG00000008838	ENSP00000348610;ENSP00000377685;ENSP00000377686;ENSP00000440100;ENSP00000443344	F5GY88_HUMAN;F5H5K2_HUMAN;MED24_HUMAN	Not Sig	logFC < 2.0	UNCERTAIN
271	25.9664	26.0532	26.6712	26.1293	26.1541	26.2054	26.3066	26.1209	NA	NA	NA	NA	NA	271	0.0169728	0.988657	-0.00821543	-0.00379642	A0A0B4J1W3;Q9BXJ9;Q6N069	A0A0B4J1W3;Q9BXJ9	N-alpha-acetyltransferase 15, NatA auxiliary subunit	NAA15	>tr|A0A0B4J1W3|A0A0B4J1W3_HUMAN N-alpha-acetyltransferase 15, NatA auxiliary subunit OS=Homo sapiens GN=NAA15 PE=1 SV=1;>sp|Q9BXJ9|NAA15_HUMAN N-alpha-acetyltransferase 15, NatA auxiliary subunit OS=Homo sapiens GN=NAA15 PE=1 SV=1	ENSG00000164134	ENSP00000296543	NAA15_HUMAN	Not Sig	logFC < 2.0	UNCERTAIN
272	27.529	27.7186	27.9306	27.7125	27.4425	27.4811	27.4489	27.446	NA	NA	NA	NA	NA	272	1.75604	0.472232	-0.268082	-0.128727	A0A0B4J1Z1;C9JAB2;Q16629;F8WEA1	A0A0B4J1Z1;C9JAB2;Q16629	Serine/arginine-rich splicing factor 7	SRSF7	>tr|A0A0B4J1Z1|A0A0B4J1Z1_HUMAN Serine/arginine-rich-splicing factor 7 OS=Homo sapiens GN=SRSF7 PE=1 SV=1;>tr|C9JAB2|C9JAB2_HUMAN Serine/arginine-rich-splicing factor 7 OS=Homo sapiens GN=SRSF7 PE=1 SV=1;>sp|Q16629|SRSF7_HUMAN Serine/arginine-rich splicing	ENSG00000115875	ENSP00000325905;ENSP00000386806;ENSP00000398159;ENSP00000402264;ENSP00000402544	C9JAB2_HUMAN;SRSF7_HUMAN	Not Sig	logFC < 2.0	UNCERTAIN
273	21.1383	22.867	23.151	22.5382	20.8727	23.3964	22.7419	22.6861	NA	NA	NA	NA	NA	274	0.000311532	0.998763	0.000657558	0.000243366	F5H895;A0A0B4J239;F5GXX5;P61803	F5H895;A0A0B4J239;F5GXX5;P61803	Dolichyl-diphosphooligosaccharide--protein glycosyltransferase subunit DAD1	DAD1	>tr|F5H895|F5H895_HUMAN Dolichyl-diphosphooligosaccharide--protein glycosyltransferase subunit DAD1 OS=Homo sapiens GN=DAD1 PE=1 SV=1;>tr|A0A0B4J239|A0A0B4J239_HUMAN Dolichyl-diphosphooligosaccharide--protein glycosyltransferase subunit DAD1 OS=Homo sapien	ENSG00000129562	ENSP00000250498;ENSP00000440821;ENSP00000442074	DAD1_HUMAN;F5GXX5_HUMAN;F5H895_HUMAN	Not Sig	logFC < 2.0	UNCERTAIN
274	23.5807	23.7723	23.5384	23.7185	23.7089	24.0275	23.443	23.5649	NA	NA	NA	NA	NA	276	0.0886443	0.931538	0.0336113	0.0157227	A0A0B4J287;H3BM91;Q9H0A8;H3BPG2;H3BQF2;H3BTV9;H3BRX0	A0A0B4J287;H3BM91;Q9H0A8;H3BPG2;H3BQF2	COMM domain-containing protein 4	COMMD4	>tr|A0A0B4J287|A0A0B4J287_HUMAN COMM domain-containing protein 4 OS=Homo sapiens GN=COMMD4 PE=1 SV=1;>tr|H3BM91|H3BM91_HUMAN COMM domain-containing protein 4 (Fragment) OS=Homo sapiens GN=COMMD4 PE=1 SV=1;>sp|Q9H0A8|COMD4_HUMAN COMM domain-containing prote	ENSG00000140365	ENSP00000267935;ENSP00000340867;ENSP00000433662;ENSP00000454283;ENSP00000455303;ENSP00000455750	COMD4_HUMAN;H3BM91_HUMAN;H3BPG2_HUMAN;H3BQF2_HUMAN	Not Sig	logFC < 2.0	UNCERTAIN
275	22.5722	22.1591	22.3803	22.4349	22.9095	22.658	22.6711	22.6693	NA	NA	NA	NA	NA	278	1.74756	0.389627	0.340355	0.161663	A0A0B4J2A0;Q9UHJ6	A0A0B4J2A0;Q9UHJ6	Sedoheptulokinase	SHPK	>tr|A0A0B4J2A0|A0A0B4J2A0_HUMAN Uncharacterized protein OS=Homo sapiens PE=1 SV=1;>sp|Q9UHJ6|SHPK_HUMAN Sedoheptulokinase OS=Homo sapiens GN=SHPK PE=1 SV=3	ENSG00000197417	ENSP00000225519	SHPK_HUMAN	Not Sig	logFC < 2.0	UNCERTAIN
276	23.054	22.7142	23.0106	23.1924	23.4307	23.5754	23.6981	23.8689	NA	NA	NA	NA	NA	279	2.49971	0.180066	0.650477	0.304389	A0A0B4J2C2;Q9Y2H0;F8WF49;A0A087X246	A0A0B4J2C2;Q9Y2H0;F8WF49	Disks large-associated protein 4	DLGAP4	>tr|A0A0B4J2C2|A0A0B4J2C2_HUMAN Discs, large (Drosophila) homolog-associated protein 4, isoform CRA_b OS=Homo sapiens GN=DLGAP4 PE=1 SV=1;>sp|Q9Y2H0|DLGP4_HUMAN Disks large-associated protein 4 OS=Homo sapiens GN=DLGAP4 PE=1 SV=3;>tr|F8WF49|F8WF49_HUMAN Di	ENSG00000080845;ENSG00000269562	ENSP00000341633;ENSP00000345700;ENSP00000363014;ENSP00000363023;ENSP00000384954;ENSP00000419311;ENSP00000469167;ENSP00000469319;ENSP00000470606;ENSP00000471074;ENSP00000472269	DLGP4_HUMAN;F8WF49_HUMAN	Not Sig	logFC < 2.0	UNCERTAIN
277	28.6395	28.6116	28.1549	28.5588	27.939	28.7872	28.6578	28.7505	NA	NA	NA	NA	NA	280	0.0656402	0.914956	0.0424137	0.0190202	Q5W0H4;A0A0B4J2C3;P13693;J3KPG2;E9PJF7;H0YCX0;Q56UQ5	Q5W0H4;A0A0B4J2C3;P13693;J3KPG2;E9PJF7	Translationally-controlled tumor protein	TPT1	>tr|Q5W0H4|Q5W0H4_HUMAN Translationally-controlled tumor protein OS=Homo sapiens GN=TPT1 PE=1 SV=1;>tr|A0A0B4J2C3|A0A0B4J2C3_HUMAN Translationally-controlled tumor protein OS=Homo sapiens GN=TPT1 PE=1 SV=1;>sp|P13693|TCTP_HUMAN Translationally-controlled t	ENSG00000133112	ENSP00000339051;ENSP00000368350;ENSP00000431872;ENSP00000433738	E9PJF7_HUMAN;J3KPG2_HUMAN;Q5W0H4_HUMAN;TCTP_HUMAN	Not Sig	logFC < 2.0	UNCERTAIN
278	23.6511	23.5815	23.0983	23.8434	22.2687	23.6691	23.5124	23.9657	NA	NA	NA	NA	NA	281	0.182443	0.639076	-0.189569	-0.0787921	A0A0B4J2F8;F6S314;E2QRJ6;P52435;E7EP90;A0A0B4J1Z8;F8WF84;A6NFM0;E7EWC6;Q9H1A7;Q9GZM3;H0Y980	A0A0B4J2F8;F6S314;E2QRJ6;P52435;E7EP90;A0A0B4J1Z8;F8WF84;A6NFM0;E7EWC6;Q9H1A7;Q9GZM3	DNA-directed RNA polymerase II subunit RPB11-a;DNA-directed RNA polymerase II subunit RPB11-b2;DNA-directed RNA polymerase II subunit RPB11-b1	POLR2J3;POLR2J;POLR2J2	>tr|A0A0B4J2F8|A0A0B4J2F8_HUMAN DNA-directed RNA polymerase II subunit RPB11-b2 OS=Homo sapiens GN=POLR2J3 PE=4 SV=1;>tr|F6S314|F6S314_HUMAN DNA-directed RNA polymerase II subunit RPB11-a OS=Homo sapiens GN=POLR2J PE=4 SV=1;>tr|E2QRJ6|E2QRJ6_HUMAN DNA-dire	ENSG00000005075;ENSG00000168255;ENSG00000228049	ENSP00000292614;ENSP00000351218;ENSP00000368645;ENSP00000419082;ENSP00000419145;ENSP00000421085;ENSP00000422109;ENSP00000426619	A6NFM0_HUMAN;E2QRJ6_HUMAN;E7EP90_HUMAN;E7EWC6_HUMAN;F8WF84_HUMAN;RPB11_HUMAN;RPB1B_HUMAN;RPB1C_HUMAN	Not Sig	logFC < 2.0	UNCERTAIN
279	26.7797	26.9063	27.1639	26.7246	27.7867	27.2135	27.2017	27.0472	NA	NA	NA	NA	NA	282	1.1579	0.330378	0.418633	0.191177	A0A0C4DFL7;Q16850;H7C0D0;C9IYR8	A0A0C4DFL7;Q16850	Lanosterol 14-alpha demethylase	CYP51A1	>tr|A0A0C4DFL7|A0A0C4DFL7_HUMAN Lanosterol 14-alpha demethylase OS=Homo sapiens GN=CYP51A1 PE=1 SV=1;>sp|Q16850|CP51A_HUMAN Lanosterol 14-alpha demethylase OS=Homo sapiens GN=CYP51A1 PE=1 SV=3	ENSG00000001630	ENSP00000003100;ENSP00000406757	CP51A_HUMAN	Not Sig	logFC < 2.0	UNCERTAIN
280	20.1695	22.6353	22.5495	22.6521	23.0212	20.831	22.4907	21.3761	NA	NA	NA	NA	NA	283	0.0312522	0.876854	-0.0718317	-0.0257402	A0A0C4DFL8;F5GX28;O94953;K7EQ54	A0A0C4DFL8;F5GX28;O94953;K7EQ54	Lysine-specific demethylase 4B	KDM4B	>tr|A0A0C4DFL8|A0A0C4DFL8_HUMAN Lysine-specific demethylase 4B OS=Homo sapiens GN=KDM4B PE=1 SV=1;>tr|F5GX28|F5GX28_HUMAN Lysine-specific demethylase 4B OS=Homo sapiens GN=KDM4B PE=1 SV=2;>sp|O94953|KDM4B_HUMAN Lysine-specific demethylase 4B OS=Homo sapien	ENSG00000127663	ENSP00000159111;ENSP00000371178;ENSP00000440495;ENSP00000467678	F5GX28_HUMAN;K7EQ54_HUMAN;KDM4B_HUMAN	Not Sig	logFC < 2.0	UNCERTAIN
281	23.4348	23.117	23.0844	23.2935	24.2729	23.7352	23.3863	23.7734	NA	NA	NA	NA	NA	284	1.50606	0.232275	0.559524	0.254344	G3V267;G3V5T0;A0A0C4DFM0;G3V4T6;O43708;G3V3B9;A0A0A0MR33;H0YJN8	G3V267;G3V5T0;A0A0C4DFM0;G3V4T6;O43708;G3V3B9;A0A0A0MR33	Maleylacetoacetate isomerase	GSTZ1	>tr|G3V267|G3V267_HUMAN Maleylacetoacetate isomerase OS=Homo sapiens GN=GSTZ1 PE=1 SV=1;>tr|G3V5T0|G3V5T0_HUMAN Maleylacetoacetate isomerase OS=Homo sapiens GN=GSTZ1 PE=1 SV=1;>tr|A0A0C4DFM0|A0A0C4DFM0_HUMAN Glutathione transferase zeta 1 (Maleylacetoaceta	ENSG00000100577	ENSP00000216465;ENSP00000354959;ENSP00000377335;ENSP00000450487;ENSP00000451150;ENSP00000451927;ENSP00000451976;ENSP00000452498	G3V267_HUMAN;G3V3B9_HUMAN;G3V4T6_HUMAN;G3V5T0_HUMAN;MAAI_HUMAN	Not Sig	logFC < 2.0	UNCERTAIN
282	23.8008	23.8957	24.1352	23.4116	24.3088	23.4694	23.6164	23.4239	NA	NA	NA	NA	NA	285	0.160318	0.775932	-0.106182	-0.0470925	A0A0C4DFM1;Q92544;F8WCN2;F2Z2L1	A0A0C4DFM1;Q92544	Transmembrane 9 superfamily member 4	TM9SF4	>tr|A0A0C4DFM1|A0A0C4DFM1_HUMAN Transmembrane 9 superfamily member 4 OS=Homo sapiens GN=TM9SF4 PE=1 SV=1;>sp|Q92544|TM9S4_HUMAN Transmembrane 9 superfamily member 4 OS=Homo sapiens GN=TM9SF4 PE=1 SV=2	ENSG00000101337	ENSP00000217315;ENSP00000381104	TM9S4_HUMAN	Not Sig	logFC < 2.0	UNCERTAIN
283	24.1894	24.2025	24.2289	24.0314	24.52	24.35	24.2684	24.3341	NA	NA	NA	NA	NA	289	1.58529	0.564143	0.205027	0.099058	A0A0C4DFT3;Q12959;E7EQD7;B7Z264;E9PIW2;B7Z2T4;E9PN83;Q15700;H7C325;B5MCC5;B4E2H8;F8W750;C9IYP1;C9JN61;C9JCP6;A8MUT6;H7C166;C9J110;F2Z2L0;C9JUA9;A8MUT9;C9JWP9;C9JYG3;O14909;Q6ZSU2;P78352	A0A0C4DFT3;Q12959;E7EQD7	Disks large homolog 1	DLG1	>tr|A0A0C4DFT3|A0A0C4DFT3_HUMAN Disks large homolog 1 OS=Homo sapiens GN=DLG1 PE=1 SV=1;>sp|Q12959|DLG1_HUMAN Disks large homolog 1 OS=Homo sapiens GN=DLG1 PE=1 SV=2;>tr|E7EQD7|E7EQD7_HUMAN Disks large homolog 1 OS=Homo sapiens GN=DLG1 PE=1 SV=1	ENSG00000075711	ENSP00000321087;ENSP00000345731;ENSP00000350303;ENSP00000376186;ENSP00000376187;ENSP00000391732;ENSP00000396658;ENSP00000398939;ENSP00000407531;ENSP00000411278;ENSP00000413238	DLG1_HUMAN;E7EQD7_HUMAN	Not Sig	logFC < 2.0	UNCERTAIN
284	25.6167	25.5423	25.5029	25.8093	25.0194	25.1936	25.3385	25.3805	NA	NA	NA	NA	NA	290	1.95449	0.351491	-0.384809	-0.182693	A0A0C4DFU2;P04179;A0A0C4DFU1;F5H4R2;F5GYZ5;F5H3C5;A0A0C4DG56;G8JLJ2;G5E9P6;F5GXZ9;REV__Q8N4P2;REV__Q86WT1	A0A0C4DFU2;P04179;A0A0C4DFU1;F5H4R2;F5GYZ5;F5H3C5;A0A0C4DG56	Superoxide dismutase [Mn], mitochondrial	SOD2	>tr|A0A0C4DFU2|A0A0C4DFU2_HUMAN Superoxide dismutase OS=Homo sapiens GN=SOD2 PE=1 SV=1;>sp|P04179|SODM_HUMAN Superoxide dismutase [Mn], mitochondrial OS=Homo sapiens GN=SOD2 PE=1 SV=2;>tr|A0A0C4DFU1|A0A0C4DFU1_HUMAN Superoxide dismutase OS=Homo sapiens GN=	ENSG00000112096	ENSP00000337127;ENSP00000356021;ENSP00000356022;ENSP00000439191;ENSP00000441362;ENSP00000445015;ENSP00000446252	F5GYZ5_HUMAN;F5H3C5_HUMAN;F5H4R2_HUMAN;SODM_HUMAN	Not Sig	logFC < 2.0	UNCERTAIN
285	22.1791	22.4356	22.3646	22.0908	21.2572	20.8097	21.5224	21.5596	NA	NA	NA	NA	NA	292	2.67373	0.0635658	-0.98029	-0.447534	A0A0C4DFX3;Q9Y6C2;A0A0A0MT20	A0A0C4DFX3;Q9Y6C2	EMILIN-1	EMILIN1	>tr|A0A0C4DFX3|A0A0C4DFX3_HUMAN EMILIN-1 OS=Homo sapiens GN=EMILIN1 PE=1 SV=1;>sp|Q9Y6C2|EMIL1_HUMAN EMILIN-1 OS=Homo sapiens GN=EMILIN1 PE=1 SV=2	ENSG00000138080	ENSP00000369677	EMIL1_HUMAN	Not Sig	logFC < 2.0	UNCERTAIN
286	24.4559	24.6527	24.197	24.7908	24.1765	24.4585	24.65	24.814	NA	NA	NA	NA	NA	293	0.00113776	0.998532	0.000642776	0.000293766	A0A0C4DFX9;Q9H3P2;H0Y3X6;C9JHL4;C9JEM7;H7C2C7;H7C0W2;F8W954;F8WF98;H7C2M8	A0A0C4DFX9;Q9H3P2;H0Y3X6;C9JHL4	Negative elongation factor A	NELFA	>tr|A0A0C4DFX9|A0A0C4DFX9_HUMAN Negative elongation factor A OS=Homo sapiens GN=NELFA PE=1 SV=1;>sp|Q9H3P2|NELFA_HUMAN Negative elongation factor A OS=Homo sapiens GN=NELFA PE=1 SV=3;>tr|H0Y3X6|H0Y3X6_HUMAN Negative elongation factor A (Fragment) OS=Homo s	ENSG00000185049	ENSP00000372335;ENSP00000387647;ENSP00000395761;ENSP00000399165	C9JHL4_HUMAN;H0Y3X6_HUMAN;NELFA_HUMAN	Not Sig	logFC < 2.0	UNCERTAIN
287	24.3061	24.5669	24.655	24.0468	23.8351	23.5565	23.7819	23.5334	NA	NA	NA	NA	NA	295	2.41198	0.154514	-0.717005	-0.332343	A0A0C4DG02;Q9Y6K1;F8WE91	A0A0C4DG02;Q9Y6K1;F8WE91	DNA (cytosine-5)-methyltransferase 3A	DNMT3A	>tr|A0A0C4DG02|A0A0C4DG02_HUMAN DNA (cytosine-5)-methyltransferase 3A OS=Homo sapiens GN=DNMT3A PE=1 SV=1;>sp|Q9Y6K1|DNM3A_HUMAN DNA (cytosine-5)-methyltransferase 3A OS=Homo sapiens GN=DNMT3A PE=1 SV=4;>tr|F8WE91|F8WE91_HUMAN DNA (cytosine-5)-methyltransf	ENSG00000119772;GO:0005737;GO:0044464	ENSG00000119772;ENSP00000370132	F8WE91_HUMAN;Homo sapiens	Not Sig	logFC < 2.0	UNCERTAIN
288	24.6436	24.7522	24.9702	24.9444	24.4457	24.7182	24.975	24.7834	NA	NA	NA	NA	NA	296	0.302701	0.784673	-0.0970306	-0.0454562	E7EW77;A0A0C4DG21;F8WAL6;Q9NYB9;E9PEZ7;E7EP65;B7Z836;H7C3Q7;H0Y6B5;F8WBL5;F8WEB9;E7EUA1;F8WAU3;F8WCD7;F8WAZ8	E7EW77;A0A0C4DG21;F8WAL6;Q9NYB9;E9PEZ7;E7EP65;B7Z836	Abl interactor 2	ABI2	>tr|E7EW77|E7EW77_HUMAN Abl interactor 2 OS=Homo sapiens GN=ABI2 PE=1 SV=1;>tr|A0A0C4DG21|A0A0C4DG21_HUMAN Abl interactor 2 OS=Homo sapiens GN=ABI2 PE=1 SV=1;>tr|F8WAL6|F8WAL6_HUMAN Abl interactor 2 OS=Homo sapiens GN=ABI2 PE=1 SV=2;>sp|Q9NYB9|ABI2_HUMAN A	ENSG00000138443	ENSP00000261016;ENSP00000261017;ENSP00000261018;ENSP00000391433;ENSP00000396249;ENSP00000408898;ENSP00000414703	ABI2_HUMAN;B7Z836_HUMAN;E7EP65_HUMAN;E7EW77_HUMAN;E9PEZ7_HUMAN;F8WAL6_HUMAN	Not Sig	logFC < 2.0	UNCERTAIN
289	20.5371	21.1601	21.1745	21.9607	20.9999	22.0018	22.5316	22.5244	NA	NA	NA	NA	NA	299	0.877748	0.159802	0.806338	0.327326	A0A0C4DG44;O43464	A0A0C4DG44;O43464	Serine protease HTRA2, mitochondrial	HTRA2	>tr|A0A0C4DG44|A0A0C4DG44_HUMAN Serine protease HTRA2, mitochondrial (Fragment) OS=Homo sapiens GN=HTRA2 PE=1 SV=1;>sp|O43464|HTRA2_HUMAN Serine protease HTRA2, mitochondrial OS=Homo sapiens GN=HTRA2 PE=1 SV=2	ENSG00000115317	ENSP00000258080;ENSP00000312893;ENSP00000399166	HTRA2_HUMAN	Not Sig	logFC < 2.0	UNCERTAIN
290	25.9884	26.1364	26.4053	26.0233	26.519	26.1761	26.0339	25.7796	NA	NA	NA	NA	NA	302	0.0210544	0.985709	-0.011188	-0.00513016	A0A0C4DG89;Q7L014;D6RJA6;H0Y9U3	A0A0C4DG89;Q7L014	Probable ATP-dependent RNA helicase DDX46	DDX46	>tr|A0A0C4DG89|A0A0C4DG89_HUMAN Probable ATP-dependent RNA helicase DDX46 OS=Homo sapiens GN=DDX46 PE=1 SV=1;>sp|Q7L014|DDX46_HUMAN Probable ATP-dependent RNA helicase DDX46 OS=Homo sapiens GN=DDX46 PE=1 SV=2	ENSG00000145833	ENSP00000346236;ENSP00000416534	DDX46_HUMAN	Not Sig	logFC < 2.0	UNCERTAIN
291	25.7191	25.5971	25.5249	25.7609	24.9655	25.3737	25.1952	25.6445	NA	NA	NA	NA	NA	303	1.22547	0.387136	-0.355774	-0.165215	A0A0C4DGA2;O75521;F1LLU7;F8WAW4;C9JB63;F8W6J1	A0A0C4DGA2;O75521;F1LLU7	Enoyl-CoA delta isomerase 2, mitochondrial	ECI2	>tr|A0A0C4DGA2|A0A0C4DGA2_HUMAN Enoyl-CoA delta isomerase 2, mitochondrial OS=Homo sapiens GN=ECI2 PE=1 SV=1;>sp|O75521|ECI2_HUMAN Enoyl-CoA delta isomerase 2, mitochondrial OS=Homo sapiens GN=ECI2 PE=1 SV=4;>tr|F1LLU7|F1LLU7_HUMAN Enoyl-CoA delta isomeras	ENSG00000198721	ENSP00000354737;ENSP00000369461;ENSP00000369468;ENSP00000417803;ENSP00000420309	ECI2_HUMAN;F1LLU7_HUMAN	Not Sig	logFC < 2.0	UNCERTAIN
292	23.5691	23.3728	23.44	23.3647	23.7229	23.3346	23.1659	23.4646	NA	NA	NA	NA	NA	304	0.0401483	0.979487	-0.0146441	-0.00688612	A0A0C4DGA6;Q14527;H7C5K0	A0A0C4DGA6;Q14527	Helicase-like transcription factor	HLTF	>tr|A0A0C4DGA6|A0A0C4DGA6_HUMAN Helicase-like transcription factor OS=Homo sapiens GN=HLTF PE=1 SV=1;>sp|Q14527|HLTF_HUMAN Helicase-like transcription factor OS=Homo sapiens GN=HLTF PE=1 SV=2	ENSG00000071794	ENSP00000308944;ENSP00000376644;ENSP00000420429;ENSP00000420745	HLTF_HUMAN	Not Sig	logFC < 2.0	UNCERTAIN
293	22.5071	22.636	22.2395	22.6027	21.7432	22.5778	22.5796	22.6922	NA	NA	NA	NA	NA	306	0.158671	0.790157	-0.098135	-0.0438571	A0A0C4DGB2;P48506;E1CEI4;D6RGF8;D6R959;H0Y9I7	A0A0C4DGB2;P48506;E1CEI4	Glutamate--cysteine ligase catalytic subunit	GCLC	>tr|A0A0C4DGB2|A0A0C4DGB2_HUMAN Glutamate--cysteine ligase catalytic subunit OS=Homo sapiens GN=GCLC PE=1 SV=1;>sp|P48506|GSH1_HUMAN Glutamate--cysteine ligase catalytic subunit OS=Homo sapiens GN=GCLC PE=1 SV=2;>tr|E1CEI4|E1CEI4_HUMAN Glutamate--cysteine	ENSG00000001084	ENSP00000229416;ENSP00000421908	E1CEI4_HUMAN;GSH1_HUMAN	Not Sig	logFC < 2.0	UNCERTAIN
294	25.3063	25.3085	24.84	25.2774	25.2223	25.6758	25.7095	26.064	NA	NA	NA	NA	NA	307	1.23842	0.285561	0.484897	0.219697	A0A0C4DGB5;E9PCH5;E7EVY3;B7Z574;P20810;E7ES10;E7EQ12;A0A0A0MR45;E7EQA0;H0Y7F0;H0YD33;H0Y9H6;E9PDE4;H0Y944;E9PSG1;F8W7E0;D6RC54;A0A0C4DGD1;H0YA91;D6RAA8;D6RGF7;D6RBR1;E7EQK6;E7EN75	A0A0C4DGB5;E9PCH5;E7EVY3;B7Z574;P20810;E7ES10;E7EQ12;A0A0A0MR45;E7EQA0;H0Y7F0;H0YD33;H0Y9H6;E9PDE4	Calpastatin	CAST	>tr|A0A0C4DGB5|A0A0C4DGB5_HUMAN Calpastatin OS=Homo sapiens GN=CAST PE=1 SV=1;>tr|E9PCH5|E9PCH5_HUMAN Calpastatin OS=Homo sapiens GN=CAST PE=1 SV=1;>tr|E7EVY3|E7EVY3_HUMAN Calpastatin OS=Homo sapiens GN=CAST PE=1 SV=1;>tr|B7Z574|B7Z574_HUMAN Calpastatin OS	ENSG00000153113	ENSP00000312523;ENSP00000320319;ENSP00000339914;ENSP00000343421;ENSP00000352098;ENSP00000379158;ENSP00000412374;ENSP00000421130;ENSP00000422325;ENSP00000422929;ENSP00000423638;ENSP00000424160;ENSP00000425670;ENSP00000425721;ENSP00000425787;ENSP00000426946;ENSP00000427195;ENSP00000432878	B7Z574_HUMAN;E7EQ12_HUMAN;E7EQA0_HUMAN;E7ES10_HUMAN;E7EVY3_HUMAN;E9PCH5_HUMAN;E9PDE4_HUMAN;H0Y7F0_HUMAN;H0Y9H6_HUMAN;H0YD33_HUMAN;ICAL_HUMAN	Not Sig	logFC < 2.0	UNCERTAIN
295	28.3036	28.5851	29.0644	28.3319	28.8654	28.2671	28.3195	27.8374	NA	NA	NA	NA	NA	308	0.398181	0.527684	-0.248909	-0.109426	F5GWX5;A0A0C4DGG9;Q14839;Q8TDI0;K7EMY3;F2Z2R5;F5H6N4	F5GWX5;A0A0C4DGG9;Q14839	Chromodomain-helicase-DNA-binding protein 4	CHD4	>tr|F5GWX5|F5GWX5_HUMAN Chromodomain-helicase-DNA-binding protein 4 OS=Homo sapiens GN=CHD4 PE=1 SV=1;>tr|A0A0C4DGG9|A0A0C4DGG9_HUMAN Chromodomain-helicase-DNA-binding protein 4 OS=Homo sapiens GN=CHD4 PE=1 SV=1;>sp|Q14839|CHD4_HUMAN Chromodomain-helicase-	ENSG00000111642	ENSP00000312419;ENSP00000349508;ENSP00000440392;ENSP00000440542	CHD4_HUMAN;F5GWX5_HUMAN	Not Sig	logFC < 2.0	UNCERTAIN
296	23.8109	23.5753	23.2671	23.8358	22.4532	23.1472	23.4849	23.2866	NA	NA	NA	NA	NA	309	1.0545	0.261001	-0.529297	-0.234176	A0A0C4DGH0;Q5ZPR3;H0YL10;H0YK40;H0YK59;H0YLT8;H0YN85;H0YN29	A0A0C4DGH0;Q5ZPR3;H0YL10	CD276 antigen	CD276	>tr|A0A0C4DGH0|A0A0C4DGH0_HUMAN CD276 antigen OS=Homo sapiens GN=CD276 PE=1 SV=1;>sp|Q5ZPR3|CD276_HUMAN CD276 antigen OS=Homo sapiens GN=CD276 PE=1 SV=1;>tr|H0YL10|H0YL10_HUMAN CD276 antigen (Fragment) OS=Homo sapiens GN=CD276 PE=1 SV=1	ENSG00000103855	ENSP00000320058;ENSP00000320084;ENSP00000441087;ENSP00000452736;ENSP00000453014;ENSP00000454940	CD276_HUMAN;H0YL10_HUMAN	Not Sig	logFC < 2.0	UNCERTAIN
297	23.1402	23.2246	22.9312	23.1067	22.8331	22.9153	23.1619	23.1478	NA	NA	NA	NA	NA	310	0.360614	0.804846	-0.0861745	-0.040972	A0A0C4DGH2;P62070;E9PK85;P10301;E9PQK5;E9PQC5;E9PQ87	A0A0C4DGH2;P62070;E9PK85	Ras-related protein R-Ras2	RRAS2	>tr|A0A0C4DGH2|A0A0C4DGH2_HUMAN Ras-related protein R-Ras2 OS=Homo sapiens GN=RRAS2 PE=1 SV=1;>sp|P62070|RRAS2_HUMAN Ras-related protein R-Ras2 OS=Homo sapiens GN=RRAS2 PE=1 SV=1;>tr|E9PK85|E9PK85_HUMAN Ras-related protein R-Ras2 (Fragment) OS=Homo sapiens	ENSG00000133818;ENSG00000262489	ENSP00000256196;ENSP00000403282;ENSP00000431954;ENSP00000433230;ENSP00000434104;ENSP00000435453;ENSP00000437083;ENSP00000437547;ENSP00000458232;ENSP00000458679;ENSP00000459423;ENSP00000460504;ENSP00000460749;ENSP00000460998	E9PK85_HUMAN;RRAS2_HUMAN	Not Sig	logFC < 2.0	UNCERTAIN
298	26.6505	26.8953	26.8165	26.4531	26.9901	26.6022	26.6109	26.4324	NA	NA	NA	NA	NA	315	0.108448	0.902889	-0.04496	-0.0208807	A0A0C4DGQ5;P04632;K7ELJ7;K7EM73;A0A075B7C0;U3KQE2;K7EIV0;K7EKD8;K7ES78;K7EMQ1;U3KPR7	A0A0C4DGQ5;P04632;K7ELJ7;K7EM73;A0A075B7C0;U3KQE2;K7EIV0;K7EKD8	Calpain small subunit 1	CAPNS1	>tr|A0A0C4DGQ5|A0A0C4DGQ5_HUMAN Calpain small subunit 1 OS=Homo sapiens GN=CAPNS1 PE=1 SV=1;>sp|P04632|CPNS1_HUMAN Calpain small subunit 1 OS=Homo sapiens GN=CAPNS1 PE=1 SV=1;>tr|K7ELJ7|K7ELJ7_HUMAN Calpain small subunit 1 OS=Homo sapiens GN=CAPNS1 PE=1 SV	ENSG00000126247	ENSP00000246533;ENSP00000464849;ENSP00000464903;ENSP00000465575;ENSP00000466113;ENSP00000466386;ENSP00000468041	CPNS1_HUMAN;K7EIV0_HUMAN;K7EKD8_HUMAN;K7ELJ7_HUMAN;K7EM73_HUMAN	Not Sig	logFC < 2.0	UNCERTAIN
299	24.0382	24.2119	24.169	24.383	23.3849	23.3616	23.6721	23.6481	NA	NA	NA	NA	NA	317	3.10942	0.163467	-0.683831	-0.324182	A0A0C4DGS0;P56556;R4GN43	A0A0C4DGS0;P56556;R4GN43	NADH dehydrogenase [ubiquinone] 1 alpha subcomplex subunit 6	NDUFA6	>tr|A0A0C4DGS0|A0A0C4DGS0_HUMAN NADH dehydrogenase [ubiquinone] 1 alpha subcomplex subunit 6 OS=Homo sapiens GN=NDUFA6 PE=1 SV=1;>sp|P56556|NDUA6_HUMAN NADH dehydrogenase [ubiquinone] 1 alpha subcomplex subunit 6 OS=Homo sapiens GN=NDUFA6 PE=1 SV=3;>tr|R4G	ENSG00000184983;ENSG00000262894	ENSP00000418842;ENSP00000459940	NDUA6_HUMAN	Not Sig	logFC < 2.0	UNCERTAIN
300	27.8902	28.0083	28.1473	27.7533	27.7886	27.4004	27.3812	27.2258	NA	NA	NA	NA	NA	318	1.85182	0.262504	-0.500817	-0.233346	A0A0C4DGS1;P39656;U3KQ84	A0A0C4DGS1;P39656;U3KQ84	Dolichyl-diphosphooligosaccharide--protein glycosyltransferase 48 kDa subunit	DDOST	>tr|A0A0C4DGS1|A0A0C4DGS1_HUMAN Dolichyl-diphosphooligosaccharide--protein glycosyltransferase 48 kDa subunit OS=Homo sapiens GN=DDOST PE=1 SV=1;>sp|P39656|OST48_HUMAN Dolichyl-diphosphooligosaccharide--protein glycosyltransferase 48 kDa subunit OS=Homo sa	ENSG00000244038	ENSP00000364188	OST48_HUMAN	Not Sig	logFC < 2.0	UNCERTAIN
301	24.4771	24.9884	24.2654	24.1334	24.2845	24.3691	24.3684	24.19	NA	NA	NA	NA	NA	319	0.366679	0.65708	-0.16309	-0.074378	A0A0C4DGS5;Q08379;B7ZC06;H0Y7B8;A0A087WYC0	A0A0C4DGS5;Q08379	Golgin subfamily A member 2	GOLGA2	>tr|A0A0C4DGS5|A0A0C4DGS5_HUMAN Golgi autoantigen, golgin subfamily a, 2, isoform CRA_a OS=Homo sapiens GN=GOLGA2 PE=1 SV=1;>sp|Q08379|GOGA2_HUMAN Golgin subfamily A member 2 OS=Homo sapiens GN=GOLGA2 PE=1 SV=3	ENSG00000167110	ENSP00000416097	GOGA2_HUMAN	Not Sig	logFC < 2.0	UNCERTAIN
302	24.5524	24.9335	25.1467	24.5858	24.5203	24.4296	24.5585	24.1619	NA	NA	NA	NA	NA	322	1.2115	0.359361	-0.387047	-0.178479	A0A0C4DGV5;O95218	A0A0C4DGV5;O95218	Zinc finger Ran-binding domain-containing protein 2	ZRANB2	>tr|A0A0C4DGV5|A0A0C4DGV5_HUMAN Zinc finger Ran-binding domain-containing protein 2 OS=Homo sapiens GN=ZRANB2 PE=1 SV=1;>sp|O95218|ZRAB2_HUMAN Zinc finger Ran-binding domain-containing protein 2 OS=Homo sapiens GN=ZRANB2 PE=1 SV=2	ENSG00000132485	ENSP00000254821;ENSP00000359958	ZRAB2_HUMAN	Not Sig	logFC < 2.0	UNCERTAIN
303	24.7715	24.3709	24.5603	24.2368	24.8209	24.9834	24.8515	24.8516	NA	NA	NA	NA	NA	323	1.73954	0.3475	0.391935	0.184714	A0A0C4DGW6;A6NDU8	A0A0C4DGW6;A6NDU8	UPF0600 protein C5orf51	C5orf51	>tr|A0A0C4DGW6|A0A0C4DGW6_HUMAN UPF0600 protein C5orf51 OS=Homo sapiens GN=C5orf51 PE=1 SV=1;>sp|A6NDU8|CE051_HUMAN UPF0600 protein C5orf51 OS=Homo sapiens GN=C5orf51 PE=1 SV=1	ENSG00000205765	ENSP00000371061	CE051_HUMAN	Not Sig	logFC < 2.0	UNCERTAIN
304	24.5159	24.7986	25.0963	24.7972	24.7597	24.4301	24.5621	24.351	NA	NA	NA	NA	NA	324	0.951074	0.472696	-0.276295	-0.128606	A0A0C4DGZ0;P24928;A0A087WWE2	A0A0C4DGZ0;P24928;A0A087WWE2	DNA-directed RNA polymerase II subunit RPB1	POLR2A	>tr|A0A0C4DGZ0|A0A0C4DGZ0_HUMAN DNA-directed RNA polymerase OS=Homo sapiens GN=POLR2A PE=1 SV=1;>sp|P24928|RPB1_HUMAN DNA-directed RNA polymerase II subunit RPB1 OS=Homo sapiens GN=POLR2A PE=1 SV=2;>tr|A0A087WWE2|A0A087WWE2_HUMAN DNA-directed RNA polymeras	ENSG00000181222	ENSP00000314949	RPB1_HUMAN	Not Sig	logFC < 2.0	UNCERTAIN
305	25.278	24.9784	24.5174	25.4373	23.8992	24.1861	24.7145	25.3391	NA	NA	NA	NA	NA	325	0.662852	0.288426	-0.518034	-0.218038	A0A0C4DGZ9;O14773	A0A0C4DGZ9;O14773	Tripeptidyl-peptidase 1	TPP1	>tr|A0A0C4DGZ9|A0A0C4DGZ9_HUMAN Tripeptidyl-peptidase 1 OS=Homo sapiens GN=TPP1 PE=1 SV=1;>sp|O14773|TPP1_HUMAN Tripeptidyl-peptidase 1 OS=Homo sapiens GN=TPP1 PE=1 SV=2	ENSG00000166340	ENSP00000299427;ENSP00000437066	TPP1_HUMAN	Not Sig	logFC < 2.0	UNCERTAIN
306	24.5954	24.7382	25.2866	24.601	25.1221	24.6858	24.3588	24.1034	NA	NA	NA	NA	NA	332	0.37752	0.545716	-0.237769	-0.104549	J3QR29;A0A0D9SEI3;B7ZVY7;A0A0D9SER5;A0A0D9SEN2;J3QR44;P21127	J3QR29;A0A0D9SEI3;B7ZVY7;A0A0D9SER5;A0A0D9SEN2;J3QR44;P21127	Cyclin-dependent kinase 11B	CDK11B;CDC2L1	>tr|J3QR29|J3QR29_HUMAN Cyclin-dependent kinase 11B OS=Homo sapiens GN=CDK11B PE=1 SV=2;>tr|A0A0D9SEI3|A0A0D9SEI3_HUMAN Cyclin-dependent kinase 11B OS=Homo sapiens GN=CDK11B PE=1 SV=1;>tr|B7ZVY7|B7ZVY7_HUMAN Cell division cycle 2-like 1 (PITSLRE proteins)	ENSG00000248333	ENSP00000464016;ENSP00000464036	B7ZVY7_HUMAN;CD11B_HUMAN;J3QR29_HUMAN;J3QR44_HUMAN	Not Sig	logFC < 2.0	UNCERTAIN
307	23.5745	23.9339	23.886	23.5644	21.731	23.7893	23.34	21.3565	NA	NA	NA	NA	NA	333	1.01252	0.0610447	-1.1855	-0.455327	A0A0D9SEM4;Q08170;A0A0D9SGD2;S4R2X6	A0A0D9SEM4;Q08170	Serine/arginine-rich splicing factor 4	SRSF4	>tr|A0A0D9SEM4|A0A0D9SEM4_HUMAN Serine/arginine-rich-splicing factor 4 (Fragment) OS=Homo sapiens GN=SRSF4 PE=1 SV=1;>sp|Q08170|SRSF4_HUMAN Serine/arginine-rich splicing factor 4 OS=Homo sapiens GN=SRSF4 PE=1 SV=2	ENSG00000116350	ENSP00000362900	SRSF4_HUMAN	Not Sig	logFC < 2.0	UNCERTAIN
308	24.0065	24.2266	23.4506	24.2164	24.1647	24.6475	24.6864	24.654	NA	NA	NA	NA	NA	334	1.36265	0.232061	0.563131	0.253585	H0YNT2;A0A0D9SES8;H0YKT5;H0YKN8;H0YL70;Q04726;F5H7D6;H0YNI7;H0YLI3;H0YKH0;H0YLW9;K7EMK7;Q04725;H3BUH5;H0YKH5;K7EJR7	H0YNT2;A0A0D9SES8;H0YKT5;H0YKN8;H0YL70;Q04726;F5H7D6;H0YNI7;H0YLI3	Transducin-like enhancer protein 3	LITAF;TLE3	>tr|H0YNT2|H0YNT2_HUMAN Transducin-like enhancer protein 3 OS=Homo sapiens GN=TLE3 PE=1 SV=1;>tr|A0A0D9SES8|A0A0D9SES8_HUMAN Transducin-like enhancer protein 3 OS=Homo sapiens GN=TLE3 PE=1 SV=1;>tr|H0YKT5|H0YKT5_HUMAN Transducin-like enhancer protein 3 OS=	ENSG00000140332	ENSP00000319233;ENSP00000394717;ENSP00000442594;ENSP00000452871;ENSP00000452881;ENSP00000452933;ENSP00000453081;ENSP00000453083;ENSP00000453107;ENSP00000453219;ENSP00000453760;ENSP00000454029;ENSP00000454141	F5H7D6_HUMAN;H0YKN8_HUMAN;H0YKT5_HUMAN;H0YL70_HUMAN;H0YLI3_HUMAN;H0YNI7_HUMAN;H0YNT2_HUMAN;TLE3_HUMAN	Not Sig	logFC < 2.0	UNCERTAIN
309	24.2558	24.481	24.7609	24.1327	25.3557	25.245	25.163	24.8658	NA	NA	NA	NA	NA	335	2.30437	0.138179	0.749774	0.344977	A0A0D9SEY1;G5E948;O95819;E7ENQ1;G3XAA2;E7EX83;A0A0D9SG62;H7C360;H7C0P6;H7C3Z6;E7ETN6	A0A0D9SEY1;G5E948;O95819;E7ENQ1;G3XAA2;E7EX83;A0A0D9SG62;H7C360;H7C0P6	Mitogen-activated protein kinase kinase kinase kinase 4	MAP4K4	>tr|A0A0D9SEY1|A0A0D9SEY1_HUMAN Mitogen-activated protein kinase kinase kinase kinase 4 OS=Homo sapiens GN=MAP4K4 PE=1 SV=1;>tr|G5E948|G5E948_HUMAN Mitogen-activated protein kinase kinase kinase kinase 4 OS=Homo sapiens GN=MAP4K4 PE=1 SV=2;>sp|O95819|M4K4_	ENSG00000071054	ENSP00000281111;ENSP00000313644;ENSP00000314363;ENSP00000387370;ENSP00000389752;ENSP00000396066;ENSP00000409720	E7ENQ1_HUMAN;E7EX83_HUMAN;G3XAA2_HUMAN;G5E948_HUMAN;H7C0P6_HUMAN;H7C360_HUMAN;M4K4_HUMAN	Not Sig	logFC < 2.0	UNCERTAIN
310	29.2361	29.145	29.0943	29.2691	29.1661	29.1787	29.2524	29.1335	NA	NA	NA	NA	NA	338	0.0246601	0.995677	-0.00342798	-0.00167424	A0A0D9SFB3;A0A0D9SG12;A0A0D9SF53;O00571;A0A0J9YVQ7;A0A087WVZ1;A0A0J9YYH6;B4DLA0;A0A087WX09	A0A0D9SFB3;A0A0D9SG12;A0A0D9SF53;O00571	ATP-dependent RNA helicase DDX3X	DDX3X	>tr|A0A0D9SFB3|A0A0D9SFB3_HUMAN ATP-dependent RNA helicase DDX3X OS=Homo sapiens GN=DDX3X PE=1 SV=1;>tr|A0A0D9SG12|A0A0D9SG12_HUMAN ATP-dependent RNA helicase DDX3X OS=Homo sapiens GN=DDX3X PE=1 SV=1;>tr|A0A0D9SF53|A0A0D9SF53_HUMAN ATP-dependent RNA helica	ENSG00000215301	ENSP00000382840;ENSP00000392494	DDX3X_HUMAN	Not Sig	logFC < 2.0	UNCERTAIN
311	23.5657	23.5049	24.1355	23.6901	23.0609	20.4057	22.8524	21.0513	NA	NA	NA	NA	NA	340	1.50345	0.0136241	-1.88149	-0.703841	A0A0U1RQP1;A0A0D9SFE4;Q05193;A0A0D9SFB1	A0A0U1RQP1;A0A0D9SFE4;Q05193;A0A0D9SFB1	Dynamin-1	DNM1	>tr|A0A0U1RQP1|A0A0U1RQP1_HUMAN Dynamin-1 OS=Homo sapiens GN=DNM1 PE=4 SV=1;>tr|A0A0D9SFE4|A0A0D9SFE4_HUMAN Dynamin-1 OS=Homo sapiens GN=DNM1 PE=1 SV=1;>sp|Q05193|DYN1_HUMAN Dynamin-1 OS=Homo sapiens GN=DNM1 PE=1 SV=2;>tr|A0A0D9SFB1|A0A0D9SFB1_HUMAN Dynami	ENSG00000106976	ENSP00000345680;ENSP00000362014;ENSP00000377219;ENSP00000419225;ENSP00000420045	DYN1_HUMAN	Not Sig	logFC < 2.0	UNCERTAIN
312	22.057	21.7326	22.3027	21.5432	20.3112	21.333	21.3203	22.1814	NA	NA	NA	NA	NA	341	0.72792	0.229369	-0.622413	-0.257403	A0A0D9SFK2;Q92614;H0YEV9	A0A0D9SFK2;Q92614	Unconventional myosin-XVIIIa	MYO18A	>tr|A0A0D9SFK2|A0A0D9SFK2_HUMAN Unconventional myosin-XVIIIa OS=Homo sapiens GN=MYO18A PE=1 SV=1;>sp|Q92614|MY18A_HUMAN Unconventional myosin-XVIIIa OS=Homo sapiens GN=MYO18A PE=1 SV=3	ENSG00000196535	ENSP00000434228;ENSP00000435932;ENSP00000437073	MY18A_HUMAN	Not Sig	logFC < 2.0	UNCERTAIN
313	24.2451	24.2839	23.784	24.2688	24.0781	23.9803	23.944	24.2024	NA	NA	NA	NA	NA	342	0.294214	0.789096	-0.0942321	-0.0441599	A0A0D9SFL2;Q96T60;M0R3C8;M0QYH2;M0QYI1;A0A0D9SEV0;M0R000;A0A0D9SFD6;M0QX49;A0A0D9SFU1	A0A0D9SFL2;Q96T60;M0R3C8;M0QYH2;M0QYI1	Bifunctional polynucleotide phosphatase/kinase;Polynucleotide 3-phosphatase;Polynucleotide 5-hydroxyl-kinase	PNKP	>tr|A0A0D9SFL2|A0A0D9SFL2_HUMAN Bifunctional polynucleotide phosphatase/kinase OS=Homo sapiens GN=PNKP PE=1 SV=1;>sp|Q96T60|PNKP_HUMAN Bifunctional polynucleotide phosphatase/kinase OS=Homo sapiens GN=PNKP PE=1 SV=1;>tr|M0R3C8|M0R3C8_HUMAN Bifunctional pol	ENSG00000039650	ENSP00000323511;ENSP00000469826;ENSP00000469848;ENSP00000472300;ENSP00000473137	M0QYH2_HUMAN;M0QYI1_HUMAN;M0R3C8_HUMAN;PNKP_HUMAN	Not Sig	logFC < 2.0	UNCERTAIN
314	23.9013	24.0867	24.0403	24.0564	24.2905	24.3288	23.8405	23.708	NA	NA	NA	NA	NA	343	0.044556	0.965382	0.0207524	0.00959695	A0A0D9SG77;Q05086;A0A0D9SGI3;A0A0D9SF91;S4R306	A0A0D9SG77;Q05086	Ubiquitin-protein ligase E3A	UBE3A	>tr|A0A0D9SG77|A0A0D9SG77_HUMAN Ubiquitin-protein ligase E3A OS=Homo sapiens GN=UBE3A PE=1 SV=1;>sp|Q05086|UBE3A_HUMAN Ubiquitin-protein ligase E3A OS=Homo sapiens GN=UBE3A PE=1 SV=4	ENSG00000114062	ENSP00000232165;ENSP00000381045;ENSP00000401265;ENSP00000411258;ENSP00000457771	UBE3A_HUMAN	Not Sig	logFC < 2.0	UNCERTAIN
315	25.5759	25.7395	25.5831	26.0971	26.2284	26.1801	26.2131	26.0205	NA	NA	NA	NA	NA	344	1.69803	0.326843	0.41165	0.193167	A0A0D9SGE8;Q8IWS0;Q5JRC6	A0A0D9SGE8;Q8IWS0;Q5JRC6	PHD finger protein 6	PHF6	>tr|A0A0D9SGE8|A0A0D9SGE8_HUMAN PHD finger protein 6 OS=Homo sapiens GN=PHF6 PE=1 SV=1;>sp|Q8IWS0|PHF6_HUMAN PHD finger protein 6 OS=Homo sapiens GN=PHF6 PE=1 SV=1;>tr|Q5JRC6|Q5JRC6_HUMAN PHD finger protein 6 OS=Homo sapiens GN=PHF6 PE=1 SV=1	ENSG00000156531	ENSP00000329097;ENSP00000359835;ENSP00000359836;ENSP00000359839	PHF6_HUMAN;Q5JRC6_HUMAN	Not Sig	logFC < 2.0	UNCERTAIN
316	26.0519	26.0951	25.9153	25.7763	26.3564	25.6508	25.6598	25.5522	NA	NA	NA	NA	NA	346	0.331457	0.670563	-0.154824	-0.0704058	H9KV28;A0A0G2JH68;O60610;H7C2W8;B4E2I7	H9KV28;A0A0G2JH68;O60610	Protein diaphanous homolog 1	DIAPH1	>tr|H9KV28|H9KV28_HUMAN Protein diaphanous homolog 1 OS=Homo sapiens GN=DIAPH1 PE=1 SV=2;>tr|A0A0G2JH68|A0A0G2JH68_HUMAN Protein diaphanous homolog 1 OS=Homo sapiens GN=DIAPH1 PE=1 SV=1;>sp|O60610|DIAP1_HUMAN Protein diaphanous homolog 1 OS=Homo sapiens GN	ENSG00000131504	ENSP00000253811;ENSP00000373709;ENSP00000381565	DIAP1_HUMAN;H9KV28_HUMAN	Not Sig	logFC < 2.0	UNCERTAIN
317	22.9704	22.8553	23.1072	22.9552	23.2451	23.7416	23.7997	23.9932	NA	NA	NA	NA	NA	347	2.30055	0.153126	0.722842	0.333493	A0A0G2JHC2;Q6NYC8	A0A0G2JHC2;Q6NYC8	Phostensin	PPP1R18	>tr|A0A0G2JHC2|A0A0G2JHC2_HUMAN Phostensin OS=Homo sapiens GN=PPP1R18 PE=1 SV=1;>sp|Q6NYC8|PPR18_HUMAN Phostensin OS=Homo sapiens GN=PPP1R18 PE=1 SV=1	ENSG00000146112;ENSG00000206485;ENSG00000225060;ENSG00000229998;ENSG00000230341;ENSG00000231247;ENSG00000234000	ENSP00000274853;ENSP00000373067;ENSP00000382150;ENSP00000383400;ENSP00000388790;ENSP00000400129;ENSP00000400990;ENSP00000404066;ENSP00000405234;ENSP00000412456;ENSP00000413596;ENSP00000416648;ENSP00000446851;ENSP00000448468;ENSP00000449505;ENSP00000449677;ENSP00000450379	PPR18_HUMAN	Not Sig	logFC < 2.0	UNCERTAIN
318	23.0892	23.1745	23.5539	23.1576	23.3553	23.5431	23.2481	23.3055	NA	NA	NA	NA	NA	348	0.432166	0.732224	0.119187	0.056143	A0A0G2JIS2;Q96KQ7;A0A0G2JRR0;A0A0G2JRN8;A2ABF8;A0A0G2JIR1;A2ABF9;A0A0G2JK64;H0Y4K5	A0A0G2JIS2;Q96KQ7;A0A0G2JRR0;A0A0G2JRN8;A2ABF8;A0A0G2JIR1;A2ABF9;A0A0G2JK64	Histone-lysine N-methyltransferase EHMT2	EHMT2	>tr|A0A0G2JIS2|A0A0G2JIS2_HUMAN Histone-lysine N-methyltransferase EHMT2 OS=Homo sapiens GN=EHMT2 PE=1 SV=1;>sp|Q96KQ7|EHMT2_HUMAN Histone-lysine N-methyltransferase EHMT2 OS=Homo sapiens GN=EHMT2 PE=1 SV=3;>tr|A0A0G2JRR0|A0A0G2JRR0_HUMAN Histone-lysine N-	ENSG00000204371;ENSG00000206376;ENSG00000227333;ENSG00000232045;ENSG00000236759;ENSG00000238134	ENSP00000364678;ENSP00000364680;ENSP00000364687;ENSP00000372863;ENSP00000372864;ENSP00000379078;ENSP00000392305;ENSP00000396119;ENSP00000400838;ENSP00000406110;ENSP00000411035;ENSP00000416957	A2ABF8_HUMAN;A2ABF9_HUMAN;EHMT2_HUMAN	Not Sig	logFC < 2.0	UNCERTAIN
319	29.5405	29.6003	29.7991	30.39	28.272	28.2152	28.2235	28.2018	NA	NA	NA	NA	NA	349	3.76555	0.0126563	-1.60431	-0.731067	P0DMV9;P0DMV8;A0A0G2JIW1;V9GZ37;P48741	P0DMV9;P0DMV8;A0A0G2JIW1;V9GZ37	NA	HSPA1A	>sp|P0DMV9|HS71B_HUMAN Heat shock 70 kDa protein 1B OS=Homo sapiens GN=HSPA1B PE=1 SV=1;>sp|P0DMV8|HS71A_HUMAN Heat shock 70 kDa protein 1A OS=Homo sapiens GN=HSPA1A PE=1 SV=1;>tr|A0A0G2JIW1|A0A0G2JIW1_HUMAN Heat shock 70 kDa protein 1B OS=Homo sapiens GN=	NA	NA	NA	Not Sig	logFC < 2.0	UNCERTAIN
320	23.8893	24.088	24.2917	23.9933	24.4583	24.3409	24.1589	23.9574	NA	NA	NA	NA	NA	351	0.545972	0.649343	0.163286	0.0763393	A0A0G2JK44;P25440;H0Y6K2;U3KQA6;A0A0G2JHL0;E9PIQ3;A0A0G2JHN8;H0YDJ7;U3KPW0;E9PKQ9;H0Y799	A0A0G2JK44;P25440;H0Y6K2;U3KQA6;A0A0G2JHL0;E9PIQ3	Bromodomain-containing protein 2	BRD2	>tr|A0A0G2JK44|A0A0G2JK44_HUMAN Bromodomain-containing protein 2 OS=Homo sapiens GN=BRD2 PE=1 SV=1;>sp|P25440|BRD2_HUMAN Bromodomain-containing protein 2 OS=Homo sapiens GN=BRD2 PE=1 SV=2;>tr|H0Y6K2|H0Y6K2_HUMAN Bromodomain-containing protein 2 (Fragment)	ENSG00000204256;ENSG00000215077;ENSG00000234507;ENSG00000234704;ENSG00000235307	ENSP00000363958;ENSP00000363964;ENSP00000372588;ENSP00000378702;ENSP00000378704;ENSP00000382443;ENSP00000382444;ENSP00000382445;ENSP00000391246;ENSP00000399009;ENSP00000401791;ENSP00000405634;ENSP00000409145;ENSP00000409613;ENSP00000410994;ENSP00000412885;ENSP00000436322;ENSP00000446894;ENSP00000447519;ENSP00000447736;ENSP00000448429;ENSP00000449380;ENSP00000449609;ENSP00000449815	BRD2_HUMAN;E9PIQ3_HUMAN;H0Y6K2_HUMAN	Not Sig	logFC < 2.0	UNCERTAIN
321	24.7257	24.7771	25.0009	24.5349	25.1866	24.8536	24.9126	25.0564	NA	NA	NA	NA	NA	353	1.03243	0.512291	0.242683	0.114391	A0A0G2JPP5;A0A0G2JNZ2;Q14160;A0A0G2JMS7;H0YCG0;H0YDF9;Q5T0G3;Q9BTT6	A0A0G2JPP5;A0A0G2JNZ2;Q14160;A0A0G2JMS7	Protein scribble homolog	SCRIB	>tr|A0A0G2JPP5|A0A0G2JPP5_HUMAN Protein scribble homolog OS=Homo sapiens GN=SCRIB PE=1 SV=1;>tr|A0A0G2JNZ2|A0A0G2JNZ2_HUMAN Protein scribble homolog OS=Homo sapiens GN=SCRIB PE=1 SV=1;>sp|Q14160|SCRIB_HUMAN Protein scribble homolog OS=Homo sapiens GN=SCRIB	ENSG00000180900;ENSG00000260968	ENSP00000322938;ENSP00000349486;ENSP00000366756;ENSP00000455629;ENSP00000456561;ENSP00000456859	SCRIB_HUMAN	Not Sig	logFC < 2.0	UNCERTAIN
322	21.1355	21.9699	21.6636	21.4642	21.6171	21.5548	21.0167	21.4429	NA	NA	NA	NA	NA	354	0.282306	0.682226	-0.150417	-0.0677161	B7Z683;A0A0G2JQ41;Q12979;I3L0R7;A0A0G2JSE0;A0A0D9SGD7;I3L379	B7Z683;A0A0G2JQ41;Q12979;I3L0R7	Active breakpoint cluster region-related protein	ABR	>tr|B7Z683|B7Z683_HUMAN Active breakpoint cluster region-related protein OS=Homo sapiens GN=ABR PE=1 SV=1;>tr|A0A0G2JQ41|A0A0G2JQ41_HUMAN Active breakpoint cluster region-related protein (Fragment) OS=Homo sapiens GN=ABR PE=1 SV=1;>sp|Q12979|ABR_HUMAN Acti	ENSG00000159842	ENSP00000291107;ENSP00000303909;ENSP00000437429;ENSP00000442048;ENSP00000445198;ENSP00000458294;ENSP00000461565	ABR_HUMAN;B7Z683_HUMAN;I3L0R7_HUMAN	Not Sig	logFC < 2.0	UNCERTAIN
323	23.753	23.7264	23.9344	23.076	24.8856	24.2058	24.3807	23.6241	NA	NA	NA	NA	NA	355	1.05235	0.202686	0.6516	0.280746	A0A0G2JQ62;Q8NF37;A0A0G2JRI7	A0A0G2JQ62;Q8NF37;A0A0G2JRI7	Lysophosphatidylcholine acyltransferase 1	LPCAT1	>tr|A0A0G2JQ62|A0A0G2JQ62_HUMAN Lysophosphatidylcholine acyltransferase 1 (Fragment) OS=Homo sapiens GN=LPCAT1 PE=1 SV=1;>sp|Q8NF37|PCAT1_HUMAN Lysophosphatidylcholine acyltransferase 1 OS=Homo sapiens GN=LPCAT1 PE=1 SV=2;>tr|A0A0G2JRI7|A0A0G2JRI7_HUMAN Ly	ENSG00000153395	ENSP00000283415;ENSP00000423472	PCAT1_HUMAN	Not Sig	logFC < 2.0	UNCERTAIN
324	21.5102	21.8311	21.9614	21.2545	20.7233	21.6387	21.3962	21.022	NA	NA	NA	NA	NA	357	0.869327	0.318997	-0.444273	-0.196807	A0A0J9YVP0;O95714;H3BUQ1	A0A0J9YVP0;O95714	E3 ubiquitin-protein ligase HERC2	HERC2	>tr|A0A0J9YVP0|A0A0J9YVP0_HUMAN E3 ubiquitin-protein ligase HERC2 (Fragment) OS=Homo sapiens GN=HERC2 PE=1 SV=1;>sp|O95714|HERC2_HUMAN E3 ubiquitin-protein ligase HERC2 OS=Homo sapiens GN=HERC2 PE=1 SV=2	ENSG00000128731;ENSG00000263162	ENSP00000261609;ENSP00000458767	HERC2_HUMAN	Not Sig	logFC < 2.0	UNCERTAIN
325	27.8677	27.9726	27.9067	28.002	28.3435	27.986	27.9753	27.8902	NA	NA	NA	NA	NA	358	0.482355	0.744967	0.111552	0.0529915	A0A0J9YYL3;A0A0J9YXJ8;A0A0J9YVP6;A0A0J9YXX5;Q9UHX1;A0A0J9YVR6;E9PQ56;A0A0J9YWM1;H0YEM1;E9PN18;E9PMU7;E9PL19;H0YCP8	A0A0J9YYL3;A0A0J9YXJ8;A0A0J9YVP6;A0A0J9YXX5;Q9UHX1;A0A0J9YVR6;E9PQ56;A0A0J9YWM1;H0YEM1;E9PN18	Poly(U)-binding-splicing factor PUF60	PUF60	>tr|A0A0J9YYL3|A0A0J9YYL3_HUMAN Poly(U)-binding-splicing factor PUF60 (Fragment) OS=Homo sapiens GN=PUF60 PE=1 SV=1;>tr|A0A0J9YXJ8|A0A0J9YXJ8_HUMAN Poly(U)-binding-splicing factor PUF60 (Fragment) OS=Homo sapiens GN=PUF60 PE=1 SV=1;>tr|A0A0J9YVP6|A0A0J9YVP	ENSG00000179950;ENSG00000260485	ENSP00000322016;ENSP00000322036;ENSP00000395417;ENSP00000402953;ENSP00000431960;ENSP00000432610;ENSP00000434359;ENSP00000434863;ENSP00000436131;ENSP00000454436;ENSP00000454452;ENSP00000454822;ENSP00000455879;ENSP00000456170;ENSP00000456640	E9PN18_HUMAN;E9PQ56_HUMAN;H0YEM1_HUMAN;PUF60_HUMAN	Not Sig	logFC < 2.0	UNCERTAIN
326	20.4451	20.6859	21.2787	21.3118	21.1304	20.681	21.079	21.0391	NA	NA	NA	NA	NA	360	0.0782041	0.890778	0.0519977	0.0232201	A0A0J9YWB6;Q9Y5B0;K7EPW4;A0A0J9YWJ4;K7EJD2;A0A0A0MR03	A0A0J9YWB6;Q9Y5B0;K7EPW4;A0A0J9YWJ4;K7EJD2;A0A0A0MR03	RNA polymerase II subunit A C-terminal domain phosphatase	CTDP1	>tr|A0A0J9YWB6|A0A0J9YWB6_HUMAN RNA polymerase II subunit A C-terminal domain phosphatase (Fragment) OS=Homo sapiens GN=CTDP1 PE=1 SV=1;>sp|Q9Y5B0|CTDP1_HUMAN RNA polymerase II subunit A C-terminal domain phosphatase OS=Homo sapiens GN=CTDP1 PE=1 SV=3;>tr|	ENSG00000060069	ENSP00000075430;ENSP00000299543;ENSP00000465119;ENSP00000467563	CTDP1_HUMAN;K7EJD2_HUMAN;K7EPW4_HUMAN	Not Sig	logFC < 2.0	UNCERTAIN
327	26.1189	25.7619	25.7461	25.9367	25.44	25.0076	25.4497	25.0562	NA	NA	NA	NA	NA	364	2.34218	0.179832	-0.652522	-0.303759	A0A0J9YYG4;A0A0J9YXF2;Q15165;J3QT77;G3XAK4;A0A0J9YXU7;A0A0J9YYJ1;A0A0J9YYF0;A0A0J9YYF3;A0A0J9YXM1	A0A0J9YYG4;A0A0J9YXF2;Q15165;J3QT77;G3XAK4	Serum paraoxonase/arylesterase 2	PON2	>tr|A0A0J9YYG4|A0A0J9YYG4_HUMAN Serum paraoxonase/arylesterase 2 OS=Homo sapiens GN=PON2 PE=1 SV=1;>tr|A0A0J9YXF2|A0A0J9YXF2_HUMAN Paraoxonase 2, isoform CRA_a OS=Homo sapiens GN=PON2 PE=1 SV=1;>sp|Q15165|PON2_HUMAN Serum paraoxonase/arylesterase 2 OS=Homo	ENSG00000105854	ENSP00000222572;ENSP00000404622;ENSP00000405211;ENSP00000414515	G3XAK4_HUMAN;J3QT77_HUMAN;PON2_HUMAN	Not Sig	logFC < 2.0	UNCERTAIN
328	22.4915	23.0269	22.5915	22.7654	22.5809	22.9496	23.009	23.4416	NA	NA	NA	NA	NA	367	0.620542	0.482089	0.276446	0.124988	A0A0M3HER2	A0A0M3HER2	NA	NA	>tr|A0A0M3HER2|A0A0M3HER2_HUMAN Centromere protein V OS=Homo sapiens GN=CENPV PE=1 SV=1	NA	NA	NA	Not Sig	logFC < 2.0	UNCERTAIN
329	23.0787	23.3749	22.7807	20.7551	20.965	23.1204	22.1409	23.8484	NA	NA	NA	NA	NA	368	0.00830864	0.977623	0.0213351	0.00745532	A0A0R4J2E5;P49459;A0A0D9SG71;A0A0D9SEZ6;H0Y9V2;P63146	A0A0R4J2E5;P49459;A0A0D9SG71;A0A0D9SEZ6;H0Y9V2;P63146	Ubiquitin-conjugating enzyme E2 A;Ubiquitin-conjugating enzyme E2 B	UBE2A;UBE2B	>tr|A0A0R4J2E5|A0A0R4J2E5_HUMAN Ubiquitin-conjugating enzyme E2 A OS=Homo sapiens GN=UBE2A PE=1 SV=1;>sp|P49459|UBE2A_HUMAN Ubiquitin-conjugating enzyme E2 A OS=Homo sapiens GN=UBE2A PE=1 SV=2;>tr|A0A0D9SG71|A0A0D9SG71_HUMAN Ubiquitin-conjugating enzyme E2	ENSG00000077721;ENSG00000119048	ENSP00000265339;ENSP00000335027;ENSP00000360613;ENSP00000360624;ENSP00000425137	H0Y9V2_HUMAN;UBE2A_HUMAN;UBE2B_HUMAN	Not Sig	logFC < 2.0	UNCERTAIN
330	30.0196	30.0379	29.9891	30.0931	29.8648	29.9971	30.1001	30.337	NA	NA	NA	NA	NA	369	0.148698	0.914948	0.0398388	0.0189512	A0A0R4J2E8;P43243;D6REM6;D6R991;B3KM87;H0Y8T4;D6R8Z5;D6RBK5;D6RCM3;D6REK4;D6RBI2;D6RE02;D6RIA2;D6RB45;D6R9F3;D6RAM9;D6RAY2;D6RBS2	A0A0R4J2E8;P43243;D6REM6;D6R991	Matrin-3	MATR3	>tr|A0A0R4J2E8|A0A0R4J2E8_HUMAN Matrin-3 OS=Homo sapiens GN=MATR3 PE=4 SV=1;>sp|P43243|MATR3_HUMAN Matrin-3 OS=Homo sapiens GN=MATR3 PE=1 SV=2;>tr|D6REM6|D6REM6_HUMAN Matrin-3 OS=Homo sapiens GN=MATR3 PE=1 SV=1;>tr|D6R991|D6R991_HUMAN Matrin-3 (Fragment) O	ENSG00000015479	ENSP00000354346;ENSP00000378284;ENSP00000423290;ENSP00000423533;ENSP00000423587;ENSP00000426743	D6R991_HUMAN;D6REM6_HUMAN;MATR3_HUMAN	Not Sig	logFC < 2.0	UNCERTAIN
331	24.6761	24.6641	24.909	24.3906	25.2831	24.7427	24.6257	24.6435	NA	NA	NA	NA	NA	371	0.379681	0.65604	0.163783	0.0748545	A0A0U1RQK7;A0A0A0MSA7;O43432	A0A0U1RQK7;A0A0A0MSA7;O43432	Eukaryotic translation initiation factor 4 gamma 3	EIF4G3	>tr|A0A0U1RQK7|A0A0U1RQK7_HUMAN Eukaryotic translation initiation factor 4 gamma 3 OS=Homo sapiens GN=EIF4G3 PE=4 SV=1;>tr|A0A0A0MSA7|A0A0A0MSA7_HUMAN Eukaryotic translation initiation factor 4 gamma 3 OS=Homo sapiens GN=EIF4G3 PE=1 SV=1;>sp|O43432|IF4G3_H	ENSG00000075151	ENSP00000264211;ENSP00000364073;ENSP00000383274	IF4G3_HUMAN	Not Sig	logFC < 2.0	UNCERTAIN
332	23.8138	24.0648	23.5774	23.7269	23.3062	24.0714	23.9959	24.0384	NA	NA	NA	NA	NA	373	0.10028	0.876027	0.0572453	0.0259088	A0A0U1RQL9;A0A0U1RQS5;B3KNS4;A0A0U1RQV1;Q96A10;A0A0U1RQN3	A0A0U1RQL9;A0A0U1RQS5;B3KNS4;A0A0U1RQV1;Q96A10;A0A0U1RQN3	NA	hCG_2043597	>tr|A0A0U1RQL9|A0A0U1RQL9_HUMAN Protein ERVK3-1 (Fragment) OS=Homo sapiens GN=ERVK3-1 PE=4 SV=1;>tr|A0A0U1RQS5|A0A0U1RQS5_HUMAN Protein ERVK3-1 (Fragment) OS=Homo sapiens GN=ERVK3-1 PE=4 SV=1;>tr|B3KNS4|B3KNS4_HUMAN HCG2043597, isoform CRA_a OS=Homo sapien	NA	NA	B3KNS4_HUMAN;Q96A10_HUMAN	Not Sig	logFC < 2.0	UNCERTAIN
333	22.193	22.1501	21.4617	22.2892	21.8699	21.5154	22.0061	22.2029	NA	NA	NA	NA	NA	374	0.208159	0.73347	-0.124938	-0.0558124	A0A0U1RQT8;Q8TCZ2	A0A0U1RQT8;Q8TCZ2	CD99 antigen-like protein 2	CD99L2	>tr|A0A0U1RQT8|A0A0U1RQT8_HUMAN CD99 antigen-like protein 2 (Fragment) OS=Homo sapiens GN=CD99L2 PE=4 SV=1;>sp|Q8TCZ2|C99L2_HUMAN CD99 antigen-like protein 2 OS=Homo sapiens GN=CD99L2 PE=1 SV=1	ENSG00000102181;ENSG00000269478	ENSP00000325449;ENSP00000347275;ENSP00000359403;ENSP00000394858;ENSP00000417697;ENSP00000468852;ENSP00000469207;ENSP00000470640;ENSP00000471532;ENSP00000473060	C99L2_HUMAN	Not Sig	logFC < 2.0	UNCERTAIN
334	22.9255	23.0208	23.3551	22.7248	23.6017	22.9161	22.8775	22.6416	NA	NA	NA	NA	NA	378	0.00363604	0.995876	0.0026679	0.00118841	A0A0U1RRB6;Q9Y2D4;J3QT38	A0A0U1RRB6;Q9Y2D4;J3QT38	Exocyst complex component 6B	EXOC6B	>tr|A0A0U1RRB6|A0A0U1RRB6_HUMAN Exocyst complex component 6B OS=Homo sapiens GN=EXOC6B PE=4 SV=1;>sp|Q9Y2D4|EXC6B_HUMAN Exocyst complex component 6B OS=Homo sapiens GN=EXOC6B PE=1 SV=3;>tr|J3QT38|J3QT38_HUMAN Exocyst complex component 6B OS=Homo sapiens GN	ENSG00000144036	ENSP00000272427;ENSP00000386698	EXC6B_HUMAN;J3QT38_HUMAN	Not Sig	logFC < 2.0	UNCERTAIN
335	24.6543	24.7278	25.0033	24.7301	24.154	24.4493	24.6816	24.8121	NA	NA	NA	NA	NA	380	0.76771	0.501167	-0.254564	-0.117657	A0A0U1RRM1;Q8WXI9;A0A0U1RR30;A0A0U1RRK3;A0A0U1RR34	A0A0U1RRM1;Q8WXI9;A0A0U1RR30	Transcriptional repressor p66-beta	GATAD2B	>tr|A0A0U1RRM1|A0A0U1RRM1_HUMAN Transcriptional repressor p66-beta OS=Homo sapiens GN=GATAD2B PE=4 SV=1;>sp|Q8WXI9|P66B_HUMAN Transcriptional repressor p66-beta OS=Homo sapiens GN=GATAD2B PE=1 SV=1;>tr|A0A0U1RR30|A0A0U1RR30_HUMAN Transcriptional repressor	ENSG00000143614;ENSG00000261992	ENSP00000357644;ENSP00000458280	P66B_HUMAN	Not Sig	logFC < 2.0	UNCERTAIN
336	29.8805	29.7348	29.5409	29.8137	30.0014	30.078	30.0803	30.1783	NA	NA	NA	NA	NA	381	2.23248	0.388145	0.342048	0.164292	A0A0U1RRM4;P26599;A6NLN1;A0A0D9SF20;K7EKJ7;K7EK45;K7ES59;A0A087WUW5;K7ELW5;A0A087WU68;K7EKX4;X6R242	A0A0U1RRM4;P26599;A6NLN1	Polypyrimidine tract-binding protein 1	PTBP1	>tr|A0A0U1RRM4|A0A0U1RRM4_HUMAN Polypyrimidine tract-binding protein 1 OS=Homo sapiens GN=PTBP1 PE=4 SV=1;>sp|P26599|PTBP1_HUMAN Polypyrimidine tract-binding protein 1 OS=Homo sapiens GN=PTBP1 PE=1 SV=1;>tr|A6NLN1|A6NLN1_HUMAN Polypyrimidine tract binding	ENSG00000011304	ENSP00000014112;ENSP00000342332;ENSP00000349428;ENSP00000408096	A6NLN1_HUMAN;PTBP1_HUMAN	Not Sig	logFC < 2.0	UNCERTAIN
337	26.1982	26.1688	26.3911	26.1148	26.3043	26.1783	26.2466	26.266	NA	NA	NA	NA	NA	382	0.181743	0.935325	0.0305724	0.0148001	A0AVT1;H0Y8S8;H0Y9U5	A0AVT1	Ubiquitin-like modifier-activating enzyme 6	UBA6	>sp|A0AVT1|UBA6_HUMAN Ubiquitin-like modifier-activating enzyme 6 OS=Homo sapiens GN=UBA6 PE=1 SV=1	ENSG00000033178	ENSP00000313454;ENSP00000399234	UBA6_HUMAN	Not Sig	logFC < 2.0	UNCERTAIN
338	23.0143	23.0833	22.6447	23.0388	23.7789	23.5676	23.4276	24.1261	NA	NA	NA	NA	NA	385	2.27935	0.125822	0.779761	0.357269	A0JP02;B4DJX4;Q9HAU0;H0YGJ6	A0JP02;B4DJX4;Q9HAU0;H0YGJ6	Pleckstrin homology domain-containing family A member 5	PLEKHA5	>tr|A0JP02|A0JP02_HUMAN PLEKHA5 protein OS=Homo sapiens GN=PLEKHA5 PE=1 SV=1;>tr|B4DJX4|B4DJX4_HUMAN Pleckstrin homology domain-containing family A member 5 (Fragment) OS=Homo sapiens GN=PLEKHA5 PE=1 SV=1;>sp|Q9HAU0|PKHA5_HUMAN Pleckstrin homology domain-c	ENSG00000052126	ENSP00000299275;ENSP00000311239;ENSP00000325155;ENSP00000347560;ENSP00000352104;ENSP00000404296;ENSP00000439673;ENSP00000440371;ENSP00000440611;ENSP00000443553	A0JP02_HUMAN;B4DJX4_HUMAN;H0YGJ6_HUMAN;PKHA5_HUMAN	Not Sig	logFC < 2.0	UNCERTAIN
339	21.8561	20.4524	20.483	20.858	22.1753	22.2827	21.5531	21.6399	NA	NA	NA	NA	NA	387	1.42489	0.0772024	1.00039	0.42099	A0MZ66	A0MZ66	Shootin-1	KIAA1598	>sp|A0MZ66|SHOT1_HUMAN Shootin-1 OS=Homo sapiens GN=SHTN1 PE=1 SV=4	ENSG00000187164	ENSP00000260777;ENSP00000347532;ENSP00000376635;ENSP00000376636	SHOT1_HUMAN	Not Sig	logFC < 2.0	UNCERTAIN
340	23.0703	23.1508	23.2355	22.916	22.8418	23.2042	23.2891	23.5236	NA	NA	NA	NA	NA	389	0.329591	0.732438	0.121535	0.0563454	A1L020;M9T4I7	A1L020	RNA-binding protein MEX3A	MEX3A	>sp|A1L020|MEX3A_HUMAN RNA-binding protein MEX3A OS=Homo sapiens GN=MEX3A PE=1 SV=1	ENSG00000254726	ENSP00000432845	MEX3A_HUMAN	Not Sig	logFC < 2.0	UNCERTAIN
341	25.3787	25.3472	25.3347	25.1813	25.7069	25.6094	25.3292	25.4847	NA	NA	NA	NA	NA	390	1.27013	0.539521	0.222066	0.106113	M0R026;A1L0T0;M0R1B5;M0QZX5;E9PJS0;E9PL44	M0R026;A1L0T0	Acetolactate synthase-like protein	ILVBL	>tr|M0R026|M0R026_HUMAN Acetolactate synthase-like protein OS=Homo sapiens GN=ILVBL PE=1 SV=1;>sp|A1L0T0|ILVBL_HUMAN Acetolactate synthase-like protein OS=Homo sapiens GN=ILVBL PE=1 SV=2	ENSG00000105135	ENSP00000263383;ENSP00000470942	ILVBL_HUMAN;M0R026_HUMAN	Not Sig	logFC < 2.0	UNCERTAIN
342	25.8412	25.9119	25.9861	25.9234	26.5503	26.0375	26.0572	26.0818	NA	NA	NA	NA	NA	392	1.09386	0.481981	0.266022	0.125085	A1X283;G3V144;H0YAU1	A1X283	SH3 and PX domain-containing protein 2B	SH3PXD2B	>sp|A1X283|SPD2B_HUMAN SH3 and PX domain-containing protein 2B OS=Homo sapiens GN=SH3PXD2B PE=1 SV=3	ENSG00000174705	ENSP00000309714	SPD2B_HUMAN	Not Sig	logFC < 2.0	UNCERTAIN
343	23.8195	24.1151	24.1607	23.6705	24.6033	24.1937	24.1359	23.7978	NA	NA	NA	NA	NA	393	0.55385	0.527928	0.241206	0.109497	A2A2Q9;Q9Y312	A2A2Q9;Q9Y312	Protein AAR2 homolog	AAR2	>tr|A2A2Q9|A2A2Q9_HUMAN Protein AAR2 homolog OS=Homo sapiens GN=AAR2 PE=1 SV=1;>sp|Q9Y312|AAR2_HUMAN Protein AAR2 homolog OS=Homo sapiens GN=AAR2 PE=1 SV=2	ENSG00000131043	ENSP00000313674;ENSP00000363043;ENSP00000380455	A2A2Q9_HUMAN;AAR2_HUMAN	Not Sig	logFC < 2.0	UNCERTAIN
344	21.4276	21.4311	20.4904	20.7334	22.1869	22.0527	21.8383	22.0317	NA	NA	NA	NA	NA	395	2.14841	0.0637908	1.0068	0.447149	A2IDA3;P29372	A2IDA3;P29372	DNA-3-methyladenine glycosylase	MPG	>tr|A2IDA3|A2IDA3_HUMAN DNA-3-methyladenine glycosylase (Fragment) OS=Homo sapiens GN=MPG PE=1 SV=1;>sp|P29372|3MG_HUMAN DNA-3-methyladenine glycosylase OS=Homo sapiens GN=MPG PE=1 SV=3	ENSG00000103152	ENSP00000219431;ENSP00000388097	3MG_HUMAN;A2IDA3_HUMAN	Not Sig	logFC < 2.0	UNCERTAIN
345	22.6444	22.8962	23.0482	22.5242	23.1291	22.4506	21.9414	20.6849	NA	NA	NA	NA	NA	396	0.658975	0.198817	-0.726746	-0.287264	H0Y5G7;A2RRP1;H7BZU5;C9JCM7	H0Y5G7;A2RRP1	Neuroblastoma-amplified sequence	NBAS	>tr|H0Y5G7|H0Y5G7_HUMAN Neuroblastoma-amplified sequence (Fragment) OS=Homo sapiens GN=NBAS PE=1 SV=1;>sp|A2RRP1|NBAS_HUMAN Neuroblastoma-amplified sequence OS=Homo sapiens GN=NBAS PE=1 SV=2	ENSG00000151779	ENSP00000281513;ENSP00000398411;ENSP00000413201	H0Y5G7_HUMAN;NBAS_HUMAN	Not Sig	logFC < 2.0	UNCERTAIN
346	25.0274	24.8225	24.8875	25.0227	25.0862	25.0636	24.9866	25.2333	NA	NA	NA	NA	NA	397	1.09716	0.657916	0.152432	0.0735527	B7ZM87;A2RUF3;O75044;A0A075B7B5;Q5VZB4;P0DJJ0;A0A075B7E9;P0DMP2;A0A075B743;A0A075B7E6;G5EA48;Q7Z6B7;A0A075B7C8;E9PDX4;A0A087X0L1;A0A087WW56	B7ZM87;A2RUF3;O75044;A0A075B7B5	SLIT-ROBO Rho GTPase-activating protein 2	SRGAP2	>tr|B7ZM87|B7ZM87_HUMAN SLIT-ROBO Rho GTPase-activating protein 2 OS=Homo sapiens GN=SRGAP2 PE=1 SV=1;>tr|A2RUF3|A2RUF3_HUMAN SLIT-ROBO Rho GTPase activating protein 2 OS=Homo sapiens GN=SRGAP2 PE=1 SV=1;>sp|O75044|SRGP2_HUMAN SLIT-ROBO Rho GTPase-activati	ENSG00000163486	ENSP00000408089	A2RUF3_HUMAN;B7ZM87_HUMAN;SRGP2_HUMAN	Not Sig	logFC < 2.0	UNCERTAIN
347	21.9548	20.1961	21.8885	20.3229	22.8763	22.1433	22.035	21.0823	NA	NA	NA	NA	NA	399	0.769129	0.121675	0.943645	0.362168	A3KN83	A3KN83	Protein strawberry notch homolog 1	SBNO1	>sp|A3KN83|SBNO1_HUMAN Protein strawberry notch homolog 1 OS=Homo sapiens GN=SBNO1 PE=1 SV=1	ENSG00000139697	ENSP00000267176;ENSP00000387361	SBNO1_HUMAN	Not Sig	logFC < 2.0	UNCERTAIN
348	22.0838	21.9829	21.7803	22.1965	21.0264	21.8295	21.4063	22.1241	NA	NA	NA	NA	NA	402	0.804208	0.350271	-0.414299	-0.183628	F5H4Q5;A5D8V6	F5H4Q5;A5D8V6	Vacuolar protein sorting-associated protein 37C	VPS37C	>tr|F5H4Q5|F5H4Q5_HUMAN Vacuolar protein sorting-associated protein 37C (Fragment) OS=Homo sapiens GN=VPS37C PE=1 SV=1;>sp|A5D8V6|VP37C_HUMAN Vacuolar protein sorting-associated protein 37C OS=Homo sapiens GN=VPS37C PE=1 SV=2	ENSG00000167987	ENSP00000301765;ENSP00000446013	F5H4Q5_HUMAN;VP37C_HUMAN	Not Sig	logFC < 2.0	UNCERTAIN
349	26.3666	26.4897	26.9513	26.1429	26.7869	26.3234	26.2563	25.8269	NA	NA	NA	NA	NA	403	0.305999	0.621699	-0.189229	-0.0837256	A5YKK6;H3BVC9;H3BMZ2;B5MDN3;H3BNB1;H3BR89;H3BMH0;H3BT18;H3BU44;A0A0U1RVI1;H3BPF1;H3BTH2	A5YKK6	CCR4-NOT transcription complex subunit 1	CNOT1	>sp|A5YKK6|CNOT1_HUMAN CCR4-NOT transcription complex subunit 1 OS=Homo sapiens GN=CNOT1 PE=1 SV=2	ENSG00000125107	ENSP00000320949;ENSP00000413113;ENSP00000455635;ENSP00000456649	CNOT1_HUMAN	Not Sig	logFC < 2.0	UNCERTAIN
350	24.5425	24.8413	24.5255	24.6347	24.327	24.3387	24.3514	24.8289	NA	NA	NA	NA	NA	404	0.574495	0.630483	-0.174502	-0.0814511	H3BTL1;Q9GZQ8;A6NCE7;Q9H492	H3BTL1;Q9GZQ8;A6NCE7;Q9H492	Microtubule-associated proteins 1A/1B light chain 3B;Microtubule-associated proteins 1A/1B light chain 3 beta 2;Microtubule-associated proteins 1A/1B light chain 3A	MAP1LC3B;MAP1LC3B2;MAP1LC3A	>tr|H3BTL1|H3BTL1_HUMAN Microtubule-associated protein 1 light chain 3 beta, isoform CRA_f OS=Homo sapiens GN=MAP1LC3B PE=3 SV=1;>sp|Q9GZQ8|MLP3B_HUMAN Microtubule-associated proteins 1A/1B light chain 3B OS=Homo sapiens GN=MAP1LC3B PE=1 SV=3;>sp|A6NCE7|MP	ENSG00000101460;ENSG00000140941;ENSG00000171471	ENSP00000268607;ENSP00000305059;ENSP00000353886;ENSP00000363970;ENSP00000380821;ENSP00000450524;ENSP00000457225	H3BTL1_HUMAN;MLP3A_HUMAN;MLP3B_HUMAN;MP3B2_HUMAN	Not Sig	logFC < 2.0	UNCERTAIN
351	22.3935	22.4417	22.6577	22.4968	19.9908	22.4073	22.9717	23.0065	NA	NA	NA	NA	NA	405	0.226228	0.417918	-0.403351	-0.14847	A6ND22;Q9Y3D3	A6ND22;Q9Y3D3	28S ribosomal protein S16, mitochondrial	MRPS16	>tr|A6ND22|A6ND22_HUMAN 28S ribosomal protein S16, mitochondrial OS=Homo sapiens GN=MRPS16 PE=1 SV=1;>sp|Q9Y3D3|RT16_HUMAN 28S ribosomal protein S16, mitochondrial OS=Homo sapiens GN=MRPS16 PE=1 SV=1	ENSG00000182180	ENSP00000362031;ENSP00000362036	A6ND22_HUMAN;RT16_HUMAN	Not Sig	logFC < 2.0	UNCERTAIN
352	25.3762	25.3981	24.8755	25.3987	25.258	25.2576	25.0371	25.5227	NA	NA	NA	NA	NA	407	0.0138637	0.989843	0.00668478	0.00309078	A6NDG6;H3BV17	A6NDG6	Phosphoglycolate phosphatase	PGP	>sp|A6NDG6|PGP_HUMAN Phosphoglycolate phosphatase OS=Homo sapiens GN=PGP PE=1 SV=1	ENSG00000184207	ENSP00000330918;ENSP00000457459	PGP_HUMAN	Not Sig	logFC < 2.0	UNCERTAIN
353	25.5333	24.4684	21.9863	25.1233	23.4624	25.9089	25.2253	26.2331	NA	NA	NA	NA	NA	408	0.407215	0.177221	0.929569	0.309138	A6NEL0;P05114;A6NL93;F2Z2W6;F2Z2Y5;H7BXJ5	A6NEL0;P05114;A6NL93	Non-histone chromosomal protein HMG-14	HMGN1	>tr|A6NEL0|A6NEL0_HUMAN Non-histone chromosomal protein HMG-14 OS=Homo sapiens GN=HMGN1 PE=1 SV=1;>sp|P05114|HMGN1_HUMAN Non-histone chromosomal protein HMG-14 OS=Homo sapiens GN=HMGN1 PE=1 SV=3;>tr|A6NL93|A6NL93_HUMAN Non-histone chromosomal protein HMG-1	ENSG00000205581	ENSP00000370123;ENSP00000370124;ENSP00000370125	A6NEL0_HUMAN;A6NL93_HUMAN;HMGN1_HUMAN	Not Sig	logFC < 2.0	UNCERTAIN
354	25.6886	25.5445	25.3791	25.9102	25.7034	25.817	25.8789	26.1727	NA	NA	NA	NA	NA	411	0.878802	0.488896	0.262409	0.122013	A6NFX8;Q9UKK9;A6NJU6;A6NCQ0;H0YEY4;C9JYY9	A6NFX8;Q9UKK9;A6NJU6;A6NCQ0	ADP-sugar pyrophosphatase	NUDT5	>tr|A6NFX8|A6NFX8_HUMAN ADP-sugar pyrophosphatase OS=Homo sapiens GN=NUDT5 PE=1 SV=1;>sp|Q9UKK9|NUDT5_HUMAN ADP-sugar pyrophosphatase OS=Homo sapiens GN=NUDT5 PE=1 SV=1;>tr|A6NJU6|A6NJU6_HUMAN ADP-sugar pyrophosphatase OS=Homo sapiens GN=NUDT5 PE=1 SV=2;>t	ENSG00000165609	ENSP00000368209;ENSP00000368219;ENSP00000368222;ENSP00000419628;ENSP00000445116	A6NCQ0_HUMAN;A6NFX8_HUMAN;A6NJU6_HUMAN;NUDT5_HUMAN	Not Sig	logFC < 2.0	UNCERTAIN
355	20.7602	22.095	21.8122	21.2653	22.3019	21.8429	22.0394	20.8164	NA	NA	NA	NA	NA	412	0.247131	0.52798	0.266993	0.109431	K7EIJ0;K7ENL2;A6NG10;K7EMC9;Q969T9;K7EIN1;K7ESN4;K7EIK1;B4DFG2	K7EIJ0;K7ENL2;A6NG10;K7EMC9;Q969T9;K7EIN1;K7ESN4;K7EIK1;B4DFG2	WW domain-binding protein 2	WBP2	>tr|K7EIJ0|K7EIJ0_HUMAN WW domain-binding protein 2 (Fragment) OS=Homo sapiens GN=WBP2 PE=1 SV=1;>tr|K7ENL2|K7ENL2_HUMAN WW domain-binding protein 2 OS=Homo sapiens GN=WBP2 PE=1 SV=1;>tr|A6NG10|A6NG10_HUMAN WW domain-binding protein 2 OS=Homo sapiens GN=WB	ENSG00000132471	ENSP00000254806;ENSP00000341570;ENSP00000415251;ENSP00000464768;ENSP00000464782;ENSP00000464820;ENSP00000466450;ENSP00000466999;ENSP00000467579;ENSP00000467583;ENSP00000468793	A6NG10_HUMAN;B4DFG2_HUMAN;K7EIJ0_HUMAN;K7EIK1_HUMAN;K7EIN1_HUMAN;K7EMC9_HUMAN;K7ENL2_HUMAN;K7ESN4_HUMAN;WBP2_HUMAN	Not Sig	logFC < 2.0	UNCERTAIN
356	24.932	24.9619	25.291	24.8226	25.5987	25.0614	25.1084	25.0287	NA	NA	NA	NA	NA	416	0.54665	0.595567	0.19746	0.091085	A6NHN7;A6NHB5;Q14202;A6NL54	A6NHN7;A6NHB5;Q14202	Zinc finger MYM-type protein 3	ZMYM3	>tr|A6NHN7|A6NHN7_HUMAN Zinc finger MYM-type protein 3 OS=Homo sapiens GN=ZMYM3 PE=1 SV=1;>tr|A6NHB5|A6NHB5_HUMAN Zinc finger MYM-type protein 3 OS=Homo sapiens GN=ZMYM3 PE=1 SV=1;>sp|Q14202|ZMYM3_HUMAN Zinc finger MYM-type protein 3 OS=Homo sapiens GN=ZMY	ENSG00000147130	ENSP00000322845;ENSP00000343909;ENSP00000363093;ENSP00000363096;ENSP00000363100;ENSP00000363110	A6NHB5_HUMAN;A6NHN7_HUMAN;ZMYM3_HUMAN	Not Sig	logFC < 2.0	UNCERTAIN
357	26.3037	26.4508	26.5958	26.1648	26.6067	26.4501	26.346	26.1245	NA	NA	NA	NA	NA	418	0.00753559	0.995837	0.00308704	0.00144433	A6NHR9;J3KTL8;J3QSH1;J3KRK8	A6NHR9;J3KTL8	Structural maintenance of chromosomes flexible hinge domain-containing protein 1	SMCHD1	>sp|A6NHR9|SMHD1_HUMAN Structural maintenance of chromosomes flexible hinge domain-containing protein 1 OS=Homo sapiens GN=SMCHD1 PE=1 SV=2;>tr|J3KTL8|J3KTL8_HUMAN Structural maintenance of chromosomes flexible hinge domain-containing protein 1 (Fragment)	ENSG00000101596	ENSP00000261598;ENSP00000326603;ENSP00000463049	J3KTL8_HUMAN;SMHD1_HUMAN	Not Sig	logFC < 2.0	UNCERTAIN
358	24.4504	23.9593	23.6202	24.5331	23.4441	24.0152	23.8172	24.2018	NA	NA	NA	NA	NA	419	0.452785	0.496904	-0.271165	-0.119502	A6NIH7;K7EJU3;K7EN86;C9JSK0	A6NIH7	Protein unc-119 homolog B	UNC119B	>sp|A6NIH7|U119B_HUMAN Protein unc-119 homolog B OS=Homo sapiens GN=UNC119B PE=1 SV=1	ENSG00000175970	ENSP00000344942;ENSP00000438905	U119B_HUMAN	Not Sig	logFC < 2.0	UNCERTAIN
359	21.1078	20.8855	21.1703	21.0865	22.2491	21.3135	21.085	21.5847	NA	NA	NA	NA	NA	422	0.980205	0.286191	0.495507	0.21931	F8WC89;A6NKF1	F8WC89;A6NKF1	SAC3 domain-containing protein 1	SAC3D1	>tr|F8WC89|F8WC89_HUMAN SAC3 domain-containing protein 1 OS=Homo sapiens GN=SAC3D1 PE=1 SV=1;>sp|A6NKF1|SAC31_HUMAN SAC3 domain-containing protein 1 OS=Homo sapiens GN=SAC3D1 PE=1 SV=2	ENSG00000168061	ENSP00000381824;ENSP00000436649	F8WC89_HUMAN;SAC31_HUMAN	Not Sig	logFC < 2.0	UNCERTAIN
360	22.1608	22.0985	22.1061	22.0933	23.7969	22.9558	23.8019	23.4046	NA	NA	NA	NA	NA	424	3.31381	0.0216196	1.37514	0.624645	A6NMH6;Q92599;A0A087X142;A6NFQ9;F8W8I8;C9JV02;A0A0A0MRP8;C9J4G8	A6NMH6;Q92599;A0A087X142;A6NFQ9;F8W8I8	Septin-8	2016-09-08	>tr|A6NMH6|A6NMH6_HUMAN Septin-8 OS=Homo sapiens GN=SEPT8 PE=1 SV=1;>sp|Q92599|SEPT8_HUMAN Septin-8 OS=Homo sapiens GN=SEPT8 PE=1 SV=4;>tr|A0A087X142|A0A087X142_HUMAN Septin-8 OS=Homo sapiens GN=SEPT8 PE=1 SV=1;>tr|A6NFQ9|A6NFQ9_HUMAN Septin-8 OS=Homo sapi	ENSG00000164402	ENSP00000296873;ENSP00000367971;ENSP00000367973;ENSP00000367978;ENSP00000367991;ENSP00000367993;ENSP00000399840	A6NFQ9_HUMAN;A6NMH6_HUMAN;F8W8I8_HUMAN;SEPT8_HUMAN	Not Sig	logFC < 2.0	UNCERTAIN
361	23.9702	23.1103	22.8309	23.2893	23.5639	23.1952	23.0958	23.137	NA	NA	NA	NA	NA	425	0.0703242	0.892045	-0.052166	-0.0230302	E9PJK1;E9PRJ8;H0YDL9;H0YDJ9;E9PIF1;A6NMH8;P60033;E9PM31;H0YEE2	E9PJK1;E9PRJ8;H0YDL9;H0YDJ9;E9PIF1;A6NMH8;P60033	CD81 antigen	CD81	>tr|E9PJK1|E9PJK1_HUMAN Tetraspanin OS=Homo sapiens GN=CD81 PE=1 SV=1;>tr|E9PRJ8|E9PRJ8_HUMAN Tetraspanin (Fragment) OS=Homo sapiens GN=CD81 PE=1 SV=1;>tr|H0YDL9|H0YDL9_HUMAN Tetraspanin (Fragment) OS=Homo sapiens GN=CD81 PE=1 SV=1;>tr|H0YDJ9|H0YDJ9_HUMAN	ENSG00000110651	ENSP00000263645;ENSP00000370424;ENSP00000431780;ENSP00000432033;ENSP00000432249;ENSP00000433767;ENSP00000433904;ENSP00000437242	A6NMH8_HUMAN;CD81_HUMAN;E9PIF1_HUMAN;E9PJK1_HUMAN;E9PRJ8_HUMAN;H0YDJ9_HUMAN;H0YDL9_HUMAN	Not Sig	logFC < 2.0	UNCERTAIN
362	24.5745	24.6087	24.3047	24.9222	23.5005	24.3218	24.4964	24.6345	NA	NA	NA	NA	NA	426	0.607885	0.396221	-0.364269	-0.1595	A6NMQ3;Q5T5H1;O43768	A6NMQ3;Q5T5H1;O43768	Alpha-endosulfine	ENSA	>tr|A6NMQ3|A6NMQ3_HUMAN Alpha-endosulfine OS=Homo sapiens GN=ENSA PE=1 SV=2;>tr|Q5T5H1|Q5T5H1_HUMAN Alpha-endosulfine OS=Homo sapiens GN=ENSA PE=1 SV=1;>sp|O43768|ENSA_HUMAN Alpha-endosulfine OS=Homo sapiens GN=ENSA PE=1 SV=1	ENSG00000143420	ENSP00000271690;ENSP00000341743;ENSP00000348921;ENSP00000354835;ENSP00000355220;ENSP00000355239;ENSP00000358010;ENSP00000358012;ENSP00000421458;ENSP00000422343;ENSP00000424242;ENSP00000426110	A6NMQ3_HUMAN;ENSA_HUMAN;Q5T5H1_HUMAN	Not Sig	logFC < 2.0	UNCERTAIN
363	25.8835	25.9093	25.8568	25.7312	26.0071	25.5976	25.6234	25.6451	NA	NA	NA	NA	NA	428	0.568275	0.712727	-0.126906	-0.0603023	A6PVH9;F2Z2V0;Q99829;E7ENH5;B0QZ18;Q5JX56;Q5JX58;Q5JX59;Q5JX60;Q5JX44;Q5JX45;Q5JX54;Q5JX55;Q5JX61;Q5JX52;Q5JX57;E7EV27;Q5JX53;H0Y524	A6PVH9;F2Z2V0;Q99829;E7ENH5;B0QZ18;Q5JX56;Q5JX58;Q5JX59;Q5JX60;Q5JX44;Q5JX45;Q5JX54;Q5JX55;Q5JX61;Q5JX52	Copine-1	CPNE1	>tr|A6PVH9|A6PVH9_HUMAN Copine-1 OS=Homo sapiens GN=CPNE1 PE=1 SV=1;>tr|F2Z2V0|F2Z2V0_HUMAN Copine-1 (Fragment) OS=Homo sapiens GN=CPNE1 PE=1 SV=1;>sp|Q99829|CPNE1_HUMAN Copine-1 OS=Homo sapiens GN=CPNE1 PE=1 SV=1;>tr|E7ENH5|E7ENH5_HUMAN Copine-1 OS=Homo s	ENSG00000214078	ENSP00000317257;ENSP00000326126;ENSP00000336945;ENSP00000380584;ENSP00000380585;ENSP00000380587;ENSP00000380588;ENSP00000386067;ENSP00000387434;ENSP00000389662;ENSP00000390626;ENSP00000391483;ENSP00000397638;ENSP00000401915;ENSP00000404355;ENSP00000409794;ENSP00000409955;ENSP00000415597;ENSP00000416962	A6PVH9_HUMAN;B0QZ18_HUMAN;CPNE1_HUMAN;E7ENH5_HUMAN;F2Z2V0_HUMAN;Q5JX44_HUMAN;Q5JX45_HUMAN;Q5JX52_HUMAN;Q5JX54_HUMAN;Q5JX55_HUMAN;Q5JX56_HUMAN;Q5JX58_HUMAN;Q5JX59_HUMAN;Q5JX60_HUMAN;Q5JX61_HUMAN	Not Sig	logFC < 2.0	UNCERTAIN
364	25.7794	25.687	25.7215	25.5737	25.9236	25.5814	25.7669	25.5812	NA	NA	NA	NA	NA	430	0.0891449	0.958633	0.0228853	0.0109326	A6PVN5;Q15257;F6WIT2;A6PVN9;Q68CR8;Q5T949;Q5T948;A6PVN6;B7ZBQ0;A6PVN8;C9IZ76;A6PVN7;H0Y6E5;B7ZBP9;B7ZBP7;B4DDQ6;H0Y562	A6PVN5;Q15257;F6WIT2;A6PVN9;Q68CR8;Q5T949;Q5T948	Serine/threonine-protein phosphatase 2A activator	PPP2R4;DKFZp781M17165	>tr|A6PVN5|A6PVN5_HUMAN Serine/threonine-protein phosphatase 2A activator OS=Homo sapiens GN=PPP2R4 PE=1 SV=1;>sp|Q15257|PTPA_HUMAN Serine/threonine-protein phosphatase 2A activator OS=Homo sapiens GN=PPP2R4 PE=1 SV=3;>tr|F6WIT2|F6WIT2_HUMAN Serine/threoni	ENSG00000119383	ENSP00000335200;ENSP00000337412;ENSP00000337448;ENSP00000347109;ENSP00000349726;ENSP00000351885;ENSP00000377036;ENSP00000395499;ENSP00000403542;ENSP00000406997	A6PVN5_HUMAN;A6PVN9_HUMAN;PTPA_HUMAN;Q5T948_HUMAN;Q5T949_HUMAN;Q68CR8_HUMAN	Not Sig	logFC < 2.0	UNCERTAIN
365	21.8803	20.5619	20.8026	21.4507	21.9412	21.9218	20.9876	21.9684	NA	NA	NA	NA	NA	431	0.664155	0.281458	0.530864	0.222624	A6PW57;Q99755;A6PW58;A2A5X0	A6PW57;Q99755;A6PW58;A2A5X0	Phosphatidylinositol 4-phosphate 5-kinase type-1 alpha	PIP5K1A	>tr|A6PW57|A6PW57_HUMAN Phosphatidylinositol 4-phosphate 5-kinase type-1 alpha OS=Homo sapiens GN=PIP5K1A PE=1 SV=2;>sp|Q99755|PI51A_HUMAN Phosphatidylinositol 4-phosphate 5-kinase type-1 alpha OS=Homo sapiens GN=PIP5K1A PE=1 SV=1;>tr|A6PW58|A6PW58_HUMAN P	ENSG00000143398	ENSP00000271663;ENSP00000357883;ENSP00000357885;ENSP00000386432;ENSP00000401228;ENSP00000414632;ENSP00000415648	A2A5X0_HUMAN;A6PW57_HUMAN;A6PW58_HUMAN;PI51A_HUMAN	Not Sig	logFC < 2.0	UNCERTAIN
366	22.1488	21.8412	20.8744	22.1493	21.3734	21.0102	21.2545	21.6253	NA	NA	NA	NA	NA	432	0.637588	0.338456	-0.437594	-0.187983	A6PWM2;Q6UXH1	A6PWM2;Q6UXH1	Cysteine-rich with EGF-like domain protein 2	CRELD2	>tr|A6PWM2|A6PWM2_HUMAN Cysteine-rich with EGF-like domain protein 2 (Fragment) OS=Homo sapiens GN=CRELD2 PE=1 SV=1;>sp|Q6UXH1|CREL2_HUMAN Cysteine-rich with EGF-like domain protein 2 OS=Homo sapiens GN=CRELD2 PE=1 SV=1	ENSG00000184164	ENSP00000332223;ENSP00000383938;ENSP00000384111;ENSP00000386034;ENSP00000387769	A6PWM2_HUMAN;CREL2_HUMAN	Not Sig	logFC < 2.0	UNCERTAIN
367	23.1578	23.3692	23.0367	23.0485	22.7238	22.5729	23.069	22.8318	NA	NA	NA	NA	NA	433	1.46399	0.38738	-0.35367	-0.166064	A6ZKI3;Q17RB0;Q9BWD3	A6ZKI3;Q17RB0;Q9BWD3	Protein FAM127A;Protein FAM127C;Protein FAM127B	FAM127A;FAM127C;FAM127B	>sp|A6ZKI3|F127A_HUMAN Protein FAM127A OS=Homo sapiens GN=FAM127A PE=1 SV=1;>sp|Q17RB0|F127C_HUMAN Protein FAM127C OS=Homo sapiens GN=FAM127C PE=1 SV=1;>sp|Q9BWD3|F127B_HUMAN Protein FAM127B OS=Homo sapiens GN=FAM127B PE=1 SV=3	ENSG00000134590;ENSG00000203950;ENSG00000212747	ENSP00000257013;ENSP00000375267;ENSP00000375268	F127A_HUMAN;F127B_HUMAN;F127C_HUMAN	Not Sig	logFC < 2.0	UNCERTAIN
368	26.7582	26.6543	26.3012	26.9303	25.7218	26.2203	26.2967	26.6221	NA	NA	NA	NA	NA	435	1.00411	0.311823	-0.445802	-0.200035	A8K878;P55145;H7C2D6	A8K878;P55145	Mesencephalic astrocyte-derived neurotrophic factor	MANF	>tr|A8K878|A8K878_HUMAN Mesencephalic astrocyte-derived neurotrophic factor OS=Homo sapiens GN=MANF PE=1 SV=1;>sp|P55145|MANF_HUMAN Mesencephalic astrocyte-derived neurotrophic factor OS=Homo sapiens GN=MANF PE=1 SV=3	ENSG00000145050;ENSG00000259880	ENSP00000432799;ENSP00000454660	A8K878_HUMAN;MANF_HUMAN	Not Sig	logFC < 2.0	UNCERTAIN
369	25.3528	25.561	25.4736	25.559	25.5479	25.2078	25.1804	25.1464	NA	NA	NA	NA	NA	436	1.06405	0.551387	-0.215997	-0.102593	A8MQ02;J3KN01;P55196;Q5TIG5;F8W9I4;E9PFY5;H0Y8L4;H0Y9I0;H0YA98;H0Y948	A8MQ02;J3KN01;P55196;Q5TIG5	Afadin	MLLT4	>tr|A8MQ02|A8MQ02_HUMAN Afadin OS=Homo sapiens GN=MLLT4 PE=1 SV=2;>tr|J3KN01|J3KN01_HUMAN Afadin OS=Homo sapiens GN=MLLT4 PE=1 SV=1;>sp|P55196|AFAD_HUMAN Afadin OS=Homo sapiens GN=MLLT4 PE=1 SV=3;>tr|Q5TIG5|Q5TIG5_HUMAN Afadin OS=Homo sapiens GN=MLLT4 PE=1	ENSG00000130396	ENSP00000252692;ENSP00000341118;ENSP00000355771;ENSP00000375956;ENSP00000383623;ENSP00000404595	A8MQ02_HUMAN;AFAD_HUMAN;J3KN01_HUMAN;Q5TIG5_HUMAN	Not Sig	logFC < 2.0	UNCERTAIN
370	23.0962	23.3261	23.1221	23.1181	23.1036	22.3407	22.4575	22.356	NA	NA	NA	NA	NA	437	1.71655	0.21166	-0.601173	-0.274587	A8MQB8;G3V0J0;A0A087WXI3;Q06787;G8JLE9;A0A087WWR6;Q8IXW7	A8MQB8;G3V0J0;A0A087WXI3;Q06787;G8JLE9	Fragile X mental retardation protein 1	FMR1	>tr|A8MQB8|A8MQB8_HUMAN Fragile X mental retardation protein 1 OS=Homo sapiens GN=FMR1 PE=1 SV=1;>tr|G3V0J0|G3V0J0_HUMAN Fragile X mental retardation 1, isoform CRA_e OS=Homo sapiens GN=FMR1 PE=1 SV=1;>tr|A0A087WXI3|A0A087WXI3_HUMAN Fragile X mental retard	ENSG00000102081;ENSG00000268103	ENSP00000359501;ENSP00000359502;ENSP00000359506;ENSP00000359508;ENSP00000395923;ENSP00000472650;ENSP00000472931	A8MQB8_HUMAN;FMR1_HUMAN;G3V0J0_HUMAN;G8JLE9_HUMAN	Not Sig	logFC < 2.0	UNCERTAIN
371	22.2223	22.2146	22.2179	22.0778	23.3156	22.1335	20.6522	22.1206	NA	NA	NA	NA	NA	438	0.0845923	0.758731	-0.127666	-0.0501366	H0YEW4;H0YD21;A8MRA7;I3L448;Q5TC12	H0YEW4;H0YD21;A8MRA7;I3L448;Q5TC12	ATP synthase mitochondrial F1 complex assembly factor 1	ATPAF1	>tr|H0YEW4|H0YEW4_HUMAN ATP synthase mitochondrial F1 complex assembly factor 1 (Fragment) OS=Homo sapiens GN=ATPAF1 PE=1 SV=1;>tr|H0YD21|H0YD21_HUMAN ATP synthase mitochondrial F1 complex assembly factor 1 (Fragment) OS=Homo sapiens GN=ATPAF1 PE=1 SV=1;>t	ENSG00000123472	ENSP00000330685;ENSP00000361005;ENSP00000432771;ENSP00000435732;ENSP00000436690;ENSP00000443588;ENSP00000460964	A8MRA7_HUMAN;ATPF1_HUMAN;H0YD21_HUMAN;H0YEW4_HUMAN;I3L448_HUMAN	Not Sig	logFC < 2.0	UNCERTAIN
372	27.22	27.0745	26.8149	27.3604	26.6974	27.3251	27.4216	27.698	NA	NA	NA	NA	NA	439	0.29042	0.655794	0.168027	0.0749669	A8MT02;P14678;J3QLE5;P63162;J3KRY3;S4R3P3	A8MT02;P14678;J3QLE5;P63162;J3KRY3;S4R3P3	Small nuclear ribonucleoprotein-associated proteins B and B;Small nuclear ribonucleoprotein-associated protein N	SNRPB;SNRPN	>tr|A8MT02|A8MT02_HUMAN Small nuclear ribonucleoprotein-associated proteins B and B OS=Homo sapiens GN=SNRPB PE=1 SV=3;>sp|P14678|RSMB_HUMAN Small nuclear ribonucleoprotein-associated proteins B and B OS=Homo sapiens GN=SNRPB PE=1 SV=2;>tr|J3QLE5|J3QLE5_	ENSG00000125835;ENSG00000128739	ENSP00000306223;ENSP00000342305;ENSP00000370746;ENSP00000375105;ENSP00000382969;ENSP00000382970;ENSP00000382972;ENSP00000412566;ENSP00000462211;ENSP00000463458;ENSP00000463510	A8MT02_HUMAN;J3KRY3_HUMAN;J3QLE5_HUMAN;RSMB_HUMAN;RSMN_HUMAN	Not Sig	logFC < 2.0	UNCERTAIN
373	23.3359	23.3507	23.2093	23.5514	23.2349	23.0193	22.9281	23.3897	NA	NA	NA	NA	NA	440	0.875183	0.550376	-0.21884	-0.102931	A8MT40;Q8NCN5;H3BQG3;H3BUH3;B7ZAR9	A8MT40;Q8NCN5	Pyruvate dehydrogenase phosphatase regulatory subunit, mitochondrial	PDPR	>tr|A8MT40|A8MT40_HUMAN Pyruvate dehydrogenase phosphatase regulatory subunit, mitochondrial OS=Homo sapiens GN=PDPR PE=1 SV=2;>sp|Q8NCN5|PDPR_HUMAN Pyruvate dehydrogenase phosphatase regulatory subunit, mitochondrial OS=Homo sapiens GN=PDPR PE=1 SV=2	ENSG00000090857	ENSP00000288050;ENSP00000381190;ENSP00000457916	A8MT40_HUMAN;PDPR_HUMAN	Not Sig	logFC < 2.0	UNCERTAIN
374	21.9379	22.1368	22.2414	21.9792	22.4529	22.2873	21.9416	22.1222	NA	NA	NA	NA	NA	441	0.435596	0.715841	0.127199	0.0597084	A8MTY9;O14972;A8MY26	A8MTY9;O14972;A8MY26	Down syndrome critical region protein 3	DSCR3	>tr|A8MTY9|A8MTY9_HUMAN Down syndrome critical region protein 3 OS=Homo sapiens GN=DSCR3 PE=1 SV=1;>sp|O14972|DSCR3_HUMAN Down syndrome critical region protein 3 OS=Homo sapiens GN=DSCR3 PE=2 SV=1;>tr|A8MY26|A8MY26_HUMAN Down syndrome critical region prote	ENSG00000157538	ENSP00000311399;ENSP00000381964;ENSP00000381967	A8MTY9_HUMAN;A8MY26_HUMAN;DSCR3_HUMAN	Not Sig	logFC < 2.0	UNCERTAIN
375	22.053	22.2349	22.4345	22.1743	22.1617	22.2094	22.2452	22.4135	NA	NA	NA	NA	NA	443	0.129419	0.931839	0.0332861	0.0158758	A8MUM1;Q53HC9;F8WDS8;C9J0U9;D3YTH5;F8WDX0;F8WB12;C9JVR6	A8MUM1;Q53HC9;F8WDS8;C9J0U9;D3YTH5;F8WDX0;F8WB12	Protein TSSC1	TSSC1	>tr|A8MUM1|A8MUM1_HUMAN Protein TSSC1 OS=Homo sapiens GN=TSSC1 PE=1 SV=2;>sp|Q53HC9|TSSC1_HUMAN Protein TSSC1 OS=Homo sapiens GN=TSSC1 PE=1 SV=2;>tr|F8WDS8|F8WDS8_HUMAN Protein TSSC1 OS=Homo sapiens GN=TSSC1 PE=1 SV=1;>tr|C9J0U9|C9J0U9_HUMAN Protein TSSC1	ENSG00000032389	ENSP00000371559;ENSP00000381652;ENSP00000385756;ENSP00000389080;ENSP00000389228;ENSP00000400214;ENSP00000403043	A8MUM1_HUMAN;C9J0U9_HUMAN;D3YTH5_HUMAN;F8WB12_HUMAN;F8WDS8_HUMAN;F8WDX0_HUMAN;TSSC1_HUMAN	Not Sig	logFC < 2.0	UNCERTAIN
376	27.4292	27.5919	27.9033	27.8364	27.6078	27.4954	27.2366	27.4937	NA	NA	NA	NA	NA	444	0.863979	0.53078	-0.231806	-0.108574	H7BY10;K7EJV9;K7ERT8;A8MUS3;P62750;K7EMA7	H7BY10;K7EJV9;K7ERT8;A8MUS3;P62750;K7EMA7	60S ribosomal protein L23a	RPL23A	>tr|H7BY10|H7BY10_HUMAN 60S ribosomal protein L23a (Fragment) OS=Homo sapiens GN=RPL23A PE=1 SV=1;>tr|K7EJV9|K7EJV9_HUMAN 60S ribosomal protein L23a (Fragment) OS=Homo sapiens GN=RPL23A PE=1 SV=1;>tr|K7ERT8|K7ERT8_HUMAN 60S ribosomal protein L23a (Fragment	ENSG00000198242	ENSP00000347969;ENSP00000378396;ENSP00000389103;ENSP00000465342;ENSP00000466425;ENSP00000468172;ENSP00000468402	A8MUS3_HUMAN;H7BY10_HUMAN;K7EJV9_HUMAN;K7EMA7_HUMAN;K7ERT8_HUMAN;RL23A_HUMAN	Not Sig	logFC < 2.0	UNCERTAIN
377	25.7438	25.8111	25.4669	26.0687	25.2578	25.7943	25.6168	26.1801	NA	NA	NA	NA	NA	445	0.0967726	0.870401	-0.0603485	-0.0270843	Q49AN9;F5H013;P62308;A8MWD9;C9JVQ0	Q49AN9;F5H013;P62308;A8MWD9	Small nuclear ribonucleoprotein G;Putative small nuclear ribonucleoprotein G-like protein 15	SNRPG;SNRPGP15	>tr|Q49AN9|Q49AN9_HUMAN SNRPG protein OS=Homo sapiens GN=SNRPG PE=1 SV=1;>tr|F5H013|F5H013_HUMAN Small nuclear ribonucleoprotein G OS=Homo sapiens GN=SNRPG PE=1 SV=1;>sp|P62308|RUXG_HUMAN Small nuclear ribonucleoprotein G OS=Homo sapiens GN=SNRPG PE=1 SV=1	ENSG00000143977	ENSP00000272348;ENSP00000391403;ENSP00000402194;ENSP00000416334;ENSP00000441332	F5H013_HUMAN;Q49AN9_HUMAN;RUXG_HUMAN;RUXGL_HUMAN	Not Sig	logFC < 2.0	UNCERTAIN
378	24.2827	23.9317	24.5556	24.1037	23.5579	23.0177	23.0626	22.5702	NA	NA	NA	NA	NA	449	2.53176	0.0419643	-1.1663	-0.520213	A8MYQ9;Q9BZG1;C9JBG0;C9JY26;Q96PJ7;E7ES60;J3QLC6;K7EIF2;H7C0Y7;V9GY61;K7EJW7	A8MYQ9;Q9BZG1;C9JBG0;C9JY26;Q96PJ7;E7ES60	Ras-related protein Rab-34	RAB34	>tr|A8MYQ9|A8MYQ9_HUMAN Ras-related protein Rab-34, isoform NARR OS=Homo sapiens GN=RAB34 PE=1 SV=2;>sp|Q9BZG1|RAB34_HUMAN Ras-related protein Rab-34 OS=Homo sapiens GN=RAB34 PE=1 SV=1;>tr|C9JBG0|C9JBG0_HUMAN Ras-related protein Rab-34, isoform NARR (Fragm	ENSG00000109113	ENSP00000226259;ENSP00000301043;ENSP00000378663;ENSP00000378664;ENSP00000378666;ENSP00000391048;ENSP00000398706;ENSP00000404180;ENSP00000407953;ENSP00000410279;ENSP00000413156	A8MYQ9_HUMAN;C9JBG0_HUMAN;C9JY26_HUMAN;E7ES60_HUMAN;Q96PJ7_HUMAN;RAB34_HUMAN	Not Sig	logFC < 2.0	UNCERTAIN
379	22.3213	22.6406	22.8655	22.0589	22.6872	22.1182	22.0785	21.9688	NA	NA	NA	NA	NA	451	0.492032	0.509251	-0.258377	-0.115373	A8MYT4;Q8NEB9;M0R308	A8MYT4;Q8NEB9	Phosphatidylinositol 3-kinase;Phosphatidylinositol 3-kinase catalytic subunit type 3	PIK3C3	>tr|A8MYT4|A8MYT4_HUMAN Phosphatidylinositol 3-kinase OS=Homo sapiens GN=PIK3C3 PE=1 SV=2;>sp|Q8NEB9|PK3C3_HUMAN Phosphatidylinositol 3-kinase catalytic subunit type 3 OS=Homo sapiens GN=PIK3C3 PE=1 SV=1	ENSG00000078142	ENSP00000262039;ENSP00000381845	A8MYT4_HUMAN;PK3C3_HUMAN	Not Sig	logFC < 2.0	UNCERTAIN
380	23.1322	23.1888	20.7813	22.8436	22.8799	23.2326	23.0852	23.0358	NA	NA	NA	NA	NA	452	0.442935	0.282372	0.571912	0.221844	J3QKW7;A8MZF9;P55039;J3QRI9;J3QR71;J3QL90;J3KRL5;J3QKV7;J3QLF3	J3QKW7;A8MZF9;P55039;J3QRI9;J3QR71	Developmentally-regulated GTP-binding protein 2	DRG2	>tr|J3QKW7|J3QKW7_HUMAN Developmentally-regulated GTP-binding protein 2 OS=Homo sapiens GN=DRG2 PE=1 SV=1;>tr|A8MZF9|A8MZF9_HUMAN Developmentally-regulated GTP-binding protein 2 OS=Homo sapiens GN=DRG2 PE=1 SV=1;>sp|P55039|DRG2_HUMAN Developmentally-regula	ENSG00000108591	ENSP00000225729;ENSP00000379076;ENSP00000463268;ENSP00000464076;ENSP00000464244	A8MZF9_HUMAN;DRG2_HUMAN;J3QKW7_HUMAN;J3QR71_HUMAN;J3QRI9_HUMAN	Not Sig	logFC < 2.0	UNCERTAIN
381	25.7673	26.1143	26.1948	25.8318	26.502	25.7326	25.6033	25.3341	NA	NA	NA	NA	NA	453	0.281514	0.630777	-0.184075	-0.0810383	A9Z1X7;Q8IYB3;E9PCT1;M0R088;M0QXG5;M0R1E7	A9Z1X7;Q8IYB3;E9PCT1;M0R088	Serine/arginine repetitive matrix protein 1	SRRM1	>tr|A9Z1X7|A9Z1X7_HUMAN Serine/arginine repetitive matrix protein 1 OS=Homo sapiens GN=SRRM1 PE=1 SV=1;>sp|Q8IYB3|SRRM1_HUMAN Serine/arginine repetitive matrix protein 1 OS=Homo sapiens GN=SRRM1 PE=1 SV=2;>tr|E9PCT1|E9PCT1_HUMAN Serine/arginine repetitive	ENSG00000133226	ENSP00000326261;ENSP00000363510;ENSP00000391430;ENSP00000471084	A9Z1X7_HUMAN;E9PCT1_HUMAN;M0R088_HUMAN;SRRM1_HUMAN	Not Sig	logFC < 2.0	UNCERTAIN
382	26.9498	27.084	27.3002	26.8834	27.2622	27.0732	26.94	27.023	NA	NA	NA	NA	NA	454	0.0626186	0.965436	0.0202155	0.00956018	B0QY89;Q9Y262;B0QY90;C9JHP4;C9K0Q7;H7C3A0;H0Y7E6	B0QY89;Q9Y262;B0QY90	Eukaryotic translation initiation factor 3 subunit L	EIF3L	>tr|B0QY89|B0QY89_HUMAN Eukaryotic translation initiation factor 3 subunit L OS=Homo sapiens GN=EIF3L PE=1 SV=1;>sp|Q9Y262|EIF3L_HUMAN Eukaryotic translation initiation factor 3 subunit L OS=Homo sapiens GN=EIF3L PE=1 SV=1;>tr|B0QY90|B0QY90_HUMAN Eukaryoti	ENSG00000100129	ENSP00000371099;ENSP00000384634;ENSP00000400645;ENSP00000416892	B0QY89_HUMAN;B0QY90_HUMAN;EIF3L_HUMAN	Not Sig	logFC < 2.0	UNCERTAIN
383	26.5605	26.4492	26.1842	26.8954	25.8863	26.8206	26.764	26.8846	NA	NA	NA	NA	NA	455	0.0868797	0.857991	0.0665221	0.0292051	B0QYK0;Q01844;A0A0D9SFL3;C9JGE3;H7BY36;F8WC90	B0QYK0;Q01844;A0A0D9SFL3;C9JGE3;H7BY36	RNA-binding protein EWS	EWSR1	>tr|B0QYK0|B0QYK0_HUMAN RNA-binding protein EWS OS=Homo sapiens GN=EWSR1 PE=1 SV=1;>sp|Q01844|EWS_HUMAN RNA-binding protein EWS OS=Homo sapiens GN=EWSR1 PE=1 SV=1;>tr|A0A0D9SFL3|A0A0D9SFL3_HUMAN RNA-binding protein EWS OS=Homo sapiens GN=EWSR1 PE=1 SV=1;>t	ENSG00000182944	ENSP00000327456;ENSP00000330516;ENSP00000330896;ENSP00000331699;ENSP00000353204;ENSP00000381031;ENSP00000385726;ENSP00000400142	B0QYK0_HUMAN;C9JGE3_HUMAN;EWS_HUMAN;H7BY36_HUMAN	Not Sig	logFC < 2.0	UNCERTAIN
384	27.71	27.7259	27.7905	27.6911	27.8992	27.7651	27.737	27.6332	NA	NA	NA	NA	NA	457	0.195929	0.938401	0.0292573	0.0142103	B0YIW6;P48444;Q6P1Q5;E9PK34	B0YIW6;P48444	Coatomer subunit delta	ARCN1	>tr|B0YIW6|B0YIW6_HUMAN Archain 1, isoform CRA_a OS=Homo sapiens GN=ARCN1 PE=1 SV=1;>sp|P48444|COPD_HUMAN Coatomer subunit delta OS=Homo sapiens GN=ARCN1 PE=1 SV=1	ENSG00000095139;ENSG00000269382	ENSP00000264028;ENSP00000352385;ENSP00000376599;ENSP00000468926;ENSP00000471768	B0YIW6_HUMAN;COPD_HUMAN	Not Sig	logFC < 2.0	UNCERTAIN
385	25.2793	25.2839	24.8648	25.4792	24.9789	25.0251	25.2172	25.3852	NA	NA	NA	NA	NA	459	0.184394	0.833935	-0.0752063	-0.0348249	B1AHD1;P55769	B1AHD1;P55769	NHP2-like protein 1;NHP2-like protein 1, N-terminally processed	NHP2L1	>tr|B1AHD1|B1AHD1_HUMAN NHP2-like protein 1 OS=Homo sapiens GN=SNU13 PE=1 SV=1;>sp|P55769|NH2L1_HUMAN NHP2-like protein 1 OS=Homo sapiens GN=SNU13 PE=1 SV=3	ENSG00000100138	ENSP00000215956;ENSP00000347401;ENSP00000383949;ENSP00000383989	B1AHD1_HUMAN;NH2L1_HUMAN	Not Sig	logFC < 2.0	UNCERTAIN
386	22.6463	22.6837	23.1289	22.7585	22.6992	22.2859	22.5277	22.5634	NA	NA	NA	NA	NA	460	1.05534	0.459586	-0.285308	-0.13331	B1AK81;Q92643;A6NEM5	B1AK81;Q92643;A6NEM5	GPI-anchor transamidase	PIGK	>tr|B1AK81|B1AK81_HUMAN GPI-anchor transamidase OS=Homo sapiens GN=PIGK PE=1 SV=1;>sp|Q92643|GPI8_HUMAN GPI-anchor transamidase OS=Homo sapiens GN=PIGK PE=1 SV=2;>tr|A6NEM5|A6NEM5_HUMAN GPI-anchor transamidase OS=Homo sapiens GN=PIGK PE=1 SV=1	ENSG00000142892	ENSP00000352041;ENSP00000359848;ENSP00000388854	A6NEM5_HUMAN;B1AK81_HUMAN;GPI8_HUMAN	Not Sig	logFC < 2.0	UNCERTAIN
387	28.2427	28.0886	27.947	28.2706	27.8801	28.2889	28.1916	28.482	NA	NA	NA	NA	NA	461	0.198141	0.836432	0.0734177	0.0342066	B1AK87;B1AK88	B1AK87;B1AK88	NA	CAPZB	>tr|B1AK87|B1AK87_HUMAN Capping protein (Actin filament) muscle Z-line, beta, isoform CRA_a OS=Homo sapiens GN=CAPZB PE=1 SV=1;>tr|B1AK88|B1AK88_HUMAN Capping protein (Actin filament) muscle Z-line, beta, isoform CRA_d OS=Homo sapiens GN=CAPZB PE=1 SV=1	ENSG00000077549	ENSP00000364286;ENSP00000401010	B1AK87_HUMAN;B1AK88_HUMAN	Not Sig	logFC < 2.0	UNCERTAIN
388	25.8145	25.9697	26.4079	25.6135	24.5049	23.9807	24.3103	24.0975	NA	NA	NA	+	Pos	464	3.82058	0.00814035	-1.72804	-0.783767	B1AKY9;P50993;H0Y7C1;Q13733;E9PRA5;P54707	B1AKY9;P50993;H0Y7C1	Sodium/potassium-transporting ATPase subunit alpha-2	ATP1A2	>tr|B1AKY9|B1AKY9_HUMAN Sodium/potassium-transporting ATPase subunit alpha OS=Homo sapiens GN=ATP1A2 PE=1 SV=1;>sp|P50993|AT1A2_HUMAN Sodium/potassium-transporting ATPase subunit alpha-2 OS=Homo sapiens GN=ATP1A2 PE=1 SV=1;>tr|H0Y7C1|H0Y7C1_HUMAN Sodium/po	ENSG00000018625	ENSP00000354490;ENSP00000376066;ENSP00000411705	AT1A2_HUMAN;B1AKY9_HUMAN;H0Y7C1_HUMAN	FDR < 0.01	logFC < 2.0	REGULATED but logFC < 2.0
389	21.8446	21.9814	21.8644	22.1785	22.0332	21.812	21.6112	21.7485	NA	NA	NA	NA	NA	466	0.689207	0.640152	-0.166012	-0.0784316	B1ALB4;E9PD50;Q92540	B1ALB4;E9PD50;Q92540	Protein SMG7	SMG7	>tr|B1ALB4|B1ALB4_HUMAN Protein SMG7 (Fragment) OS=Homo sapiens GN=SMG7 PE=1 SV=7;>tr|E9PD50|E9PD50_HUMAN Protein SMG7 OS=Homo sapiens GN=SMG7 PE=1 SV=1;>sp|Q92540|SMG7_HUMAN Protein SMG7 OS=Homo sapiens GN=SMG7 PE=1 SV=2	ENSG00000116698	ENSP00000340766;ENSP00000356507;ENSP00000388390;ENSP00000421358	B1ALB4_HUMAN;E9PD50_HUMAN;SMG7_HUMAN	Not Sig	logFC < 2.0	UNCERTAIN
390	20.7387	22.0742	20.3782	21.2455	21.7573	21.6265	22.1806	21.4541	NA	NA	+	NA	NA	467	0.804763	0.219871	0.645492	0.269077	B1ALD9;Q15063;CON__Q2KJC7	B1ALD9;Q15063;CON__Q2KJC7	Periostin	POSTN	>tr|B1ALD9|B1ALD9_HUMAN Periostin OS=Homo sapiens GN=POSTN PE=1 SV=1;>sp|Q15063|POSTN_HUMAN Periostin OS=Homo sapiens GN=POSTN PE=1 SV=2;>Q2KJC7 TREMBL:Q2KJC7;Q8HZM3 (Bos taurus) Periostin, osteoblast specific factor	ENSG00000133110	ENSP00000369066;ENSP00000369071;ENSP00000369073;ENSP00000437959	B1ALD9_HUMAN;POSTN_HUMAN	Not Sig	logFC < 2.0	UNCERTAIN
391	24.4599	24.5679	24.281	24.2956	25.2621	24.9747	24.6765	25.0126	NA	NA	NA	NA	NA	468	2.24311	0.218156	0.580371	0.271414	B1ALK7;Q14155;E7EUY6;E9PDQ5;C9JDI6;B1ANY6;F6SJA5;E7ENL8;E7EU80	B1ALK7;Q14155;E7EUY6;E9PDQ5	Rho guanine nucleotide exchange factor 7	ARHGEF7	>tr|B1ALK7|B1ALK7_HUMAN Rho guanine nucleotide exchange factor 7 OS=Homo sapiens GN=ARHGEF7 PE=1 SV=1;>sp|Q14155|ARHG7_HUMAN Rho guanine nucleotide exchange factor 7 OS=Homo sapiens GN=ARHGEF7 PE=1 SV=2;>tr|E7EUY6|E7EUY6_HUMAN Rho guanine nucleotide exchan	ENSG00000102606	ENSP00000218789;ENSP00000325994;ENSP00000359657;ENSP00000364875;ENSP00000364888;ENSP00000364891;ENSP00000364893;ENSP00000397068;ENSP00000417596;ENSP00000418067	ARHG7_HUMAN;B1ALK7_HUMAN;E7EUY6_HUMAN;E9PDQ5_HUMAN	Not Sig	logFC < 2.0	UNCERTAIN
392	22.7923	22.8761	22.6753	22.7211	23.5493	23.9337	24.0239	24.2575	NA	NA	NA	NA	NA	469	3.58189	0.035961	1.17491	0.545526	B1ALU1;B1ALU3;O95490;H0Y5C0	B1ALU1;B1ALU3;O95490;H0Y5C0	Latrophilin-2	LPHN2	>tr|B1ALU1|B1ALU1_HUMAN Adhesion G protein-coupled receptor L2 OS=Homo sapiens GN=ADGRL2 PE=1 SV=1;>tr|B1ALU3|B1ALU3_HUMAN Adhesion G protein-coupled receptor L2 OS=Homo sapiens GN=ADGRL2 PE=1 SV=1;>sp|O95490|AGRL2_HUMAN Adhesion G protein-coupled receptor	ENSG00000117114	ENSP00000271029;ENSP00000322270;ENSP00000337306;ENSP00000353006;ENSP00000359748;ENSP00000359750;ENSP00000359752;ENSP00000359756;ENSP00000359758;ENSP00000359760;ENSP00000359762;ENSP00000359763;ENSP00000359765;ENSP00000378344;ENSP00000397740	B1ALU1_HUMAN;B1ALU3_HUMAN;H0Y5C0_HUMAN;LPHN2_HUMAN	Not Sig	logFC < 2.0	UNCERTAIN
393	24.5466	24.685	24.8378	24.6856	25.3841	25.0483	25.3248	25.2608	NA	NA	NA	NA	NA	471	3.01501	0.218887	0.565736	0.270129	B1AMS2;Q14141	B1AMS2;Q14141	Septin-6	2016-09-06	>tr|B1AMS2|B1AMS2_HUMAN Septin 6, isoform CRA_b OS=Homo sapiens GN=SEPT6 PE=1 SV=1;>sp|Q14141|SEPT6_HUMAN Septin-6 OS=Homo sapiens GN=SEPT6 PE=1 SV=4	ENSG00000125354	ENSP00000341524;ENSP00000346169;ENSP00000346397;ENSP00000353278;ENSP00000378108;ENSP00000418715;ENSP00000435818	B1AMS2_HUMAN;SEPT6_HUMAN	Not Sig	logFC < 2.0	UNCERTAIN
394	23.2465	23.0717	22.3034	22.9161	22.3372	22.8687	21.0475	23.2016	NA	NA	NA	NA	NA	472	0.453592	0.30504	-0.520658	-0.20694	B1ANH5;Q16774;B1ANH0;B1ANG9;B1ANH6;B1ANH2;B1ANH3	B1ANH5;Q16774;B1ANH0;B1ANG9;B1ANH6;B1ANH2;B1ANH3	Guanylate kinase	GUK1	>tr|B1ANH5|B1ANH5_HUMAN Guanylate kinase OS=Homo sapiens GN=GUK1 PE=1 SV=1;>sp|Q16774|KGUA_HUMAN Guanylate kinase OS=Homo sapiens GN=GUK1 PE=1 SV=2;>tr|B1ANH0|B1ANH0_HUMAN Guanylate kinase (Fragment) OS=Homo sapiens GN=GUK1 PE=1 SV=1;>tr|B1ANG9|B1ANG9_HUMA	ENSG00000143774	ENSP00000317659;ENSP00000355677;ENSP00000355679;ENSP00000355682;ENSP00000355683;ENSP00000355684;ENSP00000355687;ENSP00000355691;ENSP00000375738;ENSP00000401832;ENSP00000403664;ENSP00000407604	B1ANG9_HUMAN;B1ANH0_HUMAN;B1ANH2_HUMAN;B1ANH3_HUMAN;B1ANH5_HUMAN;B1ANH6_HUMAN;KGUA_HUMAN	Not Sig	logFC < 2.0	UNCERTAIN
395	26.0801	25.8679	25.9688	26.1265	25.474	26.0213	26.2361	26.3177	NA	NA	NA	NA	NA	473	0.00241874	0.998059	0.00144148	0.000655614	B1ANR0;Q13310;H0Y5F5;H0YEU6;B1ANR1;H0YEQ8;H0YCC8;H0Y6X6;H0YER0;P0CB38	B1ANR0;Q13310;H0Y5F5	Polyadenylate-binding protein 4	PABPC4	>tr|B1ANR0|B1ANR0_HUMAN Polyadenylate-binding protein OS=Homo sapiens GN=PABPC4 PE=1 SV=1;>sp|Q13310|PABP4_HUMAN Polyadenylate-binding protein 4 OS=Homo sapiens GN=PABPC4 PE=1 SV=1;>tr|H0Y5F5|H0Y5F5_HUMAN Polyadenylate-binding protein (Fragment) OS=Homo sa	ENSG00000090621	ENSP00000361947;ENSP00000361948;ENSP00000361949;ENSP00000361953;ENSP00000398267	B1ANR0_HUMAN;H0Y5F5_HUMAN;PABP4_HUMAN	Not Sig	logFC < 2.0	UNCERTAIN
396	22.8612	22.5868	22.9024	22.8558	23.5394	23.3086	23.3035	23.265	NA	NA	NA	NA	NA	474	2.93072	0.225101	0.55256	0.263675	B1APM4;P35610	B1APM4;P35610	Sterol O-acyltransferase 1	SOAT1	>tr|B1APM4|B1APM4_HUMAN Sterol O-acyltransferase 1 (Fragment) OS=Homo sapiens GN=SOAT1 PE=1 SV=1;>sp|P35610|SOAT1_HUMAN Sterol O-acyltransferase 1 OS=Homo sapiens GN=SOAT1 PE=1 SV=3	ENSG00000057252	ENSP00000356591;ENSP00000411309;ENSP00000441356;ENSP00000445315	B1APM4_HUMAN;SOAT1_HUMAN	Not Sig	logFC < 2.0	UNCERTAIN
397	27.8294	27.6362	28.1398	28.8388	27.058	27.0205	27.9009	27.6968	NA	NA	NA	NA	NA	475	1.03541	0.188804	-0.69202	-0.295021	B2R4S9;U3KQK0;Q99879;Q99877;Q93079;Q5QNW6;P62807;P58876;O60814;Q99880;P57053;Q96A08	B2R4S9;U3KQK0;Q99879;Q99877;Q93079;Q5QNW6;P62807;P58876;O60814;Q99880;P57053	Histone H2B;Histone H2B type 1-M;Histone H2B type 1-N;Histone H2B type 1-H;Histone H2B type 2-F;Histone H2B type 1-C/E/F/G/I;Histone H2B type 1-D;Histone H2B type 1-K;Histone H2B type 1-L;Histone H2B type F-S	HIST1H2BC;HIST1H2BN;HIST1H2BM;HIST1H2BH;HIST2H2BF;HIST1H2BD;HIST1H2BK;HIST1H2BL;H2BFS	>tr|B2R4S9|B2R4S9_HUMAN Histone H2B OS=Homo sapiens GN=HIST1H2BC PE=2 SV=1;>tr|U3KQK0|U3KQK0_HUMAN Histone H2B OS=Homo sapiens GN=HIST1H2BN PE=1 SV=1;>sp|Q99879|H2B1M_HUMAN Histone H2B type 1-M OS=Homo sapiens GN=HIST1H2BM PE=1 SV=3;>sp|Q99877|H2B1N_HUMAN	ENSG00000158373;ENSG00000168242;ENSG00000180596;ENSG00000185130;ENSG00000187990;ENSG00000196374;ENSG00000197459;ENSG00000197697;ENSG00000197846;ENSG00000197903;ENSG00000203814;ENSG00000233822;ENSG00000263376	ENSP00000244601;ENSP00000289316;ENSP00000321744;ENSP00000348706;ENSP00000348924;ENSP00000349430;ENSP00000352442;ENSP00000353074;ENSP00000358164;ENSP00000366618;ENSP00000366962;ENSP00000367008;ENSP00000380100;ENSP00000380177;ENSP00000380180;ENSP00000445831;ENSP00000446031;ENSP00000462132;ENSP00000464073	B2R4S9_HUMAN;H2B1C_HUMAN;H2B1D_HUMAN;H2B1H_HUMAN;H2B1K_HUMAN;H2B1L_HUMAN;H2B1M_HUMAN;H2B1N_HUMAN;H2B2F_HUMAN;H2BFS_HUMAN	Not Sig	logFC < 2.0	UNCERTAIN
398	28.8058	28.7536	28.3405	29.1176	28.302	28.9476	29.2078	29.2342	NA	NA	NA	NA	NA	476	0.256172	0.657285	0.168546	0.0742733	G3V4W0;B4DY08;B2R5W2;G3V4C1;G3V576;G3V2Q1;P07910;G3V251;G3V2D6;G3V5X6;G3V3K6;G3V555;G3V575;B4DSU6;P0DMR1;B7ZW38;A0A0G2JPF8;A0A0G2JNQ3;O60812;B2RXH8;G3V4M8;G3V5V7;G3V2H6	G3V4W0;B4DY08;B2R5W2;G3V4C1;G3V576;G3V2Q1;P07910;G3V251;G3V2D6;G3V5X6;G3V3K6	Heterogeneous nuclear ribonucleoproteins C1/C2	HNRNPC	>tr|G3V4W0|G3V4W0_HUMAN Heterogeneous nuclear ribonucleoproteins C1/C2 (Fragment) OS=Homo sapiens GN=HNRNPC PE=1 SV=1;>tr|B4DY08|B4DY08_HUMAN Heterogeneous nuclear ribonucleoproteins C1/C2 OS=Homo sapiens GN=HNRNPC PE=1 SV=1;>tr|B2R5W2|B2R5W2_HUMAN Heterog	ENSG00000092199	ENSP00000319690;ENSP00000338095;ENSP00000404559;ENSP00000404848;ENSP00000442816;ENSP00000450467;ENSP00000450544;ENSP00000450548;ENSP00000450601;ENSP00000450629;ENSP00000450725;ENSP00000450790;ENSP00000451176;ENSP00000451187;ENSP00000451291;ENSP00000451292;ENSP00000451652;ENSP00000451708;ENSP00000452021;ENSP00000452214;ENSP00000452276;ENSP00000452573	B2R5W2_HUMAN;B4DY08_HUMAN;G3V251_HUMAN;G3V2D6_HUMAN;G3V2Q1_HUMAN;G3V3K6_HUMAN;G3V4C1_HUMAN;G3V4W0_HUMAN;G3V576_HUMAN;G3V5X6_HUMAN;HNRPC_HUMAN	Not Sig	logFC < 2.0	UNCERTAIN
399	26.0362	25.9005	25.9065	26.0665	26.2066	26.0515	26.1019	26.2702	NA	NA	NA	NA	NA	480	1.47351	0.611142	0.18011	0.0871922	B3KS98;O15372;A0A087WZK9;E5RJT0;E5RGU4;E5RFW7;E5RFH0;E5RHC7;E5RH59	B3KS98;O15372;A0A087WZK9;E5RJT0	Eukaryotic translation initiation factor 3 subunit H	EIF3S3;EIF3H	>tr|B3KS98|B3KS98_HUMAN Eukaryotic translation initiation factor 3 subunit H OS=Homo sapiens GN=EIF3H PE=1 SV=1;>sp|O15372|EIF3H_HUMAN Eukaryotic translation initiation factor 3 subunit H OS=Homo sapiens GN=EIF3H PE=1 SV=1;>tr|A0A087WZK9|A0A087WZK9_HUMAN E	ENSG00000147677	ENSP00000276682;ENSP00000428195;ENSP00000429931	B3KS98_HUMAN;E5RJT0_HUMAN;EIF3H_HUMAN	Not Sig	logFC < 2.0	UNCERTAIN
400	24.7222	24.4775	23.9828	24.4527	23.7474	24.0687	24.2268	24.2866	NA	NA	NA	NA	NA	481	0.832558	0.417582	-0.326408	-0.148632	H0YMJ0;H0YLJ3;B3KTM8;Q9UBU8;H0YM21;H0YLV1;H0YMT8;H0YNE0;H0YNI8;H0YNX3	H0YMJ0;H0YLJ3;B3KTM8;Q9UBU8;H0YM21;H0YLV1;H0YMT8;H0YNE0	Mortality factor 4-like protein 1	MORF4L1	>tr|H0YMJ0|H0YMJ0_HUMAN Mortality factor 4-like protein 1 (Fragment) OS=Homo sapiens GN=MORF4L1 PE=1 SV=1;>tr|H0YLJ3|H0YLJ3_HUMAN Mortality factor 4-like protein 1 OS=Homo sapiens GN=MORF4L1 PE=1 SV=1;>tr|B3KTM8|B3KTM8_HUMAN Mortality factor 4-like protein	ENSG00000185787	ENSP00000331310;ENSP00000368850;ENSP00000408880;ENSP00000452717;ENSP00000452808;ENSP00000453231;ENSP00000453351;ENSP00000453432;ENSP00000453625;ENSP00000453738;ENSP00000453972	B3KTM8_HUMAN;H0YLJ3_HUMAN;H0YLV1_HUMAN;H0YM21_HUMAN;H0YMJ0_HUMAN;H0YMT8_HUMAN;H0YNE0_HUMAN;MO4L1_HUMAN	Not Sig	logFC < 2.0	UNCERTAIN
401	21.1842	21.3654	21.34	21.3726	21.176	21.3994	20.783	21.5538	NA	NA	NA	NA	NA	483	0.19969	0.807145	-0.0874915	-0.0402599	B3KVZ3;Q9H3R5;D6RBJ6;H0Y9E6	B3KVZ3;Q9H3R5	Centromere protein H	CENPH	>tr|B3KVZ3|B3KVZ3_HUMAN Centromere protein H OS=Homo sapiens GN=CENPH PE=1 SV=1;>sp|Q9H3R5|CENPH_HUMAN Centromere protein H OS=Homo sapiens GN=CENPH PE=1 SV=1	ENSG00000153044	ENSP00000283006;ENSP00000426014	B3KVZ3_HUMAN;CENPH_HUMAN	Not Sig	logFC < 2.0	UNCERTAIN
402	22.4646	22.3759	22.4578	22.2942	23.183	22.4242	22.5027	22.2591	NA	NA	NA	NA	NA	487	0.414469	0.610462	0.194149	0.0879588	H3BRY6;B4DVT3;B4DJL6;Q96SY0	H3BRY6;B4DVT3;B4DJL6;Q96SY0	von Willebrand factor A domain-containing protein 9	VWA9	>tr|H3BRY6|H3BRY6_HUMAN von Willebrand factor A domain-containing protein 9 OS=Homo sapiens GN=VWA9 PE=1 SV=1;>tr|B4DVT3|B4DVT3_HUMAN cDNA FLJ50705 OS=Homo sapiens GN=VWA9 PE=1 SV=1;>tr|B4DJL6|B4DJL6_HUMAN cDNA FLJ55475 OS=Homo sapiens GN=VWA9 PE=1 SV=1;>s	ENSG00000138614	ENSP00000326379;ENSP00000379006;ENSP00000396314;ENSP00000402898;ENSP00000408429;ENSP00000456460;ENSP00000457624	B4DJL6_HUMAN;B4DVT3_HUMAN;H3BRY6_HUMAN;VWA9_HUMAN	Not Sig	logFC < 2.0	UNCERTAIN
403	28.0795	28.202	28.0833	28.1969	28.2134	28.1165	28.2458	28.1644	NA	NA	NA	NA	NA	488	0.452163	0.896308	0.044611	0.0218219	B4DJV2;O75390;A0A0C4DGI3;H0YH82;F8VPF9;F8VPA1;F8W1S4;F8VRP1;F8VX68;F8VRI6;F8W4S1;H0YIC4;F8VR34;F8VTT8;F8VZK9;F8VX07;F8VWQ5;F8W642;F8VU34;F8W0J2	B4DJV2;O75390;A0A0C4DGI3;H0YH82	Citrate synthase;Citrate synthase, mitochondrial	CS	>tr|B4DJV2|B4DJV2_HUMAN Citrate synthase OS=Homo sapiens GN=CS PE=1 SV=1;>sp|O75390|CISY_HUMAN Citrate synthase, mitochondrial OS=Homo sapiens GN=CS PE=1 SV=2;>tr|A0A0C4DGI3|A0A0C4DGI3_HUMAN Citrate synthase OS=Homo sapiens GN=CS PE=1 SV=1;>tr|H0YH82|H0YH8	ENSG00000062485	ENSP00000342056;ENSP00000440543;ENSP00000446492;ENSP00000446779	B4DJV2_HUMAN;CISY_HUMAN;H0YH82_HUMAN	Not Sig	logFC < 2.0	UNCERTAIN
404	23.5008	23.7624	23.3142	23.5636	22.4964	22.4396	22.3593	22.4703	NA	NA	NA	NA	NA	489	4.53483	0.0417399	-1.09386	-0.521613	B4DKB2;P42892	B4DKB2;P42892	Endothelin-converting enzyme 1	ECE1	>tr|B4DKB2|B4DKB2_HUMAN Endothelin-converting enzyme 1 OS=Homo sapiens GN=ECE1 PE=1 SV=1;>sp|P42892|ECE1_HUMAN Endothelin-converting enzyme 1 OS=Homo sapiens GN=ECE1 PE=1 SV=2	ENSG00000117298	ENSP00000264205;ENSP00000349581;ENSP00000364028;ENSP00000388439;ENSP00000405088	B4DKB2_HUMAN;ECE1_HUMAN	Not Sig	logFC < 2.0	UNCERTAIN
405	25.5321	25.6056	25.5138	25.5193	25.6171	25.3005	25.2105	25.4138	NA	NA	NA	NA	NA	490	0.878849	0.655534	-0.157198	-0.0752056	B4DKY1;P49589;C9JLN0;E9PRS8;E9PLP0	B4DKY1;P49589	Cysteine--tRNA ligase, cytoplasmic	CARS	>tr|B4DKY1|B4DKY1_HUMAN Cysteine--tRNA ligase, cytoplasmic OS=Homo sapiens GN=CARS PE=1 SV=1;>sp|P49589|SYCC_HUMAN Cysteine--tRNA ligase, cytoplasmic OS=Homo sapiens GN=CARS PE=1 SV=3	ENSG00000110619	ENSP00000278224;ENSP00000369897;ENSP00000380300;ENSP00000384069	B4DKY1_HUMAN;SYCC_HUMAN	Not Sig	logFC < 2.0	UNCERTAIN
406	27.1588	27.1252	26.9859	27.0582	26.7317	27.2656	27.1473	27.5951	NA	NA	NA	NA	NA	491	0.226957	0.775703	0.102918	0.0471588	B4DLN1;P52815;Q9UBX3;F6QW41;I3L1E8;F6RGN5	B4DLN1;P52815	39S ribosomal protein L12, mitochondrial	MRPL12	>tr|B4DLN1|B4DLN1_HUMAN Uncharacterized protein OS=Homo sapiens PE=2 SV=1;>sp|P52815|RM12_HUMAN 39S ribosomal protein L12, mitochondrial OS=Homo sapiens GN=MRPL12 PE=1 SV=2	ENSG00000183048;ENSG00000262660;ENSG00000262814	ENSP00000333837;ENSP00000439565;ENSP00000461324	B4DLN1_HUMAN;RM12_HUMAN	Not Sig	logFC < 2.0	UNCERTAIN
407	26.9781	26.844	26.6338	26.8625	25.8092	26.2048	26.047	26.1978	NA	NA	NA	NA	NA	492	3.21094	0.122341	-0.764921	-0.361303	B4DLR8;P15559;H3BRK3;H3BNV2	B4DLR8;P15559;H3BRK3;H3BNV2	NAD(P)H dehydrogenase [quinone] 1	NQO1	>tr|B4DLR8|B4DLR8_HUMAN NAD(P)H dehydrogenase [quinone] 1 OS=Homo sapiens GN=NQO1 PE=1 SV=1;>sp|P15559|NQO1_HUMAN NAD(P)H dehydrogenase [quinone] 1 OS=Homo sapiens GN=NQO1 PE=1 SV=1;>tr|H3BRK3|H3BRK3_HUMAN NAD(P)H dehydrogenase [quinone] 1 OS=Homo sapiens	ENSG00000181019	ENSP00000319788;ENSP00000368334;ENSP00000368335;ENSP00000398330;ENSP00000455020;ENSP00000456282	B4DLR8_HUMAN;H3BNV2_HUMAN;H3BRK3_HUMAN;NQO1_HUMAN	Not Sig	logFC < 2.0	UNCERTAIN
408	22.4936	22.1197	21.3035	22.477	20.1528	22.5283	22.1962	22.5374	NA	NA	NA	NA	NA	493	0.146365	0.586518	-0.244789	-0.0928388	Q49AI2;B4DML3;Q86WA6	Q49AI2;B4DML3;Q86WA6	Valacyclovir hydrolase	BPHL	>tr|Q49AI2|Q49AI2_HUMAN BPHL protein OS=Homo sapiens GN=BPHL PE=1 SV=1;>tr|B4DML3|B4DML3_HUMAN Valacyclovir hydrolase OS=Homo sapiens GN=BPHL PE=1 SV=1;>sp|Q86WA6|BPHL_HUMAN Valacyclovir hydrolase OS=Homo sapiens GN=BPHL PE=1 SV=1	ENSG00000137274	ENSP00000369726;ENSP00000369734;ENSP00000369739;ENSP00000390472;ENSP00000413762	B4DML3_HUMAN;BPHL_HUMAN;Q49AI2_HUMAN	Not Sig	logFC < 2.0	UNCERTAIN
409	23.1532	23.1604	23.3861	22.7166	23.5153	23.0009	22.8899	22.864	NA	NA	NA	NA	NA	494	0.0627136	0.927935	-0.0365481	-0.0165615	B4DP61;E7EQZ4;Q16637;H0YBZ9;A0A0G2JRX5;A0A0G2JRY6	B4DP61;E7EQZ4;Q16637;H0YBZ9;A0A0G2JRX5;A0A0G2JRY6	Survival motor neuron protein	SMN1	>tr|B4DP61|B4DP61_HUMAN Survival motor neuron protein OS=Homo sapiens GN=SMN2 PE=1 SV=1;>tr|E7EQZ4|E7EQZ4_HUMAN Survival motor neuron protein OS=Homo sapiens GN=SMN1 PE=1 SV=1;>sp|Q16637|SMN_HUMAN Survival motor neuron protein OS=Homo sapiens GN=SMN1 PE=1	ENSG00000172062;ENSG00000205571;ENSG00000262170	ENSP00000305857;ENSP00000370083;ENSP00000370117;ENSP00000370118;ENSP00000370119;ENSP00000422679;ENSP00000423298;ENSP00000424282;ENSP00000424799;ENSP00000424926;ENSP00000428128;ENSP00000430657;ENSP00000459033	B4DP61_HUMAN;E7EQZ4_HUMAN;H0YBZ9_HUMAN;SMN_HUMAN	Not Sig	logFC < 2.0	UNCERTAIN
410	22.6614	21.1574	22.3908	22.5293	20.8172	20.981	22.3087	21.572	NA	NA	NA	NA	NA	495	0.782036	0.177215	-0.76498	-0.307943	B4DQA8;Q96QI9;K7EJC8;E9PCW1;O95249;F6RU00;G5E9T8;A0A087WYX5	B4DQA8;Q96QI9;K7EJC8;E9PCW1;O95249;F6RU00;G5E9T8;A0A087WYX5	Golgi SNAP receptor complex member 1	GOSR1	>tr|B4DQA8|B4DQA8_HUMAN Golgi SNAP receptor complex member 1 OS=Homo sapiens GN=GOSR1 PE=1 SV=1;>tr|Q96QI9|Q96QI9_HUMAN GOSR1 protein OS=Homo sapiens GN=GOSR1 PE=1 SV=1;>tr|K7EJC8|K7EJC8_HUMAN Golgi SNAP receptor complex member 1 OS=Homo sapiens GN=GOSR1 P	ENSG00000108587	ENSP00000225724;ENSP00000396977;ENSP00000414441;ENSP00000414956;ENSP00000438330;ENSP00000465115	B4DQA8_HUMAN;E9PCW1_HUMAN;F6RU00_HUMAN;G5E9T8_HUMAN;GOSR1_HUMAN;K7EJC8_HUMAN;Q96QI9_HUMAN	Not Sig	logFC < 2.0	UNCERTAIN
411	23.3477	23.8449	24.3056	23.6311	23.8304	23.5168	23.268	23.2128	NA	NA	NA	NA	NA	497	0.629676	0.425558	-0.325356	-0.144843	B4DR61;P61619;F8W776;Q8TC24;Q9H9S3;H7C1Q9;C9JXC6;H7C069;A6NK38;F2Z2C7;A6NIF9;C9JJV4	B4DR61;P61619	Protein transport protein Sec61 subunit alpha isoform 1	SEC61A1	>tr|B4DR61|B4DR61_HUMAN Protein transport protein Sec61 subunit alpha isoform 1 OS=Homo sapiens GN=SEC61A1 PE=1 SV=1;>sp|P61619|S61A1_HUMAN Protein transport protein Sec61 subunit alpha isoform 1 OS=Homo sapiens GN=SEC61A1 PE=1 SV=2	ENSG00000058262	ENSP00000243253;ENSP00000411445;ENSP00000418493	B4DR61_HUMAN;S61A1_HUMAN	Not Sig	logFC < 2.0	UNCERTAIN
412	25.01	25.0419	24.8311	24.7082	25.2846	24.6916	25.0324	24.9145	NA	NA	NA	NA	NA	498	0.228328	0.817208	0.0829659	0.038656	B4DR80;Q9Y6E0;H0Y630;Q5JV98;Q5JV99	B4DR80;Q9Y6E0;H0Y630	Serine/threonine-protein kinase 24;Serine/threonine-protein kinase 24 36 kDa subunit;Serine/threonine-protein kinase 24 12 kDa subunit	STK24	>tr|B4DR80|B4DR80_HUMAN Serine/threonine-protein kinase 24 OS=Homo sapiens GN=STK24 PE=1 SV=1;>sp|Q9Y6E0|STK24_HUMAN Serine/threonine-protein kinase 24 OS=Homo sapiens GN=STK24 PE=1 SV=1;>tr|H0Y630|H0Y630_HUMAN Serine/threonine-protein kinase 24 (Fragment)	ENSG00000102572	ENSP00000365730;ENSP00000380651;ENSP00000402764;ENSP00000442539	B4DR80_HUMAN;H0Y630_HUMAN;STK24_HUMAN	Not Sig	logFC < 2.0	UNCERTAIN
413	21.8388	21.4375	21.4856	21.4013	21.3405	21.6541	21.2866	21.6578	NA	NA	NA	NA	NA	502	0.151199	0.874768	-0.0560508	-0.0261719	B4DUA7;Q9NX70;M0R3F3	B4DUA7;Q9NX70;M0R3F3	Mediator of RNA polymerase II transcription subunit 29	IXL;MED29	>tr|B4DUA7|B4DUA7_HUMAN Intersex-like (Drosophila) OS=Homo sapiens GN=IXL PE=1 SV=1;>sp|Q9NX70|MED29_HUMAN Mediator of RNA polymerase II transcription subunit 29 OS=Homo sapiens GN=MED29 PE=1 SV=1;>tr|M0R3F3|M0R3F3_HUMAN Mediator of RNA polymerase II trans	ENSG00000063322	ENSP00000314343;ENSP00000473181	B4DUA7_HUMAN;M0R3F3_HUMAN;MED29_HUMAN	Not Sig	logFC < 2.0	UNCERTAIN
414	26.8676	26.7714	26.6136	26.9751	27.0097	26.9855	26.9922	27.3372	NA	NA	NA	NA	NA	503	1.26575	0.471229	0.274226	0.129666	B4DUC8;Q13126;J3QSB7;F2Z2F3;F8WES2;J3KRN1	B4DUC8;Q13126;J3QSB7	S-methyl-5-thioadenosine phosphorylase;Purine nucleoside phosphorylase	MTAP	>tr|B4DUC8|B4DUC8_HUMAN S-methyl-5-thioadenosine phosphorylase OS=Homo sapiens GN=MTAP PE=1 SV=1;>sp|Q13126|MTAP_HUMAN S-methyl-5-thioadenosine phosphorylase OS=Homo sapiens GN=MTAP PE=1 SV=2;>tr|J3QSB7|J3QSB7_HUMAN S-methyl-5-thioadenosine phosphorylas	ENSG00000099810	ENSP00000369519;ENSP00000461932;ENSP00000463424;ENSP00000464616	B4DUC8_HUMAN;J3QSB7_HUMAN;MTAP_HUMAN	Not Sig	logFC < 2.0	UNCERTAIN
415	27.0033	27.0812	26.6044	26.9801	26.3243	26.7184	26.6359	26.5905	NA	NA	NA	NA	NA	504	1.37094	0.388184	-0.349971	-0.163814	B4DUT8;Q99439;B4DDF4;A0A087X271;A0A087X1X5;H3BVI6;K7ES69;H3BQH0;A0A087WV51;U3KPS3	B4DUT8;Q99439;B4DDF4;A0A087X271;A0A087X1X5;H3BVI6;K7ES69	Calponin-2	CNN2	>tr|B4DUT8|B4DUT8_HUMAN Calponin OS=Homo sapiens GN=CNN2 PE=1 SV=1;>sp|Q99439|CNN2_HUMAN Calponin-2 OS=Homo sapiens GN=CNN2 PE=1 SV=4;>tr|B4DDF4|B4DDF4_HUMAN Calponin OS=Homo sapiens GN=CNN2 PE=1 SV=1;>tr|A0A087X271|A0A087X271_HUMAN Calponin (Fragment) OS=	ENSG00000064666	ENSP00000263097;ENSP00000340129;ENSP00000456436;ENSP00000457968;ENSP00000458137;ENSP00000468577	B4DDF4_HUMAN;B4DUT8_HUMAN;CNN2_HUMAN;H3BVI6_HUMAN;K7ES69_HUMAN	Not Sig	logFC < 2.0	UNCERTAIN
416	26.454	26.4826	26.5855	26.4504	26.773	26.6816	26.6484	26.6629	NA	NA	NA	NA	NA	507	2.4759	0.570268	0.198388	0.0971415	B4DXZ6;P51114;E9PFF5;E7EU85;H7C4S4;C9JAJ4;C9JZE0;C9JY20;C9IZ22	B4DXZ6;P51114;E9PFF5;E7EU85	Fragile X mental retardation syndrome-related protein 1	FXR1	>tr|B4DXZ6|B4DXZ6_HUMAN Fragile X mental retardation syndrome-related protein 1 OS=Homo sapiens GN=FXR1 PE=1 SV=1;>sp|P51114|FXR1_HUMAN Fragile X mental retardation syndrome-related protein 1 OS=Homo sapiens GN=FXR1 PE=1 SV=3;>tr|E9PFF5|E9PFF5_HUMAN Fragil	ENSG00000114416	ENSP00000307633;ENSP00000350170;ENSP00000388828;ENSP00000418097;ENSP00000420515;ENSP00000420643	B4DXZ6_HUMAN;E7EU85_HUMAN;E9PFF5_HUMAN;FXR1_HUMAN	Not Sig	logFC < 2.0	UNCERTAIN
417	20.7715	21.5194	21.1442	20.9372	21.6852	20.6459	21.5473	20.1045	NA	NA	NA	NA	NA	508	0.086274	0.807112	-0.0973439	-0.040407	B4DYY6;Q75T13;A6NI33	B4DYY6;Q75T13;A6NI33	GPI inositol-deacylase	PGAP1	>tr|B4DYY6|B4DYY6_HUMAN GPI inositol-deacylase OS=Homo sapiens GN=PGAP1 PE=1 SV=1;>sp|Q75T13|PGAP1_HUMAN GPI inositol-deacylase OS=Homo sapiens GN=PGAP1 PE=1 SV=1;>tr|A6NI33|A6NI33_HUMAN GPI inositol-deacylase (Fragment) OS=Homo sapiens GN=PGAP1 PE=1 SV=2	ENSG00000197121	ENSP00000346809;ENSP00000363870;ENSP00000386802;ENSP00000387028	A6NI33_HUMAN;B4DYY6_HUMAN;PGAP1_HUMAN	Not Sig	logFC < 2.0	UNCERTAIN
418	25.4938	25.3581	25.6331	25.2104	25.857	25.176	25.1197	24.8438	NA	NA	NA	NA	NA	510	0.316351	0.641408	-0.174714	-0.0782229	B4DZG7;P40616;F8VYN9;F8W1Z8	B4DZG7;P40616;F8VYN9	ADP-ribosylation factor-like protein 1	ARL1	>tr|B4DZG7|B4DZG7_HUMAN ADP-ribosylation factor-like protein 1 OS=Homo sapiens GN=ARL1 PE=1 SV=1;>sp|P40616|ARL1_HUMAN ADP-ribosylation factor-like protein 1 OS=Homo sapiens GN=ARL1 PE=1 SV=1;>tr|F8VYN9|F8VYN9_HUMAN ADP-ribosylation factor-like protein 1 O	ENSG00000120805	ENSP00000261636;ENSP00000439590;ENSP00000448912	ARL1_HUMAN;B4DZG7_HUMAN;F8VYN9_HUMAN	Not Sig	logFC < 2.0	UNCERTAIN
419	23.3921	23.4371	23.3968	23.3321	22.9961	23.1663	23.0865	23.1453	NA	NA	NA	NA	NA	511	3.25038	0.429692	-0.290958	-0.142361	B4E0T2;P50542;J3KPV0;F5H432;F5GXX3;F5H205;F5H637;F5H3X7;H0YGT8;F5GZ41;F5H0L9;F5GYB4;F5H5C0	B4E0T2;P50542;J3KPV0	Peroxisomal targeting signal 1 receptor	PEX5	>tr|B4E0T2|B4E0T2_HUMAN Peroxisomal targeting signal 1 receptor OS=Homo sapiens GN=PEX5 PE=1 SV=1;>sp|P50542|PEX5_HUMAN Peroxisomal targeting signal 1 receptor OS=Homo sapiens GN=PEX5 PE=1 SV=3;>tr|J3KPV0|J3KPV0_HUMAN Peroxisomal targeting signal 1 recepto	ENSG00000139197	ENSP00000266563;ENSP00000266564;ENSP00000379877;ENSP00000391601;ENSP00000400647;ENSP00000407401;ENSP00000410159	B4E0T2_HUMAN;J3KPV0_HUMAN;PEX5_HUMAN	Not Sig	logFC < 2.0	UNCERTAIN
420	25.3528	25.5238	25.3992	25.3883	26.2453	25.9982	26.0852	25.7355	NA	NA	NA	NA	NA	512	2.74324	0.200868	0.600051	0.283991	Q8NBY1;B4E0Y9;Q9P289;C9JJV0;E0TL11;E0TL13	Q8NBY1;B4E0Y9;Q9P289	Serine/threonine-protein kinase MST4	RBM4B;MST4	>tr|Q8NBY1|Q8NBY1_HUMAN Serine/threonine-protein kinase 26 OS=Homo sapiens GN=STK26 PE=1 SV=1;>tr|B4E0Y9|B4E0Y9_HUMAN Serine/threonine-protein kinase 26 OS=Homo sapiens GN=STK26 PE=1 SV=1;>sp|Q9P289|STK26_HUMAN Serine/threonine-protein kinase 26 OS=Homo sa	ENSG00000134602	ENSP00000346755;ENSP00000418753	B4E0Y9_HUMAN;MST4_HUMAN;Q8NBY1_HUMAN	Not Sig	logFC < 2.0	UNCERTAIN
421	21.3132	21.9123	21.6356	22.0788	21.5584	21.0409	21.5347	20.5304	NA	NA	NA	NA	NA	514	0.989624	0.238918	-0.568875	-0.247836	B4E2Q0;P98194;D6RGE9;D6REJ1;D6RHV9;H0Y9S7;H0Y9V7	B4E2Q0;P98194;D6RGE9;D6REJ1;D6RHV9;H0Y9S7;H0Y9V7	Calcium-transporting ATPase;Calcium-transporting ATPase type 2C member 1	ATP2C1	>tr|B4E2Q0|B4E2Q0_HUMAN Calcium-transporting ATPase OS=Homo sapiens GN=ATP2C1 PE=1 SV=1;>sp|P98194|AT2C1_HUMAN Calcium-transporting ATPase type 2C member 1 OS=Homo sapiens GN=ATP2C1 PE=1 SV=3;>tr|D6RGE9|D6RGE9_HUMAN Calcium-transporting ATPase type 2C memb	ENSG00000017260	ENSP00000329664;ENSP00000352665;ENSP00000376914;ENSP00000395809;ENSP00000402677;ENSP00000421261;ENSP00000421326;ENSP00000422872;ENSP00000423330;ENSP00000423774;ENSP00000424783;ENSP00000424930;ENSP00000425228;ENSP00000426849;ENSP00000427461;ENSP00000427625	AT2C1_HUMAN;B4E2Q0_HUMAN;D6REJ1_HUMAN;D6RGE9_HUMAN;D6RHV9_HUMAN;H0Y9S7_HUMAN;H0Y9V7_HUMAN	Not Sig	logFC < 2.0	UNCERTAIN
422	24.9557	24.9498	25.4302	24.7343	25.1572	24.7205	24.8511	24.6924	NA	NA	NA	NA	NA	517	0.39191	0.656895	-0.162212	-0.0743623	B5MBZ0;Q9HC35	B5MBZ0;Q9HC35	Echinoderm microtubule-associated protein-like 4	EML4	>tr|B5MBZ0|B5MBZ0_HUMAN Echinoderm microtubule-associated protein-like 4 OS=Homo sapiens GN=EML4 PE=1 SV=3;>sp|Q9HC35|EMAL4_HUMAN Echinoderm microtubule-associated protein-like 4 OS=Homo sapiens GN=EML4 PE=1 SV=3	ENSG00000143924	ENSP00000320663;ENSP00000384939	B5MBZ0_HUMAN;EMAL4_HUMAN	Not Sig	logFC < 2.0	UNCERTAIN
423	24.0791	24.4628	24.8585	24.1903	24.4686	24.1841	24.0339	23.5207	NA	NA	NA	NA	NA	521	0.623969	0.407589	-0.345838	-0.152773	B5MCF9;O00541;B3KXD6;H7C267	B5MCF9;O00541;B3KXD6	Pescadillo homolog	PES1	>tr|B5MCF9|B5MCF9_HUMAN Pescadillo homolog OS=Homo sapiens GN=PES1 PE=1 SV=1;>sp|O00541|PESC_HUMAN Pescadillo homolog OS=Homo sapiens GN=PES1 PE=1 SV=1;>tr|B3KXD6|B3KXD6_HUMAN Pescadillo homolog OS=Homo sapiens GN=PES1 PE=1 SV=1	ENSG00000100029	ENSP00000334612;ENSP00000346725;ENSP00000384252;ENSP00000384366;ENSP00000385654	B3KXD6_HUMAN;B5MCF9_HUMAN;PESC_HUMAN	Not Sig	logFC < 2.0	UNCERTAIN
424	22.2277	22.2574	22.5201	22.2003	21.2116	20.7766	20.0749	20.7803	NA	NA	NA	NA	NA	522	3.18174	0.0137273	-1.59052	-0.707963	B5MCW3;F8WDX5;D6RID0;F8WCS7;F8WBH2;C9JV05;H7C128;H7C179;H7C127;Q9H0E9	B5MCW3;F8WDX5;D6RID0;F8WCS7;F8WBH2;C9JV05;H7C128;H7C179;H7C127;Q9H0E9	Bromodomain-containing protein 8	BRD8	>tr|B5MCW3|B5MCW3_HUMAN Bromodomain-containing protein 8 OS=Homo sapiens GN=BRD8 PE=1 SV=1;>tr|F8WDX5|F8WDX5_HUMAN Bromodomain-containing protein 8 OS=Homo sapiens GN=BRD8 PE=1 SV=1;>tr|D6RID0|D6RID0_HUMAN Bromodomain-containing protein 8 OS=Homo sapiens G	ENSG00000112983	ENSP00000230901;ENSP00000254900;ENSP00000384845;ENSP00000394330;ENSP00000396487;ENSP00000398067;ENSP00000398084;ENSP00000398676;ENSP00000398873;ENSP00000407414;ENSP00000414625;ENSP00000427475	B5MCW3_HUMAN;BRD8_HUMAN;C9JV05_HUMAN;D6RID0_HUMAN;F8WBH2_HUMAN;F8WCS7_HUMAN;F8WDX5_HUMAN;H7C127_HUMAN;H7C128_HUMAN;H7C179_HUMAN	Not Sig	logFC < 2.0	UNCERTAIN
425	24.2719	24.1414	23.8547	23.7944	23.8449	24.0131	24.0508	24.0592	NA	NA	NA	NA	NA	523	0.0675566	0.95824	-0.0236163	-0.0111156	B5MD00;Q9P0U1	B5MD00;Q9P0U1	Mitochondrial import receptor subunit TOM7 homolog	TOMM7	>tr|B5MD00|B5MD00_HUMAN Mitochondrial import receptor subunit TOM7 homolog OS=Homo sapiens GN=TOMM7 PE=1 SV=1;>sp|Q9P0U1|TOM7_HUMAN Mitochondrial import receptor subunit TOM7 homolog OS=Homo sapiens GN=TOMM7 PE=1 SV=1	ENSG00000196683	ENSP00000351214;ENSP00000385203	B5MD00_HUMAN;TOM7_HUMAN	Not Sig	logFC < 2.0	UNCERTAIN
426	29.4704	29.2418	29.1221	29.3359	29.4006	29.5296	29.374	29.7513	NA	NA	NA	NA	NA	524	1.0056	0.545257	0.221302	0.104717	B5MDF5;P62826;F5H018;J3KQE5;H0YFC6;B4DV51;A0A087X0W0	B5MDF5;P62826;F5H018;J3KQE5;H0YFC6	GTP-binding nuclear protein Ran	RAN	>tr|B5MDF5|B5MDF5_HUMAN GTP-binding nuclear protein Ran OS=Homo sapiens GN=RAN PE=1 SV=1;>sp|P62826|RAN_HUMAN GTP-binding nuclear protein Ran OS=Homo sapiens GN=RAN PE=1 SV=3;>tr|F5H018|F5H018_HUMAN GTP-binding nuclear protein Ran (Fragment) OS=Homo sapien	ENSG00000132341	ENSP00000376174;ENSP00000376176;ENSP00000396127;ENSP00000437950;ENSP00000444042;ENSP00000446215	B5MDF5_HUMAN;F5H018_HUMAN;H0YFC6_HUMAN;J3KQE5_HUMAN;RAN_HUMAN	Not Sig	logFC < 2.0	UNCERTAIN
427	21.7614	21.4369	22.0073	21.3328	21.7158	21.4707	21.4048	21.5942	NA	NA	NA	NA	NA	526	0.207597	0.806527	-0.0882001	-0.0406679	B5MDQ0;Q2NKX8	B5MDQ0;Q2NKX8	DNA excision repair protein ERCC-6-like	ERCC6L	>tr|B5MDQ0|B5MDQ0_HUMAN DNA excision repair protein ERCC-6-like OS=Homo sapiens GN=ERCC6L PE=1 SV=1;>sp|Q2NKX8|ERC6L_HUMAN DNA excision repair protein ERCC-6-like OS=Homo sapiens GN=ERCC6L PE=1 SV=1	ENSG00000186871	ENSP00000334675;ENSP00000362761	B5MDQ0_HUMAN;ERC6L_HUMAN	Not Sig	logFC < 2.0	UNCERTAIN
428	23.4359	22.9968	23.3242	23.3399	23.5525	23.3885	23.5677	23.2912	NA	NA	NA	NA	NA	527	0.738705	0.6236	0.175792	0.0830523	B5MDU6;Q9H6V9;B5MCE2;B4DRG3;B5MCU4;A0A0A0MSH6;C9JHU6;D3YTH1;C9JUM0	B5MDU6;Q9H6V9;B5MCE2;B4DRG3;B5MCU4;A0A0A0MSH6	UPF0554 protein C2orf43	C2orf43;FLJ21820	>tr|B5MDU6|B5MDU6_HUMAN Lipid droplet-associated hydrolase OS=Homo sapiens GN=LDAH PE=1 SV=1;>sp|Q9H6V9|LDAH_HUMAN Lipid droplet-associated hydrolase OS=Homo sapiens GN=LDAH PE=1 SV=1;>tr|B5MCE2|B5MCE2_HUMAN Lipid droplet-associated hydrolase (Fragment) OS	ENSG00000118961	ENSP00000237822;ENSP00000370480;ENSP00000384267;ENSP00000385951;ENSP00000400340	B4DRG3_HUMAN;B5MCE2_HUMAN;B5MCU4_HUMAN;B5MDU6_HUMAN;CB043_HUMAN	Not Sig	logFC < 2.0	UNCERTAIN
429	27.3205	27.6171	28.2598	27.4118	27.7333	27.4336	27.2495	26.811	NA	NA	NA	NA	NA	528	0.56317	0.413332	-0.345403	-0.151059	B5ME19;H3BPE3;H3BPE4;H3BTY8	B5ME19	Eukaryotic translation initiation factor 3 subunit C-like protein	EIF3CL	>sp|B5ME19|EIFCL_HUMAN Eukaryotic translation initiation factor 3 subunit C-like protein OS=Homo sapiens GN=EIF3CL PE=3 SV=1	ENSG00000205609	ENSP00000370258;ENSP00000381916;ENSP00000381917	B5ME19_HUMAN	Not Sig	logFC < 2.0	UNCERTAIN
430	24.7512	24.2852	24.4198	24.4927	25.364	25.4939	25.5062	25.5291	NA	NA	NA	NA	NA	529	4.08823	0.0565673	0.986109	0.468517	E7EW69;E7EX04;B5ME97;Q9P0V9;F5H1F2;C9JEW2;C9JNR7;F5GYV2;C9JEQ7	E7EW69;E7EX04;B5ME97;Q9P0V9	Septin-10	2016-09-10	>tr|E7EW69|E7EW69_HUMAN Septin-10 OS=Homo sapiens GN=SEPT10 PE=1 SV=1;>tr|E7EX04|E7EX04_HUMAN Septin-10 OS=Homo sapiens GN=SEPT10 PE=1 SV=1;>tr|B5ME97|B5ME97_HUMAN Septin 10, isoform CRA_c OS=Homo sapiens GN=SEPT10 PE=1 SV=2;>sp|Q9P0V9|SEP10_HUMAN Septin-1	ENSG00000186522	ENSP00000349116;ENSP00000380824;ENSP00000380826;ENSP00000396728;ENSP00000407790	B5ME97_HUMAN;E7EW69_HUMAN;E7EX04_HUMAN;SEP10_HUMAN	Not Sig	logFC < 2.0	UNCERTAIN
431	22.6862	22.946	22.8911	20.9075	22.8704	22.7419	22.9377	21.7156	NA	NA	NA	NA	NA	530	0.140027	0.630324	0.208696	0.0813728	E7EST9;B5MEG5	E7EST9;B5MEG5	Ubiquitin carboxyl-terminal hydrolase	USP19	>tr|E7EST9|E7EST9_HUMAN Ubiquitin carboxyl-terminal hydrolase 19 OS=Homo sapiens GN=USP19 PE=1 SV=1;>tr|B5MEG5|B5MEG5_HUMAN Ubiquitin carboxyl-terminal hydrolase 19 OS=Homo sapiens GN=USP19 PE=1 SV=1	ENSG00000172046	ENSP00000381867;ENSP00000381872	B5MEG5_HUMAN;E7EST9_HUMAN	Not Sig	logFC < 2.0	UNCERTAIN
432	21.8469	21.7835	21.7685	21.8243	22.2436	21.5403	22.0665	21.7678	NA	NA	NA	NA	NA	536	0.257221	0.782615	0.0987234	0.0457652	G5E9V7;G5E9V6;B7Z637;Q8IUR7;C9JBY2;C9J2I1;C9J8P8;C9JAA7	G5E9V7;G5E9V6;B7Z637;Q8IUR7;C9JBY2;C9J2I1	Armadillo repeat-containing protein 8	ARMC8	>tr|G5E9V7|G5E9V7_HUMAN Armadillo repeat containing 8, isoform CRA_d OS=Homo sapiens GN=ARMC8 PE=1 SV=1;>tr|G5E9V6|G5E9V6_HUMAN Armadillo repeat containing 8, isoform CRA_e OS=Homo sapiens GN=ARMC8 PE=1 SV=1;>tr|B7Z637|B7Z637_HUMAN Armadillo repeat contain	ENSG00000114098	ENSP00000351221;ENSP00000417049;ENSP00000417304;ENSP00000417403;ENSP00000418405;ENSP00000418412;ENSP00000419413;ENSP00000420333;ENSP00000420440;ENSP00000420706;ENSP00000420719;ENSP00000441592	ARMC8_HUMAN;B7Z637_HUMAN;C9J2I1_HUMAN;C9JBY2_HUMAN;G5E9V6_HUMAN;G5E9V7_HUMAN	Not Sig	logFC < 2.0	UNCERTAIN
433	23.7203	23.9606	24.1158	23.3988	24.0932	23.5623	23.7093	23.593	NA	NA	NA	NA	NA	538	0.110979	0.870743	-0.059422	-0.0270314	B7Z6D5;Q96GQ7;A0A087X059;A0A087WYH5	B7Z6D5;Q96GQ7	Probable ATP-dependent RNA helicase DDX27	DDX27	>tr|B7Z6D5|B7Z6D5_HUMAN Probable ATP-dependent RNA helicase DDX27 OS=Homo sapiens GN=DDX27 PE=1 SV=1;>sp|Q96GQ7|DDX27_HUMAN Probable ATP-dependent RNA helicase DDX27 OS=Homo sapiens GN=DDX27 PE=1 SV=2	ENSG00000124228	ENSP00000360828	B7Z6D5_HUMAN;DDX27_HUMAN	Not Sig	logFC < 2.0	UNCERTAIN
434	25.6445	25.4602	25.7301	25.9348	25.4525	25.7275	25.6366	25.8848	NA	NA	NA	NA	NA	539	0.0444767	0.974395	-0.0170403	-0.00798671	B7Z7F3;Q9H6Z4;K7EIJ4;K7EN31;K7ESQ0;K7EMH9;K7ENJ2;K7EID7;K7ENB9;K7EPW1;K7EMT3	B7Z7F3;Q9H6Z4	Ran-binding protein 3	ZNF8;RANBP3	>tr|B7Z7F3|B7Z7F3_HUMAN Ran-binding protein 3 OS=Homo sapiens GN=RANBP3 PE=1 SV=1;>sp|Q9H6Z4|RANB3_HUMAN Ran-binding protein 3 OS=Homo sapiens GN=RANBP3 PE=1 SV=1	ENSG00000031823	ENSP00000034275;ENSP00000341483;ENSP00000404837;ENSP00000465085	B7Z7F3_HUMAN;RANB3_HUMAN	Not Sig	logFC < 2.0	UNCERTAIN
435	21.8265	20.4704	21.2841	20.9582	22.5944	21.6596	21.3026	21.5945	NA	NA	NA	NA	NA	540	0.815025	0.216725	0.652977	0.272153	F8WF16;B7Z8L1;F8W6A0;F8W0Q9;Q8NEY8;F8VPY7;F8VWU8	F8WF16;B7Z8L1;F8W6A0;F8W0Q9;Q8NEY8;F8VPY7;F8VWU8	Periphilin-1	PPHLN1	>tr|F8WF16|F8WF16_HUMAN Periphilin-1 OS=Homo sapiens GN=PPHLN1 PE=1 SV=1;>tr|B7Z8L1|B7Z8L1_HUMAN Periphilin-1 OS=Homo sapiens GN=PPHLN1 PE=1 SV=1;>tr|F8W6A0|F8W6A0_HUMAN Periphilin-1 OS=Homo sapiens GN=PPHLN1 PE=1 SV=1;>tr|F8W0Q9|F8W0Q9_HUMAN Periphilin-1	ENSG00000134283	ENSP00000256678;ENSP00000322048;ENSP00000338510;ENSP00000351066;ENSP00000378935;ENSP00000378947;ENSP00000393965;ENSP00000447168;ENSP00000449331;ENSP00000449772;ENSP00000450274	B7Z8L1_HUMAN;F8VPY7_HUMAN;F8VWU8_HUMAN;F8W0Q9_HUMAN;F8W6A0_HUMAN;F8WF16_HUMAN;PPHLN_HUMAN	Not Sig	logFC < 2.0	UNCERTAIN
436	26.6621	26.6203	26.3766	26.5851	25.9223	26.2702	26.411	26.5526	NA	NA	NA	NA	NA	541	0.926882	0.478739	-0.27198	-0.126544	B7Z9I1;Q5T4U5;P11310;E9PRX4;E9PJM9;H0YDT5	B7Z9I1;Q5T4U5;P11310	Medium-chain specific acyl-CoA dehydrogenase, mitochondrial	ACADM	>tr|B7Z9I1|B7Z9I1_HUMAN Medium-chain-specific acyl-CoA dehydrogenase, mitochondrial OS=Homo sapiens GN=ACADM PE=1 SV=1;>tr|Q5T4U5|Q5T4U5_HUMAN Acyl-Coenzyme A dehydrogenase, C-4 to C-12 straight chain, isoform CRA_a OS=Homo sapiens GN=ACADM PE=1 SV=1;>sp|P	ENSG00000117054	ENSP00000359871;ENSP00000359878;ENSP00000409612;ENSP00000442324	ACADM_HUMAN;B7Z9I1_HUMAN;Q5T4U5_HUMAN	Not Sig	logFC < 2.0	UNCERTAIN
437	21.4958	21.4598	21.4551	21.8741	21.7117	21.2079	21.4808	21.5719	NA	NA	NA	NA	NA	543	0.21186	0.825808	-0.0781069	-0.0363818	B7ZC39;B7ZC38;Q9NR46;F8WFB9	B7ZC39;B7ZC38;Q9NR46;F8WFB9	Endophilin-B2	SH3GLB2	>tr|B7ZC39|B7ZC39_HUMAN Endophilin-B2 OS=Homo sapiens GN=SH3GLB2 PE=1 SV=1;>tr|B7ZC38|B7ZC38_HUMAN Endophilin-B2 OS=Homo sapiens GN=SH3GLB2 PE=1 SV=1;>sp|Q9NR46|SHLB2_HUMAN Endophilin-B2 OS=Homo sapiens GN=SH3GLB2 PE=1 SV=1;>tr|F8WFB9|F8WFB9_HUMAN Endophil	ENSG00000148341	ENSP00000361634;ENSP00000361640;ENSP00000361645;ENSP00000388282;ENSP00000400951;ENSP00000402566	B7ZC38_HUMAN;B7ZC39_HUMAN;F8WFB9_HUMAN;SHLB2_HUMAN	Not Sig	logFC < 2.0	UNCERTAIN
438	20.3319	21.8743	22.1722	22.4047	22.1395	22.2711	20.4986	22.3695	NA	NA	NA	NA	NA	544	0.0686721	0.77715	0.123913	0.0468675	B7ZL14;Q96RU3;H0Y7W6	B7ZL14;Q96RU3;H0Y7W6	Formin-binding protein 1	FNBP1	>tr|B7ZL14|B7ZL14_HUMAN FNBP1 protein OS=Homo sapiens GN=FNBP1 PE=1 SV=1;>sp|Q96RU3|FNBP1_HUMAN Formin-binding protein 1 OS=Homo sapiens GN=FNBP1 PE=1 SV=2;>tr|H0Y7W6|H0Y7W6_HUMAN Formin-binding protein 1 (Fragment) OS=Homo sapiens GN=FNBP1 PE=1 SV=2	ENSG00000187239	ENSP00000347907;ENSP00000361493;ENSP00000413625;ENSP00000415602	B7ZL14_HUMAN;FNBP1_HUMAN;H0Y7W6_HUMAN	Not Sig	logFC < 2.0	UNCERTAIN
439	21.2145	21.286	20.9027	21.3257	21.3837	21.1178	21.2236	21.5383	NA	NA	NA	NA	NA	546	0.451085	0.704274	0.133627	0.0626467	H7C173;H7C202;B8ZZ87;Q6P582;Q6NZ67;H7BZ50	H7C173;H7C202;B8ZZ87;Q6P582;Q6NZ67;H7BZ50	Mitotic-spindle organizing protein 2A;Mitotic-spindle organizing protein 2B	MZT2B;MZT2A	>tr|H7C173|H7C173_HUMAN Mitotic-spindle organizing protein 2B (Fragment) OS=Homo sapiens GN=MZT2B PE=1 SV=1;>tr|H7C202|H7C202_HUMAN Mitotic-spindle organizing protein 2A (Fragment) OS=Homo sapiens GN=MZT2A PE=4 SV=1;>tr|B8ZZ87|B8ZZ87_HUMAN Mitotic-spindle	ENSG00000152082;ENSG00000173272	ENSP00000281871;ENSP00000311500;ENSP00000386419;ENSP00000387805;ENSP00000398749;ENSP00000403353	B8ZZ87_HUMAN;H7BZ50_HUMAN;H7C173_HUMAN;H7C202_HUMAN;MZT2A_HUMAN;MZT2B_HUMAN	Not Sig	logFC < 2.0	UNCERTAIN
440	23.5544	23.69	24.297	23.4986	24.6473	23.6899	23.8072	23.628	NA	NA	NA	NA	NA	548	0.248481	0.636803	0.183111	0.0796051	B8ZZA8;B8ZZC5	B8ZZA8;B8ZZC5	NA	GLS	>tr|B8ZZA8|B8ZZA8_HUMAN Glutaminase kidney isoform, mitochondrial OS=Homo sapiens GN=GLS PE=1 SV=1;>tr|B8ZZC5|B8ZZC5_HUMAN Glutaminase kidney isoform, mitochondrial OS=Homo sapiens GN=GLS PE=1 SV=1	ENSG00000115419	ENSP00000386417;ENSP00000387135	B8ZZA8_HUMAN;B8ZZC5_HUMAN	Not Sig	logFC < 2.0	UNCERTAIN
441	23.3306	23.5298	23.5235	23.5879	22.8801	23.0801	23.2048	23.4842	NA	NA	NA	NA	NA	549	1.26803	0.405035	-0.330672	-0.154643	B8ZZF0;C9JIR6;O75688	B8ZZF0;C9JIR6;O75688	Protein phosphatase 1B	PPM1B	>tr|B8ZZF0|B8ZZF0_HUMAN Protein phosphatase 1B (Fragment) OS=Homo sapiens GN=PPM1B PE=1 SV=2;>tr|C9JIR6|C9JIR6_HUMAN Protein phosphatase 1B (Fragment) OS=Homo sapiens GN=PPM1B PE=1 SV=1;>sp|O75688|PPM1B_HUMAN Protein phosphatase 1B OS=Homo sapiens GN=PPM1B	ENSG00000138032	ENSP00000282412;ENSP00000326089;ENSP00000367813;ENSP00000386982;ENSP00000387287;ENSP00000387341;ENSP00000390087	B8ZZF0_HUMAN;C9JIR6_HUMAN;PPM1B_HUMAN	Not Sig	logFC < 2.0	UNCERTAIN
442	24.4774	24.375	24.6925	24.6439	23.7031	24.561	24.7327	24.9287	NA	NA	NA	NA	NA	551	0.0851547	0.860001	-0.0658102	-0.0288651	B8ZZN6;P63165;B8ZZJ0;B9A032;B8ZZ67	B8ZZN6;P63165;B8ZZJ0;B9A032	Small ubiquitin-related modifier 1	SUMO1	>tr|B8ZZN6|B8ZZN6_HUMAN Small ubiquitin-related modifier 1 OS=Homo sapiens GN=SUMO1 PE=1 SV=1;>sp|P63165|SUMO1_HUMAN Small ubiquitin-related modifier 1 OS=Homo sapiens GN=SUMO1 PE=1 SV=1;>tr|B8ZZJ0|B8ZZJ0_HUMAN Small ubiquitin-related modifier 1 OS=Homo sa	ENSG00000116030	ENSP00000376076;ENSP00000376077;ENSP00000386296;ENSP00000386753;ENSP00000387204	B8ZZJ0_HUMAN;B8ZZN6_HUMAN;B9A032_HUMAN;SUMO1_HUMAN	Not Sig	logFC < 2.0	UNCERTAIN
443	29.3811	29.4947	28.9916	29.8129	27.0474	29.664	29.2917	29.8057	NA	NA	NA	NA	NA	552	0.29352	0.364985	-0.467872	-0.175492	B8ZZQ6;P06454;B8ZZA1;B8ZZW7;H7C2N1;A0A087WUT1	B8ZZQ6;P06454;B8ZZA1;B8ZZW7;H7C2N1;A0A087WUT1	Prothymosin alpha;Prothymosin alpha, N-terminally processed;Thymosin alpha-1	PTMA	>tr|B8ZZQ6|B8ZZQ6_HUMAN Prothymosin alpha OS=Homo sapiens GN=PTMA PE=1 SV=1;>sp|P06454|PTMA_HUMAN Prothymosin alpha OS=Homo sapiens GN=PTMA PE=1 SV=2;>tr|B8ZZA1|B8ZZA1_HUMAN Prothymosin alpha OS=Homo sapiens GN=PTMA PE=1 SV=1;>tr|B8ZZW7|B8ZZW7_HUMAN Prothy	ENSG00000187514	ENSP00000344547;ENSP00000386519;ENSP00000386645;ENSP00000386819;ENSP00000387102;ENSP00000406903	B8ZZA1_HUMAN;B8ZZQ6_HUMAN;B8ZZW7_HUMAN;H7C2N1_HUMAN;PTMA_HUMAN	Not Sig	logFC < 2.0	UNCERTAIN
444	22.2477	22.2435	22.7022	20.5669	21.9132	22.1884	22.6633	22.6257	NA	NA	NA	NA	NA	557	0.347513	0.388285	0.407595	0.1628	F8WCJ3;B8ZZX4;O14530;F8WBV5;G3XAJ4	F8WCJ3;B8ZZX4;O14530;F8WBV5;G3XAJ4	Thioredoxin domain-containing protein 9	TXNDC9	>tr|F8WCJ3|F8WCJ3_HUMAN Thioredoxin domain-containing protein 9 OS=Homo sapiens GN=TXNDC9 PE=1 SV=1;>tr|B8ZZX4|B8ZZX4_HUMAN Thioredoxin domain-containing protein 9 (Fragment) OS=Homo sapiens GN=TXNDC9 PE=1 SV=1;>sp|O14530|TXND9_HUMAN Thioredoxin domain-con	ENSG00000115514	ENSP00000264255;ENSP00000386889;ENSP00000391046;ENSP00000402827;ENSP00000406388	B8ZZX4_HUMAN;F8WBV5_HUMAN;F8WCJ3_HUMAN;G3XAJ4_HUMAN;TXND9_HUMAN	Not Sig	logFC < 2.0	UNCERTAIN
445	26.5518	26.6264	26.4917	26.7408	26.5372	26.4762	26.5875	26.7518	NA	NA	NA	NA	NA	558	0.0647299	0.979737	-0.0145307	-0.00698653	B9A018;Q53GS9;A0A087X1B2;F8WC91;C9JIU2;A0A087WW31;C9J0X5	B9A018;Q53GS9;A0A087X1B2	U4/U6.U5 tri-snRNP-associated protein 2	USP39	>tr|B9A018|B9A018_HUMAN U4/U6.U5 tri-snRNP-associated protein 2 OS=Homo sapiens GN=USP39 PE=1 SV=1;>sp|Q53GS9|SNUT2_HUMAN U4/U6.U5 tri-snRNP-associated protein 2 OS=Homo sapiens GN=USP39 PE=1 SV=2;>tr|A0A087X1B2|A0A087X1B2_HUMAN U4/U6.U5 tri-snRNP-associat	ENSG00000168883	ENSP00000312981;ENSP00000386572;ENSP00000386864;ENSP00000396133	B9A018_HUMAN;SNUT2_HUMAN	Not Sig	logFC < 2.0	UNCERTAIN
446	24.3636	24.1393	24.0997	24.0556	24.052	24.0194	24.2998	24.3541	NA	NA	NA	NA	NA	561	0.0541797	0.974301	0.0168133	0.00797129	B9EGQ5;M0QXA7;O95785	B9EGQ5;M0QXA7;O95785	Protein Wiz	WIZ	>tr|B9EGQ5|B9EGQ5_HUMAN Protein Wiz OS=Homo sapiens GN=WIZ PE=1 SV=1;>tr|M0QXA7|M0QXA7_HUMAN Protein Wiz OS=Homo sapiens GN=WIZ PE=1 SV=1;>sp|O95785|WIZ_HUMAN Protein Wiz OS=Homo sapiens GN=WIZ PE=1 SV=2	ENSG00000011451	ENSP00000263381;ENSP00000373933;ENSP00000469022	B9EGQ5_HUMAN;M0QXA7_HUMAN;WIZ_HUMAN	Not Sig	logFC < 2.0	UNCERTAIN
447	23.4297	23.5961	24.1305	23.3512	23.7397	23.1334	23.1613	23.056	NA	NA	NA	NA	NA	563	0.736637	0.398862	-0.354293	-0.158476	B9ZVN9;O95602	B9ZVN9;O95602	DNA-directed RNA polymerase;DNA-directed RNA polymerase I subunit RPA1	POLR1A	>tr|B9ZVN9|B9ZVN9_HUMAN DNA-directed RNA polymerase OS=Homo sapiens GN=POLR1A PE=1 SV=1;>sp|O95602|RPA1_HUMAN DNA-directed RNA polymerase I subunit RPA1 OS=Homo sapiens GN=POLR1A PE=1 SV=2	ENSG00000068654	ENSP00000263857;ENSP00000386300	B9ZVN9_HUMAN;RPA1_HUMAN	Not Sig	logFC < 2.0	UNCERTAIN
448	24.2226	23.9057	24.479	23.9696	24.4512	24.1335	23.7497	23.7913	NA	NA	NA	NA	NA	564	0.214268	0.753196	-0.112776	-0.0510298	B9ZVT1;Q8IXT5;E5RHG1;E5RJ83;E5RJV8	B9ZVT1;Q8IXT5	RNA-binding protein 12B	RBM12B	>tr|B9ZVT1|B9ZVT1_HUMAN RNA-binding protein 12B OS=Homo sapiens GN=RBM12B PE=1 SV=2;>sp|Q8IXT5|RB12B_HUMAN RNA-binding protein 12B OS=Homo sapiens GN=RBM12B PE=1 SV=2	ENSG00000183808	ENSP00000382239;ENSP00000427729	B9ZVT1_HUMAN;RB12B_HUMAN	Not Sig	logFC < 2.0	UNCERTAIN
449	26.0408	25.9721	25.9646	26.1761	26.0286	26.1283	26.1737	25.9057	NA	NA	NA	NA	NA	568	0.0982428	0.96399	0.0206604	0.00994703	C9IYN3;D6W592;Q8WVV9;B7WPG3;H7C464;H7BXH8;C9JJZ7	C9IYN3;D6W592;Q8WVV9;B7WPG3	Heterogeneous nuclear ribonucleoprotein L-like	HNRNPLL;HNRPLL	>tr|C9IYN3|C9IYN3_HUMAN Heterogeneous nuclear ribonucleoprotein L-like OS=Homo sapiens GN=HNRNPLL PE=1 SV=2;>tr|D6W592|D6W592_HUMAN Heterogeneous nuclear ribonucleoprotein L-like OS=Homo sapiens GN=HNRPLL PE=1 SV=1;>sp|Q8WVV9|HNRLL_HUMAN Heterogeneous nucl	ENSG00000143889	ENSP00000351136;ENSP00000368195;ENSP00000386695;ENSP00000387088;ENSP00000390625	B7WPG3_HUMAN;C9IYN3_HUMAN;D6W592_HUMAN;HNRLL_HUMAN	Not Sig	logFC < 2.0	UNCERTAIN
450	24.7147	24.6499	24.3036	24.6606	24.4858	24.5341	24.6823	24.5959	NA	NA	NA	NA	NA	569	0.025489	0.988849	-0.00768328	-0.00365337	C9J3L8;C9J5W0;E9PAL7;C9IZQ1;P43307	C9J3L8;C9J5W0;E9PAL7;C9IZQ1;P43307	Translocon-associated protein subunit alpha	SSR1	>tr|C9J3L8|C9J3L8_HUMAN Translocon-associated protein subunit alpha OS=Homo sapiens GN=SSR1 PE=1 SV=1;>tr|C9J5W0|C9J5W0_HUMAN Translocon-associated protein subunit alpha OS=Homo sapiens GN=SSR1 PE=1 SV=1;>tr|E9PAL7|E9PAL7_HUMAN Translocon-associated protei	ENSG00000124783	ENSP00000244763;ENSP00000380647;ENSP00000417290;ENSP00000417911;ENSP00000418617	C9IZQ1_HUMAN;C9J3L8_HUMAN;C9J5W0_HUMAN;E9PAL7_HUMAN;SSRA_HUMAN	Not Sig	logFC < 2.0	UNCERTAIN
451	24.0211	23.7707	23.4749	23.5557	25.0353	24.2835	24.2219	24.5991	NA	NA	NA	NA	NA	570	2.00858	0.116333	0.829335	0.373122	C9J9T0;C9IZU8;Q96AT9;F8WBT4;C9IYE8;E7ESZ6;C9J8S0;C9J6A7	C9J9T0;C9IZU8;Q96AT9	Ribulose-phosphate 3-epimerase	RPE	>tr|C9J9T0|C9J9T0_HUMAN Ribulose-5-phosphate-3-epimerase, isoform CRA_a OS=Homo sapiens GN=RPE PE=1 SV=1;>tr|C9IZU8|C9IZU8_HUMAN Ribulose-phosphate 3-epimerase OS=Homo sapiens GN=RPE PE=1 SV=1;>sp|Q96AT9|RPE_HUMAN Ribulose-phosphate 3-epimerase OS=Homo sap	ENSG00000197713	ENSP00000352401;ENSP00000400449;ENSP00000411186	C9IZU8_HUMAN;C9J9T0_HUMAN;RPE_HUMAN	Not Sig	logFC < 2.0	UNCERTAIN
452	23.3661	23.2458	23.6429	23.2408	23.7811	23.5188	23.4716	23.3365	NA	NA	NA	NA	NA	572	0.534849	0.665071	0.153047	0.07177	C9J0I9;Q86WB0;F8WAU5;F8WBD7;F8WDK5;F8WF13	C9J0I9;Q86WB0	Nuclear-interacting partner of ALK	ZC3HC1	>tr|C9J0I9|C9J0I9_HUMAN Nuclear-interacting partner of ALK OS=Homo sapiens GN=ZC3HC1 PE=1 SV=1;>sp|Q86WB0|NIPA_HUMAN Nuclear-interacting partner of ALK OS=Homo sapiens GN=ZC3HC1 PE=1 SV=1	ENSG00000091732	ENSP00000309301;ENSP00000351052;ENSP00000353933;ENSP00000418533	C9J0I9_HUMAN;NIPA_HUMAN	Not Sig	logFC < 2.0	UNCERTAIN
453	26.4212	26.2306	26.14	26.2731	26.3849	26.5783	26.5497	26.7995	NA	NA	NA	NA	NA	573	1.62813	0.418049	0.311881	0.148272	C9J0K6;P30626;B4DHQ6;E9PG82	C9J0K6;P30626;B4DHQ6	Sorcin	SRI	>tr|C9J0K6|C9J0K6_HUMAN Sorcin OS=Homo sapiens GN=SRI PE=1 SV=1;>sp|P30626|SORCN_HUMAN Sorcin OS=Homo sapiens GN=SRI PE=1 SV=1;>tr|B4DHQ6|B4DHQ6_HUMAN Sorcin OS=Homo sapiens GN=SRI PE=1 SV=1	ENSG00000075142	ENSP00000265729;ENSP00000378137;ENSP00000397609;ENSP00000418512	B4DHQ6_HUMAN;C9J0K6_HUMAN;SORCN_HUMAN	Not Sig	logFC < 2.0	UNCERTAIN
454	25.7772	25.4184	25.3748	25.6775	25.4397	25.7225	25.6585	25.967	NA	NA	NA	NA	NA	575	0.407131	0.704112	0.134971	0.0628874	D6RBD7;C9J1V9;O43324;H0YAL7;D6RCQ0;H0YAH9	D6RBD7;C9J1V9;O43324;H0YAL7	Eukaryotic translation elongation factor 1 epsilon-1	EEF1E1;EEF1E1-BLOC1S5	>tr|D6RBD7|D6RBD7_HUMAN Eukaryotic translation elongation factor 1 epsilon-1 OS=Homo sapiens GN=EEF1E1 PE=4 SV=1;>tr|C9J1V9|C9J1V9_HUMAN HCG2043275 OS=Homo sapiens GN=EEF1E1-BLOC1S5 PE=4 SV=2;>sp|O43324|MCA3_HUMAN Eukaryotic translation elongation factor 1	ENSG00000124802;ENSG00000265818	ENSP00000369038;ENSP00000380597;ENSP00000414363;ENSP00000424222;ENSP00000427572	C9J1V9_HUMAN;D6RBD7_HUMAN;H0YAL7_HUMAN;MCA3_HUMAN	Not Sig	logFC < 2.0	UNCERTAIN
455	25.3741	25.4317	25.8871	25.4709	25.4371	25.1845	25.2816	25.0914	NA	NA	NA	NA	NA	577	1.10133	0.449354	-0.292284	-0.136682	C9J2Y9;P30876;C9J4M6	C9J2Y9;P30876;C9J4M6	DNA-directed RNA polymerase;DNA-directed RNA polymerase II subunit RPB2	POLR2B	>tr|C9J2Y9|C9J2Y9_HUMAN DNA-directed RNA polymerase OS=Homo sapiens GN=POLR2B PE=1 SV=2;>sp|P30876|RPB2_HUMAN DNA-directed RNA polymerase II subunit RPB2 OS=Homo sapiens GN=POLR2B PE=1 SV=1;>tr|C9J4M6|C9J4M6_HUMAN DNA-directed RNA polymerase OS=Homo sapien	ENSG00000047315	ENSP00000312735;ENSP00000370625;ENSP00000391096;ENSP00000391452	C9J2Y9_HUMAN;C9J4M6_HUMAN;RPB2_HUMAN	Not Sig	logFC < 2.0	UNCERTAIN
456	21.7322	21.9725	22.131	21.5558	22.965	21.7203	22.1156	21.7588	NA	NA	NA	NA	NA	578	0.408032	0.478613	0.292041	0.126106	C9J384;Q9BQ75;H7C515	C9J384;Q9BQ75;H7C515	Protein CMSS1	CMSS1	>tr|C9J384|C9J384_HUMAN Protein CMSS1 (Fragment) OS=Homo sapiens GN=CMSS1 PE=1 SV=1;>sp|Q9BQ75|CMS1_HUMAN Protein CMSS1 OS=Homo sapiens GN=CMSS1 PE=1 SV=2;>tr|H7C515|H7C515_HUMAN Protein CMSS1 (Fragment) OS=Homo sapiens GN=CMSS1 PE=1 SV=1	ENSG00000184220	ENSP00000410396;ENSP00000417293;ENSP00000418762	C9J384_HUMAN;CMS1_HUMAN;H7C515_HUMAN	Not Sig	logFC < 2.0	UNCERTAIN
457	27.6592	27.7028	27.8633	27.8322	27.6409	27.5205	27.6986	27.6762	NA	NA	NA	NA	NA	579	1.06895	0.703226	-0.130297	-0.0631493	C9J406;H7C463	C9J406;H7C463	NA	IMMT	>tr|C9J406|C9J406_HUMAN MICOS complex subunit MIC60 OS=Homo sapiens GN=IMMT PE=1 SV=1;>tr|H7C463|H7C463_HUMAN MICOS complex subunit MIC60 (Fragment) OS=Homo sapiens GN=IMMT PE=1 SV=1	ENSG00000132305	ENSP00000254636;ENSP00000415762	C9J406_HUMAN;H7C463_HUMAN	Not Sig	logFC < 2.0	UNCERTAIN
458	21.848	21.7937	21.8952	21.842	22.5883	21.7128	22.2288	21.8683	NA	NA	NA	NA	NA	580	0.615185	0.508288	0.254806	0.116001	C9J494;Q9H000	C9J494;Q9H000	Probable E3 ubiquitin-protein ligase makorin-2	MKRN2	>tr|C9J494|C9J494_HUMAN Probable E3 ubiquitin-protein ligase makorin-2 OS=Homo sapiens GN=MKRN2 PE=1 SV=1;>sp|Q9H000|MKRN2_HUMAN Probable E3 ubiquitin-protein ligase makorin-2 OS=Homo sapiens GN=MKRN2 PE=1 SV=2	ENSG00000075975	ENSP00000170447;ENSP00000397983	C9J494_HUMAN;MKRN2_HUMAN	Not Sig	logFC < 2.0	UNCERTAIN
459	25.8093	25.7892	25.5937	26.2593	25.0666	25.6035	25.7754	26.0913	NA	NA	NA	NA	NA	582	0.390339	0.555737	-0.228679	-0.10134	C9J4Z3;P61513;M0R0A1;Q6P4E4;E9PEL3;M0R2L6;G5E9R3;A6NKH3	C9J4Z3;P61513;M0R0A1;Q6P4E4;E9PEL3;M0R2L6;G5E9R3	60S ribosomal protein L37a	RPL37A	>tr|C9J4Z3|C9J4Z3_HUMAN 60S ribosomal protein L37a OS=Homo sapiens GN=RPL37A PE=1 SV=1;>sp|P61513|RL37A_HUMAN 60S ribosomal protein L37a OS=Homo sapiens GN=RPL37A PE=1 SV=2;>tr|M0R0A1|M0R0A1_HUMAN 60S ribosomal protein L37a OS=Homo sapiens GN=RPL37A PE=1 S	ENSG00000197756	ENSP00000388690;ENSP00000410080;ENSP00000410240;ENSP00000418082;ENSP00000469607;ENSP00000470348;ENSP00000471102;ENSP00000472653	C9J4Z3_HUMAN;E9PEL3_HUMAN;G5E9R3_HUMAN;M0R0A1_HUMAN;M0R2L6_HUMAN;Q6P4E4_HUMAN;RL37A_HUMAN	Not Sig	logFC < 2.0	UNCERTAIN
460	24.4847	24.3047	24.2391	24.0103	24.4007	24.9457	24.8083	24.9105	NA	NA	NA	NA	NA	583	1.72205	0.259995	0.506568	0.234624	C9J5N1;Q9BTE6;L7N2F4;K7N799;K7EQ85	C9J5N1;Q9BTE6;L7N2F4	Alanyl-tRNA editing protein Aarsd1	PTGES3L-AARSD1;AARSD1	>tr|C9J5N1|C9J5N1_HUMAN Protein PTGES3L-AARSD1 OS=Homo sapiens GN=PTGES3L-AARSD1 PE=1 SV=1;>sp|Q9BTE6|AASD1_HUMAN Alanyl-tRNA editing protein Aarsd1 OS=Homo sapiens GN=AARSD1 PE=1 SV=2;>tr|L7N2F4|L7N2F4_HUMAN Alanyl-tRNA-editing protein Aarsd1 (Fragment) O	ENSG00000108825;ENSG00000266967	ENSP00000353355;ENSP00000386254;ENSP00000386621;ENSP00000400735;ENSP00000400870;ENSP00000409924	AASD1_HUMAN;C9J5N1_HUMAN;L7N2F4_HUMAN	Not Sig	logFC < 2.0	UNCERTAIN
461	21.2657	20.7839	20.9814	20.9684	21.445	21.5277	21.4648	21.4188	NA	NA	NA	NA	NA	585	2.40815	0.283047	0.46423	0.22084	C9J6G3;C9J7M1;O95749	C9J6G3;C9J7M1;O95749	Geranylgeranyl pyrophosphate synthase	GGPS1	>tr|C9J6G3|C9J6G3_HUMAN Geranylgeranyl pyrophosphate synthase (Fragment) OS=Homo sapiens GN=GGPS1 PE=1 SV=1;>tr|C9J7M1|C9J7M1_HUMAN Geranylgeranyl pyrophosphate synthase (Fragment) OS=Homo sapiens GN=GGPS1 PE=1 SV=1;>sp|O95749|GGPPS_HUMAN Geranylgeranyl py	ENSG00000152904	ENSP00000282841;ENSP00000351852;ENSP00000417772;ENSP00000417865;ENSP00000418690;ENSP00000420183	C9J6G3_HUMAN;C9J7M1_HUMAN;GGPPS_HUMAN	Not Sig	logFC < 2.0	UNCERTAIN
462	22.6049	22.0027	22.1023	22.9399	22.134	23.1221	22.9413	23.8352	NA	NA	NA	NA	NA	588	0.7009	0.239477	0.595673	0.246881	C9J6N5;C9JQ40;C9JW51;Q9H098;C9JYP1;C9J6Y8;X6RET8;C9JP05;C9J3Q3;F8WCJ2	C9J6N5;C9JQ40;C9JW51;Q9H098;C9JYP1;C9J6Y8;X6RET8;C9JP05;C9J3Q3	Protein FAM107B	FAM107B	>tr|C9J6N5|C9J6N5_HUMAN Protein FAM107B (Fragment) OS=Homo sapiens GN=FAM107B PE=1 SV=7;>tr|C9JQ40|C9JQ40_HUMAN Protein FAM107B (Fragment) OS=Homo sapiens GN=FAM107B PE=1 SV=1;>tr|C9JW51|C9JW51_HUMAN Protein FAM107B (Fragment) OS=Homo sapiens GN=FAM107B PE	ENSG00000065809	ENSP00000181796;ENSP00000367719;ENSP00000367722;ENSP00000367723;ENSP00000367726;ENSP00000367728;ENSP00000367731;ENSP00000397949;ENSP00000413676;ENSP00000417242;ENSP00000417782;ENSP00000417845;ENSP00000418120;ENSP00000418330;ENSP00000418395;ENSP00000419064;ENSP00000419603;ENSP00000420249;ENSP00000420314;ENSP00000420444	C9J3Q3_HUMAN;C9J6N5_HUMAN;C9J6Y8_HUMAN;C9JP05_HUMAN;C9JQ40_HUMAN;C9JW51_HUMAN;C9JYP1_HUMAN;F107B_HUMAN	Not Sig	logFC < 2.0	UNCERTAIN
463	25.1288	25.3566	25.4448	24.8403	25.8292	25.2524	25.174	24.8245	NA	NA	NA	NA	NA	589	0.115945	0.834729	0.0774121	0.0344326	C9J7E5;Q9Y5L0;E9PFH4	C9J7E5;Q9Y5L0;E9PFH4	Transportin-3	TNPO3	>tr|C9J7E5|C9J7E5_HUMAN Transportin-3 OS=Homo sapiens GN=TNPO3 PE=1 SV=1;>sp|Q9Y5L0|TNPO3_HUMAN Transportin-3 OS=Homo sapiens GN=TNPO3 PE=1 SV=3;>tr|E9PFH4|E9PFH4_HUMAN Transportin-3 OS=Homo sapiens GN=TNPO3 PE=1 SV=1	ENSG00000064419	ENSP00000265388;ENSP00000376936;ENSP00000418267;ENSP00000418646;ENSP00000420089	C9J7E5_HUMAN;E9PFH4_HUMAN;TNPO3_HUMAN	Not Sig	logFC < 2.0	UNCERTAIN
464	21.4494	22.1948	21.8734	22.1689	21.4808	21.9238	21.6315	21.9986	NA	NA	NA	NA	NA	592	0.326772	0.657602	-0.162951	-0.0736678	C9J8Q5;P51649	C9J8Q5;P51649	Succinate-semialdehyde dehydrogenase, mitochondrial	ALDH5A1	>tr|C9J8Q5|C9J8Q5_HUMAN Succinate-semialdehyde dehydrogenase, mitochondrial OS=Homo sapiens GN=ALDH5A1 PE=1 SV=1;>sp|P51649|SSDH_HUMAN Succinate-semialdehyde dehydrogenase, mitochondrial OS=Homo sapiens GN=ALDH5A1 PE=1 SV=2	ENSG00000112294	ENSP00000314649;ENSP00000350191;ENSP00000417687	C9J8Q5_HUMAN;SSDH_HUMAN	Not Sig	logFC < 2.0	UNCERTAIN
465	22.8532	22.7609	23.3856	22.6723	22.9594	22.9353	23.3362	22.9113	NA	NA	NA	NA	NA	594	0.253901	0.74272	0.117539	0.0536903	C9J8U1;F8WAN1;Q69YQ0	C9J8U1;F8WAN1;Q69YQ0	Cytospin-A	SPECC1L;SPECC1L-ADORA2A	>tr|C9J8U1|C9J8U1_HUMAN Cytospin-A (Fragment) OS=Homo sapiens GN=SPECC1L PE=4 SV=7;>tr|F8WAN1|F8WAN1_HUMAN Protein SPECC1L-ADORA2A OS=Homo sapiens GN=SPECC1L-ADORA2A PE=4 SV=2;>sp|Q69YQ0|CYTSA_HUMAN Cytospin-A OS=Homo sapiens GN=SPECC1L PE=1 SV=2	ENSG00000100014;ENSG00000258555	ENSP00000325785;ENSP00000351480;ENSP00000393363;ENSP00000405671	C9J8U1_HUMAN;CYTSA_HUMAN;F8WAN1_HUMAN	Not Sig	logFC < 2.0	UNCERTAIN
466	22.0689	22.2169	23.418	21.9433	22.4838	20.069	22.1406	20.8438	NA	NA	NA	NA	NA	595	0.771451	0.105397	-1.02748	-0.386606	C9J931;Q15382;C9J469	C9J931;Q15382;C9J469	GTP-binding protein Rheb	RHEB	>tr|C9J931|C9J931_HUMAN GTP-binding protein Rheb OS=Homo sapiens GN=RHEB PE=1 SV=1;>sp|Q15382|RHEB_HUMAN GTP-binding protein Rheb OS=Homo sapiens GN=RHEB PE=1 SV=1;>tr|C9J469|C9J469_HUMAN GTP-binding protein Rheb (Fragment) OS=Homo sapiens GN=RHEB PE=1 SV=	ENSG00000106615	ENSP00000262187;ENSP00000417212;ENSP00000418161;ENSP00000420726	C9J469_HUMAN;C9J931_HUMAN;RHEB_HUMAN	Not Sig	logFC < 2.0	UNCERTAIN
467	29.9675	29.7688	29.6746	29.9577	29.6813	30.0466	29.9134	30.1105	NA	NA	NA	NA	NA	596	0.344698	0.785595	0.0958142	0.0452124	C9J9K3;P08865;A0A0C4DG17;F8WD59	C9J9K3;P08865;A0A0C4DG17;F8WD59	40S ribosomal protein SA	RPSA	>tr|C9J9K3|C9J9K3_HUMAN 40S ribosomal protein SA (Fragment) OS=Homo sapiens GN=RPSA PE=1 SV=7;>sp|P08865|RSSA_HUMAN 40S ribosomal protein SA OS=Homo sapiens GN=RPSA PE=1 SV=4;>tr|A0A0C4DG17|A0A0C4DG17_HUMAN 40S ribosomal protein SA OS=Homo sapiens GN=RPSA	ENSG00000168028	ENSP00000346067;ENSP00000389351;ENSP00000396716;ENSP00000410848	C9J9K3_HUMAN;F8WD59_HUMAN;RSSA_HUMAN	Not Sig	logFC < 2.0	UNCERTAIN
468	23.0995	23.1405	23.6196	23.1454	22.9895	22.9062	23.2807	22.9455	NA	NA	NA	NA	NA	598	0.719325	0.551307	-0.220788	-0.102704	C9JA08;Q96D46;C9IZW9;C9K0C2;C9J0B9;C9IY70	C9JA08;Q96D46	60S ribosomal export protein NMD3	NMD3	>tr|C9JA08|C9JA08_HUMAN 60S ribosomal export protein NMD3 OS=Homo sapiens GN=NMD3 PE=1 SV=1;>sp|Q96D46|NMD3_HUMAN 60S ribosomal export protein NMD3 OS=Homo sapiens GN=NMD3 PE=1 SV=1	ENSG00000169251	ENSP00000307525;ENSP00000417559;ENSP00000419004	C9JA08_HUMAN;NMD3_HUMAN	Not Sig	logFC < 2.0	UNCERTAIN
469	22.1311	21.8551	22.0809	21.591	22.8932	22.718	20.7471	21.9322	NA	NA	NA	NA	NA	600	0.116639	0.702966	0.158063	0.0631218	C9JA93	C9JA93	NA	TBC1D15	>tr|C9JA93|C9JA93_HUMAN TBC1 domain family member 15 (Fragment) OS=Homo sapiens GN=TBC1D15 PE=1 SV=1	ENSG00000121749	ENSP00000418091	C9JA93_HUMAN	Not Sig	logFC < 2.0	UNCERTAIN
470	21.2461	22.6641	21.3698	22.5736	22.2516	20.4923	22.5609	22.81	NA	NA	NA	NA	NA	601	0.0348191	0.883578	0.0653181	0.0246699	C9JAF7;O95721	C9JAF7;O95721	Synaptosomal-associated protein;Synaptosomal-associated protein 29	SNAP29	>tr|C9JAF7|C9JAF7_HUMAN Synaptosomal-associated protein 29 (Fragment) OS=Homo sapiens GN=SNAP29 PE=1 SV=1;>sp|O95721|SNP29_HUMAN Synaptosomal-associated protein 29 OS=Homo sapiens GN=SNAP29 PE=1 SV=1	ENSG00000099940	ENSP00000215730;ENSP00000411095	C9JAF7_HUMAN;SNP29_HUMAN	Not Sig	logFC < 2.0	UNCERTAIN
471	23.0396	22.8987	20.9523	20.6998	21.9662	22.897	22.7839	22.9549	NA	NA	NA	NA	NA	602	0.52373	0.201595	0.752912	0.282734	C9JAW5;C9JNU6;Q9Y241	C9JAW5;C9JNU6;Q9Y241	HIG1 domain family member 1A, mitochondrial	HIGD1A	>tr|C9JAW5|C9JAW5_HUMAN Uncharacterized protein OS=Homo sapiens PE=4 SV=1;>tr|C9JNU6|C9JNU6_HUMAN HIG1 domain family member 1A, mitochondrial OS=Homo sapiens GN=HIGD1A PE=4 SV=1;>sp|Q9Y241|HIG1A_HUMAN HIG1 domain family member 1A, mitochondrial OS=Homo sap	ENSG00000181061	ENSP00000319393;ENSP00000398064;ENSP00000402160;ENSP00000406044;ENSP00000408289	C9JAW5_HUMAN;C9JNU6_HUMAN;HIG1A_HUMAN	Not Sig	logFC < 2.0	UNCERTAIN
472	20.9406	20.7625	20.6179	21.476	21.2459	21.9575	22.0455	19.7734	NA	NA	NA	NA	NA	603	0.219821	0.496935	0.306335	0.119757	C9JAX1;Q16595;H7C585	C9JAX1;Q16595;H7C585	Frataxin, mitochondrial;Frataxin intermediate form;Frataxin(56-210);Frataxin(78-210);Frataxin mature form	FXN	>tr|C9JAX1|C9JAX1_HUMAN Frataxin, mitochondrial OS=Homo sapiens GN=FXN PE=1 SV=1;>sp|Q16595|FRDA_HUMAN Frataxin, mitochondrial OS=Homo sapiens GN=FXN PE=1 SV=2;>tr|H7C585|H7C585_HUMAN Frataxin, mitochondrial (Fragment) OS=Homo sapiens GN=FXN PE=1 SV=1	ENSG00000165060	ENSP00000366482;ENSP00000379650;ENSP00000418015;ENSP00000419243	C9JAX1_HUMAN;FRDA_HUMAN;H7C585_HUMAN	Not Sig	logFC < 2.0	UNCERTAIN
473	24.1836	24.2474	24.3271	24.3003	24.4109	24.5831	24.7002	24.7975	NA	NA	NA	NA	NA	605	2.16047	0.37368	0.358304	0.17152	C9JBI3;P78330;C9JEJ7;F8WD74	C9JBI3;P78330	Phosphoserine phosphatase	PSPH	>tr|C9JBI3|C9JBI3_HUMAN Phosphoserine phosphatase (Fragment) OS=Homo sapiens GN=PSPH PE=1 SV=1;>sp|P78330|SERB_HUMAN Phosphoserine phosphatase OS=Homo sapiens GN=PSPH PE=1 SV=2	ENSG00000146733	ENSP00000275605;ENSP00000378854;ENSP00000398653;ENSP00000401639	C9JBI3_HUMAN;SERB_HUMAN	Not Sig	logFC < 2.0	UNCERTAIN
474	24.0634	23.9611	23.532	24.1384	23.6057	23.8382	23.6731	24.0311	NA	NA	NA	NA	NA	606	0.356227	0.703182	-0.136699	-0.063127	C9JCC6;Q14919;E9PNC7;E9PQX9;E9PMW2	C9JCC6;Q14919;E9PNC7;E9PQX9	Dr1-associated corepressor	DRAP1	>tr|C9JCC6|C9JCC6_HUMAN Dr1-associated corepressor OS=Homo sapiens GN=DRAP1 PE=1 SV=1;>sp|Q14919|NC2A_HUMAN Dr1-associated corepressor OS=Homo sapiens GN=DRAP1 PE=1 SV=3;>tr|E9PNC7|E9PNC7_HUMAN Dr1-associated corepressor (Fragment) OS=Homo sapiens GN=DRAP1	ENSG00000175550	ENSP00000307850;ENSP00000366190;ENSP00000432445;ENSP00000437225	C9JCC6_HUMAN;E9PNC7_HUMAN;E9PQX9_HUMAN;NC2A_HUMAN	Not Sig	logFC < 2.0	UNCERTAIN
475	23.9386	23.9925	24.0394	23.7502	23.1445	23.5666	23.3719	23.0581	NA	NA	NA	NA	NA	609	2.5747	0.181224	-0.644916	-0.302616	C9JG97;C9JEH3;Q13685;C9JTS3;H7C0R2	C9JG97;C9JEH3;Q13685;C9JTS3	Angio-associated migratory cell protein	AAMP	>tr|C9JG97|C9JG97_HUMAN Angio-associated migratory cell protein OS=Homo sapiens GN=AAMP PE=1 SV=1;>tr|C9JEH3|C9JEH3_HUMAN Angio-associated migratory cell protein OS=Homo sapiens GN=AAMP PE=1 SV=1;>sp|Q13685|AAMP_HUMAN Angio-associated migratory cell protei	ENSG00000127837	ENSP00000248450;ENSP00000393818;ENSP00000403343;ENSP00000416394	AAMP_HUMAN;C9JEH3_HUMAN;C9JG97_HUMAN;C9JTS3_HUMAN	Not Sig	logFC < 2.0	UNCERTAIN
476	23.3242	23.1853	23.359	23.1801	22.8259	23.5171	23.3707	23.0645	NA	NA	NA	NA	NA	610	0.160923	0.849823	-0.0676222	-0.0312819	C9JEJ2;P49585;C9J050;Q9Y5K3;C9JVS0;C9JPY0;F8WAZ5;H7C1T3;C9J2E1;F8WBU2;H7BZN1;F2Z2B1	C9JEJ2;P49585;C9J050;Q9Y5K3	Choline-phosphate cytidylyltransferase A;Choline-phosphate cytidylyltransferase B	PCYT1A;PCYT1B	>tr|C9JEJ2|C9JEJ2_HUMAN Choline-phosphate cytidylyltransferase A OS=Homo sapiens GN=PCYT1A PE=1 SV=1;>sp|P49585|PCY1A_HUMAN Choline-phosphate cytidylyltransferase A OS=Homo sapiens GN=PCYT1A PE=1 SV=2;>tr|C9J050|C9J050_HUMAN Choline-phosphate cytidylyltran	ENSG00000102230;ENSG00000161217	ENSP00000292823;ENSP00000349211;ENSP00000368439;ENSP00000368440;ENSP00000390968;ENSP00000394617;ENSP00000400430	C9J050_HUMAN;C9JEJ2_HUMAN;PCY1A_HUMAN;PCY1B_HUMAN	Not Sig	logFC < 2.0	UNCERTAIN
477	23.6967	23.5662	23.4721	23.6456	23.7362	23.6145	23.6343	23.7606	NA	NA	NA	NA	NA	611	0.731855	0.787541	0.0912848	0.0442906	C9JEV6;Q9UJ70;H7C286;H7C3G9;E9PPU6;H0YC94;H0YEB7;H0YE82;H7C1L7	C9JEV6;Q9UJ70;H7C286;H7C3G9;E9PPU6	N-acetyl-D-glucosamine kinase	NAGK	>tr|C9JEV6|C9JEV6_HUMAN N-acetyl-D-glucosamine kinase OS=Homo sapiens GN=NAGK PE=1 SV=3;>sp|Q9UJ70|NAGK_HUMAN N-acetyl-D-glucosamine kinase OS=Homo sapiens GN=NAGK PE=1 SV=4;>tr|H7C286|H7C286_HUMAN N-acetyl-D-glucosamine kinase OS=Homo sapiens GN=NAGK PE=1	ENSG00000124357	ENSP00000244204;ENSP00000389087;ENSP00000396070;ENSP00000404531;ENSP00000411846;ENSP00000436326	C9JEV6_HUMAN;E9PPU6_HUMAN;H7C286_HUMAN;H7C3G9_HUMAN;NAGK_HUMAN	Not Sig	logFC < 2.0	UNCERTAIN
478	26.954	26.9719	26.7056	27.2481	26.4529	27.0328	27.0695	27.5893	NA	NA	NA	NA	NA	614	0.0938997	0.857143	0.0662088	0.0293303	C9JFR7;P99999;CON__P62894	C9JFR7;P99999	Cytochrome c	CYCS	>tr|C9JFR7|C9JFR7_HUMAN Cytochrome c (Fragment) OS=Homo sapiens GN=CYCS PE=1 SV=1;>sp|P99999|CYC_HUMAN Cytochrome c OS=Homo sapiens GN=CYCS PE=1 SV=2	ENSG00000172115	ENSP00000307786;ENSP00000386270;ENSP00000387279;ENSP00000416479	C9JFR7_HUMAN;CYC_HUMAN	Not Sig	logFC < 2.0	UNCERTAIN
479	24.1726	24.4583	24.7619	24.1467	25.1272	24.3944	24.1795	23.8598	NA	NA	NA	NA	NA	615	0.00588297	0.992896	0.00536585	0.00232766	C9JFV4;Q8IZL8;E7EV54;I3L445;I3L4P1;I3L1P4;I3L4M7	C9JFV4;Q8IZL8;E7EV54	Proline-, glutamic acid- and leucine-rich protein 1	PELP1	>tr|C9JFV4|C9JFV4_HUMAN Proline-, glutamic acid- and leucine-rich protein 1 OS=Homo sapiens GN=PELP1 PE=1 SV=2;>sp|Q8IZL8|PELP1_HUMAN Proline-, glutamic acid- and leucine-rich protein 1 OS=Homo sapiens GN=PELP1 PE=1 SV=2;>tr|E7EV54|E7EV54_HUMAN Proline-, g	ENSG00000141456	ENSP00000301396;ENSP00000416231;ENSP00000461625	C9JFV4_HUMAN;E7EV54_HUMAN;PELP1_HUMAN	Not Sig	logFC < 2.0	UNCERTAIN
480	22.389	22.3257	22.1584	21.4632	22.3264	22.0409	22.1869	22.4906	NA	NA	NA	NA	NA	616	0.32189	0.637375	0.17712	0.0793074	C9JG87;Q9NYK5	C9JG87;Q9NYK5	39S ribosomal protein L39, mitochondrial	MRPL39	>tr|C9JG87|C9JG87_HUMAN 39S ribosomal protein L39, mitochondrial (Fragment) OS=Homo sapiens GN=MRPL39 PE=1 SV=1;>sp|Q9NYK5|RM39_HUMAN 39S ribosomal protein L39, mitochondrial OS=Homo sapiens GN=MRPL39 PE=1 SV=3	ENSG00000154719	ENSP00000284967;ENSP00000305682;ENSP00000404426	C9JG87_HUMAN;RM39_HUMAN	Not Sig	logFC < 2.0	UNCERTAIN
481	23.7011	23.5873	23.4359	23.7691	24.4844	23.7379	23.642	23.6768	NA	NA	NA	NA	NA	617	0.575281	0.50143	0.261901	0.118319	C9JHF5;Q9GZY8;A0A0A0MS29;C9JU19	C9JHF5;Q9GZY8;A0A0A0MS29	Mitochondrial fission factor	MFF	>tr|C9JHF5|C9JHF5_HUMAN Mitochondrial fission factor (Fragment) OS=Homo sapiens GN=MFF PE=1 SV=1;>sp|Q9GZY8|MFF_HUMAN Mitochondrial fission factor OS=Homo sapiens GN=MFF PE=1 SV=1;>tr|A0A0A0MS29|A0A0A0MS29_HUMAN Mitochondrial fission factor OS=Homo sapiens	ENSG00000168958	ENSP00000302037;ENSP00000304134;ENSP00000304898;ENSP00000338412;ENSP00000346498;ENSP00000375912;ENSP00000386641;ENSP00000386964;ENSP00000415996	C9JHF5_HUMAN;MFF_HUMAN	Not Sig	logFC < 2.0	UNCERTAIN
482	25.286	24.9923	24.9509	24.9337	25.5608	25.4949	25.3977	25.7197	NA	NA	NA	NA	NA	618	2.47979	0.253445	0.502527	0.238523	C9JIF9;P13798;H7C393;H7C1U0;F8WEH5;C9JLK2	C9JIF9;P13798	Acylamino-acid-releasing enzyme	APEH	>tr|C9JIF9|C9JIF9_HUMAN Acylamino-acid-releasing enzyme OS=Homo sapiens GN=APEH PE=1 SV=1;>sp|P13798|ACPH_HUMAN Acylamino-acid-releasing enzyme OS=Homo sapiens GN=APEH PE=1 SV=4	ENSG00000164062	ENSP00000296456;ENSP00000415862	ACPH_HUMAN;C9JIF9_HUMAN	Not Sig	logFC < 2.0	UNCERTAIN
483	27.6269	27.6815	27.2227	27.8813	27.1865	27.9051	27.8352	28.1398	NA	NA	NA	NA	NA	619	0.274491	0.659884	0.163542	0.0728021	C9JIZ6;P07602;Q5BJH1;A0A0J9YXB8	C9JIZ6;P07602;Q5BJH1	Prosaposin;Saposin-A;Saposin-B-Val;Saposin-B;Saposin-C;Saposin-D	PSAP	>tr|C9JIZ6|C9JIZ6_HUMAN Prosaposin OS=Homo sapiens GN=PSAP PE=1 SV=2;>sp|P07602|SAP_HUMAN Prosaposin OS=Homo sapiens GN=PSAP PE=1 SV=2;>tr|Q5BJH1|Q5BJH1_HUMAN PSAP protein OS=Homo sapiens GN=PSAP PE=1 SV=1	ENSG00000197746	ENSP00000378392;ENSP00000378394	C9JIZ6_HUMAN;Q5BJH1_HUMAN;SAP_HUMAN	Not Sig	logFC < 2.0	UNCERTAIN
484	23.1552	23.4621	22.7504	23.237	22.6111	22.988	23.0498	23.3467	NA	NA	NA	NA	NA	620	0.301639	0.678738	-0.152295	-0.0688532	C9JJ19;P82930;A0A087WUZ8	C9JJ19;P82930;A0A087WUZ8	28S ribosomal protein S34, mitochondrial	MRPS34	>tr|C9JJ19|C9JJ19_HUMAN 28S ribosomal protein S34, mitochondrial OS=Homo sapiens GN=MRPS34 PE=1 SV=2;>sp|P82930|RT34_HUMAN 28S ribosomal protein S34, mitochondrial OS=Homo sapiens GN=MRPS34 PE=1 SV=2;>tr|A0A087WUZ8|A0A087WUZ8_HUMAN 28S ribosomal protein S3	ENSG00000074071	ENSP00000177742;ENSP00000380531	C9JJ19_HUMAN;RT34_HUMAN	Not Sig	logFC < 2.0	UNCERTAIN
485	24.8642	25.0305	24.5801	24.9353	24.9817	24.9426	25.2583	25.0175	NA	NA	NA	NA	NA	624	0.819067	0.586355	0.197444	0.0931234	C9JLU1;P52434	C9JLU1;P52434	DNA-directed RNA polymerases I, II, and III subunit RPABC3	POLR2H	>tr|C9JLU1|C9JLU1_HUMAN DNA-directed RNA polymerases I, II, and III subunit RPABC3 (Fragment) OS=Homo sapiens GN=POLR2H PE=1 SV=7;>sp|P52434|RPAB3_HUMAN DNA-directed RNA polymerases I, II, and III subunit RPABC3 OS=Homo sapiens GN=POLR2H PE=1 SV=4	ENSG00000163882	ENSP00000296223;ENSP00000392913;ENSP00000409065	C9JLU1_HUMAN;RPAB3_HUMAN	Not Sig	logFC < 2.0	UNCERTAIN
486	25.0163	24.9858	24.233	25.0728	24.4115	24.7316	24.7431	25.3731	NA	NA	NA	NA	NA	625	0.0144851	0.984617	-0.0121293	-0.00531302	I3L2L5;I3L4Q0;C9JLW8;I3L317;I3L3A7	I3L2L5;I3L4Q0;C9JLW8;I3L317	Protein FAM195B	FAM195B	>tr|I3L2L5|I3L2L5_HUMAN Mapk-regulated corepressor-interacting protein 1 OS=Homo sapiens GN=FAM195B PE=1 SV=1;>tr|I3L4Q0|I3L4Q0_HUMAN HCG1818442, isoform CRA_a OS=Homo sapiens GN=FAM195B PE=1 SV=1;>sp|C9JLW8|F195B_HUMAN Mapk-regulated corepressor-interacti	ENSG00000225663	ENSP00000409009;ENSP00000445543;ENSP00000458707;ENSP00000458720;ENSP00000459769;ENSP00000460100;ENSP00000460461;ENSP00000461433	F195B_HUMAN;I3L2L5_HUMAN;I3L317_HUMAN;I3L4Q0_HUMAN	Not Sig	logFC < 2.0	UNCERTAIN
487	24.2721	24.0859	24.3971	23.9092	24.7295	24.3243	24.2958	24.0043	NA	NA	NA	NA	NA	627	0.416102	0.639777	0.17236	0.0789409	C9JME2;Q9Y4F1;M0QYB0;M0QXT1;H0Y783;M0R262	C9JME2;Q9Y4F1	FERM, RhoGEF and pleckstrin domain-containing protein 1	FARP1	>tr|C9JME2|C9JME2_HUMAN FERM, RhoGEF and pleckstrin domain-containing protein 1 OS=Homo sapiens GN=FARP1 PE=1 SV=2;>sp|Q9Y4F1|FARP1_HUMAN FERM, RhoGEF and pleckstrin domain-containing protein 1 OS=Homo sapiens GN=FARP1 PE=1 SV=1	ENSG00000152767	ENSP00000322926;ENSP00000365765;ENSP00000365771;ENSP00000471242	C9JME2_HUMAN;FARP1_HUMAN	Not Sig	logFC < 2.0	UNCERTAIN
488	26.9394	27.0417	27.4066	27.2307	27.4124	27.0377	26.8837	26.806	NA	NA	NA	NA	NA	629	0.29455	0.737617	-0.11965	-0.0551427	C9JXB8;C9JNW5;P83731	C9JXB8;C9JNW5;P83731	60S ribosomal protein L24	RPL24	>tr|C9JXB8|C9JXB8_HUMAN 60S ribosomal protein L24 OS=Homo sapiens GN=RPL24 PE=1 SV=1;>tr|C9JNW5|C9JNW5_HUMAN 60S ribosomal protein L24 OS=Homo sapiens GN=RPL24 PE=1 SV=1;>sp|P83731|RL24_HUMAN 60S ribosomal protein L24 OS=Homo sapiens GN=RPL24 PE=1 SV=1	ENSG00000114391	ENSP00000377640;ENSP00000419179;ENSP00000420380	C9JNW5_HUMAN;C9JXB8_HUMAN;RL24_HUMAN	Not Sig	logFC < 2.0	UNCERTAIN
489	25.1301	25.2507	25.1321	25.1169	24.8625	24.7177	24.7942	24.7597	NA	NA	NA	NA	NA	631	3.85102	0.351101	-0.373948	-0.18297	C9JP16;O75718	C9JP16;O75718	Cartilage-associated protein	CRTAP	>tr|C9JP16|C9JP16_HUMAN Cartilage-associated protein OS=Homo sapiens GN=CRTAP PE=1 SV=1;>sp|O75718|CRTAP_HUMAN Cartilage-associated protein OS=Homo sapiens GN=CRTAP PE=1 SV=1	ENSG00000170275	ENSP00000323696;ENSP00000409997	C9JP16_HUMAN;CRTAP_HUMAN	Not Sig	logFC < 2.0	UNCERTAIN
490	24.0636	24.3092	23.863	24.3907	23.9871	24.1687	24.3209	24.3372	NA	NA	NA	NA	NA	633	0.120486	0.896674	0.0468521	0.0218415	C9JQD4;O43447;H0YEL5;A6NM32	C9JQD4;O43447;H0YEL5	Peptidyl-prolyl cis-trans isomerase;Peptidyl-prolyl cis-trans isomerase H	PPIH	>tr|C9JQD4|C9JQD4_HUMAN Peptidyl-prolyl cis-trans isomerase (Fragment) OS=Homo sapiens GN=PPIH PE=1 SV=1;>sp|O43447|PPIH_HUMAN Peptidyl-prolyl cis-trans isomerase H OS=Homo sapiens GN=PPIH PE=1 SV=1;>tr|H0YEL5|H0YEL5_HUMAN Peptidyl-prolyl cis-trans isomera	ENSG00000171960	ENSP00000306614;ENSP00000402836;ENSP00000436091	C9JQD4_HUMAN;H0YEL5_HUMAN;PPIH_HUMAN	Not Sig	logFC < 2.0	UNCERTAIN
491	23.8307	23.2947	23.6644	23.8403	23.4313	23.3203	23.51	23.6711	NA	NA	NA	NA	NA	635	0.550843	0.630385	-0.174343	-0.0811924	E7ETT4;E7EUY3;E7ETT1;E9PDR0;C9JQS9;E7EX59;P05166;E9PEC3;F8WBI9;E7ENC1;H7C5C9;C9JVY9	E7ETT4;E7EUY3;E7ETT1;E9PDR0;C9JQS9;E7EX59;P05166;E9PEC3;F8WBI9	Propionyl-CoA carboxylase beta chain, mitochondrial	PCCB	>tr|E7ETT4|E7ETT4_HUMAN Propionyl-CoA carboxylase beta chain, mitochondrial OS=Homo sapiens GN=PCCB PE=1 SV=1;>tr|E7EUY3|E7EUY3_HUMAN Propionyl-CoA carboxylase beta chain, mitochondrial OS=Homo sapiens GN=PCCB PE=1 SV=1;>tr|E7ETT1|E7ETT1_HUMAN Propionyl-Co	ENSG00000114054	ENSP00000251654;ENSP00000417253;ENSP00000417549;ENSP00000417937;ENSP00000418307;ENSP00000419027;ENSP00000419129;ENSP00000420158;ENSP00000420391;ENSP00000420639	C9JQS9_HUMAN;E7ETT1_HUMAN;E7ETT4_HUMAN;E7EUY3_HUMAN;E7EX59_HUMAN;E9PDR0_HUMAN;E9PEC3_HUMAN;F8WBI9_HUMAN;PCCB_HUMAN	Not Sig	logFC < 2.0	UNCERTAIN
492	24.5267	24.6565	24.7905	24.9959	24.191	24.3457	24.3425	24.9741	NA	NA	NA	NA	NA	636	0.669592	0.478975	-0.279074	-0.126805	C9JQV0;Q9BRJ6;H7C0T1;H7C2R9	C9JQV0;Q9BRJ6;H7C0T1;H7C2R9	Uncharacterized protein C7orf50	C7orf50	>tr|C9JQV0|C9JQV0_HUMAN Uncharacterized protein C7orf50 (Fragment) OS=Homo sapiens GN=C7orf50 PE=1 SV=1;>sp|Q9BRJ6|CG050_HUMAN Uncharacterized protein C7orf50 OS=Homo sapiens GN=C7orf50 PE=1 SV=1;>tr|H7C0T1|H7C0T1_HUMAN Uncharacterized protein C7orf50 (Fra	ENSG00000146540	ENSP00000350011;ENSP00000380286;ENSP00000380288;ENSP00000396542;ENSP00000407380;ENSP00000420130	C9JQV0_HUMAN;CG050_HUMAN;H7C0T1_HUMAN;H7C2R9_HUMAN	Not Sig	logFC < 2.0	UNCERTAIN
493	22.0476	21.9582	22.0718	21.8202	23.0058	22.7281	22.7563	22.5507	NA	NA	NA	NA	NA	637	3.42942	0.116824	0.785791	0.372481	C9JRJ5;Q9UGP4	C9JRJ5;Q9UGP4	LIM domain-containing protein 1	LIMD1	>tr|C9JRJ5|C9JRJ5_HUMAN LIM domain-containing protein 1 OS=Homo sapiens GN=LIMD1 PE=1 SV=1;>sp|Q9UGP4|LIMD1_HUMAN LIM domain-containing protein 1 OS=Homo sapiens GN=LIMD1 PE=1 SV=1	ENSG00000144791	ENSP00000273317;ENSP00000394537	C9JRJ5_HUMAN;LIMD1_HUMAN	Not Sig	logFC < 2.0	UNCERTAIN
494	25.4062	25.2199	24.8599	25.2724	24.1438	25.1697	24.8789	25.8137	NA	NA	NA	NA	NA	641	0.204014	0.636873	-0.188077	-0.0795118	C9JRZ6;Q9NX63;F8WAR4;F8WD73	C9JRZ6;Q9NX63;F8WAR4	MICOS complex subunit MIC19	CHCHD3	>tr|C9JRZ6|C9JRZ6_HUMAN MICOS complex subunit OS=Homo sapiens GN=CHCHD3 PE=1 SV=1;>sp|Q9NX63|MIC19_HUMAN MICOS complex subunit MIC19 OS=Homo sapiens GN=CHCHD3 PE=1 SV=1;>tr|F8WAR4|F8WAR4_HUMAN MICOS complex subunit OS=Homo sapiens GN=CHCHD3 PE=1 SV=1	ENSG00000106554	ENSP00000262570;ENSP00000389297;ENSP00000410425	C9JRZ6_HUMAN;CHCH3_HUMAN;F8WAR4_HUMAN	Not Sig	logFC < 2.0	UNCERTAIN
495	24.1595	23.9731	23.2063	23.9828	23.9463	24.1805	23.7395	24.1384	NA	NA	NA	NA	NA	645	0.305228	0.64904	0.170748	0.0763904	C9JVB6;Q7L0Y3	C9JVB6;Q7L0Y3	Mitochondrial ribonuclease P protein 1	TRMT10C	>tr|C9JVB6|C9JVB6_HUMAN Mitochondrial ribonuclease P protein 1 (Fragment) OS=Homo sapiens GN=TRMT10C PE=1 SV=1;>sp|Q7L0Y3|MRRP1_HUMAN Mitochondrial ribonuclease P protein 1 OS=Homo sapiens GN=TRMT10C PE=1 SV=2	ENSG00000174173	ENSP00000312356;ENSP00000419389	C9JVB6_HUMAN;MRRP1_HUMAN	Not Sig	logFC < 2.0	UNCERTAIN
496	22.1599	22.093	22.4457	22.556	22.1084	21.8354	22.3593	21.861	NA	NA	NA	NA	NA	647	0.821656	0.478724	-0.272631	-0.125892	C9JXC3;Q9Y530;H7C5Q1;C9J5P1;C9JNE2	C9JXC3;Q9Y530;H7C5Q1;C9J5P1;C9JNE2	O-acetyl-ADP-ribose deacetylase 1	OARD1	>tr|C9JXC3|C9JXC3_HUMAN O-acetyl-ADP-ribose deacetylase 1 OS=Homo sapiens GN=OARD1 PE=1 SV=1;>sp|Q9Y530|OARD1_HUMAN O-acetyl-ADP-ribose deacetylase 1 OS=Homo sapiens GN=OARD1 PE=1 SV=2;>tr|H7C5Q1|H7C5Q1_HUMAN O-acetyl-ADP-ribose deacetylase 1 (Fragment) OS	ENSG00000124596	ENSP00000362247;ENSP00000416829;ENSP00000418400;ENSP00000419175;ENSP00000420193;ENSP00000420414;ENSP00000420472;ENSP00000420484;ENSP00000420601	C9J5P1_HUMAN;C9JNE2_HUMAN;C9JXC3_HUMAN;H7C5Q1_HUMAN;OARD1_HUMAN	Not Sig	logFC < 2.0	UNCERTAIN
497	23.1897	21.2869	21.012	23.0068	23.3918	23.5012	23.6365	23.4996	NA	NA	NA	NA	NA	654	1.29232	0.0373143	1.38342	0.538546	H7C4M9;C9JZG9;C9JZY6;P62256	H7C4M9;C9JZG9;C9JZY6;P62256	Ubiquitin-conjugating enzyme E2 H	UBE2H	>tr|H7C4M9|H7C4M9_HUMAN Ubiquitin-conjugating enzyme E2 H (Fragment) OS=Homo sapiens GN=UBE2H PE=1 SV=1;>tr|C9JZG9|C9JZG9_HUMAN Ubiquitin-conjugating enzyme E2 H (Fragment) OS=Homo sapiens GN=UBE2H PE=1 SV=1;>tr|C9JZY6|C9JZY6_HUMAN Ubiquitin-conjugating en	ENSG00000186591	ENSP00000347836;ENSP00000417709;ENSP00000419097;ENSP00000419689;ENSP00000419750	C9JZG9_HUMAN;C9JZY6_HUMAN;H7C4M9_HUMAN;UBE2H_HUMAN	Not Sig	logFC < 2.0	UNCERTAIN
498	26.8751	26.771	26.7787	26.7862	27.7983	27.7762	27.9021	27.8921	NA	NA	NA	NA	NA	655	6.65207	0.0437913	1.03942	0.509451	C9JZR2;O60716;E9PRE2;H0YC95;E9PKY0;E9PKL1	C9JZR2;O60716	Catenin delta-1	CTNND1	>tr|C9JZR2|C9JZR2_HUMAN Catenin delta-1 OS=Homo sapiens GN=CTNND1 PE=1 SV=2;>sp|O60716|CTND1_HUMAN Catenin delta-1 OS=Homo sapiens GN=CTNND1 PE=1 SV=1	ENSG00000198561	ENSP00000351527;ENSP00000353902;ENSP00000354785;ENSP00000354823;ENSP00000354907;ENSP00000381996;ENSP00000382004;ENSP00000403518;ENSP00000409930;ENSP00000413586;ENSP00000432041;ENSP00000432075;ENSP00000432243;ENSP00000432623;ENSP00000433158;ENSP00000433276;ENSP00000433334;ENSP00000434017;ENSP00000434672;ENSP00000434808;ENSP00000434900;ENSP00000434949;ENSP00000435266;ENSP00000435379;ENSP00000435494…	C9JZR2_HUMAN;CTND1_HUMAN	Not Sig	logFC < 2.0	UNCERTAIN
499	29.0819	29.0948	28.9752	29.358	29.12	30.2108	29.9928	29.9948	NA	NA	+	NA	NA	662	1.47755	0.175992	0.702107	0.31131	CON__P02769;H0YA55;A0A0C4DGB6;CON__P02768-1;P02768;A0A087WWT3;C9JKR2;D6RHD5;B7WNR0;H7C013;CON__Q3SZ57	CON__P02769	NA	NA	>P02769 SWISS-PROT:P02769 (Bos taurus) Bovine serum albumin precursor	NA	NA	NA	Not Sig	logFC < 2.0	UNCERTAIN
500	21.3326	24.6043	24.4456	27.1644	24.0234	24.016	25.2243	23.808	NA	NA	+	NA	NA	664	0.0331197	0.823796	-0.11881	-0.0367107	CON__P04264;P04264;CON__Q6IFZ6;CON__ENSEMBL:ENSBTAP00000038253;CON__Q7Z794;Q7Z794	CON__P04264;P04264	Keratin, type II cytoskeletal 1	KRT1	>P04264 SWISS-PROT:P04264 Tax_Id=9606 Gene_Symbol=KRT1 Keratin, type II cytoskeletal 1;>sp|P04264|K2C1_HUMAN Keratin, type II cytoskeletal 1 OS=Homo sapiens GN=KRT1 PE=1 SV=6	ENSG00000167768	ENSP00000252244	K2C1_HUMAN	Not Sig	logFC < 2.0	UNCERTAIN
501	20.9897	24.7676	24.2238	28.3522	21.4353	23.7636	24.5648	23.8229	NA	NA	+	NA	NA	666	0.301074	0.163113	-1.18665	-0.324795	CON__P13645;P13645;CON__Q7Z3Z0;CON__Q7Z3Y8;CON__Q148H6;CON__Q7Z3Y7;Q7Z3Z0;Q7Z3Y8;Q7Z3Y7	CON__P13645;P13645	Keratin, type I cytoskeletal 10	KRT10	>P13645 SWISS-PROT:P13645 Tax_Id=9606 Gene_Symbol=KRT10 Keratin, type I cytoskeletal 10;>sp|P13645|K1C10_HUMAN Keratin, type I cytoskeletal 10 OS=Homo sapiens GN=KRT10 PE=1 SV=6	ENSG00000186395	ENSP00000269576	K1C10_HUMAN	Not Sig	logFC < 2.0	UNCERTAIN
502	22.6759	21.4697	22.18	22.859	21.4067	21.6705	19.7454	19.9408	NA	NA	+	NA	NA	667	1.47826	0.0223902	-1.60532	-0.621365	CON__P15497;F8W696;P02647	CON__P15497	NA	NA	>P15497 SWISS-PROT:P15497 (Bos taurus) Apolipoprotein A-I precursor	NA	NA	NA	Not Sig	logFC < 2.0	UNCERTAIN
503	31.8729	31.5125	31.0021	31.7645	31.0032	32.0302	31.8356	32.1702	NA	NA	+	NA	NA	668	0.283203	0.577302	0.22182	0.0953874	CON__P15636	CON__P15636	NA	NA	>P15636 SWISS-PROT:P15636 Protease I precursor Lysyl endopeptidase Achromobacter lyticus.	NA	NA	NA	Not Sig	logFC < 2.0	UNCERTAIN
504	20.9112	22.3326	22.5495	24.9183	22.9074	22.372	23.7599	22.5659	NA	NA	+	NA	NA	669	0.0919362	0.645112	0.223388	0.0774218	CON__P35527;P35527;K7EQQ3	CON__P35527;P35527	Keratin, type I cytoskeletal 9	KRT9	>P35527 SWISS-PROT:P35527 Tax_Id=9606 Gene_Symbol=KRT9 Keratin, type I cytoskeletal 9;>sp|P35527|K1C9_HUMAN Keratin, type I cytoskeletal 9 OS=Homo sapiens GN=KRT9 PE=1 SV=3	ENSG00000171403	ENSP00000246662	K1C9_HUMAN	Not Sig	logFC < 2.0	UNCERTAIN
505	22.3308	24.9261	24.5331	27.8439	22.8223	23.9232	23.9443	24.2458	NA	NA	+	NA	NA	670	0.448328	0.117199	-1.17458	-0.369915	CON__P35908;P35908;CON__Q3TTY5	CON__P35908;P35908	Keratin, type II cytoskeletal 2 epidermal	KRT2	>P35908 SWISS-PROT:P35908 Tax_Id=9606 Gene_Symbol=KRT2 Keratin, type II cytoskeletal 2 epidermal;>sp|P35908|K22E_HUMAN Keratin, type II cytoskeletal 2 epidermal OS=Homo sapiens GN=KRT2 PE=1 SV=2	ENSG00000172867	ENSP00000310861	K22E_HUMAN	Not Sig	logFC < 2.0	UNCERTAIN
506	22.7725	23.7416	23.6563	23.526	22.3967	23.3828	23.6743	23.0692	NA	NA	+	NA	NA	672	0.359318	0.483255	-0.293346	-0.124694	E9PFT6;CON__Q3SX09;P68871;P02042;A8MUF7;F8W6P5;E9PEW8;E9PBW4;CON__P02070;P69892;P69891;P02100	E9PFT6;CON__Q3SX09;P68871;P02042;A8MUF7;F8W6P5;E9PEW8;E9PBW4;CON__P02070;P69892;P69891;P02100	Hemoglobin subunit beta;LVV-hemorphin-7;Spinorphin;Hemoglobin subunit delta;Hemoglobin subunit gamma-2;Hemoglobin subunit gamma-1;Hemoglobin subunit epsilon	HBD;HBB;HBE1;HBG2;HBG1	>tr|E9PFT6|E9PFT6_HUMAN Hemoglobin subunit delta OS=Homo sapiens GN=HBD PE=1 SV=1;>Q3SX09 TREMBL:Q3SX09 (Bos taurus) similar to HBG protein;>sp|P68871|HBB_HUMAN Hemoglobin subunit beta OS=Homo sapiens GN=HBB PE=1 SV=2;>sp|P02042|HBD_HUMAN Hemoglobin subuni	ENSG00000196565;ENSG00000213931;ENSG00000213934;ENSG00000223609;ENSG00000244734	ENSP00000292896;ENSP00000292901;ENSP00000327431;ENSP00000333994;ENSP00000338082;ENSP00000369586;ENSP00000369602;ENSP00000369609;ENSP00000369654;ENSP00000369671;ENSP00000380104;ENSP00000393810	A8MUF7_HUMAN;E9PBW4_HUMAN;E9PEW8_HUMAN;E9PFT6_HUMAN;F8W6P5_HUMAN;HBB_HUMAN;HBD_HUMAN;HBE_HUMAN;HBG1_HUMAN;HBG2_HUMAN	Not Sig	logFC < 2.0	UNCERTAIN
507	22.1862	22.2102	22.5095	22.1174	21.9405	22.3758	20.9641	21.3667	NA	NA	NA	NA	NA	676	0.937417	0.230823	-0.594054	-0.255728	D3DPN2;O75056	D3DPN2;O75056	Syndecan;Syndecan-3	SDC3	>tr|D3DPN2|D3DPN2_HUMAN Syndecan OS=Homo sapiens GN=SDC3 PE=1 SV=1;>sp|O75056|SDC3_HUMAN Syndecan-3 OS=Homo sapiens GN=SDC3 PE=1 SV=2	ENSG00000162512	ENSP00000338346;ENSP00000344468	D3DPN2_HUMAN;SDC3_HUMAN	Not Sig	logFC < 2.0	UNCERTAIN
508	23.2161	22.8136	22.5156	22.9201	23.0152	22.8514	22.9808	23.2004	NA	NA	NA	NA	NA	677	0.395551	0.683197	0.145607	0.0673615	D3DTX6;Q96SB3;Q9ULJ8	D3DTX6;Q96SB3	Neurabin-2	PPP1R9B	>tr|D3DTX6|D3DTX6_HUMAN Neurabin-2 OS=Homo sapiens GN=PPP1R9B PE=1 SV=1;>sp|Q96SB3|NEB2_HUMAN Neurabin-2 OS=Homo sapiens GN=PPP1R9B PE=1 SV=2	NA	NA	D3DTX6_HUMAN;NEB2_HUMAN	Not Sig	logFC < 2.0	UNCERTAIN
509	22.5205	22.0812	22.341	22.7652	21.6206	20.8038	19.912	22.0763	NA	NA	NA	NA	NA	678	1.42532	0.0397982	-1.32377	-0.52998	D3DTZ5;J3QSB9;P63272	D3DTZ5;J3QSB9;P63272	Transcription elongation factor SPT4	SUPT4H1	>tr|D3DTZ5|D3DTZ5_HUMAN Suppressor of Ty 4 homolog 1 (S. cerevisiae), isoform CRA_b OS=Homo sapiens GN=SUPT4H1 PE=1 SV=1;>tr|J3QSB9|J3QSB9_HUMAN Transcription elongation factor SPT4 OS=Homo sapiens GN=SUPT4H1 PE=1 SV=1;>sp|P63272|SPT4H_HUMAN Transcription	ENSG00000213246	ENSP00000225504;ENSP00000462100;ENSP00000462670;ENSP00000464618	D3DTZ5_HUMAN;J3QSB9_HUMAN;SPT4H_HUMAN	Not Sig	logFC < 2.0	UNCERTAIN
510	23.3615	22.9509	23.2572	23.5223	23.0999	23.1911	23.3309	23.5624	NA	NA	NA	NA	NA	679	0.0516711	0.95946	0.0230994	0.0107092	F6U1T9;D3YTA9;H7BYZ3;P63098;Q96LZ3	F6U1T9;D3YTA9;H7BYZ3;P63098	Calcineurin subunit B type 1	PPP3R1;WDR92	>tr|F6U1T9|F6U1T9_HUMAN Calcineurin subunit B type 1 OS=Homo sapiens GN=PPP3R1 PE=1 SV=1;>tr|D3YTA9|D3YTA9_HUMAN Calcineurin subunit B type 1 OS=Homo sapiens GN=PPP3R1 PE=1 SV=1;>tr|H7BYZ3|H7BYZ3_HUMAN Uncharacterized protein OS=Homo sapiens PE=4 SV=1;>sp|	ENSG00000221823	ENSP00000234310;ENSP00000384974;ENSP00000387148;ENSP00000387216	CANB1_HUMAN;D3YTA9_HUMAN;F6U1T9_HUMAN;H7BYZ3_HUMAN	Not Sig	logFC < 2.0	UNCERTAIN
511	27.2203	26.9834	27.279	27.1724	27.0352	26.9119	27.0759	26.7563	NA	NA	NA	NA	NA	680	1.19948	0.545392	-0.218909	-0.104432	D3YTB1;F8W727;P62910;D3YTI8	D3YTB1;F8W727;P62910	60S ribosomal protein L32	RPL32	>tr|D3YTB1|D3YTB1_HUMAN 60S ribosomal protein L32 (Fragment) OS=Homo sapiens GN=RPL32 PE=1 SV=1;>tr|F8W727|F8W727_HUMAN 60S ribosomal protein L32 OS=Homo sapiens GN=RPL32 PE=1 SV=1;>sp|P62910|RL32_HUMAN 60S ribosomal protein L32 OS=Homo sapiens GN=RPL32 PE	ENSG00000144713	ENSP00000339064;ENSP00000380156;ENSP00000380158;ENSP00000388674;ENSP00000412393;ENSP00000416429	D3YTB1_HUMAN;F8W727_HUMAN;RL32_HUMAN	Not Sig	logFC < 2.0	UNCERTAIN
512	25.578	25.5285	25.6776	25.1978	24.8307	24.7207	24.8478	24.7104	NA	NA	NA	NA	NA	685	3.20962	0.145231	-0.718084	-0.340323	D6R938;E9PBG7;E9PF82;Q13557;H0Y9J2;H0Y9C2;Q9UQM7;D6RHX9;E9PBE8;E7EQE4	D6R938;E9PBG7;E9PF82;Q13557;H0Y9J2;H0Y9C2	Calcium/calmodulin-dependent protein kinase type II subunit delta	CAMK2D	>tr|D6R938|D6R938_HUMAN Calcium/calmodulin-dependent protein kinase (CaM kinase) II delta, isoform CRA_e OS=Homo sapiens GN=CAMK2D PE=1 SV=1;>tr|E9PBG7|E9PBG7_HUMAN Calcium/calmodulin-dependent protein kinase type II subunit delta OS=Homo sapiens GN=CAMK2D	ENSG00000145349	ENSP00000296402;ENSP00000339740;ENSP00000369098;ENSP00000378030;ENSP00000378032;ENSP00000378034;ENSP00000406131;ENSP00000415248;ENSP00000415707;ENSP00000422566;ENSP00000423482;ENSP00000423677;ENSP00000423753;ENSP00000424245;ENSP00000424247;ENSP00000425824	D6R938_HUMAN;E9PBG7_HUMAN;E9PF82_HUMAN;H0Y9C2_HUMAN;H0Y9J2_HUMAN;KCC2D_HUMAN	Not Sig	logFC < 2.0	UNCERTAIN
513	22.5454	21.2674	21.7915	22.6826	21.5652	19.7398	22.4302	20.6275	NA	NA	NA	NA	NA	691	0.713802	0.118098	-0.98107	-0.367483	D6R9W2;Q8NEC7;D6RCC4;D6RCC9	D6R9W2;Q8NEC7	Glutathione S-transferase C-terminal domain-containing protein	GSTCD	>tr|D6R9W2|D6R9W2_HUMAN Glutathione S-transferase C-terminal domain-containing protein OS=Homo sapiens GN=GSTCD PE=1 SV=1;>sp|Q8NEC7|GSTCD_HUMAN Glutathione S-transferase C-terminal domain-containing protein OS=Homo sapiens GN=GSTCD PE=1 SV=2	ENSG00000138780	ENSP00000353695;ENSP00000378216;ENSP00000378218;ENSP00000422354;ENSP00000422858	D6R9W2_HUMAN;GSTCD_HUMAN	Not Sig	logFC < 2.0	UNCERTAIN
514	22.8902	22.9054	22.9968	22.9541	22.9411	22.9278	22.6505	22.9972	NA	NA	NA	NA	NA	693	0.295378	0.86724	-0.0574813	-0.0276167	D6RAA6;P57088;H0Y8N0	D6RAA6;P57088;H0Y8N0	Transmembrane protein 33	TMEM33	>tr|D6RAA6|D6RAA6_HUMAN Transmembrane protein 33 (Fragment) OS=Homo sapiens GN=TMEM33 PE=1 SV=1;>sp|P57088|TMM33_HUMAN Transmembrane protein 33 OS=Homo sapiens GN=TMEM33 PE=1 SV=2;>tr|H0Y8N0|H0Y8N0_HUMAN Transmembrane protein 33 (Fragment) OS=Homo sapiens	ENSG00000109133	ENSP00000421546;ENSP00000422473;ENSP00000422810;ENSP00000427006;ENSP00000441455	D6RAA6_HUMAN;H0Y8N0_HUMAN;TMM33_HUMAN	Not Sig	logFC < 2.0	UNCERTAIN
515	23.1852	22.8335	22.3954	22.8158	22.4765	22.9023	22.5461	23.0673	NA	NA	NA	NA	NA	696	0.101593	0.870806	-0.0593882	-0.0268147	D6RBJ9;P32321;D6R9S0;D6RBN2;D6RAR9;D6RC36;D6RAD7	D6RBJ9;P32321;D6R9S0;D6RBN2;D6RAR9;D6RC36	Deoxycytidylate deaminase	DCTD	>tr|D6RBJ9|D6RBJ9_HUMAN Deoxycytidylate deaminase (Fragment) OS=Homo sapiens GN=DCTD PE=1 SV=1;>sp|P32321|DCTD_HUMAN Deoxycytidylate deaminase OS=Homo sapiens GN=DCTD PE=1 SV=2;>tr|D6R9S0|D6R9S0_HUMAN Deoxycytidylate deaminase (Fragment) OS=Homo sapiens GN	ENSG00000129187	ENSP00000349576;ENSP00000398194;ENSP00000421792;ENSP00000422662;ENSP00000423182;ENSP00000423894;ENSP00000424017;ENSP00000424050	D6R9S0_HUMAN;D6RAR9_HUMAN;D6RBJ9_HUMAN;D6RBN2_HUMAN;D6RC36_HUMAN;DCTD_HUMAN	Not Sig	logFC < 2.0	UNCERTAIN
516	24.8218	24.2607	24.2864	24.5812	23.819	24.1386	24.2199	24.1964	NA	NA	NA	NA	NA	700	1.28923	0.352165	-0.39404	-0.182227	D6RCF4;Q8N5K1	D6RCF4;Q8N5K1	CDGSH iron-sulfur domain-containing protein 2	CISD2	>tr|D6RCF4|D6RCF4_HUMAN CDGSH iron-sulfur domain-containing protein 2 OS=Homo sapiens GN=CISD2 PE=1 SV=1;>sp|Q8N5K1|CISD2_HUMAN CDGSH iron-sulfur domain-containing protein 2 OS=Homo sapiens GN=CISD2 PE=1 SV=1	ENSG00000145354	ENSP00000273986;ENSP00000423716	CISD2_HUMAN;D6RCF4_HUMAN	Not Sig	logFC < 2.0	UNCERTAIN
517	22.8082	22.9121	22.5891	22.7233	22.6505	22.7886	22.4678	23.3673	NA	NA	NA	NA	NA	701	0.108385	0.867967	0.060431	0.0273939	E5RIJ3;D6RCM8;O95379	E5RIJ3;D6RCM8;O95379	Tumor necrosis factor alpha-induced protein 8	TNFAIP8	>tr|E5RIJ3|E5RIJ3_HUMAN Tumor necrosis factor alpha-induced protein 8 (Fragment) OS=Homo sapiens GN=TNFAIP8 PE=1 SV=1;>tr|D6RCM8|D6RCM8_HUMAN Tumor necrosis factor alpha-induced protein 8 OS=Homo sapiens GN=TNFAIP8 PE=1 SV=1;>sp|O95379|TFIP8_HUMAN Tumor ne	ENSG00000145779	ENSP00000274456;ENSP00000421848;ENSP00000422245;ENSP00000427160;ENSP00000429432	D6RCM8_HUMAN;E5RIJ3_HUMAN;TFIP8_HUMAN	Not Sig	logFC < 2.0	UNCERTAIN
518	22.6921	22.4108	22.4075	20.4109	21.1996	22.9808	22.3653	22.9702	NA	NA	NA	NA	NA	705	0.240014	0.41677	0.39865	0.149122	D6REA0;O75879;H0Y9W6;D6RDU9	D6REA0;O75879	Glutamyl-tRNA(Gln) amidotransferase subunit B, mitochondrial	PET112	>tr|D6REA0|D6REA0_HUMAN Glutamyl-tRNA(Gln) amidotransferase subunit B, mitochondrial OS=Homo sapiens GN=GATB PE=1 SV=1;>sp|O75879|GATB_HUMAN Glutamyl-tRNA(Gln) amidotransferase subunit B, mitochondrial OS=Homo sapiens GN=GATB PE=1 SV=1	ENSG00000059691	ENSP00000263985;ENSP00000426859	D6REA0_HUMAN;GATB_HUMAN	Not Sig	logFC < 2.0	UNCERTAIN
519	28.0739	27.5873	27.579	27.9082	28.0429	28.0842	28.1303	28.1873	NA	NA	NA	NA	NA	707	1.36994	0.408089	0.324095	0.152416	D6RGI3;D6RER5;Q9NVA2;D6RDU5;H0Y961;D6RDP1;D6R9Y6;H0Y9G8	D6RGI3;D6RER5;Q9NVA2;D6RDU5	Septin-11	2016-09-11	>tr|D6RGI3|D6RGI3_HUMAN Septin 11, isoform CRA_b OS=Homo sapiens GN=SEPT11 PE=1 SV=1;>tr|D6RER5|D6RER5_HUMAN Septin-11 OS=Homo sapiens GN=SEPT11 PE=1 SV=1;>sp|Q9NVA2|SEP11_HUMAN Septin-11 OS=Homo sapiens GN=SEPT11 PE=1 SV=3;>tr|D6RDU5|D6RDU5_HUMAN Septin-1	ENSG00000138758	ENSP00000264893;ENSP00000420839;ENSP00000422896;ENSP00000424925;ENSP00000426344;ENSP00000443701	D6RDU5_HUMAN;D6RER5_HUMAN;D6RGI3_HUMAN;SEP11_HUMAN	Not Sig	logFC < 2.0	UNCERTAIN
520	26.8564	26.6591	26.6266	26.7936	26.6171	26.7459	26.7496	26.7652	NA	NA	NA	NA	NA	708	0.081121	0.979834	-0.0144887	-0.00701815	D6REX3;O94979;D6RHZ5;H7BXG7;H0YAB3;H0Y8V7;H0Y9K1;H0Y9T9;H0Y8W8;H0YAF5;H0Y9V3;D6RE64;D6RCQ9	D6REX3;O94979;D6RHZ5;H7BXG7	Protein transport protein Sec31A	SEC31A	>tr|D6REX3|D6REX3_HUMAN Protein transport protein Sec31A OS=Homo sapiens GN=SEC31A PE=1 SV=1;>sp|O94979|SC31A_HUMAN Protein transport protein Sec31A OS=Homo sapiens GN=SEC31A PE=1 SV=3;>tr|D6RHZ5|D6RHZ5_HUMAN Protein transport protein Sec31A OS=Homo sapien	ENSG00000138674	ENSP00000264405;ENSP00000309070;ENSP00000325087;ENSP00000337602;ENSP00000347329;ENSP00000378721;ENSP00000400926;ENSP00000407944;ENSP00000408027;ENSP00000421464;ENSP00000421633;ENSP00000424635;ENSP00000425999;ENSP00000426569;ENSP00000426886	D6REX3_HUMAN;D6RHZ5_HUMAN;H7BXG7_HUMAN;SC31A_HUMAN	Not Sig	logFC < 2.0	UNCERTAIN
521	23.1328	22.7493	22.9471	22.6308	22.4718	22.423	20.5951	22.2769	NA	NA	NA	NA	NA	709	1.02779	0.115614	-0.923307	-0.374699	D6RF48;Q9P2W9;D6RC71	D6RF48;Q9P2W9	Syntaxin-18	STX18	>tr|D6RF48|D6RF48_HUMAN Syntaxin-18 OS=Homo sapiens GN=STX18 PE=1 SV=1;>sp|Q9P2W9|STX18_HUMAN Syntaxin-18 OS=Homo sapiens GN=STX18 PE=1 SV=1	ENSG00000168818	ENSP00000305810;ENSP00000426648	D6RF48_HUMAN;STX18_HUMAN	Not Sig	logFC < 2.0	UNCERTAIN
522	22.4139	22.257	22.1685	22.2327	22.3644	22.4542	22.4118	22.1649	NA	NA	NA	NA	NA	710	0.43722	0.816857	0.0807767	0.0387881	D6RFG8;P27707;D6RCP9	D6RFG8;P27707;D6RCP9	Deoxycytidine kinase	DCK	>tr|D6RFG8|D6RFG8_HUMAN Deoxycytidine kinase OS=Homo sapiens GN=DCK PE=1 SV=1;>sp|P27707|DCK_HUMAN Deoxycytidine kinase OS=Homo sapiens GN=DCK PE=1 SV=1;>tr|D6RCP9|D6RCP9_HUMAN Deoxycytidine kinase OS=Homo sapiens GN=DCK PE=1 SV=1	ENSG00000156136	ENSP00000286648;ENSP00000421508;ENSP00000425578	D6RCP9_HUMAN;D6RFG8_HUMAN;DCK_HUMAN	Not Sig	logFC < 2.0	UNCERTAIN
523	23.5185	23.2977	23.3715	23.6896	23.2248	23.3231	23.2664	23.8168	NA	NA	NA	NA	NA	711	0.143548	0.863232	-0.0615048	-0.028438	D6RFW1;Q96EQ0	D6RFW1;Q96EQ0	Small glutamine-rich tetratricopeptide repeat-containing protein beta	SGTB	>tr|D6RFW1|D6RFW1_HUMAN Small glutamine-rich tetratricopeptide repeat-containing protein beta (Fragment) OS=Homo sapiens GN=SGTB PE=1 SV=1;>sp|Q96EQ0|SGTB_HUMAN Small glutamine-rich tetratricopeptide repeat-containing protein beta OS=Homo sapiens GN=SGTB P	ENSG00000197860	ENSP00000370395;ENSP00000421447	D6RFW1_HUMAN;SGTB_HUMAN	Not Sig	logFC < 2.0	UNCERTAIN
524	24.8119	24.6989	24.6744	24.8486	24.6556	25.1174	25.1055	25.2312	NA	NA	NA	NA	NA	712	1.03853	0.47847	0.269023	0.126064	D6RG15;Q6IBS0;H0Y858	D6RG15;Q6IBS0	Twinfilin-2	TWF2	>tr|D6RG15|D6RG15_HUMAN Twinfilin-2 OS=Homo sapiens GN=TWF2 PE=1 SV=1;>sp|Q6IBS0|TWF2_HUMAN Twinfilin-2 OS=Homo sapiens GN=TWF2 PE=1 SV=2	ENSG00000247596	ENSP00000303908;ENSP00000426464	D6RG15_HUMAN;TWF2_HUMAN	Not Sig	logFC < 2.0	UNCERTAIN
525	21.0469	20.8411	20.9187	20.9679	19.7227	20.9575	20.9164	20.9425	NA	NA	NA	NA	NA	713	0.451601	0.458125	-0.308866	-0.13387	D6RHI7;D6RG18;P51946	D6RHI7;D6RG18;P51946	Cyclin-H	CCNH	>tr|D6RHI7|D6RHI7_HUMAN Cyclin-H OS=Homo sapiens GN=CCNH PE=1 SV=1;>tr|D6RG18|D6RG18_HUMAN Cyclin-H OS=Homo sapiens GN=CCNH PE=1 SV=1;>sp|P51946|CCNH_HUMAN Cyclin-H OS=Homo sapiens GN=CCNH PE=1 SV=1	ENSG00000134480	ENSP00000256897;ENSP00000426075;ENSP00000426454	CCNH_HUMAN;D6RG18_HUMAN;D6RHI7_HUMAN	Not Sig	logFC < 2.0	UNCERTAIN
526	23.6459	23.2101	23.4801	23.3752	21.8106	23.7313	21.1332	21.1684	NA	NA	NA	NA	NA	714	1.25969	0.0318974	-1.46697	-0.56052	D6RGG3;Q99715;A0A087X0A8;H0Y4P7;H0Y5N9	D6RGG3;Q99715;A0A087X0A8	Collagen alpha-1(XII) chain	COL12A1	>tr|D6RGG3|D6RGG3_HUMAN Collagen alpha-1(XII) chain OS=Homo sapiens GN=COL12A1 PE=1 SV=1;>sp|Q99715|COCA1_HUMAN Collagen alpha-1(XII) chain OS=Homo sapiens GN=COL12A1 PE=1 SV=2;>tr|A0A087X0A8|A0A087X0A8_HUMAN Collagen alpha-1(XII) chain OS=Homo sapiens GN=	ENSG00000111799	ENSP00000305147;ENSP00000325146;ENSP00000412864;ENSP00000421216	COCA1_HUMAN;D6RGG3_HUMAN	Not Sig	logFC < 2.0	UNCERTAIN
527	23.6202	23.7371	23.9047	23.4161	23.8582	23.4799	23.3932	23.5799	NA	NA	NA	NA	NA	717	0.261417	0.79527	-0.0917044	-0.0427725	D6RGX2;Q9NUQ7;D6RB53;D6RA67;H0YA18	D6RGX2;Q9NUQ7;D6RB53;D6RA67;H0YA18	Ufm1-specific protease 2	UFSP2	>tr|D6RGX2|D6RGX2_HUMAN Ufm1-specific protease 2 OS=Homo sapiens GN=UFSP2 PE=1 SV=1;>sp|Q9NUQ7|UFSP2_HUMAN Ufm1-specific protease 2 OS=Homo sapiens GN=UFSP2 PE=1 SV=3;>tr|D6RB53|D6RB53_HUMAN Ufm1-specific protease 2 OS=Homo sapiens GN=UFSP2 PE=1 SV=1;>tr|D	ENSG00000109775	ENSP00000264689;ENSP00000421133;ENSP00000423108;ENSP00000424419;ENSP00000425855	D6RA67_HUMAN;D6RB53_HUMAN;D6RGX2_HUMAN;H0YA18_HUMAN;UFSP2_HUMAN	Not Sig	logFC < 2.0	UNCERTAIN
528	21.702	20.9634	21.8407	21.7741	21.6765	21.6298	21.7663	21.8048	NA	NA	NA	NA	NA	718	0.301049	0.682623	0.149329	0.0676278	D6RHD3;Q9BS16;D6RC76;D6RJF0	D6RHD3;Q9BS16;D6RC76;D6RJF0	Centromere protein K	CENPK	>tr|D6RHD3|D6RHD3_HUMAN Centromere protein K OS=Homo sapiens GN=CENPK PE=1 SV=1;>sp|Q9BS16|CENPK_HUMAN Centromere protein K OS=Homo sapiens GN=CENPK PE=1 SV=1;>tr|D6RC76|D6RC76_HUMAN Centromere protein K (Fragment) OS=Homo sapiens GN=CENPK PE=1 SV=1;>tr|D6	ENSG00000123219	ENSP00000242872;ENSP00000379911;ENSP00000421034;ENSP00000422365;ENSP00000422421;ENSP00000425686	CENPK_HUMAN;D6RC76_HUMAN;D6RHD3_HUMAN;D6RJF0_HUMAN	Not Sig	logFC < 2.0	UNCERTAIN
529	23.709	23.6843	23.5011	23.6851	23.7867	23.7368	23.6239	23.7477	NA	NA	NA	NA	NA	719	0.630771	0.820005	0.0788684	0.0382928	D6RIY6;Q06265;D6R905;D6RAP4;H0Y9L5;D6RA17	D6RIY6;Q06265;D6R905	Exosome complex component RRP45	EXOSC9	>tr|D6RIY6|D6RIY6_HUMAN Exosome complex component RRP45 OS=Homo sapiens GN=EXOSC9 PE=1 SV=1;>sp|Q06265|EXOS9_HUMAN Exosome complex component RRP45 OS=Homo sapiens GN=EXOSC9 PE=1 SV=3;>tr|D6R905|D6R905_HUMAN Exosome complex component RRP45 (Fragment) OS=Hom	ENSG00000123737	ENSP00000243498;ENSP00000368984;ENSP00000422205;ENSP00000425782	D6R905_HUMAN;D6RIY6_HUMAN;EXOS9_HUMAN	Not Sig	logFC < 2.0	UNCERTAIN
530	22.5444	22.3269	22.2738	22.3745	22.0468	22.6328	22.266	22.5272	NA	NA	NA	NA	NA	720	0.0277305	0.984381	-0.011683	-0.00544816	D6RJ07;Q9UL40;B7Z6B6;B7Z6Q2;B7Z4J8	D6RJ07;Q9UL40	Zinc finger protein 346	ZNF346	>tr|D6RJ07|D6RJ07_HUMAN Zinc finger protein 346 OS=Homo sapiens GN=ZNF346 PE=1 SV=1;>sp|Q9UL40|ZN346_HUMAN Zinc finger protein 346 OS=Homo sapiens GN=ZNF346 PE=1 SV=1	ENSG00000113761	ENSP00000261948;ENSP00000350869;ENSP00000424495;ENSP00000425725	D6RJ07_HUMAN;ZN346_HUMAN	Not Sig	logFC < 2.0	UNCERTAIN
531	22.1372	22.0522	20.7483	22.2806	20.1038	19.9062	21.0006	22.1865	NA	NA	NA	NA	NA	721	0.79158	0.109974	-1.00527	-0.382255	H0Y9N4;D6RJ90;Q9Y6G5;D6RC04	H0Y9N4;D6RJ90;Q9Y6G5;D6RC04	COMM domain-containing protein 10	COMMD10	>tr|H0Y9N4|H0Y9N4_HUMAN COMM domain-containing protein 10 (Fragment) OS=Homo sapiens GN=COMMD10 PE=1 SV=1;>tr|D6RJ90|D6RJ90_HUMAN COMM domain containing 10, isoform CRA_b OS=Homo sapiens GN=COMMD10 PE=1 SV=1;>sp|Q9Y6G5|COMDA_HUMAN COMM domain-containing pr	ENSG00000145781	ENSP00000274458;ENSP00000422448;ENSP00000424611;ENSP00000427319	COMDA_HUMAN;D6RC04_HUMAN;D6RJ90_HUMAN;H0Y9N4_HUMAN	Not Sig	logFC < 2.0	UNCERTAIN
532	20.6923	22.089	21.245	20.8765	21.7985	20.5889	22.3087	21.0352	NA	NA	NA	NA	NA	722	0.161524	0.623312	0.20709	0.0830493	D6RJC2;P30307	D6RJC2;P30307	M-phase inducer phosphatase 3	CDC25C	>tr|D6RJC2|D6RJC2_HUMAN M-phase inducer phosphatase 3 (Fragment) OS=Homo sapiens GN=CDC25C PE=1 SV=1;>sp|P30307|MPIP3_HUMAN M-phase inducer phosphatase 3 OS=Homo sapiens GN=CDC25C PE=1 SV=2	ENSG00000158402	ENSP00000321656;ENSP00000345205;ENSP00000348898;ENSP00000349821;ENSP00000392631;ENSP00000424795;ENSP00000425470;ENSP00000427251	D6RJC2_HUMAN;MPIP3_HUMAN	Not Sig	logFC < 2.0	UNCERTAIN
533	23.8567	23.66	23.4909	23.8071	23.4811	24.1093	23.5537	24.0341	NA	NA	NA	NA	NA	731	0.198007	0.80122	0.0908809	0.0416655	E5RFF9;Q9BRT9;E5RH56	E5RFF9;Q9BRT9	DNA replication complex GINS protein SLD5;DNA replication complex GINS protein SLD5, N-terminally processed	GINS4	>tr|E5RFF9|E5RFF9_HUMAN DNA replication complex GINS protein SLD5 OS=Homo sapiens GN=GINS4 PE=1 SV=1;>sp|Q9BRT9|SLD5_HUMAN DNA replication complex GINS protein SLD5 OS=Homo sapiens GN=GINS4 PE=1 SV=1	ENSG00000147536	ENSP00000276533;ENSP00000428754;ENSP00000428901;ENSP00000429581	E5RFF9_HUMAN;SLD5_HUMAN	Not Sig	logFC < 2.0	UNCERTAIN
534	23.1676	22.3735	22.092	20.6633	22.5184	22.484	22.6987	22.9944	NA	NA	NA	NA	NA	732	0.515039	0.2569	0.599721	0.236541	E5RFM2;E5RK82;E5RJF8;O15182;H0YBL5;E5RH67	E5RFM2;E5RK82;E5RJF8;O15182;H0YBL5;E5RH67	Centrin-3	CETN3	>tr|E5RFM2|E5RFM2_HUMAN Centrin-3 OS=Homo sapiens GN=CETN3 PE=1 SV=1;>tr|E5RK82|E5RK82_HUMAN Centrin-3 OS=Homo sapiens GN=CETN3 PE=1 SV=1;>tr|E5RJF8|E5RJF8_HUMAN Centrin-3 OS=Homo sapiens GN=CETN3 PE=1 SV=1;>sp|O15182|CETN3_HUMAN Centrin-3 OS=Homo sapiens	ENSG00000153140	ENSP00000283122;ENSP00000428259;ENSP00000429772;ENSP00000429875;ENSP00000430361;ENSP00000430409	CETN3_HUMAN;E5RFM2_HUMAN;E5RH67_HUMAN;E5RJF8_HUMAN;E5RK82_HUMAN;H0YBL5_HUMAN	Not Sig	logFC < 2.0	UNCERTAIN
535	23.5215	23.6835	23.7903	23.4717	24.1099	23.1503	23.2768	23.04	NA	NA	NA	NA	NA	734	0.381761	0.565669	-0.222472	-0.098691	E5RFU2;P34913;E5RFH6;H0YAW7;E5RI53	E5RFU2;P34913;E5RFH6	Bifunctional epoxide hydrolase 2;Cytosolic epoxide hydrolase 2;Lipid-phosphate phosphatase	EPHX2	>tr|E5RFU2|E5RFU2_HUMAN Bifunctional epoxide hydrolase 2 OS=Homo sapiens GN=EPHX2 PE=1 SV=1;>sp|P34913|HYES_HUMAN Bifunctional epoxide hydrolase 2 OS=Homo sapiens GN=EPHX2 PE=1 SV=2;>tr|E5RFH6|E5RFH6_HUMAN Bifunctional epoxide hydrolase 2 OS=Homo sapiens G	ENSG00000120915	ENSP00000369843;ENSP00000427956;ENSP00000428875;ENSP00000430269;ENSP00000430302	E5RFH6_HUMAN;E5RFU2_HUMAN;HYES_HUMAN	Not Sig	logFC < 2.0	UNCERTAIN
536	23.5917	23.3707	23.2624	23.1613	23.8002	23.549	21.7765	23.6826	NA	NA	NA	NA	NA	736	0.109756	0.725295	-0.144434	-0.058081	G5EA19;U3KQS5;E5RG17;Q6P1N9;H0YBX2;E5RID7;E5RK70;E5RGF2;A0A0D9SGD3;E5RH86;E5RI69;E5RJY6;E5RG62	G5EA19;U3KQS5;E5RG17;Q6P1N9;H0YBX2	Putative deoxyribonuclease TATDN1	TATDN1	>tr|G5EA19|G5EA19_HUMAN Putative deoxyribonuclease TATDN1 OS=Homo sapiens GN=TATDN1 PE=1 SV=1;>tr|U3KQS5|U3KQS5_HUMAN Putative deoxyribonuclease TATDN1 OS=Homo sapiens GN=TATDN1 PE=1 SV=1;>tr|E5RG17|E5RG17_HUMAN Putative deoxyribonuclease TATDN1 (Fragment)	ENSG00000147687	ENSP00000276692;ENSP00000428336;ENSP00000428609;ENSP00000430274;ENSP00000430481	E5RG17_HUMAN;G5EA19_HUMAN;H0YBX2_HUMAN;TATD1_HUMAN	Not Sig	logFC < 2.0	UNCERTAIN
537	25.352	24.5025	24.5466	25.0111	24.903	25.2065	24.9633	25.9571	NA	NA	NA	NA	NA	738	0.606782	0.367497	0.404438	0.174659	E5RGN3;E5RIM7;O00244	E5RGN3;E5RIM7;O00244	Copper transport protein ATOX1	ATOX1	>tr|E5RGN3|E5RGN3_HUMAN Copper transport protein ATOX1 OS=Homo sapiens GN=ATOX1 PE=1 SV=1;>tr|E5RIM7|E5RIM7_HUMAN Copper transport protein ATOX1 OS=Homo sapiens GN=ATOX1 PE=1 SV=1;>sp|O00244|ATOX1_HUMAN Copper transport protein ATOX1 OS=Homo sapiens GN=ATO	ENSG00000177556	ENSP00000316854;ENSP00000429366;ENSP00000429814;ENSP00000429982;ENSP00000430028;ENSP00000430598	ATOX1_HUMAN;E5RGN3_HUMAN;E5RIM7_HUMAN	Not Sig	logFC < 2.0	UNCERTAIN
538	27.0041	26.935	26.4016	26.9675	26.4535	26.8453	27.1886	27.2699	NA	NA	NA	NA	NA	740	0.187731	0.758436	0.112288	0.0502514	E5RIW3;E5RJD8;E5RHG6;O75347;E5RIX8	E5RIW3;E5RJD8;E5RHG6;O75347;E5RIX8	Tubulin-specific chaperone A	TBCA	>tr|E5RIW3|E5RIW3_HUMAN Tubulin-specific chaperone A OS=Homo sapiens GN=TBCA PE=1 SV=1;>tr|E5RJD8|E5RJD8_HUMAN Tubulin-specific chaperone A OS=Homo sapiens GN=TBCA PE=1 SV=1;>tr|E5RHG6|E5RHG6_HUMAN Tubulin-specific chaperone A OS=Homo sapiens GN=TBCA PE=1	ENSG00000171530	ENSP00000369736;ENSP00000429083;ENSP00000429288;ENSP00000429313;ENSP00000429793	E5RHG6_HUMAN;E5RIW3_HUMAN;E5RIX8_HUMAN;E5RJD8_HUMAN;TBCA_HUMAN	Not Sig	logFC < 2.0	UNCERTAIN
539	26.6245	26.0802	26.5865	26.4952	26.3266	26.8447	26.6239	27.0054	NA	NA	NA	NA	NA	741	0.625195	0.509643	0.253573	0.115625	E5RHG8;Q15369;R4GMY8	E5RHG8;Q15369;R4GMY8	Transcription elongation factor B polypeptide 1	TCEB1	>tr|E5RHG8|E5RHG8_HUMAN Transcription elongation factor B polypeptide 1 (Fragment) OS=Homo sapiens GN=TCEB1 PE=1 SV=1;>sp|Q15369|ELOC_HUMAN Transcription elongation factor B polypeptide 1 OS=Homo sapiens GN=TCEB1 PE=1 SV=1;>tr|R4GMY8|R4GMY8_HUMAN Transcrip	ENSG00000154582	ENSP00000284811;ENSP00000428074;ENSP00000428171;ENSP00000428334;ENSP00000429596;ENSP00000429789;ENSP00000429906;ENSP00000430224	E5RHG8_HUMAN;ELOC_HUMAN	Not Sig	logFC < 2.0	UNCERTAIN
540	26.1235	26.117	26.1151	26.3647	25.1303	25.2246	25.2984	25.3136	NA	NA	NA	NA	NA	745	4.81499	0.0625578	-0.938352	-0.452331	E5RHW4;O94905;E5RJ09	E5RHW4;O94905	Erlin-2	ERLIN2	>tr|E5RHW4|E5RHW4_HUMAN Erlin-2 (Fragment) OS=Homo sapiens GN=ERLIN2 PE=1 SV=1;>sp|O94905|ERLN2_HUMAN Erlin-2 OS=Homo sapiens GN=ERLIN2 PE=1 SV=1	ENSG00000147475	ENSP00000276461;ENSP00000335220;ENSP00000380405;ENSP00000427847;ENSP00000428112;ENSP00000429621;ENSP00000429903	E5RHW4_HUMAN;ERLN2_HUMAN	Not Sig	logFC < 2.0	UNCERTAIN
541	27.7851	27.9172	27.6843	27.8753	27.2176	27.9521	28.0103	28.3217	NA	NA	NA	NA	NA	747	0.0911992	0.870849	0.0599713	0.0267795	E5RI99;P62888;A0A0B4J213;E5RJH3;A0A0C4DH44	E5RI99;P62888	60S ribosomal protein L30	RPL30	>tr|E5RI99|E5RI99_HUMAN 60S ribosomal protein L30 (Fragment) OS=Homo sapiens GN=RPL30 PE=1 SV=1;>sp|P62888|RL30_HUMAN 60S ribosomal protein L30 OS=Homo sapiens GN=RPL30 PE=1 SV=2	ENSG00000156482	ENSP00000287038;ENSP00000428085;ENSP00000429483	E5RI99_HUMAN;RL30_HUMAN	Not Sig	logFC < 2.0	UNCERTAIN
542	22.911	21.3534	22.5216	22.8051	21.1124	22.8121	23.0691	23.1829	NA	NA	NA	NA	NA	751	0.0883759	0.732861	0.146326	0.0562486	E5RJ86;Q9NVT9;E9PR92;E5RHK3	E5RJ86;Q9NVT9;E9PR92;E5RHK3	Armadillo repeat-containing protein 1	ARMC1	>tr|E5RJ86|E5RJ86_HUMAN Armadillo repeat-containing protein 1 (Fragment) OS=Homo sapiens GN=ARMC1 PE=1 SV=1;>sp|Q9NVT9|ARMC1_HUMAN Armadillo repeat-containing protein 1 OS=Homo sapiens GN=ARMC1 PE=1 SV=1;>tr|E9PR92|E9PR92_HUMAN Armadillo repeat-containing	ENSG00000104442	ENSP00000276569;ENSP00000429191;ENSP00000429715;ENSP00000434297	ARMC1_HUMAN;E5RHK3_HUMAN;E5RJ86_HUMAN;E9PR92_HUMAN	Not Sig	logFC < 2.0	UNCERTAIN
543	25.6178	25.6189	25.7359	25.8469	25.6928	25.6361	25.7239	25.3982	NA	NA	NA	NA	NA	755	0.449829	0.789114	-0.0921493	-0.0440494	E7EM64;Q7L5N1;H7C3T0	E7EM64;Q7L5N1	COP9 signalosome complex subunit 6	COPS6	>tr|E7EM64|E7EM64_HUMAN COP9 signalosome complex subunit 6 OS=Homo sapiens GN=COPS6 PE=1 SV=1;>sp|Q7L5N1|CSN6_HUMAN COP9 signalosome complex subunit 6 OS=Homo sapiens GN=COPS6 PE=1 SV=1	ENSG00000168090	ENSP00000304102;ENSP00000400617	CSN6_HUMAN;E7EM64_HUMAN	Not Sig	logFC < 2.0	UNCERTAIN
544	24.1055	23.628	23.7051	24.1566	23.799	23.639	23.7116	23.5331	NA	NA	NA	NA	NA	757	0.767588	0.538654	-0.228149	-0.106281	E7EMB1;Q9UH65;E9PJK8;E9PJM7	E7EMB1;Q9UH65	Switch-associated protein 70	SWAP70	>tr|E7EMB1|E7EMB1_HUMAN Switch-associated protein 70 OS=Homo sapiens GN=SWAP70 PE=1 SV=1;>sp|Q9UH65|SWP70_HUMAN Switch-associated protein 70 OS=Homo sapiens GN=SWAP70 PE=1 SV=1	ENSG00000133789	ENSP00000315630;ENSP00000399056	E7EMB1_HUMAN;SWP70_HUMAN	Not Sig	logFC < 2.0	UNCERTAIN
545	23.4367	23.6212	24.0669	23.1691	23.9474	23.4855	23.3969	23.2716	NA	NA	NA	NA	NA	758	0.0719219	0.898448	-0.0481372	-0.0214941	J3QLD9;E7EMK3;Q14254;K7EKW9	J3QLD9;E7EMK3;Q14254	Flotillin-2	FLOT2	>tr|J3QLD9|J3QLD9_HUMAN Flotillin-2 OS=Homo sapiens GN=FLOT2 PE=1 SV=1;>tr|E7EMK3|E7EMK3_HUMAN Flotillin-2 OS=Homo sapiens GN=FLOT2 PE=1 SV=1;>sp|Q14254|FLOT2_HUMAN Flotillin-2 OS=Homo sapiens GN=FLOT2 PE=1 SV=2	ENSG00000132589	ENSP00000378366;ENSP00000378368;ENSP00000463503	E7EMK3_HUMAN;FLOT2_HUMAN;J3QLD9_HUMAN	Not Sig	logFC < 2.0	UNCERTAIN
546	24.3746	24.0639	24.0892	24.6066	24.8302	24.7855	24.7784	24.7095	NA	NA	NA	NA	NA	759	2.02483	0.265465	0.492308	0.231014	E7EMM4;Q13510	E7EMM4;Q13510	Acid ceramidase;Acid ceramidase subunit alpha;Acid ceramidase subunit beta	ASAH1	>tr|E7EMM4|E7EMM4_HUMAN Acid ceramidase OS=Homo sapiens GN=ASAH1 PE=1 SV=1;>sp|Q13510|ASAH1_HUMAN Acid ceramidase OS=Homo sapiens GN=ASAH1 PE=1 SV=5	ENSG00000104763	ENSP00000262097;ENSP00000326970;ENSP00000371152;ENSP00000427751	ASAH1_HUMAN;E7EMM4_HUMAN	Not Sig	logFC < 2.0	UNCERTAIN
547	23.455	24.4437	23.5971	23.7301	22.6616	23.6541	23.5216	23.7562	NA	NA	NA	NA	NA	760	0.574597	0.366261	-0.408088	-0.174919	E7EMN6;P41236;E7EUI7;Q6NXS1	E7EMN6;P41236;E7EUI7;Q6NXS1	Protein phosphatase inhibitor 2;Protein phosphatase inhibitor 2-like protein 3	PPP1R2;PPP1R2P3	>tr|E7EMN6|E7EMN6_HUMAN Protein phosphatase inhibitor 2 (Fragment) OS=Homo sapiens GN=PPP1R2 PE=1 SV=1;>sp|P41236|IPP2_HUMAN Protein phosphatase inhibitor 2 OS=Homo sapiens GN=PPP1R2 PE=1 SV=2;>tr|E7EUI7|E7EUI7_HUMAN Protein phosphatase inhibitor 2 OS=Homo	ENSG00000184203	ENSP00000328178;ENSP00000400238;ENSP00000406725	E7EMN6_HUMAN;E7EUI7_HUMAN;IPP2_HUMAN;IPP2M_HUMAN	Not Sig	logFC < 2.0	UNCERTAIN
548	22.4928	22.4662	22.5279	22.6379	22.0107	21.1265	21.9284	21.928	NA	NA	NA	NA	NA	761	1.99592	0.12846	-0.782814	-0.353958	E7EMP6;Q96FZ2;D6RAZ3;D6RAI0;D6RGK7;D6R9T3	E7EMP6;Q96FZ2;D6RAZ3;D6RAI0;D6RGK7;D6R9T3	Embryonic stem cell-specific 5-hydroxymethylcytosine-binding protein	HMCES	>tr|E7EMP6|E7EMP6_HUMAN Embryonic stem cell-specific 5-hydroxymethylcytosine-binding protein OS=Homo sapiens GN=HMCES PE=1 SV=1;>sp|Q96FZ2|HMCES_HUMAN Embryonic stem cell-specific 5-hydroxymethylcytosine-binding protein OS=Homo sapiens GN=HMCES PE=1 SV=1;>	ENSG00000183624	ENSP00000372955;ENSP00000374385;ENSP00000392966;ENSP00000421895;ENSP00000423132;ENSP00000424594;ENSP00000426215;ENSP00000426276	CC037_HUMAN;D6R9T3_HUMAN;D6RAI0_HUMAN;D6RAZ3_HUMAN;D6RGK7_HUMAN;E7EMP6_HUMAN	Not Sig	logFC < 2.0	UNCERTAIN
549	23.3957	23.5751	24.0212	23.2862	24.3446	23.7613	23.7963	23.3776	NA	NA	NA	NA	NA	762	0.435711	0.520656	0.250384	0.110961	E7EMW7;O95071;E7ET84;E5RFK7;H0YBB4	E7EMW7;O95071;E7ET84	E3 ubiquitin-protein ligase UBR5	UBR5	>tr|E7EMW7|E7EMW7_HUMAN E3 ubiquitin-protein ligase UBR5 OS=Homo sapiens GN=UBR5 PE=1 SV=1;>sp|O95071|UBR5_HUMAN E3 ubiquitin-protein ligase UBR5 OS=Homo sapiens GN=UBR5 PE=1 SV=2;>tr|E7ET84|E7ET84_HUMAN E3 ubiquitin-protein ligase UBR5 OS=Homo sapiens GN=	ENSG00000104517	ENSP00000427819;ENSP00000428693;ENSP00000429084	E7EMW7_HUMAN;E7ET84_HUMAN;UBR5_HUMAN	Not Sig	logFC < 2.0	UNCERTAIN
550	23.8307	23.9582	24.1158	23.7608	23.9578	24.0455	24.0689	23.7632	NA	NA	NA	NA	NA	764	0.156005	0.907726	0.0424986	0.0201946	E7EN20;Q9UPN9;H0Y612	E7EN20;Q9UPN9;H0Y612	E3 ubiquitin-protein ligase TRIM33	TRIM33	>tr|E7EN20|E7EN20_HUMAN E3 ubiquitin-protein ligase TRIM33 OS=Homo sapiens GN=TRIM33 PE=1 SV=2;>sp|Q9UPN9|TRI33_HUMAN E3 ubiquitin-protein ligase TRIM33 OS=Homo sapiens GN=TRIM33 PE=1 SV=3;>tr|H0Y612|H0Y612_HUMAN E3 ubiquitin-protein ligase TRIM33 (Fragmen	ENSG00000197323	ENSP00000351250;ENSP00000358556;ENSP00000402333;ENSP00000412077	E7EN20_HUMAN;H0Y612_HUMAN;TRI33_HUMAN	Not Sig	logFC < 2.0	UNCERTAIN
551	22.552	22.6287	22.554	22.5749	23.4842	22.7979	22.2597	22.7502	NA	NA	NA	NA	NA	766	0.434187	0.529867	0.245628	0.109054	E7ET59;E7EUX4;E7ENF2;P49441;C9J128;C9J2Z6;C9J173;B8ZZF6	E7ET59;E7EUX4;E7ENF2;P49441;C9J128;C9J2Z6;C9J173;B8ZZF6	Inositol polyphosphate 1-phosphatase	INPP1	>tr|E7ET59|E7ET59_HUMAN Inositol polyphosphate 1-phosphatase (Fragment) OS=Homo sapiens GN=INPP1 PE=1 SV=1;>tr|E7EUX4|E7EUX4_HUMAN Inositol polyphosphate 1-phosphatase (Fragment) OS=Homo sapiens GN=INPP1 PE=1 SV=1;>tr|E7ENF2|E7ENF2_HUMAN Inositol polyphosp	ENSG00000151689	ENSP00000325423;ENSP00000376142;ENSP00000387079;ENSP00000391415;ENSP00000392814;ENSP00000395424;ENSP00000404732;ENSP00000409786;ENSP00000412119;ENSP00000440650	B8ZZF6_HUMAN;C9J128_HUMAN;C9J173_HUMAN;C9J2Z6_HUMAN;E7ENF2_HUMAN;E7ET59_HUMAN;E7EUX4_HUMAN;INPP_HUMAN	Not Sig	logFC < 2.0	UNCERTAIN
552	21.6549	21.9889	22.0313	21.6268	22.3823	22.096	21.1527	21.4609	NA	NA	NA	NA	NA	767	0.0615733	0.892597	-0.0524788	-0.0227958	E7ENV7;Q86YQ8;Q8IYJ1;Q9HCH3;A0A0J9YWU8;A0A0J9YWA1;A0A087WX62	E7ENV7;Q86YQ8;Q8IYJ1;Q9HCH3	Copine-8;Copine-9;Copine-5	CPNE8;CPNE9;CPNE5	>tr|E7ENV7|E7ENV7_HUMAN Copine-8 OS=Homo sapiens GN=CPNE8 PE=1 SV=2;>sp|Q86YQ8|CPNE8_HUMAN Copine-8 OS=Homo sapiens GN=CPNE8 PE=1 SV=2;>sp|Q8IYJ1|CPNE9_HUMAN Copine-9 OS=Homo sapiens GN=CPNE9 PE=1 SV=3;>sp|Q9HCH3|CPNE5_HUMAN Copine-5 OS=Homo sapiens GN=CPN	ENSG00000124772;ENSG00000139117;ENSG00000144550	ENSP00000244751;ENSP00000329748;ENSP00000353633;ENSP00000373342;ENSP00000373343	CPNE5_HUMAN;CPNE8_HUMAN;CPNE9_HUMAN;E7ENV7_HUMAN	Not Sig	logFC < 2.0	UNCERTAIN
553	25.4489	25.4624	25.4879	25.4553	26.0079	25.7565	25.8061	25.7767	NA	NA	NA	NA	NA	768	3.15355	0.355034	0.373147	0.181266	E7EV99;E7ENY0;P35611;A0A0A0MSR2;H0Y9H2;D6RF25;D6RAH3;D6RJE2;H0YFD8;H0YG19	E7EV99;E7ENY0;P35611;A0A0A0MSR2;H0Y9H2	Alpha-adducin	ADD1	>tr|E7EV99|E7EV99_HUMAN Alpha-adducin OS=Homo sapiens GN=ADD1 PE=1 SV=1;>tr|E7ENY0|E7ENY0_HUMAN Alpha-adducin OS=Homo sapiens GN=ADD1 PE=1 SV=1;>sp|P35611|ADDA_HUMAN Alpha-adducin OS=Homo sapiens GN=ADD1 PE=1 SV=2;>tr|A0A0A0MSR2|A0A0A0MSR2_HUMAN Alpha-addu	ENSG00000087274	ENSP00000264758;ENSP00000381197;ENSP00000399828;ENSP00000421907;ENSP00000423024;ENSP00000424143	ADDA_HUMAN;E7ENY0_HUMAN;E7EV99_HUMAN;H0Y9H2_HUMAN	Not Sig	logFC < 2.0	UNCERTAIN
554	21.79	21.9603	21.8512	21.8819	22.4705	20.9941	21.2307	21.7744	NA	NA	NA	NA	NA	769	0.326586	0.530699	-0.253434	-0.108777	E7EP35;Q9Y546	E7EP35;Q9Y546	Leucine-rich repeat-containing protein 42	LRRC42	>tr|E7EP35|E7EP35_HUMAN Leucine-rich repeat-containing protein 42 (Fragment) OS=Homo sapiens GN=LRRC42 PE=1 SV=1;>sp|Q9Y546|LRC42_HUMAN Leucine-rich repeat-containing protein 42 OS=Homo sapiens GN=LRRC42 PE=1 SV=1	ENSG00000116212	ENSP00000318185;ENSP00000360421;ENSP00000389368	E7EP35_HUMAN;LRC42_HUMAN	Not Sig	logFC < 2.0	UNCERTAIN
555	27.9273	28.0651	27.7152	27.9912	27.6287	28.1209	28.125	28.2846	NA	NA	NA	NA	NA	770	0.299874	0.743802	0.115105	0.0532662	E7EPB3;P50914	E7EPB3;P50914	60S ribosomal protein L14	RPL14	>tr|E7EPB3|E7EPB3_HUMAN 60S ribosomal protein L14 OS=Homo sapiens GN=RPL14 PE=1 SV=1;>sp|P50914|RL14_HUMAN 60S ribosomal protein L14 OS=Homo sapiens GN=RPL14 PE=1 SV=4	ENSG00000188846	ENSP00000345156;ENSP00000379506;ENSP00000391446	E7EPB3_HUMAN;RL14_HUMAN	Not Sig	logFC < 2.0	UNCERTAIN
556	28.2842	28.1099	28.0639	28.2854	28.3204	28.6731	28.7537	28.7813	NA	NA	NA	NA	NA	771	1.98785	0.29984	0.446276	0.210394	E7ES33;E7EPK1;Q16181;G3V1Q4;A0A0U1RRE1;A0A0U1RRH9;A0A0U1RRM2;Q5JXL7;A0A0U1RQK0;A0A0U1RRD1;B1AHR1;Q9UH03;Q6ZU15	E7ES33;E7EPK1;Q16181;G3V1Q4	Septin-7	2016-09-07	>tr|E7ES33|E7ES33_HUMAN Septin-7 OS=Homo sapiens GN=SEPT7 PE=1 SV=3;>tr|E7EPK1|E7EPK1_HUMAN Septin-7 OS=Homo sapiens GN=SEPT7 PE=1 SV=2;>sp|Q16181|SEPT7_HUMAN Septin-7 OS=Homo sapiens GN=SEPT7 PE=1 SV=2;>tr|G3V1Q4|G3V1Q4_HUMAN Septin-7 OS=Homo sapiens GN=S	ENSG00000122545	ENSP00000344868;ENSP00000381992;ENSP00000381993;ENSP00000413507;ENSP00000443706	E7EPK1_HUMAN;E7ES33_HUMAN;G3V1Q4_HUMAN;SEPT7_HUMAN	Not Sig	logFC < 2.0	UNCERTAIN
557	26.5433	26.5664	26.702	26.6687	26.1649	26.5373	26.5148	26.5948	NA	NA	NA	NA	NA	772	0.790703	0.636745	-0.167176	-0.0794246	E7EPN9;Q9Y520;H7C5N8;A0A0A0MS30	E7EPN9;Q9Y520	Protein PRRC2C	PRRC2C	>tr|E7EPN9|E7EPN9_HUMAN Protein PRRC2C OS=Homo sapiens GN=PRRC2C PE=1 SV=1;>sp|Q9Y520|PRC2C_HUMAN Protein PRRC2C OS=Homo sapiens GN=PRRC2C PE=1 SV=4	ENSG00000117523	ENSP00000343629;ENSP00000356716;ENSP00000375928;ENSP00000410219	E7EPN9_HUMAN;PRC2C_HUMAN	Not Sig	logFC < 2.0	UNCERTAIN
558	22.4839	22.5721	22.8115	22.4032	22.7929	22.4356	22.6818	22.418	NA	NA	NA	NA	NA	773	0.0389631	0.979957	0.0143709	0.00675362	J3KN87;E7EPP6;O14757;E9PPA5;E9PJI4;E9PKQ3	J3KN87;E7EPP6;O14757	Serine/threonine-protein kinase Chk1	CHEK1	>tr|J3KN87|J3KN87_HUMAN Serine/threonine-protein kinase Chk1 OS=Homo sapiens GN=CHEK1 PE=1 SV=1;>tr|E7EPP6|E7EPP6_HUMAN Serine/threonine-protein kinase Chk1 OS=Homo sapiens GN=CHEK1 PE=1 SV=1;>sp|O14757|CHK1_HUMAN Serine/threonine-protein kinase Chk1 OS=Ho	ENSG00000149554	ENSP00000278916;ENSP00000388648;ENSP00000391090;ENSP00000412504;ENSP00000432890;ENSP00000435371;ENSP00000442317	CHK1_HUMAN;E7EPP6_HUMAN;J3KN87_HUMAN	Not Sig	logFC < 2.0	UNCERTAIN
559	24.63	24.15	23.6574	24.2845	24.0158	24.4528	24.0182	24.6562	NA	NA	NA	NA	NA	774	0.156656	0.777892	0.10524	0.0466136	E7EPT4;P19404	E7EPT4;P19404	NADH dehydrogenase [ubiquinone] flavoprotein 2, mitochondrial	NDUFV2	>tr|E7EPT4|E7EPT4_HUMAN NADH dehydrogenase [ubiquinone] flavoprotein 2, mitochondrial OS=Homo sapiens GN=NDUFV2 PE=1 SV=1;>sp|P19404|NDUV2_HUMAN NADH dehydrogenase [ubiquinone] flavoprotein 2, mitochondrial OS=Homo sapiens GN=NDUFV2 PE=1 SV=2	ENSG00000178127	ENSP00000327268;ENSP00000382908	E7EPT4_HUMAN;NDUV2_HUMAN	Not Sig	logFC < 2.0	UNCERTAIN
560	23.1869	23.389	23.037	23.1628	23.8388	24.0445	24.5749	24.3307	NA	NA	NA	NA	NA	775	2.88685	0.0581193	1.00326	0.460844	E7EPV7;P37840;D6RA31;H6UYS7;Q16143	E7EPV7;P37840;D6RA31;H6UYS7	Alpha-synuclein	SNCA	>tr|E7EPV7|E7EPV7_HUMAN Alpha-synuclein OS=Homo sapiens GN=SNCA PE=1 SV=1;>sp|P37840|SYUA_HUMAN Alpha-synuclein OS=Homo sapiens GN=SNCA PE=1 SV=1;>tr|D6RA31|D6RA31_HUMAN Alpha-synuclein (Fragment) OS=Homo sapiens GN=SNCA PE=1 SV=7;>tr|H6UYS7|H6UYS7_HUMAN A	ENSG00000145335	ENSP00000338345;ENSP00000343683;ENSP00000378437;ENSP00000378440;ENSP00000378442;ENSP00000396241;ENSP00000421485;ENSP00000422238;ENSP00000423445;ENSP00000426034;ENSP00000426955	D6RA31_HUMAN;E7EPV7_HUMAN;H6UYS7_HUMAN;SYUA_HUMAN	Not Sig	logFC < 2.0	UNCERTAIN
561	20.5738	21.6603	21.637	21.9047	21.0252	21.9724	21.2013	22.2044	NA	NA	NA	NA	NA	776	0.144386	0.695622	0.15687	0.0650103	I3L0K1;E7EQ34;O14653;I3L3V4;I3L4Z6;I3NI02;I3L1K7	I3L0K1;E7EQ34;O14653;I3L3V4;I3L4Z6	Golgi SNAP receptor complex member 2	GOSR2	>tr|I3L0K1|I3L0K1_HUMAN Golgi SNAP receptor complex member 2 (Fragment) OS=Homo sapiens GN=GOSR2 PE=4 SV=1;>tr|E7EQ34|E7EQ34_HUMAN Uncharacterized protein OS=Homo sapiens PE=4 SV=2;>sp|O14653|GOSR2_HUMAN Golgi SNAP receptor complex member 2 OS=Homo sapiens	ENSG00000108433;ENSG00000262633	ENSP00000225567;ENSP00000377101;ENSP00000390577;ENSP00000394559;ENSP00000458154;ENSP00000460760;ENSP00000461460;ENSP00000461673	E7EQ34_HUMAN;GOSR2_HUMAN;I3L0K1_HUMAN;I3L3V4_HUMAN;I3L4Z6_HUMAN	Not Sig	logFC < 2.0	UNCERTAIN
562	25.7144	25.4596	24.9867	25.7082	25.1725	25.5693	25.7943	25.8793	NA	NA	NA	NA	NA	777	0.237687	0.71	0.1366	0.0611827	E7EQ69;Q9GZZ1;C9J5D1;A0A087WWJ2;C9JZU6;F8WCK0;C9J5J3;A0A0D9SF32	E7EQ69;Q9GZZ1;C9J5D1;A0A087WWJ2	N-alpha-acetyltransferase 50	NAA50	>tr|E7EQ69|E7EQ69_HUMAN N-alpha-acetyltransferase 50 OS=Homo sapiens GN=NAA50 PE=1 SV=1;>sp|Q9GZZ1|NAA50_HUMAN N-alpha-acetyltransferase 50 OS=Homo sapiens GN=NAA50 PE=1 SV=1;>tr|C9J5D1|C9J5D1_HUMAN N-alpha-acetyltransferase 50 OS=Homo sapiens GN=NAA50 PE=	ENSG00000121579	ENSP00000240922;ENSP00000417110;ENSP00000417837	C9J5D1_HUMAN;E7EQ69_HUMAN;NAA50_HUMAN	Not Sig	logFC < 2.0	UNCERTAIN
563	23.1763	22.8247	23.6855	23.0547	24.442	23.478	23.4322	23.0922	NA	NA	NA	NA	NA	778	0.585037	0.354186	0.425828	0.181793	E7EQI7;Q12768;E5RFU6	E7EQI7;Q12768	WASH complex subunit strumpellin	KIAA0196	>tr|E7EQI7|E7EQI7_HUMAN WASH complex subunit strumpellin OS=Homo sapiens GN=KIAA0196 PE=1 SV=1;>sp|Q12768|STRUM_HUMAN WASH complex subunit strumpellin OS=Homo sapiens GN=KIAA0196 PE=1 SV=1	ENSG00000164961	ENSP00000318016;ENSP00000429676	E7EQI7_HUMAN;STRUM_HUMAN	Not Sig	logFC < 2.0	UNCERTAIN
564	27.4737	27.1556	27.1561	27.4691	27.6709	27.899	27.8083	28.0085	NA	NA	NA	NA	NA	779	2.43437	0.23361	0.533082	0.251953	E7EQR4;P15311;B1AKD8;Q5TZA2	E7EQR4;P15311	Ezrin	EZR	>tr|E7EQR4|E7EQR4_HUMAN Ezrin OS=Homo sapiens GN=EZR PE=1 SV=3;>sp|P15311|EZRI_HUMAN Ezrin OS=Homo sapiens GN=EZR PE=1 SV=4	ENSG00000092820	ENSP00000338934;ENSP00000356042;ENSP00000376016	E7EQR4_HUMAN;EZRI_HUMAN	Not Sig	logFC < 2.0	UNCERTAIN
565	26.8022	26.8585	26.8867	27.0031	27.1327	27.2429	27.2871	27.41	NA	NA	NA	NA	NA	780	2.75405	0.350693	0.38054	0.183724	E9PES6;E7ES08;E7EQU1;O15347	E9PES6;E7ES08;E7EQU1;O15347	High mobility group protein B3	HMGB3	>tr|E9PES6|E9PES6_HUMAN High mobility group protein B3 (Fragment) OS=Homo sapiens GN=HMGB3 PE=1 SV=1;>tr|E7ES08|E7ES08_HUMAN High mobility group protein B3 (Fragment) OS=Homo sapiens GN=HMGB3 PE=1 SV=1;>tr|E7EQU1|E7EQU1_HUMAN High mobility group protein B3	ENSG00000029993;ENSG00000269411	ENSP00000359393;ENSP00000405601;ENSP00000410354;ENSP00000417027;ENSP00000442758;ENSP00000472199;ENSP00000472961	E7EQU1_HUMAN;E7ES08_HUMAN;E9PES6_HUMAN;HMGB3_HUMAN	Not Sig	logFC < 2.0	UNCERTAIN
566	22.0656	22.073	21.5359	21.5298	21.3902	21.5335	21.5573	21.4441	NA	NA	NA	NA	NA	781	1.0359	0.418521	-0.319829	-0.14809	E7EQY4;E7EV10;Q9BTC8;E9PCS8;D6W5A2;H0YIT0;E9PF88	E7EQY4;E7EV10;Q9BTC8;E9PCS8;D6W5A2	Metastasis-associated protein MTA3	MTA3	>tr|E7EQY4|E7EQY4_HUMAN Metastasis-associated protein MTA3 OS=Homo sapiens GN=MTA3 PE=1 SV=1;>tr|E7EV10|E7EV10_HUMAN Metastasis-associated protein MTA3 OS=Homo sapiens GN=MTA3 PE=1 SV=1;>sp|Q9BTC8|MTA3_HUMAN Metastasis-associated protein MTA3 OS=Homo sapie	ENSG00000057935	ENSP00000383973;ENSP00000384249;ENSP00000385045;ENSP00000385241;ENSP00000385823;ENSP00000386763;ENSP00000391455	D6W5A2_HUMAN;E7EQY4_HUMAN;E7EV10_HUMAN;E9PCS8_HUMAN;MTA3_HUMAN	Not Sig	logFC < 2.0	UNCERTAIN
567	23.5776	23.79	23.5629	23.5466	23.9074	23.5476	23.3732	23.374	NA	NA	NA	NA	NA	783	0.196092	0.842974	-0.0687447	-0.0321503	E7ERI8;E7EW49;E3W994;A0A0U1RQI6;J3KR49;O75122;H7C5M8;C9J668;H7C4X8;D6RBU8;B3KR06;E7ENG2;H7C4I5	E7ERI8;E7EW49;E3W994;A0A0U1RQI6;J3KR49;O75122	CLIP-associating protein 2	CLASP2	>tr|E7ERI8|E7ERI8_HUMAN CLIP-associating protein 2 OS=Homo sapiens GN=CLASP2 PE=1 SV=1;>tr|E7EW49|E7EW49_HUMAN CLIP-associating protein 2 OS=Homo sapiens GN=CLASP2 PE=1 SV=1;>tr|E3W994|E3W994_HUMAN CLIP-associating protein 2 OS=Homo sapiens GN=CLASP2 PE=1	ENSG00000163539	ENSP00000324364;ENSP00000382297;ENSP00000417518;ENSP00000419305;ENSP00000419974	CLAP2_HUMAN;E3W994_HUMAN;E7ERI8_HUMAN;E7EW49_HUMAN;J3KR49_HUMAN	Not Sig	logFC < 2.0	UNCERTAIN
568	23.7215	23.9212	24.0945	23.9593	24.1939	23.942	24.0435	23.9431	NA	NA	NA	NA	NA	784	0.500494	0.754515	0.106496	0.050777	E7ERK9;Q9UI10;A0A087WW69;F8W8L6	E7ERK9;Q9UI10;A0A087WW69	Translation initiation factor eIF-2B subunit delta	EIF2B4	>tr|E7ERK9|E7ERK9_HUMAN Translation initiation factor eIF-2B subunit delta OS=Homo sapiens GN=EIF2B4 PE=1 SV=1;>sp|Q9UI10|EI2BD_HUMAN Translation initiation factor eIF-2B subunit delta OS=Homo sapiens GN=EIF2B4 PE=1 SV=2;>tr|A0A087WW69|A0A087WW69_HUMAN Tra	ENSG00000115211	ENSP00000233552;ENSP00000394397;ENSP00000394869;ENSP00000429323	E7ERK9_HUMAN;EI2BD_HUMAN	Not Sig	logFC < 2.0	UNCERTAIN
569	23.1171	23.4858	23.8763	23.1352	23.7292	23.5135	23.1664	22.9239	NA	NA	NA	NA	NA	785	0.102156	0.849522	-0.0703583	-0.0312266	E7ERS3;Q86VM9;H3BRN6;H3BRH3;H3BP01	E7ERS3;Q86VM9	Zinc finger CCCH domain-containing protein 18	ZC3H18	>tr|E7ERS3|E7ERS3_HUMAN Zinc finger CCCH domain-containing protein 18 OS=Homo sapiens GN=ZC3H18 PE=1 SV=1;>sp|Q86VM9|ZCH18_HUMAN Zinc finger CCCH domain-containing protein 18 OS=Homo sapiens GN=ZC3H18 PE=1 SV=2	ENSG00000158545	ENSP00000301011;ENSP00000416951	E7ERS3_HUMAN;ZCH18_HUMAN	Not Sig	logFC < 2.0	UNCERTAIN
570	24.5533	24.4904	24.5866	24.5023	24.8467	24.9286	24.7348	24.8569	NA	NA	NA	NA	NA	787	3.27843	0.413855	0.30858	0.150829	F8W7U3;E7ESD2;Q641Q2;A0A087WYF6;J3KP36;A0A0A0MR88;A0A096LPC5;Q9Y4E1;A0A0A0MT65;Q5SRD0;B1AP61	F8W7U3;E7ESD2;Q641Q2;A0A087WYF6;J3KP36;A0A0A0MR88;A0A096LPC5;Q9Y4E1	WASH complex subunit FAM21A;WASH complex subunit FAM21C	FAM21A;FAM21C	>tr|F8W7U3|F8W7U3_HUMAN WASH complex subunit FAM21A OS=Homo sapiens GN=FAM21A PE=1 SV=1;>tr|E7ESD2|E7ESD2_HUMAN WASH complex subunit FAM21A OS=Homo sapiens GN=FAM21A PE=1 SV=2;>sp|Q641Q2|FA21A_HUMAN WASH complex subunit FAM21A OS=Homo sapiens GN=FAM21A PE=	ENSG00000099290;ENSG00000172661;ENSG00000265551	ENSP00000282633;ENSP00000314417;ENSP00000337541;ENSP00000344037;ENSP00000352922;ENSP00000363482;ENSP00000382277;ENSP00000416630;ENSP00000439811;ENSP00000442128;ENSP00000461926;ENSP00000462756;ENSP00000462907;ENSP00000464471;ENSP00000464578	E7ESD2_HUMAN;F8W7U3_HUMAN;FA21A_HUMAN;FA21C_HUMAN;J3KP36_HUMAN	Not Sig	logFC < 2.0	UNCERTAIN
571	21.6904	21.682	21.6856	22.1353	20.9626	21.542	20.9883	21.9272	NA	NA	NA	NA	NA	788	0.862343	0.318643	-0.443284	-0.196267	E7ESL0;J3KQY1;Q9NWU5;A0A0C4DGX2	E7ESL0;J3KQY1;Q9NWU5;A0A0C4DGX2	39S ribosomal protein L22, mitochondrial	MRPL22	>tr|E7ESL0|E7ESL0_HUMAN 39S ribosomal protein L22, mitochondrial OS=Homo sapiens GN=MRPL22 PE=1 SV=1;>tr|J3KQY1|J3KQY1_HUMAN 39S ribosomal protein L22, mitochondrial OS=Homo sapiens GN=MRPL22 PE=1 SV=1;>sp|Q9NWU5|RM22_HUMAN 39S ribosomal protein L22, mitoc	ENSG00000082515	ENSP00000265229;ENSP00000411177;ENSP00000429039;ENSP00000431040	E7ESL0_HUMAN;J3KQY1_HUMAN;RM22_HUMAN	Not Sig	logFC < 2.0	UNCERTAIN
572	25.7676	25.6826	25.4348	25.6734	25.6765	25.4476	25.5299	25.6127	NA	NA	NA	NA	NA	790	0.362058	0.832973	-0.0729227	-0.03494	E7ESY4;Q13330;H0Y4T7;F8W9Y9	E7ESY4;Q13330;H0Y4T7	Metastasis-associated protein MTA1	MTA1	>tr|E7ESY4|E7ESY4_HUMAN Metastasis-associated protein MTA1 OS=Homo sapiens GN=MTA1 PE=1 SV=1;>sp|Q13330|MTA1_HUMAN Metastasis-associated protein MTA1 OS=Homo sapiens GN=MTA1 PE=1 SV=2;>tr|H0Y4T7|H0Y4T7_HUMAN Metastasis-associated protein MTA1 (Fragment) OS	ENSG00000182979	ENSP00000333633;ENSP00000384180;ENSP00000385702;ENSP00000393438;ENSP00000394106	E7ESY4_HUMAN;H0Y4T7_HUMAN;MTA1_HUMAN	Not Sig	logFC < 2.0	UNCERTAIN
573	21.5212	21.0723	21.2778	21.4785	22.035	21.3205	21.6166	20.6813	NA	NA	NA	NA	NA	791	0.0913013	0.840399	0.0759044	0.0329625	E7ET49;Q8NCG7	E7ET49;Q8NCG7	Sn1-specific diacylglycerol lipase beta	DAGLB	>tr|E7ET49|E7ET49_HUMAN Sn1-specific diacylglycerol lipase beta OS=Homo sapiens GN=DAGLB PE=1 SV=1;>sp|Q8NCG7|DGLB_HUMAN Sn1-specific diacylglycerol lipase beta OS=Homo sapiens GN=DAGLB PE=1 SV=2	ENSG00000164535	ENSP00000297056;ENSP00000391171;ENSP00000404785	DGLB_HUMAN;E7ET49_HUMAN	Not Sig	logFC < 2.0	UNCERTAIN
574	23.651	23.5812	24.0888	23.6036	24.3559	23.7119	23.4842	23.5479	NA	NA	NA	NA	NA	793	0.0670625	0.911217	0.0438247	0.0196273	E7ETA6;Q15154;A6NNN6;H0YBA1;E5RGQ4;E9PGW9;E7EV93	E7ETA6;Q15154;A6NNN6	Pericentriolar material 1 protein	PCM1	>tr|E7ETA6|E7ETA6_HUMAN Pericentriolar material 1 protein OS=Homo sapiens GN=PCM1 PE=1 SV=1;>sp|Q15154|PCM1_HUMAN Pericentriolar material 1 protein OS=Homo sapiens GN=PCM1 PE=1 SV=4;>tr|A6NNN6|A6NNN6_HUMAN Pericentriolar material 1 protein OS=Homo sapiens	ENSG00000078674	ENSP00000327077;ENSP00000328332;ENSP00000431099	A6NNN6_HUMAN;E7ETA6_HUMAN;PCM1_HUMAN	Not Sig	logFC < 2.0	UNCERTAIN
575	23.493	23.041	22.7793	23.1361	23.2631	22.8839	23.1084	22.8234	NA	NA	NA	NA	NA	794	0.204952	0.796763	-0.0926323	-0.0425065	E7ETB3;Q9ULA0;E7EMB6;C9JBE1;E5RJ35;E7EPX3;B9ZVU2;F8WAN0	E7ETB3;Q9ULA0;E7EMB6	Aspartyl aminopeptidase	DNPEP	>tr|E7ETB3|E7ETB3_HUMAN Aspartyl aminopeptidase OS=Homo sapiens GN=DNPEP PE=1 SV=2;>sp|Q9ULA0|DNPEP_HUMAN Aspartyl aminopeptidase OS=Homo sapiens GN=DNPEP PE=1 SV=1;>tr|E7EMB6|E7EMB6_HUMAN Aspartyl aminopeptidase OS=Homo sapiens GN=DNPEP PE=1 SV=2	ENSG00000123992	ENSP00000273075;ENSP00000363083;ENSP00000431076	DNPEP_HUMAN;E7EMB6_HUMAN;E7ETB3_HUMAN	Not Sig	logFC < 2.0	UNCERTAIN
576	22.8406	23.071	23.4074	23.226	23.0404	22.7811	23.07	22.406	NA	NA	NA	NA	NA	795	0.792835	0.430351	-0.311924	-0.142095	E7ETD6;Q12830;J3QQQ8;J3KSK9;E9PE19;Q9NSV4	E7ETD6;Q12830	Nucleosome-remodeling factor subunit BPTF	BPTF	>tr|E7ETD6|E7ETD6_HUMAN Nucleosome-remodeling factor subunit BPTF (Fragment) OS=Homo sapiens GN=BPTF PE=1 SV=3;>sp|Q12830|BPTF_HUMAN Nucleosome-remodeling factor subunit BPTF OS=Homo sapiens GN=BPTF PE=1 SV=3	ENSG00000171634;ENSG00000262858	ENSP00000307208;ENSP00000315454;ENSP00000334351;ENSP00000388405;ENSP00000461014	BPTF_HUMAN;E7ETD6_HUMAN	Not Sig	logFC < 2.0	UNCERTAIN
577	24.0095	24.1662	23.7331	23.8788	24.1179	24.4236	24.4542	24.5117	NA	NA	NA	NA	NA	796	1.82068	0.308779	0.429966	0.202078	E7ETU5;F6Y5H0;P29558;E7EPF2	E7ETU5;F6Y5H0;P29558	RNA-binding motif, single-stranded-interacting protein 1	RBMS1	>tr|E7ETU5|E7ETU5_HUMAN RNA-binding motif, single-stranded-interacting protein 1 OS=Homo sapiens GN=RBMS1 PE=1 SV=1;>tr|F6Y5H0|F6Y5H0_HUMAN RNA-binding motif, single-stranded-interacting protein 1 OS=Homo sapiens GN=RBMS1 PE=1 SV=1;>sp|P29558|RBMS1_HUMAN R	ENSG00000153250	ENSP00000294904;ENSP00000386347;ENSP00000386571;ENSP00000387280	E7ETU5_HUMAN;RBMS1_HUMAN	Not Sig	logFC < 2.0	UNCERTAIN
578	23.6153	23.6675	23.464	23.8576	23.6621	23.6078	24.0662	23.9759	NA	NA	NA	NA	NA	797	0.598671	0.624904	0.176911	0.0826849	E9PF06;H0Y9G6;E7ETU7;P09001;D6RC14	E9PF06;H0Y9G6;E7ETU7;P09001;D6RC14	39S ribosomal protein L3, mitochondrial	MRPL3	>tr|E9PF06|E9PF06_HUMAN 39S ribosomal protein L3, mitochondrial (Fragment) OS=Homo sapiens GN=MRPL3 PE=1 SV=1;>tr|H0Y9G6|H0Y9G6_HUMAN 39S ribosomal protein L3, mitochondrial (Fragment) OS=Homo sapiens GN=MRPL3 PE=1 SV=1;>tr|E7ETU7|E7ETU7_HUMAN 39S ribosoma	ENSG00000114686	ENSP00000264995;ENSP00000398536;ENSP00000422035;ENSP00000422419;ENSP00000424107	D6RC14_HUMAN;E7ETU7_HUMAN;E9PF06_HUMAN;H0Y9G6_HUMAN;RM03_HUMAN	Not Sig	logFC < 2.0	UNCERTAIN
579	22.0097	22.2787	21.8885	22.4972	21.2187	21.7052	21.659	21.6759	NA	NA	NA	NA	NA	798	1.82461	0.207816	-0.60383	-0.277115	E7ETU9;O00469	E7ETU9;O00469	Procollagen-lysine,2-oxoglutarate 5-dioxygenase 2	PLOD2	>tr|E7ETU9|E7ETU9_HUMAN Procollagen-lysine,2-oxoglutarate 5-dioxygenase 2 OS=Homo sapiens GN=PLOD2 PE=1 SV=1;>sp|O00469|PLOD2_HUMAN Procollagen-lysine,2-oxoglutarate 5-dioxygenase 2 OS=Homo sapiens GN=PLOD2 PE=1 SV=2	ENSG00000152952	ENSP00000282903;ENSP00000353170;ENSP00000420094	E7ETU9_HUMAN;PLOD2_HUMAN	Not Sig	logFC < 2.0	UNCERTAIN
580	24.4205	24.6285	24.6514	23.8232	24.4396	24.1519	24.498	24.0479	NA	NA	NA	NA	NA	801	0.168433	0.791755	-0.0965624	-0.0434613	E7ETY7;Q8TED1;J3KNB5	E7ETY7;Q8TED1	Glutathione peroxidase;Probable glutathione peroxidase 8	GPX8	>tr|E7ETY7|E7ETY7_HUMAN Glutathione peroxidase OS=Homo sapiens GN=GPX8 PE=1 SV=1;>sp|Q8TED1|GPX8_HUMAN Probable glutathione peroxidase 8 OS=Homo sapiens GN=GPX8 PE=1 SV=2	ENSG00000164294	ENSP00000423822;ENSP00000427466	E7ETY7_HUMAN;GPX8_HUMAN	Not Sig	logFC < 2.0	UNCERTAIN
581	25.6915	25.8176	25.9889	25.4674	26.8528	26.3772	26.3552	26.2633	NA	NA	NA	NA	NA	802	2.23921	0.154568	0.720738	0.331814	E7ETZ4;Q9Y6E2;Q75MG1;B5MCH7;E7EMS9;B5MCE7;E9PFE3;C9JF98;F8WDX8	E7ETZ4;Q9Y6E2;Q75MG1;B5MCH7;E7EMS9;B5MCE7	Basic leucine zipper and W2 domain-containing protein 2	BZW2	>tr|E7ETZ4|E7ETZ4_HUMAN Basic leucine zipper and W2 domain-containing protein 2 (Fragment) OS=Homo sapiens GN=BZW2 PE=1 SV=1;>sp|Q9Y6E2|BZW2_HUMAN Basic leucine zipper and W2 domain-containing protein 2 OS=Homo sapiens GN=BZW2 PE=1 SV=1;>tr|Q75MG1|Q75MG1_H	ENSG00000136261	ENSP00000258761;ENSP00000384617;ENSP00000385577;ENSP00000397249;ENSP00000403481;ENSP00000412750;ENSP00000415924	B5MCE7_HUMAN;B5MCH7_HUMAN;BZW2_HUMAN;E7EMS9_HUMAN;E7ETZ4_HUMAN;Q75MG1_HUMAN	Not Sig	logFC < 2.0	UNCERTAIN
582	26.9717	26.9904	26.8449	26.8348	27.0481	26.9308	26.796	26.875	NA	NA	NA	NA	NA	803	0.0100588	0.996192	0.00200415	0.000969595	E7EU96;Q5U5J2;P68400;Q8NEV1;A0A087WY74;V9GYA2;V9GY80;V9GYW6	E7EU96;Q5U5J2;P68400;Q8NEV1	Casein kinase II subunit alpha;Casein kinase II subunit alpha 3	CSNK2A1;CSNK2A3	>tr|E7EU96|E7EU96_HUMAN Casein kinase II subunit alpha OS=Homo sapiens GN=CSNK2A1 PE=1 SV=1;>tr|Q5U5J2|Q5U5J2_HUMAN CSNK2A1 protein OS=Homo sapiens GN=CSNK2A1 PE=1 SV=1;>sp|P68400|CSK21_HUMAN Casein kinase II subunit alpha OS=Homo sapiens GN=CSNK2A1 PE=1 S	ENSG00000101266	ENSP00000217244;ENSP00000339247;ENSP00000383076;ENSP00000383086	CSK21_HUMAN;CSK23_HUMAN;E7EU96_HUMAN;Q5U5J2_HUMAN	Not Sig	logFC < 2.0	UNCERTAIN
583	28.3342	28.3787	28.3789	28.5174	28.7112	28.9629	28.9056	29.1074	NA	NA	NA	NA	NA	809	2.89894	0.238148	0.51946	0.248408	E7EVA0;P27816;H7C456;H0Y2V1;F8W9U4;H7C4C5;B5MEG9;A0A0J9YVV8;A0A0J9YW37	E7EVA0;P27816	Microtubule-associated protein;Microtubule-associated protein 4	MAP4	>tr|E7EVA0|E7EVA0_HUMAN Microtubule-associated protein OS=Homo sapiens GN=MAP4 PE=1 SV=1;>sp|P27816|MAP4_HUMAN Microtubule-associated protein 4 OS=Homo sapiens GN=MAP4 PE=1 SV=3	ENSG00000047849	ENSP00000353375;ENSP00000379083;ENSP00000397414;ENSP00000402767;ENSP00000407602	E7EVA0_HUMAN;MAP4_HUMAN	Not Sig	logFC < 2.0	UNCERTAIN
584	24.7346	24.9161	24.8987	24.6086	24.9809	24.483	24.3868	24.0155	NA	NA	NA	NA	NA	812	0.749251	0.42256	-0.32296	-0.146017	E7EVQ6;Q14534;E5RJH9;H0YBN7	E7EVQ6;Q14534	Squalene monooxygenase	SQLE	>tr|E7EVQ6|E7EVQ6_HUMAN Squalene monooxygenase OS=Homo sapiens GN=SQLE PE=1 SV=1;>sp|Q14534|ERG1_HUMAN Squalene monooxygenase OS=Homo sapiens GN=SQLE PE=1 SV=3	ENSG00000104549	ENSP00000265896;ENSP00000430331	E7EVQ6_HUMAN;ERG1_HUMAN	Not Sig	logFC < 2.0	UNCERTAIN
585	25.8014	25.5149	25.6382	25.7721	25.7218	25.652	25.6566	25.6719	NA	NA	NA	NA	NA	814	0.0308284	0.989777	-0.00608444	-0.00294238	E7EVX8;Q8WWY3;E7EU94;E7ESX0;E7EN72	E7EVX8;Q8WWY3;E7EU94;E7ESX0;E7EN72	U4/U6 small nuclear ribonucleoprotein Prp31	PRPF31	>tr|E7EVX8|E7EVX8_HUMAN U4/U6 small nuclear ribonucleoprotein Prp31 OS=Homo sapiens GN=PRPF31 PE=1 SV=1;>sp|Q8WWY3|PRP31_HUMAN U4/U6 small nuclear ribonucleoprotein Prp31 OS=Homo sapiens GN=PRPF31 PE=1 SV=2;>tr|E7EU94|E7EU94_HUMAN U4/U6 small nuclear ribon	ENSG00000105618;ENSG00000267847;ENSG00000268383;ENSG00000268495;ENSG00000268710;ENSG00000268831;ENSG00000269276;ENSG00000269379;ENSG00000269606	ENSP00000324122;ENSP00000375635;ENSP00000395089;ENSP00000395894;ENSP00000408980;ENSP00000459844;ENSP00000469212;ENSP00000470434;ENSP00000470497;ENSP00000470951;ENSP00000471591;ENSP00000472567;ENSP00000472824	E7EN72_HUMAN;E7ESX0_HUMAN;E7EU94_HUMAN;E7EVX8_HUMAN;PRP31_HUMAN	Not Sig	logFC < 2.0	UNCERTAIN
586	22.0968	20.9342	22.6523	22.5071	22.6508	21.8923	21.9686	21.7529	NA	NA	NA	NA	NA	815	0.0143024	0.976283	0.0185294	0.00760129	E7EWP0;H0Y886;O43674	E7EWP0;H0Y886;O43674	NADH dehydrogenase [ubiquinone] 1 beta subcomplex subunit 5, mitochondrial	NDUFB5	>tr|E7EWP0|E7EWP0_HUMAN NADH dehydrogenase [ubiquinone] 1 beta subcomplex subunit 5, mitochondrial OS=Homo sapiens GN=NDUFB5 PE=1 SV=1;>tr|H0Y886|H0Y886_HUMAN NADH dehydrogenase [ubiquinone] 1 beta subcomplex subunit 5, mitochondrial (Fragment) OS=Homo sap	ENSG00000136521	ENSP00000259037;ENSP00000418354;ENSP00000419248;ENSP00000419656	E7EWP0_HUMAN;H0Y886_HUMAN;NDUB5_HUMAN	Not Sig	logFC < 2.0	UNCERTAIN
587	23.7794	23.847	23.1489	23.8301	23.7466	23.9585	24.2199	24.528	NA	NA	NA	NA	NA	816	0.997687	0.306307	0.461942	0.20639	E7EWR4;P33240;E9PID8;A0A0A0MT56	E7EWR4;P33240;E9PID8	Cleavage stimulation factor subunit 2	CSTF2	>tr|E7EWR4|E7EWR4_HUMAN Cleavage stimulation factor subunit 2 OS=Homo sapiens GN=CSTF2 PE=1 SV=1;>sp|P33240|CSTF2_HUMAN Cleavage stimulation factor subunit 2 OS=Homo sapiens GN=CSTF2 PE=1 SV=1;>tr|E9PID8|E9PID8_HUMAN Cleavage stimulation factor subunit 2 O	ENSG00000101811	ENSP00000362063;ENSP00000387996;ENSP00000415705;ENSP00000432060	CSTF2_HUMAN;E7EWR4_HUMAN;E9PID8_HUMAN	Not Sig	logFC < 2.0	UNCERTAIN
588	27.0574	26.928	26.5989	27.1135	26.7501	26.8174	26.9291	27.1422	NA	NA	NA	NA	NA	817	0.0354661	0.979272	-0.0147529	-0.00688192	E7EX17;P23588;F8VX11;F8VSC7;F8VP89;F8VYE9;F8W0K0;F8VRU1	E7EX17;P23588;F8VX11;F8VSC7;F8VP89	Eukaryotic translation initiation factor 4B	EIF4B	>tr|E7EX17|E7EX17_HUMAN Eukaryotic translation initiation factor 4B OS=Homo sapiens GN=EIF4B PE=1 SV=1;>sp|P23588|IF4B_HUMAN Eukaryotic translation initiation factor 4B OS=Homo sapiens GN=EIF4B PE=1 SV=2;>tr|F8VX11|F8VX11_HUMAN Eukaryotic translation initi	ENSG00000063046	ENSP00000262056;ENSP00000388806;ENSP00000448365;ENSP00000449746;ENSP00000450324	E7EX17_HUMAN;F8VP89_HUMAN;F8VSC7_HUMAN;F8VX11_HUMAN;IF4B_HUMAN	Not Sig	logFC < 2.0	UNCERTAIN
589	25.8094	25.9333	26.1791	25.9979	25.9093	25.8634	25.9464	25.7978	NA	NA	NA	NA	NA	818	0.564036	0.769671	-0.100698	-0.0483325	E7EX44;Q05682	E7EX44;Q05682	Caldesmon	CALD1	>tr|E7EX44|E7EX44_HUMAN Caldesmon OS=Homo sapiens GN=CALD1 PE=1 SV=1;>sp|Q05682|CALD1_HUMAN Caldesmon OS=Homo sapiens GN=CALD1 PE=1 SV=3	ENSG00000122786	ENSP00000354513;ENSP00000354826;ENSP00000355000;ENSP00000376826;ENSP00000393621;ENSP00000395710;ENSP00000398826;ENSP00000419673	CALD1_HUMAN;E7EX44_HUMAN	Not Sig	logFC < 2.0	UNCERTAIN
590	27.1323	27.0128	27.1706	27.0697	27.6133	27.4368	27.4043	27.4506	NA	NA	NA	NA	NA	819	3.20877	0.347555	0.379918	0.184585	E7EX90;Q14203;Q6AWB1;E7EWF7;C9JJD0;C9JKG6;E9PCY0;C9JZA4;C9JTE5;C9JJN7;C9J1B7	E7EX90;Q14203;Q6AWB1	Dynactin subunit 1	DCTN1;DKFZp686E0752	>tr|E7EX90|E7EX90_HUMAN Dynactin subunit 1 OS=Homo sapiens GN=DCTN1 PE=1 SV=1;>sp|Q14203|DCTN1_HUMAN Dynactin subunit 1 OS=Homo sapiens GN=DCTN1 PE=1 SV=3;>tr|Q6AWB1|Q6AWB1_HUMAN Dynactin subunit 1 OS=Homo sapiens GN=DKFZp686E0752 PE=1 SV=1	ENSG00000204843	ENSP00000354791;ENSP00000384844;ENSP00000386406;ENSP00000386843;ENSP00000387270;ENSP00000387327;ENSP00000416711	DCTN1_HUMAN;E7EX90_HUMAN;Q6AWB1_HUMAN	Not Sig	logFC < 2.0	UNCERTAIN
591	27.8187	27.8182	27.1511	27.9658	27.1788	27.8659	27.5393	28.0842	NA	NA	NA	NA	NA	822	0.0272489	0.966378	-0.02139	-0.00942746	F8VZJ2;H0YHX9;Q13765;E9PAV3;F8W0W4;F8W1N5;F8VNW4;F8VZ58;Q9BZK3	F8VZJ2;H0YHX9;Q13765;E9PAV3;F8W0W4;F8W1N5;F8VNW4	Nascent polypeptide-associated complex subunit alpha;Nascent polypeptide-associated complex subunit alpha, muscle-specific form	NACA	>tr|F8VZJ2|F8VZJ2_HUMAN Nascent polypeptide-associated complex subunit alpha OS=Homo sapiens GN=NACA PE=1 SV=1;>tr|H0YHX9|H0YHX9_HUMAN Nascent polypeptide-associated complex subunit alpha (Fragment) OS=Homo sapiens GN=NACA PE=1 SV=1;>sp|Q13765|NACA_HUMAN N	ENSG00000196531	ENSP00000349212;ENSP00000377469;ENSP00000403817;ENSP00000446801;ENSP00000446933;ENSP00000447133;ENSP00000447705;ENSP00000447821;ENSP00000448039;ENSP00000450383	E9PAV3_HUMAN;F8VNW4_HUMAN;F8VZJ2_HUMAN;F8W0W4_HUMAN;F8W1N5_HUMAN;H0YHX9_HUMAN;NACA_HUMAN	Not Sig	logFC < 2.0	UNCERTAIN
592	27.6008	27.6495	27.3123	27.3086	28.1307	28.1383	28.0943	28.0446	NA	NA	NA	NA	NA	823	3.28987	0.180818	0.634154	0.302863	E9PB61;Q86V81	E9PB61;Q86V81	THO complex subunit 4	ALYREF	>tr|E9PB61|E9PB61_HUMAN THO complex subunit 4 OS=Homo sapiens GN=ALYREF PE=1 SV=1;>sp|Q86V81|THOC4_HUMAN THO complex subunit 4 OS=Homo sapiens GN=ALYREF PE=1 SV=3	ENSG00000183684	ENSP00000331817;ENSP00000421592	E9PB61_HUMAN;THOC4_HUMAN	Not Sig	logFC < 2.0	UNCERTAIN
593	22.9495	22.7896	21.5104	22.9136	20.7399	22.7331	22.9469	23.1636	NA	NA	NA	NA	NA	824	0.0794837	0.739806	-0.144887	-0.054532	E9PB93;O15514;E9PHV4	E9PB93;O15514	DNA-directed RNA polymerase II subunit RPB4	POLR2D	>tr|E9PB93|E9PB93_HUMAN DNA-directed RNA polymerase II subunit RPB4 OS=Homo sapiens GN=POLR2D PE=1 SV=1;>sp|O15514|RPB4_HUMAN DNA-directed RNA polymerase II subunit RPB4 OS=Homo sapiens GN=POLR2D PE=1 SV=1	ENSG00000144231	ENSP00000272645;ENSP00000387117	E9PB93_HUMAN;RPB4_HUMAN	Not Sig	logFC < 2.0	UNCERTAIN
594	22.5132	22.1291	22.5719	22.3798	22.5132	22.5355	22.7088	22.548	NA	NA	NA	NA	NA	825	0.821255	0.619402	0.177843	0.0843631	F6PQP6;E9PBC1;O95208;I3L2B2;J3QLN2;J3KSF8;J3KTF6;J3KSA6;J3KSC7;I3L356;I3L2H1	F6PQP6;E9PBC1;O95208;I3L2B2	Epsin-2	EPN2	>tr|F6PQP6|F6PQP6_HUMAN Epsin-2 (Fragment) OS=Homo sapiens GN=EPN2 PE=1 SV=7;>tr|E9PBC1|E9PBC1_HUMAN Epsin-2 OS=Homo sapiens GN=EPN2 PE=1 SV=1;>sp|O95208|EPN2_HUMAN Epsin-2 OS=Homo sapiens GN=EPN2 PE=1 SV=3;>tr|I3L2B2|I3L2B2_HUMAN Epsin-2 OS=Homo sapiens G	ENSG00000072134	ENSP00000320543;ENSP00000378988;ENSP00000378990;ENSP00000459542	E9PBC1_HUMAN;EPN2_HUMAN;F6PQP6_HUMAN;I3L2B2_HUMAN	Not Sig	logFC < 2.0	UNCERTAIN
595	25.9083	25.9973	25.7742	25.7314	26.8706	26.669	26.9548	26.6139	NA	NA	NA	NA	NA	826	4.00743	0.0666709	0.924253	0.439815	E9PC52;Q16576;Q5JP02;Q5JP01;Q5JNZ6	E9PC52;Q16576	Histone-binding protein RBBP7	RBBP7	>tr|E9PC52|E9PC52_HUMAN Histone-binding protein RBBP7 OS=Homo sapiens GN=RBBP7 PE=1 SV=1;>sp|Q16576|RBBP7_HUMAN Histone-binding protein RBBP7 OS=Homo sapiens GN=RBBP7 PE=1 SV=1	ENSG00000102054	ENSP00000369424;ENSP00000369427;ENSP00000386068	E9PC52_HUMAN;RBBP7_HUMAN	Not Sig	logFC < 2.0	UNCERTAIN
596	23.4684	23.6584	23.8074	23.4322	24.5674	24.024	23.9531	23.3831	NA	NA	NA	NA	NA	827	0.743888	0.370229	0.390315	0.172897	E9PC74;Q13144	E9PC74;Q13144	Translation initiation factor eIF-2B subunit epsilon	EIF2B5	>tr|E9PC74|E9PC74_HUMAN Translation initiation factor eIF-2B subunit epsilon OS=Homo sapiens GN=EIF2B5 PE=1 SV=1;>sp|Q13144|EI2BE_HUMAN Translation initiation factor eIF-2B subunit epsilon OS=Homo sapiens GN=EIF2B5 PE=1 SV=3	ENSG00000145191	ENSP00000273783;ENSP00000409142	E9PC74_HUMAN;EI2BE_HUMAN	Not Sig	logFC < 2.0	UNCERTAIN
597	27.8461	27.8458	28.0212	28.0818	29.7579	29.4216	29.3431	29.4474	NA	NA	NA	NA	NA	828	5.09932	0.0127559	1.54377	0.731813	E9PD68;Q14194	E9PD68;Q14194	Dihydropyrimidinase-related protein 1	CRMP1	>tr|E9PD68|E9PD68_HUMAN Dihydropyrimidinase-related protein 1 OS=Homo sapiens GN=CRMP1 PE=1 SV=1;>sp|Q14194|DPYL1_HUMAN Dihydropyrimidinase-related protein 1 OS=Homo sapiens GN=CRMP1 PE=1 SV=1	ENSG00000072832	ENSP00000321606;ENSP00000380987;ENSP00000425742;ENSP00000441150	DPYL1_HUMAN;E9PD68_HUMAN	Not Sig	logFC < 2.0	UNCERTAIN
598	23.7541	23.2367	23.2891	23.2351	24.4201	24.6303	24.6483	24.6245	NA	NA	NA	NA	NA	829	3.91957	0.0307979	1.20204	0.562551	E9PDE8;O95757;D6RJ96	E9PDE8;O95757;D6RJ96	Heat shock 70 kDa protein 4L	HSPA4L	>tr|E9PDE8|E9PDE8_HUMAN Heat shock 70 kDa protein 4L OS=Homo sapiens GN=HSPA4L PE=1 SV=1;>sp|O95757|HS74L_HUMAN Heat shock 70 kDa protein 4L OS=Homo sapiens GN=HSPA4L PE=1 SV=3;>tr|D6RJ96|D6RJ96_HUMAN Heat shock 70 kDa protein 4L (Fragment) OS=Homo sapiens	ENSG00000164070	ENSP00000296464;ENSP00000422482;ENSP00000425645;ENSP00000427305	D6RJ96_HUMAN;E9PDE8_HUMAN;HS74L_HUMAN	Not Sig	logFC < 2.0	UNCERTAIN
599	26.7511	27.0684	27.1789	26.4793	27.0699	26.5105	26.2967	25.8642	NA	NA	NA	NA	NA	830	0.713131	0.335025	-0.434078	-0.189014	E9PDF6;O43795;E7EQD9;H7C2Y7;C9JYW1;A0A0U1RRI3;C9JUP5;Q9UBC5;C9K0I9;G3V342;F5H2J1;Q8WXR4	E9PDF6;O43795	Unconventional myosin-Ib	MYO1B	>tr|E9PDF6|E9PDF6_HUMAN Unconventional myosin-Ib OS=Homo sapiens GN=MYO1B PE=1 SV=1;>sp|O43795|MYO1B_HUMAN Unconventional myosin-Ib OS=Homo sapiens GN=MYO1B PE=1 SV=3	ENSG00000128641	ENSP00000306382;ENSP00000341903;ENSP00000376130;ENSP00000376132	E9PDF6_HUMAN;MYO1B_HUMAN	Not Sig	logFC < 2.0	UNCERTAIN
600	23.5541	23.5082	23.1276	23.1135	23.2782	23.8647	23.4933	23.976	NA	NA	NA	NA	NA	832	0.810444	0.417893	0.327164	0.148643	E9PE17;I3L0E3;Q9Y2R5	E9PE17;I3L0E3;Q9Y2R5	28S ribosomal protein S17, mitochondrial	MRPS17	>tr|E9PE17|E9PE17_HUMAN 28S ribosomal protein S17, mitochondrial (Fragment) OS=Homo sapiens GN=MRPS17 PE=3 SV=1;>tr|I3L0E3|I3L0E3_HUMAN HCG1984214, isoform CRA_a OS=Homo sapiens GN=hCG_1984214 PE=3 SV=1;>sp|Q9Y2R5|RT17_HUMAN 28S ribosomal protein S17, mito	ENSG00000239789;ENSG00000249773	ENSP00000285298;ENSP00000390331;ENSP00000401349	E9PE17_HUMAN;I3L0E3_HUMAN;RT17_HUMAN	Not Sig	logFC < 2.0	UNCERTAIN
601	22.4081	20.5984	23.4387	22.3535	22.5086	22.2449	19.8616	22.0982	NA	NA	NA	NA	NA	834	0.250421	0.351376	-0.521354	-0.182983	E9PEM5;H0YAC6;P50851;H0Y9N9	E9PEM5;H0YAC6;P50851	Lipopolysaccharide-responsive and beige-like anchor protein	LRBA	>tr|E9PEM5|E9PEM5_HUMAN Lipopolysaccharide-responsive and beige-like anchor protein OS=Homo sapiens GN=LRBA PE=1 SV=1;>tr|H0YAC6|H0YAC6_HUMAN Lipopolysaccharide-responsive and beige-like anchor protein (Fragment) OS=Homo sapiens GN=LRBA PE=1 SV=1;>sp|P5085	ENSG00000198589	ENSP00000349629;ENSP00000421552;ENSP00000422180;ENSP00000426669	E9PEM5_HUMAN;H0YAC6_HUMAN;LRBA_HUMAN	Not Sig	logFC < 2.0	UNCERTAIN
602	23.5302	23.285	23.266	23.1797	24.2097	23.7103	24.0604	23.6573	NA	NA	NA	NA	NA	836	2.07866	0.210111	0.59422	0.275885	E9PF16;Q96CM8;D6RF87	E9PF16;Q96CM8	Acyl-CoA synthetase family member 2, mitochondrial	ACSF2	>tr|E9PF16|E9PF16_HUMAN Acyl-CoA synthetase family member 2, mitochondrial OS=Homo sapiens GN=ACSF2 PE=1 SV=1;>sp|Q96CM8|ACSF2_HUMAN Acyl-CoA synthetase family member 2, mitochondrial OS=Homo sapiens GN=ACSF2 PE=1 SV=2	ENSG00000167107	ENSP00000300441;ENSP00000425964	ACSF2_HUMAN;E9PF16_HUMAN	Not Sig	logFC < 2.0	UNCERTAIN
603	22.6499	20.9942	22.8567	22.5031	22.8936	22.6697	21.6041	22.2322	NA	NA	NA	NA	NA	837	0.0690653	0.812051	0.0989194	0.03939	E9PF19;Q9Y4P3;Q96E41	E9PF19;Q9Y4P3;Q96E41	Transducin beta-like protein 2	TBL2	>tr|E9PF19|E9PF19_HUMAN Transducin beta-like protein 2 OS=Homo sapiens GN=TBL2 PE=1 SV=1;>sp|Q9Y4P3|TBL2_HUMAN Transducin beta-like protein 2 OS=Homo sapiens GN=TBL2 PE=1 SV=1;>tr|Q96E41|Q96E41_HUMAN TBL2 protein OS=Homo sapiens GN=TBL2 PE=1 SV=1	ENSG00000106638;ENSG00000263049	ENSP00000307260;ENSP00000413979;ENSP00000460222	E9PF19_HUMAN;Q96E41_HUMAN;TBL2_HUMAN	Not Sig	logFC < 2.0	UNCERTAIN
604	21.2709	21.9904	22.2953	21.4059	21.5903	21.6043	20.8757	21.0067	NA	NA	NA	NA	NA	841	0.751202	0.306983	-0.471408	-0.204207	E9PFK5;P78316	E9PFK5;P78316	Nucleolar protein 14	NOP14	>tr|E9PFK5|E9PFK5_HUMAN Nucleolar protein 14 OS=Homo sapiens GN=NOP14 PE=1 SV=1;>sp|P78316|NOP14_HUMAN Nucleolar protein 14 OS=Homo sapiens GN=NOP14 PE=1 SV=3	ENSG00000087269	ENSP00000315674;ENSP00000381146;ENSP00000405068;ENSP00000427415	E9PFK5_HUMAN;NOP14_HUMAN	Not Sig	logFC < 2.0	UNCERTAIN
605	20.6853	21.5986	21.6427	21.6083	20.7957	21.4812	21.5909	21.188	NA	NA	NA	NA	NA	842	0.156707	0.749074	-0.119711	-0.0522059	E9PFN4;A0A0A0MST8	E9PFN4;A0A0A0MST8	NA	SLC4A7	>tr|E9PFN4|E9PFN4_HUMAN Anion exchange protein OS=Homo sapiens GN=SLC4A7 PE=1 SV=1;>tr|A0A0A0MST8|A0A0A0MST8_HUMAN Anion exchange protein OS=Homo sapiens GN=SLC4A7 PE=1 SV=1	ENSG00000033867	ENSP00000406804	E9PFN4_HUMAN	Not Sig	logFC < 2.0	UNCERTAIN
606	22.0388	21.756	21.4664	21.6304	21.7288	21.9852	21.6684	21.5299	NA	NA	NA	NA	NA	843	0.0112268	0.992868	0.00513124	0.00238233	E9PFZ1;Q5JPI3	E9PFZ1;Q5JPI3	Uncharacterized protein C3orf38	C3orf38	>tr|E9PFZ1|E9PFZ1_HUMAN Uncharacterized protein C3orf38 OS=Homo sapiens GN=C3orf38 PE=1 SV=1;>sp|Q5JPI3|CC038_HUMAN Uncharacterized protein C3orf38 OS=Homo sapiens GN=C3orf38 PE=1 SV=1	ENSG00000179021	ENSP00000322469;ENSP00000418774	CC038_HUMAN;E9PFZ1_HUMAN	Not Sig	logFC < 2.0	UNCERTAIN
607	23.0226	21.2586	21.4978	21.1612	20.5728	21.7694	20.7878	21.9464	NA	NA	NA	NA	NA	844	0.363239	0.352098	-0.465983	-0.182384	E9PG22;Q8IW35;F8WF91	E9PG22;Q8IW35;F8WF91	Centrosomal protein of 97 kDa	CEP97	>tr|E9PG22|E9PG22_HUMAN Centrosomal protein of 97 kDa OS=Homo sapiens GN=CEP97 PE=1 SV=1;>sp|Q8IW35|CEP97_HUMAN Centrosomal protein of 97 kDa OS=Homo sapiens GN=CEP97 PE=1 SV=1;>tr|F8WF91|F8WF91_HUMAN Centrosomal protein of 97 kDa OS=Homo sapiens GN=CEP97	ENSG00000182504	ENSP00000325881;ENSP00000342510;ENSP00000418185;ENSP00000419009	CEP97_HUMAN;E9PG22_HUMAN;F8WF91_HUMAN	Not Sig	logFC < 2.0	UNCERTAIN
608	23.0127	23.0885	23.5249	23.3203	23.4108	23.0206	22.9017	22.8456	NA	NA	NA	NA	NA	845	0.511026	0.608395	-0.191954	-0.0883575	E9PG46;Q2M2I8	E9PG46;Q2M2I8	AP2-associated protein kinase 1	AAK1	>tr|E9PG46|E9PG46_HUMAN AP2-associated protein kinase 1 OS=Homo sapiens GN=AAK1 PE=1 SV=1;>sp|Q2M2I8|AAK1_HUMAN AP2-associated protein kinase 1 OS=Homo sapiens GN=AAK1 PE=1 SV=3	ENSG00000115977	ENSP00000385181;ENSP00000386342;ENSP00000386456	AAK1_HUMAN;E9PG46_HUMAN	Not Sig	logFC < 2.0	UNCERTAIN
609	22.7001	22.8221	22.9941	22.3661	21.1464	20.6423	20.8987	21.2664	NA	NA	NA	+	Pos	846	3.98643	0.00828571	-1.73217	-0.790302	E9PG71;P54764;F8W9W0;C9JXA2;F8VP57;B7ZKW7;B7ZKJ3;P29320;P54756	E9PG71;P54764	Ephrin type-A receptor 4	EPHA4	>tr|E9PG71|E9PG71_HUMAN Ephrin type-A receptor 4 OS=Homo sapiens GN=EPHA4 PE=1 SV=1;>sp|P54764|EPHA4_HUMAN Ephrin type-A receptor 4 OS=Homo sapiens GN=EPHA4 PE=1 SV=1	ENSG00000116106	ENSP00000281821;ENSP00000386276;ENSP00000386829	E9PG71_HUMAN;EPHA4_HUMAN	FDR < 0.01	logFC < 2.0	REGULATED but logFC < 2.0
610	23.4643	23.7505	23.816	23.1619	24.2318	23.5277	23.5142	23.4814	NA	NA	NA	NA	NA	847	0.242864	0.70419	0.140604	0.0629076	E9PGC0;P20936	E9PGC0;P20936	Ras GTPase-activating protein 1	RASA1	>tr|E9PGC0|E9PGC0_HUMAN Ras GTPase-activating protein 1 OS=Homo sapiens GN=RASA1 PE=1 SV=1;>sp|P20936|RASA1_HUMAN Ras GTPase-activating protein 1 OS=Homo sapiens GN=RASA1 PE=1 SV=1	ENSG00000145715	ENSP00000274376;ENSP00000411221;ENSP00000420905	E9PGC0_HUMAN;RASA1_HUMAN	Not Sig	logFC < 2.0	UNCERTAIN
611	25.5576	25.3967	25.872	25.6832	25.0077	25.0498	25.028	24.8416	NA	NA	NA	NA	NA	848	2.94322	0.179955	-0.645583	-0.305806	E9PGC8;P78559	E9PGC8;P78559	Microtubule-associated protein 1A;MAP1A heavy chain;MAP1 light chain LC2	MAP1A	>tr|E9PGC8|E9PGC8_HUMAN Microtubule-associated protein 1A OS=Homo sapiens GN=MAP1A PE=1 SV=1;>sp|P78559|MAP1A_HUMAN Microtubule-associated protein 1A OS=Homo sapiens GN=MAP1A PE=1 SV=6	ENSG00000166963	ENSP00000300231;ENSP00000371462	E9PGC8_HUMAN;MAP1A_HUMAN	Not Sig	logFC < 2.0	UNCERTAIN
612	28.4641	28.5956	28.804	28.2115	28.6065	28.4188	28.3595	28.2129	NA	NA	NA	NA	NA	849	0.344992	0.734977	-0.119362	-0.0555588	E9PGM1;E7EX73;E7EUU4;Q04637;A0A0A0MR52;C9JF13;C9J6B6;C9K073;C9J2Z7;H7C044;H7C0V6;REV__F5H7J8;REV__Q8NEG2;REV__C9JQZ6;REV__J3KQX6;F8WCF2;C9J987;C9JWH7;C9J556;C9JHW9;C9JSU8;C9JWW9	E9PGM1;E7EX73;E7EUU4;Q04637;A0A0A0MR52	Eukaryotic translation initiation factor 4 gamma 1	EIF4G1	>tr|E9PGM1|E9PGM1_HUMAN Eukaryotic translation initiation factor 4 gamma 1 OS=Homo sapiens GN=EIF4G1 PE=1 SV=1;>tr|E7EX73|E7EX73_HUMAN Eukaryotic translation initiation factor 4 gamma 1 OS=Homo sapiens GN=EIF4G1 PE=1 SV=1;>tr|E7EUU4|E7EUU4_HUMAN Eukaryotic	ENSG00000114867	ENSP00000316879;ENSP00000317600;ENSP00000323737;ENSP00000376320;ENSP00000391935;ENSP00000395974;ENSP00000399858;ENSP00000404754;ENSP00000407682	E7EUU4_HUMAN;E7EX73_HUMAN;E9PGM1_HUMAN;IF4G1_HUMAN	Not Sig	logFC < 2.0	UNCERTAIN
613	21.6844	21.6838	21.5225	21.7118	21.5616	21.5776	21.5268	21.6683	NA	NA	NA	NA	NA	850	0.60156	0.841644	-0.0670276	-0.0326538	E9PGM9;P78332;C9J250;F8WCA5	E9PGM9;P78332	RNA-binding protein 6	RBM6	>tr|E9PGM9|E9PGM9_HUMAN RNA-binding protein 6 OS=Homo sapiens GN=RBM6 PE=1 SV=1;>sp|P78332|RBM6_HUMAN RNA-binding protein 6 OS=Homo sapiens GN=RBM6 PE=1 SV=5	ENSG00000004534	ENSP00000266022;ENSP00000392939;ENSP00000393530;ENSP00000396466	E9PGM9_HUMAN;RBM6_HUMAN	Not Sig	logFC < 2.0	UNCERTAIN
614	21.7585	21.8644	21.8935	21.8017	21.9145	21.8788	21.6005	21.2368	NA	NA	NA	NA	NA	851	0.490082	0.636868	-0.171835	-0.079561	E9PGT3;Q15418;Q5SVM7	E9PGT3;Q15418	Ribosomal protein S6 kinase;Ribosomal protein S6 kinase alpha-1	RPS6KA1	>tr|E9PGT3|E9PGT3_HUMAN Ribosomal protein S6 kinase OS=Homo sapiens GN=RPS6KA1 PE=1 SV=1;>sp|Q15418|KS6A1_HUMAN Ribosomal protein S6 kinase alpha-1 OS=Homo sapiens GN=RPS6KA1 PE=1 SV=2	ENSG00000117676	ENSP00000363277;ENSP00000363281;ENSP00000363283;ENSP00000431651;ENSP00000435412	E9PGT3_HUMAN;KS6A1_HUMAN	Not Sig	logFC < 2.0	UNCERTAIN
615	23.9326	23.5495	22.9529	23.5279	23.1611	23.4517	23.4643	23.8939	NA	NA	NA	NA	NA	853	0.00269168	0.99647	0.00203514	0.000903652	E9PH64;Q9Y6M9;E7EWZ0;E9PF49	E9PH64;Q9Y6M9;E7EWZ0;E9PF49	NADH dehydrogenase [ubiquinone] 1 beta subcomplex subunit 9	NDUFB9	>tr|E9PH64|E9PH64_HUMAN NADH dehydrogenase [ubiquinone] 1 beta subcomplex subunit 9 OS=Homo sapiens GN=NDUFB9 PE=1 SV=1;>sp|Q9Y6M9|NDUB9_HUMAN NADH dehydrogenase [ubiquinone] 1 beta subcomplex subunit 9 OS=Homo sapiens GN=NDUFB9 PE=1 SV=3;>tr|E7EWZ0|E7EWZ0	ENSG00000147684	ENSP00000276689;ENSP00000428282;ENSP00000430322;ENSP00000431115	E7EWZ0_HUMAN;E9PF49_HUMAN;E9PH64_HUMAN;NDUB9_HUMAN	Not Sig	logFC < 2.0	UNCERTAIN
616	22.5318	22.1343	22.5133	22.4609	21.3636	21.146	21.779	21.0227	NA	NA	NA	NA	NA	854	2.89324	0.0473198	-1.08224	-0.494084	H0Y8E4;E9PH70;Q9ULH0;H7C584	H0Y8E4;E9PH70;Q9ULH0	Kinase D-interacting substrate of 220 kDa	KIDINS220	>tr|H0Y8E4|H0Y8E4_HUMAN Kinase D-interacting substrate of 220 kDa (Fragment) OS=Homo sapiens GN=KIDINS220 PE=1 SV=1;>tr|E9PH70|E9PH70_HUMAN Kinase D-interacting substrate of 220 kDa (Fragment) OS=Homo sapiens GN=KIDINS220 PE=1 SV=1;>sp|Q9ULH0|KDIS_HUMAN Ki	ENSG00000134313	ENSP00000256707;ENSP00000319947;ENSP00000411849;ENSP00000414923;ENSP00000418974;ENSP00000419964;ENSP00000420364	E9PH70_HUMAN;H0Y8E4_HUMAN;KDIS_HUMAN	Not Sig	logFC < 2.0	UNCERTAIN
617	21.8966	21.8323	22.1129	20.7275	22.2158	21.2239	20.809	19.4963	NA	NA	NA	NA	NA	855	0.502204	0.222432	-0.706031	-0.267083	F5H105;F5H8L7;E9PHB3;Q8TF68;F5H0D6;F5H3Z9;F5GYZ1;F5H6N8	F5H105;F5H8L7;E9PHB3;Q8TF68;F5H0D6;F5H3Z9;F5GYZ1;F5H6N8	Zinc finger protein 384	ZNF384	>tr|F5H105|F5H105_HUMAN Zinc finger protein 384 (Fragment) OS=Homo sapiens GN=ZNF384 PE=1 SV=1;>tr|F5H8L7|F5H8L7_HUMAN Zinc finger protein 384 (Fragment) OS=Homo sapiens GN=ZNF384 PE=1 SV=1;>tr|E9PHB3|E9PHB3_HUMAN Zinc finger protein 384 (Fragment) OS=Homo	ENSG00000126746	ENSP00000348018;ENSP00000354592;ENSP00000380013;ENSP00000380017;ENSP00000380019;ENSP00000399572;ENSP00000412911;ENSP00000437488;ENSP00000438047;ENSP00000438555;ENSP00000439736;ENSP00000441408	E9PHB3_HUMAN;F5GYZ1_HUMAN;F5H0D6_HUMAN;F5H105_HUMAN;F5H3Z9_HUMAN;F5H6N8_HUMAN;F5H8L7_HUMAN;ZN384_HUMAN	Not Sig	logFC < 2.0	UNCERTAIN
618	21.6007	21.6213	21.7683	19.646	21.4015	21.1945	20.7446	21.6543	NA	NA	NA	NA	NA	857	0.058567	0.83039	0.0896626	0.0352843	H0Y742;E9PHI4;O94901;H0Y6N5;H7C3X3;H7C2K3	H0Y742;E9PHI4;O94901;H0Y6N5	SUN domain-containing protein 1	SUN1	>tr|H0Y742|H0Y742_HUMAN SUN domain-containing protein 1 (Fragment) OS=Homo sapiens GN=SUN1 PE=1 SV=1;>tr|E9PHI4|E9PHI4_HUMAN SUN domain-containing protein 1 OS=Homo sapiens GN=SUN1 PE=1 SV=1;>sp|O94901|SUN1_HUMAN SUN domain-containing protein 1 OS=Homo sap	ENSG00000164828	ENSP00000374225;ENSP00000383947;ENSP00000384015;ENSP00000384116;ENSP00000392309;ENSP00000395952;ENSP00000406653;ENSP00000409909;ENSP00000413439	E9PHI4_HUMAN;H0Y6N5_HUMAN;H0Y742_HUMAN;SUN1_HUMAN	Not Sig	logFC < 2.0	UNCERTAIN
619	21.6021	21.7365	21.4933	21.6247	21.7453	20.9817	20.9822	19.8901	NA	NA	NA	NA	NA	859	0.947481	0.183127	-0.714317	-0.299519	E9PI60;Q9ULD4;E9PSF3;H0Y7I6;H0Y7B4;F6XDC4	E9PI60;Q9ULD4;E9PSF3	Bromodomain and PHD finger-containing protein 3	BRPF3	>tr|E9PI60|E9PI60_HUMAN Bromodomain and PHD finger-containing protein 3 OS=Homo sapiens GN=BRPF3 PE=1 SV=1;>sp|Q9ULD4|BRPF3_HUMAN Bromodomain and PHD finger-containing protein 3 OS=Homo sapiens GN=BRPF3 PE=1 SV=2;>tr|E9PSF3|E9PSF3_HUMAN Bromodomain and PHD	ENSG00000096070	ENSP00000350267;ENSP00000416842;ENSP00000436504	BRPF3_HUMAN;E9PI60_HUMAN;E9PSF3_HUMAN	Not Sig	logFC < 2.0	UNCERTAIN
620	23.0845	22.7438	22.6558	22.8217	20.9922	19.4643	22.8251	22.6148	NA	NA	NA	NA	NA	860	0.860067	0.0514397	-1.35234	-0.484607	U3KQ69;E9PI62;Q9BT17;E7EVK2	U3KQ69;E9PI62;Q9BT17;E7EVK2	Mitochondrial GTPase 1;Mitochondrial ribosome-associated GTPase 1	MTG1	>tr|U3KQ69|U3KQ69_HUMAN Mitochondrial GTPase 1 OS=Homo sapiens GN=MTG1 PE=3 SV=1;>tr|E9PI62|E9PI62_HUMAN Mitochondrial GTPase 1 OS=Homo sapiens PE=3 SV=1;>sp|Q9BT17|MTG1_HUMAN Mitochondrial ribosome-associated GTPase 1 OS=Homo sapiens GN=MTG1 PE=1 SV=2;>tr	ENSG00000148824;ENSG00000254536	ENSP00000393480;ENSP00000436767	E7EVK2_HUMAN;E9PI62_HUMAN;MTG1_HUMAN	Not Sig	logFC < 2.0	UNCERTAIN
621	22.711	22.6074	22.6878	23.2555	21.8182	22.7997	22.5082	22.6828	NA	NA	NA	NA	NA	861	0.658163	0.392557	-0.363196	-0.160346	Q5T6K7;E9PI99;Q5T6K5;Q13952;A0A0A0MT00;E9PJA8;E9PQR2;A0A087WXG1	Q5T6K7;E9PI99;Q5T6K5;Q13952;A0A0A0MT00	Nuclear transcription factor Y subunit gamma	NFYC	>tr|Q5T6K7|Q5T6K7_HUMAN Nuclear transcription factor Y subunit gamma (Fragment) OS=Homo sapiens GN=NFYC PE=1 SV=1;>tr|E9PI99|E9PI99_HUMAN Nuclear transcription factor Y subunit gamma (Fragment) OS=Homo sapiens GN=NFYC PE=1 SV=1;>tr|Q5T6K5|Q5T6K5_HUMAN Nucl	ENSG00000066136	ENSP00000312617;ENSP00000361734;ENSP00000361736;ENSP00000361737;ENSP00000361738;ENSP00000361754;ENSP00000396620;ENSP00000397647;ENSP00000404427;ENSP00000408315;ENSP00000408867;ENSP00000414299;ENSP00000436710	E9PI99_HUMAN;NFYC_HUMAN;Q5T6K5_HUMAN;Q5T6K7_HUMAN	Not Sig	logFC < 2.0	UNCERTAIN
622	23.8872	23.7988	23.4311	23.5608	24.9793	25.1419	25.3646	21.6418	NA	NA	NA	NA	NA	865	0.286521	0.297656	0.61244	0.211931	E9PIM6;E9PNQ8;P04216;J3QRJ3	E9PIM6;E9PNQ8;P04216;J3QRJ3	Thy-1 membrane glycoprotein	THY1	>tr|E9PIM6|E9PIM6_HUMAN Thy-1 membrane glycoprotein (Fragment) OS=Homo sapiens GN=THY1 PE=1 SV=7;>tr|E9PNQ8|E9PNQ8_HUMAN Thy-1 membrane glycoprotein (Fragment) OS=Homo sapiens GN=THY1 PE=1 SV=1;>sp|P04216|THY1_HUMAN Thy-1 membrane glycoprotein OS=Homo sapi	ENSG00000154096	ENSP00000284240;ENSP00000431301;ENSP00000432808;ENSP00000435753;ENSP00000464248	E9PIM6_HUMAN;E9PNQ8_HUMAN;J3QRJ3_HUMAN;THY1_HUMAN	Not Sig	logFC < 2.0	UNCERTAIN
623	20.9716	20.7294	20.0421	22.0246	22.5783	22.2205	21.008	22.2413	NA	NA	NA	NA	NA	867	1.0312	0.0762507	1.07012	0.421904	E9PJ42;Q5BJD5	E9PJ42;Q5BJD5	Transmembrane protein 41B	TMEM41B	>tr|E9PJ42|E9PJ42_HUMAN Transmembrane protein 41B OS=Homo sapiens GN=TMEM41B PE=1 SV=1;>sp|Q5BJD5|TM41B_HUMAN Transmembrane protein 41B OS=Homo sapiens GN=TMEM41B PE=1 SV=1	ENSG00000166471	ENSP00000299596;ENSP00000431934;ENSP00000433126;ENSP00000435685;ENSP00000436480	E9PJ42_HUMAN;TM41B_HUMAN	Not Sig	logFC < 2.0	UNCERTAIN
624	24.1687	24.0398	24.2378	24.2291	23.1034	22.5257	22.7683	22.6266	NA	NA	NA	NA	NA	870	4.36726	0.0181769	-1.41286	-0.66205	E9PJH7;Q9H936;A0A0D9SFE1;A0A0D9SFA8;K4DIB0;K4DIA2;A0A0D9SG84;E9PI74;E9PQ36;K4DIB6;K4DIB3;K4DIB8;K4DIA8;A0A0D9SEI9;Q9H1K4	E9PJH7;Q9H936;A0A0D9SFE1	Mitochondrial glutamate carrier 1	SLC25A22	>tr|E9PJH7|E9PJH7_HUMAN Mitochondrial glutamate carrier 1 (Fragment) OS=Homo sapiens GN=SLC25A22 PE=1 SV=5;>sp|Q9H936|GHC1_HUMAN Mitochondrial glutamate carrier 1 OS=Homo sapiens GN=SLC25A22 PE=1 SV=1;>tr|A0A0D9SFE1|A0A0D9SFE1_HUMAN Mitochondrial glutamate	ENSG00000177542	ENSP00000322020;ENSP00000431829;ENSP00000437236	E9PJH7_HUMAN;GHC1_HUMAN	Not Sig	logFC < 2.0	UNCERTAIN
625	24.4353	24.2326	24.2421	24.4036	23.8103	24.2211	24.337	24.198	NA	NA	NA	NA	NA	871	0.722821	0.60985	-0.186818	-0.0878642	E9PS17;E9PK59;Q96KG9;E9PPN3;A0A0A0MQX4;H0YCI6;H0YDH0	E9PS17;E9PK59;Q96KG9;E9PPN3	N-terminal kinase-like protein	SCYL1	>tr|E9PS17|E9PS17_HUMAN N-terminal kinase-like protein OS=Homo sapiens GN=SCYL1 PE=1 SV=1;>tr|E9PK59|E9PK59_HUMAN N-terminal kinase-like protein OS=Homo sapiens GN=SCYL1 PE=1 SV=1;>sp|Q96KG9|NTKL_HUMAN N-terminal kinase-like protein OS=Homo sapiens GN=SCYL	ENSG00000142186	ENSP00000270176;ENSP00000279270;ENSP00000408192;ENSP00000431635;ENSP00000432175;ENSP00000433450;ENSP00000436993;ENSP00000437254	E9PK59_HUMAN;E9PPN3_HUMAN;E9PS17_HUMAN;NTKL_HUMAN	Not Sig	logFC < 2.0	UNCERTAIN
626	21.3421	21.3115	20.4646	21.2544	22.0761	21.7045	21.533	20.8212	NA	NA	NA	NA	NA	873	0.621885	0.337393	0.440525	0.18851	E9PKB7;J3KP52;H0YE88;P28347;H0YEJ9	E9PKB7;J3KP52;H0YE88;P28347;H0YEJ9	Transcriptional enhancer factor TEF-1	TEAD1	>tr|E9PKB7|E9PKB7_HUMAN Transcriptional enhancer factor TEF-1 OS=Homo sapiens GN=TEAD1 PE=1 SV=1;>tr|J3KP52|J3KP52_HUMAN Transcriptional enhancer factor TEF-1 OS=Homo sapiens GN=TEAD1 PE=1 SV=1;>tr|H0YE88|H0YE88_HUMAN Transcriptional enhancer factor TEF-1	ENSG00000187079	ENSP00000354588;ENSP00000355332;ENSP00000435233;ENSP00000435393;ENSP00000435977	E9PKB7_HUMAN;H0YE88_HUMAN;H0YEJ9_HUMAN;TEAD1_HUMAN	Not Sig	logFC < 2.0	UNCERTAIN
627	24.8806	25.0483	25.213	24.8609	25.8393	25.104	24.9733	24.8214	NA	NA	NA	NA	NA	874	0.32478	0.627829	0.183794	0.0820391	H7BXH2;E9PKF6;Q5H9R7;E9PQP7;H0YEN2;H0YDW1;E9PNN8;E9PK08;E9PKG4;H0YEV0;E9PJD8;REV__Q9H0R1;REV__E7EQ45	H7BXH2;E9PKF6;Q5H9R7;E9PQP7;H0YEN2	Serine/threonine-protein phosphatase 6 regulatory subunit 3	PPP6R3	>tr|H7BXH2|H7BXH2_HUMAN Serine/threonine-protein phosphatase 6 regulatory subunit 3 OS=Homo sapiens GN=PPP6R3 PE=1 SV=1;>tr|E9PKF6|E9PKF6_HUMAN Serine/threonine-protein phosphatase 6 regulatory subunit 3 OS=Homo sapiens GN=PPP6R3 PE=1 SV=1;>sp|Q5H9R7|PP6R3	ENSG00000110075	ENSP00000265636;ENSP00000265637;ENSP00000377389;ENSP00000377390;ENSP00000431415;ENSP00000433058;ENSP00000433565;ENSP00000434429;ENSP00000436209;ENSP00000437329	E9PKF6_HUMAN;E9PQP7_HUMAN;H0YEN2_HUMAN;H7BXH2_HUMAN;PP6R3_HUMAN	Not Sig	logFC < 2.0	UNCERTAIN
628	25.793	25.8792	26.0685	25.9958	25.3321	25.4035	25.2239	24.6746	NA	NA	NA	NA	NA	875	2.33891	0.126415	-0.77558	-0.356362	E9PKP7;P17480;E9PMM2;E9PLT2;H0YDH7	E9PKP7;P17480	Nucleolar transcription factor 1	UBTF	>tr|E9PKP7|E9PKP7_HUMAN Nucleolar transcription factor 1 OS=Homo sapiens GN=UBTF PE=1 SV=1;>sp|P17480|UBF1_HUMAN Nucleolar transcription factor 1 OS=Homo sapiens GN=UBTF PE=1 SV=1	ENSG00000108312	ENSP00000302640;ENSP00000345297;ENSP00000377231;ENSP00000390669;ENSP00000431539;ENSP00000432925;ENSP00000435708;ENSP00000437180	E9PKP7_HUMAN;UBF1_HUMAN	Not Sig	logFC < 2.0	UNCERTAIN
629	22.3053	22.2963	22.2314	22.2204	21.0708	21.6095	22.4805	20.9327	NA	NA	NA	NA	NA	877	1.09734	0.171992	-0.739991	-0.314684	E9PKR8;H3BRY5;P50226;P50225;H3BQX5;E9PM76;E9PKW4;H3BNY7;A0A0A6YYL2;P0DMN0;P0DMM9	E9PKR8;H3BRY5;P50226;P50225;H3BQX5;E9PM76;E9PKW4	Sulfotransferase;Sulfotransferase 1A2;Sulfotransferase 1A1	SULT1A2;SULT1A1	>tr|E9PKR8|E9PKR8_HUMAN Sulfotransferase (Fragment) OS=Homo sapiens GN=SULT1A2 PE=1 SV=1;>tr|H3BRY5|H3BRY5_HUMAN Sulfotransferase (Fragment) OS=Homo sapiens GN=SULT1A1 PE=1 SV=1;>sp|P50226|ST1A2_HUMAN Sulfotransferase 1A2 OS=Homo sapiens GN=SULT1A2 PE=1 SV	ENSG00000196502;ENSG00000197165	ENSP00000321988;ENSP00000329399;ENSP00000338742;ENSP00000378971;ENSP00000378972;ENSP00000378992;ENSP00000433075;ENSP00000435271;ENSP00000435358;ENSP00000455979;ENSP00000456459;ENSP00000457912	E9PKR8_HUMAN;E9PKW4_HUMAN;E9PM76_HUMAN;H3BQX5_HUMAN;H3BRY5_HUMAN;ST1A1_HUMAN;ST1A2_HUMAN	Not Sig	logFC < 2.0	UNCERTAIN
630	28.4839	28.2677	28.2661	28.5925	28.6455	28.432	28.3169	28.0646	NA	NA	NA	NA	NA	880	0.09465	0.921921	-0.037797	-0.017614	E9PKZ0;P62917;G3V1A1;E9PKU4;E9PP36	E9PKZ0;P62917;G3V1A1;E9PKU4	60S ribosomal protein L8	RPL8	>tr|E9PKZ0|E9PKZ0_HUMAN 60S ribosomal protein L8 (Fragment) OS=Homo sapiens GN=RPL8 PE=1 SV=1;>sp|P62917|RL8_HUMAN 60S ribosomal protein L8 OS=Homo sapiens GN=RPL8 PE=1 SV=2;>tr|G3V1A1|G3V1A1_HUMAN 60S ribosomal protein L8 OS=Homo sapiens GN=RPL8 PE=1 SV=1	ENSG00000161016	ENSP00000262584;ENSP00000378378;ENSP00000433464;ENSP00000433703;ENSP00000434535;ENSP00000435313	E9PKU4_HUMAN;E9PKZ0_HUMAN;G3V1A1_HUMAN;RL8_HUMAN	Not Sig	logFC < 2.0	UNCERTAIN
631	24.653	24.5782	24.3346	24.3474	23.427	23.5599	23.7242	24.0881	NA	NA	NA	NA	NA	881	2.49613	0.12252	-0.778497	-0.359711	E9PL57;Q86V88	E9PL57	NA	NEDD8-MDP1	>tr|E9PL57|E9PL57_HUMAN Protein NEDD8-MDP1 (Fragment) OS=Homo sapiens GN=NEDD8-MDP1 PE=4 SV=1	ENSG00000255526	ENSP00000431482	E9PL57_HUMAN	Not Sig	logFC < 2.0	UNCERTAIN
632	22.8725	22.4014	22.8606	23.1272	22.0019	22.5957	22.4582	22.9562	NA	NA	NA	NA	NA	885	0.592761	0.443179	-0.312408	-0.138941	E9PQD0;E9PS30;E9PLI6;E9PS76;Q8N9N8	E9PQD0;E9PS30;E9PLI6;E9PS76;Q8N9N8	Probable RNA-binding protein EIF1AD	EIF1AD	>tr|E9PQD0|E9PQD0_HUMAN Probable RNA-binding protein EIF1AD OS=Homo sapiens GN=EIF1AD PE=1 SV=1;>tr|E9PS30|E9PS30_HUMAN Probable RNA-binding protein EIF1AD (Fragment) OS=Homo sapiens GN=EIF1AD PE=1 SV=1;>tr|E9PLI6|E9PLI6_HUMAN Probable RNA-binding protein	ENSG00000175376	ENSP00000309175;ENSP00000432135;ENSP00000433320;ENSP00000434056;ENSP00000435439;ENSP00000435891;ENSP00000436644;ENSP00000436876	E9PLI6_HUMAN;E9PQD0_HUMAN;E9PS30_HUMAN;E9PS76_HUMAN;EIF1A_HUMAN	Not Sig	logFC < 2.0	UNCERTAIN
633	28.1867	28.2979	28.5533	28.1317	28.2872	28.004	28.0332	27.7191	NA	NA	NA	NA	NA	886	0.966168	0.465576	-0.281539	-0.130997	E9PLK3;P55786;A6NEC2;H0YDG0;E9PP11;E9PJY4;E9PJ74;E9PPD4;E9PRQ5;H0YCQ5;E9PJF9;E9PPZ2;E9PI82	E9PLK3;P55786	Puromycin-sensitive aminopeptidase	NPEPPS	>tr|E9PLK3|E9PLK3_HUMAN Puromycin-sensitive aminopeptidase OS=Homo sapiens GN=NPEPPS PE=1 SV=1;>sp|P55786|PSA_HUMAN Puromycin-sensitive aminopeptidase OS=Homo sapiens GN=NPEPPS PE=1 SV=2	ENSG00000141279	ENSP00000320324;ENSP00000433287	E9PLK3_HUMAN;PSA_HUMAN	Not Sig	logFC < 2.0	UNCERTAIN
634	26.9154	27.1627	27.746	27.1438	28.2918	27.1257	27.1071	27.0155	NA	NA	NA	NA	NA	887	0.156264	0.711994	0.143091	0.0608592	E9PLL6;P46776;E9PJD9;E9PLX7;E9PKT2;H0YF34	E9PLL6;P46776;E9PJD9	60S ribosomal protein L27a	RPL27A	>tr|E9PLL6|E9PLL6_HUMAN 60S ribosomal protein L27a OS=Homo sapiens GN=RPL27A PE=1 SV=1;>sp|P46776|RL27A_HUMAN 60S ribosomal protein L27a OS=Homo sapiens GN=RPL27A PE=1 SV=2;>tr|E9PJD9|E9PJD9_HUMAN 60S ribosomal protein L27a OS=Homo sapiens GN=RPL27A PE=1 S	ENSG00000166441	ENSP00000346015;ENSP00000431565;ENSP00000431849;ENSP00000432671;ENSP00000433259;ENSP00000433766	E9PJD9_HUMAN;E9PLL6_HUMAN;RL27A_HUMAN	Not Sig	logFC < 2.0	UNCERTAIN
635	23.6729	22.9499	23.3391	23.0852	21.6309	22.8596	22.6763	22.9812	NA	NA	NA	NA	NA	888	1.0874	0.17744	-0.724761	-0.308799	E9PPJ5;E9PLM6;P21741	E9PPJ5;E9PLM6;P21741	Midkine	MDK	>tr|E9PPJ5|E9PPJ5_HUMAN Midkine (Fragment) OS=Homo sapiens GN=MDK PE=1 SV=1;>tr|E9PLM6|E9PLM6_HUMAN Midkine OS=Homo sapiens GN=MDK PE=1 SV=1;>sp|P21741|MK_HUMAN Midkine OS=Homo sapiens GN=MDK PE=1 SV=1	ENSG00000110492	ENSP00000352852;ENSP00000378932;ENSP00000378933;ENSP00000384034;ENSP00000384824;ENSP00000385451;ENSP00000432649;ENSP00000433240	E9PLM6_HUMAN;E9PPJ5_HUMAN;MK_HUMAN	Not Sig	logFC < 2.0	UNCERTAIN
636	25.2212	25.2169	25.0616	25.0743	24.5401	23.8993	23.748	23.5241	NA	NA	NA	NA	NA	892	2.80513	0.0357843	-1.21566	-0.546985	E9PM62;Q5T9L3;E9PKJ0;E9PJW4;E9PQK1;H0YCG9;Q7Z430;H0YDL2	E9PM62;Q5T9L3;E9PKJ0;E9PJW4;E9PQK1;H0YCG9	Protein wntless homolog	WLS	>tr|E9PM62|E9PM62_HUMAN Protein wntless homolog (Fragment) OS=Homo sapiens GN=WLS PE=1 SV=1;>sp|Q5T9L3|WLS_HUMAN Protein wntless homolog OS=Homo sapiens GN=WLS PE=1 SV=2;>tr|E9PKJ0|E9PKJ0_HUMAN Protein wntless homolog (Fragment) OS=Homo sapiens GN=WLS PE=1	ENSG00000116729	ENSP00000262348;ENSP00000346829;ENSP00000360012;ENSP00000360015;ENSP00000431552;ENSP00000433111;ENSP00000433690;ENSP00000436196	E9PJW4_HUMAN;E9PKJ0_HUMAN;E9PM62_HUMAN;E9PQK1_HUMAN;H0YCG9_HUMAN;WLS_HUMAN	Not Sig	logFC < 2.0	UNCERTAIN
637	25.1529	25.1158	24.9259	25.1734	24.2031	24.9182	25.2719	25.4806	NA	NA	NA	NA	NA	893	0.167069	0.740305	-0.12359	-0.0540659	E9PM92;O00193;E9PRZ9;E9PQA1	E9PM92;O00193;E9PRZ9	Small acidic protein	C11orf58;SMAP	>tr|E9PM92|E9PM92_HUMAN Small acidic protein OS=Homo sapiens GN=C11orf58 PE=1 SV=2;>sp|O00193|SMAP_HUMAN Small acidic protein OS=Homo sapiens GN=SMAP PE=1 SV=1;>tr|E9PRZ9|E9PRZ9_HUMAN Small acidic protein (Fragment) OS=Homo sapiens GN=C11orf58 PE=1 SV=1	ENSG00000110696	ENSP00000228136;ENSP00000431237;ENSP00000432207	E9PM92_HUMAN;E9PRZ9_HUMAN;SMAP_HUMAN	Not Sig	logFC < 2.0	UNCERTAIN
638	24.6926	24.8658	24.0349	24.6308	25.1095	25.1495	24.9562	25.0087	NA	NA	NA	NA	NA	894	1.44109	0.268206	0.499954	0.228697	E9PMI6;J3KN38;P54105;E9PJF4;E9PQ83	E9PMI6;J3KN38;P54105;E9PJF4	Methylosome subunit pICln	CLNS1A	>tr|E9PMI6|E9PMI6_HUMAN Methylosome subunit pICln OS=Homo sapiens GN=CLNS1A PE=1 SV=1;>tr|J3KN38|J3KN38_HUMAN Methylosome subunit pICln OS=Homo sapiens GN=CLNS1A PE=1 SV=1;>sp|P54105|ICLN_HUMAN Methylosome subunit pICln OS=Homo sapiens GN=CLNS1A PE=1 SV=1;	ENSG00000074201	ENSP00000263309;ENSP00000433741;ENSP00000433919;ENSP00000434311;ENSP00000434963	E9PJF4_HUMAN;E9PMI6_HUMAN;ICLN_HUMAN;J3KN38_HUMAN	Not Sig	logFC < 2.0	UNCERTAIN
639	23.1697	23.627	23.3491	23.4495	23.6947	23.7128	23.6456	23.6057	NA	NA	NA	NA	NA	895	1.44684	0.479361	0.265873	0.126691	E9PMJ2;J3KP39;Q9BPY3;G3V179;E9PIM5;E9PMW3	E9PMJ2;J3KP39;Q9BPY3;G3V179;E9PIM5	Protein FAM118B	FAM118B	>tr|E9PMJ2|E9PMJ2_HUMAN Protein FAM118B (Fragment) OS=Homo sapiens GN=FAM118B PE=1 SV=7;>tr|J3KP39|J3KP39_HUMAN Protein FAM118B OS=Homo sapiens GN=FAM118B PE=1 SV=1;>sp|Q9BPY3|F118B_HUMAN Protein FAM118B OS=Homo sapiens GN=FAM118B PE=1 SV=1;>tr|G3V179|G3V1	ENSG00000197798	ENSP00000353321;ENSP00000432712;ENSP00000433343;ENSP00000434952;ENSP00000435754	E9PIM5_HUMAN;E9PMJ2_HUMAN;F118B_HUMAN;G3V179_HUMAN;J3KP39_HUMAN	Not Sig	logFC < 2.0	UNCERTAIN
640	21.8775	21.8769	21.7598	21.9412	21.5606	21.6256	21.9468	21.9248	NA	NA	NA	NA	NA	896	0.411105	0.776033	-0.0993953	-0.0471777	E9PMQ6;Q00613	E9PMQ6;Q00613	Heat shock factor protein 1	HSF1	>tr|E9PMQ6|E9PMQ6_HUMAN Heat shock factor protein 1 OS=Homo sapiens GN=HSF1 PE=1 SV=2;>sp|Q00613|HSF1_HUMAN Heat shock factor protein 1 OS=Homo sapiens GN=HSF1 PE=1 SV=1	ENSG00000185122;ENSG00000261132	ENSP00000383590;ENSP00000431512;ENSP00000455432	E9PMQ6_HUMAN;HSF1_HUMAN	Not Sig	logFC < 2.0	UNCERTAIN
641	21.3696	21.4946	21.0611	20.8351	21.9472	20.9038	21.1759	20.8426	NA	NA	NA	NA	NA	898	0.0318523	0.954287	0.0272527	0.0118774	J3QKM0;E9PMX7;Q9P2N2	J3QKM0;E9PMX7;Q9P2N2	Rho GTPase-activating protein 28	ARHGAP28	>tr|J3QKM0|J3QKM0_HUMAN Rho GTPase-activating protein 28 (Fragment) OS=Homo sapiens GN=ARHGAP28 PE=4 SV=1;>tr|E9PMX7|E9PMX7_HUMAN Rho GTPase-activating protein 28 OS=Homo sapiens GN=ARHGAP28 PE=1 SV=1;>sp|Q9P2N2|RHG28_HUMAN Rho GTPase-activating protein 28	ENSG00000088756	ENSP00000262227;ENSP00000313506;ENSP00000372964;ENSP00000392660;ENSP00000435990;ENSP00000437262;ENSP00000463143	E9PMX7_HUMAN;J3QKM0_HUMAN;RHG28_HUMAN	Not Sig	logFC < 2.0	UNCERTAIN
642	20.7054	22.582	22.4754	22.5004	23.2557	23.1431	23.1819	23.43	NA	NA	NA	NA	NA	899	1.38426	0.0514308	1.18685	0.482762	H0YEF3;E9PN81;Q8TDP1;E9PKP0;H0YE52;H0YCP5	H0YEF3;E9PN81;Q8TDP1;E9PKP0;H0YE52;H0YCP5	Ribonuclease H2 subunit C	RNASEH2C	>tr|H0YEF3|H0YEF3_HUMAN Ribonuclease H2 subunit C (Fragment) OS=Homo sapiens GN=RNASEH2C PE=1 SV=1;>tr|E9PN81|E9PN81_HUMAN Ribonuclease H2 subunit C OS=Homo sapiens GN=RNASEH2C PE=1 SV=1;>sp|Q8TDP1|RNH2C_HUMAN Ribonuclease H2 subunit C OS=Homo sapiens GN=R	ENSG00000172922	ENSP00000308193;ENSP00000431555;ENSP00000432081;ENSP00000432897;ENSP00000434996;ENSP00000435717	E9PKP0_HUMAN;E9PN81_HUMAN;H0YCP5_HUMAN;H0YE52_HUMAN;H0YEF3_HUMAN;RNH2C_HUMAN	Not Sig	logFC < 2.0	UNCERTAIN
643	22.8056	22.8652	22.5952	22.8579	22.3888	22.6197	22.9011	23.012	NA	NA	NA	NA	NA	903	0.122517	0.889017	-0.0505652	-0.0234723	E9PNP3;Q9H7C9;E9PR47;E9PJP1;E9PLK9;K4DI89;E9PIQ4	E9PNP3;Q9H7C9;E9PR47;E9PJP1;E9PLK9;K4DI89	Mth938 domain-containing protein	AAMDC	>tr|E9PNP3|E9PNP3_HUMAN Mth938 domain-containing protein OS=Homo sapiens GN=AAMDC PE=1 SV=1;>sp|Q9H7C9|AAMDC_HUMAN Mth938 domain-containing protein OS=Homo sapiens GN=AAMDC PE=1 SV=1;>tr|E9PR47|E9PR47_HUMAN Mth938 domain-containing protein OS=Homo sapiens	ENSG00000087884	ENSP00000307254;ENSP00000377078;ENSP00000431808;ENSP00000432830;ENSP00000433281;ENSP00000433293;ENSP00000435560;ENSP00000436086	AAMDC_HUMAN;E9PJP1_HUMAN;E9PLK9_HUMAN;E9PNP3_HUMAN;E9PR47_HUMAN;K4DI89_HUMAN	Not Sig	logFC < 2.0	UNCERTAIN
[truncated: 3,161 more rows]
