# Supplementary material for: CD146-assisted isolation and multi-omics characterisation of human pluripotent stem cell derived cranial Schwann cell precursor-like cells.
Source: Research Square preprint supplement (doi:10.21203/rs.3.rs-3324198/v1), 2023-09-19
Supplement: Supplementary file 6 [file 410baec1af6819421c7e1596.xlsx]

## Sheet: Antibodies
Antibody	Concentration	Company	Catalog#	Application
MCAM-APC	0.736111	Miltenyi Biotec	130-097-942	FACS/ICC
MCAM-PE	0.736111	Miltenyi Biotec	130-097-939	FACS/ICC
ITGA6	0.736111	Thermo Fisher Scientific	PA5-12334	FACS
CDH6	0.736111	In vitro technologies	MAB2715-SP	FACS
SOX10	0.736111	R&D Systems	MAB2864	ICC/FC
SOX10	0.736111	Santa Cruz Biotechnology	SC-17342	ICC
p75	0.25	Millipore	AB1554	ICC
p75	0.736111	Miltenyi Biotech	130-098-111	FC
HNK-1	0.111111	DSHB	1C10	ICC/FC
TFAP2a	0.180556	DSHB	3B5	ICC
FOXD3	0.180556	Australian biosearch	#631701	ICC
CD29	0.180556	BD Pharmingen	#555442	FC
CD33	0.180556	Abcam	AB11032	FC
CD44	0.180556	R&D Systems	BBA10	FC
CD73	0.180556	Abcam	Ab54217	FC
CD90	0.180556	Santa Cruz Biotechnology	SC-9163	FC
CD105	0.180556	R&D Systems	AF1097	FC
HLA	0.180556	BD Biosciences	#555811	FC
Stro-1	0.180556	Chemicon International	MAB4315	FC
Peripherin	0.736111	Abcam	AB123576	ICC
?-III-Tubulin	0.180556	Synaptic systems	302304	ICC
GFAP	0.736111	Dako	Z033429-2	ICC
S100b	0.736111	Abcam	AB52642	ICC
Nanog	0.180556	Cell Signaling Technologies	#4903S	ICC
2004-10-01	0.180556	Millipore	MAB4401	ICC
TRA-1-60	0.180556	Millipore	MAB4360	ICC
Phospho-histone H3 (Ser10)	0.180556	Cell Signaling Technologies	#9708	ICC
BD MSC Kit	As per instructions	BD	#562245	FACS
