# Supplementary material for: CD146-assisted isolation and multi-omics characterisation of human pluripotent stem cell derived cranial Schwann cell precursor-like cells.
Source: Research Square preprint supplement (doi:10.21203/rs.3.rs-3324198/v1), 2023-09-19
Supplement: Supplementary file 7 [file 60935c6c43ea2c007d6eca3b.xlsx]

## Sheet: Bulk RNA-seq
Bulk RNA-seq Data
	logFC	AveExpr	t	P.Value	adj.P.Val	B	Entrez_ID	Symbol	Description	Chromosome	Start	End	Strand
ENSG00000079931	5.49417	5.94528	104.54	2.32e-30	4.4e-26	58.9449	26002	MOXD1	monooxygenase DBH like 1 [Source:HGNC Symbol;Acc:HGNC:21063]	6	132296055	132401545	-1
ENSG00000145794	3.72446	6.84247	99.3436	6.85e-30	4.84e-26	58.5348	84466	MEGF10	multiple EGF like domains 10 [Source:HGNC Symbol;Acc:HGNC:29634]	5	127290831	127465737	1
ENSG00000007237	3.92708	6.82807	98.8269	7.65e-30	4.84e-26	58.417	8522	GAS7	growth arrest specific 7 [Source:HGNC Symbol;Acc:HGNC:4169]	17	9910609	10198551	-1
ENSG00000279010	4.48844	7.10047	97.1482	1.1e-29	5.22e-26	58.0854	100616146 102465492	MIR4534	microRNA 4534 [Source:HGNC Symbol;Acc:HGNC:41692]	22	37948352	38002889	1
ENSG00000148848	5.7831	5.93577	95.6077	1.55e-29	5.87e-26	57.2111	8038	ADAM12	ADAM metallopeptidase domain 12 [Source:HGNC Symbol;Acc:HGNC:190]	10	126012381	126388455	-1
ENSG00000075223	4.03146	7.25078	90.5547	4.9e-29	1.55e-25	56.6906	10512	SEMA3C	semaphorin 3C [Source:HGNC Symbol;Acc:HGNC:10725]	7	80742538	80922359	-1
ENSG00000272841	3.61156	5.70403	86.4952	1.3e-28	3.08e-25	55.5353		RP3-428L16.2		6	160990318	160992342	-1
ENSG00000081479	6.77983	6.17395	86.9113	1.17e-28	3.08e-25	55.3104	4036	LRP2	LDL receptor related protein 2 [Source:HGNC Symbol;Acc:HGNC:6694]	2	169127109	169362685	-1
ENSG00000151892	5.7212	5.97339	82.3881	3.65e-28	7.69e-25	54.3949	2674	GFRA1	GDNF family receptor alpha 1 [Source:HGNC Symbol;Acc:HGNC:4243]	10	116056925	116273467	-1
ENSG00000048740	3.19153	6.56961	80.641	5.75e-28	1.09e-24	54.2679	10659	CELF2	CUGBP, Elav-like family member 2 [Source:HGNC Symbol;Acc:HGNC:2550]	10	10798397	11336675	1
ENSG00000169554	3.05781	7.87415	76.7989	1.62e-27	2.8e-24	53.2854	9839	ZEB2	zinc finger E-box binding homeobox 2 [Source:HGNC Symbol;Acc:HGNC:14881]	2	144384081	144524583	-1
ENSG00000164733	-3.25246	8.20167	-74.2885	3.28e-27	3.89e-24	52.5815	1508	CTSB	cathepsin B [Source:HGNC Symbol;Acc:HGNC:2527]	8	11842524	11869448	-1
ENSG00000154856	-4.09733	6.72995	-74.5717	3.03e-27	3.88e-24	52.5749	147495	APCDD1	APC down-regulated 1 [Source:HGNC Symbol;Acc:HGNC:15718]	18	10454628	10489948	1
ENSG00000106546	6.67366	5.19434	75.6488	2.23e-27	3.26e-24	52.1194	196	AHR	aryl hydrocarbon receptor [Source:HGNC Symbol;Acc:HGNC:348]	7	17298622	17346152	1
ENSG00000164125	6.39497	4.86322	76.345	1.84e-27	2.91e-24	52.1159	51313	FAM198B	family with sequence similarity 198 member B [Source:HGNC Symbol;Acc:HGNC:25312]	4	158124474	158173318	-1
ENSG00000111961	2.48806	6.98818	70.2809	1.06e-26	1.02e-23	51.4062	23328	SASH1	SAM and SH3 domain containing 1 [Source:HGNC Symbol;Acc:HGNC:19182]	6	148272304	148552050	1
ENSG00000091409	2.88556	6.87224	70.0728	1.13e-26	1.02e-23	51.3424	3655	ITGA6	integrin subunit alpha 6 [Source:HGNC Symbol;Acc:HGNC:6142]	2	172427354	172506282	1
ENSG00000149177	4.13527	5.47465	70.2536	1.07e-26	1.02e-23	51.257	5795	PTPRJ	protein tyrosine phosphatase, receptor type J [Source:HGNC Symbol;Acc:HGNC:9673]	11	47980558	48170841	1
ENSG00000079215	-5.28904	6.07102	-70.7125	9.34e-27	9.85e-24	51.194	6507	SLC1A3	solute carrier family 1 member 3 [Source:HGNC Symbol;Acc:HGNC:10941]	5	36606355	36688334	1
ENSG00000158887	6.84441	4.19169	74.5234	3.07e-27	3.88e-24	50.7524	4359	MPZ	myelin protein zero [Source:HGNC Symbol;Acc:HGNC:7225]	1	161304735	161309972	-1
ENSG00000144355	6.84169	4.51696	72.0942	6.2e-27	6.92e-24	50.5825	1745	DLX1	distal-less homeobox 1 [Source:HGNC Symbol;Acc:HGNC:2914]	2	172084740	172089677	1
ENSG00000137460	4.71215	5.47436	67.7716	2.3e-26	1.98e-23	50.4814	85462	FHDC1	FH2 domain containing 1 [Source:HGNC Symbol;Acc:HGNC:29363]	4	152936352	152979696	1
ENSG00000196376	2.76803	6.31668	65.9821	4.06e-26	3.35e-23	50.0671	222553	SLC35F1	solute carrier family 35 member F1 [Source:HGNC Symbol;Acc:HGNC:21483]	6	117907526	118317676	1
ENSG00000018408	2.37838	6.53358	63.9212	7.95e-26	5.59e-23	49.3957	25937	WWTR1	WW domain containing transcription regulator 1 [Source:HGNC Symbol;Acc:HGNC:24042]	3	149517235	149736714	-1
ENSG00000153707	-4.06272	5.33327	-64.6437	6.26e-26	4.95e-23	49.3825	5789	PTPRD	protein tyrosine phosphatase, receptor type D [Source:HGNC Symbol;Acc:HGNC:9668]	9	8314246	10612723	-1
ENSG00000163513	2.95821	5.7528	63.2666	9.88e-26	6.7e-23	49.1686	7048	TGFBR2	transforming growth factor beta receptor 2 [Source:HGNC Symbol;Acc:HGNC:11773]	3	30606502	30694142	1
ENSG00000147257	-4.82561	5.1823	-64.0301	7.67e-26	5.59e-23	48.9739	2719	GPC3	glypican 3 [Source:HGNC Symbol;Acc:HGNC:4451]	X	133535745	133985895	-1
ENSG00000096696	-5.33247	5.44485	-64.0118	7.71e-26	5.59e-23	48.967	1832	DSP	desmoplakin [Source:HGNC Symbol;Acc:HGNC:3052]	6	7541575	7586717	1
ENSG00000136160	4.23548	5.54032	60.7077	2.37e-25	1.49e-22	48.2641	1910	EDNRB	endothelin receptor type B [Source:HGNC Symbol;Acc:HGNC:3180]	13	77895481	77919768	-1
ENSG00000064309	-2.42219	6.20202	-60.5497	2.5e-25	1.49e-22	48.2486	50937	CDON	cell adhesion associated, oncogene regulated [Source:HGNC Symbol;Acc:HGNC:17104]	11	125955796	126063335	-1
ENSG00000106484	-2.26825	7.29447	-60.5781	2.48e-25	1.49e-22	48.2454	4232	MEST	mesoderm specific transcript [Source:HGNC Symbol;Acc:HGNC:7028]	7	130486171	130506296	1
ENSG00000065361	2.91929	7.73182	60.0677	2.97e-25	1.71e-22	48.0488	2065	ERBB3	erb-b2 receptor tyrosine kinase 3 [Source:HGNC Symbol;Acc:HGNC:3431]	12	56079857	56103505	1
ENSG00000125848	2.59293	6.23164	59.6639	3.42e-25	1.91e-22	47.9347	23767	FLRT3	fibronectin leucine rich transmembrane protein 3 [Source:HGNC Symbol;Acc:HGNC:3762]	20	14322988	14337616	-1
ENSG00000172164	5.20014	4.1115	61.2245	1.98e-25	1.3e-22	47.87	6641	SNTB1	syntrophin beta 1 [Source:HGNC Symbol;Acc:HGNC:11168]	8	120535745	120813273	-1
ENSG00000138434	2.31848	7.973	59.3086	3.88e-25	2.11e-22	47.7693	6744	SSFA2	sperm specific antigen 2 [Source:HGNC Symbol;Acc:HGNC:11319]	2	181891833	181930738	1
ENSG00000102024	2.2418	8.54479	59.0684	4.23e-25	2.23e-22	47.6712	5358	PLS3	plastin 3 [Source:HGNC Symbol;Acc:HGNC:9091]	X	115561174	115650861	1
ENSG00000143013	2.13226	6.48729	58.9193	4.46e-25	2.29e-22	47.6601	8543	LMO4	LIM domain only 4 [Source:HGNC Symbol;Acc:HGNC:6644]	1	87328468	87348923	1
ENSG00000018625	-2.5209	7.66003	-58.568	5.07e-25	2.53e-22	47.5163	477	ATP1A2	ATPase Na+/K+ transporting subunit alpha 2 [Source:HGNC Symbol;Acc:HGNC:800]	1	160115759	160143591	1
ENSG00000076641	4.11008	5.86774	57.9519	6.34e-25	3.08e-22	47.3167	55824	PAG1	phosphoprotein membrane anchor with glycosphingolipid microdomains 1 [Source:HGNC Symbol;Acc:HGNC:30043]	8	80967810	81112068	-1
ENSG00000169851	-4.09707	5.93736	-57.6907	6.97e-25	3.23e-22	47.1861	5099	PCDH7	protocadherin 7 [Source:HGNC Symbol;Acc:HGNC:8659]	4	30720415	31146805	1
ENSG00000123560	2.12321	7.79759	57.7047	6.94e-25	3.23e-22	47.1825	5354	PLP1	proteolipid protein 1 [Source:HGNC Symbol;Acc:HGNC:9086]	X	103773718	103792619	1
ENSG00000197747	3.04459	5.19959	55.9719	1.32e-24	5.58e-22	46.5779	6281	S100A10	S100 calcium binding protein A10 [Source:HGNC Symbol;Acc:HGNC:10487]	1	151982915	151994390	-1
ENSG00000102935	-3.21054	5.54469	-55.8854	1.37e-24	5.64e-22	46.5294	23090	ZNF423	zinc finger protein 423 [Source:HGNC Symbol;Acc:HGNC:16762]	16	49487524	49857919	-1
ENSG00000283321	6.65159	4.39059	57.5742	7.28e-25	3.29e-22	46.4908		RP11-507K12.1		7	17299295	17467234	1
ENSG00000184564	8.10375	5.07274	57.2288	8.27e-25	3.65e-22	46.4082	84189	SLITRK6	SLIT and NTRK like family member 6 [Source:HGNC Symbol;Acc:HGNC:23503]	13	85792790	85799488	-1
ENSG00000277586	-4.12157	5.56788	-55.6188	1.51e-24	6.11e-22	46.3849	4747	NEFL	neurofilament, light polypeptide [Source:HGNC Symbol;Acc:HGNC:7739]	8	24950955	24957110	-1
ENSG00000111371	-2.16797	7.35725	-55.3616	1.67e-24	6.6e-22	46.3124	81539	SLC38A1	solute carrier family 38 member 1 [Source:HGNC Symbol;Acc:HGNC:13447]	12	46183063	46270017	-1
ENSG00000132854	4.31414	5.00999	54.8236	2.05e-24	7.78e-22	46.0955	163782	KANK4	KN motif and ankyrin repeat domains 4 [Source:HGNC Symbol;Acc:HGNC:27263]	1	62236979	62319414	-1
ENSG00000242265	-1.74317	8.73241	-54.7027	2.15e-24	8e-22	46.0168	23089	PEG10	paternally expressed 10 [Source:HGNC Symbol;Acc:HGNC:14005]	7	94656325	94669695	1
ENSG00000165912	3.90338	3.81589	55.2256	1.76e-24	6.81e-22	45.9957	29763	PACSIN3	protein kinase C and casein kinase substrate in neurons 3 [Source:HGNC Symbol;Acc:HGNC:8572]	11	47177525	47186443	-1
ENSG00000150244	6.66774	5.54076	54.4536	2.37e-24	8.64e-22	45.8816	79097	TRIM48	tripartite motif containing 48 [Source:HGNC Symbol;Acc:HGNC:19021]	11	55262182	55271119	1
ENSG00000178695	3.41204	4.72545	54.1176	2.7e-24	9.66e-22	45.8349	115207	KCTD12	potassium channel tetramerization domain containing 12 [Source:HGNC Symbol;Acc:HGNC:14678]	13	76880166	76886390	-1
ENSG00000184613	-3.93617	5.47261	-54.0164	2.81e-24	9.68e-22	45.7827	4753	NELL2	neural EGFL like 2 [Source:HGNC Symbol;Acc:HGNC:7751]	12	44508275	44921848	-1
ENSG00000104368	2.04913	7.312	54.0324	2.79e-24	9.68e-22	45.7782	5327	PLAT	plasminogen activator, tissue type [Source:HGNC Symbol;Acc:HGNC:9051]	8	42175233	42207724	-1
ENSG00000046653	2.31821	5.93677	53.6824	3.2e-24	1.08e-21	45.6886	2824	GPM6B	glycoprotein M6B [Source:HGNC Symbol;Acc:HGNC:4461]	X	13771031	13938638	-1
ENSG00000113389	7.63776	4.04981	56.9145	9.29e-25	4.01e-22	45.6474	4883	NPR3	natriuretic peptide receptor 3 [Source:HGNC Symbol;Acc:HGNC:7945]	5	32689070	32791724	1
ENSG00000077782	-2.04361	6.4024	-53.2563	3.79e-24	1.24e-21	45.5132	2260	FGFR1	fibroblast growth factor receptor 1 [Source:HGNC Symbol;Acc:HGNC:3688]	8	38411138	38468834	-1
ENSG00000100078	-2.7864	5.23827	-52.6706	4.79e-24	1.49e-21	45.2875	50487	PLA2G3	phospholipase A2 group III [Source:HGNC Symbol;Acc:HGNC:17934]	22	31134809	31140607	-1
ENSG00000128872	4.03161	4.04828	52.9438	4.29e-24	1.38e-21	45.2196	29767	TMOD2	tropomodulin 2 [Source:HGNC Symbol;Acc:HGNC:11872]	15	51751561	51816368	1
ENSG00000143653	2.06523	6.32709	52.2759	5.61e-24	1.72e-21	45.1029	51097	SCCPDH	saccharopine dehydrogenase (putative) [Source:HGNC Symbol;Acc:HGNC:24275]	1	246724047	246768137	1
ENSG00000100146	7.83614	4.61899	53.6333	3.26e-24	1.09e-21	44.9761	6663	SOX10	SRY-box 10 [Source:HGNC Symbol;Acc:HGNC:11190]	22	37970686	37987422	-1
ENSG00000139289	2.61556	5.83878	51.7328	7e-24	2.04e-21	44.9054	22822	PHLDA1	pleckstrin homology like domain family A member 1 [Source:HGNC Symbol;Acc:HGNC:8933]	12	76025447	76033932	-1
ENSG00000150893	2.27631	7.61518	51.7505	6.95e-24	2.04e-21	44.8388	341640	FREM2	FRAS1 related extracellular matrix protein 2 [Source:HGNC Symbol;Acc:HGNC:25396]	13	38687129	38887131	1
ENSG00000111728	3.1877	5.31912	51.2375	8.57e-24	2.46e-21	44.7183	6489	ST8SIA1	ST8 alpha-N-acetyl-neuraminide alpha-2,8-sialyltransferase 1 [Source:HGNC Symbol;Acc:HGNC:10869]	12	22063773	22437041	-1
ENSG00000196569	-4.89539	4.47006	-52.145	5.92e-24	1.78e-21	44.6388	3908	LAMA2	laminin subunit alpha 2 [Source:HGNC Symbol;Acc:HGNC:6482]	6	128883141	129516569	1
ENSG00000166250	-4.66819	5.09379	-51.0914	9.11e-24	2.58e-21	44.5098	79827	CLMP	CXADR like membrane protein [Source:HGNC Symbol;Acc:HGNC:24039]	11	123069865	123195281	-1
ENSG00000121440	2.94135	5.09248	50.7023	1.07e-23	2.99e-21	44.4967	23024	PDZRN3	PDZ domain containing ring finger 3 [Source:HGNC Symbol;Acc:HGNC:17704]	3	73382433	73624940	-1
ENSG00000144645	3.31239	4.93958	50.0953	1.38e-23	3.75e-21	44.2394	114884	OSBPL10	oxysterol binding protein like 10 [Source:HGNC Symbol;Acc:HGNC:16395]	3	31657890	32077580	-1
ENSG00000182985	1.75088	7.09398	50.0925	1.38e-23	3.75e-21	44.1513	23705	CADM1	cell adhesion molecule 1 [Source:HGNC Symbol;Acc:HGNC:5951]	11	115169218	115504957	-1
ENSG00000112531	1.57211	8.35519	49.9802	1.45e-23	3.87e-21	44.0641	9444	QKI	QKI, KH domain containing RNA binding [Source:HGNC Symbol;Acc:HGNC:21100]	6	163414000	163578596	1
ENSG00000143344	2.09295	6.01589	49.6056	1.7e-23	4.42e-21	43.992	23179	RGL1	ral guanine nucleotide dissociation stimulator like 1 [Source:HGNC Symbol;Acc:HGNC:30281]	1	183636085	183928531	1
ENSG00000076706	4.98312	4.73421	49.6581	1.66e-23	4.38e-21	43.9847	4162 102465453	MCAM	melanoma cell adhesion molecule [Source:HGNC Symbol;Acc:HGNC:6934]	11	119308529	119321521	-1
ENSG00000188906	6.45033	3.16988	52.7022	4.72e-24	1.49e-21	43.9599	120892	LRRK2	leucine rich repeat kinase 2 [Source:HGNC Symbol;Acc:HGNC:18618]	12	40196744	40369285	1
ENSG00000196628	-1.83122	6.20102	-49.2548	1.97e-23	5.06e-21	43.8452	6925	TCF4	transcription factor 4 [Source:HGNC Symbol;Acc:HGNC:11634]	18	55222198	55664787	-1
ENSG00000115963	3.13212	5.62411	48.8951	2.3e-23	5.75e-21	43.7171	390	RND3	Rho family GTPase 3 [Source:HGNC Symbol;Acc:HGNC:671]	2	150468195	150539011	-1
ENSG00000154639	-4.63644	4.33161	-48.9333	2.27e-23	5.73e-21	43.403	1525	CXADR	coxsackie virus and adenovirus receptor [Source:HGNC Symbol;Acc:HGNC:2559]	21	17512382	17593579	1
ENSG00000144724	-2.4238	6.6743	-48.167	3.16e-23	7.69e-21	43.3528	5793	PTPRG	protein tyrosine phosphatase, receptor type G [Source:HGNC Symbol;Acc:HGNC:9671]	3	61561569	62297613	1
ENSG00000182871	-4.38561	4.88834	-48.272	3.02e-23	7.44e-21	43.3482	80781	COL18A1	collagen type XVIII alpha 1 chain [Source:HGNC Symbol;Acc:HGNC:2195]	21	45405137	45513720	1
ENSG00000160307	3.87019	4.62216	47.7428	3.81e-23	9.16e-21	43.21	6285	S100B	S100 calcium binding protein B [Source:HGNC Symbol;Acc:HGNC:10500]	21	46598962	46605208	-1
ENSG00000133059	1.92106	6.06248	47.6527	3.97e-23	9.41e-21	43.1243	25778	DSTYK	dual serine/threonine and tyrosine protein kinase [Source:HGNC Symbol;Acc:HGNC:29043]	1	205142505	205211566	-1
ENSG00000139926	2.24911	7.53317	47.1139	5.04e-23	1.18e-20	42.8114	122786	FRMD6	FERM domain containing 6 [Source:HGNC Symbol;Acc:HGNC:19839]	14	51489100	51730727	1
ENSG00000172201	2.6422	5.81334	46.8405	5.7e-23	1.29e-20	42.7814	3400	ID4	inhibitor of DNA binding 4, HLH protein [Source:HGNC Symbol;Acc:HGNC:5363]	6	19837386	19840684	1
ENSG00000164318	1.6595	7.00412	46.9829	5.35e-23	1.24e-20	42.7699	133584	EGFLAM	EGF like, fibronectin type III and laminin G domains [Source:HGNC Symbol;Acc:HGNC:26810]	5	38258409	38465021	1
ENSG00000105767	1.88491	6.37792	46.8633	5.64e-23	1.29e-20	42.7468	199731	CADM4	cell adhesion molecule 4 [Source:HGNC Symbol;Acc:HGNC:30825]	19	43622368	43639839	-1
ENSG00000169439	-2.64517	6.57509	-46.6316	6.27e-23	1.37e-20	42.6679	6383	SDC2	syndecan 2 [Source:HGNC Symbol;Acc:HGNC:10659]	8	96493351	96611780	1
ENSG00000185565	1.77508	6.42653	46.6704	6.16e-23	1.37e-20	42.654	4045	LSAMP	limbic system-associated membrane protein [Source:HGNC Symbol;Acc:HGNC:6705]	3	115802363	117139389	-1
ENSG00000113361	3.49236	8.06124	46.6393	6.24e-23	1.37e-20	42.5798	1004	CDH6	cadherin 6 [Source:HGNC Symbol;Acc:HGNC:1765]	5	31193750	31329146	1
ENSG00000140807	-3.46551	6.8229	-45.9288	8.63e-23	1.84e-20	42.3489	85407	NKD1	naked cuticle homolog 1 [Source:HGNC Symbol;Acc:HGNC:17045]	16	50548330	50649249	1
ENSG00000135903	-2.88769	5.07963	-45.7453	9.39e-23	1.97e-20	42.3262	5077	PAX3	paired box 3 [Source:HGNC Symbol;Acc:HGNC:8617]	2	222199888	222298996	-1
ENSG00000171617	1.68959	8.28776	46.0356	8.22e-23	1.77e-20	42.284	8507	ENC1	ectodermal-neural cortex 1 [Source:HGNC Symbol;Acc:HGNC:3345]	5	74627406	74641424	-1
ENSG00000133121	2.64283	5.5455	45.7274	9.47e-23	1.97e-20	42.2822	90627	STARD13	StAR related lipid transfer domain containing 13 [Source:HGNC Symbol;Acc:HGNC:19164]	13	33103135	33350630	-1
ENSG00000103449	-3.78098	5.0433	-45.6462	9.83e-23	1.98e-20	42.262	6299	SALL1	spalt like transcription factor 1 [Source:HGNC Symbol;Acc:HGNC:10524]	16	51135975	51151367	-1
ENSG00000146376	2.96644	4.34479	45.4606	1.07e-22	2.14e-20	42.1902	93663	ARHGAP18	Rho GTPase activating protein 18 [Source:HGNC Symbol;Acc:HGNC:21035]	6	129576132	129710225	-1
ENSG00000154654	3.90864	3.56589	45.6875	9.64e-23	1.97e-20	42.1401	4685	NCAM2	neural cell adhesion molecule 2 [Source:HGNC Symbol;Acc:HGNC:7657]	21	20998315	21543329	1
ENSG00000164161	-3.25858	4.77671	-45.1161	1.26e-22	2.49e-20	42.0187	64399	HHIP	hedgehog interacting protein [Source:HGNC Symbol;Acc:HGNC:14866]	4	144646021	144745271	1
ENSG00000168000	-2.13989	5.69719	-45.0705	1.28e-22	2.49e-20	41.9794	26580	BSCL2	BSCL2, seipin lipid droplet biogenesis associated [Source:HGNC Symbol;Acc:HGNC:15832]	11	62690275	62709845	-1
ENSG00000238057	3.47156	4.05864	45.0462	1.3e-22	2.49e-20	41.9691	100303491	ZEB2-AS1	ZEB2 antisense RNA 1 [Source:HGNC Symbol;Acc:HGNC:37149]	2	144518097	144521477	1
ENSG00000270823	-2.31601	4.75221	-44.7892	1.47e-22	2.75e-20	41.8814		RP11-2E11.6		7	130495794	130498427	-1
ENSG00000134954	1.60864	7.17414	45.0513	1.3e-22	2.49e-20	41.8544	2113	ETS1	ETS proto-oncogene 1, transcription factor [Source:HGNC Symbol;Acc:HGNC:3488]	11	128458761	128587558	-1
ENSG00000197321	2.06889	6.66866	44.3966	1.76e-22	3.25e-20	41.5654	6840	SVIL	supervillin [Source:HGNC Symbol;Acc:HGNC:11480]	10	29457338	29736781	-1
ENSG00000065320	4.13371	3.14209	44.742	1.5e-22	2.79e-20	41.557	9423	NTN1	netrin 1 [Source:HGNC Symbol;Acc:HGNC:8029]	17	9021542	9244000	1
ENSG00000145390	2.97407	5.14633	44.0063	2.13e-22	3.81e-20	41.4919	54532	USP53	ubiquitin specific peptidase 53 [Source:HGNC Symbol;Acc:HGNC:29255]	4	119212587	119295517	1
ENSG00000118777	4.52074	2.95497	44.8751	1.41e-22	2.67e-20	41.4618	9429	ABCG2	ATP binding cassette subfamily G member 2 (Junior blood group) [Source:HGNC Symbol;Acc:HGNC:74]	4	88090264	88231322	-1
ENSG00000115525	2.93878	4.19434	43.8574	2.28e-22	4.01e-20	41.4343	8869	ST3GAL5	ST3 beta-galactoside alpha-2,3-sialyltransferase 5 [Source:HGNC Symbol;Acc:HGNC:10872]	2	85839144	85889014	-1
ENSG00000164692	-4.29917	4.68574	-43.9399	2.19e-22	3.89e-20	41.4029	1278	COL1A2	collagen type I alpha 2 chain [Source:HGNC Symbol;Acc:HGNC:2198]	7	94394561	94431232	1
ENSG00000083857	-1.60322	8.51402	-44.0315	2.1e-22	3.8e-20	41.3211	2195	FAT1	FAT atypical cadherin 1 [Source:HGNC Symbol;Acc:HGNC:3595]	4	186587783	186726722	-1
ENSG00000141639	-4.32679	4.64604	-43.7699	2.38e-22	4.15e-20	41.315	5596	MAPK4	mitogen-activated protein kinase 4 [Source:HGNC Symbol;Acc:HGNC:6878]	18	50560078	50731824	1
ENSG00000186469	1.71376	6.91936	43.6222	2.56e-22	4.37e-20	41.1685	54331	GNG2	G protein subunit gamma 2 [Source:HGNC Symbol;Acc:HGNC:4404]	14	51826195	51979342	1
ENSG00000081189	2.2496	5.79685	43.2547	3.06e-22	5.09e-20	41.064	4208	MEF2C	myocyte enhancer factor 2C [Source:HGNC Symbol;Acc:HGNC:6996]	5	88717117	88904257	-1
ENSG00000083444	-2.19898	5.47269	-42.9851	3.49e-22	5.75e-20	40.9828	5351	PLOD1	procollagen-lysine,2-oxoglutarate 5-dioxygenase 1 [Source:HGNC Symbol;Acc:HGNC:9081]	1	11934205	11975538	1
ENSG00000087495	2.16099	5.20512	42.8822	3.67e-22	5.95e-20	40.9199	116154	PHACTR3	phosphatase and actin regulator 3 [Source:HGNC Symbol;Acc:HGNC:15833]	20	59577509	59847711	1
ENSG00000116106	-5.68849	4.43529	-43.4821	2.74e-22	4.64e-20	40.904	2043	EPHA4	EPH receptor A4 [Source:HGNC Symbol;Acc:HGNC:3388]	2	221418027	221574202	-1
ENSG00000182168	-2.731	5.47646	-42.7435	3.93e-22	6.21e-20	40.877	8633	UNC5C	unc-5 netrin receptor C [Source:HGNC Symbol;Acc:HGNC:12569]	4	95162504	95549206	-1
ENSG00000119280	1.80125	6.52134	42.9491	3.55e-22	5.81e-20	40.8545	84886	C1orf198	chromosome 1 open reading frame 198 [Source:HGNC Symbol;Acc:HGNC:25900]	1	230837119	230869589	-1
ENSG00000138448	1.61382	7.90994	42.7832	3.85e-22	6.14e-20	40.7069	3685	ITGAV	integrin subunit alpha V [Source:HGNC Symbol;Acc:HGNC:6150]	2	186590065	186680901	1
ENSG00000157240	2.15903	5.18213	42.2363	5.05e-22	7.79e-20	40.5966	8321	FZD1	frizzled class receptor 1 [Source:HGNC Symbol;Acc:HGNC:4038]	7	91264364	91271326	1
ENSG00000149633	3.59047	3.2829	42.373	4.72e-22	7.34e-20	40.5816	85449	KIAA1755	KIAA1755 [Source:HGNC Symbol;Acc:HGNC:29372]	20	38210488	38260772	-1
ENSG00000143171	6.77431	3.0148	44.0432	2.09e-22	3.8e-20	40.5451	6258	RXRG	retinoid X receptor gamma [Source:HGNC Symbol;Acc:HGNC:10479]	1	165400917	165445355	-1
ENSG00000173786	1.71328	8.09644	42.4143	4.62e-22	7.25e-20	40.5125	1267	CNP	2',3'-cyclic nucleotide 3' phosphodiesterase [Source:HGNC Symbol;Acc:HGNC:2158]	17	41966741	41977731	1
ENSG00000154678	7.39742	2.56088	45.7091	9.55e-23	1.97e-20	40.4988	5137	PDE1C	phosphodiesterase 1C [Source:HGNC Symbol;Acc:HGNC:8776]	7	31751179	32299329	-1
ENSG00000140937	-8.35465	5.54543	-42.8347	3.75e-22	6.04e-20	40.4609	1009	CDH11	cadherin 11 [Source:HGNC Symbol;Acc:HGNC:1750]	16	64943753	65126112	-1
ENSG00000151458	1.55484	6.67503	42.1304	5.32e-22	8.15e-20	40.4271	57182	ANKRD50	ankyrin repeat domain 50 [Source:HGNC Symbol;Acc:HGNC:29223]	4	124664052	124712732	-1
ENSG00000165300	-2.4559	4.6697	-41.7029	6.6e-22	9.94e-20	40.3788	26050	SLITRK5	SLIT and NTRK like family member 5 [Source:HGNC Symbol;Acc:HGNC:20295]	13	87672615	87696272	1
ENSG00000106780	1.77869	5.64751	41.6647	6.73e-22	9.97e-20	40.2599	1955	MEGF9	multiple EGF like domains 9 [Source:HGNC Symbol;Acc:HGNC:3234]	9	120600813	120714470	-1
ENSG00000120875	3.4401	7.32608	41.7859	6.33e-22	9.6e-20	40.2337	1846	DUSP4	dual specificity phosphatase 4 [Source:HGNC Symbol;Acc:HGNC:3070]	8	29333064	29350668	-1
ENSG00000188517	4.19187	3.09641	41.68	6.67e-22	9.97e-20	40.1345	84570	COL25A1	collagen type XXV alpha 1 chain [Source:HGNC Symbol;Acc:HGNC:18603]	4	108810721	109302657	-1
ENSG00000122042	1.62828	6.93943	41.5416	7.16e-22	1.05e-19	40.109	5412	UBL3	ubiquitin like 3 [Source:HGNC Symbol;Acc:HGNC:12504]	13	29764371	29850684	-1
ENSG00000010319	6.57544	2.5185	43.7108	2.45e-22	4.23e-20	40.0662	56920	SEMA3G	semaphorin 3G [Source:HGNC Symbol;Acc:HGNC:30400]	3	52433053	52445085	-1
ENSG00000091972	1.70733	5.4109	41.1852	8.58e-22	1.24e-19	40.0288	4345	CD200	CD200 molecule [Source:HGNC Symbol;Acc:HGNC:7203]	3	112332347	112362812	1
ENSG00000118689	1.81612	5.0833	40.7956	1.05e-21	1.5e-19	39.8543	2309	FOXO3	forkhead box O3 [Source:HGNC Symbol;Acc:HGNC:3821]	6	108559835	108684774	1
ENSG00000275700	2.0449	6.73595	40.6382	1.14e-21	1.6e-19	39.6478	26574	AATF	apoptosis antagonizing transcription factor [Source:HGNC Symbol;Acc:HGNC:19235]	17	36948875	37056871	1
ENSG00000163947	2.63011	3.99192	40.1274	1.48e-21	2.07e-19	39.5698	50650	ARHGEF3	Rho guanine nucleotide exchange factor 3 [Source:HGNC Symbol;Acc:HGNC:683]	3	56727418	57079329	-1
ENSG00000137267	-2.06679	4.94616	-40.0442	1.55e-21	2.11e-19	39.5027	7280	TUBB2A	tubulin beta 2A class IIa [Source:HGNC Symbol;Acc:HGNC:12412]	6	3153669	3157526	-1
ENSG00000178538	2.86292	4.04812	39.9345	1.64e-21	2.19e-19	39.4685	767	CA8	carbonic anhydrase 8 [Source:HGNC Symbol;Acc:HGNC:1382]	8	60187347	60281412	-1
ENSG00000183579	-2.27965	5.26999	-39.9371	1.64e-21	2.19e-19	39.4291	84133	ZNRF3	zinc and ring finger 3 [Source:HGNC Symbol;Acc:HGNC:18126]	22	28883592	29057487	1
ENSG00000162878	-4.08497	5.99712	-39.911	1.66e-21	2.21e-19	39.4249	91461	PKDCC	protein kinase domain containing, cytoplasmic [Source:HGNC Symbol;Acc:HGNC:25123]	2	42048020	42058528	1
ENSG00000188487	5.0751	2.75782	40.7843	1.05e-21	1.5e-19	39.4201	387755	INSC	inscuteable homolog (Drosophila) [Source:HGNC Symbol;Acc:HGNC:33116]	11	15112424	15247208	1
ENSG00000139354	1.54393	6.18485	40.1158	1.49e-21	2.07e-19	39.3981	283431	GAS2L3	growth arrest specific 2 like 3 [Source:HGNC Symbol;Acc:HGNC:27475]	12	100573683	100628286	1
ENSG00000182263	1.78841	6.10674	40.0312	1.56e-21	2.11e-19	39.362	55137	FIGN	fidgetin, microtubule severing factor [Source:HGNC Symbol;Acc:HGNC:13285]	2	163593396	163736012	-1
ENSG00000248429	6.31632	2.78415	41.3087	8.06e-22	1.18e-19	39.3618		RP11-597D13.9		4	158170752	158202877	1
ENSG00000128710	-5.84662	3.8277	-40.7679	1.06e-21	1.51e-19	39.317	3236	HOXD10	homeobox D10 [Source:HGNC Symbol;Acc:HGNC:5133]	2	176108790	176119942	1
ENSG00000101144	-4.44744	3.70671	-40.0553	1.54e-21	2.11e-19	39.2658	655	BMP7	bone morphogenetic protein 7 [Source:HGNC Symbol;Acc:HGNC:1074]	20	57168748	57266629	-1
ENSG00000115232	1.97183	7.08078	39.8702	1.7e-21	2.24e-19	39.2142	3676	ITGA4	integrin subunit alpha 4 [Source:HGNC Symbol;Acc:HGNC:6140]	2	181457202	181536187	1
ENSG00000171604	-2.72919	5.22998	-39.4932	2.07e-21	2.64e-19	39.2083	51523	CXXC5	CXXC finger protein 5 [Source:HGNC Symbol;Acc:HGNC:26943]	5	139647299	139683882	1
ENSG00000034053	1.59865	6.93318	39.7846	1.78e-21	2.33e-19	39.1731	321	APBA2	amyloid beta precursor protein binding family A member 2 [Source:HGNC Symbol;Acc:HGNC:579]	15	28884483	29118315	1
ENSG00000138759	-3.04149	4.7718	-39.3709	2.21e-21	2.78e-19	39.1691	80144	FRAS1	Fraser extracellular matrix complex subunit 1 [Source:HGNC Symbol;Acc:HGNC:19185]	4	78057570	78544269	1
ENSG00000141441	2.44213	4.12564	39.3017	2.3e-21	2.85e-19	39.1299	64762	GAREM1	GRB2 associated regulator of MAPK1 subtype 1 [Source:HGNC Symbol;Acc:HGNC:26136]	18	32124877	32470484	-1
ENSG00000278500	-4.67829	3.94658	-39.5745	1.99e-21	2.55e-19	39.0684	3233	AC009336.19		2	176151085	176173097	1
ENSG00000152977	-9.29393	4.21243	-43.257	3.05e-22	5.09e-20	39.0128	7545	ZIC1	Zic family member 1 [Source:HGNC Symbol;Acc:HGNC:12872]	3	147393422	147510293	1
ENSG00000106278	2.61448	6.77468	39.41	2.17e-21	2.74e-19	38.989	5803	PTPRZ1	protein tyrosine phosphatase, receptor type Z1 [Source:HGNC Symbol;Acc:HGNC:9685]	7	121873089	122062036	1
ENSG00000112175	-4.3825	3.52753	-39.6045	1.95e-21	2.52e-19	38.9889	653	BMP5	bone morphogenetic protein 5 [Source:HGNC Symbol;Acc:HGNC:1072]	6	55753645	55875564	-1
ENSG00000124575	-1.65835	7.82186	-39.3	2.3e-21	2.85e-19	38.8805	3007	HIST1H1D	histone cluster 1, H1d [Source:HGNC Symbol;Acc:HGNC:4717]	6	26234268	26234933	-1
ENSG00000147100	-2.12422	4.74339	-38.7375	3.11e-21	3.79e-19	38.8115	6567	SLC16A2	solute carrier family 16 member 2 [Source:HGNC Symbol;Acc:HGNC:10923]	X	74421461	74533917	1
ENSG00000112414	1.9316	7.23185	39.0315	2.65e-21	3.25e-19	38.7453	57211	ADGRG6	adhesion G protein-coupled receptor G6 [Source:HGNC Symbol;Acc:HGNC:13841]	6	142301854	142446266	1
ENSG00000242808	4.23116	3.28516	38.6858	3.2e-21	3.87e-19	38.691	347689	SOX2-OT	SOX2 overlapping transcript [Source:HGNC Symbol;Acc:HGNC:20209]	3	180989770	181836880	1
ENSG00000145687	-2.16805	5.44038	-38.5626	3.42e-21	4.11e-19	38.6615	23635	SSBP2	single stranded DNA binding protein 2 [Source:HGNC Symbol;Acc:HGNC:15831]	5	81413021	81751797	-1
ENSG00000184867	-1.86201	5.48782	-38.5006	3.54e-21	4.23e-19	38.6106	9823	ARMCX2	armadillo repeat containing, X-linked 2 [Source:HGNC Symbol;Acc:HGNC:16869]	X	101655281	101659891	-1
ENSG00000115902	2.67805	5.11053	38.4197	3.7e-21	4.39e-19	38.5873	6509	SLC1A4	solute carrier family 1 member 4 [Source:HGNC Symbol;Acc:HGNC:10942]	2	64988477	65023865	1
ENSG00000204580	-3.044	5.27993	-38.0876	4.44e-21	5.17e-19	38.4438	780 100616237	DDR1	discoidin domain receptor tyrosine kinase 1 [Source:HGNC Symbol;Acc:HGNC:2730]	6	30876421	30900156	1
ENSG00000172458	2.58261	3.62446	38.0262	4.59e-21	5.32e-19	38.4387	53342	IL17D	interleukin 17D [Source:HGNC Symbol;Acc:HGNC:5984]	13	20702127	20723098	1
ENSG00000241404	2.17664	4.57524	37.9743	4.73e-21	5.44e-19	38.3716	80864	EGFL8	EGF like domain multiple 8 [Source:HGNC Symbol;Acc:HGNC:13944]	6	32164583	32168281	1
ENSG00000114251	-4.31925	3.72806	-38.139	4.32e-21	5.06e-19	38.324	7474	WNT5A	Wnt family member 5A [Source:HGNC Symbol;Acc:HGNC:12784]	3	55465715	55490539	-1
ENSG00000179604	-3.51364	3.28357	-37.9487	4.79e-21	5.48e-19	38.2077	23580	CDC42EP4	CDC42 effector protein 4 [Source:HGNC Symbol;Acc:HGNC:17147]	17	73283624	73312175	-1
ENSG00000164626	1.78787	5.50011	37.8539	5.05e-21	5.71e-19	38.2075	8645	KCNK5	potassium two pore domain channel subfamily K member 5 [Source:HGNC Symbol;Acc:HGNC:6280]	6	39188973	39229450	-1
ENSG00000197837	-1.94677	5.73584	-37.8069	5.19e-21	5.82e-19	38.1992	121504	HIST4H4	histone cluster 4, H4 [Source:HGNC Symbol;Acc:HGNC:20510]	12	14767999	14771131	-1
ENSG00000170961	-2.35206	5.81523	-37.7543	5.34e-21	5.96e-19	38.1787	3037	HAS2	hyaluronan synthase 2 [Source:HGNC Symbol;Acc:HGNC:4819]	8	121612116	121641390	-1
ENSG00000115828	5.96725	2.3729	39.0524	2.63e-21	3.24e-19	38.1581	25797	QPCT	glutaminyl-peptide cyclotransferase [Source:HGNC Symbol;Acc:HGNC:9753]	2	37344574	37373322	1
ENSG00000185634	3.37211	3.25993	37.5536	5.97e-21	6.59e-19	38.135	399694	SHC4	SHC adaptor protein 4 [Source:HGNC Symbol;Acc:HGNC:16743]	15	48823735	48963444	-1
ENSG00000053254	1.69402	5.66017	37.7353	5.4e-21	5.99e-19	38.1228	1112	FOXN3	forkhead box N3 [Source:HGNC Symbol;Acc:HGNC:1928]	14	89124871	89619149	-1
ENSG00000171408	5.97338	1.87362	39.7209	1.84e-21	2.39e-19	38.0679	27115	PDE7B	phosphodiesterase 7B [Source:HGNC Symbol;Acc:HGNC:8792]	6	135851696	136195574	1
ENSG00000071054	1.12044	8.55349	37.9024	4.92e-21	5.59e-19	38.0541	9448	MAP4K4	mitogen-activated protein kinase kinase kinase kinase 4 [Source:HGNC Symbol;Acc:HGNC:6866]	2	101696850	101894689	1
ENSG00000172159	-4.95352	3.12078	-38.247	4.07e-21	4.79e-19	37.9765	257019	FRMD3	FERM domain containing 3 [Source:HGNC Symbol;Acc:HGNC:24125]	9	83242990	83538546	-1
ENSG00000197093	2.57654	3.48809	37.1961	7.3e-21	7.87e-19	37.9744	79690	GAL3ST4	galactose-3-O-sulfotransferase 4 [Source:HGNC Symbol;Acc:HGNC:24145]	7	100159244	100168750	-1
ENSG00000177606	2.09329	5.1268	37.3043	6.87e-21	7.49e-19	37.9376	3725	JUN	Jun proto-oncogene, AP-1 transcription factor subunit [Source:HGNC Symbol;Acc:HGNC:6204]	1	58780788	58784327	-1
ENSG00000064393	-2.11384	5.31732	-37.1649	7.43e-21	7.97e-19	37.8802	28996	HIPK2	homeodomain interacting protein kinase 2 [Source:HGNC Symbol;Acc:HGNC:14402]	7	139561570	139777778	-1
ENSG00000069702	1.57792	6.61821	37.3707	6.62e-21	7.26e-19	37.8359	7049	TGFBR3	transforming growth factor beta receptor 3 [Source:HGNC Symbol;Acc:HGNC:11774]	1	91680343	91906335	-1
ENSG00000101333	2.04785	5.97786	37.2492	7.09e-21	7.68e-19	37.8223	5332	PLCB4	phospholipase C beta 4 [Source:HGNC Symbol;Acc:HGNC:9059]	20	9068763	9481242	1
ENSG00000155760	-1.99749	5.12109	-37.0302	8.02e-21	8.5e-19	37.8171	8324	FZD7	frizzled class receptor 7 [Source:HGNC Symbol;Acc:HGNC:4045]	2	202034587	202038445	1
ENSG00000138061	-5.20415	5.431	-36.8383	8.94e-21	9.38e-19	37.7755	1545	CYP1B1	cytochrome P450 family 1 subfamily B member 1 [Source:HGNC Symbol;Acc:HGNC:2597]	2	38066973	38109902	-1
ENSG00000130429	1.59035	6.23831	36.9607	8.34e-21	8.79e-19	37.6242	10095	ARPC1B	actin related protein 2/3 complex subunit 1B [Source:HGNC Symbol;Acc:HGNC:704]	7	99374249	99394801	1
ENSG00000078114	-4.36024	3.78661	-36.7256	9.54e-21	9.84e-19	37.5789	10529	NEBL	nebulette [Source:HGNC Symbol;Acc:HGNC:16932]	10	20779973	21174187	-1
ENSG00000059804	-2.91367	6.24423	-36.5864	1.03e-20	1.05e-18	37.4847	6515	SLC2A3	solute carrier family 2 member 3 [Source:HGNC Symbol;Acc:HGNC:11007]	12	7919230	7936275	-1
ENSG00000007174	3.67017	3.17925	36.3867	1.16e-20	1.16e-18	37.4644	1770	DNAH9	dynein axonemal heavy chain 9 [Source:HGNC Symbol;Acc:HGNC:2953]	17	11598431	11969748	1
ENSG00000189067	1.72315	6.07294	36.6256	1.01e-20	1.03e-18	37.4427	9516	LITAF	lipopolysaccharide induced TNF factor [Source:HGNC Symbol;Acc:HGNC:16841]	16	11547722	11636381	-1
ENSG00000112769	2.90371	4.17562	36.2365	1.26e-20	1.24e-18	37.4177	3910	LAMA4	laminin subunit alpha 4 [Source:HGNC Symbol;Acc:HGNC:6484]	6	112108760	112254939	-1
ENSG00000075213	-5.38711	3.31982	-37.0514	7.92e-21	8.45e-19	37.367	10371	SEMA3A	semaphorin 3A [Source:HGNC Symbol;Acc:HGNC:10723]	7	83955777	84492724	-1
ENSG00000072832	1.3017	7.39036	36.6294	1.01e-20	1.03e-18	37.3593	1400	CRMP1	collapsin response mediator protein 1 [Source:HGNC Symbol;Acc:HGNC:2365]	4	5748084	5893058	-1
ENSG00000254138	3.22705	4.08604	36.0958	1.37e-20	1.31e-18	37.3442		RP11-152K4.2		5	31093977	31267610	-1
ENSG00000112902	-4.94262	4.09761	-36.2839	1.23e-20	1.23e-18	37.3374	9037	SEMA5A	semaphorin 5A [Source:HGNC Symbol;Acc:HGNC:10736]	5	9035026	9546075	-1
ENSG00000175183	-5.38109	3.4597	-36.7855	9.22e-21	9.58e-19	37.3002	1466	CSRP2	cysteine and glycine rich protein 2 [Source:HGNC Symbol;Acc:HGNC:2470]	12	76858715	76879060	-1
ENSG00000085511	1.22826	7.16428	36.4194	1.14e-20	1.15e-18	37.2452	4216	MAP3K4	mitogen-activated protein kinase kinase kinase 4 [Source:HGNC Symbol;Acc:HGNC:6856]	6	160991727	161117385	1
ENSG00000153234	4.52708	2.12039	36.7807	9.24e-21	9.58e-19	37.2377	4929	NR4A2	nuclear receptor subfamily 4 group A member 2 [Source:HGNC Symbol;Acc:HGNC:7981]	2	156324432	156342348	-1
ENSG00000165891	-2.82022	4.68955	-35.8753	1.56e-20	1.44e-18	37.2054	144455	E2F7	E2F transcription factor 7 [Source:HGNC Symbol;Acc:HGNC:23820]	12	77021247	77065580	-1
ENSG00000100605	1.44007	5.83629	36.1989	1.29e-20	1.26e-18	37.2051	3705	ITPK1	inositol-tetrakisphosphate 1-kinase [Source:HGNC Symbol;Acc:HGNC:6177]	14	92936914	93116320	-1
ENSG00000188452	1.91403	4.76839	35.9871	1.46e-20	1.38e-18	37.1992	375298	CERKL	ceramide kinase like [Source:HGNC Symbol;Acc:HGNC:21699]	2	181536676	181680665	-1
ENSG00000173598	1.73846	5.62243	36.1033	1.36e-20	1.31e-18	37.1742	11163	NUDT4	nudix hydrolase 4 [Source:HGNC Symbol;Acc:HGNC:8051]	12	93377883	93408146	1
ENSG00000136960	2.59934	5.0385	35.9182	1.52e-20	1.43e-18	37.1497	5168	ENPP2	ectonucleotide pyrophosphatase/phosphodiesterase 2 [Source:HGNC Symbol;Acc:HGNC:3357]	8	119557086	119673453	-1
ENSG00000154310	1.54129	7.33099	36.257	1.25e-20	1.23e-18	37.1407	23043	TNIK	TRAF2 and NCK interacting kinase [Source:HGNC Symbol;Acc:HGNC:30765]	3	171061339	171460408	-1
ENSG00000092964	-1.32045	7.75278	-36.2689	1.24e-20	1.23e-18	37.1399	1808	DPYSL2	dihydropyrimidinase like 2 [Source:HGNC Symbol;Acc:HGNC:3014]	8	26514022	26658178	1
ENSG00000114166	2.61098	3.85998	35.739	1.69e-20	1.54e-18	37.1361	8850	KAT2B	lysine acetyltransferase 2B [Source:HGNC Symbol;Acc:HGNC:8638]	3	20040023	20154404	1
ENSG00000175879	-3.22762	3.50664	-35.8171	1.61e-20	1.49e-18	37.1248	3234	HOXD8	homeobox D8 [Source:HGNC Symbol;Acc:HGNC:5139]	2	176129694	176132695	1
ENSG00000133069	2.07735	4.19464	35.7532	1.67e-20	1.53e-18	37.1172	9911	TMCC2	transmembrane and coiled-coil domain family 2 [Source:HGNC Symbol;Acc:HGNC:24239]	1	205228176	205273343	1
ENSG00000173638	-2.30434	4.71498	-35.7259	1.7e-20	1.54e-18	37.0997	6573	SLC19A1	solute carrier family 19 member 1 [Source:HGNC Symbol;Acc:HGNC:10937]	21	45493572	45544411	-1
ENSG00000164199	-2.26273	5.87464	-35.8824	1.55e-20	1.44e-18	37.0748	84059	ADGRV1	adhesion G protein-coupled receptor V1 [Source:HGNC Symbol;Acc:HGNC:17416]	5	90529344	91164221	1
ENSG00000188042	-4.77749	3.81718	-35.8934	1.54e-20	1.44e-18	37.0727	10123	ARL4C	ADP ribosylation factor like GTPase 4C [Source:HGNC Symbol;Acc:HGNC:698]	2	234493041	234497053	-1
ENSG00000176887	1.17176	7.96501	36.1743	1.31e-20	1.27e-18	37.0637	6664	SOX11	SRY-box 11 [Source:HGNC Symbol;Acc:HGNC:11191]	2	5692667	5701385	1
ENSG00000010818	-4.05005	3.95536	-35.6419	1.79e-20	1.61e-18	37.0334	3097	HIVEP2	human immunodeficiency virus type I enhancer binding protein 2 [Source:HGNC Symbol;Acc:HGNC:4921]	6	142751467	142945201	-1
ENSG00000127863	2.37786	7.34634	36.0137	1.44e-20	1.36e-18	36.9979	55504	TNFRSF19	TNF receptor superfamily member 19 [Source:HGNC Symbol;Acc:HGNC:11915]	13	23570370	23676104	1
ENSG00000019549	-2.47874	4.89207	-35.5628	1.87e-20	1.67e-18	36.9938	6591	SNAI2	snail family transcriptional repressor 2 [Source:HGNC Symbol;Acc:HGNC:11094]	8	48917690	48921740	-1
ENSG00000109654	1.28421	8.31863	36.0602	1.4e-20	1.33e-18	36.9811	23321	TRIM2	tripartite motif containing 2 [Source:HGNC Symbol;Acc:HGNC:15974]	4	153152342	153339320	1
ENSG00000152127	-1.83796	5.19189	-35.6322	1.8e-20	1.61e-18	36.9793	4249	MGAT5	mannosyl (alpha-1,6-)-glycoprotein beta-1,6-N-acetyl-glucosaminyltransferase [Source:HGNC Symbol;Acc:HGNC:7049]	2	134119983	134454621	1
ENSG00000003989	1.98738	4.70124	35.4026	2.06e-20	1.81e-18	36.8577	6542	SLC7A2	solute carrier family 7 member 2 [Source:HGNC Symbol;Acc:HGNC:11060]	8	17497088	17570573	1
ENSG00000095015	1.26511	7.40935	35.7207	1.71e-20	1.54e-18	36.8139	4214	MAP3K1	mitogen-activated protein kinase kinase kinase 1 [Source:HGNC Symbol;Acc:HGNC:6848]	5	56815574	56896152	1
ENSG00000197147	1.57691	5.15127	35.4001	2.06e-20	1.81e-18	36.7968	23507	LRRC8B	leucine rich repeat containing 8 family member B [Source:HGNC Symbol;Acc:HGNC:30692]	1	89524836	89597864	1
ENSG00000165323	-5.21306	4.66477	-35.1895	2.34e-20	2.02e-18	36.7851	120114	FAT3	FAT atypical cadherin 3 [Source:HGNC Symbol;Acc:HGNC:23112]	11	92352096	92896470	1
ENSG00000163520	-4.74709	4.07654	-35.1671	2.37e-20	2.04e-18	36.7231	2199	FBLN2	fibulin 2 [Source:HGNC Symbol;Acc:HGNC:3601]	3	13549131	13638422	1
ENSG00000107551	1.61747	5.66329	35.3592	2.11e-20	1.85e-18	36.7183	83937	RASSF4	Ras association domain family member 4 [Source:HGNC Symbol;Acc:HGNC:20793]	10	44959407	44995891	1
ENSG00000151012	-1.64478	6.52807	-35.4354	2.02e-20	1.79e-18	36.7166	23657	SLC7A11	solute carrier family 7 member 11 [Source:HGNC Symbol;Acc:HGNC:11059]	4	138164097	138242349	-1
ENSG00000166341	-1.7221	5.73195	-35.2434	2.26e-20	1.97e-18	36.6791	8642	DCHS1	dachsous cadherin-related 1 [Source:HGNC Symbol;Acc:HGNC:13681]	11	6621323	6655854	-1
ENSG00000148516	-5.19499	4.01952	-34.9718	2.66e-20	2.28e-18	36.5497	6935	ZEB1	zinc finger E-box binding homeobox 1 [Source:HGNC Symbol;Acc:HGNC:11642]	10	31318495	31529814	1
ENSG00000220884	-2.20459	5.20826	-34.8332	2.89e-20	2.46e-18	36.5082		MESTP1	mesoderm specific transcript pseudogene 1 [Source:HGNC Symbol;Acc:HGNC:29660]	6	128928995	128929988	-1
ENSG00000106236	-3.53851	4.63015	-34.4492	3.65e-20	3.01e-18	36.3677	4885	NPTX2	neuronal pentraxin 2 [Source:HGNC Symbol;Acc:HGNC:7953]	7	98617297	98629868	1
ENSG00000163820	1.88034	4.22722	34.5011	3.53e-20	2.94e-18	36.3527	79443	FYCO1	FYVE and coiled-coil domain containing 1 [Source:HGNC Symbol;Acc:HGNC:14673]	3	45917899	45995824	-1
ENSG00000110400	-2.64626	5.02394	-34.485	3.57e-20	2.96e-18	36.3332	5818	NECTIN1	nectin cell adhesion molecule 1 [Source:HGNC Symbol;Acc:HGNC:9706]	11	119623408	119729084	-1
ENSG00000102271	-4.00537	2.85676	-34.8484	2.86e-20	2.45e-18	36.3007	56062	KLHL4	kelch like family member 4 [Source:HGNC Symbol;Acc:HGNC:6355]	X	87517749	87670050	1
ENSG00000155974	-2.76534	3.58337	-34.332	3.92e-20	3.2e-18	36.2879	23426	GRIP1	glutamate receptor interacting protein 1 [Source:HGNC Symbol;Acc:HGNC:18708]	12	66347431	66804186	-1
ENSG00000145147	-3.11523	4.59506	-34.2422	4.14e-20	3.37e-18	36.2337	9353	SLIT2	slit guidance ligand 2 [Source:HGNC Symbol;Acc:HGNC:11086]	4	20253260	20620561	1
ENSG00000154734	1.72374	6.3515	34.6621	3.2e-20	2.68e-18	36.2291	9510	ADAMTS1	ADAM metallopeptidase with thrombospondin type 1 motif 1 [Source:HGNC Symbol;Acc:HGNC:217]	21	26835747	26845409	-1
ENSG00000100097	1.66007	4.64804	34.3471	3.88e-20	3.19e-18	36.2082	3956	LGALS1	galectin 1 [Source:HGNC Symbol;Acc:HGNC:6561]	22	37675608	37679806	1
ENSG00000115758	-1.65939	7.58473	-34.7142	3.11e-20	2.62e-18	36.2017	4953	ODC1	ornithine decarboxylase 1 [Source:HGNC Symbol;Acc:HGNC:8109]	2	10439968	10448504	-1
ENSG00000276600	2.85857	3.53207	34.1142	4.47e-20	3.6e-18	36.1679	338382	RAB7B	RAB7B, member RAS oncogene family [Source:HGNC Symbol;Acc:HGNC:30513]	1	205976740	206003461	-1
ENSG00000156925	-4.06971	4.18932	-34.0835	4.56e-20	3.62e-18	36.1368	7547	ZIC3	Zic family member 3 [Source:HGNC Symbol;Acc:HGNC:12874]	X	137566142	137577691	1
ENSG00000105894	1.40757	8.18459	34.6679	3.19e-20	2.68e-18	36.1321	5764	PTN	pleiotrophin [Source:HGNC Symbol;Acc:HGNC:9630]	7	137227341	137343865	-1
ENSG00000111799	-2.73271	6.26207	-34.2163	4.2e-20	3.41e-18	36.0314	1303	COL12A1	collagen type XII alpha 1 chain [Source:HGNC Symbol;Acc:HGNC:2188]	6	75084326	75206051	-1
ENSG00000172037	-1.69735	5.92277	-34.0998	4.51e-20	3.61e-18	35.9469	3913	LAMB2	laminin subunit beta 2 [Source:HGNC Symbol;Acc:HGNC:6487]	3	49121114	49133118	-1
ENSG00000250510	-3.13959	3.91719	-33.7446	5.62e-20	4.39e-18	35.938	27239	GPR162	G protein-coupled receptor 162 [Source:HGNC Symbol;Acc:HGNC:16693]	12	6821545	6829972	1
ENSG00000116711	2.20278	4.073	33.7662	5.54e-20	4.35e-18	35.9154	5321	PLA2G4A	phospholipase A2 group IVA [Source:HGNC Symbol;Acc:HGNC:9035]	1	186828953	186988981	1
ENSG00000168542	-6.03316	3.89238	-34.1108	4.48e-20	3.6e-18	35.8813	1281 100500837	COL3A1	collagen type III alpha 1 chain [Source:HGNC Symbol;Acc:HGNC:2201]	2	188974320	189012746	1
ENSG00000163235	6.67945	2.3309	34.8044	2.94e-20	2.49e-18	35.8284	7039	TGFA	transforming growth factor alpha [Source:HGNC Symbol;Acc:HGNC:11765]	2	70447280	70554193	-1
ENSG00000172379	1.49676	5.45951	33.874	5.19e-20	4.1e-18	35.8122	9915 100847042	ARNT2	aryl hydrocarbon receptor nuclear translocator 2 [Source:HGNC Symbol;Acc:HGNC:16876]	15	80404350	80597937	1
ENSG00000154127	-2.8307	4.23325	-33.4532	6.74e-20	5.12e-18	35.7531	84959	UBASH3B	ubiquitin associated and SH3 domain containing B [Source:HGNC Symbol;Acc:HGNC:29884]	11	122655675	122814473	1
ENSG00000165475	2.85161	3.84651	33.4499	6.75e-20	5.12e-18	35.7447	51084	CRYL1	crystallin lambda 1 [Source:HGNC Symbol;Acc:HGNC:18246]	13	20403667	20525857	-1
ENSG00000237682	1.57991	5.16944	33.6876	5.82e-20	4.53e-18	35.7286		RP3-514P16.1		X	101537485	101539276	-1
ENSG00000125430	-2.43164	3.8524	-33.3778	7.06e-20	5.28e-18	35.7115	9953	HS3ST3B1	heparan sulfate-glucosamine 3-sulfotransferase 3B1 [Source:HGNC Symbol;Acc:HGNC:5198]	17	14301083	14349404	1
ENSG00000104332	1.36807	6.65381	33.8577	5.24e-20	4.13e-18	35.6953	6422	SFRP1	secreted frizzled related protein 1 [Source:HGNC Symbol;Acc:HGNC:10776]	8	41261958	41309497	-1
ENSG00000173068	2.11379	4.81006	33.4658	6.68e-20	5.12e-18	35.6444	54796	BNC2	basonuclin 2 [Source:HGNC Symbol;Acc:HGNC:30988]	9	16409503	16870843	-1
ENSG00000167992	3.6194	2.18216	33.4901	6.58e-20	5.08e-18	35.5778	220001	VWCE	von Willebrand factor C and EGF domains [Source:HGNC Symbol;Acc:HGNC:26487]	11	61258286	61295424	-1
ENSG00000157510	3.7015	3.2334	33.1839	7.98e-20	5.82e-18	35.577	134265	AFAP1L1	actin filament associated protein 1 like 1 [Source:HGNC Symbol;Acc:HGNC:26714]	5	149271871	149341802	1
ENSG00000130147	-2.76675	4.99268	-33.186	7.97e-20	5.82e-18	35.5239	23677	SH3BP4	SH3 domain binding protein 4 [Source:HGNC Symbol;Acc:HGNC:10826]	2	234951973	235055714	1
ENSG00000185088	1.50969	6.21113	33.5163	6.48e-20	5.02e-18	35.5107	51065	RPS27L	ribosomal protein S27 like [Source:HGNC Symbol;Acc:HGNC:18476]	15	63125872	63158021	-1
ENSG00000157570	-2.77205	4.32192	-33.0598	8.63e-20	6.25e-18	35.4987	90139	TSPAN18	tetraspanin 18 [Source:HGNC Symbol;Acc:HGNC:20660]	11	44726465	44932421	1
ENSG00000099204	-1.90348	5.93008	-33.366	7.11e-20	5.29e-18	35.4862	3983	ABLIM1	actin binding LIM protein 1 [Source:HGNC Symbol;Acc:HGNC:78]	10	114431113	114685003	-1
ENSG00000135905	1.93775	5.69554	33.3834	7.04e-20	5.28e-18	35.483	55619	DOCK10	dedicator of cytokinesis 10 [Source:HGNC Symbol;Acc:HGNC:23479]	2	224765090	225042445	-1
ENSG00000137868	-1.50198	6.47162	-33.4069	6.93e-20	5.24e-18	35.4432	64220	STRA6	stimulated by retinoic acid 6 [Source:HGNC Symbol;Acc:HGNC:30650]	15	74179466	74212267	-1
ENSG00000163558	1.47512	6.5687	33.4548	6.73e-20	5.12e-18	35.4431	5584	PRKCI	protein kinase C iota [Source:HGNC Symbol;Acc:HGNC:9404]	3	170222365	170305981	1
ENSG00000128652	-4.74139	3.30706	-33.2926	7.45e-20	5.48e-18	35.4366	3232	HOXD3	homeobox D3 [Source:HGNC Symbol;Acc:HGNC:5137]	2	176136612	176173102	1
ENSG00000136068	-1.22509	7.44489	-33.3951	6.99e-20	5.26e-18	35.365	2317	FLNB	filamin B [Source:HGNC Symbol;Acc:HGNC:3755]	3	58008400	58172251	1
ENSG00000213694	-4.15957	4.04873	-32.8114	1.01e-19	7.23e-18	35.3397	1903	S1PR3	sphingosine-1-phosphate receptor 3 [Source:HGNC Symbol;Acc:HGNC:3167]	9	88991447	89005010	1
ENSG00000197622	1.20458	7.37375	33.3143	7.35e-20	5.45e-18	35.3046	56882	CDC42SE1	CDC42 small effector 1 [Source:HGNC Symbol;Acc:HGNC:17719]	1	151050971	151070325	-1
ENSG00000125266	-1.26833	6.30233	-33.1475	8.16e-20	5.93e-18	35.2826	1948	EFNB2	ephrin B2 [Source:HGNC Symbol;Acc:HGNC:3227]	13	106489731	106535114	-1
ENSG00000181234	-6.39721	3.72394	-33.3033	7.4e-20	5.46e-18	35.2714	92293	TMEM132C	transmembrane protein 132C [Source:HGNC Symbol;Acc:HGNC:25436]	12	128267403	128707915	1
ENSG00000075340	2.01084	4.3511	32.7767	1.03e-19	7.37e-18	35.2503	119	ADD2	adducin 2 [Source:HGNC Symbol;Acc:HGNC:244]	2	70607618	70768225	-1
ENSG00000021300	2.29092	3.7512	32.5912	1.16e-19	8.17e-18	35.1923	58473	PLEKHB1	pleckstrin homology domain containing B1 [Source:HGNC Symbol;Acc:HGNC:19079]	11	73646178	73662819	1
ENSG00000157680	3.10429	2.76546	32.464	1.26e-19	8.77e-18	35.1021	9162	DGKI	diacylglycerol kinase iota [Source:HGNC Symbol;Acc:HGNC:2855]	7	137381037	137847092	-1
ENSG00000172175	-1.3248	5.78618	-32.7232	1.07e-19	7.59e-18	35.0586	10892	MALT1	MALT1 paracaspase [Source:HGNC Symbol;Acc:HGNC:6819]	18	58671386	58754477	1
ENSG00000156140	-3.66666	3.28386	-32.3968	1.32e-19	9.09e-18	35.0163	9508	ADAMTS3	ADAM metallopeptidase with thrombospondin type 1 motif 3 [Source:HGNC Symbol;Acc:HGNC:219]	4	72280969	72569386	-1
ENSG00000156299	1.12594	7.10187	32.8389	9.93e-20	7.13e-18	35.007	7074	TIAM1	T-cell lymphoma invasion and metastasis 1 [Source:HGNC Symbol;Acc:HGNC:11805]	21	31118416	31559977	-1
ENSG00000142669	-1.71525	5.24984	-32.5196	1.22e-19	8.49e-18	35.0066	83442	SH3BGRL3	SH3 domain binding glutamate rich protein like 3 [Source:HGNC Symbol;Acc:HGNC:15568]	1	26279176	26281522	1
ENSG00000138795	-1.45708	6.28724	-32.6861	1.09e-19	7.72e-18	34.9874	51176	LEF1	lymphoid enhancer binding factor 1 [Source:HGNC Symbol;Acc:HGNC:6551]	4	108047545	108168956	-1
ENSG00000115825	1.3182	7.91728	32.8509	9.85e-20	7.11e-18	34.9764	23683	PRKD3	protein kinase D3 [Source:HGNC Symbol;Acc:HGNC:9408]	2	37250502	37324808	-1
ENSG00000158966	-1.5899	5.72117	-32.5324	1.21e-19	8.45e-18	34.9512	57685	CACHD1	cache domain containing 1 [Source:HGNC Symbol;Acc:HGNC:29314]	1	64470792	64693058	1
ENSG00000151388	-3.0606	2.94575	-32.0882	1.61e-19	1.09e-17	34.8127	81792	ADAMTS12	ADAM metallopeptidase with thrombospondin type 1 motif 12 [Source:HGNC Symbol;Acc:HGNC:14605]	5	33523535	33892192	-1
ENSG00000128713	-5.80637	3.07937	-32.719	1.07e-19	7.59e-18	34.78	3237	HOXD11	homeobox D11 [Source:HGNC Symbol;Acc:HGNC:5134]	2	176104216	176109754	1
ENSG00000131459	-3.20117	3.83252	-31.911	1.81e-19	1.2e-17	34.7743	9945	GFPT2	glutamine-fructose-6-phosphate transaminase 2 [Source:HGNC Symbol;Acc:HGNC:4242]	5	180300690	180353387	-1
ENSG00000170166	-4.03567	3.47901	-31.9445	1.77e-19	1.18e-17	34.7349	3233	HOXD4	homeobox D4 [Source:HGNC Symbol;Acc:HGNC:5138]	2	176151222	176153226	1
ENSG00000188647	1.25347	7.59456	32.3999	1.31e-19	9.09e-18	34.6916	375743	PTAR1	protein prenyltransferase alpha subunit repeat containing 1 [Source:HGNC Symbol;Acc:HGNC:30449]	9	69709522	69759959	-1
ENSG00000158352	1.5163	5.04148	32.0518	1.65e-19	1.11e-17	34.6731	57477	SHROOM4	shroom family member 4 [Source:HGNC Symbol;Acc:HGNC:29215]	X	50591647	50814302	-1
ENSG00000151746	1.76628	4.48492	31.9291	1.78e-19	1.19e-17	34.6688	636	BICD1	BICD cargo adaptor 1 [Source:HGNC Symbol;Acc:HGNC:1049]	12	32106835	32383633	1
ENSG00000169604	-1.44055	5.19089	-31.9492	1.76e-19	1.18e-17	34.6216	84168	ANTXR1	anthrax toxin receptor 1 [Source:HGNC Symbol;Acc:HGNC:21014]	2	69013178	69249327	1
ENSG00000058091	-2.15818	5.63155	-31.9462	1.77e-19	1.18e-17	34.5993	5218	CDK14	cyclin dependent kinase 14 [Source:HGNC Symbol;Acc:HGNC:8883]	7	90466424	91210590	1
ENSG00000131711	-1.07165	8.07291	-32.2631	1.44e-19	9.8e-18	34.5879	4131	MAP1B	microtubule associated protein 1B [Source:HGNC Symbol;Acc:HGNC:6836]	5	72107234	72209570	1
ENSG00000126733	-4.70144	2.85124	-32.0968	1.6e-19	1.09e-17	34.5666	117154	DACH2	dachshund family transcription factor 2 [Source:HGNC Symbol;Acc:HGNC:16814]	X	86148458	86832604	1
ENSG00000221866	3.72518	3.07408	31.5925	2.23e-19	1.44e-17	34.5529	91584	PLXNA4	plexin A4 [Source:HGNC Symbol;Acc:HGNC:9102]	7	132123332	132648688	-1
ENSG00000187068	1.73612	4.54675	31.7431	2.02e-19	1.32e-17	34.5352	285382	C3orf70	chromosome 3 open reading frame 70 [Source:HGNC Symbol;Acc:HGNC:33731]	3	185078050	185153014	-1
ENSG00000137203	2.30151	3.65094	31.4581	2.43e-19	1.56e-17	34.4526	7020	TFAP2A	transcription factor AP-2 alpha [Source:HGNC Symbol;Acc:HGNC:11742]	6	10393186	10419659	-1
ENSG00000129675	2.80504	3.21748	31.4164	2.5e-19	1.6e-17	34.4493	9459	ARHGEF6	Rac/Cdc42 guanine nucleotide exchange factor 6 [Source:HGNC Symbol;Acc:HGNC:685]	X	136665547	136782088	-1
ENSG00000072786	1.37181	5.59602	31.8035	1.94e-19	1.27e-17	34.4356	6793	STK10	serine/threonine kinase 10 [Source:HGNC Symbol;Acc:HGNC:11388]	5	172042073	172188386	-1
ENSG00000117394	-2.61355	6.16127	-31.6912	2.09e-19	1.36e-17	34.3861	6513	SLC2A1	solute carrier family 2 member 1 [Source:HGNC Symbol;Acc:HGNC:11005]	1	42925375	42959173	-1
ENSG00000185551	1.91898	4.74486	31.5529	2.29e-19	1.48e-17	34.3856	7026 100302258	NR2F2	nuclear receptor subfamily 2 group F member 2 [Source:HGNC Symbol;Acc:HGNC:7976]	15	96325938	96340263	1
ENSG00000157593	1.28936	6.91955	31.8787	1.84e-19	1.22e-17	34.3756	347734 100616124	SLC35B2	solute carrier family 35 member B2 [Source:HGNC Symbol;Acc:HGNC:16872]	6	44254096	44257890	-1
ENSG00000164099	2.42195	3.61752	31.2924	2.72e-19	1.72e-17	34.3457	8492	PRSS12	protease, serine 12 [Source:HGNC Symbol;Acc:HGNC:9477]	4	118280038	118353003	-1
ENSG00000182372	1.4613	4.4702	31.4061	2.52e-19	1.6e-17	34.3109	2055 100500912	CLN8	ceroid-lipofuscinosis, neuronal 8 [Source:HGNC Symbol;Acc:HGNC:2079]	8	1755778	1801711	1
ENSG00000131089	1.14572	6.98185	31.7817	1.97e-19	1.29e-17	34.3057	23229	ARHGEF9	Cdc42 guanine nucleotide exchange factor 9 [Source:HGNC Symbol;Acc:HGNC:14561]	X	63634967	63809274	-1
ENSG00000278291	2.58889	2.89908	30.9855	3.34e-19	2.1e-17	34.16		RP11-172H24.4		13	20699307	20703718	-1
ENSG00000118276	1.67343	5.7369	31.2186	2.85e-19	1.81e-17	34.0268	9331	B4GALT6	beta-1,4-galactosyltransferase 6 [Source:HGNC Symbol;Acc:HGNC:929]	18	31622247	31685836	-1
ENSG00000189120	-10.2505	2.67939	-36.1282	1.35e-20	1.3e-18	34.0177	80320	SP6	Sp6 transcription factor [Source:HGNC Symbol;Acc:HGNC:14530]	17	47844908	47855874	-1
ENSG00000225205	2.42347	2.91488	30.7108	4.02e-19	2.45e-17	33.9763		AC093818.1		2	172480840	172556596	-1
ENSG00000170927	4.42041	2.19016	30.944	3.43e-19	2.15e-17	33.939	5314	PKHD1	polycystic kidney and hepatic disease 1 (autosomal recessive) [Source:HGNC Symbol;Acc:HGNC:9016]	6	51615300	52087625	-1
ENSG00000197381	1.67615	4.8573	30.8828	3.58e-19	2.22e-17	33.9038	104	ADARB1	adenosine deaminase, RNA specific B1 [Source:HGNC Symbol;Acc:HGNC:226]	21	45073853	45226560	1
ENSG00000082293	7.64991	1.86914	32.291	1.41e-19	9.66e-18	33.8896	1310	COL19A1	collagen type XIX alpha 1 chain [Source:HGNC Symbol;Acc:HGNC:2196]	6	69866571	70209976	1
ENSG00000139722	1.63455	5.56625	30.9212	3.49e-19	2.17e-17	33.8388	79720	VPS37B	VPS37B, ESCRT-I subunit [Source:HGNC Symbol;Acc:HGNC:25754]	12	122865328	122896444	-1
ENSG00000102996	3.16829	4.47148	30.6369	4.23e-19	2.57e-17	33.8364	4324	MMP15	matrix metallopeptidase 15 [Source:HGNC Symbol;Acc:HGNC:7161]	16	58025566	58046901	1
ENSG00000182054	1.08106	6.80803	30.9635	3.39e-19	2.13e-17	33.7519	3418	IDH2	isocitrate dehydrogenase (NADP(+)) 2, mitochondrial [Source:HGNC Symbol;Acc:HGNC:5383]	15	90083045	90102504	-1
ENSG00000110811	-1.58367	4.849	-30.5975	4.34e-19	2.62e-17	33.7481	10536	P3H3	prolyl 3-hydroxylase 3 [Source:HGNC Symbol;Acc:HGNC:19318]	12	6828410	6839851	1
ENSG00000100979	-1.36425	6.02945	-30.7806	3.83e-19	2.35e-17	33.7147	5360	PLTP	phospholipid transfer protein [Source:HGNC Symbol;Acc:HGNC:9093]	20	45898621	45912155	-1
ENSG00000162998	-5.15775	3.21592	-30.606	4.32e-19	2.62e-17	33.6884	2487	FRZB	frizzled-related protein [Source:HGNC Symbol;Acc:HGNC:3959]	2	182833275	182867162	-1
ENSG00000035687	1.47169	6.45488	30.7804	3.83e-19	2.35e-17	33.6512	159	ADSS	adenylosuccinate synthase [Source:HGNC Symbol;Acc:HGNC:292]	1	244408494	244452134	-1
ENSG00000185339	-3.63254	3.30128	-30.2791	5.4e-19	3.19e-17	33.648	6948	TCN2	transcobalamin 2 [Source:HGNC Symbol;Acc:HGNC:11653]	22	30606838	30627278	1
ENSG00000168785	-1.54557	5.02524	-30.4731	4.73e-19	2.84e-17	33.6345	10098	TSPAN5	tetraspanin 5 [Source:HGNC Symbol;Acc:HGNC:17753]	4	98470367	98658629	-1
ENSG00000113657	-1.09476	7.61686	-30.8042	3.77e-19	2.33e-17	33.6082	1809	DPYSL3	dihydropyrimidinase like 3 [Source:HGNC Symbol;Acc:HGNC:3015]	5	147390811	147510056	-1
ENSG00000116574	-2.91545	3.78265	-30.1698	5.82e-19	3.38e-17	33.6044	58480	RHOU	ras homolog family member U [Source:HGNC Symbol;Acc:HGNC:17794]	1	228735077	228746669	1
ENSG00000106261	1.0718	7.51668	30.7982	3.79e-19	2.33e-17	33.5986	7586	ZKSCAN1	zinc finger with KRAB and SCAN domains 1 [Source:HGNC Symbol;Acc:HGNC:13101]	7	100015572	100041689	1
ENSG00000166833	-3.48626	3.51253	-30.0694	6.24e-19	3.59e-17	33.5289	89797	NAV2	neuron navigator 2 [Source:HGNC Symbol;Acc:HGNC:15997]	11	19350724	20121598	1
ENSG00000204335	-4.42074	3.58191	-30.089	6.16e-19	3.56e-17	33.5074	389058	SP5	Sp5 transcription factor [Source:HGNC Symbol;Acc:HGNC:14529]	2	170715351	170718078	1
ENSG00000259417	6.35825	0.835539	32.3289	1.38e-19	9.46e-18	33.5053		LINC01314	long intergenic non-protein coding RNA 1314 [Source:HGNC Symbol;Acc:HGNC:50507]	15	80195484	80252213	-1
ENSG00000182175	-2.59098	4.47728	-30.0794	6.2e-19	3.57e-17	33.4808	56963	RGMA	repulsive guidance molecule family member a [Source:HGNC Symbol;Acc:HGNC:30308]	15	93035273	93089204	-1
ENSG00000144857	-4.35442	2.72629	-30.3175	5.26e-19	3.13e-17	33.4757	91653	BOC	BOC cell adhesion associated, oncogene regulated [Source:HGNC Symbol;Acc:HGNC:17173]	3	113211003	113287459	1
ENSG00000144791	1.32575	6.22361	30.4942	4.66e-19	2.81e-17	33.4666	8994	LIMD1	LIM domains containing 1 [Source:HGNC Symbol;Acc:HGNC:6612]	3	45555394	45686338	1
ENSG00000113552	1.44341	5.27822	30.3047	5.3e-19	3.15e-17	33.4363	10007	GNPDA1	glucosamine-6-phosphate deaminase 1 [Source:HGNC Symbol;Acc:HGNC:4417]	5	141991749	142013041	-1
ENSG00000120093	-1.65887	5.39859	-30.2365	5.56e-19	3.28e-17	33.4221	3213	HOXB3	homeobox B3 [Source:HGNC Symbol;Acc:HGNC:5114]	17	48548870	48604912	-1
ENSG00000119408	1.65674	4.94478	30.1982	5.71e-19	3.34e-17	33.4107	10783	NEK6	NIMA related kinase 6 [Source:HGNC Symbol;Acc:HGNC:7749]	9	124257606	124353307	1
ENSG00000141449	-1.82	5.95656	-30.1953	5.72e-19	3.34e-17	33.3293	80000	GREB1L	growth regulation by estrogen in breast cancer 1 like [Source:HGNC Symbol;Acc:HGNC:31042]	18	21242242	21525417	1
ENSG00000143341	1.51222	6.79821	30.3263	5.23e-19	3.12e-17	33.3059	83872	HMCN1	hemicentin 1 [Source:HGNC Symbol;Acc:HGNC:19194]	1	185734551	186190949	1
ENSG00000101224	-1.5362	5.06826	-29.9775	6.65e-19	3.8e-17	33.2768	994	CDC25B	cell division cycle 25B [Source:HGNC Symbol;Acc:HGNC:1726]	20	3786772	3806121	1
ENSG00000160963	-2.49662	4.52862	-29.6875	8.14e-19	4.49e-17	33.1923	136227	COL26A1	collagen type XXVI alpha 1 chain [Source:HGNC Symbol;Acc:HGNC:18038]	7	101362820	101559024	1
ENSG00000118322	6.80792	2.37922	30.1741	5.8e-19	3.38e-17	33.1692	23120	ATP10B	ATPase phospholipid transporting 10B (putative) [Source:HGNC Symbol;Acc:HGNC:13543]	5	160563120	160852214	-1
ENSG00000167191	-2.43879	4.21759	-29.6072	8.61e-19	4.74e-17	33.1659	51704	GPRC5B	G protein-coupled receptor class C group 5 member B [Source:HGNC Symbol;Acc:HGNC:13308]	16	19856691	19886167	-1
ENSG00000171004	-2.25557	4.28682	-29.5685	8.85e-19	4.85e-17	33.1231	90161	HS6ST2	heparan sulfate 6-O-sulfotransferase 2 [Source:HGNC Symbol;Acc:HGNC:19133]	X	132626016	132961395	-1
ENSG00000167393	1.50443	4.63797	29.7326	7.89e-19	4.38e-17	33.1172	28227	PPP2R3B	protein phosphatase 2 regulatory subunit B''beta [Source:HGNC Symbol;Acc:HGNC:13417]	X	333963	386955	-1
ENSG00000273604	-2.50799	3.93779	-29.4754	9.45e-19	5.13e-17	33.0989	100170841	C17orf96	chromosome 17 open reading frame 96 [Source:HGNC Symbol;Acc:HGNC:34493]	17	38671703	38675421	-1
ENSG00000172878	1.73839	4.0295	29.5648	8.87e-19	4.85e-17	33.0858	254042	METAP1D	methionyl aminopeptidase type 1D (mitochondrial) [Source:HGNC Symbol;Acc:HGNC:32583]	2	171999583	172082430	1
ENSG00000196227	1.14555	5.92414	29.8878	7.08e-19	4.01e-17	33.0586	63939	FAM217B	family with sequence similarity 217 member B [Source:HGNC Symbol;Acc:HGNC:16170]	20	59933764	59948680	1
ENSG00000151883	1.14585	5.76529	29.8161	7.44e-19	4.19e-17	33.0233	79668	PARP8	poly(ADP-ribose) polymerase family member 8 [Source:HGNC Symbol;Acc:HGNC:26124]	5	50665899	50846522	1
ENSG00000182022	-7.71736	-1.24073	-34.0832	4.56e-20	3.62e-18	33.0153	51363	CHST15	carbohydrate sulfotransferase 15 [Source:HGNC Symbol;Acc:HGNC:18137]	10	124007666	124093607	-1
ENSG00000111666	1.4792	5.31392	29.7133	8e-19	4.42e-17	33.0089	56994	CHPT1	choline phosphotransferase 1 [Source:HGNC Symbol;Acc:HGNC:17852]	12	101696947	101744140	1
ENSG00000116017	-1.7371	6.32006	-29.7901	7.58e-19	4.23e-17	32.9941	1820	ARID3A	AT-rich interaction domain 3A [Source:HGNC Symbol;Acc:HGNC:3031]	19	925781	975934	1
ENSG00000165392	1.41831	6.11806	29.803	7.51e-19	4.22e-17	32.9831	7486	WRN	Werner syndrome RecQ like helicase [Source:HGNC Symbol;Acc:HGNC:12791]	8	31033801	31173769	1
ENSG00000129116	-1.83463	4.68236	-29.4206	9.83e-19	5.31e-17	32.9461	23022	PALLD	palladin, cytoskeletal associated protein [Source:HGNC Symbol;Acc:HGNC:17068]	4	168497066	168928457	1
ENSG00000112182	-2.77973	3.40013	-29.2051	1.14e-18	6.07e-17	32.9321	60468	BACH2	BTB domain and CNC homolog 2 [Source:HGNC Symbol;Acc:HGNC:14078]	6	89926529	90296908	-1
ENSG00000185070	-2.85879	3.85522	-29.1813	1.16e-18	6.16e-17	32.9035	23768	FLRT2	fibronectin leucine rich transmembrane protein 2 [Source:HGNC Symbol;Acc:HGNC:3761]	14	85530144	85654426	1
ENSG00000088882	-1.74966	7.35434	-29.7669	7.7e-19	4.29e-17	32.8907	56265	CPXM1	carboxypeptidase X, M14 family member 1 [Source:HGNC Symbol;Acc:HGNC:15771]	20	2794069	2800637	-1
ENSG00000074416	5.21086	1.4625	29.9108	6.97e-19	3.97e-17	32.8835	11343	MGLL	monoglyceride lipase [Source:HGNC Symbol;Acc:HGNC:17038]	3	127689062	127823250	-1
ENSG00000115306	0.998815	10.0365	29.8829	7.1e-19	4.01e-17	32.8484	6711	SPTBN1	spectrin beta, non-erythrocytic 1 [Source:HGNC Symbol;Acc:HGNC:11275]	2	54456285	54671445	1
ENSG00000280138	1.75749	4.2776	29.2492	1.11e-18	5.93e-17	32.8244		RP11-463O12.5		12	122870059	122888720	-1
ENSG00000187164	2.31436	3.63595	29.1196	1.22e-18	6.38e-17	32.8233	57698	SHTN1	shootin 1 [Source:HGNC Symbol;Acc:HGNC:29319]	10	116881482	117005577	-1
ENSG00000231817	7.57718	0.97245	31.5196	2.34e-19	1.5e-17	32.7422		LINC01198	long intergenic non-protein coding RNA 1198 [Source:HGNC Symbol;Acc:HGNC:49598]	13	46455135	46486506	-1
ENSG00000044524	-2.54951	3.52532	-28.9245	1.4e-18	7.18e-17	32.7277	2042	EPHA3	EPH receptor A3 [Source:HGNC Symbol;Acc:HGNC:3387]	3	89107524	89482134	1
ENSG00000174607	-1.41652	7.45502	-29.5467	8.99e-19	4.9e-17	32.7195	7368	UGT8	UDP glycosyltransferase 8 [Source:HGNC Symbol;Acc:HGNC:12555]	4	114598455	114678224	1
ENSG00000180818	-2.05473	4.35977	-29.0048	1.32e-18	6.79e-17	32.6967	3226	HOXC10	homeobox C10 [Source:HGNC Symbol;Acc:HGNC:5122]	12	53985065	53990279	1
ENSG00000144366	1.45347	6.49359	29.4133	9.88e-19	5.32e-17	32.6679	51454	GULP1	GULP, engulfment adaptor PTB domain containing 1 [Source:HGNC Symbol;Acc:HGNC:18649]	2	188291669	188595931	1
ENSG00000257453	2.62536	3.28738	28.8569	1.47e-18	7.45e-17	32.6677		RP11-290L1.3		12	76030494	76031378	1
ENSG00000107874	1.28899	5.70376	29.281	1.08e-18	5.81e-17	32.6425	79004	CUEDC2	CUE domain containing 2 [Source:HGNC Symbol;Acc:HGNC:28352]	10	102423245	102432661	-1
ENSG00000157216	-1.54172	4.70909	-29.0281	1.3e-18	6.72e-17	32.6405	23648	SSBP3	single stranded DNA binding protein 3 [Source:HGNC Symbol;Acc:HGNC:15674]	1	54225432	54413479	-1
ENSG00000171877	2.89832	3.18003	28.8028	1.53e-18	7.73e-17	32.638	84978	FRMD5	FERM domain containing 5 [Source:HGNC Symbol;Acc:HGNC:28214]	15	43870761	44195252	-1
ENSG00000146072	-2.17109	6.07795	-29.2116	1.14e-18	6.06e-17	32.6198	27242	TNFRSF21	TNF receptor superfamily member 21 [Source:HGNC Symbol;Acc:HGNC:13469]	6	47231532	47309905	-1
ENSG00000183762	-2.7433	3.87711	-28.7636	1.57e-18	7.91e-17	32.5971	83999	KREMEN1	kringle containing transmembrane protein 1 [Source:HGNC Symbol;Acc:HGNC:17550]	22	29073078	29168333	1
ENSG00000115844	6.47737	1.87626	29.475	9.45e-19	5.13e-17	32.5621	1746	DLX2	distal-less homeobox 2 [Source:HGNC Symbol;Acc:HGNC:2915]	2	172099439	172102900	-1
ENSG00000162783	-1.93308	4.25652	-28.7704	1.56e-18	7.89e-17	32.5313	51278	IER5	immediate early response 5 [Source:HGNC Symbol;Acc:HGNC:5393]	1	181088712	181092899	1
ENSG00000152503	1.39563	5.75369	29.1273	1.21e-18	6.36e-17	32.5257	55521	TRIM36	tripartite motif containing 36 [Source:HGNC Symbol;Acc:HGNC:16280]	5	115124762	115180546	-1
ENSG00000124942	-2.82565	6.33589	-29.0606	1.27e-18	6.62e-17	32.5118	79026	AHNAK	AHNAK nucleoprotein [Source:HGNC Symbol;Acc:HGNC:347]	11	62433542	62556235	-1
ENSG00000112137	2.4349	3.16712	28.6347	1.73e-18	8.54e-17	32.5101	221692	PHACTR1	phosphatase and actin regulator 1 [Source:HGNC Symbol;Acc:HGNC:20990]	6	12716805	13290484	1
ENSG00000099954	-1.45638	5.48652	-29.0055	1.32e-18	6.79e-17	32.5075	27443	CECR2	CECR2, histone acetyl-lysine reader [Source:HGNC Symbol;Acc:HGNC:1840]	22	17359949	17558149	1
ENSG00000101096	4.53999	1.41515	29.1621	1.18e-18	6.22e-17	32.4982	4773	NFATC2	nuclear factor of activated T-cells 2 [Source:HGNC Symbol;Acc:HGNC:7776]	20	51386957	51562831	-1
ENSG00000184486	-4.21893	4.38967	-28.6072	1.76e-18	8.67e-17	32.4943	5454	POU3F2	POU class 3 homeobox 2 [Source:HGNC Symbol;Acc:HGNC:9215]	6	98834592	98839470	1
ENSG00000198561	0.917959	7.95367	29.2845	1.08e-18	5.81e-17	32.4895	1500	CTNND1	catenin delta 1 [Source:HGNC Symbol;Acc:HGNC:2515]	11	57753243	57819546	1
ENSG00000157502	-2.52322	3.58706	-28.5935	1.78e-18	8.74e-17	32.4842	139221	MUM1L1	MUM1 like 1 [Source:HGNC Symbol;Acc:HGNC:26583]	X	106168305	106208956	1
ENSG00000245526	5.58758	1.87988	29.0449	1.28e-18	6.67e-17	32.4491	407047 645323	LINC00461	long intergenic non-protein coding RNA 461 [Source:HGNC Symbol;Acc:HGNC:42810]	5	88507546	88691041	-1
ENSG00000111885	-2.70454	3.21125	-28.5308	1.86e-18	9.08e-17	32.4469	4121	MAN1A1	mannosidase alpha class 1A member 1 [Source:HGNC Symbol;Acc:HGNC:6821]	6	119177209	119349761	-1
ENSG00000078053	-5.51264	2.42664	-29.2247	1.13e-18	6.02e-17	32.4127	273	AMPH	amphiphysin [Source:HGNC Symbol;Acc:HGNC:471]	7	38383704	38631567	-1
ENSG00000165895	1.4458	5.13401	28.8631	1.46e-18	7.45e-17	32.4089	143872	ARHGAP42	Rho GTPase activating protein 42 [Source:HGNC Symbol;Acc:HGNC:26545]	11	100687653	100991937	1
ENSG00000007384	1.66859	4.45995	28.7032	1.64e-18	8.16e-17	32.3938	64285	RHBDF1	rhomboid 5 homolog 1 [Source:HGNC Symbol;Acc:HGNC:20561]	16	58059	76355	-1
ENSG00000103187	-1.68161	8.26785	-29.0955	1.24e-18	6.47e-17	32.35	23406	COTL1	coactosin like F-actin binding protein 1 [Source:HGNC Symbol;Acc:HGNC:18304]	16	84565594	84618077	-1
ENSG00000113532	-2.57049	3.90719	-28.4336	2e-18	9.67e-17	32.3467	7903	ST8SIA4	ST8 alpha-N-acetyl-neuraminide alpha-2,8-sialyltransferase 4 [Source:HGNC Symbol;Acc:HGNC:10871]	5	100806935	100903266	-1
ENSG00000155363	-1.31255	5.39497	-28.7583	1.58e-18	7.92e-17	32.3295	4343	MOV10	Mov10 RISC complex RNA helicase [Source:HGNC Symbol;Acc:HGNC:7200]	1	112673141	112700746	1
ENSG00000072274	-1.09174	8.1539	-29.0358	1.29e-18	6.7e-17	32.3056	7037	TFRC	transferrin receptor [Source:HGNC Symbol;Acc:HGNC:11763]	3	196027183	196082189	-1
ENSG00000133687	-3.75999	2.51339	-28.5142	1.88e-18	9.16e-17	32.289	83857	TMTC1	transmembrane and tetratricopeptide repeat containing 1 [Source:HGNC Symbol;Acc:HGNC:24099]	12	29500840	29784759	-1
ENSG00000171843	-1.19403	5.87977	-28.7342	1.61e-18	8.02e-17	32.2439	4300	MLLT3	MLLT3, super elongation complex subunit [Source:HGNC Symbol;Acc:HGNC:7136]	9	20341665	20622543	-1
ENSG00000162849	-3.00039	2.99082	-28.2552	2.28e-18	1.09e-16	32.2326	55083	KIF26B	kinesin family member 26B [Source:HGNC Symbol;Acc:HGNC:25484]	1	245154985	245709431	1
ENSG00000175155	2.63853	3.05702	28.2388	2.3e-18	1.09e-16	32.2273	388403	YPEL2	yippee like 2 [Source:HGNC Symbol;Acc:HGNC:18326]	17	59331689	59401729	1
ENSG00000144283	-1.37696	6.00743	-28.7161	1.63e-18	8.1e-17	32.223	8502	PKP4	plakophilin 4 [Source:HGNC Symbol;Acc:HGNC:9026]	2	158456964	158682879	1
ENSG00000117450	-1.34429	8.11303	-28.8623	1.46e-18	7.45e-17	32.1801	5052	PRDX1	peroxiredoxin 1 [Source:HGNC Symbol;Acc:HGNC:9352]	1	45511036	45523047	-1
ENSG00000135838	3.70551	1.73447	28.3432	2.13e-18	1.03e-16	32.1492	80896	NPL	N-acetylneuraminate pyruvate lyase [Source:HGNC Symbol;Acc:HGNC:16781]	1	182789293	182830384	1
ENSG00000167105	6.97341	-0.463263	30.9251	3.48e-19	2.17e-17	32.1376	162461	TMEM92	transmembrane protein 92 [Source:HGNC Symbol;Acc:HGNC:26579]	17	50271406	50281485	1
ENSG00000279160	-8.61878	-0.430268	-31.828	1.91e-19	1.26e-17	32.1325		RP11-387A1.6		2	176189919	176192538	-1
ENSG00000090097	1.05029	7.11931	28.7418	1.6e-18	7.99e-17	32.1268	57060	PCBP4	poly(rC) binding protein 4 [Source:HGNC Symbol;Acc:HGNC:8652]	3	51957454	51974016	-1
ENSG00000197565	-4.0342	3.41833	-28.1025	2.55e-18	1.18e-16	32.1179	1288	COL4A6	collagen type IV alpha 6 chain [Source:HGNC Symbol;Acc:HGNC:2208]	X	108155607	108439497	-1
ENSG00000184384	1.73831	4.52178	28.3338	2.15e-18	1.03e-16	32.11	84441	MAML2	mastermind like transcriptional coactivator 2 [Source:HGNC Symbol;Acc:HGNC:16259]	11	95976598	96343180	-1
ENSG00000149782	-1.324	5.42263	-28.4543	1.97e-18	9.55e-17	32.0983	5331	PLCB3	phospholipase C beta 3 [Source:HGNC Symbol;Acc:HGNC:9056]	11	64251523	64269150	1
ENSG00000145685	1.54273	4.84814	28.3741	2.09e-18	1.01e-16	32.0863	10184	LHFPL2	lipoma HMGIC fusion partner-like 2 [Source:HGNC Symbol;Acc:HGNC:6588]	5	78485215	78770021	-1
ENSG00000148082	-2.21204	4.33043	-28.162	2.44e-18	1.15e-16	32.0827	53358	SHC3	SHC adaptor protein 3 [Source:HGNC Symbol;Acc:HGNC:18181]	9	89005771	89178767	-1
ENSG00000136811	-1.05346	6.89299	-28.6322	1.73e-18	8.54e-17	32.0709	4957	ODF2	outer dense fiber of sperm tails 2 [Source:HGNC Symbol;Acc:HGNC:8114]	9	128455186	128501292	1
ENSG00000138604	-1.31	6.3617	-28.5581	1.82e-18	8.93e-17	32.0648	26035	GLCE	glucuronic acid epimerase [Source:HGNC Symbol;Acc:HGNC:17855]	15	69160584	69272217	1
ENSG00000249491	1.7487	3.80086	28.07	2.61e-18	1.21e-16	32.0136		EGFLAM-AS1	EGFLAM antisense RNA 1 [Source:HGNC Symbol;Acc:HGNC:41169]	5	38425036	38427376	-1
ENSG00000107719	-2.74232	3.19455	-27.9187	2.92e-18	1.33e-16	31.9981	27143	PALD1	phosphatase domain containing, paladin 1 [Source:HGNC Symbol;Acc:HGNC:23530]	10	70478821	70568449	1
ENSG00000104722	-6.31132	4.64823	-27.9332	2.89e-18	1.32e-16	31.9974	4741	NEFM	neurofilament, medium polypeptide [Source:HGNC Symbol;Acc:HGNC:7734]	8	24913012	24919098	1
ENSG00000143443	1.33436	4.82057	28.2455	2.29e-18	1.09e-16	31.9881	54964	C1orf56	chromosome 1 open reading frame 56 [Source:HGNC Symbol;Acc:HGNC:26045]	1	151047740	151051986	1
ENSG00000144218	-4.10182	2.30508	-28.1977	2.37e-18	1.12e-16	31.9649	3899	AFF3	AF4/FMR2 family member 3 [Source:HGNC Symbol;Acc:HGNC:6473]	2	99545419	100142739	-1
ENSG00000273706	7.28866	0.268088	30.4203	4.9e-19	2.93e-17	31.9263	3975	LHX1	LIM homeobox 1 [Source:HGNC Symbol;Acc:HGNC:6593]	17	36936785	36944612	1
ENSG00000174804	1.53441	4.5813	28.1065	2.54e-18	1.18e-16	31.9234	8322	FZD4	frizzled class receptor 4 [Source:HGNC Symbol;Acc:HGNC:4042]	11	86945679	86955391	-1
ENSG00000171310	-1.84467	3.96583	-27.9065	2.95e-18	1.34e-16	31.9174	50515	CHST11	carbohydrate sulfotransferase 11 [Source:HGNC Symbol;Acc:HGNC:17422]	12	104455295	104762014	1
ENSG00000151617	-2.36053	3.29522	-27.7402	3.33e-18	1.49e-16	31.8618	1909	EDNRA	endothelin receptor type A [Source:HGNC Symbol;Acc:HGNC:3179]	4	147480917	147544954	1
ENSG00000139132	1.47747	5.71995	28.1509	2.46e-18	1.15e-16	31.7981	121512	FGD4	FYVE, RhoGEF and PH domain containing 4 [Source:HGNC Symbol;Acc:HGNC:19125]	12	32399529	32646050	1
ENSG00000104067	0.886121	7.76397	28.3471	2.13e-18	1.02e-16	31.7963	7082	TJP1	tight junction protein 1 [Source:HGNC Symbol;Acc:HGNC:11827]	15	29699367	29968865	-1
ENSG00000146242	-1.69428	4.35467	-27.8224	3.14e-18	1.41e-16	31.7953	7162	TPBG	trophoblast glycoprotein [Source:HGNC Symbol;Acc:HGNC:12004]	6	82363206	82370828	1
ENSG00000169860	1.42209	5.41918	28.08	2.59e-18	1.2e-16	31.7795	5028	P2RY1	purinergic receptor P2Y1 [Source:HGNC Symbol;Acc:HGNC:8539]	3	152834693	152841439	1
ENSG00000019144	1.17341	6.53777	28.2302	2.32e-18	1.1e-16	31.7772	23187 102466719	PHLDB1	pleckstrin homology like domain family B member 1 [Source:HGNC Symbol;Acc:HGNC:23697]	11	118606440	118658038	1
ENSG00000087253	2.12301	3.8656	27.7375	3.34e-18	1.49e-16	31.7624	54947	LPCAT2	lysophosphatidylcholine acyltransferase 2 [Source:HGNC Symbol;Acc:HGNC:26032]	16	55508998	55586670	1
ENSG00000156515	1.1379	7.28052	28.2529	2.28e-18	1.09e-16	31.7483	3098	HK1	hexokinase 1 [Source:HGNC Symbol;Acc:HGNC:4922]	10	69269984	69401882	1
ENSG00000259007	1.62197	4.52583	27.8615	3.05e-18	1.38e-16	31.7471		RP11-463J10.3		14	51967003	51969800	-1
ENSG00000134291	1.18917	5.83352	28.0041	2.74e-18	1.26e-16	31.6675	79022	TMEM106C	transmembrane protein 106C [Source:HGNC Symbol;Acc:HGNC:28775]	12	47963569	47968878	1
ENSG00000082397	-1.44717	4.72457	-27.7127	3.4e-18	1.52e-16	31.6433	23136	EPB41L3	erythrocyte membrane protein band 4.1 like 3 [Source:HGNC Symbol;Acc:HGNC:3380]	18	5392381	5630700	-1
ENSG00000163364	-4.50449	2.38291	-27.7772	3.24e-18	1.46e-16	31.633		LINC01116	long intergenic non-protein coding RNA 1116 [Source:HGNC Symbol;Acc:HGNC:49259]	2	176629589	176637931	-1
ENSG00000145632	2.43026	5.72846	27.8682	3.03e-18	1.38e-16	31.6098	10769	PLK2	polo like kinase 2 [Source:HGNC Symbol;Acc:HGNC:19699]	5	58453982	58460260	-1
ENSG00000154309	-1.49765	4.76939	-27.6278	3.63e-18	1.6e-16	31.5735	84976	DISP1	dispatched RND transporter family member 1 [Source:HGNC Symbol;Acc:HGNC:19711]	1	222872271	223005995	1
ENSG00000164574	1.23393	6.62684	27.9481	2.86e-18	1.31e-16	31.555	55568	GALNT10	polypeptide N-acetylgalactosaminyltransferase 10 [Source:HGNC Symbol;Acc:HGNC:19873]	5	154190730	154420984	1
ENSG00000087303	1.0443	5.83653	27.8569	3.06e-18	1.38e-16	31.552	22795	NID2	nidogen 2 [Source:HGNC Symbol;Acc:HGNC:13389]	14	52004803	52069228	-1
ENSG00000148180	1.32479	7.16207	27.9531	2.85e-18	1.31e-16	31.525	2934	GSN	gelsolin [Source:HGNC Symbol;Acc:HGNC:4620]	9	121207794	121332843	1
ENSG00000139174	-2.92094	4.20932	-27.3632	4.43e-18	1.9e-16	31.5244	144165	PRICKLE1	prickle planar cell polarity protein 1 [Source:HGNC Symbol;Acc:HGNC:17019]	12	42456754	42590355	-1
ENSG00000189221	2.61105	2.91706	27.2548	4.81e-18	2.05e-16	31.4937	4128	MAOA	monoamine oxidase A [Source:HGNC Symbol;Acc:HGNC:6833]	X	43654907	43746824	1
ENSG00000169783	-5.26598	1.90621	-28.1165	2.52e-18	1.18e-16	31.4902	84894	LINGO1	leucine rich repeat and Ig domain containing 1 [Source:HGNC Symbol;Acc:HGNC:21205]	15	77613027	77820900	-1
ENSG00000165152	-2.15012	4.3177	-27.3739	4.39e-18	1.89e-16	31.4793	84302	TMEM246	transmembrane protein 246 [Source:HGNC Symbol;Acc:HGNC:28180]	9	101473171	101533537	-1
ENSG00000171130	1.43986	5.5225	27.7062	3.42e-18	1.52e-16	31.479	155066	ATP6V0E2	ATPase H+ transporting V0 subunit e2 [Source:HGNC Symbol;Acc:HGNC:21723]	7	149872968	149880698	1
ENSG00000141576	1.2332	5.12064	27.633	3.61e-18	1.6e-16	31.4722	114804	RNF157	ring finger protein 157 [Source:HGNC Symbol;Acc:HGNC:29402]	17	76142453	76240373	-1
ENSG00000012983	1.12485	6.27158	27.7983	3.19e-18	1.44e-16	31.4659	11183	MAP4K5	mitogen-activated protein kinase kinase kinase kinase 5 [Source:HGNC Symbol;Acc:HGNC:6867]	14	50418501	50561126	-1
ENSG00000158186	-1.94742	3.44421	-27.2243	4.92e-18	2.08e-16	31.4522	22808	MRAS	muscle RAS oncogene homolog [Source:HGNC Symbol;Acc:HGNC:7227]	3	138347648	138405534	1
ENSG00000233101	-1.35345	5.71218	-27.6075	3.68e-18	1.62e-16	31.4122	404266	HOXB-AS3	HOXB cluster antisense RNA 3 [Source:HGNC Symbol;Acc:HGNC:40283]	17	48549630	48606414	1
ENSG00000196814	1.47204	5.51889	27.5642	3.81e-18	1.66e-16	31.3699	89853	MVB12B	multivesicular body subunit 12B [Source:HGNC Symbol;Acc:HGNC:23368]	9	126326849	126507041	1
ENSG00000169562	4.48741	1.89056	27.2723	4.74e-18	2.03e-16	31.3623	2705	GJB1	gap junction protein beta 1 [Source:HGNC Symbol;Acc:HGNC:4283]	X	71215194	71225516	1
ENSG00000111962	-1.96121	5.27437	-27.3154	4.59e-18	1.97e-16	31.2798	10090	UST	uronyl 2-sulfotransferase [Source:HGNC Symbol;Acc:HGNC:17223]	6	148747328	149076990	1
ENSG00000105605	-7.8992	-1.14148	-30.2031	5.69e-19	3.34e-17	31.275	59284	CACNG7	calcium voltage-gated channel auxiliary subunit gamma 7 [Source:HGNC Symbol;Acc:HGNC:13626]	19	53909335	53943941	1
ENSG00000149256	-6.62681	2.31566	-28.0057	2.74e-18	1.26e-16	31.2487	26011	TENM4	teneurin transmembrane protein 4 [Source:HGNC Symbol;Acc:HGNC:29945]	11	78652831	79440948	-1
ENSG00000128645	-8.24064	0.00437159	-29.9849	6.62e-19	3.79e-17	31.2476	3231 102465802	HOXD1	homeobox D1 [Source:HGNC Symbol;Acc:HGNC:5132]	2	176188579	176190907	1
ENSG00000183287	-8.89052	1.78792	-29.8862	7.09e-19	4.01e-17	31.2419	147372	CCBE1	collagen and calcium binding EGF domains 1 [Source:HGNC Symbol;Acc:HGNC:29426]	18	59430940	59697380	-1
ENSG00000117114	0.959735	8.25493	27.6351	3.61e-18	1.6e-16	31.2252	23266	ADGRL2	adhesion G protein-coupled receptor L2 [Source:HGNC Symbol;Acc:HGNC:18582]	1	81306160	81992436	1
ENSG00000121766	1.23211	6.39833	27.4756	4.07e-18	1.77e-16	31.2054	51538	ZCCHC17	zinc finger CCHC-type containing 17 [Source:HGNC Symbol;Acc:HGNC:30246]	1	31296982	31364953	1
ENSG00000139800	-9.86592	1.85026	-29.7978	7.54e-19	4.22e-17	31.1996	85416	ZIC5	Zic family member 5 [Source:HGNC Symbol;Acc:HGNC:20322]	13	99962964	99971909	-1
ENSG00000104687	1.10314	7.03652	27.431	4.21e-18	1.82e-16	31.1259	2936	GSR	glutathione-disulfide reductase [Source:HGNC Symbol;Acc:HGNC:4623]	8	30678061	30727926	-1
ENSG00000148200	-1.50169	4.78625	-27.0453	5.64e-18	2.37e-16	31.1165	2649	NR6A1	nuclear receptor subfamily 6 group A member 1 [Source:HGNC Symbol;Acc:HGNC:7985]	9	124517275	124771310	-1
ENSG00000283299	1.34555	7.0327	27.38	4.37e-18	1.89e-16	31.0866	2934	AL513122.1		9	121282452	121332603	1
ENSG00000283430	1.34427	7.031	27.3672	4.42e-18	1.9e-16	31.0767	2934	AL513122.2	Gelsolin [Source:UniProtKB/Swiss-Prot;Acc:P06396]	9	121300103	121332603	1
ENSG00000114790	1.32393	4.75939	27.0425	5.65e-18	2.37e-16	31.0661	26084	ARHGEF26	Rho guanine nucleotide exchange factor 26 [Source:HGNC Symbol;Acc:HGNC:24490]	3	154121003	154257827	1
ENSG00000079482	1.5683	4.17822	26.9159	6.23e-18	2.59e-16	31.0633	4983	OPHN1	oligophrenin 1 [Source:HGNC Symbol;Acc:HGNC:8148]	X	68042344	68433913	-1
ENSG00000065413	2.08158	3.31785	26.7164	7.27e-18	2.99e-16	31.035	91526	ANKRD44	ankyrin repeat domain 44 [Source:HGNC Symbol;Acc:HGNC:25259]	2	196967017	197311173	-1
ENSG00000109861	1.71875	6.80575	27.2632	4.78e-18	2.04e-16	31.0123	1075	CTSC	cathepsin C [Source:HGNC Symbol;Acc:HGNC:2528]	11	88293592	88337787	-1
ENSG00000162551	-6.92928	1.62031	-28.5562	1.83e-18	8.93e-17	30.9435	249	ALPL	alkaline phosphatase, liver/bone/kidney [Source:HGNC Symbol;Acc:HGNC:438]	1	21509372	21578412	1
ENSG00000172667	1.77102	6.21754	27.1059	5.39e-18	2.27e-16	30.939	64393	ZMAT3	zinc finger matrin-type 3 [Source:HGNC Symbol;Acc:HGNC:29983]	3	179017223	179072279	-1
ENSG00000140416	-2.32623	6.16202	-26.9705	5.98e-18	2.5e-16	30.9035	7168	TPM1	tropomyosin 1 (alpha) [Source:HGNC Symbol;Acc:HGNC:12010]	15	63042632	63071915	1
ENSG00000100625	-4.21538	2.50608	-26.6548	7.63e-18	3.11e-16	30.902	51804	SIX4	SIX homeobox 4 [Source:HGNC Symbol;Acc:HGNC:10890]	14	60709528	60724348	-1
ENSG00000116667	1.576	5.16925	26.902	6.3e-18	2.62e-16	30.8988	81563	C1orf21	chromosome 1 open reading frame 21 [Source:HGNC Symbol;Acc:HGNC:15494]	1	184387058	184629020	1
ENSG00000176595	1.15742	4.84608	26.837	6.62e-18	2.74e-16	30.8863	9920	KBTBD11	kelch repeat and BTB domain containing 11 [Source:HGNC Symbol;Acc:HGNC:29104]	8	1973878	2006936	1
ENSG00000145730	-1.16121	6.7854	-27.0786	5.5e-18	2.31e-16	30.8799	5066	PAM	peptidylglycine alpha-amidating monooxygenase [Source:HGNC Symbol;Acc:HGNC:8596]	5	102753981	103031105	1
ENSG00000155090	-2.10648	3.73544	-26.4533	8.92e-18	3.59e-16	30.8269	7071	KLF10	Kruppel like factor 10 [Source:HGNC Symbol;Acc:HGNC:11810]	8	102648779	102655902	-1
ENSG00000111696	1.64116	5.35172	26.8184	6.72e-18	2.77e-16	30.8081	51559	NT5DC3	5'-nucleotidase domain containing 3 [Source:HGNC Symbol;Acc:HGNC:30826]	12	103770453	103841197	-1
ENSG00000197892	1.50972	5.08789	26.7547	7.06e-18	2.91e-16	30.7914	23303	KIF13B	kinesin family member 13B [Source:HGNC Symbol;Acc:HGNC:14405]	8	29067279	29263124	-1
ENSG00000163071	1.96989	3.47302	26.3799	9.45e-18	3.76e-16	30.7474	132671	SPATA18	spermatogenesis associated 18 [Source:HGNC Symbol;Acc:HGNC:29579]	4	52051331	52097292	1
ENSG00000118733	-9.87198	1.90668	-28.9039	1.42e-18	7.26e-17	30.726	118427	OLFM3	olfactomedin 3 [Source:HGNC Symbol;Acc:HGNC:17990]	1	101802574	101997030	-1
ENSG00000104388	1.11207	6.78768	26.8856	6.38e-18	2.64e-16	30.7092	5862	RAB2A	RAB2A, member RAS oncogene family [Source:HGNC Symbol;Acc:HGNC:9763]	8	60516857	60623627	1
ENSG00000198879	-2.24751	3.40874	-26.2594	1.04e-17	4.07e-16	30.7086	57713	SFMBT2	Scm-like with four mbt domains 2 [Source:HGNC Symbol;Acc:HGNC:20256]	10	7158624	7411486	-1
ENSG00000196517	-2.47719	3.05267	-26.1869	1.1e-17	4.25e-16	30.6736	6536	SLC6A9	solute carrier family 6 member 9 [Source:HGNC Symbol;Acc:HGNC:11056]	1	43991500	44031467	-1
ENSG00000121210	1.07175	5.54961	26.6804	7.48e-18	3.06e-16	30.6593	23240	KIAA0922	KIAA0922 [Source:HGNC Symbol;Acc:HGNC:29146]	4	153466346	153636711	1
ENSG00000175093	-1.70064	4.46348	-26.3893	9.38e-18	3.75e-16	30.6554	92369	SPSB4	splA/ryanodine receptor domain and SOCS box containing 4 [Source:HGNC Symbol;Acc:HGNC:30630]	3	141051402	141148611	1
ENSG00000096080	1.27931	5.56674	26.6533	7.63e-18	3.11e-16	30.6388	55168	MRPS18A	mitochondrial ribosomal protein S18A [Source:HGNC Symbol;Acc:HGNC:14515]	6	43671303	43687791	-1
ENSG00000162458	-1.9606	4.06298	-26.2752	1.03e-17	4.02e-16	30.6365	54751	FBLIM1	filamin binding LIM protein 1 [Source:HGNC Symbol;Acc:HGNC:24686]	1	15756607	15786594	1
ENSG00000170571	1.1801	5.35737	26.6104	7.89e-18	3.2e-16	30.6299	133418	EMB	embigin [Source:HGNC Symbol;Acc:HGNC:30465]	5	50396192	50443248	-1
ENSG00000050030	-5.04589	1.61711	-26.9448	6.09e-18	2.54e-16	30.6122	340533	KIAA2022	KIAA2022 [Source:HGNC Symbol;Acc:HGNC:29433]	X	74732849	74925485	-1
ENSG00000168843	7.31985	1.02878	27.523	3.92e-18	1.71e-16	30.6105	56884	FSTL5	follistatin like 5 [Source:HGNC Symbol;Acc:HGNC:21386]	4	161383897	162164035	-1
ENSG00000128849	-4.89023	2.46685	-26.39	9.38e-18	3.75e-16	30.6067	84952	CGNL1	cingulin like 1 [Source:HGNC Symbol;Acc:HGNC:25931]	15	57375967	57550727	1
ENSG00000196876	-2.55071	5.25502	-26.3788	9.46e-18	3.76e-16	30.5771	6334	SCN8A	sodium voltage-gated channel alpha subunit 8 [Source:HGNC Symbol;Acc:HGNC:10596]	12	51590266	51812864	1
ENSG00000169116	-5.38381	1.37803	-27.2353	4.88e-18	2.07e-16	30.5581	25849	PARM1	prostate androgen-regulated mucin-like protein 1 [Source:HGNC Symbol;Acc:HGNC:24536]	4	74933095	75050115	1
ENSG00000170017	-1.29816	5.257	-26.3684	9.54e-18	3.77e-16	30.4902	214	ALCAM	activated leukocyte cell adhesion molecule [Source:HGNC Symbol;Acc:HGNC:400]	3	105366909	105576900	1
ENSG00000169071	-5.25639	2.54506	-26.2468	1.05e-17	4.09e-16	30.4705	4920	ROR2	receptor tyrosine kinase like orphan receptor 2 [Source:HGNC Symbol;Acc:HGNC:10257]	9	91563091	91950162	-1
ENSG00000076554	2.97138	2.45115	25.9202	1.36e-17	5.14e-16	30.4635	7163	TPD52	tumor protein D52 [Source:HGNC Symbol;Acc:HGNC:12005]	8	80034745	80231232	-1
ENSG00000113504	-5.19052	2.00943	-26.4986	8.61e-18	3.48e-16	30.4571	10723	SLC12A7	solute carrier family 12 member 7 [Source:HGNC Symbol;Acc:HGNC:10915]	5	1050376	1112035	-1
ENSG00000118971	-1.31154	9.07637	-26.674	7.51e-18	3.07e-16	30.439	894	CCND2	cyclin D2 [Source:HGNC Symbol;Acc:HGNC:1583]	12	4273772	4305350	1
ENSG00000186310	1.3332	5.36729	26.3512	9.67e-18	3.81e-16	30.4217	4675	NAP1L3	nucleosome assembly protein 1 like 3 [Source:HGNC Symbol;Acc:HGNC:7639]	X	93670930	93673568	-1
ENSG00000157557	-1.88624	5.17044	-26.2148	1.08e-17	4.18e-16	30.4124	2114	ETS2	ETS proto-oncogene 2, transcription factor [Source:HGNC Symbol;Acc:HGNC:3489]	21	38805307	38824955	1
ENSG00000168916	-1.13621	6.95561	-26.4882	8.68e-18	3.51e-16	30.3932	57507	ZNF608	zinc finger protein 608 [Source:HGNC Symbol;Acc:HGNC:29238]	5	124636913	124748807	-1
ENSG00000085276	-2.97004	2.64336	-25.8481	1.44e-17	5.42e-16	30.3914	2122	MECOM	MDS1 and EVI1 complex locus [Source:HGNC Symbol;Acc:HGNC:3498]	3	169083499	169663618	-1
ENSG00000110756	1.16348	5.9496	26.3995	9.31e-18	3.73e-16	30.3875	11234	HPS5	HPS5, biogenesis of lysosomal organelles complex 2 subunit 2 [Source:HGNC Symbol;Acc:HGNC:17022]	11	18278668	18322198	-1
ENSG00000233225	-1.49905	4.0253	-25.9861	1.29e-17	4.92e-16	30.3851		AC004987.9		7	39833571	39834718	1
ENSG00000171517	2.40707	2.75473	25.8011	1.5e-17	5.62e-16	30.3585	23566	LPAR3	lysophosphatidic acid receptor 3 [Source:HGNC Symbol;Acc:HGNC:14298]	1	84811602	84893213	-1
ENSG00000160360	1.89271	3.82445	25.9403	1.34e-17	5.08e-16	30.3419	26086	GPSM1	G-protein signaling modulator 1 [Source:HGNC Symbol;Acc:HGNC:17858]	9	136327476	136359605	1
ENSG00000264364	1.11687	7.74427	26.4807	8.73e-18	3.52e-16	30.3302	140735	DYNLL2	dynein light chain LC8-type 2 [Source:HGNC Symbol;Acc:HGNC:24596]	17	58083415	58095536	1
ENSG00000174963	-9.37058	0.916865	-28.1595	2.44e-18	1.15e-16	30.3044	84107	ZIC4	Zic family member 4 [Source:HGNC Symbol;Acc:HGNC:20393]	3	147386046	147406860	-1
ENSG00000198947	-1.18231	5.89592	-26.25	1.05e-17	4.09e-16	30.3001	1756	DMD	dystrophin [Source:HGNC Symbol;Acc:HGNC:2928]	X	31097677	33339441	-1
ENSG00000136603	1.07097	5.28051	26.1926	1.1e-17	4.24e-16	30.2998	6498	SKIL	SKI-like proto-oncogene [Source:HGNC Symbol;Acc:HGNC:10897]	3	170357678	170396835	1
ENSG00000062038	-1.67296	5.44412	-26.1409	1.14e-17	4.4e-16	30.2968	1001	CDH3	cadherin 3 [Source:HGNC Symbol;Acc:HGNC:1762]	16	68636189	68722616	1
ENSG00000278588	-1.16447	7.27587	-26.3843	9.42e-18	3.75e-16	30.2884	8346	HIST1H2BI	histone cluster 1, H2bi [Source:HGNC Symbol;Acc:HGNC:4756]	6	26272976	26273356	1
ENSG00000248265	-5.01743	2.30551	-25.9891	1.29e-17	4.91e-16	30.2372	440101	FLJ12825	uncharacterized LOC440101 [Source:EntrezGene;Acc:440101]	12	54058254	54122234	1
ENSG00000059573	1.08713	7.55184	26.3541	9.64e-18	3.8e-16	30.2368	5832	ALDH18A1	aldehyde dehydrogenase 18 family member A1 [Source:HGNC Symbol;Acc:HGNC:9722]	10	95605929	95656706	-1
ENSG00000225697	-1.20499	4.95758	-26.0044	1.27e-17	4.86e-16	30.2357	65010 102465495	SLC26A6	solute carrier family 26 member 6 [Source:HGNC Symbol;Acc:HGNC:14472]	3	48625723	48635493	-1
ENSG00000111052	-2.45781	3.51655	-25.6473	1.69e-17	6.25e-16	30.2133	8825	LIN7A	lin-7 homolog A, crumbs cell polarity complex component [Source:HGNC Symbol;Acc:HGNC:17787]	12	80792520	80937925	-1
ENSG00000066084	0.933371	7.6081	26.3163	9.93e-18	3.9e-16	30.2033	57609	DIP2B	disco interacting protein 2 homolog B [Source:HGNC Symbol;Acc:HGNC:29284]	12	50504985	50748667	1
ENSG00000107957	1.43687	5.49301	26.0894	1.19e-17	4.56e-16	30.1934	9644	SH3PXD2A	SH3 and PX domains 2A [Source:HGNC Symbol;Acc:HGNC:23664]	10	103594027	103855543	-1
ENSG00000169126	-3.27015	2.15998	-25.6546	1.68e-17	6.22e-16	30.1616	55130	ARMC4	armadillo repeat containing 4 [Source:HGNC Symbol;Acc:HGNC:25583]	10	27812164	27999048	-1
ENSG00000180801	1.52212	4.77231	25.9148	1.37e-17	5.15e-16	30.1589	79642	ARSJ	arylsulfatase family member J [Source:HGNC Symbol;Acc:HGNC:26286]	4	113900284	113979727	-1
ENSG00000114547	3.68067	1.17945	25.7927	1.51e-17	5.65e-16	30.1517	152015	ROPN1B	rhophilin associated tail protein 1B [Source:HGNC Symbol;Acc:HGNC:31927]	3	125969144	125983454	1
ENSG00000124766	1.09081	6.32893	26.1394	1.14e-17	4.4e-16	30.1386	6659	SOX4	SRY-box 4 [Source:HGNC Symbol;Acc:HGNC:11200]	6	21592768	21598619	1
ENSG00000248890	-2.39821	3.21285	-25.5252	1.87e-17	6.87e-16	30.1346	646576	HHIP-AS1	HHIP antisense RNA 1 [Source:HGNC Symbol;Acc:HGNC:44182]	4	144642922	144661357	-1
ENSG00000170989	-5.04535	2.11637	-25.9453	1.33e-17	5.07e-16	30.1324	1901	S1PR1	sphingosine-1-phosphate receptor 1 [Source:HGNC Symbol;Acc:HGNC:3165]	1	101236888	101241518	1
ENSG00000249910	5.54013	0.977926	26.0512	1.22e-17	4.7e-16	30.0179		TRIM51CP	tripartite motif-containing 51C, pseudogene [Source:HGNC Symbol;Acc:HGNC:43968]	11	48945694	48951895	1
ENSG00000283266	2.31711	2.4584	25.3379	2.17e-17	7.89e-16	29.9939	57698	AC023283.1	Shootin-1 [Source:UniProtKB/Swiss-Prot;Acc:A0MZ66]	10	116900537	116960222	-1
ENSG00000145911	-4.07729	2.40717	-25.4568	1.97e-17	7.24e-16	29.9845	23138	N4BP3	NEDD4 binding protein 3 [Source:HGNC Symbol;Acc:HGNC:29852]	5	178113443	178126087	1
ENSG00000147852	-1.32674	4.7596	-25.633	1.71e-17	6.31e-16	29.9679	7436	VLDLR	very low density lipoprotein receptor [Source:HGNC Symbol;Acc:HGNC:12698]	9	2621834	2660053	1
ENSG00000137473	-9.72533	0.174108	-27.5667	3.8e-18	1.66e-16	29.9559	83894	TTC29	tetratricopeptide repeat domain 29 [Source:HGNC Symbol;Acc:HGNC:29936]	4	146706638	146945882	-1
ENSG00000156475	2.55142	2.35451	25.2634	2.31e-17	8.33e-16	29.9354	5521	PPP2R2B	protein phosphatase 2 regulatory subunit Bbeta [Source:HGNC Symbol;Acc:HGNC:9305]	5	146581146	147084784	-1
ENSG00000132763	-1.18385	6.99107	-25.9207	1.36e-17	5.14e-16	29.9265	25974	MMACHC	methylmalonic aciduria (cobalamin deficiency) cblC type, with homocystinuria [Source:HGNC Symbol;Acc:HGNC:24525]	1	45500053	45513382	1
ENSG00000131149	1.16904	5.03321	25.6901	1.63e-17	6.09e-16	29.9237	23199	GSE1	Gse1 coiled-coil protein [Source:HGNC Symbol;Acc:HGNC:28979]	16	85169525	85676204	1
ENSG00000170542	5.15377	1.1621	25.6643	1.67e-17	6.2e-16	29.8825	5272	SERPINB9	serpin family B member 9 [Source:HGNC Symbol;Acc:HGNC:8955]	6	2887266	2903280	-1
ENSG00000168758	0.983432	6.44926	25.7801	1.52e-17	5.69e-16	29.831	54910	SEMA4C	semaphorin 4C [Source:HGNC Symbol;Acc:HGNC:10731]	2	96859716	96870757	-1
ENSG00000164116	-6.56185	-0.271539	-27.4636	4.1e-18	1.78e-16	29.8214	2982	GUCY1A3	guanylate cyclase 1 soluble subunit alpha [Source:HGNC Symbol;Acc:HGNC:4685]	4	155666711	155732349	1
ENSG00000170178	-6.9955	-1.63486	-27.6119	3.67e-18	1.62e-16	29.7912	3238	HOXD12	homeobox D12 [Source:HGNC Symbol;Acc:HGNC:5135]	2	176099730	176101193	1
ENSG00000130052	-3.09733	2.93637	-25.0649	2.72e-17	9.61e-16	29.7726	9754	STARD8	StAR related lipid transfer domain containing 8 [Source:HGNC Symbol;Acc:HGNC:19161]	X	68647666	68725842	1
ENSG00000162946	1.51907	4.8541	25.4498	1.98e-17	7.26e-16	29.7593	27185	DISC1	disrupted in schizophrenia 1 [Source:HGNC Symbol;Acc:HGNC:2888]	1	231626815	232041272	1
ENSG00000184160	-6.18179	3.12595	-25.2355	2.36e-17	8.49e-16	29.7331	152	ADRA2C	adrenoceptor alpha 2C [Source:HGNC Symbol;Acc:HGNC:283]	4	3766348	3768526	1
ENSG00000134532	1.09885	6.74291	25.6722	1.66e-17	6.17e-16	29.7204	6660	SOX5	SRY-box 5 [Source:HGNC Symbol;Acc:HGNC:11201]	12	23529500	23951032	-1
ENSG00000127946	-0.966259	7.03825	-25.6566	1.68e-17	6.22e-16	29.7001	3092	HIP1	huntingtin interacting protein 1 [Source:HGNC Symbol;Acc:HGNC:4913]	7	75533300	75738962	-1
ENSG00000142089	-1.12239	5.23628	-25.4008	2.07e-17	7.54e-16	29.686	10410	IFITM3	interferon induced transmembrane protein 3 [Source:HGNC Symbol;Acc:HGNC:5414]	11	319669	327537	-1
ENSG00000109458	0.947712	5.34703	25.4489	1.99e-17	7.26e-16	29.6724	2549	GAB1	GRB2 associated binding protein 1 [Source:HGNC Symbol;Acc:HGNC:4066]	4	143336762	143474568	1
ENSG00000276707	6.11697	-2.667	27.1504	5.21e-18	2.2e-16	29.6508		RP11-445F12.2		17	36940049	36943456	-1
ENSG00000113721	-2.53907	3.71454	-24.975	2.93e-17	1.02e-15	29.6408	5159	PDGFRB	platelet derived growth factor receptor beta [Source:HGNC Symbol;Acc:HGNC:8804]	5	150113837	150155872	-1
ENSG00000162706	2.52521	3.10847	24.9589	2.97e-17	1.03e-15	29.6401	57863	CADM3	cell adhesion molecule 3 [Source:HGNC Symbol;Acc:HGNC:17601]	1	159171609	159203313	1
ENSG00000134909	-1.41636	5.46114	-25.3646	2.13e-17	7.73e-16	29.6358	9743	ARHGAP32	Rho GTPase activating protein 32 [Source:HGNC Symbol;Acc:HGNC:17399]	11	128965060	129279324	-1
ENSG00000126705	-2.34784	4.01922	-25.0152	2.83e-17	9.94e-16	29.6265	27245	AHDC1	AT-hook DNA binding motif containing 1 [Source:HGNC Symbol;Acc:HGNC:25230]	1	27534035	27604431	-1
ENSG00000174307	2.36663	4.17606	25.0964	2.65e-17	9.4e-16	29.6031	23612	PHLDA3	pleckstrin homology like domain family A member 3 [Source:HGNC Symbol;Acc:HGNC:8934]	1	201464383	201469237	-1
ENSG00000158301	-1.40649	4.36379	-25.1037	2.63e-17	9.36e-16	29.5947	114928 100528062	GPRASP2	G protein-coupled receptor associated sorting protein 2 [Source:HGNC Symbol;Acc:HGNC:25169]	X	102712176	102717733	1
ENSG00000155966	-1.93303	4.14696	-25.0282	2.8e-17	9.86e-16	29.5947	2334	AFF2	AF4/FMR2 family member 2 [Source:HGNC Symbol;Acc:HGNC:3776]	X	148500619	149000663	1
ENSG00000247809	2.33866	2.91696	24.8834	3.16e-17	1.09e-15	29.5909	644192	NR2F2-AS1	NR2F2 antisense RNA 1 [Source:HGNC Symbol;Acc:HGNC:44222]	15	96110040	96327361	-1
ENSG00000256673	3.69011	1.71931	24.8969	3.12e-17	1.08e-15	29.5712		RP11-599J14.2		12	9398355	9414851	-1
ENSG00000047617	-4.50104	1.94313	-25.1369	2.56e-17	9.12e-16	29.5616	57101	ANO2	anoctamin 2 [Source:HGNC Symbol;Acc:HGNC:1183]	12	5531869	5946232	-1
ENSG00000112319	-3.24832	3.94439	-24.8203	3.33e-17	1.14e-15	29.5197	2070	EYA4	EYA transcriptional coactivator and phosphatase 4 [Source:HGNC Symbol;Acc:HGNC:3522]	6	133240598	133532120	1
ENSG00000078018	-1.65676	6.59379	-25.3776	2.1e-17	7.67e-16	29.5178	4133	MAP2	microtubule associated protein 2 [Source:HGNC Symbol;Acc:HGNC:6839]	2	209424058	209734118	1
ENSG00000058668	-2.10943	5.75347	-25.2097	2.41e-17	8.64e-16	29.5024	493	ATP2B4	ATPase plasma membrane Ca2+ transporting 4 [Source:HGNC Symbol;Acc:HGNC:817]	1	203626561	203744081	1
ENSG00000158528	-1.77263	4.40115	-24.9601	2.96e-17	1.03e-15	29.4875	55607	PPP1R9A	protein phosphatase 1 regulatory subunit 9A [Source:HGNC Symbol;Acc:HGNC:14946]	7	94907202	95296415	1
ENSG00000242779	-2.08642	3.73059	-24.8071	3.36e-17	1.15e-15	29.4751	79986	ZNF702P	zinc finger protein 702, pseudogene [Source:HGNC Symbol;Acc:HGNC:25775]	19	52968251	53037898	-1
ENSG00000105559	1.63035	5.88947	25.2738	2.29e-17	8.28e-16	29.4695	57664	PLEKHA4	pleckstrin homology domain containing A4 [Source:HGNC Symbol;Acc:HGNC:14339]	19	48837097	48868632	-1
ENSG00000144199	1.94602	3.65022	24.8471	3.25e-17	1.12e-15	29.459	151313	FAHD2B	fumarylacetoacetate hydrolase domain containing 2B [Source:HGNC Symbol;Acc:HGNC:25318]	2	97083583	97094882	-1
ENSG00000100505	1.19493	6.33197	25.2916	2.26e-17	8.17e-16	29.4324	114088	TRIM9	tripartite motif containing 9 [Source:HGNC Symbol;Acc:HGNC:16288]	14	50975262	51096061	-1
ENSG00000043355	-9.76911	1.8561	-26.6095	7.9e-18	3.2e-16	29.4035	7546	ZIC2	Zic family member 2 [Source:HGNC Symbol;Acc:HGNC:12873]	13	99981772	99986773	1
ENSG00000135454	-2.36446	3.16373	-24.5987	4e-17	1.33e-15	29.3686	2583	B4GALNT1	beta-1,4-N-acetyl-galactosaminyltransferase 1 [Source:HGNC Symbol;Acc:HGNC:4117]	12	57623410	57633355	-1
ENSG00000198598	3.43543	3.10511	24.5911	4.03e-17	1.33e-15	29.3549	4326	MMP17	matrix metallopeptidase 17 [Source:HGNC Symbol;Acc:HGNC:7163]	12	131828393	131851783	1
ENSG00000144369	-1.35927	5.22255	-24.9716	2.94e-17	1.02e-15	29.3363	165215	FAM171B	family with sequence similarity 171 member B [Source:HGNC Symbol;Acc:HGNC:29412]	2	186693971	186765965	1
ENSG00000060718	-0.921168	7.64297	-25.2594	2.32e-17	8.34e-16	29.3304	1301	COL11A1	collagen type XI alpha 1 chain [Source:HGNC Symbol;Acc:HGNC:2186]	1	102876467	103108496	-1
ENSG00000224189	-7.55876	1.74009	-26.1968	1.09e-17	4.24e-16	29.3291	401022	HAGLR	HOXD antisense growth-associated long non-coding RNA [Source:HGNC Symbol;Acc:HGNC:43755]	2	176173195	176188958	-1
ENSG00000074964	-1.71208	4.02638	-24.7063	3.66e-17	1.23e-15	29.3277	55160	ARHGEF10L	Rho guanine nucleotide exchange factor 10 like [Source:HGNC Symbol;Acc:HGNC:25540]	1	17539835	17697874	1
ENSG00000101577	-1.12027	5.57462	-25.0331	2.79e-17	9.84e-16	29.3239	9663	LPIN2	lipin 2 [Source:HGNC Symbol;Acc:HGNC:14450]	18	2916994	3013315	-1
ENSG00000186635	1.27723	5.25196	24.9904	2.89e-17	1.01e-15	29.3029	116985	ARAP1	ArfGAP with RhoGAP domain, ankyrin repeat and PH domain 1 [Source:HGNC Symbol;Acc:HGNC:16925]	11	72685069	72793599	-1
ENSG00000133169	-1.9196	3.65494	-24.5949	4.02e-17	1.33e-15	29.2963	55859	BEX1	brain expressed X-linked 1 [Source:HGNC Symbol;Acc:HGNC:1036]	X	103062651	103064240	-1
ENSG00000275342	1.7832	4.41366	24.8072	3.36e-17	1.15e-15	29.2957	157285	SGK223	Tyrosine-protein kinase SgK223 [Source:UniProtKB/Swiss-Prot;Acc:Q86YV5]	8	8317736	8386498	-1
ENSG00000145703	-3.0414	4.1585	-24.5566	4.15e-17	1.36e-15	29.258	10788	IQGAP2	IQ motif containing GTPase activating protein 2 [Source:HGNC Symbol;Acc:HGNC:6111]	5	76403249	76708132	1
ENSG00000171766	1.51431	3.8936	24.6458	3.85e-17	1.28e-15	29.2371	2628	GATM	glycine amidinotransferase [Source:HGNC Symbol;Acc:HGNC:4175]	15	45361124	45402327	-1
ENSG00000139880	-2.4331	3.72342	-24.506	4.33e-17	1.42e-15	29.2368	64403	CDH24	cadherin 24 [Source:HGNC Symbol;Acc:HGNC:14265]	14	23047062	23057538	-1
ENSG00000106004	-1.48416	4.37284	-24.6628	3.79e-17	1.27e-15	29.2215	3202	HOXA5	homeobox A5 [Source:HGNC Symbol;Acc:HGNC:5106]	7	27141052	27143668	-1
ENSG00000075391	1.15679	6.10026	25.0142	2.83e-17	9.94e-16	29.2171	9462	RASAL2	RAS protein activator like 2 [Source:HGNC Symbol;Acc:HGNC:9874]	1	178094141	178484147	1
ENSG00000178764	-2.12135	3.42835	-24.4443	4.56e-17	1.48e-15	29.2043	22882	ZHX2	zinc fingers and homeoboxes 2 [Source:HGNC Symbol;Acc:HGNC:18513]	8	122781394	122974512	1
ENSG00000158079	-1.29298	4.92046	-24.7622	3.49e-17	1.18e-15	29.2029	138639	PTPDC1	protein tyrosine phosphatase domain containing 1 [Source:HGNC Symbol;Acc:HGNC:30184]	9	94030794	94109856	1
ENSG00000175928	-4.74195	3.40807	-24.3851	4.79e-17	1.54e-15	29.2013	57633	LRRN1	leucine rich repeat neuronal 1 [Source:HGNC Symbol;Acc:HGNC:20980]	3	3799437	3847703	1
ENSG00000166007	6.1281	-2.66311	26.3755	9.48e-18	3.76e-16	29.1867		TRIM51HP	tripartite motif-containing 51H, pseudogene [Source:HGNC Symbol;Acc:HGNC:43977]	11	55291883	55298270	-1
ENSG00000164418	6.30291	1.4639	24.7992	3.39e-17	1.15e-15	29.1716	2898	GRIK2	glutamate ionotropic receptor kainate type subunit 2 [Source:HGNC Symbol;Acc:HGNC:4580]	6	101398788	102070083	1
ENSG00000166147	-0.825151	7.54645	-25.0656	2.72e-17	9.61e-16	29.1695	2200	FBN1	fibrillin 1 [Source:HGNC Symbol;Acc:HGNC:3603]	15	48408306	48645849	-1
ENSG00000134780	1.75412	3.83172	24.5297	4.24e-17	1.39e-15	29.1534	747	DAGLA	diacylglycerol lipase alpha [Source:HGNC Symbol;Acc:HGNC:1165]	11	61680433	61747001	1
ENSG00000198846	4.43608	1.15514	24.5937	4.02e-17	1.33e-15	29.1512	9760	TOX	thymocyte selection associated high mobility group box [Source:HGNC Symbol;Acc:HGNC:18988]	8	58805418	59119208	-1
ENSG00000023902	0.860321	6.19947	24.9516	2.98e-17	1.03e-15	29.1509	51177	PLEKHO1	pleckstrin homology domain containing O1 [Source:HGNC Symbol;Acc:HGNC:24310]	1	150149183	150164720	1
ENSG00000151967	1.21629	5.12458	24.7864	3.42e-17	1.16e-15	29.1457	29970	SCHIP1	schwannomin interacting protein 1 [Source:HGNC Symbol;Acc:HGNC:15678]	3	159839861	159897360	1
ENSG00000102606	0.906394	6.3312	24.9535	2.98e-17	1.03e-15	29.1415	8874	ARHGEF7	Rho guanine nucleotide exchange factor 7 [Source:HGNC Symbol;Acc:HGNC:15607]	13	111114559	111305737	1
ENSG00000145087	-2.43573	2.82973	-24.3001	5.15e-17	1.64e-15	29.1337	9515	STXBP5L	syntaxin binding protein 5 like [Source:HGNC Symbol;Acc:HGNC:30757]	3	120908072	121424761	1
ENSG00000082512	-2.07792	3.7586	-24.3923	4.76e-17	1.53e-15	29.1167	7188	TRAF5	TNF receptor associated factor 5 [Source:HGNC Symbol;Acc:HGNC:12035]	1	211326615	211374946	1
ENSG00000089472	-1.57887	4.26191	-24.4623	4.49e-17	1.46e-15	29.0724	9843	HEPH	hephaestin [Source:HGNC Symbol;Acc:HGNC:4866]	X	66162549	66268867	1
ENSG00000176788	-1.1487	5.56417	-24.7261	3.6e-17	1.22e-15	29.0632	10409	BASP1	brain abundant membrane attached signal protein 1 [Source:HGNC Symbol;Acc:HGNC:957]	5	17065598	17276843	1
ENSG00000113580	-1.54177	4.20624	-24.4426	4.56e-17	1.48e-15	29.0622	2908	NR3C1	nuclear receptor subfamily 3 group C member 1 [Source:HGNC Symbol;Acc:HGNC:7978]	5	143277931	143435512	-1
ENSG00000234857	-0.903937	6.88886	-24.891	3.14e-17	1.08e-15	29.0596		HNRNPUL2-BSCL2	HNRNPUL2-BSCL2 readthrough (NMD candidate) [Source:HGNC Symbol;Acc:HGNC:49189]	11	62690275	62727384	-1
ENSG00000162772	1.24012	5.16946	24.6871	3.72e-17	1.25e-15	29.0537	467	ATF3	activating transcription factor 3 [Source:HGNC Symbol;Acc:HGNC:785]	1	212565334	212620777	1
ENSG00000258525	2.49192	2.24805	24.1954	5.63e-17	1.77e-15	29.0475	100506071	RP11-829H16.3		14	30876179	30889808	-1
ENSG00000007062	-6.9638	2.28113	-24.9525	2.98e-17	1.03e-15	29.0341	8842	PROM1	prominin 1 [Source:HGNC Symbol;Acc:HGNC:9454]	4	15963076	16084378	-1
ENSG00000148426	3.74423	1.86909	24.1846	5.68e-17	1.78e-15	29.0058	254427	PROSER2	proline and serine rich 2 [Source:HGNC Symbol;Acc:HGNC:23728]	10	11823339	11872277	1
ENSG00000140961	3.93481	1.44015	24.2704	5.28e-17	1.67e-15	29.0039	29948	OSGIN1	oxidative stress induced growth inhibitor 1 [Source:HGNC Symbol;Acc:HGNC:30093]	16	83948282	83966332	1
ENSG00000106333	-2.55803	3.66878	-24.19	5.65e-17	1.77e-15	28.978	5118	PCOLCE	procollagen C-endopeptidase enhancer [Source:HGNC Symbol;Acc:HGNC:8738]	7	100602177	100608175	1
ENSG00000109586	-1.31409	5.32666	-24.5681	4.11e-17	1.35e-15	28.97	51809	GALNT7	polypeptide N-acetylgalactosaminyltransferase 7 [Source:HGNC Symbol;Acc:HGNC:4129]	4	173168753	173323967	1
ENSG00000137142	-4.59376	1.86357	-24.3922	4.76e-17	1.53e-15	28.945	347252	IGFBPL1	insulin like growth factor binding protein like 1 [Source:HGNC Symbol;Acc:HGNC:20081]	9	38408994	38424447	-1
ENSG00000114200	1.06555	6.59174	24.7312	3.58e-17	1.21e-15	28.9307	590	BCHE	butyrylcholinesterase [Source:HGNC Symbol;Acc:HGNC:983]	3	165772904	165837472	-1
ENSG00000132639	1.54682	4.42	24.3706	4.85e-17	1.55e-15	28.9101	6616	SNAP25	synaptosome associated protein 25 [Source:HGNC Symbol;Acc:HGNC:11132]	20	10218830	10307418	1
ENSG00000170558	1.20825	7.81731	24.7654	3.48e-17	1.18e-15	28.8888	1000	CDH2	cadherin 2 [Source:HGNC Symbol;Acc:HGNC:1759]	18	27950966	28177446	-1
ENSG00000109756	0.976678	6.10124	24.6236	3.92e-17	1.3e-15	28.878	9693	RAPGEF2	Rap guanine nucleotide exchange factor 2 [Source:HGNC Symbol;Acc:HGNC:16854]	4	159104178	159360169	1
ENSG00000117643	-2.55676	3.68647	-24.0768	6.22e-17	1.92e-15	28.877	57134	MAN1C1	mannosidase alpha class 1C member 1 [Source:HGNC Symbol;Acc:HGNC:19080]	1	25617468	25786207	1
ENSG00000255690	-1.62176	6.83315	-24.6307	3.9e-17	1.3e-15	28.8548	9865	TRIL	TLR4 interactor with leucine rich repeats [Source:HGNC Symbol;Acc:HGNC:22200]	7	28953358	28958292	-1
ENSG00000185742	-8.61669	-0.284108	-25.7754	1.53e-17	5.7e-16	28.8409	399947	C11orf87	chromosome 11 open reading frame 87 [Source:HGNC Symbol;Acc:HGNC:33788]	11	109422120	109429114	1
ENSG00000031081	-1.77118	4.56779	-24.2253	5.48e-17	1.73e-15	28.8258	57514	ARHGAP31	Rho GTPase activating protein 31 [Source:HGNC Symbol;Acc:HGNC:29216]	3	119294373	119420714	1
ENSG00000136869	-3.58886	3.09093	-23.9233	7.1e-17	2.13e-15	28.8161	7099	TLR4	toll like receptor 4 [Source:HGNC Symbol;Acc:HGNC:11850]	9	117704332	117716871	1
ENSG00000162599	-3.43304	2.05589	-24.0048	6.62e-17	2.02e-15	28.8097	4774	NFIA	nuclear factor I A [Source:HGNC Symbol;Acc:HGNC:7784]	1	60865259	61462793	1
ENSG00000164172	1.33753	5.00893	24.3752	4.83e-17	1.55e-15	28.8097	4338	MOCS2	molybdenum cofactor synthesis 2 [Source:HGNC Symbol;Acc:HGNC:7193]	5	53095679	53110063	-1
ENSG00000144730	-2.89854	6.33534	-24.4358	4.59e-17	1.49e-15	28.8029	54756	IL17RD	interleukin 17 receptor D [Source:HGNC Symbol;Acc:HGNC:17616]	3	57089982	57170306	-1
ENSG00000134013	-1.97873	5.80378	-24.4084	4.7e-17	1.52e-15	28.7971	4017	LOXL2	lysyl oxidase like 2 [Source:HGNC Symbol;Acc:HGNC:6666]	8	23297189	23425328	-1
ENSG00000114021	1.21633	4.80084	24.3192	5.06e-17	1.62e-15	28.7921	56954	NIT2	nitrilase family member 2 [Source:HGNC Symbol;Acc:HGNC:29878]	3	100334701	100361635	1
ENSG00000232973	-5.15785	2.52998	-24.0645	6.29e-17	1.93e-15	28.7871	285154	CYP1B1-AS1	CYP1B1 antisense RNA 1 [Source:HGNC Symbol;Acc:HGNC:28543]	2	38073447	38231651	1
ENSG00000102034	3.08401	1.56203	23.9293	7.06e-17	2.12e-15	28.7805	2000	ELF4	E74 like ETS transcription factor 4 [Source:HGNC Symbol;Acc:HGNC:3319]	X	130064874	130110716	-1
ENSG00000154928	-3.56929	2.07452	-23.9692	6.83e-17	2.07e-15	28.7735	2047	EPHB1	EPH receptor B1 [Source:HGNC Symbol;Acc:HGNC:3392]	3	134597801	135260467	1
ENSG00000088280	-1.17907	5.56321	-24.386	4.79e-17	1.54e-15	28.769	55616	ASAP3	ArfGAP with SH3 domain, ankyrin repeat and PH domain 3 [Source:HGNC Symbol;Acc:HGNC:14987]	1	23428563	23484568	-1
ENSG00000168546	3.39975	3.95869	24.0077	6.6e-17	2.02e-15	28.748	2675	GFRA2	GDNF family receptor alpha 2 [Source:HGNC Symbol;Acc:HGNC:4244]	8	21690403	21812357	-1
ENSG00000107679	1.52214	5.0711	24.2968	5.16e-17	1.64e-15	28.736	59338	PLEKHA1	pleckstrin homology domain containing A1 [Source:HGNC Symbol;Acc:HGNC:14335]	10	122374696	122442602	1
ENSG00000250482	3.98953	0.823502	24.13	5.95e-17	1.85e-15	28.7281		DUX4L51	double homeobox 4 like 51 (pseudogene) [Source:HGNC Symbol;Acc:HGNC:51810]	5	31249879	31250987	1
ENSG00000092421	-1.95542	3.1259	-23.8604	7.49e-17	2.24e-15	28.7248	57556	SEMA6A	semaphorin 6A [Source:HGNC Symbol;Acc:HGNC:10738]	5	116443616	116574934	-1
ENSG00000243156	1.26892	6.1089	24.436	4.59e-17	1.49e-15	28.7176	57553	MICAL3	microtubule associated monooxygenase, calponin and LIM domain containing 3 [Source:HGNC Symbol;Acc:HGNC:24694]	22	17787649	18024559	-1
ENSG00000118298	-1.76336	4.10197	-24.0049	6.62e-17	2.02e-15	28.71	23632	CA14	carbonic anhydrase 14 [Source:HGNC Symbol;Acc:HGNC:1372]	1	150257159	150265078	1
ENSG00000283224	2.10325	3.04494	23.8672	7.45e-17	2.23e-15	28.7006	91526	AC013264.1	Serine/threonine-protein phosphatase 6 regulatory ankyrin repeat subunit B [Source:UniProtKB/Swiss-Prot;Acc:Q8N8A2]	2	196989591	197310604	-1
ENSG00000135070	-1.55412	4.16519	-23.9307	7.05e-17	2.12e-15	28.6223	81689	ISCA1	iron-sulfur cluster assembly 1 [Source:HGNC Symbol;Acc:HGNC:28660]	9	86264546	86283102	-1
ENSG00000198399	1.42192	4.56014	24.0637	6.29e-17	1.93e-15	28.6132	50618	ITSN2	intersectin 2 [Source:HGNC Symbol;Acc:HGNC:6184]	2	24202864	24360714	-1
ENSG00000092607	-4.00543	1.98536	-23.8405	7.62e-17	2.26e-15	28.6101	6913	TBX15	T-box 15 [Source:HGNC Symbol;Acc:HGNC:11594]	1	118883046	118989556	-1
ENSG00000093100	1.59125	4.17013	23.9713	6.81e-17	2.07e-15	28.6041		XXbac-B461K10.4		22	17787652	17811497	-1
ENSG00000189058	6.835	-2.0769	25.1818	2.47e-17	8.82e-16	28.6028	347	APOD	apolipoprotein D [Source:HGNC Symbol;Acc:HGNC:612]	3	195568702	195584205	-1
ENSG00000232788	2.93753	1.91602	23.669	8.84e-17	2.57e-15	28.5911		AC078883.3		2	172464262	172466022	-1
ENSG00000100889	-1.74252	3.43151	-23.756	8.2e-17	2.41e-15	28.5896	5106	PCK2	phosphoenolpyruvate carboxykinase 2, mitochondrial [Source:HGNC Symbol;Acc:HGNC:8725]	14	24094053	24110598	1
ENSG00000117298	-1.23128	5.4469	-24.1495	5.85e-17	1.83e-15	28.5807	1889	ECE1	endothelin converting enzyme 1 [Source:HGNC Symbol;Acc:HGNC:3146]	1	21217247	21345504	-1
ENSG00000197757	-1.60099	3.79297	-23.7998	7.9e-17	2.33e-15	28.5696	3223	HOXC6	homeobox C6 [Source:HGNC Symbol;Acc:HGNC:5128]	12	53990624	54030823	1
ENSG00000115339	4.77639	1.30607	23.8491	7.57e-17	2.25e-15	28.5652	2591	GALNT3	polypeptide N-acetylgalactosaminyltransferase 3 [Source:HGNC Symbol;Acc:HGNC:4125]	2	165747591	165794682	-1
ENSG00000176049	0.855829	6.41033	24.2746	5.26e-17	1.67e-15	28.5446	9832	JAKMIP2	janus kinase and microtubule interacting protein 2 [Source:HGNC Symbol;Acc:HGNC:29067]	5	147585439	147782848	-1
ENSG00000099284	-0.830555	6.6581	-24.262	5.32e-17	1.68e-15	28.5276	55506	H2AFY2	H2A histone family member Y2 [Source:HGNC Symbol;Acc:HGNC:14453]	10	70052796	70112280	1
ENSG00000173193	-1.85548	3.87753	-23.7513	8.24e-17	2.41e-15	28.5268	54625	PARP14	poly(ADP-ribose) polymerase family member 14 [Source:HGNC Symbol;Acc:HGNC:29232]	3	122680618	122730840	1
ENSG00000152377	-4.00284	2.71363	-23.562	9.71e-17	2.81e-15	28.4846	6695	SPOCK1	sparc/osteonectin, cwcv and kazal-like domains proteoglycan (testican) 1 [Source:HGNC Symbol;Acc:HGNC:11251]	5	136975298	137598379	-1
ENSG00000066739	1.02812	5.75467	24.1278	5.96e-17	1.85e-15	28.4814	55102	ATG2B	autophagy related 2B [Source:HGNC Symbol;Acc:HGNC:20187]	14	96279202	96363870	-1
ENSG00000168702	-4.51026	1.49947	-23.9346	7.03e-17	2.12e-15	28.4694	53353	LRP1B	LDL receptor related protein 1B [Source:HGNC Symbol;Acc:HGNC:6693]	2	140231423	142131701	-1
ENSG00000253877	6.35009	-2.56626	25.1669	2.5e-17	8.92e-16	28.4645	101927459	LINC01608	long intergenic non-protein coding RNA 1608 [Source:HGNC Symbol;Acc:HGNC:51662]	8	110937690	111027433	-1
ENSG00000114541	-1.50654	4.18679	-23.7563	8.2e-17	2.41e-15	28.4616	23150	FRMD4B	FERM domain containing 4B [Source:HGNC Symbol;Acc:HGNC:24886]	3	69169990	69542583	-1
ENSG00000033327	1.16359	4.95967	23.9711	6.81e-17	2.07e-15	28.4578	9846	GAB2	GRB2 associated binding protein 2 [Source:HGNC Symbol;Acc:HGNC:14458]	11	78215297	78418348	-1
ENSG00000137936	1.19369	6.05674	24.1236	5.98e-17	1.85e-15	28.4468	8412	BCAR3	breast cancer anti-estrogen resistance 3 [Source:HGNC Symbol;Acc:HGNC:973]	1	93561786	93847150	-1
ENSG00000139197	-1.21136	5.54583	-24.0025	6.63e-17	2.02e-15	28.4349	5830	PEX5	peroxisomal biogenesis factor 5 [Source:HGNC Symbol;Acc:HGNC:9719]	12	7188685	7218574	1
ENSG00000165025	1.75168	4.64943	23.8322	7.68e-17	2.27e-15	28.4022	6850	SYK	spleen associated tyrosine kinase [Source:HGNC Symbol;Acc:HGNC:11491]	9	90801787	90898549	1
ENSG00000198756	1.9413	3.30318	23.564	9.69e-17	2.81e-15	28.3938	23127	COLGALT2	collagen beta(1-O)galactosyltransferase 2 [Source:HGNC Symbol;Acc:HGNC:16790]	1	183929854	184037729	-1
ENSG00000186564	5.16608	0.857404	23.853	7.54e-17	2.24e-15	28.3805	2306	FOXD2	forkhead box D2 [Source:HGNC Symbol;Acc:HGNC:3803]	1	47436017	47440691	1
ENSG00000164292	0.904498	6.84664	24.0989	6.11e-17	1.88e-15	28.3582	22836	RHOBTB3	Rho related BTB domain containing 3 [Source:HGNC Symbol;Acc:HGNC:18757]	5	95713522	95824383	1
ENSG00000270124	6.86198	-1.15729	24.6619	3.8e-17	1.27e-15	28.3447		RP11-118F19.1		16	85580009	85583571	-1
ENSG00000138760	1.06227	7.31694	24.1017	6.09e-17	1.88e-15	28.3332	950	SCARB2	scavenger receptor class B member 2 [Source:HGNC Symbol;Acc:HGNC:1665]	4	76158737	76213893	-1
ENSG00000104356	0.92375	6.12359	23.9648	6.85e-17	2.07e-15	28.2957	10940	POP1	POP1 homolog, ribonuclease P/MRP subunit [Source:HGNC Symbol;Acc:HGNC:30129]	8	98117297	98159834	1
ENSG00000140522	6.16607	0.363605	24.2688	5.29e-17	1.67e-15	28.2801	6017	RLBP1	retinaldehyde binding protein 1 [Source:HGNC Symbol;Acc:HGNC:10024]	15	89209869	89221751	-1
ENSG00000151835	1.3079	9.45344	24.1286	5.96e-17	1.85e-15	28.2614	26278	SACS	sacsin molecular chaperone [Source:HGNC Symbol;Acc:HGNC:10519]	13	23328826	23411513	-1
ENSG00000143195	-3.86794	4.31449	-23.3713	1.15e-16	3.28e-15	28.2517	387597	ILDR2	immunoglobulin like domain containing receptor 2 [Source:HGNC Symbol;Acc:HGNC:18131]	1	166895711	166975482	-1
ENSG00000072110	-1.45062	6.84059	-23.9435	6.98e-17	2.11e-15	28.2445	87	ACTN1	actinin alpha 1 [Source:HGNC Symbol;Acc:HGNC:163]	14	68874143	68979440	-1
ENSG00000179152	1.16042	5.12381	23.7572	8.19e-17	2.41e-15	28.2406	285343	TCAIM	T-cell activation inhibitor, mitochondrial [Source:HGNC Symbol;Acc:HGNC:25241]	3	44338119	44409451	1
ENSG00000111670	1.20859	4.94557	23.7232	8.44e-17	2.46e-15	28.2397	79158	GNPTAB	N-acetylglucosamine-1-phosphate transferase alpha and beta subunits [Source:HGNC Symbol;Acc:HGNC:29670]	12	101745497	101830938	-1
ENSG00000100473	2.14407	3.33127	23.3661	1.15e-16	3.29e-15	28.2187	1690	COCH	cochlin [Source:HGNC Symbol;Acc:HGNC:2180]	14	30874514	30895065	1
ENSG00000138080	-2.0155	5.63907	-23.7153	8.5e-17	2.48e-15	28.2103	11117	EMILIN1	elastin microfibril interfacer 1 [Source:HGNC Symbol;Acc:HGNC:19880]	2	27078567	27086408	1
ENSG00000227019	7.00997	-1.21351	24.4612	4.49e-17	1.46e-15	28.206		OR7E101P	olfactory receptor family 7 subfamily E member 101 pseudogene [Source:HGNC Symbol;Acc:HGNC:15342]	13	46460609	46461121	1
ENSG00000241472	-1.333	4.17111	-23.4699	1.05e-16	3.02e-15	28.198	100506994	PTPRG-AS1	PTPRG antisense RNA 1 [Source:HGNC Symbol;Acc:HGNC:44638]	3	62260865	62369330	-1
ENSG00000214357	-2.62707	2.81092	-23.2131	1.32e-16	3.7e-15	28.1941	54492	NEURL1B	neuralized E3 ubiquitin protein ligase 1B [Source:HGNC Symbol;Acc:HGNC:35422]	5	172641266	172691540	1
ENSG00000106665	-3.0015	3.73504	-23.268	1.26e-16	3.54e-15	28.1799	7461	CLIP2	CAP-Gly domain containing linker protein 2 [Source:HGNC Symbol;Acc:HGNC:2586]	7	74289475	74405943	1
ENSG00000174136	-1.37085	5.96447	-23.7686	8.11e-17	2.39e-15	28.1764	285704	RGMB	repulsive guidance molecule family member b [Source:HGNC Symbol;Acc:HGNC:26896]	5	98768650	98798643	1
ENSG00000183048	-1.93228	3.81599	-23.3412	1.18e-16	3.35e-15	28.1742	1468	SLC25A10	solute carrier family 25 member 10 [Source:HGNC Symbol;Acc:HGNC:10980]	17	81712236	81721016	1
ENSG00000112655	-1.00987	6.67397	-23.8554	7.53e-17	2.24e-15	28.1689	5754	PTK7	protein tyrosine kinase 7 (inactive) [Source:HGNC Symbol;Acc:HGNC:9618]	6	43076268	43161719	1
ENSG00000171956	-8.27573	0.811398	-24.7069	3.66e-17	1.23e-15	28.1621	27023	FOXB1	forkhead box B1 [Source:HGNC Symbol;Acc:HGNC:3799]	15	60004222	60061730	1
ENSG00000129538	2.42716	2.29449	23.1669	1.37e-16	3.82e-15	28.152	6035	RNASE1	ribonuclease A family member 1, pancreatic [Source:HGNC Symbol;Acc:HGNC:10044]	14	20801228	20803278	-1
ENSG00000186479	-5.80589	-2.28406	-25.2133	2.41e-17	8.63e-16	28.151	401190	RGS7BP	regulator of G-protein signaling 7 binding protein [Source:HGNC Symbol;Acc:HGNC:23271]	5	64506257	64612312	1
ENSG00000117318	-6.72713	3.48775	-23.2547	1.27e-16	3.57e-15	28.1437	3399	ID3	inhibitor of DNA binding 3, HLH protein [Source:HGNC Symbol;Acc:HGNC:5362]	1	23557918	23559794	-1
ENSG00000091129	-5.83365	3.24749	-23.1899	1.35e-16	3.76e-15	28.1241	4897	NRCAM	neuronal cell adhesion molecule [Source:HGNC Symbol;Acc:HGNC:7994]	7	108147623	108456717	-1
ENSG00000107562	3.00602	1.95924	23.1215	1.43e-16	3.95e-15	28.1161	6387	CXCL12	C-X-C motif chemokine ligand 12 [Source:HGNC Symbol;Acc:HGNC:10672]	10	44370165	44386493	-1
ENSG00000155324	2.0766	2.93978	23.1863	1.35e-16	3.76e-15	28.1078	65983	GRAMD3	GRAM domain containing 3 [Source:HGNC Symbol;Acc:HGNC:24911]	5	126360132	126496494	1
ENSG00000196576	-1.1645	6.39274	-23.7461	8.27e-17	2.42e-15	28.1002	23654	PLXNB2	plexin B2 [Source:HGNC Symbol;Acc:HGNC:9104]	22	50274979	50307627	-1
ENSG00000063438	3.85542	1.61916	23.1438	1.4e-16	3.89e-15	28.092	57491	AHRR	aryl-hydrocarbon receptor repressor [Source:HGNC Symbol;Acc:HGNC:346]	5	304176	438291	1
ENSG00000169313	6.13076	-0.319991	24.2608	5.32e-17	1.68e-15	28.0902	64805	P2RY12	purinergic receptor P2Y12 [Source:HGNC Symbol;Acc:HGNC:18124]	3	151337380	151384812	-1
ENSG00000109814	1.04511	7.14554	23.8134	7.8e-17	2.31e-15	28.0855	7358	UGDH	UDP-glucose 6-dehydrogenase [Source:HGNC Symbol;Acc:HGNC:12525]	4	39498755	39528311	-1
ENSG00000135976	1.51253	5.05389	23.5294	9.99e-17	2.88e-15	28.0551	375248	ANKRD36	ankyrin repeat domain 36 [Source:HGNC Symbol;Acc:HGNC:24079]	2	97113496	97264521	1
ENSG00000162981	-4.67204	1.74855	-23.3267	1.19e-16	3.38e-15	28.0402	151354	FAM84A	family with sequence similarity 84 member A [Source:HGNC Symbol;Acc:HGNC:20743]	2	14632686	14650814	1
ENSG00000183908	-7.51417	-1.35279	-24.6564	3.81e-17	1.27e-15	28.0234	219527	LRRC55	leucine rich repeat containing 55 [Source:HGNC Symbol;Acc:HGNC:32324]	11	57181747	57191717	1
ENSG00000179820	-5.68119	0.736172	-24.2411	5.41e-17	1.71e-15	27.988	91663	MYADM	myeloid associated differentiation marker [Source:HGNC Symbol;Acc:HGNC:7544]	19	53866223	53876437	1
ENSG00000163659	1.49534	5.66152	23.5422	9.88e-17	2.85e-15	27.9778	25976	TIPARP	TCDD inducible poly(ADP-ribose) polymerase [Source:HGNC Symbol;Acc:HGNC:23696]	3	156673235	156706770	1
ENSG00000121068	8.4065	0.729702	23.9797	6.76e-17	2.06e-15	27.9527	6909	TBX2	T-box 2 [Source:HGNC Symbol;Acc:HGNC:11597]	17	61399896	61409466	1
ENSG00000177098	3.44581	1.97235	22.9398	1.68e-16	4.57e-15	27.9522	6330	SCN4B	sodium voltage-gated channel beta subunit 4 [Source:HGNC Symbol;Acc:HGNC:10592]	11	118133377	118152888	-1
ENSG00000156804	5.13662	-0.177961	23.9498	6.94e-17	2.1e-15	27.9509	114907	FBXO32	F-box protein 32 [Source:HGNC Symbol;Acc:HGNC:16731]	8	123497889	123541206	-1
ENSG00000109686	0.855519	6.98249	23.6477	9.01e-17	2.61e-15	27.9459	152503	SH3D19	SH3 domain containing 19 [Source:HGNC Symbol;Acc:HGNC:30418]	4	151102751	151325632	-1
ENSG00000128606	-1.30176	6.52279	-23.5236	1e-16	2.89e-15	27.891	10234	LRRC17	leucine rich repeat containing 17 [Source:HGNC Symbol;Acc:HGNC:16895]	7	102912991	102944949	1
ENSG00000156469	1.13213	4.91324	23.3089	1.21e-16	3.43e-15	27.869	51001	MTERF3	mitochondrial transcription termination factor 3 [Source:HGNC Symbol;Acc:HGNC:24258]	8	96239398	96261610	-1
ENSG00000174469	-6.33589	0.929479	-24.1637	5.78e-17	1.81e-15	27.8456	26047	CNTNAP2	contactin associated protein-like 2 [Source:HGNC Symbol;Acc:HGNC:13830]	7	146116002	148420998	1
ENSG00000181744	-1.0292	5.33998	-23.3108	1.21e-16	3.43e-15	27.8347	205428	C3orf58	chromosome 3 open reading frame 58 [Source:HGNC Symbol;Acc:HGNC:28490]	3	143971798	144048719	1
ENSG00000128709	-5.39454	2.00454	-23.1077	1.45e-16	3.99e-15	27.8279	3235	HOXD9	homeobox D9 [Source:HGNC Symbol;Acc:HGNC:5140]	2	176122720	176124937	1
ENSG00000148798	-2.85443	2.91124	-22.8025	1.9e-16	5.1e-15	27.8265	9118	INA	internexin neuronal intermediate filament protein alpha [Source:HGNC Symbol;Acc:HGNC:6057]	10	103277163	103290351	1
ENSG00000204767	-6.48783	-1.59411	-24.4694	4.46e-17	1.46e-15	27.8262	100131897	FAM196B	family with sequence similarity 196 member B [Source:HGNC Symbol;Acc:HGNC:37271]	5	169864264	169980740	-1
ENSG00000158859	2.6751	2.39817	22.7833	1.93e-16	5.17e-15	27.8057	9507	ADAMTS4	ADAM metallopeptidase with thrombospondin type 1 motif 4 [Source:HGNC Symbol;Acc:HGNC:220]	1	161184308	161199056	-1
ENSG00000165617	-2.00683	5.36456	-23.2133	1.32e-16	3.7e-15	27.7987	51339	DACT1	dishevelled binding antagonist of beta catenin 1 [Source:HGNC Symbol;Acc:HGNC:17748]	14	58633967	58648321	1
ENSG00000178568	5.41173	0.927011	23.1347	1.41e-16	3.91e-15	27.7972	2066	ERBB4	erb-b2 receptor tyrosine kinase 4 [Source:HGNC Symbol;Acc:HGNC:3432]	2	211375717	212538841	-1
ENSG00000204054	-3.78414	1.75078	-22.8962	1.75e-16	4.73e-15	27.7877		LINC00963	long intergenic non-protein coding RNA 963 [Source:HGNC Symbol;Acc:HGNC:48716]	9	129483451	129513686	1
ENSG00000070731	3.04484	2.26822	22.7526	1.99e-16	5.3e-15	27.7873	10610	ST6GALNAC2	ST6 N-acetylgalactosaminide alpha-2,6-sialyltransferase 2 [Source:HGNC Symbol;Acc:HGNC:10867]	17	76565379	76586956	-1
ENSG00000260423	3.88584	1.48653	22.7721	1.95e-16	5.22e-15	27.7511	101930452	RP13-735L24.1		12	9367464	9397617	1
ENSG00000125398	-1.72085	5.04089	-23.1181	1.43e-16	3.96e-15	27.7474	6662	SOX9	SRY-box 9 [Source:HGNC Symbol;Acc:HGNC:11204]	17	72121020	72126420	1
ENSG00000090776	-1.2054	5.19961	-23.1784	1.36e-16	3.78e-15	27.7452	1947	EFNB1	ephrin B1 [Source:HGNC Symbol;Acc:HGNC:3226]	X	68828997	68842147	1
ENSG00000049860	0.849813	6.43834	23.3759	1.14e-16	3.27e-15	27.7367	3074	HEXB	hexosaminidase subunit beta [Source:HGNC Symbol;Acc:HGNC:4879]	5	74640023	74722647	1
ENSG00000198133	4.51546	0.17765	23.2721	1.25e-16	3.53e-15	27.7333	161145	TMEM229B	transmembrane protein 229B [Source:HGNC Symbol;Acc:HGNC:20130]	14	67447084	67533739	-1
ENSG00000238018	1.03442	5.16883	23.1986	1.34e-16	3.73e-15	27.7251		AC093110.3		2	54661011	54680045	-1
ENSG00000133110	6.94687	1.73861	22.9438	1.68e-16	4.56e-15	27.697	10631	POSTN	periostin [Source:HGNC Symbol;Acc:HGNC:16953]	13	37562583	37598844	-1
ENSG00000260855	2.37542	2.15861	22.633	2.22e-16	5.83e-15	27.6773		RP11-439E19.10		1	246772301	246775772	1
ENSG00000114279	-6.09424	2.31658	-22.9434	1.68e-16	4.56e-15	27.6756	2257	FGF12	fibroblast growth factor 12 [Source:HGNC Symbol;Acc:HGNC:3668]	3	192139395	192767764	-1
ENSG00000255543	6.64825	-0.668466	23.6845	8.73e-17	2.54e-15	27.6687		RP11-72M10.2		11	55267408	55267636	1
ENSG00000171492	0.968836	5.5915	23.2006	1.33e-16	3.73e-15	27.6655	55144	LRRC8D	leucine rich repeat containing 8 family member D [Source:HGNC Symbol;Acc:HGNC:16992]	1	89821014	89936611	1
ENSG00000259985	1.81046	3.57098	22.8109	1.89e-16	5.07e-15	27.6654		RP11-549B18.1		18	31685655	31686823	1
ENSG00000241202	-7.48205	-1.37255	-24.1198	6e-17	1.86e-15	27.6551		ZIC4-AS1	ZIC4 antisense RNA 1 [Source:HGNC Symbol;Acc:HGNC:40920]	3	147386967	147387453	1
ENSG00000164442	1.50586	4.63834	23.0033	1.59e-16	4.36e-15	27.6449	10370	CITED2	Cbp/p300 interacting transactivator with Glu/Asp rich carboxy-terminal domain 2 [Source:HGNC Symbol;Acc:HGNC:1987]	6	139371807	139374620	-1
ENSG00000258388	0.917705	6.52306	23.2735	1.25e-16	3.53e-15	27.6367		PPT2-EGFL8	PPT2-EGFL8 readthrough (NMD candidate) [Source:HGNC Symbol;Acc:HGNC:48343]	6	32153845	32171978	1
ENSG00000198513	1.99171	3.11189	22.6658	2.15e-16	5.68e-15	27.6082	51062	ATL1	atlastin GTPase 1 [Source:HGNC Symbol;Acc:HGNC:11231]	14	50532509	50633068	1
ENSG00000147588	8.62047	-0.420325	23.5209	1.01e-16	2.89e-15	27.5964	5375	PMP2	peripheral myelin protein 2 [Source:HGNC Symbol;Acc:HGNC:9117]	8	81440326	81447523	-1
ENSG00000237380	-3.25304	2.01471	-22.5682	2.35e-16	6.14e-15	27.5853		HOXD-AS2	HOXD cluster antisense RNA 2 [Source:HGNC Symbol;Acc:HGNC:43756]	2	176121611	176137098	-1
ENSG00000137331	-4.00159	2.44711	-22.5469	2.4e-16	6.23e-15	27.5759	8870	IER3	immediate early response 3 [Source:HGNC Symbol;Acc:HGNC:5392]	6	30743199	30744554	-1
ENSG00000154319	-9.50156	-0.271024	-23.8689	7.44e-17	2.23e-15	27.5713	83648	FAM167A	family with sequence similarity 167 member A [Source:HGNC Symbol;Acc:HGNC:15549]	8	11421463	11474715	-1
ENSG00000164976	-4.14877	1.66726	-22.6672	2.15e-16	5.68e-15	27.5361	57462	KIAA1161	KIAA1161 [Source:HGNC Symbol;Acc:HGNC:19918]	9	34366670	34376853	-1
ENSG00000100167	-2.196	3.57191	-22.5595	2.37e-16	6.17e-15	27.5114	55964	2003-09-01	septin 3 [Source:HGNC Symbol;Acc:HGNC:10750]	22	41976272	41998221	1
ENSG00000168386	2.41876	3.4681	22.6022	2.28e-16	5.98e-15	27.5101	11259	FILIP1L	filamin A interacting protein 1 like [Source:HGNC Symbol;Acc:HGNC:24589]	3	99830141	100114513	-1
ENSG00000146950	1.49107	4.09968	22.7384	2.01e-16	5.36e-15	27.4965	357	SHROOM2	shroom family member 2 [Source:HGNC Symbol;Acc:HGNC:630]	X	9786456	9949443	1
ENSG00000226963	2.72846	1.73289	22.4178	2.69e-16	6.93e-15	27.4839		AC078883.4		2	172427774	172428603	-1
ENSG00000054690	1.426	4.06473	22.6692	2.14e-16	5.67e-15	27.4367	57475	PLEKHH1	pleckstrin homology, MyTH4 and FERM domain containing H1 [Source:HGNC Symbol;Acc:HGNC:17733]	14	67533301	67589612	1
ENSG00000144230	6.50605	-0.240687	23.3413	1.18e-16	3.35e-15	27.4304	2840	GPR17	G protein-coupled receptor 17 [Source:HGNC Symbol;Acc:HGNC:4471]	2	127645864	127652639	1
ENSG00000112759	-1.44188	5.03895	-22.79	1.92e-16	5.15e-15	27.4271	2030	SLC29A1	solute carrier family 29 member 1 (Augustine blood group) [Source:HGNC Symbol;Acc:HGNC:11003]	6	44219505	44234151	1
ENSG00000155254	1.29432	5.51944	22.9153	1.72e-16	4.67e-15	27.4171	83742	MARVELD1	MARVEL domain containing 1 [Source:HGNC Symbol;Acc:HGNC:28674]	10	97713173	97718152	1
ENSG00000107104	-0.934348	5.49859	-22.8745	1.78e-16	4.8e-15	27.4045	23189	KANK1	KN motif and ankyrin repeat domains 1 [Source:HGNC Symbol;Acc:HGNC:19309]	9	470291	746106	1
ENSG00000104490	0.939622	5.94495	22.959	1.65e-16	4.52e-15	27.3999	83988	NCALD	neurocalcin delta [Source:HGNC Symbol;Acc:HGNC:7655]	8	101686543	102124907	-1
ENSG00000241685	0.783182	7.24578	23.0578	1.51e-16	4.16e-15	27.3918	10552	ARPC1A	actin related protein 2/3 complex subunit 1A [Source:HGNC Symbol;Acc:HGNC:703]	7	99325898	99388164	1
ENSG00000137726	1.16061	6.10202	22.9476	1.67e-16	4.56e-15	27.3755	53826	FXYD6	FXYD domain containing ion transport regulator 6 [Source:HGNC Symbol;Acc:HGNC:4030]	11	117836976	117877486	-1
ENSG00000215835	0.845862	7.51874	23.0488	1.53e-16	4.19e-15	27.3686		RP11-9L18.2		1	166275629	166277597	-1
ENSG00000049323	-1.67133	4.26516	-22.5489	2.39e-16	6.22e-15	27.356	4052	LTBP1	latent transforming growth factor beta binding protein 1 [Source:HGNC Symbol;Acc:HGNC:6714]	2	32946972	33399509	1
ENSG00000122863	1.08445	5.58672	22.8587	1.81e-16	4.87e-15	27.3517	9469	CHST3	carbohydrate sulfotransferase 3 [Source:HGNC Symbol;Acc:HGNC:1971]	10	71964365	72013564	1
ENSG00000264151	6.63282	-1.64447	23.3451	1.17e-16	3.34e-15	27.3442	105372038	RP11-739N10.1		18	27336379	27595164	-1
ENSG00000188227	-1.88793	3.48161	-22.3593	2.84e-16	7.27e-15	27.3209	390927	ZNF793	zinc finger protein 793 [Source:HGNC Symbol;Acc:HGNC:33115]	19	37506939	37548762	1
ENSG00000150938	-1.64246	4.31514	-22.5177	2.46e-16	6.38e-15	27.3157	51232	CRIM1	cysteine rich transmembrane BMP regulator 1 [Source:HGNC Symbol;Acc:HGNC:2359]	2	36355926	36551135	1
ENSG00000169231	-1.60378	4.80851	-22.6145	2.25e-16	5.92e-15	27.3141	7059	THBS3	thrombospondin 3 [Source:HGNC Symbol;Acc:HGNC:11787]	1	155195588	155209051	-1
ENSG00000172426	1.19049	5.02648	22.7079	2.07e-16	5.5e-15	27.2963	221421	RSPH9	radial spoke head 9 homolog [Source:HGNC Symbol;Acc:HGNC:21057]	6	43645046	43672599	1
ENSG00000135362	-3.70967	1.60978	-22.3418	2.89e-16	7.37e-15	27.2861	79899	PRR5L	proline rich 5 like [Source:HGNC Symbol;Acc:HGNC:25878]	11	36296288	36465204	1
ENSG00000091490	-3.1067	3.33947	-22.2045	3.28e-16	8.22e-15	27.255	23231	SEL1L3	SEL1L family member 3 [Source:HGNC Symbol;Acc:HGNC:29108]	4	25747427	25863760	-1
ENSG00000028528	0.939572	6.76961	22.8758	1.78e-16	4.8e-15	27.2516	6642	SNX1	sorting nexin 1 [Source:HGNC Symbol;Acc:HGNC:11172]	15	64094123	64146090	1
ENSG00000142949	-1.03807	6.69518	-22.8289	1.86e-16	4.99e-15	27.2297	5792	PTPRF	protein tyrosine phosphatase, receptor type F [Source:HGNC Symbol;Acc:HGNC:9670]	1	43525187	43623666	1
ENSG00000276690	6.31669	-1.02469	23.1406	1.41e-16	3.9e-15	27.2288		SOX2OT_exon3	SOX2 overlapping transcript exon 3 [Source:RFAM;Acc:RF01953]	3	181699608	181699883	1
ENSG00000225670	2.59394	2.25002	22.0939	3.63e-16	9.02e-15	27.1802		CADM3-AS1	CADM3 antisense RNA 1 [Source:HGNC Symbol;Acc:HGNC:40812]	1	159194325	159207973	-1
ENSG00000171451	-2.82626	4.68908	-22.3512	2.86e-16	7.31e-15	27.178	92126	DSEL	dermatan sulfate epimerase-like [Source:HGNC Symbol;Acc:HGNC:18144]	18	67506582	67516980	-1
ENSG00000118762	0.848727	6.02456	22.6861	2.11e-16	5.6e-15	27.1359	5311	PKD2	polycystin 2, transient receptor potential cation channel [Source:HGNC Symbol;Acc:HGNC:9009]	4	88007668	88077777	1
ENSG00000087086	1.20361	9.77132	22.8989	1.74e-16	4.73e-15	27.132	2512	FTL	ferritin light chain [Source:HGNC Symbol;Acc:HGNC:3999]	19	48965301	48966878	1
ENSG00000134817	-6.74139	-1.45302	-23.4179	1.1e-16	3.16e-15	27.1245	187	APLNR	apelin receptor [Source:HGNC Symbol;Acc:HGNC:339]	11	57233577	57237314	-1
ENSG00000162522	-3.06994	2.06052	-22.0269	3.86e-16	9.51e-15	27.1109	57648	KIAA1522	KIAA1522 [Source:HGNC Symbol;Acc:HGNC:29301]	1	32741885	32774970	1
ENSG00000160326	-1.0949	4.65163	-22.3998	2.74e-16	7.02e-15	27.1109	11182	SLC2A6	solute carrier family 2 member 6 [Source:HGNC Symbol;Acc:HGNC:11011]	9	133471095	133479137	-1
ENSG00000160781	2.52229	2.43149	22.008	3.93e-16	9.66e-15	27.0869	79957	PAQR6	progestin and adipoQ receptor family member 6 [Source:HGNC Symbol;Acc:HGNC:30132]	1	156243321	156248117	-1
ENSG00000229044	1.3425	4.08914	22.2829	3.05e-16	7.72e-15	27.0675		RP11-266K22.2		1	31333067	31346799	-1
ENSG00000009413	0.928368	6.00972	22.601	2.28e-16	5.98e-15	27.0582	5980	REV3L	REV3 like, DNA directed polymerase zeta catalytic subunit [Source:HGNC Symbol;Acc:HGNC:9968]	6	111299028	111483715	-1
ENSG00000185920	-1.88522	4.73821	-22.2916	3.02e-16	7.67e-15	27.042	5727	PTCH1	patched 1 [Source:HGNC Symbol;Acc:HGNC:9585]	9	95442980	95517057	-1
ENSG00000157404	-2.33855	3.28986	-21.992	3.99e-16	9.79e-15	27.0254	3815	KIT	KIT proto-oncogene receptor tyrosine kinase [Source:HGNC Symbol;Acc:HGNC:6342]	4	54657918	54740715	1
ENSG00000109466	1.45544	4.10988	22.2358	3.18e-16	8.01e-15	27.0217	11275	KLHL2	kelch like family member 2 [Source:HGNC Symbol;Acc:HGNC:6353]	4	165207618	165323156	1
ENSG00000126217	1.00458	5.47566	22.4744	2.56e-16	6.61e-15	27.0052	23263	MCF2L	MCF.2 cell line derived transforming sequence like [Source:HGNC Symbol;Acc:HGNC:14576]	13	112894378	113099739	1
ENSG00000164211	-1.0408	7.5276	-22.6453	2.19e-16	5.77e-15	27.0021	134429	STARD4	StAR related lipid transfer domain containing 4 [Source:HGNC Symbol;Acc:HGNC:18058]	5	111496033	111512590	-1
ENSG00000167106	1.43625	4.3629	22.2619	3.11e-16	7.85e-15	26.999	399665	FAM102A	family with sequence similarity 102 member A [Source:HGNC Symbol;Acc:HGNC:31419]	9	127940579	127980513	-1
ENSG00000082014	-1.33105	4.43821	-22.2156	3.24e-16	8.15e-15	26.9895	6604	SMARCD3	SWI/SNF related, matrix associated, actin dependent regulator of chromatin, subfamily d, member 3 [Source:HGNC Symbol;Acc:HGNC:11108]	7	151238764	151277896	-1
ENSG00000259024	-1.58033	3.60287	-22.0345	3.83e-16	9.46e-15	26.9801	100533496	TVP23C-CDRT4	TVP23C-CDRT4 readthrough [Source:HGNC Symbol;Acc:HGNC:42961]	17	15436021	15563561	-1
ENSG00000131669	-2.38795	2.245	-21.8618	4.5e-16	1.09e-14	26.9758	4814	NINJ1	ninjurin 1 [Source:HGNC Symbol;Acc:HGNC:7824]	9	93121489	93134288	-1
ENSG00000132688	-0.81465	8.95496	-22.6902	2.1e-16	5.58e-15	26.9738	10763	NES	nestin [Source:HGNC Symbol;Acc:HGNC:7756]	1	156668763	156677397	-1
ENSG00000240963	1.57796	4.08411	22.1569	3.42e-16	8.56e-15	26.9546		RP11-518L10.5		1	244375100	244409592	-1
ENSG00000122884	-0.887999	6.51026	-22.5124	2.47e-16	6.4e-15	26.9446	5033	P4HA1	prolyl 4-hydroxylase subunit alpha 1 [Source:HGNC Symbol;Acc:HGNC:8546]	10	73007217	73096974	-1
ENSG00000071246	-1.03304	6.32672	-22.4882	2.53e-16	6.53e-15	26.9429	22846	VASH1	vasohibin 1 [Source:HGNC Symbol;Acc:HGNC:19964]	14	76762189	76783015	1
ENSG00000167528	0.970605	4.9554	22.3236	2.94e-16	7.48e-15	26.9424	121274	ZNF641	zinc finger protein 641 [Source:HGNC Symbol;Acc:HGNC:31834]	12	48337180	48351414	-1
ENSG00000073849	1.0092	5.81343	22.4195	2.69e-16	6.93e-15	26.9097	6480	ST6GAL1	ST6 beta-galactoside alpha-2,6-sialyltransferase 1 [Source:HGNC Symbol;Acc:HGNC:10860]	3	186930485	187078553	1
ENSG00000134569	-1.10877	5.28942	-22.3038	2.99e-16	7.6e-15	26.9088	4038	LRP4	LDL receptor related protein 4 [Source:HGNC Symbol;Acc:HGNC:6696]	11	46856868	46918642	-1
ENSG00000153944	-0.946256	7.66324	-22.5353	2.42e-16	6.28e-15	26.8901	124540	MSI2	musashi RNA binding protein 2 [Source:HGNC Symbol;Acc:HGNC:18585]	17	57255851	57684685	1
ENSG00000091136	0.867715	8.65894	22.567	2.35e-16	6.14e-15	26.8634	3912	LAMB1	laminin subunit beta 1 [Source:HGNC Symbol;Acc:HGNC:6486]	7	107923799	108003255	-1
ENSG00000224597	2.08058	3.22848	21.8654	4.49e-16	1.08e-14	26.8413	102724316	SVIL-AS1	SVIL antisense RNA 1 [Source:HGNC Symbol;Acc:HGNC:51219]	10	29409402	29487745	1
ENSG00000171574	-1.19456	4.69146	-22.1078	3.58e-16	8.93e-15	26.8317	201514	ZNF584	zinc finger protein 584 [Source:HGNC Symbol;Acc:HGNC:27318]	19	58401504	58418327	1
ENSG00000130413	-1.715	3.18363	-21.8048	4.75e-16	1.13e-14	26.8313	65975	STK33	serine/threonine kinase 33 [Source:HGNC Symbol;Acc:HGNC:14568]	11	8391868	8594289	-1
ENSG00000278893	-8.27352	2.19677	-22.5812	2.32e-16	6.08e-15	26.8268		RP11-229O3.1		16	64981123	64983227	-1
ENSG00000146013	3.01003	2.1197	21.6836	5.32e-16	1.25e-14	26.8058	2676	GFRA3	GDNF family receptor alpha 3 [Source:HGNC Symbol;Acc:HGNC:4245]	5	138252379	138274671	-1
ENSG00000179796	-6.91961	-0.716484	-22.8835	1.77e-16	4.78e-15	26.7958	116135	LRRC3B	leucine rich repeat containing 3B [Source:HGNC Symbol;Acc:HGNC:28105]	3	26622806	26710776	1
ENSG00000259223	-6.5985	-1.53098	-22.9827	1.62e-16	4.43e-15	26.795		RP11-82L7.4		15	60073554	60118320	-1
ENSG00000119139	-2.45117	3.80465	-21.8147	4.71e-16	1.13e-14	26.789	9414	TJP2	tight junction protein 2 [Source:HGNC Symbol;Acc:HGNC:11828]	9	69121264	69255208	1
ENSG00000175274	1.58455	4.61407	22.061	3.74e-16	9.25e-15	26.7654	9537	TP53I11	tumor protein p53 inducible protein 11 [Source:HGNC Symbol;Acc:HGNC:16842]	11	44885903	44951306	-1
ENSG00000129009	-3.72265	1.66366	-21.7387	5.05e-16	1.2e-14	26.7613	3671	ISLR	immunoglobulin superfamily containing leucine rich repeat [Source:HGNC Symbol;Acc:HGNC:6133]	15	74173671	74176872	1
ENSG00000169129	0.912879	7.61688	22.3808	2.79e-16	7.14e-15	26.7367	84632	AFAP1L2	actin filament associated protein 1 like 2 [Source:HGNC Symbol;Acc:HGNC:25901]	10	114294824	114404756	-1
ENSG00000136770	0.972867	6.1875	22.2696	3.09e-16	7.81e-15	26.7268	64215	DNAJC1	DnaJ heat shock protein family (Hsp40) member C1 [Source:HGNC Symbol;Acc:HGNC:20090]	10	21756537	22003769	-1
ENSG00000047932	0.960405	5.32486	22.1569	3.42e-16	8.56e-15	26.7243	57120	GOPC	golgi associated PDZ and coiled-coil motif containing [Source:HGNC Symbol;Acc:HGNC:17643]	6	117560269	117602542	-1
ENSG00000148204	-4.64829	2.67936	-21.6142	5.68e-16	1.32e-14	26.7227	286204	CRB2	crumbs 2, cell polarity complex component [Source:HGNC Symbol;Acc:HGNC:18688]	9	123356170	123380324	1
ENSG00000064225	1.35934	4.24237	21.9503	4.15e-16	1.01e-14	26.7219	10402	ST3GAL6	ST3 beta-galactoside alpha-2,3-sialyltransferase 6 [Source:HGNC Symbol;Acc:HGNC:18080]	3	98732236	98821201	1
ENSG00000117139	1.01884	8.40564	22.4009	2.74e-16	7.02e-15	26.7171	10765	KDM5B	lysine demethylase 5B [Source:HGNC Symbol;Acc:HGNC:18039]	1	202724491	202809470	-1
ENSG00000236581	2.87846	2.29825	21.5839	5.85e-16	1.35e-14	26.7018	100874241	STARD13-AS	STARD13 antisense RNA [Source:HGNC Symbol;Acc:HGNC:40873]	13	33180401	33281584	1
ENSG00000139433	1.07367	4.99019	22.0734	3.7e-16	9.17e-15	26.6992	51228	GLTP	glycolipid transfer protein [Source:HGNC Symbol;Acc:HGNC:24867]	12	109850943	109880488	-1
ENSG00000116984	0.839608	7.2862	22.3175	2.95e-16	7.51e-15	26.6943	4548	MTR	5-methyltetrahydrofolate-homocysteine methyltransferase [Source:HGNC Symbol;Acc:HGNC:7468]	1	236795281	236903981	1
ENSG00000168610	-0.998317	6.49567	-22.2429	3.16e-16	7.97e-15	26.6925	6774	STAT3	signal transducer and activator of transcription 3 [Source:HGNC Symbol;Acc:HGNC:11364]	17	42313324	42388568	-1
ENSG00000214796	1.20957	4.37558	21.9374	4.2e-16	1.02e-14	26.6811		RP11-480I12.5		1	202851828	202861620	-1
ENSG00000158062	-1.34174	4.88855	-21.9777	4.04e-16	9.9e-15	26.6791	91544	UBXN11	UBX domain protein 11 [Source:HGNC Symbol;Acc:HGNC:30600]	1	26281328	26318363	-1
ENSG00000128266	-3.22642	2.84102	-21.5468	6.05e-16	1.4e-14	26.6742	2781	GNAZ	G protein subunit alpha z [Source:HGNC Symbol;Acc:HGNC:4395]	22	23070361	23125037	1
ENSG00000188153	-0.937766	6.24255	-22.1565	3.42e-16	8.56e-15	26.6327	1287	COL4A5	collagen type IV alpha 5 chain [Source:HGNC Symbol;Acc:HGNC:2207]	X	108439844	108697545	1
ENSG00000103647	1.47552	3.94649	21.7935	4.8e-16	1.14e-14	26.6288	10391	CORO2B	coronin 2B [Source:HGNC Symbol;Acc:HGNC:2256]	15	68578969	68727806	1
ENSG00000147862	1.2888	3.82161	21.7696	4.91e-16	1.17e-14	26.6249	4781	NFIB	nuclear factor I B [Source:HGNC Symbol;Acc:HGNC:7785]	9	14081843	14398983	-1
ENSG00000131724	-1.17573	5.01028	-21.9494	4.15e-16	1.01e-14	26.6206	3597	IL13RA1	interleukin 13 receptor subunit alpha 1 [Source:HGNC Symbol;Acc:HGNC:5974]	X	118727572	118794539	1
ENSG00000124006	-1.08866	5.46207	-22.008	3.93e-16	9.66e-15	26.5972	23363	OBSL1	obscurin like 1 [Source:HGNC Symbol;Acc:HGNC:29092]	2	219550729	219571859	-1
ENSG00000283143	-2.56701	3.18024	-21.4917	6.38e-16	1.46e-14	26.5718		AL358113.1	Tight junction protein ZO-2 [Source:UniProtKB/Swiss-Prot;Acc:Q9UDY2]	9	69174373	69248326	1
ENSG00000011028	-1.66043	5.0083	-21.8584	4.52e-16	1.09e-14	26.5623	9902	MRC2	mannose receptor C type 2 [Source:HGNC Symbol;Acc:HGNC:16875]	17	62627401	62693597	1
ENSG00000186591	0.823718	6.23453	22.0948	3.63e-16	9.02e-15	26.5538	7328	UBE2H	ubiquitin conjugating enzyme E2 H [Source:HGNC Symbol;Acc:HGNC:12484]	7	129830732	129952949	-1
ENSG00000130340	-0.974527	5.20223	-21.9175	4.27e-16	1.04e-14	26.5462	51429	SNX9	sorting nexin 9 [Source:HGNC Symbol;Acc:HGNC:14973]	6	157700387	157945077	1
ENSG00000005102	-4.24414	1.78484	-21.5258	6.18e-16	1.42e-14	26.5453	4222	MEOX1	mesenchyme homeobox 1 [Source:HGNC Symbol;Acc:HGNC:7013]	17	43640388	43661954	-1
ENSG00000091436	0.894809	6.04762	22.0563	3.76e-16	9.28e-15	26.5354	51776	AC013461.1	Mitogen-activated protein kinase kinase kinase MLT [Source:UniProtKB/Swiss-Prot;Acc:Q9NYL2]	2	173075435	173268010	1
ENSG00000077264	-4.558	1.44801	-21.632	5.59e-16	1.31e-14	26.5238	5063	PAK3	p21 (RAC1) activated kinase 3 [Source:HGNC Symbol;Acc:HGNC:8592]	X	110944285	111227361	1
ENSG00000072071	-1.25615	5.13464	-21.8668	4.48e-16	1.08e-14	26.5235	22859	ADGRL1	adhesion G protein-coupled receptor L1 [Source:HGNC Symbol;Acc:HGNC:20973]	19	14147743	14206187	-1
ENSG00000106714	-4.00207	2.12244	-21.4224	6.81e-16	1.55e-14	26.5212	79937	CNTNAP3	contactin associated protein-like 3 [Source:HGNC Symbol;Acc:HGNC:13834]	9	39072767	39288315	-1
ENSG00000245864	2.10574	2.31331	21.3939	7e-16	1.59e-14	26.5057		CTC-467M3.1		5	88676218	88722831	1
ENSG00000187957	-7.73806	-0.44301	-22.4353	2.65e-16	6.84e-15	26.4866	92737	DNER	delta/notch like EGF repeat containing [Source:HGNC Symbol;Acc:HGNC:24456]	2	229357629	229714558	-1
ENSG00000169946	-4.99992	1.04055	-21.843	4.58e-16	1.1e-14	26.4858	23414	ZFPM2	zinc finger protein, FOG family member 2 [Source:HGNC Symbol;Acc:HGNC:16700]	8	104590733	105804532	1
ENSG00000089154	-0.76153	7.22567	-22.0798	3.68e-16	9.13e-15	26.4785	10985	GCN1	GCN1, eIF2 alpha kinase activator homolog [Source:HGNC Symbol;Acc:HGNC:4199]	12	120127203	120194710	-1
ENSG00000251151	-2.30213	2.75174	-21.3439	7.34e-16	1.65e-14	26.4616	100874365	HOXC-AS3	HOXC cluster antisense RNA 3 [Source:HGNC Symbol;Acc:HGNC:43751]	12	53981509	53985519	-1
ENSG00000130203	-1.53671	4.92412	-21.7333	5.08e-16	1.2e-14	26.4482	348	APOE	apolipoprotein E [Source:HGNC Symbol;Acc:HGNC:613]	19	44905754	44909393	1
ENSG00000198053	-4.00458	1.9783	-21.3473	7.32e-16	1.65e-14	26.4331	140885	SIRPA	signal regulatory protein alpha [Source:HGNC Symbol;Acc:HGNC:9662]	20	1894167	1940592	1
ENSG00000180758	-2.37019	2.7174	-21.3066	7.61e-16	1.71e-14	26.4304	80045	GPR157	G protein-coupled receptor 157 [Source:HGNC Symbol;Acc:HGNC:23687]	1	9100305	9129170	-1
ENSG00000158270	-3.66472	2.37644	-21.2798	7.81e-16	1.75e-14	26.4205	81035	COLEC12	collectin subfamily member 12 [Source:HGNC Symbol;Acc:HGNC:16016]	18	316740	500722	-1
ENSG00000137486	1.09375	5.24503	21.825	4.66e-16	1.12e-14	26.4183	408	ARRB1	arrestin beta 1 [Source:HGNC Symbol;Acc:HGNC:711]	11	75264182	75351705	-1
ENSG00000164048	1.05403	5.14188	21.7933	4.8e-16	1.14e-14	26.4032	51385	ZNF589	zinc finger protein 589 [Source:HGNC Symbol;Acc:HGNC:16747]	3	48241100	48299253	1
ENSG00000206527	-1.11119	5.92203	-21.87	4.47e-16	1.08e-14	26.3997	201562	HACD2	3-hydroxyacyl-CoA dehydratase 2 [Source:HGNC Symbol;Acc:HGNC:9640]	3	123490820	123585185	-1
ENSG00000230530	1.18148	3.92145	21.5438	6.07e-16	1.4e-14	26.3848		LIMD1-AS1	LIMD1 antisense RNA 1 [Source:HGNC Symbol;Acc:HGNC:44107]	3	45679043	45689134	-1
ENSG00000137285	-0.841575	7.61459	-21.99	4e-16	9.8e-15	26.3707	347733	TUBB2B	tubulin beta 2B class IIb [Source:HGNC Symbol;Acc:HGNC:30829]	6	3224261	3231730	-1
ENSG00000283154	1.22562	4.37134	21.5916	5.8e-16	1.35e-14	26.3468	100505385	IQCJ-SCHIP1	IQCJ-SCHIP1 readthrough [Source:HGNC Symbol;Acc:HGNC:38842]	3	159069433	159896774	1
ENSG00000283245	1.22562	4.37134	21.5916	5.8e-16	1.35e-14	26.3468	29970	SCHIP1	schwannomin interacting protein 1 [Source:HGNC Symbol;Acc:HGNC:15678]	3	159273821	159896774	1
ENSG00000107438	1.45392	4.11263	21.5268	6.17e-16	1.42e-14	26.3378	9124	PDLIM1	PDZ and LIM domain 1 [Source:HGNC Symbol;Acc:HGNC:2067]	10	95237572	95291024	-1
ENSG00000173801	-1.22842	5.36495	-21.7089	5.2e-16	1.23e-14	26.3297	3728	JUP	junction plakoglobin [Source:HGNC Symbol;Acc:HGNC:6207]	17	41754604	41786931	-1
ENSG00000273079	3.61414	1.52492	21.1749	8.63e-16	1.91e-14	26.3117	2904	GRIN2B	glutamate ionotropic receptor NMDA type subunit 2B [Source:HGNC Symbol;Acc:HGNC:4586]	12	13437942	13981957	-1
ENSG00000164889	-0.903516	6.20604	-21.8114	4.72e-16	1.13e-14	26.3022	6522	SLC4A2	solute carrier family 4 member 2 [Source:HGNC Symbol;Acc:HGNC:11028]	7	151057210	151076527	1
ENSG00000239704	-1.81546	3.14133	-21.2141	8.32e-16	1.85e-14	26.2709	284040	CDRT4	CMT1A duplicated region transcript 4 [Source:HGNC Symbol;Acc:HGNC:14383]	17	15436015	15503608	-1
ENSG00000254528	1.15291	5.37028	21.6916	5.28e-16	1.24e-14	26.2705		RP11-728F11.4		11	117833719	117838942	1
ENSG00000138593	0.920754	6.5811	21.8231	4.67e-16	1.12e-14	26.2629	9728	SECISBP2L	SECIS binding protein 2 like [Source:HGNC Symbol;Acc:HGNC:28997]	15	48988476	49046563	-1
ENSG00000154864	-1.08212	5.42198	-21.6566	5.46e-16	1.28e-14	26.2621	63895	PIEZO2	piezo type mechanosensitive ion channel component 2 [Source:HGNC Symbol;Acc:HGNC:26270]	18	10666483	11148762	-1
ENSG00000150048	-7.36754	-0.474056	-22.1511	3.44e-16	8.59e-15	26.2596	51267	CLEC1A	C-type lectin domain family 1 member A [Source:HGNC Symbol;Acc:HGNC:24355]	12	10069554	10111627	-1
ENSG00000110237	-1.37399	5.00693	-21.5616	5.97e-16	1.38e-14	26.2556	9828	ARHGEF17	Rho guanine nucleotide exchange factor 17 [Source:HGNC Symbol;Acc:HGNC:21726]	11	73308289	73369091	1
ENSG00000092051	-4.70726	1.45	-21.3441	7.34e-16	1.65e-14	26.2468	84502	JPH4	junctophilin 4 [Source:HGNC Symbol;Acc:HGNC:20156]	14	23568035	23578800	-1
ENSG00000187678	-2.18691	6.948	-21.7792	4.86e-16	1.16e-14	26.2397	81848	SPRY4	sprouty RTK signaling antagonist 4 [Source:HGNC Symbol;Acc:HGNC:15533]	5	142310427	142326455	-1
ENSG00000112473	-0.738373	6.53276	-21.777	4.87e-16	1.16e-14	26.2335	7922	SLC39A7	solute carrier family 39 member 7 [Source:HGNC Symbol;Acc:HGNC:4927]	6	33200445	33204439	1
ENSG00000078596	-4.04513	1.98675	-21.1324	9e-16	1.99e-14	26.2323	9452	ITM2A	integral membrane protein 2A [Source:HGNC Symbol;Acc:HGNC:6173]	X	79360384	79367667	-1
ENSG00000232220	-6.38958	-1.64511	-22.2466	3.15e-16	7.95e-15	26.223		AC008440.5		19	53874626	53876049	-1
ENSG00000010610	-4.16538	2.41594	-21.0798	9.46e-16	2.07e-14	26.2199	920	CD4	CD4 molecule [Source:HGNC Symbol;Acc:HGNC:1678]	12	6786858	6820808	1
ENSG00000249568	6.83753	-1.09126	21.8122	4.72e-16	1.13e-14	26.2001		RP11-234O6.2		4	161378953	161388417	1
ENSG00000166923	-6.51072	0.0939875	-22.0662	3.72e-16	9.22e-15	26.2	26585	GREM1	gremlin 1, DAN family BMP antagonist [Source:HGNC Symbol;Acc:HGNC:2001]	15	32717974	32745107	1
ENSG00000112936	-4.37911	1.06017	-21.366	7.19e-16	1.63e-14	26.1937	730	C7	complement component 7 [Source:HGNC Symbol;Acc:HGNC:1346]	5	40909252	40982939	1
ENSG00000104823	-1.10177	4.88047	-21.4768	6.47e-16	1.48e-14	26.1798	1891	ECH1	enoyl-CoA hydratase 1 [Source:HGNC Symbol;Acc:HGNC:3149]	19	38815422	38832005	-1
ENSG00000182256	-4.84287	0.770923	-21.5794	5.87e-16	1.36e-14	26.1795	2567	GABRG3	gamma-aminobutyric acid type A receptor gamma3 subunit [Source:HGNC Symbol;Acc:HGNC:4088]	15	26971282	27541991	1
ENSG00000232977	3.01931	1.26256	21.0412	9.82e-16	2.14e-14	26.1779	100506697	LINC00327	long intergenic non-protein coding RNA 327 [Source:HGNC Symbol;Acc:HGNC:42009]	13	23466571	23487464	1
ENSG00000071991	8.77279	0.818516	21.6494	5.5e-16	1.29e-14	26.1392	28513	CDH19	cadherin 19 [Source:HGNC Symbol;Acc:HGNC:1758]	18	66501083	66604138	-1
ENSG00000134574	1.26742	5.44777	21.5651	5.95e-16	1.38e-14	26.1377	1643	DDB2	damage specific DNA binding protein 2 [Source:HGNC Symbol;Acc:HGNC:2718]	11	47214465	47239240	1
ENSG00000073464	-1.94682	2.98531	-21.0447	9.79e-16	2.14e-14	26.1311	1183	CLCN4	chloride voltage-gated channel 4 [Source:HGNC Symbol;Acc:HGNC:2022]	X	10156945	10237660	1
ENSG00000185532	-1.36154	3.96909	-21.2203	8.27e-16	1.84e-14	26.1135	5592	PRKG1	protein kinase, cGMP-dependent, type I [Source:HGNC Symbol;Acc:HGNC:9414]	10	50991358	52298350	1
ENSG00000196547	1.20173	4.81079	21.4368	6.72e-16	1.53e-14	26.1133	4122	MAN2A2	mannosidase alpha class 2A member 2 [Source:HGNC Symbol;Acc:HGNC:6825]	15	90902218	90922584	1
ENSG00000116194	-3.08569	2.0522	-20.9542	1.07e-15	2.3e-14	26.1074	9068	ANGPTL1	angiopoietin like 1 [Source:HGNC Symbol;Acc:HGNC:489]	1	178849705	178871052	-1
ENSG00000163359	-7.80304	-0.405969	-21.9437	4.17e-16	1.02e-14	26.1068	1293	COL6A3	collagen type VI alpha 3 chain [Source:HGNC Symbol;Acc:HGNC:2213]	2	237324003	237414375	-1
ENSG00000120708	-5.99924	1.92339	-21.2367	8.14e-16	1.81e-14	26.1055	7045	TGFBI	transforming growth factor beta induced [Source:HGNC Symbol;Acc:HGNC:11771]	5	136028895	136063818	1
ENSG00000165023	-5.59899	0.273625	-21.9339	4.21e-16	1.02e-14	26.0873	54769	DIRAS2	DIRAS family GTPase 2 [Source:HGNC Symbol;Acc:HGNC:19323]	9	90609832	90643105	-1
ENSG00000088305	-1.02006	5.84474	-21.5415	6.08e-16	1.4e-14	26.0853	1789	DNMT3B	DNA methyltransferase 3 beta [Source:HGNC Symbol;Acc:HGNC:2979]	20	32762385	32809356	1
ENSG00000230615	2.05149	2.51943	20.9849	1.04e-15	2.24e-14	26.0851		RP5-1198O20.4		1	44030443	44115913	1
ENSG00000074657	0.669226	7.57778	21.6942	5.27e-16	1.24e-14	26.0768	55205	ZNF532	zinc finger protein 532 [Source:HGNC Symbol;Acc:HGNC:30940]	18	58862600	58986480	1
ENSG00000275971	-8.27813	-0.935302	-21.9192	4.27e-16	1.04e-14	26.0761		RMST_6	Rhabdomyosarcoma 2 associated transcript conserved region 6 [Source:RFAM;Acc:RF01967]	12	97530656	97530858	1
ENSG00000167771	-1.34554	5.62406	-21.4613	6.57e-16	1.5e-14	26.0524	283248	RCOR2	REST corepressor 2 [Source:HGNC Symbol;Acc:HGNC:27455]	11	63911221	63916844	-1
ENSG00000118922	-0.822918	6.54001	-21.5847	5.84e-16	1.35e-14	26.0465	11278	KLF12	Kruppel like factor 12 [Source:HGNC Symbol;Acc:HGNC:6346]	13	73686089	73995056	-1
ENSG00000261824	0.984655	4.92037	21.3875	7.04e-16	1.6e-14	26.0417	148189	LINC00662	long intergenic non-protein coding RNA 662 [Source:HGNC Symbol;Acc:HGNC:27122]	19	27684580	27793940	-1
ENSG00000157927	-2.81609	2.12874	-20.8785	1.15e-15	2.45e-14	26.0405	55698	RADIL	Rap associating with DIL domain [Source:HGNC Symbol;Acc:HGNC:22226]	7	4797055	4883719	-1
ENSG00000179314	-1.98621	4.79792	-21.2485	8.05e-16	1.8e-14	26.0268	23302 339166	WSCD1	WSC domain containing 1 [Source:HGNC Symbol;Acc:HGNC:29060]	17	5772234	6124427	1
ENSG00000213337	1.15626	4.17231	21.2272	8.21e-16	1.83e-14	26.0247	51239	ANKRD39	ankyrin repeat domain 39 [Source:HGNC Symbol;Acc:HGNC:28640]	2	96836611	96858095	-1
ENSG00000156675	-1.13978	5.15479	-21.3653	7.19e-16	1.63e-14	26.0229	80223	RAB11FIP1	RAB11 family interacting protein 1 [Source:HGNC Symbol;Acc:HGNC:30265]	8	37858618	37899467	-1
ENSG00000198353	-2.30394	2.76287	-20.882	1.15e-15	2.44e-14	26.0106	3221	HOXC4	homeobox C4 [Source:HGNC Symbol;Acc:HGNC:5126]	12	54016931	54056030	1
ENSG00000279117	1.18028	4.63547	21.2843	7.77e-16	1.74e-14	25.9939		CTD-2562J17.6		11	75260129	75262466	-1
ENSG00000214121	-1.37136	4.19826	-21.1395	8.93e-16	1.98e-14	25.9906		PRDX1P1	peroxiredoxin 1 pseudogene 1 [Source:HGNC Symbol;Acc:HGNC:11711]	9	12972843	12973438	-1
ENSG00000214776	2.91823	1.35429	20.835	1.2e-15	2.54e-14	25.9891		RP11-726G1.1		12	9467552	9576275	1
ENSG00000115738	-4.31425	2.58532	-20.8269	1.21e-15	2.55e-14	25.9835	3398	ID2	inhibitor of DNA binding 2, HLH protein [Source:HGNC Symbol;Acc:HGNC:5361]	2	8678845	8684453	1
ENSG00000240771	-1.18362	4.07373	-21.1138	9.16e-16	2.02e-14	25.9783	115557	ARHGEF25	Rho guanine nucleotide exchange factor 25 [Source:HGNC Symbol;Acc:HGNC:30275]	12	57610180	57619379	1
ENSG00000266074	-1.49079	4.87408	-21.2425	8.09e-16	1.8e-14	25.9725	57597	BAHCC1	BAH domain and coiled-coil containing 1 [Source:HGNC Symbol;Acc:HGNC:29279]	17	81395475	81466332	1
ENSG00000149485	-0.839361	8.73901	-21.6148	5.68e-16	1.32e-14	25.9499	3992 100302263	FADS1	fatty acid desaturase 1 [Source:HGNC Symbol;Acc:HGNC:3574]	11	61799625	61829318	-1
ENSG00000071205	-1.8737	3.55976	-20.947	1.08e-15	2.32e-14	25.9448	79658	ARHGAP10	Rho GTPase activating protein 10 [Source:HGNC Symbol;Acc:HGNC:26099]	4	147732063	148072780	1
ENSG00000176641	-2.09751	3.779	-20.9665	1.06e-15	2.28e-14	25.9409	220441	RNF152	ring finger protein 152 [Source:HGNC Symbol;Acc:HGNC:26811]	18	61808063	61894247	-1
ENSG00000138449	3.04296	0.807671	20.8291	1.21e-15	2.54e-14	25.9249	30061	SLC40A1	solute carrier family 40 member 1 [Source:HGNC Symbol;Acc:HGNC:10909]	2	189560579	189583758	-1
ENSG00000166073	-4.39437	2.58068	-20.7538	1.3e-15	2.7e-14	25.9109	11245	GPR176	G protein-coupled receptor 176 [Source:HGNC Symbol;Acc:HGNC:32370]	15	39799032	39920892	-1
ENSG00000172380	1.59469	5.32537	21.2753	7.84e-16	1.75e-14	25.8781	55970	GNG12	G protein subunit gamma 12 [Source:HGNC Symbol;Acc:HGNC:19663]	1	67701466	67833467	-1
ENSG00000072163	4.29928	0.77275	20.8533	1.18e-15	2.5e-14	25.877	55679	LIMS2	LIM zinc finger domain containing 2 [Source:HGNC Symbol;Acc:HGNC:16084]	2	127638381	127681786	-1
ENSG00000156103	1.1219	7.81382	21.4952	6.36e-16	1.46e-14	25.8679	4325	MMP16	matrix metallopeptidase 16 [Source:HGNC Symbol;Acc:HGNC:7162]	8	88032009	88328025	-1
ENSG00000132692	4.40197	0.545949	20.9091	1.12e-15	2.39e-14	25.8666	63827	BCAN	brevican [Source:HGNC Symbol;Acc:HGNC:23059]	1	156641390	156659532	1
ENSG00000273942	-8.1137	-1.02489	-21.6526	5.48e-16	1.28e-14	25.8574		RMST_2	Rhabdomyosarcoma 2 associated transcript conserved region 2 [Source:RFAM;Acc:RF01963]	12	97492462	97492597	1
ENSG00000257225	-2.83044	3.37561	-20.762	1.29e-15	2.69e-14	25.8462		RP11-328C8.4		12	42459366	42466128	1
ENSG00000092096	-1.41918	4.30151	-21.007	1.02e-15	2.2e-14	25.8418	51310	SLC22A17	solute carrier family 22 member 17 [Source:HGNC Symbol;Acc:HGNC:23095]	14	23346306	23352912	-1
ENSG00000253851	-6.84224	-1.40131	-21.7032	5.22e-16	1.23e-14	25.8408		RP11-318M2.3		8	103228425	103229314	-1
ENSG00000162729	-1.45265	4.81605	-21.0964	9.31e-16	2.05e-14	25.8352	93185	IGSF8	immunoglobulin superfamily member 8 [Source:HGNC Symbol;Acc:HGNC:17813]	1	160091340	160098943	-1
ENSG00000280114	-6.2786	-1.38433	-21.7209	5.14e-16	1.21e-14	25.8351		RP5-875O13.7		1	16681097	16688749	-1
ENSG00000182240	4.2722	0.599467	20.8445	1.19e-15	2.52e-14	25.8309	25825	BACE2	beta-site APP-cleaving enzyme 2 [Source:HGNC Symbol;Acc:HGNC:934]	21	41167801	41282518	1
ENSG00000164929	-7.35219	-0.333749	-21.5903	5.81e-16	1.35e-14	25.8208	79870	BAALC	brain and acute leukemia, cytoplasmic [Source:HGNC Symbol;Acc:HGNC:14333]	8	103140710	103230305	1
ENSG00000106537	1.15934	4.4992	21.0758	9.5e-16	2.08e-14	25.8113	27075	TSPAN13	tetraspanin 13 [Source:HGNC Symbol;Acc:HGNC:21643]	7	16753535	16784536	1
ENSG00000065911	-0.823578	7.16697	-21.3777	7.11e-16	1.61e-14	25.7964	10797	MTHFD2	methylenetetrahydrofolate dehydrogenase (NADP+ dependent) 2, methenyltetrahydrofolate cyclohydrolase [Source:HGNC Symbol;Acc:HGNC:7434]	2	74198562	74217565	1
ENSG00000134755	-1.90449	4.42146	-20.9444	1.08e-15	2.32e-14	25.7883	1824	DSC2	desmocollin 2 [Source:HGNC Symbol;Acc:HGNC:3036]	18	31058840	31102415	-1
ENSG00000170647	1.51514	3.27819	20.8113	1.23e-15	2.58e-14	25.785	83935	TMEM133	transmembrane protein 133 [Source:HGNC Symbol;Acc:HGNC:24033]	11	100991989	100993941	1
ENSG00000135931	-1.13269	4.71844	-21.0224	1e-15	2.17e-14	25.7603	80210	ARMC9	armadillo repeat containing 9 [Source:HGNC Symbol;Acc:HGNC:20730]	2	231198546	231374837	1
ENSG00000165556	-5.9292	-2.21661	-21.7551	4.98e-16	1.18e-14	25.7466	1045	CDX2	caudal type homeobox 2 [Source:HGNC Symbol;Acc:HGNC:1806]	13	27962137	27971139	-1
ENSG00000230246	5.8485	-2.53016	21.4937	6.37e-16	1.46e-14	25.7373		SPATA31C1	SPATA31 subfamily C member 1 [Source:HGNC Symbol;Acc:HGNC:27846]	9	87914493	87923505	1
ENSG00000143772	-1.44094	3.70552	-20.7726	1.28e-15	2.66e-14	25.7201	3707	ITPKB	inositol-trisphosphate 3-kinase B [Source:HGNC Symbol;Acc:HGNC:6179]	1	226631690	226739323	-1
ENSG00000168646	-0.831749	7.21566	-21.3002	7.66e-16	1.72e-14	25.7166	8313	AXIN2	axin 2 [Source:HGNC Symbol;Acc:HGNC:904]	17	65528563	65561647	-1
ENSG00000173889	0.883047	6.03534	21.1995	8.43e-16	1.87e-14	25.6963	80012	PHC3	polyhomeotic homolog 3 [Source:HGNC Symbol;Acc:HGNC:15682]	3	170086732	170181749	-1
ENSG00000153933	-1.47718	4.0242	-20.8032	1.24e-15	2.59e-14	25.6933	8526	DGKE	diacylglycerol kinase epsilon [Source:HGNC Symbol;Acc:HGNC:2852]	17	56834099	56869567	1
ENSG00000136999	3.97396	1.84365	20.5051	1.66e-15	3.38e-14	25.6749	4856	NOV	nephroblastoma overexpressed [Source:HGNC Symbol;Acc:HGNC:7885]	8	119416306	119424353	1
ENSG00000005483	-0.929362	5.80468	-21.1056	9.23e-16	2.03e-14	25.6541	55904	KMT2E	lysine methyltransferase 2E [Source:HGNC Symbol;Acc:HGNC:18541]	7	105014179	105114361	1
ENSG00000137266	-1.70775	3.63517	-20.6641	1.42e-15	2.93e-14	25.6387	63027	SLC22A23	solute carrier family 22 member 23 [Source:HGNC Symbol;Acc:HGNC:21106]	6	3268962	3457022	-1
ENSG00000050438	-3.49921	4.19878	-20.6215	1.48e-15	3.04e-14	25.6276	9498	SLC4A8	solute carrier family 4 member 8 [Source:HGNC Symbol;Acc:HGNC:11034]	12	51391317	51515763	1
ENSG00000183826	1.00472	4.66762	20.9168	1.11e-15	2.38e-14	25.6175	114781	BTBD9	BTB domain containing 9 [Source:HGNC Symbol;Acc:HGNC:21228]	6	38168451	38640148	-1
ENSG00000279673	1.50192	3.50872	20.6814	1.4e-15	2.88e-14	25.612		RP11-185E8.2		3	171460612	171462256	1
ENSG00000124900	5.78487	0.363617	20.8636	1.17e-15	2.48e-14	25.6108	84767	TRIM51	tripartite motif-containing 51 [Source:HGNC Symbol;Acc:HGNC:19023]	11	55883297	55891810	1
ENSG00000173320	-1.51443	4.28441	-20.759	1.29e-15	2.69e-14	25.6013	56977	STOX2	storkhead box 2 [Source:HGNC Symbol;Acc:HGNC:25450]	4	183798022	184023526	1
ENSG00000263146	-7.11048	-1.25186	-21.3568	7.25e-16	1.64e-14	25.5828		RP11-849I19.1		18	78976555	78979074	-1
ENSG00000116147	-6.37634	-0.691181	-21.3322	7.43e-16	1.67e-14	25.5765	7143	TNR	tenascin R [Source:HGNC Symbol;Acc:HGNC:11953]	1	175315194	175743770	-1
ENSG00000129946	3.79132	1.47757	20.4146	1.82e-15	3.67e-14	25.5741	25759	SHC2	SHC adaptor protein 2 [Source:HGNC Symbol;Acc:HGNC:29869]	19	416583	460996	-1
ENSG00000198753	4.49105	0.775663	20.542	1.6e-15	3.27e-14	25.5722	5365	PLXNB3	plexin B3 [Source:HGNC Symbol;Acc:HGNC:9105]	X	153764196	153779346	1
ENSG00000065600	1.03222	4.71216	20.8789	1.15e-15	2.45e-14	25.5714	55248	TMEM206	transmembrane protein 206 [Source:HGNC Symbol;Acc:HGNC:25593]	1	212363931	212414901	-1
ENSG00000168268	0.878195	6.69515	21.1164	9.14e-16	2.02e-14	25.5561	64943	NT5DC2	5'-nucleotidase domain containing 2 [Source:HGNC Symbol;Acc:HGNC:25717]	3	52524385	52535054	-1
ENSG00000211445	-2.45719	2.29211	-20.3831	1.87e-15	3.76e-14	25.5501	2878	GPX3	glutathione peroxidase 3 [Source:HGNC Symbol;Acc:HGNC:4555]	5	151020438	151028993	1
ENSG00000100280	-0.818228	6.77537	-21.1039	9.25e-16	2.03e-14	25.55	162	AP1B1	adaptor related protein complex 1 beta 1 subunit [Source:HGNC Symbol;Acc:HGNC:554]	22	29327680	29423179	-1
ENSG00000164106	1.59453	5.05825	20.8995	1.13e-15	2.41e-14	25.5447	11341	SCRG1	stimulator of chondrogenesis 1 [Source:HGNC Symbol;Acc:HGNC:17036]	4	173384701	173406380	-1
ENSG00000102290	3.13971	1.6417	20.3642	1.91e-15	3.82e-14	25.5366	27328	PCDH11X	protocadherin 11 X-linked [Source:HGNC Symbol;Acc:HGNC:8656]	X	91779261	92623230	1
ENSG00000172985	-5.57028	0.657483	-21.0811	9.45e-16	2.07e-14	25.5341	344558	SH3RF3	SH3 domain containing ring finger 3 [Source:HGNC Symbol;Acc:HGNC:24699]	2	109129348	109504632	1
ENSG00000120318	-1.94803	2.80006	-20.407	1.83e-15	3.69e-14	25.5184	64411	ARAP3	ArfGAP with RhoGAP domain, ankyrin repeat and PH domain 3 [Source:HGNC Symbol;Acc:HGNC:24097]	5	141653401	141682221	-1
ENSG00000188643	5.00213	0.0646443	20.7578	1.29e-15	2.69e-14	25.5089	140576	S100A16	S100 calcium binding protein A16 [Source:HGNC Symbol;Acc:HGNC:20441]	1	153606886	153613145	-1
ENSG00000196776	1.07712	5.85655	20.9827	1.04e-15	2.25e-14	25.5011	961	CD47	CD47 molecule [Source:HGNC Symbol;Acc:HGNC:1682]	3	108043298	108091025	-1
ENSG00000254369	-1.37621	5.15941	-20.829	1.21e-15	2.54e-14	25.4988	100133311	HOXA-AS3	HOXA cluster antisense RNA 3 [Source:HGNC Symbol;Acc:HGNC:43748]	7	27129977	27155928	1
ENSG00000165169	-2.28875	2.40366	-20.3394	1.96e-15	3.9e-14	25.4978	6990	DYNLT3	dynein light chain Tctex-type 3 [Source:HGNC Symbol;Acc:HGNC:11694]	X	37836757	37847637	-1
ENSG00000080493	2.99879	1.69835	20.3171	2e-15	3.96e-14	25.4899	8671	SLC4A4	solute carrier family 4 member 4 [Source:HGNC Symbol;Acc:HGNC:11030]	4	71186757	71572087	1
ENSG00000257727	0.680308	6.58036	21.0377	9.86e-16	2.15e-14	25.4849	10330	CNPY2	canopy FGF signaling regulator 2 [Source:HGNC Symbol;Acc:HGNC:13529]	12	56309842	56316336	-1
ENSG00000120885	-5.0566	2.81419	-20.3203	2e-15	3.95e-14	25.4835	1191 102465508	CLU	clusterin [Source:HGNC Symbol;Acc:HGNC:2095]	8	27596917	27615031	-1
ENSG00000164542	-1.25564	5.03312	-20.7957	1.25e-15	2.6e-14	25.4803	23366	KIAA0895	KIAA0895 [Source:HGNC Symbol;Acc:HGNC:22206]	7	36324221	36390125	-1
ENSG00000171824	0.722408	7.43815	21.0688	9.57e-16	2.09e-14	25.4635	5394	EXOSC10	exosome component 10 [Source:HGNC Symbol;Acc:HGNC:9138]	1	11066618	11099881	-1
ENSG00000226950	-0.848888	6.35776	-20.9818	1.04e-15	2.25e-14	25.4634	57291	DANCR	differentiation antagonizing non-protein coding RNA [Source:HGNC Symbol;Acc:HGNC:28964]	4	52712404	52720351	1
ENSG00000139178	-1.76519	3.47512	-20.4345	1.78e-15	3.6e-14	25.437	51279	C1RL	complement C1r subcomponent like [Source:HGNC Symbol;Acc:HGNC:21265]	12	7089587	7109273	-1
ENSG00000185885	-3.98355	1.63924	-20.3377	1.96e-15	3.91e-14	25.4332	8519	IFITM1	interferon induced transmembrane protein 1 [Source:HGNC Symbol;Acc:HGNC:5412]	11	313506	315272	1
ENSG00000070614	0.793782	7.37752	21.0271	9.96e-16	2.17e-14	25.4247	3340	NDST1	N-deacetylase and N-sulfotransferase 1 [Source:HGNC Symbol;Acc:HGNC:7680]	5	150485818	150558211	1
ENSG00000183873	-2.98994	1.81302	-20.2627	2.11e-15	4.15e-14	25.4242	6331	SCN5A	sodium voltage-gated channel alpha subunit 5 [Source:HGNC Symbol;Acc:HGNC:10593]	3	38548057	38649673	-1
ENSG00000153162	-4.13307	1.73256	-20.3191	2e-15	3.95e-14	25.4189	654	BMP6	bone morphogenetic protein 6 [Source:HGNC Symbol;Acc:HGNC:1073]	6	7726797	7881422	1
ENSG00000005073	-2.60294	2.43498	-20.2527	2.14e-15	4.18e-14	25.4158	3207	HOXA11	homeobox A11 [Source:HGNC Symbol;Acc:HGNC:5101]	7	27181510	27185223	-1
ENSG00000165757	-3.20479	1.64591	-20.268	2.1e-15	4.13e-14	25.4093	57608	KIAA1462	KIAA1462 [Source:HGNC Symbol;Acc:HGNC:29283]	10	30012800	30115494	-1
ENSG00000162630	2.78377	1.36871	20.2341	2.18e-15	4.25e-14	25.404	8707	B3GALT2	beta-1,3-galactosyltransferase 2 [Source:HGNC Symbol;Acc:HGNC:917]	1	193179045	193186654	-1
ENSG00000153902	4.30818	1.05471	20.2892	2.06e-15	4.05e-14	25.3928	163175	LGI4	leucine rich repeat LGI family member 4 [Source:HGNC Symbol;Acc:HGNC:18712]	19	35124513	35142451	-1
ENSG00000198722	0.813436	6.29054	20.9144	1.11e-15	2.38e-14	25.3845	10497	UNC13B	unc-13 homolog B [Source:HGNC Symbol;Acc:HGNC:12566]	9	35161992	35405338	1
ENSG00000075420	-0.732906	6.44545	-20.9051	1.12e-15	2.4e-14	25.3749	64778	FNDC3B	fibronectin type III domain containing 3B [Source:HGNC Symbol;Acc:HGNC:24670]	3	172039628	172401665	1
ENSG00000171488	1.519	3.37335	20.4218	1.8e-15	3.64e-14	25.3733	84230	LRRC8C	leucine rich repeat containing 8 family member C [Source:HGNC Symbol;Acc:HGNC:25075]	1	89633072	89769903	1
ENSG00000228592	-8.71109	-0.702763	-21.0085	1.01e-15	2.2e-14	25.352	266917	D21S2088E	D21S2088E [Source:EntrezGene;Acc:266917]	21	23361104	23384861	-1
ENSG00000107130	0.853058	6.22151	20.8675	1.16e-15	2.47e-14	25.3435	23413	NCS1	neuronal calcium sensor 1 [Source:HGNC Symbol;Acc:HGNC:3953]	9	130172578	130237304	1
ENSG00000146966	-1.10129	4.90265	-20.6433	1.45e-15	2.98e-14	25.3406	27147	DENND2A	DENN domain containing 2A [Source:HGNC Symbol;Acc:HGNC:22212]	7	140518420	140673993	-1
ENSG00000225968	-7.14588	-0.915012	-21.0108	1.01e-15	2.2e-14	25.3191	392617	ELFN1	extracellular leucine rich repeat and fibronectin type III domain containing 1 [Source:HGNC Symbol;Acc:HGNC:33154]	7	1688119	1747954	1
ENSG00000186354	-3.77171	0.874785	-20.3654	1.91e-15	3.82e-14	25.3131	286223	C9orf47	chromosome 9 open reading frame 47 [Source:HGNC Symbol;Acc:HGNC:23669]	9	88990863	88996140	1
ENSG00000069869	0.903669	5.17875	20.6997	1.37e-15	2.84e-14	25.3067	4734	NEDD4	neural precursor cell expressed, developmentally down-regulated 4, E3 ubiquitin protein ligase [Source:HGNC Symbol;Acc:HGNC:7727]	15	55826922	55993746	-1
ENSG00000203727	2.6509	3.27512	20.2986	2.04e-15	4.02e-14	25.3051	389432	SAMD5	sterile alpha motif domain containing 5 [Source:HGNC Symbol;Acc:HGNC:21180]	6	147508927	147737547	1
ENSG00000121039	-1.57725	3.69844	-20.3323	1.97e-15	3.92e-14	25.2815	157506	RDH10	retinol dehydrogenase 10 (all-trans) [Source:HGNC Symbol;Acc:HGNC:19975]	8	73294612	73325281	1
ENSG00000245694	-1.39022	3.98957	-20.3888	1.86e-15	3.75e-14	25.2733	101927480	CRNDE	colorectal neoplasia differentially expressed (non-protein coding) [Source:HGNC Symbol;Acc:HGNC:37078]	16	54845189	54929189	-1
ENSG00000144057	-3.48384	1.35001	-20.1832	2.29e-15	4.44e-14	25.2727	84620	ST6GAL2	ST6 beta-galactoside alpha-2,6-sialyltransferase 2 [Source:HGNC Symbol;Acc:HGNC:10861]	2	106801600	106887108	-1
ENSG00000153885	0.966109	6.28451	20.7961	1.25e-15	2.6e-14	25.2662	79047	KCTD15	potassium channel tetramerization domain containing 15 [Source:HGNC Symbol;Acc:HGNC:23297]	19	33795933	33815763	1
ENSG00000124145	-1.5527	3.5617	-20.2937	2.05e-15	4.03e-14	25.2654	6385	SDC4	syndecan 4 [Source:HGNC Symbol;Acc:HGNC:10661]	20	45325288	45348424	-1
ENSG00000168874	-2.89372	2.66009	-20.1007	2.49e-15	4.78e-14	25.2559	84913	ATOH8	atonal bHLH transcription factor 8 [Source:HGNC Symbol;Acc:HGNC:24126]	2	85751344	85788066	1
ENSG00000164081	1.10941	4.23867	20.4754	1.71e-15	3.47e-14	25.2524	51368	TEX264	testis expressed 264 [Source:HGNC Symbol;Acc:HGNC:30247]	3	51662693	51704323	1
ENSG00000163430	-0.83497	8.51679	-20.9015	1.13e-15	2.4e-14	25.2482	11167 406975	FSTL1	follistatin like 1 [Source:HGNC Symbol;Acc:HGNC:3972]	3	120392293	120451253	-1
ENSG00000227036	2.31091	2.61602	20.1453	2.38e-15	4.6e-14	25.2358	400619	LINC00511	long intergenic non-protein coding RNA 511 [Source:HGNC Symbol;Acc:HGNC:43564]	17	72323123	72640472	-1
ENSG00000132563	-1.67247	4.08106	-20.3459	1.95e-15	3.88e-14	25.2297	51308	REEP2	receptor accessory protein 2 [Source:HGNC Symbol;Acc:HGNC:17975]	5	138439017	138446969	1
ENSG00000274290	-1.00926	7.24408	-20.8039	1.24e-15	2.59e-14	25.2176	8344	HIST1H2BE	histone cluster 1, H2be [Source:HGNC Symbol;Acc:HGNC:4753]	6	26172059	26184655	1
ENSG00000158008	1.93913	2.54107	20.1254	2.43e-15	4.68e-14	25.2156	2134	EXTL1	exostosin like glycosyltransferase 1 [Source:HGNC Symbol;Acc:HGNC:3515]	1	26019884	26036464	1
ENSG00000163629	-0.746325	7.60741	-20.822	1.22e-15	2.55e-14	25.2126	5783	PTPN13	protein tyrosine phosphatase, non-receptor type 13 [Source:HGNC Symbol;Acc:HGNC:9646]	4	86594315	86815171	1
ENSG00000278705	-0.963124	7.84543	-20.8297	1.21e-15	2.54e-14	25.2095	8366	HIST1H4B	histone cluster 1, H4b [Source:HGNC Symbol;Acc:HGNC:4789]	6	26026815	26027252	-1
ENSG00000172789	-3.30247	1.44743	-20.0859	2.52e-15	4.84e-14	25.2034	3222	HOXC5	homeobox C5 [Source:HGNC Symbol;Acc:HGNC:5127]	12	54032853	54035358	1
ENSG00000096654	0.860028	5.1203	20.5727	1.55e-15	3.18e-14	25.186	7738	ZNF184	zinc finger protein 184 [Source:HGNC Symbol;Acc:HGNC:12975]	6	27450743	27473118	-1
ENSG00000114650	-0.876015	5.87453	-20.6433	1.45e-15	2.98e-14	25.1748	22937	SCAP	SREBF chaperone [Source:HGNC Symbol;Acc:HGNC:30634]	3	47413694	47477126	-1
ENSG00000100225	0.775969	6.71456	20.7385	1.32e-15	2.74e-14	25.1724	25793	FBXO7	F-box protein 7 [Source:HGNC Symbol;Acc:HGNC:13586]	22	32474676	32498829	1
ENSG00000146281	0.963756	4.66721	20.4793	1.7e-15	3.46e-14	25.1717	135293	PM20D2	peptidase M20 domain containing 2 [Source:HGNC Symbol;Acc:HGNC:21408]	6	89146050	89165565	1
ENSG00000256463	-7.23619	1.3986	-20.7041	1.36e-15	2.83e-14	25.1673	27164	SALL3	spalt like transcription factor 3 [Source:HGNC Symbol;Acc:HGNC:10527]	18	78980275	79002677	1
ENSG00000183010	-1.09904	5.08752	-20.4887	1.69e-15	3.44e-14	25.1486	5831	PYCR1	pyrroline-5-carboxylate reductase 1 [Source:HGNC Symbol;Acc:HGNC:9721]	17	81932384	81942412	-1
ENSG00000240694	-2.23792	4.07435	-20.2171	2.21e-15	4.32e-14	25.1377	10687	PNMA2	paraneoplastic Ma antigen 2 [Source:HGNC Symbol;Acc:HGNC:9159]	8	26504686	26514092	-1
ENSG00000015133	0.941102	5.49176	20.5797	1.54e-15	3.16e-14	25.1369	440193	CCDC88C	coiled-coil domain containing 88C [Source:HGNC Symbol;Acc:HGNC:19967]	14	91271323	91417844	-1
ENSG00000179218	-0.72936	9.21075	-20.8221	1.22e-15	2.55e-14	25.1368	811	CALR	calreticulin [Source:HGNC Symbol;Acc:HGNC:1455]	19	12938578	12944489	1
ENSG00000267774	-6.34284	-1.35053	-20.8518	1.18e-15	2.5e-14	25.1359		RP11-2N1.2		18	59696459	59698111	1
ENSG00000197712	-1.45638	3.39808	-20.1216	2.44e-15	4.69e-14	25.1115	92689	FAM114A1	family with sequence similarity 114 member A1 [Source:HGNC Symbol;Acc:HGNC:25087]	4	38867677	38945739	1
ENSG00000135631	-2.8228	2.04364	-19.9269	2.97e-15	5.54e-14	25.0986	26056	RAB11FIP5	RAB11 family interacting protein 5 [Source:HGNC Symbol;Acc:HGNC:24845]	2	73073382	73156721	-1
ENSG00000283151	-1.4086	3.92411	-20.2049	2.24e-15	4.35e-14	25.0977	51310	AL049829.1	solute carrier family 22 member 17 isoform c [Source:RefSeq peptide;Acc:NP_001275979]	14	23346648	23352214	-1
ENSG00000170412	-6.37601	1.02941	-20.5769	1.55e-15	3.17e-14	25.0918	55890	GPRC5C	G protein-coupled receptor class C group 5 member C [Source:HGNC Symbol;Acc:HGNC:13309]	17	74424851	74451653	1
ENSG00000258839	1.6017	2.98155	20.0718	2.56e-15	4.89e-14	25.0848	4157	MC1R	melanocortin 1 receptor [Source:HGNC Symbol;Acc:HGNC:6929]	16	89912119	89920977	1
ENSG00000165655	-2.08979	3.38581	-20.0449	2.63e-15	5.01e-14	25.0715	84858	ZNF503	zinc finger protein 503 [Source:HGNC Symbol;Acc:HGNC:23589]	10	75397830	75401906	-1
ENSG00000196083	1.74154	2.54541	19.9859	2.79e-15	5.27e-14	25.0671	3556	IL1RAP	interleukin 1 receptor accessory protein [Source:HGNC Symbol;Acc:HGNC:5995]	3	190514051	190659750	1
ENSG00000205476	-1.39564	5.10382	-20.3832	1.87e-15	3.76e-14	25.0537	317762	CCDC85C	coiled-coil domain containing 85C [Source:HGNC Symbol;Acc:HGNC:35459]	14	99500180	99604026	-1
ENSG00000096060	-1.25545	5.10709	-20.3851	1.87e-15	3.76e-14	25.0469	2289	FKBP5	FK506 binding protein 5 [Source:HGNC Symbol;Acc:HGNC:3721]	6	35573585	35728583	-1
ENSG00000150764	-1.02476	5.52961	-20.4605	1.74e-15	3.51e-14	25.0421	85458	DIXDC1	DIX domain containing 1 [Source:HGNC Symbol;Acc:HGNC:23695]	11	111927144	112022584	1
ENSG00000136451	0.709062	7.41756	20.6428	1.45e-15	2.98e-14	25.0324	7716	VEZF1	vascular endothelial zinc finger 1 [Source:HGNC Symbol;Acc:HGNC:12949]	17	57971547	57988259	-1
ENSG00000164588	1.95956	3.78479	20.1385	2.39e-15	4.62e-14	25.0172	348980	HCN1	hyperpolarization activated cyclic nucleotide gated potassium channel 1 [Source:HGNC Symbol;Acc:HGNC:4845]	5	45254950	45696498	-1
ENSG00000163710	-1.6833	3.50562	-20.0364	2.65e-15	5.04e-14	25.0171	26577	PCOLCE2	procollagen C-endopeptidase enhancer 2 [Source:HGNC Symbol;Acc:HGNC:8739]	3	142815922	142889203	-1
ENSG00000250033	-1.6298	3.59692	-20.052	2.61e-15	4.98e-14	25.0137	641364	SLC7A11-AS1	SLC7A11 antisense RNA 1 [Source:HGNC Symbol;Acc:HGNC:44064]	4	138057464	138178177	1
ENSG00000264982	2.45363	1.77415	19.8483	3.21e-15	5.97e-14	25.0115		RP11-344B2.2		18	32287437	32290340	1
ENSG00000077616	1.19435	4.77665	20.3217	1.99e-15	3.95e-14	24.9928	10003	NAALAD2	N-acetylated alpha-linked acidic dipeptidase 2 [Source:HGNC Symbol;Acc:HGNC:14526]	11	90131515	90192894	1
ENSG00000131899	-0.843254	6.77075	-20.5483	1.59e-15	3.25e-14	24.9863	3996	LLGL1	LLGL1, scribble cell polarity complex component [Source:HGNC Symbol;Acc:HGNC:6628]	17	18225587	18244875	1
ENSG00000136153	1.52018	3.55646	20.0774	2.55e-15	4.87e-14	24.9839	4008	LMO7	LIM domain 7 [Source:HGNC Symbol;Acc:HGNC:6646]	13	75620434	75859870	1
ENSG00000101098	-3.428	1.31356	-19.8831	3.1e-15	5.79e-14	24.9784	140730	RIMS4	regulating synaptic membrane exocytosis 4 [Source:HGNC Symbol;Acc:HGNC:16183]	20	44751808	44810338	-1
ENSG00000135547	-2.57458	3.6249	-19.962	2.86e-15	5.39e-14	24.9773	23493	HEY2	hes related family bHLH transcription factor with YRPW motif 2 [Source:HGNC Symbol;Acc:HGNC:4881]	6	125747664	125761269	1
ENSG00000103365	0.910351	6.52412	20.533	1.62e-15	3.3e-14	24.9765	23062	GGA2	golgi associated, gamma adaptin ear containing, ARF binding protein 2 [Source:HGNC Symbol;Acc:HGNC:16064]	16	23463542	23521995	-1
ENSG00000127311	1.18715	4.28442	20.2117	2.22e-15	4.33e-14	24.9727	92797	HELB	DNA helicase B [Source:HGNC Symbol;Acc:HGNC:17196]	12	66302545	66347645	1
ENSG00000005810	0.857736	7.51293	20.5816	1.54e-15	3.16e-14	24.964	23077	MYCBP2	MYC binding protein 2, E3 ubiquitin protein ligase [Source:HGNC Symbol;Acc:HGNC:23386]	13	77044655	77327050	-1
ENSG00000120833	1.41318	3.74882	20.094	2.5e-15	4.81e-14	24.9611	8835	SOCS2	suppressor of cytokine signaling 2 [Source:HGNC Symbol;Acc:HGNC:19382]	12	93569814	93583487	1
ENSG00000215808	-1.76663	2.85885	-19.8694	3.15e-15	5.86e-14	24.9522	339535	LINC01139	long intergenic non-protein coding RNA 1139 [Source:HGNC Symbol;Acc:HGNC:27924]	1	238480384	238486023	-1
ENSG00000249577	3.69541	0.0756779	19.999	2.76e-15	5.21e-14	24.9475		CTD-2195M15.1		5	127465822	127466118	1
ENSG00000144036	-1.16538	4.74381	-20.2271	2.19e-15	4.28e-14	24.9455	23233	EXOC6B	exocyst complex component 6B [Source:HGNC Symbol;Acc:HGNC:17085]	2	72175984	72826041	-1
ENSG00000182568	1.41427	4.3275	20.1543	2.36e-15	4.56e-14	24.9098	6304	SATB1	SATB homeobox 1 [Source:HGNC Symbol;Acc:HGNC:10541]	3	18345387	18445588	-1
ENSG00000149115	-0.977985	6.18844	-20.4056	1.83e-15	3.69e-14	24.8966	85456	TNKS1BP1	tankyrase 1 binding protein 1 [Source:HGNC Symbol;Acc:HGNC:19081]	11	57299638	57324952	-1
ENSG00000133943	-2.09722	3.14098	-19.8379	3.25e-15	6.03e-14	24.895	80017	C14orf159	chromosome 14 open reading frame 159 [Source:HGNC Symbol;Acc:HGNC:20498]	14	91060333	91225632	1
ENSG00000159164	-0.768185	5.84163	-20.3576	1.92e-15	3.84e-14	24.8813	9900	SV2A	synaptic vesicle glycoprotein 2A [Source:HGNC Symbol;Acc:HGNC:20566]	1	149903318	149917882	-1
ENSG00000176170	-1.46709	4.66659	-20.125	2.43e-15	4.68e-14	24.8729	8877	SPHK1	sphingosine kinase 1 [Source:HGNC Symbol;Acc:HGNC:11240]	17	76376584	76387860	1
ENSG00000005249	-1.23193	4.03404	-20.0075	2.73e-15	5.17e-14	24.8603	5577	PRKAR2B	protein kinase cAMP-dependent type II regulatory subunit beta [Source:HGNC Symbol;Acc:HGNC:9392]	7	107044649	107161811	1
ENSG00000143167	-6.42796	-0.835925	-20.4806	1.7e-15	3.46e-14	24.8595	10223	GPA33	glycoprotein A33 [Source:HGNC Symbol;Acc:HGNC:4445]	1	167052836	167166479	-1
ENSG00000168672	-2.43422	4.20594	-19.9548	2.88e-15	5.42e-14	24.8556	157638	FAM84B	family with sequence similarity 84 member B [Source:HGNC Symbol;Acc:HGNC:24166]	8	126552442	126558393	-1
ENSG00000226608	1.22503	7.40888	20.468	1.72e-15	3.49e-14	24.8522		FTLP3	ferritin light chain pseudogene 3 [Source:HGNC Symbol;Acc:HGNC:4000]	20	4023917	4024444	1
ENSG00000141858	-1.2289	4.66329	-20.0978	2.5e-15	4.79e-14	24.8303		SAMD1	sterile alpha motif domain containing 1 [Source:HGNC Symbol;Acc:HGNC:17958]	19	14087840	14091036	-1
ENSG00000196782	1.06623	4.76559	20.1639	2.33e-15	4.52e-14	24.8285	55534	MAML3	mastermind like transcriptional coactivator 3 [Source:HGNC Symbol;Acc:HGNC:16272]	4	139716753	140154184	-1
ENSG00000173705	2.14919	2.99762	19.8091	3.34e-15	6.19e-14	24.8246	26032	SUSD5	sushi domain containing 5 [Source:HGNC Symbol;Acc:HGNC:29061]	3	33150042	33219215	-1
ENSG00000138653	-3.69897	1.54595	-19.6843	3.8e-15	6.94e-14	24.7987	64579	NDST4	N-deacetylase and N-sulfotransferase 4 [Source:HGNC Symbol;Acc:HGNC:20779]	4	114827763	115113876	-1
ENSG00000266524	-5.17229	2.89371	-19.6325	4.01e-15	7.29e-14	24.7952	2662	GDF10	growth differentiation factor 10 [Source:HGNC Symbol;Acc:HGNC:4215]	10	47300386	47313547	1
ENSG00000185432	-2.52229	4.07312	-19.8632	3.17e-15	5.89e-14	24.7908	25840	METTL7A	methyltransferase like 7A [Source:HGNC Symbol;Acc:HGNC:24550]	12	50923472	50932517	1
ENSG00000279166	3.28027	1.83251	19.6275	4.03e-15	7.31e-14	24.7903		RP11-107E5.3		2	144494265	144496878	-1
ENSG00000132694	0.825801	6.5658	20.3354	1.97e-15	3.91e-14	24.7687	9826	ARHGEF11	Rho guanine nucleotide exchange factor 11 [Source:HGNC Symbol;Acc:HGNC:14580]	1	156934840	157045370	-1
ENSG00000169855	0.769973	7.34803	20.3819	1.88e-15	3.76e-14	24.7671	6091	ROBO1	roundabout guidance receptor 1 [Source:HGNC Symbol;Acc:HGNC:10249]	3	78597240	79767815	-1
ENSG00000158467	1.13736	4.75318	20.0911	2.51e-15	4.81e-14	24.7559	23382	AHCYL2	adenosylhomocysteinase like 2 [Source:HGNC Symbol;Acc:HGNC:22204]	7	129225023	129430211	1
ENSG00000162490	-2.46306	1.75155	-19.5765	4.25e-15	7.67e-14	24.7403	374946	DRAXIN	dorsal inhibitory axon guidance protein [Source:HGNC Symbol;Acc:HGNC:25054]	1	11691729	11725857	1
ENSG00000263873	1.24478	4.69172	20.0526	2.61e-15	4.98e-14	24.7294		RP11-334E6.12		11	119417951	119419114	1
ENSG00000144668	1.01285	6.27643	20.26	2.12e-15	4.15e-14	24.7158	3680	ITGA9	integrin subunit alpha 9 [Source:HGNC Symbol;Acc:HGNC:6145]	3	37452115	37823514	1
ENSG00000123358	1.42911	4.18869	19.9393	2.93e-15	5.48e-14	24.7125	3164	NR4A1	nuclear receptor subfamily 4 group A member 1 [Source:HGNC Symbol;Acc:HGNC:7980]	12	52022832	52059507	1
ENSG00000008735	-3.01643	1.39723	-19.5762	4.25e-15	7.67e-14	24.7057	23542	MAPK8IP2	mitogen-activated protein kinase 8 interacting protein 2 [Source:HGNC Symbol;Acc:HGNC:6883]	22	50600685	50613981	1
ENSG00000268119	-5.27322	-0.331393	-20.2938	2.05e-15	4.03e-14	24.6979		CTD-2561J22.5		19	21444241	21463908	-1
ENSG00000279232	-1.34285	5.33406	-20.0711	2.56e-15	4.89e-14	24.6857		AC008522.1		5	98792863	98795766	-1
ENSG00000113269	0.745556	6.68524	20.2595	2.12e-15	4.15e-14	24.6807	55819	RNF130	ring finger protein 130 [Source:HGNC Symbol;Acc:HGNC:18280]	5	179911651	180072118	-1
ENSG00000255561	1.39862	3.07575	19.6997	3.74e-15	6.85e-14	24.6752	91893	FDXACB1	ferredoxin-fold anticodon binding domain containing 1 [Source:HGNC Symbol;Acc:HGNC:25110]	11	111874056	111881243	-1
ENSG00000139211	1.41491	3.88185	19.8449	3.22e-15	5.99e-14	24.6739	347902	AMIGO2	adhesion molecule with Ig like domain 2 [Source:HGNC Symbol;Acc:HGNC:24073]	12	47075707	47079951	-1
ENSG00000182968	-7.73543	-0.122184	-20.2046	2.24e-15	4.35e-14	24.6691	6656	SOX1	SRY-box 1 [Source:HGNC Symbol;Acc:HGNC:11189]	13	112067647	112070488	1
ENSG00000239264	-0.963619	8.49383	-20.3232	1.99e-15	3.95e-14	24.6568	81567	TXNDC5	thioredoxin domain containing 5 [Source:HGNC Symbol;Acc:HGNC:21073]	6	7881517	7910814	-1
ENSG00000159784	-2.02722	2.82893	-19.5568	4.34e-15	7.82e-14	24.6415	9715	FAM131B	family with sequence similarity 131 member B [Source:HGNC Symbol;Acc:HGNC:22202]	7	143353400	143362770	-1
ENSG00000001167	0.777558	6.60062	20.2094	2.23e-15	4.34e-14	24.6346	4800	NFYA	nuclear transcription factor Y subunit alpha [Source:HGNC Symbol;Acc:HGNC:7804]	6	41072945	41099976	1
ENSG00000166523	-6.12168	-2.11149	-20.3139	2.01e-15	3.97e-14	24.6	26253	CLEC4E	C-type lectin domain family 4 member E [Source:HGNC Symbol;Acc:HGNC:14555]	12	8533305	8540963	-1
ENSG00000136205	1.20329	6.66884	20.177	2.3e-15	4.47e-14	24.5979	64759	TNS3	tensin 3 [Source:HGNC Symbol;Acc:HGNC:21616]	7	47275154	47582558	-1
ENSG00000113163	0.929217	5.36548	20.0374	2.65e-15	5.04e-14	24.5924	10087	COL4A3BP	collagen type IV alpha 3 binding protein [Source:HGNC Symbol;Acc:HGNC:2205]	5	75368486	75512138	-1
ENSG00000064692	-3.05738	1.1482	-19.4906	4.64e-15	8.35e-14	24.5867	9627	SNCAIP	synuclein alpha interacting protein [Source:HGNC Symbol;Acc:HGNC:11139]	5	122311354	122464219	1
ENSG00000273049	-2.32746	2.27405	-19.4299	4.94e-15	8.83e-14	24.5746		RP11-834C11.12		12	53985845	54034888	1
ENSG00000112715	-1.16915	4.48795	-19.8063	3.35e-15	6.2e-14	24.555	7422	VEGFA	vascular endothelial growth factor A [Source:HGNC Symbol;Acc:HGNC:12680]	6	43770184	43786487	1
ENSG00000186047	2.31688	1.64722	19.3841	5.19e-15	9.22e-14	24.5357	220107	DLEU7	deleted in lymphocytic leukemia, 7 [Source:HGNC Symbol;Acc:HGNC:17567]	13	50711008	50843939	-1
ENSG00000164144	0.849188	6.06051	20.0362	2.66e-15	5.04e-14	24.5013	27236	ARFIP1	ADP ribosylation factor interacting protein 1 [Source:HGNC Symbol;Acc:HGNC:21496]	4	152779937	152918463	1
ENSG00000100626	-3.53854	1.66161	-19.3674	5.28e-15	9.35e-14	24.4981	57452	GALNT16	polypeptide N-acetylgalactosaminyltransferase 16 [Source:HGNC Symbol;Acc:HGNC:23233]	14	69259277	69357033	1
ENSG00000101695	2.06409	2.05191	19.3694	5.27e-15	9.34e-14	24.4884	54941	RNF125	ring finger protein 125 [Source:HGNC Symbol;Acc:HGNC:21150]	18	32018372	32073213	1
ENSG00000276398	-8.64617	-0.416464	-19.9861	2.79e-15	5.27e-14	24.4793		RMST_9	Rhabdomyosarcoma 2 associated transcript conserved region 9 [Source:RFAM;Acc:RF01970]	12	97560856	97561048	1
ENSG00000243927	-1.00413	5.58762	-19.9264	2.97e-15	5.54e-14	24.4752	64968	MRPS6	mitochondrial ribosomal protein S6 [Source:HGNC Symbol;Acc:HGNC:14051]	21	34073224	34143034	1
ENSG00000112077	5.59634	-2.64882	20.0325	2.67e-15	5.05e-14	24.4643	6005	RHAG	Rh-associated glycoprotein [Source:HGNC Symbol;Acc:HGNC:10006]	6	49605158	49636839	-1
ENSG00000267312	1.46042	4.2737	19.7079	3.71e-15	6.81e-14	24.4521		RP11-1094M14.7		17	35459481	35460550	-1
ENSG00000272273	-3.75093	1.11651	-19.4074	5.06e-15	9.03e-14	24.4498	105379695	XXbac-BPG252P9.10		6	30742929	30743592	1
ENSG00000114654	-7.80999	-0.719829	-19.9686	2.84e-15	5.36e-14	24.4457	79825	EFCC1	EF-hand and coiled-coil domain containing 1 [Source:HGNC Symbol;Acc:HGNC:25692]	3	129001629	129040742	1
ENSG00000112276	1.32782	3.75008	19.6035	4.13e-15	7.48e-14	24.4425	11149	BVES	blood vessel epicardial substance [Source:HGNC Symbol;Acc:HGNC:1152]	6	105096822	105137174	-1
ENSG00000134802	1.20842	4.19145	19.6781	3.83e-15	6.98e-14	24.4307	29015	SLC43A3	solute carrier family 43 member 3 [Source:HGNC Symbol;Acc:HGNC:17466]	11	57406954	57427580	-1
ENSG00000278802	-8.16551	-0.99561	-19.9476	2.9e-15	5.45e-14	24.4232		RMST_8	Rhabdomyosarcoma 2 associated transcript conserved region 8 [Source:RFAM;Acc:RF01969]	12	97560557	97560721	1
ENSG00000156931	0.840787	6.09927	19.9607	2.87e-15	5.39e-14	24.4176	23355	VPS8	VPS8, CORVET complex subunit [Source:HGNC Symbol;Acc:HGNC:29122]	3	184812143	185052614	1
ENSG00000183840	1.59703	4.73288	19.7533	3.54e-15	6.52e-14	24.4158	2863	GPR39	G protein-coupled receptor 39 [Source:HGNC Symbol;Acc:HGNC:4496]	2	132416574	132646559	1
ENSG00000234420	1.05079	6.17322	19.9429	2.92e-15	5.47e-14	24.3935	100129482	ZNF37BP	zinc finger protein 37B, pseudogene [Source:HGNC Symbol;Acc:HGNC:13103]	10	42513510	42552822	-1
ENSG00000154529	-2.80123	2.07153	-19.2403	6.03e-15	1.06e-13	24.3918	728577 100289279	CNTNAP3B	contactin associated protein-like 3B [Source:HGNC Symbol;Acc:HGNC:32035]	9	41890314	42129510	-1
ENSG00000126709	-1.99793	3.13043	-19.3405	5.43e-15	9.59e-14	24.3664	2537	IFI6	interferon alpha inducible protein 6 [Source:HGNC Symbol;Acc:HGNC:4054]	1	27666061	27672218	-1
ENSG00000119917	1.76823	2.55774	19.3192	5.55e-15	9.79e-14	24.3659	3437	IFIT3	interferon induced protein with tetratricopeptide repeats 3 [Source:HGNC Symbol;Acc:HGNC:5411]	10	89327894	89340971	1
ENSG00000065615	0.969936	4.59347	19.6952	3.76e-15	6.87e-14	24.3655	51167	CYB5R4	cytochrome b5 reductase 4 [Source:HGNC Symbol;Acc:HGNC:20147]	6	83859643	83967424	1
ENSG00000172893	-0.63337	7.97039	-20.0126	2.72e-15	5.15e-14	24.3549	1717	DHCR7	7-dehydrocholesterol reductase [Source:HGNC Symbol;Acc:HGNC:2860]	11	71428193	71452868	-1
ENSG00000156239	0.960057	4.43243	19.6278	4.03e-15	7.31e-14	24.3249	29104	N6AMT1	N-6 adenine-specific DNA methyltransferase 1 (putative) [Source:HGNC Symbol;Acc:HGNC:16021]	21	28872191	28885371	-1
ENSG00000109472	-1.28929	5.05621	-19.665	3.88e-15	7.06e-14	24.3021	1363	CPE	carboxypeptidase E [Source:HGNC Symbol;Acc:HGNC:2303]	4	165361194	165498320	1
ENSG00000136044	0.901235	5.46264	19.7721	3.47e-15	6.41e-14	24.2972	55198	APPL2	adaptor protein, phosphotyrosine interacting with PH domain and leucine zipper 2 [Source:HGNC Symbol;Acc:HGNC:18242]	12	105173296	105236238	-1
ENSG00000267458	-0.784817	6.54494	-19.8641	3.16e-15	5.89e-14	24.2891		CTC-425F1.4		19	12944118	12944487	-1
ENSG00000122861	-4.14855	3.39044	-19.1793	6.43e-15	1.12e-13	24.2837	5328	PLAU	plasminogen activator, urokinase [Source:HGNC Symbol;Acc:HGNC:9052]	10	73909177	73917497	1
ENSG00000162105	-3.6254	1.10124	-19.2266	6.12e-15	1.07e-13	24.2765	22941	SHANK2	SH3 and multiple ankyrin repeat domains 2 [Source:HGNC Symbol;Acc:HGNC:14295]	11	70467856	71252577	-1
ENSG00000164402	0.861908	5.87989	19.8042	3.36e-15	6.21e-14	24.2761	23176	2008-09-01	septin 8 [Source:HGNC Symbol;Acc:HGNC:16511]	5	132750817	132807241	-1
ENSG00000159842	-1.23654	5.49559	-19.706	3.72e-15	6.82e-14	24.2671	29	ABR	active BCR-related [Source:HGNC Symbol;Acc:HGNC:81]	17	1003518	1229021	-1
ENSG00000259040	-0.941284	8.48733	-19.9497	2.9e-15	5.44e-14	24.2652		BLOC1S5-TXNDC5	BLOC1S5-TXNDC5 readthrough (NMD candidate) [Source:HGNC Symbol;Acc:HGNC:42001]	6	7881522	8064364	-1
ENSG00000114529	1.15525	4.98148	19.6642	3.88e-15	7.06e-14	24.2639	79669	C3orf52	chromosome 3 open reading frame 52 [Source:HGNC Symbol;Acc:HGNC:26255]	3	112086335	112131004	1
ENSG00000109339	-1.68159	2.98585	-19.2318	6.08e-15	1.06e-13	24.2556	5602	MAPK10	mitogen-activated protein kinase 10 [Source:HGNC Symbol;Acc:HGNC:6872]	4	86015123	86594131	-1
ENSG00000263424	-2.8591	3.61346	-19.235	6.06e-15	1.06e-13	24.2306		CTD-2541J13.2		18	67506589	67514030	1
ENSG00000187240	-1.18344	6.89746	-19.8262	3.29e-15	6.09e-14	24.2284	79659	DYNC2H1	dynein cytoplasmic 2 heavy chain 1 [Source:HGNC Symbol;Acc:HGNC:2962]	11	103109431	103479863	1
ENSG00000258749	-2.31947	2.74194	-19.1406	6.69e-15	1.16e-13	24.2243		RP11-688G15.3		14	99512501	99513576	1
ENSG00000172936	2.1486	2.0046	19.1119	6.9e-15	1.19e-13	24.221	4615	MYD88	myeloid differentiation primary response 88 [Source:HGNC Symbol;Acc:HGNC:7562]	3	38138478	38143022	1
ENSG00000273570	-6.88474	-1.37587	-19.7568	3.53e-15	6.51e-14	24.2082		RMST_5	Rhabdomyosarcoma 2 associated transcript conserved region 5 [Source:RFAM;Acc:RF01966]	12	97495932	97496057	1
ENSG00000133789	-0.854108	6.01183	-19.7266	3.64e-15	6.69e-14	24.1995	23075	SWAP70	SWAP switching B-cell complex 70kDa subunit [Source:HGNC Symbol;Acc:HGNC:17070]	11	9664077	9752991	1
ENSG00000054793	1.13987	4.38035	19.4855	4.67e-15	8.39e-14	24.1856	10079	ATP9A	ATPase phospholipid transporting 9A (putative) [Source:HGNC Symbol;Acc:HGNC:13540]	20	51596514	51768634	-1
ENSG00000142408	-6.24251	-1.40835	-19.7445	3.57e-15	6.57e-14	24.1751	59283 100126325	CACNG8	calcium voltage-gated channel auxiliary subunit gamma 8 [Source:HGNC Symbol;Acc:HGNC:13628]	19	53963040	53990215	1
ENSG00000250927	-2.41948	2.09149	-19.0369	7.47e-15	1.28e-13	24.172		MESTP3	mesoderm specific transcript pseudogene 3 [Source:HGNC Symbol;Acc:HGNC:38553]	4	28823244	28824211	-1
ENSG00000150867	0.911442	5.02466	19.5784	4.24e-15	7.67e-14	24.1606	5305	PIP4K2A	phosphatidylinositol-5-phosphate 4-kinase type 2 alpha [Source:HGNC Symbol;Acc:HGNC:8997]	10	22534849	22714555	-1
ENSG00000273046	-2.72734	1.96157	-19.0107	7.68e-15	1.31e-13	24.1515		RP11-834C11.14		12	54017110	54035361	1
ENSG00000069849	-0.792203	6.33757	-19.6983	3.75e-15	6.86e-14	24.1319	483	ATP1B3	ATPase Na+/K+ transporting subunit beta 3 [Source:HGNC Symbol;Acc:HGNC:806]	3	141876124	141926514	1
ENSG00000259627	-2.58607	3.75983	-19.1585	6.57e-15	1.14e-13	24.1015		RP11-244F12.2		15	63070025	63071911	-1
ENSG00000099139	-1.81447	2.77761	-19.0485	7.38e-15	1.26e-13	24.0967	5125	PCSK5	proprotein convertase subtilisin/kexin type 5 [Source:HGNC Symbol;Acc:HGNC:8747]	9	75890644	76362339	1
ENSG00000258712	-5.5338	-2.11256	-19.7519	3.55e-15	6.53e-14	24.0824		CXADRP2	coxsackie virus and adenovirus receptor pseudogene 2 [Source:HGNC Symbol;Acc:HGNC:33973]	15	21372793	21373881	-1
ENSG00000138944	-5.13356	0.441364	-19.4408	4.89e-15	8.74e-14	24.0778	85352	KIAA1644	KIAA1644 [Source:HGNC Symbol;Acc:HGNC:29335]	22	44243667	44312851	-1
ENSG00000164076	-2.89856	2.5662	-18.9651	8.06e-15	1.37e-13	24.0773	79012	CAMKV	CaM kinase like vesicle associated [Source:HGNC Symbol;Acc:HGNC:28788]	3	49857988	49870222	-1
ENSG00000237773	5.90658	0.165349	19.2816	5.77e-15	1.01e-13	24.0674		AC003075.4		7	17279834	17299357	-1
ENSG00000130396	-0.774927	6.90527	-19.6706	3.86e-15	7.03e-14	24.0547	4301	AFDN	afadin, adherens junction formation factor [Source:HGNC Symbol;Acc:HGNC:7137]	6	167826922	167972023	1
ENSG00000138835	-1.39661	5.07943	-19.3989	5.11e-15	9.09e-14	24.0191	5998	RGS3	regulator of G-protein signaling 3 [Source:HGNC Symbol;Acc:HGNC:9999]	9	113444731	113597743	1
ENSG00000162493	-3.13191	2.17769	-18.8856	8.77e-15	1.47e-13	24.0179	10630	PDPN	podoplanin [Source:HGNC Symbol;Acc:HGNC:29602]	1	13583465	13617957	1
ENSG00000198682	-2.7317	2.47973	-18.9079	8.57e-15	1.44e-13	24.0175	9060	PAPSS2	3'-phosphoadenosine 5'-phosphosulfate synthase 2 [Source:HGNC Symbol;Acc:HGNC:8604]	10	87659613	87747705	1
ENSG00000179981	-1.34502	3.58578	-19.1162	6.87e-15	1.18e-13	24.0052	10194	TSHZ1	teashirt zinc finger homeobox 1 [Source:HGNC Symbol;Acc:HGNC:10669]	18	75210755	75289950	1
ENSG00000249835	-0.826043	6.84786	-19.5469	4.38e-15	7.89e-14	23.9268	105379054	VCAN-AS1	VCAN antisense RNA 1 [Source:HGNC Symbol;Acc:HGNC:40163]	5	83531352	83581320	-1
ENSG00000134115	6.04958	-2.31083	19.349	5.38e-15	9.51e-14	23.9263	27255	CNTN6	contactin 6 [Source:HGNC Symbol;Acc:HGNC:2176]	3	1092576	1404217	1
ENSG00000241231	5.91203	-2.37649	19.3659	5.29e-15	9.36e-14	23.9262		RP11-275H4.1		3	181421058	181442486	-1
ENSG00000135679	0.838847	8.16399	19.6242	4.04e-15	7.33e-14	23.9255	4193	MDM2	MDM2 proto-oncogene [Source:HGNC Symbol;Acc:HGNC:6973]	12	68808176	68850686	1
ENSG00000078549	-2.60397	1.66324	-18.7957	9.66e-15	1.6e-13	23.9233	117	ADCYAP1R1	ADCYAP receptor type I [Source:HGNC Symbol;Acc:HGNC:242]	7	31052461	31111479	1
ENSG00000102362	3.46538	0.00269758	18.9522	8.17e-15	1.38e-13	23.922	94121	SYTL4	synaptotagmin like 4 [Source:HGNC Symbol;Acc:HGNC:15588]	X	100674491	100732123	-1
ENSG00000091986	-0.834255	5.92705	-19.4554	4.82e-15	8.63e-14	23.9183	151887	CCDC80	coiled-coil domain containing 80 [Source:HGNC Symbol;Acc:HGNC:30649]	3	112596794	112649530	-1
ENSG00000184588	-2.82314	2.13753	-18.7635	1e-14	1.65e-13	23.8847	5142	PDE4B	phosphodiesterase 4B [Source:HGNC Symbol;Acc:HGNC:8781]	1	65792514	66374579	1
ENSG00000181467	0.709261	6.03405	19.4408	4.89e-15	8.74e-14	23.8683	5912	RAP2B	RAP2B, member of RAS oncogene family [Source:HGNC Symbol;Acc:HGNC:9862]	3	153162270	153170620	1
ENSG00000116132	-3.96959	1.31357	-18.8142	9.47e-15	1.57e-13	23.8671	5396	PRRX1	paired related homeobox 1 [Source:HGNC Symbol;Acc:HGNC:9142]	1	170662728	170739419	1
ENSG00000181449	-1.51282	6.58553	-19.4469	4.86e-15	8.7e-14	23.8593	6657	SOX2	SRY-box 2 [Source:HGNC Symbol;Acc:HGNC:11195]	3	181711924	181714436	1
ENSG00000128268	-1.64157	3.99224	-19.0381	7.46e-15	1.28e-13	23.8587	4248	MGAT3	mannosyl (beta-1,4-)-glycoprotein beta-1,4-N-acetylglucosaminyltransferase [Source:HGNC Symbol;Acc:HGNC:7046]	22	39457344	39492194	1
ENSG00000106608	0.879568	5.15636	19.3074	5.62e-15	9.89e-14	23.8454	55665	URGCP	upregulator of cell proliferation [Source:HGNC Symbol;Acc:HGNC:30890]	7	43875894	43926411	-1
ENSG00000140285	5.35556	-0.269355	19.1228	6.82e-15	1.18e-13	23.8404	2252	FGF7	fibroblast growth factor 7 [Source:HGNC Symbol;Acc:HGNC:3685]	15	49423096	49488775	1
ENSG00000085117	-3.75055	3.67416	-18.821	9.4e-15	1.56e-13	23.8374	3732	CD82	CD82 molecule [Source:HGNC Symbol;Acc:HGNC:6210]	11	44564427	44620363	1
ENSG00000171316	0.652834	8.27413	19.536	4.43e-15	7.98e-14	23.8256	55636	CHD7	chromodomain helicase DNA binding protein 7 [Source:HGNC Symbol;Acc:HGNC:20626]	8	60678778	60868028	1
ENSG00000173744	0.761262	7.03652	19.4718	4.73e-15	8.49e-14	23.8223	3267	AGFG1	ArfGAP with FG repeats 1 [Source:HGNC Symbol;Acc:HGNC:5175]	2	227472152	227561214	1
ENSG00000227227	1.51681	3.33052	18.9449	8.24e-15	1.39e-13	23.8187		AC017101.10		2	186641339	186695287	-1
ENSG00000161638	-1.14089	5.50899	-19.2868	5.74e-15	1.01e-13	23.8087	3678	ITGA5	integrin subunit alpha 5 [Source:HGNC Symbol;Acc:HGNC:6141]	12	54395261	54419460	-1
ENSG00000119042	-1.29652	4.14268	-19.0359	7.48e-15	1.28e-13	23.803	23314	SATB2	SATB homeobox 2 [Source:HGNC Symbol;Acc:HGNC:21637]	2	199269500	199471266	-1
ENSG00000150551	1.61481	5.11759	19.2437	6.01e-15	1.05e-13	23.7994	116372	LYPD1	LY6/PLAUR domain containing 1 [Source:HGNC Symbol;Acc:HGNC:28431]	2	132644853	132671579	-1
ENSG00000120094	-6.3007	-1.37774	-19.3129	5.59e-15	9.84e-14	23.7902	3211	HOXB1	homeobox B1 [Source:HGNC Symbol;Acc:HGNC:5111]	17	48528526	48530997	-1
ENSG00000074590	-1.11479	6.729	-19.4061	5.07e-15	9.03e-14	23.7902	9891	NUAK1	NUAK family kinase 1 [Source:HGNC Symbol;Acc:HGNC:14311]	12	106063340	106140033	-1
ENSG00000150687	1.70096	6.25082	19.3742	5.24e-15	9.3e-14	23.7881	11098	PRSS23	protease, serine 23 [Source:HGNC Symbol;Acc:HGNC:14370]	11	86791059	86952910	1
ENSG00000069188	-1.65152	4.46131	-19.0569	7.31e-15	1.26e-13	23.7851	54549	SDK2	sidekick cell adhesion molecule 2 [Source:HGNC Symbol;Acc:HGNC:19308]	17	73334384	73644089	-1
ENSG00000137193	-1.74532	3.14557	-18.8177	9.43e-15	1.57e-13	23.7839	5292	PIM1	Pim-1 proto-oncogene, serine/threonine kinase [Source:HGNC Symbol;Acc:HGNC:8986]	6	37170203	37175426	1
ENSG00000081087	0.828294	5.81145	19.3264	5.51e-15	9.72e-14	23.7706	28962	OSTM1	osteopetrosis associated transmembrane protein 1 [Source:HGNC Symbol;Acc:HGNC:21652]	6	108041409	108165854	-1
ENSG00000136237	-2.86941	3.00495	-18.7232	1.04e-14	1.71e-13	23.7679	9771	RAPGEF5	Rap guanine nucleotide exchange factor 5 [Source:HGNC Symbol;Acc:HGNC:16862]	7	22118238	22357144	-1
ENSG00000125851	-6.65979	0.247439	-19.1851	6.39e-15	1.11e-13	23.7464	5126	PCSK2	proprotein convertase subtilisin/kexin type 2 [Source:HGNC Symbol;Acc:HGNC:8744]	20	17226107	17484578	1
ENSG00000196549	-7.0888	0.837738	-19.163	6.54e-15	1.14e-13	23.7396	4311	MME	membrane metallo-endopeptidase [Source:HGNC Symbol;Acc:HGNC:7154]	3	155024124	155183729	1
ENSG00000149328	1.08926	4.04609	19.0104	7.68e-15	1.31e-13	23.7367	89944	GLB1L2	galactosidase beta 1 like 2 [Source:HGNC Symbol;Acc:HGNC:25129]	11	134331874	134378341	1
ENSG00000104205	1.84217	2.13007	18.6808	1.09e-14	1.78e-13	23.7359	23678	SGK3	serum/glucocorticoid regulated kinase family member 3 [Source:HGNC Symbol;Acc:HGNC:10812]	8	66712418	66862022	1
ENSG00000125249	0.797659	7.12722	19.3794	5.21e-15	9.26e-14	23.7168	5911	RAP2A	RAP2A, member of RAS oncogene family [Source:HGNC Symbol;Acc:HGNC:9861]	13	97434222	97469128	1
ENSG00000130707	-3.36251	2.2864	-18.6044	1.19e-14	1.92e-13	23.7157	445	ASS1	argininosuccinate synthase 1 [Source:HGNC Symbol;Acc:HGNC:758]	9	130444929	130501274	1
ENSG00000141622	0.901739	5.05734	19.1532	6.61e-15	1.14e-13	23.6944	494470	RNF165	ring finger protein 165 [Source:HGNC Symbol;Acc:HGNC:31696]	18	46326809	46463140	1
ENSG00000038427	-0.741402	10.5094	-19.4768	4.71e-15	8.46e-14	23.6803	1462	VCAN	versican [Source:HGNC Symbol;Acc:HGNC:2464]	5	83471465	83582303	1
ENSG00000231999	1.91291	2.10127	18.6214	1.16e-14	1.89e-13	23.6757	400761	FLJ27354	uncharacterized LOC400761 [Source:EntrezGene;Acc:400761]	1	89583241	89632894	-1
ENSG00000153233	-5.89401	-1.59552	-19.2167	6.18e-15	1.08e-13	23.672	5801	PTPRR	protein tyrosine phosphatase, receptor type R [Source:HGNC Symbol;Acc:HGNC:9680]	12	70638073	70920843	-1
ENSG00000104059	-2.24324	3.30487	-18.7068	1.06e-14	1.74e-13	23.6653	23359	FAM189A1	family with sequence similarity 189 member A1 [Source:HGNC Symbol;Acc:HGNC:29075]	15	29120254	29570723	-1
ENSG00000166091	5.3937	0.221395	18.7849	9.77e-15	1.61e-13	23.6595	116173	CMTM5	CKLF like MARVEL transmembrane domain containing 5 [Source:HGNC Symbol;Acc:HGNC:19176]	14	23376808	23379772	1
ENSG00000107521	1.63633	3.70399	18.8649	8.97e-15	1.5e-13	23.6594	3257	HPS1	HPS1, biogenesis of lysosomal organelles complex 3 subunit 1 [Source:HGNC Symbol;Acc:HGNC:5163]	10	98416198	98446947	-1
ENSG00000272163	-5.8272	3.08068	-18.5489	1.26e-14	2.03e-13	23.6579		GS1-72M22.1		8	24912165	24914717	-1
ENSG00000186998	-3.96242	2.02105	-18.5468	1.26e-14	2.04e-13	23.6522	129080	EMID1	EMI domain containing 1 [Source:HGNC Symbol;Acc:HGNC:18036]	22	29205851	29259597	1
ENSG00000166123	-0.898727	5.07834	-19.0806	7.13e-15	1.23e-13	23.6448	84706	GPT2	glutamic--pyruvic transaminase 2 [Source:HGNC Symbol;Acc:HGNC:18062]	16	46884378	46931297	1
ENSG00000181652	-2.63085	1.37477	-18.543	1.27e-14	2.04e-13	23.6443	285973	ATG9B	autophagy related 9B [Source:HGNC Symbol;Acc:HGNC:21899]	7	151012209	151024499	-1
ENSG00000154493	7.14963	-0.0631023	18.8925	8.71e-15	1.46e-13	23.6406	118611	C10orf90	chromosome 10 open reading frame 90 [Source:HGNC Symbol;Acc:HGNC:26563]	10	126424997	126670446	-1
ENSG00000101327	-3.47026	1.52375	-18.5426	1.27e-14	2.04e-13	23.6313	5173	PDYN	prodynorphin [Source:HGNC Symbol;Acc:HGNC:8820]	20	1978757	1994285	-1
ENSG00000076716	1.45086	3.21837	18.7509	1.01e-14	1.67e-13	23.6255	2239	GPC4	glypican 4 [Source:HGNC Symbol;Acc:HGNC:4452]	X	133300103	133415490	-1
ENSG00000112290	-0.956276	4.40161	-18.9376	8.3e-15	1.4e-13	23.6226	8936	WASF1	WAS protein family member 1 [Source:HGNC Symbol;Acc:HGNC:12732]	6	110099819	110180004	-1
ENSG00000109919	0.746123	6.94735	19.2792	5.79e-15	1.02e-13	23.6188	23788	MTCH2	mitochondrial carrier 2 [Source:HGNC Symbol;Acc:HGNC:17587]	11	47617315	47642623	-1
ENSG00000170775	1.81185	2.42535	18.6081	1.18e-14	1.92e-13	23.6155	2861	GPR37	G protein-coupled receptor 37 [Source:HGNC Symbol;Acc:HGNC:4494]	7	124745997	124765627	-1
ENSG00000165943	0.886025	4.74953	19.0226	7.58e-15	1.29e-13	23.6069	64112	MOAP1	modulator of apoptosis 1 [Source:HGNC Symbol;Acc:HGNC:16658]	14	93182196	93184928	-1
ENSG00000270106	0.882337	5.01755	19.0603	7.29e-15	1.25e-13	23.5993		TSNAX-DISC1	TSNAX-DISC1 readthrough (NMD candidate) [Source:HGNC Symbol;Acc:HGNC:49177]	1	231528653	231819244	1
ENSG00000142327	1.4369	3.43905	18.764	9.99e-15	1.65e-13	23.5961		RNPEPL1	arginyl aminopeptidase like 1 [Source:HGNC Symbol;Acc:HGNC:10079]	2	240565804	240581372	1
ENSG00000260057	-5.94461	-1.88897	-19.1458	6.66e-15	1.15e-13	23.5831	101927364	LINC01571	long intergenic non-protein coding RNA 1571 [Source:HGNC Symbol;Acc:HGNC:51384]	16	51762519	51773173	1
ENSG00000170456	0.811924	6.12512	19.1711	6.48e-15	1.13e-13	23.5661	160518	DENND5B	DENN domain containing 5B [Source:HGNC Symbol;Acc:HGNC:28338]	12	31382223	31591097	-1
ENSG00000197301	2.21071	2.74823	18.5891	1.21e-14	1.96e-13	23.5554	100129940	RP11-366L20.2		12	65851340	65882167	-1
ENSG00000151552	1.30019	4.62584	18.9466	8.22e-15	1.39e-13	23.5543	5860	QDPR	quinoid dihydropteridine reductase [Source:HGNC Symbol;Acc:HGNC:9752]	4	17460261	17512234	-1
ENSG00000138821	-1.49487	4.71636	-18.8978	8.66e-15	1.45e-13	23.5477	64116	SLC39A8	solute carrier family 39 member 8 [Source:HGNC Symbol;Acc:HGNC:20862]	4	102251041	102431258	-1
ENSG00000174145	-5.49941	0.0920512	-18.9919	7.84e-15	1.33e-13	23.5469	57495	NWD2	NACHT and WD repeat domain containing 2 [Source:HGNC Symbol;Acc:HGNC:29229]	4	37244220	37449465	1
ENSG00000131969	-2.08242	2.63522	-18.5015	1.33e-14	2.11e-13	23.5312	145447	ABHD12B	abhydrolase domain containing 12B [Source:HGNC Symbol;Acc:HGNC:19837]	14	50872160	50904970	1
ENSG00000146648	-4.1571	1.64246	-18.4608	1.39e-14	2.2e-13	23.5277	1956	EGFR	epidermal growth factor receptor [Source:HGNC Symbol;Acc:HGNC:3236]	7	55019021	55211628	1
ENSG00000118513	1.77286	2.32581	18.5157	1.31e-14	2.09e-13	23.5271	4602	MYB	MYB proto-oncogene, transcription factor [Source:HGNC Symbol;Acc:HGNC:7545]	6	135181315	135219173	1
ENSG00000130522	-1.05059	4.94057	-18.9408	8.27e-15	1.39e-13	23.5247	3727	JUND	JunD proto-oncogene, AP-1 transcription factor subunit [Source:HGNC Symbol;Acc:HGNC:6206]	19	18279760	18281622	-1
ENSG00000163126	0.984935	4.14131	18.8297	9.31e-15	1.55e-13	23.5165	200539	ANKRD23	ankyrin repeat domain 23 [Source:HGNC Symbol;Acc:HGNC:24470]	2	96824526	96857934	-1
ENSG00000114853	-1.94475	2.86162	-18.5219	1.3e-14	2.08e-13	23.5154	92999	ZBTB47	zinc finger and BTB domain containing 47 [Source:HGNC Symbol;Acc:HGNC:26955]	3	42653684	42665854	1
ENSG00000145284	-1.22316	4.64608	-18.8551	9.06e-15	1.51e-13	23.4974	79966	SCD5	stearoyl-CoA desaturase 5 [Source:HGNC Symbol;Acc:HGNC:21088]	4	82629539	82798857	-1
ENSG00000084112	0.747602	5.57265	19.0438	7.42e-15	1.27e-13	23.4923	54434	SSH1	slingshot protein phosphatase 1 [Source:HGNC Symbol;Acc:HGNC:30579]	12	108778192	108857590	-1
ENSG00000164946	0.834501	7.15135	19.172	6.48e-15	1.13e-13	23.4893	158326	FREM1	FRAS1 related extracellular matrix 1 [Source:HGNC Symbol;Acc:HGNC:23399]	9	14734666	14910995	-1
ENSG00000167565	-0.973368	4.48912	-18.8293	9.32e-15	1.55e-13	23.4861	29946	SERTAD3	SERTA domain containing 3 [Source:HGNC Symbol;Acc:HGNC:17931]	19	40440844	40444705	-1
ENSG00000154096	1.34674	6.48847	19.1189	6.85e-15	1.18e-13	23.4807	7070	THY1	Thy-1 cell surface antigen [Source:HGNC Symbol;Acc:HGNC:11801]	11	119417378	119424985	-1
ENSG00000110619	-0.697296	5.99648	-19.0653	7.25e-15	1.25e-13	23.4803	833	CARS	cysteinyl-tRNA synthetase [Source:HGNC Symbol;Acc:HGNC:1493]	11	3000922	3057613	-1
ENSG00000158792	-1.78314	2.93393	-18.4937	1.34e-14	2.13e-13	23.464	124044	SPATA2L	spermatogenesis associated 2 like [Source:HGNC Symbol;Acc:HGNC:28393]	16	89696343	89701705	-1
ENSG00000116774	-1.80791	3.31257	-18.5315	1.28e-14	2.06e-13	23.441	56944	OLFML3	olfactomedin like 3 [Source:HGNC Symbol;Acc:HGNC:24956]	1	113979391	114035572	1
ENSG00000132640	0.684867	8.07339	19.172	6.48e-15	1.13e-13	23.4399	22903	BTBD3	BTB domain containing 3 [Source:HGNC Symbol;Acc:HGNC:15854]	20	11890723	11926609	1
ENSG00000234456	0.979517	5.54667	18.9896	7.85e-15	1.33e-13	23.4386	100505881	MAGI2-AS3	MAGI2 antisense RNA 3 [Source:HGNC Symbol;Acc:HGNC:40862]	7	79452877	79471208	1
ENSG00000099282	1.98753	3.30937	18.5786	1.22e-14	1.97e-13	23.4326	23555	TSPAN15	tetraspanin 15 [Source:HGNC Symbol;Acc:HGNC:23298]	10	69451473	69507669	1
ENSG00000250742	-1.12984	4.27065	-18.7326	1.03e-14	1.7e-13	23.4325	400043	RP11-834C11.4		12	54126098	54142493	1
ENSG00000167178	-3.23024	1.41219	-18.3546	1.56e-14	2.44e-13	23.4305	57611	ISLR2	immunoglobulin superfamily containing leucine rich repeat 2 [Source:HGNC Symbol;Acc:HGNC:29286]	15	74100311	74138540	1
ENSG00000102804	-0.7601	6.51676	-19.0537	7.34e-15	1.26e-13	23.4155	8848	TSC22D1	TSC22 domain family member 1 [Source:HGNC Symbol;Acc:HGNC:16826]	13	44432143	44577147	-1
ENSG00000144229	-5.59192	-0.235821	-18.8599	9.02e-15	1.5e-13	23.4122	80731	THSD7B	thrombospondin type 1 domain containing 7B [Source:HGNC Symbol;Acc:HGNC:29348]	2	136765545	137677717	1
ENSG00000013563	-1.79321	2.99786	-18.4506	1.4e-14	2.22e-13	23.406	1774	DNASE1L1	deoxyribonuclease 1 like 1 [Source:HGNC Symbol;Acc:HGNC:2957]	X	154401238	154412112	-1
ENSG00000108511	-0.926923	5.71983	-18.9297	8.37e-15	1.41e-13	23.3753	3216	HOXB6	homeobox B6 [Source:HGNC Symbol;Acc:HGNC:5117]	17	48595751	48604992	-1
ENSG00000153317	0.779409	5.76498	18.9598	8.11e-15	1.37e-13	23.3744	50807	ASAP1	ArfGAP with SH3 domain, ankyrin repeat and PH domain 1 [Source:HGNC Symbol;Acc:HGNC:2720]	8	130052104	130443660	-1
ENSG00000087245	0.923642	6.62984	19.0348	7.49e-15	1.28e-13	23.3732	4313	MMP2	matrix metallopeptidase 2 [Source:HGNC Symbol;Acc:HGNC:7166]	16	55389700	55506691	1
ENSG00000204381	3.55152	0.146785	18.383	1.51e-14	2.37e-13	23.3655	143903	LAYN	layilin [Source:HGNC Symbol;Acc:HGNC:29471]	11	111540280	111561745	1
ENSG00000204934	1.25181	4.3445	18.7206	1.05e-14	1.71e-13	23.3584	401431	ATP6V0E2-AS1	ATP6V0E2 antisense RNA 1 [Source:HGNC Symbol;Acc:HGNC:44180]	7	149867697	149880610	-1
ENSG00000153993	2.1296	2.14577	18.3197	1.62e-14	2.52e-13	23.3416	223117	SEMA3D	semaphorin 3D [Source:HGNC Symbol;Acc:HGNC:10726]	7	84995553	85186855	-1
ENSG00000196116	3.46256	1.07938	18.2549	1.74e-14	2.7e-13	23.3347	23424	TDRD7	tudor domain containing 7 [Source:HGNC Symbol;Acc:HGNC:30831]	9	97411950	97496125	1
ENSG00000151612	-1.35795	3.8153	-18.5411	1.27e-14	2.04e-13	23.3261	152485	ZNF827	zinc finger protein 827 [Source:HGNC Symbol;Acc:HGNC:27193]	4	145757627	145938635	-1
ENSG00000261069	-1.00216	5.57511	-18.8603	9.01e-15	1.5e-13	23.3232		RP11-701H24.4		15	25087661	25088896	1
ENSG00000135318	2.35773	1.44825	18.2388	1.77e-14	2.74e-13	23.3153	4907	NT5E	5'-nucleotidase ecto [Source:HGNC Symbol;Acc:HGNC:8021]	6	85449584	85495791	1
ENSG00000140463	-0.982721	4.819	-18.7324	1.03e-14	1.7e-13	23.3131	585	BBS4	Bardet-Biedl syndrome 4 [Source:HGNC Symbol;Acc:HGNC:969]	15	72686179	72738476	1
ENSG00000136026	-0.647769	7.55385	-19.019	7.61e-15	1.3e-13	23.3057	10970	CKAP4	cytoskeleton associated protein 4 [Source:HGNC Symbol;Acc:HGNC:16991]	12	106237877	106304279	-1
ENSG00000143702	0.766454	7.07169	18.9945	7.81e-15	1.33e-13	23.2989	9859 645455	CEP170	centrosomal protein 170 [Source:HGNC Symbol;Acc:HGNC:28920]	1	243124428	243255348	-1
ENSG00000001036	-0.982826	5.54082	-18.8095	9.52e-15	1.58e-13	23.2712	2519	FUCA2	fucosidase, alpha-L- 2, plasma [Source:HGNC Symbol;Acc:HGNC:4008]	6	143494811	143511690	-1
ENSG00000078269	-2.96038	1.59357	-18.193	1.86e-14	2.87e-13	23.2702	8871	SYNJ2	synaptojanin 2 [Source:HGNC Symbol;Acc:HGNC:11504]	6	157981887	158099176	1
ENSG00000160410	1.14022	4.44411	18.654	1.12e-14	1.83e-13	23.2616	92799	SHKBP1	SH3KBP1 binding protein 1 [Source:HGNC Symbol;Acc:HGNC:19214]	19	40576851	40591399	1
ENSG00000264985	4.26681	-0.00381213	18.339	1.58e-14	2.48e-13	23.2452	101928251	RP11-449L23.2		17	73513612	73521407	1
ENSG00000176907	-5.9869	0.198319	-18.6585	1.12e-14	1.82e-13	23.2399	56892	C8orf4	chromosome 8 open reading frame 4 [Source:HGNC Symbol;Acc:HGNC:1357]	8	40153455	40155308	1
ENSG00000112419	0.76991	6.35198	18.8893	8.74e-15	1.47e-13	23.234	9749	PHACTR2	phosphatase and actin regulator 2 [Source:HGNC Symbol;Acc:HGNC:20956]	6	143536845	143831185	1
ENSG00000163081	-3.77562	0.567661	-18.3221	1.61e-14	2.52e-13	23.229	151278	CCDC140	coiled-coil domain containing 140 [Source:HGNC Symbol;Acc:HGNC:26514]	2	222298147	222305217	1
ENSG00000019505	-4.85018	0.322144	-18.5208	1.3e-14	2.08e-13	23.2063	57586	SYT13	synaptotagmin 13 [Source:HGNC Symbol;Acc:HGNC:14962]	11	45240301	45286319	-1
ENSG00000237036	-3.97856	1.30883	-18.1836	1.88e-14	2.9e-13	23.2039		ZEB1-AS1	ZEB1 antisense RNA 1 [Source:HGNC Symbol;Acc:HGNC:42354]	10	31206278	31320447	-1
ENSG00000253837	-2.03569	2.71483	-18.2171	1.81e-14	2.81e-13	23.2015	100507156	RP11-177H13.2		8	23336171	23366125	1
ENSG00000153721	-1.05835	4.58878	-18.5856	1.21e-14	1.96e-13	23.1986	154043	CNKSR3	CNKSR family member 3 [Source:HGNC Symbol;Acc:HGNC:23034]	6	154387504	154510659	-1
ENSG00000254087	-1.33822	3.95095	-18.449	1.4e-14	2.22e-13	23.1939	4067	LYN	LYN proto-oncogene, Src family tyrosine kinase [Source:HGNC Symbol;Acc:HGNC:6735]	8	55879813	56014168	1
ENSG00000141298	0.762058	5.32104	18.7362	1.03e-14	1.69e-13	23.1888	85464	SSH2	slingshot protein phosphatase 2 [Source:HGNC Symbol;Acc:HGNC:30580]	17	29625938	29930276	-1
ENSG00000107105	-1.42841	4.5756	-18.5387	1.27e-14	2.05e-13	23.1716	1993	ELAVL2	ELAV like neuron-specific RNA binding protein 2 [Source:HGNC Symbol;Acc:HGNC:3313]	9	23690104	23826337	-1
ENSG00000244509	1.99882	2.46135	18.209	1.83e-14	2.83e-13	23.1701	27350	APOBEC3C	apolipoprotein B mRNA editing enzyme catalytic subunit 3C [Source:HGNC Symbol;Acc:HGNC:17353]	22	39014083	39020352	1
ENSG00000106012	-1.34828	4.05071	-18.4428	1.41e-14	2.24e-13	23.1669	23288	IQCE	IQ motif containing E [Source:HGNC Symbol;Acc:HGNC:29171]	7	2558972	2614734	1
ENSG00000128594	0.864921	6.04495	18.7935	9.68e-15	1.6e-13	23.1579	64101	LRRC4	leucine rich repeat containing 4 [Source:HGNC Symbol;Acc:HGNC:15586]	7	128027071	128032107	-1
ENSG00000065150	-0.622989	8.9452	-18.9454	8.23e-15	1.39e-13	23.1556	3843	IPO5	importin 5 [Source:HGNC Symbol;Acc:HGNC:6402]	13	97953658	98024297	1
ENSG00000070770	0.730948	6.47966	18.8229	9.38e-15	1.56e-13	23.1493	1459	CSNK2A2	casein kinase 2 alpha 2 [Source:HGNC Symbol;Acc:HGNC:2459]	16	58157907	58197920	-1
ENSG00000176720	-1.93098	3.76261	-18.3335	1.59e-14	2.49e-13	23.1415	666	BOK	BOK, BCL2 family apoptosis regulator [Source:HGNC Symbol;Acc:HGNC:1087]	2	241558721	241574138	1
ENSG00000197385	3.58555	0.652963	18.1044	2.05e-14	3.14e-13	23.1405	344787	ZNF860	zinc finger protein 860 [Source:HGNC Symbol;Acc:HGNC:34513]	3	31981771	31991628	1
ENSG00000278909	-3.66544	0.918871	-18.1533	1.94e-14	2.99e-13	23.1343		RP11-401P9.7		16	50555355	50558719	1
ENSG00000183624	-0.853575	5.45962	-18.6732	1.1e-14	1.8e-13	23.126	56941	HMCES	5-hydroxymethylcytosine binding, ES cell specific [Source:HGNC Symbol;Acc:HGNC:24446]	3	129278828	129306186	1
ENSG00000127990	-1.01128	4.69162	-18.5333	1.28e-14	2.06e-13	23.1167	8910	SGCE	sarcoglycan epsilon [Source:HGNC Symbol;Acc:HGNC:10808]	7	94585230	94656209	-1
ENSG00000173482	-1.55738	3.11341	-18.2206	1.8e-14	2.8e-13	23.1141	5797	PTPRM	protein tyrosine phosphatase, receptor type M [Source:HGNC Symbol;Acc:HGNC:9675]	18	7566782	8406861	1
ENSG00000176399	-2.93482	2.52699	-18.0792	2.11e-14	3.22e-13	23.1113	63951	DMRTA1	DMRT like family A1 [Source:HGNC Symbol;Acc:HGNC:13826]	9	22446841	22455740	1
ENSG00000166501	-5.6778	0.719765	-18.4088	1.47e-14	2.31e-13	23.0955	5579	PRKCB	protein kinase C beta [Source:HGNC Symbol;Acc:HGNC:9395]	16	23836001	24220611	1
ENSG00000145882	0.984526	4.15672	18.4486	1.41e-14	2.22e-13	23.0874	78991	PCYOX1L	prenylcysteine oxidase 1 like [Source:HGNC Symbol;Acc:HGNC:28477]	5	149358007	149369653	1
ENSG00000116560	0.59046	9.35551	18.8844	8.78e-15	1.47e-13	23.0667	6421	SFPQ	splicing factor proline and glutamine rich [Source:HGNC Symbol;Acc:HGNC:10774]	1	35176378	35193148	-1
ENSG00000165801	-0.807235	7.44403	-18.7938	9.68e-15	1.6e-13	23.0635	55701	ARHGEF40	Rho guanine nucleotide exchange factor 40 [Source:HGNC Symbol;Acc:HGNC:25516]	14	21070270	21090240	1
ENSG00000120658	1.47899	3.54982	18.2977	1.66e-14	2.58e-13	23.0529	55068	ENOX1	ecto-NOX disulfide-thiol exchanger 1 [Source:HGNC Symbol;Acc:HGNC:25474]	13	43213518	43786908	-1
ENSG00000182492	-2.46177	3.19835	-18.1163	2.02e-14	3.1e-13	23.0381	633	BGN	biglycan [Source:HGNC Symbol;Acc:HGNC:1044]	X	153494939	153509554	1
ENSG00000186480	-0.675412	8.30879	-18.8124	9.49e-15	1.57e-13	23.0374	3638	INSIG1	insulin induced gene 1 [Source:HGNC Symbol;Acc:HGNC:6083]	7	155297776	155310235	1
ENSG00000110063	0.899111	4.77208	18.5138	1.31e-14	2.09e-13	23.0364	28960	DCPS	decapping enzyme, scavenger [Source:HGNC Symbol;Acc:HGNC:29812]	11	126303752	126345749	1
ENSG00000239306	0.86953	6.72416	18.7276	1.04e-14	1.7e-13	23.025	10432	RBM14	RNA binding motif protein 14 [Source:HGNC Symbol;Acc:HGNC:14219]	11	66616582	66627347	1
ENSG00000129003	0.85578	6.64286	18.7113	1.06e-14	1.73e-13	23.0127	54832	VPS13C	vacuolar protein sorting 13 homolog C [Source:HGNC Symbol;Acc:HGNC:23594]	15	61852389	62060473	-1
ENSG00000147027	-1.2038	4.65495	-18.3886	1.5e-14	2.36e-13	22.9719	83604	TMEM47	transmembrane protein 47 [Source:HGNC Symbol;Acc:HGNC:18515]	X	34627064	34657288	-1
ENSG00000109738	1.70869	2.25265	18.0056	2.29e-14	3.46e-13	22.9646	2743	GLRB	glycine receptor beta [Source:HGNC Symbol;Acc:HGNC:4329]	4	157076057	157172090	1
ENSG00000172167	1.00466	5.17075	18.5062	1.32e-14	2.11e-13	22.9578	27085	MTBP	MDM2 binding protein [Source:HGNC Symbol;Acc:HGNC:7417]	8	120445400	120542133	1
ENSG00000144589	-1.04252	4.54822	-18.3609	1.55e-14	2.42e-13	22.9533	114790	STK11IP	serine/threonine kinase 11 interacting protein [Source:HGNC Symbol;Acc:HGNC:19184]	2	219597860	219616451	1
ENSG00000198203	-5.21971	-0.477294	-18.3959	1.49e-14	2.34e-13	22.9496	6819	SULT1C2	sulfotransferase family 1C member 2 [Source:HGNC Symbol;Acc:HGNC:11456]	2	108288639	108309915	1
ENSG00000132561	1.61613	3.34504	18.16	1.93e-14	2.97e-13	22.9419	4147	MATN2	matrilin 2 [Source:HGNC Symbol;Acc:HGNC:6908]	8	97868840	98036716	1
ENSG00000144152	-2.47425	2.01287	-17.8927	2.6e-14	3.86e-13	22.9266	129804	FBLN7	fibulin 7 [Source:HGNC Symbol;Acc:HGNC:26740]	2	112138385	112188216	1
ENSG00000214814	-5.67014	-2.03543	-18.4712	1.37e-14	2.18e-13	22.9262	654463	FER1L6	fer-1 like family member 6 [Source:HGNC Symbol;Acc:HGNC:28065]	8	123851987	124120061	1
ENSG00000119698	-3.69413	0.545986	-18.0244	2.24e-14	3.39e-13	22.9217	57718	PPP4R4	protein phosphatase 4 regulatory subunit 4 [Source:HGNC Symbol;Acc:HGNC:23788]	14	94146128	94279735	1
ENSG00000165983	1.07129	4.36587	18.3383	1.59e-14	2.48e-13	22.9207	9317	PTER	phosphotriesterase related [Source:HGNC Symbol;Acc:HGNC:9590]	10	16436943	16513745	1
ENSG00000066629	-0.893717	4.81884	-18.3868	1.5e-14	2.36e-13	22.9202	2009	EML1	echinoderm microtubule associated protein like 1 [Source:HGNC Symbol;Acc:HGNC:3330]	14	99737693	99942060	1
ENSG00000075884	3.28461	1.34908	17.8682	2.67e-14	3.95e-13	22.9131	55843	ARHGAP15	Rho GTPase activating protein 15 [Source:HGNC Symbol;Acc:HGNC:21030]	2	143091362	143768352	1
ENSG00000146122	0.788323	5.01979	18.4408	1.42e-14	2.24e-13	22.9075	23500	DAAM2	dishevelled associated activator of morphogenesis 2 [Source:HGNC Symbol;Acc:HGNC:18143]	6	39792298	39904877	1
ENSG00000155660	-0.59362	8.21732	-18.6899	1.08e-14	1.77e-13	22.9045	9601	PDIA4	protein disulfide isomerase family A member 4 [Source:HGNC Symbol;Acc:HGNC:30167]	7	149003062	149028641	-1
ENSG00000232650	-6.59864	-0.571991	-18.3209	1.62e-14	2.52e-13	22.8981		RP5-834N19.1		1	119328176	119356182	1
ENSG00000120913	-1.76552	3.34074	-18.0512	2.18e-14	3.31e-13	22.8923	64236	PDLIM2	PDZ and LIM domain 2 [Source:HGNC Symbol;Acc:HGNC:13992]	8	22578279	22598025	1
ENSG00000108679	-4.04058	1.51927	-17.8582	2.7e-14	3.99e-13	22.8728	3959	LGALS3BP	galectin 3 binding protein [Source:HGNC Symbol;Acc:HGNC:6564]	17	78971238	78980109	-1
ENSG00000246763	-2.39792	3.3345	-17.9948	2.32e-14	3.49e-13	22.8722	503569	RGMB-AS1	RGMB antisense RNA 1 [Source:HGNC Symbol;Acc:HGNC:48666]	5	98769618	98773469	-1
ENSG00000135736	-1.49332	3.05932	-18.0015	2.3e-14	3.47e-13	22.8713	92922	CCDC102A	coiled-coil domain containing 102A [Source:HGNC Symbol;Acc:HGNC:28097]	16	57512178	57536599	-1
ENSG00000133985	-2.57688	1.58729	-17.8236	2.81e-14	4.13e-13	22.864	23508	TTC9	tetratricopeptide repeat domain 9 [Source:HGNC Symbol;Acc:HGNC:20267]	14	70641787	70675360	1
ENSG00000235865	1.23438	3.84272	18.1896	1.87e-14	2.88e-13	22.8634	57000	GSN-AS1	GSN antisense RNA 1 [Source:HGNC Symbol;Acc:HGNC:23372]	9	121280768	121285530	-1
ENSG00000110492	-0.793721	8.00094	-18.6414	1.14e-14	1.85e-13	22.8625	4192	MDK	midkine (neurite growth-promoting factor 2) [Source:HGNC Symbol;Acc:HGNC:6972]	11	46380756	46383837	1
ENSG00000198825	0.801485	6.44647	18.5627	1.24e-14	2e-13	22.861	22876	INPP5F	inositol polyphosphate-5-phosphatase F [Source:HGNC Symbol;Acc:HGNC:17054]	10	119726097	119829278	1
ENSG00000283327	-4.22763	0.690647	-17.9827	2.35e-14	3.54e-13	22.8603	102465506	MIR6841	microRNA 6841 [Source:HGNC Symbol;Acc:HGNC:50070]	8	24953796	24953867	-1
ENSG00000136997	-3.42753	2.15649	-17.8127	2.84e-14	4.17e-13	22.848	4609	MYC	v-myc avian myelocytomatosis viral oncogene homolog [Source:HGNC Symbol;Acc:HGNC:7553]	8	127735434	127741434	1
ENSG00000134343	-4.83761	0.985224	-17.9545	2.42e-14	3.64e-13	22.8342	63982	ANO3	anoctamin 3 [Source:HGNC Symbol;Acc:HGNC:14004]	11	26309599	26663288	1
ENSG00000052126	0.856726	6.06922	18.5044	1.32e-14	2.11e-13	22.831	54477	PLEKHA5	pleckstrin homology domain containing A5 [Source:HGNC Symbol;Acc:HGNC:30036]	12	19129752	19376400	1
ENSG00000138119	-6.00046	1.65493	-17.9291	2.49e-14	3.73e-13	22.8249	26509	MYOF	myoferlin [Source:HGNC Symbol;Acc:HGNC:3656]	10	93306429	93482317	-1
ENSG00000136261	0.765553	7.23217	18.5777	1.22e-14	1.97e-13	22.8246	28969	BZW2	basic leucine zipper and W2 domains 2 [Source:HGNC Symbol;Acc:HGNC:18808]	7	16646131	16706523	1
ENSG00000111907	-1.56415	3.30322	-17.9886	2.33e-14	3.52e-13	22.8154	7164	TPD52L1	tumor protein D52-like 1 [Source:HGNC Symbol;Acc:HGNC:12006]	6	125119049	125264407	1
ENSG00000183828	2.26288	1.80268	17.8054	2.86e-14	4.2e-13	22.8034	256281	NUDT14	nudix hydrolase 14 [Source:HGNC Symbol;Acc:HGNC:20141]	14	105172938	105181323	-1
ENSG00000276216	-1.28687	3.62365	-18.0475	2.18e-14	3.31e-13	22.8023		CH17-373J23.1		1	145281116	145281462	1
ENSG00000156011	-0.689264	6.72532	-18.4872	1.35e-14	2.14e-13	22.7647	23362	PSD3	pleckstrin and Sec7 domain containing 3 [Source:HGNC Symbol;Acc:HGNC:19093]	8	18527301	19084730	-1
ENSG00000185614	1.94355	2.72986	17.8887	2.61e-14	3.88e-13	22.7597	389119	FAM212A	family with sequence similarity 212 member A [Source:HGNC Symbol;Acc:HGNC:32480]	3	49803254	49805030	1
ENSG00000106571	0.688834	6.10553	18.4371	1.42e-14	2.25e-13	22.7497	2737	GLI3	GLI family zinc finger 3 [Source:HGNC Symbol;Acc:HGNC:4319]	7	41960950	42237870	-1
ENSG00000105928	1.52053	2.71903	17.8801	2.63e-14	3.91e-13	22.7403	1687	DFNA5	DFNA5, deafness associated tumor suppressor [Source:HGNC Symbol;Acc:HGNC:2810]	7	24698353	24758113	-1
ENSG00000267280	5.71944	-1.59422	18.0628	2.15e-14	3.27e-13	22.7307	103689912	TBX2-AS1	TBX2 antisense RNA 1 [Source:HGNC Symbol;Acc:HGNC:50355]	17	61393456	61411555	-1
ENSG00000179241	0.838471	5.00003	18.2809	1.69e-14	2.62e-13	22.7298	143458	LDLRAD3	low density lipoprotein receptor class A domain containing 3 [Source:HGNC Symbol;Acc:HGNC:27046]	11	35943981	36232136	1
ENSG00000181826	-1.35083	4.75208	-18.1845	1.88e-14	2.9e-13	22.7297	768211	RELL1	RELT like 1 [Source:HGNC Symbol;Acc:HGNC:27379]	4	37590800	37686376	-1
ENSG00000277268	5.02986	-1.72989	18.0977	2.07e-14	3.16e-13	22.7254	102723471	RP11-445F12.1		17	36861674	36936661	-1
ENSG00000104998	-2.78677	2.85361	-17.7653	3e-14	4.37e-13	22.7109	9466	IL27RA	interleukin 27 receptor subunit alpha [Source:HGNC Symbol;Acc:HGNC:17290]	19	14031748	14053216	1
ENSG00000100030	0.595178	8.08147	18.5153	1.31e-14	2.09e-13	22.7091	5594	MAPK1	mitogen-activated protein kinase 1 [Source:HGNC Symbol;Acc:HGNC:6871]	22	21754500	21867680	-1
ENSG00000143324	-0.781762	6.4008	-18.4065	1.47e-14	2.32e-13	22.7031	9213	XPR1	xenotropic and polytropic retrovirus receptor 1 [Source:HGNC Symbol;Acc:HGNC:12827]	1	180632004	180890251	1
ENSG00000251322	-2.08644	2.77186	-17.7821	2.94e-14	4.3e-13	22.7026	85358	SHANK3	SH3 and multiple ankyrin repeat domains 3 [Source:HGNC Symbol;Acc:HGNC:14294]	22	50674415	50733298	1
ENSG00000185112	-4.55538	0.393904	-17.9307	2.49e-14	3.73e-13	22.6841	131583	FAM43A	family with sequence similarity 43 member A [Source:HGNC Symbol;Acc:HGNC:26888]	3	194686544	194689037	1
ENSG00000168280	-0.732781	6.47746	-18.3933	1.49e-14	2.35e-13	22.6798	3800	KIF5C	kinesin family member 5C [Source:HGNC Symbol;Acc:HGNC:6325]	2	148875250	149026759	1
ENSG00000198604	0.815823	7.55097	18.4535	1.4e-14	2.22e-13	22.6663	11177	BAZ1A	bromodomain adjacent to zinc finger domain 1A [Source:HGNC Symbol;Acc:HGNC:960]	14	34752731	34875647	-1
ENSG00000204442	1.7617	2.06185	17.7189	3.16e-14	4.59e-13	22.6651	728215	FAM155A	family with sequence similarity 155 member A [Source:HGNC Symbol;Acc:HGNC:33877]	13	107163510	107866735	-1
ENSG00000091879	-1.93485	2.78198	-17.7575	3.02e-14	4.41e-13	22.6638	285	ANGPT2	angiopoietin 2 [Source:HGNC Symbol;Acc:HGNC:485]	8	6499651	6563409	-1
ENSG00000181800	3.32198	0.714038	17.6568	3.39e-14	4.89e-13	22.6612	414196	CELF2-AS1	CELF2 antisense RNA 1 [Source:HGNC Symbol;Acc:HGNC:23515]	10	11316834	11319884	-1
ENSG00000184905	-6.3874	-1.32889	-18.1145	2.03e-14	3.11e-13	22.6578	140597	TCEAL2	transcription elongation factor A like 2 [Source:HGNC Symbol;Acc:HGNC:29818]	X	102125688	102127711	1
ENSG00000223908	1.28726	3.50699	17.9474	2.44e-14	3.66e-13	22.6573		AC068657.2		5	160023740	160024045	-1
ENSG00000132182	-0.97645	5.74681	-18.2846	1.68e-14	2.62e-13	22.6488	23225	NUP210	nucleoporin 210 [Source:HGNC Symbol;Acc:HGNC:30052]	3	13316235	13420309	-1
ENSG00000100151	-2.03561	2.00373	-17.6514	3.41e-14	4.92e-13	22.6421	9463	PICK1	protein interacting with PRKCA 1 [Source:HGNC Symbol;Acc:HGNC:9394]	22	38056311	38075701	1
ENSG00000185608	1.07919	4.54355	18.119	2.02e-14	3.1e-13	22.6347	64976	MRPL40	mitochondrial ribosomal protein L40 [Source:HGNC Symbol;Acc:HGNC:14491]	22	19431902	19436075	1
ENSG00000125355	-3.10046	1.33653	-17.6122	3.56e-14	5.11e-13	22.6169	55026	TMEM255A	transmembrane protein 255A [Source:HGNC Symbol;Acc:HGNC:26086]	X	120258650	120311556	-1
ENSG00000251396	2.96872	0.513558	17.6127	3.56e-14	5.11e-13	22.6039		LINC01301	long intergenic non-protein coding RNA 1301 [Source:HGNC Symbol;Acc:HGNC:50464]	8	60384588	60516795	-1
ENSG00000110422	0.651044	6.92774	18.3619	1.54e-14	2.42e-13	22.5986	10114	HIPK3	homeodomain interacting protein kinase 3 [Source:HGNC Symbol;Acc:HGNC:4915]	11	33256672	33357023	1
ENSG00000237424	4.18652	-0.144903	17.7374	3.09e-14	4.5e-13	22.5877	84793	FOXD2-AS1	FOXD2 antisense RNA 1 (head to head) [Source:HGNC Symbol;Acc:HGNC:44256]	1	47432133	47434641	-1
ENSG00000106006	-1.24	3.67464	-17.8708	2.66e-14	3.94e-13	22.5858	3203	HOXA6	homeobox A6 [Source:HGNC Symbol;Acc:HGNC:5107]	7	27145396	27150603	-1
ENSG00000108797	-1.04634	4.1716	-17.9486	2.44e-14	3.66e-13	22.5599	8506	CNTNAP1	contactin associated protein 1 [Source:HGNC Symbol;Acc:HGNC:8011]	17	42682613	42699814	1
ENSG00000197653	0.856113	5.27075	18.1696	1.91e-14	2.94e-13	22.5566	196385	DNAH10	dynein axonemal heavy chain 10 [Source:HGNC Symbol;Acc:HGNC:2941]	12	123762188	123936206	1
ENSG00000223519	2.00029	1.85264	17.5982	3.62e-14	5.17e-13	22.5564		KIF28P	kinesin family member 28, pseudogene [Source:HGNC Symbol;Acc:HGNC:49205]	1	246771837	246830059	-1
ENSG00000236651	5.64735	-1.97376	17.9072	2.55e-14	3.81e-13	22.5417	104326193	DLX2-AS1	DLX2 antisense RNA 1 (head to head) [Source:HGNC Symbol;Acc:HGNC:50638]	2	172103006	172109982	1
ENSG00000137501	1.38527	4.8046	18.0646	2.14e-14	3.27e-13	22.5285	54843	SYTL2	synaptotagmin like 2 [Source:HGNC Symbol;Acc:HGNC:15585]	11	85694224	85811159	-1
ENSG00000129474	-1.10623	5.73689	-18.1702	1.91e-14	2.94e-13	22.5251	84962	AJUBA	ajuba LIM protein [Source:HGNC Symbol;Acc:HGNC:20250]	14	22971174	22982642	-1
ENSG00000183722	-1.70097	4.46854	-17.9167	2.53e-14	3.78e-13	22.5036	10186	LHFP	lipoma HMGIC fusion partner [Source:HGNC Symbol;Acc:HGNC:6586]	13	39342892	39603528	-1
ENSG00000182326	-2.11334	2.21579	-17.5438	3.85e-14	5.46e-13	22.501	716	C1S	complement component 1, s subcomponent [Source:HGNC Symbol;Acc:HGNC:1247]	12	6988259	7071032	1
ENSG00000111110	-2.23536	4.12617	-17.8129	2.84e-14	4.17e-13	22.4959	57460	PPM1H	protein phosphatase, Mg2+/Mn2+ dependent 1H [Source:HGNC Symbol;Acc:HGNC:18583]	12	62643982	62935037	-1
ENSG00000117650	-0.835414	4.97604	-18.04	2.2e-14	3.34e-13	22.4905	4751	NEK2	NIMA related kinase 2 [Source:HGNC Symbol;Acc:HGNC:7745]	1	211658657	211675630	-1
ENSG00000124212	-3.56517	1.01022	-17.538	3.87e-14	5.49e-13	22.4887	5740	PTGIS	prostaglandin I2 (prostacyclin) synthase [Source:HGNC Symbol;Acc:HGNC:9603]	20	49503874	49568146	-1
ENSG00000274230	-7.43629	-1.3948	-17.9056	2.56e-14	3.81e-13	22.47		RMST_3	Rhabdomyosarcoma 2 associated transcript conserved region 3 [Source:RFAM;Acc:RF01964]	12	97493178	97493286	1
ENSG00000177674	-1.28934	3.73751	-17.77	2.98e-14	4.35e-13	22.4591	57085	AGTRAP	angiotensin II receptor associated protein [Source:HGNC Symbol;Acc:HGNC:13539]	1	11736084	11754802	1
ENSG00000126822	-0.745011	6.70727	-18.206	1.83e-14	2.84e-13	22.447	26030	PLEKHG3	pleckstrin homology and RhoGEF domain containing G3 [Source:HGNC Symbol;Acc:HGNC:20364]	14	64704102	64750247	1
ENSG00000128581	-0.942853	4.65097	-17.941	2.46e-14	3.69e-13	22.4455	64792	IFT22	intraflagellar transport 22 [Source:HGNC Symbol;Acc:HGNC:21895]	7	101313367	101321823	-1
ENSG00000143845	1.5367	3.03997	17.6744	3.32e-14	4.81e-13	22.4417	55224	ETNK2	ethanolamine kinase 2 [Source:HGNC Symbol;Acc:HGNC:25575]	1	204131062	204152003	-1
ENSG00000243620	-5.76941	-1.98885	-17.9626	2.4e-14	3.61e-13	22.441		RP11-649A16.1		3	146909685	147370656	-1
ENSG00000196781	1.17455	5.21566	18.0567	2.16e-14	3.29e-13	22.4406	7088	TLE1	transducin like enhancer of split 1 [Source:HGNC Symbol;Acc:HGNC:11837]	9	81583683	81689305	-1
ENSG00000164197	1.53835	3.03812	17.6543	3.39e-14	4.9e-13	22.4189	285671	RNF180	ring finger protein 180 [Source:HGNC Symbol;Acc:HGNC:27752]	5	64165844	64372869	1
ENSG00000164142	-3.97373	0.572242	-17.5667	3.75e-14	5.33e-13	22.4141	729830	FAM160A1	family with sequence similarity 160 member A1 [Source:HGNC Symbol;Acc:HGNC:34237]	4	151409216	151663632	1
ENSG00000226887	-2.47407	2.04012	-17.4414	4.33e-14	6.09e-13	22.4111	100288413	ERVMER34-1	endogenous retrovirus group MER34 member 1 [Source:HGNC Symbol;Acc:HGNC:42970]	4	52722618	52751640	-1
ENSG00000164850	2.41666	1.33763	17.4274	4.4e-14	6.18e-13	22.4077	2852	GPER1	G protein-coupled estrogen receptor 1 [Source:HGNC Symbol;Acc:HGNC:4485]	7	1082208	1093815	1
ENSG00000157064	-4.52926	0.27653	-17.6928	3.25e-14	4.72e-13	22.4038	23057	NMNAT2	nicotinamide nucleotide adenylyltransferase 2 [Source:HGNC Symbol;Acc:HGNC:16789]	1	183248237	183418602	-1
ENSG00000108379	-1.71214	3.18244	-17.5879	3.66e-14	5.22e-13	22.3844	7473 101929777	WNT3	Wnt family member 3 [Source:HGNC Symbol;Acc:HGNC:12782]	17	46762506	46833154	-1
ENSG00000108947	-1.83478	3.50182	-17.628	3.5e-14	5.03e-13	22.3773	1949	EFNB3	ephrin B3 [Source:HGNC Symbol;Acc:HGNC:3228]	17	7705202	7711378	1
ENSG00000253552	-1.58002	3.27464	-17.6031	3.6e-14	5.15e-13	22.3759		HOXA-AS2	HOXA cluster antisense RNA 2 [Source:HGNC Symbol;Acc:HGNC:43745]	7	27107777	27134302	1
ENSG00000138722	-2.50075	4.06156	-17.6775	3.31e-14	4.79e-13	22.3743	22915	MMRN1	multimerin 1 [Source:HGNC Symbol;Acc:HGNC:7178]	4	89879532	89954629	1
ENSG00000185252	0.692055	5.59544	18.0492	2.18e-14	3.31e-13	22.3678	7625	ZNF74	zinc finger protein 74 [Source:HGNC Symbol;Acc:HGNC:13144]	22	20394115	20408461	1
ENSG00000112893	-0.841311	6.51722	-18.1069	2.05e-14	3.13e-13	22.3512	4124	MAN2A1	mannosidase alpha class 2A member 1 [Source:HGNC Symbol;Acc:HGNC:6824]	5	109689366	109869625	1
ENSG00000092529	2.84973	1.41238	17.3696	4.7e-14	6.53e-13	22.3424	825	CAPN3	calpain 3 [Source:HGNC Symbol;Acc:HGNC:1480]	15	42359500	42412318	1
ENSG00000107819	2.32832	1.6443	17.3825	4.63e-14	6.45e-13	22.3341	81855	SFXN3	sideroflexin 3 [Source:HGNC Symbol;Acc:HGNC:16087]	10	101031234	101041244	1
ENSG00000070018	-0.600895	7.1102	-18.1325	1.99e-14	3.05e-13	22.3323	4040	LRP6	LDL receptor related protein 6 [Source:HGNC Symbol;Acc:HGNC:6698]	12	12116025	12267012	-1
ENSG00000180979	0.773953	5.55556	18.0126	2.27e-14	3.43e-13	22.3317	255252	LRRC57	leucine rich repeat containing 57 [Source:HGNC Symbol;Acc:HGNC:26719]	15	42537820	42548802	-1
ENSG00000160888	-1.22005	4.81089	-17.8518	2.72e-14	4.01e-13	22.3261	9592	IER2	immediate early response 2 [Source:HGNC Symbol;Acc:HGNC:28871]	19	13150415	13154908	1
ENSG00000177910	5.09475	-2.34613	17.7277	3.12e-14	4.54e-13	22.2934		SPATA31C2	SPATA31 subfamily C member 2 [Source:HGNC Symbol;Acc:HGNC:24508]	9	88129458	88138446	-1
ENSG00000168772	-2.08589	2.79816	-17.4112	4.48e-14	6.28e-13	22.2683	80319	CXXC4	CXXC finger protein 4 [Source:HGNC Symbol;Acc:HGNC:24593]	4	104468312	104494901	-1
ENSG00000246705	-1.26604	3.76026	-17.6028	3.6e-14	5.15e-13	22.2576	55766	H2AFJ	H2A histone family member J [Source:HGNC Symbol;Acc:HGNC:14456]	12	14774383	14778002	1
ENSG00000157837	0.97239	4.96344	17.8569	2.7e-14	3.99e-13	22.2496	121665	SPPL3	signal peptide peptidase like 3 [Source:HGNC Symbol;Acc:HGNC:30424]	12	120762510	120904371	-1
ENSG00000092621	-0.701439	7.78499	-18.0902	2.08e-14	3.18e-13	22.2458	26227	PHGDH	phosphoglycerate dehydrogenase [Source:HGNC Symbol;Acc:HGNC:8923]	1	119659798	119744215	1
ENSG00000108375	-1.76254	3.35487	-17.486	4.11e-14	5.81e-13	22.2344	54894	RNF43	ring finger protein 43 [Source:HGNC Symbol;Acc:HGNC:18505]	17	58352500	58417595	-1
ENSG00000179603	-3.10959	1.45294	-17.2681	5.28e-14	7.24e-13	22.2329	2918	GRM8	glutamate metabotropic receptor 8 [Source:HGNC Symbol;Acc:HGNC:4600]	7	126438598	127253294	-1
ENSG00000198932	-1.25461	3.28593	-17.4933	4.08e-14	5.77e-13	22.2256	9737	GPRASP1	G protein-coupled receptor associated sorting protein 1 [Source:HGNC Symbol;Acc:HGNC:24834]	X	102651366	102659083	1
ENSG00000167779	-3.8949	0.43258	-17.397	4.55e-14	6.36e-13	22.2087	3489	IGFBP6	insulin like growth factor binding protein 6 [Source:HGNC Symbol;Acc:HGNC:5475]	12	53097436	53102345	1
ENSG00000250786	-4.51764	0.209898	-17.5234	3.94e-14	5.58e-13	22.2065		SNHG18	small nucleolar RNA host gene 18 [Source:HGNC Symbol;Acc:HGNC:49007]	5	9546200	9550609	1
ENSG00000138829	-0.74898	7.97356	-18.0477	2.18e-14	3.31e-13	22.1871	2201	FBN2	fibrillin 2 [Source:HGNC Symbol;Acc:HGNC:3604]	5	128257909	128659185	-1
ENSG00000105223	-0.721191	7.23963	-18.0125	2.27e-14	3.43e-13	22.187	23646	PLD3	phospholipase D family member 3 [Source:HGNC Symbol;Acc:HGNC:17158]	19	40348456	40380439	1
ENSG00000151150	0.992461	5.54509	17.8723	2.66e-14	3.94e-13	22.1727	288	ANK3	ankyrin 3, node of Ranvier (ankyrin G) [Source:HGNC Symbol;Acc:HGNC:494]	10	60026298	60733490	-1
ENSG00000008283	-2.23669	2.09137	-17.2451	5.42e-14	7.41e-13	22.1716	1534	CYB561	cytochrome b561 [Source:HGNC Symbol;Acc:HGNC:2571]	17	63432304	63446378	-1
ENSG00000281406	-5.71235	-0.757822	-17.6096	3.57e-14	5.12e-13	22.1643		BLACAT1	bladder cancer associated transcript 1 (non-protein coding) [Source:HGNC Symbol;Acc:HGNC:48597]	1	205434886	205437879	-1
ENSG00000006327	-2.61458	1.96746	-17.2207	5.58e-14	7.59e-13	22.1643	51330	TNFRSF12A	TNF receptor superfamily member 12A [Source:HGNC Symbol;Acc:HGNC:18152]	16	3018445	3022383	1
ENSG00000133863	1.5092	3.9064	17.5873	3.66e-14	5.22e-13	22.1595	56154	TEX15	testis expressed 15 [Source:HGNC Symbol;Acc:HGNC:11738]	8	30831544	30890606	-1
ENSG00000106868	1.11964	3.90324	17.5937	3.64e-14	5.19e-13	22.1587	64420	SUSD1	sushi domain containing 1 [Source:HGNC Symbol;Acc:HGNC:25413]	9	112040785	112175408	-1
ENSG00000117155	-0.771116	5.37895	-17.8174	2.82e-14	4.16e-13	22.1576	117178	SSX2IP	SSX family member 2 interacting protein [Source:HGNC Symbol;Acc:HGNC:16509]	1	84643707	84690803	-1
ENSG00000169258	1.26288	3.73527	17.5566	3.79e-14	5.39e-13	22.1536	114787	GPRIN1	G protein regulated inducer of neurite outgrowth 1 [Source:HGNC Symbol;Acc:HGNC:24835]	5	176595802	176610133	-1
ENSG00000111364	0.798327	5.54644	17.8557	2.71e-14	3.99e-13	22.1512	57696	DDX55	DEAD-box helicase 55 [Source:HGNC Symbol;Acc:HGNC:20085]	12	123602077	123620941	1
ENSG00000249790	-0.860606	5.99167	-17.8757	2.65e-14	3.93e-13	22.1402		RP11-20D14.6		12	8788257	8795789	1
ENSG00000140465	6.60465	-0.178706	17.4217	4.43e-14	6.21e-13	22.1399	1543	CYP1A1	cytochrome P450 family 1 subfamily A member 1 [Source:HGNC Symbol;Acc:HGNC:2595]	15	74719542	74725610	-1
ENSG00000160753	-1.38727	3.5684	-17.4614	4.23e-14	5.96e-13	22.1383	23623	RUSC1	RUN and SH3 domain containing 1 [Source:HGNC Symbol;Acc:HGNC:17153]	1	155320896	155331114	1
ENSG00000178498	-1.67552	3.69821	-17.4661	4.21e-14	5.93e-13	22.1366	196403	DTX3	deltex E3 ubiquitin ligase 3 [Source:HGNC Symbol;Acc:HGNC:24457]	12	57604622	57609804	1
ENSG00000015171	0.70656	6.47206	17.9249	2.5e-14	3.74e-13	22.1285	10771	ZMYND11	zinc finger MYND-type containing 11 [Source:HGNC Symbol;Acc:HGNC:16966]	10	134465	254637	1
ENSG00000128052	4.01534	-0.0548136	17.2822	5.19e-14	7.14e-13	22.1263	3791	KDR	kinase insert domain receptor [Source:HGNC Symbol;Acc:HGNC:6307]	4	55078477	55125589	-1
ENSG00000151468	2.25331	1.738	17.194	5.75e-14	7.8e-13	22.104	83643	CCDC3	coiled-coil domain containing 3 [Source:HGNC Symbol;Acc:HGNC:23813]	10	12896625	13099652	-1
ENSG00000186716	-0.934623	4.73565	-17.6586	3.38e-14	4.89e-13	22.0989	613	BCR	BCR, RhoGEF and GTPase activating protein [Source:HGNC Symbol;Acc:HGNC:1014]	22	23179704	23318037	1
ENSG00000132434	0.773587	5.60347	17.8165	2.83e-14	4.16e-13	22.0971	55915	LANCL2	LanC like 2 [Source:HGNC Symbol;Acc:HGNC:6509]	7	55365448	55433742	1
ENSG00000206532	0.803069	6.84534	17.9161	2.53e-14	3.78e-13	22.091		RP11-553A10.1		3	110888384	110893476	-1
ENSG00000148429	0.635601	6.56481	17.8985	2.58e-14	3.84e-13	22.0903	9712	USP6NL	USP6 N-terminal like [Source:HGNC Symbol;Acc:HGNC:16858]	10	11453946	11611754	-1
ENSG00000171940	-0.779505	5.6319	-17.7921	2.91e-14	4.26e-13	22.0887	7764	ZNF217	zinc finger protein 217 [Source:HGNC Symbol;Acc:HGNC:13009]	20	53567065	53609907	-1
ENSG00000012171	-2.53307	2.15966	-17.1682	5.93e-14	8.02e-13	22.0853	7869 102465526	SEMA3B	semaphorin 3B [Source:HGNC Symbol;Acc:HGNC:10724]	3	50267558	50277546	1
ENSG00000148600	1.43986	3.19248	17.3946	4.56e-14	6.37e-13	22.0806	92211	CDHR1	cadherin related family member 1 [Source:HGNC Symbol;Acc:HGNC:14550]	10	84194635	84219621	1
ENSG00000221988	0.79169	5.80879	17.8252	2.8e-14	4.13e-13	22.0803	9374	PPT2	palmitoyl-protein thioesterase 2 [Source:HGNC Symbol;Acc:HGNC:9326]	6	32153441	32163680	1
ENSG00000159267	0.796583	5.08409	17.7289	3.12e-14	4.54e-13	22.0765	3141	HLCS	holocarboxylase synthetase [Source:HGNC Symbol;Acc:HGNC:4976]	21	36750888	36990236	-1
ENSG00000071127	0.682236	8.18338	17.9648	2.4e-14	3.6e-13	22.0731	9948	WDR1	WD repeat domain 1 [Source:HGNC Symbol;Acc:HGNC:12754]	4	10074339	10116949	-1
ENSG00000162670	-5.79577	-1.81942	-17.5759	3.71e-14	5.28e-13	22.0696	339479	BRINP3	BMP/retinoic acid inducible neural specific 3 [Source:HGNC Symbol;Acc:HGNC:22393]	1	190097662	190478404	-1
ENSG00000174628	-1.62312	3.51388	-17.3705	4.69e-14	6.53e-13	22.0573	124152	IQCK	IQ motif containing K [Source:HGNC Symbol;Acc:HGNC:28556]	16	19716456	19858467	1
ENSG00000266076	-0.808355	5.86358	-17.7748	2.96e-14	4.33e-13	22.0369		CTD-2535L24.2		17	65538102	65641033	-1
ENSG00000102054	0.728756	7.37274	17.8962	2.59e-14	3.85e-13	22.0361	5931	RBBP7	RB binding protein 7, chromatin remodeling factor [Source:HGNC Symbol;Acc:HGNC:9890]	X	16839283	16870414	-1
ENSG00000189129	2.80613	0.816189	17.0959	6.45e-14	8.66e-13	22.0359	219348	PLAC9	placenta specific 9 [Source:HGNC Symbol;Acc:HGNC:19255]	10	80131682	80145359	1
ENSG00000175785	2.96928	0.53555	17.1023	6.4e-14	8.61e-13	22.031	145270	PRIMA1	proline rich membrane anchor 1 [Source:HGNC Symbol;Acc:HGNC:18319]	14	93718298	93788481	-1
ENSG00000121390	0.603927	6.76944	17.8586	2.7e-14	3.99e-13	22.0291	55269	PSPC1	paraspeckle component 1 [Source:HGNC Symbol;Acc:HGNC:20320]	13	19674752	19783019	-1
ENSG00000072135	-1.62483	2.50217	-17.1873	5.8e-14	7.86e-13	22.0264	26469	PTPN18	protein tyrosine phosphatase, non-receptor type 18 [Source:HGNC Symbol;Acc:HGNC:9649]	2	130356007	130375409	1
ENSG00000184304	1.18103	3.94425	17.4595	4.24e-14	5.97e-13	21.9927	5587	PRKD1	protein kinase D1 [Source:HGNC Symbol;Acc:HGNC:9407]	14	29576479	30191898	-1
ENSG00000120820	-1.59115	3.09794	-17.2426	5.44e-14	7.43e-13	21.9864	83468	GLT8D2	glycosyltransferase 8 domain containing 2 [Source:HGNC Symbol;Acc:HGNC:24890]	12	103988984	104064183	-1
ENSG00000108830	-1.34565	4.43085	-17.4876	4.1e-14	5.8e-13	21.9848	8153	RND2	Rho family GTPase 2 [Source:HGNC Symbol;Acc:HGNC:18315]	17	43025241	43032036	1
ENSG00000102195	-6.54286	-1.55972	-17.4524	4.27e-14	6.01e-13	21.9824	9248	GPR50	G protein-coupled receptor 50 [Source:HGNC Symbol;Acc:HGNC:4506]	X	151176653	151181465	1
ENSG00000138411	1.22036	3.43912	17.3565	4.77e-14	6.62e-13	21.9794	57520	HECW2	HECT, C2 and WW domain containing E3 ubiquitin protein ligase 2 [Source:HGNC Symbol;Acc:HGNC:29853]	2	196194370	196593692	-1
ENSG00000102934	0.724669	6.46671	17.796	2.89e-14	4.24e-13	21.9787	51090	PLLP	plasmolipin [Source:HGNC Symbol;Acc:HGNC:18553]	16	57248547	57284687	-1
ENSG00000163623	-4.88726	-0.164167	-17.3986	4.54e-14	6.35e-13	21.9563	4825	NKX6-1	NK6 homeobox 1 [Source:HGNC Symbol;Acc:HGNC:7839]	4	84491987	84498450	-1
ENSG00000131697	-1.37268	3.61523	-17.3123	5.02e-14	6.91e-13	21.9515	261734	NPHP4	nephrocystin 4 [Source:HGNC Symbol;Acc:HGNC:19104]	1	5862811	5992473	-1
ENSG00000121236	1.00384	4.89418	17.5865	3.67e-14	5.22e-13	21.9459	117854	TRIM6	tripartite motif containing 6 [Source:HGNC Symbol;Acc:HGNC:16277]	11	5596109	5612958	1
ENSG00000067113	0.831373	5.20188	17.6289	3.49e-14	5.03e-13	21.9393	8611	PLPP1	phospholipid phosphatase 1 [Source:HGNC Symbol;Acc:HGNC:9228]	5	55424854	55535050	-1
ENSG00000109452	1.10147	6.52824	17.7492	3.05e-14	4.45e-13	21.9211	8821	INPP4B	inositol polyphosphate-4-phosphatase type II B [Source:HGNC Symbol;Acc:HGNC:6075]	4	142023160	142847432	-1
ENSG00000137959	-7.22947	-0.396049	-17.3309	4.91e-14	6.79e-13	21.9099	10964	IFI44L	interferon induced protein 44 like [Source:HGNC Symbol;Acc:HGNC:17817]	1	78619922	78646145	1
ENSG00000134769	-3.4897	2.44774	-17.0089	7.14e-14	9.49e-13	21.9079	1837	DTNA	dystrobrevin alpha [Source:HGNC Symbol;Acc:HGNC:3057]	18	34493290	34891844	1
ENSG00000224577	-5.83725	-1.15973	-17.3758	4.66e-14	6.49e-13	21.9076	102724224	LINC01117	long intergenic non-protein coding RNA 1117 [Source:HGNC Symbol;Acc:HGNC:49260]	2	176637710	176655958	1
ENSG00000283382	-4.17093	1.4368	-17.0052	7.17e-14	9.52e-13	21.9071	11245	AC023908.1		15	39801132	39829117	-1
ENSG00000143499	0.829803	6.21664	17.7105	3.19e-14	4.63e-13	21.9013	56950	SMYD2	SET and MYND domain containing 2 [Source:HGNC Symbol;Acc:HGNC:20982]	1	214281102	214337131	1
ENSG00000135824	-6.47047	-0.640608	-17.3369	4.88e-14	6.75e-13	21.9006	85397	RGS8	regulator of G-protein signaling 8 [Source:HGNC Symbol;Acc:HGNC:16810]	1	182641816	182684576	-1
ENSG00000068137	-1.65775	3.5388	-17.239	5.46e-14	7.46e-13	21.8993	79990	PLEKHH3	pleckstrin homology, MyTH4 and FERM domain containing H3 [Source:HGNC Symbol;Acc:HGNC:26105]	17	42667914	42676994	-1
ENSG00000041982	-6.28352	2.0055	-17.0334	6.93e-14	9.25e-13	21.8874	3371	TNC	tenascin C [Source:HGNC Symbol;Acc:HGNC:5318]	9	115019578	115118257	-1
ENSG00000262655	-2.46946	3.29628	-17.1201	6.27e-14	8.45e-13	21.862	10418	SPON1	spondin 1 [Source:HGNC Symbol;Acc:HGNC:11252]	11	13962689	14267884	1
ENSG00000145358	-4.26456	-0.833813	-17.3466	4.82e-14	6.69e-13	21.8551	115265	DDIT4L	DNA damage inducible transcript 4 like [Source:HGNC Symbol;Acc:HGNC:30555]	4	100185870	100190782	-1
ENSG00000154760	-1.8887	2.38238	-17.0044	7.17e-14	9.53e-13	21.8394	146857	SLFN13	schlafen family member 13 [Source:HGNC Symbol;Acc:HGNC:26481]	17	35435096	35448837	-1
ENSG00000063180	-3.30702	2.6943	-16.9751	7.42e-14	9.83e-13	21.8367	770	CA11	carbonic anhydrase 11 [Source:HGNC Symbol;Acc:HGNC:1370]	19	48637942	48646312	-1
ENSG00000165359	0.750321	6.16995	17.6506	3.41e-14	4.92e-13	21.8349	203522	INTS6L	integrator complex subunit 6 like [Source:HGNC Symbol;Acc:HGNC:27334]	X	135520659	135582510	1
ENSG00000198860	0.785141	5.61621	17.5937	3.64e-14	5.19e-13	21.8338	116461	TSEN15	tRNA splicing endonuclease subunit 15 [Source:HGNC Symbol;Acc:HGNC:16791]	1	184051677	184074212	1
ENSG00000160606	-1.60326	2.55895	-17.0307	6.96e-14	9.28e-13	21.8301	116238	TLCD1	TLC domain containing 1 [Source:HGNC Symbol;Acc:HGNC:25177]	17	28724348	28727935	-1
ENSG00000175198	-1.14843	4.6821	-17.3901	4.59e-14	6.4e-13	21.8044	5095	PCCA	propionyl-CoA carboxylase alpha subunit [Source:HGNC Symbol;Acc:HGNC:8653]	13	100089015	100530437	1
ENSG00000187595	-2.18099	2.45763	-16.964	7.52e-14	9.95e-13	21.7951	201181	ZNF385C	zinc finger protein 385C [Source:HGNC Symbol;Acc:HGNC:33722]	17	42025576	42098479	-1
ENSG00000106003	-3.00826	1.49568	-16.8849	8.25e-14	1.08e-12	21.7916	3955	LFNG	LFNG O-fucosylpeptide 3-beta-N-acetylglucosaminyltransferase [Source:HGNC Symbol;Acc:HGNC:6560]	7	2512529	2529177	1
ENSG00000145506	-5.21852	-0.230531	-17.2367	5.48e-14	7.47e-13	21.7907	85409	NKD2	naked cuticle homolog 2 [Source:HGNC Symbol;Acc:HGNC:17046]	5	1008829	1038943	1
ENSG00000008513	-1.23197	3.87958	-17.2247	5.55e-14	7.56e-13	21.7824	6482	ST3GAL1	ST3 beta-galactoside alpha-2,3-sialyltransferase 1 [Source:HGNC Symbol;Acc:HGNC:10862]	8	133454848	133571940	-1
ENSG00000109113	-0.68895	6.61249	-17.6278	3.5e-14	5.03e-13	21.7812	83871 100861437	RAB34	RAB34, member RAS oncogene family [Source:HGNC Symbol;Acc:HGNC:16519]	17	28714281	28718429	-1
ENSG00000038382	-0.713617	7.3652	-17.6579	3.38e-14	4.89e-13	21.7653	7204	TRIO	trio Rho guanine nucleotide exchange factor [Source:HGNC Symbol;Acc:HGNC:12303]	5	14143702	14532128	1
ENSG00000237596	6.03708	-0.700883	17.0832	6.54e-14	8.78e-13	21.7578		RP13-143G15.4		6	135991936	136225751	-1
ENSG00000181026	1.06937	6.96973	17.6334	3.48e-14	5.01e-13	21.7519	64782	AEN	apoptosis enhancing nuclease [Source:HGNC Symbol;Acc:HGNC:25722]	15	88621296	88632282	1
ENSG00000214435	-0.954292	4.72222	-17.3584	4.76e-14	6.61e-13	21.7473	57412	AS3MT	arsenite methyltransferase [Source:HGNC Symbol;Acc:HGNC:17452]	10	102869516	102901899	1
ENSG00000118707	0.632071	6.34727	17.5831	3.68e-14	5.24e-13	21.7383	60436	TGIF2	TGFB induced factor homeobox 2 [Source:HGNC Symbol;Acc:HGNC:15764]	20	36573488	36593950	1
ENSG00000196586	1.20615	4.46232	17.3188	4.98e-14	6.86e-13	21.7168	4646	MYO6	myosin VI [Source:HGNC Symbol;Acc:HGNC:7605]	6	75749192	75919537	1
ENSG00000169499	1.97117	2.39421	16.9473	7.67e-14	1.01e-12	21.7142	59339	PLEKHA2	pleckstrin homology domain containing A2 [Source:HGNC Symbol;Acc:HGNC:14336]	8	38901235	38973909	1
ENSG00000196338	0.795794	4.97185	17.4047	4.51e-14	6.31e-13	21.7135	54413	NLGN3	neuroligin 3 [Source:HGNC Symbol;Acc:HGNC:14289]	X	71144831	71171201	1
ENSG00000111057	-7.51784	0.998356	-17.1239	6.24e-14	8.42e-13	21.7128	3875	KRT18	keratin 18 [Source:HGNC Symbol;Acc:HGNC:6430]	12	52948871	52952901	1
ENSG00000168505	-5.7867	-1.64932	-17.2116	5.64e-14	7.66e-13	21.7075	2637	GBX2	gastrulation brain homeobox 2 [Source:HGNC Symbol;Acc:HGNC:4186]	2	236165236	236168369	-1
ENSG00000170421	-5.32267	1.00849	-16.9501	7.65e-14	1.01e-12	21.7025	3856	KRT8	keratin 8 [Source:HGNC Symbol;Acc:HGNC:6446]	12	52897187	52949954	-1
ENSG00000168906	0.70634	7.86511	17.6335	3.48e-14	5.01e-13	21.7016	4144	MAT2A	methionine adenosyltransferase 2A [Source:HGNC Symbol;Acc:HGNC:6904]	2	85539165	85545280	1
ENSG00000198792	1.0355	5.34712	17.4236	4.42e-14	6.2e-13	21.6751	25829	TMEM184B	transmembrane protein 184B [Source:HGNC Symbol;Acc:HGNC:1310]	22	38219291	38273034	-1
ENSG00000227751	0.821121	5.78011	17.4679	4.2e-14	5.93e-13	21.6634		RP1-20B21.4		1	17406760	17407382	1
ENSG00000102575	3.88088	-0.39932	16.8958	8.15e-14	1.07e-12	21.6354	54	ACP5	acid phosphatase 5, tartrate resistant [Source:HGNC Symbol;Acc:HGNC:124]	19	11574660	11579008	-1
ENSG00000051128	0.896154	4.92104	17.3229	4.96e-14	6.84e-13	21.6265	9454	HOMER3	homer scaffolding protein 3 [Source:HGNC Symbol;Acc:HGNC:17514]	19	18929201	18941261	-1
ENSG00000152495	-1.35737	3.28408	-16.9841	7.35e-14	9.74e-13	21.6255	814	CAMK4	calcium/calmodulin dependent protein kinase IV [Source:HGNC Symbol;Acc:HGNC:1464]	5	111223653	111494886	1
ENSG00000258461	2.13071	1.86525	16.8009	9.11e-14	1.19e-12	21.6204		RP11-164J13.1		15	42348103	42412317	1
ENSG00000169241	-0.964627	4.28845	-17.1719	5.9e-14	7.99e-13	21.6154	55974	SLC50A1	solute carrier family 50 member 1 [Source:HGNC Symbol;Acc:HGNC:30657]	1	155135344	155138857	1
ENSG00000100934	-0.723105	7.63973	-17.5421	3.86e-14	5.47e-13	21.6129	10484	SEC23A	Sec23 homolog A, coat complex II component [Source:HGNC Symbol;Acc:HGNC:10701]	14	39031919	39109646	-1
ENSG00000161835	1.38143	3.43077	17.0442	6.85e-14	9.16e-13	21.6109	160622	GRASP	general receptor for phosphoinositides 1 associated scaffold protein [Source:HGNC Symbol;Acc:HGNC:18707]	12	52006940	52015889	1
ENSG00000213977	1.06741	5.70517	17.4102	4.48e-14	6.28e-13	21.6075	30851	TAX1BP3	Tax1 binding protein 3 [Source:HGNC Symbol;Acc:HGNC:30684]	17	3662896	3668682	-1
ENSG00000144339	-5.51731	0.602268	-16.9751	7.42e-14	9.83e-13	21.6034	23671	TMEFF2	transmembrane protein with EGF like and two follistatin like domains 2 [Source:HGNC Symbol;Acc:HGNC:11867]	2	191949043	192195709	-1
ENSG00000197705	-5.33081	-1.90211	-17.1425	6.11e-14	8.25e-13	21.6012	57565	KLHL14	kelch like family member 14 [Source:HGNC Symbol;Acc:HGNC:29266]	18	32672671	32773062	-1
ENSG00000086289	-1.20641	4.24626	-17.1331	6.17e-14	8.33e-13	21.5922	54749	EPDR1	ependymin related 1 [Source:HGNC Symbol;Acc:HGNC:17572]	7	37683843	37951941	1
ENSG00000030582	-0.918353	5.46629	-17.3391	4.87e-14	6.74e-13	21.585	2896	GRN	granulin [Source:HGNC Symbol;Acc:HGNC:4601]	17	44345086	44353102	1
ENSG00000184305	2.64782	1.09711	16.7071	1.02e-13	1.31e-12	21.5784	401145	CCSER1	coiled-coil serine rich protein 1 [Source:HGNC Symbol;Acc:HGNC:29349]	4	90127535	91601913	1
ENSG00000169836	-4.44827	0.038425	-16.9162	7.96e-14	1.05e-12	21.5185	6870	TACR3	tachykinin receptor 3 [Source:HGNC Symbol;Acc:HGNC:11528]	4	103586031	103719816	-1
ENSG00000170340	-0.790065	5.88345	-17.3268	4.93e-14	6.82e-13	21.5034	10678	B3GNT2	UDP-GlcNAc:betaGal beta-1,3-N-acetylglucosaminyltransferase 2 [Source:HGNC Symbol;Acc:HGNC:15629]	2	62196113	62224731	1
ENSG00000174032	0.866384	4.62889	17.1703	5.91e-14	8e-13	21.4994	253512	SLC25A30	solute carrier family 25 member 30 [Source:HGNC Symbol;Acc:HGNC:27371]	13	45393316	45418455	-1
ENSG00000117385	-0.672894	6.56751	-17.3828	4.63e-14	6.45e-13	21.4938	64175	P3H1	prolyl 3-hydroxylase 1 [Source:HGNC Symbol;Acc:HGNC:19316]	1	42746335	42767084	-1
ENSG00000120549	1.33995	3.12583	16.8927	8.18e-14	1.07e-12	21.4911	56243	KIAA1217	KIAA1217 [Source:HGNC Symbol;Acc:HGNC:25428]	10	23694746	24547848	1
ENSG00000074047	-5.56827	1.28771	-16.7325	9.88e-14	1.28e-12	21.4889	2736	GLI2	GLI family zinc finger 2 [Source:HGNC Symbol;Acc:HGNC:4318]	2	120735623	120992653	1
ENSG00000149257	-1.19517	7.93849	-17.4315	4.38e-14	6.15e-13	21.4693	871	SERPINH1	serpin family H member 1 [Source:HGNC Symbol;Acc:HGNC:1546]	11	75562056	75572783	1
ENSG00000188483	-2.7157	3.34696	-16.7813	9.33e-14	1.21e-12	21.4654	389792	IER5L	immediate early response 5 like [Source:HGNC Symbol;Acc:HGNC:23679]	9	129175552	129178262	-1
ENSG00000133083	-3.56851	1.11314	-16.6243	1.12e-13	1.44e-12	21.4626	9201	DCLK1	doublecortin like kinase 1 [Source:HGNC Symbol;Acc:HGNC:2700]	13	35768652	36131306	-1
ENSG00000168575	-0.740001	5.77479	-17.2714	5.26e-14	7.22e-13	21.45	6575	SLC20A2	solute carrier family 20 member 2 [Source:HGNC Symbol;Acc:HGNC:10947]	8	42416475	42541926	-1
ENSG00000184903	1.57129	2.26266	16.6875	1.04e-13	1.34e-12	21.4122	83943	IMMP2L	inner mitochondrial membrane peptidase subunit 2 [Source:HGNC Symbol;Acc:HGNC:14598]	7	110663051	111562517	-1
ENSG00000154556	-0.965646	4.89173	-17.1053	6.38e-14	8.58e-13	21.4102	8470	SORBS2	sorbin and SH3 domain containing 2 [Source:HGNC Symbol;Acc:HGNC:24098]	4	185585444	185956652	-1
ENSG00000079308	-2.48487	3.61366	-16.7945	9.18e-14	1.2e-12	21.4102	7145	TNS1	tensin 1 [Source:HGNC Symbol;Acc:HGNC:11973]	2	217799789	218002995	-1
ENSG00000148411	1.45763	3.42922	16.875	8.35e-14	1.09e-12	21.4083	138151	NACC2	NACC family member 2 [Source:HGNC Symbol;Acc:HGNC:23846]	9	136006537	136095285	-1
ENSG00000087302	0.603136	7.26028	17.3515	4.8e-14	6.65e-13	21.3998	51637	C14orf166	chromosome 14 open reading frame 166 [Source:HGNC Symbol;Acc:HGNC:23169]	14	51989475	52010691	1
ENSG00000179029	-1.07441	4.86112	-17.0798	6.57e-14	8.81e-13	21.3916	84314	TMEM107	transmembrane protein 107 [Source:HGNC Symbol;Acc:HGNC:28128]	17	8173237	8176399	-1
ENSG00000183798	-2.67783	2.27934	-16.5882	1.17e-13	1.5e-12	21.3888	90187	EMILIN3	elastin microfibril interfacer 3 [Source:HGNC Symbol;Acc:HGNC:16123]	20	41359966	41366827	-1
ENSG00000055118	-3.05363	1.80807	-16.5473	1.23e-13	1.57e-12	21.3862	3757	KCNH2	potassium voltage-gated channel subfamily H member 2 [Source:HGNC Symbol;Acc:HGNC:6251]	7	150944961	150978315	-1
ENSG00000170004	-0.747271	7.13594	-17.3194	4.98e-14	6.86e-13	21.3774	1107	CHD3	chromodomain helicase DNA binding protein 3 [Source:HGNC Symbol;Acc:HGNC:1918]	17	7884806	7912760	1
ENSG00000149798	-2.02486	2.28431	-16.6014	1.16e-13	1.48e-12	21.3743	10435	CDC42EP2	CDC42 effector protein 2 [Source:HGNC Symbol;Acc:HGNC:16263]	11	65314818	65322429	1
ENSG00000144785	0.57909	6.49215	17.2843	5.18e-14	7.13e-13	21.3701		RP11-977G19.10		12	56285916	56316059	-1
ENSG00000172572	-2.61481	1.30486	-16.5259	1.26e-13	1.6e-12	21.3679	5139	PDE3A	phosphodiesterase 3A [Source:HGNC Symbol;Acc:HGNC:8778]	12	20369245	20684381	1
ENSG00000204869	2.30431	1.64537	16.5648	1.21e-13	1.54e-12	21.3646	444882	IGFL4	IGF like family member 4 [Source:HGNC Symbol;Acc:HGNC:32931]	19	46039748	46077118	-1
ENSG00000148926	-2.8074	2.89909	-16.6295	1.12e-13	1.43e-12	21.3638	133	ADM	adrenomedullin [Source:HGNC Symbol;Acc:HGNC:259]	11	10304680	10307397	1
ENSG00000115183	0.764668	5.97075	17.228	5.53e-14	7.53e-13	21.353	85461	TANC1	tetratricopeptide repeat, ankyrin repeat and coiled-coil containing 1 [Source:HGNC Symbol;Acc:HGNC:29364]	2	158968634	159232659	1
ENSG00000143190	-0.587557	7.14275	-17.2919	5.14e-14	7.07e-13	21.3423	5451	POU2F1	POU class 2 homeobox 1 [Source:HGNC Symbol;Acc:HGNC:9212]	1	167220829	167427345	1
ENSG00000161526	0.673343	5.76911	17.1963	5.74e-14	7.79e-13	21.3388	29115	SAP30BP	SAP30 binding protein [Source:HGNC Symbol;Acc:HGNC:30785]	17	75667116	75708062	1
ENSG00000162368	0.749457	6.32266	17.2456	5.42e-14	7.41e-13	21.3384	51727	CMPK1	cytidine/uridine monophosphate kinase 1 [Source:HGNC Symbol;Acc:HGNC:18170]	1	47333797	47378839	1
ENSG00000111218	-7.21083	-1.19593	-16.8091	9.03e-14	1.18e-12	21.3347	56341	PRMT8	protein arginine methyltransferase 8 [Source:HGNC Symbol;Acc:HGNC:5188]	12	3381349	3593973	1
ENSG00000104320	0.765708	6.37769	17.2461	5.42e-14	7.41e-13	21.3343	4683	NBN	nibrin [Source:HGNC Symbol;Acc:HGNC:7652]	8	89933336	90003228	-1
ENSG00000222047	-3.97726	1.65585	-16.4861	1.33e-13	1.67e-12	21.3181	414236	C10orf55	chromosome 10 open reading frame 55 [Source:HGNC Symbol;Acc:HGNC:31008]	10	73909969	73922777	-1
ENSG00000152409	1.53019	2.65526	16.6678	1.07e-13	1.37e-12	21.3163	133746	JMY	junction mediating and regulatory protein, p53 cofactor [Source:HGNC Symbol;Acc:HGNC:28916]	5	79236189	79327215	1
ENSG00000158373	-0.731518	8.61626	-17.3319	4.91e-14	6.79e-13	21.3126	3017	HIST1H2BD	histone cluster 1, H2bd [Source:HGNC Symbol;Acc:HGNC:4747]	6	26158146	26171349	1
ENSG00000144677	-0.679011	7.04428	-17.2493	5.4e-14	7.39e-13	21.2983	10217	CTDSPL	CTD small phosphatase like [Source:HGNC Symbol;Acc:HGNC:16890]	3	37861960	37984469	1
ENSG00000162813	0.892711	4.76936	17.0173	7.07e-14	9.4e-13	21.2871	10380	BPNT1	3'(2'), 5'-bisphosphate nucleotidase 1 [Source:HGNC Symbol;Acc:HGNC:1096]	1	220057482	220090462	-1
ENSG00000164466	0.626186	7.40054	17.2582	5.34e-14	7.32e-13	21.2799	94081	SFXN1	sideroflexin 1 [Source:HGNC Symbol;Acc:HGNC:16085]	5	175477062	175529742	1
ENSG00000130720	-5.98404	-1.07668	-16.7731	9.42e-14	1.22e-12	21.2792	84929	FIBCD1	fibrinogen C domain containing 1 [Source:HGNC Symbol;Acc:HGNC:25922]	9	130902438	130939286	-1
ENSG00000070961	-0.68811	7.22326	-17.2339	5.49e-14	7.49e-13	21.2686	490	ATP2B1	ATPase plasma membrane Ca2+ transporting 1 [Source:HGNC Symbol;Acc:HGNC:814]	12	89588049	89709300	-1
ENSG00000050555	-6.68252	0.186942	-16.7124	1.01e-13	1.31e-12	21.2569	10319	LAMC3	laminin subunit gamma 3 [Source:HGNC Symbol;Acc:HGNC:6494]	9	131009082	131094473	1
ENSG00000100968	-1.57184	4.85131	-16.9393	7.74e-14	1.02e-12	21.2551	4776	NFATC4	nuclear factor of activated T-cells 4 [Source:HGNC Symbol;Acc:HGNC:7778]	14	24365673	24379604	1
ENSG00000082196	1.88066	1.76612	16.4696	1.35e-13	1.7e-12	21.2263	114899	C1QTNF3	C1q and tumor necrosis factor related protein 3 [Source:HGNC Symbol;Acc:HGNC:14326]	5	34019448	34043832	-1
ENSG00000101638	1.78642	3.18194	16.6725	1.06e-13	1.36e-12	21.2229	29906	ST8SIA5	ST8 alpha-N-acetyl-neuraminide alpha-2,8-sialyltransferase 5 [Source:HGNC Symbol;Acc:HGNC:17827]	18	46667821	46759257	-1
ENSG00000100321	-0.987129	4.61775	-16.8966	8.14e-14	1.07e-12	21.2137	9145	SYNGR1	synaptogyrin 1 [Source:HGNC Symbol;Acc:HGNC:11498]	22	39349925	39385588	1
ENSG00000110660	1.2038	5.56518	17.0633	6.7e-14	8.97e-13	21.2125	54733	SLC35F2	solute carrier family 35 member F2 [Source:HGNC Symbol;Acc:HGNC:23615]	11	107790991	107928293	-1
ENSG00000128805	3.47539	0.143742	16.4223	1.43e-13	1.79e-12	21.2019	58504	ARHGAP22	Rho GTPase activating protein 22 [Source:HGNC Symbol;Acc:HGNC:30320]	10	48446034	48656265	-1
ENSG00000101871	0.925444	5.43319	17.0412	6.87e-14	9.19e-13	21.2005	4281	MID1	midline 1 [Source:HGNC Symbol;Acc:HGNC:7095]	X	10445310	10833654	-1
ENSG00000156709	0.65341	5.75572	17.0777	6.59e-14	8.83e-13	21.197	9131	AIFM1	apoptosis inducing factor, mitochondria associated 1 [Source:HGNC Symbol;Acc:HGNC:8768]	X	130129362	130165887	-1
ENSG00000213943	-5.8796	-1.60675	-16.7213	1e-13	1.3e-12	21.1941		KRT18P17	keratin 18 pseudogene 17 [Source:HGNC Symbol;Acc:HGNC:33385]	3	12787393	12788671	-1
ENSG00000202515	-1.96619	1.9793	-16.4239	1.43e-13	1.79e-12	21.1928	56662	VTRNA1-3	vault RNA 1-3 [Source:HGNC Symbol;Acc:HGNC:12656]	5	140726158	140726246	1
ENSG00000149212	0.89521	7.83689	17.2008	5.71e-14	7.75e-13	21.1864	143686	SESN3	sestrin 3 [Source:HGNC Symbol;Acc:HGNC:23060]	11	95165513	95232541	-1
ENSG00000213390	0.61982	7.01984	17.1552	6.02e-14	8.13e-13	21.178	84986	ARHGAP19	Rho GTPase activating protein 19 [Source:HGNC Symbol;Acc:HGNC:23724]	10	97222173	97292673	-1
ENSG00000005513	-1.24602	4.75274	-16.8726	8.37e-14	1.1e-12	21.1723	30812	SOX8	SRY-box 8 [Source:HGNC Symbol;Acc:HGNC:11203]	16	981808	986979	1
ENSG00000176845	-2.4495	1.91296	-16.3874	1.49e-13	1.86e-12	21.1715	284207	METRNL	meteorin like, glial cell differentiation regulator [Source:HGNC Symbol;Acc:HGNC:27584]	17	83079691	83095119	1
ENSG00000050405	0.791411	6.48231	17.1137	6.31e-14	8.5e-13	21.1658	51474	LIMA1	LIM domain and actin binding 1 [Source:HGNC Symbol;Acc:HGNC:24636]	12	50175788	50283546	-1
ENSG00000152092	-3.75858	3.25813	-16.4516	1.38e-13	1.73e-12	21.1575	460	ASTN1	astrotactin 1 [Source:HGNC Symbol;Acc:HGNC:773]	1	176857302	177164973	-1
ENSG00000275231	-7.34089	-0.804674	-16.6292	1.12e-13	1.43e-12	21.1525		RMST_4	Rhabdomyosarcoma 2 associated transcript conserved region 4 [Source:RFAM;Acc:RF01965]	12	97493897	97494003	1
ENSG00000248690	-2.36178	1.97072	-16.368	1.53e-13	1.89e-12	21.1397		HAS2-AS1	HAS2 antisense RNA 1 [Source:HGNC Symbol;Acc:HGNC:34340]	8	121639293	121644693	1
ENSG00000111783	-3.56124	2.09648	-16.3423	1.58e-13	1.95e-12	21.1353	5992	RFX4	regulatory factor X4 [Source:HGNC Symbol;Acc:HGNC:9985]	12	106582907	106762803	1
ENSG00000185652	-6.07461	-1.10154	-16.6349	1.11e-13	1.42e-12	21.1304	4908	NTF3	neurotrophin 3 [Source:HGNC Symbol;Acc:HGNC:8023]	12	5432112	5521536	1
ENSG00000131378	-2.13376	2.57627	-16.4272	1.42e-13	1.78e-12	21.1248	23180	RFTN1	raftlin, lipid raft linker 1 [Source:HGNC Symbol;Acc:HGNC:30278]	3	16313574	16514026	-1
ENSG00000006432	-1.50265	3.41789	-16.5873	1.17e-13	1.5e-12	21.1238	4293	MAP3K9	mitogen-activated protein kinase kinase kinase 9 [Source:HGNC Symbol;Acc:HGNC:6861]	14	70722526	70809534	-1
ENSG00000142494	1.47992	3.45269	16.644	1.1e-13	1.41e-12	21.1212	55244	SLC47A1	solute carrier family 47 member 1 [Source:HGNC Symbol;Acc:HGNC:25588]	17	19495385	19579034	1
ENSG00000102879	-1.44744	3.36525	-16.5783	1.19e-13	1.51e-12	21.1203	11151	CORO1A	coronin 1A [Source:HGNC Symbol;Acc:HGNC:2252]	16	30182827	30189076	1
ENSG00000008086	-1.221	4.03546	-16.7022	1.02e-13	1.32e-12	21.1142	6792	CDKL5	cyclin dependent kinase like 5 [Source:HGNC Symbol;Acc:HGNC:11411]	X	18425583	18653629	1
ENSG00000086300	-1.56046	3.13344	-16.5272	1.26e-13	1.6e-12	21.1113	29887	SNX10	sorting nexin 10 [Source:HGNC Symbol;Acc:HGNC:14974]	7	26291895	26374329	1
ENSG00000163053	-4.21391	0.959052	-16.3595	1.55e-13	1.91e-12	21.1095	151473	SLC16A14	solute carrier family 16 member 14 [Source:HGNC Symbol;Acc:HGNC:26417]	2	230034974	230068999	-1
ENSG00000107731	-3.22642	0.852728	-16.3225	1.62e-13	1.98e-12	21.0995	219699	UNC5B	unc-5 netrin receptor B [Source:HGNC Symbol;Acc:HGNC:12568]	10	71212570	71302864	1
ENSG00000164105	1.02108	4.33048	16.7886	9.25e-14	1.2e-12	21.099	8819	SAP30	Sin3A associated protein 30 [Source:HGNC Symbol;Acc:HGNC:10532]	4	173369969	173377532	1
ENSG00000219451	0.551812	6.97881	17.0863	6.52e-14	8.76e-13	21.0972		AC005251.3		7	20827326	20827753	1
ENSG00000256164	-1.24911	4.83324	-16.8175	8.94e-14	1.17e-12	21.0883	103752584	CCND2-AS1	CCND2 antisense RNA 1 [Source:HGNC Symbol;Acc:HGNC:49398]	12	4248765	4276184	-1
ENSG00000175832	-1.90817	5.62707	-16.8974	8.13e-14	1.07e-12	21.0821	2118	ETV4	ETS variant 4 [Source:HGNC Symbol;Acc:HGNC:3493]	17	43527844	43579620	-1
ENSG00000163661	-1.72565	2.61882	-16.4106	1.45e-13	1.81e-12	21.0744	5806	PTX3	pentraxin 3 [Source:HGNC Symbol;Acc:HGNC:9692]	3	157436789	157443628	1
ENSG00000141540	-1.44981	3.19596	-16.5085	1.29e-13	1.63e-12	21.0688	94015	TTYH2	tweety family member 2 [Source:HGNC Symbol;Acc:HGNC:13877]	17	74213514	74262020	1
ENSG00000006210	-3.06351	1.39343	-16.2725	1.72e-13	2.08e-12	21.0641	6376	CX3CL1	C-X3-C motif chemokine ligand 1 [Source:HGNC Symbol;Acc:HGNC:10647]	16	57372458	57385048	1
ENSG00000088367	-1.3151	3.58476	-16.5743	1.19e-13	1.52e-12	21.0602	2036	EPB41L1	erythrocyte membrane protein band 4.1 like 1 [Source:HGNC Symbol;Acc:HGNC:3378]	20	36091504	36232799	1
ENSG00000261189	-4.91026	-0.253927	-16.5594	1.21e-13	1.54e-12	21.0601		RP3-512B11.3		6	7540451	7541338	-1
ENSG00000137312	-0.633949	6.11392	-16.9839	7.35e-14	9.74e-13	21.0563	10211	FLOT1	flotillin 1 [Source:HGNC Symbol;Acc:HGNC:3757]	6	30727709	30742733	-1
ENSG00000170921	0.698966	5.85712	16.9655	7.51e-14	9.94e-13	21.0481	26115	TANC2	tetratricopeptide repeat, ankyrin repeat and coiled-coil containing 2 [Source:HGNC Symbol;Acc:HGNC:30212]	17	63009556	63427699	1
ENSG00000163946	-0.671367	6.81178	-17.028	6.98e-14	9.3e-13	21.0468	23272	FAM208A	family with sequence similarity 208 member A [Source:HGNC Symbol;Acc:HGNC:30314]	3	56620133	56683237	-1
ENSG00000166292	-3.80912	0.438401	-16.3473	1.57e-13	1.94e-12	21.0438	55273	TMEM100	transmembrane protein 100 [Source:HGNC Symbol;Acc:HGNC:25607]	17	55719627	55732121	-1
ENSG00000100441	0.564788	6.61864	17.0215	7.03e-14	9.36e-13	21.0427	23351	KHNYN	KH and NYN domain containing [Source:HGNC Symbol;Acc:HGNC:20166]	14	24429286	24441834	1
ENSG00000169247	1.19711	5.48441	16.9102	8.01e-14	1.06e-12	21.0377	79628	SH3TC2	SH3 domain and tetratricopeptide repeats 2 [Source:HGNC Symbol;Acc:HGNC:29427]	5	148923639	149063163	-1
ENSG00000183691	-7.81518	0.904558	-16.4999	1.3e-13	1.65e-12	21.0371	9241	NOG	noggin [Source:HGNC Symbol;Acc:HGNC:7866]	17	56593699	56595590	1
ENSG00000257060	-7.73224	0.0471175	-16.5036	1.3e-13	1.64e-12	21.0329		RP11-266O8.1		15	93312557	93569483	1
ENSG00000165716	-0.948295	4.89676	-16.7942	9.19e-14	1.2e-12	21.0296	138311	FAM69B	family with sequence similarity 69 member B [Source:HGNC Symbol;Acc:HGNC:28290]	9	136712570	136724050	1
ENSG00000165633	-4.72802	1.27524	-16.2808	1.7e-13	2.06e-12	21.0266	196740	VSTM4	V-set and transmembrane domain containing 4 [Source:HGNC Symbol;Acc:HGNC:26470]	10	49014245	49115509	-1
ENSG00000137942	0.601263	7.3824	17.0363	6.91e-14	9.23e-13	21.0128	54874	FNBP1L	formin binding protein 1 like [Source:HGNC Symbol;Acc:HGNC:20851]	1	93448131	93554661	1
ENSG00000166105	-3.7309	1.02648	-16.2459	1.77e-13	2.14e-12	21.0055	112937	GLB1L3	galactosidase beta 1 like 3 [Source:HGNC Symbol;Acc:HGNC:25147]	11	134274245	134319564	1
ENSG00000145362	0.906482	7.52759	17.0364	6.91e-14	9.23e-13	21.0039	287	ANK2	ankyrin 2, neuronal [Source:HGNC Symbol;Acc:HGNC:493]	4	112818109	113383740	1
ENSG00000121361	3.13092	0.357339	16.2263	1.82e-13	2.18e-12	20.9949	3764	KCNJ8	potassium voltage-gated channel subfamily J member 8 [Source:HGNC Symbol;Acc:HGNC:6269]	12	21764955	21775581	-1
ENSG00000254088	-2.17464	2.6222	-16.3216	1.62e-13	1.99e-12	20.9894		SLC2A3P4	solute carrier family 2 member 3 pseudogene 4 [Source:HGNC Symbol;Acc:HGNC:31076]	8	86503591	86505061	1
ENSG00000257178	-2.89005	1.33017	-16.2085	1.86e-13	2.22e-12	20.9868	406902	MIR10A	microRNA 10a [Source:HGNC Symbol;Acc:HGNC:31497]	17	48579630	48582259	-1
ENSG00000167123	-1.45215	3.76032	-16.5347	1.25e-13	1.59e-12	20.9826	51148	CERCAM	cerebral endothelial cell adhesion molecule [Source:HGNC Symbol;Acc:HGNC:23723]	9	128411751	128437351	1
ENSG00000181773	-1.73239	2.16066	-16.2709	1.72e-13	2.08e-12	20.9727	2827	GPR3	G protein-coupled receptor 3 [Source:HGNC Symbol;Acc:HGNC:4484]	1	27392644	27395814	1
ENSG00000183876	-4.59202	0.442174	-16.3348	1.59e-13	1.96e-12	20.9606	340075	ARSI	arylsulfatase family member I [Source:HGNC Symbol;Acc:HGNC:32521]	5	150296343	150339307	-1
ENSG00000231107	-4.85899	-1.22298	-16.5068	1.29e-13	1.63e-12	20.9574	101927873	LINC01508	long intergenic non-protein coding RNA 1508 [Source:HGNC Symbol;Acc:HGNC:51190]	9	90300902	90433505	-1
ENSG00000254535	-1.2633	3.44376	-16.4652	1.36e-13	1.71e-12	20.952	132430	PABPC4L	poly(A) binding protein cytoplasmic 4 like [Source:HGNC Symbol;Acc:HGNC:31955]	4	134196333	134201748	-1
ENSG00000122783	0.766689	5.57771	16.8524	8.58e-14	1.12e-12	20.9472	78996	C7orf49	chromosome 7 open reading frame 49 [Source:HGNC Symbol;Acc:HGNC:22432]	7	135092363	135170795	-1
ENSG00000136840	-1.93355	2.222	-16.2429	1.78e-13	2.14e-12	20.9392	27090	ST6GALNAC4	ST6 N-acetylgalactosaminide alpha-2,6-sialyltransferase 4 [Source:HGNC Symbol;Acc:HGNC:17846]	9	127907886	127917038	-1
ENSG00000103522	-2.40578	1.42372	-16.1733	1.94e-13	2.31e-12	20.9388	50615	IL21R	interleukin 21 receptor [Source:HGNC Symbol;Acc:HGNC:6006]	16	27402162	27452042	1
ENSG00000187210	1.30488	3.00458	16.4217	1.43e-13	1.79e-12	20.9377	2650	GCNT1	glucosaminyl (N-acetyl) transferase 1, core 2 [Source:HGNC Symbol;Acc:HGNC:4203]	9	76419850	76507416	1
ENSG00000164327	0.807855	5.47029	16.8141	8.97e-14	1.17e-12	20.9162	253260	RICTOR	RPTOR independent companion of MTOR complex 2 [Source:HGNC Symbol;Acc:HGNC:28611]	5	38937919	39074408	-1
ENSG00000026508	-4.87082	0.463834	-16.3167	1.63e-13	2e-12	20.9161	960	CD44	CD44 molecule (Indian blood group) [Source:HGNC Symbol;Acc:HGNC:1681]	11	35138870	35232402	1
ENSG00000182103	3.67884	0.34554	16.155	1.98e-13	2.36e-12	20.8998	220382	FAM181B	family with sequence similarity 181 member B [Source:HGNC Symbol;Acc:HGNC:28512]	11	82729941	82733864	-1
ENSG00000107518	0.726397	6.67091	16.9023	8.09e-14	1.06e-12	20.8937	26033	ATRNL1	attractin like 1 [Source:HGNC Symbol;Acc:HGNC:29063]	10	115093365	115948992	1
ENSG00000204282	1.3963	2.93201	16.3718	1.52e-13	1.89e-12	20.8926	100131096	TNRC6C-AS1	TNRC6C antisense RNA 1 [Source:HGNC Symbol;Acc:HGNC:44360]	17	78107398	78111799	-1
ENSG00000176092	-5.35488	0.121399	-16.3871	1.49e-13	1.86e-12	20.8867	55057	AIM1L	absent in melanoma 1-like [Source:HGNC Symbol;Acc:HGNC:17295]	1	26321859	26354130	-1
ENSG00000183778	-3.79646	0.417717	-16.2011	1.87e-13	2.24e-12	20.874	10317	B3GALT5	beta-1,3-galactosyltransferase 5 [Source:HGNC Symbol;Acc:HGNC:920]	21	39556442	39673137	1
ENSG00000244043	1.68509	3.92535	16.5211	1.27e-13	1.61e-12	20.8731		RPS27P27	ribosomal protein S27 pseudogene 27 [Source:HGNC Symbol;Acc:HGNC:36043]	16	59088837	59089091	1
ENSG00000116157	-1.23541	3.19931	-16.3508	1.56e-13	1.93e-12	20.8598	2882	GPX7	glutathione peroxidase 7 [Source:HGNC Symbol;Acc:HGNC:4559]	1	52602372	52609051	1
ENSG00000081377	0.69726	5.14729	16.7251	9.97e-14	1.29e-12	20.8583	8555	CDC14B	cell division cycle 14B [Source:HGNC Symbol;Acc:HGNC:1719]	9	96490241	96619830	-1
ENSG00000259498	-2.06547	1.63821	-16.1199	2.07e-13	2.46e-12	20.8542		RP11-244F12.3		15	63046034	63049387	-1
ENSG00000100228	-1.75999	2.36139	-16.1961	1.88e-13	2.25e-12	20.852	9609	RAB36	RAB36, member RAS oncogene family [Source:HGNC Symbol;Acc:HGNC:9775]	22	23145326	23164350	1
ENSG00000274499	-5.2289	-0.874958	-16.385	1.5e-13	1.86e-12	20.8501		RP11-403B2.10		15	20803505	20826173	-1
ENSG00000174099	-1.1024	4.45349	-16.5649	1.21e-13	1.54e-12	20.8466	253827	MSRB3	methionine sulfoxide reductase B3 [Source:HGNC Symbol;Acc:HGNC:27375]	12	65278643	65488244	1
ENSG00000134899	0.706176	5.80321	16.7924	9.21e-14	1.2e-12	20.8429	2073	ERCC5	ERCC excision repair 5, endonuclease [Source:HGNC Symbol;Acc:HGNC:3437]	13	102844844	102876001	1
ENSG00000223417	5.65897	-1.96545	16.3057	1.65e-13	2.01e-12	20.8353	399939	TRIM49D1	tripartite motif containing 49D1 [Source:HGNC Symbol;Acc:HGNC:43973]	11	89911111	89921767	-1
ENSG00000139219	0.685394	8.18506	16.9194	7.93e-14	1.05e-12	20.8272	1280	COL2A1	collagen type II alpha 1 chain [Source:HGNC Symbol;Acc:HGNC:2200]	12	47972965	48004486	-1
ENSG00000156219	4.13719	-0.588572	16.2294	1.81e-13	2.17e-12	20.8272	419	ART3	ADP-ribosyltransferase 3 [Source:HGNC Symbol;Acc:HGNC:725]	4	76011184	76112802	1
ENSG00000183049	-1.41091	2.94866	-16.267	1.73e-13	2.09e-12	20.8167	57118	CAMK1D	calcium/calmodulin dependent protein kinase ID [Source:HGNC Symbol;Acc:HGNC:19341]	10	12349482	12835545	1
ENSG00000107372	0.599648	7.44705	16.875	8.35e-14	1.09e-12	20.8122	7763	ZFAND5	zinc finger AN1-type containing 5 [Source:HGNC Symbol;Acc:HGNC:13008]	9	72351425	72365235	-1
ENSG00000082684	-6.82832	-0.519983	-16.3079	1.64e-13	2.01e-12	20.7994	54437	SEMA5B	semaphorin 5B [Source:HGNC Symbol;Acc:HGNC:10737]	3	122909193	123028605	-1
ENSG00000230148	-1.2287	3.33932	-16.3258	1.61e-13	1.98e-12	20.7987	100874362	HOXB-AS1	HOXB cluster antisense RNA 1 [Source:HGNC Symbol;Acc:HGNC:43744]	17	48543551	48551250	1
ENSG00000211689	-7.53916	-0.873654	-16.3016	1.66e-13	2.02e-12	20.7916	445347	TRGC1	T cell receptor gamma constant 1 [Source:HGNC Symbol;Acc:HGNC:12275]	7	38257879	38265678	-1
ENSG00000165566	-5.31467	-0.72732	-16.3126	1.64e-13	2e-12	20.7778	219287	AMER2	APC membrane recruitment protein 2 [Source:HGNC Symbol;Acc:HGNC:26360]	13	25161684	25172288	-1
ENSG00000122642	0.755654	5.44897	16.6983	1.03e-13	1.33e-12	20.7763	11328	FKBP9	FK506 binding protein 9 [Source:HGNC Symbol;Acc:HGNC:3725]	7	32957404	33006931	1
ENSG00000165061	-4.91293	0.0117947	-16.2885	1.68e-13	2.04e-12	20.7754	79698	ZMAT4	zinc finger matrin-type 4 [Source:HGNC Symbol;Acc:HGNC:25844]	8	40530590	40897833	-1
ENSG00000256152	1.59531	3.54403	16.3785	1.51e-13	1.87e-12	20.7752		RP11-463O12.3		12	122865335	122867021	1
ENSG00000259884	1.58686	2.35529	16.1766	1.93e-13	2.3e-12	20.7659		RP11-1100L3.8		12	52058459	52059503	-1
ENSG00000274750	-0.712149	7.40383	-16.8173	8.94e-14	1.17e-12	20.7513	8353	HIST1H3E	histone cluster 1, H3e [Source:HGNC Symbol;Acc:HGNC:4769]	6	26224199	26227473	1
ENSG00000085832	0.706967	6.03801	16.7399	9.8e-14	1.27e-12	20.7505	2060	EPS15	epidermal growth factor receptor pathway substrate 15 [Source:HGNC Symbol;Acc:HGNC:3419]	1	51354263	51519328	-1
ENSG00000184254	4.4724	0.504206	16.0354	2.29e-13	2.71e-12	20.7499	220	ALDH1A3	aldehyde dehydrogenase 1 family member A3 [Source:HGNC Symbol;Acc:HGNC:409]	15	100877714	100916626	1
ENSG00000169122	1.0604	4.20369	16.472	1.35e-13	1.7e-12	20.7353	90362	FAM110B	family with sequence similarity 110 member B [Source:HGNC Symbol;Acc:HGNC:28587]	8	57994509	58204279	1
ENSG00000275993	-4.00903	0.0768804	-16.1525	1.99e-13	2.36e-12	20.7288	102724428	CH507-42P11.8	Homo sapiens serine/threonine-protein kinase SIK1 (LOC102724428), mRNA. [Source:RefSeq mRNA;Acc:NM_001320643]	21	6111134	6123739	1
ENSG00000255201	-2.1763	1.86637	-16.0166	2.35e-13	2.76e-12	20.7101		RP11-350N15.4		8	38421889	38426096	1
ENSG00000091592	-1.19279	3.98922	-16.3579	1.55e-13	1.91e-12	20.6956	22861	NLRP1	NLR family pyrin domain containing 1 [Source:HGNC Symbol;Acc:HGNC:14374]	17	5499427	5619424	-1
ENSG00000145569	-6.75828	2.36103	-15.9924	2.42e-13	2.84e-12	20.69	54491	FAM105A	family with sequence similarity 105 member A [Source:HGNC Symbol;Acc:HGNC:25629]	5	14581775	14615007	1
ENSG00000257950	0.765061	6.1422	16.697	1.03e-13	1.33e-12	20.6869		P2RX5-TAX1BP3	P2RX5-TAX1BP3 readthrough (NMD candidate) [Source:HGNC Symbol;Acc:HGNC:49191]	17	3663063	3696194	-1
ENSG00000139182	-1.32097	3.93396	-16.3274	1.61e-13	1.98e-12	20.6773	9746	CLSTN3	calsyntenin 3 [Source:HGNC Symbol;Acc:HGNC:18371]	12	7129698	7158945	1
ENSG00000151718	-0.860263	5.82153	-16.6373	1.11e-13	1.42e-12	20.6745	80014	WWC2	WW and C2 domain containing 2 [Source:HGNC Symbol;Acc:HGNC:24148]	4	183099293	183320777	1
ENSG00000255112	0.654634	5.41015	16.6078	1.15e-13	1.47e-12	20.6696	57132	CHMP1B	charged multivesicular body protein 1B [Source:HGNC Symbol;Acc:HGNC:24287]	18	11851396	11854449	1
ENSG00000002745	-3.25856	0.240625	-16.0209	2.34e-13	2.75e-12	20.6679	51384	WNT16	Wnt family member 16 [Source:HGNC Symbol;Acc:HGNC:16267]	7	121325367	121341104	1
ENSG00000254979	1.17908	3.6445	16.3176	1.63e-13	1.99e-12	20.6669		RP11-872D17.8		11	57387365	57424059	-1
ENSG00000250722	-5.28947	1.18477	-16.0091	2.37e-13	2.78e-12	20.6592	6414	SEPP1	selenoprotein P, plasma, 1 [Source:HGNC Symbol;Acc:HGNC:10751]	5	42799880	42887392	-1
ENSG00000144619	-1.17303	3.93429	-16.3065	1.65e-13	2.01e-12	20.6421	152330	CNTN4	contactin 4 [Source:HGNC Symbol;Acc:HGNC:2174]	3	2098813	3057956	1
ENSG00000142733	-1.40817	3.95019	-16.2952	1.67e-13	2.03e-12	20.6393	9064	MAP3K6	mitogen-activated protein kinase kinase kinase 6 [Source:HGNC Symbol;Acc:HGNC:6858]	1	27355184	27366892	-1
ENSG00000008394	0.694012	7.10167	16.7161	1.01e-13	1.3e-12	20.6363	4257	MGST1	microsomal glutathione S-transferase 1 [Source:HGNC Symbol;Acc:HGNC:7061]	12	16347142	16609259	1
ENSG00000198771	-4.14747	0.441847	-16.0083	2.37e-13	2.78e-12	20.6252	92241	RCSD1	RCSD domain containing 1 [Source:HGNC Symbol;Acc:HGNC:28310]	1	167630093	167706249	1
ENSG00000186104	0.846665	4.41605	16.4185	1.44e-13	1.8e-12	20.6202	120227	CYP2R1	cytochrome P450 family 2 subfamily R member 1 [Source:HGNC Symbol;Acc:HGNC:20580]	11	14877440	14892252	-1
ENSG00000220785	-1.81958	2.64966	-16.042	2.28e-13	2.69e-12	20.6151		MTMR9LP	myotubularin related protein 9-like, pseudogene [Source:HGNC Symbol;Acc:HGNC:27920]	1	32231658	32241620	-1
ENSG00000122565	0.661723	8.18545	16.7219	1e-13	1.3e-12	20.5844	11335	CBX3	chromobox 3 [Source:HGNC Symbol;Acc:HGNC:1553]	7	26201162	26213356	1
ENSG00000066382	-3.77689	0.856263	-15.906	2.69e-13	3.12e-12	20.5826	744	MPPED2	metallophosphoesterase domain containing 2 [Source:HGNC Symbol;Acc:HGNC:1180]	11	30384493	30586872	-1
ENSG00000070214	-0.855533	4.50972	-16.37	1.53e-13	1.89e-12	20.5779	23446	SLC44A1	solute carrier family 44 member 1 [Source:HGNC Symbol;Acc:HGNC:18798]	9	105244622	105439171	1
ENSG00000277801	1.71345	2.57268	16.055	2.24e-13	2.65e-12	20.5761		RP11-681H18.2		14	89156743	89157574	1
ENSG00000170396	-1.72287	2.78171	-16.0254	2.32e-13	2.74e-12	20.564	91752	ZNF804A	zinc finger protein 804A [Source:HGNC Symbol;Acc:HGNC:21711]	2	184598366	184939492	1
ENSG00000172819	-1.02942	4.30501	-16.3145	1.63e-13	2e-12	20.5619	5916	RARG	retinoic acid receptor gamma [Source:HGNC Symbol;Acc:HGNC:9866]	12	53210567	53232980	-1
ENSG00000170445	0.583493	6.69762	16.6347	1.11e-13	1.42e-12	20.5618	3035	HARS	histidyl-tRNA synthetase [Source:HGNC Symbol;Acc:HGNC:4816]	5	140673173	140692024	-1
ENSG00000197448	0.960279	4.12018	16.3066	1.65e-13	2.01e-12	20.5449	373156	GSTK1	glutathione S-transferase kappa 1 [Source:HGNC Symbol;Acc:HGNC:16906]	7	143244093	143270854	1
ENSG00000138193	1.18322	3.82617	16.2442	1.78e-13	2.14e-12	20.5346	51196	PLCE1	phospholipase C epsilon 1 [Source:HGNC Symbol;Acc:HGNC:17175]	10	94030812	94332823	1
ENSG00000138166	-1.43353	2.93715	-16.0312	2.31e-13	2.72e-12	20.5237	1847	DUSP5	dual specificity phosphatase 5 [Source:HGNC Symbol;Acc:HGNC:3071]	10	110497838	110511544	1
ENSG00000188488	-2.51419	1.47297	-15.8337	2.95e-13	3.38e-12	20.5194	5104	SERPINA5	serpin family A member 5 [Source:HGNC Symbol;Acc:HGNC:8723]	14	94561442	94593120	1
ENSG00000103150	1.13781	3.82563	16.2317	1.8e-13	2.17e-12	20.5182	23417	MLYCD	malonyl-CoA decarboxylase [Source:HGNC Symbol;Acc:HGNC:7150]	16	83899126	83927026	1
ENSG00000034510	0.597913	9.56176	16.7145	1.01e-13	1.3e-12	20.5165	9168	TMSB10	thymosin beta 10 [Source:HGNC Symbol;Acc:HGNC:11879]	2	84905625	84906675	1
ENSG00000196208	-0.665737	6.17739	-16.5426	1.24e-13	1.57e-12	20.5063	9687	GREB1	growth regulation by estrogen in breast cancer 1 [Source:HGNC Symbol;Acc:HGNC:24885]	2	11482341	11642788	1
ENSG00000279207	0.863497	4.24677	16.2878	1.69e-13	2.05e-12	20.4926		RP11-159D12.8		17	58095672	58101479	1
ENSG00000132821	-5.92847	-1.33114	-16.0687	2.2e-13	2.61e-12	20.4917	128434	VSTM2L	V-set and transmembrane domain containing 2 like [Source:HGNC Symbol;Acc:HGNC:16096]	20	37903104	37945350	1
ENSG00000184557	-3.25693	1.71751	-15.8	3.07e-13	3.51e-12	20.4796	9021	SOCS3	suppressor of cytokine signaling 3 [Source:HGNC Symbol;Acc:HGNC:19391]	17	78356778	78360077	-1
ENSG00000271474	-2.4091	0.831508	-15.7868	3.12e-13	3.55e-12	20.4679		RP11-710C12.1		4	95549129	95552457	1
ENSG00000150722	3.41518	0.636058	15.7707	3.19e-13	3.61e-12	20.4493	151242	PPP1R1C	protein phosphatase 1 regulatory inhibitor subunit 1C [Source:HGNC Symbol;Acc:HGNC:14940]	2	181954241	182131398	1
ENSG00000137831	1.01576	6.00422	16.4878	1.32e-13	1.67e-12	20.4442	55075	UACA	uveal autoantigen with coiled-coil domains and ankyrin repeats [Source:HGNC Symbol;Acc:HGNC:15947]	15	70654554	70763593	-1
ENSG00000112773	0.918313	5.79505	16.4562	1.37e-13	1.73e-12	20.4287	55603	FAM46A	family with sequence similarity 46 member A [Source:HGNC Symbol;Acc:HGNC:18345]	6	81491439	81752774	-1
ENSG00000177706	-4.5887	0.426822	-15.8708	2.81e-13	3.24e-12	20.4218	56975	FAM20C	family with sequence similarity 20 member C [Source:HGNC Symbol;Acc:HGNC:22140]	7	192969	260745	1
ENSG00000083290	0.60457	5.71612	16.4249	1.43e-13	1.79e-12	20.3973	9706	ULK2	unc-51 like autophagy activating kinase 2 [Source:HGNC Symbol;Acc:HGNC:13480]	17	19770829	19867936	-1
ENSG00000113448	0.82021	4.78477	16.3009	1.66e-13	2.02e-12	20.3972	5144	PDE4D	phosphodiesterase 4D [Source:HGNC Symbol;Acc:HGNC:8783]	5	58969038	60522120	-1
ENSG00000225706	-3.56931	0.055861	-15.8378	2.93e-13	3.36e-12	20.3972		PTPRD-AS1	PTPRD antisense RNA 1 [Source:HGNC Symbol;Acc:HGNC:49753]	9	8858130	8862255	1
ENSG00000268869	-5.79386	-0.934371	-15.9701	2.49e-13	2.91e-12	20.3938	284729	ESPNP	espin pseudogene [Source:HGNC Symbol;Acc:HGNC:23285]	1	16687339	16720157	-1
ENSG00000164610	0.843006	4.54593	16.2527	1.76e-13	2.12e-12	20.3848	6100	RP9	retinitis pigmentosa 9 (autosomal dominant) [Source:HGNC Symbol;Acc:HGNC:10288]	7	33094797	33109401	-1
ENSG00000205978	-1.39099	3.86209	-16.076	2.18e-13	2.59e-12	20.381	57523	NYNRIN	NYN domain and retroviral integrase containing [Source:HGNC Symbol;Acc:HGNC:20165]	14	24398786	24419288	1
ENSG00000260880	4.92394	-1.57304	15.9052	2.7e-13	3.12e-12	20.3797	283902	HCCAT5	hepatocellular carcinoma associated transcript 5 (non-protein coding) [Source:HGNC Symbol;Acc:HGNC:48612]	16	73092349	73093774	1
ENSG00000207955	-4.01421	0.0371211	-15.8567	2.86e-13	3.29e-12	20.3786	407003	MIR219A2	microRNA 219a-2 [Source:HGNC Symbol;Acc:HGNC:31598]	9	128392007	128393510	-1
ENSG00000118094	1.18789	3.78571	16.1075	2.1e-13	2.49e-12	20.3707	11181	TREH	trehalase [Source:HGNC Symbol;Acc:HGNC:12266]	11	118657316	118679690	-1
ENSG00000166619	-0.779571	5.08692	-16.2969	1.67e-13	2.03e-12	20.3656	10904	BLCAP	bladder cancer associated protein [Source:HGNC Symbol;Acc:HGNC:1055]	20	37492472	37527931	-1
ENSG00000133019	-2.42639	1.80154	-15.7268	3.37e-13	3.79e-12	20.3613	1131	CHRM3	cholinergic receptor muscarinic 3 [Source:HGNC Symbol;Acc:HGNC:1952]	1	239386565	239915452	1
ENSG00000207501	-1.20865	3.27881	-15.9683	2.49e-13	2.91e-12	20.3594	101954266	RNVU1-14	RNA, variant U1 small nuclear 14 [Source:HGNC Symbol;Acc:HGNC:48319]	1	145281116	145281279	1
ENSG00000167004	-0.543614	7.74929	-16.5108	1.29e-13	1.63e-12	20.3507	2923	PDIA3	protein disulfide isomerase family A member 3 [Source:HGNC Symbol;Acc:HGNC:4606]	15	43746392	43773279	1
ENSG00000196295	1.15943	4.59444	16.2292	1.81e-13	2.17e-12	20.35		AC005154.6		7	30516309	30594809	-1
ENSG00000277081	-6.1651	-2.08827	-15.967	2.5e-13	2.92e-12	20.3428		RMST_10	Rhabdomyosarcoma 2 associated transcript conserved region 10 [Source:RFAM;Acc:RF01971]	12	97564174	97564327	1
ENSG00000154767	0.685552	5.97969	16.4029	1.47e-13	1.82e-12	20.3375	7508	XPC	XPC complex subunit, DNA damage recognition and repair factor [Source:HGNC Symbol;Acc:HGNC:12816]	3	14145147	14178783	-1
ENSG00000187867	-2.84159	2.1865	-15.725	3.37e-13	3.8e-12	20.3366	342979	PALM3	paralemmin 3 [Source:HGNC Symbol;Acc:HGNC:33274]	19	14053365	14059159	-1
ENSG00000130787	-1.3039	3.74326	-16.0243	2.33e-13	2.74e-12	20.3353	9026	HIP1R	huntingtin interacting protein 1 related [Source:HGNC Symbol;Acc:HGNC:18415]	12	122834453	122862960	1
ENSG00000248643	0.60158	7.49084	16.4883	1.32e-13	1.67e-12	20.3309	100526737	RBM14-RBM4	RBM14-RBM4 readthrough [Source:HGNC Symbol;Acc:HGNC:38840]	11	66616626	66646469	1
ENSG00000206432	0.686331	5.32824	16.3234	1.61e-13	1.98e-12	20.3273	645369	TMEM200C	transmembrane protein 200C [Source:HGNC Symbol;Acc:HGNC:37208]	18	5882072	5895955	-1
ENSG00000136504	0.632174	6.41006	16.4285	1.42e-13	1.78e-12	20.327	11143	KAT7	lysine acetyltransferase 7 [Source:HGNC Symbol;Acc:HGNC:17016]	17	49788555	49835030	1
ENSG00000151553	0.84623	4.93788	16.2622	1.74e-13	2.1e-12	20.3194	57700	FAM160B1	family with sequence similarity 160 member B1 [Source:HGNC Symbol;Acc:HGNC:29320]	10	114821744	114899832	1
ENSG00000196739	-1.19992	3.7246	-16.0131	2.36e-13	2.77e-12	20.3189	85301	COL27A1	collagen type XXVII alpha 1 chain [Source:HGNC Symbol;Acc:HGNC:22986]	9	114155560	114312511	1
ENSG00000263874	-1.22789	3.27478	-15.9298	2.61e-13	3.04e-12	20.3125		LINC00672	long intergenic non-protein coding RNA 672 [Source:HGNC Symbol;Acc:HGNC:44353]	17	38925168	38929384	1
ENSG00000186340	-6.31927	1.17358	-15.7913	3.11e-13	3.54e-12	20.3116	7058	THBS2	thrombospondin 2 [Source:HGNC Symbol;Acc:HGNC:11786]	6	169215780	169254044	-1
ENSG00000136111	-0.990074	5.53916	-16.308	1.64e-13	2.01e-12	20.3107	9882	TBC1D4	TBC1 domain family member 4 [Source:HGNC Symbol;Acc:HGNC:19165]	13	75284665	75482114	-1
ENSG00000184220	0.851767	5.01729	16.2644	1.73e-13	2.1e-12	20.3076	84319	CMSS1	cms1 ribosomal small subunit homolog (yeast) [Source:HGNC Symbol;Acc:HGNC:28666]	3	99817834	100181732	1
ENSG00000116096	3.6899	0.0610886	15.6778	3.58e-13	4.01e-12	20.299	6697	SPR	sepiapterin reductase (7,8-dihydrobiopterin:NADP+ oxidoreductase) [Source:HGNC Symbol;Acc:HGNC:11257]	2	72887360	72892158	1
ENSG00000102931	0.683083	6.42949	16.4054	1.46e-13	1.82e-12	20.2966	23568	ARL2BP	ADP ribosylation factor like GTPase 2 binding protein [Source:HGNC Symbol;Acc:HGNC:17146]	16	57245098	57253635	1
ENSG00000130962	0.786483	4.64097	16.1976	1.88e-13	2.25e-12	20.2952	5638	PRRG1	proline rich and Gla domain 1 [Source:HGNC Symbol;Acc:HGNC:9469]	X	37349275	37457295	1
ENSG00000243701	1.16739	3.42543	15.9833	2.45e-13	2.87e-12	20.2924	344595	DUBR	DPPA2 upstream binding RNA [Source:HGNC Symbol;Acc:HGNC:48569]	3	107240692	107326964	1
ENSG00000196159	-1.42606	2.72524	-15.804	3.06e-13	3.49e-12	20.2756	79633	FAT4	FAT atypical cadherin 4 [Source:HGNC Symbol;Acc:HGNC:23109]	4	125316399	125492932	1
ENSG00000101938	-4.00101	1.04933	-15.6402	3.75e-13	4.18e-12	20.2677	91851	CHRDL1	chordin like 1 [Source:HGNC Symbol;Acc:HGNC:29861]	X	110673856	110795819	-1
ENSG00000233138	-4.45199	-0.826988	-15.8763	2.79e-13	3.22e-12	20.2663		RP1-67K17.3		6	142748443	142753759	1
ENSG00000204516	-2.37398	1.75737	-15.6502	3.71e-13	4.13e-12	20.2661	4277	MICB	MHC class I polypeptide-related sequence B [Source:HGNC Symbol;Acc:HGNC:7091]	6	31494881	31511124	1
ENSG00000160691	-0.726893	7.1063	-16.4119	1.45e-13	1.81e-12	20.2659	6464	SHC1	SHC adaptor protein 1 [Source:HGNC Symbol;Acc:HGNC:10840]	1	154962298	154974395	-1
ENSG00000112320	-1.24467	3.49334	-15.9274	2.62e-13	3.04e-12	20.263	55084	SOBP	sine oculis binding protein homolog [Source:HGNC Symbol;Acc:HGNC:29256]	6	107489958	107660167	1
ENSG00000150977	-1.38324	2.74691	-15.7965	3.09e-13	3.52e-12	20.2593	196383	RILPL2	Rab interacting lysosomal protein like 2 [Source:HGNC Symbol;Acc:HGNC:28787]	12	123410683	123436717	-1
ENSG00000134323	0.792349	5.72414	16.3121	1.64e-13	2e-12	20.2556	4613	MYCN	v-myc avian myelocytomatosis viral oncogene neuroblastoma derived homolog [Source:HGNC Symbol;Acc:HGNC:7559]	2	15940564	15947007	1
ENSG00000276023	0.642382	5.10416	16.2364	1.79e-13	2.16e-12	20.2552	11072	DUSP14	dual specificity phosphatase 14 [Source:HGNC Symbol;Acc:HGNC:17007]	17	37489831	37513501	1
ENSG00000142192	-0.521217	8.65515	-16.4596	1.37e-13	1.72e-12	20.2405	351	APP	amyloid beta precursor protein [Source:HGNC Symbol;Acc:HGNC:620]	21	25880550	26171128	-1
ENSG00000108852	0.73341	5.00548	16.1951	1.89e-13	2.26e-12	20.221	4355	MPP2	membrane palmitoylated protein 2 [Source:HGNC Symbol;Acc:HGNC:7220]	17	43875357	43909711	-1
ENSG00000231991	0.707568	7.97715	16.418	1.44e-13	1.8e-12	20.2163		ANXA2P2	annexin A2 pseudogene 2 [Source:HGNC Symbol;Acc:HGNC:539]	9	33624274	33625293	1
ENSG00000162378	0.558574	7.17974	16.381	1.51e-13	1.87e-12	20.2142	79699	ZYG11B	zyg-11 family member B, cell cycle regulator [Source:HGNC Symbol;Acc:HGNC:25820]	1	52726467	52827342	1
ENSG00000257181	0.815811	5.8628	16.2931	1.67e-13	2.03e-12	20.2141		RP11-611O2.5		12	68841288	68843237	-1
ENSG00000214491	-3.5729	0.744023	-15.5992	3.95e-13	4.37e-12	20.2072	730005	SEC14L6	SEC14 like lipid binding 6 [Source:HGNC Symbol;Acc:HGNC:40047]	22	30522799	30546682	-1
ENSG00000123104	-1.08667	6.6145	-16.3293	1.6e-13	1.97e-12	20.2068	3709	ITPR2	inositol 1,4,5-trisphosphate receptor type 2 [Source:HGNC Symbol;Acc:HGNC:6181]	12	26336515	26833198	-1
ENSG00000084444	-1.06411	4.00951	-15.9775	2.46e-13	2.89e-12	20.202	57613	FAM234B	family with sequence similarity 234 member B [Source:HGNC Symbol;Acc:HGNC:29288]	12	13044284	13142521	1
ENSG00000125378	-5.13135	0.719738	-15.675	3.59e-13	4.02e-12	20.198	652	BMP4	bone morphogenetic protein 4 [Source:HGNC Symbol;Acc:HGNC:1071]	14	53949736	53958761	-1
ENSG00000074181	-1.04371	5.1582	-16.1623	1.96e-13	2.34e-12	20.1957	4854	NOTCH3	notch 3 [Source:HGNC Symbol;Acc:HGNC:7883]	19	15159038	15200981	-1
ENSG00000186951	1.12209	3.75379	15.9654	2.5e-13	2.92e-12	20.1956	5465	PPARA	peroxisome proliferator activated receptor alpha [Source:HGNC Symbol;Acc:HGNC:9232]	22	46150521	46243756	1
ENSG00000079739	-0.708609	6.43745	-16.313	1.63e-13	2e-12	20.1933	5236	PGM1	phosphoglucomutase 1 [Source:HGNC Symbol;Acc:HGNC:8905]	1	63593276	63660245	1
ENSG00000170962	-2.64029	1.6376	-15.5747	4.07e-13	4.49e-12	20.1876	80310	PDGFD	platelet derived growth factor D [Source:HGNC Symbol;Acc:HGNC:30620]	11	103907186	104164379	-1
ENSG00000158552	-0.822248	4.40805	-16.0447	2.27e-13	2.68e-12	20.1867	130617	ZFAND2B	zinc finger AN1-type containing 2B [Source:HGNC Symbol;Acc:HGNC:25206]	2	219195237	219209651	1
ENSG00000272398	-0.65915	6.87551	-16.3352	1.59e-13	1.96e-12	20.1843	100133941	CD24	CD24 molecule [Source:HGNC Symbol;Acc:HGNC:1645]	6	106969831	106975627	-1
ENSG00000095397	-3.08389	0.620694	-15.571	4.09e-13	4.5e-12	20.1783	25861	WHRN	whirlin [Source:HGNC Symbol;Acc:HGNC:16361]	9	114402080	114505450	-1
ENSG00000111199	3.38786	-0.00411739	15.5754	4.07e-13	4.48e-12	20.1752	59341	TRPV4	transient receptor potential cation channel subfamily V member 4 [Source:HGNC Symbol;Acc:HGNC:18083]	12	109783085	109833401	-1
ENSG00000231064	-1.57027	3.66596	-15.8651	2.83e-13	3.26e-12	20.1669	693235	MIR92B	microRNA 92b [Source:HGNC Symbol;Acc:HGNC:32920]	1	155195004	155205495	1
ENSG00000109255	-5.529	-1.79363	-15.7991	3.08e-13	3.51e-12	20.153	10874	NMU	neuromedin U [Source:HGNC Symbol;Acc:HGNC:7859]	4	55595229	55636698	-1
ENSG00000214046	0.622845	6.24031	16.2702	1.72e-13	2.08e-12	20.1428	79086	SMIM7	small integral membrane protein 7 [Source:HGNC Symbol;Acc:HGNC:28419]	19	16630751	16660442	-1
ENSG00000196961	-0.70905	6.0303	-16.2355	1.8e-13	2.16e-12	20.1388	160	AP2A1	adaptor related protein complex 2 alpha 1 subunit [Source:HGNC Symbol;Acc:HGNC:561]	19	49766968	49807113	1
ENSG00000117069	-2.74402	4.03209	-15.8164	3.01e-13	3.44e-12	20.1223	81849	ST6GALNAC5	ST6 N-acetylgalactosaminide alpha-2,6-sialyltransferase 5 [Source:HGNC Symbol;Acc:HGNC:19342]	1	76867441	77065711	1
ENSG00000225783	-2.3635	3.51145	-15.7555	3.25e-13	3.67e-12	20.1208	440823	MIAT	myocardial infarction associated transcript (non-protein coding) [Source:HGNC Symbol;Acc:HGNC:33425]	22	26646428	26676475	1
ENSG00000137628	-1.87204	2.4665	-15.6066	3.91e-13	4.33e-12	20.0947	55601	DDX60	DEXD/H-box helicase 60 [Source:HGNC Symbol;Acc:HGNC:25942]	4	168216293	168318807	-1
ENSG00000139835	-1.2219	3.26991	-15.7566	3.24e-13	3.67e-12	20.0909	79774	GRTP1	growth hormone regulated TBC protein 1 [Source:HGNC Symbol;Acc:HGNC:20310]	13	113324164	113364148	-1
ENSG00000146674	-3.62291	2.62335	-15.5385	4.27e-13	4.68e-12	20.0862	3486	IGFBP3	insulin like growth factor binding protein 3 [Source:HGNC Symbol;Acc:HGNC:5472]	7	45912245	45921874	-1
ENSG00000134762	-2.9705	0.840752	-15.4813	4.59e-13	5e-12	20.083	1825	DSC3	desmocollin 3 [Source:HGNC Symbol;Acc:HGNC:3037]	18	30990008	31042815	-1
ENSG00000280064	-1.19489	3.67487	-15.8184	3e-13	3.44e-12	20.0804		RP11-205M5.3		8	37858949	37861333	1
ENSG00000163251	2.12125	1.71145	15.5317	4.3e-13	4.71e-12	20.063	7855	FZD5	frizzled class receptor 5 [Source:HGNC Symbol;Acc:HGNC:4043]	2	207762586	207769563	-1
ENSG00000275372	3.44401	0.113203	15.4764	4.61e-13	5.03e-12	20.0617		ZEB2_AS1_1	ZEB2 antisense RNA 1 conserved region 1 [Source:RFAM;Acc:RF01984]	2	144518447	144518574	1
ENSG00000124074	-1.51381	2.88638	-15.6506	3.7e-13	4.13e-12	20.0518	84080	ENKD1	enkurin domain containing 1 [Source:HGNC Symbol;Acc:HGNC:25246]	16	67662945	67667265	-1
ENSG00000167912	2.69034	0.962354	15.4523	4.76e-13	5.18e-12	20.0419		RP11-25K19.1		8	59119040	59121346	1
ENSG00000224729	-2.66023	1.95505	-15.4797	4.6e-13	5.01e-12	20.0411	100129845	PCOLCE-AS1	PCOLCE antisense RNA 1 [Source:HGNC Symbol;Acc:HGNC:40430]	7	100589402	100604206	-1
ENSG00000135540	-0.98513	4.62496	-15.9448	2.57e-13	2.99e-12	20.021	57224	NHSL1	NHS like 1 [Source:HGNC Symbol;Acc:HGNC:21021]	6	138422043	138692571	-1
ENSG00000182916	-1.49151	3.2402	-15.681	3.56e-13	4e-12	20.0164	56849	TCEAL7	transcription elongation factor A like 7 [Source:HGNC Symbol;Acc:HGNC:28336]	X	103330196	103332326	1
ENSG00000069667	-1.28417	3.15637	-15.6749	3.59e-13	4.02e-12	20.0133	6095	RORA	RAR related orphan receptor A [Source:HGNC Symbol;Acc:HGNC:10258]	15	60488284	61229319	-1
ENSG00000077327	-5.22838	-0.630133	-15.6331	3.79e-13	4.21e-12	20.0084	9576	SPAG6	sperm associated antigen 6 [Source:HGNC Symbol;Acc:HGNC:11215]	10	22345445	22454224	1
ENSG00000115363	-6.14571	-1.53647	-15.6462	3.72e-13	4.15e-12	20.0049	84141	EVA1A	eva-1 homolog A, regulator of programmed cell death [Source:HGNC Symbol;Acc:HGNC:25816]	2	75469302	75569722	-1
ENSG00000214063	-1.20901	4.47712	-15.893	2.74e-13	3.16e-12	20	7106	TSPAN4	tetraspanin 4 [Source:HGNC Symbol;Acc:HGNC:11859]	11	842808	867116	1
ENSG00000182944	0.639759	8.36162	16.2506	1.76e-13	2.13e-12	19.9861	2130	EWSR1	EWS RNA binding protein 1 [Source:HGNC Symbol;Acc:HGNC:3508]	22	29268009	29300525	1
ENSG00000166526	0.561584	6.72887	16.1645	1.96e-13	2.33e-12	19.9689	7551	ZNF3	zinc finger protein 3 [Source:HGNC Symbol;Acc:HGNC:13089]	7	100064033	100082548	-1
ENSG00000146416	-1.35404	4.052	-15.7873	3.12e-13	3.55e-12	19.9668	51390	AIG1	androgen induced 1 [Source:HGNC Symbol;Acc:HGNC:21607]	6	143060496	143340304	1
ENSG00000274904	-2.92632	1.56395	-15.3928	5.13e-13	5.55e-12	19.9664		CTD-2515O10.5		16	30064306	30064825	-1
ENSG00000116962	0.709878	7.11214	16.1807	1.92e-13	2.29e-12	19.9647	4811	NID1	nidogen 1 [Source:HGNC Symbol;Acc:HGNC:7821]	1	235975830	236065162	-1
ENSG00000166682	1.74792	2.38797	15.5401	4.26e-13	4.67e-12	19.9536	80975	TMPRSS5	transmembrane protease, serine 5 [Source:HGNC Symbol;Acc:HGNC:14908]	11	113687550	113706373	-1
ENSG00000121753	-2.06249	1.81054	-15.4078	5.03e-13	5.46e-12	19.9405	576	ADGRB2	adhesion G protein-coupled receptor B2 [Source:HGNC Symbol;Acc:HGNC:944]	1	31727117	31764893	-1
ENSG00000153898	3.53084	-0.433604	15.4293	4.9e-13	5.32e-12	19.9402	255231	MCOLN2	mucolipin 2 [Source:HGNC Symbol;Acc:HGNC:13357]	1	84925583	84997113	-1
ENSG00000165338	-0.83717	5.89335	-16.0616	2.22e-13	2.63e-12	19.9392	143279	HECTD2	HECT domain E3 ubiquitin protein ligase 2 [Source:HGNC Symbol;Acc:HGNC:26736]	10	91409280	91514829	1
ENSG00000273149	0.525258	8.99682	16.222	1.83e-13	2.19e-12	19.9214		RP11-290D2.6		13	45340039	45341183	1
ENSG00000256664	0.77217	4.86412	15.9313	2.61e-13	3.03e-12	19.9113		RP11-611O2.3		12	68841946	68842384	1
ENSG00000077238	-2.18749	3.58536	-15.6135	3.88e-13	4.3e-12	19.9073	3566	IL4R	interleukin 4 receptor [Source:HGNC Symbol;Acc:HGNC:6015]	16	27313668	27364778	1
ENSG00000145934	-6.61853	0.619556	-15.5105	4.42e-13	4.83e-12	19.901	57451	TENM2	teneurin transmembrane protein 2 [Source:HGNC Symbol;Acc:HGNC:29943]	5	167284799	168264157	1
ENSG00000113273	0.644499	5.99128	16.056	2.24e-13	2.65e-12	19.8966	411	ARSB	arylsulfatase B [Source:HGNC Symbol;Acc:HGNC:714]	5	78777209	78986087	-1
ENSG00000143126	1.3433	4.64334	15.8725	2.81e-13	3.24e-12	19.8892	1952	CELSR2	cadherin EGF LAG seven-pass G-type receptor 2 [Source:HGNC Symbol;Acc:HGNC:3231]	1	109250019	109275750	1
ENSG00000250602	2.31202	0.707217	15.3226	5.61e-13	5.99e-12	19.8842		RP11-517I3.1		5	126433505	126490371	-1
ENSG00000124126	0.80981	7.86405	16.1493	2e-13	2.37e-12	19.8823	57580	PREX1	phosphatidylinositol-3,4,5-trisphosphate dependent Rac exchange factor 1 [Source:HGNC Symbol;Acc:HGNC:32594]	20	48624252	48827883	-1
ENSG00000276644	-5.93411	1.72807	-15.3425	5.47e-13	5.86e-12	19.8791	1602	DACH1	dachshund family transcription factor 1 [Source:HGNC Symbol;Acc:HGNC:2663]	13	71437966	71867192	-1
ENSG00000116044	0.630153	5.91286	16.0339	2.3e-13	2.71e-12	19.8772	4780	NFE2L2	nuclear factor, erythroid 2 like 2 [Source:HGNC Symbol;Acc:HGNC:7782]	2	177227595	177392697	-1
ENSG00000224818	2.62574	0.697814	15.3092	5.71e-13	6.07e-12	19.869		RP11-134G8.10		1	201464383	201465146	-1
ENSG00000023839	-0.838107	5.37423	-15.9439	2.57e-13	2.99e-12	19.8673	1244	ABCC2	ATP binding cassette subfamily C member 2 [Source:HGNC Symbol;Acc:HGNC:53]	10	99782732	99852192	1
ENSG00000105939	0.774014	4.91613	15.8998	2.71e-13	3.14e-12	19.8607	56829	ZC3HAV1	zinc finger CCCH-type containing, antiviral 1 [Source:HGNC Symbol;Acc:HGNC:23721]	7	139043520	139109719	-1
ENSG00000100485	0.596516	6.0191	16.0264	2.32e-13	2.73e-12	19.8554	6655	SOS2	SOS Ras/Rho guanine nucleotide exchange factor 2 [Source:HGNC Symbol;Acc:HGNC:11188]	14	50117120	50231558	-1
ENSG00000137642	-2.13205	2.50265	-15.4138	5e-13	5.42e-12	19.8554	6653	SORL1	sortilin related receptor 1 [Source:HGNC Symbol;Acc:HGNC:11185]	11	121452203	121633693	1
ENSG00000105997	-1.5019	3.42429	-15.5789	4.05e-13	4.47e-12	19.8457	3200	HOXA3	homeobox A3 [Source:HGNC Symbol;Acc:HGNC:5104]	7	27106184	27152581	-1
ENSG00000125170	-0.865935	4.85964	-15.838	2.93e-13	3.36e-12	19.8286	55715	DOK4	docking protein 4 [Source:HGNC Symbol;Acc:HGNC:19868]	16	57471922	57487327	-1
ENSG00000107669	0.637829	5.65678	15.9607	2.52e-13	2.94e-12	19.8164	11101	ATE1	arginyltransferase 1 [Source:HGNC Symbol;Acc:HGNC:782]	10	121740421	121928801	-1
ENSG00000135108	0.564041	6.86074	16.0423	2.28e-13	2.69e-12	19.8041	23014	FBXO21	F-box protein 21 [Source:HGNC Symbol;Acc:HGNC:13592]	12	117141988	117190531	-1
ENSG00000111058	-0.771958	4.79889	-15.809	3.04e-13	3.47e-12	19.7987	79611	ACSS3	acyl-CoA synthetase short-chain family member 3 [Source:HGNC Symbol;Acc:HGNC:24723]	12	80936414	81261205	1
ENSG00000159445	1.20993	3.18885	15.5528	4.19e-13	4.6e-12	19.7902	117145	THEM4	thioesterase superfamily member 4 [Source:HGNC Symbol;Acc:HGNC:17947]	1	151873584	151909808	-1
ENSG00000095777	-3.23585	0.656816	-15.2509	6.15e-13	6.5e-12	19.779	53904	MYO3A	myosin IIIA [Source:HGNC Symbol;Acc:HGNC:7601]	10	25934267	26212527	1
ENSG00000052850	-6.54181	2.27156	-15.246	6.19e-13	6.54e-12	19.776	60529	ALX4	ALX homeobox 4 [Source:HGNC Symbol;Acc:HGNC:450]	11	44260444	44310166	-1
ENSG00000258610	-1.04741	3.91555	-15.6236	3.83e-13	4.26e-12	19.7655		RP11-488C13.7		14	76778952	76782249	1
ENSG00000230798	0.680411	5.59939	15.9134	2.67e-13	3.09e-12	19.7637	100996301	FOXD3-AS1	FOXD3 antisense RNA 1 (head to head) [Source:HGNC Symbol;Acc:HGNC:40241]	1	63320884	63324441	-1
ENSG00000008196	0.738014	7.36024	16.0334	2.3e-13	2.71e-12	19.7621	7021	TFAP2B	transcription factor AP-2 beta [Source:HGNC Symbol;Acc:HGNC:11743]	6	50818723	50847613	1
ENSG00000184677	0.556801	6.2769	15.9713	2.48e-13	2.91e-12	19.7585	9923	ZBTB40	zinc finger and BTB domain containing 40 [Source:HGNC Symbol;Acc:HGNC:29045]	1	22451851	22531157	1
ENSG00000135502	-1.75559	2.26609	-15.322	5.62e-13	5.99e-12	19.753	65012	SLC26A10	solute carrier family 26 member 10 [Source:HGNC Symbol;Acc:HGNC:14470]	12	57619527	57626151	1
ENSG00000165238	-4.37865	-0.143002	-15.3925	5.13e-13	5.55e-12	19.7518	65268	WNK2	WNK lysine deficient protein kinase 2 [Source:HGNC Symbol;Acc:HGNC:14542]	9	93184916	93320572	1
ENSG00000174606	0.615655	6.11898	15.9498	2.55e-13	2.97e-12	19.7464	90806	ANGEL2	angel homolog 2 [Source:HGNC Symbol;Acc:HGNC:30534]	1	212992182	213015826	-1
ENSG00000236051	0.815461	4.7069	15.7692	3.19e-13	3.62e-12	19.7333	100874212	MYCBP2-AS1	MYCBP2 antisense RNA 1 [Source:HGNC Symbol;Acc:HGNC:41023]	13	77026767	77129717	1
ENSG00000128039	-0.926069	4.09458	-15.6337	3.78e-13	4.21e-12	19.7316	79644	SRD5A3	steroid 5 alpha-reductase 3 [Source:HGNC Symbol;Acc:HGNC:25812]	4	55346109	55373096	1
ENSG00000137441	-4.55995	-0.477004	-15.3966	5.11e-13	5.53e-12	19.7266	83888	FGFBP2	fibroblast growth factor binding protein 2 [Source:HGNC Symbol;Acc:HGNC:29451]	4	15960243	15969309	-1
ENSG00000232021	-1.52132	3.48693	-15.491	4.53e-13	4.95e-12	19.7179	641518	LEF1-AS1	LEF1 antisense RNA 1 [Source:HGNC Symbol;Acc:HGNC:40339]	4	108167525	108256836	1
ENSG00000258441	0.700676	6.3724	15.9457	2.56e-13	2.99e-12	19.7173	283624	LINC00641	long intergenic non-protein coding RNA 641 [Source:HGNC Symbol;Acc:HGNC:27511]	14	21200079	21206900	-1
ENSG00000239322	4.18475	-1.13838	15.3341	5.53e-13	5.92e-12	19.7108		ATP6V1B1-AS1	ATP6V1B1 antisense RNA 1 [Source:HGNC Symbol;Acc:HGNC:51118]	2	70941817	70948610	-1
ENSG00000233351	-4.23325	-0.411807	-15.3811	5.21e-13	5.61e-12	19.708		RP1-69D17.3		6	129479615	129481410	-1
ENSG00000182013	-0.715713	6.11538	-15.8973	2.72e-13	3.15e-12	19.6966	55228	PNMAL1	paraneoplastic Ma antigen family like 1 [Source:HGNC Symbol;Acc:HGNC:25578]	19	46466491	46471563	-1
ENSG00000181381	-2.89607	1.78829	-15.194	6.62e-13	6.95e-12	19.6952	91351	DDX60L	DEAD-box helicase 60-like [Source:HGNC Symbol;Acc:HGNC:26429]	4	168356735	168537786	-1
ENSG00000133636	3.71471	0.471611	15.1674	6.85e-13	7.15e-12	19.688	4922	NTS	neurotensin [Source:HGNC Symbol;Acc:HGNC:8038]	12	85874295	85882992	1
ENSG00000256944	-3.02105	0.514805	-15.1815	6.73e-13	7.04e-12	19.6875		RP11-881M11.1		11	60913166	60914052	-1
ENSG00000088899	-1.28728	3.60725	-15.4976	4.49e-13	4.91e-12	19.6849	9762	LZTS3	leucine zipper tumor suppressor family member 3 [Source:HGNC Symbol;Acc:HGNC:30139]	20	3162617	3173592	-1
ENSG00000224717	-5.82785	-1.80097	-15.3865	5.17e-13	5.58e-12	19.683		RP11-576D8.4		1	205455929	205469024	1
ENSG00000160972	-1.07273	4.01316	-15.5755	4.07e-13	4.48e-12	19.6827	84988	PPP1R16A	protein phosphatase 1 regulatory subunit 16A [Source:HGNC Symbol;Acc:HGNC:14941]	8	144477969	144502121	1
ENSG00000119333	-0.802828	5.3525	-15.7877	3.12e-13	3.55e-12	19.6682	89891	WDR34	WD repeat domain 34 [Source:HGNC Symbol;Acc:HGNC:28296]	9	128633661	128656787	-1
ENSG00000051108	-0.877759	4.76722	-15.6946	3.5e-13	3.94e-12	19.6624	9709	HERPUD1	homocysteine inducible ER protein with ubiquitin like domain 1 [Source:HGNC Symbol;Acc:HGNC:13744]	16	56932048	56944863	1
ENSG00000186684	2.1534	1.96794	15.2433	6.21e-13	6.54e-12	19.6519	339761	CYP27C1	cytochrome P450 family 27 subfamily C member 1 [Source:HGNC Symbol;Acc:HGNC:33480]	2	127184120	127220078	-1
ENSG00000092068	-7.59902	1.71211	-15.2555	6.12e-13	6.47e-12	19.6424	23428	SLC7A8	solute carrier family 7 member 8 [Source:HGNC Symbol;Acc:HGNC:11066]	14	23125295	23183674	-1
ENSG00000183853	0.868312	7.30687	15.9352	2.6e-13	3.02e-12	19.6388	55243	KIRREL	kin of IRRE like (Drosophila) [Source:HGNC Symbol;Acc:HGNC:15734]	1	157993273	158100262	1
ENSG00000164741	1.18273	6.42727	15.8765	2.79e-13	3.22e-12	19.6269	10395	DLC1	DLC1 Rho GTPase activating protein [Source:HGNC Symbol;Acc:HGNC:2897]	8	13083361	13604610	-1
ENSG00000234814	2.0407	1.36211	15.1601	6.92e-13	7.21e-12	19.623		SVILP1	supervillin pseudogene 1 [Source:HGNC Symbol;Acc:HGNC:44959]	10	30655489	30717266	1
ENSG00000182919	0.818533	4.81024	15.698	3.49e-13	3.92e-12	19.6202	28970	C11orf54	chromosome 11 open reading frame 54 [Source:HGNC Symbol;Acc:HGNC:30204]	11	93741591	93764749	1
ENSG00000263684	5.0731	-1.38289	15.2472	6.18e-13	6.53e-12	19.6177		RP11-628O18.1		17	11874932	11875828	-1
ENSG00000165694	-2.72973	2.433	-15.192	6.64e-13	6.96e-12	19.6125	90167	FRMD7	FERM domain containing 7 [Source:HGNC Symbol;Acc:HGNC:8079]	X	132076993	132128020	-1
ENSG00000138613	0.889781	4.673	15.6603	3.66e-13	4.08e-12	19.5994	83464	APH1B	aph-1 homolog B, gamma-secretase subunit [Source:HGNC Symbol;Acc:HGNC:24080]	15	63276018	63309126	1
ENSG00000117569	0.654789	6.02952	15.824	2.98e-13	3.42e-12	19.5939	58155	PTBP2	polypyrimidine tract binding protein 2 [Source:HGNC Symbol;Acc:HGNC:17662]	1	96721665	96823738	1
ENSG00000177485	0.574759	6.3048	15.8415	2.92e-13	3.35e-12	19.5886	10009	ZBTB33	zinc finger and BTB domain containing 33 [Source:HGNC Symbol;Acc:HGNC:16682]	X	120250752	120258398	1
ENSG00000162836	0.896098	4.15992	15.5602	4.15e-13	4.56e-12	19.5779	51205	ACP6	acid phosphatase 6, lysophosphatidic [Source:HGNC Symbol;Acc:HGNC:29609]	1	147629652	147670496	-1
ENSG00000067715	-1.3474	3.05925	-15.3206	5.63e-13	6e-12	19.5759	6857	SYT1	synaptotagmin 1 [Source:HGNC Symbol;Acc:HGNC:11509]	12	78863993	79452008	1
ENSG00000179242	-3.55529	1.55662	-15.0752	7.72e-13	7.98e-12	19.5692	1002	CDH4	cadherin 4 [Source:HGNC Symbol;Acc:HGNC:1763]	20	61252426	61940617	1
ENSG00000244462	0.536666	8.42157	15.9199	2.65e-13	3.07e-12	19.5607	10137	RBM12	RNA binding motif protein 12 [Source:HGNC Symbol;Acc:HGNC:9898]	20	35648925	35664956	-1
ENSG00000186007	-5.67943	-0.849	-15.2451	6.2e-13	6.54e-12	19.5515	93273	LEMD1	LEM domain containing 1 [Source:HGNC Symbol;Acc:HGNC:18725]	1	205381378	205457091	-1
ENSG00000173210	4.10869	0.167941	15.0744	7.73e-13	7.98e-12	19.5494	22885	ABLIM3	actin binding LIM protein family member 3 [Source:HGNC Symbol;Acc:HGNC:29132]	5	149141483	149260542	1
ENSG00000129493	0.753028	5.62418	15.7421	3.3e-13	3.73e-12	19.539	25938	HEATR5A	HEAT repeat containing 5A [Source:HGNC Symbol;Acc:HGNC:20276]	14	31291791	31420582	-1
ENSG00000131080	1.2383	4.57827	15.594	3.98e-13	4.39e-12	19.5384	60401	EDA2R	ectodysplasin A2 receptor [Source:HGNC Symbol;Acc:HGNC:17756]	X	66595637	66639298	-1
ENSG00000143797	0.701837	6.06908	15.7779	3.16e-13	3.59e-12	19.53	129642	MBOAT2	membrane bound O-acyltransferase domain containing 2 [Source:HGNC Symbol;Acc:HGNC:25193]	2	8852690	9003813	-1
ENSG00000152620	-0.909922	4.82319	-15.5972	3.96e-13	4.37e-12	19.5254	133686	NADK2	NAD kinase 2, mitochondrial [Source:HGNC Symbol;Acc:HGNC:26404]	5	36192592	36242279	-1
ENSG00000170776	0.556884	7.65681	15.8555	2.87e-13	3.3e-12	19.5172	11214 102465803	AKAP13	A-kinase anchoring protein 13 [Source:HGNC Symbol;Acc:HGNC:371]	15	85380571	85749358	1
ENSG00000135605	-2.89364	0.669452	-15.0357	8.12e-13	8.37e-12	19.5144	7006	TEC	tec protein tyrosine kinase [Source:HGNC Symbol;Acc:HGNC:11719]	4	48135783	48269864	-1
ENSG00000067208	0.657839	5.50388	15.7052	3.46e-13	3.89e-12	19.5079	7813	EVI5	ecotropic viral integration site 5 [Source:HGNC Symbol;Acc:HGNC:3501]	1	92508696	92792404	-1
ENSG00000087088	0.752118	5.93452	15.7455	3.29e-13	3.71e-12	19.5034	581	BAX	BCL2 associated X, apoptosis regulator [Source:HGNC Symbol;Acc:HGNC:959]	19	48954815	48961798	1
ENSG00000100554	-0.807597	6.01937	-15.7351	3.33e-13	3.76e-12	19.5011	51382	ATP6V1D	ATPase H+ transporting V1 subunit D [Source:HGNC Symbol;Acc:HGNC:13527]	14	67294371	67360265	-1
ENSG00000147010	0.695397	5.23398	15.6666	3.63e-13	4.06e-12	19.5009	30011	SH3KBP1	SH3 domain containing kinase binding protein 1 [Source:HGNC Symbol;Acc:HGNC:13867]	X	19533975	19887601	-1
ENSG00000102317	0.634795	8.01066	15.8567	2.86e-13	3.29e-12	19.4997	5935	RBM3	RNA binding motif (RNP1, RRM) protein 3 [Source:HGNC Symbol;Acc:HGNC:9900]	X	48574449	48579066	1
ENSG00000185585	2.61924	1.25054	15.0481	8e-13	8.25e-12	19.4986	169611	OLFML2A	olfactomedin like 2A [Source:HGNC Symbol;Acc:HGNC:27270]	9	124777158	124814885	1
ENSG00000140931	0.675424	6.20735	15.7565	3.24e-13	3.67e-12	19.4878	123920	CMTM3	CKLF like MARVEL transmembrane domain containing 3 [Source:HGNC Symbol;Acc:HGNC:19174]	16	66603874	66613892	1
ENSG00000212172	3.4935	-0.149974	15.0342	8.14e-13	8.38e-12	19.4858		RNU1-149P	RNA, U1 small nuclear 149, pseudogene [Source:HGNC Symbol;Acc:HGNC:48491]	12	22195469	22195629	-1
ENSG00000129250	-0.689944	6.82448	-15.778	3.16e-13	3.59e-12	19.4758	10749	KIF1C	kinesin family member 1C [Source:HGNC Symbol;Acc:HGNC:6317]	17	4997948	5028401	1
ENSG00000205414	-3.97299	0.629808	-15.0284	8.2e-13	8.44e-12	19.4707		RP11-401P9.6		16	50606076	50613684	-1
ENSG00000198795	-0.677467	6.66957	-15.7589	3.23e-13	3.66e-12	19.4629	25925	ZNF521	zinc finger protein 521 [Source:HGNC Symbol;Acc:HGNC:24605]	18	25061926	25352190	-1
ENSG00000165379	-1.5801	2.25996	-15.0964	7.51e-13	7.78e-12	19.4481	145581	LRFN5	leucine rich repeat and fibronectin type III domain containing 5 [Source:HGNC Symbol;Acc:HGNC:20360]	14	41607570	41904549	1
ENSG00000241749	1.96815	1.66461	15.0567	7.91e-13	8.16e-12	19.4471	204010	RPSAP52	ribosomal protein SA pseudogene 52 [Source:HGNC Symbol;Acc:HGNC:35752]	12	65758020	65826997	-1
ENSG00000152990	0.565614	7.14203	15.7771	3.16e-13	3.59e-12	19.4447	166647	ADGRA3	adhesion G protein-coupled receptor A3 [Source:HGNC Symbol;Acc:HGNC:13839]	4	22345071	22516054	-1
ENSG00000092148	0.640546	8.34405	15.8261	2.97e-13	3.41e-12	19.4431	25831	HECTD1	HECT domain E3 ubiquitin protein ligase 1 [Source:HGNC Symbol;Acc:HGNC:20157]	14	31100112	31207804	-1
ENSG00000182809	-1.5228	3.97895	-15.3619	5.34e-13	5.73e-12	19.4393	1397	CRIP2	cysteine rich protein 2 [Source:HGNC Symbol;Acc:HGNC:2361]	14	105472962	105480170	1
ENSG00000143248	-3.64339	4.31493	-15.2659	6.04e-13	6.4e-12	19.4329	8490	RGS5	regulator of G-protein signaling 5 [Source:HGNC Symbol;Acc:HGNC:10001]	1	163111121	163321791	-1
ENSG00000166405	-2.82592	1.19769	-14.9673	8.88e-13	9.08e-12	19.4308	79608	RIC3	RIC3 acetylcholine receptor chaperone [Source:HGNC Symbol;Acc:HGNC:30338]	11	8106093	8169055	-1
ENSG00000182307	0.668557	6.22615	15.7111	3.43e-13	3.86e-12	19.4269	65265	C8orf33	chromosome 8 open reading frame 33 [Source:HGNC Symbol;Acc:HGNC:26104]	8	145052378	145056030	1
ENSG00000232842	1.0279	3.88104	15.3888	5.16e-13	5.57e-12	19.4165		RP5-961K14.1		X	95973328	95974315	-1
ENSG00000197977	1.28229	3.0645	15.2436	6.21e-13	6.54e-12	19.4126	54898	ELOVL2	ELOVL fatty acid elongase 2 [Source:HGNC Symbol;Acc:HGNC:14416]	6	10980759	11044314	-1
ENSG00000090565	0.628653	5.38846	15.6151	3.87e-13	4.29e-12	19.4079	9727	RAB11FIP3	RAB11 family interacting protein 3 [Source:HGNC Symbol;Acc:HGNC:17224]	16	425619	523011	1
ENSG00000182199	-0.563592	7.53917	-15.7578	3.24e-13	3.67e-12	19.403	6472	SHMT2	serine hydroxymethyltransferase 2 [Source:HGNC Symbol;Acc:HGNC:10852]	12	57229327	57234935	1
ENSG00000179403	-1.86044	2.62668	-15.0925	7.55e-13	7.81e-12	19.3942	64856	VWA1	von Willebrand factor A domain containing 1 [Source:HGNC Symbol;Acc:HGNC:30910]	1	1434861	1442882	1
ENSG00000089057	0.616365	5.49831	15.6159	3.87e-13	4.29e-12	19.3921	9962	SLC23A2	solute carrier family 23 member 2 [Source:HGNC Symbol;Acc:HGNC:10973]	20	4852356	5010293	-1
ENSG00000163932	1.07717	3.89025	15.3708	5.28e-13	5.68e-12	19.3914	5580	PRKCD	protein kinase C delta [Source:HGNC Symbol;Acc:HGNC:9399]	3	53156009	53192717	1
ENSG00000184602	0.58401	6.01876	15.662	3.65e-13	4.08e-12	19.3842	8303	SNN	stannin [Source:HGNC Symbol;Acc:HGNC:11149]	16	11668414	11679159	1
ENSG00000166860	0.586564	6.02184	15.6619	3.65e-13	4.08e-12	19.3838	9880	ZBTB39	zinc finger and BTB domain containing 39 [Source:HGNC Symbol;Acc:HGNC:29014]	12	56998834	57006446	-1
ENSG00000179051	0.768319	8.14248	15.7728	3.18e-13	3.61e-12	19.3837	55920	RCC2	regulator of chromosome condensation 2 [Source:HGNC Symbol;Acc:HGNC:30297]	1	17406760	17439724	-1
ENSG00000122592	-1.34367	4.32335	-15.387	5.17e-13	5.58e-12	19.383	3204	HOXA7	homeobox A7 [Source:HGNC Symbol;Acc:HGNC:5108]	7	27153716	27157936	-1
ENSG00000150760	0.543093	7.6293	15.7445	3.29e-13	3.72e-12	19.3748	1793	DOCK1	dedicator of cytokinesis 1 [Source:HGNC Symbol;Acc:HGNC:2987]	10	126905409	127452517	1
ENSG00000166900	1.17946	4.2397	15.4144	4.99e-13	5.42e-12	19.3733	6809	STX3	syntaxin 3 [Source:HGNC Symbol;Acc:HGNC:11438]	11	59755059	59805882	1
ENSG00000198168	0.836556	5.54833	15.6059	3.92e-13	4.33e-12	19.3731	258010	SVIP	small VCP interacting protein [Source:HGNC Symbol;Acc:HGNC:25238]	11	22813799	22830299	-1
ENSG00000108654	0.555849	9.69892	15.8111	3.03e-13	3.47e-12	19.3674	1655 100616387 100616408	DDX5	DEAD-box helicase 5 [Source:HGNC Symbol;Acc:HGNC:2746]	17	64499616	64508199	-1
ENSG00000184164	-0.982368	3.90317	-15.3208	5.63e-13	6e-12	19.367	79174	CRELD2	cysteine rich with EGF like domains 2 [Source:HGNC Symbol;Acc:HGNC:28150]	22	49918167	49927540	1
ENSG00000117036	0.644132	5.68673	15.5995	3.95e-13	4.37e-12	19.3437	2117	ETV3	ETS variant 3 [Source:HGNC Symbol;Acc:HGNC:3492]	1	157121191	157138474	-1
ENSG00000073614	0.522586	7.25509	15.6928	3.51e-13	3.94e-12	19.3285	5927	KDM5A	lysine demethylase 5A [Source:HGNC Symbol;Acc:HGNC:9886]	12	280129	389454	-1
ENSG00000100219	-0.831195	6.13064	-15.6094	3.9e-13	4.32e-12	19.3244	7494	XBP1	X-box binding protein 1 [Source:HGNC Symbol;Acc:HGNC:12801]	22	28794555	28800597	-1
ENSG00000039319	0.722822	7.07148	15.6782	3.58e-13	4.01e-12	19.3199	9765	ZFYVE16	zinc finger FYVE-type containing 16 [Source:HGNC Symbol;Acc:HGNC:20756]	5	80408013	80479350	1
ENSG00000250198	3.88634	-0.775211	14.9783	8.76e-13	8.98e-12	19.3156		RP11-143A12.3		5	8839732	8881525	1
ENSG00000143850	-7.25952	-0.133235	-15.0112	8.39e-13	8.63e-12	19.298	22874	PLEKHA6	pleckstrin homology domain containing A6 [Source:HGNC Symbol;Acc:HGNC:17053]	1	204218851	204377665	-1
ENSG00000077044	-0.942319	5.7933	-15.5509	4.2e-13	4.61e-12	19.2959	8527	DGKD	diacylglycerol kinase delta [Source:HGNC Symbol;Acc:HGNC:2851]	2	233354507	233472104	1
ENSG00000244161	-1.34971	3.24087	-15.1334	7.16e-13	7.45e-12	19.2886	105377105	FLNB-AS1	FLNB antisense RNA 1 [Source:HGNC Symbol;Acc:HGNC:40239]	3	58162547	58170636	-1
ENSG00000283208	0.780843	4.8175	15.4401	4.83e-13	5.25e-12	19.2805		RP11-226E21.4		13	76992078	77129589	1
ENSG00000124762	1.2913	6.66514	15.6198	3.85e-13	4.28e-12	19.2737	1026	CDKN1A	cyclin dependent kinase inhibitor 1A [Source:HGNC Symbol;Acc:HGNC:1784]	6	36676460	36687339	1
ENSG00000116670	-0.651589	5.68993	-15.5258	4.33e-13	4.74e-12	19.2665	10459	MAD2L2	MAD2 mitotic arrest deficient-like 2 (yeast) [Source:HGNC Symbol;Acc:HGNC:6764]	1	11674480	11691650	-1
ENSG00000260029	-3.62478	0.0823927	-14.9035	9.65e-13	9.79e-12	19.2643		RP11-401P9.1		16	50551824	50553940	-1
ENSG00000254377	-2.47229	2.30618	-14.9246	9.39e-13	9.56e-12	19.2625		MIR124-2HG	MIR124-2 host gene [Source:HGNC Symbol;Acc:HGNC:48723]	8	64373328	64383787	1
ENSG00000168890	-0.997673	3.56287	-15.1829	6.72e-13	7.03e-12	19.2617	129303	TMEM150A	transmembrane protein 150A [Source:HGNC Symbol;Acc:HGNC:24677]	2	85598548	85603196	-1
ENSG00000143061	0.534714	6.74579	15.6173	3.86e-13	4.29e-12	19.2616	3321	IGSF3	immunoglobulin superfamily member 3 [Source:HGNC Symbol;Acc:HGNC:5950]	1	116574399	116667755	-1
ENSG00000196700	0.697964	5.65671	15.5233	4.35e-13	4.76e-12	19.2481	57473	ZNF512B	zinc finger protein 512B [Source:HGNC Symbol;Acc:HGNC:29212]	20	63956702	63969865	-1
ENSG00000163597	0.52203	8.30068	15.671	3.61e-13	4.04e-12	19.2438	100507246	SNHG16	small nucleolar RNA host gene 16 [Source:HGNC Symbol;Acc:HGNC:44352]	17	76557766	76565348	1
ENSG00000168621	3.80217	0.205395	14.8279	1.07e-12	1.07e-11	19.2424	2668	GDNF	glial cell derived neurotrophic factor [Source:HGNC Symbol;Acc:HGNC:4232]	5	37812677	37839686	-1
ENSG00000172461	-1.61155	2.29052	-14.9417	9.18e-13	9.37e-12	19.2387	10690	FUT9	fucosyltransferase 9 [Source:HGNC Symbol;Acc:HGNC:4020]	6	96015984	96215612	1
ENSG00000044090	-0.621848	6.29522	-15.5615	4.14e-13	4.56e-12	19.2378	9820	CUL7	cullin 7 [Source:HGNC Symbol;Acc:HGNC:21024]	6	43037617	43053945	-1
ENSG00000158555	-1.99889	1.94152	-14.8784	9.98e-13	1.01e-11	19.2275	81544	GDPD5	glycerophosphodiester phosphodiesterase domain containing 5 [Source:HGNC Symbol;Acc:HGNC:28804]	11	75434640	75525903	-1
ENSG00000152642	0.924608	4.455	15.3398	5.49e-13	5.88e-12	19.2236	23171	GPD1L	glycerol-3-phosphate dehydrogenase 1-like [Source:HGNC Symbol;Acc:HGNC:28956]	3	32105689	32168713	1
ENSG00000082458	0.578755	5.96794	15.5274	4.33e-13	4.74e-12	19.2135	1741	DLG3	discs large MAGUK scaffold protein 3 [Source:HGNC Symbol;Acc:HGNC:2902]	X	70444861	70505490	1
ENSG00000138767	0.840009	4.65395	15.3639	5.32e-13	5.72e-12	19.2131	246175	CNOT6L	CCR4-NOT transcription complex subunit 6 like [Source:HGNC Symbol;Acc:HGNC:18042]	4	77713387	77819615	-1
ENSG00000104321	-3.37817	0.21749	-14.8306	1.06e-12	1.07e-11	19.2031	8989	TRPA1	transient receptor potential cation channel subfamily A member 1 [Source:HGNC Symbol;Acc:HGNC:497]	8	72019917	72075617	-1
ENSG00000067057	-0.956279	4.60124	-15.3147	5.67e-13	6.03e-12	19.2024	5214	PFKP	phosphofructokinase, platelet [Source:HGNC Symbol;Acc:HGNC:8878]	10	3066333	3137712	1
ENSG00000198865	-5.72158	0.367711	-14.9321	9.3e-13	9.48e-12	19.1999	100129792	CCDC152	coiled-coil domain containing 152 [Source:HGNC Symbol;Acc:HGNC:34438]	5	42756801	42802360	1
ENSG00000082556	-4.10549	0.965316	-14.797	1.11e-12	1.11e-11	19.1983	4986	OPRK1	opioid receptor kappa 1 [Source:HGNC Symbol;Acc:HGNC:8154]	8	53225716	53251697	-1
ENSG00000072195	-2.39694	1.60292	-14.8128	1.09e-12	1.09e-11	19.195	10290 100996693	SPEG	SPEG complex locus [Source:HGNC Symbol;Acc:HGNC:16901]	2	219434846	219498287	1
ENSG00000187079	0.55061	7.37231	15.5815	4.04e-13	4.46e-12	19.176	7003	TEAD1	TEA domain transcription factor 1 [Source:HGNC Symbol;Acc:HGNC:11714]	11	12674591	12944483	1
ENSG00000261065	1.54616	1.64679	14.8558	1.03e-12	1.04e-11	19.1745		RP11-74C13.4		1	204131062	204131966	1
ENSG00000150995	-1.27152	3.95898	-15.1723	6.81e-13	7.12e-12	19.1744	3708	ITPR1	inositol 1,4,5-trisphosphate receptor type 1 [Source:HGNC Symbol;Acc:HGNC:6180]	3	4493348	4847840	1
ENSG00000151726	0.780226	4.23295	15.2623	6.06e-13	6.43e-12	19.1675	2180	ACSL1	acyl-CoA synthetase long-chain family member 1 [Source:HGNC Symbol;Acc:HGNC:3569]	4	184755595	184826818	-1
ENSG00000272729	-5.4756	-0.636766	-14.9152	9.51e-13	9.66e-12	19.1571		RP11-387A1.5		2	176164164	176165716	-1
ENSG00000104299	0.826576	5.04365	15.3696	5.29e-13	5.68e-12	19.1448	55756	INTS9	integrator complex subunit 9 [Source:HGNC Symbol;Acc:HGNC:25592]	8	28767661	28890242	-1
ENSG00000196839	-1.77148	2.64294	-14.9049	9.64e-13	9.77e-12	19.1348	100	ADA	adenosine deaminase [Source:HGNC Symbol;Acc:HGNC:186]	20	44619522	44652233	-1
ENSG00000176771	-4.21312	2.9951	-14.8181	1.08e-12	1.08e-11	19.1326	344148	NCKAP5	NCK associated protein 5 [Source:HGNC Symbol;Acc:HGNC:29847]	2	132671799	133568463	-1
ENSG00000111859	-1.04517	5.01836	-15.3221	5.62e-13	5.99e-12	19.1313	4739	NEDD9	neural precursor cell expressed, developmentally down-regulated 9 [Source:HGNC Symbol;Acc:HGNC:7733]	6	11183298	11382348	-1
ENSG00000167617	-2.66279	1.77568	-14.7661	1.16e-12	1.15e-11	19.1257	148170	CDC42EP5	CDC42 effector protein 5 [Source:HGNC Symbol;Acc:HGNC:17408]	19	54465026	54473264	-1
ENSG00000110697	-0.787682	5.06266	-15.3316	5.55e-13	5.93e-12	19.1218	9600	PITPNM1	phosphatidylinositol transfer protein membrane associated 1 [Source:HGNC Symbol;Acc:HGNC:9003]	11	67491768	67506263	-1
ENSG00000025039	-2.26337	2.88161	-14.8994	9.71e-13	9.83e-12	19.1159	58528	RRAGD	Ras related GTP binding D [Source:HGNC Symbol;Acc:HGNC:19903]	6	89364636	89412270	-1
ENSG00000129596	-0.840185	4.8532	-15.2935	5.83e-13	6.19e-12	19.115	1036	CDO1	cysteine dioxygenase type 1 [Source:HGNC Symbol;Acc:HGNC:1795]	5	115804733	115816954	-1
ENSG00000162384	0.681425	5.10352	15.3526	5.4e-13	5.79e-12	19.1105	54987	C1orf123	chromosome 1 open reading frame 123 [Source:HGNC Symbol;Acc:HGNC:26059]	1	53214099	53220617	-1
ENSG00000056998	0.691917	5.4325	15.3901	5.15e-13	5.56e-12	19.1052	8908	GYG2	glycogenin 2 [Source:HGNC Symbol;Acc:HGNC:4700]	X	2828788	2882818	1
ENSG00000186439	3.31633	-0.0973942	14.729	1.21e-12	1.2e-11	19.1039	10345	TRDN	triadin [Source:HGNC Symbol;Acc:HGNC:12261]	6	123216339	123637093	-1
ENSG00000106976	-0.823338	5.07963	-15.3134	5.68e-13	6.04e-12	19.0961	1759	DNM1	dynamin 1 [Source:HGNC Symbol;Acc:HGNC:2972]	9	128191655	128255248	1
ENSG00000105514	-0.83689	4.4806	-15.2179	6.42e-13	6.75e-12	19.0929	9545	RAB3D	RAB3D, member RAS oncogene family [Source:HGNC Symbol;Acc:HGNC:9779]	19	11322046	11346270	-1
ENSG00000079841	-3.546	0.579245	-14.7198	1.23e-12	1.22e-11	19.089	22999	RIMS1	regulating synaptic membrane exocytosis 1 [Source:HGNC Symbol;Acc:HGNC:17282]	6	71886703	72403143	1
ENSG00000272573	-2.03237	3.42405	-14.9748	8.8e-13	9e-12	19.0857	389125	MUSTN1	musculoskeletal, embryonic nuclear protein 1 [Source:HGNC Symbol;Acc:HGNC:22144]	3	52833114	52835219	-1
ENSG00000152952	-0.718712	5.67924	-15.3835	5.19e-13	5.6e-12	19.0826	5352	PLOD2	procollagen-lysine,2-oxoglutarate 5-dioxygenase 2 [Source:HGNC Symbol;Acc:HGNC:9082]	3	146069440	146163653	-1
ENSG00000169184	-3.03511	1.4068	-14.7026	1.26e-12	1.24e-11	19.0792	4330	MN1	MN1 proto-oncogene, transcriptional regulator [Source:HGNC Symbol;Acc:HGNC:7180]	22	27748277	27801498	-1
ENSG00000170500	-2.14839	2.34515	-14.804	1.1e-12	1.1e-11	19.0753	164832	LONRF2	LON peptidase N-terminal domain and ring finger 2 [Source:HGNC Symbol;Acc:HGNC:24788]	2	100273291	100322733	-1
ENSG00000149557	0.785019	5.87708	15.4064	5.04e-13	5.47e-12	19.0657	9638	FEZ1	fasciculation and elongation protein zeta 1 [Source:HGNC Symbol;Acc:HGNC:3659]	11	125445745	125496317	-1
ENSG00000125845	-5.80066	-0.310764	-14.8291	1.06e-12	1.07e-11	19.0624	650	BMP2	bone morphogenetic protein 2 [Source:HGNC Symbol;Acc:HGNC:1069]	20	6767664	6780280	1
ENSG00000145864	-4.67468	0.0673876	-14.8033	1.1e-12	1.1e-11	19.0544	2561	GABRB2	gamma-aminobutyric acid type A receptor beta2 subunit [Source:HGNC Symbol;Acc:HGNC:4082]	5	161288429	161549044	-1
ENSG00000110693	0.859842	5.86775	15.3898	5.15e-13	5.56e-12	19.0455	55553 102464826	SOX6	SRY-box 6 [Source:HGNC Symbol;Acc:HGNC:16421]	11	15966449	16739591	-1
ENSG00000164879	-3.45189	0.327364	-14.695	1.27e-12	1.25e-11	19.0391	761	CA3	carbonic anhydrase 3 [Source:HGNC Symbol;Acc:HGNC:1374]	8	85373436	85449040	1
ENSG00000111906	0.628533	6.62446	15.4408	4.83e-13	5.25e-12	19.0381	51020	HDDC2	HD domain containing 2 [Source:HGNC Symbol;Acc:HGNC:21078]	6	125219962	125302078	-1
ENSG00000096433	0.969976	4.45893	15.1982	6.58e-13	6.91e-12	19.0349	3710	ITPR3	inositol 1,4,5-trisphosphate receptor type 3 [Source:HGNC Symbol;Acc:HGNC:6182]	6	33620365	33696574	1
ENSG00000175662	1.00173	4.04685	15.13	7.19e-13	7.48e-12	19.0348	146691	TOM1L2	target of myb1 like 2 membrane trafficking protein [Source:HGNC Symbol;Acc:HGNC:11984]	17	17843511	17972422	-1
ENSG00000162374	6.04422	-0.317304	14.7371	1.2e-12	1.19e-11	19.03	1996	ELAVL4	ELAV like neuron-specific RNA binding protein 4 [Source:HGNC Symbol;Acc:HGNC:3315]	1	50048014	50203786	1
ENSG00000183386	-1.0702	3.41932	-14.9777	8.76e-13	8.98e-12	19.0235	2275	FHL3	four and a half LIM domains 3 [Source:HGNC Symbol;Acc:HGNC:3704]	1	37996770	38005606	-1
ENSG00000043093	0.697934	5.6228	15.3446	5.46e-13	5.85e-12	19.0166	54165	DCUN1D1	defective in cullin neddylation 1 domain containing 1 [Source:HGNC Symbol;Acc:HGNC:18184]	3	182938074	182985953	-1
ENSG00000110218	0.620439	6.35094	15.4016	5.07e-13	5.5e-12	19.0087	24145	PANX1	pannexin 1 [Source:HGNC Symbol;Acc:HGNC:8599]	11	94128928	94181972	1
ENSG00000129422	-1.69455	2.0449	-14.7338	1.21e-12	1.2e-11	19.0042	57509	MTUS1	microtubule associated tumor suppressor 1 [Source:HGNC Symbol;Acc:HGNC:29789]	8	17643795	17800917	-1
ENSG00000271601	-0.645235	5.11889	-15.256	6.11e-13	6.47e-12	19.0042	128077	LIX1L	limb and CNS expressed 1 like [Source:HGNC Symbol;Acc:HGNC:28715]	1	145933423	145958001	-1
ENSG00000065809	0.657715	6.16402	15.3754	5.25e-13	5.65e-12	18.9918	83641	FAM107B	family with sequence similarity 107 member B [Source:HGNC Symbol;Acc:HGNC:23726]	10	14518557	14774897	-1
ENSG00000149948	0.933782	8.43157	15.4825	4.58e-13	5e-12	18.9892	8091	HMGA2	high mobility group AT-hook 2 [Source:HGNC Symbol;Acc:HGNC:5009]	12	65824131	65966295	1
ENSG00000125505	-0.875701	4.6381	-15.164	6.88e-13	7.18e-12	18.9891	79143	MBOAT7	membrane bound O-acyltransferase domain containing 7 [Source:HGNC Symbol;Acc:HGNC:15505]	19	54173412	54189882	-1
ENSG00000259006	1.69039	1.58274	14.707	1.25e-12	1.24e-11	18.9867		RP11-566K11.4		16	89919827	89922662	-1
ENSG00000238105	-2.71705	1.1225	-14.6251	1.39e-12	1.36e-11	18.9823	55592	GOLGA2P5	golgin A2 pseudogene 5 [Source:HGNC Symbol;Acc:HGNC:25315]	12	100156357	100173659	-1
ENSG00000115652	-0.670244	4.68656	-15.1678	6.85e-13	7.15e-12	18.9735	80146	UXS1	UDP-glucuronate decarboxylase 1 [Source:HGNC Symbol;Acc:HGNC:17729]	2	106093303	106194339	-1
ENSG00000177614	-1.7791	2.09335	-14.7117	1.24e-12	1.23e-11	18.9711	79605	PGBD5	piggyBac transposable element derived 5 [Source:HGNC Symbol;Acc:HGNC:19405]	1	230314482	230426371	-1
ENSG00000118640	-3.28661	1.14894	-14.6063	1.43e-12	1.4e-11	18.9615	8673	VAMP8	vesicle associated membrane protein 8 [Source:HGNC Symbol;Acc:HGNC:12647]	2	85561562	85582031	1
ENSG00000151474	0.725501	5.93836	15.3265	5.59e-13	5.97e-12	18.9518	55691	FRMD4A	FERM domain containing 4A [Source:HGNC Symbol;Acc:HGNC:25491]	10	13643706	14462142	-1
ENSG00000254454	0.828063	5.25048	15.25	6.16e-13	6.51e-12	18.9494		RCC2P6	regulator of chromosome condensation 2 pseudogene 6 [Source:HGNC Symbol;Acc:HGNC:42382]	11	62371146	62373168	1
ENSG00000064300	0.840864	8.02644	15.4353	4.86e-13	5.28e-12	18.9471	4804	NGFR	nerve growth factor receptor [Source:HGNC Symbol;Acc:HGNC:7809]	17	49495293	49515017	1
ENSG00000260122	-2.75101	1.30898	-14.6036	1.43e-12	1.4e-11	18.9466		RP11-923I11.3		12	51809705	51810600	-1
ENSG00000168769	0.637793	6.12937	15.3361	5.52e-13	5.9e-12	18.9431	54790	TET2	tet methylcytosine dioxygenase 2 [Source:HGNC Symbol;Acc:HGNC:25941]	4	105145875	105279816	1
ENSG00000175215	-0.668846	6.78116	-15.366	5.31e-13	5.71e-12	18.9379	10106	CTDSP2	CTD small phosphatase 2 [Source:HGNC Symbol;Acc:HGNC:17077]	12	57819927	57846739	-1
ENSG00000227279	1.07996	3.5936	14.9709	8.84e-13	9.04e-12	18.9249		AC015933.2		18	27954519	27963687	1
ENSG00000102471	0.633115	5.44434	15.2543	6.13e-13	6.48e-12	18.9225	54602	NDFIP2	Nedd4 family interacting protein 2 [Source:HGNC Symbol;Acc:HGNC:18537]	13	79481124	79556075	1
ENSG00000165138	-0.659892	5.40841	-15.2305	6.32e-13	6.65e-12	18.9196	203286	ANKS6	ankyrin repeat and sterile alpha motif domain containing 6 [Source:HGNC Symbol;Acc:HGNC:26724]	9	98731329	98796965	-1
ENSG00000185989	0.631275	5.95306	15.301	5.77e-13	6.13e-12	18.9157	22821	RASA3	RAS p21 protein activator 3 [Source:HGNC Symbol;Acc:HGNC:20331]	13	113977783	114132611	-1
ENSG00000015475	1.04496	4.92007	15.1685	6.84e-13	7.15e-12	18.903	637	BID	BH3 interacting domain death agonist [Source:HGNC Symbol;Acc:HGNC:1050]	22	17734138	17774770	-1
ENSG00000173559	1.31575	3.42367	14.9175	9.48e-13	9.64e-12	18.8961	64859	NABP1	nucleic acid binding protein 1 [Source:HGNC Symbol;Acc:HGNC:26232]	2	191678068	191696659	1
ENSG00000140265	0.573127	6.329	15.3147	5.67e-13	6.03e-12	18.8952	146050	ZSCAN29	zinc finger and SCAN domain containing 29 [Source:HGNC Symbol;Acc:HGNC:26673]	15	43358172	43371025	-1
ENSG00000274441	-5.45903	-1.21227	-14.7075	1.25e-12	1.24e-11	18.8844		CTD-2282P23.2		5	36636019	36649347	-1
ENSG00000155897	-6.23873	-1.72403	-14.7054	1.25e-12	1.24e-11	18.8759	114	ADCY8	adenylate cyclase 8 [Source:HGNC Symbol;Acc:HGNC:239]	8	130780301	131042426	-1
ENSG00000104219	0.779154	5.36119	15.2027	6.55e-13	6.88e-12	18.8676	51201	ZDHHC2	zinc finger DHHC-type containing 2 [Source:HGNC Symbol;Acc:HGNC:18469]	8	17156029	17224799	1
ENSG00000176749	-0.930508	5.42808	-15.1781	6.76e-13	7.07e-12	18.8579	8851	CDK5R1	cyclin dependent kinase 5 regulatory subunit 1 [Source:HGNC Symbol;Acc:HGNC:1775]	17	32486619	32491256	1
ENSG00000138639	-2.1731	1.64235	-14.5653	1.51e-12	1.47e-11	18.8516	83478	ARHGAP24	Rho GTPase activating protein 24 [Source:HGNC Symbol;Acc:HGNC:25361]	4	85475114	86002670	1
ENSG00000152133	0.768471	4.87862	15.1257	7.23e-13	7.51e-12	18.85	253635	GPATCH11	G-patch domain containing 11 [Source:HGNC Symbol;Acc:HGNC:26768]	2	37084451	37099244	1
ENSG00000272657	-1.04443	3.73949	-14.8976	9.73e-13	9.85e-12	18.8411		AP000320.7		21	34073592	34360033	1
ENSG00000166886	-0.960382	6.1695	-15.2435	6.21e-13	6.54e-12	18.8405	4665	NAB2	NGFI-A binding protein 2 [Source:HGNC Symbol;Acc:HGNC:7627]	12	57088894	57095476	1
ENSG00000164620	-1.40724	2.56072	-14.6917	1.28e-12	1.26e-11	18.8402	285613	RELL2	RELT like 2 [Source:HGNC Symbol;Acc:HGNC:26902]	5	141636950	141641077	1
ENSG00000026559	-2.26578	1.53295	-14.5445	1.55e-12	1.51e-11	18.8377	3755	KCNG1	potassium voltage-gated channel modifier subfamily G member 1 [Source:HGNC Symbol;Acc:HGNC:6248]	20	51003656	51023129	-1
ENSG00000104812	-0.703008	4.79636	-15.0749	7.72e-13	7.98e-12	18.8275	2997	GYS1	glycogen synthase 1 [Source:HGNC Symbol;Acc:HGNC:4706]	19	48968125	48993310	-1
ENSG00000154153	2.62818	1.16218	14.5367	1.57e-12	1.52e-11	18.8273	54463	FAM134B	family with sequence similarity 134 member B [Source:HGNC Symbol;Acc:HGNC:25964]	5	16473038	16617058	-1
ENSG00000138614	0.530528	5.92061	15.2245	6.37e-13	6.7e-12	18.8173	81556	VWA9	von Willebrand factor A domain containing 9 [Source:HGNC Symbol;Acc:HGNC:25372]	15	65578753	65611289	-1
ENSG00000105854	-0.619901	6.56768	-15.2591	6.09e-13	6.45e-12	18.8119	5445	PON2	paraoxonase 2 [Source:HGNC Symbol;Acc:HGNC:9205]	7	95404863	95435329	-1
ENSG00000253961	1.63348	1.95389	14.6041	1.43e-12	1.4e-11	18.7864		RP11-363L24.3		8	31167078	31177167	-1
ENSG00000197119	0.652189	5.58943	15.1678	6.85e-13	7.15e-12	18.7851	123096	SLC25A29	solute carrier family 25 member 29 [Source:HGNC Symbol;Acc:HGNC:20116]	14	100291111	100306547	-1
ENSG00000113916	1.62093	3.26784	14.7986	1.11e-12	1.11e-11	18.7782	604	BCL6	B-cell CLL/lymphoma 6 [Source:HGNC Symbol;Acc:HGNC:1001]	3	187721377	187745727	-1
ENSG00000159184	-2.18651	1.86843	-14.5291	1.58e-12	1.54e-11	18.777	10481	HOXB13	homeobox B13 [Source:HGNC Symbol;Acc:HGNC:5112]	17	48724763	48729178	-1
ENSG00000279645	2.42956	0.883022	14.4847	1.68e-12	1.62e-11	18.7768		RP11-759A24.1		15	96285068	96289265	-1
ENSG00000118217	0.588286	5.88172	15.1877	6.67e-13	6.99e-12	18.7727	22926	ATF6	activating transcription factor 6 [Source:HGNC Symbol;Acc:HGNC:791]	1	161766294	161964070	1
ENSG00000241852	-0.871544	4.32969	-14.9516	9.07e-13	9.25e-12	18.7703	541565	C8orf58	chromosome 8 open reading frame 58 [Source:HGNC Symbol;Acc:HGNC:32233]	8	22599601	22604150	1
ENSG00000136231	0.523419	7.44858	15.2769	5.95e-13	6.32e-12	18.7688	10643	IGF2BP3	insulin like growth factor 2 mRNA binding protein 3 [Source:HGNC Symbol;Acc:HGNC:28868]	7	23310209	23470467	-1
ENSG00000147459	0.995449	4.35905	14.9771	8.77e-13	8.98e-12	18.7595	80005	DOCK5	dedicator of cytokinesis 5 [Source:HGNC Symbol;Acc:HGNC:23476]	8	25184723	25418082	1
ENSG00000160408	-0.802923	4.64183	-14.995	8.57e-13	8.79e-12	18.757	30815	ST6GALNAC6	ST6 N-acetylgalactosaminide alpha-2,6-sialyltransferase 6 [Source:HGNC Symbol;Acc:HGNC:23364]	9	127885321	127905408	-1
ENSG00000253293	-0.784395	5.74042	-15.1401	7.1e-13	7.39e-12	18.7514	3206	HOXA10	homeobox A10 [Source:HGNC Symbol;Acc:HGNC:5100]	7	27170591	27180261	-1
ENSG00000148120	0.813414	4.14497	14.9317	9.3e-13	9.48e-12	18.7435	84909 407012	C9orf3	chromosome 9 open reading frame 3 [Source:HGNC Symbol;Acc:HGNC:1361]	9	94726701	95087218	1
ENSG00000189337	-1.80058	1.91369	-14.5089	1.63e-12	1.58e-11	18.7247	23254	KAZN	kazrin, periplakin interacting protein [Source:HGNC Symbol;Acc:HGNC:29173]	1	13892792	15118043	1
ENSG00000154548	0.843502	4.52731	14.9778	8.76e-13	8.98e-12	18.7225	135295	SRSF12	serine and arginine rich splicing factor 12 [Source:HGNC Symbol;Acc:HGNC:21220]	6	89095959	89118081	-1
ENSG00000259583	4.40895	-0.219724	14.4617	1.73e-12	1.67e-11	18.7214	101927751	RP11-66B24.4		15	100892859	100919283	-1
ENSG00000164989	0.990867	4.18253	14.9147	9.51e-13	9.67e-12	18.7138	203238	CCDC171	coiled-coil domain containing 171 [Source:HGNC Symbol;Acc:HGNC:29828]	9	15552897	16061663	1
ENSG00000138641	0.586514	6.07883	15.1476	7.03e-13	7.32e-12	18.6963	8916	HERC3	HECT and RLD domain containing E3 ubiquitin protein ligase 3 [Source:HGNC Symbol;Acc:HGNC:4876]	4	88521048	88708542	1
ENSG00000121864	0.588864	5.74762	15.1135	7.35e-13	7.62e-12	18.6901	51193	ZNF639	zinc finger protein 639 [Source:HGNC Symbol;Acc:HGNC:30950]	3	179322991	179338583	1
ENSG00000164609	0.674719	5.10644	15.0343	8.14e-13	8.38e-12	18.6838	10569	SLU7	SLU7 homolog, splicing factor [Source:HGNC Symbol;Acc:HGNC:16939]	5	160401641	160421711	-1
ENSG00000128045	-4.86703	3.58421	-14.5078	1.63e-12	1.58e-11	18.6727	65997	RASL11B	RAS like family 11 member B [Source:HGNC Symbol;Acc:HGNC:23804]	4	52862290	52866835	1
ENSG00000180867	-0.538843	7.79003	-15.2128	6.46e-13	6.79e-12	18.6699		PDIA3P1	protein disulfide isomerase family A member 3 pseudogene 1 [Source:HGNC Symbol;Acc:HGNC:4607]	1	147178113	147179622	1
ENSG00000163093	0.933572	3.37997	14.7351	1.2e-12	1.2e-11	18.652	129880	BBS5	Bardet-Biedl syndrome 5 [Source:HGNC Symbol;Acc:HGNC:970]	2	169479178	169506655	1
ENSG00000153253	-3.61321	0.520106	-14.3882	1.91e-12	1.82e-11	18.6509	6328	SCN3A	sodium voltage-gated channel alpha subunit 3 [Source:HGNC Symbol;Acc:HGNC:10590]	2	165087522	165204067	-1
ENSG00000029534	-6.12947	-0.573426	-14.4985	1.65e-12	1.6e-11	18.6492	286	ANK1	ankyrin 1 [Source:HGNC Symbol;Acc:HGNC:492]	8	41653220	41896762	-1
ENSG00000110042	-1.59488	4.87047	-14.9018	9.68e-13	9.8e-12	18.6327	23220	DTX4	deltex E3 ubiquitin ligase 4 [Source:HGNC Symbol;Acc:HGNC:29151]	11	59171430	59208587	1
ENSG00000011478	-0.99547	4.15889	-14.8165	1.08e-12	1.08e-11	18.6324	54814	QPCTL	glutaminyl-peptide cyclotransferase like [Source:HGNC Symbol;Acc:HGNC:25952]	19	45692483	45703989	1
ENSG00000173960	0.542021	6.45582	15.1223	7.26e-13	7.54e-12	18.6267	165324	UBXN2A	UBX domain protein 2A [Source:HGNC Symbol;Acc:HGNC:27265]	2	23927285	24004909	1
ENSG00000250619	-4.8096	0.640194	-14.3944	1.9e-12	1.81e-11	18.6213		CTD-2215L10.1		5	9001774	9045940	1
ENSG00000154146	-1.57556	2.55273	-14.5212	1.6e-12	1.55e-11	18.6195	4900	NRGN	neurogranin [Source:HGNC Symbol;Acc:HGNC:8000]	11	124739846	124747210	1
ENSG00000171533	-2.57992	1.7651	-14.3917	1.91e-12	1.81e-11	18.619	4135	MAP6	microtubule associated protein 6 [Source:HGNC Symbol;Acc:HGNC:6868]	11	75586918	75669120	-1
ENSG00000112539	-5.30832	-1.61284	-14.5043	1.64e-12	1.58e-11	18.6138	168090	C6orf118	chromosome 6 open reading frame 118 [Source:HGNC Symbol;Acc:HGNC:21233]	6	165279664	165309607	-1
ENSG00000134030	0.838203	4.51907	14.8693	1.01e-12	1.02e-11	18.577	9811	CTIF	cap binding complex dependent translation initiation factor [Source:HGNC Symbol;Acc:HGNC:23925]	18	48539046	48863217	1
ENSG00000257354	0.99175	3.47792	14.6923	1.27e-12	1.26e-11	18.5714		RP11-631N16.2		12	62602752	62622213	1
ENSG00000146278	1.26947	4.74698	14.8837	9.91e-13	1e-11	18.5571	10957	PNRC1	proline rich nuclear receptor coactivator 1 [Source:HGNC Symbol;Acc:HGNC:17278]	6	89080751	89085160	1
ENSG00000064666	-0.811095	6.89116	-15.0841	7.63e-13	7.89e-12	18.5547	1265	CNN2	calponin 2 [Source:HGNC Symbol;Acc:HGNC:2156]	19	1026581	1039068	1
ENSG00000163872	0.568117	7.1623	15.1047	7.43e-13	7.7e-12	18.5543	55689	YEATS2	YEATS domain containing 2 [Source:HGNC Symbol;Acc:HGNC:25489]	3	183697818	183812625	1
ENSG00000160867	1.0577	3.84537	14.7321	1.21e-12	1.2e-11	18.5422	2264	FGFR4	fibroblast growth factor receptor 4 [Source:HGNC Symbol;Acc:HGNC:3691]	5	177086886	177098144	1
ENSG00000170113	0.80466	4.77109	14.8775	9.99e-13	1.01e-11	18.5358	123606	NIPA1	non imprinted in Prader-Willi/Angelman syndrome 1 [Source:HGNC Symbol;Acc:HGNC:17043]	15	22773063	22829791	1
ENSG00000040731	-3.03911	1.89282	-14.325	2.08e-12	1.97e-11	18.5341	1008	CDH10	cadherin 10 [Source:HGNC Symbol;Acc:HGNC:1749]	5	24487100	24644978	-1
ENSG00000119927	0.649069	6.02154	15.0107	8.39e-13	8.63e-12	18.5183	57678	GPAM	glycerol-3-phosphate acyltransferase, mitochondrial [Source:HGNC Symbol;Acc:HGNC:24865]	10	112149864	112215377	-1
ENSG00000080166	2.77174	0.394789	14.2707	2.24e-12	2.1e-11	18.5134	1638	DCT	dopachrome tautomerase [Source:HGNC Symbol;Acc:HGNC:2709]	13	94436808	94479682	-1
ENSG00000184185	-5.46223	-1.04118	-14.4047	1.87e-12	1.79e-11	18.5123	3768	KCNJ12	potassium voltage-gated channel subfamily J member 12 [Source:HGNC Symbol;Acc:HGNC:6258]	17	21376197	21419872	1
ENSG00000173933	0.560154	7.58571	15.0898	7.57e-13	7.84e-12	18.51	5936	RBM4	RNA binding motif protein 4 [Source:HGNC Symbol;Acc:HGNC:9901]	11	66638617	66666682	1
ENSG00000256994	-5.94726	-0.47824	-14.3858	1.92e-12	1.83e-11	18.5072		RP11-871F6.3		12	17509353	17589992	-1
ENSG00000180509	2.87855	-0.0255909	14.2644	2.26e-12	2.12e-11	18.5023	3753	KCNE1	potassium voltage-gated channel subfamily E regulatory subunit 1 [Source:HGNC Symbol;Acc:HGNC:6240]	21	34446688	34512275	-1
ENSG00000155256	0.749923	4.5334	14.8119	1.09e-12	1.09e-11	18.495	118813	ZFYVE27	zinc finger FYVE-type containing 27 [Source:HGNC Symbol;Acc:HGNC:26559]	10	97737121	97760907	1
ENSG00000279400	-5.47087	0.990098	-14.2898	2.19e-12	2.05e-11	18.489		CTD-2353F22.2		5	36667717	36669958	1
ENSG00000182504	0.691151	6.25413	15.0026	8.48e-13	8.72e-12	18.4834	79598	CEP97	centrosomal protein 97 [Source:HGNC Symbol;Acc:HGNC:26244]	3	101723925	101770562	1
ENSG00000122971	2.24974	1.37152	14.3047	2.14e-12	2.02e-11	18.4798	35	ACADS	acyl-CoA dehydrogenase, C-2 to C-3 short chain [Source:HGNC Symbol;Acc:HGNC:90]	12	120725735	120740008	1
ENSG00000189362	0.964537	3.24853	14.5865	1.47e-12	1.43e-11	18.4787	100131211	NEMP2	nuclear envelope integral membrane protein 2 [Source:HGNC Symbol;Acc:HGNC:33700]	2	190504342	190534722	-1
ENSG00000172986	-1.40574	3.2774	-14.5381	1.57e-12	1.52e-11	18.4768	727936	GXYLT2	glucoside xylosyltransferase 2 [Source:HGNC Symbol;Acc:HGNC:33383]	3	72888073	72998138	1
ENSG00000074527	-6.27394	-0.357747	-14.3565	2e-12	1.89e-11	18.4745	59277	NTN4	netrin 4 [Source:HGNC Symbol;Acc:HGNC:13658]	12	95657807	95791152	-1
ENSG00000180340	-0.97667	5.59698	-14.9102	9.57e-13	9.71e-12	18.4707	2535	FZD2	frizzled class receptor 2 [Source:HGNC Symbol;Acc:HGNC:4040]	17	44557459	44559570	1
ENSG00000128242	1.60773	2.62979	14.4683	1.72e-12	1.66e-11	18.4663	9514	GAL3ST1	galactose-3-O-sulfotransferase 1 [Source:HGNC Symbol;Acc:HGNC:24240]	22	30554635	30574587	-1
ENSG00000269416	-1.22589	3.34367	-14.5472	1.55e-12	1.5e-11	18.4638	104472717	LINC01224	long intergenic non-protein coding RNA 1224 [Source:HGNC Symbol;Acc:HGNC:49676]	19	23399233	23416075	-1
ENSG00000078967	1.11423	3.2567	14.5741	1.49e-12	1.45e-11	18.4617	51619	UBE2D4	ubiquitin conjugating enzyme E2 D4 (putative) [Source:HGNC Symbol;Acc:HGNC:21647]	7	43926438	43956136	1
ENSG00000152932	-1.90263	1.70557	-14.2915	2.18e-12	2.05e-11	18.46	115827	RAB3C	RAB3C, member RAS oncogene family [Source:HGNC Symbol;Acc:HGNC:30269]	5	58582221	58859394	1
ENSG00000196205	0.588992	10.2143	15.1277	7.21e-13	7.49e-12	18.4465		EEF1A1P5	eukaryotic translation elongation factor 1 alpha 1 pseudogene 5 [Source:HGNC Symbol;Acc:HGNC:3200]	9	133019486	133020874	1
ENSG00000158864	0.55258	6.69986	15.0012	8.5e-13	8.73e-12	18.4443	4720	NDUFS2	NADH:ubiquinone oxidoreductase core subunit S2 [Source:HGNC Symbol;Acc:HGNC:7708]	1	161197104	161214395	1
ENSG00000148541	-2.65976	0.715879	-14.2181	2.41e-12	2.24e-11	18.4442	220965	FAM13C	family with sequence similarity 13 member C [Source:HGNC Symbol;Acc:HGNC:19371]	10	59246129	59363181	-1
ENSG00000128567	-2.50408	2.69421	-14.3668	1.97e-12	1.87e-11	18.4414	5420	PODXL	podocalyxin like [Source:HGNC Symbol;Acc:HGNC:9171]	7	131500262	131558217	-1
ENSG00000149474	0.586211	5.77581	14.9312	9.31e-13	9.48e-12	18.4401	57325	KAT14	lysine acetyltransferase 14 [Source:HGNC Symbol;Acc:HGNC:15904]	20	18138118	18188387	1
ENSG00000101452	0.635794	5.01559	14.8309	1.06e-12	1.07e-11	18.424	60625	DHX35	DEAH-box helicase 35 [Source:HGNC Symbol;Acc:HGNC:15861]	20	38962299	39039723	1
ENSG00000255794	-9.39757	1.20272	-14.2935	2.18e-12	2.04e-11	18.414	196475	RMST	rhabdomyosarcoma 2 associated transcript (non-protein coding) [Source:HGNC Symbol;Acc:HGNC:29893]	12	97431653	97565035	1
ENSG00000204681	-0.84578	3.91871	-14.6171	1.41e-12	1.38e-11	18.4056	2550	GABBR1	gamma-aminobutyric acid type B receptor subunit 1 [Source:HGNC Symbol;Acc:HGNC:4070]	6	29555629	29633976	-1
ENSG00000163624	-3.859	-0.161898	-14.2716	2.24e-12	2.1e-11	18.4054	1040	CDS1	CDP-diacylglycerol synthase 1 [Source:HGNC Symbol;Acc:HGNC:1800]	4	84582979	84651338	1
ENSG00000110321	0.502948	10.394	15.0941	7.53e-13	7.8e-12	18.3953	1982	EIF4G2	eukaryotic translation initiation factor 4 gamma 2 [Source:HGNC Symbol;Acc:HGNC:3297]	11	10797050	10809110	-1
ENSG00000110799	-3.95289	-0.602658	-14.3173	2.11e-12	1.99e-11	18.3945	7450	VWF	von Willebrand factor [Source:HGNC Symbol;Acc:HGNC:12726]	12	5948874	6124770	-1
ENSG00000167535	-0.835471	4.20354	-14.6538	1.34e-12	1.32e-11	18.3903	784	CACNB3	calcium voltage-gated channel auxiliary subunit beta 3 [Source:HGNC Symbol;Acc:HGNC:1403]	12	48813794	48828941	1
ENSG00000279713	-1.9619	1.64028	-14.2303	2.37e-12	2.21e-11	18.3859		CTD-3035K23.3		17	62679403	62681354	-1
ENSG00000121966	-1.17302	4.79718	-14.7242	1.22e-12	1.21e-11	18.3765	7852	CXCR4	C-X-C motif chemokine receptor 4 [Source:HGNC Symbol;Acc:HGNC:2561]	2	136114349	136118165	-1
ENSG00000152931	-3.53979	0.49965	-14.1772	2.55e-12	2.36e-11	18.3725	25859	PART1	prostate androgen-regulated transcript 1 (non-protein coding) [Source:HGNC Symbol;Acc:HGNC:17263]	5	60487713	60547657	1
ENSG00000163132	-3.29517	2.60876	-14.2648	2.26e-12	2.12e-11	18.3719	4487	MSX1	msh homeobox 1 [Source:HGNC Symbol;Acc:HGNC:7391]	4	4859666	4863936	1
ENSG00000204860	-4.21373	-1.16187	-14.313	2.12e-12	2e-11	18.3715		FAM201A	family with sequence similarity 201 member A [Source:HGNC Symbol;Acc:HGNC:27239]	9	38620474	38624990	1
ENSG00000198001	1.02154	3.75433	14.5855	1.47e-12	1.43e-11	18.3611	51135	IRAK4	interleukin 1 receptor associated kinase 4 [Source:HGNC Symbol;Acc:HGNC:17967]	12	43758944	43789543	1
ENSG00000270885	-0.910263	4.26789	-14.6393	1.37e-12	1.34e-11	18.3598	91608	RASL10B	RAS like family 10 member B [Source:HGNC Symbol;Acc:HGNC:30295]	17	35731649	35743521	1
ENSG00000116525	-1.47438	2.61624	-14.3447	2.03e-12	1.92e-11	18.3568	55223	TRIM62	tripartite motif containing 62 [Source:HGNC Symbol;Acc:HGNC:25574]	1	33145402	33182059	-1
ENSG00000121769	-1.31372	4.47805	-14.6367	1.37e-12	1.35e-11	18.3343	2170	FABP3	fatty acid binding protein 3 [Source:HGNC Symbol;Acc:HGNC:3557]	1	31365625	31376850	-1
ENSG00000167100	-1.37361	3.55794	-14.4735	1.71e-12	1.65e-11	18.3226	201191	SAMD14	sterile alpha motif domain containing 14 [Source:HGNC Symbol;Acc:HGNC:27312]	17	50110040	50129882	-1
ENSG00000165349	-1.41388	3.08211	-14.3934	1.9e-12	1.81e-11	18.3212	84889	SLC7A3	solute carrier family 7 member 3 [Source:HGNC Symbol;Acc:HGNC:11061]	X	70925582	70931125	-1
ENSG00000143590	-3.35803	0.848287	-14.1272	2.73e-12	2.51e-11	18.3207	1944	EFNA3	ephrin A3 [Source:HGNC Symbol;Acc:HGNC:3223]	1	155078872	155087538	1
ENSG00000181649	-3.8574	-0.733053	-14.2619	2.27e-12	2.12e-11	18.3175	7262	PHLDA2	pleckstrin homology like domain family A member 2 [Source:HGNC Symbol;Acc:HGNC:12385]	11	2928273	2929455	-1
ENSG00000179094	-1.29626	2.89907	-14.3636	1.98e-12	1.88e-11	18.3122	5187 102465532	PER1	period circadian clock 1 [Source:HGNC Symbol;Acc:HGNC:8845]	17	8140472	8156506	-1
ENSG00000228421	-1.6434	3.53401	-14.4476	1.77e-12	1.7e-11	18.3105		AC005013.5		7	28957667	28959345	1
ENSG00000167969	-0.784592	4.55913	-14.6448	1.36e-12	1.33e-11	18.2959	1632	ECI1	enoyl-CoA delta isomerase 1 [Source:HGNC Symbol;Acc:HGNC:2703]	16	2239395	2252300	-1
ENSG00000204217	-0.694512	5.20897	-14.7426	1.19e-12	1.19e-11	18.2951	659	BMPR2	bone morphogenetic protein receptor type 2 [Source:HGNC Symbol;Acc:HGNC:1078]	2	202376936	202567751	1
ENSG00000169375	-0.700354	5.90993	-14.8228	1.07e-12	1.08e-11	18.2951	25942	SIN3A	SIN3 transcription regulator family member A [Source:HGNC Symbol;Acc:HGNC:19353]	15	75369379	75455842	-1
ENSG00000145979	0.725443	4.54195	14.6664	1.32e-12	1.3e-11	18.2935	51256 107080638	TBC1D7	TBC1 domain family member 7 [Source:HGNC Symbol;Acc:HGNC:21066]	6	13266542	13328583	-1
ENSG00000145536	-4.88798	-0.960945	-14.2216	2.4e-12	2.23e-11	18.2745	170690	ADAMTS16	ADAM metallopeptidase with thrombospondin type 1 motif 16 [Source:HGNC Symbol;Acc:HGNC:17108]	5	5140330	5320304	1
ENSG00000104213	-3.8958	-0.278246	-14.1875	2.51e-12	2.33e-11	18.2744	5157	PDGFRL	platelet derived growth factor receptor like [Source:HGNC Symbol;Acc:HGNC:8805]	8	17576433	17644071	1
ENSG00000003509	0.688626	5.37012	14.7661	1.16e-12	1.15e-11	18.2741	55471	NDUFAF7	NADH:ubiquinone oxidoreductase complex assembly factor 7 [Source:HGNC Symbol;Acc:HGNC:28816]	2	37231631	37253403	1
ENSG00000134107	-4.64642	0.346175	-14.1389	2.69e-12	2.47e-11	18.2591	8553	BHLHE40	basic helix-loop-helix family member e40 [Source:HGNC Symbol;Acc:HGNC:1046]	3	4979116	4985323	1
ENSG00000055163	0.825973	6.35304	14.839	1.05e-12	1.06e-11	18.2523	26999	CYFIP2	cytoplasmic FMR1 interacting protein 2 [Source:HGNC Symbol;Acc:HGNC:13760]	5	157266079	157395595	1
ENSG00000122641	-5.44345	-1.52463	-14.2111	2.43e-12	2.26e-11	18.2503	3624	INHBA	inhibin beta A subunit [Source:HGNC Symbol;Acc:HGNC:6066]	7	41667168	41705834	-1
ENSG00000127603	-0.490576	8.40136	-14.9226	9.42e-13	9.58e-12	18.2458	23499 643314	MACF1	microtubule-actin crosslinking factor 1 [Source:HGNC Symbol;Acc:HGNC:13664]	1	39081316	39487177	1
ENSG00000133112	0.505422	10.0415	14.9742	8.8e-13	9e-12	18.2452	7178	TPT1	tumor protein, translationally-controlled 1 [Source:HGNC Symbol;Acc:HGNC:12022]	13	45333471	45341370	-1
ENSG00000091844	-1.4996	2.63632	-14.2539	2.3e-12	2.14e-11	18.2279	26575	RGS17	regulator of G-protein signaling 17 [Source:HGNC Symbol;Acc:HGNC:14088]	6	153004459	153131249	-1
ENSG00000200997	-2.42952	0.721798	-14.055	3.01e-12	2.74e-11	18.2221		RNU1-85P	RNA, U1 small nuclear 85, pseudogene [Source:HGNC Symbol;Acc:HGNC:48427]	17	58679527	58679690	-1
ENSG00000145808	-5.35485	-0.956081	-14.1743	2.56e-12	2.36e-11	18.2204	171019	ADAMTS19	ADAM metallopeptidase with thrombospondin type 1 motif 19 [Source:HGNC Symbol;Acc:HGNC:17111]	5	129460265	129738683	1
ENSG00000254894	-3.69497	-0.0264628	-14.103	2.82e-12	2.58e-11	18.2163		NAV2-AS1	NAV2 antisense RNA 1 [Source:HGNC Symbol;Acc:HGNC:40744]	11	20119684	20120632	-1
ENSG00000011677	-4.39564	-0.0253473	-14.1375	2.69e-12	2.48e-11	18.2161	2556	GABRA3	gamma-aminobutyric acid type A receptor alpha3 subunit [Source:HGNC Symbol;Acc:HGNC:4077]	X	152166234	152451358	-1
ENSG00000204628	0.438011	10.5098	14.962	8.94e-13	9.13e-12	18.2127	10399	RACK1	receptor for activated C kinase 1 [Source:HGNC Symbol;Acc:HGNC:4399]	5	181236909	181248096	-1
ENSG00000167371	-2.89549	1.22416	-14.0539	3.02e-12	2.74e-11	18.2092	112476	PRRT2	proline rich transmembrane protein 2 [Source:HGNC Symbol;Acc:HGNC:30500]	16	29811382	29815892	1
ENSG00000110330	0.59955	6.40522	14.8105	1.09e-12	1.09e-11	18.2079	329	BIRC2	baculoviral IAP repeat containing 2 [Source:HGNC Symbol;Acc:HGNC:590]	11	102347211	102378670	1
ENSG00000145990	-1.93374	2.991	-14.2711	2.24e-12	2.1e-11	18.2073	54438	GFOD1	glucose-fructose oxidoreductase domain containing 1 [Source:HGNC Symbol;Acc:HGNC:21096]	6	13357830	13487662	-1
ENSG00000162613	0.572603	8.85122	14.9125	9.54e-13	9.69e-12	18.2064	8880	FUBP1	far upstream element binding protein 1 [Source:HGNC Symbol;Acc:HGNC:4004]	1	77944055	77979110	-1
ENSG00000162980	0.666436	7.19644	14.8466	1.04e-12	1.05e-11	18.2018	26225	ARL5A	ADP ribosylation factor like GTPase 5A [Source:HGNC Symbol;Acc:HGNC:696]	2	151788984	151828492	-1
ENSG00000185269	-2.70077	0.513947	-14.038	3.08e-12	2.79e-11	18.1989	147111	NOTUM	NOTUM, palmitoleoyl-protein carboxylesterase [Source:HGNC Symbol;Acc:HGNC:27106]	17	81952507	81961840	-1
ENSG00000136935	0.716544	4.67706	14.6162	1.41e-12	1.38e-11	18.196	2800	GOLGA1	golgin A1 [Source:HGNC Symbol;Acc:HGNC:4424]	9	124878357	124948492	-1
ENSG00000263585	-1.04781	3.74626	-14.4282	1.81e-12	1.74e-11	18.1953		RP11-498C9.13		17	81932398	81933058	1
ENSG00000269113	-5.2695	-1.05268	-14.1549	2.63e-12	2.42e-11	18.1917	388630	TRABD2B	TraB domain containing 2B [Source:HGNC Symbol;Acc:HGNC:44200]	1	47760528	47996895	-1
ENSG00000108262	0.678936	5.90285	14.7593	1.17e-12	1.16e-11	18.1896	28964	GIT1	GIT ArfGAP 1 [Source:HGNC Symbol;Acc:HGNC:4272]	17	29573469	29594054	-1
ENSG00000070778	0.711972	5.22555	14.6828	1.29e-12	1.27e-11	18.1838	11099	PTPN21	protein tyrosine phosphatase, non-receptor type 21 [Source:HGNC Symbol;Acc:HGNC:9651]	14	88465778	88554733	-1
ENSG00000165915	-0.774041	4.43404	-14.5421	1.56e-12	1.51e-11	18.1808	91252	SLC39A13	solute carrier family 39 member 13 [Source:HGNC Symbol;Acc:HGNC:20859]	11	47407132	47416501	1
ENSG00000108861	-0.581006	6.2996	-14.7728	1.15e-12	1.14e-11	18.1779	1845	DUSP3	dual specificity phosphatase 3 [Source:HGNC Symbol;Acc:HGNC:3069]	17	43766121	43778988	-1
ENSG00000114107	-1.12811	4.26408	-14.4912	1.67e-12	1.61e-11	18.1686	80321	CEP70	centrosomal protein 70 [Source:HGNC Symbol;Acc:HGNC:29972]	3	138494344	138594538	-1
ENSG00000117151	-0.999837	3.62616	-14.3895	1.91e-12	1.82e-11	18.1661	1486	CTBS	chitobiase [Source:HGNC Symbol;Acc:HGNC:2496]	1	84549606	84574480	-1
ENSG00000215301	0.608487	8.99512	14.8875	9.86e-13	9.97e-12	18.166	1654	DDX3X	DEAD-box helicase 3, X-linked [Source:HGNC Symbol;Acc:HGNC:2745]	X	41333348	41364472	1
ENSG00000124491	-7.50073	-1.04479	-14.1153	2.77e-12	2.54e-11	18.1634	2162	F13A1	coagulation factor XIII A chain [Source:HGNC Symbol;Acc:HGNC:3531]	6	6144085	6321013	-1
ENSG00000146112	0.623481	6.00182	14.7485	1.18e-12	1.18e-11	18.163	170954	PPP1R18	protein phosphatase 1 regulatory subunit 18 [Source:HGNC Symbol;Acc:HGNC:29413]	6	30676389	30687895	-1
ENSG00000124422	0.4471	9.25451	14.8847	9.9e-13	1e-11	18.1521	23326	USP22	ubiquitin specific peptidase 22 [Source:HGNC Symbol;Acc:HGNC:12621]	17	20999593	21043760	-1
ENSG00000156508	0.520065	9.71841	14.8949	9.76e-13	9.88e-12	18.1486	1915	EEF1A1	eukaryotic translation elongation factor 1 alpha 1 [Source:HGNC Symbol;Acc:HGNC:3189]	6	73515750	73523797	-1
ENSG00000168502	-1.25076	3.46181	-14.3377	2.05e-12	1.94e-11	18.1473	23255	MTCL1	microtubule crosslinking factor 1 [Source:HGNC Symbol;Acc:HGNC:29121]	18	8705661	8832778	1
ENSG00000182463	-1.11142	3.86031	-14.4077	1.86e-12	1.78e-11	18.1439	128553	TSHZ2	teashirt zinc finger homeobox 2 [Source:HGNC Symbol;Acc:HGNC:13010]	20	52972407	53495330	1
ENSG00000073584	0.509038	7.96951	14.8351	1.06e-12	1.06e-11	18.1437	6605	SMARCE1	SWI/SNF related, matrix associated, actin dependent regulator of chromatin, subfamily e, member 1 [Source:HGNC Symbol;Acc:HGNC:11109]	17	40624962	40648508	-1
[truncated: 16,979 more rows]
