# Supplementary material for: CD146-assisted isolation and multi-omics characterisation of human pluripotent stem cell derived cranial Schwann cell precursor-like cells.
Source: Research Square preprint supplement (doi:10.21203/rs.3.rs-3324198/v1), 2023-09-19
Supplement: Supplementary file 9 [file 8e91750c7d8e89eac8cd5f9a.xlsx]

## Sheet: s4329527_phd_appendix 2
qPCR Primers
Primer name	Sequence 5’ to 3’
SOX10	F: CTGAGTTGGACCAGTACCTGC
	R: CTCTGTCTTCACCTGGGCTTT
p75/NGFR	F: CCTCATCCCTGTCTATTGCTCC
	R: GTTGGCTCCTTGCTTGTTCTGC
SNAI2	F: TAGAACTCACACGGGGGAGAAG
	R: CAGCAGCCAGATTCCTCATGTT
TFAP2a	F: AAGGTCCCGCATGTAGAAGAC
	R: CCTTGTTAATAGGGATGGCGGA
SOX9	F: GTACCCGCACTTGCACAAC
	R: TCTCGCTCTCGTTCAGAAGTC
FOXD3	F: AAGCCGCCTTACTCGTACATCG
	R: AGAGGTTGTGGCGGATGCTGTT
GAPDH	F: AGCCACATCGCTCAGACA
	R: GCCCAATACGACCAAATCC
GBX2	F: CTCGCTGCTCGCCTTCTC
	R: GCCAGTCAGATTGTCATCCG
LMX1B	F: GTGTGAACGGCAGCTACGC
	R: TCATCCTCGCTCTTCACGG
ZIC2	F: CAGTGCATCAAGCAGGAGCTAA
	GCTCTTCTTGGGATTGCTCAGT
ID2	F: GACCCGATGAGCCTGCTATAC
	R: AATAGTGGGATGCGAGTCCAG
SOX8	F: GACCAGTACCCGCACCTG
	R: GCTTCTCGCTCTCGCTCA
SOX6	F: GGATGCAATGACCCAGGATTT
	R: TGAATGGTACTGACAAGTGTTGG
SOX5	F: CAGCCAGAGTTAGCACAATAGG
	R: CTGTTGTTCCCGTCGGAGTT
LMO4	F: GGAGATCGGTTTCACTACATCAATG
	R: GATGAGCAATTCTGAGATGAAGGCAC
RXRG	F: ACATCCATGAGCCCATCAGC
	R: CCACATTTAGCTGAGAGCTGGG
PRDM1a	F: TTTCGGCCAGCTCTCCAATCTGAA
	R: CAGACCTGGCATTCATGTGGCTTT
SNAIL1	F: ACCACTATGCCGCGCTCTT
	R: GGTCGTAGGGCTGCTGGAA
PAX3	F: GCTGTGCCCAGGATGATGC
	R: CTGGTACCTGCACAGGATCT
PLXNA4	F: TCTCAGTACAACGTGCTG
	R: TAGCACTGGATCTGATTGC
CDH2	F: GGTGGAGGAGAAGAAGACCAG
	R: GGCATCAGGCTCCACAGT
CDH11	F: AGACGTTGGATCGAGAAGAG
	R: GGTTGTCCTTCGAGGATACT
NRP1	F: AAGGTTTCTCAGCAAACTACAGTG
	R: GGGAAGAAGCTGTGATCTGGTC
NRP2	F: GATTCGGGATGGGGACAGTGA
	R: GGTGAACTTGATGTAGAGCATGGA
DLX1	F:TGTCTCCTTCTCCCATGTCC
	R: ACTGATGTAGGGGCTGGATG
ETS1	F: GGCAGTTTCTTCTGAATTA
	R: CACGGCTCAGTTTCTCATA
TWIST1	F: CTTCTCGGTCTGGAGGATGG
	R: TGTCCATTTTCTCCTTCTCTGG
ZIC1	F: GAGCGACAAGCCCTATCTTTGC
	R: AGGCGTGGAGGATTCGTAGC
HNK-1	F: GGGTTGTGAGTGCTGGTAATG
	R: GGTCACTGCCCTCATCCTTATG
POU5F1	F: CGTGAAGCTGGAGAAGGAGA
	R: CTTGGCAAATTGCTCGAGTT
MSX1	F: CTCGTCAAAGCCGAGAGC
	R: CGGTTCGTCTTGTGTTTGC
NEFM	F: CCAAGGAAGAGATCGCCG-G
	R: GTGCCCCGAAGCTCATTTTC
HOXA1	F: GGCTACCTACCAGACTTCCG
	R: TTCTTGGTGGGTCTGCTTCC
HOXA2	F: ACATCTTTTCCCCCTGTCGC
	R: TTCAGGCTGGGAATGGTCTG
HOXA3	F: TCAGAATGCCAGCAACAAC
	R: AGTGAGGTTCAGCAGATTG
HOXA5	F: CGCCCAACCCCAGATCTAC
	R: CGGGCCGCCTATGTTGT
HOXA6	F: TGGCGCCTCGCCCTC
	R: CCCATACACAGCACCCGC
PMP22	F: GATCCTGTCGATCATCTTCAGC
	R: AGCACTCATCACGCACAGAC
CXCL12	F: CATGAACGCCAAGGTCGTG
	R: CTCTGGCAACATGGCTTTCG
VEGFB	F: CACCATGAGCCCTCTGCTC
	R: CAGGTAGCGCGAGTATACACAT
