# Supplementary material for: CD146-assisted isolation and multi-omics characterisation of human pluripotent stem cell derived cranial Schwann cell precursor-like cells.
Source: Research Square preprint supplement (doi:10.21203/rs.3.rs-3324198/v1), 2023-09-19
Supplement: Supplementary file 10 [file 967afee2681678c00fde28a1.xlsx]

## Sheet: Small RNAseq Data
Small RNA-seq Data
	Symbol	logFC	AveExpr	t	P.Value	adj.P.Val	B	Entrez_ID	Description	Chromosome	Start	End	Strand
ENSG00000168385	SEPT2	0.0226701	0.91641	0.113331	0.911504	0.945758	-7.53713	4735	septin 2 [Source:HGNC Symbol;Acc:HGNC:7729]	2	241315100	241354027	1
ENSG00000173926	MARCH3	0.98399	-0.545615	3.72051	0.00257787	0.00951621	-2.16153	115123	membrane associated ring-CH-type finger 3 [Source:HGNC Symbol;Acc:HGNC:28728]	5	126867714	127030808	-1
ENSG00000184640	SEPT9	0.26902	-0.243113	1.2244	0.242578	0.365713	-6.59001	10801	septin 9 [Source:HGNC Symbol;Acc:HGNC:7323]	17	77280569	77500596	1
ENSG00000138758	SEPT11	-0.526335	0.25618	-2.54972	0.0242429	0.0593376	-4.66657	55752	septin 11 [Source:HGNC Symbol;Acc:HGNC:25589]	4	76949703	77040384	1
ENSG00000283291	5_8S_rRNA	0.802283	2.72906	3.65201	0.00293715	0.01059	-2.59182		5.8S ribosomal RNA [Source:RFAM;Acc:RF00002]	20	29741510	29741661	-1
ENSG00000275877	5_8S_rRNA	-0.305283	1.04503	-1.46723	0.166143	0.273083	-6.481		5.8S ribosomal RNA [Source:RFAM;Acc:RF00002]	20	30484925	30485076	-1
ENSG00000283274	5_8S_rRNA	0.186016	2.15135	0.971381	0.349129	0.488032	-7.05225		5.8S ribosomal RNA [Source:RFAM;Acc:RF00002]	14	16057472	16057622	1
ENSG00000278294	5_8S_rRNA	0.127169	3.25936	0.782702	0.44786	0.582948	-7.16944		5.8S ribosomal RNA [Source:RFAM;Acc:RF00002]	KI270442.1	217250	217401	-1
ENSG00000276871	5_8S_rRNA	0.138649	2.13154	0.739019	0.473061	0.607765	-7.25442		5.8S ribosomal RNA [Source:RFAM;Acc:RF00002]	22	11249809	11249959	-1
ENSG00000202198	7SK	0.0921113	1.25501	0.440233	0.667017	0.772417	-7.44372		7SK RNA [Source:RFAM;Acc:RF00100]	6	52995620	52995950	1
ENSG00000107331	ABCA2	-2.38289	1.20857	-8.66476	9.4e-07	1.52e-05	5.74288	20	ATP binding cassette subfamily A member 2 [Source:HGNC Symbol;Acc:HGNC:32]	9	137007227	137028922	-1
ENSG00000103222	ABCC1	0.872859	-0.426917	3.8706	0.00193904	0.00751643	-1.91788	4363	ATP binding cassette subfamily C member 1 [Source:HGNC Symbol;Acc:HGNC:51]	16	15949577	16143074	1
ENSG00000164163	ABCE1	0.0570993	-0.0164141	0.28467	0.780392	0.859125	-7.38166	6059	ATP binding cassette subfamily E member 1 [Source:HGNC Symbol;Acc:HGNC:69]	4	145097932	145129179	1
ENSG00000204574	ABCF1	0.689916	0.347089	2.43705	0.0299731	0.0704396	-4.83096	23	ATP binding cassette subfamily F member 1 [Source:HGNC Symbol;Acc:HGNC:70]	6	30571376	30597179	1
ENSG00000204427	ABHD16A	-1.44193	1.43126	-4.94867	0.000268001	0.00161912	-0.173983	7920	abhydrolase domain containing 16A [Source:HGNC Symbol;Acc:HGNC:13921]	6	31686949	31703444	-1
ENSG00000138443	ABI2	0.00773655	0.240594	0.0399699	0.968726	0.979402	-7.4791	10152	abl interactor 2 [Source:HGNC Symbol;Acc:HGNC:24011]	2	203328219	203447723	1
ENSG00000268027	AC006129.2	1.28426	-0.685348	3.80753	0.00218508	0.0082886	-1.92249			19	41545192	41555462	1
ENSG00000223770	AC006145.4	0.422852	1.36376	0.923712	0.372505	0.512893	-7.09841	101927356		7	82009177	82029955	1
ENSG00000227946	AC007383.3	-0.00564934	-0.00223797	-0.0257975	0.979812	0.987385	-7.4322			2	206084605	206086564	1
ENSG00000264577	AC010761.8	0.462409	2.70727	2.26408	0.041365	0.0909149	-5.2			17	28721487	28722877	-1
ENSG00000225840	AC010970.2	-0.291853	2.55614	-1.20276	0.250571	0.37412	-6.79884			Y	10197256	10199103	-1
ENSG00000253190	AC084082.3	0.883372	3.08369	5.31102	0.000142334	0.000952867	0.531157			8	66112667	66115207	1
ENSG00000226789	AC110926.4	-0.0588928	2.04887	-0.297221	0.771005	0.850958	-7.49434			2	127247258	127250082	1
ENSG00000277475	AC213203.1	0.556304	3.95127	1.76687	0.10076	0.184193	-5.93365			KI270713.1	31698	32528	-1
ENSG00000120437	ACAT2	-0.121383	0.121217	-0.600449	0.558555	0.686621	-7.27348	39	acetyl-CoA acetyltransferase 2 [Source:HGNC Symbol;Acc:HGNC:94]	6	159760328	159779055	1
ENSG00000277492	ACEA_U3	0.878674	4.44349	3.96226	0.00163097	0.00657964	-1.88199		ACEA small nucleolar RNA U3 [Source:RFAM;Acc:RF01848]	X	70846079	70846295	-1
ENSG00000100813	ACIN1	-0.135357	0.360766	-0.532891	0.603122	0.721707	-7.35141	22985	apoptotic chromatin condensation inducer 1 [Source:HGNC Symbol;Acc:HGNC:17066]	14	23058564	23095614	-1
ENSG00000131473	ACLY	0.00393151	0.437793	0.0214736	0.983195	0.989185	-7.50911	47	ATP citrate lyase [Source:HGNC Symbol;Acc:HGNC:115]	17	41866908	41930542	-1
ENSG00000123983	ACSL3	-0.028558	0.206212	-0.14736	0.885115	0.931363	-7.46439	2181	acyl-CoA synthetase long-chain family member 3 [Source:HGNC Symbol;Acc:HGNC:3570]	2	222860934	222944639	1
ENSG00000075624	ACTB	0.310904	1.73994	1.59166	0.135533	0.232169	-6.30194	60	actin beta [Source:HGNC Symbol;Acc:HGNC:132]	7	5527151	5563784	-1
ENSG00000184009	ACTG1	-0.352529	1.89335	-1.6781	0.117249	0.208571	-6.17153	71	actin gamma 1 [Source:HGNC Symbol;Acc:HGNC:144]	17	81509971	81523847	-1
ENSG00000114739	ACVR2B	0.484359	0.428774	2.36152	0.0345209	0.0791805	-4.9969	93	activin A receptor type 2B [Source:HGNC Symbol;Acc:HGNC:174]	3	38453851	38493142	1
ENSG00000148848	ADAM12	2.22219	0.542963	4.30241	0.000864122	0.00397849	-1.20788	8038	ADAM metallopeptidase domain 12 [Source:HGNC Symbol;Acc:HGNC:190]	10	126012381	126388455	-1
ENSG00000154734	ADAMTS1	0.838766	-0.251737	3.70961	0.00263188	0.00968163	-2.2743	9510	ADAM metallopeptidase with thrombospondin type 1 motif 1 [Source:HGNC Symbol;Acc:HGNC:217]	21	26835747	26845409	-1
ENSG00000166106	ADAMTS15	4.29978	1.17211	13.6099	4.69e-09	2.2e-07	11.3191	170689	ADAM metallopeptidase with thrombospondin type 1 motif 15 [Source:HGNC Symbol;Acc:HGNC:16305]	11	130448974	130476641	1
ENSG00000160710	ADAR	0.0103035	0.184041	0.0374469	0.970699	0.979906	-7.4696	103	adenosine deaminase, RNA specific [Source:HGNC Symbol;Acc:HGNC:225]	1	154582062	154627999	-1
ENSG00000197381	ADARB1	0.114827	0.872144	0.592187	0.563908	0.689438	-7.35441	104	adenosine deaminase, RNA specific B1 [Source:HGNC Symbol;Acc:HGNC:226]	21	45073853	45226560	1
ENSG00000174233	ADCY6	0.942821	-0.429811	3.05976	0.00914944	0.0270444	-3.45789	112	adenylate cyclase 6 [Source:HGNC Symbol;Acc:HGNC:237]	12	48766194	48789037	-1
ENSG00000117114	ADGRL2	1.08473	0.0486429	3.91542	0.00178157	0.0070319	-1.94144	23266	adhesion G protein-coupled receptor L2 [Source:HGNC Symbol;Acc:HGNC:18582]	1	81306160	81992436	1
ENSG00000006831	ADIPOR2	0.021578	2.48211	0.098193	0.923281	0.9533	-7.52953	79602	adiponectin receptor 2 [Source:HGNC Symbol;Acc:HGNC:24041]	12	1688574	1788678	1
ENSG00000144843	ADPRH	2.27401	-0.87174	5.39756	0.000122695	0.000841263	1.13121	141	ADP-ribosylarginine hydrolase [Source:HGNC Symbol;Acc:HGNC:269]	3	119579268	119589945	1
ENSG00000130706	ADRM1	-0.0969032	0.234446	-0.531964	0.603745	0.721755	-7.33212	11047	adhesion regulating molecule 1 [Source:HGNC Symbol;Acc:HGNC:15759]	20	62302093	62308862	1
ENSG00000181026	AEN	1.08425	-0.0593287	4.84636	0.000321453	0.00186037	-0.161296	64782	apoptosis enhancing nuclease [Source:HGNC Symbol;Acc:HGNC:25722]	15	88621296	88632282	1
ENSG00000072364	AFF4	0.132274	0.595172	0.723213	0.482391	0.616236	-7.24541	27125	AF4/FMR2 family member 4 [Source:HGNC Symbol;Acc:HGNC:17869]	5	132875379	132963634	-1
ENSG00000084693	AGBL5	-0.0986341	4.46503	-0.382192	0.708509	0.805035	-7.31561	60509	ATP/GTP binding protein like 5 [Source:HGNC Symbol;Acc:HGNC:26147]	2	27042364	27070622	1
ENSG00000123908	AGO2	-0.455999	0.180131	-2.40331	0.0319286	0.0743301	-4.91793	27161	argonaute 2, RISC catalytic component [Source:HGNC Symbol;Acc:HGNC:3263]	8	140520156	140635619	-1
ENSG00000126070	AGO3	0.0966582	2.18965	0.474467	0.643057	0.75553	-7.42083	192669	argonaute 3, RISC catalytic component [Source:HGNC Symbol;Acc:HGNC:18421]	1	35930718	36072500	1
ENSG00000204310	AGPAT1	-0.495535	0.281564	-2.52256	0.0255186	0.0617885	-4.71979	10554 102466190	1-acylglycerol-3-phosphate O-acyltransferase 1 [Source:HGNC Symbol;Acc:HGNC:324]	6	32168212	32178096	-1
ENSG00000126705	AHDC1	-1.91325	-0.0828561	-7.98015	2.34e-06	3.4e-05	4.94366	27245	AT-hook DNA binding motif containing 1 [Source:HGNC Symbol;Acc:HGNC:25230]	1	27534035	27604431	-1
ENSG00000106546	AHR	5.50011	-1.55635	10.2892	1.32e-07	3.03e-06	8.02187	196	aryl hydrocarbon receptor [Source:HGNC Symbol;Acc:HGNC:348]	7	17298622	17346152	1
ENSG00000173209	AHSA2	-0.082806	0.888907	-0.405911	0.691426	0.7918	-7.45664	130872	AHA1, activator of heat shock 90kDa protein ATPase homolog 2 (yeast) [Source:HGNC Symbol;Acc:HGNC:20437]	2	61177418	61191203	1
ENSG00000170776	AKAP13	-0.150736	8.40327	-0.332226	0.745027	0.832776	-6.96033	11214 102465803	A-kinase anchoring protein 13 [Source:HGNC Symbol;Acc:HGNC:371]	15	85380571	85749358	1
ENSG00000135334	AKIRIN2	0.61848	-0.20557	2.53783	0.0247935	0.0604298	-4.53157	55122	akirin 2 [Source:HGNC Symbol;Acc:HGNC:21407]	6	87675072	87702209	-1
ENSG00000279988	AL022578.1	0.0254321	2.26997	0.140996	0.890039	0.933769	-7.52871			X	47835953	47836793	-1
ENSG00000109107	ALDOC	0.606556	-0.146128	2.70011	0.018223	0.0469213	-4.25081	230	aldolase, fructose-bisphosphate C [Source:HGNC Symbol;Acc:HGNC:418]	17	28573115	28577264	-1
ENSG00000139133	ALG10	0.355777	1.53492	1.64453	0.124078	0.217818	-6.22439	84920	ALG10, alpha-1,2-glucosyltransferase [Source:HGNC Symbol;Acc:HGNC:23162]	12	34022281	34029694	1
ENSG00000123505	AMD1	0.231252	0.354108	0.995722	0.337603	0.476763	-6.97362	262	adenosylmethionine decarboxylase 1 [Source:HGNC Symbol;Acc:HGNC:457]	6	110874770	110895713	1
ENSG00000166025	AMOTL1	-0.547912	0.413106	-2.87048	0.0131585	0.0360948	-4.09219	154810	angiomotin like 1 [Source:HGNC Symbol;Acc:HGNC:17811]	11	94706431	94876753	1
ENSG00000176915	ANKLE2	-0.0149826	-0.120577	-0.0762532	0.940381	0.964186	-7.39827	23141	ankyrin repeat and LEM domain containing 2 [Source:HGNC Symbol;Acc:HGNC:29101]	12	132725503	132761888	-1
ENSG00000206560	ANKRD28	0.501365	-0.148113	2.15264	0.0507612	0.106736	-5.23506	23243	ankyrin repeat domain 28 [Source:HGNC Symbol;Acc:HGNC:29024]	3	15667236	15859771	-1
ENSG00000151458	ANKRD50	0.912042	0.152001	3.67779	0.00279631	0.0102462	-2.43631	57182	ankyrin repeat domain 50 [Source:HGNC Symbol;Acc:HGNC:29223]	4	124664052	124712732	-1
ENSG00000139645	ANKRD52	0.0862277	0.622928	0.461326	0.652207	0.76096	-7.41127	283373	ankyrin repeat domain 52 [Source:HGNC Symbol;Acc:HGNC:26614]	12	56237807	56258391	-1
ENSG00000206199	ANKUB1	0.194189	2.26303	0.650236	0.526892	0.656825	-7.31549	389161	ankyrin repeat and ubiquitin domain containing 1 [Source:HGNC Symbol;Acc:HGNC:29642]	3	149761105	149968385	-1
ENSG00000279576	AP000769.1	0.33642	0.816726	1.55353	0.144355	0.24374	-6.34379		Metastasis-associated lung adenocarcinoma transcript 1 [Source:UniProtKB/Swiss-Prot;Acc:Q9UHZ2]	11	65502034	65503622	-1
ENSG00000120868	APAF1	0.870115	0.183637	3.4868	0.00402802	0.0137619	-2.81869	317	apoptotic peptidase activating factor 1 [Source:HGNC Symbol;Acc:HGNC:576]	12	98645141	98735433	1
ENSG00000189058	APOD	1.36737	0.951437	3.8408	0.00205154	0.0078542	-2.2071	347	apolipoprotein D [Source:HGNC Symbol;Acc:HGNC:612]	3	195568702	195584205	-1
ENSG00000143761	ARF1	0.808966	1.20171	4.24479	0.000961498	0.00422275	-1.47521	375 100500810	ADP ribosylation factor 1 [Source:HGNC Symbol;Acc:HGNC:652]	1	228082660	228099212	1
ENSG00000160007	ARHGAP35	0.807058	0.146489	3.05804	0.00917986	0.0270697	-3.6248	2909	Rho GTPase activating protein 35 [Source:HGNC Symbol;Acc:HGNC:4591]	19	46918676	47005077	1
ENSG00000258655	ARHGAP5-AS1	-0.042559	-0.0618049	-0.201728	0.843259	0.907365	-7.39569		ARHGAP5 antisense RNA 1 (head to head) [Source:HGNC Symbol;Acc:HGNC:20279]	14	32074946	32076793	-1
ENSG00000240771	ARHGEF25	-0.797937	0.252969	-2.51784	0.0257469	0.0622318	-4.72092	115557	Rho guanine nucleotide exchange factor 25 [Source:HGNC Symbol;Acc:HGNC:30275]	12	57610180	57619379	1
ENSG00000165801	ARHGEF40	-2.28355	3.99001	-9.70438	2.6e-07	5.11e-06	7.14744	55701	Rho guanine nucleotide exchange factor 40 [Source:HGNC Symbol;Acc:HGNC:25516]	14	21070270	21090240	1
ENSG00000131089	ARHGEF9	0.810536	-0.0550071	3.09961	0.00847469	0.0253218	-3.50147	23229	Cdc42 guanine nucleotide exchange factor 9 [Source:HGNC Symbol;Acc:HGNC:14561]	X	63634967	63809274	-1
ENSG00000117713	ARID1A	-0.243951	0.831347	-1.03255	0.320686	0.457042	-6.99404	8289	AT-rich interaction domain 1A [Source:HGNC Symbol;Acc:HGNC:11110]	1	26693236	26782104	1
ENSG00000049618	ARID1B	0.0655551	0.211165	0.275552	0.787234	0.861679	-7.43094	57492	AT-rich interaction domain 1B [Source:HGNC Symbol;Acc:HGNC:18040]	6	156777374	157210779	1
ENSG00000116017	ARID3A	-0.902868	0.247454	-4.02953	0.00143713	0.00592307	-1.84249	1820	AT-rich interaction domain 3A [Source:HGNC Symbol;Acc:HGNC:3031]	19	925781	975934	1
ENSG00000169379	ARL13B	0.512531	0.298622	1.87232	0.0838827	0.158063	-5.79599	200894	ADP ribosylation factor like GTPase 13B [Source:HGNC Symbol;Acc:HGNC:25419]	3	93980139	94055668	1
ENSG00000188042	ARL4C	-4.58089	-1.51501	-8.62984	9.84e-07	1.58e-05	6.05032	10123	ADP ribosylation factor like GTPase 4C [Source:HGNC Symbol;Acc:HGNC:698]	2	234493041	234497053	-1
ENSG00000165997	ARL5B	0.220369	-0.0531028	1.00983	0.33105	0.46992	-6.87929	221079	ADP ribosylation factor like GTPase 5B [Source:HGNC Symbol;Acc:HGNC:23052]	10	18659405	18681639	1
ENSG00000170540	ARL6IP1	-0.0326271	0.374295	-0.176016	0.863	0.917433	-7.4849	23204	ADP ribosylation factor like GTPase 6 interacting protein 1 [Source:HGNC Symbol;Acc:HGNC:697]	16	18791667	18801678	-1
ENSG00000099889	ARVCF	2.12441	0.0473191	7.461	4.83e-06	6.26e-05	4.27153	421	armadillo repeat gene deleted in velocardiofacial syndrome [Source:HGNC Symbol;Acc:HGNC:728]	22	19969896	20016808	-1
ENSG00000104763	ASAH1	1.21099	1.2981	6.69289	1.51e-05	0.000155355	2.83782	427	N-acylsphingosine amidohydrolase 1 [Source:HGNC Symbol;Acc:HGNC:735]	8	18055992	18084998	-1
ENSG00000088280	ASAP3	-0.315193	0.75188	-1.29803	0.216888	0.33556	-6.69054	55616	ArfGAP with SH3 domain, ankyrin repeat and PH domain 3 [Source:HGNC Symbol;Acc:HGNC:14987]	1	23428563	23484568	-1
ENSG00000065802	ASB1	-0.114394	0.12982	-0.535339	0.601476	0.721131	-7.31227	51665	ankyrin repeat and SOCS box containing 1 [Source:HGNC Symbol;Acc:HGNC:16011]	2	238426742	238452250	1
ENSG00000111875	ASF1A	0.0296928	0.0691479	0.157946	0.876933	0.926295	-7.43193	25842	anti-silencing function 1A histone chaperone [Source:HGNC Symbol;Acc:HGNC:20995]	6	118894220	118909167	1
ENSG00000171456	ASXL1	-0.00426064	0.109958	-0.0204217	0.984018	0.989192	-7.45597	171023	additional sex combs like 1, transcriptional regulator [Source:HGNC Symbol;Acc:HGNC:18318]	20	32358344	32439319	1
ENSG00000143970	ASXL2	0.642965	-0.329364	2.33274	0.0364209	0.0820825	-4.85869	55252	additional sex combs like 2, transcriptional regulator [Source:HGNC Symbol;Acc:HGNC:23805]	2	25733753	25878516	-1
ENSG00000156802	ATAD2	0.310961	-0.206373	1.32931	0.206659	0.323165	-6.46714	29028	ATPase family, AAA domain containing 2 [Source:HGNC Symbol;Acc:HGNC:30123]	8	123319850	123416350	-1
ENSG00000176208	ATAD5	-0.541928	0.808281	-2.80852	0.014816	0.0398038	-4.23779	79915	ATPase family, AAA domain containing 5 [Source:HGNC Symbol;Acc:HGNC:25752]	17	30831970	30895869	1
ENSG00000128272	ATF4	0.376076	1.39385	2.26426	0.0413511	0.0909149	-5.22357	468	activating transcription factor 4 [Source:HGNC Symbol;Acc:HGNC:786]	22	39519695	39522685	1
ENSG00000170653	ATF7	1.00909	1.50426	3.93736	0.00170932	0.00684002	-2.0711	11016	activating transcription factor 7 [Source:HGNC Symbol;Acc:HGNC:792]	12	53507856	53626410	-1
ENSG00000149311	ATM	1.2681	2.00556	6.013	4.4e-05	0.000369394	1.71172	472	ATM serine/threonine kinase [Source:HGNC Symbol;Acc:HGNC:795]	11	108222484	108369102	1
ENSG00000018625	ATP1A2	-1.96491	0.990583	-11.5185	3.5e-08	1.14e-06	9.16905	477	ATPase Na+/K+ transporting subunit alpha 2 [Source:HGNC Symbol;Acc:HGNC:800]	1	160115759	160143591	1
ENSG00000132681	ATP1A4	1.16508	-0.310361	4.61391	0.000488343	0.0025096	-0.516289	480	ATPase Na+/K+ transporting subunit alpha 4 [Source:HGNC Symbol;Acc:HGNC:14073]	1	160151570	160186977	1
ENSG00000069849	ATP1B3	0.309843	1.34595	1.66109	0.120667	0.213038	-6.20041	483	ATPase Na+/K+ transporting subunit beta 3 [Source:HGNC Symbol;Acc:HGNC:806]	3	141876124	141926514	1
ENSG00000174437	ATP2A2	0.266837	0.921343	1.31938	0.209864	0.327145	-6.66189	488	ATPase sarcoplasmic/endoplasmic reticulum Ca2+ transporting 2 [Source:HGNC Symbol;Acc:HGNC:812]	12	110280756	110351093	1
ENSG00000154518	ATP5G3	-0.008387	3.30408	-0.0493803	0.961369	0.976148	-7.48694	518	ATP synthase, H+ transporting, mitochondrial Fo complex subunit C3 (subunit 9) [Source:HGNC Symbol;Acc:HGNC:843]	2	175176258	175184607	-1
ENSG00000033627	ATP6V0A1	0.720184	5.48263	2.3453	0.0355797	0.0807048	-4.8409	535 100847046	ATPase H+ transporting V0 subunit a1 [Source:HGNC Symbol;Acc:HGNC:865]	17	42458844	42522611	1
ENSG00000138085	ATRAID	0.104218	0.0172211	0.495324	0.628658	0.742932	-7.29971	51374	all-trans retinoic acid induced differentiation factor [Source:HGNC Symbol;Acc:HGNC:24090]	2	27212027	27217178	1
ENSG00000164053	ATRIP	0.421106	-0.154111	1.90462	0.0792492	0.150653	-5.65331	84126	ATR interacting protein [Source:HGNC Symbol;Acc:HGNC:33499]	3	48446710	48465716	1
ENSG00000168488	ATXN2L	-0.130538	0.260267	-0.68036	0.508242	0.641649	-7.2442	11273	ataxin 2 like [Source:HGNC Symbol;Acc:HGNC:31326]	16	28823035	28837237	1
ENSG00000087152	ATXN7L3	0.00144956	-0.026128	0.00652714	0.994891	0.996125	-7.42895	56970	ataxin 7 like 3 [Source:HGNC Symbol;Acc:HGNC:25416]	17	44191805	44200113	-1
ENSG00000168646	AXIN2	-0.556617	0.298583	-2.79939	0.0150769	0.040243	-4.21162	8313	axin 2 [Source:HGNC Symbol;Acc:HGNC:904]	17	65528563	65561647	-1
ENSG00000155096	AZIN1	-0.476519	0.565996	-2.43603	0.0300307	0.0704413	-4.90703	51582	antizyme inhibitor 1 [Source:HGNC Symbol;Acc:HGNC:16432]	8	102826357	102893864	-1
ENSG00000149541	B3GAT3	0.701755	-0.154892	2.28699	0.0396486	0.0879226	-4.98081	26229	beta-1,3-glucuronyltransferase 3 [Source:HGNC Symbol;Acc:HGNC:923]	11	62615296	62622175	-1
ENSG00000170340	B3GNT2	0.35608	2.21478	1.62427	0.128364	0.223756	-6.25003	10678	UDP-GlcNAc:betaGal beta-1,3-N-acetylglucosaminyltransferase 2 [Source:HGNC Symbol;Acc:HGNC:15629]	2	62196113	62224731	1
ENSG00000204463	BAG6	-0.00986219	0.259911	-0.05198	0.959337	0.976148	-7.48286	7917	BCL2 associated athanogene 6 [Source:HGNC Symbol;Acc:HGNC:13919]	6	31639028	31652705	-1
ENSG00000266074	BAHCC1	-0.276273	0.265885	-1.21397	0.246407	0.370133	-6.74323	57597	BAH domain and coiled-coil containing 1 [Source:HGNC Symbol;Acc:HGNC:29279]	17	81395475	81466332	1
ENSG00000198604	BAZ1A	0.471036	0.0686033	2.36052	0.034585	0.0791805	-4.93055	11177	bromodomain adjacent to zinc finger domain 1A [Source:HGNC Symbol;Acc:HGNC:960]	14	34752731	34875647	-1
ENSG00000009954	BAZ1B	-0.980504	0.904861	-4.39167	0.000732926	0.00348456	-1.20955	9031	bromodomain adjacent to zinc finger domain 1B [Source:HGNC Symbol;Acc:HGNC:961]	7	73440398	73522278	-1
ENSG00000076108	BAZ2A	0.108146	-0.0184407	0.452801	0.658175	0.766118	-7.31101	11176	bromodomain adjacent to zinc finger domain 2A [Source:HGNC Symbol;Acc:HGNC:962]	12	56595596	56636816	-1
ENSG00000123636	BAZ2B	0.583852	0.24178	2.78615	0.0154635	0.0410505	-4.18439	29994	bromodomain adjacent to zinc finger domain 2B [Source:HGNC Symbol;Acc:HGNC:963]	2	159318979	159616692	-1
ENSG00000105327	BBC3	0.609333	1.54399	3.5389	0.00364566	0.0127187	-2.84134	27113 100422832	BCL2 binding component 3 [Source:HGNC Symbol;Acc:HGNC:17868]	19	47220822	47232766	-1
ENSG00000060982	BCAT1	1.23793	2.11235	4.21765	0.00101121	0.00440737	-1.52814	586	branched chain amino acid transaminase 1 [Source:HGNC Symbol;Acc:HGNC:976]	12	24810022	24949459	-1
ENSG00000099385	BCL7C	0.375572	0.880456	2.09792	0.0560753	0.115561	-5.49978	9274	BCL tumor suppressor 7C [Source:HGNC Symbol;Acc:HGNC:1006]	16	30833626	30894960	-1
ENSG00000029363	BCLAF1	-0.0352073	0.0421659	-0.158232	0.876711	0.926295	-7.42937	9774	BCL2 associated transcription factor 1 [Source:HGNC Symbol;Acc:HGNC:16863]	6	136256863	136289851	-1
ENSG00000115760	BIRC6	-0.270917	0.196461	-1.20642	0.249204	0.373203	-6.74116	57448	baculoviral IAP repeat containing 6 [Source:HGNC Symbol;Acc:HGNC:13516]	2	32357028	32618899	1
ENSG00000134897	BIVM	0.506373	-0.0747972	1.9108	0.0783887	0.149476	-5.65279	54841	basic, immunoglobulin-like variable motif containing [Source:HGNC Symbol;Acc:HGNC:16034]	13	102799049	102841535	1
ENSG00000270181	BIVM-ERCC5	0.62131	-0.239709	2.5838	0.0227287	0.0564683	-4.44014		BIVM-ERCC5 readthrough [Source:HGNC Symbol;Acc:HGNC:43690]	13	102807354	102872398	1
ENSG00000138696	BMPR1B	1.39043	-0.679701	5.54106	9.61e-05	0.000688237	1.25839	658	bone morphogenetic protein receptor type 1B [Source:HGNC Symbol;Acc:HGNC:1077]	4	94757968	95158448	1
ENSG00000144857	BOC	-0.914511	1.90305	-4.17241	0.00110006	0.00468751	-1.62133	91653	BOC cell adhesion associated, oncogene regulated [Source:HGNC Symbol;Acc:HGNC:17173]	3	113211003	113287459	1
ENSG00000261236	BOP1	-0.190392	0.324424	-0.891049	0.389136	0.529901	-7.08652	23246 102465906	block of proliferation 1 [Source:HGNC Symbol;Acc:HGNC:15519]	8	144262102	144291370	-1
ENSG00000204256	BRD2	-0.0896461	2.55084	-0.533053	0.603013	0.721707	-7.38278	6046	bromodomain containing 2 [Source:HGNC Symbol;Acc:HGNC:1103]	6	32968660	32981505	1
ENSG00000141867	BRD4	-0.262799	0.227106	-1.50318	0.156749	0.260233	-6.36838	23476	bromodomain containing 4 [Source:HGNC Symbol;Acc:HGNC:13575]	19	15235519	15332545	-1
ENSG00000172270	BSG	0.014225	0.513308	0.0761758	0.940442	0.964186	-7.51406	682	basigin (Ok blood group) [Source:HGNC Symbol;Acc:HGNC:1116]	19	571277	583493	1
ENSG00000064726	BTBD1	-0.939853	0.581841	-5.27939	0.00015031	0.000992851	0.442601	53339	BTB domain containing 1 [Source:HGNC Symbol;Acc:HGNC:1120]	15	83016422	83067354	-1
ENSG00000132640	BTBD3	0.433571	0.722623	2.01872	0.0646873	0.128184	-5.61843	22903	BTB domain containing 3 [Source:HGNC Symbol;Acc:HGNC:15854]	20	11890723	11926609	1
ENSG00000133639	BTG1	-0.315923	0.529316	-1.59198	0.135461	0.232169	-6.28246	694	BTG anti-proliferation factor 1 [Source:HGNC Symbol;Acc:HGNC:1130]	12	92140278	92145897	-1
ENSG00000110696	C11orf58	0.0586243	0.205508	0.277028	0.786125	0.861679	-7.43063	10944	chromosome 11 open reading frame 58 [Source:HGNC Symbol;Acc:HGNC:16990]	11	16613132	16756881	1
ENSG00000188070	C11orf95	0.147369	2.85856	0.717439	0.485826	0.619347	-7.24569	65998	chromosome 11 open reading frame 95 [Source:HGNC Symbol;Acc:HGNC:28449]	11	63759892	63768775	-1
ENSG00000111678	C12orf57	0.327149	4.18897	1.40837	0.182543	0.292848	-6.42517	113246	chromosome 12 open reading frame 57 [Source:HGNC Symbol;Acc:HGNC:29521]	12	6942978	6946003	1
ENSG00000166920	C15orf48	-0.0912481	2.35017	-0.444125	0.664273	0.770334	-7.43347	84419 100126311	chromosome 15 open reading frame 48 [Source:HGNC Symbol;Acc:HGNC:29898]	15	45430529	45448761	1
ENSG00000182831	C16orf72	-0.39748	1.04171	-2.02394	0.0640834	0.127089	-5.63957	29035	chromosome 16 open reading frame 72 [Source:HGNC Symbol;Acc:HGNC:30103]	16	9091648	9121640	1
ENSG00000105072	C19orf44	0.575168	0.302483	2.0639	0.059635	0.120683	-5.4823	84167	chromosome 19 open reading frame 44 [Source:HGNC Symbol;Acc:HGNC:26141]	19	16496311	16521352	1
ENSG00000167747	C19orf48	0.937896	7.47683	2.64416	0.0202698	0.0513377	-4.11554	84798	chromosome 19 open reading frame 48 [Source:HGNC Symbol;Acc:HGNC:29667]	19	50797704	50804929	-1
ENSG00000188032	C19orf67	-1.91151	0.0913095	-6.66999	1.56e-05	0.000158916	2.93345	646457	chromosome 19 open reading frame 67 [Source:HGNC Symbol;Acc:HGNC:34354]	19	14081619	14085875	-1
ENSG00000203709	C1orf132	1.08544	3.52074	4.81499	0.000339976	0.00192705	-0.343274	407025 407026	chromosome 1 open reading frame 132 [Source:HGNC Symbol;Acc:HGNC:32018]	1	207801518	207879096	-1
ENSG00000162642	C1orf52	0.890245	-0.448723	3.89503	0.00185153	0.00722242	-1.8629	148423	chromosome 1 open reading frame 52 [Source:HGNC Symbol;Acc:HGNC:24871]	1	85249953	85259672	-1
ENSG00000244731	C4A	0.561482	-0.0786545	2.60186	0.0219641	0.0548992	-4.4489	720	complement component 4A (Rodgers blood group) [Source:HGNC Symbol;Acc:HGNC:1323]	6	31982024	32002681	1
ENSG00000224389	C4B	0.561482	-0.0786545	2.60186	0.0219641	0.0548992	-4.4489	721	complement component 4B (Chido blood group) [Source:HGNC Symbol;Acc:HGNC:1324]	6	32014762	32035418	1
ENSG00000181751	C5orf30	0.386243	-0.084042	1.78136	0.0982736	0.18018	-5.86362	90355	chromosome 5 open reading frame 30 [Source:HGNC Symbol;Acc:HGNC:25052]	5	103258702	103278660	1
ENSG00000204387	C6orf48	0.824072	7.35889	2.77779	0.0157126	0.0414926	-3.88024	50854	chromosome 6 open reading frame 48 [Source:HGNC Symbol;Acc:HGNC:19078]	6	31834608	31839766	1
ENSG00000148362	C9orf142	0.28977	0.00985213	1.37904	0.191203	0.30282	-6.4667	286257	chromosome 9 open reading frame 142 [Source:HGNC Symbol;Acc:HGNC:27849]	9	136992418	136993984	1
ENSG00000148120	C9orf3	0.125932	8.46517	0.369563	0.717673	0.810675	-6.9403	84909 407012	chromosome 9 open reading frame 3 [Source:HGNC Symbol;Acc:HGNC:1361]	9	94726701	95087218	1
ENSG00000169239	CA5B	3.49897	2.05595	7.92791	2.51e-06	3.61e-05	4.77796	11238	carbonic anhydrase 5B [Source:HGNC Symbol;Acc:HGNC:1378]	X	15688830	15788409	1
ENSG00000166862	CACNG2	-0.283699	2.58582	-1.36555	0.195299	0.308045	-6.59886	10369	calcium voltage-gated channel auxiliary subunit gamma 2 [Source:HGNC Symbol;Acc:HGNC:1406]	22	36563921	36703558	-1
ENSG00000142408	CACNG8	-8.48471	-0.0170795	-17.1646	2.69e-10	2.22e-08	13.6905	59283 100126325	calcium voltage-gated channel auxiliary subunit gamma 8 [Source:HGNC Symbol;Acc:HGNC:13628]	19	53963040	53990215	1
ENSG00000182985	CADM1	0.582158	-0.548068	2.02796	0.063623	0.12648	-5.31119	23705	cell adhesion molecule 1 [Source:HGNC Symbol;Acc:HGNC:5951]	11	115169218	115504957	-1
ENSG00000198668	CALM1	-0.459641	0.676091	-2.5157	0.0258513	0.0624111	-4.77154	801 805	calmodulin 1 [Source:HGNC Symbol;Acc:HGNC:1442]	14	90396502	90408261	1
ENSG00000143933	CALM2	-0.152955	0.689998	-0.726343	0.480534	0.614181	-7.25794	805	calmodulin 2 [Source:HGNC Symbol;Acc:HGNC:1445]	2	47160082	47176601	-1
ENSG00000130559	CAMSAP1	0.105522	-0.0791156	0.539787	0.598491	0.718569	-7.25257	157922	calmodulin regulated spectrin associated protein 1 [Source:HGNC Symbol;Acc:HGNC:19946]	9	135808487	135907228	-1
ENSG00000127022	CANX	-0.135916	0.646693	-0.66029	0.520624	0.654471	-7.30159	821	calnexin [Source:HGNC Symbol;Acc:HGNC:1473]	5	179678628	179730925	1
ENSG00000126247	CAPNS1	0.601001	-0.177398	2.46216	0.028593	0.0681009	-4.67417	826	calpain small subunit 1 [Source:HGNC Symbol;Acc:HGNC:1481]	19	36139575	36150353	1
ENSG00000135387	CAPRIN1	-0.305805	0.43318	-1.42916	0.176604	0.28554	-6.49731	4076	cell cycle associated protein 1 [Source:HGNC Symbol;Acc:HGNC:6743]	11	34051683	34101156	1
ENSG00000249669	CARMN	-3.18028	8.74139	-8.03448	2.17e-06	3.18e-05	5.22022	406935	cardiac mesoderm enhancer-associated non-coding RNA [Source:HGNC Symbol;Acc:HGNC:42872]	5	149406689	149432835	1
ENSG00000134905	CARS2	0.510636	0.479346	2.76927	0.0159703	0.0419997	-4.25674	79587	cysteinyl-tRNA synthetase 2, mitochondrial (putative) [Source:HGNC Symbol;Acc:HGNC:25695]	13	110641412	110713603	-1
ENSG00000108349	CASC3	-0.00183157	3.0056	-0.00979313	0.992335	0.994745	-7.50976	22794 102466986	cancer susceptibility candidate 3 [Source:HGNC Symbol;Acc:HGNC:17040]	17	40140318	40172183	1
ENSG00000110395	CBL	0.148588	0.277455	0.705558	0.492943	0.627451	-7.21802	867	Cbl proto-oncogene [Source:HGNC Symbol;Acc:HGNC:1541]	11	119206276	119313926	1
ENSG00000160200	CBS	0.923865	3.23368	2.85031	0.0136771	0.0371064	-4.09958	875 102724560	cystathionine-beta-synthase [Source:HGNC Symbol;Acc:HGNC:1550]	21	43053191	43076943	-1
ENSG00000173894	CBX2	0.898242	2.74768	3.26913	0.00611727	0.0195768	-3.32635	84733	chromobox 2 [Source:HGNC Symbol;Acc:HGNC:1552]	17	79778132	79787983	1
ENSG00000122565	CBX3	0.663512	0.496692	2.78474	0.0155051	0.0410505	-4.21941	11335	chromobox 3 [Source:HGNC Symbol;Acc:HGNC:1553]	7	26201162	26213356	1
ENSG00000094916	CBX5	-0.5314	2.07284	-2.44249	0.0296688	0.0698571	-4.90381	23468 100616400	chromobox 5 [Source:HGNC Symbol;Acc:HGNC:1555]	12	54230940	54280133	-1
ENSG00000183741	CBX6	-0.257436	1.06142	-1.55411	0.144216	0.243672	-6.36126	23466	chromobox 6 [Source:HGNC Symbol;Acc:HGNC:1556]	22	38861450	38872314	-1
ENSG00000060339	CCAR1	1.63962	7.23274	4.90264	0.000290801	0.00171913	0.119597	55749	cell division cycle and apoptosis regulator 1 [Source:HGNC Symbol;Acc:HGNC:24236]	10	68721012	68792377	1
ENSG00000233098	CCDC144NL-AS1	0.114779	5.54046	0.469251	0.646682	0.755937	-7.17835	339260 440416 105369205	CCDC144NL antisense RNA 1 [Source:HGNC Symbol;Acc:HGNC:51340]	17	20868433	21002276	1
ENSG00000165813	CCDC186	-0.553659	4.40845	-2.45656	0.0288953	0.068623	-4.74185	55088 100302224	coiled-coil domain containing 186 [Source:HGNC Symbol;Acc:HGNC:24349]	10	114120862	114174220	-1
ENSG00000141519	CCDC40	-0.190474	0.785271	-0.673977	0.512161	0.646267	-7.30169	55036	coiled-coil domain containing 40 [Source:HGNC Symbol;Acc:HGNC:26090]	17	80036632	80100613	1
ENSG00000169515	CCDC8	-0.32394	0.345745	-1.72798	0.107712	0.19546	-6.06282	83987	coiled-coil domain containing 8 [Source:HGNC Symbol;Acc:HGNC:25367]	19	46410372	46413584	-1
ENSG00000091986	CCDC80	-0.947132	1.00499	-5.65492	7.94e-05	0.000585204	1.08631	151887	coiled-coil domain containing 80 [Source:HGNC Symbol;Acc:HGNC:30649]	3	112596794	112649530	-1
ENSG00000115355	CCDC88A	-0.519879	0.766744	-1.93836	0.0746577	0.143688	-5.77144	55704	coiled-coil domain containing 88A [Source:HGNC Symbol;Acc:HGNC:25523]	2	55287842	55419921	-1
ENSG00000204536	CCHCR1	0.475138	0.608817	2.07701	0.0582391	0.118792	-5.51127	54535	coiled-coil alpha-helical rod protein 1 [Source:HGNC Symbol;Acc:HGNC:13930]	6	31142439	31158238	-1
ENSG00000118971	CCND2	-1.42029	1.27845	-7.23429	6.7e-06	8.19e-05	3.66773	894	cyclin D2 [Source:HGNC Symbol;Acc:HGNC:1583]	12	4273772	4305350	1
ENSG00000118816	CCNI	0.12528	0.884718	0.673114	0.512692	0.64628	-7.30164	10983	cyclin I [Source:HGNC Symbol;Acc:HGNC:1595]	4	77047158	77076005	-1
ENSG00000163660	CCNL1	0.112147	10.5203	0.256906	0.801282	0.873223	-6.79944	57018	cyclin L1 [Source:HGNC Symbol;Acc:HGNC:20569]	3	157146508	157160760	-1
ENSG00000082258	CCNT2	0.288973	-0.0522197	1.47798	0.163285	0.269109	-6.31741	905	cyclin T2 [Source:HGNC Symbol;Acc:HGNC:1600]	2	134918235	134959342	1
ENSG00000163249	CCNYL1	-0.563778	0.428357	-2.00291	0.0665465	0.131239	-5.63994	151195 100616361	cyclin Y like 1 [Source:HGNC Symbol;Acc:HGNC:26868]	2	207711540	207761839	1
ENSG00000260916	CCPG1	-0.627798	3.71078	-3.18007	0.00725985	0.0222833	-3.44707	9236 693213	cell cycle progression 1 [Source:HGNC Symbol;Acc:HGNC:24227]	15	55340032	55408510	-1
ENSG00000146731	CCT6A	0.459655	0.0642027	2.02966	0.0634289	0.126381	-5.49457	908	chaperonin containing TCP1 subunit 6A [Source:HGNC Symbol;Acc:HGNC:1620]	7	56051630	56063989	1
ENSG00000135624	CCT7	0.288323	-0.228924	1.38665	0.188926	0.299596	-6.38912	10574	chaperonin containing TCP1 subunit 7 [Source:HGNC Symbol;Acc:HGNC:1622]	2	73233420	73253021	1
ENSG00000117281	CD160	0.843328	0.523173	3.38754	0.00487262	0.0162224	-3.06677	11126	CD160 molecule [Source:HGNC Symbol;Acc:HGNC:17013]	1	145719471	145739288	1
ENSG00000096401	CDC5L	0.87187	1.39285	3.92241	0.00175823	0.0069794	-2.0975	988	cell division cycle 5 like [Source:HGNC Symbol;Acc:HGNC:1743]	6	44387525	44450426	1
ENSG00000140937	CDH11	-2.52075	-0.257547	-9.82818	2.25e-07	4.45e-06	7.42392	1009	cadherin 11 [Source:HGNC Symbol;Acc:HGNC:1750]	16	64943753	65126112	-1
ENSG00000113361	CDH6	2.76256	-0.466735	6.82901	1.22e-05	0.00013004	3.45119	1004	cadherin 6 [Source:HGNC Symbol;Acc:HGNC:1765]	5	31193750	31329146	1
ENSG00000135446	CDK4	0.0769651	0.673397	0.375939	0.71304	0.808123	-7.45394	1019	cyclin dependent kinase 4 [Source:HGNC Symbol;Acc:HGNC:1773]	12	57747727	57756013	-1
ENSG00000176749	CDK5R1	0.200073	0.505771	0.938274	0.365251	0.504589	-7.05131	8851	cyclin dependent kinase 5 regulatory subunit 1 [Source:HGNC Symbol;Acc:HGNC:1775]	17	32486619	32491256	1
ENSG00000129757	CDKN1C	-0.421667	0.904028	-2.45124	0.0291857	0.0692277	-4.89759	1028	cyclin dependent kinase inhibitor 1C [Source:HGNC Symbol;Acc:HGNC:1786]	11	2883213	2885881	-1
ENSG00000007129	CEACAM21	1.3691	-0.691581	4.72317	0.000400859	0.00217271	-0.196927	90273	carcinoembryonic antigen related cell adhesion molecule 21 [Source:HGNC Symbol;Acc:HGNC:28834]	19	41549518	41586844	1
ENSG00000153879	CEBPG	0.441301	-0.0201507	1.63708	0.125638	0.220169	-6.08406	1054	CCAAT/enhancer binding protein gamma [Source:HGNC Symbol;Acc:HGNC:1837]	19	33373330	33382686	1
ENSG00000149187	CELF1	-0.150986	0.367294	-0.769544	0.45536	0.58992	-7.19424	10658	CUGBP, Elav-like family member 1 [Source:HGNC Symbol;Acc:HGNC:2549]	11	47465944	47565569	-1
ENSG00000048740	CELF2	2.61955	-0.212659	8.19022	1.76e-06	2.64e-05	5.38136	10659	CUGBP, Elav-like family member 2 [Source:HGNC Symbol;Acc:HGNC:2550]	10	10798397	11336675	1
ENSG00000140488	CELF6	-0.289863	1.11132	-1.21439	0.24625	0.370122	-6.80123	60677	CUGBP, Elav-like family member 6 [Source:HGNC Symbol;Acc:HGNC:14059]	15	72284727	72320129	-1
ENSG00000117724	CENPF	0.0665493	-0.156588	0.303876	0.766043	0.847196	-7.3403	1063	centromere protein F [Source:HGNC Symbol;Acc:HGNC:1857]	1	214603195	214664588	1
ENSG00000135837	CEP350	0.217701	0.0395305	0.990149	0.340217	0.479635	-6.91798	9857	centrosomal protein 350 [Source:HGNC Symbol;Acc:HGNC:24238]	1	179954738	180114880	1
ENSG00000172757	CFL1	0.113799	1.6732	0.593023	0.563366	0.689302	-7.35686	1072	cofilin 1 [Source:HGNC Symbol;Acc:HGNC:1874]	11	65823022	65862026	-1
ENSG00000276216	CH17-373J23.1	-1.13295	2.98674	-5.45463	0.000111313	0.000778341	0.76821			1	145281116	145281462	1
ENSG00000281181	CH507-513H4.3	-0.159647	6.74854	-0.651798	0.525915	0.656268	-6.95216			21	8437629	8438551	-1
ENSG00000280614	CH507-513H4.4	-0.159647	6.74854	-0.651798	0.525915	0.656268	-6.95216			21	8393419	8394341	-1
ENSG00000281383	CH507-513H4.5	-0.169016	6.7252	-0.692152	0.501048	0.635157	-6.92642			21	8254592	8255514	-1
ENSG00000280800	CH507-513H4.6	-0.159647	6.74854	-0.651798	0.525915	0.656268	-6.95216			21	8210384	8211306	-1
ENSG00000173575	CHD2	-0.187151	2.79841	-0.984818	0.342732	0.48263	-7.02204	1106 100422995	chromodomain helicase DNA binding protein 2 [Source:HGNC Symbol;Acc:HGNC:1917]	15	92900189	93028005	1
ENSG00000171316	CHD7	0.763143	0.0322185	3.53048	0.00370483	0.0128708	-2.69913	55636	chromodomain helicase DNA binding protein 7 [Source:HGNC Symbol;Acc:HGNC:20626]	8	60678778	60868028	1
ENSG00000033100	CHPF2	-0.415127	6.4546	-1.47796	0.163291	0.269109	-6.12461	54480 768213	chondroitin polymerizing factor 2 [Source:HGNC Symbol;Acc:HGNC:29270]	7	151232489	151238827	1
ENSG00000136213	CHST12	-2.01513	1.2091	-10.1848	1.49e-07	3.28e-06	7.65805	55501 101927181	carbohydrate sulfotransferase 12 [Source:HGNC Symbol;Acc:HGNC:17423]	7	2403560	2448483	1
ENSG00000154080	CHST9	0.0448598	0.460302	0.202371	0.842767	0.907229	-7.48862	83539	carbohydrate sulfotransferase 9 [Source:HGNC Symbol;Acc:HGNC:19898]	18	26906481	27185317	-1
ENSG00000079432	CIC	0.498421	0.317664	2.2608	0.0416164	0.0913054	-5.15516	23152	capicua transcriptional repressor [Source:HGNC Symbol;Acc:HGNC:14214]	19	42268537	42295797	1
ENSG00000099622	CIRBP	-0.221059	1.07317	-1.02248	0.325249	0.462481	-7.01058	1153	cold inducible RNA binding protein [Source:HGNC Symbol;Acc:HGNC:1982]	19	1259384	1274880	1
ENSG00000164442	CITED2	0.34548	0.30695	1.60825	0.131843	0.227262	-6.21111	10370	Cbp/p300 interacting transactivator with Glu/Asp rich carboxy-terminal domain 2 [Source:HGNC Symbol;Acc:HGNC:1987]	6	139371807	139374620	-1
ENSG00000175216	CKAP5	-0.123481	0.143815	-0.556921	0.587065	0.709692	-7.3044	9793	cytoskeleton associated protein 5 [Source:HGNC Symbol;Acc:HGNC:28959]	11	46743048	46846308	-1
ENSG00000163539	CLASP2	0.0213207	-0.151813	0.112981	0.911776	0.945758	-7.38465	23122	cytoplasmic linker associated protein 2 [Source:HGNC Symbol;Acc:HGNC:17078]	3	33496245	33718356	-1
ENSG00000113282	CLINT1	-0.38022	0.425308	-1.7693	0.100339	0.18356	-6.01009	9685	clathrin interactor 1 [Source:HGNC Symbol;Acc:HGNC:23186]	5	157785743	157859175	-1
ENSG00000179335	CLK3	0.158689	-0.077339	0.87517	0.397401	0.536273	-7.00469	1198	CDC like kinase 3 [Source:HGNC Symbol;Acc:HGNC:2071]	15	74598500	74645414	1
ENSG00000141367	CLTC	0.0375688	1.38867	0.170449	0.867287	0.921031	-7.53083	1213	clathrin heavy chain [Source:HGNC Symbol;Acc:HGNC:2092]	17	59619689	59696956	1
ENSG00000180917	CMTR2	-0.166437	1.56273	-0.844956	0.413453	0.549422	-7.17179	55783	cap methyltransferase 2 [Source:HGNC Symbol;Acc:HGNC:25635]	16	71281389	71289715	-1
ENSG00000117519	CNN3	0.374416	3.84889	1.58899	0.136135	0.232933	-6.20551	1266	calponin 3 [Source:HGNC Symbol;Acc:HGNC:2157]	1	94896949	94927278	-1
ENSG00000125107	CNOT1	-0.208404	0.455766	-0.891741	0.388778	0.529705	-7.10179	23019	CCR4-NOT transcription complex subunit 1 [Source:HGNC Symbol;Acc:HGNC:7877]	16	58519951	58629886	-1
ENSG00000113300	CNOT6	0.853008	-0.214908	2.98228	0.0106183	0.0306188	-3.68539	57472	CCR4-NOT transcription complex subunit 6 [Source:HGNC Symbol;Acc:HGNC:14099]	5	180494412	180578405	1
ENSG00000144580	CNOT9	0.634325	-0.138773	2.5063	0.0263136	0.0632804	-4.60814	9125	CCR4-NOT transcription complex subunit 9 [Source:HGNC Symbol;Acc:HGNC:10445]	2	218568580	218597080	1
ENSG00000173786	CNP	1.54815	0.0584868	6.31825	2.7e-05	0.000247379	2.42967	1267	2',3'-cyclic nucleotide 3' phosphodiesterase [Source:HGNC Symbol;Acc:HGNC:2158]	17	41966741	41977731	1
ENSG00000184144	CNTN2	-1.81479	0.888386	-5.9709	4.71e-05	0.000386573	1.65507	6900	contactin 2 [Source:HGNC Symbol;Acc:HGNC:2172]	1	205042937	205078499	1
ENSG00000106603	COA1	0.604012	0.907708	2.86188	0.0133773	0.0365331	-4.12032	55744	cytochrome c oxidase assembly factor 1 homolog [Source:HGNC Symbol;Acc:HGNC:21868]	7	43608456	43729717	-1
ENSG00000272617	COG8	-0.371503	1.0422	-2.05721	0.0603589	0.121949	-5.58438	84342	component of oligomeric golgi complex 8 [Source:HGNC Symbol;Acc:HGNC:18623]	16	69326913	69339667	-1
ENSG00000139219	COL2A1	1.2043	2.9429	4.58249	0.000517012	0.00261889	-0.801131	1280	collagen type II alpha 1 chain [Source:HGNC Symbol;Acc:HGNC:2200]	12	47972965	48004486	-1
ENSG00000204262	COL5A2	1.66388	-0.101072	6.54048	1.9e-05	0.000188626	2.82177	1290	collagen type V alpha 2 chain [Source:HGNC Symbol;Acc:HGNC:2210]	2	189031896	189179879	-1
ENSG00000114744	COMMD2	0.758069	0.190205	4.22625	0.000995169	0.00435518	-1.40505	51122	COMM domain containing 2 [Source:HGNC Symbol;Acc:HGNC:24993]	3	149738470	149752499	-1
ENSG00000127184	COX7C	0.586553	2.07702	3.4617	0.0042265	0.0143806	-2.98923	1350 100500805	cytochrome c oxidase subunit 7C [Source:HGNC Symbol;Acc:HGNC:2292]	5	86617904	86620962	1
ENSG00000071894	CPSF1	0.0861249	1.65675	0.498579	0.626425	0.741234	-7.41104	29894 100126351 100302196 102466749	cleavage and polyadenylation specific factor 1 [Source:HGNC Symbol;Acc:HGNC:2324]	8	144393229	144409349	-1
ENSG00000149532	CPSF7	0.0180446	0.636827	0.100286	0.921651	0.952809	-7.52268	79869	cleavage and polyadenylation specific factor 7 [Source:HGNC Symbol;Acc:HGNC:30098]	11	61402641	61430031	-1
ENSG00000005339	CREBBP	0.0574151	1.99964	0.325694	0.749851	0.837036	-7.48598	1387	CREB binding protein [Source:HGNC Symbol;Acc:HGNC:2348]	16	3725054	3880726	-1
ENSG00000009307	CSDE1	-0.101146	0.218438	-0.486027	0.635058	0.748214	-7.35473	7812	cold shock domain containing E1 [Source:HGNC Symbol;Acc:HGNC:29905]	1	114716913	114758676	-1
ENSG00000113712	CSNK1A1	0.0154302	-0.019303	0.0670422	0.947571	0.968243	-7.42577	1452	casein kinase 1 alpha 1 [Source:HGNC Symbol;Acc:HGNC:2451]	5	149492197	149551552	-1
ENSG00000141551	CSNK1D	0.0679693	2.09645	0.301232	0.768014	0.848515	-7.49351	1453	casein kinase 1 delta [Source:HGNC Symbol;Acc:HGNC:2452]	17	82239023	82273731	-1
ENSG00000234534	CSNK1G2P1	1.81252	-0.701959	5.83428	5.89e-05	0.000463361	1.8043		casein kinase 1 gamma 2 pseudogene 1 [Source:HGNC Symbol;Acc:HGNC:49739]	9	5040945	5041940	1
ENSG00000234715	CTB-107G13.1	0.252001	-0.317601	1.08733	0.296686	0.42951	-6.72158	101927870		7	103445207	103514007	1
ENSG00000269289	CTB-92J24.3	1.34106	0.626152	4.17354	0.00109774	0.00468751	-1.52968			19	23919081	23957930	-1
ENSG00000178971	CTC1	0.856621	4.01825	4.51694	0.00058258	0.00284625	-0.864239	80169	CTS telomere maintenance complex component 1 [Source:HGNC Symbol;Acc:HGNC:26169]	17	8224821	8248044	-1
ENSG00000248473	CTC-338M12.2	0.130871	1.23228	0.560239	0.584866	0.707725	-7.37999			5	181191046	181191852	-1
ENSG00000272023	CTC-350I8.1	0.648108	0.440207	2.94741	0.0113535	0.0320668	-3.90903			5	132963770	132964164	1
ENSG00000268362	CTD-2017D11.1	1.3686	-0.216106	4.77487	0.000365301	0.00203337	-0.219798			19	24033445	24066909	1
ENSG00000272772	CTD-2410N18.5	-0.0631705	3.43154	-0.276169	0.78677	0.861679	-7.43745			5	134167170	134226071	-1
ENSG00000261604	CTD-2636A23.2	0.681892	0.207319	2.94763	0.0113488	0.0320668	-3.86158			5	43287601	43290839	1
ENSG00000260035	CTD-2651B20.6	1.62273	8.71369	4.9192	0.000282374	0.00167869	0.260945			15	45200325	45200632	-1
ENSG00000259932	CTD-2651B20.7	1.55987	8.49021	5.1345	0.0001933	0.0012277	0.630941			15	45198517	45199139	-1
ENSG00000279602	CTD-3014M21.1	-0.257027	2.54125	-1.54172	0.147182	0.247166	-6.36369			17	43360041	43361361	-1
ENSG00000253774	CTD-3023L14.1	2.10361	0.859616	11.5495	3.39e-08	1.14e-06	9.26078			8	8559894	8562124	1
ENSG00000255224	CTD-3065J16.9	0.842018	-0.683006	2.87586	0.0130237	0.0358441	-3.74197			8	144078002	144079265	-1
ENSG00000137770	CTDSPL2	-0.0286851	0.312105	-0.150267	0.882866	0.929787	-7.48076	51496	CTD small phosphatase like 2 [Source:HGNC Symbol;Acc:HGNC:26936]	15	44427234	44529038	1
ENSG00000168036	CTNNB1	-0.106397	1.11285	-0.687954	0.503602	0.637416	-7.30023	1499	catenin beta 1 [Source:HGNC Symbol;Acc:HGNC:2514]	3	41194837	41260096	1
ENSG00000198561	CTNND1	0.390144	0.0804314	1.67787	0.117295	0.208571	-6.05986	1500	catenin delta 1 [Source:HGNC Symbol;Acc:HGNC:2515]	11	57753243	57819546	1
ENSG00000145476	CYP4V2	-0.00336922	0.673787	-0.0160305	0.987454	0.991859	-7.53148	285440	cytochrome P450 family 4 subfamily V member 2 [Source:HGNC Symbol;Acc:HGNC:23198]	4	186191520	186213456	1
ENSG00000180902	D2HGDH	-0.51263	0.485079	-2.44548	0.0295031	0.0696655	-4.88299	728294	D-2-hydroxyglutarate dehydrogenase [Source:HGNC Symbol;Acc:HGNC:28358]	2	241734579	241768816	1
ENSG00000173402	DAG1	0.786708	-0.101478	2.78683	0.0154433	0.0410442	-4.085	1605	dystroglycan 1 [Source:HGNC Symbol;Acc:HGNC:2666]	3	49468703	49535618	1
ENSG00000136279	DBNL	-0.284329	0.582242	-1.54607	0.146136	0.246076	-6.35171	28988 102466985	drebrin like [Source:HGNC Symbol;Acc:HGNC:2696]	7	44044640	44069456	1
ENSG00000057019	DCBLD2	0.454342	1.80349	1.82499	0.0911146	0.168804	-5.95374	131566	discoidin, CUB and LCCL domain containing 2 [Source:HGNC Symbol;Acc:HGNC:24627]	3	98795941	98901689	-1
ENSG00000172795	DCP2	-0.0681015	0.373816	-0.375366	0.713456	0.808123	-7.42821	167227	decapping mRNA 2 [Source:HGNC Symbol;Acc:HGNC:24452]	5	112976702	113020970	1
ENSG00000166847	DCTN5	0.138955	0.129561	0.657386	0.52243	0.654557	-7.22432	84516	dynactin subunit 5 [Source:HGNC Symbol;Acc:HGNC:24594]	16	23641392	23677455	1
ENSG00000150401	DCUN1D2	-0.67502	0.641567	-2.08073	0.0578482	0.118226	-5.52963	55208	defective in cullin neddylation 1 domain containing 2 [Source:HGNC Symbol;Acc:HGNC:20328]	13	113455819	113490952	-1
ENSG00000167986	DDB1	-0.359379	0.233612	-1.94754	0.0734518	0.142581	-5.70382	1642	damage specific DNA binding protein 1 [Source:HGNC Symbol;Acc:HGNC:2717]	11	61299451	61342596	-1
ENSG00000168209	DDIT4	-0.199947	0.997688	-1.07181	0.303348	0.43813	-6.95785	54541	DNA damage inducible transcript 4 [Source:HGNC Symbol;Acc:HGNC:24944]	10	72273920	72276036	1
ENSG00000204580	DDR1	-3.53131	-0.871569	-11.2053	4.85e-08	1.46e-06	9.00297	780 100616237	discoidin domain receptor tyrosine kinase 1 [Source:HGNC Symbol;Acc:HGNC:2730]	6	30876421	30900156	1
ENSG00000100201	DDX17	0.0407913	1.83291	0.184067	0.856808	0.914108	-7.52461	10521	DEAD-box helicase 17 [Source:HGNC Symbol;Acc:HGNC:2740]	22	38483440	38507660	-1
ENSG00000125485	DDX31	0.0462755	0.360826	0.207371	0.838941	0.905094	-7.47431	64794	DEAD-box helicase 31 [Source:HGNC Symbol;Acc:HGNC:16715]	9	132592997	132670401	-1
ENSG00000198563	DDX39B	1.08067	4.04187	2.20236	0.0463449	0.0996497	-5.21403	7919	DEAD-box helicase 39B [Source:HGNC Symbol;Acc:HGNC:13917]	6	31530219	31542448	-1
ENSG00000215301	DDX3X	-0.0704336	0.744613	-0.377138	0.71217	0.808083	-7.46105	1654	DEAD-box helicase 3, X-linked [Source:HGNC Symbol;Acc:HGNC:2745]	X	41333348	41364472	1
ENSG00000105671	DDX49	-0.708074	1.63209	-2.9683	0.0109071	0.0311807	-3.93793	54555	DEAD-box helicase 49 [Source:HGNC Symbol;Acc:HGNC:18684]	19	18919675	18928633	1
ENSG00000108654	DDX5	-0.163987	3.24899	-0.879409	0.395183	0.535486	-7.08992	1655 100616387 100616408	DEAD-box helicase 5 [Source:HGNC Symbol;Acc:HGNC:2746]	17	64499616	64508199	-1
ENSG00000278053	DDX52	0.323082	-0.253459	1.19866	0.252108	0.375283	-6.60387	11056	DEAD-box helicase 52 [Source:HGNC Symbol;Acc:HGNC:20038]	17	37609739	37643464	-1
ENSG00000110367	DDX6	0.0155086	0.864604	0.066098	0.948308	0.968243	-7.53943	1656	DEAD-box helicase 6 [Source:HGNC Symbol;Acc:HGNC:2747]	11	118747766	118791149	-1
ENSG00000124795	DEK	0.292728	0.969525	1.59666	0.134413	0.230728	-6.29004	7913	DEK proto-oncogene [Source:HGNC Symbol;Acc:HGNC:2768]	6	18223868	18264823	-1
ENSG00000128191	DGCR8	-0.157718	5.28433	-0.624989	0.54282	0.670985	-7.11469	54487 100302197 100500860	DGCR8 microprocessor complex subunit [Source:HGNC Symbol;Acc:HGNC:2847]	22	20080232	20111877	1
ENSG00000065357	DGKA	-0.00220589	0.60677	-0.0103666	0.991887	0.994698	-7.52608	1606	diacylglycerol kinase alpha [Source:HGNC Symbol;Acc:HGNC:2849]	12	55927319	55954027	1
ENSG00000114956	DGUOK	0.737703	-0.145137	2.61739	0.0213266	0.0535759	-4.39058	1716	deoxyguanosine kinase [Source:HGNC Symbol;Acc:HGNC:2858]	2	73926826	73958961	1
ENSG00000095059	DHPS	-0.630678	1.56229	-3.03061	0.00967673	0.028366	-3.82113	1725	deoxyhypusine synthase [Source:HGNC Symbol;Acc:HGNC:2869]	19	12675717	12681902	-1
ENSG00000109606	DHX15	0.821419	0.436288	3.75358	0.00242074	0.00905767	-2.34494	1665	DEAH-box helicase 15 [Source:HGNC Symbol;Acc:HGNC:2738]	4	24517441	24584550	-1
ENSG00000132153	DHX30	0.744569	1.30019	3.82148	0.00212805	0.00809705	-2.29038	22907	DEAH-box helicase 30 [Source:HGNC Symbol;Acc:HGNC:16716]	3	47802909	47850195	1
ENSG00000134815	DHX34	-0.0911299	0.157929	-0.444108	0.664285	0.770334	-7.36344	9704	DEAH-box helicase 34 [Source:HGNC Symbol;Acc:HGNC:16719]	19	47349281	47382704	1
ENSG00000135829	DHX9	0.06919	0.106734	0.35164	0.730756	0.8209	-7.38655	1660	DEAH-box helicase 9 [Source:HGNC Symbol;Acc:HGNC:2750]	1	182839369	182887751	1
ENSG00000235706	DICER1-AS1	0.141231	2.04397	0.658345	0.521833	0.654471	-7.31398	400242	DICER1 antisense RNA 1 [Source:HGNC Symbol;Acc:HGNC:43017]	14	95157645	95179933	1
ENSG00000101191	DIDO1	-0.283509	0.362718	-1.44458	0.172301	0.280046	-6.46792	11083	death inducer-obliterator 1 [Source:HGNC Symbol;Acc:HGNC:2680]	20	62877738	62937952	-1
ENSG00000066084	DIP2B	0.723142	0.114347	3.27827	0.00601067	0.019386	-3.20965	57609	disco interacting protein 2 homolog B [Source:HGNC Symbol;Acc:HGNC:29284]	12	50504985	50748667	1
ENSG00000130826	DKC1	0.20548	1.15954	1.17996	0.25921	0.384468	-6.83519	1736 100847052	dyskerin pseudouridine synthase 1 [Source:HGNC Symbol;Acc:HGNC:2890]	X	154762742	154777689	1
ENSG00000164741	DLC1	0.940594	-0.225617	3.92615	0.00174585	0.00694137	-1.86234	10395	DLC1 Rho GTPase activating protein [Source:HGNC Symbol;Acc:HGNC:2897]	8	13083361	13604610	-1
ENSG00000231607	DLEU2	1.92924	5.40038	7.5052	4.53e-06	6.03e-05	4.27722	406948	deleted in lymphocytic leukemia 2 (non-protein coding) [Source:HGNC Symbol;Acc:HGNC:13748]	13	49982552	50125720	-1
ENSG00000144355	DLX1	2.51991	0.456031	9.47934	3.4e-07	6.51e-06	6.96587	1745	distal-less homeobox 1 [Source:HGNC Symbol;Acc:HGNC:2914]	2	172084740	172089677	1
ENSG00000115844	DLX2	3.27287	-0.224092	10.2532	1.38e-07	3.1e-06	7.98078	1746	distal-less homeobox 2 [Source:HGNC Symbol;Acc:HGNC:2915]	2	172099439	172102900	-1
ENSG00000132002	DNAJB1	0.16807	0.154615	0.697522	0.497792	0.631999	-7.20142	3337	DnaJ heat shock protein family (Hsp40) member B1 [Source:HGNC Symbol;Acc:HGNC:5270]	19	14514770	14529770	-1
ENSG00000164031	DNAJB14	-0.600143	0.358716	-2.87262	0.0131048	0.0359873	-4.08202	79982	DnaJ heat shock protein family (Hsp40) member B14 [Source:HGNC Symbol;Acc:HGNC:25881]	4	99896248	99946726	-1
ENSG00000230630	DNM3OS	-2.67917	3.74517	-6.01141	4.41e-05	0.000369394	1.79281	406996 100628315	DNM3 opposite strand/antisense RNA [Source:HGNC Symbol;Acc:HGNC:41228]	1	172136531	172144794	-1
ENSG00000067334	DNTTIP2	0.121174	0.499372	0.596748	0.56095	0.688539	-7.32389	30836	deoxynucleotidyltransferase terminal interacting protein 2 [Source:HGNC Symbol;Acc:HGNC:24013]	1	93866283	93879918	-1
ENSG00000128512	DOCK4	-0.850255	1.05372	-3.66469	0.002867	0.0103976	-2.60514	9732	dedicator of cytokinesis 4 [Source:HGNC Symbol;Acc:HGNC:19192]	7	111726110	112206411	-1
ENSG00000159147	DONSON	-0.82541	0.543726	-4.34304	0.000801635	0.0037607	-1.28337	29980	downstream neighbor of SON [Source:HGNC Symbol;Acc:HGNC:2993]	21	33559542	33588708	-1
ENSG00000000419	DPM1	-0.210954	2.11008	-1.00905	0.33141	0.470161	-7.01394	8813	dolichyl-phosphate mannosyltransferase subunit 1, catalytic [Source:HGNC Symbol;Acc:HGNC:3005]	20	50934867	50958555	-1
ENSG00000142002	DPP9	0.271405	3.38213	1.4739	0.164365	0.270519	-6.40267	91039	dipeptidyl peptidase 9 [Source:HGNC Symbol;Acc:HGNC:18648]	19	4675224	4724673	-1
ENSG00000151914	DST	0.125793	0.539486	0.635901	0.535903	0.665379	-7.30288	667	dystonin [Source:HGNC Symbol;Acc:HGNC:1090]	6	56457987	56954628	-1
ENSG00000133059	DSTYK	1.14118	-0.558166	4.63274	0.000471964	0.00244572	-0.424048	25778	dual serine/threonine and tyrosine protein kinase [Source:HGNC Symbol;Acc:HGNC:29043]	1	205142505	205211566	-1
ENSG00000120875	DUSP4	3.07924	1.14082	13.9451	3.49e-09	1.76e-07	11.5979	1846	dual specificity phosphatase 4 [Source:HGNC Symbol;Acc:HGNC:3070]	8	29333064	29350668	-1
ENSG00000139318	DUSP6	0.574943	1.12867	2.46904	0.0282256	0.0673554	-4.85372	1848	dual specificity phosphatase 6 [Source:HGNC Symbol;Acc:HGNC:3072]	12	89347232	89353271	-1
ENSG00000107404	DVL1	0.858441	1.27929	4.15089	0.00114509	0.00484026	-1.656	1855 102466740	dishevelled segment polarity protein 1 [Source:HGNC Symbol;Acc:HGNC:3084]	1	1335276	1349350	-1
ENSG00000197102	DYNC1H1	-0.722186	0.729851	-2.95719	0.0111425	0.031615	-3.95348	1778	dynein cytoplasmic 1 heavy chain 1 [Source:HGNC Symbol;Acc:HGNC:2961]	14	101964528	102050792	1
ENSG00000264364	DYNLL2	0.692743	0.449037	3.53905	0.0036446	0.0127187	-2.77483	140735	dynein light chain LC8-type 2 [Source:HGNC Symbol;Acc:HGNC:24596]	17	58083415	58095536	1
ENSG00000101412	E2F1	0.313024	1.18568	1.99392	0.0676249	0.132942	-5.68162	1869	E2F transcription factor 1 [Source:HGNC Symbol;Acc:HGNC:3113]	20	33675683	33686404	-1
ENSG00000112242	E2F3	1.03255	-0.0998387	4.13121	0.00118796	0.00500437	-1.48916	1871	E2F transcription factor 3 [Source:HGNC Symbol;Acc:HGNC:3115]	6	20401906	20493715	1
ENSG00000117395	EBNA1BP2	-0.454885	1.28221	-1.65602	0.121701	0.214558	-6.21612	10969 102465439	EBNA1 binding protein 2 [Source:HGNC Symbol;Acc:HGNC:15531]	1	43164175	43270936	-1
ENSG00000074266	EED	0.689224	2.32821	3.08511	0.00871426	0.025975	-3.70232	8726 102465452	embryonic ectoderm development [Source:HGNC Symbol;Acc:HGNC:3188]	11	86244544	86278813	1
ENSG00000156508	EEF1A1	0.185116	1.64172	0.99734	0.336846	0.476237	-7.02882	1915	eukaryotic translation elongation factor 1 alpha 1 [Source:HGNC Symbol;Acc:HGNC:3189]	6	73515750	73523797	-1
ENSG00000250182	EEF1A1P13	0.838498	-0.180254	3.73586	0.00250369	0.00928389	-2.24662		eukaryotic translation elongation factor 1 alpha 1 pseudogene 13 [Source:HGNC Symbol;Acc:HGNC:3196]	5	14651941	14653329	-1
ENSG00000196205	EEF1A1P5	0.391563	0.636146	2.05752	0.0603252	0.121949	-5.54828		eukaryotic translation elongation factor 1 alpha 1 pseudogene 5 [Source:HGNC Symbol;Acc:HGNC:3200]	9	133019486	133020874	1
ENSG00000233476	EEF1A1P6	0.229424	0.287194	1.24522	0.235081	0.357354	-6.69033		eukaryotic translation elongation factor 1 alpha 1 pseudogene 6 [Source:HGNC Symbol;Acc:HGNC:3201]	7	22510616	22511999	-1
ENSG00000254772	EEF1G	-0.0838018	0.714757	-0.438634	0.668146	0.773222	-7.43329	1937	eukaryotic translation elongation factor 1 gamma [Source:HGNC Symbol;Acc:HGNC:3213]	11	62559601	62574086	-1
ENSG00000167658	EEF2	-0.136603	4.29162	-0.538856	0.599115	0.718648	-7.25384	1938	eukaryotic translation elongation factor 2 [Source:HGNC Symbol;Acc:HGNC:3214]	19	3976056	3985469	-1
ENSG00000100842	EFS	0.383298	-0.391083	1.6612	0.120643	0.213038	-5.95401	10278	embryonal Fyn-associated substrate [Source:HGNC Symbol;Acc:HGNC:16898]	14	23356402	23365752	-1
ENSG00000108883	EFTUD2	-0.045836	0.0430253	-0.198054	0.846073	0.908934	-7.42134	9343	elongation factor Tu GTP binding domain containing 2 [Source:HGNC Symbol;Acc:HGNC:30858]	17	44849943	44899662	-1
ENSG00000122877	EGR2	0.658579	0.0704701	2.92168	0.0119282	0.0332351	-3.8819	1959	early growth response 2 [Source:HGNC Symbol;Acc:HGNC:3239]	10	62811996	62919900	-1
ENSG00000110047	EHD1	0.677628	0.305922	3.0791	0.00881561	0.0262235	-3.63261	10938	EH domain containing 1 [Source:HGNC Symbol;Acc:HGNC:3242]	11	64851642	64888296	-1
ENSG00000181090	EHMT1	0.366262	-0.409027	1.69897	0.113171	0.202987	-5.90001	79813	euchromatic histone lysine methyltransferase 1 [Source:HGNC Symbol;Acc:HGNC:24650]	9	137618963	137870016	1
ENSG00000173812	EIF1	0.161118	0.522289	0.663793	0.518451	0.652542	-7.28012	10209	eukaryotic translation initiation factor 1 [Source:HGNC Symbol;Acc:HGNC:3249]	17	41688885	41692668	1
ENSG00000172071	EIF2AK3	0.231314	3.70095	1.02657	0.323392	0.460104	-6.91201	9451	eukaryotic translation initiation factor 2 alpha kinase 3 [Source:HGNC Symbol;Acc:HGNC:3255]	2	88556741	88627576	-1
ENSG00000128829	EIF2AK4	-2.58082	1.34855	-10.6034	9.29e-08	2.3e-06	8.15439	440275	eukaryotic translation initiation factor 2 alpha kinase 4 [Source:HGNC Symbol;Acc:HGNC:19687]	15	39934146	40035591	1
ENSG00000145191	EIF2B5	0.183868	-0.24884	0.944168	0.362344	0.501971	-6.89149	8893	eukaryotic translation initiation factor 2B subunit epsilon [Source:HGNC Symbol;Acc:HGNC:3261]	3	184135038	184145311	1
ENSG00000106263	EIF3B	-0.230292	0.749025	-1.3589	0.197343	0.310559	-6.61319	8662	eukaryotic translation initiation factor 3 subunit B [Source:HGNC Symbol;Acc:HGNC:3280]	7	2354086	2380745	1
ENSG00000184110	EIF3C	-0.311966	0.185475	-1.49693	0.158349	0.262362	-6.37091	8663 728689	eukaryotic translation initiation factor 3 subunit C [Source:HGNC Symbol;Acc:HGNC:3279]	16	28688558	28735730	1
ENSG00000130811	EIF3G	0.623643	-0.301007	2.9965	0.0103322	0.0298837	-3.65347	8666	eukaryotic translation initiation factor 3 subunit G [Source:HGNC Symbol;Acc:HGNC:3274]	19	10115017	10119918	-1
ENSG00000100129	EIF3L	0.0491989	0.0354811	0.207026	0.839205	0.905094	-7.41464	51386	eukaryotic translation initiation factor 3 subunit L [Source:HGNC Symbol;Acc:HGNC:18138]	22	37848868	37889407	1
ENSG00000161960	EIF4A1	-0.0958496	6.37637	-0.412167	0.686949	0.788293	-7.12255	1973	eukaryotic translation initiation factor 4A1 [Source:HGNC Symbol;Acc:HGNC:3282]	17	7572706	7579005	1
ENSG00000156976	EIF4A2	1.21565	9.17249	2.51774	0.025752	0.0622318	-4.19706	1974 100302143	eukaryotic translation initiation factor 4A2 [Source:HGNC Symbol;Acc:HGNC:3284]	3	186783205	186789900	1
ENSG00000151247	EIF4E	0.838618	-0.353657	3.1957	0.00704491	0.0217856	-3.23776	1977	eukaryotic translation initiation factor 4E [Source:HGNC Symbol;Acc:HGNC:3287]	4	98871684	98930637	-1
ENSG00000135930	EIF4E2	0.225019	3.29014	0.874165	0.397929	0.536273	-7.08929	9470	eukaryotic translation initiation factor 4E family member 2 [Source:HGNC Symbol;Acc:HGNC:3293]	2	232550052	232583644	1
ENSG00000148730	EIF4EBP2	0.506132	0.464445	2.45011	0.0292477	0.0692606	-4.84113	1979	eukaryotic translation initiation factor 4E binding protein 2 [Source:HGNC Symbol;Acc:HGNC:3289]	10	70404379	70428618	1
ENSG00000114867	EIF4G1	-0.0496213	0.80294	-0.257749	0.800646	0.873223	-7.50471	1981	eukaryotic translation initiation factor 4 gamma 1 [Source:HGNC Symbol;Acc:HGNC:3296]	3	184314495	184335358	1
ENSG00000110321	EIF4G2	0.41849	3.43604	2.12315	0.0535631	0.111399	-5.39988	1982	eukaryotic translation initiation factor 4 gamma 2 [Source:HGNC Symbol;Acc:HGNC:3297]	11	10797050	10809110	-1
ENSG00000075151	EIF4G3	-0.160743	0.681438	-0.860623	0.405077	0.543098	-7.14805	8672	eukaryotic translation initiation factor 4 gamma 3 [Source:HGNC Symbol;Acc:HGNC:3298]	1	20806292	21176888	-1
ENSG00000100664	EIF5	-0.152276	0.349806	-0.604406	0.556001	0.68416	-7.30896	1983	eukaryotic translation initiation factor 5 [Source:HGNC Symbol;Acc:HGNC:3299]	14	103333544	103345025	1
ENSG00000062598	ELMO2	0.313399	1.80697	1.72468	0.108321	0.196278	-6.10688	63916	engulfment and cell motility 2 [Source:HGNC Symbol;Acc:HGNC:17233]	20	46366049	46432985	-1
ENSG00000156030	ELMSAN1	0.265209	-0.049426	1.25226	0.23259	0.35432	-6.60816	91748	ELM2 and Myb/SANT domain containing 1 [Source:HGNC Symbol;Acc:HGNC:19853]	14	73715122	73790285	-1
ENSG00000066322	ELOVL1	0.726461	0.0835121	2.89451	0.0125662	0.0347781	-3.92714	64834 102466723	ELOVL fatty acid elongase 1 [Source:HGNC Symbol;Acc:HGNC:14418]	1	43363397	43368074	-1
ENSG00000125746	EML2	-0.329044	6.84197	-1.08745	0.296636	0.42951	-6.56115	24139 442902	echinoderm microtubule associated protein like 2 [Source:HGNC Symbol;Acc:HGNC:18035]	19	45606994	45645629	-1
ENSG00000171617	ENC1	0.875115	1.6713	4.7076	0.000412258	0.00220554	-0.617342	8507	ectodermal-neural cortex 1 [Source:HGNC Symbol;Acc:HGNC:3345]	5	74627406	74641424	-1
ENSG00000159023	EPB41	-0.135996	1.85187	-0.752838	0.464995	0.598957	-7.24341	2035	erythrocyte membrane protein band 4.1 [Source:HGNC Symbol;Acc:HGNC:3377]	1	28887091	29120046	1
ENSG00000120616	EPC1	0.0998456	0.162716	0.525257	0.608269	0.726002	-7.31611	80314	enhancer of polycomb homolog 1 [Source:HGNC Symbol;Acc:HGNC:19876]	10	32267751	32378798	-1
ENSG00000141736	ERBB2	1.22333	6.03426	4.1768	0.00109109	0.00466777	-1.33353	2064	erb-b2 receptor tyrosine kinase 2 [Source:HGNC Symbol;Acc:HGNC:3430]	17	39687914	39730426	1
ENSG00000065361	ERBB3	2.21034	-0.132276	8.20943	1.71e-06	2.59e-05	5.36915	2065	erb-b2 receptor tyrosine kinase 3 [Source:HGNC Symbol;Acc:HGNC:3431]	12	56079857	56103505	1
ENSG00000225830	ERCC6	1.17133	2.1058	6.54459	1.89e-05	0.000188178	2.59317	2074	ERCC excision repair 6, chromatin remodeling factor [Source:HGNC Symbol;Acc:HGNC:3438]	10	49455368	49539538	-1
ENSG00000105722	ERF	0.414103	-0.281385	1.80897	0.093688	0.173183	-5.76474	2077	ETS2 repressor factor [Source:HGNC Symbol;Acc:HGNC:3444]	19	42247572	42255157	-1
ENSG00000134954	ETS1	0.926613	-0.172128	4.67119	0.000440255	0.00232024	-0.469456	2113	ETS proto-oncogene 1, transcription factor [Source:HGNC Symbol;Acc:HGNC:3488]	11	128458761	128587558	-1
ENSG00000182944	EWSR1	-0.208729	0.983422	-0.915421	0.376679	0.515773	-7.1126	2130	EWS RNA binding protein 1 [Source:HGNC Symbol;Acc:HGNC:3508]	22	29268009	29300525	1
ENSG00000182473	EXOC7	0.237242	0.136063	1.28132	0.222519	0.34256	-6.61817	23265	exocyst complex component 7 [Source:HGNC Symbol;Acc:HGNC:23214]	17	76081017	76121576	-1
ENSG00000178896	EXOSC4	0.623389	1.28507	2.9808	0.0106485	0.0306701	-3.90688	54512 102465510	exosome component 4 [Source:HGNC Symbol;Acc:HGNC:18189]	8	144078626	144080647	1
ENSG00000012232	EXTL3	0.341511	0.127018	1.50122	0.15725	0.260715	-6.32258	2137	exostosin like glycosyltransferase 3 [Source:HGNC Symbol;Acc:HGNC:3518]	8	28600469	28755599	1
ENSG00000106462	EZH2	0.183954	0.266258	0.817366	0.428481	0.564848	-7.12374	2146	enhancer of zeste 2 polycomb repressive complex 2 subunit [Source:HGNC Symbol;Acc:HGNC:3527]	7	148807383	148884321	-1
ENSG00000092820	EZR	-0.143196	6.39024	-0.449117	0.660761	0.768406	-7.10444	7430	ezrin [Source:HGNC Symbol;Acc:HGNC:12691]	6	158765741	158819412	-1
ENSG00000162585	FAAP20	0.266765	2.66145	1.40085	0.184732	0.294782	-6.54291	199990	Fanconi anemia core complex associated protein 20 [Source:HGNC Symbol;Acc:HGNC:26428]	1	2184461	2212720	-1
ENSG00000149485	FADS1	-1.05798	3.54103	-4.22917	0.0009898	0.00433935	-1.44648	3992 100302263	fatty acid desaturase 1 [Source:HGNC Symbol;Acc:HGNC:3574]	11	61799625	61829318	-1
ENSG00000134824	FADS2	-0.162188	1.91658	-0.900277	0.384387	0.524587	-7.11878	9415	fatty acid desaturase 2 [Source:HGNC Symbol;Acc:HGNC:3575]	11	61792980	61867354	1
ENSG00000113194	FAF2	0.357066	-0.0865795	1.54481	0.146438	0.246418	-6.21522	23197	Fas associated factor family member 2 [Source:HGNC Symbol;Acc:HGNC:24666]	5	176447628	176510074	1
ENSG00000141699	FAM134C	-0.152802	0.666432	-0.849749	0.410879	0.546588	-7.15629	162427	family with sequence similarity 134 member C [Source:HGNC Symbol;Acc:HGNC:27258]	17	42579513	42610623	-1
ENSG00000113391	FAM172A	0.540745	5.59694	2.10407	0.0554529	0.114751	-5.24716	83989 100313887	family with sequence similarity 172 member A [Source:HGNC Symbol;Acc:HGNC:25365]	5	93618069	94111699	-1
ENSG00000125386	FAM193A	0.103596	0.226742	0.451769	0.658899	0.7666	-7.36423	8603	family with sequence similarity 193 member A [Source:HGNC Symbol;Acc:HGNC:16822]	4	2536631	2732565	1
ENSG00000158246	FAM46B	-0.161959	0.121245	-0.773213	0.453261	0.587747	-7.15062	115572	family with sequence similarity 46 member B [Source:HGNC Symbol;Acc:HGNC:28273]	1	27005020	27012836	-1
ENSG00000183508	FAM46C	-0.796885	0.913008	-3.96606	0.00161932	0.00655399	-2.02234	54855	family with sequence similarity 46 member C [Source:HGNC Symbol;Acc:HGNC:24712]	1	117605934	117628372	1
ENSG00000147689	FAM83A	0.981879	6.36291	3.22484	0.00666098	0.0209116	-3.12688	84985	family with sequence similarity 83 member A [Source:HGNC Symbol;Acc:HGNC:28210]	8	123178960	123210079	1
ENSG00000152767	FARP1	0.0177055	0.482301	0.0857748	0.932956	0.959291	-7.50945	10160	FERM, ARH/RhoGEF and pleckstrin domain protein 1 [Source:HGNC Symbol;Acc:HGNC:3591]	13	98142562	98455176	1
ENSG00000169710	FASN	0.206146	1.31265	1.30165	0.215684	0.333984	-6.69002	2194	fatty acid synthase [Source:HGNC Symbol;Acc:HGNC:3594]	17	82078333	82098332	-1
ENSG00000138081	FBXO11	0.850626	-0.36545	2.69439	0.0184225	0.0472875	-4.17095	80204	F-box protein 11 [Source:HGNC Symbol;Acc:HGNC:13590]	2	47789316	47905793	-1
ENSG00000145868	FBXO38	1.34192	0.329817	4.30882	0.000853938	0.00393893	-1.21995	81545	F-box protein 38 [Source:HGNC Symbol;Acc:HGNC:28844]	5	148383935	148442836	1
ENSG00000119402	FBXW2	0.108191	-0.105131	0.482403	0.63756	0.750587	-7.2798	26190	F-box and WD repeat domain containing 2 [Source:HGNC Symbol;Acc:HGNC:13608]	9	120751978	120793412	-1
ENSG00000143226	FCGR2A	0.259765	8.51487	0.785736	0.446142	0.581628	-6.68586	2212 9103	Fc fragment of IgG receptor IIa [Source:HGNC Symbol;Acc:HGNC:3616]	1	161505430	161524013	1
ENSG00000079459	FDFT1	-0.437854	0.814551	-2.03383	0.0629554	0.125759	-5.61738	2222	farnesyl-diphosphate farnesyltransferase 1 [Source:HGNC Symbol;Acc:HGNC:3629]	8	11795573	11839309	1
ENSG00000160752	FDPS	-0.0506657	0.916526	-0.311541	0.760341	0.843551	-7.49329	2224	farnesyl diphosphate synthase [Source:HGNC Symbol;Acc:HGNC:3631]	1	155308748	155320666	1
ENSG00000151422	FER	1.60355	0.633375	5.78723	6.37e-05	0.000492989	1.42583	2241	FER tyrosine kinase [Source:HGNC Symbol;Acc:HGNC:3655]	5	108747822	109196841	1
ENSG00000174721	FGFBP3	-0.45323	0.456162	-2.59215	0.0223722	0.0557503	-4.614	143282	fibroblast growth factor binding protein 3 [Source:HGNC Symbol;Acc:HGNC:23428]	10	91906589	91909483	-1
ENSG00000137460	FHDC1	4.82772	-0.693905	10.3428	1.24e-07	2.88e-06	8.08042	85462	FH2 domain containing 1 [Source:HGNC Symbol;Acc:HGNC:29363]	4	152936352	152979696	1
ENSG00000182263	FIGN	1.00044	-0.22137	4.59994	0.000500887	0.00255382	-0.583932	55137	fidgetin, microtubule severing factor [Source:HGNC Symbol;Acc:HGNC:13285]	2	163593396	163736012	-1
ENSG00000154803	FLCN	-0.209824	1.99049	-0.885943	0.391781	0.532483	-7.13133	201163	folliculin [Source:HGNC Symbol;Acc:HGNC:27310]	17	17212212	17237188	-1
ENSG00000177731	FLII	-1.45578	2.45735	-3.95304	0.00165955	0.0066624	-2.02797	2314	FLII, actin remodeling protein [Source:HGNC Symbol;Acc:HGNC:3750]	17	18244836	18258916	-1
ENSG00000196924	FLNA	0.0706984	1.05052	0.346936	0.734205	0.824399	-7.48236	2316	filamin A [Source:HGNC Symbol;Acc:HGNC:3754]	X	154348524	154374638	-1
ENSG00000164898	FMC1	0.390458	0.439013	1.79227	0.0964381	0.177472	-5.95135	154791	formation of mitochondrial complex V assembly factor 1 homolog [Source:HGNC Symbol;Acc:HGNC:26946]	7	139339457	139346319	1
ENSG00000137942	FNBP1L	1.58222	1.58292	7.91261	2.56e-06	3.67e-05	4.68525	54874	formin binding protein 1 like [Source:HGNC Symbol;Acc:HGNC:20851]	1	93448131	93554661	1
ENSG00000102531	FNDC3A	-0.101388	0.285228	-0.539388	0.598759	0.718569	-7.33679	22862	fibronectin type III domain containing 3A [Source:HGNC Symbol;Acc:HGNC:20296]	13	48975912	49209779	1
ENSG00000187140	FOXD3	0.696921	0.159707	2.301	0.0386324	0.0860544	-5.03724	27022	forkhead box D3 [Source:HGNC Symbol;Acc:HGNC:3804]	1	63323041	63325126	1
ENSG00000230798	FOXD3-AS1	2.61362	0.473919	9.09959	5.42e-07	9.19e-06	6.49539	100996301	FOXD3 antisense RNA 1 (head to head) [Source:HGNC Symbol;Acc:HGNC:40241]	1	63320884	63324441	-1
ENSG00000164946	FREM1	0.26868	0.291783	1.35903	0.197305	0.310559	-6.54948	158326	FRAS1 related extracellular matrix 1 [Source:HGNC Symbol;Acc:HGNC:23399]	9	14734666	14910995	-1
ENSG00000139926	FRMD6	1.63758	0.0710635	6.03726	4.23e-05	0.00035748	1.96327	122786	FERM domain containing 6 [Source:HGNC Symbol;Acc:HGNC:19839]	14	51489100	51730727	1
ENSG00000075618	FSCN1	-0.0671623	0.327629	-0.259772	0.799118	0.872758	-7.45915	6624	fascin actin-bundling protein 1 [Source:HGNC Symbol;Acc:HGNC:11148]	7	5592823	5606655	1
ENSG00000186628	FSD2	0.674517	9.59597	1.7907	0.0966997	0.177571	-5.38449	123722	fibronectin type III and SPRY domain containing 2 [Source:HGNC Symbol;Acc:HGNC:18024]	15	82755362	82806070	-1
ENSG00000053108	FSTL4	-1.89906	0.804581	-5.74141	6.87e-05	0.000525349	1.27327	23105	follistatin like 4 [Source:HGNC Symbol;Acc:HGNC:21389]	5	133196455	133612564	-1
ENSG00000087086	FTL	0.350833	1.27938	2.02553	0.0639007	0.126828	-5.62921	2512	ferritin light chain [Source:HGNC Symbol;Acc:HGNC:3999]	19	48965301	48966878	1
ENSG00000108592	FTSJ3	-0.540452	0.660781	-2.79296	0.0152635	0.0406791	-4.25945	117246	FtsJ homolog 3 [Source:HGNC Symbol;Acc:HGNC:17136]	17	63819433	63830012	-1
ENSG00000162613	FUBP1	0.283136	0.365726	1.67566	0.117734	0.209052	-6.12238	8880	far upstream element binding protein 1 [Source:HGNC Symbol;Acc:HGNC:4004]	1	77944055	77979110	-1
ENSG00000089280	FUS	0.0971212	1.9236	0.518425	0.612893	0.729172	-7.40048	2521	FUS RNA binding protein [Source:HGNC Symbol;Acc:HGNC:4010]	16	31180110	31194871	1
ENSG00000114416	FXR1	0.324482	0.174441	1.05163	0.312173	0.448523	-6.8845	8087	FMR1 autosomal homolog 1 [Source:HGNC Symbol;Acc:HGNC:4023]	3	180868141	180982753	1
ENSG00000145907	G3BP1	0.141754	0.940699	0.768829	0.45577	0.589987	-7.23236	10146	G3BP stress granule assembly factor 1 [Source:HGNC Symbol;Acc:HGNC:30292]	5	151771045	151812785	1
ENSG00000139112	GABARAPL1	-1.20131	0.513555	-6.16133	3.46e-05	0.000305402	1.98235	23710	GABA type A receptor associated protein like 1 [Source:HGNC Symbol;Acc:HGNC:4068]	12	10212458	10223130	1
ENSG00000244879	GABPB1-AS1	0.653562	0.0443604	3.14233	0.00780632	0.0237255	-3.45933	100616396	GABPB1 antisense RNA 1 [Source:HGNC Symbol;Acc:HGNC:44157]	15	50354959	50372202	1
ENSG00000102287	GABRE	-2.72621	4.49212	-8.91089	6.87e-07	1.15e-05	6.17259	2564 407009 574412	gamma-aminobutyric acid type A receptor epsilon subunit [Source:HGNC Symbol;Acc:HGNC:4085]	X	151953124	151974680	-1
ENSG00000156958	GALK2	-0.0132216	0.905279	-0.0486222	0.961961	0.976148	-7.54293	2585	galactokinase 2 [Source:HGNC Symbol;Acc:HGNC:4119]	15	49155656	49367869	1
ENSG00000111640	GAPDH	-0.692641	0.785696	-3.81655	0.00214804	0.00816058	-2.30628	2597	glyceraldehyde-3-phosphate dehydrogenase [Source:HGNC Symbol;Acc:HGNC:4141]	12	6533927	6538374	1
ENSG00000234741	GAS5	0.448394	11.8814	1.10377	0.289756	0.421447	-6.10799	60674	growth arrest specific 5 (non-protein coding) [Source:HGNC Symbol;Acc:HGNC:16355]	1	173863900	173868882	-1
ENSG00000007237	GAS7	3.40857	-1.16915	6.36263	2.51e-05	0.000234991	2.80163	8522	growth arrest specific 7 [Source:HGNC Symbol;Acc:HGNC:4169]	17	9910609	10198551	-1
ENSG00000082516	GEMIN5	0.27189	0.653599	1.23175	0.239911	0.362796	-6.75201	25929	gem nuclear organelle associated protein 5 [Source:HGNC Symbol;Acc:HGNC:20043]	5	154887416	154938209	-1
ENSG00000151892	GFRA1	3.66433	-1.46201	6.69004	1.51e-05	0.000155386	3.31529	2674	GDNF family receptor alpha 1 [Source:HGNC Symbol;Acc:HGNC:4243]	10	116056925	116273467	-1
ENSG00000125447	GGA3	0.427066	-0.332001	1.66452	0.119971	0.212403	-5.96233	23163	golgi associated, gamma adaptin ear containing, ARF binding protein 3 [Source:HGNC Symbol;Acc:HGNC:17079]	17	75236599	75262363	-1
ENSG00000182963	GJC1	0.468759	0.0271652	1.96779	0.0708537	0.137975	-5.58499	10052	gap junction protein gamma 1 [Source:HGNC Symbol;Acc:HGNC:4280]	17	44798448	44830816	-1
ENSG00000090863	GLG1	0.0121214	0.436967	0.0504283	0.96055	0.976148	-7.50771	2734	golgi glycoprotein 1 [Source:HGNC Symbol;Acc:HGNC:4316]	16	74447427	74607144	-1
ENSG00000106571	GLI3	0.289413	0.180378	1.14209	0.274067	0.400843	-6.78654	2737	GLI family zinc finger 3 [Source:HGNC Symbol;Acc:HGNC:4319]	7	41960950	42237870	-1
ENSG00000124767	GLO1	0.51605	0.0932871	2.58091	0.0228537	0.0565592	-4.53839	2739	glyoxalase I [Source:HGNC Symbol;Acc:HGNC:4323]	6	38675925	38703141	-1
ENSG00000182512	GLRX5	0.249118	2.95257	1.30951	0.213087	0.330712	-6.64525	51218	glutaredoxin 5 [Source:HGNC Symbol;Acc:HGNC:20134]	14	95533503	95544724	1
ENSG00000135821	GLUL	0.133705	3.25149	0.631362	0.538774	0.667271	-7.28062	2752	glutamate-ammonia ligase [Source:HGNC Symbol;Acc:HGNC:4341]	1	182381704	182392206	-1
ENSG00000065135	GNAI3	0.398248	8.8737	1.0358	0.319224	0.456126	-6.42492	2773 406974	G protein subunit alpha i3 [Source:HGNC Symbol;Acc:HGNC:4387]	1	109548611	109618321	1
ENSG00000087460	GNAS	0.0593463	1.3995	0.317702	0.755769	0.840988	-7.4921	2778	GNAS complex locus [Source:HGNC Symbol;Acc:HGNC:4392]	20	58839718	58911192	1
ENSG00000078369	GNB1	-0.337872	0.507729	-1.70279	0.11244	0.202114	-6.11855	2782	G protein subunit beta 1 [Source:HGNC Symbol;Acc:HGNC:4396]	1	1785285	1891117	-1
ENSG00000134697	GNL2	0.041491	0.362846	0.234268	0.818435	0.886816	-7.46844	29889	G protein nucleolar 2 [Source:HGNC Symbol;Acc:HGNC:29925]	1	37566816	37595935	-1
ENSG00000163938	GNL3	1.74644	5.45917	4.28357	0.000894794	0.00407427	-1.17494	26354	G protein nucleolar 3 [Source:HGNC Symbol;Acc:HGNC:29931]	3	52681156	52694492	1
ENSG00000089351	GRAMD1A	-0.0669043	1.11379	-0.397825	0.697231	0.796973	-7.46486	57655	GRAM domain containing 1A [Source:HGNC Symbol;Acc:HGNC:29305]	19	34994784	35026471	1
ENSG00000263001	GTF2I	0.120006	0.2572	0.647205	0.52879	0.658529	-7.25617	2969	general transcription factor IIi [Source:HGNC Symbol;Acc:HGNC:4659]	7	74657667	74760692	1
ENSG00000125484	GTF3C4	-0.059314	1.02243	-0.311804	0.760146	0.843551	-7.4963	9329	general transcription factor IIIC subunit 4 [Source:HGNC Symbol;Acc:HGNC:4667]	9	132670035	132694955	1
ENSG00000144366	GULP1	1.35855	-0.736893	4.12517	0.00120143	0.00504397	-1.3195	51454	GULP, engulfment adaptor PTB domain containing 1 [Source:HGNC Symbol;Acc:HGNC:18649]	2	188291669	188595931	1
ENSG00000188486	H2AFX	-0.299971	1.94228	-1.46423	0.166947	0.274041	-6.47434	3014	H2A histone family member X [Source:HGNC Symbol;Acc:HGNC:4739]	11	119093854	119095467	-1
ENSG00000164032	H2AFZ	0.195902	0.560859	1.16666	0.264353	0.389995	-6.82119	3015	H2A histone family member Z [Source:HGNC Symbol;Acc:HGNC:4741]	4	99948086	99950388	-1
ENSG00000132475	H3F3B	-0.142594	1.60674	-0.774559	0.452492	0.587125	-7.22899	3021 100616282	H3 histone, family 3B [Source:HGNC Symbol;Acc:HGNC:4765]	17	75776434	75785893	-1
ENSG00000130956	HABP4	-1.42265	0.768087	-5.24002	0.000160898	0.00105658	0.371707	22927	hyaluronan binding protein 4 [Source:HGNC Symbol;Acc:HGNC:17062]	9	96450201	96491336	1
ENSG00000115677	HDLBP	-0.0858317	0.422366	-0.446551	0.662565	0.769421	-7.40344	3069	high density lipoprotein binding protein [Source:HGNC Symbol;Acc:HGNC:4857]	2	241227264	241317061	-1
ENSG00000128731	HERC2	-0.54822	2.32301	-2.8062	0.0148817	0.039894	-4.23661	8924	HECT and RLD domain containing E3 ubiquitin protein ligase 2 [Source:HGNC Symbol;Acc:HGNC:4868]	15	28111040	28322152	-1
ENSG00000114315	HES1	0.168234	0.293086	0.922298	0.373214	0.513014	-7.04018	3280	hes family bHLH transcription factor 1 [Source:HGNC Symbol;Acc:HGNC:5192]	3	194136145	194138732	1
ENSG00000179111	HES7	1.13271	3.14838	6.12429	3.67e-05	0.000322734	1.94545	84667	hes family bHLH transcription factor 7 [Source:HGNC Symbol;Acc:HGNC:15977]	17	8120590	8124092	-1
ENSG00000186834	HEXIM1	-0.176736	0.369118	-0.947791	0.360564	0.499786	-7.03947	10614	hexamethylene bisacetamide inducible 1 [Source:HGNC Symbol;Acc:HGNC:24953]	17	45148502	45152101	1
ENSG00000100644	HIF1A	-0.267862	0.237004	-1.44605	0.171897	0.279745	-6.44774	3091	hypoxia inducible factor 1 alpha subunit [Source:HGNC Symbol;Acc:HGNC:4910]	14	61695513	61748259	1
ENSG00000111911	HINT3	0.217155	1.76598	0.861187	0.404777	0.543098	-7.15658	135114	histidine triad nucleotide binding protein 3 [Source:HGNC Symbol;Acc:HGNC:18468]	6	125956781	125980244	1
ENSG00000064393	HIPK2	-2.30953	-0.222721	-7.66197	3.63e-06	4.97e-05	4.54604	28996	homeodomain interacting protein kinase 2 [Source:HGNC Symbol;Acc:HGNC:14402]	7	139561570	139777778	-1
ENSG00000187837	HIST1H1C	-0.173744	0.293353	-0.877422	0.396222	0.535722	-7.09333	3006	histone cluster 1, H1c [Source:HGNC Symbol;Acc:HGNC:4716]	6	26055787	26056428	-1
ENSG00000168298	HIST1H1E	-0.559941	0.741782	-3.29121	0.00586306	0.0189346	-3.31711	3008	histone cluster 1, H1e [Source:HGNC Symbol;Acc:HGNC:4718]	6	26156354	26157107	1
ENSG00000180573	HIST1H2AC	-0.535728	0.493403	-2.7692	0.0159724	0.0419997	-4.29039	8334	histone cluster 1, H2ac [Source:HGNC Symbol;Acc:HGNC:4733]	6	26124145	26139116	1
ENSG00000277075	HIST1H2AE	-0.510238	0.500077	-2.17756	0.0485001	0.103475	-5.35471	3012	histone cluster 1, H2ae [Source:HGNC Symbol;Acc:HGNC:4724]	6	26216975	26217483	1
ENSG00000196787	HIST1H2AG	-0.113476	1.57196	-0.729067	0.478922	0.61333	-7.26479	8969	histone cluster 1, H2ag [Source:HGNC Symbol;Acc:HGNC:4737]	6	27133042	27135291	1
ENSG00000274997	HIST1H2AH	-0.0173865	1.11402	-0.0882675	0.931013	0.958088	-7.54452	85235	histone cluster 1, H2ah [Source:HGNC Symbol;Acc:HGNC:13671]	6	27147129	27147515	1
ENSG00000278677	HIST1H2AM	0.0612866	0.530208	0.291686	0.775141	0.854864	-7.47206	8336	histone cluster 1, H2am [Source:HGNC Symbol;Acc:HGNC:4735]	6	27892757	27893149	-1
ENSG00000180596	HIST1H2BC	-0.925139	0.487131	-4.86439	0.000311285	0.00181037	-0.303075	8347	histone cluster 1, H2bc [Source:HGNC Symbol;Acc:HGNC:4757]	6	26114873	26123926	-1
ENSG00000273802	HIST1H2BG	-0.0190905	1.07595	-0.0834694	0.934753	0.96074	-7.54463	8339	histone cluster 1, H2bg [Source:HGNC Symbol;Acc:HGNC:4746]	6	26215159	26216692	-1
ENSG00000233822	HIST1H2BN	-0.132093	0.560888	-0.750953	0.46609	0.600055	-7.22904	8341	histone cluster 1, H2bn [Source:HGNC Symbol;Acc:HGNC:4749]	6	27837760	27865798	1
ENSG00000274750	HIST1H3E	-0.151814	1.97318	-0.875252	0.397359	0.536273	-7.14137	8353	histone cluster 1, H3e [Source:HGNC Symbol;Acc:HGNC:4769]	6	26224199	26227473	1
ENSG00000278828	HIST1H3H	-0.453035	1.38373	-2.97154	0.0108396	0.0310402	-3.9362	8357	histone cluster 1, H3h [Source:HGNC Symbol;Acc:HGNC:4775]	6	27810064	27811300	1
ENSG00000197153	HIST1H3J	-0.658197	1.59763	-3.38597	0.00488733	0.0162496	-3.13948	8356	histone cluster 1, H3j [Source:HGNC Symbol;Acc:HGNC:4774]	6	27890382	27893106	-1
ENSG00000276966	HIST1H4E	-0.439802	1.47669	-2.34335	0.0357095	0.0807048	-5.09049	8367	histone cluster 1, H4e [Source:HGNC Symbol;Acc:HGNC:4790]	6	26204552	26206038	1
ENSG00000276180	HIST1H4I	-0.60983	1.0095	-3.12994	0.00799454	0.0241639	-3.63431	8294	histone cluster 1, H4i [Source:HGNC Symbol;Acc:HGNC:4793]	6	27138588	27139881	1
ENSG00000203812	HIST2H2AA3	1.34167	2.75786	7.23306	6.71e-06	8.19e-05	3.7053	8337	histone cluster 2, H2aa3 [Source:HGNC Symbol;Acc:HGNC:4736]	1	149842188	149842736	-1
ENSG00000272196	HIST2H2AA4	1.36191	2.77113	7.29368	6.15e-06	7.57e-05	3.79835	723790	histone cluster 2, H2aa4 [Source:HGNC Symbol;Acc:HGNC:29668]	1	149851061	149851624	1
ENSG00000184270	HIST2H2AB	-0.561939	1.34809	-3.18886	0.00713819	0.022019	-3.52281	317772	histone cluster 2, H2ab [Source:HGNC Symbol;Acc:HGNC:20508]	1	149887524	149887916	-1
ENSG00000184678	HIST2H2BE	-0.263859	1.96427	-1.62343	0.128544	0.223912	-6.2518	8349	histone cluster 2, H2be [Source:HGNC Symbol;Acc:HGNC:4760]	1	149884459	149886652	-1
ENSG00000203814	HIST2H2BF	-0.437668	0.668084	-2.32987	0.0366158	0.0823772	-5.10335	440689	histone cluster 2, H2bf [Source:HGNC Symbol;Acc:HGNC:24700]	1	149782689	149812373	-1
ENSG00000203852	HIST2H3A	-0.455494	1.62177	-2.75583	0.0163856	0.0429494	-4.33674	333932	histone cluster 2, H3a [Source:HGNC Symbol;Acc:HGNC:20505]	1	149852619	149854274	1
ENSG00000203811	HIST2H3C	-0.624948	1.52483	-3.87123	0.00193675	0.00751643	-2.20588	126961	histone cluster 2, H3c [Source:HGNC Symbol;Acc:HGNC:20503]	1	149839538	149841193	-1
ENSG00000270882	HIST2H4A	-0.42285	1.83473	-2.51047	0.0261074	0.0628455	-4.78339	8370	histone cluster 2, H4a [Source:HGNC Symbol;Acc:HGNC:4794]	1	149832659	149839767	1
ENSG00000270276	HIST2H4B	-0.413077	1.82913	-2.4655	0.028414	0.0677395	-4.86472	554313	histone cluster 2, H4b [Source:HGNC Symbol;Acc:HGNC:29607]	1	149854045	149861210	-1
ENSG00000197837	HIST4H4	-0.745935	0.658533	-3.91414	0.0017859	0.00703287	-2.11127	121504	histone cluster 4, H4 [Source:HGNC Symbol;Acc:HGNC:20510]	12	14767999	14771131	-1
ENSG00000149948	HMGA2	1.32346	1.52027	6.40967	2.33e-05	0.000222435	2.37196	8091	high mobility group AT-hook 2 [Source:HGNC Symbol;Acc:HGNC:5009]	12	65824131	65966295	1
ENSG00000189403	HMGB1	0.209891	0.474386	1.06319	0.307092	0.442764	-6.92217	3146	high mobility group box 1 [Source:HGNC Symbol;Acc:HGNC:4983]	13	30456704	30617597	-1
ENSG00000029993	HMGB3	0.580934	0.943054	3.46643	0.00418838	0.0142705	-2.96769	3149	high mobility group box 3 [Source:HGNC Symbol;Acc:HGNC:5004]	X	150980509	150990775	1
ENSG00000113161	HMGCR	-0.0270926	1.56918	-0.152391	0.881224	0.9291	-7.53172	3156	3-hydroxy-3-methylglutaryl-CoA reductase [Source:HGNC Symbol;Acc:HGNC:5006]	5	75336329	75362104	1
ENSG00000112972	HMGCS1	-0.0107617	2.33389	-0.0608012	0.952445	0.970605	-7.53647	3157	3-hydroxy-3-methylglutaryl-CoA synthase 1 [Source:HGNC Symbol;Acc:HGNC:5007]	5	43289395	43313512	-1
ENSG00000189159	HN1	-0.617937	0.663348	-3.08761	0.00867251	0.0258817	-3.70232	51155	hematological and neurological expressed 1 [Source:HGNC Symbol;Acc:HGNC:14569]	17	75135248	75168281	-1
ENSG00000177733	HNRNPA0	-0.187168	0.840879	-1.05561	0.310416	0.446257	-6.96993	10949	heterogeneous nuclear ribonucleoprotein A0 [Source:HGNC Symbol;Acc:HGNC:5030]	5	137745651	137754376	-1
ENSG00000135486	HNRNPA1	0.507162	0.775292	2.04186	0.062052	0.12448	-5.58126	3178	heterogeneous nuclear ribonucleoprotein A1 [Source:HGNC Symbol;Acc:HGNC:5031]	12	54280193	54287088	1
ENSG00000122566	HNRNPA2B1	-0.0579258	1.62372	-0.312476	0.759647	0.843551	-7.49121	3181	heterogeneous nuclear ribonucleoprotein A2/B1 [Source:HGNC Symbol;Acc:HGNC:5033]	7	26189927	26201529	-1
ENSG00000170144	HNRNPA3	0.79529	0.277072	3.26321	0.00618726	0.0197753	-3.26107	220988 100616394	heterogeneous nuclear ribonucleoprotein A3 [Source:HGNC Symbol;Acc:HGNC:24941]	2	177212563	177223958	1
ENSG00000092199	HNRNPC	-0.444989	2.54733	-1.84629	0.0877936	0.163877	-5.91151	3183	heterogeneous nuclear ribonucleoprotein C (C1/C2) [Source:HGNC Symbol;Acc:HGNC:5035]	14	21209136	21269494	-1
ENSG00000138668	HNRNPD	0.450344	0.780291	1.84764	0.0875865	0.163614	-5.89809	3184	heterogeneous nuclear ribonucleoprotein D [Source:HGNC Symbol;Acc:HGNC:5036]	4	82352498	82374503	-1
ENSG00000152795	HNRNPDL	0.02835	0.665505	0.17019	0.867487	0.921031	-7.51439	9987	heterogeneous nuclear ribonucleoprotein D like [Source:HGNC Symbol;Acc:HGNC:5037]	4	82422564	82430408	-1
ENSG00000169045	HNRNPH1	0.25639	3.77349	1.10382	0.289732	0.421447	-6.82486	3187	heterogeneous nuclear ribonucleoprotein H1 (H) [Source:HGNC Symbol;Acc:HGNC:5041]	5	179614178	179634784	-1
ENSG00000096746	HNRNPH3	0.273666	0.289951	1.49394	0.159121	0.263289	-6.3684	3189	heterogeneous nuclear ribonucleoprotein H3 [Source:HGNC Symbol;Acc:HGNC:5043]	10	68331174	68343191	1
ENSG00000165119	HNRNPK	0.0676704	11.6592	0.160769	0.874753	0.92503	-6.73003	3190 407043	heterogeneous nuclear ribonucleoprotein K [Source:HGNC Symbol;Acc:HGNC:5044]	9	83968083	83980616	-1
ENSG00000104824	HNRNPL	-0.920769	1.3836	-5.45338	0.000111551	0.000778341	0.730421	3191	heterogeneous nuclear ribonucleoprotein L [Source:HGNC Symbol;Acc:HGNC:5045]	19	38836388	38852347	-1
ENSG00000099783	HNRNPM	0.403254	0.555777	2.01059	0.0656366	0.129962	-5.6167	4670	heterogeneous nuclear ribonucleoprotein M [Source:HGNC Symbol;Acc:HGNC:5046]	19	8444767	8489114	1
ENSG00000153187	HNRNPU	-0.222711	0.959306	-1.08684	0.296895	0.429561	-6.94117	3192	heterogeneous nuclear ribonucleoprotein U [Source:HGNC Symbol;Acc:HGNC:5048]	1	244840638	244864542	-1
ENSG00000152413	HOMER1	0.177893	0.288336	0.815185	0.429684	0.565831	-7.13043	9456	homer scaffolding protein 1 [Source:HGNC Symbol;Acc:HGNC:17512]	5	79372636	79514217	-1
ENSG00000168172	HOOK3	-0.156785	-0.00351712	-0.757238	0.462445	0.596291	-7.13554	84376	hook microtubule tethering protein 3 [Source:HGNC Symbol;Acc:HGNC:23576]	8	42896932	43030539	1
ENSG00000253187	HOXA10-AS	-2.08314	8.75935	-5.92428	5.08e-05	0.000408759	2.00912	100874323	HOXA10 antisense RNA [Source:HGNC Symbol;Acc:HGNC:40281]	7	27168619	27171915	1
ENSG00000078399	HOXA9	-2.08203	8.76092	-5.92048	5.11e-05	0.000409983	2.00285	3205 442920	homeobox A9 [Source:HGNC Symbol;Acc:HGNC:5109]	7	27162435	27175180	-1
ENSG00000182742	HOXB4	-0.895021	16.8756	-1.40055	0.184819	0.294782	-5.42842	3214	homeobox B4 [Source:HGNC Symbol;Acc:HGNC:5115]	17	48575513	48580111	-1
ENSG00000120068	HOXB8	-2.32428	1.45898	-12.8765	9.19e-09	3.91e-07	10.5439	3218	homeobox B8 [Source:HGNC Symbol;Acc:HGNC:5119]	17	48611377	48614939	-1
ENSG00000170689	HOXB9	-1.03736	0.364564	-5.13667	0.000192568	0.0012262	0.210536	3219	homeobox B9 [Source:HGNC Symbol;Acc:HGNC:5120]	17	48621159	48626356	-1
ENSG00000110756	HPS5	0.482976	0.377006	1.90352	0.0794027	0.150829	-5.76288	11234	HPS5, biogenesis of lysosomal organelles complex 2 subunit 2 [Source:HGNC Symbol;Acc:HGNC:17022]	11	18278668	18322198	-1
ENSG00000263390	hsa-mir-3119-1	3.87903	-1.1727	9.28885	4.29e-07	7.75e-06	6.86982		hsa-mir-3119-1 [Source:miRBase;Acc:MI0014134]	1	170151378	170151462	1
ENSG00000283558	hsa-mir-3158-1	-1.26734	5.57583	-4.55879	0.00053979	0.00268486	-0.661856		hsa-mir-3158-1 [Source:miRBase;Acc:MI0014186]	10	101601417	101601497	-1
ENSG00000283237	hsa-mir-550a-1	-0.649192	2.90502	-2.96043	0.0110733	0.0314548	-3.9274		hsa-mir-550a-1 [Source:miRBase;Acc:MI0003600]	7	30289794	30289890	-1
ENSG00000283461	hsa-mir-550a-2	-0.651928	2.90633	-2.9741	0.0107865	0.0309239	-3.90142		hsa-mir-550a-2 [Source:miRBase;Acc:MI0003601]	7	32732981	32733077	-1
ENSG00000080824	HSP90AA1	-0.368283	1.07245	-1.68017	0.116838	0.208057	-6.17964	3320	heat shock protein 90 alpha family class A member 1 [Source:HGNC Symbol;Acc:HGNC:5253]	14	102080738	102139699	-1
ENSG00000096384	HSP90AB1	-0.541892	1.06133	-3.24386	0.00642175	0.0203671	-3.41707	3326	heat shock protein 90 alpha family class B member 1 [Source:HGNC Symbol;Acc:HGNC:5258]	6	44246166	44253888	1
ENSG00000044574	HSPA5	-0.0460073	0.250023	-0.245696	0.809763	0.880116	-7.4516	3309	heat shock protein family A (Hsp70) member 5 [Source:HGNC Symbol;Acc:HGNC:5238]	9	125234853	125241330	-1
ENSG00000109971	HSPA8	-0.715252	5.56725	-3.01289	0.010012	0.0291076	-3.61034	3312	heat shock protein family A (Hsp70) member 8 [Source:HGNC Symbol;Acc:HGNC:5241]	11	123057489	123063230	-1
ENSG00000086758	HUWE1	-0.0439413	0.237407	-0.208702	0.837923	0.904767	-7.45874	10075	HECT, UBA and WWE domain containing 1, E3 ubiquitin protein ligase [Source:HGNC Symbol;Acc:HGNC:30892]	X	53532096	53686729	-1
ENSG00000198331	HYLS1	-0.923782	3.68602	-3.63348	0.00304286	0.0109393	-2.57697	219844	HYLS1, centriolar and ciliogenesis associated [Source:HGNC Symbol;Acc:HGNC:26558]	11	125883614	125900648	1
ENSG00000117318	ID3	-2.31876	-0.0125336	-8.55435	1.08e-06	1.71e-05	5.75631	3399	inhibitor of DNA binding 3, HLH protein [Source:HGNC Symbol;Acc:HGNC:5362]	1	23557918	23559794	-1
ENSG00000067064	IDI1	0.0280503	0.882458	0.153678	0.880229	0.928589	-7.52997	3422	isopentenyl-diphosphate delta isomerase 1 [Source:HGNC Symbol;Acc:HGNC:5387]	10	1039908	1049170	-1
ENSG00000165949	IFI27	0.0202664	0.966406	0.0926766	0.927577	0.955744	-7.54128	3429	interferon alpha inducible protein 27 [Source:HGNC Symbol;Acc:HGNC:5397]	14	94104836	94116698	1
ENSG00000159217	IGF2BP1	0.460061	2.61106	2.36727	0.0341523	0.0787665	-5.02281	10642	insulin like growth factor 2 mRNA binding protein 1 [Source:HGNC Symbol;Acc:HGNC:28866]	17	48997412	49055650	1
ENSG00000129351	ILF3	0.060738	0.714366	0.319705	0.754284	0.839713	-7.47759	3609	interleukin enhancer binding factor 3 [Source:HGNC Symbol;Acc:HGNC:6038]	19	10654261	10692417	1
ENSG00000177971	IMP3	1.04289	0.248458	4.06788	0.00133739	0.00557694	-1.68711	55272	IMP3, U3 small nucleolar ribonucleoprotein [Source:HGNC Symbol;Acc:HGNC:14497]	15	75639085	75648706	-1
ENSG00000178035	IMPDH2	-0.624592	0.335611	-2.49298	0.026982	0.0645744	-4.78039	3615	inosine monophosphate dehydrogenase 2 [Source:HGNC Symbol;Acc:HGNC:6053]	3	49024325	49029408	-1
ENSG00000153487	ING1	0.481716	0.480417	2.32633	0.0368578	0.0828465	-5.06519	3621	inhibitor of growth family member 1 [Source:HGNC Symbol;Acc:HGNC:6062]	13	110712736	110723339	1
ENSG00000114933	INO80D	-0.153859	0.406851	-0.683945	0.506048	0.639531	-7.26315	54891	INO80 complex subunit D [Source:HGNC Symbol;Acc:HGNC:25997]	2	205993721	206086303	-1
ENSG00000148384	INPP5E	-1.09392	1.24803	-4.40713	0.000712374	0.0033999	-1.18451	56623	inositol polyphosphate-5-phosphatase E [Source:HGNC Symbol;Acc:HGNC:21474]	9	136428619	136439823	-1
ENSG00000165458	INPPL1	0.475366	-0.281183	2.14645	0.0513373	0.107674	-5.20844	3636	inositol polyphosphate phosphatase like 1 [Source:HGNC Symbol;Acc:HGNC:6080]	11	72223701	72239105	1
ENSG00000188487	INSC	3.88547	-1.54758	7.8725	2.71e-06	3.85e-05	5.04198	387755	inscuteable homolog (Drosophila) [Source:HGNC Symbol;Acc:HGNC:33116]	11	15112424	15247208	1
ENSG00000186480	INSIG1	-0.257718	0.703286	-1.2622	0.229106	0.349874	-6.73097	3638	insulin induced gene 1 [Source:HGNC Symbol;Acc:HGNC:6083]	7	155297776	155310235	1
ENSG00000108506	INTS2	0.196709	0.0443239	0.783862	0.447202	0.582398	-7.10989	57508	integrator complex subunit 2 [Source:HGNC Symbol;Acc:HGNC:29241]	17	61865367	61928016	-1
ENSG00000102786	INTS6	-0.498649	0.639198	-2.2132	0.0454313	0.0981967	-5.30493	26512	integrator complex subunit 6 [Source:HGNC Symbol;Acc:HGNC:14879]	13	51354077	51454264	-1
ENSG00000165359	INTS6L	0.460099	0.0257873	1.93938	0.0745229	0.143541	-5.64149	203522	integrator complex subunit 6 like [Source:HGNC Symbol;Acc:HGNC:27334]	X	135520659	135582510	1
ENSG00000065150	IPO5	-0.448791	0.569237	-2.43238	0.0302368	0.07078	-4.91376	3843	importin 5 [Source:HGNC Symbol;Acc:HGNC:6402]	13	97953658	98024297	1
ENSG00000205339	IPO7	-0.447554	0.319386	-2.28888	0.03951	0.0877725	-5.14127	10527	importin 7 [Source:HGNC Symbol;Acc:HGNC:9852]	11	9384622	9448126	1
ENSG00000198700	IPO9	-0.0839834	1.1298	-0.441275	0.666282	0.772289	-7.44579	55705	importin 9 [Source:HGNC Symbol;Acc:HGNC:19425]	1	201829141	201884294	1
ENSG00000136381	IREB2	0.429348	0.224443	2.3554	0.0349166	0.0795663	-4.97671	3658	iron responsive element binding protein 2 [Source:HGNC Symbol;Acc:HGNC:6115]	15	78437431	78501456	1
ENSG00000119669	IRF2BPL	-0.541473	0.457921	-2.69721	0.0183238	0.047132	-4.4206	64207	interferon regulatory factor 2 binding protein like [Source:HGNC Symbol;Acc:HGNC:14282]	14	77024543	77028699	-1
ENSG00000182149	IST1	0.309975	-0.127659	1.40607	0.18321	0.29335	-6.39502	9798	IST1, ESCRT-III associated factor [Source:HGNC Symbol;Acc:HGNC:28977]	16	71845996	71931199	1
ENSG00000115232	ITGA4	1.56607	-0.542194	3.65242	0.00293485	0.01059	-2.24753	3676	integrin subunit alpha 4 [Source:HGNC Symbol;Acc:HGNC:6140]	2	181457202	181536187	1
ENSG00000138448	ITGAV	0.879253	-0.0801822	3.49113	0.0039948	0.0136862	-2.74214	3685	integrin subunit alpha V [Source:HGNC Symbol;Acc:HGNC:6150]	2	186590065	186680901	1
ENSG00000116679	IVNS1ABP	-0.175388	0.22811	-0.721738	0.483267	0.617037	-7.20985	10625	influenza virus NS1A binding protein [Source:HGNC Symbol;Acc:HGNC:16951]	1	185296388	185317329	-1
ENSG00000171988	JMJD1C	0.655642	0.461602	3.30736	0.00568391	0.0184281	-3.22572	221037	jumonji domain containing 1C [Source:HGNC Symbol;Acc:HGNC:12313]	10	63167221	63521850	-1
ENSG00000177606	JUN	0.283377	0.0703252	1.36808	0.194527	0.307102	-6.49515	3725	Jun proto-oncogene, AP-1 transcription factor subunit [Source:HGNC Symbol;Acc:HGNC:6204]	1	58780788	58784327	-1
ENSG00000245970	KB-1208A12.3	1.2067	0.167548	4.77603	0.000364542	0.00203337	-0.327183			8	98041726	98044121	1
ENSG00000182674	KCNB2	0.723488	0.244287	2.38167	0.0332467	0.0769647	-4.90813	9312	potassium voltage-gated channel subfamily B member 2 [Source:HGNC Symbol;Acc:HGNC:6232]	8	72537391	72938349	1
ENSG00000174943	KCTD13	0.204696	0.0507615	0.779601	0.44962	0.584318	-7.10858	253980	potassium channel tetramerization domain containing 13 [Source:HGNC Symbol;Acc:HGNC:22234]	16	29905012	29927035	-1
ENSG00000004487	KDM1A	0.300444	-0.318515	1.4016	0.184514	0.294782	-6.34433	23028	lysine demethylase 1A [Source:HGNC Symbol;Acc:HGNC:29079]	1	23019448	23083689	1
ENSG00000173120	KDM2A	-0.00883866	0.106602	-0.0373086	0.970807	0.979906	-7.45422	22992	lysine demethylase 2A [Source:HGNC Symbol;Acc:HGNC:13606]	11	67119269	67258087	1
ENSG00000073614	KDM5A	0.625098	0.177389	3.10665	0.00836073	0.0250721	-3.56147	5927	lysine demethylase 5A [Source:HGNC Symbol;Acc:HGNC:9886]	12	280129	389454	-1
ENSG00000117139	KDM5B	0.51791	1.4229	3.02188	0.00984041	0.0287099	-3.83224	10765	lysine demethylase 5B [Source:HGNC Symbol;Acc:HGNC:18039]	1	202724491	202809470	-1
ENSG00000088247	KHSRP	1.0097	4.08026	3.66273	0.00287775	0.0104213	-2.48626	8570 100500888	KH-type splicing regulatory protein [Source:HGNC Symbol;Acc:HGNC:6316]	19	6413348	6424794	-1
ENSG00000170871	KIAA0232	0.707771	-0.0781751	3.58002	0.00336995	0.011959	-2.58199	9778	KIAA0232 [Source:HGNC Symbol;Acc:HGNC:28992]	4	6781375	6884170	1
ENSG00000100890	KIAA0391	0.169124	-0.0791662	0.914596	0.377096	0.516059	-6.96996	9692	KIAA0391 [Source:HGNC Symbol;Acc:HGNC:19958]	14	35121846	35277614	1
ENSG00000136051	KIAA1033	0.914768	-0.0701703	3.82546	0.00211205	0.00806092	-2.09216	23325	KIAA1033 [Source:HGNC Symbol;Acc:HGNC:29174]	12	105107324	105169134	1
ENSG00000183354	KIAA2026	-2.4395	0.954902	-12.1109	1.92e-08	7.21e-07	9.80589	158358	KIAA2026 [Source:HGNC Symbol;Acc:HGNC:23378]	9	5881596	6007901	-1
ENSG00000079616	KIF22	-0.131412	0.116146	-0.661429	0.519917	0.654055	-7.23127	3835	kinesin family member 22 [Source:HGNC Symbol;Acc:HGNC:6391]	16	29790719	29805385	1
ENSG00000170759	KIF5B	-0.428289	0.508449	-1.81108	0.0933454	0.172678	-5.95437	3799	kinesin family member 5B [Source:HGNC Symbol;Acc:HGNC:6324]	10	32009010	32056431	-1
ENSG00000116014	KISS1R	-2.67887	0.263962	-10.8785	6.88e-08	1.84e-06	8.58114	84634	KISS1 receptor [Source:HGNC Symbol;Acc:HGNC:4510]	19	917287	921015	1
ENSG00000126214	KLC1	-0.602325	0.830944	-3.5306	0.00370403	0.0128708	-2.8595	3831	kinesin light chain 1 [Source:HGNC Symbol;Acc:HGNC:6387]	14	103561896	103714249	1
ENSG00000162413	KLHL21	0.81211	-0.373612	3.74688	0.00245178	0.00914618	-2.17779	9903	kelch like family member 21 [Source:HGNC Symbol;Acc:HGNC:29041]	1	6590724	6614607	-1
ENSG00000118058	KMT2A	-0.546695	0.194844	-2.74929	0.0165914	0.0432598	-4.28897	4297	lysine methyltransferase 2A [Source:HGNC Symbol;Acc:HGNC:7132]	11	118436490	118526832	1
ENSG00000167548	KMT2D	-0.296959	4.91298	-1.21099	0.247506	0.371559	-6.61039	8085	lysine methyltransferase 2D [Source:HGNC Symbol;Acc:HGNC:7133]	12	49018975	49059774	-1
ENSG00000184445	KNTC1	0.977522	-0.0159049	4.28805	0.000887405	0.00404807	-1.22489	9735	kinetochore associated 1 [Source:HGNC Symbol;Acc:HGNC:17255]	12	122527246	122626396	1
ENSG00000182481	KPNA2	0.11411	0.309425	0.490283	0.632124	0.745961	-7.36049	3838	karyopherin subunit alpha 2 [Source:HGNC Symbol;Acc:HGNC:6395]	17	68035519	68046842	1
ENSG00000108424	KPNB1	0.0384787	1.15295	0.175552	0.863357	0.917433	-7.53158	3837	karyopherin subunit beta 1 [Source:HGNC Symbol;Acc:HGNC:6400]	17	47649476	47685505	1
ENSG00000235716	KRT18P46	0.0659625	2.41421	0.322753	0.752027	0.8385	-7.48019		keratin 18 pseudogene 46 [Source:HGNC Symbol;Acc:HGNC:33416]	2	161580072	161581350	1
ENSG00000135862	LAMC1	0.59873	0.775372	2.58031	0.0228794	0.0565592	-4.63464	3915	laminin subunit gamma 1 [Source:HGNC Symbol;Acc:HGNC:6492]	1	183023460	183145592	1
ENSG00000149357	LAMTOR1	-0.0929246	0.653891	-0.296886	0.771255	0.850958	-7.48408	55004	late endosomal/lysosomal adaptor, MAPK and MTOR activator 1 [Source:HGNC Symbol;Acc:HGNC:26068]	11	72085895	72103387	-1
ENSG00000155506	LARP1	-0.400389	0.934396	-2.10651	0.0552075	0.114386	-5.49965	23367	La ribonucleoprotein domain family member 1 [Source:HGNC Symbol;Acc:HGNC:29531]	5	154712902	154817607	1
ENSG00000162194	LBHD1	-0.365532	1.19246	-2.02835	0.0635784	0.12648	-5.63361	79081	LBH domain containing 1 [Source:HGNC Symbol;Acc:HGNC:28351]	11	62662817	62672255	-1
ENSG00000196233	LCOR	-0.355796	0.601251	-1.9586	0.072022	0.14003	-5.72791	26148 84458	ligand dependent nuclear receptor corepressor [Source:HGNC Symbol;Acc:HGNC:29503]	10	96832260	96995959	1
ENSG00000111716	LDHB	0.371789	0.259992	1.9007	0.0797988	0.151465	-5.75219	3945	lactate dehydrogenase B [Source:HGNC Symbol;Acc:HGNC:6541]	12	21635342	21757857	-1
ENSG00000130164	LDLR	0.317889	2.20769	1.97444	0.0700185	0.136671	-5.71002	3949 102465534	low density lipoprotein receptor [Source:HGNC Symbol;Acc:HGNC:6547]	19	11089362	11133816	1
ENSG00000167615	LENG8	0.846357	0.416274	3.05563	0.00922242	0.0271628	-3.68663	114823	leukocyte receptor cluster member 8 [Source:HGNC Symbol;Acc:HGNC:15500]	19	54448887	54462037	1
ENSG00000230530	LIMD1-AS1	0.790878	1.88093	4.30991	0.000852228	0.00393893	-1.36434		LIMD1 antisense RNA 1 [Source:HGNC Symbol;Acc:HGNC:44107]	3	45679043	45689134	-1
ENSG00000178977	LINC00324	0.0731494	4.85652	0.278256	0.785203	0.861359	-7.31796	284029	long intergenic non-protein coding RNA 324 [Source:HGNC Symbol;Acc:HGNC:26628]	17	8220642	8224043	-1
ENSG00000245526	LINC00461	5.05076	10.2783	10.9659	6.26e-08	1.74e-06	8.73019	407047 645323	long intergenic non-protein coding RNA 461 [Source:HGNC Symbol;Acc:HGNC:42810]	5	88507546	88691041	-1
ENSG00000253230	LINC00599	-2.57454	2.10376	-10.8468	7.12e-08	1.88e-06	8.42717	157627 406907	long intergenic non-protein coding RNA 599 [Source:HGNC Symbol;Acc:HGNC:27231]	8	9900064	9905366	-1
ENSG00000225163	LINC00618	0.0337314	1.14657	0.126453	0.901313	0.940661	-7.53948		long intergenic non-protein coding RNA 618 [Source:HGNC Symbol;Acc:HGNC:20110]	14	96943579	96945394	1
ENSG00000226067	LINC00623	0.621666	4.39605	2.15313	0.0507158	0.106736	-5.27125		long intergenic non-protein coding RNA 623 [Source:HGNC Symbol;Acc:HGNC:44252]	1	120913275	121009291	1
ENSG00000232677	LINC00665	-1.26433	0.820848	-4.77757	0.000363536	0.00203269	-0.478809	100506930	long intergenic non-protein coding RNA 665 [Source:HGNC Symbol;Acc:HGNC:44323]	19	36313067	36331718	-1
ENSG00000281852	LINC00891	-0.250195	0.613045	-1.27303	0.225355	0.34628	-6.71142		long intergenic non-protein coding RNA 891 [Source:HGNC Symbol;Acc:HGNC:48577]	X	71697196	71706455	1
ENSG00000188825	LINC00910	1.38578	1.37576	5.72205	7.1e-05	0.000537568	1.22137		long intergenic non-protein coding RNA 910 [Source:HGNC Symbol;Acc:HGNC:44361]	17	43369845	43389199	-1
ENSG00000212694	LINC01089	0.0908605	-0.0264688	0.383852	0.707308	0.804039	-7.34245	338799	long intergenic non-protein coding RNA 1089 [Source:HGNC Symbol;Acc:HGNC:27886]	12	121795267	121803906	-1
ENSG00000231817	LINC01198	6.18667	-1.36191	16.8554	3.37e-10	2.61e-08	13.5228		long intergenic non-protein coding RNA 1198 [Source:HGNC Symbol;Acc:HGNC:49598]	13	46455135	46486506	-1
ENSG00000234722	LINC01287	-0.0267348	2.28877	-0.118818	0.907241	0.943456	-7.53163	103724390	long intergenic non-protein coding RNA 1287 [Source:HGNC Symbol;Acc:HGNC:50351]	7	153399920	153413963	-1
ENSG00000259417	LINC01314	4.30021	2.55681	19.094	7.09e-11	7.31e-09	15.4633		long intergenic non-protein coding RNA 1314 [Source:HGNC Symbol;Acc:HGNC:50507]	15	80195484	80252213	-1
ENSG00000221949	LINC01465	-0.286402	2.86134	-1.65226	0.122474	0.215614	-6.19148		long intergenic non-protein coding RNA 1465 [Source:HGNC Symbol;Acc:HGNC:26364]	12	62601751	62603690	-1
ENSG00000272888	LINC01578	-0.576378	0.404697	-2.80718	0.0148539	0.0398626	-4.20995		long intergenic non-protein coding RNA 1578 [Source:HGNC Symbol;Acc:HGNC:48626]	15	92882707	92899701	1
ENSG00000225595	LINC01623	-0.324643	1.0894	-1.45486	0.169483	0.277102	-6.49835		long intergenic non-protein coding RNA 1623 [Source:HGNC Symbol;Acc:HGNC:52050]	6	28859625	28864630	-1
ENSG00000239407	LL0XNC01-237H1.2	2.35709	1.12583	3.91505	0.00178282	0.0070319	-2.01532			X	102884414	102906158	1
ENSG00000224086	LL22NC03-86G7.1	-0.490777	0.666714	-2.71657	0.01766	0.0455666	-4.40221			22	21938293	21977632	1
ENSG00000273734	LLfos-48D6.2	3.12032	2.34998	4.73999	0.000388913	0.00213128	-0.486379			19	2269525	2341172	1
ENSG00000113368	LMNB1	-0.478091	0.509209	-2.04175	0.062064	0.12448	-5.58426	4001	lamin B1 [Source:HGNC Symbol;Acc:HGNC:6637]	5	126776623	126837020	1
ENSG00000176619	LMNB2	-0.0218022	0.642383	-0.124316	0.902971	0.941751	-7.52104	84823 102466806	lamin B2 [Source:HGNC Symbol;Acc:HGNC:6638]	19	2427638	2456996	-1
ENSG00000113441	LNPEP	-0.86343	2.24343	-4.57001	0.000528881	0.00264654	-0.866601	4012	leucyl and cystinyl aminopeptidase [Source:HGNC Symbol;Acc:HGNC:6656]	5	96935394	97037515	1
ENSG00000064547	LPAR2	0.337718	1.92568	1.6264	0.127907	0.223273	-6.25204	9170	lysophosphatidic acid receptor 2 [Source:HGNC Symbol;Acc:HGNC:3168]	19	19623668	19628930	-1
ENSG00000145012	LPP	-0.0441639	-0.0811206	-0.192517	0.850319	0.910216	-7.39593	4026	LIM domain containing preferred translocation partner in lipoma [Source:HGNC Symbol;Acc:HGNC:6679]	3	188153284	188890671	1
ENSG00000081479	LRP2	4.96615	-1.66197	10.5075	1.03e-07	2.51e-06	8.2595	4036	LDL receptor related protein 2 [Source:HGNC Symbol;Acc:HGNC:6694]	2	169127109	169362685	-1
ENSG00000175061	LRRC75A-AS1	0.0628502	9.49888	0.0730085	0.942913	0.965521	-6.91768	125144	LRRC75A antisense RNA 1 [Source:HGNC Symbol;Acc:HGNC:28619]	17	16438822	16478678	1
ENSG00000161036	LRWD1	-1.00068	0.777983	-4.26546	0.000925326	0.00412822	-1.44282	222229 100616367 100847073	leucine rich repeats and WD repeat domain containing 1 [Source:HGNC Symbol;Acc:HGNC:21769]	7	102464929	102473168	1
ENSG00000160285	LSS	0.285224	0.656989	1.389	0.188225	0.298868	-6.55611	4047	lanosterol synthase (2,3-oxidosqualene-lanosterol cyclase) [Source:HGNC Symbol;Acc:HGNC:6708]	21	46188141	46228824	-1
ENSG00000146963	LUC7L2	0.498242	0.462974	2.68841	0.0186332	0.047779	-4.40554	51631	LUC7 like 2, pre-mRNA splicing factor [Source:HGNC Symbol;Acc:HGNC:21608]	7	139340359	139423457	1
ENSG00000108848	LUC7L3	0.642404	0.196582	2.12335	0.0535434	0.111399	-5.34849	51747	LUC7 like 3 pre-mRNA splicing factor [Source:HGNC Symbol;Acc:HGNC:24309]	17	50719544	50756213	1
ENSG00000124466	LYPD3	1.17747	5.86501	3.73696	0.00249845	0.00927836	-2.18843	27076	LY6/PLAUR domain containing 3 [Source:HGNC Symbol;Acc:HGNC:24880]	19	43460787	43465660	-1
ENSG00000127603	MACF1	-0.366284	0.843452	-1.71628	0.109885	0.198098	-6.12045	23499 643314	microtubule-actin crosslinking factor 1 [Source:HGNC Symbol;Acc:HGNC:13664]	1	39081316	39487177	1
ENSG00000116670	MAD2L2	-0.94442	0.845541	-5.5618	9.28e-05	0.000668419	0.928161	10459	MAD2 mitotic arrest deficient-like 2 (yeast) [Source:HGNC Symbol;Acc:HGNC:6764]	1	11674480	11691650	-1
ENSG00000198042	MAK16	0.468702	0.29159	1.68442	0.116001	0.207013	-6.08124	84549	MAK16 homolog [Source:HGNC Symbol;Acc:HGNC:13703]	8	33484750	33501260	1
ENSG00000251562	MALAT1	0.120755	3.30565	0.656247	0.523139	0.655115	-7.25993	378938	metastasis associated lung adenocarcinoma transcript 1 (non-protein coding) [Source:HGNC Symbol;Acc:HGNC:29665]	11	65497762	65506516	1
ENSG00000161021	MAML1	0.0925417	-0.161883	0.399569	0.695977	0.796062	-7.29951	9794	mastermind like transcriptional coactivator 1 [Source:HGNC Symbol;Acc:HGNC:13632]	5	179732850	179796511	1
ENSG00000184384	MAML2	0.872548	1.65042	4.83421	0.000328502	0.00187921	-0.382774	84441	mastermind like transcriptional coactivator 2 [Source:HGNC Symbol;Acc:HGNC:16259]	11	95976598	96343180	-1
ENSG00000196782	MAML3	1.522	-0.758139	4.95475	0.000265133	0.00161323	0.245906	55534	mastermind like transcriptional coactivator 3 [Source:HGNC Symbol;Acc:HGNC:16272]	4	139716753	140154184	-1
ENSG00000131711	MAP1B	-1.12637	0.607036	-5.93134	5.02e-05	0.000405386	1.58352	4131	microtubule associated protein 1B [Source:HGNC Symbol;Acc:HGNC:6836]	5	72107234	72209570	1
ENSG00000140941	MAP1LC3B	0.615971	6.03059	2.43204	0.0302559	0.07078	-4.63612	81631	microtubule associated protein 1 light chain 3 beta [Source:HGNC Symbol;Acc:HGNC:13352]	16	87383995	87404779	1
ENSG00000095015	MAP3K1	0.987848	0.358974	4.49863	0.000602389	0.00293147	-0.904914	4214	mitogen-activated protein kinase kinase kinase 1 [Source:HGNC Symbol;Acc:HGNC:6848]	5	56815574	56896152	1
ENSG00000006062	MAP3K14	-0.306227	0.582628	-1.45129	0.170458	0.277962	-6.48191	9020	mitogen-activated protein kinase kinase kinase 14 [Source:HGNC Symbol;Acc:HGNC:6853]	17	45263121	45317040	-1
ENSG00000071054	MAP4K4	-0.383747	2.41556	-1.99209	0.0678474	0.133168	-5.67987	9448	mitogen-activated protein kinase kinase kinase kinase 4 [Source:HGNC Symbol;Acc:HGNC:6866]	2	101696850	101894689	1
ENSG00000012983	MAP4K5	1.24255	-0.220764	4.37986	0.00074903	0.00355431	-0.969287	11183	mitogen-activated protein kinase kinase kinase kinase 5 [Source:HGNC Symbol;Acc:HGNC:6867]	14	50418501	50561126	-1
ENSG00000116871	MAP7D1	-0.0929842	0.0902135	-0.515091	0.615156	0.730461	-7.31473	55700	MAP7 domain containing 1 [Source:HGNC Symbol;Acc:HGNC:25514]	1	36155579	36180849	1
ENSG00000100030	MAPK1	0.209535	0.467792	1.16522	0.264915	0.390592	-6.81091	5594	mitogen-activated protein kinase 1 [Source:HGNC Symbol;Acc:HGNC:6871]	22	21754500	21867680	-1
ENSG00000277443	MARCKS	-0.0936345	0.0615623	-0.335094	0.742913	0.832088	-7.39073	4082	myristoylated alanine rich protein kinase C substrate [Source:HGNC Symbol;Acc:HGNC:6759]	6	113857362	113863471	1
ENSG00000166986	MARS	0.0384812	1.07502	0.206584	0.839543	0.905094	-7.52471	4141 102465454	methionyl-tRNA synthetase [Source:HGNC Symbol;Acc:HGNC:6898]	12	57475445	57517569	1
ENSG00000274072	mascRNA-menRNA	0.840538	0.457465	2.84186	0.0139001	0.0376701	-4.09807		MALAT1-associated small cytoplasmic RNA/MEN beta RNA [Source:RFAM;Acc:RF01684]	11	65506117	65506173	1
ENSG00000168906	MAT2A	0.489176	1.36704	3.06683	0.00902594	0.0267752	-3.74624	4144	methionine adenosyltransferase 2A [Source:HGNC Symbol;Acc:HGNC:6904]	2	85539165	85545280	1
ENSG00000280987	MATR3	0.621979	2.03612	2.83308	0.0141357	0.0382669	-4.19006	9782	matrin 3 [Source:EntrezGene;Acc:9782]	5	139273752	139331677	1
ENSG00000015479	MATR3	0.0297074	0.611209	0.164026	0.87224	0.924492	-7.51156	9782	matrin 3 [Source:HGNC Symbol;Acc:HGNC:6912]	5	139293648	139331359	1
ENSG00000103495	MAZ	-0.0412796	0.535483	-0.23916	0.81472	0.884339	-7.48997	4150	MYC associated zinc finger protein [Source:HGNC Symbol;Acc:HGNC:6914]	16	29806106	29811164	1
ENSG00000071655	MBD3	0.017928	0.549542	0.0874189	0.931674	0.958371	-7.51632	53615	methyl-CpG binding domain protein 3 [Source:HGNC Symbol;Acc:HGNC:6918]	19	1573596	1592801	-1
ENSG00000076706	MCAM	5.10572	-0.603699	10.6211	9.11e-08	2.28e-06	8.38091	4162 102465453	melanoma cell adhesion molecule [Source:HGNC Symbol;Acc:HGNC:6934]	11	119308529	119321521	-1
ENSG00000143384	MCL1	-0.298295	0.857322	-1.4558	0.169229	0.277052	-6.4916	4170	BCL2 family apoptosis regulator [Source:HGNC Symbol;Acc:HGNC:6943]	1	150574551	150579738	-1
ENSG00000112118	MCM3	0.606413	-0.178545	2.44746	0.0293931	0.0695103	-4.69842	4172	minichromosome maintenance complex component 3 [Source:HGNC Symbol;Acc:HGNC:6945]	6	52264009	52284881	-1
ENSG00000166508	MCM7	0.229503	0.687148	1.20924	0.248155	0.372082	-6.78156	4176	minichromosome maintenance complex component 7 [Source:HGNC Symbol;Acc:HGNC:6950]	7	100092728	100101940	-1
ENSG00000111877	MCM9	0.110032	0.135432	0.610013	0.552393	0.680397	-7.25853	254394	minichromosome maintenance 9 homologous recombination repair factor [Source:HGNC Symbol;Acc:HGNC:21484]	6	118813442	118935162	-1
ENSG00000135679	MDM2	-0.396191	0.459379	-1.68736	0.115424	0.206132	-6.13741	4193	MDM2 proto-oncogene [Source:HGNC Symbol;Acc:HGNC:6973]	12	68808176	68850686	1
ENSG00000123066	MED13L	0.367905	1.87255	2.00752	0.0659996	0.130368	-5.66081	23389	mediator complex subunit 13 like [Source:HGNC Symbol;Acc:HGNC:22962]	12	115953872	116277338	-1
ENSG00000145794	MEGF10	2.06642	-0.0659866	9.4504	3.52e-07	6.66e-06	6.96677	84466	multiple EGF like domains 10 [Source:HGNC Symbol;Acc:HGNC:29634]	5	127290831	127465737	1
ENSG00000146834	MEPCE	-0.0365604	0.587595	-0.2216	0.828077	0.895306	-7.49907	56257	methylphosphate capping enzyme [Source:HGNC Symbol;Acc:HGNC:20247]	7	100428790	100434126	1
ENSG00000106484	MEST	-2.57087	0.105944	-9.34444	4.01e-07	7.41e-06	6.78558	4232	mesoderm specific transcript [Source:HGNC Symbol;Acc:HGNC:7028]	7	130486171	130506296	1
ENSG00000278771	Metazoa_SRP	0.0935041	1.98393	0.595369	0.561843	0.688953	-7.35523		Metazoan signal recognition particle RNA [Source:RFAM;Acc:RF00017]	14	49853616	49853914	-1
ENSG00000176845	METRNL	0.308326	0.094213	1.43392	0.175266	0.283933	-6.40959	284207	meteorin like, glial cell differentiation regulator [Source:HGNC Symbol;Acc:HGNC:27584]	17	83079691	83095119	1
ENSG00000214756	METTL12	-0.248846	2.1786	-0.620357	0.545771	0.673915	-7.33635	751071	methyltransferase like 12 [Source:HGNC Symbol;Acc:HGNC:33113]	11	62665309	62668496	1
ENSG00000254726	MEX3A	0.466246	0.0869788	2.20317	0.0462757	0.0996497	-5.21189	92312	mex-3 RNA binding family member A [Source:HGNC Symbol;Acc:HGNC:33482]	1	156072013	156081998	-1
ENSG00000092931	MFSD11	-0.0240668	1.67962	-0.116814	0.908797	0.944249	-7.5356	79157	major facilitator superfamily domain containing 11 [Source:HGNC Symbol;Acc:HGNC:25458]	17	76735865	76781449	1
ENSG00000197530	MIB2	-0.224978	0.340468	-1.2332	0.239387	0.362224	-6.73105	142678	mindbomb E3 ubiquitin protein ligase 2 [Source:HGNC Symbol;Acc:HGNC:30577]	1	1615415	1630610	1
ENSG00000243156	MICAL3	1.11599	-0.427894	4.21097	0.00102385	0.00444926	-1.25665	57553	microtubule associated monooxygenase, calponin and LIM domain containing 3 [Source:HGNC Symbol;Acc:HGNC:24694]	22	17787649	18024559	-1
ENSG00000167470	MIDN	-0.412782	0.437112	-2.37457	0.0336904	0.0778707	-5.00451	90007	midnolin [Source:HGNC Symbol;Acc:HGNC:16298]	19	1248553	1259140	1
ENSG00000207994	MIR100	1.10348	12.0421	2.12576	0.05331	0.111152	-4.65884	406892	microRNA 100 [Source:HGNC Symbol;Acc:HGNC:31487]	11	122152229	122152308	-1
ENSG00000199135	MIR101-1	1.94665	9.91809	4.6364	0.000468842	0.00243464	-0.170855	406893	microRNA 101-1 [Source:HGNC Symbol;Acc:HGNC:31488]	1	65058434	65058508	-1
ENSG00000199065	MIR101-2	1.94219	9.9454	4.62282	0.000480525	0.00247971	-0.193968	406894	microRNA 101-2 [Source:HGNC Symbol;Acc:HGNC:31489]	9	4850297	4850375	1
ENSG00000199035	MIR103A1	0.531393	13.3211	0.96558	0.351917	0.490642	-6.14139	406895	microRNA 103a-1 [Source:HGNC Symbol;Acc:HGNC:31490]	5	168560896	168560973	-1
ENSG00000199024	MIR103A2	0.539214	13.3284	0.978889	0.345544	0.485215	-6.1281	406896	microRNA 103a-2 [Source:HGNC Symbol;Acc:HGNC:31491]	20	3917494	3917571	1
ENSG00000283612	MIR103B1	0.531312	13.321	0.965436	0.351986	0.490642	-6.14153	100302238	microRNA 103b-1 [Source:HGNC Symbol;Acc:HGNC:35384]	5	168560904	168560965	1
ENSG00000283320	MIR103B2	0.539214	13.3279	0.978884	0.345547	0.485215	-6.12814	100302282	microRNA 103b-2 [Source:HGNC Symbol;Acc:HGNC:35385]	20	3917502	3917563	-1
ENSG00000207957	MIR105-1	-4.56497	1.79977	-20.9711	2.18e-11	3.91e-09	16.6025	406897	microRNA 105-1 [Source:HGNC Symbol;Acc:HGNC:31492]	X	152392219	152392299	-1
ENSG00000207818	MIR105-2	-4.61682	1.7477	-20.6736	2.61e-11	3.91e-09	16.4237	406898	microRNA 105-2 [Source:HGNC Symbol;Acc:HGNC:31493]	X	152394412	152394492	-1
ENSG00000208036	MIR106B	0.58845	12.069	1.26886	0.226792	0.348057	-5.90634	406900	microRNA 106b [Source:HGNC Symbol;Acc:HGNC:31495]	7	100093993	100094074	-1
ENSG00000198997	MIR107	1.04811	9.26276	2.53597	0.0248808	0.0604464	-4.15759	406901	microRNA 107 [Source:HGNC Symbol;Acc:HGNC:31496]	10	89592747	89592827	-1
ENSG00000257178	MIR10A	-0.895022	16.8756	-1.40055	0.184819	0.294782	-5.42841	406902	microRNA 10a [Source:HGNC Symbol;Acc:HGNC:31497]	17	48579630	48582259	-1
ENSG00000207744	MIR10B	-2.87749	16.2577	-4.86206	0.000312577	0.00181324	0.500284	406903	microRNA 10b [Source:HGNC Symbol;Acc:HGNC:31498]	2	176150303	176150412	1
ENSG00000199017	MIR1-1	-2.20449	2.83293	-10.9667	6.25e-08	1.74e-06	8.58135	406904	microRNA 1-1 [Source:HGNC Symbol;Acc:HGNC:31499]	20	62554306	62554376	1
ENSG00000221540	MIR1180	-0.089723	8.16571	-0.280743	0.783336	0.861038	-6.99892	100302256	microRNA 1180 [Source:HGNC Symbol;Acc:HGNC:35261]	17	19344506	19344574	-1
ENSG00000207778	MIR122	-2.78432	1.66591	-12.4323	1.4e-08	5.7e-07	10.1107	100616357	microRNA 122 [Source:HGNC Symbol;Acc:HGNC:31501]	18	58451080	58451152	-1
ENSG00000267391	MIR122	-2.76594	1.67493	-12.2142	1.74e-08	6.93e-07	9.89053	406906	microRNA 122 [Source:HGNC Symbol;Acc:HGNC:31501]	18	58446275	58453766	1
ENSG00000221585	MIR1226	0.604031	6.03042	2.23892	0.0433306	0.0943926	-4.97566	100302232	microRNA 1226 [Source:HGNC Symbol;Acc:HGNC:33922]	3	47849555	47849629	1
ENSG00000221411	MIR1227	0.252402	3.08682	1.09201	0.2947	0.427384	-6.88935	100302283	microRNA 1227 [Source:HGNC Symbol;Acc:HGNC:33932]	19	2234062	2234149	-1
ENSG00000221394	MIR1229	0.754924	0.962085	3.89504	0.00185148	0.00722242	-2.13627	100302156	microRNA 1229 [Source:HGNC Symbol;Acc:HGNC:33924]	5	179798278	179798346	-1
ENSG00000207816	MIR124-2	-2.62814	2.18366	-11.537	3.43e-08	1.14e-06	9.18744	406908	microRNA 124-2 [Source:HGNC Symbol;Acc:HGNC:31503]	8	64379149	64379257	1
ENSG00000283193	MIR1243	0.681055	-0.217241	2.02961	0.0634343	0.126381	-5.4067	100302188	microRNA 1243 [Source:HGNC Symbol;Acc:HGNC:35304]	4	113106863	113106955	1
ENSG00000207598	MIR124-3	-2.65928	2.11438	-11.258	4.59e-08	1.42e-06	8.88503	406909	microRNA 124-3 [Source:HGNC Symbol;Acc:HGNC:31504]	20	63178500	63178586	1
ENSG00000283203	MIR1246	-1.47893	1.34399	-5.98524	4.6e-05	0.000383757	1.65629	100302142	microRNA 1246 [Source:HGNC Symbol;Acc:HGNC:35312]	2	176600980	176601052	-1
ENSG00000221598	MIR1249	-0.162805	2.80427	-0.69043	0.502095	0.635833	-7.27235	100302149	microRNA 1249 [Source:HGNC Symbol;Acc:HGNC:35315]	22	45200954	45201019	-1
ENSG00000221025	MIR1250	-1.77446	2.40296	-6.38407	2.43e-05	0.000228923	2.34028	100302229	microRNA 1250 [Source:HGNC Symbol;Acc:HGNC:35316]	17	81133196	81133308	-1
ENSG00000221479	MIR1251	-9.08534	0.300495	-14.0387	3.21e-09	1.66e-07	11.5031	100302289	microRNA 1251 [Source:HGNC Symbol;Acc:HGNC:35317]	12	97491909	97491978	1
ENSG00000221184	MIR1254-1	-0.480795	1.46365	-2.0718	0.0587897	0.11946	-5.55824	100302273	microRNA 1254-1 [Source:HGNC Symbol;Acc:HGNC:35319]	10	68759318	68759414	1
ENSG00000264574	MIR1254-2	-0.519341	1.46641	-2.24529	0.0428245	0.0934593	-5.26278	100616217	microRNA 1254-2 [Source:HGNC Symbol;Acc:HGNC:41770]	10	23393405	23393467	1
ENSG00000221265	MIR1255A	-1.33373	2.43119	-6.36491	2.51e-05	0.000234991	2.30444	100302193	microRNA 1255a [Source:HGNC Symbol;Acc:HGNC:35320]	4	101330302	101330414	-1
ENSG00000208008	MIR125A	-3.76061	8.43045	-8.90784	6.89e-07	1.15e-05	6.36809	406910	microRNA 125a [Source:HGNC Symbol;Acc:HGNC:31505]	19	51693254	51693339	1
ENSG00000207971	MIR125B1	-1.78548	8.55319	-4.53985	0.000558731	0.00274795	-0.447585	406911	microRNA 125b-1 [Source:HGNC Symbol;Acc:HGNC:31506]	11	122099757	122099844	-1
ENSG00000207863	MIR125B2	-1.17344	9.16079	-2.93806	0.0115592	0.0323893	-3.42838	406912	microRNA 125b-2 [Source:HGNC Symbol;Acc:HGNC:31507]	21	16590237	16590325	1
ENSG00000199161	MIR126	0.182834	6.17024	0.587836	0.566738	0.691873	-7.0501	406913	microRNA 126 [Source:HGNC Symbol;Acc:HGNC:31508]	9	136670602	136670686	1
ENSG00000266192	MIR1260B	0.906278	1.51018	4.67597	0.000436471	0.0023052	-0.673232	100422991	microRNA 1260b [Source:HGNC Symbol;Acc:HGNC:38258]	11	96341438	96341526	1
ENSG00000221203	MIR1262	-0.375008	3.28655	-1.74316	0.10495	0.190868	-6.02558	100302279	microRNA 1262 [Source:HGNC Symbol;Acc:HGNC:35328]	1	68183518	68183610	-1
ENSG00000221563	MIR1269A	0.369524	10.0144	0.932122	0.368304	0.507673	-6.42795	100302177	microRNA 1269a [Source:HGNC Symbol;Acc:HGNC:35337]	4	66276824	66276928	1
ENSG00000207608	MIR127	-4.0573	-0.39279	-9.8891	2.09e-07	4.21e-06	7.5681	406914	microRNA 127 [Source:HGNC Symbol;Acc:HGNC:31509]	14	100882979	100883075	1
ENSG00000238517	MIR1270	-0.358024	1.82174	-1.41943	0.179361	0.288526	-6.53508	100302179	microRNA 1270 [Source:HGNC Symbol;Acc:HGNC:35338]	19	20399272	20399354	-1
ENSG00000221464	MIR1271	-1.04519	5.78478	-2.90198	0.0123875	0.034399	-3.79838	100302203	microRNA 1271 [Source:HGNC Symbol;Acc:HGNC:35252]	5	176367946	176368031	1
ENSG00000221033	MIR1272	0.0239752	0.429467	0.126577	0.901217	0.940661	-7.49896	100302184	microRNA 1272 [Source:HGNC Symbol;Acc:HGNC:35339]	15	64762387	64762515	-1
ENSG00000221634	MIR1276	-1.4777	3.12142	-5.41846	0.000118391	0.000816867	0.715663	100302121	microRNA 1276 [Source:HGNC Symbol;Acc:HGNC:35347]	15	85770496	85770578	-1
ENSG00000221680	MIR1278	-1.21862	2.76322	-4.87147	0.000307382	0.00180426	-0.293243	100302163	microRNA 1278 [Source:HGNC Symbol;Acc:HGNC:35356]	1	193136503	193136583	1
ENSG00000207654	MIR128-1	-0.85771	10.6716	-2.16379	0.0497371	0.105298	-4.69886	406915	microRNA 128-1 [Source:HGNC Symbol;Acc:HGNC:31510]	2	135665397	135665478	1
ENSG00000207625	MIR128-2	-0.809299	10.3598	-2.0946	0.0564135	0.115964	-4.83878	406916	microRNA 128-2 [Source:HGNC Symbol;Acc:HGNC:31511]	3	35744476	35744559	1
ENSG00000221039	MIR1286	-0.322898	1.12105	-1.14659	0.272267	0.399529	-6.87902	100302118	microRNA 1286 [Source:HGNC Symbol;Acc:HGNC:35279]	22	20249134	20249211	-1
ENSG00000281842	MIR1291	0.49041	3.96045	0.415372	0.68466	0.786962	-7.34196	100302221	microRNA 1291 [Source:HGNC Symbol;Acc:HGNC:35284]	12	48654444	48654530	-1
ENSG00000207705	MIR129-1	-1.42509	6.1567	-5.16711	0.000182616	0.0011749	0.501959	406917	microRNA 129-1 [Source:HGNC Symbol;Acc:HGNC:31512]	7	128207872	128207943	1
ENSG00000199077	MIR129-2	-1.28633	6.3376	-4.5795	0.000519833	0.00262781	-0.556031	406918	microRNA 129-2 [Source:HGNC Symbol;Acc:HGNC:31513]	11	43581394	43581483	1
ENSG00000221604	MIR1293	-6.19799	-0.753701	-11.6437	3.07e-08	1.1e-06	9.42223	100302220	microRNA 1293 [Source:HGNC Symbol;Acc:HGNC:35286]	12	50234142	50234212	-1
ENSG00000221430	MIR1294	0.299512	2.21562	1.3905	0.187779	0.298502	-6.57202	100302181	microRNA 1294 [Source:HGNC Symbol;Acc:HGNC:35287]	5	154347106	154347247	1
ENSG00000221390	MIR1295A	-0.282129	1.05338	-1.15995	0.266979	0.393167	-6.86306	100302178	microRNA 1295a [Source:HGNC Symbol;Acc:HGNC:35288]	1	171101728	171101806	-1
ENSG00000283598	MIR1295B	-0.282129	1.05338	-1.15995	0.266979	0.393167	-6.86306	100847009	microRNA 1295b [Source:HGNC Symbol;Acc:HGNC:43524]	1	171101739	171101798	1
ENSG00000221063	MIR1296	-0.1857	6.95478	-0.454579	0.656928	0.765026	-7.04598	100302150	microRNA 1296 [Source:HGNC Symbol;Acc:HGNC:35249]	10	63372957	63373048	-1
ENSG00000221710	MIR1298	-3.23298	0.373186	-7.537	4.33e-06	5.83e-05	4.33323	100302153	microRNA 1298 [Source:HGNC Symbol;Acc:HGNC:35258]	X	114715233	114715344	1
ENSG00000221445	MIR1301	-0.949503	5.54264	-3.52598	0.00373691	0.0129459	-2.63089	100302246	microRNA 1301 [Source:HGNC Symbol;Acc:HGNC:35253]	2	25328640	25328721	-1
ENSG00000221552	MIR1303	1.62385	1.28991	6.08446	3.92e-05	0.00033579	1.85319	100302284	microRNA 1303 [Source:HGNC Symbol;Acc:HGNC:35301]	5	154685776	154685861	1
ENSG00000221227	MIR1305	-0.607434	0.56719	-2.72505	0.0173769	0.0449766	-4.37916	100302270	microRNA 1305 [Source:HGNC Symbol;Acc:HGNC:35303]	4	182169293	182169378	1
ENSG00000208009	MIR130A	0.710724	8.53473	2.0299	0.063401	0.126381	-5.09558	406919	microRNA 130a [Source:HGNC Symbol;Acc:HGNC:31514]	11	57641198	57641286	1
ENSG00000207751	MIR130B	-0.1371	10.0254	-0.344068	0.73631	0.826015	-6.81297	406920	microRNA 130b [Source:HGNC Symbol;Acc:HGNC:31515]	22	21652270	21670237	1
ENSG00000267200	MIR132	-3.23747	7.19118	-10.7734	7.71e-08	2.01e-06	8.53689	406921	microRNA 132 [Source:HGNC Symbol;Acc:HGNC:31516]	17	2049908	2050008	-1
ENSG00000265142	MIR133A1HG	-2.33424	3.02705	-11.4444	3.78e-08	1.2e-06	9.11051	406905 406922 102723167	MIR133A1 host gene [Source:HGNC Symbol;Acc:HGNC:49594]	18	21825487	21831410	-1
ENSG00000251862	MIR1343	-0.234266	2.97484	-1.17323	0.261803	0.386694	-6.81149	100616437	microRNA 1343 [Source:HGNC Symbol;Acc:HGNC:41902]	11	34941837	34941920	1
ENSG00000207926	MIR135A1	-1.98632	5.47538	-7.74344	3.24e-06	4.51e-05	4.62179	406925	microRNA 135a-1 [Source:HGNC Symbol;Acc:HGNC:31520]	3	52294219	52294308	-1
ENSG00000207586	MIR135A2	-5.42219	4.39027	-19.1129	7e-11	7.31e-09	15.4387	406926	microRNA 135a-2 [Source:HGNC Symbol;Acc:HGNC:31521]	12	97563812	97563911	1
ENSG00000199059	MIR135B	-8.36217	4.00837	-20.7245	2.53e-11	3.91e-09	16.3159	442891	microRNA 135b [Source:HGNC Symbol;Acc:HGNC:31760]	1	205448302	205448398	-1
ENSG00000225206	MIR137HG	-3.33995	0.0713893	-11.2435	4.66e-08	1.42e-06	9.02741	400765 406928 100616452	MIR137 host gene [Source:HGNC Symbol;Acc:HGNC:42871]	1	97986740	98049863	-1
ENSG00000207954	MIR138-1	2.78199	2.00392	10.0443	1.75e-07	3.68e-06	7.5232	406929	microRNA 138-1 [Source:HGNC Symbol;Acc:HGNC:31524]	3	44114212	44114310	1
ENSG00000207649	MIR138-2	1.95046	0.920657	7.48776	4.65e-06	6.09e-05	4.13834	406930	microRNA 138-2 [Source:HGNC Symbol;Acc:HGNC:31525]	16	56858518	56858601	1
ENSG00000272036	MIR139	-2.82466	2.44063	-10.0473	1.74e-07	3.68e-06	7.51004	406931	microRNA 139 [Source:HGNC Symbol;Acc:HGNC:31526]	11	72615063	72615130	-1
ENSG00000208017	MIR140	1.16918	11.3651	2.24092	0.0431711	0.0941327	-4.51316	406932	microRNA 140 [Source:HGNC Symbol;Acc:HGNC:31527]	16	69933081	69933180	1
ENSG00000276365	MIR145	-3.11602	4.37604	-9.37273	3.87e-07	7.21e-06	6.76313	406937	microRNA 145 [Source:HGNC Symbol;Acc:HGNC:31532]	5	149430646	149430733	1
ENSG00000222532	MIR1468	-0.728789	3.28445	-3.55335	0.00354621	0.0124595	-2.76351	100302115	microRNA 1468 [Source:HGNC Symbol;Acc:HGNC:35250]	X	63786002	63786087	-1
ENSG00000202569	MIR146B	-3.09551	11.6216	-7.19658	7.08e-06	8.47e-05	4.11958	574447	microRNA 146b [Source:HGNC Symbol;Acc:HGNC:32079]	10	102436512	102436584	1
ENSG00000199085	MIR148A	1.92249	16.0901	3.20813	0.00687841	0.0214043	-2.49413	406940	microRNA 148a [Source:HGNC Symbol;Acc:HGNC:31535]	7	25949919	25949986	-1
ENSG00000199122	MIR148B	0.728873	13.0037	1.14564	0.272647	0.399849	-5.97884	442892	microRNA 148b [Source:HGNC Symbol;Acc:HGNC:31761]	12	54337216	54337314	1
ENSG00000207611	MIR149	-0.927412	8.76027	-2.63119	0.0207753	0.0525106	-4.02979	406941	microRNA 149 [Source:HGNC Symbol;Acc:HGNC:31536]	2	240456001	240456089	1
ENSG00000254324	MIR151A	0.238357	13.0077	0.50516	0.621922	0.737082	-6.50729	442893	microRNA 151a [Source:HGNC Symbol;Acc:HGNC:31762]	8	140732564	140732653	-1
ENSG00000265154	MIR151B	1.61289	3.45212	4.53946	0.000559131	0.00274795	-0.850608	100616247	microRNA 151b [Source:HGNC Symbol;Acc:HGNC:41588]	14	100109419	100109514	-1
ENSG00000207947	MIR152	-0.545327	9.7951	-1.29248	0.218746	0.338013	-6.05816	406943	microRNA 152 [Source:HGNC Symbol;Acc:HGNC:31538]	17	48037161	48037247	-1
ENSG00000234883	MIR155HG	-4.67251	2.47933	-21.4728	1.61e-11	3.91e-09	16.9045	114614 406947	MIR155 host gene [Source:HGNC Symbol;Acc:HGNC:35460]	21	25561909	25575168	1
ENSG00000207779	MIR15B	0.942621	9.16465	2.53242	0.0250483	0.060709	-4.17241	406949	microRNA 15b [Source:HGNC Symbol;Acc:HGNC:31544]	3	160404588	160404685	1
ENSG00000208006	MIR16-1	1.69837	9.40068	4.08637	0.00129184	0.00539611	-1.22877	406950	microRNA 16-1 [Source:HGNC Symbol;Acc:HGNC:31545]	13	50048973	50049061	-1
ENSG00000198987	MIR16-2	1.30197	9.66753	3.50579	0.00388417	0.0133812	-2.31161	406951	microRNA 16-2 [Source:HGNC Symbol;Acc:HGNC:31546]	3	160404745	160404825	1
ENSG00000215417	MIR17HG	0.3796	15.2155	0.642937	0.531469	0.661184	-6.26988	406952 406953 406979 406980 406982 407048 407975	miR-17-92a-1 cluster host gene [Source:HGNC Symbol;Acc:HGNC:23564]	13	91347820	91354579	1
ENSG00000207759	MIR181A1	1.00541	10.7555	2.22529	0.044432	0.096373	-4.58582	406995	microRNA 181a-1 [Source:HGNC Symbol;Acc:HGNC:31590]	1	198859044	198859153	-1
ENSG00000207595	MIR181A2	0.591918	10.7525	1.40668	0.183033	0.29335	-5.83542	406954	microRNA 181a-2 [Source:HGNC Symbol;Acc:HGNC:31549]	9	124692442	124692551	1
ENSG00000207975	MIR181B1	0.777044	9.6233	2.12404	0.0534768	0.111399	-4.84691	406955	microRNA 181b-1 [Source:HGNC Symbol;Acc:HGNC:31550]	1	198858873	198858982	-1
ENSG00000207737	MIR181B2	0.704118	9.8434	1.86788	0.0845384	0.158878	-5.24466	406956	microRNA 181b-2 [Source:HGNC Symbol;Acc:HGNC:31551]	9	124693710	124693798	1
ENSG00000207613	MIR181C	-0.865263	2.47926	-3.41807	0.0045954	0.0154956	-3.06696	406957	microRNA 181c [Source:HGNC Symbol;Acc:HGNC:31552]	19	13874699	13874808	1
ENSG00000207585	MIR181D	-0.970734	4.25834	-4.19598	0.0010528	0.00454967	-1.45422	574457	microRNA 181d [Source:HGNC Symbol;Acc:HGNC:32089]	19	13874875	13875011	1
ENSG00000207990	MIR182	-3.07477	4.74927	-10.1743	1.5e-07	3.28e-06	7.76046	406958	microRNA 182 [Source:HGNC Symbol;Acc:HGNC:31553]	7	129770383	129770492	-1
ENSG00000207691	MIR183	-3.18058	4.00851	-12.4753	1.35e-08	5.56e-07	10.2087	406959	microRNA 183 [Source:HGNC Symbol;Acc:HGNC:31554]	7	129774905	129775014	-1
ENSG00000207695	MIR184	-3.43151	-1.08412	-9.30975	4.18e-07	7.67e-06	6.89412	406960	microRNA 184 [Source:HGNC Symbol;Acc:HGNC:31555]	15	79209788	79209871	1
ENSG00000208023	MIR185	0.192331	8.18271	0.53313	0.602961	0.721707	-6.8885	406961	microRNA 185 [Source:HGNC Symbol;Acc:HGNC:31556]	22	20033139	20033220	1
ENSG00000207721	MIR186	0.421659	8.81526	1.20533	0.249609	0.373567	-6.24531	406962	microRNA 186 [Source:HGNC Symbol;Acc:HGNC:31557]	1	71067631	71067716	-1
ENSG00000207797	MIR187	-1.24967	1.14877	-5.88489	5.42e-05	0.000431818	1.48443	406963	microRNA 187 [Source:HGNC Symbol;Acc:HGNC:31558]	18	35904818	35904926	-1
ENSG00000207768	MIR188	1.92362	3.79538	8.36832	1.39e-06	2.12e-05	5.40441	406964	microRNA 188 [Source:HGNC Symbol;Acc:HGNC:31559]	X	50003503	50003588	1
ENSG00000211137	MIR190A	0.934564	4.31403	3.63894	0.00301132	0.0108416	-2.51344	406965	microRNA 190a [Source:HGNC Symbol;Acc:HGNC:31560]	15	62823957	62824041	1
ENSG00000215938	MIR190B	-0.028277	1.3279	-0.0995274	0.922242	0.953022	-7.54252	100126346	microRNA 190b [Source:HGNC Symbol;Acc:HGNC:33656]	1	154193665	154193743	-1
ENSG00000207605	MIR191	-0.246981	11.2696	-0.539441	0.598723	0.718569	-6.62164	406966	microRNA 191 [Source:HGNC Symbol;Acc:HGNC:31561]	3	49020618	49020709	-1
ENSG00000283416	MIR1910	3.34631	-1.57411	7.14203	7.67e-06	8.92e-05	3.99975	100302261	microRNA 1910 [Source:HGNC Symbol;Acc:HGNC:35394]	16	85741621	85741700	-1
ENSG00000207614	MIR193A	-2.27594	-0.141053	-9.16571	4.99e-07	8.65e-06	6.57531	406968	microRNA 193a [Source:HGNC Symbol;Acc:HGNC:31563]	17	31559996	31560083	1
ENSG00000207639	MIR193B	2.01713	3.40341	4.86427	0.000311351	0.00181037	-0.241727	574455	microRNA 193b [Source:HGNC Symbol;Acc:HGNC:32087]	16	14303967	14304049	1
ENSG00000207624	MIR194-1	0.334648	4.04588	1.54038	0.147508	0.247378	-6.25816	406969	microRNA 194-1 [Source:HGNC Symbol;Acc:HGNC:31564]	1	220118157	220118241	-1
ENSG00000229719	MIR194-2HG	0.01152	10.0337	0.0310974	0.975665	0.983607	-6.87441	406967 406970	MIR194-2 host gene [Source:HGNC Symbol;Acc:HGNC:51946]	11	64889560	64893449	-1
ENSG00000210741	MIR196A1	-2.67093	8.73715	-7.76589	3.14e-06	4.42e-05	4.84378	406972	microRNA 196a-1 [Source:HGNC Symbol;Acc:HGNC:31567]	17	48632490	48632559	-1
ENSG00000207924	MIR196A2	-2.69285	8.86223	-7.80853	2.96e-06	4.19e-05	4.90904	406973	microRNA 196a-2 [Source:HGNC Symbol;Acc:HGNC:31568]	12	53991738	53991847	1
ENSG00000238705	MIR1976	-0.00294285	2.21217	-0.0122924	0.990379	0.994221	-7.54015	100302190	microRNA 1976 [Source:HGNC Symbol;Acc:HGNC:37064]	1	26554542	26554593	1
ENSG00000207752	MIR199A1	-0.365359	9.6981	-1.03093	0.321421	0.457563	-6.35918	406976	microRNA 199a-1 [Source:HGNC Symbol;Acc:HGNC:31571]	19	10817426	10817496	-1
ENSG00000208024	MIR199A2	-0.365629	9.69648	-1.03191	0.320975	0.457191	-6.35832	406977	microRNA 199a-2 [Source:HGNC Symbol;Acc:HGNC:31572]	1	172144535	172144644	-1
ENSG00000207581	MIR199B	1.57373	13.3519	3.02553	0.00977172	0.0285768	-2.96864	406978	microRNA 199b [Source:HGNC Symbol;Acc:HGNC:31573]	9	128244721	128244830	-1
ENSG00000207607	MIR200A	0.871495	1.47432	4.217	0.00101243	0.00440737	-1.53679	406983	microRNA 200a [Source:HGNC Symbol;Acc:HGNC:31578]	1	1167863	1167952	1
ENSG00000207730	MIR200B	0.635113	3.54674	3.066	0.00904037	0.0267859	-3.67492	406984	microRNA 200b [Source:HGNC Symbol;Acc:HGNC:31579]	1	1167104	1167198	1
ENSG00000207713	MIR200C	0.133961	3.24757	0.552536	0.589979	0.712297	-7.32966	406985	microRNA 200c [Source:HGNC Symbol;Acc:HGNC:31580]	12	6963699	6963766	1
ENSG00000207935	MIR204	-3.33963	1.83521	-10.6693	8.64e-08	2.21e-06	8.23974	406987	microRNA 204 [Source:HGNC Symbol;Acc:HGNC:31582]	9	70809975	70810084	-1
ENSG00000230937	MIR205HG	-7.51449	-1.19311	-17.7661	1.75e-10	1.6e-08	14.0797	406988	MIR205 host gene [Source:HGNC Symbol;Acc:HGNC:43562]	1	209428820	209432838	1
ENSG00000199038	MIR210	0.755766	7.0136	2.63675	0.0205572	0.0520123	-4.17228	406992	microRNA 210 [Source:HGNC Symbol;Acc:HGNC:31587]	11	568089	568198	-1
ENSG00000252466	MIR2115	0.372867	0.713546	2.09203	0.0566764	0.116407	-5.4988	100313840	microRNA 2115 [Source:HGNC Symbol;Acc:HGNC:37309]	3	48316360	48316459	-1
ENSG00000267195	MIR212	-5.32024	4.65804	-22.5768	8.56e-12	3.51e-09	17.3898	406994	microRNA 212 [Source:HGNC Symbol;Acc:HGNC:31589]	17	2050271	2050380	-1
ENSG00000207590	MIR215	0.452795	3.41551	2.16104	0.0499882	0.105739	-5.33686	406997	microRNA 215 [Source:HGNC Symbol;Acc:HGNC:31592]	1	220117853	220117962	-1
ENSG00000207798	MIR216A	-10.3594	-0.217649	-21.3751	1.71e-11	3.91e-09	15.8817	406998	microRNA 216a [Source:HGNC Symbol;Acc:HGNC:31593]	2	55988950	55989059	-1
ENSG00000211520	MIR216B	-10.4373	0.827882	-22.1579	1.09e-11	3.51e-09	16.1628	100126319	microRNA 216b [Source:HGNC Symbol;Acc:HGNC:33668]	2	56000714	56000795	-1
ENSG00000207548	MIR217	-9.98011	2.68952	-28.4716	4.47e-13	1.11e-09	18.7082	406999	microRNA 217 [Source:HGNC Symbol;Acc:HGNC:31594]	2	55982967	55983076	-1
ENSG00000207732	MIR218-1	-2.70248	9.26058	-7.45434	4.87e-06	6.27e-05	4.4199	407000	microRNA 218-1 [Source:HGNC Symbol;Acc:HGNC:31595]	4	20528275	20528384	1
ENSG00000207739	MIR218-2	-2.7204	9.14844	-7.60595	3.93e-06	5.35e-05	4.63348	407001	microRNA 218-2 [Source:HGNC Symbol;Acc:HGNC:31596]	5	168768146	168768255	-1
ENSG00000199036	MIR219A1	-5.46506	4.52577	-22.6739	8.11e-12	3.51e-09	17.4425	407002	microRNA 219a-1 [Source:HGNC Symbol;Acc:HGNC:31597]	6	33207835	33207944	1
ENSG00000207955	MIR219A2	-6.22449	7.70532	-17.2667	2.49e-10	2.13e-08	14.0258	407003	microRNA 219a-2 [Source:HGNC Symbol;Acc:HGNC:31598]	9	128392007	128393510	-1
ENSG00000283335	MIR219B	-6.22533	7.70459	-17.2795	2.47e-10	2.13e-08	14.0342	100616335	microRNA 219b [Source:HGNC Symbol;Acc:HGNC:41823]	9	128392621	128392708	1
ENSG00000207870	MIR221	-1.06438	10.8645	-2.31578	0.0375872	0.0841044	-4.42402	407006	microRNA 221 [Source:HGNC Symbol;Acc:HGNC:31601]	X	45746157	45746266	-1
ENSG00000207725	MIR222	-1.41706	10.5239	-3.10529	0.00838267	0.0251075	-3.00966	407007	microRNA 222 [Source:HGNC Symbol;Acc:HGNC:31602]	X	45747015	45747124	-1
ENSG00000274536	MIR223	0.313272	1.76993	1.35042	0.199978	0.314305	-6.62835	407008	microRNA 223 [Source:HGNC Symbol;Acc:HGNC:31603]	X	66015461	66020422	1
ENSG00000252695	MIR2276	-0.64114	1.8412	-2.96738	0.0109265	0.0311807	-3.93422	100313842	microRNA 2276 [Source:HGNC Symbol;Acc:HGNC:37313]	13	24162416	24162504	1
ENSG00000252153	MIR2278	0.638291	1.16109	3.23282	0.00655953	0.0206454	-3.42298	100313780	microRNA 2278 [Source:HGNC Symbol;Acc:HGNC:37315]	9	94809962	94810057	1
ENSG00000186594	MIR22HG	-0.76336	7.42491	-2.15152	0.0508646	0.106863	-4.99489	84981 407004	MIR22 host gene [Source:HGNC Symbol;Acc:HGNC:28219]	17	1711493	1717174	-1
ENSG00000253008	MIR2355	1.03502	2.317	4.71947	0.000403539	0.00218246	-0.579053	100423036	microRNA 2355 [Source:HGNC Symbol;Acc:HGNC:38328]	2	207109987	207110073	-1
ENSG00000207980	MIR23A	0.318856	8.532	0.816188	0.429131	0.565403	-6.65933	407010	microRNA 23a [Source:HGNC Symbol;Acc:HGNC:31605]	19	13836587	13836659	-1
ENSG00000207563	MIR23B	1.93165	9.80583	4.6665	0.000444	0.00233501	-0.123192	407011	microRNA 23b [Source:HGNC Symbol;Acc:HGNC:31606]	9	95085208	95085304	1
ENSG00000267519	MIR24-2	0.0941223	8.47621	0.275686	0.787133	0.861679	-6.97145	284454 407013	microRNA 24-2 [Source:HGNC Symbol;Acc:HGNC:31608]	19	13834516	13836359	-1
ENSG00000264292	MIR2467	0.685366	0.406712	3.07891	0.00881881	0.0262235	-3.64853	100616360	microRNA 2467 [Source:HGNC Symbol;Acc:HGNC:41881]	2	239351724	239351804	-1
ENSG00000207547	MIR25	-0.194279	13.4322	-0.365049	0.72096	0.812474	-6.54024	407014	microRNA 25 [Source:HGNC Symbol;Acc:HGNC:31609]	7	100093560	100093643	-1
ENSG00000199075	MIR26A1	0.0610135	13.5212	0.122261	0.904566	0.943018	-6.59575	407015	microRNA 26a-1 [Source:HGNC Symbol;Acc:HGNC:31610]	3	37969404	37969480	1
ENSG00000207789	MIR26A2	0.0590716	13.527	0.118333	0.907617	0.943456	-6.59584	407016	microRNA 26a-2 [Source:HGNC Symbol;Acc:HGNC:31611]	12	57824609	57824692	-1
ENSG00000199121	MIR26B	0.757427	11.0157	1.77729	0.0989668	0.181317	-5.29149	407017	microRNA 26b [Source:HGNC Symbol;Acc:HGNC:31612]	2	218402646	218402722	1
ENSG00000207808	MIR27A	0.0207938	8.45164	0.0671681	0.947472	0.968243	-7.01193	407018	microRNA 27a [Source:HGNC Symbol;Acc:HGNC:31613]	19	13836440	13836517	-1
ENSG00000207864	MIR27B	1.6504	13.2681	3.04577	0.00939883	0.0276167	-2.93587	407019	microRNA 27b [Source:HGNC Symbol;Acc:HGNC:31614]	9	95085445	95085541	1
ENSG00000207651	MIR28	0.563319	11.8378	1.20496	0.249748	0.373567	-5.99871	407020	microRNA 28 [Source:HGNC Symbol;Acc:HGNC:31615]	3	188688781	188688866	1
ENSG00000268649	MIR296	-0.0314347	5.65664	-0.104228	0.918583	0.95043	-7.27882	407022	microRNA 296 [Source:HGNC Symbol;Acc:HGNC:31617]	20	58817132	58817725	-1
ENSG00000226380	MIR29A	2.02038	5.27476	6.97664	9.8e-06	0.000109938	3.47034	407021 407024	microRNA 29a [Source:HGNC Symbol;Acc:HGNC:31616]	7	130876747	130913310	-1
ENSG00000207996	MIR301A	0.427435	7.03516	1.40617	0.18318	0.29335	-6.16202	407027	microRNA 301a [Source:HGNC Symbol;Acc:HGNC:31622]	17	59151136	59151221	-1
ENSG00000212102	MIR301B	0.393648	4.96831	1.78627	0.0974435	0.178791	-5.8182	100126318	microRNA 301b [Source:HGNC Symbol;Acc:HGNC:33667]	22	21652981	21653058	1
ENSG00000211563	MIR3065	-2.91743	3.80724	-11.5765	3.29e-08	1.13e-06	9.28023	100422915	microRNA 3065 [Source:HGNC Symbol;Acc:HGNC:38234]	17	81125877	81125955	1
ENSG00000207617	MIR3074	0.125087	8.46333	0.367007	0.719533	0.811235	-6.94146	100422842	microRNA 3074 [Source:HGNC Symbol;Acc:HGNC:38268]	9	95086014	95086094	-1
ENSG00000207827	MIR30A	0.989686	13.793	1.61811	0.129692	0.225436	-5.32416	407029	microRNA 30a [Source:HGNC Symbol;Acc:HGNC:31624]	6	71403551	71403621	-1
ENSG00000207582	MIR30B	1.64115	9.04027	3.59005	0.00330598	0.0117488	-2.19712	407030	microRNA 30b [Source:HGNC Symbol;Acc:HGNC:31625]	8	134800520	134800607	-1
ENSG00000207962	MIR30C1	0.0515965	10.525	0.12846	0.899755	0.940377	-6.82542	407031	microRNA 30c-1 [Source:HGNC Symbol;Acc:HGNC:31626]	1	40757284	40757372	1
ENSG00000199094	MIR30C2	0.0622942	10.6388	0.152081	0.881464	0.9291	-6.8126	407032	microRNA 30c-2 [Source:HGNC Symbol;Acc:HGNC:31627]	6	71376960	71377031	-1
ENSG00000199153	MIR30D	0.415381	13.8401	0.758279	0.461843	0.595826	-6.28294	407033	microRNA 30d [Source:HGNC Symbol;Acc:HGNC:31628]	8	134804876	134804945	-1
ENSG00000198974	MIR30E	0.577494	12.343	1.23478	0.238819	0.361808	-5.92632	407034	microRNA 30e [Source:HGNC Symbol;Acc:HGNC:31629]	1	40754355	40754446	1
ENSG00000199177	MIR31	-1.27197	5.5119	-4.51908	0.0005803	0.00284072	-0.741505	407035	microRNA 31 [Source:HGNC Symbol;Acc:HGNC:31630]	9	21512115	21512185	-1
ENSG00000263793	MIR3115	0.488987	2.05212	2.78395	0.0155286	0.0410505	-4.28238	100422866	microRNA 3115 [Source:HGNC Symbol;Acc:HGNC:38371]	1	23044305	23044372	1
ENSG00000283340	MIR3119-2	3.87903	-1.1727	9.28885	4.29e-07	7.75e-06	6.86982	100422839 100423010	microRNA 3119-2 [Source:HGNC Symbol;Acc:HGNC:38315]	1	170151378	170151462	-1
ENSG00000283152	MIR3120	-2.67824	3.74467	-6.01077	4.41e-05	0.000369394	1.79169	100422882	microRNA 3120 [Source:HGNC Symbol;Acc:HGNC:38295]	1	172138808	172138888	1
ENSG00000264370	MIR3125	0.255755	1.55877	0.922551	0.373088	0.513014	-7.1011	100422986	microRNA 3125 [Source:HGNC Symbol;Acc:HGNC:38219]	2	12737367	12737444	1
ENSG00000264157	MIR3127	0.229982	2.05621	1.26448	0.228312	0.349368	-6.73349	100422928	microRNA 3127 [Source:HGNC Symbol;Acc:HGNC:38269]	2	96798278	96798353	1
ENSG00000265396	MIR3128	1.48236	1.46318	4.75203	0.000380593	0.00209962	-0.52087	100422824	microRNA 3128 [Source:HGNC Symbol;Acc:HGNC:38188]	2	177255945	177256010	-1
ENSG00000264755	MIR3131	-0.392297	1.28328	-2.31618	0.0375595	0.0841044	-5.14156	100422957	microRNA 3131 [Source:HGNC Symbol;Acc:HGNC:38347]	2	219058688	219058750	-1
ENSG00000263752	MIR3133	0.159324	-0.129771	0.747289	0.468223	0.602175	-7.09754	100422942	microRNA 3133 [Source:HGNC Symbol;Acc:HGNC:38305]	2	241477905	241477982	1
ENSG00000266745	MIR3135A	2.69094	-0.287447	9.18871	4.85e-07	8.46e-06	6.701	100422901	microRNA 3135a [Source:HGNC Symbol;Acc:HGNC:38199]	3	20137565	20137641	1
ENSG00000264931	MIR3138	-0.0335745	0.748095	-0.185781	0.855491	0.913778	-7.51814	100423011	microRNA 3138 [Source:HGNC Symbol;Acc:HGNC:38341]	4	10078611	10078692	-1
ENSG00000265623	MIR3139	1.66826	1.94849	7.46281	4.82e-06	6.26e-05	4.02786	100423017	microRNA 3139 [Source:HGNC Symbol;Acc:HGNC:38201]	4	143343460	143343535	1
ENSG00000253522	MIR3142HG	-0.383954	2.6233	-1.95543	0.0724294	0.140712	-5.73472	406938 107075116	MIR3142 host gene [Source:HGNC Symbol;Acc:HGNC:51944]	5	160468268	160487426	1
ENSG00000265565	MIR3143	-0.150837	1.07143	-0.728335	0.479355	0.61333	-7.27082	100422934	microRNA 3143 [Source:HGNC Symbol;Acc:HGNC:38284]	6	27147626	27147688	1
ENSG00000266712	MIR3149	0.201206	0.308062	0.87785	0.395998	0.535722	-7.08296	100422921	microRNA 3149 [Source:HGNC Symbol;Acc:HGNC:38251]	8	76966768	76966850	-1
ENSG00000264823	MIR3154	0.919336	1.48097	4.2983	0.000870724	0.00400145	-1.38229	100422893	microRNA 3154 [Source:HGNC Symbol;Acc:HGNC:38176]	9	128244947	128245030	-1
ENSG00000263436	MIR3158-1	-1.26734	5.57583	-4.55879	0.00053979	0.00268486	-0.661856	100422900 100423033	microRNA 3158-1 [Source:HGNC Symbol;Acc:HGNC:38196]	10	101601417	101601497	1
ENSG00000264607	MIR3173	-1.35771	1.20571	-5.76997	6.55e-05	0.000504141	1.2877	100422981	microRNA 3173 [Source:HGNC Symbol;Acc:HGNC:38174]	14	95137919	95137986	-1
ENSG00000265871	MIR3174	-0.785071	2.45045	-4.32275	0.000832231	0.00387322	-1.33229	100422841	microRNA 3174 [Source:HGNC Symbol;Acc:HGNC:38264]	15	90006755	90006841	1
ENSG00000266235	MIR3176	0.685835	2.32403	3.24644	0.00639002	0.0202924	-3.39386	100423037	microRNA 3176 [Source:HGNC Symbol;Acc:HGNC:38345]	16	543277	543366	1
ENSG00000265820	MIR3177	-0.988699	3.48649	-3.98994	0.00154814	0.00630716	-1.90738	100423012	microRNA 3177 [Source:HGNC Symbol;Acc:HGNC:38364]	16	1734985	1735066	1
ENSG00000265537	MIR3180-1	-1.34072	0.00664632	-7.3183	5.93e-06	7.38e-05	3.90894	100422870	microRNA 3180-1 [Source:HGNC Symbol;Acc:HGNC:38382]	16	14911220	14911313	1
ENSG00000258354	MIR3180-1	-1.17099	0.259947	-6.8264	1.23e-05	0.00013004	3.09293		microRNA 3180-1 [Source:HGNC Symbol;Acc:HGNC:38382]	16	14909887	14911345	-1
ENSG00000265373	MIR3180-2	-1.34072	0.00664632	-7.3183	5.93e-06	7.38e-05	3.90894	100422956	microRNA 3180-2 [Source:HGNC Symbol;Acc:HGNC:38343]	16	16309879	16309966	1
ENSG00000257366	MIR3180-2	-1.17099	0.259947	-6.8264	1.23e-05	0.00013004	3.09293		microRNA 3180-2 [Source:HGNC Symbol;Acc:HGNC:38343]	16	16308542	16310000	-1
ENSG00000266291	MIR3180-3	-1.34333	-0.0150792	-7.11632	7.97e-06	9.18e-05	3.60617	100422836	microRNA 3180-3 [Source:HGNC Symbol;Acc:HGNC:38239]	16	18402178	18402271	-1
ENSG00000257563	MIR3180-3	-1.14342	0.24616	-6.67167	1.55e-05	0.000158916	2.84811		microRNA 3180-3 [Source:HGNC Symbol;Acc:HGNC:38239]	16	18402146	18403604	1
ENSG00000264115	MIR3180-4	-1.40486	-0.0212739	-7.59072	4.01e-06	5.43e-05	4.3252	100500852	microRNA 3180-4 [Source:HGNC Symbol;Acc:HGNC:38920]	16	15154850	15155002	-1
ENSG00000257391	MIR3180-4	-1.30544	0.0850487	-7.15332	7.54e-06	8.81e-05	3.63938		microRNA 3180-4 [Source:HGNC Symbol;Acc:HGNC:38920]	16	15154903	15157020	1
ENSG00000264397	MIR3180-5	-1.39319	-0.0270087	-7.45235	4.89e-06	6.27e-05	4.12063	100500916	microRNA 3180-5 [Source:HGNC Symbol;Acc:HGNC:38969]	16	2135977	2136129	-1
ENSG00000266919	MIR3184	0.484159	13.1306	0.940845	0.363981	0.50346	-6.17852	100423003	microRNA 3184 [Source:HGNC Symbol;Acc:HGNC:38182]	17	30117079	30117172	-1
ENSG00000263414	MIR3187	0.458874	4.52695	2.02929	0.0634709	0.126381	-5.46861	100422854	microRNA 3187 [Source:HGNC Symbol;Acc:HGNC:38319]	19	813584	813653	1
ENSG00000265134	MIR3190	0.664872	1.40203	3.84377	0.00204005	0.00782231	-2.25079	100422899	microRNA 3190 [Source:HGNC Symbol;Acc:HGNC:38190]	19	47226942	47227021	1
ENSG00000264073	MIR3199-1	-0.938499	0.785165	-4.66073	0.000448656	0.00234461	-0.70031	100423034	microRNA 3199-1 [Source:HGNC Symbol;Acc:HGNC:38294]	22	27920525	27920612	-1
ENSG00000283225	MIR3199-2	-0.938499	0.785165	-4.66073	0.000448656	0.00234461	-0.70031	100422998	microRNA 3199-2 [Source:HGNC Symbol;Acc:HGNC:38205]	22	27920526	27920611	1
ENSG00000207698	MIR32	0.391251	6.96457	1.47055	0.165257	0.271807	-6.08346	407036	microRNA 32 [Source:HGNC Symbol;Acc:HGNC:31631]	9	109046229	109046298	-1
ENSG00000264661	MIR3200	0.288766	4.44882	0.975971	0.346934	0.486612	-6.90066	100422912	microRNA 3200 [Source:HGNC Symbol;Acc:HGNC:38227]	22	30731557	30731641	1
ENSG00000208037	MIR320A	0.732275	11.7506	1.61064	0.13132	0.226705	-5.48098	407037	microRNA 320a [Source:HGNC Symbol;Acc:HGNC:31632]	8	22244962	22245043	-1
ENSG00000211543	MIR320B1	0.269837	5.84424	1.00418	0.333662	0.472274	-6.7445	100302117	microRNA 320b-1 [Source:HGNC Symbol;Acc:HGNC:35247]	1	116671749	116671827	1
ENSG00000221406	MIR320B2	0.270139	5.84238	1.00439	0.333563	0.472274	-6.74447	100313769	microRNA 320b-2 [Source:HGNC Symbol;Acc:HGNC:35256]	1	224257004	224257141	-1
ENSG00000221493	MIR320C1	0.58841	6.08483	1.87941	0.0828452	0.156626	-5.56667	100302135	microRNA 320c-1 [Source:HGNC Symbol;Acc:HGNC:35248]	18	21683510	21683597	1
ENSG00000212051	MIR320C2	0.593612	6.00537	1.89697	0.0803242	0.152345	-5.54647	100302195	microRNA 320c-2 [Source:HGNC Symbol;Acc:HGNC:35387]	18	24321686	24321735	1
ENSG00000211491	MIR320D1	0.291815	0.470875	1.04334	0.315853	0.452675	-6.94101	100313896	microRNA 320d-1 [Source:HGNC Symbol;Acc:HGNC:35386]	13	40727828	40727875	-1
ENSG00000221081	MIR320D2	0.419418	2.11905	1.76221	0.101573	0.185269	-6.04721	100302169	microRNA 320d-2 [Source:HGNC Symbol;Acc:HGNC:35388]	X	140926172	140926219	-1
ENSG00000211513	MIR320E	0.319066	1.54423	1.19174	0.254718	0.378714	-6.81979	100422913	microRNA 320e [Source:HGNC Symbol;Acc:HGNC:38230]	19	46709293	46709345	-1
ENSG00000199069	MIR323A	-7.46708	-1.84982	-15.335	1.09e-09	7.27e-08	12.5022	442897	microRNA 323a [Source:HGNC Symbol;Acc:HGNC:31766]	14	101025732	101025817	1
ENSG00000199053	MIR324	0.784766	6.39266	2.4594	0.0287414	0.0683885	-4.55171	442898	microRNA 324 [Source:HGNC Symbol;Acc:HGNC:31767]	17	7223297	7223379	-1
ENSG00000199090	MIR326	2.14727	5.48091	6.35585	2.54e-05	0.000236625	2.49985	442900	microRNA 326 [Source:HGNC Symbol;Acc:HGNC:31769]	11	75335092	75335186	-1
ENSG00000207948	MIR328	-1.13884	6.58436	-3.85264	0.00200609	0.00770402	-1.9076	442901	microRNA 328 [Source:HGNC Symbol;Acc:HGNC:31770]	16	67202321	67202395	-1
ENSG00000199172	MIR331	0.752933	8.10049	2.17534	0.0486982	0.103541	-4.89076	442903	microRNA 331 [Source:HGNC Symbol;Acc:HGNC:31772]	12	95308420	95308513	1
ENSG00000199043	MIR335	-2.21502	10.8118	-5.39475	0.000123286	0.000841263	1.22651	442904	microRNA 335 [Source:HGNC Symbol;Acc:HGNC:31773]	7	130496111	130496204	1
ENSG00000283604	MIR338	-2.91743	3.80724	-11.5765	3.29e-08	1.13e-06	9.28023	442906	microRNA 338 [Source:HGNC Symbol;Acc:HGNC:31775]	17	81125883	81125949	-1
ENSG00000199023	MIR339	-0.299762	7.11799	-0.870227	0.399998	0.538476	-6.74608	442907	microRNA 339 [Source:HGNC Symbol;Acc:HGNC:31776]	7	1022933	1023026	-1
ENSG00000207932	MIR33A	0.0243396	6.18016	0.0951894	0.92562	0.954862	-7.22747	407039	microRNA 33a [Source:HGNC Symbol;Acc:HGNC:31634]	22	41900944	41901012	1
ENSG00000207839	MIR33B	-0.484979	2.58752	-2.00936	0.0657822	0.130146	-5.64826	693120	microRNA 33b [Source:HGNC Symbol;Acc:HGNC:32791]	17	17813836	17813931	-1
ENSG00000198995	MIR340	2.23312	12.2134	4.8416	0.000324196	0.00187187	0.329258	442908	microRNA 340 [Source:HGNC Symbol;Acc:HGNC:31777]	5	180015303	180015397	-1
ENSG00000199082	MIR342	1.21261	9.75149	2.85407	0.0135788	0.0368801	-3.53533	442909	microRNA 342 [Source:HGNC Symbol;Acc:HGNC:31778]	14	100109655	100109753	1
ENSG00000198984	MIR345	1.07809	8.09034	2.97839	0.0106979	0.030741	-3.4392	442910	microRNA 345 [Source:HGNC Symbol;Acc:HGNC:31779]	14	100307859	100307956	1
ENSG00000228526	MIR34A	2.20756	8.68682	4.59973	0.000501072	0.00255382	-0.320171	407040 106614088	microRNA 34a [Source:HGNC Symbol;Acc:HGNC:31635]	1	9148011	9196983	-1
ENSG00000207811	MIR34B	1.97183	1.61274	10.6565	8.76e-08	2.21e-06	8.2183	407041	microRNA 34b [Source:HGNC Symbol;Acc:HGNC:31636]	11	111512938	111513021	1
ENSG00000207562	MIR34C	2.71089	8.23446	5.51573	0.000100346	0.000714247	1.28951	407042	microRNA 34c [Source:HGNC Symbol;Acc:HGNC:31637]	11	111513439	111513515	1
ENSG00000283484	MIR3529	0.0741702	11.5974	0.1767	0.862474	0.917281	-6.73199	100616238	microRNA 3529 [Source:HGNC Symbol;Acc:HGNC:41564]	15	88611847	88611924	-1
ENSG00000199051	MIR361	-0.230333	9.93362	-0.593376	0.563136	0.689302	-6.69842	494323	microRNA 361 [Source:HGNC Symbol;Acc:HGNC:31867]	X	85903636	85903707	-1
ENSG00000264864	MIR3613	1.15157	6.23272	4.06572	0.00134281	0.00559014	-1.52759	100500908	microRNA 3613 [Source:HGNC Symbol;Acc:HGNC:38964]	13	49996415	49996501	-1
ENSG00000208015	MIR362	2.45928	7.41246	7.67596	3.56e-06	4.9e-05	4.65465	574030	microRNA 362 [Source:HGNC Symbol;Acc:HGNC:32022]	X	50008964	50009028	1
ENSG00000280968	MIR3653	-0.725983	0.948033	-3.25515	0.00628385	0.0200323	-3.39277	100500833	microRNA 3653 [Source:HGNC Symbol;Acc:HGNC:38971]	22	29333158	29333267	-1
ENSG00000199130	MIR365A	0.780328	3.35661	2.75393	0.0164451	0.0430142	-4.27484	100126355	microRNA 365a [Source:HGNC Symbol;Acc:HGNC:33692]	16	14309285	14309371	1
ENSG00000228768	MIR365B	0.432968	3.04963	1.63274	0.126555	0.221226	-6.20012	100126356	microRNA 365b [Source:HGNC Symbol;Acc:HGNC:33693]	17	31571142	31575659	1
ENSG00000264342	MIR3660	-0.693646	2.37076	-3.34648	0.00527237	0.0172918	-3.20726	100500825	microRNA 3660 [Source:HGNC Symbol;Acc:HGNC:38985]	5	90016621	90016720	-1
ENSG00000266751	MIR3661	-0.0680137	3.42	-0.297248	0.770985	0.850958	-7.43194	100500905	microRNA 3661 [Source:HGNC Symbol;Acc:HGNC:38892]	5	134225757	134225852	1
ENSG00000263813	MIR3679	-1.96876	0.288411	-6.62242	1.68e-05	0.000169576	2.82149	100500878	microRNA 3679 [Source:HGNC Symbol;Acc:HGNC:38979]	2	134127125	134127192	1
ENSG00000264089	MIR3681	1.05812	2.59036	4.54443	0.000554087	0.00274495	-0.891968	100500884	microRNA 3681 [Source:HGNC Symbol;Acc:HGNC:38994]	2	12199130	12199201	1
ENSG00000277437	MIR3687-1	-0.259421	0.329793	-1.41936	0.179382	0.288526	-6.49651	100500815	microRNA 3687-1 [Source:HGNC Symbol;Acc:HGNC:38946]	21	8208844	8208904	1
ENSG00000264063	MIR3687-2	-0.259421	0.329793	-1.41936	0.179382	0.288526	-6.49651	103504728	microRNA 3687-2 [Source:HGNC Symbol;Acc:HGNC:50835]	21	8987370	8987430	1
ENSG00000264105	MIR3688-1	0.76061	1.14707	3.66547	0.00286278	0.0103976	-2.5855	100500881	microRNA 3688-1 [Source:HGNC Symbol;Acc:HGNC:38986]	4	159128802	159128894	-1
ENSG00000283379	MIR3688-2	0.76061	1.14707	3.66547	0.00286278	0.0103976	-2.5855	100616303	microRNA 3688-2 [Source:HGNC Symbol;Acc:HGNC:41735]	4	159128805	159128891	1
ENSG00000265083	MIR3691	-0.828003	2.50114	-4.18717	0.00107022	0.00460231	-1.58885	100500900	microRNA 3691 [Source:HGNC Symbol;Acc:HGNC:38909]	6	5148233	5148322	-1
ENSG00000199168	MIR374A	1.89449	10.2147	4.36659	0.000767558	0.00360767	-0.648705	442919	microRNA 374a [Source:HGNC Symbol;Acc:HGNC:31788]	X	74287286	74287357	-1
ENSG00000212027	MIR374B	0.695916	10.6868	1.7655	0.100998	0.184366	-5.3349	100126317	microRNA 374b [Source:HGNC Symbol;Acc:HGNC:33665]	X	74218547	74218618	-1
ENSG00000283534	MIR374C	0.695907	10.6868	1.76547	0.101003	0.184366	-5.33494	100500807	microRNA 374c [Source:HGNC Symbol;Acc:HGNC:38907]	X	74218549	74218618	1
ENSG00000198973	MIR375	-4.5436	0.134233	-14.6686	1.88e-09	1.06e-07	12.1694	494324	microRNA 375 [Source:HGNC Symbol;Acc:HGNC:31868]	2	219001645	219001708	-1
ENSG00000199047	MIR378A	-1.22139	9.43342	-3.01178	0.0100333	0.0291354	-3.26819	494327	microRNA 378a [Source:HGNC Symbol;Acc:HGNC:31871]	5	149732825	149732890	1
ENSG00000264803	MIR378C	-1.3487	4.21453	-5.71666	7.16e-05	0.000540761	1.31392	100422867	microRNA 378c [Source:HGNC Symbol;Acc:HGNC:38374]	10	130962588	130962668	-1
ENSG00000263631	MIR378D1	-1.17733	1.68596	-6.11154	3.75e-05	0.000324815	1.86891	100616201	microRNA 378d-1 [Source:HGNC Symbol;Acc:HGNC:41550]	4	5923275	5923328	-1
ENSG00000264448	MIR378D2	-1.10336	1.74944	-5.94708	4.9e-05	0.000398989	1.59222	100616169	microRNA 378d-2 [Source:HGNC Symbol;Acc:HGNC:41797]	8	93915734	93916682	-1
ENSG00000199088	MIR379	-7.5384	-0.820582	-11.2706	4.53e-08	1.42e-06	9.05279	494328	microRNA 379 [Source:HGNC Symbol;Acc:HGNC:31872]	14	101022066	101022132	1
ENSG00000199020	MIR381	-8.37467	0.987866	-15.2223	1.19e-09	7.76e-08	12.3841	494330	microRNA 381 [Source:HGNC Symbol;Acc:HGNC:31874]	14	101045920	101045994	1
ENSG00000283170	MIR382	-6.60173	-2.24402	-14.5826	2.02e-09	1.09e-07	11.9483	494331	microRNA 382 [Source:HGNC Symbol;Acc:HGNC:31875]	14	101054306	101054381	1
ENSG00000266320	MIR3909	-1.88362	3.71789	-6.20553	3.23e-05	0.000287403	2.10842	100500826	microRNA 3909 [Source:HGNC Symbol;Acc:HGNC:38987]	22	35335640	35335758	1
ENSG00000264249	MIR3912	-0.0687351	1.47819	-0.314657	0.758028	0.843123	-7.49315	100500831	microRNA 3912 [Source:HGNC Symbol;Acc:HGNC:38923]	5	171386656	171386760	-1
ENSG00000264405	MIR3913-1	0.36683	3.56719	1.87862	0.0829604	0.156626	-5.79107	100500903	microRNA 3913-1 [Source:HGNC Symbol;Acc:HGNC:38884]	12	69584722	69584823	-1
ENSG00000283677	MIR3913-2	0.36683	3.56719	1.87862	0.0829604	0.156626	-5.79107	100500868	microRNA 3913-2 [Source:HGNC Symbol;Acc:HGNC:38953]	12	69584723	69584822	1
ENSG00000264295	MIR3922	-1.06734	1.34398	-3.79782	0.00222569	0.00841684	-2.34847	100500843	microRNA 3922 [Source:HGNC Symbol;Acc:HGNC:38895]	12	104591633	104591716	1
ENSG00000264141	MIR3928	-1.41712	2.39444	-7.07639	8.45e-06	9.69e-05	3.43905	100500901	microRNA 3928 [Source:HGNC Symbol;Acc:HGNC:38933]	22	31160062	31160119	-1
ENSG00000265641	MIR3929	-3.83728	-1.11847	-8.29208	1.53e-06	2.33e-05	5.60979	100500864	microRNA 3929 [Source:HGNC Symbol;Acc:HGNC:38945]	18	35934088	35934142	-1
ENSG00000266509	MIR3934	2.13681	1.36374	10.0337	1.77e-07	3.68e-06	7.50568	100500873	microRNA 3934 [Source:HGNC Symbol;Acc:HGNC:38965]	6	33698128	33698234	1
ENSG00000264013	MIR3938	-1.11084	1.02885	-4.45604	0.000651216	0.00312004	-1.08953	100500875	microRNA 3938 [Source:HGNC Symbol;Acc:HGNC:38972]	3	55852492	55852594	-1
ENSG00000265828	MIR3939	-0.698904	0.423671	-2.325	0.0369487	0.0829003	-5.09008	100500857	microRNA 3939 [Source:HGNC Symbol;Acc:HGNC:38931]	6	166997807	166997912	-1
ENSG00000265395	MIR3944	-0.126499	0.72333	-0.551084	0.590945	0.712297	-7.37574	100500911	microRNA 3944 [Source:HGNC Symbol;Acc:HGNC:38898]	10	133371556	133371663	-1
ENSG00000199107	MIR409	-7.29773	-0.763124	-14.5043	2.16e-09	1.14e-07	11.8871	574413	microRNA 409 [Source:HGNC Symbol;Acc:HGNC:32055]	14	101065300	101065378	1
ENSG00000199109	MIR411	-6.34056	-2.37578	-17.1082	2.8e-10	2.24e-08	13.6786	693121	microRNA 411 [Source:HGNC Symbol;Acc:HGNC:32792]	14	101023325	101023420	1
ENSG00000202566	MIR421	0.270162	8.19422	0.810658	0.432188	0.56796	-6.69492	693122	microRNA 421 [Source:HGNC Symbol;Acc:HGNC:32793]	X	74218377	74218461	-1
ENSG00000199032	MIR425	1.35725	10.1878	3.44592	0.00435638	0.0147415	-2.38712	494337	microRNA 425 [Source:HGNC Symbol;Acc:HGNC:31882]	3	49020148	49020234	-1
ENSG00000266104	MIR4326	0.180158	5.56003	0.668137	0.515762	0.649488	-7.05795	100422945	microRNA 4326 [Source:HGNC Symbol;Acc:HGNC:38314]	20	63286808	63286866	1
ENSG00000266110	MIR4423	-0.983185	1.29185	-4.17176	0.00110139	0.00468751	-1.63211	100616481	microRNA 4423 [Source:HGNC Symbol;Acc:HGNC:41784]	1	85133794	85133873	1
ENSG00000266109	MIR4440	0.108436	0.164747	0.618591	0.546898	0.674635	-7.25944	100616397	microRNA 4440 [Source:HGNC Symbol;Acc:HGNC:41740]	2	239068817	239068914	-1
ENSG00000264408	MIR4470	-0.0490964	1.7991	-0.271483	0.790293	0.864645	-7.50264	100616484	microRNA 4470 [Source:HGNC Symbol;Acc:HGNC:41833]	8	61714788	61714859	1
ENSG00000263790	MIR4473	-1.08113	5.2064	-4.69347	0.0004229	0.0022479	-0.44407	100616229	microRNA 4473 [Source:HGNC Symbol;Acc:HGNC:41540]	9	20411148	20411238	-1
ENSG00000264941	MIR4474	-1.72712	-0.140021	-6.11854	3.71e-05	0.000323437	2.07552	100616441	microRNA 4474 [Source:HGNC Symbol;Acc:HGNC:41821]	9	20502265	20502342	-1
ENSG00000266852	MIR4482	-1.00527	2.13597	-4.73777	0.000390469	0.00213508	-0.554183	100616323	microRNA 4482 [Source:HGNC Symbol;Acc:HGNC:41792]	10	104268336	104268405	-1
ENSG00000266704	MIR4498	-0.859511	0.556265	-3.17929	0.0072707	0.022289	-3.51655	100616179	microRNA 4498 [Source:HGNC Symbol;Acc:HGNC:41838]	12	120155434	120155499	-1
ENSG00000251856	MIR449C	0.549617	0.636749	3.06	0.0091452	0.0270444	-3.72629	100313923	microRNA 449c [Source:HGNC Symbol;Acc:HGNC:37302]	5	55172262	55172353	-1
ENSG00000264712	MIR4504	-0.230295	0.57606	-1.00748	0.332133	0.470918	-7.00341	100616261	microRNA 4504 [Source:HGNC Symbol;Acc:HGNC:41624]	14	50299855	50299946	-1
ENSG00000199132	MIR450A1	2.28813	5.83708	10.1872	1.48e-07	3.28e-06	7.82907	554214	microRNA 450a-1 [Source:HGNC Symbol;Acc:HGNC:28008]	X	134540341	134540431	-1
ENSG00000207755	MIR450A2	2.26071	5.88007	9.89578	2.08e-07	4.21e-06	7.48682	574505	microRNA 450a-2 [Source:HGNC Symbol;Acc:HGNC:32137]	X	134540508	134540607	-1
ENSG00000216001	MIR450B	2.81887	9.48223	7.40963	5.2e-06	6.6e-05	4.36748	100126302	microRNA 450b [Source:HGNC Symbol;Acc:HGNC:33642]	X	134540185	134540262	-1
ENSG00000283160	MIR4521	0.91971	9.8766	1.99578	0.0674005	0.132742	-5.03741	100616406	microRNA 4521 [Source:HGNC Symbol;Acc:HGNC:41813]	17	8186945	8187004	1
ENSG00000279010	MIR4534	2.21166	1.66516	7.3547	5.63e-06	7.08e-05	3.88414	100616146 102465492	microRNA 4534 [Source:HGNC Symbol;Acc:HGNC:41692]	22	37948352	38002889	1
ENSG00000211514	MIR454	1.2588	9.79899	3.45425	0.00428734	0.0145484	-2.40002	768216	microRNA 454 [Source:HGNC Symbol;Acc:HGNC:33137]	17	59137758	59137872	-1
ENSG00000207726	MIR455	-0.724159	9.31335	-2.07098	0.0588771	0.11954	-4.9628	619556	microRNA 455 [Source:HGNC Symbol;Acc:HGNC:32344]	9	114209434	114209529	1
ENSG00000266415	MIR4636	-3.1199	-0.226004	-9.15209	5.08e-07	8.73e-06	6.62245	100616326	microRNA 4636 [Source:HGNC Symbol;Acc:HGNC:41798]	5	9053816	9053895	-1
ENSG00000264732	MIR4638	-0.201403	0.282959	-1.21711	0.24525	0.369066	-6.74075	100616342	microRNA 4638 [Source:HGNC Symbol;Acc:HGNC:41841]	5	181222566	181222633	-1
ENSG00000266750	MIR4645	0.686607	0.993962	2.91081	0.0121796	0.0338594	-4.02887	100616285	microRNA 4645 [Source:HGNC Symbol;Acc:HGNC:41689]	6	2854031	2854107	-1
ENSG00000266776	MIR4646	0.571774	1.46662	2.44374	0.029599	0.0697591	-4.90532	100616230	microRNA 4646 [Source:HGNC Symbol;Acc:HGNC:41543]	6	31701029	31701091	-1
ENSG00000265423	MIR4652	-0.343158	2.3782	-1.33216	0.205745	0.322143	-6.64581	100616206	microRNA 4652 [Source:HGNC Symbol;Acc:HGNC:41615]	7	93716928	93717005	1
ENSG00000266038	MIR4659A	-1.2713	0.361625	-5.97551	4.67e-05	0.000385989	1.69059	100616348	microRNA 4659a [Source:HGNC Symbol;Acc:HGNC:41857]	8	6745164	6745244	1
ENSG00000283386	MIR4659B	-1.2713	0.361625	-5.97551	4.67e-05	0.000385989	1.69059	100616372	microRNA 4659b [Source:HGNC Symbol;Acc:HGNC:41530]	8	6745168	6745240	-1
ENSG00000265376	MIR466	-1.85578	0.435479	-7.15407	7.54e-06	8.81e-05	3.61976	100423038	microRNA 466 [Source:HGNC Symbol;Acc:HGNC:38359]	3	31161704	31161787	-1
ENSG00000266194	MIR4661	0.371471	0.558898	2.00368	0.0664549	0.131162	-5.62975	100616245	microRNA 4661 [Source:HGNC Symbol;Acc:HGNC:41582]	8	91205485	91205559	1
ENSG00000283609	MIR4662A	-1.64999	0.533019	-5.00438	0.000242875	0.00149652	-0.0199543	100616221	microRNA 4662a [Source:HGNC Symbol;Acc:HGNC:41826]	8	124821985	124822051	1
ENSG00000263735	MIR4662B	-1.64999	0.533019	-5.00438	0.000242875	0.00149652	-0.0199543	100616255	microRNA 4662b [Source:HGNC Symbol;Acc:HGNC:41607]	8	124821978	124822058	-1
ENSG00000265660	MIR4664	0.300401	2.19567	1.36998	0.193948	0.306383	-6.59909	100616318	microRNA 4664 [Source:HGNC Symbol;Acc:HGNC:41777]	8	143733083	143733153	-1
ENSG00000263575	MIR4665	-2.99299	0.592549	-12.8941	9.04e-09	3.91e-07	10.6356	100616288	microRNA 4665 [Source:HGNC Symbol;Acc:HGNC:41696]	9	6007826	6007904	1
ENSG00000265201	MIR4677	1.60182	4.35438	7.17642	7.29e-06	8.68e-05	3.70588	100616343	microRNA 4677 [Source:HGNC Symbol;Acc:HGNC:41844]	1	243346176	243346255	1
ENSG00000265422	MIR4684	-1.12288	0.784989	-5.22551	0.000164995	0.00107551	0.33683	100616391	microRNA 4684 [Source:HGNC Symbol;Acc:HGNC:41695]	1	22719517	22719598	1
ENSG00000266041	MIR4690	-0.111003	0.997201	-0.595418	0.561812	0.688953	-7.36044	100616292	microRNA 4690 [Source:HGNC Symbol;Acc:HGNC:41707]	11	65636310	65636369	1
ENSG00000266531	MIR4706	0.559504	1.06375	2.23847	0.0433665	0.0943926	-5.26026	100616490	microRNA 4706 [Source:HGNC Symbol;Acc:HGNC:41576]	14	65044688	65044769	1
ENSG00000266593	MIR4713	0.0484246	2.22501	0.195993	0.847653	0.908934	-7.51943	100616369	microRNA 4713 [Source:HGNC Symbol;Acc:HGNC:41899]	15	51242190	51242264	1
ENSG00000264004	MIR4717	-0.426801	1.03789	-2.25225	0.0422786	0.0924309	-5.25244	100616241	microRNA 4717 [Source:HGNC Symbol;Acc:HGNC:41571]	16	2274620	2274691	1
ENSG00000273627	MIR4726	0.192859	0.727465	0.827813	0.42275	0.559077	-7.17146	100616153	microRNA 4726 [Source:HGNC Symbol;Acc:HGNC:41722]	17	38719691	38719748	1
ENSG00000265178	MIR4728	1.31207	0.044686	6.115	3.73e-05	0.000324146	2.06548	100616132	microRNA 4728 [Source:HGNC Symbol;Acc:HGNC:41632]	17	39726495	39726561	1
ENSG00000266392	MIR4740	-0.0193565	0.368449	-0.0895898	0.929982	0.957425	-7.49648	100616294	microRNA 4740 [Source:HGNC Symbol;Acc:HGNC:41711]	17	81400716	81400778	-1
ENSG00000266618	MIR4742	0.272844	2.07736	1.36531	0.195373	0.308045	-6.60757	100616468	microRNA 4742 [Source:HGNC Symbol;Acc:HGNC:41565]	1	224398227	224398311	-1
ENSG00000266437	MIR4746	-0.480262	4.5383	-1.887	0.0817473	0.154926	-5.70047	100616371	microRNA 4746 [Source:HGNC Symbol;Acc:HGNC:41904]	19	4445978	4446048	1
ENSG00000263409	MIR4747	0.355461	1.0839	1.96353	0.0713937	0.138918	-5.72914	100616337	microRNA 4747 [Source:HGNC Symbol;Acc:HGNC:41827]	19	4932687	4932740	1
ENSG00000264616	MIR4755	-1.48984	-0.0420664	-6.24308	3.04e-05	0.000272661	2.23179	100616434	microRNA 4755 [Source:HGNC Symbol;Acc:HGNC:41815]	20	34049119	34049190	1
ENSG00000272543	MIR4787	-0.389865	1.63426	-1.31524	0.211212	0.32842	-6.67261	100616138	microRNA 4787 [Source:HGNC Symbol;Acc:HGNC:41653]	3	50675080	50675163	1
ENSG00000265850	MIR4797	0.264789	0.733998	1.00085	0.33521	0.474195	-7.01056	100616216	microRNA 4797 [Source:HGNC Symbol;Acc:HGNC:41758]	3	197293878	197293948	-1
ENSG00000207805	MIR483	-4.81291	-0.185763	-11.4581	3.72e-08	1.2e-06	9.26215	619552	microRNA 483 [Source:HGNC Symbol;Acc:HGNC:32340]	11	2134134	2134209	-1
ENSG00000274705	MIR486-1	-7.14567	2.08752	-20.2945	3.29e-11	4.29e-09	15.9813	619554	microRNA 486-1 [Source:HGNC Symbol;Acc:HGNC:32342]	8	41660441	41660508	-1
ENSG00000283450	MIR486-2	-7.14567	2.08752	-20.2945	3.29e-11	4.29e-09	15.9813	102465696	microRNA 486-2 [Source:HGNC Symbol;Acc:HGNC:50213]	8	41660444	41660507	1
ENSG00000202609	MIR488	-3.50795	3.12899	-13.7408	4.17e-09	2.03e-07	11.3881	574441	microRNA 488 [Source:HGNC Symbol;Acc:HGNC:32073]	1	177029363	177029445	-1
ENSG00000207609	MIR491	-0.0909562	3.68144	-0.396173	0.698419	0.797595	-7.37422	574444	microRNA 491 [Source:HGNC Symbol;Acc:HGNC:32076]	9	20716105	20716188	1
ENSG00000267532	MIR497HG	-1.03755	2.79153	-5.9489	4.88e-05	0.000398989	1.6142	406971 574456 100506755	mir-497-195 cluster host gene [Source:HGNC Symbol;Acc:HGNC:39523]	17	7015818	7019659	-1
ENSG00000207635	MIR499A	-0.808646	3.9136	-3.23986	0.00647129	0.0204655	-3.31636	574501	microRNA 499a [Source:HGNC Symbol;Acc:HGNC:32133]	20	34990376	34990497	1
ENSG00000283441	MIR499B	-0.808646	3.9136	-3.23986	0.00647129	0.0204655	-3.31636	100616134	microRNA 499b [Source:HGNC Symbol;Acc:HGNC:41640]	20	34990400	34990472	-1
ENSG00000263909	MIR5000	1.19728	1.22965	4.48457	0.000618077	0.00298436	-1.01396	100846995	microRNA 5000 [Source:HGNC Symbol;Acc:HGNC:43464]	2	75090812	75090914	1
ENSG00000266383	MIR5002	-0.191888	0.611492	-0.882811	0.393409	0.533666	-7.12386	100847021	microRNA 5002 [Source:HGNC Symbol;Acc:HGNC:43470]	3	124132929	124133025	1
ENSG00000264796	MIR5009	0.176537	0.182994	0.756081	0.463115	0.596845	-7.16248	100846993	microRNA 5009 [Source:HGNC Symbol;Acc:HGNC:43458]	15	89883931	89884030	-1
ENSG00000207785	MIR500A	1.95588	9.72301	4.83836	0.000326075	0.00187398	0.183739	574502	microRNA 500a [Source:HGNC Symbol;Acc:HGNC:32134]	X	50008431	50008514	1
ENSG00000239057	MIR500B	3.00943	6.83933	9.21053	4.72e-07	8.3e-06	6.69386	100422911	microRNA 500b [Source:HGNC Symbol;Acc:HGNC:38223]	X	50010672	50010750	1
ENSG00000211538	MIR501	1.90385	9.2172	4.91739	0.000283284	0.00167869	0.293243	574503	microRNA 501 [Source:HGNC Symbol;Acc:HGNC:32135]	X	50009722	50009805	1
ENSG00000272080	MIR502	1.62514	6.76503	5.48619	0.000105499	0.000742387	1.1225	574504	microRNA 502 [Source:HGNC Symbol;Acc:HGNC:32136]	X	50014598	50014683	1
ENSG00000208005	MIR503	0.928714	6.65805	3.10742	0.00834841	0.0250655	-3.3238	574506	microRNA 503 [Source:HGNC Symbol;Acc:HGNC:32138]	X	134546328	134546398	-1
ENSG00000223749	MIR503HG	1.03307	7.06977	3.54015	0.00363689	0.0127187	-2.45941	84848 494336	MIR503 host gene [Source:HGNC Symbol;Acc:HGNC:28258]	X	134543337	134546711	-1
ENSG00000207800	MIR504	-0.183706	8.88731	-0.495593	0.628474	0.742932	-6.84504	574507	microRNA 504 [Source:HGNC Symbol;Acc:HGNC:32139]	X	138667711	138667793	-1
ENSG00000207633	MIR505	-0.15059	6.05045	-0.564673	0.581932	0.705327	-7.07695	574508	microRNA 505 [Source:HGNC Symbol;Acc:HGNC:32140]	X	139924148	139924231	-1
ENSG00000207731	MIR506	5.14074	2.97751	15.8622	7.15e-10	5.21e-08	13.1835	574511	microRNA 506 [Source:HGNC Symbol;Acc:HGNC:32143]	X	147230720	147230843	-1
ENSG00000207589	MIR508	5.8765	4.24577	21.2446	1.85e-11	3.91e-09	16.6625	574513	microRNA 508 [Source:HGNC Symbol;Acc:HGNC:32145]	X	147236913	147237027	-1
ENSG00000208000	MIR509-1	5.88531	2.77731	23.114	6.36e-12	3.51e-09	17.6409	574514	microRNA 509-1 [Source:HGNC Symbol;Acc:HGNC:32146]	X	147260532	147260625	-1
ENSG00000212013	MIR509-2	5.88531	2.77731	23.114	6.36e-12	3.51e-09	17.6409	100126301	microRNA 509-2 [Source:HGNC Symbol;Acc:HGNC:33641]	X	147258760	147258850	-1
ENSG00000212014	MIR509-3	5.85009	5.96545	22.635	8.29e-12	3.51e-09	17.224	100126337	microRNA 509-3 [Source:HGNC Symbol;Acc:HGNC:33675]	X	147259652	147259726	-1
ENSG00000264966	MIR5094	0.566457	0.472888	3.21894	0.0067369	0.0210432	-3.39974	100847059	microRNA 5094 [Source:HGNC Symbol;Acc:HGNC:43519]	15	89850637	89850721	-1
ENSG00000207641	MIR510	5.39808	-0.634311	14.8364	1.63e-09	9.63e-08	12.1385	574515	microRNA 510 [Source:HGNC Symbol;Acc:HGNC:32147]	X	147272335	147272408	-1
ENSG00000207873	MIR513A1	5.31364	-0.873636	12.1478	1.85e-08	7.19e-07	9.9017	574509	microRNA 513a-1 [Source:HGNC Symbol;Acc:HGNC:32141]	X	147213463	147213591	-1
ENSG00000207984	MIR513A2	5.15468	-0.781535	11.5171	3.5e-08	1.14e-06	9.29835	574510	microRNA 513a-2 [Source:HGNC Symbol;Acc:HGNC:32142]	X	147225826	147225952	-1
ENSG00000207871	MIR513B	5.93519	-1.92527	13.8365	3.84e-09	1.9e-07	11.3663	100313822	microRNA 513b [Source:HGNC Symbol;Acc:HGNC:33935]	X	147199044	147199127	-1
ENSG00000216171	MIR513C	5.28102	-0.857312	10.4718	1.08e-07	2.59e-06	8.22057	100302114	microRNA 513c [Source:HGNC Symbol;Acc:HGNC:33934]	X	147189704	147189787	-1
ENSG00000207868	MIR514A1	5.76618	4.86215	20.6268	2.68e-11	3.91e-09	16.2824	574516	microRNA 514a-1 [Source:HGNC Symbol;Acc:HGNC:32148]	X	147279247	147279344	-1
ENSG00000207866	MIR514A2	5.76633	4.86222	20.6272	2.68e-11	3.91e-09	16.2826	574517	microRNA 514a-2 [Source:HGNC Symbol;Acc:HGNC:32149]	X	147281943	147282030	-1
ENSG00000207867	MIR514A3	5.76633	4.86222	20.6272	2.68e-11	3.91e-09	16.2826	574518	microRNA 514a-3 [Source:HGNC Symbol;Acc:HGNC:32150]	X	147284641	147284728	-1
ENSG00000252583	MIR514B	4.82926	0.305026	15.189	1.22e-09	7.76e-08	12.4867	100422847	microRNA 514b [Source:HGNC Symbol;Acc:HGNC:38292]	X	147250151	147250230	-1
ENSG00000207758	MIR532	2.08526	12.3555	4.33434	0.000814614	0.0038	-0.582304	693124	microRNA 532 [Source:HGNC Symbol;Acc:HGNC:32795]	X	50003148	50003238	1
ENSG00000207784	MIR542	3.51805	7.64772	8.75202	8.4e-07	1.37e-05	6.14391	664617	microRNA 542 [Source:HGNC Symbol;Acc:HGNC:32534]	X	134541341	134541437	-1
ENSG00000283682	MIR548AH	1.03592	1.79939	3.95822	0.00164343	0.00660842	-2.03423	100616254	microRNA 548ah [Source:HGNC Symbol;Acc:HGNC:41605]	4	76575551	76575626	1
ENSG00000264402	MIR548AL	1.10451	0.287577	5.31888	0.000140423	0.000942624	0.623239	100616215	microRNA 548al [Source:HGNC Symbol;Acc:HGNC:41736]	11	74399237	74399333	1
ENSG00000265144	MIR548AM	2.0085	3.61499	8.13977	1.88e-06	2.8e-05	5.07953	100616428	microRNA 548am [Source:HGNC Symbol;Acc:HGNC:41637]	X	16627012	16627085	-1
ENSG00000264539	MIR548AR	0.200441	0.11875	0.861281	0.404727	0.543098	-7.05736	100847035	microRNA 548ar [Source:HGNC Symbol;Acc:HGNC:43455]	13	114244505	114244561	1
ENSG00000263750	MIR548AV	1.02316	-0.507635	3.78984	0.00225965	0.00852945	-2.04021	100847083	microRNA 548av [Source:HGNC Symbol;Acc:HGNC:43537]	18	72853321	72853382	-1
ENSG00000276147	MIR548AY	0.550311	0.385145	2.53575	0.0248911	0.0604464	-4.67204	102465247	microRNA 548ay [Source:HGNC Symbol;Acc:HGNC:49943]	3	32506283	32506389	-1
ENSG00000212036	MIR548BA	4.01843	2.91063	15.0548	1.36e-09	8.24e-08	12.5318	102465854	microRNA 548ba [Source:HGNC Symbol;Acc:HGNC:50260]	2	49059603	49059658	1
ENSG00000221214	MIR548E	0.41441	4.8108	1.80015	0.0951307	0.175457	-5.81066	100313921	microRNA 548e [Source:HGNC Symbol;Acc:HGNC:35275]	10	110988926	110989013	1
ENSG00000221594	MIR548F1	-0.836248	1.18857	-3.80438	0.00219819	0.00832555	-2.33712	100302192	microRNA 548f-1 [Source:HGNC Symbol;Acc:HGNC:35305]	10	54607874	54607957	-1
ENSG00000221760	MIR548J	-2.20635	0.330093	-7.16063	7.46e-06	8.81e-05	3.67787	100313914	microRNA 548j [Source:HGNC Symbol;Acc:HGNC:35276]	22	26555212	26555323	-1
ENSG00000221333	MIR548K	-0.185043	4.5265	-0.735559	0.475094	0.609744	-7.10415	100313770	microRNA 548k [Source:HGNC Symbol;Acc:HGNC:35285]	11	70283955	70284070	1
ENSG00000221230	MIR548L	-0.429232	1.89541	-1.94015	0.0744214	0.143457	-5.76528	100302275	microRNA 548l [Source:HGNC Symbol;Acc:HGNC:35292]	11	94466495	94466580	-1
ENSG00000221669	MIR548N	0.233659	2.75509	1.06005	0.308468	0.444488	-6.94181	100302152	microRNA 548n [Source:HGNC Symbol;Acc:HGNC:35330]	7	34940760	34940834	-1
ENSG00000221510	MIR548O	-0.0865105	4.91635	-0.387894	0.704387	0.80198	-7.27439	100313829	microRNA 548o [Source:HGNC Symbol;Acc:HGNC:35333]	7	102405742	102405855	-1
ENSG00000275453	MIR548O2	-0.086483	4.91543	-0.387703	0.704525	0.80198	-7.27455	100616190	microRNA 548o-2 [Source:HGNC Symbol;Acc:HGNC:41882]	20	38516563	38516632	1
ENSG00000221263	MIR548P	1.25322	0.74088	6.8284	1.22e-05	0.00013004	3.09986	100302288	microRNA 548p [Source:HGNC Symbol;Acc:HGNC:35351]	5	100816482	100816565	-1
ENSG00000265056	MIR548S	0.571837	0.39704	2.72447	0.0173959	0.0449787	-4.32657	100422862	microRNA 548s [Source:HGNC Symbol;Acc:HGNC:38354]	2	11767444	11767525	1
ENSG00000212017	MIR548U	-0.407111	-0.0193151	-1.62845	0.127468	0.222665	-6.14472	100422884	microRNA 548u [Source:HGNC Symbol;Acc:HGNC:38316]	6	57390132	57390212	1
ENSG00000265841	MIR548X	-6.66727	-2.08428	-13.3267	6.06e-09	2.73e-07	10.9457	100422920	microRNA 548x [Source:HGNC Symbol;Acc:HGNC:38248]	21	18686090	18686164	-1
ENSG00000207771	MIR550A1	-0.649192	2.90502	-2.96043	0.0110733	0.0314548	-3.9274	693133 100500883	microRNA 550a-1 [Source:HGNC Symbol;Acc:HGNC:32804]	7	30289794	30289890	1
ENSG00000207573	MIR550A2	-0.651928	2.90633	-2.9741	0.0107865	0.0309239	-3.90142	693134 100500830	microRNA 550a-2 [Source:HGNC Symbol;Acc:HGNC:32805]	7	32732981	32733077	1
ENSG00000212024	MIR550A3	-0.471659	2.13129	-2.10179	0.0556822	0.115129	-5.49805	100616354	microRNA 550a-3 [Source:HGNC Symbol;Acc:HGNC:41870]	7	29680734	29680828	-1
ENSG00000207776	MIR551A	-1.49332	2.4574	-7.52859	4.38e-06	5.87e-05	4.1277	693135	microRNA 551a [Source:HGNC Symbol;Acc:HGNC:32806]	1	3560695	3560790	-1
ENSG00000207717	MIR551B	-1.48332	4.48457	-6.40506	2.35e-05	0.000223193	2.49027	693136	microRNA 551b [Source:HGNC Symbol;Acc:HGNC:32807]	3	168551854	168551949	1
ENSG00000207729	MIR556	-2.3605	1.90553	-10.947	6.39e-08	1.76e-06	8.53342	693141	microRNA 556 [Source:HGNC Symbol;Acc:HGNC:32812]	1	162342546	162342640	1
ENSG00000263540	MIR5582	0.105949	0.388449	0.468638	0.647108	0.756079	-7.3806	100847020	microRNA 5582 [Source:HGNC Symbol;Acc:HGNC:43461]	11	46753125	46753192	-1
ENSG00000266124	MIR5587	-0.395171	0.711715	-1.84993	0.087236	0.163329	-5.90897	100847028	microRNA 5587 [Source:HGNC Symbol;Acc:HGNC:43508]	16	535316	535368	1
ENSG00000207951	MIR561	2.83107	2.17286	12.0881	1.97e-08	7.27e-07	9.78638	693146	microRNA 561 [Source:HGNC Symbol;Acc:HGNC:32817]	2	188297492	188297588	1
ENSG00000266756	MIR5680	0.341216	-0.00196478	1.25498	0.231631	0.353076	-6.61631	100847001	microRNA 5680 [Source:HGNC Symbol;Acc:HGNC:43492]	8	102125432	102125515	1
ENSG00000264477	MIR5682	-4.80727	-1.58998	-10.1709	1.51e-07	3.28e-06	7.89079	100847043	microRNA 5682 [Source:HGNC Symbol;Acc:HGNC:43477]	3	121049640	121049715	1
ENSG00000265135	MIR5687	0.826068	0.0499565	3.62062	0.00311845	0.0111948	-2.53018	100847019	microRNA 5687 [Source:HGNC Symbol;Acc:HGNC:43457]	5	55508850	55508926	-1
ENSG00000264857	MIR5696	-0.188955	0.952373	-0.833816	0.419479	0.555641	-7.1842	100847007	microRNA 5696 [Source:HGNC Symbol;Acc:HGNC:43516]	2	101309450	101309534	1
ENSG00000263511	MIR5699	0.198576	1.93609	0.975246	0.34728	0.486724	-7.05101	100847086	microRNA 5699 [Source:HGNC Symbol;Acc:HGNC:43456]	10	641689	641778	-1
ENSG00000207697	MIR573	-0.194351	0.690313	-1.05811	0.309317	0.445194	-6.9595	693158	microRNA 573 [Source:HGNC Symbol;Acc:HGNC:32829]	4	24520192	24520290	-1
ENSG00000207944	MIR574	-0.861781	5.5598	-3.31956	0.00555223	0.0180484	-3.02587	693159	microRNA 574 [Source:HGNC Symbol;Acc:HGNC:32830]	4	38868032	38868127	1
ENSG00000207988	MIR576	-0.336139	5.22678	-1.33439	0.205036	0.321439	-6.43233	693161	microRNA 576 [Source:HGNC Symbol;Acc:HGNC:32832]	4	109488698	109488795	1
ENSG00000207931	MIR577	-2.00446	6.92625	-6.073	3.99e-05	0.000339711	2.13159	693162	microRNA 577 [Source:HGNC Symbol;Acc:HGNC:32833]	4	114656759	114656854	1
ENSG00000207956	MIR579	0.208837	1.67085	0.898195	0.385455	0.525755	-7.12317	693164	microRNA 579 [Source:HGNC Symbol;Acc:HGNC:32835]	5	32394378	32394475	-1
ENSG00000207756	MIR580	0.617005	0.0723491	2.7024	0.0181436	0.0467655	-4.30341	693165	microRNA 580 [Source:HGNC Symbol;Acc:HGNC:32836]	5	36147892	36147988	-1
ENSG00000207627	MIR581	-0.213236	1.27059	-0.835695	0.418459	0.554586	-7.18509	693166	microRNA 581 [Source:HGNC Symbol;Acc:HGNC:32837]	5	53951504	53951599	-1
ENSG00000202601	MIR582	3.79212	8.0396	12.8621	9.31e-09	3.91e-07	10.6248	693167	microRNA 582 [Source:HGNC Symbol;Acc:HGNC:32838]	5	59703606	59703703	-1
ENSG00000207714	MIR584	0.939635	9.77445	2.32312	0.037078	0.0831151	-4.49379	693169	microRNA 584 [Source:HGNC Symbol;Acc:HGNC:32840]	5	149062313	149062409	-1
ENSG00000207619	MIR585	-4.65255	-0.754591	-9.60826	2.91e-07	5.68e-06	7.24939	693170	microRNA 585 [Source:HGNC Symbol;Acc:HGNC:32841]	5	169263601	169263694	-1
ENSG00000207632	MIR588	1.37192	0.561686	5.23651	0.000161879	0.00105798	0.444367	693173	microRNA 588 [Source:HGNC Symbol;Acc:HGNC:32844]	6	126484631	126484713	1
ENSG00000207973	MIR589	0.411465	7.55428	1.24979	0.233461	0.355429	-6.30834	693174	microRNA 589 [Source:HGNC Symbol;Acc:HGNC:32845]	7	5495819	5495917	-1
ENSG00000207741	MIR590	1.60976	5.36799	5.78341	6.41e-05	0.000494573	1.52749	693175	microRNA 590 [Source:HGNC Symbol;Acc:HGNC:32846]	7	74191198	74191294	1
ENSG00000207692	MIR592	-3.03091	6.70288	-10.8747	6.91e-08	1.84e-06	8.63469	693177	microRNA 592 [Source:HGNC Symbol;Acc:HGNC:32848]	7	127058088	127058184	-1
ENSG00000207701	MIR597	-0.990588	2.5588	-4.16173	0.00112218	0.00475965	-1.63439	693182	microRNA 597 [Source:HGNC Symbol;Acc:HGNC:32853]	8	9741672	9741768	1
ENSG00000207600	MIR598	-0.441457	7.45815	-1.39442	0.186622	0.297084	-6.13861	693183	microRNA 598 [Source:HGNC Symbol;Acc:HGNC:32854]	8	11035206	11035302	-1
ENSG00000207813	MIR605	-2.72416	-0.121658	-11.1257	5.28e-08	1.56e-06	8.89224	693190	microRNA 605 [Source:HGNC Symbol;Acc:HGNC:32861]	10	51299573	51299655	1
ENSG00000275110	MIR6087	0.0175286	0.455194	0.0625539	0.951076	0.970014	-7.50816	102464835	microRNA 6087 [Source:HGNC Symbol;Acc:HGNC:50045]	X	109054542	109054590	1
ENSG00000207571	MIR615	-2.59639	9.82298	-6.4844	2.08e-05	0.000201778	2.9778	693200	microRNA 615 [Source:HGNC Symbol;Acc:HGNC:32871]	12	54033950	54034045	1
ENSG00000208022	MIR618	-2.27374	2.9358	-10.5584	9.77e-08	2.39e-06	8.1226	693203	microRNA 618 [Source:HGNC Symbol;Acc:HGNC:32874]	12	80935736	80935833	-1
ENSG00000207952	MIR624	0.369164	0.870453	1.66793	0.119281	0.211344	-6.18037	693209	microRNA 624 [Source:HGNC Symbol;Acc:HGNC:32880]	14	31014646	31014742	-1
ENSG00000207781	MIR625	-0.565883	5.82101	-2.27453	0.0405735	0.0894929	-4.93769	693210	microRNA 625 [Source:HGNC Symbol;Acc:HGNC:32881]	14	65471102	65471186	1
ENSG00000207965	MIR629	0.102079	8.88107	0.265304	0.794946	0.869352	-6.93762	693214	microRNA 629 [Source:HGNC Symbol;Acc:HGNC:32885]	15	70079372	70079468	-1
ENSG00000207631	MIR641	-1.13067	3.56319	-5.73378	6.96e-05	0.000530053	1.29529	693226	microRNA 641 [Source:HGNC Symbol;Acc:HGNC:32897]	19	40282543	40282641	-1
ENSG00000207773	MIR642A	-1.28271	1.30264	-6.96788	9.93e-06	0.000110307	3.25469	693227	microRNA 642a [Source:HGNC Symbol;Acc:HGNC:32898]	19	45674928	45675024	1
ENSG00000283212	MIR642B	-1.28271	1.30264	-6.96788	9.93e-06	0.000110307	3.25469	100500845	microRNA 642b [Source:HGNC Symbol;Acc:HGNC:38902]	19	45674932	45675008	-1
ENSG00000275344	MIR6503	2.36784	-0.740154	6.93858	1.04e-05	0.00011372	3.63201	102465250	microRNA 6503 [Source:HGNC Symbol;Acc:HGNC:49968]	11	60209071	60209156	-1
ENSG00000275770	MIR6505	-0.414483	2.98363	-2.16647	0.0494948	0.104875	-5.36403	102466657	microRNA 6505 [Source:HGNC Symbol;Acc:HGNC:50104]	12	48132797	48132867	1
ENSG00000207628	MIR651	0.352776	6.43725	0.9626	0.353355	0.491447	-6.72629	723779	microRNA 651 [Source:HGNC Symbol;Acc:HGNC:32907]	X	8126965	8127061	1
ENSG00000275259	MIR6511A1	-0.0705715	0.266825	-0.368312	0.718583	0.810675	-7.41528	102466268	microRNA 6511a-1 [Source:HGNC Symbol;Acc:HGNC:50119]	16	14925937	14926003	1
ENSG00000278221	MIR6511A2	-0.0705715	0.266825	-0.368312	0.718583	0.810675	-7.41528	102466812	microRNA 6511a-2 [Source:HGNC Symbol;Acc:HGNC:50150]	16	16324588	16324654	1
ENSG00000276311	MIR6511A3	-0.0705715	0.266825	-0.368312	0.718583	0.810675	-7.41528	102465683	microRNA 6511a-3 [Source:HGNC Symbol;Acc:HGNC:50265]	16	16368876	16368942	1
ENSG00000273613	MIR6511A4	-0.0705715	0.266825	-0.368312	0.718583	0.810675	-7.41528	102465684	microRNA 6511a-4 [Source:HGNC Symbol;Acc:HGNC:50188]	16	18344013	18344079	-1
ENSG00000283346	MIR6511B2	-0.111836	1.63234	-0.618098	0.547213	0.674688	-7.34115	102465985	microRNA 6511b-2 [Source:HGNC Symbol;Acc:HGNC:50230]	16	15134075	15134145	-1
ENSG00000274066	MIR6514	-0.426452	1.45978	-2.03981	0.0622811	0.124713	-5.61132	102465257	microRNA 6514 [Source:HGNC Symbol;Acc:HGNC:50147]	11	62792702	62792771	-1
ENSG00000274417	MIR6515	0.314791	2.74026	1.75049	0.103638	0.188897	-6.04289	102466659	microRNA 6515 [Source:HGNC Symbol;Acc:HGNC:50227]	19	12940484	12940540	1
ENSG00000208013	MIR652	0.896915	7.48064	2.74871	0.0166099	0.0432625	-3.92283	724022	microRNA 652 [Source:HGNC Symbol;Acc:HGNC:32908]	X	110055329	110055426	1
ENSG00000208014	MIR653	-0.649995	4.23135	-2.86705	0.0132454	0.0362931	-4	724023	microRNA 653 [Source:HGNC Symbol;Acc:HGNC:32909]	7	93482760	93482855	-1
ENSG00000207934	MIR654	-8.62859	-1.66432	-17.859	1.64e-10	1.56e-08	14.1342	724024	microRNA 654 [Source:HGNC Symbol;Acc:HGNC:32910]	14	101040219	101040299	1
ENSG00000207696	MIR659	-0.294206	2.72197	-1.55729	0.143462	0.242563	-6.33545	724029	microRNA 659 [Source:HGNC Symbol;Acc:HGNC:32915]	22	37847678	37847774	-1
ENSG00000207970	MIR660	2.45158	8.09285	6.55759	1.85e-05	0.000185169	3.00527	724030	microRNA 660 [Source:HGNC Symbol;Acc:HGNC:32916]	X	50013241	50013337	1
ENSG00000227195	MIR663AHG	0.0313739	1.46989	0.17688	0.862335	0.917281	-7.52878	284801 724033	MIR663A host gene [Source:HGNC Symbol;Acc:HGNC:27662]	20	26186920	26251526	-1
ENSG00000281696	MIR664A	0.0813061	4.39412	0.374575	0.71403	0.808123	-7.32417	100302234	microRNA 664a [Source:HGNC Symbol;Acc:HGNC:35370]	1	220200538	220200619	-1
ENSG00000211568	MIR670	2.53473	0.926258	9.24702	4.51e-07	8.04e-06	6.60613	100313777	microRNA 670 [Source:HGNC Symbol;Acc:HGNC:37304]	11	43559656	43559753	1
ENSG00000278791	MIR6723	-0.855563	0.439362	-4.71371	0.000407747	0.00219284	-0.57791	102465432	microRNA 6723 [Source:HGNC Symbol;Acc:HGNC:50152]	1	632325	632413	-1
ENSG00000275950	MIR6724-1	-1.18338	0.365468	-6.44642	2.2e-05	0.0002108	2.46921	102465433	microRNA 6724-1 [Source:HGNC Symbol;Acc:HGNC:50837]	21	8205315	8205406	1
ENSG00000274060	MIR6724-2	-1.18338	0.365468	-6.44642	2.2e-05	0.0002108	2.46921	103504727	microRNA 6724-2 [Source:HGNC Symbol;Acc:HGNC:50832]	21	8249505	8249596	1
ENSG00000277379	MIR6724-3	-1.18338	0.365468	-6.44642	2.2e-05	0.0002108	2.46921	103504739	microRNA 6724-3 [Source:HGNC Symbol;Acc:HGNC:50842]	21	8388362	8388453	1
ENSG00000275692	MIR6724-4	-1.18338	0.365468	-6.44642	2.2e-05	0.0002108	2.46921	103504733	microRNA 6724-4 [Source:HGNC Symbol;Acc:HGNC:50830]	21	8432530	8432621	1
ENSG00000278073	MIR6726	0.208314	0.408161	0.993216	0.338776	0.477875	-6.98532	102465434	microRNA 6726 [Source:HGNC Symbol;Acc:HGNC:50009]	1	1296110	1296170	-1
ENSG00000276584	MIR6737	0.318276	1.13998	1.56561	0.141507	0.240077	-6.33743	102465441	microRNA 6737 [Source:HGNC Symbol;Acc:HGNC:50273]	1	153962351	153962420	-1
ENSG00000277817	MIR6738	-0.239238	0.495545	-1.1742	0.261428	0.386461	-6.81777	102465442	microRNA 6738 [Source:HGNC Symbol;Acc:HGNC:49939]	1	155951273	155951336	-1
ENSG00000277681	MIR6739	-0.23364	1.22923	-1.25751	0.230743	0.352157	-6.74959	102466724	microRNA 6739 [Source:HGNC Symbol;Acc:HGNC:50165]	1	201863373	201863447	1
ENSG00000275207	MIR6740	0.0342332	0.0807034	0.146666	0.885652	0.931365	-7.43934	102465443	microRNA 6740 [Source:HGNC Symbol;Acc:HGNC:50082]	1	202003124	202003236	1
ENSG00000276102	MIR6747	-0.451507	1.38048	-2.1112	0.0547399	0.113655	-5.49363	102465447	microRNA 6747 [Source:HGNC Symbol;Acc:HGNC:50027]	11	62567011	62567071	-1
ENSG00000283621	MIR6759	0.884717	0.250507	4.37339	0.000758009	0.00359004	-1.12182	102466729	microRNA 6759 [Source:HGNC Symbol;Acc:HGNC:50063]	12	57748618	57748682	-1
ENSG00000211991	MIR676	-0.84501	3.31083	-3.59455	0.00327764	0.0116648	-2.68188	100500887	microRNA 676 [Source:HGNC Symbol;Acc:HGNC:38880]	X	70022857	70022923	1
ENSG00000274111	MIR6777	0.327139	0.321031	1.61131	0.131173	0.226705	-6.2057	102465466	microRNA 6777 [Source:HGNC Symbol;Acc:HGNC:50173]	17	17813480	17813545	-1
ENSG00000276770	MIR6780B	0.73065	1.20983	4.68633	0.000428381	0.00227216	-0.646871	102466746	microRNA 6780b [Source:HGNC Symbol;Acc:HGNC:50237]	6	43434542	43434620	1
ENSG00000275107	MIR6782	0.805118	-0.108229	2.33229	0.0364516	0.0820825	-4.90002	102465469	microRNA 6782 [Source:HGNC Symbol;Acc:HGNC:50270]	17	44207771	44207839	-1
ENSG00000278223	MIR6783	0.119503	3.21592	0.544886	0.595079	0.715553	-7.33646	102466734	microRNA 6783 [Source:HGNC Symbol;Acc:HGNC:50159]	17	44934618	44934681	-1
ENSG00000275711	MIR6795	0.194324	0.172451	0.627268	0.541371	0.669818	-7.24823	102465476	microRNA 6795 [Source:HGNC Symbol;Acc:HGNC:50031]	19	15179283	15179350	-1
ENSG00000273898	MIR6798	0.0738207	3.58668	0.258459	0.80011	0.873126	-7.42968	102466738	microRNA 6798 [Source:HGNC Symbol;Acc:HGNC:50013]	19	49009906	49009972	1
ENSG00000277588	MIR6806	0.439261	2.71843	2.14033	0.0519132	0.108422	-5.41271	102465484	microRNA 6806 [Source:HGNC Symbol;Acc:HGNC:49937]	19	58334688	58334751	1
ENSG00000275924	MIR6807	-0.440273	0.211422	-2.3572	0.0348	0.07952	-5.00509	102465976	microRNA 6807 [Source:HGNC Symbol;Acc:HGNC:50191]	19	58550285	58550376	1
ENSG00000275167	MIR6815	-5.5703	-2.11059	-10.0848	1.67e-07	3.59e-06	7.79462	102465489	microRNA 6815 [Source:HGNC Symbol;Acc:HGNC:50225]	21	45478266	45478326	1
ENSG00000275818	MIR6818	-0.284557	1.69584	-1.4659	0.1665	0.273489	-6.47514	102466742	microRNA 6818 [Source:HGNC Symbol;Acc:HGNC:49940]	22	30007049	30007113	1
ENSG00000274494	MIR6832	1.13191	0.168359	5.03573	0.000229829	0.00142678	0.13573	102466745	microRNA 6832 [Source:HGNC Symbol;Acc:HGNC:50140]	6	31633787	31633858	1
ENSG00000273836	MIR6842	-0.359914	2.13486	-1.9721	0.0703119	0.137136	-5.71353	102465507	microRNA 6842 [Source:HGNC Symbol;Acc:HGNC:50254]	8	27433370	27433434	1
ENSG00000278204	MIR6857	-0.416599	0.291328	-2.04305	0.0619193	0.12448	-5.55672	102465516	microRNA 6857 [Source:HGNC Symbol;Acc:HGNC:50263]	X	53405673	53405765	-1
ENSG00000276350	MIR6858	0.253856	0.475645	1.30835	0.213469	0.331098	-6.63988	102465517	microRNA 6858 [Source:HGNC Symbol;Acc:HGNC:50250]	X	154450320	154450386	1
ENSG00000275360	MIR6868	-0.209231	3.06809	-1.10396	0.289675	0.421447	-6.88173	102466753	microRNA 6868 [Source:HGNC Symbol;Acc:HGNC:50096]	17	76098019	76098076	-1
ENSG00000276169	MIR6871	0.142795	0.593161	0.628175	0.540795	0.66944	-7.31155	102466912	microRNA 6871 [Source:HGNC Symbol;Acc:HGNC:49964]	20	41169023	41169078	1
ENSG00000283419	MIR6874	0.146591	0.583355	0.600929	0.558245	0.68658	-7.32861	102466203	microRNA 6874 [Source:HGNC Symbol;Acc:HGNC:50146]	7	5711840	5711910	-1
ENSG00000273932	MIR6877	0.0329637	1.46723	0.160465	0.874988	0.92503	-7.53179	102465528	microRNA 6877 [Source:HGNC Symbol;Acc:HGNC:50205]	9	133051996	133052059	1
ENSG00000275411	MIR6882	0.339507	1.39253	1.84874	0.0874178	0.163422	-5.9144	102465531	microRNA 6882 [Source:HGNC Symbol;Acc:HGNC:49928]	15	74840642	74840707	-1
ENSG00000274552	MIR6889	0.434435	-0.130173	1.83753	0.0891453	0.165527	-5.75467	102466758	microRNA 6889 [Source:HGNC Symbol;Acc:HGNC:50014]	22	41252992	41253050	-1
ENSG00000277474	MIR6894	0.290674	0.0293915	1.0648	0.306393	0.442013	-6.8396	102466759	microRNA 6894 [Source:HGNC Symbol;Acc:HGNC:49938]	X	53198889	53198945	-1
ENSG00000211997	MIR708	-5.23296	5.59146	-22.0826	1.13e-11	3.51e-09	17.052	100126333	microRNA 708 [Source:HGNC Symbol;Acc:HGNC:33654]	11	79402022	79402109	-1
ENSG00000276712	MIR7111	0.321648	1.56458	1.13003	0.278932	0.407378	-6.88953	102465668	microRNA 7111 [Source:HGNC Symbol;Acc:HGNC:50073]	6	35470508	35470579	1
ENSG00000276866	MIR7151	-0.105705	0.619267	-0.539472	0.598702	0.718569	-7.37489	102466814	microRNA 7151 [Source:HGNC Symbol;Acc:HGNC:50170]	10	67403351	67403410	-1
ENSG00000276081	MIR7156	-3.26281	1.37795	-14.6638	1.88e-09	1.06e-07	12.1885	102466995	microRNA 7156 [Source:HGNC Symbol;Acc:HGNC:50023]	1	77060143	77060202	1
ENSG00000207703	MIR7-2	0.0741702	11.5974	0.1767	0.862474	0.917281	-6.73199	407044	microRNA 7-2 [Source:HGNC Symbol;Acc:HGNC:31639]	15	88611825	88611934	1
ENSG00000207630	MIR7-3	0.0747191	11.5933	0.178073	0.861417	0.917281	-6.73205	407045	microRNA 7-3 [Source:HGNC Symbol;Acc:HGNC:31640]	19	4770670	4770779	1
ENSG00000266297	MIR744	-0.6192	10.0173	-1.41215	0.181451	0.291287	-5.88878	100126313	microRNA 744 [Source:HGNC Symbol;Acc:HGNC:33658]	17	12081899	12081996	1
ENSG00000211575	MIR760	-0.432461	6.20185	-1.31404	0.211602	0.328613	-6.36262	100126348	microRNA 760 [Source:HGNC Symbol;Acc:HGNC:33666]	1	93846832	93846911	1
ENSG00000211581	MIR765	0.529098	-0.273837	2.3048	0.0383611	0.0856811	-4.93534	768220	microRNA 765 [Source:HGNC Symbol;Acc:HGNC:33141]	1	156936131	156936244	-1
ENSG00000211578	MIR766	0.37551	5.21928	1.20329	0.250371	0.374108	-6.58862	768218	microRNA 766 [Source:HGNC Symbol;Acc:HGNC:33139]	X	119646738	119646848	-1
ENSG00000211583	MIR767	-5.71565	1.82102	-18.5895	9.92e-11	9.82e-09	15.0851	768215	microRNA 767 [Source:HGNC Symbol;Acc:HGNC:33136]	X	152393421	152393529	-1
ENSG00000211580	MIR769	1.63429	10.7466	3.14342	0.00779004	0.0237051	-2.91822	768217	microRNA 769 [Source:HGNC Symbol;Acc:HGNC:33138]	19	46018932	46019049	1
ENSG00000278520	MIR7851	-0.0241213	2.5693	-0.0973645	0.923926	0.953568	-7.52722	102467003	microRNA 7851 [Source:HGNC Symbol;Acc:HGNC:50127]	12	42323700	42323859	-1
ENSG00000277255	MIR7854	-0.23404	0.38357	-1.27454	0.224838	0.3457	-6.68674	102465840	microRNA 7854 [Source:HGNC Symbol;Acc:HGNC:50047]	16	81533902	81533966	1
ENSG00000274713	MIR7974	-0.703074	7.04066	-2.16961	0.049211	0.104363	-5.00001	102465856	microRNA 7974 [Source:HGNC Symbol;Acc:HGNC:49992]	19	11495544	11495622	-1
ENSG00000276083	MIR7976	0.266547	1.28628	1.26644	0.22763	0.348911	-6.73232	102465857	microRNA 7976 [Source:HGNC Symbol;Acc:HGNC:50092]	3	127587111	127587176	-1
ENSG00000215939	MIR873	-1.41373	4.7759	-5.13941	0.000191648	0.00122349	0.337846	100126316	microRNA 873 [Source:HGNC Symbol;Acc:HGNC:33663]	9	28888879	28888955	-1
ENSG00000216009	MIR874	-0.438293	6.16635	-1.4898	0.160191	0.264705	-6.13714	100126343	microRNA 874 [Source:HGNC Symbol;Acc:HGNC:33643]	5	137647572	137647649	-1
ENSG00000215966	MIR876	-0.489602	1.59241	-2.34338	0.0357071	0.0807048	-5.08808	100126310	microRNA 876 [Source:HGNC Symbol;Acc:HGNC:33653]	9	28863626	28863706	-1
ENSG00000216101	MIR877	0.791448	8.6974	1.79549	0.0959021	0.176617	-5.45353	100126314	microRNA 877 [Source:HGNC Symbol;Acc:HGNC:33660]	6	30584332	30584417	1
ENSG00000216077	MIR887	0.376203	5.38636	1.37379	0.19279	0.304942	-6.3643	100126347	microRNA 887 [Source:HGNC Symbol;Acc:HGNC:33661]	5	15935182	15935260	1
ENSG00000207933	MIR9-1	5.05075	10.2781	10.9673	6.25e-08	1.74e-06	8.73162	407046	microRNA 9-1 [Source:HGNC Symbol;Acc:HGNC:31641]	1	156420341	156420429	-1
ENSG00000283638	MIR92A2	0.608156	15.3964	1.04265	0.31616	0.452675	-5.92278	406899 406981 407049 574031 574032 574033	microRNA 92a-2 [Source:HGNC Symbol;Acc:HGNC:31644]	X	134168911	134174089	-1
ENSG00000231064	MIR92B	-2.78662	11.2844	-5.80968	6.14e-05	0.000479518	1.95207	693235	microRNA 92b [Source:HGNC Symbol;Acc:HGNC:32920]	1	155195004	155205495	1
ENSG00000207757	MIR93	0.500549	11.5786	1.01572	0.328341	0.466462	-6.22209	407050	microRNA 93 [Source:HGNC Symbol;Acc:HGNC:31645]	7	100093768	100093847	-1
ENSG00000215973	MIR933	-0.473734	1.4449	-2.95495	0.0111905	0.031715	-3.96657	100126350	microRNA 933 [Source:HGNC Symbol;Acc:HGNC:33676]	2	175167633	175167709	-1
ENSG00000255571	MIR9-3HG	5.05375	10.2834	10.9717	6.22e-08	1.74e-06	8.73591	254559 407051	MIR9-3 host gene [Source:HGNC Symbol;Acc:HGNC:27388]	15	89361579	89398487	1
ENSG00000260778	MIR940	0.338378	1.58452	1.58636	0.136731	0.233451	-6.30875	100126328 106660606	microRNA 940 [Source:HGNC Symbol;Acc:HGNC:33683]	16	2268155	2273418	1
ENSG00000283206	MIR941-1	-0.148881	6.11002	-0.529341	0.605513	0.72317	-7.09122	100126329	microRNA 941-1 [Source:HGNC Symbol;Acc:HGNC:33684]	20	63919449	63919520	1
ENSG00000216141	MIR941-2	-0.132723	7.04574	-0.428878	0.67505	0.779231	-7.04904	100126339	microRNA 941-2 [Source:HGNC Symbol;Acc:HGNC:33685]	20	63919505	63919576	1
ENSG00000283513	MIR941-3	-0.132723	7.04574	-0.428878	0.67505	0.779231	-7.04904	100126352	microRNA 941-3 [Source:HGNC Symbol;Acc:HGNC:33686]	20	63919561	63919632	1
ENSG00000216195	MIR941-4	-0.132615	7.0458	-0.428498	0.67532	0.779231	-7.04921	100126330	microRNA 941-4 [Source:HGNC Symbol;Acc:HGNC:33687]	20	63919756	63919827	1
ENSG00000275842	MIR941-5	-0.132723	7.04574	-0.428878	0.67505	0.779231	-7.04904	103504732	microRNA 941-5 [Source:HGNC Symbol;Acc:HGNC:50845]	20	63919868	63919939	1
ENSG00000215930	MIR942	0.0280791	3.50619	0.141928	0.889318	0.933693	-7.46126	100126331	microRNA 942 [Source:HGNC Symbol;Acc:HGNC:33688]	1	117094643	117094728	1
ENSG00000207807	MIR95	-1.04329	6.46465	-3.5968	0.00326361	0.0116316	-2.40896	407052	microRNA 95 [Source:HGNC Symbol;Acc:HGNC:31647]	4	8005301	8005381	-1
ENSG00000199158	MIR96	-2.52573	0.599242	-8.84693	7.45e-07	1.23e-05	6.05657	407053	microRNA 96 [Source:HGNC Symbol;Acc:HGNC:31648]	7	129774692	129774769	-1
ENSG00000271886	MIR98	0.729268	2.01594	3.35834	0.00515366	0.0169982	-3.18886	407054	microRNA 98 [Source:HGNC Symbol;Acc:HGNC:31649]	X	53556223	53556341	-1
ENSG00000207638	MIR99A	-1.42218	12.1463	-3.13858	0.00786288	0.0238681	-2.83639	407055	microRNA 99a [Source:HGNC Symbol;Acc:HGNC:31650]	21	16539089	16539169	1
ENSG00000207550	MIR99B	-2.57887	11.5606	-5.45161	0.000111888	0.000778499	1.3611	407056	microRNA 99b [Source:HGNC Symbol;Acc:HGNC:31651]	19	51692612	51692681	1
ENSG00000199165	MIRLET7A1	0.717816	6.28879	2.50371	0.0264423	0.0635281	-4.48225	406881	microRNA let-7a-1 [Source:HGNC Symbol;Acc:HGNC:31476]	9	94175957	94176036	1
ENSG00000198975	MIRLET7A2	0.734685	6.22059	2.53746	0.0248111	0.0604298	-4.42761	406882	microRNA let-7a-2 [Source:HGNC Symbol;Acc:HGNC:31477]	11	122146522	122146593	-1
ENSG00000197182	MIRLET7BHG	0.735979	6.25522	2.55239	0.0241208	0.0590973	-4.39723	400931 406883 406884 100616143	MIRLET7B host gene [Source:HGNC Symbol;Acc:HGNC:37189]	22	46053869	46113928	1
ENSG00000199030	MIRLET7C	0.218837	6.34788	0.726696	0.480325	0.614181	-6.93772	406885	microRNA let-7c [Source:HGNC Symbol;Acc:HGNC:31480]	21	16539828	16539911	1
ENSG00000199133	MIRLET7D	0.730338	2.28324	3.40696	0.00469442	0.0157349	-3.08633	406886	microRNA let-7d [Source:HGNC Symbol;Acc:HGNC:31481]	9	94178834	94178920	1
ENSG00000198972	MIRLET7E	-1.20782	8.1503	-3.35218	0.00521491	0.0171518	-2.72836	406887	microRNA let-7e [Source:HGNC Symbol;Acc:HGNC:31482]	19	51692786	51692864	1
ENSG00000199072	MIRLET7F1	1.15123	8.47366	3.27141	0.00609045	0.0195729	-2.85173	406888	microRNA let-7f-1 [Source:HGNC Symbol;Acc:HGNC:31483]	9	94176347	94176433	1
ENSG00000208012	MIRLET7F2	1.01	8.6809	2.81704	0.0145763	0.0393306	-3.69114	406889	microRNA let-7f-2 [Source:HGNC Symbol;Acc:HGNC:31484]	X	53557192	53557274	-1
ENSG00000199150	MIRLET7G	1.18443	7.57799	3.26958	0.00611195	0.0195768	-2.93124	406890	microRNA let-7g [Source:HGNC Symbol;Acc:HGNC:31485]	3	52268278	52268361	-1
ENSG00000199179	MIRLET7I	1.10134	7.90197	3.20632	0.00690238	0.0214446	-3.02397	406891	microRNA let-7i [Source:HGNC Symbol;Acc:HGNC:31486]	12	62603686	62603769	1
ENSG00000156103	MMP16	0.7008	0.0161104	3.06788	0.00900774	0.0267532	-3.58944	4325	matrix metallopeptidase 16 [Source:HGNC Symbol;Acc:HGNC:7162]	8	88032009	88328025	-1
ENSG00000079931	MOXD1	5.69624	-2.41432	14.5787	2.02e-09	1.09e-07	11.945	26002	monooxygenase DBH like 1 [Source:HGNC Symbol;Acc:HGNC:21063]	6	132296055	132401545	-1
ENSG00000133030	MPRIP	-0.120535	0.0865773	-0.636754	0.535364	0.665317	-7.24129	23164	myosin phosphatase Rho interacting protein [Source:HGNC Symbol;Acc:HGNC:30321]	17	17042545	17217679	1
ENSG00000106591	MRPL32	1.1146	4.64942	4.45111	0.000657124	0.00314227	-0.935097	64983	mitochondrial ribosomal protein L32 [Source:HGNC Symbol;Acc:HGNC:14035]	7	42932200	42948958	1
ENSG00000185608	MRPL40	-0.203853	0.751517	-0.864708	0.402911	0.541221	-7.14956	64976	mitochondrial ribosomal protein L40 [Source:HGNC Symbol;Acc:HGNC:14491]	22	19431902	19436075	1
ENSG00000182180	MRPS16	-0.0237977	2.84785	-0.103297	0.919307	0.950782	-7.51392	51021	mitochondrial ribosomal protein S16 [Source:HGNC Symbol;Acc:HGNC:14048]	10	73248843	73252693	-1
ENSG00000175110	MRPS22	0.379621	3.93301	1.55025	0.145134	0.244889	-6.25346	56945	mitochondrial ribosomal protein S22 [Source:HGNC Symbol;Acc:HGNC:14508]	3	139005806	139357223	1
ENSG00000166961	MS4A15	-0.242055	0.608949	-1.24227	0.236135	0.358618	-6.74802	219995	membrane spanning 4-domains A15 [Source:HGNC Symbol;Acc:HGNC:28573]	11	60756953	60776732	1
ENSG00000116062	MSH6	0.529723	0.31866	2.33519	0.0362553	0.0817891	-5.01796	2956	mutS homolog 6 [Source:HGNC Symbol;Acc:HGNC:7329]	2	47695530	47810101	1
ENSG00000188895	MSL1	-0.715259	1.08689	-4.12724	0.00119678	0.00503298	-1.71775	339287	male specific lethal 1 homolog [Source:HGNC Symbol;Acc:HGNC:27905]	17	40122298	40136916	1
ENSG00000052802	MSMO1	-0.137809	0.513995	-0.772889	0.453446	0.587747	-7.20739	6307	methylsterol monooxygenase 1 [Source:HGNC Symbol;Acc:HGNC:10545]	4	165327623	165343160	1
ENSG00000099810	MTAP	0.564873	-0.327697	2.36048	0.0345875	0.0791805	-4.81892	4507	methylthioadenosine phosphorylase [Source:HGNC Symbol;Acc:HGNC:7413]	9	21802543	21937651	1
ENSG00000198899	MT-ATP6	-0.563587	3.2675	-3.41299	0.0046404	0.015596	-3.03534	4508	mitochondrially encoded ATP synthase 6 [Source:HGNC Symbol;Acc:HGNC:7414]	MT	8527	9207	1
ENSG00000248527	MTATP6P1	-0.737791	1.82108	-4.78676	0.000357602	0.00201313	-0.46724		mitochondrially encoded ATP synthase 6 pseudogene 1 [Source:HGNC Symbol;Acc:HGNC:44575]	1	633696	634376	1
ENSG00000228253	MT-ATP8	0.577779	2.93344	2.94225	0.0114666	0.032276	-3.94764	4509	mitochondrially encoded ATP synthase 8 [Source:HGNC Symbol;Acc:HGNC:7415]	MT	8366	8572	1
ENSG00000240409	MTATP8P1	0.516447	2.65054	2.736	0.0170176	0.044185	-4.34894		mitochondrially encoded ATP synthase 8 pseudogene 1 [Source:HGNC Symbol;Acc:HGNC:44571]	1	633535	633741	1
ENSG00000229604	MTATP8P2	0.672945	2.74913	3.40018	0.00475591	0.0158552	-3.07887		mitochondrially encoded ATP synthase 8 pseudogene 2 [Source:HGNC Symbol;Acc:HGNC:44572]	2	87824942	87825143	1
ENSG00000198804	MT-CO1	-0.648819	4.67354	-3.12963	0.00799936	0.0241639	-3.46702	4512	mitochondrially encoded cytochrome c oxidase I [Source:HGNC Symbol;Acc:HGNC:7419]	MT	5904	7445	1
ENSG00000237973	MTCO1P12	-0.65297	4.18708	-3.25591	0.00627465	0.0200287	-3.26427		mitochondrially encoded cytochrome c oxidase I pseudogene 12 [Source:HGNC Symbol;Acc:HGNC:52014]	1	631074	632616	1
ENSG00000262902	MTCO1P40	-0.620546	1.05987	-2.80048	0.0150456	0.0402026	-4.25902		mitochondrially encoded cytochrome c oxidase I pseudogene 40 [Source:HGNC Symbol;Acc:HGNC:52105]	17	53105734	53106358	1
ENSG00000230916	MTCO1P53	-1.00897	0.728981	-5.44463	0.000113225	0.0007856	0.728108		mitochondrially encoded cytochrome c oxidase I pseudogene 53 [Source:HGNC Symbol;Acc:HGNC:52118]	X	126471705	126472403	1
ENSG00000198712	MT-CO2	-0.552991	4.41237	-2.86009	0.0134232	0.0366099	-3.99869	4513	mitochondrially encoded cytochrome c oxidase II [Source:HGNC Symbol;Acc:HGNC:7421]	MT	7586	8269	1
ENSG00000229344	MTCO2P12	-0.486779	2.68543	-2.87722	0.0129897	0.0358441	-4.0961		mitochondrially encoded cytochrome c oxidase II pseudogene 12 [Source:HGNC Symbol;Acc:HGNC:52028]	1	632757	633438	1
ENSG00000198938	MT-CO3	-0.101307	3.87649	-0.546528	0.593982	0.715262	-7.28347	4514	mitochondrially encoded cytochrome c oxidase III [Source:HGNC Symbol;Acc:HGNC:7422]	MT	9207	9990	1
ENSG00000198744	MTCO3P12	0.748598	2.5731	3.85465	0.00199847	0.00768965	-2.20983		mitochondrially encoded cytochrome c oxidase III pseudogene 12 [Source:HGNC Symbol;Acc:HGNC:52042]	1	634376	634922	1
ENSG00000198727	MT-CYB	-0.532685	4.30169	-2.85963	0.013435	0.0366099	-4.0084	4519	mitochondrially encoded cytochrome b [Source:HGNC Symbol;Acc:HGNC:7427]	MT	14747	15887	1
ENSG00000143033	MTF2	0.337688	-0.173209	1.46252	0.167409	0.274617	-6.30122	22823	metal response element binding transcription factor 2 [Source:HGNC Symbol;Acc:HGNC:29535]	1	93079235	93139081	1
ENSG00000087053	MTMR2	0.342878	-0.00111698	1.30754	0.213738	0.331307	-6.54299	8898	myotubularin related protein 2 [Source:HGNC Symbol;Acc:HGNC:7450]	11	95832882	95925315	-1
ENSG00000198888	MT-ND1	0.781989	5.04817	3.67631	0.0028042	0.01026	-2.38045	4535	mitochondrially encoded NADH:ubiquinone oxidoreductase core subunit 1 [Source:HGNC Symbol;Acc:HGNC:7455]	MT	3307	4262	1
ENSG00000225972	MTND1P23	-0.0951475	1.43733	-0.531027	0.604376	0.722161	-7.39715		mitochondrially encoded NADH:ubiquinone oxidoreductase core subunit 1 pseudogene 23 [Source:HGNC Symbol;Acc:HGNC:42092]	1	629062	629433	1
ENSG00000198763	MT-ND2	0.849972	4.58851	4.02556	0.00144788	0.00595747	-1.74903	4536	mitochondrially encoded NADH:ubiquinone oxidoreductase core subunit 2 [Source:HGNC Symbol;Acc:HGNC:7456]	MT	4470	5511	1
ENSG00000225630	MTND2P28	0.96984	4.42927	4.50271	0.000597909	0.0029154	-0.85751		mitochondrially encoded NADH:ubiquinone oxidoreductase core subunit 2 pseudogene 28 [Source:HGNC Symbol;Acc:HGNC:42129]	1	629640	630683	1
ENSG00000198840	MT-ND3	-0.466753	2.00582	-2.37123	0.0339012	0.0782603	-5.0313	4537	mitochondrially encoded NADH:ubiquinone oxidoreductase core subunit 3 [Source:HGNC Symbol;Acc:HGNC:7458]	MT	10059	10404	1
ENSG00000198886	MT-ND4	-0.569157	4.34965	-2.97956	0.0106739	0.0307075	-3.77837	4538	mitochondrially encoded NADH:ubiquinone oxidoreductase core subunit 4 [Source:HGNC Symbol;Acc:HGNC:7459]	MT	10760	12137	1
ENSG00000212907	MT-ND4L	0.124534	3.0658	0.728737	0.479117	0.61333	-7.2251	4539	mitochondrially encoded NADH:ubiquinone oxidoreductase core subunit 4L [Source:HGNC Symbol;Acc:HGNC:7460]	MT	10470	10766	1
ENSG00000247627	MTND4P12	-0.817643	1.66564	-4.79251	0.000353932	0.00199702	-0.460614		mitochondrially encoded NADH:ubiquinone oxidoreductase core subunit 4 pseudogene 12 [Source:HGNC Symbol;Acc:HGNC:42199]	5	134926660	134928036	-1
ENSG00000198786	MT-ND5	-0.646239	4.63464	-3.27125	0.00609234	0.0195729	-3.19929	4540	mitochondrially encoded NADH:ubiquinone oxidoreductase core subunit 5 [Source:HGNC Symbol;Acc:HGNC:7461]	MT	12337	14148	1
ENSG00000248923	MTND5P11	-0.97135	1.31001	-6.26007	2.96e-05	0.000266355	2.1127		mitochondrially encoded NADH:ubiquinone oxidoreductase core subunit 5 pseudogene 11 [Source:HGNC Symbol;Acc:HGNC:42273]	5	134924648	134926459	-1
ENSG00000198695	MT-ND6	-1.1958	5.53994	-4.46637	0.000639004	0.0030794	-0.838087	4541	mitochondrially encoded NADH:ubiquinone oxidoreductase core subunit 6 [Source:HGNC Symbol;Acc:HGNC:7462]	MT	14149	14673	-1
ENSG00000254132	MTND6P3	-0.512507	5.72845	-1.85935	0.0858103	0.160902	-5.63648		mitochondrially encoded NADH:ubiquinone oxidoreductase core subunit 6 pseudogene 3 [Source:HGNC Symbol;Acc:HGNC:39466]	5	94568929	94569470	-1
ENSG00000211459	MT-RNR1	-0.765202	7.02973	-3.1124	0.0082688	0.0249171	-3.28362	4549	mitochondrially encoded 12S RNA [Source:HGNC Symbol;Acc:HGNC:7470]	MT	648	1601	1
ENSG00000210082	MT-RNR2	-0.842956	8.40435	-2.89488	0.0125574	0.0347781	-3.57284	4550	mitochondrially encoded 16S RNA [Source:HGNC Symbol;Acc:HGNC:7471]	MT	1671	3229	1
ENSG00000256618	MTRNR2L1	-1.29245	3.40682	-7.22565	6.79e-06	8.2e-05	3.70975	100462977	MT-RNR2-like 1 [Source:HGNC Symbol;Acc:HGNC:37155]	17	22523111	22524663	1
ENSG00000270188	MTRNR2L11	-1.90193	0.617558	-10.7177	8.19e-08	2.11e-06	8.30813		MT-RNR2-like 11 [Source:HGNC Symbol;Acc:HGNC:37168]	1	237943724	237945275	-1
ENSG00000269028	MTRNR2L12	-1.9687	3.69614	-9.47548	3.42e-07	6.51e-06	6.84528	100462981	MT-RNR2-like 12 [Source:HGNC Symbol;Acc:HGNC:37169]	3	96617188	96618236	-1
ENSG00000270672	MTRNR2L6	-1.96405	1.18355	-9.83566	2.23e-07	4.45e-06	7.23685	100463482	MT-RNR2-like 6 [Source:HGNC Symbol;Acc:HGNC:37163]	7	142666272	142667718	1
ENSG00000255823	MTRNR2L8	-2.07685	3.87627	-10.4131	1.15e-07	2.68e-06	7.98721	100463486 100616263	MT-RNR2-like 8 [Source:HGNC Symbol;Acc:HGNC:37165]	11	10507887	10509189	-1
ENSG00000210127	MT-TA	-0.117797	3.27307	-0.59687	0.560871	0.688539	-7.30246		mitochondrially encoded tRNA alanine [Source:HGNC Symbol;Acc:HGNC:7475]	MT	5587	5655	-1
ENSG00000210140	MT-TC	2.12711	3.00173	7.5016	4.56e-06	6.03e-05	4.13236		mitochondrially encoded tRNA cysteine [Source:HGNC Symbol;Acc:HGNC:7477]	MT	5761	5826	-1
ENSG00000210194	MT-TE	-0.818118	6.48573	-3.19006	0.00712168	0.0219955	-3.18628		mitochondrially encoded tRNA glutamic acid [Source:HGNC Symbol;Acc:HGNC:7479]	MT	14674	14742	-1
ENSG00000210049	MT-TF	-0.345441	6.93863	-1.34062	0.203057	0.318539	-6.25671		mitochondrially encoded tRNA phenylalanine [Source:HGNC Symbol;Acc:HGNC:7481]	MT	577	647	1
ENSG00000210176	MT-TH	-0.61576	4.59429	-2.09655	0.0562138	0.115649	-5.35336		mitochondrially encoded tRNA histidine [Source:HGNC Symbol;Acc:HGNC:7487]	MT	12138	12206	1
ENSG00000210100	MT-TI	0.969066	0.733113	5.0916	0.000208359	0.00130991	0.137889		mitochondrially encoded tRNA isoleucine [Source:HGNC Symbol;Acc:HGNC:7488]	MT	4263	4331	1
ENSG00000210156	MT-TK	1.12796	3.56301	5.09308	0.000207819	0.00130984	0.168028		mitochondrially encoded tRNA lysine [Source:HGNC Symbol;Acc:HGNC:7489]	MT	8295	8364	1
ENSG00000209082	MT-TL1	-0.177763	3.479	-0.673237	0.512617	0.64628	-7.23551		mitochondrially encoded tRNA leucine 1 (UUA/G) [Source:HGNC Symbol;Acc:HGNC:7490]	MT	3230	3304	1
ENSG00000210191	MT-TL2	0.361762	1.31761	1.72508	0.108248	0.196278	-6.10437		mitochondrially encoded tRNA leucine 2 (CUN) [Source:HGNC Symbol;Acc:HGNC:7491]	MT	12266	12336	1
ENSG00000210112	MT-TM	0.715944	1.82959	2.35583	0.0348886	0.0795663	-5.06575		mitochondrially encoded tRNA methionine [Source:HGNC Symbol;Acc:HGNC:7492]	MT	4402	4469	1
ENSG00000210135	MT-TN	0.717422	4.12827	3.61089	0.00317693	0.0113717	-2.58377		mitochondrially encoded tRNA asparagine [Source:HGNC Symbol;Acc:HGNC:7493]	MT	5657	5729	-1
ENSG00000210196	MT-TP	0.278273	4.30732	1.49002	0.160136	0.264705	-6.30634		mitochondrially encoded tRNA proline [Source:HGNC Symbol;Acc:HGNC:7494]	MT	15956	16023	-1
ENSG00000210107	MT-TQ	-0.0117744	4.68596	-0.0504119	0.960562	0.976148	-7.37324		mitochondrially encoded tRNA glutamine [Source:HGNC Symbol;Acc:HGNC:7495]	MT	4329	4400	-1
ENSG00000210151	MT-TS1	-1.60072	2.22388	-8.07812	2.04e-06	3.03e-05	4.91924		mitochondrially encoded tRNA serine 1 (UCN) [Source:HGNC Symbol;Acc:HGNC:7497]	MT	7446	7514	-1
ENSG00000210184	MT-TS2	-0.0738729	6.62856	-0.236905	0.816432	0.885809	-7.15774		mitochondrially encoded tRNA serine 2 (AGU/C) [Source:HGNC Symbol;Acc:HGNC:7498]	MT	12207	12265	1
ENSG00000210195	MT-TT	0.440759	3.52632	2.39652	0.0323371	0.0751397	-4.91819		mitochondrially encoded tRNA threonine [Source:HGNC Symbol;Acc:HGNC:7499]	MT	15888	15953	1
ENSG00000210077	MT-TV	-0.589375	5.03081	-3.01349	0.0100003	0.0291076	-3.65795		mitochondrially encoded tRNA valine [Source:HGNC Symbol;Acc:HGNC:7500]	MT	1602	1670	1
ENSG00000210144	MT-TY	2.63312	4.65938	8.07416	2.05e-06	3.03e-05	5.05586		mitochondrially encoded tRNA tyrosine [Source:HGNC Symbol;Acc:HGNC:7502]	MT	5826	5891	-1
ENSG00000167508	MVD	0.0116656	0.30895	0.0623735	0.951217	0.970014	-7.48836	4597	mevalonate diphosphate decarboxylase [Source:HGNC Symbol;Acc:HGNC:7529]	16	88651935	88663161	-1
ENSG00000134323	MYCN	1.0808	-0.582115	3.23936	0.00647758	0.0204655	-3.0684	4613	v-myc avian myelocytomatosis viral oncogene neuroblastoma derived homolog [Source:HGNC Symbol;Acc:HGNC:7559]	2	15940564	15947007	1
ENSG00000133026	MYH10	0.601378	0.184616	2.43649	0.0300048	0.0704413	-4.81048	4628	myosin heavy chain 10 [Source:HGNC Symbol;Acc:HGNC:7568]	17	8474205	8630761	-1
ENSG00000092841	MYL6	-1.07291	2.13754	-4.60148	0.000499489	0.00255382	-0.807884	4637	myosin light chain 6 [Source:HGNC Symbol;Acc:HGNC:7587]	12	56158161	56163496	1
ENSG00000145555	MYO10	0.242046	0.445636	1.04272	0.316127	0.452675	-6.94144	4651	myosin X [Source:HGNC Symbol;Acc:HGNC:7593]	5	16661914	16936276	-1
ENSG00000071909	MYO3B	0.729268	-0.221824	3.45322	0.00429583	0.0145565	-2.79291	140469	myosin IIIB [Source:HGNC Symbol;Acc:HGNC:15576]	2	170178145	170655171	1
ENSG00000196531	NACA	0.0416177	0.339584	0.196679	0.847127	0.908934	-7.47396	4666	nascent polypeptide-associated complex alpha subunit [Source:HGNC Symbol;Acc:HGNC:7629]	12	56712428	56731628	-1
ENSG00000160877	NACC1	0.563949	0.0427257	2.39858	0.0322125	0.0749205	-4.85028	112939	nucleus accumbens associated 1 [Source:HGNC Symbol;Acc:HGNC:20967]	19	13118103	13141141	1
ENSG00000187109	NAP1L1	0.0101003	0.191806	0.0488665	0.96177	0.976148	-7.47028	4673	nucleosome assembly protein 1 like 1 [Source:HGNC Symbol;Acc:HGNC:7637]	12	76036587	76085033	-1
ENSG00000205531	NAP1L4	0.0447525	0.0407492	0.19647	0.847288	0.908934	-7.41864	4676	nucleosome assembly protein 1 like 4 [Source:HGNC Symbol;Acc:HGNC:7640]	11	2944431	2992377	-1
ENSG00000132780	NASP	-0.0565439	0.219056	-0.251969	0.805014	0.876252	-7.44524	4678	nuclear autoantigenic sperm protein [Source:HGNC Symbol;Acc:HGNC:7644]	1	45583846	45618904	1
ENSG00000162825	NBPF20	-0.708286	0.511717	-3.60678	0.00320201	0.011435	-2.69212	100288142	neuroblastoma breakpoint family member 20 [Source:HGNC Symbol;Acc:HGNC:32000]	1	145289900	145405778	-1
ENSG00000109805	NCAPG	0.0914241	0.145918	0.334452	0.743386	0.832088	-7.40168	64151	non-SMC condensin I complex subunit G [Source:HGNC Symbol;Acc:HGNC:24304]	4	17810902	17844862	1
ENSG00000115053	NCL	-0.31612	1.21875	-1.67323	0.118219	0.209763	-6.19049	4691	nucleolin [Source:HGNC Symbol;Acc:HGNC:7667]	2	231453531	231483641	-1
ENSG00000124151	NCOA3	0.693561	0.996194	3.20585	0.00690867	0.0214446	-3.46697	8202	nuclear receptor coactivator 3 [Source:HGNC Symbol;Acc:HGNC:7670]	20	47501902	47656877	1
ENSG00000107130	NCS1	1.24128	1.04732	5.91818	5.13e-05	0.000410203	1.57786	23413	neuronal calcium sensor 1 [Source:HGNC Symbol;Acc:HGNC:3953]	9	130172578	130237304	1
ENSG00000072864	NDE1	-0.162354	9.92772	-0.396381	0.698269	0.797595	-6.80078	54820 619553	nudE neurodevelopment protein 1 [Source:HGNC Symbol;Acc:HGNC:17619]	16	15643267	15726353	1
ENSG00000070614	NDST1	0.737376	0.0260056	3.48976	0.00400525	0.0137031	-2.78353	3340	N-deacetylase and N-sulfotransferase 1 [Source:HGNC Symbol;Acc:HGNC:7680]	5	150485818	150558211	1
ENSG00000237037	NDUFA6-AS1	0.139437	0.74373	0.706564	0.492338	0.627004	-7.26911		NDUFA6 antisense RNA 1 (head to head) [Source:HGNC Symbol;Acc:HGNC:45273]	22	42090931	42137742	1
ENSG00000166136	NDUFB8	-0.123668	0.782471	-0.575209	0.574995	0.69954	-7.36501	4714	NADH:ubiquinone oxidoreductase subunit B8 [Source:HGNC Symbol;Acc:HGNC:7703]	10	100523740	100530000	-1
ENSG00000115286	NDUFS7	0.385379	4.19881	1.58873	0.136195	0.232933	-6.17717	374291	NADH:ubiquinone oxidoreductase core subunit S7 [Source:HGNC Symbol;Acc:HGNC:7714]	19	1383527	1395589	1
ENSG00000110717	NDUFS8	-0.157411	0.70196	-0.787161	0.445336	0.580884	-7.21109	4728 100616403 102465669	NADH:ubiquinone oxidoreductase core subunit S8 [Source:HGNC Symbol;Acc:HGNC:7715]	11	68030617	68036644	1
ENSG00000245532	NEAT1	-1.13447	0.250268	-5.84856	5.76e-05	0.000454021	1.48497	283131 693197	nuclear paraspeckle assembly transcript 1 (non-protein coding) [Source:HGNC Symbol;Acc:HGNC:30815]	11	65422774	65445540	1
ENSG00000185049	NELFA	-0.142783	2.09117	-0.781868	0.448333	0.582951	-7.22008	7469 100126332	negative elongation factor complex member A [Source:HGNC Symbol;Acc:HGNC:12768]	4	1982714	2041903	-1
ENSG00000204356	NELFE	0.427538	0.807683	1.3224	0.208884	0.326027	-6.647	7936 100302242	negative elongation factor complex member E [Source:HGNC Symbol;Acc:HGNC:13974]	6	31952087	31959110	-1
ENSG00000163608	NEPRO	0.103732	0.291788	0.409752	0.688676	0.78931	-7.39373	25871	nucleolus and neural progenitor protein [Source:HGNC Symbol;Acc:HGNC:24496]	3	113002440	113019861	-1
ENSG00000132688	NES	-1.04767	0.564871	-4.99422	0.000247267	0.00151604	-0.0692611	10763	nestin [Source:HGNC Symbol;Acc:HGNC:7756]	1	156668763	156677397	-1
ENSG00000196712	NF1	0.156405	0.439302	0.810961	0.432021	0.56796	-7.1578	4763	neurofibromin 1 [Source:HGNC Symbol;Acc:HGNC:7765]	17	31094927	31382116	1
ENSG00000102908	NFAT5	-0.580556	0.95952	-2.34348	0.0357004	0.0807048	-5.09109	10725	nuclear factor of activated T-cells 5 [Source:HGNC Symbol;Acc:HGNC:7774]	16	69565094	69704666	1
ENSG00000082641	NFE2L1	0.25028	0.332671	1.4218	0.178686	0.288042	-6.47478	4779	nuclear factor, erythroid 2 like 1 [Source:HGNC Symbol;Acc:HGNC:7781]	17	48048329	48061487	1
ENSG00000230257	NFE4	0.210458	1.46405	0.939111	0.364837	0.504298	-7.08578		nuclear factor, erythroid 4 [Source:HGNC Symbol;Acc:HGNC:29902]	7	102973522	102988856	1
ENSG00000064300	NGFR	1.41487	-0.101281	6.23151	3.09e-05	0.000276729	2.29943	4804	nerve growth factor receptor [Source:HGNC Symbol;Acc:HGNC:7809]	17	49495293	49515017	1
ENSG00000135540	NHSL1	1.01366	-0.405047	4.30981	0.000852375	0.00393893	-1.07801	57224	NHS like 1 [Source:HGNC Symbol;Acc:HGNC:21021]	6	138422043	138692571	-1
ENSG00000140807	NKD1	-3.13293	-0.496128	-10.0356	1.76e-07	3.68e-06	7.71802	85407	naked cuticle homolog 1 [Source:HGNC Symbol;Acc:HGNC:17045]	16	50548330	50649249	1
ENSG00000197885	NKIRAS1	0.172858	0.528662	0.826979	0.423205	0.559309	-7.1563	28512	NFKB inhibitor interacting Ras like 1 [Source:HGNC Symbol;Acc:HGNC:17899]	3	23891660	23946591	-1
ENSG00000136448	NMT1	-0.181687	0.0602278	-1.03464	0.319749	0.456465	-6.90085	4836	N-myristoyltransferase 1 [Source:HGNC Symbol;Acc:HGNC:7857]	17	45051610	45109016	1
ENSG00000053438	NNAT	-0.696237	1.71246	-2.89712	0.0125034	0.034682	-4.07031	4826	neuronatin [Source:HGNC Symbol;Acc:HGNC:7860]	20	37521215	37523693	1
ENSG00000197183	NOL4L	-0.0709551	0.119225	-0.329875	0.746762	0.834339	-7.4049	140688	nucleolar protein 4 like [Source:HGNC Symbol;Acc:HGNC:16106]	20	32443059	32585074	-1
ENSG00000165271	NOL6	1.02538	0.812706	2.58046	0.022873	0.0565592	-4.61441	65083	nucleolar protein 6 [Source:HGNC Symbol;Acc:HGNC:19910]	9	33461441	33473930	-1
ENSG00000147140	NONO	0.218001	1.02007	1.14214	0.274046	0.400843	-6.87548	4841	non-POU domain containing, octamer-binding [Source:HGNC Symbol;Acc:HGNC:7871]	X	71283192	71301168	1
ENSG00000101361	NOP56	0.447367	9.25286	1.28773	0.220345	0.339846	-6.10907	10528 100302138	NOP56 ribonucleoprotein [Source:HGNC Symbol;Acc:HGNC:15911]	20	2652145	2658393	1
ENSG00000055044	NOP58	1.23957	5.32025	4.70462	0.000414479	0.00221264	-0.404967	51602	NOP58 ribonucleoprotein [Source:HGNC Symbol;Acc:HGNC:29926]	2	202265716	202303666	1
ENSG00000260032	NORAD	0.189754	0.280866	0.920167	0.374286	0.513917	-7.03824	647979	non-coding RNA activated by DNA damage [Source:HGNC Symbol;Acc:HGNC:44311]	20	36045622	36050960	-1
ENSG00000134250	NOTCH2	0.728736	0.653249	3.49431	0.00397053	0.0136219	-2.88697	4853	notch 2 [Source:HGNC Symbol;Acc:HGNC:7882]	1	119911553	120069626	-1
ENSG00000074181	NOTCH3	-0.141791	0.280982	-0.703765	0.494022	0.628181	-7.23175	4854	notch 3 [Source:HGNC Symbol;Acc:HGNC:7883]	19	15159038	15200981	-1
ENSG00000119655	NPC2	1.07692	0.0760082	5.74664	6.81e-05	0.00052242	1.41436	10577 100616211	NPC intracellular cholesterol transporter 2 [Source:HGNC Symbol;Acc:HGNC:14537]	14	74476192	74494177	-1
ENSG00000131697	NPHP4	0.473986	0.845874	2.82805	0.0142726	0.0385952	-4.1852	261734	nephrocystin 4 [Source:HGNC Symbol;Acc:HGNC:19104]	1	5862811	5992473	-1
ENSG00000181163	NPM1	-0.168022	0.663568	-0.810604	0.432218	0.56796	-7.18946	4869	nucleophosmin [Source:HGNC Symbol;Acc:HGNC:7910]	5	171387116	171411137	1
ENSG00000185551	NR2F2	0.703293	-0.202735	3.22726	0.00663005	0.0208409	-3.23257	7026 100302258	nuclear receptor subfamily 2 group F member 2 [Source:HGNC Symbol;Acc:HGNC:7976]	15	96325938	96340263	1
ENSG00000118257	NRP2	0.558085	-0.0199522	2.67441	0.0191368	0.0488175	-4.33451	8828	neuropilin 2 [Source:HGNC Symbol;Acc:HGNC:8005]	2	205681990	205798133	1
ENSG00000165671	NSD1	0.515734	0.708956	2.81282	0.0146946	0.0395636	-4.20169	64324	nuclear receptor binding SET domain protein 1 [Source:HGNC Symbol;Acc:HGNC:14234]	5	177133025	177300215	1
ENSG00000165802	NSMF	-0.778248	0.638876	-4.16438	0.00111664	0.00474429	-1.6307	26012 102466223	NMDA receptor synaptonuclear signaling and neuronal migration factor [Source:HGNC Symbol;Acc:HGNC:29843]	9	137447570	137459334	-1
ENSG00000126653	NSRP1	0.48412	13.1309	0.940749	0.364028	0.50346	-6.17859	84081 494335	nuclear speckle splicing regulatory protein 1 [Source:HGNC Symbol;Acc:HGNC:25305]	17	30115521	30186475	1
ENSG00000135778	NTPCR	0.178564	0.276652	0.764757	0.458108	0.59224	-7.17	84284	nucleoside-triphosphatase, cancer-related [Source:HGNC Symbol;Acc:HGNC:28204]	1	232950605	232983882	1
ENSG00000070081	NUCB2	0.194073	1.12987	0.9553	0.356896	0.495811	-7.07188	4925 105376575	nucleobindin 2 [Source:HGNC Symbol;Acc:HGNC:8044]	11	17208153	17349974	1
ENSG00000069275	NUCKS1	-0.235154	1.59813	-1.3874	0.188702	0.299434	-6.58082	64710	nuclear casein kinase and cyclin dependent kinase substrate 1 [Source:HGNC Symbol;Acc:HGNC:29923]	1	205712819	205750276	-1
ENSG00000173598	NUDT4	1.05567	-0.457561	4.29139	0.000881922	0.00403048	-1.09123	11163	nudix hydrolase 4 [Source:HGNC Symbol;Acc:HGNC:8051]	12	93377883	93408146	1
ENSG00000108256	NUFIP2	0.172957	1.16878	0.848515	0.41154	0.547174	-7.16953	57532	NUFIP2, FMR1 interacting protein 2 [Source:HGNC Symbol;Acc:HGNC:17634]	17	29255836	29294118	-1
ENSG00000030066	NUP160	0.254936	-0.00885644	1.14192	0.274133	0.400843	-6.74379	23279	nucleoporin 160 [Source:HGNC Symbol;Acc:HGNC:18017]	11	47778087	47848555	-1
ENSG00000213024	NUP62	0.284978	-0.240508	1.17903	0.259566	0.384493	-6.64769	23636	nucleoporin 62 [Source:HGNC Symbol;Acc:HGNC:8066]	19	49906825	49929763	-1
ENSG00000104904	OAZ1	0.141548	2.25279	0.633118	0.537662	0.666999	-7.32741	4946	ornithine decarboxylase antizyme 1 [Source:HGNC Symbol;Acc:HGNC:8095]	19	2269509	2273490	1
ENSG00000147162	OGT	0.181746	0.153429	0.800665	0.437749	0.573706	-7.12032	8473	O-linked N-acetylglucosamine (GlcNAc) transferase [Source:HGNC Symbol;Acc:HGNC:8127]	X	71533083	71575897	1
ENSG00000247556	OIP5-AS1	-0.375001	0.275035	-1.749	0.103904	0.189243	-6.0219		OIP5 antisense RNA 1 [Source:HGNC Symbol;Acc:HGNC:43563]	15	41283990	41309737	1
ENSG00000091039	OSBPL8	0.0780641	0.0831774	0.336151	0.742134	0.831794	-7.38639	114882	oxysterol binding protein like 8 [Source:HGNC Symbol;Acc:HGNC:16396]	12	76351797	76559809	-1
ENSG00000169860	P2RY1	0.705232	-0.111787	2.69533	0.0183893	0.0472515	-4.26234	5028	purinergic receptor P2Y1 [Source:HGNC Symbol;Acc:HGNC:8539]	3	152834693	152841439	1
ENSG00000070756	PABPC1	0.300774	1.68588	1.50272	0.156868	0.260255	-6.42626	26986 102466854	poly(A) binding protein cytoplasmic 1 [Source:HGNC Symbol;Acc:HGNC:8554]	8	100685816	100722809	-1
ENSG00000255642	PABPC1P4	-0.113337	1.02	-0.524959	0.60847	0.726002	-7.40234		poly(A) binding protein cytoplasmic 1 pseudogene 4 [Source:HGNC Symbol;Acc:HGNC:8563]	12	63822021	63823895	1
ENSG00000007168	PAFAH1B1	0.0721899	0.939658	0.281838	0.782515	0.860697	-7.50127	5048	platelet activating factor acetylhydrolase 1b regulatory subunit 1 [Source:HGNC Symbol;Acc:HGNC:8574]	17	2593210	2685615	1
ENSG00000076641	PAG1	2.74217	-1.22428	5.5998	8.71e-05	0.000636221	1.53585	55824	phosphoprotein membrane anchor with glycosphingolipid microdomains 1 [Source:HGNC Symbol;Acc:HGNC:30043]	8	80967810	81112068	-1
ENSG00000128050	PAICS	0.504386	0.869851	2.22631	0.0443483	0.0962758	-5.27572	10606	phosphoribosylaminoimidazole carboxylase; phosphoribosylaminoimidazolesuccinocarboxamide synthase [Source:HGNC Symbol;Acc:HGNC:8587]	4	56435741	56464579	1
ENSG00000125779	PANK2	0.305887	0.113697	1.19933	0.251856	0.375283	-6.71023	80025	pantothenate kinase 2 [Source:HGNC Symbol;Acc:HGNC:15894]	20	3888839	3929882	1
ENSG00000120137	PANK3	0.119825	1.56549	0.650264	0.526875	0.656825	-7.32044	79646	pantothenate kinase 3 [Source:HGNC Symbol;Acc:HGNC:19365]	5	168548495	168579600	-1
ENSG00000090060	PAPOLA	0.257965	0.18308	1.19879	0.252059	0.375283	-6.72506	10914	poly(A) polymerase alpha [Source:HGNC Symbol;Acc:HGNC:14981]	14	96501433	96567111	1
ENSG00000137819	PAQR5	0.389833	4.7961	1.57647	0.138991	0.236549	-6.14378	54852	progestin and adipoQ receptor family member 5 [Source:HGNC Symbol;Acc:HGNC:29645]	15	69298947	69407780	1
ENSG00000100105	PATZ1	0.179679	-0.127685	0.826666	0.423376	0.559309	-7.02897	23598	POZ/BTB and AT hook containing zinc finger 1 [Source:HGNC Symbol;Acc:HGNC:13071]	22	31325804	31346232	-1
ENSG00000163939	PBRM1	-0.122992	-0.0782894	-0.652621	0.525401	0.656268	-7.1943	55193	polybromo 1 [Source:HGNC Symbol;Acc:HGNC:30064]	3	52545352	52685917	-1
ENSG00000228288	PCAT6	-0.896549	0.943785	-3.82342	0.00212022	0.00807966	-2.29656	100506696	prostate cancer associated transcript 6 (non-protein coding) [Source:HGNC Symbol;Acc:HGNC:43714]	1	202810954	202812156	1
ENSG00000169564	PCBP1	0.123086	0.193472	0.642533	0.531723	0.661184	-7.24755	5093	poly(rC) binding protein 1 [Source:HGNC Symbol;Acc:HGNC:8647]	2	70087454	70089203	1
ENSG00000179818	PCBP1-AS1	-0.0412999	0.540336	-0.197923	0.846174	0.908934	-7.49978	400960	PCBP1 antisense RNA 1 [Source:HGNC Symbol;Acc:HGNC:42948]	2	69962263	70103220	-1
ENSG00000197111	PCBP2	-0.24995	0.956667	-1.10645	0.288635	0.420559	-6.92018	5094	poly(rC) binding protein 2 [Source:HGNC Symbol;Acc:HGNC:8648]	12	53452102	53481162	1
ENSG00000165494	PCF11	0.439556	-0.142726	1.94624	0.0736218	0.142581	-5.5862	51585	PCF11 cleavage and polyadenylation factor subunit [Source:HGNC Symbol;Acc:HGNC:30097]	11	83156988	83187451	1
ENSG00000095464	PDE6C	-0.700576	1.51974	-2.67065	0.019274	0.049117	-4.49826	5146	phosphodiesterase 6C [Source:HGNC Symbol;Acc:HGNC:8787]	10	93612588	93666010	1
ENSG00000121440	PDZRN3	2.37602	-1.14429	5.78885	6.35e-05	0.000492989	1.84371	23024	PDZ domain containing ring finger 3 [Source:HGNC Symbol;Acc:HGNC:17704]	3	73382433	73624940	-1
ENSG00000242265	PEG10	-2.37676	0.282133	-8.86993	7.23e-07	1.2e-05	6.13109	23089	paternally expressed 10 [Source:HGNC Symbol;Acc:HGNC:14005]	7	94656325	94669695	1
ENSG00000123349	PFDN5	0.571925	-0.187249	2.62526	0.0210105	0.0528892	-4.38254	5204	prefoldin subunit 5 [Source:HGNC Symbol;Acc:HGNC:8869]	12	53295291	53299450	1
ENSG00000070087	PFN2	-0.27129	0.166913	-1.24052	0.236759	0.359346	-6.69635	5217	profilin 2 [Source:HGNC Symbol;Acc:HGNC:8882]	3	149964904	150050788	-1
ENSG00000137338	PGBD1	0.288815	0.928375	1.12619	0.280494	0.409419	-6.88879	84547	piggyBac transposable element derived 1 [Source:HGNC Symbol;Acc:HGNC:19398]	6	28281572	28302549	1
ENSG00000079739	PGM1	0.295633	-0.161465	0.885729	0.391892	0.532483	-6.96894	5236	phosphoglucomutase 1 [Source:HGNC Symbol;Acc:HGNC:8905]	1	63593276	63660245	1
ENSG00000087495	PHACTR3	2.0107	-0.801653	4.93744	0.000273389	0.00164107	0.275327	116154	phosphatase and actin regulator 3 [Source:HGNC Symbol;Acc:HGNC:15833]	20	59577509	59847711	1
ENSG00000215021	PHB2	0.648644	1.06979	1.84174	0.0884936	0.164687	-5.91345	11331	prohibitin 2 [Source:HGNC Symbol;Acc:HGNC:30306]	12	6965327	6970825	-1
ENSG00000134686	PHC2	-0.795194	2.16671	-4.72328	0.000400782	0.00217271	-0.581161	1912 100500853	polyhomeotic homolog 2 [Source:HGNC Symbol;Acc:HGNC:3183]	1	33323623	33431052	-1
ENSG00000040633	PHF23	0.451469	0.127327	2.48164	0.0275646	0.0658414	-4.72807	79142	PHD finger protein 23 [Source:HGNC Symbol;Acc:HGNC:28428]	17	7235028	7239722	-1
ENSG00000092621	PHGDH	0.395066	-0.25802	1.98452	0.0687709	0.134767	-5.49521	26227	phosphoglycerate dehydrogenase [Source:HGNC Symbol;Acc:HGNC:8923]	1	119659798	119744215	1
ENSG00000146247	PHIP	0.131314	0.377113	0.490538	0.631949	0.745961	-7.36858	55023	pleckstrin homology domain interacting protein [Source:HGNC Symbol;Acc:HGNC:15673]	6	78935867	79078236	-1
ENSG00000139289	PHLDA1	1.55892	0.805948	7.75328	3.19e-06	4.47e-05	4.51725	22822	pleckstrin homology like domain family A member 1 [Source:HGNC Symbol;Acc:HGNC:8933]	12	76025447	76033932	-1
ENSG00000019144	PHLDB1	1.4268	1.94439	6.74901	1.38e-05	0.000144401	2.92114	23187 102466719	pleckstrin homology like domain family B member 1 [Source:HGNC Symbol;Acc:HGNC:23697]	11	118606440	118658038	1
ENSG00000165282	PIGO	-0.752788	0.586235	-3.54126	0.00362918	0.012715	-2.82453	84720	phosphatidylinositol glycan anchor biosynthesis class O [Source:HGNC Symbol;Acc:HGNC:23215]	9	35088688	35096601	-1
ENSG00000011405	PIK3C2A	0.0896047	1.06545	0.515915	0.614597	0.730418	-7.40504	5286	phosphatidylinositol-4-phosphate 3-kinase catalytic subunit type 2 alpha [Source:HGNC Symbol;Acc:HGNC:8971]	11	17077730	17207983	-1
ENSG00000117461	PIK3R3	-0.198498	1.072	-1.21551	0.245837	0.369725	-6.799	8503	phosphoinositide-3-kinase regulatory subunit 3 [Source:HGNC Symbol;Acc:HGNC:8981]	1	46040140	46133036	-1
ENSG00000241878	PISD	0.0842049	-0.153688	0.361165	0.723791	0.814923	-7.3166	23761 102465666	phosphatidylserine decarboxylase [Source:HGNC Symbol;Acc:HGNC:8999]	22	31618491	31662432	-1
ENSG00000008710	PKD1	-0.144845	2.3182	-0.85655	0.407244	0.545266	-7.15594	5310 102465429	polycystin 1, transient receptor potential channel interacting [Source:HGNC Symbol;Acc:HGNC:9008]	16	2088710	2135898	-1
ENSG00000135549	PKIB	-1.03692	0.602514	-5.11904	0.000198591	0.00125808	0.154377	5570	protein kinase (cAMP-dependent, catalytic) inhibitor beta [Source:HGNC Symbol;Acc:HGNC:9018]	6	122471917	122726373	1
ENSG00000067225	PKM	-0.0780641	1.24646	-0.508711	0.619499	0.734561	-7.41162	5315	pyruvate kinase, muscle [Source:HGNC Symbol;Acc:HGNC:9021]	15	72199029	72231822	-1
ENSG00000153246	PLA2R1	1.25279	-0.177841	3.72078	0.00257651	0.00951621	-2.2451	22925	phospholipase A2 receptor 1 [Source:HGNC Symbol;Acc:HGNC:9042]	2	159932006	160062610	-1
ENSG00000189129	PLAC9	3.77379	-0.0971196	9.93911	1.97e-07	4.04e-06	7.62618	219348	placenta specific 9 [Source:HGNC Symbol;Acc:HGNC:19255]	10	80131682	80145359	1
ENSG00000124181	PLCG1	-0.091884	0.0298444	-0.437515	0.668936	0.773555	-7.34135	5335	phospholipase C gamma 1 [Source:HGNC Symbol;Acc:HGNC:9065]	20	41136960	41196801	1
ENSG00000104886	PLEKHJ1	-0.10745	2.49241	-0.592786	0.563519	0.689302	-7.34932	55111 102466736	pleckstrin homology domain containing J1 [Source:HGNC Symbol;Acc:HGNC:18211]	19	2230084	2237704	-1
ENSG00000145632	PLK2	0.679302	-0.25794	2.15945	0.0501338	0.105957	-5.18044	10769	polo like kinase 2 [Source:HGNC Symbol;Acc:HGNC:19699]	5	58453982	58460260	-1
ENSG00000106397	PLOD3	0.690641	-0.034997	2.20412	0.0461953	0.0995872	-5.14877	8985	procollagen-lysine,2-oxoglutarate 5-dioxygenase 3 [Source:HGNC Symbol;Acc:HGNC:9083]	7	101205977	101218420	-1
ENSG00000129951	PLPPR3	0.453885	4.53252	2.00832	0.0659048	0.130284	-5.50269	79948	phospholipid phosphatase related 3 [Source:HGNC Symbol;Acc:HGNC:23497]	19	812488	821977	-1
ENSG00000117598	PLPPR5	1.28746	5.2036	3.73235	0.00252044	0.00933203	-2.25419	163404	phospholipid phosphatase related 5 [Source:HGNC Symbol;Acc:HGNC:31703]	1	98890245	99005032	-1
ENSG00000102024	PLS3	1.9553	-0.413531	6.31359	2.72e-05	0.000248288	2.54621	5358	plastin 3 [Source:HGNC Symbol;Acc:HGNC:9091]	X	115561174	115650861	1
ENSG00000229018	PMS2P7	0.383111	-0.0594629	2.02625	0.0638185	0.126767	-5.48048		PMS1 homolog 2, mismatch repair system component pseudogene 7 [Source:HGNC Symbol;Acc:HGNC:33515]	7	73005541	73021103	1
ENSG00000100344	PNPLA3	0.130776	0.0186077	0.631643	0.538596	0.667271	-7.21975	80339	patatin like phospholipase domain containing 3 [Source:HGNC Symbol;Acc:HGNC:18590]	22	43923739	43964488	1
ENSG00000143157	POGK	0.593193	-0.150117	2.55447	0.024026	0.0589231	-4.51632	57645	pogo transposable element with KRAB domain [Source:HGNC Symbol;Acc:HGNC:18800]	1	166839447	166856344	1
ENSG00000143442	POGZ	0.520606	0.232732	1.66042	0.120802	0.213124	-6.11279	23126	pogo transposable element with ZNF domain [Source:HGNC Symbol;Acc:HGNC:18801]	1	151402724	151459465	-1
ENSG00000100227	POLDIP3	0.0962602	0.119827	0.568701	0.579275	0.703021	-7.28166	84271	DNA polymerase delta interacting protein 3 [Source:HGNC Symbol;Acc:HGNC:23782]	22	42583721	42614962	-1
ENSG00000177084	POLE	0.0973398	0.184037	0.368139	0.718709	0.810675	-7.39629	5426	DNA polymerase epsilon, catalytic subunit [Source:HGNC Symbol;Acc:HGNC:9177]	12	132623753	132687365	-1
ENSG00000181222	POLR2A	-0.193705	1.1612	-1.11681	0.284342	0.414791	-6.91127	5430	RNA polymerase II subunit A [Source:HGNC Symbol;Acc:HGNC:9187]	17	7484366	7514616	1
ENSG00000163882	POLR2H	1.06839	4.25395	4.68114	0.000432409	0.00228862	-0.538211	5437	RNA polymerase II subunit H [Source:HGNC Symbol;Acc:HGNC:9195]	3	184361718	184368596	1
ENSG00000196262	PPIA	-0.108656	0.394769	-0.455399	0.656353	0.764716	-7.39703	5478	peptidylprolyl isomerase A [Source:HGNC Symbol;Acc:HGNC:9253]	7	44796680	44824564	1
ENSG00000243970	PPIEL	0.885149	2.22361	3.70911	0.0026344	0.00968163	-2.50426		peptidylprolyl isomerase E like pseudogene [Source:HGNC Symbol;Acc:HGNC:33195]	1	39531838	39558707	-1
ENSG00000131013	PPIL4	0.569464	0.746834	3.43044	0.00448764	0.0151649	-3.02624	85313	peptidylprolyl isomerase like 4 [Source:HGNC Symbol;Acc:HGNC:15702]	6	149504733	149546038	-1
ENSG00000138032	PPM1B	0.669034	0.870412	3.10747	0.00834761	0.0250655	-3.64913	5495	protein phosphatase, Mg2+/Mn2+ dependent 1B [Source:HGNC Symbol;Acc:HGNC:9276]	2	44167969	44244384	1
ENSG00000186298	PPP1CC	0.290548	0.977894	1.20318	0.250412	0.374108	-6.80301	5501	protein phosphatase 1 catalytic subunit gamma [Source:HGNC Symbol;Acc:HGNC:9283]	12	110719680	110742939	-1
ENSG00000058272	PPP1R12A	0.469953	-0.0914976	1.94674	0.0735562	0.142581	-5.60112	4659	protein phosphatase 1 regulatory subunit 12A [Source:HGNC Symbol;Acc:HGNC:7618]	12	79773563	79935460	-1
ENSG00000158615	PPP1R15B	0.201879	0.000985925	0.800102	0.438064	0.573815	-7.07986	84919	protein phosphatase 1 regulatory subunit 15B [Source:HGNC Symbol;Acc:HGNC:14951]	1	204403387	204411791	-1
ENSG00000146112	PPP1R18	0.559453	0.0410004	2.54266	0.0245685	0.060016	-4.58814	170954	protein phosphatase 1 regulatory subunit 18 [Source:HGNC Symbol;Acc:HGNC:29413]	6	30676389	30687895	-1
ENSG00000117751	PPP1R8	-0.0735264	0.364451	-0.390037	0.70284	0.801167	-7.42087	5511	protein phosphatase 1 regulatory subunit 8 [Source:HGNC Symbol;Acc:HGNC:9296]	1	27830778	27851676	1
ENSG00000113575	PPP2CA	-0.0995868	3.51795	-0.456625	0.655495	0.764436	-7.3603	5515	protein phosphatase 2 catalytic subunit alpha [Source:HGNC Symbol;Acc:HGNC:9299]	5	134194334	134226142	-1
ENSG00000092020	PPP2R3C	0.518524	-0.298216	2.6076	0.0217262	0.0545246	-4.38729	55012	protein phosphatase 2 regulatory subunit B''gamma [Source:HGNC Symbol;Acc:HGNC:17485]	14	35085467	35122517	-1
ENSG00000107758	PPP3CB	0.029737	0.680484	0.162444	0.87346	0.924598	-7.51687	5532	protein phosphatase 3 catalytic subunit beta [Source:HGNC Symbol;Acc:HGNC:9315]	10	73436428	73496024	-1
ENSG00000275052	PPP4R3B	0.646503	-0.200506	2.80342	0.0149613	0.0400638	-4.04055	57223	protein phosphatase 4 regulatory subunit 3B [Source:HGNC Symbol;Acc:HGNC:29267]	2	55547292	55618880	-1
ENSG00000100239	PPP6R2	-0.841321	3.9513	-3.17848	0.00728207	0.0222963	-3.4309	9701	protein phosphatase 6 regulatory subunit 2 [Source:HGNC Symbol;Acc:HGNC:19253]	22	50343304	50445090	1
ENSG00000110075	PPP6R3	0.613201	-0.352857	2.66646	0.0194284	0.0494596	-4.25549	55291	protein phosphatase 6 regulatory subunit 3 [Source:HGNC Symbol;Acc:HGNC:1173]	11	68460731	68615334	1
ENSG00000258388	PPT2-EGFL8	1.88404	-0.598587	6.60971	1.71e-05	0.00017153	3.05333		PPT2-EGFL8 readthrough (NMD candidate) [Source:HGNC Symbol;Acc:HGNC:48343]	6	32153845	32171978	1
ENSG00000165672	PRDX3	0.503054	0.305717	2.34683	0.0354785	0.0806241	-5.00145	10935	peroxiredoxin 3 [Source:HGNC Symbol;Acc:HGNC:9354]	10	119167703	119178833	-1
ENSG00000124126	PREX1	0.879155	0.215615	3.23829	0.00649086	0.0204814	-3.29282	57580	phosphatidylinositol-3,4,5-trisphosphate dependent Rac exchange factor 1 [Source:HGNC Symbol;Acc:HGNC:32594]	20	48624252	48827883	-1
ENSG00000124593	PRICKLE4	-0.625671	0.279536	-2.98594	0.010544	0.03044	-3.85683	29964	prickle planar cell polarity protein 4 [Source:HGNC Symbol;Acc:HGNC:16805]	6	41780349	41790141	1
ENSG00000108946	PRKAR1A	-0.340838	0.0952011	-1.9109	0.0783753	0.149476	-5.73752	5573	protein kinase cAMP-dependent type I regulatory subunit alpha [Source:HGNC Symbol;Acc:HGNC:9388]	17	68511780	68551319	1
ENSG00000115825	PRKD3	0.984452	0.116624	4.29231	0.000880433	0.00403048	-1.23574	23683	protein kinase D3 [Source:HGNC Symbol;Acc:HGNC:9408]	2	37250502	37324808	-1
ENSG00000253729	PRKDC	-0.409163	0.751208	-1.9773	0.069663	0.136085	-5.70726	5591	protein kinase, DNA-activated, catalytic polypeptide [Source:HGNC Symbol;Acc:HGNC:9413]	8	47773108	47960183	-1
ENSG00000183530	PRR14L	0.3235	0.119468	1.0679	0.305041	0.440319	-6.85343	253143	proline rich 14 like [Source:HGNC Symbol;Acc:HGNC:28738]	22	31676256	31750140	-1
ENSG00000204469	PRRC2A	0.328712	1.07454	2.04781	0.0613904	0.12373	-5.59098	7916	proline rich coiled-coil 2A [Source:HGNC Symbol;Acc:HGNC:13918]	6	31620720	31637771	1
ENSG00000130723	PRRC2B	0.275391	0.977853	1.48143	0.162378	0.268141	-6.45196	84726	proline rich coiled-coil 2B [Source:HGNC Symbol;Acc:HGNC:28121]	9	131394093	131500197	1
ENSG00000117523	PRRC2C	-0.512842	0.731075	-2.39359	0.0325145	0.0754811	-4.99427	23215	proline rich coiled-coil 2C [Source:HGNC Symbol;Acc:HGNC:24903]	1	171485551	171593511	1
ENSG00000166450	PRTG	-0.577425	0.692492	-2.92587	0.0118328	0.0330438	-4.01154	283659	protogenin [Source:HGNC Symbol;Acc:HGNC:26373]	15	55611546	55743090	-1
ENSG00000100911	PSME2	-0.0576809	0.726967	-0.311398	0.760447	0.843551	-7.48412	5721 102465801	proteasome activator subunit 2 [Source:HGNC Symbol;Acc:HGNC:9569]	14	24143362	24147570	-1
ENSG00000188647	PTAR1	1.17856	-0.309541	4.22236	0.00100239	0.00437905	-1.24951	375743	protein prenyltransferase alpha subunit repeat containing 1 [Source:HGNC Symbol;Acc:HGNC:30449]	9	69709522	69759959	-1
ENSG00000011304	PTBP1	-0.314453	2.41852	-1.45196	0.170275	0.277847	-6.48946	5725 100616459	polypyrimidine tract binding protein 1 [Source:HGNC Symbol;Acc:HGNC:9583]	19	797075	812327	1
ENSG00000117425	PTCH2	1.37522	0.976036	6.61941	1.69e-05	0.000169671	2.75038	8643	patched 2 [Source:HGNC Symbol;Acc:HGNC:9586]	1	44819844	44843063	-1
ENSG00000171862	PTEN	0.224095	3.69103	1.09071	0.295251	0.427932	-6.84575	5728	phosphatase and tensin homolog [Source:HGNC Symbol;Acc:HGNC:9588]	10	87863113	87971930	1
ENSG00000187514	PTMA	0.0665224	0.457908	0.359523	0.724991	0.815903	-7.44021	5757 728026 100302285	prothymosin, alpha [Source:HGNC Symbol;Acc:HGNC:9623]	2	231706895	231713541	1
ENSG00000159335	PTMS	-0.934629	0.515771	-4.66071	0.000448667	0.00234461	-0.682663	5763	parathymosin [Source:HGNC Symbol;Acc:HGNC:9629]	12	6765516	6770952	1
ENSG00000152104	PTPN14	0.240649	-0.0115836	1.03784	0.31831	0.45549	-6.86024	5784	protein tyrosine phosphatase, non-receptor type 14 [Source:HGNC Symbol;Acc:HGNC:9647]	1	214348696	214552449	-1
ENSG00000149177	PTPRJ	3.61807	-0.904893	6.9593	1.01e-05	0.000110737	3.72023	5795	protein tyrosine phosphatase, receptor type J [Source:HGNC Symbol;Acc:HGNC:9673]	11	47980558	48170841	1
ENSG00000164611	PTTG1	-0.820398	0.813975	-4.49171	0.000610056	0.00295716	-1.01965	9232	pituitary tumor-transforming 1 [Source:HGNC Symbol;Acc:HGNC:9690]	5	160421822	160428744	1
ENSG00000134644	PUM1	0.292719	2.55258	1.58843	0.136262	0.232933	-6.29036	9698	pumilio RNA binding family member 1 [Source:HGNC Symbol;Acc:HGNC:14957]	1	30931506	31065991	-1
ENSG00000146676	PURB	0.422698	-0.180602	1.84388	0.0881634	0.164443	-5.74084	5814 100616393	purine rich element binding protein B [Source:HGNC Symbol;Acc:HGNC:9702]	7	44876293	44885361	-1
ENSG00000279192	PWAR5	0.236971	6.11705	0.97498	0.347407	0.486724	-6.74647	8123	Prader Willi/Angelman region RNA 5 [Source:HGNC Symbol;Acc:HGNC:30090]	15	24985053	24988232	1
ENSG00000119943	PYROXD2	-1.85452	4.04003	-7.22861	6.76e-06	8.2e-05	3.75865	84795 100302133	pyridine nucleotide-disulphide oxidoreductase domain 2 [Source:HGNC Symbol;Acc:HGNC:23517]	10	98383565	98415184	-1
ENSG00000172053	QARS	0.0865067	0.2397	0.380659	0.709619	0.805927	-7.40069	5859 102465536	glutaminyl-tRNA synthetase [Source:HGNC Symbol;Acc:HGNC:9751]	3	49095932	49105135	-1
ENSG00000112531	QKI	0.598787	0.536184	2.49401	0.02693	0.0645123	-4.76581	9444	QKI, KH domain containing RNA binding [Source:HGNC Symbol;Acc:HGNC:21100]	6	163414000	163578596	1
ENSG00000137955	RABGGTB	2.17368	8.59189	5.47924	0.000106751	0.000749072	1.24655	5876	Rab geranylgeranyltransferase beta subunit [Source:HGNC Symbol;Acc:HGNC:9796]	1	75786197	75795079	1
ENSG00000204628	RACK1	0.161112	6.12161	0.624932	0.542856	0.670985	-7.03159	10399	receptor for activated C kinase 1 [Source:HGNC Symbol;Acc:HGNC:4399]	5	181236909	181248096	-1
ENSG00000179262	RAD23A	0.357814	1.51705	1.6123	0.130956	0.22652	-6.27111	5886	RAD23 homolog A, nucleotide excision repair protein [Source:HGNC Symbol;Acc:HGNC:9812]	19	12945855	12953642	1
ENSG00000172613	RAD9A	0.059105	-0.0127516	0.251793	0.805147	0.876252	-7.39454	5883	RAD9 checkpoint clamp component A [Source:HGNC Symbol;Acc:HGNC:9827]	11	67317871	67398410	1
ENSG00000132341	RAN	0.327507	0.152971	1.70161	0.112665	0.202225	-6.04238	5901	RAN, member RAS oncogene family [Source:HGNC Symbol;Acc:HGNC:9846]	12	130871879	130877678	1
ENSG00000099901	RANBP1	0.166918	1.19562	0.973893	0.347927	0.487176	-7.05442	5902	RAN binding protein 1 [Source:HGNC Symbol;Acc:HGNC:9847]	22	20115938	20127357	1
ENSG00000108352	RAPGEFL1	0.636823	-0.332582	2.49937	0.0266595	0.0639879	-4.55724	51195	Rap guanine nucleotide exchange factor like 1 [Source:HGNC Symbol;Acc:HGNC:17428]	17	40177010	40195656	1
ENSG00000185989	RASA3	0.103947	0.815787	0.393928	0.700035	0.798767	-7.45491	22821	RAS p21 protein activator 3 [Source:HGNC Symbol;Acc:HGNC:20331]	13	113977783	114132611	-1
ENSG00000068831	RASGRP2	1.92395	0.51181	4.9281	0.000277954	0.00166303	-0.0348006	10235	RAS guanyl releasing protein 2 [Source:HGNC Symbol;Acc:HGNC:9879]	11	64726911	64745456	-1
ENSG00000152689	RASGRP3	4.72337	0.924857	15.1183	1.29e-09	8.02e-08	12.5488	25780	RAS guanyl releasing protein 3 [Source:HGNC Symbol;Acc:HGNC:14545]	2	33436324	33564750	1
ENSG00000101773	RBBP8	-0.731993	2.77759	-2.77688	0.0157399	0.0415204	-4.27965	5932 100616139	RB binding protein 8, endonuclease [Source:HGNC Symbol;Acc:HGNC:9891]	18	22798261	23026488	1
ENSG00000100320	RBFOX2	-0.293127	0.220808	-1.18125	0.258713	0.383962	-6.77462	23543	RNA binding protein, fox-1 homolog 2 [Source:HGNC Symbol;Acc:HGNC:9906]	22	35738736	36028425	-1
ENSG00000239306	RBM14	0.194045	-0.0804324	0.794649	0.441119	0.576597	-7.07239	10432	RNA binding motif protein 14 [Source:HGNC Symbol;Acc:HGNC:14219]	11	66616582	66627347	1
ENSG00000139746	RBM26	0.409259	0.172754	1.80303	0.0946585	0.174846	-5.88459	64062	RNA binding motif protein 26 [Source:HGNC Symbol;Acc:HGNC:20327]	13	79311824	79406477	-1
ENSG00000184863	RBM33	0.302093	1.65799	1.55756	0.143399	0.242563	-6.34971	155435	RNA binding motif protein 33 [Source:HGNC Symbol;Acc:HGNC:27223]	7	155644451	155781485	1
ENSG00000131051	RBM39	-0.111814	0.75105	-0.565367	0.581474	0.705327	-7.36883	9584	RNA binding motif protein 39 [Source:HGNC Symbol;Acc:HGNC:15923]	20	35703609	35742312	-1
ENSG00000004534	RBM6	0.0715536	0.80429	0.423982	0.678527	0.781	-7.44189	10180	RNA binding motif protein 6 [Source:HGNC Symbol;Acc:HGNC:9903]	3	49940007	50100045	1
ENSG00000265241	RBM8A	-0.154398	0.00906822	-0.841796	0.415157	0.5508	-7.06967	9939	RNA binding motif protein 8A [Source:HGNC Symbol;Acc:HGNC:9905]	1	145917714	145927678	-1
ENSG00000153250	RBMS1	1.19622	0.131163	5.53321	9.74e-05	0.000695423	1.03877	5937 100616364	RNA binding motif single stranded interacting protein 1 [Source:HGNC Symbol;Acc:HGNC:9907]	2	160272151	160493794	-1
ENSG00000147274	RBMX	1.28586	8.07508	2.04194	0.0620436	0.12448	-5.11362	27316	RNA binding motif protein, X-linked [Source:HGNC Symbol;Acc:HGNC:9910]	X	136848004	136880764	-1
ENSG00000131381	RBSN	0.696642	-0.116541	2.14122	0.0518295	0.108385	-5.24037	64145	rabenosyn, RAB effector [Source:HGNC Symbol;Acc:HGNC:20759]	3	15070073	15099163	-1
ENSG00000135870	RC3H1	0.820548	-0.376696	2.87606	0.0130188	0.0358441	-3.8493	149041	ring finger and CCCH-type domains 1 [Source:HGNC Symbol;Acc:HGNC:29434]	1	173931214	174022297	-1
ENSG00000049449	RCN1	-0.0845598	0.897291	-0.375357	0.713463	0.808123	-7.46957	5954 440034	reticulocalbin 1 [Source:HGNC Symbol;Acc:HGNC:9934]	11	31812391	32105755	1
ENSG00000142599	RERE	-0.0937727	0.614004	-0.55369	0.589211	0.711939	-7.36613	473	arginine-glutamic acid dipeptide repeats [Source:HGNC Symbol;Acc:HGNC:9965]	1	8352397	8817643	-1
ENSG00000084093	REST	0.435648	0.0995382	2.03594	0.0627163	0.125382	-5.49919	5978	RE1 silencing transcription factor [Source:HGNC Symbol;Acc:HGNC:9966]	4	56907876	56935844	1
ENSG00000079313	REXO1	0.100665	1.04303	0.504623	0.622289	0.737164	-7.41068	57455 100302210	RNA exonuclease 1 homolog [Source:HGNC Symbol;Acc:HGNC:24616]	19	1815246	1848463	-1
ENSG00000163918	RFC4	0.555145	-0.0686301	2.57079	0.0232956	0.0573928	-4.51714	5984	replication factor C subunit 4 [Source:HGNC Symbol;Acc:HGNC:9972]	3	186789880	186807058	-1
ENSG00000132005	RFX1	0.0794456	0.00356088	0.374833	0.713843	0.808123	-7.3542	5989	regulatory factor X1 [Source:HGNC Symbol;Acc:HGNC:9982]	19	13961538	14007039	-1
ENSG00000143878	RHOB	0.50653	2.99523	2.87638	0.0130107	0.0358441	-4.07007	388	ras homolog family member B [Source:HGNC Symbol;Acc:HGNC:668]	2	20447074	20449445	1
ENSG00000155366	RHOC	0.831873	-0.00923981	3.31707	0.00557878	0.0181109	-3.0938	389	ras homolog family member C [Source:HGNC Symbol;Acc:HGNC:669]	1	112701106	112707434	-1
ENSG00000139725	RHOF	0.283481	0.0394804	1.1388	0.275387	0.402439	-6.7635	54509	ras homolog family member F, filopodia associated [Source:HGNC Symbol;Acc:HGNC:15703]	12	121777754	121803403	-1
ENSG00000140522	RLBP1	0.870981	2.05328	4.20264	0.00103983	0.0045029	-1.56392	6017	retinaldehyde binding protein 1 [Source:HGNC Symbol;Acc:HGNC:10024]	15	89209869	89221751	-1
ENSG00000269900	RMRP	-0.615134	6.70429	-1.69513	0.113912	0.204021	-5.79156	6023	RNA component of mitochondrial RNA processing endoribonuclease [Source:EntrezGene;Acc:6023]	9	35657751	35658018	-1
ENSG00000277027	RMRP	-0.615134	6.70429	-1.69513	0.113912	0.204021	-5.79156		RNA component of mitochondrial RNA processing endoribonuclease [Source:HGNC Symbol;Acc:HGNC:10031]	9	35657754	35658017	-1
ENSG00000283293	RN7SK	0.0921113	1.25501	0.440233	0.667017	0.772417	-7.44372	125050	RNA, 7SK small nuclear [Source:HGNC Symbol;Acc:HGNC:10037]	6	52995621	52995948	1
ENSG00000283029	RN7SL1	0.23867	2.90893	1.31707	0.210613	0.327694	-6.63837	6029	RNA, 7SL, cytoplasmic 1 [Source:EntrezGene;Acc:6029]	14	49586579	49586878	1
ENSG00000276168	RN7SL1	0.23867	2.90893	1.31707	0.210613	0.327694	-6.63837	6029	RNA, 7SL, cytoplasmic 1 [Source:HGNC Symbol;Acc:HGNC:10038]	14	49586580	49586878	1
ENSG00000240869	RN7SL128P	-0.0232225	1.29867	-0.137966	0.892386	0.935439	-7.53786		RNA, 7SL, cytoplasmic 128, pseudogene [Source:HGNC Symbol;Acc:HGNC:46144]	6	20421583	20421887	-1
ENSG00000274012	RN7SL2	0.175977	3.00663	0.996336	0.337315	0.476628	-6.99416	378706	RNA, 7SL, cytoplasmic 2 [Source:HGNC Symbol;Acc:HGNC:23134]	14	49862550	49862849	-1
ENSG00000244389	RN7SL242P	-0.223701	0.184852	-1.34071	0.203028	0.318539	-6.57511		RNA, 7SL, cytoplasmic 242, pseudogene [Source:HGNC Symbol;Acc:HGNC:46258]	1	70180144	70180440	-1
ENSG00000275090	RN7SL296P	0.151423	1.00826	0.922561	0.373082	0.513014	-7.10161		RNA, 7SL, cytoplasmic 296, pseudogene [Source:HGNC Symbol;Acc:HGNC:46312]	3	33103008	33103306	1
ENSG00000265813	RN7SL300P	-0.258441	0.262578	-1.57623	0.139045	0.236549	-6.27204		RNA, 7SL, cytoplasmic 300, pseudogene [Source:HGNC Symbol;Acc:HGNC:46316]	3	153199700	153200017	-1
ENSG00000244642	RN7SL396P	0.524733	-0.0360307	2.51079	0.0260915	0.0628455	-4.6336		RNA, 7SL, cytoplasmic 396, pseudogene [Source:HGNC Symbol;Acc:HGNC:46412]	8	119862662	119862956	1
ENSG00000244139	RN7SL397P	0.265868	1.55562	1.39702	0.185854	0.296051	-6.56752		RNA, 7SL, cytoplasmic 397, pseudogene [Source:HGNC Symbol;Acc:HGNC:46413]	3	120121909	120122206	1
ENSG00000275878	RN7SL43P	-0.26033	0.436091	-1.58626	0.136753	0.233451	-6.2806		RNA, 7SL, cytoplasmic 43, pseudogene [Source:HGNC Symbol;Acc:HGNC:46059]	7	66980120	66980410	1
ENSG00000265802	RN7SL49P	-0.259549	0.911685	-1.56237	0.142265	0.241033	-6.34633		RNA, 7SL, cytoplasmic 49, pseudogene [Source:HGNC Symbol;Acc:HGNC:46065]	13	45002150	45002447	1
ENSG00000263740	RN7SL4P	-0.0244972	1.8556	-0.153787	0.880145	0.928589	-7.52955		RNA, 7SL, cytoplasmic 4, pseudogene [Source:HGNC Symbol;Acc:HGNC:10039]	3	15738515	15738809	1
ENSG00000240733	RN7SL502P	0.277474	1.5498	1.45196	0.170275	0.277847	-6.49482		RNA, 7SL, cytoplasmic 502, pseudogene [Source:HGNC Symbol;Acc:HGNC:46518]	6	36450912	36451201	-1
ENSG00000239224	RN7SL546P	-0.0104238	0.613537	-0.0655985	0.948698	0.968243	-7.52463		RNA, 7SL, cytoplasmic 546, pseudogene [Source:HGNC Symbol;Acc:HGNC:46562]	14	102582888	102583177	-1
ENSG00000265735	RN7SL5P	0.0236648	2.07687	0.146385	0.885868	0.931365	-7.53049		RNA, 7SL, cytoplasmic 5, pseudogene [Source:HGNC Symbol;Acc:HGNC:10040]	9	9442060	9442380	1
ENSG00000239899	RN7SL674P	0.00614996	1.48935	0.03575	0.972026	0.980737	-7.54471		RNA, 7SL, cytoplasmic 674, pseudogene [Source:HGNC Symbol;Acc:HGNC:46690]	2	11584773	11585047	1
ENSG00000241529	RN7SL767P	0.0265694	1.16198	0.150795	0.882458	0.929752	-7.53604		RNA, 7SL, cytoplasmic 767, pseudogene [Source:HGNC Symbol;Acc:HGNC:46783]	3	113632704	113632998	1
ENSG00000239748	RN7SL795P	0.0131971	1.46595	0.0738206	0.94228	0.965272	-7.54283		RNA, 7SL, cytoplasmic 795, pseudogene [Source:HGNC Symbol;Acc:HGNC:46811]	18	70512727	70513008	1
ENSG00000242216	RN7SL97P	-0.188032	0.0107419	-1.08123	0.29929	0.432774	-6.84137		RNA, 7SL, cytoplasmic 97, pseudogene [Source:HGNC Symbol;Acc:HGNC:46113]	18	25818234	25818532	-1
ENSG00000278233	RNA5-8S5	0.16606	9.48681	0.470483	0.645825	0.75553	-6.80435	100008587	RNA, 5.8S ribosomal 5 [Source:HGNC Symbol;Acc:HGNC:37660]	21	8212572	8212724	1
ENSG00000277739	RNA5-8S5	0.16606	9.48681	0.470483	0.645825	0.75553	-6.80435	100008587	RNA, 5.8S ribosomal 5 [Source:HGNC Symbol;Acc:HGNC:37660]	21	8256781	8256933	1
ENSG00000275215	RNA5-8S5	0.16606	9.48681	0.470483	0.645825	0.75553	-6.80435	100008587	RNA, 5.8S ribosomal 5 [Source:HGNC Symbol;Acc:HGNC:37660]	21	8395607	8395759	1
ENSG00000278189	RNA5-8S5	0.16606	9.48681	0.470483	0.645825	0.75553	-6.80435	100008587	RNA, 5.8S ribosomal 5 [Source:HGNC Symbol;Acc:HGNC:37660]	21	8439823	8439975	1
ENSG00000276700	RNA5-8S5	0.16606	9.48681	0.470483	0.645825	0.75553	-6.80435	100008587	RNA, 5.8S ribosomal 5 [Source:HGNC Symbol;Acc:HGNC:37660]	KI270733.1	128877	129029	1
ENSG00000275757	RNA5-8S5	0.16606	9.48681	0.470483	0.645825	0.75553	-6.80435	100008587	RNA, 5.8S ribosomal 5 [Source:HGNC Symbol;Acc:HGNC:37660]	KI270733.1	173956	174108	1
ENSG00000274917	RNA5-8S5	0.16606	9.48681	0.470483	0.645825	0.75553	-6.80435	100008587	RNA, 5.8S ribosomal 5 [Source:HGNC Symbol;Acc:HGNC:37660]	GL000220.1	112025	112177	1
ENSG00000273730	RNA5-8S5	0.16606	9.48681	0.470483	0.645825	0.75553	-6.80435	100008587	RNA, 5.8S ribosomal 5 [Source:HGNC Symbol;Acc:HGNC:37660]	GL000220.1	155997	156149	1
ENSG00000200434	RNA5-8SP2	-0.233763	2.0475	-1.26224	0.229092	0.349874	-6.73342		RNA, 5.8S ribosomal pseudogene 2 [Source:HGNC Symbol;Acc:HGNC:41956]	16	34162959	34163110	1
ENSG00000201966	RNA5-8SP4	0.0782965	3.19137	0.333274	0.744254	0.832288	-7.43686		RNA, 5.8S ribosomal pseudogene 4 [Source:HGNC Symbol;Acc:HGNC:41958]	19	24004358	24004507	-1
ENSG00000251705	RNA5-8SP6	0.394263	4.8126	2.0999	0.0558736	0.115429	-5.32674		RNA, 5.8S ribosomal pseudogene 6 [Source:HGNC Symbol;Acc:HGNC:41960]	Y	10200155	10200306	1
ENSG00000199352	RNA5S1	1.24339	7.37492	4.26133	0.000932442	0.00412822	-1.05874	100169751	RNA, 5S ribosomal 1 [Source:HGNC Symbol;Acc:HGNC:34362]	1	228610268	228610386	-1
ENSG00000199910	RNA5S10	1.24426	7.37384	4.26345	0.00092879	0.00412822	-1.05484	100169761	RNA, 5S ribosomal 10 [Source:HGNC Symbol;Acc:HGNC:34371]	1	228630390	228630508	-1
ENSG00000199334	RNA5S11	1.24426	7.37406	4.26282	0.000929861	0.00412822	-1.05599	100169762	RNA, 5S ribosomal 11 [Source:HGNC Symbol;Acc:HGNC:34372]	1	228632631	228632749	-1
ENSG00000199270	RNA5S12	1.24312	7.37509	4.25975	0.00093518	0.00412822	-1.0617	100169763	RNA, 5S ribosomal 12 [Source:HGNC Symbol;Acc:HGNC:34373]	1	228634871	228634989	-1
ENSG00000202526	RNA5S13	1.24279	7.37521	4.25919	0.00093615	0.00412822	-1.06275	100169764	RNA, 5S ribosomal 13 [Source:HGNC Symbol;Acc:HGNC:34374]	1	228637096	228637214	-1
ENSG00000201355	RNA5S14	1.24462	7.37345	4.26278	0.000929928	0.00412822	-1.05612	100169765	RNA, 5S ribosomal 14 [Source:HGNC Symbol;Acc:HGNC:34375]	1	228639337	228639455	-1
ENSG00000201925	RNA5S15	1.24408	7.37378	4.26093	0.000933134	0.00412822	-1.05958	100169766	RNA, 5S ribosomal 15 [Source:HGNC Symbol;Acc:HGNC:34376]	1	228641568	228641686	-1
ENSG00000202257	RNA5S16	1.24405	7.37387	4.26076	0.000933422	0.00412822	-1.05989	100169767	RNA, 5S ribosomal 16 [Source:HGNC Symbol;Acc:HGNC:34377]	1	228643809	228643927	-1
ENSG00000200370	RNA5S17	1.24414	7.37392	4.26098	0.000933043	0.00412822	-1.05947	100169768	RNA, 5S ribosomal 17 [Source:HGNC Symbol;Acc:HGNC:34378]	1	228646040	228646158	-1
ENSG00000201588	RNA5S2	1.24244	7.37574	4.25795	0.000938306	0.00412822	-1.06504	100169753	RNA, 5S ribosomal 2 [Source:HGNC Symbol;Acc:HGNC:34363]	1	228612509	228612627	-1
ENSG00000199337	RNA5S3	1.24243	7.37552	4.25825	0.000937782	0.00412822	-1.06449	100169754	RNA, 5S ribosomal 3 [Source:HGNC Symbol;Acc:HGNC:34364]	1	228614750	228614868	-1
ENSG00000200381	RNA5S4	1.24429	7.37349	4.26115	0.000932754	0.00412822	-1.05919	100169755	RNA, 5S ribosomal 4 [Source:HGNC Symbol;Acc:HGNC:34365]	1	228616991	228617109	-1
ENSG00000199396	RNA5S5	1.24437	7.37364	4.26114	0.000932764	0.00412822	-1.05919	100169756	RNA, 5S ribosomal 5 [Source:HGNC Symbol;Acc:HGNC:34366]	1	228619232	228619350	-1
ENSG00000200624	RNA5S6	1.24409	7.37389	4.26094	0.000933111	0.00412822	-1.05955	100169757	RNA, 5S ribosomal 6 [Source:HGNC Symbol;Acc:HGNC:34367]	1	228621447	228621565	-1
ENSG00000202521	RNA5S7	1.24271	7.37547	4.25808	0.000938075	0.00412822	-1.06481	100169758	RNA, 5S ribosomal 7 [Source:HGNC Symbol;Acc:HGNC:34368]	1	228623667	228623785	-1
ENSG00000200343	RNA5S8	1.24271	7.37558	4.25822	0.000937827	0.00412822	-1.06453	100169759	RNA, 5S ribosomal 8 [Source:HGNC Symbol;Acc:HGNC:34369]	1	228625909	228626027	-1
ENSG00000201321	RNA5S9	1.11977	7.20109	3.91325	0.00178889	0.00703347	-1.73391	100169760	RNA, 5S ribosomal 9 [Source:HGNC Symbol;Acc:HGNC:34370]	1	228628148	228628266	-1
ENSG00000238379	RNA5SP103	0.665651	-0.553415	2.99615	0.0103393	0.0298837	-3.57241		RNA, 5S ribosomal pseudogene 103 [Source:HGNC Symbol;Acc:HGNC:42901]	2	128445081	128445198	-1
ENSG00000201595	RNA5SP132	0.348298	5.73712	1.32594	0.207741	0.324652	-6.39153		RNA, 5S ribosomal pseudogene 132 [Source:HGNC Symbol;Acc:HGNC:43032]	3	51694465	51694582	-1
ENSG00000201413	RNA5SP141	0.0136617	2.25724	0.0606277	0.95258	0.970605	-7.53762		RNA, 5S ribosomal pseudogene 141 [Source:HGNC Symbol;Acc:HGNC:43041]	3	134783436	134783555	-1
ENSG00000199994	RNA5SP145	0.0381364	2.12466	0.163258	0.872832	0.924598	-7.52734		RNA, 5S ribosomal pseudogene 145 [Source:HGNC Symbol;Acc:HGNC:43045]	3	151188099	151188223	1
ENSG00000201822	RNA5SP149	-0.0122025	2.2408	-0.0549631	0.957006	0.974713	-7.53824		RNA, 5S ribosomal pseudogene 149 [Source:HGNC Symbol;Acc:HGNC:43049]	3	180161886	180161977	-1
ENSG00000199839	RNA5SP150	2.31568	4.73025	7.05515	8.72e-06	9.95e-05	3.55538		RNA, 5S ribosomal pseudogene 150 [Source:HGNC Symbol;Acc:HGNC:43050]	3	181822872	181822990	-1
ENSG00000200741	RNA5SP161	-0.749864	0.388323	-3.31978	0.00554987	0.0180484	-3.23162		RNA, 5S ribosomal pseudogene 161 [Source:HGNC Symbol;Acc:HGNC:43061]	4	56097390	56097504	1
ENSG00000251823	RNA5SP162	1.26865	7.33444	4.32197	0.000833437	0.00387322	-0.947972		RNA, 5S ribosomal pseudogene 162 [Source:HGNC Symbol;Acc:HGNC:43062]	1	228558296	228558339	-1
ENSG00000200275	RNA5SP199	-0.491791	1.08393	-2.66445	0.0195026	0.0495467	-4.51244		RNA, 5S ribosomal pseudogene 199 [Source:HGNC Symbol;Acc:HGNC:43099]	5	155845437	155845528	1
ENSG00000201185	RNA5SP202	1.99598	7.98794	5.86636	5.59e-05	0.000442327	1.86652		RNA, 5S ribosomal pseudogene 202 [Source:HGNC Symbol;Acc:HGNC:43102]	6	4427963	4428081	1
ENSG00000201415	RNA5SP204	1.27339	2.82502	4.73122	0.000395096	0.00215562	-0.528387		RNA, 5S ribosomal pseudogene 204 [Source:HGNC Symbol;Acc:HGNC:43104]	6	17721786	17721903	-1
ENSG00000200248	RNA5SP214	0.75961	1.91194	2.8638	0.0133282	0.0364796	-4.1341		RNA, 5S ribosomal pseudogene 214 [Source:HGNC Symbol;Acc:HGNC:43114]	6	117060682	117060799	1
ENSG00000251920	RNA5SP216	0.239395	1.71741	0.953314	0.357864	0.496599	-7.07211		RNA, 5S ribosomal pseudogene 216 [Source:HGNC Symbol;Acc:HGNC:43116]	6	125979812	125979934	-1
ENSG00000200058	RNA5SP218	0.613915	0.782706	3.10798	0.00833935	0.0250655	-3.64576		RNA, 5S ribosomal pseudogene 218 [Source:HGNC Symbol;Acc:HGNC:43118]	6	134257035	134257143	1
ENSG00000199523	RNA5SP226	-0.639689	1.19491	-3.27026	0.00610392	0.0195768	-3.3673		RNA, 5S ribosomal pseudogene 226 [Source:HGNC Symbol;Acc:HGNC:43126]	6	165409562	165409676	1
ENSG00000201041	RNA5SP242	1.28101	3.03802	4.70853	0.000411572	0.00220554	-0.560765		RNA, 5S ribosomal pseudogene 242 [Source:HGNC Symbol;Acc:HGNC:43142]	7	128697439	128697556	1
ENSG00000252866	RNA5SP243	-0.521197	0.464194	-2.62652	0.0209601	0.0528697	-4.55173		RNA, 5S ribosomal pseudogene 243 [Source:HGNC Symbol;Acc:HGNC:43143]	7	128697710	128697744	1
ENSG00000239021	RNA5SP246	0.711031	0.828669	2.79263	0.0152731	0.0406791	-4.2401		RNA, 5S ribosomal pseudogene 246 [Source:HGNC Symbol;Acc:HGNC:43146]	7	130602795	130602913	-1
ENSG00000202472	RNA5SP248	0.532729	6.44791	1.83653	0.0893015	0.165693	-5.59901		RNA, 5S ribosomal pseudogene 248 [Source:HGNC Symbol;Acc:HGNC:43148]	7	140386781	140386907	-1
ENSG00000199354	RNA5SP273	0.821936	1.29446	3.52125	0.0037709	0.0130272	-2.86743		RNA, 5S ribosomal pseudogene 273 [Source:HGNC Symbol;Acc:HGNC:43173]	8	90511128	90511240	1
ENSG00000202474	RNA5SP283	1.08459	-0.29241	3.40381	0.00472285	0.0157662	-2.82849		RNA, 5S ribosomal pseudogene 283 [Source:HGNC Symbol;Acc:HGNC:43183]	9	62802320	62802438	-1
ENSG00000251884	RNA5SP288	0.47174	1.55937	1.71999	0.109192	0.196991	-6.11244		RNA, 5S ribosomal pseudogene 288 [Source:HGNC Symbol;Acc:HGNC:43188]	9	95142449	95142541	-1
ENSG00000201861	RNA5SP298	-0.541818	0.98267	-3.15327	0.00764374	0.0233172	-3.58935		RNA, 5S ribosomal pseudogene 298 [Source:HGNC Symbol;Acc:HGNC:43198]	10	282015	282125	-1
ENSG00000252001	RNA5SP303	0.482878	0.667763	2.08287	0.0576245	0.117963	-5.50547		RNA, 5S ribosomal pseudogene 303 [Source:HGNC Symbol;Acc:HGNC:43203]	10	19633683	19633812	-1
ENSG00000223131	RNA5SP304	0.376881	0.296599	1.45288	0.170022	0.2778	-6.42022		RNA, 5S ribosomal pseudogene 304 [Source:HGNC Symbol;Acc:HGNC:43204]	10	22997255	22997358	1
ENSG00000201059	RNA5SP336	1.32865	6.20075	3.183	0.00721909	0.0222133	-3.21886		RNA, 5S ribosomal pseudogene 336 [Source:HGNC Symbol;Acc:HGNC:43236]	11	21000881	21000997	-1
ENSG00000272435	RNA5SP357	0.266651	6.00971	0.994805	0.338032	0.477097	-6.7375		RNA, 5S ribosomal pseudogene 357 [Source:HGNC Symbol;Acc:HGNC:43257]	12	34205699	34205817	1
ENSG00000199843	RNA5SP358	1.14871	7.14268	3.97741	0.00158509	0.00643287	-1.61658		RNA, 5S ribosomal pseudogene 358 [Source:HGNC Symbol;Acc:HGNC:43258]	12	38161466	38161582	-1
ENSG00000199415	RNA5SP370	0.0653072	2.10086	0.27633	0.786649	0.861679	-7.50111		RNA, 5S ribosomal pseudogene 370 [Source:HGNC Symbol;Acc:HGNC:43270]	12	104125236	104125356	1
ENSG00000199480	RNA5SP389	0.0440629	2.14117	0.190563	0.851819	0.911034	-7.522		RNA, 5S ribosomal pseudogene 389 [Source:HGNC Symbol;Acc:HGNC:43289]	14	106636672	106636786	1
ENSG00000199771	RNA5SP426	0.726566	5.89331	2.59368	0.0223072	0.0556444	-4.35635		RNA, 5S ribosomal pseudogene 426 [Source:HGNC Symbol;Acc:HGNC:43326]	16	50869455	50869575	-1
ENSG00000200558	RNA5SP429	-0.645427	1.14981	-3.33697	0.00536958	0.0175468	-3.23894		RNA, 5S ribosomal pseudogene 429 [Source:HGNC Symbol;Acc:HGNC:43329]	16	68742480	68742588	1
ENSG00000201920	RNA5SP442	0.263252	1.06247	0.91603	0.376371	0.515773	-7.10616		RNA, 5S ribosomal pseudogene 442 [Source:HGNC Symbol;Acc:HGNC:43342]	17	41718154	41718260	1
ENSG00000252598	RNA5SP460	1.21266	0.201734	3.91608	0.00177937	0.0070319	-1.95996		RNA, 5S ribosomal pseudogene 460 [Source:HGNC Symbol;Acc:HGNC:43360]	18	72751952	72752051	1
ENSG00000199900	RNA5SP463	0.769913	5.20076	2.57964	0.0229087	0.0565751	-4.44553		RNA, 5S ribosomal pseudogene 463 [Source:HGNC Symbol;Acc:HGNC:43363]	19	7886977	7887096	-1
ENSG00000201035	RNA5SP469	0.457972	6.31686	1.60699	0.132121	0.227424	-5.95611		RNA, 5S ribosomal pseudogene 469 [Source:HGNC Symbol;Acc:HGNC:43369]	19	21113128	21113236	-1
ENSG00000252623	RNA5SP481	-0.715371	0.514314	-3.30634	0.00569498	0.0184398	-3.27107		RNA, 5S ribosomal pseudogene 481 [Source:HGNC Symbol;Acc:HGNC:43381]	20	32008351	32008472	1
ENSG00000201356	RNA5SP500	0.654646	6.53699	2.31403	0.0377096	0.0843021	-4.79623		RNA, 5S ribosomal pseudogene 500 [Source:HGNC Symbol;Acc:HGNC:43400]	X	28982852	28982970	-1
ENSG00000199564	RNA5SP502	-0.427871	0.175373	-2.34402	0.0356647	0.0807048	-5.02223		RNA, 5S ribosomal pseudogene 502 [Source:HGNC Symbol;Acc:HGNC:43402]	X	41292798	41292916	1
ENSG00000272351	RNA5SP506	0.475381	6.36595	1.67191	0.118482	0.210078	-5.85689		RNA, 5S ribosomal pseudogene 506 [Source:HGNC Symbol;Acc:HGNC:43406]	X	69672479	69672597	1
ENSG00000200036	RNA5SP65	0.839601	0.940573	2.93999	0.0115164	0.032306	-3.96544		RNA, 5S ribosomal pseudogene 65 [Source:HGNC Symbol;Acc:HGNC:42842]	1	167005959	167006077	1
ENSG00000200755	RNA5SP68	1.29282	-0.42174	5.73235	6.98e-05	0.000530053	1.5222		RNA, 5S ribosomal pseudogene 68 [Source:HGNC Symbol;Acc:HGNC:42845]	1	173969318	173969436	-1
ENSG00000200408	RNA5SP74	0.325114	1.50495	1.70186	0.112616	0.202225	-6.13973		RNA, 5S ribosomal pseudogene 74 [Source:HGNC Symbol;Acc:HGNC:42851]	1	204562413	204562521	-1
ENSG00000202264	RNA5SP77	0.469781	0.537472	2.08742	0.0571521	0.117287	-5.48432		RNA, 5S ribosomal pseudogene 77 [Source:HGNC Symbol;Acc:HGNC:42854]	1	227561181	227561300	1
ENSG00000206882	RNA5SP87	1.25285	1.16932	4.57092	0.000528006	0.00264654	-0.845423		RNA, 5S ribosomal pseudogene 87 [Source:HGNC Symbol;Acc:HGNC:42885]	2	22338886	22339003	-1
ENSG00000258818	RNASE4	0.0123368	3.43766	0.0465757	0.963561	0.97622	-7.47639	6038	ribonuclease A family member 4 [Source:HGNC Symbol;Acc:HGNC:10047]	14	20684100	20701215	1
ENSG00000171865	RNASEH1	0.46865	-0.0817473	2.04279	0.0619481	0.12448	-5.44282	246243	ribonuclease H1 [Source:HGNC Symbol;Acc:HGNC:18466]	2	3544793	3558616	-1
ENSG00000141622	RNF165	1.20814	0.456611	4.83966	0.00032532	0.00187398	-0.271375	494470	ring finger protein 165 [Source:HGNC Symbol;Acc:HGNC:31696]	18	46326809	46463140	1
ENSG00000092098	RNF31	0.128512	0.46724	0.684007	0.506011	0.639531	-7.26094	55072	ring finger protein 31 [Source:HGNC Symbol;Acc:HGNC:16031]	14	24146683	24160661	1
ENSG00000114125	RNF7	0.6772	-0.356828	1.43264	0.175624	0.284328	-6.25314	9616	ring finger protein 7 [Source:HGNC Symbol;Acc:HGNC:10070]	3	141738204	141747560	1
ENSG00000270103	RNU11	0.320551	3.74706	1.842	0.0884536	0.164687	-5.8347			1	28648600	28648730	1
ENSG00000274978	RNU11	0.320551	3.74706	1.842	0.0884536	0.164687	-5.8347	26824	RNA, U11 small nuclear [Source:HGNC Symbol;Acc:HGNC:10108]	1	28648600	28648733	1
ENSG00000206652	RNU1-1	-0.339723	3.37245	-1.72238	0.108748	0.196652	-6.04989	26871	RNA, U1 small nuclear 1 [Source:HGNC Symbol;Acc:HGNC:10120]	1	16514122	16514285	-1
ENSG00000206702	RNU1-11P	-1.23274	1.66745	-6.50279	2.02e-05	0.000197632	2.51473		RNA, U1 small nuclear 11, pseudogene [Source:HGNC Symbol;Acc:HGNC:10137]	6	13214056	13214219	1
ENSG00000202408	RNU1-122P	-0.478334	0.646056	-2.35787	0.0347562	0.0794932	-5.05255		RNA, U1 small nuclear 122, pseudogene [Source:HGNC Symbol;Acc:HGNC:48464]	1	148334612	148334767	-1
ENSG00000206908	RNU1-136P	-1.01655	1.225	-5.9705	4.71e-05	0.000386573	1.62741		RNA, U1 small nuclear 136, pseudogene [Source:HGNC Symbol;Acc:HGNC:48478]	6	53219261	53219424	1
ENSG00000207201	RNU1-148P	-0.977233	1.67336	-4.99781	0.000245706	0.00151021	-0.0837462		RNA, U1 small nuclear 148, pseudogene [Source:HGNC Symbol;Acc:HGNC:48490]	8	24076997	24077158	-1
ENSG00000202347	RNU1-16P	-3.14164	0.150657	-13.5705	4.86e-09	2.23e-07	11.2836		RNA, U1 small nuclear 16, pseudogene [Source:HGNC Symbol;Acc:HGNC:39890]	13	113478915	113479078	-1
ENSG00000276027	RNU12	-1.01535	6.22256	-4.64407	0.00046238	0.00240612	-0.447061	267010	RNA, U12 small nuclear [Source:HGNC Symbol;Acc:HGNC:19380]	22	42615244	42615393	1
ENSG00000270022	RNU12	-0.888588	6.38386	-3.94392	0.00168833	0.00676696	-1.75193			22	42615244	42615907	1
ENSG00000207005	RNU1-2	-0.324623	3.3836	-1.64585	0.123801	0.217487	-6.16242	26870	RNA, U1 small nuclear 2 [Source:HGNC Symbol;Acc:HGNC:10123]	1	16895980	16896143	1
ENSG00000200204	RNU1-22P	-2.31445	-0.14074	-10.8801	6.87e-08	1.84e-06	8.60934		RNA, U1 small nuclear 22, pseudogene [Source:HGNC Symbol;Acc:HGNC:41963]	16	3086143	3086300	1
ENSG00000206596	RNU1-27P	-0.28713	3.34875	-1.44872	0.171163	0.278928	-6.4414		RNA, U1 small nuclear 27, pseudogene [Source:HGNC Symbol;Acc:HGNC:37497]	14	34546714	34546877	1
ENSG00000206588	RNU1-28P	-0.303898	3.33316	-1.54624	0.146096	0.246076	-6.30909		RNA, U1 small nuclear 28, pseudogene [Source:HGNC Symbol;Acc:HGNC:37498]	14	34556226	34556389	-1
ENSG00000207513	RNU1-3	-0.341265	3.37041	-1.73355	0.106691	0.193748	-6.03321	26869	RNA, U1 small nuclear 3 [Source:HGNC Symbol;Acc:HGNC:10130]	1	16666785	16666948	-1
ENSG00000207389	RNU1-4	-0.330057	3.38298	-1.66412	0.12005	0.212403	-6.13569	6060	RNA, U1 small nuclear 4 [Source:HGNC Symbol;Acc:HGNC:10128]	1	16740516	16740679	1
ENSG00000207154	RNU1-46P	-2.95334	-0.474809	-11.0033	6.01e-08	1.74e-06	8.79122		RNA, U1 small nuclear 46, pseudogene [Source:HGNC Symbol;Acc:HGNC:48388]	18	51283733	51283896	-1
ENSG00000207175	RNU1-67P	-0.779101	1.92747	-4.61056	0.000491319	0.00251966	-0.792828		RNA, U1 small nuclear 67, pseudogene [Source:HGNC Symbol;Acc:HGNC:48409]	X	119423742	119423905	1
ENSG00000212153	RNU1-82P	-0.402558	1.05126	-2.29069	0.0393778	0.0875574	-5.18554		RNA, U1 small nuclear 82, pseudogene [Source:HGNC Symbol;Acc:HGNC:48424]	7	141727984	141728148	1
ENSG00000207322	RNU1-89P	-1.8552	0.411869	-10.4359	1.12e-07	2.64e-06	8.00442		RNA, U1 small nuclear 89, pseudogene [Source:HGNC Symbol;Acc:HGNC:48431]	4	135995929	135996092	-1
ENSG00000274585	RNU2-1	0.153818	3.28812	0.860418	0.405186	0.543098	-7.10198	6066	RNA, U2 small nuclear 1 [Source:HGNC Symbol;Acc:HGNC:10142]	17	43233787	43233977	-1
ENSG00000222644	RNU2-16P	1.2443	-0.00816538	4.5883	0.000511581	0.00259669	-0.633469		RNA, U2 small nuclear 16, pseudogene [Source:HGNC Symbol;Acc:HGNC:48509]	4	75829454	75829589	-1
ENSG00000223198	RNU2-22P	1.87724	-0.483667	6.09051	3.88e-05	0.000333679	2.18852		RNA, U2 small nuclear 22, pseudogene [Source:HGNC Symbol;Acc:HGNC:48515]	2	231501990	231502201	-1
ENSG00000222477	RNU2-23P	1.79019	0.832719	5.58006	9e-05	0.000651947	1.05181		RNA, U2 small nuclear 23, pseudogene [Source:HGNC Symbol;Acc:HGNC:48516]	11	65147584	65147778	1
ENSG00000222440	RNU2-26P	-1.27695	0.350143	-6.12042	3.7e-05	0.000323437	1.93708		RNA, U2 small nuclear 26, pseudogene [Source:HGNC Symbol;Acc:HGNC:48519]	X	91798093	91798283	1
ENSG00000222389	RNU2-28P	1.37713	0.235874	5.41947	0.000118187	0.000816867	0.835798		RNA, U2 small nuclear 28, pseudogene [Source:HGNC Symbol;Acc:HGNC:48521]	3	81509476	81509664	1
ENSG00000222355	RNU2-29P	-1.60124	1.22007	-6.96047	1e-05	0.000110737	3.24808		RNA, U2 small nuclear 29, pseudogene [Source:HGNC Symbol;Acc:HGNC:48522]	7	53776136	53776324	1
ENSG00000222328	RNU2-2P	-1.98548	6.25432	-8.53231	1.12e-06	1.75e-05	5.77091		RNA, U2 small nuclear 2, pseudogene [Source:HGNC Symbol;Acc:HGNC:10152]	11	62841619	62841809	-1
ENSG00000252018	RNU2-30P	1.51992	0.857351	6.83708	1.21e-05	0.00013004	3.11803		RNA, U2 small nuclear 30, pseudogene [Source:HGNC Symbol;Acc:HGNC:48523]	1	52754322	52754462	1
ENSG00000222276	RNU2-33P	-1.28417	1.84474	-7.21313	6.91e-06	8.31e-05	3.63677		RNA, U2 small nuclear 33, pseudogene [Source:HGNC Symbol;Acc:HGNC:48526]	14	96384624	96384815	1
ENSG00000222293	RNU2-36P	-2.70253	5.71244	-11.1672	5.05e-08	1.51e-06	8.91925		RNA, U2 small nuclear 36, pseudogene [Source:HGNC Symbol;Acc:HGNC:48529]	9	86422938	86423128	-1
ENSG00000222627	RNU2-37P	-1.42943	1.7168	-8.38002	1.36e-06	2.1e-05	5.33216		RNA, U2 small nuclear 37, pseudogene [Source:HGNC Symbol;Acc:HGNC:48530]	3	128075073	128075249	-1
ENSG00000222788	RNU2-38P	1.28966	0.298272	4.95678	0.000264184	0.00161178	-0.0162476		RNA, U2 small nuclear 38, pseudogene [Source:HGNC Symbol;Acc:HGNC:48531]	1	148939739	148939817	-1
ENSG00000222076	RNU2-3P	-0.0397545	1.5148	-0.167019	0.869931	0.92261	-7.53031		RNA, U2 small nuclear 3, pseudogene [Source:HGNC Symbol;Acc:HGNC:10153]	15	95745804	95745994	1
ENSG00000222923	RNU2-41P	1.83856	0.0135184	4.93696	0.000273622	0.00164107	0.0712535		RNA, U2 small nuclear 41, pseudogene [Source:HGNC Symbol;Acc:HGNC:48534]	2	114420125	114420302	1
ENSG00000252847	RNU2-46P	1.28092	0.341387	4.95173	0.000266556	0.00161433	-0.0348757		RNA, U2 small nuclear 46, pseudogene [Source:HGNC Symbol;Acc:HGNC:48539]	9	95859904	95860016	1
ENSG00000222626	RNU2-48P	-0.521471	2.38987	-2.91683	0.0120398	0.0335085	-4.02853		RNA, U2 small nuclear 48, pseudogene [Source:HGNC Symbol;Acc:HGNC:48541]	5	157976766	157976956	-1
ENSG00000277084	RNU2-4P	1.45445	1.23822	5.622	8.39e-05	0.000614746	1.05835		RNA, U2 small nuclear 4, pseudogene [Source:HGNC Symbol;Acc:HGNC:10154]	17	43387226	43387417	-1
ENSG00000222640	RNU2-51P	1.29682	0.303868	4.37073	0.000761727	0.0035988	-1.11379		RNA, U2 small nuclear 51, pseudogene [Source:HGNC Symbol;Acc:HGNC:48544]	14	70360892	70361088	1
ENSG00000252468	RNU2-57P	-1.27562	0.343693	-6.33842	2.61e-05	0.000241408	2.29986		RNA, U2 small nuclear 57, pseudogene [Source:HGNC Symbol;Acc:HGNC:48550]	Y	5019076	5019266	1
ENSG00000252212	RNU2-58P	1.817	-0.51374	6.09734	3.84e-05	0.000331175	2.20049		RNA, U2 small nuclear 58, pseudogene [Source:HGNC Symbol;Acc:HGNC:48551]	17	59129276	59129458	-1
ENSG00000222414	RNU2-59P	0.612894	3.60646	3.3827	0.00491816	0.0163301	-3.06407		RNA, U2 small nuclear 59, pseudogene [Source:HGNC Symbol;Acc:HGNC:48552]	10	101364845	101365035	-1
ENSG00000222465	RNU2-5P	1.14784	0.515861	4.34137	0.000804101	0.00376514	-1.21335		RNA, U2 small nuclear 5, pseudogene [Source:HGNC Symbol;Acc:HGNC:10155]	9	70188571	70188750	-1
ENSG00000223001	RNU2-61P	-1.19253	1.93939	-6.75135	1.38e-05	0.000144401	2.91879		RNA, U2 small nuclear 61, pseudogene [Source:HGNC Symbol;Acc:HGNC:48554]	6	89063500	89063690	-1
ENSG00000223336	RNU2-6P	-0.16394	2.29499	-0.865826	0.40232	0.541014	-7.14811		RNA, U2 small nuclear 6, pseudogene [Source:HGNC Symbol;Acc:HGNC:42506]	13	46374401	46374590	-1
ENSG00000222726	RNU2-7P	-1.51337	1.36884	-7.49181	4.62e-06	6.09e-05	4.05684		RNA, U2 small nuclear 7, pseudogene [Source:HGNC Symbol;Acc:HGNC:42505]	13	20612161	20612338	1
ENSG00000200795	RNU4-1	1.31741	3.46624	5.69984	7.36e-05	0.000554441	1.2404	26835	RNA, U4 small nuclear 1 [Source:HGNC Symbol;Acc:HGNC:10192]	12	120293097	120293237	-1
ENSG00000202538	RNU4-2	1.09273	2.82458	5.06524	0.000218215	0.00136151	0.0812695	26834	RNA, U4 small nuclear 2 [Source:HGNC Symbol;Acc:HGNC:10193]	12	120291763	120291903	-1
ENSG00000201164	RNU4-36P	0.862298	-0.151101	3.02862	0.00971385	0.0284411	-3.60556		RNA, U4 small nuclear 36, pseudogene [Source:HGNC Symbol;Acc:HGNC:46972]	16	68535515	68535658	1
ENSG00000222750	RNU4-46P	0.678969	0.0702702	2.68233	0.0188504	0.0482361	-4.32954		RNA, U4 small nuclear 46, pseudogene [Source:HGNC Symbol;Acc:HGNC:46982]	16	19498610	19498747	1
ENSG00000199313	RNU4-82P	1.55595	1.68633	5.14157	0.000190927	0.00122203	0.188369		RNA, U4 small nuclear 82, pseudogene [Source:HGNC Symbol;Acc:HGNC:47018]	9	124887410	124887549	-1
ENSG00000264229	RNU4ATAC	0.0501895	1.28753	0.259864	0.799049	0.872758	-7.51112	100151683	RNA, U4atac small nuclear (U12-dependent splicing) [Source:HGNC Symbol;Acc:HGNC:34016]	2	121530881	121531007	1
ENSG00000199568	RNU5A-1	0.686169	5.35701	3.22072	0.00671391	0.0210245	-3.22895	26831	RNA, U5A small nuclear 1 [Source:HGNC Symbol;Acc:HGNC:10211]	15	65296051	65296166	1
ENSG00000200156	RNU5B-1	0.564469	6.1333	2.2573	0.0418861	0.0917347	-4.93423	26832	RNA, U5B small nuclear 1 [Source:HGNC Symbol;Acc:HGNC:10212]	15	65304677	65304792	1
ENSG00000200169	RNU5D-1	1.47718	2.2715	6.76102	1.36e-05	0.000142992	2.95156		RNA, U5D small nuclear 1 [Source:HGNC Symbol;Acc:HGNC:10214]	1	44731055	44731170	-1
ENSG00000199347	RNU5E-1	1.56363	4.5993	6.07848	3.96e-05	0.000337876	1.96661	26829	RNA, U5E small nuclear 1 [Source:HGNC Symbol;Acc:HGNC:10215]	1	11908152	11908271	1
ENSG00000201801	RNU5E-4P	1.03784	1.1045	4.10228	0.00125396	0.00524674	-1.73562		RNA, U5E small nuclear 4, pseudogene [Source:HGNC Symbol;Acc:HGNC:42513]	1	11909808	11909927	-1
ENSG00000202444	RNU5E-6P	1.47994	0.813986	6.64556	1.62e-05	0.000164314	2.81766		RNA, U5E small nuclear 6, pseudogene [Source:HGNC Symbol;Acc:HGNC:42522]	1	44819883	44819997	-1
ENSG00000199377	RNU5F-1	1.48132	0.85925	5.81704	6.06e-05	0.000475224	1.43504	26828	RNA, U5F small nuclear 1 [Source:HGNC Symbol;Acc:HGNC:10216]	1	44721786	44721902	-1
ENSG00000207041	RNU6-3P	0.76789	-0.285805	2.94285	0.0114535	0.0322755	-3.74594		RNA, U6 small nuclear 3, pseudogene [Source:HGNC Symbol;Acc:HGNC:34275]	X	141118030	141118136	-1
ENSG00000207507	RNU6-9	0.873604	-0.142126	3.56143	0.00349184	0.0123209	-2.59133	101954271	RNA, U6 small nuclear 9 [Source:HGNC Symbol;Acc:HGNC:34269]	19	893484	893590	1
ENSG00000238923	RNU7-1	-0.458969	2.66503	-2.16975	0.0491986	0.104363	-5.37641	100147744	RNA, U7 small nuclear 1 [Source:HGNC Symbol;Acc:HGNC:34033]	12	6943816	6943878	1
ENSG00000238959	RNU7-19P	-1.10612	4.62563	-4.54278	0.000555757	0.00274772	-0.771326		RNA, U7 small nuclear 19 pseudogene [Source:HGNC Symbol;Acc:HGNC:34115]	3	73027808	73027873	1
ENSG00000207340	RNVU1-1	-0.75422	2.32437	-4.87139	0.000307427	0.00180426	-0.308198	101954273	RNA, variant U1 small nuclear 1 [Source:HGNC Symbol;Acc:HGNC:10133]	1	148362370	148362533	-1
ENSG00000207501	RNVU1-14	-1.36709	2.6061	-5.93403	5e-05	0.000404922	1.58813	101954266	RNA, variant U1 small nuclear 14 [Source:HGNC Symbol;Acc:HGNC:48319]	1	145281116	145281279	1
ENSG00000207205	RNVU1-15	0.0386702	0.446016	0.206394	0.839688	0.905094	-7.48635	101954267	RNA, variant U1 small nuclear 15 [Source:HGNC Symbol;Acc:HGNC:48320]	1	144412576	144412740	1
ENSG00000207349	RNVU1-17	0.619508	1.83557	2.44426	0.0295707	0.0697587	-4.90823	101954269	RNA, variant U1 small nuclear 17 [Source:HGNC Symbol;Acc:HGNC:48322]	1	143699456	143699619	-1
ENSG00000206737	RNVU1-18	-0.327293	3.32563	-1.66316	0.120245	0.212596	-6.14179	26863	RNA, variant U1 small nuclear 18 [Source:HGNC Symbol;Acc:HGNC:37496]	1	143729407	143729570	-1
ENSG00000275538	RNVU1-19	-0.785476	1.71133	-4.65923	0.000449874	0.00234598	-0.706744	101954277	RNA, variant U1 small nuclear 19 [Source:HGNC Symbol;Acc:HGNC:48324]	1	120850819	120850985	-1
ENSG00000206585	RNVU1-7	-0.776127	2.91359	-4.49403	0.000607479	0.00295044	-0.992361	26864	RNA, variant U1 small nuclear 7 [Source:HGNC Symbol;Acc:HGNC:37500]	1	148038753	148038916	-1
ENSG00000201098	RNY1	0.527829	10.2144	1.15882	0.267424	0.393589	-6.17855	6084	RNA, Ro-associated Y1 [Source:HGNC Symbol;Acc:HGNC:10242]	7	148987136	148987248	-1
ENSG00000201121	RNY1P12	-0.0571677	3.02713	-0.313379	0.758976	0.843551	-7.45639		RNA, Ro-associated Y1 pseudogene 12 [Source:HGNC Symbol;Acc:HGNC:50875]	3	101662060	101662164	-1
ENSG00000201900	RNY1P13	-0.035564	1.90902	-0.178971	0.860727	0.917281	-7.52505		RNA, Ro-associated Y1 pseudogene 13 [Source:HGNC Symbol;Acc:HGNC:50876]	1	114727720	114727824	1
ENSG00000206617	RNY1P5	-0.19051	0.328208	-0.839023	0.416655	0.552492	-7.13256		RNA, Ro-associated Y1 pseudogene 5 [Source:HGNC Symbol;Acc:HGNC:42482]	13	74289100	74289214	-1
ENSG00000207474	RNY1P7	-0.483759	0.932898	-2.36154	0.0345192	0.0791805	-5.05856		RNA, Ro-associated Y1 pseudogene 7 [Source:HGNC Symbol;Acc:HGNC:42484]	13	24703556	24703665	-1
ENSG00000202354	RNY3	-0.133511	4.671	-0.597837	0.560244	0.688356	-7.18707	6085	RNA, Ro-associated Y3 [Source:HGNC Symbol;Acc:HGNC:10243]	7	148983755	148983856	1
ENSG00000201955	RNY3P1	-0.102563	0.748097	-0.548554	0.59263	0.713981	-7.3783		RNA, Ro-associated Y3 pseudogene 1 [Source:HGNC Symbol;Acc:HGNC:42477]	5	79170234	79170335	-1
ENSG00000199788	RNY3P2	0.144155	1.34082	0.822459	0.425681	0.561454	-7.19153		RNA, Ro-associated Y3 pseudogene 2 [Source:HGNC Symbol;Acc:HGNC:42486]	13	49095391	49095492	1
ENSG00000223298	RNY3P8	0.091112	1.20178	0.515799	0.614675	0.730418	-7.40585		RNA, Ro-associated Y3 pseudogene 8 [Source:HGNC Symbol;Acc:HGNC:42492]	13	95310830	95310955	-1
ENSG00000252316	RNY4	0.286235	10.8391	0.655809	0.523412	0.655125	-6.58323	6086	RNA, Ro-associated Y4 [Source:HGNC Symbol;Acc:HGNC:10244]	7	148963315	148963410	1
ENSG00000202441	RNY4P10	0.292849	10.7087	0.658721	0.521599	0.654471	-6.59173		RNA, Ro-associated Y4 pseudogene 10 [Source:HGNC Symbol;Acc:HGNC:34060]	6	33199601	33199696	1
ENSG00000207011	RNY4P13	-0.270389	0.566388	-0.807684	0.433838	0.569484	-7.1863		RNA, Ro-associated Y4 pseudogene 13 [Source:HGNC Symbol;Acc:HGNC:34063]	17	30059052	30059147	-1
ENSG00000267482	RNY4P13	-0.270389	0.566388	-0.807684	0.433838	0.569484	-7.1863			17	30059054	30059147	-1
ENSG00000200526	RNY4P14	0.546926	1.42913	2.57001	0.0233299	0.0573928	-4.67628		RNA, Ro-associated Y4 pseudogene 14 [Source:HGNC Symbol;Acc:HGNC:34064]	13	39785415	39785510	-1
ENSG00000201638	RNY4P16	0.023512	3.3486	0.136277	0.893695	0.936018	-7.47464		RNA, Ro-associated Y4 pseudogene 16 [Source:HGNC Symbol;Acc:HGNC:34066]	1	234837976	234838069	1
ENSG00000201818	RNY4P17	-0.181294	3.42765	-0.588124	0.566551	0.691873	-7.29563		RNA, Ro-associated Y4 pseudogene 17 [Source:HGNC Symbol;Acc:HGNC:34067]	4	169005249	169005344	1
ENSG00000212409	RNY4P18	-0.68194	4.22956	-3.2017	0.00696399	0.0215892	-3.36474		RNA, Ro-associated Y4 pseudogene 18 [Source:HGNC Symbol;Acc:HGNC:34068]	9	111097325	111097413	-1
ENSG00000252487	RNY4P20	0.226582	6.92379	0.720847	0.483797	0.617379	-6.88531		RNA, Ro-associated Y4 pseudogene 20 [Source:HGNC Symbol;Acc:HGNC:34070]	6	151298841	151298933	-1
ENSG00000201377	RNY4P23	-0.0533163	2.13478	-0.304384	0.765665	0.847196	-7.49157		RNA, Ro-associated Y4 pseudogene 23 [Source:HGNC Symbol;Acc:HGNC:42473]	X	70396279	70396375	1
ENSG00000238711	RNY4P25	-0.405243	4.78485	-1.9795	0.0693902	0.135766	-5.53111		RNA, Ro-associated Y4 pseudogene 25 [Source:HGNC Symbol;Acc:HGNC:42475]	1	151439000	151439095	1
ENSG00000200211	RNY4P27	-0.643502	5.22331	-2.61922	0.0212527	0.0534447	-4.37729		RNA, Ro-associated Y4 pseudogene 27 [Source:HGNC Symbol;Acc:HGNC:42495]	13	95336106	95336201	-1
ENSG00000222733	RNY4P29	0.334382	2.88541	2.06551	0.0594616	0.120529	-5.53252		RNA, Ro-associated Y4 pseudogene 29 [Source:HGNC Symbol;Acc:HGNC:42497]	13	58527655	58527751	-1
ENSG00000202124	RNY4P3	-0.171125	0.947043	-0.953583	0.357732	0.496599	-7.07565		RNA, Ro-associated Y4 pseudogene 3 [Source:HGNC Symbol;Acc:HGNC:10247]	16	50098264	50098358	1
ENSG00000222148	RNY4P30	0.287998	2.73259	1.72154	0.108903	0.196733	-6.08757		RNA, Ro-associated Y4 pseudogene 30 [Source:HGNC Symbol;Acc:HGNC:42498]	13	49889634	49889728	-1
ENSG00000252034	RNY4P37	-0.0986234	0.437875	-0.524014	0.609109	0.726414	-7.36575		RNA, Ro-associated Y4 pseudogene 37 [Source:HGNC Symbol;Acc:HGNC:50885]	18	46077004	46077099	-1
ENSG00000200537	RNY4P6	0.0484818	3.77702	0.28032	0.783654	0.861038	-7.40791		RNA, Ro-associated Y4 pseudogene 6 [Source:HGNC Symbol;Acc:HGNC:34055]	11	117015897	117015992	1
ENSG00000201470	RNY4P7	0.00970043	10.1675	0.0229012	0.982078	0.988864	-6.86346		RNA, Ro-associated Y4 pseudogene 7 [Source:HGNC Symbol;Acc:HGNC:34056]	2	127798903	127798998	-1
ENSG00000200064	RNY4P9	-0.097851	3.67932	-0.551221	0.590854	0.712297	-7.29693		RNA, Ro-associated Y4 pseudogene 9 [Source:HGNC Symbol;Acc:HGNC:34058]	13	49908634	49908730	-1
ENSG00000134318	ROCK2	0.681873	0.191848	2.66452	0.0195002	0.0495467	-4.39252	9475	Rho associated coiled-coil containing protein kinase 2 [Source:HGNC Symbol;Acc:HGNC:10252]	2	11179761	11348330	-1
ENSG00000215158	RP11-1023L17.1	0.562903	-0.277289	2.45087	0.0292059	0.0692277	-4.67581			5	34164698	34244796	-1
ENSG00000260342	RP11-1035H13.3	0.265043	-0.0915128	1.1787	0.259692	0.384493	-6.68172			16	18788063	18801519	-1
ENSG00000260729	RP11-106M3.2	-0.284256	1.14105	-1.23705	0.238004	0.361013	-6.77468			15	72284727	72375981	-1
ENSG00000228549	RP11-108M9.3	0.661153	4.5062	2.30427	0.038399	0.0856885	-5.00068			1	16870945	16874092	1
ENSG00000271324	RP11-10C24.2	0.81704	1.6803	3.34533	0.00528397	0.0172918	-3.21606			3	33793644	33794145	-1
ENSG00000266179	RP11-1113L8.6	-2.94228	0.114798	-10.2817	1.33e-07	3.03e-06	7.93853			17	19600860	19601345	1
ENSG00000283360	RP11-122G18.10	1.75599	2.20306	9.51602	3.25e-07	6.3e-06	6.85067			1	161403409	161470523	-1
ENSG00000283317	RP11-122G18.11	1.77084	2.19429	9.38584	3.81e-07	7.15e-06	6.68646			1	161433444	161440996	-1
ENSG00000283696	RP11-122G18.12	0.507986	5.46483	1.92044	0.0770652	0.147274	-5.56118			1	161399409	161422424	1
ENSG00000234961	RP11-124N14.3	0.196487	0.392756	1.03624	0.319029	0.456126	-6.94214			10	17233325	17234833	-1
ENSG00000228165	RP11-125K10.5	1.94219	9.9454	4.62282	0.000480525	0.00247971	-0.193968			9	4850299	4850373	-1
ENSG00000266290	RP11-159D12.10	1.28637	0.451918	6.49218	2.05e-05	0.000200133	2.60709	101927666		17	58076891	58083204	-1
ENSG00000262202	RP11-160E2.6	-0.537427	4.99259	-2.49403	0.0269291	0.0645123	-4.62569			17	19112000	19112636	-1
ENSG00000264772	RP11-186B7.4	0.487434	0.90753	2.64762	0.0201367	0.0511051	-4.5237			17	7572826	7582024	1
ENSG00000261441	RP11-217B1.2	0.578917	6.97416	1.97006	0.0705674	0.137526	-5.33612			15	89335053	89336161	1
ENSG00000258358	RP11-228G3.1	1.24763	0.610897	3.73959	0.00248598	0.00924589	-2.3661			12	84448625	84449878	-1
ENSG00000257285	RP11-298I3.1	1.03491	1.43456	5.59233	8.82e-05	0.000642374	0.986564	101926933		14	22929609	22955562	1
ENSG00000280211	RP11-2C24.3	0.384784	1.69553	2.35247	0.0351079	0.0799286	-5.07069			16	30773532	30776033	-1
ENSG00000270823	RP11-2E11.6	-2.21503	10.8118	-5.39496	0.000123241	0.000841263	1.22688			7	130495794	130498427	-1
ENSG00000274292	RP11-347I19.7	0.255349	-0.0710066	1.15383	0.269393	0.396015	-6.72227			12	121800797	121803403	1
ENSG00000276668	RP11-35J10.7	1.04498	1.97404	5.68984	7.49e-05	0.000560366	1.15352			11	7699562	7699988	-1
ENSG00000258017	RP11-386G11.10	0.0141872	1.03415	0.0904209	0.929334	0.957157	-7.54317			12	49127782	49147869	1
ENSG00000274421	RP11-386J22.3	-0.452399	5.55559	-1.94326	0.074012	0.142879	-5.51964			9	70310875	70312120	1
ENSG00000254615	RP11-395G23.3	-0.481984	1.56446	-2.17554	0.0486801	0.103541	-5.38066			8	106270144	106272899	1
ENSG00000261519	RP11-403P17.4	0.495262	5.99859	1.93684	0.0748596	0.143965	-5.48394			16	66549280	66551189	1
ENSG00000279123	RP11-424M24.3	0.426455	7.84892	1.35935	0.197206	0.310559	-6.14585			16	70778433	70779145	1
ENSG00000273062	RP11-428K3.1	0.0845516	0.47924	0.444859	0.663756	0.770334	-7.40605			1	178724306	178726285	-1
ENSG00000260381	RP11-429P3.5	-3.63054	-0.79771	-12.1452	1.86e-08	7.19e-07	9.92893			16	50100339	50121943	-1
ENSG00000227193	RP11-439A17.4	0.939328	0.257148	4.05358	0.00137373	0.00568069	-1.72731			1	121118126	121146826	1
ENSG00000215246	RP11-43F13.3	1.39964	1.01301	4.82642	0.000333101	0.00190113	-0.351283	100506688		5	987180	997308	-1
ENSG00000266036	RP11-452I5.2	-1.53292	7.8798	-3.99696	0.00152785	0.00624503	-1.51977			17	74747319	74748912	-1
ENSG00000264187	RP11-45M22.4	-0.30943	1.86761	-1.27069	0.226163	0.347307	-6.72309			17	17202649	17237185	-1
ENSG00000237378	RP11-473M10.3	7.13352	-0.511212	20.2068	3.48e-11	4.31e-09	15.3827			13	63746741	63751080	1
ENSG00000261889	RP11-473M20.16	0.768654	6.50975	2.74421	0.016753	0.0435894	-4.02096			16	3156736	3157483	-1
ENSG00000272933	RP11-47A8.5	-0.37499	0.133497	-2.22649	0.044334	0.0962758	-5.21915			10	102642792	102644140	-1
ENSG00000277103	RP11-520B13.8	-0.00992111	0.279363	-0.0376754	0.97052	0.979906	-7.48754			9	97151894	97152694	-1
ENSG00000279798	RP11-528M18.2	-5.42233	4.39034	-19.1153	6.99e-11	7.31e-09	15.4402			12	97563257	97563971	-1
ENSG00000259006	RP11-566K11.4	0.998459	0.0649136	4.29679	0.000873159	0.00400521	-1.22048			16	89919827	89922662	-1
ENSG00000263826	RP11-573D15.9	0.145912	1.58162	0.568885	0.579154	0.703021	-7.37213			3	186781780	186784179	-1
ENSG00000279605	RP11-661A12.8	0.153875	-0.0689563	0.694426	0.499668	0.634056	-7.15356			8	143578358	143583304	1
ENSG00000255125	RP11-685M7.5	0.87214	2.58515	3.53607	0.00366546	0.0127698	-2.82106			11	10783313	10801625	1
ENSG00000246090	RP11-696N14.1	1.18089	0.444823	5.3584	0.000131205	0.000887964	0.6688	100507053		4	99088857	99301356	1
ENSG00000261069	RP11-701H24.4	-0.0333604	3.77415	-0.0488802	0.96176	0.976148	-7.44903			15	25087661	25088896	1
ENSG00000270704	RP11-701H24.5	0.23499	6.11317	0.966087	0.351672	0.490642	-6.75548			15	24984864	24985173	1
ENSG00000270246	RP11-701H24.8	-0.411865	1.53613	-2.17652	0.0485926	0.103541	-5.37911			15	25041918	25042428	1
ENSG00000214265	RP11-701H24.9	-0.174312	5.64615	-0.703764	0.494023	0.628181	-7.02554			15	24955034	25000276	1
ENSG00000260735	RP11-72I8.1	-0.0387853	0.168324	-0.224318	0.826006	0.893847	-7.44261	100505915		16	15094411	15109197	1
ENSG00000257390	RP11-762I7.5	0.48153	0.159955	2.67741	0.0190278	0.0486396	-4.37377			12	55757275	55827546	-1
ENSG00000245904	RP11-796E2.4	-0.533814	0.264996	-2.53301	0.0250205	0.060701	-4.69829			12	92145573	92189660	1
ENSG00000273729	RP11-7F17.8	-0.846313	0.0480181	-4.31759	0.000840213	0.00389739	-1.25883			14	77028086	77031572	1
ENSG00000256148	RP11-809N8.5	-1.07828	1.72999	-4.48919	0.00061287	0.002965	-1.02572			11	73510658	73510820	1
ENSG00000274021	RP11-823E8.3	0.656778	0.692305	2.7498	0.0165751	0.0432598	-4.30988			12	89351015	89353271	1
ENSG00000273247	RP11-83A24.2	1.58516	1.82348	4.28058	0.000899767	0.0040894	-1.40804			4	139411927	139454034	-1
ENSG00000245482	RP11-847H18.2	0.362441	1.49795	1.64893	0.123163	0.216518	-6.21779			12	34022281	34046417	-1
ENSG00000255508	RP11-864I4.1	-0.0214767	1.06291	-0.120098	0.906246	0.943456	-7.54068			11	62559603	62591531	-1
ENSG00000264345	RP11-958F21.1	1.28361	1.474	5.62583	8.33e-05	0.000612617	1.04707			18	24933487	24987682	-1
ENSG00000257337	RP11-983P16.4	-0.255748	1.41947	-0.886843	0.391314	0.532483	-7.13842	283335		12	53014596	53054438	-1
ENSG00000282988	RP1-34B20.21	-0.546786	1.08219	-3.14931	0.00770224	0.0234667	-3.59858			6	26195595	26199293	-1
ENSG00000259943	RP1-39G22.7	-0.360791	0.89312	-2.17559	0.0486755	0.103541	-5.38108			1	40256427	40257967	-1
ENSG00000231424	RP1-45C12.1	5.07145	-0.915532	12.1298	1.89e-08	7.19e-07	9.88497			1	171247580	171251794	-1
ENSG00000279159	RP3-394A18.1	-0.277843	1.93736	-1.54865	0.145516	0.245367	-6.35832			22	29978950	30028236	-1
ENSG00000260464	RP4-561L24.3	0.324939	4.26193	1.44614	0.171872	0.279745	-6.3692			1	93847174	93848939	1
ENSG00000270605	RP5-1092A3.4	0.266409	0.395486	1.31801	0.210308	0.327631	-6.61694			1	28239509	28241453	-1
ENSG00000246350	RP5-1186N24.3	1.15848	6.07238	4.82046	0.000336672	0.0019127	-0.129129			6	28587378	28591747	1
ENSG00000233421	RP5-875O13.1	0.656795	4.52936	2.28731	0.0396249	0.0879226	-5.02838	100132147		1	16533886	16536172	-1
ENSG00000231987	RP5-898J17.1	-2.10494	0.270021	-7.29747	6.11e-06	7.57e-05	3.88771	101928241		1	96254069	96374125	-1
ENSG00000230186	RP5-998N21.7	0.939328	0.257148	4.05358	0.00137373	0.00568069	-1.72731			1	143905487	143934776	1
ENSG00000147403	RPL10	0.0945638	0.3151	0.327044	0.748854	0.836299	-7.43086	6134	ribosomal protein L10 [Source:HGNC Symbol;Acc:HGNC:10298]	X	154389955	154409168	1
ENSG00000197958	RPL12	-0.234873	0.46767	-1.22351	0.242903	0.365979	-6.75733	6136	ribosomal protein L12 [Source:HGNC Symbol;Acc:HGNC:10302]	9	127447674	127451405	-1
ENSG00000167526	RPL13	-0.914501	6.35874	-2.07405	0.0585516	0.119074	-5.22634	6137	ribosomal protein L13 [Source:HGNC Symbol;Acc:HGNC:10303]	16	89560657	89566828	1
ENSG00000142541	RPL13A	0.253193	6.48736	0.937305	0.365731	0.50497	-6.74573	23521	ribosomal protein L13a [Source:HGNC Symbol;Acc:HGNC:10304]	19	49487554	49492308	1
ENSG00000174748	RPL15	0.399065	1.89645	2.21078	0.0456339	0.0985485	-5.31847	6138	ribosomal protein L15 [Source:HGNC Symbol;Acc:HGNC:10306]	3	23916545	23923692	1
ENSG00000265681	RPL17	0.544118	8.83585	1.19947	0.251802	0.375283	-6.24988	6139	ribosomal protein L17 [Source:HGNC Symbol;Acc:HGNC:10307]	18	49488453	49492523	-1
ENSG00000105640	RPL18A	0.566887	1.75167	2.04542	0.0616553	0.124163	-5.59901	6142	ribosomal protein L18a [Source:HGNC Symbol;Acc:HGNC:10311]	19	17859876	17864153	1
ENSG00000122026	RPL21	0.367794	7.52343	0.972056	0.348805	0.487918	-6.61225	6144	ribosomal protein L21 [Source:HGNC Symbol;Acc:HGNC:10313]	13	27251309	27256691	1
ENSG00000125691	RPL23	0.473534	1.1566	1.92712	0.0761597	0.146012	-5.78572	9349	ribosomal protein L23 [Source:HGNC Symbol;Acc:HGNC:10316]	17	38847865	38853843	-1
ENSG00000198242	RPL23A	0.920658	6.71856	2.17004	0.0491728	0.104363	-5.02632	6147	ribosomal protein L23a [Source:HGNC Symbol;Acc:HGNC:10317]	17	28719393	28724359	1
ENSG00000037241	RPL26L1	0.950279	-0.212545	3.77202	0.00233739	0.0087723	-2.16061	51121	ribosomal protein L26 like 1 [Source:HGNC Symbol;Acc:HGNC:17050]	5	172958729	172969771	1
ENSG00000166441	RPL27A	0.00572452	2.36437	0.034166	0.973265	0.981587	-7.53707	6157	ribosomal protein L27a [Source:HGNC Symbol;Acc:HGNC:10329]	11	8682411	8714759	1
ENSG00000108107	RPL28	-0.141726	0.900824	-0.803994	0.435891	0.571876	-7.20708	6158 102465483	ribosomal protein L28 [Source:HGNC Symbol;Acc:HGNC:10330]	19	55385345	55403250	1
ENSG00000100316	RPL3	0.639397	9.55927	1.69129	0.114657	0.205206	-5.53692	6122	ribosomal protein L3 [Source:HGNC Symbol;Acc:HGNC:10332]	22	39312882	39320389	-1
ENSG00000144713	RPL32	0.7693	3.89201	2.21795	0.0450358	0.0975118	-5.20119	6161	ribosomal protein L32 [Source:HGNC Symbol;Acc:HGNC:10336]	3	12834485	12841588	-1
ENSG00000109475	RPL34	0.422191	6.22595	1.50477	0.156344	0.259961	-6.10865	6164	ribosomal protein L34 [Source:HGNC Symbol;Acc:HGNC:10340]	4	108620566	108630412	1
ENSG00000145592	RPL37	0.396961	-0.114008	1.61012	0.131433	0.226713	-6.11134	6167	ribosomal protein L37 [Source:HGNC Symbol;Acc:HGNC:10347]	5	40825262	40835335	-1
ENSG00000197756	RPL37A	0.277751	0.992129	1.63305	0.126489	0.221226	-6.23872	6168	ribosomal protein L37a [Source:HGNC Symbol;Acc:HGNC:10348]	2	216498189	216579180	1
ENSG00000198918	RPL39	0.0619307	0.241877	0.2783	0.78517	0.861359	-7.43579	6170	ribosomal protein L39 [Source:HGNC Symbol;Acc:HGNC:10350]	X	119786504	119791643	-1
ENSG00000174444	RPL4	0.530862	8.35155	0.874657	0.39767	0.536273	-6.62504	6124	ribosomal protein L4 [Source:HGNC Symbol;Acc:HGNC:10353]	15	66498015	66524532	-1
ENSG00000229117	RPL41	-0.311135	0.588837	-1.85278	0.0868038	0.162642	-5.8954	6171	ribosomal protein L41 [Source:HGNC Symbol;Acc:HGNC:10354]	12	56116586	56117943	1
ENSG00000122406	RPL5	0.873146	8.21571	2.75925	0.016279	0.0427153	-3.83844	6125	ribosomal protein L5 [Source:HGNC Symbol;Acc:HGNC:10360]	1	92832025	92841924	1
ENSG00000089009	RPL6	-0.0229619	0.407907	-0.107575	0.91598	0.948529	-7.49899	6128	ribosomal protein L6 [Source:HGNC Symbol;Acc:HGNC:10362]	12	112405190	112418838	-1
ENSG00000148303	RPL7A	1.78798	7.53324	4.59245	0.000507746	0.00258252	-0.424218	6130	ribosomal protein L7a [Source:HGNC Symbol;Acc:HGNC:10364]	9	133348214	133351426	1
ENSG00000089157	RPLP0	-0.642005	2.64394	-2.62593	0.0209836	0.0528754	-4.56563	6175	ribosomal protein lateral stalk subunit P0 [Source:HGNC Symbol;Acc:HGNC:10371]	12	120196686	120201235	-1
ENSG00000177600	RPLP2	0.0266728	0.307421	0.110039	0.914063	0.94694	-7.48231	6181	ribosomal protein lateral stalk subunit P2 [Source:HGNC Symbol;Acc:HGNC:10377]	11	809647	812880	1
ENSG00000277209	RPPH1	-0.140988	4.68837	-0.659133	0.521343	0.654471	-7.14549		ribonuclease P RNA component H1 [Source:HGNC Symbol;Acc:HGNC:19273]	14	20343075	20343407	-1
ENSG00000259001	RPPH1	-0.138404	4.69025	-0.646206	0.529416	0.658977	-7.15408			14	20343048	20343685	-1
ENSG00000163125	RPRD2	0.021909	1.48043	0.110914	0.913382	0.94694	-7.53885	23248	regulation of nuclear pre-mRNA domain containing 2 [Source:HGNC Symbol;Acc:HGNC:29039]	1	150363091	150476566	1
ENSG00000142534	RPS11	0.0838034	1.66063	0.197203	0.846726	0.908934	-7.5224	6205	ribosomal protein S11 [Source:HGNC Symbol;Acc:HGNC:10384]	19	49496365	49499689	1
ENSG00000110700	RPS13	-0.397914	1.26719	-2.26953	0.0409504	0.0901636	-5.22344	6207	ribosomal protein S13 [Source:HGNC Symbol;Acc:HGNC:10386]	11	17074389	17077787	-1
ENSG00000164587	RPS14	0.25409	-0.0350017	1.28423	0.221529	0.341461	-6.5776	6208	ribosomal protein S14 [Source:HGNC Symbol;Acc:HGNC:10387]	5	150443190	150449756	-1
ENSG00000134419	RPS15A	0.175296	-0.191922	0.788441	0.444613	0.580246	-7.04292	6210	ribosomal protein S15a [Source:HGNC Symbol;Acc:HGNC:10389]	16	18781295	18790383	-1
ENSG00000182774	RPS17	-0.36798	0.602856	-1.98204	0.0690754	0.135257	-5.68992	6218	ribosomal protein S17 [Source:HGNC Symbol;Acc:HGNC:10397]	15	82536753	82540564	-1
ENSG00000231500	RPS18	0.582274	-0.075767	2.38618	0.0329679	0.0764621	-4.8399	6222	ribosomal protein S18 [Source:HGNC Symbol;Acc:HGNC:10401]	6	33272010	33276510	1
ENSG00000105372	RPS19	0.534694	-0.274119	2.36096	0.0345566	0.0791805	-4.84041	6223	ribosomal protein S19 [Source:HGNC Symbol;Acc:HGNC:10402]	19	41859918	41872926	1
ENSG00000140988	RPS2	-0.030499	2.65331	-0.141577	0.88959	0.933693	-7.51841	6187	ribosomal protein S2 [Source:HGNC Symbol;Acc:HGNC:10404]	16	1962052	1964860	-1
ENSG00000008988	RPS20	0.398	3.1066	1.72228	0.108766	0.196652	-6.06467	6224	ribosomal protein S20 [Source:HGNC Symbol;Acc:HGNC:10405]	8	56067295	56074581	-1
ENSG00000186468	RPS23	0.263429	-0.0750235	1.24501	0.235158	0.357354	-6.61277	6228	ribosomal protein S23 [Source:HGNC Symbol;Acc:HGNC:10410]	5	82273358	82278577	-1
ENSG00000213741	RPS29	0.274974	0.297342	1.03257	0.320681	0.457042	-6.92672	6235	ribosomal protein S29 [Source:HGNC Symbol;Acc:HGNC:10419]	14	49570984	49599164	-1
ENSG00000149273	RPS3	1.29824	9.52258	3.86219	0.00197016	0.00760136	-1.64525	6188	ribosomal protein S3 [Source:HGNC Symbol;Acc:HGNC:10420]	11	75399486	75422280	1
ENSG00000145425	RPS3A	1.0994	2.95791	5.00753	0.00024153	0.00149567	-0.017705	6189	ribosomal protein S3A [Source:HGNC Symbol;Acc:HGNC:10421]	4	151099573	151104652	1
ENSG00000137154	RPS6	0.349758	0.589531	1.55839	0.143203	0.242456	-6.31664	6194	ribosomal protein S6 [Source:HGNC Symbol;Acc:HGNC:10429]	9	19375715	19380254	-1
ENSG00000171863	RPS7	0.0885518	0.905841	0.561172	0.584248	0.707322	-7.37544	6201	ribosomal protein S7 [Source:HGNC Symbol;Acc:HGNC:10440]	2	3575205	3580919	1
ENSG00000142937	RPS8	-0.0712607	7.13836	-0.289079	0.777091	0.856633	-7.09319	6202	ribosomal protein S8 [Source:HGNC Symbol;Acc:HGNC:10441]	1	44775251	44778779	1
ENSG00000168028	RPSA	0.158057	4.11913	0.872342	0.398886	0.53727	-7.02477	3921	ribosomal protein SA [Source:HGNC Symbol;Acc:HGNC:6502]	3	39406689	39412542	1
ENSG00000171848	RRM2	0.527147	-0.176694	2.15396	0.0506383	0.106736	-5.21654	6241	ribonucleotide reductase regulatory subunit M2 [Source:HGNC Symbol;Acc:HGNC:10452]	2	10122328	10131419	1
ENSG00000159579	RSPRY1	0.39714	0.099109	1.71264	0.11057	0.199042	-6.01072	89970	ring finger and SPRY domain containing 1 [Source:HGNC Symbol;Acc:HGNC:29420]	16	57186137	57240475	1
ENSG00000111011	RSRC2	-0.0403714	0.819882	-0.177083	0.862179	0.917281	-7.52433	65117	arginine and serine rich coiled-coil 2 [Source:HGNC Symbol;Acc:HGNC:30559]	12	122503458	122527000	-1
ENSG00000254656	RTL1	-3.75233	-0.222999	-10.025	1.79e-07	3.69e-06	7.70869	388015	retrotransposon-like 1 [Source:HGNC Symbol;Acc:HGNC:14665]	14	100880655	100884847	-1
ENSG00000115310	RTN4	-0.402571	0.339697	-2.07581	0.0583651	0.118792	-5.50822	57142	reticulon 4 [Source:HGNC Symbol;Acc:HGNC:14085]	2	54972187	55112621	-1
ENSG00000211456	SACM1L	0.604874	0.855781	3.40835	0.00468192	0.0157142	-3.07431	22908	SAC1 suppressor of actin mutations 1-like (yeast) [Source:HGNC Symbol;Acc:HGNC:17059]	3	45689056	45745424	1
ENSG00000151835	SACS	0.733368	0.314517	3.3329	0.00541175	0.017638	-3.14758	26278	sacsin molecular chaperone [Source:HGNC Symbol;Acc:HGNC:10519]	13	23328826	23411513	-1
ENSG00000205323	SARNP	0.569684	-0.0639576	2.72918	0.0172404	0.0446699	-4.21713	84324	SAP domain containing ribonucleoprotein [Source:HGNC Symbol;Acc:HGNC:24432]	12	55752463	55817756	-1
ENSG00000111961	SASH1	1.95367	0.0339298	7.00202	9.44e-06	0.000107232	3.55841	23328	SAM and SH3 domain containing 1 [Source:HGNC Symbol;Acc:HGNC:19182]	6	148272304	148552050	1
ENSG00000100241	SBF1	-0.367481	0.75393	-1.82627	0.0909122	0.168555	-5.94812	6305	SET binding factor 1 [Source:HGNC Symbol;Acc:HGNC:10542]	22	50445000	50475024	-1
ENSG00000252947	SCARNA1	0.171642	0.213252	0.850616	0.410414	0.546263	-7.09026	677774	small Cajal body-specific RNA 1 [Source:HGNC Symbol;Acc:HGNC:32555]	1	27834401	27834566	1
ENSG00000239002	SCARNA10	1.4208	1.68447	4.5651	0.000533625	0.0026649	-0.875894	692148	small Cajal body-specific RNA 10 [Source:HGNC Symbol;Acc:HGNC:32567]	12	6510222	6510551	1
ENSG00000251898	SCARNA11	0.940488	3.29508	5.27419	0.000151668	0.000999152	0.47655	677780	small Cajal body-specific RNA 11 [Source:HGNC Symbol;Acc:HGNC:32568]	12	6581474	6581609	-1
ENSG00000238795	SCARNA12	0.435242	2.21511	1.90773	0.0788156	0.150059	-5.81683	677777	small Cajal body-specific RNA 12 [Source:HGNC Symbol;Acc:HGNC:32569]	12	6967337	6967606	-1
ENSG00000252481	SCARNA13	0.377858	3.21341	2.07595	0.0583504	0.118792	-5.49514	677768	small Cajal body-specific RNA 13 [Source:HGNC Symbol;Acc:HGNC:32570]	14	95533355	95533629	-1
ENSG00000252712	SCARNA14	1.38914	3.82714	7.72783	3.31e-06	4.58e-05	4.49161	692149	small Cajal body-specific RNA 14 [Source:HGNC Symbol;Acc:HGNC:32571]	15	66347207	66347342	-1
ENSG00000252690	SCARNA15	0.677372	9.60012	1.79768	0.0955397	0.17608	-5.37347		small Cajal body-specific RNA 15 [Source:HGNC Symbol;Acc:HGNC:32572]	15	82752884	82757208	1
ENSG00000277864	SCARNA15	0.674502	9.59593	1.79066	0.096707	0.177571	-5.38456	677778	Small Cajal body specific RNA 15 [Source:RFAM;Acc:RF00426]	15	82755945	82756071	1
ENSG00000275143	SCARNA16	-0.177863	0.962251	-1.07226	0.303153	0.438104	-6.95646	677781	small Cajal body-specific RNA 16 [Source:HGNC Symbol;Acc:HGNC:32573]	17	77089307	77089493	1
ENSG00000238835	SCARNA18	1.21362	0.270013	5.06526	0.000218206	0.00136151	0.182515	677765	small Cajal body-specific RNA 18 [Source:HGNC Symbol;Acc:HGNC:32559]	5	83064204	83064337	-1
ENSG00000252139	SCARNA18	0.240197	-0.055672	0.843931	0.414005	0.549861	-7.03272		small Cajal body-specific RNA 18 [Source:RFAM;Acc:RF00283]	18	49814361	49814443	1
ENSG00000278249	SCARNA2	0.215651	3.69814	0.936341	0.366208	0.505066	-7.00075	677766	small Cajal body-specific RNA 2 [Source:HGNC Symbol;Acc:HGNC:32558]	1	109100193	109100612	1
ENSG00000270066	SCARNA2	0.215651	3.69814	0.936341	0.366208	0.505066	-7.00075	677766	small Cajal body-specific RNA 2 [Source:EntrezGene;Acc:677766]	1	109100193	109100619	1
ENSG00000252906	SCARNA3	0.385824	6.31794	1.33131	0.206016	0.322364	-6.32765	677679	small Cajal body-specific RNA 3 [Source:HGNC Symbol;Acc:HGNC:32577]	1	175968398	175968540	-1
ENSG00000280466	SCARNA4	0.944936	3.38108	4.57294	0.000526065	0.00264313	-0.802772		small Cajal body-specific RNA 4 [Source:HGNC Symbol;Acc:HGNC:32560]	1	155925958	155926085	-1
ENSG00000281394	SCARNA4	0.944936	3.38108	4.57294	0.000526065	0.00264313	-0.802772	677771	Small Cajal body specific RNA 4 [Source:RFAM;Acc:RF00423]	1	155925958	155926086	-1
ENSG00000252010	SCARNA5	0.133487	2.0088	0.620579	0.545629	0.673915	-7.33934	677775	small Cajal body-specific RNA 5 [Source:HGNC Symbol;Acc:HGNC:32561]	2	233275727	233276002	1
ENSG00000251791	SCARNA6	-0.514769	3.09804	-2.08134	0.0577845	0.118193	-5.49991	677772	small Cajal body-specific RNA 6 [Source:HGNC Symbol;Acc:HGNC:32562]	2	233288676	233288940	1
ENSG00000238741	SCARNA7	-0.0436214	3.57877	-0.177598	0.861783	0.917281	-7.44939	677767	small Cajal body-specific RNA 7 [Source:HGNC Symbol;Acc:HGNC:32563]	3	160514907	160515236	-1
ENSG00000251733	SCARNA8	0.416939	1.06387	2.27824	0.0402959	0.0891186	-5.19561	677776	small Cajal body-specific RNA 8 [Source:HGNC Symbol;Acc:HGNC:32564]	9	19063656	19063786	-1
ENSG00000254911	SCARNA9	1.29569	9.05013	3.86292	0.00196741	0.00760136	-1.67889	619383 100158262	small Cajal body-specific RNA 9 [Source:HGNC Symbol;Acc:HGNC:32566]	11	93721513	93721865	1
ENSG00000099194	SCD	0.0554418	1.82754	0.321576	0.752898	0.838924	-7.4876	6319	stearoyl-CoA desaturase [Source:HGNC Symbol;Acc:HGNC:10571]	10	100347124	100364834	1
ENSG00000180900	SCRIB	-0.297728	2.96831	-1.52629	0.150952	0.25213	-6.36454	23513 100126338	scribbled planar cell polarity protein [Source:HGNC Symbol;Acc:HGNC:30377]	8	143790920	143815379	-1
ENSG00000146555	SDK1	-0.0795475	2.2712	-0.385238	0.706306	0.803343	-7.4603	221935	sidekick cell adhesion molecule 1 [Source:HGNC Symbol;Acc:HGNC:19307]	7	3301448	4269000	1
ENSG00000140612	SEC11A	0.0728774	-0.11683	0.305243	0.765025	0.847196	-7.34862	23478	SEC11 homolog A, signal peptidase complex subunit [Source:HGNC Symbol;Acc:HGNC:17718]	15	84669538	84716716	-1
ENSG00000176986	SEC24C	1.0884	1.98433	3.16209	0.0075153	0.0229536	-3.56289	9632	SEC24 homolog C, COPII coat complex component [Source:HGNC Symbol;Acc:HGNC:10705]	10	73744384	73772161	1
ENSG00000058262	SEC61A1	0.333502	0.332937	1.43746	0.174276	0.28307	-6.45166	29927	Sec61 translocon alpha 1 subunit [Source:HGNC Symbol;Acc:HGNC:18276]	3	128051641	128071683	1
ENSG00000075223	SEMA3C	2.35288	-0.861906	6.28309	2.85e-05	0.000259626	2.61633	10512	semaphorin 3C [Source:HGNC Symbol;Acc:HGNC:10725]	7	80742538	80922359	-1
ENSG00000168758	SEMA4C	1.20454	0.661521	5.97603	4.67e-05	0.000385989	1.71545	54910	semaphorin 4C [Source:HGNC Symbol;Acc:HGNC:10731]	2	96859716	96870757	-1
ENSG00000277957	SENP3-EIF4A1	0.435014	0.260948	1.94286	0.0740641	0.142879	-5.68264		SENP3-EIF4A1 readthrough (NMD candidate) [Source:HGNC Symbol;Acc:HGNC:49182]	17	7563287	7578715	1
ENSG00000149257	SERPINH1	-0.279535	0.22152	-1.58021	0.138132	0.23548	-6.26043	871	serpin family H member 1 [Source:HGNC Symbol;Acc:HGNC:1546]	11	75562056	75572783	1
ENSG00000179833	SERTAD2	0.16771	-0.0410182	0.918995	0.374876	0.514441	-6.97273	9792	SERTA domain containing 2 [Source:HGNC Symbol;Acc:HGNC:30784]	2	64631621	64751005	-1
ENSG00000149212	SESN3	0.572577	0.908311	3.40454	0.00471626	0.0157654	-3.08562	143686	sestrin 3 [Source:HGNC Symbol;Acc:HGNC:23060]	11	95165513	95232541	-1
ENSG00000119335	SET	-0.632213	0.13002	-2.81027	0.0147664	0.0397138	-4.16263	6418	SET nuclear proto-oncogene [Source:HGNC Symbol;Acc:HGNC:10760]	9	128683424	128696400	1
ENSG00000168137	SETD5	-0.000349887	0.0428344	-0.00146493	0.998853	0.999661	-7.44377	55209	SET domain containing 5 [Source:HGNC Symbol;Acc:HGNC:25566]	3	9397615	9479240	1
ENSG00000155542	SETD9	0.271098	0.0438631	1.1447	0.27302	0.40016	-6.75875	133383	SET domain containing 9 [Source:HGNC Symbol;Acc:HGNC:28508]	5	56909260	56925532	1
ENSG00000233998	SETP5	3.85606	0.497151	6.51432	1.98e-05	0.000194888	2.87539		SET pseudogene 5 [Source:HGNC Symbol;Acc:HGNC:42924]	9	137640986	137641547	-1
ENSG00000189091	SF3B3	0.123599	0.468363	0.684733	0.505567	0.639531	-7.26077	23450	splicing factor 3b subunit 3 [Source:HGNC Symbol;Acc:HGNC:10770]	16	70523788	70577670	1
ENSG00000116560	SFPQ	-0.206651	0.843558	-1.27465	0.2248	0.3457	-6.72232	6421	splicing factor proline and glutamine rich [Source:HGNC Symbol;Acc:HGNC:10774]	1	35176378	35193148	-1
ENSG00000163069	SGCB	0.728033	-0.300727	3.52674	0.00373148	0.0129452	-2.62551	6443	sarcoglycan beta [Source:HGNC Symbol;Acc:HGNC:10806]	4	52020706	52038482	-1
ENSG00000181523	SGSH	0.491912	3.54625	2.58254	0.0227829	0.0565373	-4.58054	6448	N-sulfoglucosamine sulfohydrolase [Source:HGNC Symbol;Acc:HGNC:10818]	17	80206716	80220923	-1
ENSG00000141258	SGSM2	0.292581	0.00530994	1.64991	0.122959	0.216314	-6.08861	9905	small G protein signaling modulator 2 [Source:HGNC Symbol;Acc:HGNC:29026]	17	2337498	2381058	1
ENSG00000109686	SH3D19	1.08475	0.352764	4.12392	0.00120424	0.00504722	-1.60749	152503	SH3 domain containing 19 [Source:HGNC Symbol;Acc:HGNC:30418]	4	151102751	151325632	-1
ENSG00000107957	SH3PXD2A	-1.08098	0.623221	-5.58804	8.88e-05	0.000645135	0.988573	9644	SH3 and PX domains 2A [Source:HGNC Symbol;Acc:HGNC:23664]	10	103594027	103855543	-1
ENSG00000174705	SH3PXD2B	0.521008	0.367029	2.58944	0.0224873	0.0559808	-4.57376	285590	SH3 and PX domains 2B [Source:HGNC Symbol;Acc:HGNC:29242]	5	172325000	172454523	-1
ENSG00000138606	SHF	1.10671	7.96618	3.97684	0.00158679	0.00643287	-1.54858	90525	Src homology 2 domain containing F [Source:HGNC Symbol;Acc:HGNC:25116]	15	45167214	45201175	-1
ENSG00000160584	SIK3	0.933168	1.23292	3.36654	0.00507308	0.0167547	-3.16076	23387	SIK family kinase 3 [Source:HGNC Symbol;Acc:HGNC:29165]	11	116843402	117098437	-1
ENSG00000155380	SLC16A1	-0.44692	1.38157	-2.34024	0.0359167	0.0810991	-5.09795	6566	solute carrier family 16 member 1 [Source:HGNC Symbol;Acc:HGNC:10922]	1	112911847	112957013	-1
ENSG00000105281	SLC1A5	-0.144575	0.38968	-0.552147	0.590237	0.712297	-7.34572	6510	solute carrier family 1 member 5 [Source:HGNC Symbol;Acc:HGNC:10943]	19	46774883	46788594	-1
ENSG00000144136	SLC20A1	0.136306	0.433869	0.728304	0.479373	0.61333	-7.22426	6574	solute carrier family 20 member 1 [Source:HGNC Symbol;Acc:HGNC:10946]	2	112645857	112663827	1
ENSG00000075415	SLC25A3	1.13106	3.67157	5.48704	0.000105347	0.000742387	0.878286	5250	solute carrier family 25 member 3 [Source:HGNC Symbol;Acc:HGNC:10989]	12	98593591	98606379	1
ENSG00000225697	SLC26A6	-0.402489	1.42106	-1.81486	0.0927338	0.171675	-5.97359	65010 102465495	solute carrier family 26 member 6 [Source:HGNC Symbol;Acc:HGNC:14472]	3	48625723	48635493	-1
ENSG00000109667	SLC2A9	1.21335	0.229257	3.90881	0.00180397	0.0070703	-1.97575	56606	solute carrier family 2 member 9 [Source:HGNC Symbol;Acc:HGNC:13446]	4	9771153	10054936	-1
ENSG00000157593	SLC35B2	1.34987	0.289367	5.66789	7.77e-05	0.000576066	1.25311	347734 100616124	solute carrier family 35 member B2 [Source:HGNC Symbol;Acc:HGNC:16872]	6	44254096	44257890	-1
ENSG00000157637	SLC38A10	0.0907895	0.494418	0.498292	0.626622	0.741234	-7.38027	124565	solute carrier family 38 member 10 [Source:HGNC Symbol;Acc:HGNC:28237]	17	81245000	81295547	-1
ENSG00000134294	SLC38A2	0.360135	0.552613	2.12197	0.053678	0.111544	-5.43367	54407	solute carrier family 38 member 2 [Source:HGNC Symbol;Acc:HGNC:13448]	12	46358189	46372867	-1
ENSG00000177058	SLC38A9	1.19773	-0.424315	3.52237	0.00376278	0.0130173	-2.55948	153129	solute carrier family 38 member 9 [Source:HGNC Symbol;Acc:HGNC:26907]	5	55625845	55773194	-1
ENSG00000143570	SLC39A1	0.244668	-0.138158	1.24523	0.235078	0.357354	-6.59792	27173	solute carrier family 39 member 1 [Source:HGNC Symbol;Acc:HGNC:12876]	1	153959099	153968184	-1
ENSG00000029364	SLC39A9	0.100753	0.229727	0.438365	0.668336	0.773222	-7.37303	55334	solute carrier family 39 member 9 [Source:HGNC Symbol;Acc:HGNC:20182]	14	69398015	69462388	1
ENSG00000168003	SLC3A2	-0.0886924	0.999744	-0.472251	0.644596	0.75553	-7.42938	6520	solute carrier family 3 member 2 [Source:HGNC Symbol;Acc:HGNC:11026]	11	62856102	62888875	1
ENSG00000138074	SLC5A6	0.538104	0.543353	2.42351	0.030744	0.0718423	-4.89742	8884	solute carrier family 5 member 6 [Source:HGNC Symbol;Acc:HGNC:11041]	2	27199587	27212958	-1
ENSG00000139514	SLC7A1	0.565337	-0.234817	2.57804	0.022978	0.0566898	-4.45575	6541	solute carrier family 7 member 1 [Source:HGNC Symbol;Acc:HGNC:11057]	13	29509410	29595688	-1
ENSG00000103257	SLC7A5	-1.03482	1.49491	-5.04283	0.000226977	0.00141262	-0.00480192	8140	solute carrier family 7 member 5 [Source:HGNC Symbol;Acc:HGNC:11063]	16	87830023	87869488	-1
ENSG00000109062	SLC9A3R1	-1.53208	7.88099	-3.99522	0.00153285	0.00625514	-1.52297	9368 100500847	SLC9A3 regulator 1 [Source:HGNC Symbol;Acc:HGNC:11075]	17	74748613	74769353	1
ENSG00000164037	SLC9B1	0.598372	0.615916	2.74171	0.0168331	0.0437519	-4.32095	150159	solute carrier family 9 member B1 [Source:HGNC Symbol;Acc:HGNC:24244]	4	102885048	103019739	-1
ENSG00000184564	SLITRK6	4.94872	-1.86891	9.23172	4.6e-07	8.14e-06	6.80077	84189	SLIT and NTRK like family member 6 [Source:HGNC Symbol;Acc:HGNC:23503]	13	85792790	85799488	-1
ENSG00000175387	SMAD2	0.0586531	0.387874	0.235157	0.81776	0.886473	-7.46968	4087	SMAD family member 2 [Source:HGNC Symbol;Acc:HGNC:6768]	18	47808957	47931146	-1
ENSG00000127616	SMARCA4	0.282354	-0.211494	1.32487	0.208086	0.324987	-6.47506	6597	SWI/SNF related, matrix associated, actin dependent regulator of chromatin, subfamily a, member 4 [Source:HGNC Symbol;Acc:HGNC:11100]	19	10961001	11065395	1
ENSG00000153147	SMARCA5	0.113599	-0.226747	0.50259	0.623679	0.738457	-7.23113	8467	SWI/SNF related, matrix associated, actin dependent regulator of chromatin, subfamily a, member 5 [Source:HGNC Symbol;Acc:HGNC:11101]	4	143513463	143557486	1
ENSG00000173473	SMARCC1	-0.0756943	0.133746	-0.358727	0.725572	0.816186	-7.39517	6599	SWI/SNF related, matrix associated, actin dependent regulator of chromatin subfamily c member 1 [Source:HGNC Symbol;Acc:HGNC:11104]	3	47585272	47782106	-1
ENSG00000072501	SMC1A	1.17519	5.82403	3.77694	0.00231567	0.00870395	-2.1154	8243	structural maintenance of chromosomes 1A [Source:HGNC Symbol;Acc:HGNC:11111]	X	53374149	53422728	-1
ENSG00000113810	SMC4	0.0415717	0.175996	0.167174	0.869812	0.92261	-7.45159	10051	structural maintenance of chromosomes 4 [Source:HGNC Symbol;Acc:HGNC:14013]	3	160399274	160434962	1
ENSG00000180747	SMG1P3	-0.510772	0.503079	-2.96771	0.0109196	0.0311807	-3.9179		SMG1P3, nonsense mediated mRNA decay associated PI3K related kinase pseudogene 3 [Source:HGNC Symbol;Acc:HGNC:49860]	16	21446683	21520444	-1
ENSG00000183963	SMTN	0.871998	-0.0627833	3.416	0.00461368	0.0155273	-2.88593	6525	smoothelin [Source:HGNC Symbol;Acc:HGNC:11126]	22	31064105	31104757	1
ENSG00000115593	SMYD1	0.131651	1.23721	0.691273	0.501582	0.635508	-7.29454	150572	SET and MYND domain containing 1 [Source:HGNC Symbol;Acc:HGNC:20986]	2	88067780	88113387	1
ENSG00000255717	SNHG1	0.898723	12.5828	1.94323	0.0740167	0.142879	-4.91832		small nucleolar RNA host gene 1 [Source:HGNC Symbol;Acc:HGNC:32688]	11	62851988	62855914	-1
ENSG00000247092	SNHG10	-0.230078	0.70997	-1.17929	0.259465	0.384493	-6.82851		small nucleolar RNA host gene 10 [Source:HGNC Symbol;Acc:HGNC:27510]	14	95532297	95534872	-1
ENSG00000197989	SNHG12	-0.0165115	4.64571	-0.0821976	0.935745	0.960962	-7.37444	85028	small nucleolar RNA host gene 12 [Source:HGNC Symbol;Acc:HGNC:30062]	1	28578538	28582983	-1
ENSG00000224078	SNHG14	-0.106948	6.05886	-0.461901	0.651805	0.760849	-7.13142		small nucleolar RNA host gene 14 [Source:HGNC Symbol;Acc:HGNC:37462]	15	24978583	25419462	1
ENSG00000163597	SNHG16	1.38065	5.55221	5.28046	0.000150034	0.000992851	0.661251	100507246	small nucleolar RNA host gene 16 [Source:HGNC Symbol;Acc:HGNC:44352]	17	76557766	76565348	1
ENSG00000234912	SNHG20	-0.181213	1.01731	-1.04505	0.315089	0.451926	-6.98618	654434 102466864	small nucleolar RNA host gene 20 [Source:HGNC Symbol;Acc:HGNC:33099]	17	77086716	77094990	1
ENSG00000267322	SNHG22	0.103419	0.115614	0.385148	0.706371	0.803343	-7.37432	677769 103091864	small nucleolar RNA host gene 22 [Source:HGNC Symbol;Acc:HGNC:50285]	18	49814023	49851059	1
ENSG00000266402	SNHG25	-0.903838	1.31259	-2.965	0.0109766	0.0312878	-3.94892		small nucleolar RNA host gene 25 [Source:HGNC Symbol;Acc:HGNC:51534]	17	64145970	64146476	1
ENSG00000242125	SNHG3	0.942117	2.96256	3.57611	0.00339524	0.0120143	-2.72471	8420	small nucleolar RNA host gene 3 [Source:HGNC Symbol;Acc:HGNC:10118]	1	28505980	28510892	1
ENSG00000203875	SNHG5	0.152201	9.65952	0.357816	0.726238	0.816564	-6.83858		small nucleolar RNA host gene 5 [Source:HGNC Symbol;Acc:HGNC:21026]	6	85660950	85678736	-1
ENSG00000245910	SNHG6	-0.775051	4.48524	-2.08527	0.0573747	0.117549	-5.38101		small nucleolar RNA host gene 6 [Source:HGNC Symbol;Acc:HGNC:32965]	8	66921684	66926398	-1
ENSG00000233016	SNHG7	0.292431	2.46743	1.37943	0.191086	0.30282	-6.57798	84973	small nucleolar RNA host gene 7 [Source:HGNC Symbol;Acc:HGNC:28254]	9	136721366	136728184	-1
ENSG00000269893	SNHG8	0.00285685	1.87472	0.0120002	0.990608	0.994221	-7.54244	100093630	small nucleolar RNA host gene 8 [Source:HGNC Symbol;Acc:HGNC:33098]	4	118278709	118279823	1
ENSG00000281010	snoR1	0.508809	7.58064	1.56717	0.141143	0.239624	-5.89178		Small nucleolar RNA snoR1 [Source:RFAM;Acc:RF00345]	16	2155025	2155104	-1
ENSG00000221716	SNORA11	1.11727	-0.225767	2.3744	0.033701	0.0778707	-4.77623	677799	small nucleolar RNA, H/ACA box 11 [Source:HGNC Symbol;Acc:HGNC:32599]	X	54814370	54814497	1
ENSG00000238363	SNORA13	0.0967783	0.313772	0.368394	0.718523	0.810675	-7.41645	654322	small nucleolar RNA, H/ACA box 13 [Source:HGNC Symbol;Acc:HGNC:32601]	5	112161485	112161617	1
ENSG00000207181	SNORA14B	0.62044	0.545332	2.26018	0.0416636	0.0913281	-5.18224	677802	small nucleolar RNA, H/ACA box 14B [Source:HGNC Symbol;Acc:HGNC:32603]	1	235127803	235127937	-1
ENSG00000274582	SNORA16A	-0.24781	1.64391	-0.411826	0.687193	0.788293	-7.45319		small nucleolar RNA, H/ACA box 16A [Source:HGNC Symbol;Acc:HGNC:32605]	1	28580920	28581056	-1
ENSG00000280498	SNORA16A	-0.24781	1.64391	-0.411826	0.687193	0.788293	-7.45319	692073	small nucleolar RNA, H/ACA box 16A [Source:HGNC Symbol;Acc:HGNC:32605]	1	28580920	28581054	-1
ENSG00000281808	SNORA17	0.540226	0.264292	1.87168	0.0839768	0.158063	-5.78904		Small nucleolar RNA SNORA17 [Source:RFAM;Acc:RF00560]	9	136726748	136726879	-1
ENSG00000274998	SNORA17A	0.540226	0.264292	1.87168	0.0839768	0.158063	-5.78904	677804	small nucleolar RNA, H/ACA box 17A [Source:HGNC Symbol;Acc:HGNC:32607]	9	136726747	136726879	-1
ENSG00000280496	SNORA17B	0.398822	1.71636	1.6153	0.130303	0.225888	-6.26842	677824	small nucleolar RNA, H/ACA box 17B [Source:HGNC Symbol;Acc:HGNC:32636]	9	136726104	136726239	-1
ENSG00000276161	SNORA17B	0.398822	1.71636	1.6153	0.130303	0.225888	-6.26842		small nucleolar RNA, H/ACA box 17B [Source:HGNC Symbol;Acc:HGNC:32636]	9	136726105	136726234	-1
ENSG00000207145	SNORA18	0.80866	3.65793	1.11313	0.285861	0.416761	-6.82149	677805	small nucleolar RNA, H/ACA box 18 [Source:HGNC Symbol;Acc:HGNC:32608]	11	93733466	93733597	-1
ENSG00000206947	SNORA20	-0.164579	1.18556	-0.968333	0.350592	0.489524	-7.06424		Small nucleolar RNA SNORA20 [Source:RFAM;Acc:RF00401]	7	39329003	39329134	-1
ENSG00000201998	SNORA23	0.521477	0.561226	2.18177	0.0481282	0.10277	-5.32389	677808	small nucleolar RNA, H/ACA box 23 [Source:HGNC Symbol;Acc:HGNC:32613]	11	9428773	9428954	1
ENSG00000275994	SNORA24	-0.0908228	1.74729	-0.363009	0.722446	0.813779	-7.47188	677809	small nucleolar RNA, H/ACA box 24 [Source:HGNC Symbol;Acc:HGNC:32614]	4	118279190	118279320	1
ENSG00000207112	SNORA25	1.33402	0.769251	5.49092	0.000104656	0.000740664	0.871924	684959	small nucleolar RNA, H/ACA box 25 [Source:HGNC Symbol;Acc:HGNC:32615]	11	93730513	93730646	-1
ENSG00000212588	SNORA26	-0.499202	0.678622	-2.18948	0.0474531	0.101591	-5.34841	677810	small nucleolar RNA, H/ACA box 26 [Source:HGNC Symbol;Acc:HGNC:32616]	4	52713249	52713370	1
ENSG00000272533	SNORA28	0.18684	1.20586	0.969438	0.350061	0.489059	-7.05835	677811	small nucleolar RNA, H/ACA box 28 [Source:HGNC Symbol;Acc:HGNC:32618]	14	103337849	103337974	1
ENSG00000206612	SNORA2A	1.3307	0.634243	3.85444	0.00199925	0.00768965	-2.13766	677793	small nucleolar RNA, H/ACA box 2A [Source:HGNC Symbol;Acc:HGNC:32584]	12	48656648	48656782	-1
ENSG00000221491	SNORA2C	0.479295	4.00415	0.41905	0.682038	0.784312	-7.33675	677815	small nucleolar RNA, H/ACA box 2C [Source:HGNC Symbol;Acc:HGNC:32624]	12	48654382	48654518	-1
ENSG00000199477	SNORA31	2.31461	2.85656	9.25581	4.47e-07	8.02e-06	6.55152	677814	small nucleolar RNA, H/ACA box 31 [Source:HGNC Symbol;Acc:HGNC:32621]	13	45337480	45337609	-1
ENSG00000206799	SNORA32	0.653199	1.56751	3.37058	0.00503396	0.0166699	-3.16621	692063	small nucleolar RNA, H/ACA box 32 [Source:HGNC Symbol;Acc:HGNC:32622]	11	93730979	93731099	-1
ENSG00000200534	SNORA33	1.38726	1.44665	6.92765	1.05e-05	0.000115089	3.20578	594839	small nucleolar RNA, H/ACA box 33 [Source:HGNC Symbol;Acc:HGNC:32623]	6	132817219	132817348	1
ENSG00000206948	SNORA36A	0.546246	-0.0819744	2.53675	0.0248443	0.0604464	-4.57536	677817	small nucleolar RNA, H/ACA box 36A [Source:HGNC Symbol;Acc:HGNC:32628]	X	154768528	154768659	1
ENSG00000222370	SNORA36B	0.0845018	4.3957	0.38942	0.703285	0.801305	-7.31801	677818	small nucleolar RNA, H/ACA box 36B [Source:HGNC Symbol;Acc:HGNC:32629]	1	220200546	220200676	-1
ENSG00000200983	SNORA3A	-0.0414109	1.88065	-0.232987	0.819409	0.887484	-7.51305	619562	small nucleolar RNA, H/ACA box 3A [Source:HGNC Symbol;Acc:HGNC:32586]	11	8684227	8684356	1
ENSG00000212607	SNORA3B	-0.275917	1.33035	-0.981338	0.34438	0.484676	-7.05146	677826	small nucleolar RNA, H/ACA box 3B [Source:HGNC Symbol;Acc:HGNC:32638]	11	8685439	8685569	1
ENSG00000273544	SNORA44	0.555761	3.4514	2.67642	0.0190636	0.048681	-4.41445	677825	small nucleolar RNA, H/ACA box 44 [Source:HGNC Symbol;Acc:HGNC:32637]	1	28580381	28580512	-1
ENSG00000207493	SNORA46	0.186524	1.02316	0.879457	0.395159	0.535486	-7.14047	677827	small nucleolar RNA, H/ACA box 46 [Source:HGNC Symbol;Acc:HGNC:32639]	16	58548499	58548633	-1
ENSG00000209582	SNORA48	-0.422072	1.0001	-1.63686	0.125684	0.220169	-6.24232	652965	small nucleolar RNA, H/ACA box 48 [Source:HGNC Symbol;Acc:HGNC:32641]	17	7574713	7574847	1
ENSG00000281311	SNORA50	-0.910916	1.20661	-2.93089	0.0117193	0.0327639	-4.01329		Small nucleolar RNA SNORA50 [Source:RFAM;Acc:RF00407]	17	64146337	64146471	1
ENSG00000206952	SNORA50A	1.03518	3.16064	4.36896	0.000764218	0.0035988	-1.19607		small nucleolar RNA, H/ACA box 50A [Source:HGNC Symbol;Acc:HGNC:32643]	16	58559796	58559929	-1
ENSG00000281910	SNORA50A	1.03518	3.16064	4.36896	0.000764218	0.0035988	-1.19607	677830	small nucleolar RNA, H/ACA box 50A [Source:HGNC Symbol;Acc:HGNC:32643]	16	58559796	58559931	-1
ENSG00000277887	SNORA50C	-0.910916	1.20661	-2.93089	0.0117193	0.0327639	-4.01329	677842	small nucleolar RNA, H/ACA box 50C [Source:HGNC Symbol;Acc:HGNC:32662]	17	64146339	64146471	1
ENSG00000271798	SNORA51	0.415764	0.493592	1.90491	0.079209	0.150653	-5.77935	677831	small nucleolar RNA, H/ACA box 51 [Source:HGNC Symbol;Acc:HGNC:32644]	20	2655067	2655198	1
ENSG00000212443	SNORA53	1.17406	3.5741	5.29786	0.000145598	0.000972092	0.537436	677832	small nucleolar RNA, H/ACA box 53 [Source:HGNC Symbol;Acc:HGNC:32646]	12	98599635	98599883	1
ENSG00000206693	SNORA56	-0.0530964	0.0991641	-0.228812	0.822584	0.890533	-7.42906	677835	small nucleolar RNA, H/ACA box 56 [Source:HGNC Symbol;Acc:HGNC:32650]	X	154774998	154775126	1
ENSG00000206597	SNORA57	-0.395156	1.37429	-0.636405	0.535584	0.665317	-7.33607	692158	small nucleolar RNA, H/ACA box 57 [Source:HGNC Symbol;Acc:HGNC:32651]	11	62665422	62665570	1
ENSG00000201129	SNORA58	0.177903	1.56781	0.904221	0.382369	0.522698	-7.11805		Small nucleolar RNA SNORA58 [Source:RFAM;Acc:RF00418]	1	154259727	154259862	1
ENSG00000249020	SNORA58	0.134346	3.47717	0.69216	0.501043	0.635157	-7.22147		small nucleolar RNA, H/ACA box 58 [Source:HGNC Symbol;Acc:HGNC:32652]	3	131479097	131479233	-1
ENSG00000206760	SNORA6	1.4229	0.18262	4.78372	0.00035955	0.00201951	-0.297452	574040	small nucleolar RNA, H/ACA box 6 [Source:HGNC Symbol;Acc:HGNC:32591]	3	39408389	39408539	1
ENSG00000278274	SNORA61	-0.996618	2.79938	-3.74438	0.00246342	0.00917579	-2.42651	677838	small nucleolar RNA, H/ACA box 61 [Source:HGNC Symbol;Acc:HGNC:32655]	1	28579764	28579893	-1
ENSG00000202363	SNORA62	0.0287542	3.91117	0.160542	0.874928	0.92503	-7.42514		small nucleolar RNA, H/ACA box 62 [Source:HGNC Symbol;Acc:HGNC:10107]	3	39411054	39411206	1
ENSG00000201448	SNORA63	-1.12938	0.705864	-5.18715	0.000176356	0.00114354	0.272674		Small nucleolar RNA SNORA63 [Source:RFAM;Acc:RF00092]	1	36418450	36418578	-1
ENSG00000200418	SNORA63	0.124337	1.17158	0.632699	0.537927	0.666999	-7.33496		Small nucleolar RNA SNORA63 [Source:RFAM;Acc:RF00092]	3	186786323	186786445	1
ENSG00000200320	SNORA63	-0.0948112	3.76041	-0.425364	0.677545	0.780668	-7.35504		small nucleolar RNA, H/ACA box 63 [Source:HGNC Symbol;Acc:HGNC:10106]	3	186787300	186787431	1
ENSG00000207405	SNORA64	-0.00504931	2.22878	-0.019933	0.9844	0.989192	-7.5398	26784	small nucleolar RNA, H/ACA box 64 [Source:HGNC Symbol;Acc:HGNC:10221]	16	1962973	1963106	-1
ENSG00000201302	SNORA65	0.813511	1.16529	4.26032	0.000934192	0.00412822	-1.4441	26783	small nucleolar RNA, H/ACA box 65 [Source:HGNC Symbol;Acc:HGNC:10222]	9	127448501	127448630	-1
ENSG00000207523	SNORA66	-0.158615	2.74949	-0.886442	0.391522	0.532483	-7.11674	26782	small nucleolar RNA, H/ACA box 66 [Source:HGNC Symbol;Acc:HGNC:10223]	1	92840719	92840851	1
ENSG00000207166	SNORA68	0.746769	1.56613	2.41949	0.030976	0.0722481	-4.95032	26780	small nucleolar RNA, H/ACA box 68 [Source:HGNC Symbol;Acc:HGNC:10225]	19	17862588	17862720	1
ENSG00000200620	SNORA7	1.14098	1.27946	3.78774	0.00226866	0.00854023	-2.34639		Small nucleolar RNA SNORA7 [Source:RFAM;Acc:RF00409]	X	15716208	15716346	1
ENSG00000235408	SNORA71B	-0.164943	1.7977	-0.916278	0.376246	0.515773	-7.10471		small nucleolar RNA, H/ACA box 71B [Source:HGNC Symbol;Acc:HGNC:10233]	20	38425083	38425354	-1
ENSG00000200354	SNORA71D	0.505194	2.06873	2.34589	0.0355405	0.080691	-5.08052	677840	small nucleolar RNA, H/ACA box 71D [Source:HGNC Symbol;Acc:HGNC:32657]	20	38433865	38433998	-1
ENSG00000207067	SNORA72	1.35631	0.0165844	5.15834	0.000185427	0.0011899	0.417292	26775	small nucleolar RNA, H/ACA box 72 [Source:HGNC Symbol;Acc:HGNC:10234]	8	98042086	98042217	-1
ENSG00000274266	SNORA73A	1.01885	2.81649	3.60647	0.00320384	0.011435	-2.67123		small nucleolar RNA, H/ACA box 73A [Source:HGNC Symbol;Acc:HGNC:10115]	1	28507366	28507571	1
ENSG00000200087	SNORA73B	0.166716	4.10964	0.865268	0.402615	0.541117	-7.03177		small nucleolar RNA, H/ACA box 73B [Source:HGNC Symbol;Acc:HGNC:10116]	1	28508559	28508762	1
ENSG00000252213	SNORA74	0.979272	0.970312	5.36303	0.000130167	0.000883354	0.603265		Small nucleolar RNA SNORA74 [Source:RFAM;Acc:RF00090]	5	139276180	139276320	1
ENSG00000200959	SNORA74A	0.474654	2.81884	1.94353	0.073977	0.142879	-5.73337	26821	small nucleolar RNA, H/ACA box 74A [Source:HGNC Symbol;Acc:HGNC:10119]	5	139278781	139278978	1
ENSG00000206885	SNORA75	-0.110508	1.56975	-0.486452	0.634765	0.748214	-7.41864	654321	small nucleolar RNA, H/ACA box 75 [Source:HGNC Symbol;Acc:HGNC:32661]	2	231455800	231455936	-1
ENSG00000221643	SNORA77	-0.873899	3.22118	-4.94356	0.000270439	0.00162987	-0.136979	677843	small nucleolar RNA, H/ACA box 77 [Source:HGNC Symbol;Acc:HGNC:32663]	1	203729581	203729705	1
ENSG00000264346	SNORA77	0.0934333	0.609457	0.420652	0.680896	0.783363	-7.42939		Small nucleolar RNA SNORA77 [Source:RFAM;Acc:RF00599]	22	20126402	20126526	1
ENSG00000222489	SNORA79	0.82163	3.10481	4.70258	0.000416011	0.00221604	-0.577356		Small nucleolar RNA SNORA79 [Source:RFAM;Acc:RF00600]	14	20323179	20323326	-1
ENSG00000221303	SNORA79	0.987329	1.64531	4.5757	0.000523434	0.00264063	-0.862367	677845	small nucleolar RNA, H/ACA box 79 [Source:HGNC Symbol;Acc:HGNC:32665]	14	81202695	81202834	-1
ENSG00000207496	SNORA7A	0.78996	3.85233	2.25137	0.0423473	0.0924994	-5.14642	619563	small nucleolar RNA, H/ACA box 7A [Source:HGNC Symbol;Acc:HGNC:32592]	3	12840312	12840450	-1
ENSG00000207088	SNORA7B	0.0886879	2.85596	0.545021	0.594989	0.715553	-7.35996	677797	small nucleolar RNA, H/ACA box 7B [Source:HGNC Symbol;Acc:HGNC:32593]	3	129397210	129397348	-1
ENSG00000207304	SNORA8	-0.151209	2.76687	-0.580558	0.57149	0.696301	-7.34672	654320	small nucleolar RNA, H/ACA box 8 [Source:HGNC Symbol;Acc:HGNC:32596]	11	93732361	93732499	-1
ENSG00000207475	SNORA80E	1.11348	-0.0907668	3.45422	0.00428759	0.0145484	-2.7916	677823	small nucleolar RNA, H/ACA box 80E [Source:HGNC Symbol;Acc:HGNC:32635]	1	155919909	155920045	-1
ENSG00000221420	SNORA81	-0.00897806	1.62348	-0.0510573	0.960058	0.976148	-7.54207	677847	small nucleolar RNA, H/ACA box 81 [Source:HGNC Symbol;Acc:HGNC:32667]	3	186786675	186786852	1
ENSG00000238917	SNORD10	-0.12242	6.29295	-0.534858	0.601799	0.721169	-7.06977		small nucleolar RNA, C/D box 10 [Source:HGNC Symbol;Acc:HGNC:32706]	17	7576811	7576952	1
ENSG00000221500	SNORD100	0.982611	5.96113	3.55632	0.00352614	0.0124066	-2.52823	594838	small nucleolar RNA, C/D box 100 [Source:HGNC Symbol;Acc:HGNC:32763]	6	132816802	132816877	1
ENSG00000206754	SNORD101	0.613503	8.22538	1.23054	0.240351	0.363018	-6.26836	594837	small nucleolar RNA, C/D box 101 [Source:HGNC Symbol;Acc:HGNC:32764]	6	132815307	132815379	1
ENSG00000207500	SNORD102	0.365076	7.51704	0.962595	0.353358	0.491447	-6.62199	26771	small nucleolar RNA, C/D box 102 [Source:HGNC Symbol;Acc:HGNC:10099]	13	27255064	27255135	1
ENSG00000199753	SNORD104	-0.135837	9.88318	-0.334296	0.743501	0.832088	-6.82846		small nucleolar RNA, C/D box 104 [Source:HGNC Symbol;Acc:HGNC:32768]	17	64146083	64146152	1
ENSG00000209645	SNORD105	1.17643	5.02687	4.18785	0.00106887	0.00460231	-1.39989	692229	small nucleolar RNA, C/D box 105 [Source:HGNC Symbol;Acc:HGNC:32769]	19	10107651	10107735	1
ENSG00000238531	SNORD105B	-0.248348	4.82546	-0.768622	0.455888	0.589987	-7.0532		small nucleolar RNA, C/D box 105B [Source:HGNC Symbol;Acc:HGNC:33572]	19	10109757	10109835	1
ENSG00000276314	SNORD107	-0.181118	5.63495	-0.730115	0.478303	0.61333	-7.00718	91380	small nucleolar RNA, C/D box 107 [Source:HGNC Symbol;Acc:HGNC:32771]	15	24981994	24982068	1
ENSG00000274640	SNORD109A	-0.397555	1.52892	-2.15296	0.0507314	0.106736	-5.41942	338428	small nucleolar RNA, C/D box 109A [Source:HGNC Symbol;Acc:HGNC:32773]	15	25041974	25042040	1
ENSG00000239169	SNORD109B	-0.397555	1.52892	-2.15296	0.0507314	0.106736	-5.41942	338429	small nucleolar RNA, C/D box 109B [Source:HGNC Symbol;Acc:HGNC:32774]	15	25278343	25278409	1
ENSG00000238317	SNORD11	0.169157	2.02664	0.593472	0.563074	0.689302	-7.3566	692058	small nucleolar RNA, C/D box 11 [Source:HGNC Symbol;Acc:HGNC:32707]	2	202293051	202293134	1
ENSG00000221116	SNORD110	0.186602	5.87013	0.447523	0.661882	0.769209	-7.1562	692213	small nucleolar RNA, C/D box 110 [Source:HGNC Symbol;Acc:HGNC:32775]	20	2654212	2654286	1
ENSG00000221066	SNORD111	0.475329	6.4051	1.51103	0.15476	0.257622	-6.08224	692214	small nucleolar RNA, C/D box 111 [Source:HGNC Symbol;Acc:HGNC:32776]	16	70538005	70538098	1
ENSG00000221514	SNORD111B	1.17692	5.93186	4.05777	0.00136297	0.00566454	-1.56901		small nucleolar RNA, C/D box 111B [Source:HGNC Symbol;Acc:HGNC:33579]	16	70529509	70529588	1
ENSG00000207063	SNORD116-1	-0.783429	2.70013	-1.26682	0.227498	0.348911	-6.71777	100033413	small nucleolar RNA, C/D box 116-1 [Source:HGNC Symbol;Acc:HGNC:33067]	15	25051477	25051571	1
ENSG00000206621	SNORD116-14	0.0187656	3.00644	0.0217949	0.982943	0.989185	-7.50951	100033426	small nucleolar RNA, C/D box 116-14 [Source:HGNC Symbol;Acc:HGNC:33080]	15	25080142	25080233	1
ENSG00000207174	SNORD116-15	-0.176801	2.86002	-0.186585	0.854873	0.913512	-7.5022	100033427	small nucleolar RNA, C/D box 116-15 [Source:HGNC Symbol;Acc:HGNC:33081]	15	25081287	25081378	1
ENSG00000207263	SNORD116-16	-0.0364212	3.09022	-0.0472169	0.96306	0.97622	-7.50336	100033428	small nucleolar RNA, C/D box 116-16 [Source:HGNC Symbol;Acc:HGNC:33082]	15	25082768	25082859	1
ENSG00000206656	SNORD116-17	-0.0504999	3.14994	-0.065887	0.948473	0.968243	-7.49791		small nucleolar RNA, C/D box 116-17 [Source:HGNC Symbol;Acc:HGNC:33083]	15	25083588	25083679	1
ENSG00000206688	SNORD116-18	-0.273512	0.686695	-1.41261	0.181318	0.291261	-6.54037	100033430	small nucleolar RNA, C/D box 116-18 [Source:HGNC Symbol;Acc:HGNC:33084]	15	25085385	25085476	1
ENSG00000207460	SNORD116-19	-0.0532104	3.15135	-0.0693952	0.945734	0.967609	-7.49756		small nucleolar RNA, C/D box 116-19 [Source:HGNC Symbol;Acc:HGNC:33085]	15	25086527	25086618	1
ENSG00000207001	SNORD116-2	-0.702638	2.04836	-1.22969	0.240658	0.363261	-6.76975	100033414	small nucleolar RNA, C/D box 116-2 [Source:HGNC Symbol;Acc:HGNC:33068]	15	25054210	25054304	1
ENSG00000278715	SNORD116-20	-0.032493	3.15496	-0.0417737	0.967315	0.978775	-7.49882		small nucleolar RNA, C/D box 116-20 [Source:HGNC Symbol;Acc:HGNC:33086]	15	25087662	25087753	1
ENSG00000277785	SNORD116-21	-0.129265	2.20146	-0.243204	0.811652	0.881782	-7.5087		small nucleolar RNA, C/D box 116-21 [Source:HGNC Symbol;Acc:HGNC:33087]	15	25088804	25088895	1
ENSG00000275127	SNORD116-22	-0.0341885	3.34688	-0.0426876	0.966601	0.978451	-7.48399	100033433	small nucleolar RNA, C/D box 116-22 [Source:HGNC Symbol;Acc:HGNC:33088]	15	25089923	25090014	1
ENSG00000207375	SNORD116-23	-0.484436	1.51427	-1.72119	0.108969	0.196733	-6.11514	100033434	small nucleolar RNA, C/D box 116-23 [Source:HGNC Symbol;Acc:HGNC:33089]	15	25091786	25091877	1
ENSG00000207279	SNORD116-24	-0.377557	2.30248	-0.790952	0.443198	0.579009	-7.21157	100033435	small nucleolar RNA, C/D box 116-24 [Source:HGNC Symbol;Acc:HGNC:33090]	15	25094037	25094128	1
ENSG00000252326	SNORD116-25	-0.0513961	2.0435	-0.0743614	0.941858	0.965238	-7.53875	100033436	small nucleolar RNA, C/D box 116-25 [Source:HGNC Symbol;Acc:HGNC:33091]	15	25097663	25097754	1
ENSG00000251815	SNORD116-26	-0.30057	1.97168	-0.354707	0.728511	0.818748	-7.4725	100033438	small nucleolar RNA, C/D box 116-26 [Source:HGNC Symbol;Acc:HGNC:33092]	15	25099499	25099594	1
ENSG00000251896	SNORD116-27	0.903593	1.20884	2.18708	0.0476622	0.101951	-5.34422	100033439	small nucleolar RNA, C/D box 116-27 [Source:HGNC Symbol;Acc:HGNC:33093]	15	25101575	25101666	1
ENSG00000207245	SNORD116-29	-0.458847	1.79908	-0.830065	0.421521	0.557749	-7.18029	100033821	small nucleolar RNA, C/D box 116-29 [Source:HGNC Symbol;Acc:HGNC:33348]	15	25106521	25106603	1
ENSG00000207014	SNORD116-3	-0.636758	2.86966	-0.88349	0.393056	0.53348	-7.115	100033415	small nucleolar RNA, C/D box 116-3 [Source:HGNC Symbol;Acc:HGNC:33069]	15	25056860	25056954	1
ENSG00000207191	SNORD116-5	-0.54934	2.49811	-0.584569	0.568869	0.693449	-7.35615	100033417	small nucleolar RNA, C/D box 116-5 [Source:HGNC Symbol;Acc:HGNC:33071]	15	25062333	25062427	1
ENSG00000207442	SNORD116-6	-0.558857	2.12197	-0.989442	0.34055	0.479831	-7.03146	100033418	small nucleolar RNA, C/D box 116-6 [Source:HGNC Symbol;Acc:HGNC:33072]	15	25065026	25065121	1
ENSG00000207133	SNORD116-7	-0.54934	2.49811	-0.584569	0.568869	0.693449	-7.35615	100033419	small nucleolar RNA, C/D box 116-7 [Source:HGNC Symbol;Acc:HGNC:33073]	15	25067788	25067882	1
ENSG00000207093	SNORD116-8	-0.166683	3.57389	-0.20307	0.842232	0.907047	-7.44478	100033420	small nucleolar RNA, C/D box 116-8 [Source:HGNC Symbol;Acc:HGNC:33074]	15	25070432	25070526	1
ENSG00000206727	SNORD116-9	-0.636758	2.86966	-0.88349	0.393056	0.53348	-7.115	100033421	small nucleolar RNA, C/D box 116-9 [Source:HGNC Symbol;Acc:HGNC:33075]	15	25073107	25073201	1
ENSG00000201785	SNORD117	1.06652	4.27536	2.45761	0.0288386	0.0685539	-4.74546	692233	small nucleolar RNA, C/D box 117 [Source:HGNC Symbol;Acc:HGNC:32742]	6	31536374	31536449	-1
ENSG00000200463	SNORD118	1.31977	4.02685	5.67976	7.62e-05	0.000568153	1.24085	727676	small nucleolar RNA, C/D box 118 [Source:HGNC Symbol;Acc:HGNC:32952]	17	8173454	8173587	-1
ENSG00000212304	SNORD12	-0.457614	5.50378	-0.799289	0.438518	0.574106	-6.96613	692057	small nucleolar RNA, C/D box 12 [Source:HGNC Symbol;Acc:HGNC:32708]	20	49280683	49280772	1
ENSG00000238886	SNORD121A	1.00401	1.11727	4.9185	0.000282726	0.00167869	-0.206098	100113379	small nucleolar RNA, C/D box 121A [Source:HGNC Symbol;Acc:HGNC:33560]	9	33952769	33952850	-1
ENSG00000238300	SNORD121B	1.076	3.81551	5.87274	5.53e-05	0.000439108	1.55601	101340252	small nucleolar RNA, C/D box 121B [Source:HGNC Symbol;Acc:HGNC:33569]	9	33934296	33934376	-1
ENSG00000239112	SNORD123	-2.563	3.09786	-10.4398	1.11e-07	2.64e-06	7.99439		small nucleolar RNA, C/D box 123 [Source:HGNC Symbol;Acc:HGNC:33562]	5	9548836	9548905	1
ENSG00000239127	SNORD125	-0.720897	0.945503	-3.24992	0.00634742	0.020183	-3.40278	100113380	small nucleolar RNA, C/D box 125 [Source:HGNC Symbol;Acc:HGNC:33564]	22	29333163	29333258	-1
ENSG00000238344	SNORD126	0.462146	4.26498	0.764136	0.458465	0.592393	-7.10212		small nucleolar RNA, C/D box 126 [Source:HGNC Symbol;Acc:HGNC:33565]	14	20326450	20326526	-1
ENSG00000239043	SNORD127	0.175602	5.94703	0.311386	0.760456	0.843551	-7.20334		small nucleolar RNA, C/D box 127 [Source:HGNC Symbol;Acc:HGNC:33555]	14	45110883	45110968	1
ENSG00000222365	SNORD12B	0.056819	6.62496	0.210398	0.836627	0.903761	-7.16416		small nucleolar RNA, C/D box 12B [Source:HGNC Symbol;Acc:HGNC:33573]	20	49280319	49280409	1
ENSG00000209042	SNORD12C	0.96773	7.71615	3.55875	0.00350979	0.0123666	-2.36782		small nucleolar RNA, C/D box 12C [Source:HGNC Symbol;Acc:HGNC:10105]	20	49278940	49279028	1
ENSG00000239039	SNORD13	-0.335131	6.64609	-1.14276	0.273798	0.400843	-6.52017	692084	small nucleolar RNA, C/D box 13 [Source:HGNC Symbol;Acc:HGNC:32711]	8	33513475	33513578	1
ENSG00000239128	SNORD13P3	-0.306055	2.55762	-1.61918	0.12946	0.225192	-6.25333		small nucleolar RNA, C/D box 13 pseudogene 3 [Source:HGNC Symbol;Acc:HGNC:10112]	3	47250523	47250626	-1
ENSG00000201403	SNORD14B	-0.610538	0.731038	-3.02322	0.00981526	0.0286703	-3.82907		small nucleolar RNA, C/D box 14B [Source:HGNC Symbol;Acc:HGNC:31803]	11	17075779	17075868	-1
ENSG00000202252	SNORD14C	-1.05298	4.57421	-3.90036	0.00183296	0.00717259	-1.9939	85389	small nucleolar RNA, C/D box 14C [Source:HGNC Symbol;Acc:HGNC:30352]	11	123059335	123059422	-1
ENSG00000207118	SNORD14D	-0.6736	4.19127	-2.73197	0.0171489	0.0444794	-4.25559	85390	small nucleolar RNA, C/D box 14D [Source:HGNC Symbol;Acc:HGNC:30353]	11	123058909	123058995	-1
ENSG00000200879	SNORD14E	-1.02269	1.04312	-3.25301	0.00630974	0.020089	-3.39631	85391	small nucleolar RNA, C/D box 14E [Source:HGNC Symbol;Acc:HGNC:30354]	11	123058077	123058161	-1
ENSG00000206941	SNORD15A	1.29943	9.51983	3.86642	0.00195444	0.0075643	-1.63743	6079	small nucleolar RNA, C/D box 15A [Source:HGNC Symbol;Acc:HGNC:10114]	11	75400391	75400538	1
ENSG00000207445	SNORD15B	0.43634	3.26536	2.30168	0.0385837	0.0860234	-5.10433	114599	small nucleolar RNA, C/D box 15B [Source:HGNC Symbol;Acc:HGNC:16649]	11	75404421	75404566	1
ENSG00000199673	SNORD16	1.02976	4.48144	4.71321	0.000408113	0.00219284	-0.460625		small nucleolar RNA, C/D box 16 [Source:HGNC Symbol;Acc:HGNC:32712]	15	66502812	66502910	-1
ENSG00000212232	SNORD17	1.12521	9.03984	3.35161	0.00522067	0.0171518	-2.6537	692086	small nucleolar RNA, C/D box 17 [Source:HGNC Symbol;Acc:HGNC:32713]	20	17962710	17962946	-1
ENSG00000200623	SNORD18A	0.199482	7.75597	0.254725	0.80293	0.874608	-7.04395	595098	small nucleolar RNA, C/D box 18A [Source:HGNC Symbol;Acc:HGNC:32714]	15	66503243	66503314	-1
ENSG00000202529	SNORD18B	1.55523	4.62101	6.73617	1.41e-05	0.000146022	3.0403	595099	small nucleolar RNA, C/D box 18B [Source:HGNC Symbol;Acc:HGNC:32715]	15	66502020	66502091	-1
ENSG00000199574	SNORD18C	1.21844	5.18367	4.76536	0.000371588	0.00205911	-0.30436	595100	small nucleolar RNA, C/D box 18C [Source:HGNC Symbol;Acc:HGNC:32716]	15	66501250	66501318	-1
ENSG00000222345	SNORD19	1.8855	6.96225	4.04934	0.00138469	0.00571647	-1.4902		Small nucleolar RNA SNORD19 [Source:RFAM;Acc:RF00569]	3	52691378	52691453	1
ENSG00000252787	SNORD19	1.42515	4.04297	3.2088	0.00686957	0.0214037	-3.35865		Small nucleolar RNA SNORD19 [Source:RFAM;Acc:RF00569]	3	52688890	52688962	1
ENSG00000238862	SNORD19B	1.90682	4.72987	4.8691	0.000308679	0.00180426	-0.143523		small nucleolar RNA, C/D box 19B [Source:HGNC Symbol;Acc:HGNC:33570]	3	52690744	52690827	1
ENSG00000280904	SNORD19B	1.42515	4.04297	3.2088	0.00686957	0.0214037	-3.35865		Small nucleolar RNA SNORD19B [Source:RFAM;Acc:RF01183]	3	52688882	52688961	1
ENSG00000278261	SNORD1A	1.74266	4.87002	5.93543	4.99e-05	0.000404922	1.74874		small nucleolar RNA, C/D box 1A [Source:HGNC Symbol;Acc:HGNC:32556]	17	76561634	76561705	1
ENSG00000199961	SNORD1B	1.24938	8.95536	4.15975	0.00112633	0.00476909	-1.12514	677849	small nucleolar RNA, C/D box 1B [Source:HGNC Symbol;Acc:HGNC:32676]	17	76561109	76561192	1
ENSG00000274091	SNORD1C	0.678629	3.97193	3.21956	0.00672887	0.0210432	-3.34886		small nucleolar RNA, C/D box 1C [Source:HGNC Symbol;Acc:HGNC:32677]	17	76558791	76558868	1
ENSG00000238942	SNORD2	1.28637	9.09068	2.51113	0.0260751	0.0628455	-4.21534		small nucleolar RNA, C/D box 2 [Source:HGNC Symbol;Acc:HGNC:32678]	3	186784796	186784864	1
ENSG00000207280	SNORD20	0.513846	5.99188	2.14404	0.0515633	0.107965	-5.1422	6082	small nucleolar RNA, C/D box 20 [Source:HGNC Symbol;Acc:HGNC:10143]	2	231456444	231456523	-1
ENSG00000206680	SNORD21	0.873402	8.21015	2.76143	0.0162113	0.0425825	-3.83487	6083	small nucleolar RNA, C/D box 21 [Source:HGNC Symbol;Acc:HGNC:10144]	1	92837289	92837383	1
ENSG00000277194	SNORD22	0.0650317	3.42192	0.339814	0.739438	0.829148	-7.41692	9304	small nucleolar RNA, C/D box 22 [Source:HGNC Symbol;Acc:HGNC:10145]	11	62852910	62853035	-1
ENSG00000206611	SNORD24	2.07462	5.34351	4.55393	0.00054458	0.00270325	-0.672684	26820	small nucleolar RNA, C/D box 24 [Source:HGNC Symbol;Acc:HGNC:10146]	9	133349396	133349470	1
ENSG00000275043	SNORD25	0.821278	7.72308	1.90997	0.0785043	0.149581	-5.36182	9303	small nucleolar RNA, C/D box 25 [Source:HGNC Symbol;Acc:HGNC:10147]	11	62855564	62855632	-1
ENSG00000276788	SNORD26	0.64876	9.46223	1.50465	0.156375	0.259961	-5.81027	9302	small nucleolar RNA, C/D box 26 [Source:HGNC Symbol;Acc:HGNC:10148]	11	62855292	62855366	-1
ENSG00000275996	SNORD27	0.335809	8.18788	1.19811	0.252313	0.375364	-6.31051	9301	small nucleolar RNA, C/D box 27 [Source:HGNC Symbol;Acc:HGNC:10149]	11	62855012	62855083	-1
ENSG00000274544	SNORD28	0.584169	5.14698	2.27494	0.0405427	0.0894929	-4.99606	9300	small nucleolar RNA, C/D box 28 [Source:HGNC Symbol;Acc:HGNC:10150]	11	62854621	62854695	-1
ENSG00000277846	SNORD30	1.10764	11.485	1.9245	0.0765144	0.146579	-5.02662	9299	small nucleolar RNA, C/D box 30 [Source:HGNC Symbol;Acc:HGNC:10157]	11	62853663	62853732	-1
ENSG00000201675	SNORD32A	-0.191079	2.49557	-0.647493	0.528609	0.658529	-7.31456	26819	small nucleolar RNA, C/D box 32A [Source:HGNC Symbol;Acc:HGNC:10159]	19	49489965	49490048	1
ENSG00000199631	SNORD33	0.0196656	6.00692	0.0765805	0.940126	0.964186	-7.24652	26818	small nucleolar RNA, C/D box 33 [Source:HGNC Symbol;Acc:HGNC:10160]	19	49490615	49490699	1
ENSG00000202503	SNORD34	1.32216	3.83546	3.04433	0.00942496	0.0276607	-3.68938	26817	small nucleolar RNA, C/D box 34 [Source:HGNC Symbol;Acc:HGNC:10161]	19	49490904	49490974	1
ENSG00000200259	SNORD35A	0.159717	0.352789	0.512466	0.616942	0.731879	-7.35213	26816	small nucleolar RNA, C/D box 35A [Source:HGNC Symbol;Acc:HGNC:10162]	19	49491175	49491260	1
ENSG00000200530	SNORD35B	0.460872	1.20905	0.822674	0.425563	0.561454	-7.18602		small nucleolar RNA, C/D box 35B [Source:HGNC Symbol;Acc:HGNC:17365]	19	49497720	49497806	1
ENSG00000199744	SNORD36A	-0.1442	3.00242	-0.654142	0.524452	0.656094	-7.28531	26815	small nucleolar RNA, C/D box 36A [Source:HGNC Symbol;Acc:HGNC:10163]	9	133350456	133350528	1
ENSG00000200831	SNORD36B	2.05361	6.69034	4.97262	0.000256883	0.00157111	0.206295		small nucleolar RNA, C/D box 36B [Source:HGNC Symbol;Acc:HGNC:10164]	9	133350095	133350168	1
ENSG00000252542	SNORD36C	0.501708	4.26627	0.658711	0.521606	0.654471	-7.17932	26813	small nucleolar RNA, C/D box 36C [Source:HGNC Symbol;Acc:HGNC:10165]	9	133350847	133350912	1
ENSG00000206775	SNORD37	0.260092	4.6241	0.980856	0.344609	0.484723	-6.88107	26812	small nucleolar RNA, C/D box 37 [Source:HGNC Symbol;Acc:HGNC:10166]	19	3982507	3982572	-1
ENSG00000202031	SNORD38A	1.02596	7.33277	3.27595	0.00603754	0.0194473	-2.94155	94162	small nucleolar RNA, C/D box 38A [Source:HGNC Symbol;Acc:HGNC:30355]	1	44777843	44777912	1
ENSG00000281859	SNORD38B	0.644904	6.10681	2.85753	0.0134892	0.036677	-3.84837	94163	small nucleolar RNA, C/D box 38B [Source:HGNC Symbol;Acc:HGNC:30356]	1	44778390	44778458	1
ENSG00000207421	SNORD38B	0.644904	6.10681	2.85753	0.0134892	0.036677	-3.84837		small nucleolar RNA, C/D box 38B [Source:HGNC Symbol;Acc:HGNC:30356]	1	44778390	44778456	1
ENSG00000263934	SNORD3A	0.592045	7.23269	2.15801	0.050266	0.106146	-5.00001	780851	small nucleolar RNA, C/D box 3A [Source:HGNC Symbol;Acc:HGNC:33189]	17	19188016	19188714	1
ENSG00000265185	SNORD3B-1	0.601426	6.92098	2.20271	0.0463145	0.0996497	-4.95293	26851	small nucleolar RNA, C/D box 3B-1 [Source:HGNC Symbol;Acc:HGNC:10168]	17	19061912	19062669	1
ENSG00000262074	SNORD3B-2	0.593139	6.90938	2.19033	0.0473785	0.101591	-4.97522	780852	small nucleolar RNA, C/D box 3B-2 [Source:HGNC Symbol;Acc:HGNC:33190]	17	19063346	19064136	-1
ENSG00000264940	SNORD3C	0.540202	7.15149	1.93286	0.0753894	0.144872	-5.37952	780853	small nucleolar RNA, C/D box 3C [Source:HGNC Symbol;Acc:HGNC:33191]	17	19189665	19190245	-1
ENSG00000277947	SNORD3D	-0.660008	4.67329	-3.18359	0.00721079	0.0222133	-3.36398		small nucleolar RNA, C/D box 3D [Source:HGNC Symbol;Acc:HGNC:33192]	17	19112419	19112636	-1
ENSG00000281000	SNORD3D	-0.659616	4.67307	-3.18183	0.00723523	0.0222353	-3.36736	780854	small nucleolar RNA, C/D box 3D [Source:HGNC Symbol;Acc:HGNC:33192]	17	19112420	19112636	-1
ENSG00000209702	SNORD41	-0.26398	4.62741	-0.867006	0.401697	0.540469	-6.98814	26810	small nucleolar RNA, C/D box 41 [Source:HGNC Symbol;Acc:HGNC:10179]	19	12706449	12706518	-1
ENSG00000238649	SNORD42A	-0.863222	2.91161	-1.61956	0.129378	0.225192	-6.2361	26809	small nucleolar RNA, C/D box 42A [Source:HGNC Symbol;Acc:HGNC:10180]	17	28723429	28723492	1
ENSG00000238423	SNORD42B	-0.016407	5.22637	-0.0411743	0.967784	0.978849	-7.32508	26808	small nucleolar RNA, C/D box 42B [Source:HGNC Symbol;Acc:HGNC:10181]	17	28720550	28720616	1
ENSG00000263764	SNORD43	0.736667	9.43448	1.84081	0.0886382	0.164832	-5.32061	26807	small nucleolar RNA, C/D box 43 [Source:HGNC Symbol;Acc:HGNC:10182]	22	39319050	39319113	-1
ENSG00000200706	SNORD45	0.261718	2.23769	0.781886	0.448323	0.582951	-7.21854		Small nucleolar RNA SNORD45 [Source:RFAM;Acc:RF00279]	6	38207274	38207345	1
ENSG00000200422	SNORD45	0.257449	2.23554	0.764975	0.457982	0.59224	-7.23205		Small nucleolar RNA SNORD45 [Source:RFAM;Acc:RF00279]	X	87146733	87146804	1
ENSG00000207241	SNORD45A	2.09452	8.10524	5.32024	0.000140093	0.000942624	0.93543	26805	small nucleolar RNA, C/D box 45A [Source:HGNC Symbol;Acc:HGNC:10184]	1	75787889	75787972	1
ENSG00000201487	SNORD45B	0.266415	2.54957	0.822937	0.425419	0.561454	-7.17418	26804	small nucleolar RNA, C/D box 45B [Source:HGNC Symbol;Acc:HGNC:10185]	1	75789477	75789548	1
ENSG00000206620	SNORD45C	2.40768	6.64134	6.27792	2.87e-05	0.000259855	2.45843	692085	small nucleolar RNA, C/D box 45C [Source:HGNC Symbol;Acc:HGNC:32720]	1	75787072	75787150	1
ENSG00000201009	SNORD46	0.634625	3.09645	3.16694	0.00744553	0.0227686	-3.51068		Small nucleolar RNA SNORD46 [Source:RFAM;Acc:RF00218]	7	132753023	132753126	1
ENSG00000200913	SNORD46	0.0946268	5.86783	0.135674	0.894162	0.936112	-7.25347	94161	small nucleolar RNA, C/D box 46 [Source:HGNC Symbol;Acc:HGNC:10186]	1	44776490	44776593	1
ENSG00000201823	SNORD48	0.811762	11.0005	1.99454	0.0675504	0.132901	-4.95176	26801	small nucleolar RNA, C/D box 48 [Source:HGNC Symbol;Acc:HGNC:10188]	6	31835263	31835326	1
ENSG00000277370	SNORD49A	-0.0227743	9.28152	-0.0251709	0.980302	0.987478	-6.93929	26800	small nucleolar RNA, C/D box 49A [Source:HGNC Symbol;Acc:HGNC:10189]	17	16440036	16440106	1
ENSG00000277108	SNORD49B	0.434326	6.14908	0.699494	0.496599	0.631132	-6.97658		small nucleolar RNA, C/D box 49B [Source:HGNC Symbol;Acc:HGNC:32721]	17	16439505	16439576	1
ENSG00000238578	SNORD4A	0.472968	2.64391	2.28559	0.0397515	0.0880721	-5.16504	26773	small nucleolar RNA, C/D box 4A [Source:HGNC Symbol;Acc:HGNC:10097]	17	28722582	28722653	1
ENSG00000238597	SNORD4B	1.73489	5.75355	4.05619	0.00136703	0.00567189	-1.58143	26772	small nucleolar RNA, C/D box 4B [Source:HGNC Symbol;Acc:HGNC:10098]	17	28723682	28723753	1
ENSG00000239195	SNORD5	0.840376	5.3477	2.07766	0.058171	0.118788	-5.31208	692072	small nucleolar RNA, C/D box 5 [Source:HGNC Symbol;Acc:HGNC:32702]	11	93733228	93733300	-1
ENSG00000275072	SNORD50B	1.39493	4.63801	4.82203	0.000335728	0.00191172	-0.243533		small nucleolar RNA, C/D box 50B [Source:HGNC Symbol;Acc:HGNC:32722]	6	85677589	85677658	-1
ENSG00000207047	SNORD51	1.2186	7.67326	4.46045	0.000645979	0.00310697	-0.661434		small nucleolar RNA, C/D box 51 [Source:HGNC Symbol;Acc:HGNC:10201]	2	206161878	206161957	1
ENSG00000201754	SNORD52	0.0727997	6.19048	0.245924	0.80959	0.880116	-7.19881	26797	small nucleolar RNA, C/D box 52 [Source:HGNC Symbol;Acc:HGNC:10202]	6	31837076	31837142	1
ENSG00000265145	SNORD53	2.30733	3.61215	6.98353	9.7e-06	0.000109727	3.37511	26796	small nucleolar RNA, C/D box 53 [Source:HGNC Symbol;Acc:HGNC:10203]	2	28927067	28927144	1
ENSG00000265706	SNORD53_SNORD92	1.7536	3.65605	4.39425	0.000729457	0.00347474	-1.11006		Small nucleolar RNA SNORD53/SNORD92 [Source:RFAM;Acc:RF00325]	2	28927983	28928060	1
ENSG00000238650	SNORD54	0.39064	2.97401	1.61383	0.130623	0.226102	-6.23232	26795	small nucleolar RNA, C/D box 54 [Source:HGNC Symbol;Acc:HGNC:10204]	8	56073835	56073901	-1
ENSG00000264294	SNORD55	-0.891991	6.00427	-3.13288	0.00794943	0.0241013	-3.34074	26811	small nucleolar RNA, C/D box 55 [Source:HGNC Symbol;Acc:HGNC:10205]	1	44775864	44775943	1
ENSG00000229686	SNORD56	-0.0364237	2.30399	-0.120974	0.905566	0.943456	-7.53118	26793	small nucleolar RNA, C/D box 56 [Source:HGNC Symbol;Acc:HGNC:10206]	20	2656624	2656694	1
ENSG00000226572	SNORD57	0.481904	9.04078	1.42238	0.178521	0.288042	-5.95706	26792	small nucleolar RNA, C/D box 57 [Source:HGNC Symbol;Acc:HGNC:10207]	20	2656939	2657010	1
ENSG00000206602	SNORD58A	0.0393898	7.00413	0.065614	0.948686	0.968243	-7.1483	26791	small nucleolar RNA, C/D box 58A [Source:HGNC Symbol;Acc:HGNC:10208]	18	49491283	49491347	-1
ENSG00000271982	SNORD58B	0.846618	6.65104	1.26429	0.228379	0.349368	-6.3754	26790	small nucleolar RNA, C/D box 58B [Source:HGNC Symbol;Acc:HGNC:10209]	18	49491664	49491729	-1
ENSG00000202093	SNORD58C	0.665136	7.68048	2.22158	0.0447367	0.096949	-4.85001		small nucleolar RNA, C/D box 58C [Source:HGNC Symbol;Acc:HGNC:33613]	18	49489245	49489308	-1
ENSG00000207031	SNORD59A	0.102313	4.28538	0.183938	0.856907	0.914108	-7.38987	26789	small nucleolar RNA, C/D box 59A [Source:HGNC Symbol;Acc:HGNC:10210]	12	56645027	56645101	-1
ENSG00000202314	SNORD6	1.85999	6.40373	3.98498	0.00156266	0.00635583	-1.66051	692075	small nucleolar RNA, C/D box 6 [Source:HGNC Symbol;Acc:HGNC:32703]	11	93731502	93731574	-1
ENSG00000206630	SNORD60	0.508809	7.58064	1.56717	0.141143	0.239624	-5.89178	26788	small nucleolar RNA, C/D box 60 [Source:HGNC Symbol;Acc:HGNC:10217]	16	2155023	2155105	-1
ENSG00000206979	SNORD61	1.28835	8.06956	2.03854	0.0624235	0.124898	-5.11968	26787	small nucleolar RNA, C/D box 61 [Source:HGNC Symbol;Acc:HGNC:10218]	X	136879199	136879271	-1
ENSG00000235284	SNORD62A	1.98575	5.42447	6.16087	3.46e-05	0.000305402	2.17269	26786	small nucleolar RNA, C/D box 62A [Source:HGNC Symbol;Acc:HGNC:10219]	9	131485665	131485750	1
ENSG00000231587	SNORD62B	1.98495	5.42479	6.17251	3.4e-05	0.000301904	2.19203	692093	small nucleolar RNA, C/D box 62B [Source:HGNC Symbol;Acc:HGNC:23031]	9	131490486	131490571	1
ENSG00000206989	SNORD63	0.43103	8.27728	1.40282	0.184155	0.294482	-6.05074	26785	small nucleolar RNA, C/D box 63 [Source:HGNC Symbol;Acc:HGNC:10220]	5	138561043	138561110	-1
ENSG00000276610	SNORD64	0.236427	6.11231	0.971963	0.34885	0.487918	-6.74987	347686	small nucleolar RNA, C/D box 64 [Source:HGNC Symbol;Acc:HGNC:32725]	15	24985100	24985166	1
ENSG00000277512	SNORD65	0.038358	4.06911	0.0708736	0.94458	0.966828	-7.42324	692106	small nucleolar RNA, C/D box 65 [Source:HGNC Symbol;Acc:HGNC:32726]	17	16441226	16441298	1
ENSG00000212158	SNORD66	-0.407002	5.8627	-1.73956	0.1056	0.191909	-5.80794	692107	small nucleolar RNA, C/D box 66 [Source:HGNC Symbol;Acc:HGNC:32727]	3	184325696	184325771	1
ENSG00000212135	SNORD67	-0.0626245	0.825973	-0.223125	0.826914	0.89444	-7.51469	692108	small nucleolar RNA, C/D box 67 [Source:HGNC Symbol;Acc:HGNC:32728]	11	46762389	46762499	-1
ENSG00000200084	SNORD68	-0.941356	6.32406	-2.10628	0.0552303	0.114386	-5.17578		small nucleolar RNA, C/D box 68 [Source:HGNC Symbol;Acc:HGNC:32729]	16	89561434	89561517	1
ENSG00000212452	SNORD69	1.5903	9.57629	3.66504	0.0028651	0.0103976	-2.01432	692109	small nucleolar RNA, C/D box 69 [Source:HGNC Symbol;Acc:HGNC:32730]	3	52692736	52692812	1
ENSG00000207297	SNORD7	0.213922	2.87688	1.20806	0.248595	0.372516	-6.77214	692076	small nucleolar RNA, C/D box 7 [Source:HGNC Symbol;Acc:HGNC:32704]	17	35573657	35573753	1
ENSG00000212309	SNORD70	1.24893	5.30574	4.71653	0.000405678	0.00218925	-0.384052		Small nucleolar RNA SNORD70 [Source:RFAM;Acc:RF00575]	2	202278108	202278192	1
[truncated: 479 more rows]

## Sheet: LncRNA
Small RNA-seq Data
	Symbol	logFC	AveExpr	t	P.Value	adj.P.Val	B	Entrez_ID	Description	Chromosome	Start	End	Strand
ENSG00000230530	LIMD1-AS1	0.790878	1.88093	4.30991	0.000852228	0.00393893	-1.36434		LIMD1 antisense RNA 1 [Source:HGNC Symbol;Acc:HGNC:44107]	3	45679043	45689134	-1
ENSG00000178977	LINC00324	0.0731494	4.85652	0.278256	0.785203	0.861359	-7.31796	284029	long intergenic non-protein coding RNA 324 [Source:HGNC Symbol;Acc:HGNC:26628]	17	8220642	8224043	-1
ENSG00000245526	LINC00461	5.05076	10.2783	10.9659	6.26e-08	1.74e-06	8.73019	407047 645323	long intergenic non-protein coding RNA 461 [Source:HGNC Symbol;Acc:HGNC:42810]	5	88507546	88691041	-1
ENSG00000253230	LINC00599	-2.57454	2.10376	-10.8468	7.12e-08	1.88e-06	8.42717	157627 406907	long intergenic non-protein coding RNA 599 [Source:HGNC Symbol;Acc:HGNC:27231]	8	9900064	9905366	-1
ENSG00000225163	LINC00618	0.0337314	1.14657	0.126453	0.901313	0.940661	-7.53948		long intergenic non-protein coding RNA 618 [Source:HGNC Symbol;Acc:HGNC:20110]	14	96943579	96945394	1
ENSG00000226067	LINC00623	0.621666	4.39605	2.15313	0.0507158	0.106736	-5.27125		long intergenic non-protein coding RNA 623 [Source:HGNC Symbol;Acc:HGNC:44252]	1	120913275	121009291	1
ENSG00000232677	LINC00665	-1.26433	0.820848	-4.77757	0.000363536	0.00203269	-0.478809	100506930	long intergenic non-protein coding RNA 665 [Source:HGNC Symbol;Acc:HGNC:44323]	19	36313067	36331718	-1
ENSG00000281852	LINC00891	-0.250195	0.613045	-1.27303	0.225355	0.34628	-6.71142		long intergenic non-protein coding RNA 891 [Source:HGNC Symbol;Acc:HGNC:48577]	X	71697196	71706455	1
ENSG00000188825	LINC00910	1.38578	1.37576	5.72205	7.1e-05	0.000537568	1.22137		long intergenic non-protein coding RNA 910 [Source:HGNC Symbol;Acc:HGNC:44361]	17	43369845	43389199	-1
ENSG00000212694	LINC01089	0.0908605	-0.0264688	0.383852	0.707308	0.804039	-7.34245	338799	long intergenic non-protein coding RNA 1089 [Source:HGNC Symbol;Acc:HGNC:27886]	12	121795267	121803906	-1
ENSG00000231817	LINC01198	6.18667	-1.36191	16.8554	3.37e-10	2.61e-08	13.5228		long intergenic non-protein coding RNA 1198 [Source:HGNC Symbol;Acc:HGNC:49598]	13	46455135	46486506	-1
ENSG00000234722	LINC01287	-0.0267348	2.28877	-0.118818	0.907241	0.943456	-7.53163	103724390	long intergenic non-protein coding RNA 1287 [Source:HGNC Symbol;Acc:HGNC:50351]	7	153399920	153413963	-1
ENSG00000259417	LINC01314	4.30021	2.55681	19.094	7.09e-11	7.31e-09	15.4633		long intergenic non-protein coding RNA 1314 [Source:HGNC Symbol;Acc:HGNC:50507]	15	80195484	80252213	-1
ENSG00000221949	LINC01465	-0.286402	2.86134	-1.65226	0.122474	0.215614	-6.19148		long intergenic non-protein coding RNA 1465 [Source:HGNC Symbol;Acc:HGNC:26364]	12	62601751	62603690	-1
ENSG00000272888	LINC01578	-0.576378	0.404697	-2.80718	0.0148539	0.0398626	-4.20995		long intergenic non-protein coding RNA 1578 [Source:HGNC Symbol;Acc:HGNC:48626]	15	92882707	92899701	1
ENSG00000225595	LINC01623	-0.324643	1.0894	-1.45486	0.169483	0.277102	-6.49835		long intergenic non-protein coding RNA 1623 [Source:HGNC Symbol;Acc:HGNC:52050]	6	28859625	28864630	-1

## Sheet: miRNAs
Small RNA-seq Data
	Symbol	logFC	AveExpr	t	P.Value	adj.P.Val	B	Entrez_ID	Description	Chromosome	Start	End	Strand
ENSG00000207994	MIR100	1.10348	12.0421	2.12576	0.05331	0.111152	-4.65884	406892	microRNA 100 [Source:HGNC Symbol;Acc:HGNC:31487]	11	122152229	122152308	-1
ENSG00000199135	MIR101-1	1.94665	9.91809	4.6364	0.000468842	0.00243464	-0.170855	406893	microRNA 101-1 [Source:HGNC Symbol;Acc:HGNC:31488]	1	65058434	65058508	-1
ENSG00000199065	MIR101-2	1.94219	9.9454	4.62282	0.000480525	0.00247971	-0.193968	406894	microRNA 101-2 [Source:HGNC Symbol;Acc:HGNC:31489]	9	4850297	4850375	1
ENSG00000199035	MIR103A1	0.531393	13.3211	0.96558	0.351917	0.490642	-6.14139	406895	microRNA 103a-1 [Source:HGNC Symbol;Acc:HGNC:31490]	5	168560896	168560973	-1
ENSG00000199024	MIR103A2	0.539214	13.3284	0.978889	0.345544	0.485215	-6.1281	406896	microRNA 103a-2 [Source:HGNC Symbol;Acc:HGNC:31491]	20	3917494	3917571	1
ENSG00000283612	MIR103B1	0.531312	13.321	0.965436	0.351986	0.490642	-6.14153	100302238	microRNA 103b-1 [Source:HGNC Symbol;Acc:HGNC:35384]	5	168560904	168560965	1
ENSG00000283320	MIR103B2	0.539214	13.3279	0.978884	0.345547	0.485215	-6.12814	100302282	microRNA 103b-2 [Source:HGNC Symbol;Acc:HGNC:35385]	20	3917502	3917563	-1
ENSG00000207957	MIR105-1	-4.56497	1.79977	-20.9711	2.18e-11	3.91e-09	16.6025	406897	microRNA 105-1 [Source:HGNC Symbol;Acc:HGNC:31492]	X	152392219	152392299	-1
ENSG00000207818	MIR105-2	-4.61682	1.7477	-20.6736	2.61e-11	3.91e-09	16.4237	406898	microRNA 105-2 [Source:HGNC Symbol;Acc:HGNC:31493]	X	152394412	152394492	-1
ENSG00000208036	MIR106B	0.58845	12.069	1.26886	0.226792	0.348057	-5.90634	406900	microRNA 106b [Source:HGNC Symbol;Acc:HGNC:31495]	7	100093993	100094074	-1
ENSG00000198997	MIR107	1.04811	9.26276	2.53597	0.0248808	0.0604464	-4.15759	406901	microRNA 107 [Source:HGNC Symbol;Acc:HGNC:31496]	10	89592747	89592827	-1
ENSG00000257178	MIR10A	-0.895022	16.8756	-1.40055	0.184819	0.294782	-5.42841	406902	microRNA 10a [Source:HGNC Symbol;Acc:HGNC:31497]	17	48579630	48582259	-1
ENSG00000207744	MIR10B	-2.87749	16.2577	-4.86206	0.000312577	0.00181324	0.500284	406903	microRNA 10b [Source:HGNC Symbol;Acc:HGNC:31498]	2	176150303	176150412	1
ENSG00000199017	MIR1-1	-2.20449	2.83293	-10.9667	6.25e-08	1.74e-06	8.58135	406904	microRNA 1-1 [Source:HGNC Symbol;Acc:HGNC:31499]	20	62554306	62554376	1
ENSG00000221540	MIR1180	-0.089723	8.16571	-0.280743	0.783336	0.861038	-6.99892	100302256	microRNA 1180 [Source:HGNC Symbol;Acc:HGNC:35261]	17	19344506	19344574	-1
ENSG00000207778	MIR122	-2.78432	1.66591	-12.4323	1.4e-08	5.7e-07	10.1107	100616357	microRNA 122 [Source:HGNC Symbol;Acc:HGNC:31501]	18	58451080	58451152	-1
ENSG00000267391	MIR122	-2.76594	1.67493	-12.2142	1.74e-08	6.93e-07	9.89053	406906	microRNA 122 [Source:HGNC Symbol;Acc:HGNC:31501]	18	58446275	58453766	1
ENSG00000221585	MIR1226	0.604031	6.03042	2.23892	0.0433306	0.0943926	-4.97566	100302232	microRNA 1226 [Source:HGNC Symbol;Acc:HGNC:33922]	3	47849555	47849629	1
ENSG00000221411	MIR1227	0.252402	3.08682	1.09201	0.2947	0.427384	-6.88935	100302283	microRNA 1227 [Source:HGNC Symbol;Acc:HGNC:33932]	19	2234062	2234149	-1
ENSG00000221394	MIR1229	0.754924	0.962085	3.89504	0.00185148	0.00722242	-2.13627	100302156	microRNA 1229 [Source:HGNC Symbol;Acc:HGNC:33924]	5	179798278	179798346	-1
ENSG00000207816	MIR124-2	-2.62814	2.18366	-11.537	3.43e-08	1.14e-06	9.18744	406908	microRNA 124-2 [Source:HGNC Symbol;Acc:HGNC:31503]	8	64379149	64379257	1
ENSG00000283193	MIR1243	0.681055	-0.217241	2.02961	0.0634343	0.126381	-5.4067	100302188	microRNA 1243 [Source:HGNC Symbol;Acc:HGNC:35304]	4	113106863	113106955	1
ENSG00000207598	MIR124-3	-2.65928	2.11438	-11.258	4.59e-08	1.42e-06	8.88503	406909	microRNA 124-3 [Source:HGNC Symbol;Acc:HGNC:31504]	20	63178500	63178586	1
ENSG00000283203	MIR1246	-1.47893	1.34399	-5.98524	4.6e-05	0.000383757	1.65629	100302142	microRNA 1246 [Source:HGNC Symbol;Acc:HGNC:35312]	2	176600980	176601052	-1
ENSG00000221598	MIR1249	-0.162805	2.80427	-0.69043	0.502095	0.635833	-7.27235	100302149	microRNA 1249 [Source:HGNC Symbol;Acc:HGNC:35315]	22	45200954	45201019	-1
ENSG00000221025	MIR1250	-1.77446	2.40296	-6.38407	2.43e-05	0.000228923	2.34028	100302229	microRNA 1250 [Source:HGNC Symbol;Acc:HGNC:35316]	17	81133196	81133308	-1
ENSG00000221479	MIR1251	-9.08534	0.300495	-14.0387	3.21e-09	1.66e-07	11.5031	100302289	microRNA 1251 [Source:HGNC Symbol;Acc:HGNC:35317]	12	97491909	97491978	1
ENSG00000221184	MIR1254-1	-0.480795	1.46365	-2.0718	0.0587897	0.11946	-5.55824	100302273	microRNA 1254-1 [Source:HGNC Symbol;Acc:HGNC:35319]	10	68759318	68759414	1
ENSG00000264574	MIR1254-2	-0.519341	1.46641	-2.24529	0.0428245	0.0934593	-5.26278	100616217	microRNA 1254-2 [Source:HGNC Symbol;Acc:HGNC:41770]	10	23393405	23393467	1
ENSG00000221265	MIR1255A	-1.33373	2.43119	-6.36491	2.51e-05	0.000234991	2.30444	100302193	microRNA 1255a [Source:HGNC Symbol;Acc:HGNC:35320]	4	101330302	101330414	-1
ENSG00000208008	MIR125A	-3.76061	8.43045	-8.90784	6.89e-07	1.15e-05	6.36809	406910	microRNA 125a [Source:HGNC Symbol;Acc:HGNC:31505]	19	51693254	51693339	1
ENSG00000207971	MIR125B1	-1.78548	8.55319	-4.53985	0.000558731	0.00274795	-0.447585	406911	microRNA 125b-1 [Source:HGNC Symbol;Acc:HGNC:31506]	11	122099757	122099844	-1
ENSG00000207863	MIR125B2	-1.17344	9.16079	-2.93806	0.0115592	0.0323893	-3.42838	406912	microRNA 125b-2 [Source:HGNC Symbol;Acc:HGNC:31507]	21	16590237	16590325	1
ENSG00000199161	MIR126	0.182834	6.17024	0.587836	0.566738	0.691873	-7.0501	406913	microRNA 126 [Source:HGNC Symbol;Acc:HGNC:31508]	9	136670602	136670686	1
ENSG00000266192	MIR1260B	0.906278	1.51018	4.67597	0.000436471	0.0023052	-0.673232	100422991	microRNA 1260b [Source:HGNC Symbol;Acc:HGNC:38258]	11	96341438	96341526	1
ENSG00000221203	MIR1262	-0.375008	3.28655	-1.74316	0.10495	0.190868	-6.02558	100302279	microRNA 1262 [Source:HGNC Symbol;Acc:HGNC:35328]	1	68183518	68183610	-1
ENSG00000221563	MIR1269A	0.369524	10.0144	0.932122	0.368304	0.507673	-6.42795	100302177	microRNA 1269a [Source:HGNC Symbol;Acc:HGNC:35337]	4	66276824	66276928	1
ENSG00000207608	MIR127	-4.0573	-0.39279	-9.8891	2.09e-07	4.21e-06	7.5681	406914	microRNA 127 [Source:HGNC Symbol;Acc:HGNC:31509]	14	100882979	100883075	1
ENSG00000238517	MIR1270	-0.358024	1.82174	-1.41943	0.179361	0.288526	-6.53508	100302179	microRNA 1270 [Source:HGNC Symbol;Acc:HGNC:35338]	19	20399272	20399354	-1
ENSG00000221464	MIR1271	-1.04519	5.78478	-2.90198	0.0123875	0.034399	-3.79838	100302203	microRNA 1271 [Source:HGNC Symbol;Acc:HGNC:35252]	5	176367946	176368031	1
ENSG00000221033	MIR1272	0.0239752	0.429467	0.126577	0.901217	0.940661	-7.49896	100302184	microRNA 1272 [Source:HGNC Symbol;Acc:HGNC:35339]	15	64762387	64762515	-1
ENSG00000221634	MIR1276	-1.4777	3.12142	-5.41846	0.000118391	0.000816867	0.715663	100302121	microRNA 1276 [Source:HGNC Symbol;Acc:HGNC:35347]	15	85770496	85770578	-1
ENSG00000221680	MIR1278	-1.21862	2.76322	-4.87147	0.000307382	0.00180426	-0.293243	100302163	microRNA 1278 [Source:HGNC Symbol;Acc:HGNC:35356]	1	193136503	193136583	1
ENSG00000207654	MIR128-1	-0.85771	10.6716	-2.16379	0.0497371	0.105298	-4.69886	406915	microRNA 128-1 [Source:HGNC Symbol;Acc:HGNC:31510]	2	135665397	135665478	1
ENSG00000207625	MIR128-2	-0.809299	10.3598	-2.0946	0.0564135	0.115964	-4.83878	406916	microRNA 128-2 [Source:HGNC Symbol;Acc:HGNC:31511]	3	35744476	35744559	1
ENSG00000221039	MIR1286	-0.322898	1.12105	-1.14659	0.272267	0.399529	-6.87902	100302118	microRNA 1286 [Source:HGNC Symbol;Acc:HGNC:35279]	22	20249134	20249211	-1
ENSG00000281842	MIR1291	0.49041	3.96045	0.415372	0.68466	0.786962	-7.34196	100302221	microRNA 1291 [Source:HGNC Symbol;Acc:HGNC:35284]	12	48654444	48654530	-1
ENSG00000207705	MIR129-1	-1.42509	6.1567	-5.16711	0.000182616	0.0011749	0.501959	406917	microRNA 129-1 [Source:HGNC Symbol;Acc:HGNC:31512]	7	128207872	128207943	1
ENSG00000199077	MIR129-2	-1.28633	6.3376	-4.5795	0.000519833	0.00262781	-0.556031	406918	microRNA 129-2 [Source:HGNC Symbol;Acc:HGNC:31513]	11	43581394	43581483	1
ENSG00000221604	MIR1293	-6.19799	-0.753701	-11.6437	3.07e-08	1.1e-06	9.42223	100302220	microRNA 1293 [Source:HGNC Symbol;Acc:HGNC:35286]	12	50234142	50234212	-1
ENSG00000221430	MIR1294	0.299512	2.21562	1.3905	0.187779	0.298502	-6.57202	100302181	microRNA 1294 [Source:HGNC Symbol;Acc:HGNC:35287]	5	154347106	154347247	1
ENSG00000221390	MIR1295A	-0.282129	1.05338	-1.15995	0.266979	0.393167	-6.86306	100302178	microRNA 1295a [Source:HGNC Symbol;Acc:HGNC:35288]	1	171101728	171101806	-1
ENSG00000283598	MIR1295B	-0.282129	1.05338	-1.15995	0.266979	0.393167	-6.86306	100847009	microRNA 1295b [Source:HGNC Symbol;Acc:HGNC:43524]	1	171101739	171101798	1
ENSG00000221063	MIR1296	-0.1857	6.95478	-0.454579	0.656928	0.765026	-7.04598	100302150	microRNA 1296 [Source:HGNC Symbol;Acc:HGNC:35249]	10	63372957	63373048	-1
ENSG00000221710	MIR1298	-3.23298	0.373186	-7.537	4.33e-06	5.83e-05	4.33323	100302153	microRNA 1298 [Source:HGNC Symbol;Acc:HGNC:35258]	X	114715233	114715344	1
ENSG00000221445	MIR1301	-0.949503	5.54264	-3.52598	0.00373691	0.0129459	-2.63089	100302246	microRNA 1301 [Source:HGNC Symbol;Acc:HGNC:35253]	2	25328640	25328721	-1
ENSG00000221552	MIR1303	1.62385	1.28991	6.08446	3.92e-05	0.00033579	1.85319	100302284	microRNA 1303 [Source:HGNC Symbol;Acc:HGNC:35301]	5	154685776	154685861	1
ENSG00000221227	MIR1305	-0.607434	0.56719	-2.72505	0.0173769	0.0449766	-4.37916	100302270	microRNA 1305 [Source:HGNC Symbol;Acc:HGNC:35303]	4	182169293	182169378	1
ENSG00000208009	MIR130A	0.710724	8.53473	2.0299	0.063401	0.126381	-5.09558	406919	microRNA 130a [Source:HGNC Symbol;Acc:HGNC:31514]	11	57641198	57641286	1
ENSG00000207751	MIR130B	-0.1371	10.0254	-0.344068	0.73631	0.826015	-6.81297	406920	microRNA 130b [Source:HGNC Symbol;Acc:HGNC:31515]	22	21652270	21670237	1
ENSG00000267200	MIR132	-3.23747	7.19118	-10.7734	7.71e-08	2.01e-06	8.53689	406921	microRNA 132 [Source:HGNC Symbol;Acc:HGNC:31516]	17	2049908	2050008	-1
ENSG00000265142	MIR133A1HG	-2.33424	3.02705	-11.4444	3.78e-08	1.2e-06	9.11051	406905 406922 102723167	MIR133A1 host gene [Source:HGNC Symbol;Acc:HGNC:49594]	18	21825487	21831410	-1
ENSG00000251862	MIR1343	-0.234266	2.97484	-1.17323	0.261803	0.386694	-6.81149	100616437	microRNA 1343 [Source:HGNC Symbol;Acc:HGNC:41902]	11	34941837	34941920	1
ENSG00000207926	MIR135A1	-1.98632	5.47538	-7.74344	3.24e-06	4.51e-05	4.62179	406925	microRNA 135a-1 [Source:HGNC Symbol;Acc:HGNC:31520]	3	52294219	52294308	-1
ENSG00000207586	MIR135A2	-5.42219	4.39027	-19.1129	7e-11	7.31e-09	15.4387	406926	microRNA 135a-2 [Source:HGNC Symbol;Acc:HGNC:31521]	12	97563812	97563911	1
ENSG00000199059	MIR135B	-8.36217	4.00837	-20.7245	2.53e-11	3.91e-09	16.3159	442891	microRNA 135b [Source:HGNC Symbol;Acc:HGNC:31760]	1	205448302	205448398	-1
ENSG00000225206	MIR137HG	-3.33995	0.0713893	-11.2435	4.66e-08	1.42e-06	9.02741	400765 406928 100616452	MIR137 host gene [Source:HGNC Symbol;Acc:HGNC:42871]	1	97986740	98049863	-1
ENSG00000207954	MIR138-1	2.78199	2.00392	10.0443	1.75e-07	3.68e-06	7.5232	406929	microRNA 138-1 [Source:HGNC Symbol;Acc:HGNC:31524]	3	44114212	44114310	1
ENSG00000207649	MIR138-2	1.95046	0.920657	7.48776	4.65e-06	6.09e-05	4.13834	406930	microRNA 138-2 [Source:HGNC Symbol;Acc:HGNC:31525]	16	56858518	56858601	1
ENSG00000272036	MIR139	-2.82466	2.44063	-10.0473	1.74e-07	3.68e-06	7.51004	406931	microRNA 139 [Source:HGNC Symbol;Acc:HGNC:31526]	11	72615063	72615130	-1
ENSG00000208017	MIR140	1.16918	11.3651	2.24092	0.0431711	0.0941327	-4.51316	406932	microRNA 140 [Source:HGNC Symbol;Acc:HGNC:31527]	16	69933081	69933180	1
ENSG00000276365	MIR145	-3.11602	4.37604	-9.37273	3.87e-07	7.21e-06	6.76313	406937	microRNA 145 [Source:HGNC Symbol;Acc:HGNC:31532]	5	149430646	149430733	1
ENSG00000222532	MIR1468	-0.728789	3.28445	-3.55335	0.00354621	0.0124595	-2.76351	100302115	microRNA 1468 [Source:HGNC Symbol;Acc:HGNC:35250]	X	63786002	63786087	-1
ENSG00000202569	MIR146B	-3.09551	11.6216	-7.19658	7.08e-06	8.47e-05	4.11958	574447	microRNA 146b [Source:HGNC Symbol;Acc:HGNC:32079]	10	102436512	102436584	1
ENSG00000199085	MIR148A	1.92249	16.0901	3.20813	0.00687841	0.0214043	-2.49413	406940	microRNA 148a [Source:HGNC Symbol;Acc:HGNC:31535]	7	25949919	25949986	-1
ENSG00000199122	MIR148B	0.728873	13.0037	1.14564	0.272647	0.399849	-5.97884	442892	microRNA 148b [Source:HGNC Symbol;Acc:HGNC:31761]	12	54337216	54337314	1
ENSG00000207611	MIR149	-0.927412	8.76027	-2.63119	0.0207753	0.0525106	-4.02979	406941	microRNA 149 [Source:HGNC Symbol;Acc:HGNC:31536]	2	240456001	240456089	1
ENSG00000254324	MIR151A	0.238357	13.0077	0.50516	0.621922	0.737082	-6.50729	442893	microRNA 151a [Source:HGNC Symbol;Acc:HGNC:31762]	8	140732564	140732653	-1
ENSG00000265154	MIR151B	1.61289	3.45212	4.53946	0.000559131	0.00274795	-0.850608	100616247	microRNA 151b [Source:HGNC Symbol;Acc:HGNC:41588]	14	100109419	100109514	-1
ENSG00000207947	MIR152	-0.545327	9.7951	-1.29248	0.218746	0.338013	-6.05816	406943	microRNA 152 [Source:HGNC Symbol;Acc:HGNC:31538]	17	48037161	48037247	-1
ENSG00000234883	MIR155HG	-4.67251	2.47933	-21.4728	1.61e-11	3.91e-09	16.9045	114614 406947	MIR155 host gene [Source:HGNC Symbol;Acc:HGNC:35460]	21	25561909	25575168	1
ENSG00000207779	MIR15B	0.942621	9.16465	2.53242	0.0250483	0.060709	-4.17241	406949	microRNA 15b [Source:HGNC Symbol;Acc:HGNC:31544]	3	160404588	160404685	1
ENSG00000208006	MIR16-1	1.69837	9.40068	4.08637	0.00129184	0.00539611	-1.22877	406950	microRNA 16-1 [Source:HGNC Symbol;Acc:HGNC:31545]	13	50048973	50049061	-1
ENSG00000198987	MIR16-2	1.30197	9.66753	3.50579	0.00388417	0.0133812	-2.31161	406951	microRNA 16-2 [Source:HGNC Symbol;Acc:HGNC:31546]	3	160404745	160404825	1
ENSG00000215417	MIR17HG	0.3796	15.2155	0.642937	0.531469	0.661184	-6.26988	406952 406953 406979 406980 406982 407048 407975	miR-17-92a-1 cluster host gene [Source:HGNC Symbol;Acc:HGNC:23564]	13	91347820	91354579	1
ENSG00000207759	MIR181A1	1.00541	10.7555	2.22529	0.044432	0.096373	-4.58582	406995	microRNA 181a-1 [Source:HGNC Symbol;Acc:HGNC:31590]	1	198859044	198859153	-1
ENSG00000207595	MIR181A2	0.591918	10.7525	1.40668	0.183033	0.29335	-5.83542	406954	microRNA 181a-2 [Source:HGNC Symbol;Acc:HGNC:31549]	9	124692442	124692551	1
ENSG00000207975	MIR181B1	0.777044	9.6233	2.12404	0.0534768	0.111399	-4.84691	406955	microRNA 181b-1 [Source:HGNC Symbol;Acc:HGNC:31550]	1	198858873	198858982	-1
ENSG00000207737	MIR181B2	0.704118	9.8434	1.86788	0.0845384	0.158878	-5.24466	406956	microRNA 181b-2 [Source:HGNC Symbol;Acc:HGNC:31551]	9	124693710	124693798	1
ENSG00000207613	MIR181C	-0.865263	2.47926	-3.41807	0.0045954	0.0154956	-3.06696	406957	microRNA 181c [Source:HGNC Symbol;Acc:HGNC:31552]	19	13874699	13874808	1
ENSG00000207585	MIR181D	-0.970734	4.25834	-4.19598	0.0010528	0.00454967	-1.45422	574457	microRNA 181d [Source:HGNC Symbol;Acc:HGNC:32089]	19	13874875	13875011	1
ENSG00000207990	MIR182	-3.07477	4.74927	-10.1743	1.5e-07	3.28e-06	7.76046	406958	microRNA 182 [Source:HGNC Symbol;Acc:HGNC:31553]	7	129770383	129770492	-1
ENSG00000207691	MIR183	-3.18058	4.00851	-12.4753	1.35e-08	5.56e-07	10.2087	406959	microRNA 183 [Source:HGNC Symbol;Acc:HGNC:31554]	7	129774905	129775014	-1
ENSG00000207695	MIR184	-3.43151	-1.08412	-9.30975	4.18e-07	7.67e-06	6.89412	406960	microRNA 184 [Source:HGNC Symbol;Acc:HGNC:31555]	15	79209788	79209871	1
ENSG00000208023	MIR185	0.192331	8.18271	0.53313	0.602961	0.721707	-6.8885	406961	microRNA 185 [Source:HGNC Symbol;Acc:HGNC:31556]	22	20033139	20033220	1
ENSG00000207721	MIR186	0.421659	8.81526	1.20533	0.249609	0.373567	-6.24531	406962	microRNA 186 [Source:HGNC Symbol;Acc:HGNC:31557]	1	71067631	71067716	-1
ENSG00000207797	MIR187	-1.24967	1.14877	-5.88489	5.42e-05	0.000431818	1.48443	406963	microRNA 187 [Source:HGNC Symbol;Acc:HGNC:31558]	18	35904818	35904926	-1
ENSG00000207768	MIR188	1.92362	3.79538	8.36832	1.39e-06	2.12e-05	5.40441	406964	microRNA 188 [Source:HGNC Symbol;Acc:HGNC:31559]	X	50003503	50003588	1
ENSG00000211137	MIR190A	0.934564	4.31403	3.63894	0.00301132	0.0108416	-2.51344	406965	microRNA 190a [Source:HGNC Symbol;Acc:HGNC:31560]	15	62823957	62824041	1
ENSG00000215938	MIR190B	-0.028277	1.3279	-0.0995274	0.922242	0.953022	-7.54252	100126346	microRNA 190b [Source:HGNC Symbol;Acc:HGNC:33656]	1	154193665	154193743	-1
ENSG00000207605	MIR191	-0.246981	11.2696	-0.539441	0.598723	0.718569	-6.62164	406966	microRNA 191 [Source:HGNC Symbol;Acc:HGNC:31561]	3	49020618	49020709	-1
ENSG00000283416	MIR1910	3.34631	-1.57411	7.14203	7.67e-06	8.92e-05	3.99975	100302261	microRNA 1910 [Source:HGNC Symbol;Acc:HGNC:35394]	16	85741621	85741700	-1
ENSG00000207614	MIR193A	-2.27594	-0.141053	-9.16571	4.99e-07	8.65e-06	6.57531	406968	microRNA 193a [Source:HGNC Symbol;Acc:HGNC:31563]	17	31559996	31560083	1
ENSG00000207639	MIR193B	2.01713	3.40341	4.86427	0.000311351	0.00181037	-0.241727	574455	microRNA 193b [Source:HGNC Symbol;Acc:HGNC:32087]	16	14303967	14304049	1
ENSG00000207624	MIR194-1	0.334648	4.04588	1.54038	0.147508	0.247378	-6.25816	406969	microRNA 194-1 [Source:HGNC Symbol;Acc:HGNC:31564]	1	220118157	220118241	-1
ENSG00000229719	MIR194-2HG	0.01152	10.0337	0.0310974	0.975665	0.983607	-6.87441	406967 406970	MIR194-2 host gene [Source:HGNC Symbol;Acc:HGNC:51946]	11	64889560	64893449	-1
ENSG00000210741	MIR196A1	-2.67093	8.73715	-7.76589	3.14e-06	4.42e-05	4.84378	406972	microRNA 196a-1 [Source:HGNC Symbol;Acc:HGNC:31567]	17	48632490	48632559	-1
ENSG00000207924	MIR196A2	-2.69285	8.86223	-7.80853	2.96e-06	4.19e-05	4.90904	406973	microRNA 196a-2 [Source:HGNC Symbol;Acc:HGNC:31568]	12	53991738	53991847	1
ENSG00000238705	MIR1976	-0.00294285	2.21217	-0.0122924	0.990379	0.994221	-7.54015	100302190	microRNA 1976 [Source:HGNC Symbol;Acc:HGNC:37064]	1	26554542	26554593	1
ENSG00000207752	MIR199A1	-0.365359	9.6981	-1.03093	0.321421	0.457563	-6.35918	406976	microRNA 199a-1 [Source:HGNC Symbol;Acc:HGNC:31571]	19	10817426	10817496	-1
ENSG00000208024	MIR199A2	-0.365629	9.69648	-1.03191	0.320975	0.457191	-6.35832	406977	microRNA 199a-2 [Source:HGNC Symbol;Acc:HGNC:31572]	1	172144535	172144644	-1
ENSG00000207581	MIR199B	1.57373	13.3519	3.02553	0.00977172	0.0285768	-2.96864	406978	microRNA 199b [Source:HGNC Symbol;Acc:HGNC:31573]	9	128244721	128244830	-1
ENSG00000207607	MIR200A	0.871495	1.47432	4.217	0.00101243	0.00440737	-1.53679	406983	microRNA 200a [Source:HGNC Symbol;Acc:HGNC:31578]	1	1167863	1167952	1
ENSG00000207730	MIR200B	0.635113	3.54674	3.066	0.00904037	0.0267859	-3.67492	406984	microRNA 200b [Source:HGNC Symbol;Acc:HGNC:31579]	1	1167104	1167198	1
ENSG00000207713	MIR200C	0.133961	3.24757	0.552536	0.589979	0.712297	-7.32966	406985	microRNA 200c [Source:HGNC Symbol;Acc:HGNC:31580]	12	6963699	6963766	1
ENSG00000207935	MIR204	-3.33963	1.83521	-10.6693	8.64e-08	2.21e-06	8.23974	406987	microRNA 204 [Source:HGNC Symbol;Acc:HGNC:31582]	9	70809975	70810084	-1
ENSG00000230937	MIR205HG	-7.51449	-1.19311	-17.7661	1.75e-10	1.6e-08	14.0797	406988	MIR205 host gene [Source:HGNC Symbol;Acc:HGNC:43562]	1	209428820	209432838	1
ENSG00000199038	MIR210	0.755766	7.0136	2.63675	0.0205572	0.0520123	-4.17228	406992	microRNA 210 [Source:HGNC Symbol;Acc:HGNC:31587]	11	568089	568198	-1
ENSG00000252466	MIR2115	0.372867	0.713546	2.09203	0.0566764	0.116407	-5.4988	100313840	microRNA 2115 [Source:HGNC Symbol;Acc:HGNC:37309]	3	48316360	48316459	-1
ENSG00000267195	MIR212	-5.32024	4.65804	-22.5768	8.56e-12	3.51e-09	17.3898	406994	microRNA 212 [Source:HGNC Symbol;Acc:HGNC:31589]	17	2050271	2050380	-1
ENSG00000207590	MIR215	0.452795	3.41551	2.16104	0.0499882	0.105739	-5.33686	406997	microRNA 215 [Source:HGNC Symbol;Acc:HGNC:31592]	1	220117853	220117962	-1
ENSG00000207798	MIR216A	-10.3594	-0.217649	-21.3751	1.71e-11	3.91e-09	15.8817	406998	microRNA 216a [Source:HGNC Symbol;Acc:HGNC:31593]	2	55988950	55989059	-1
ENSG00000211520	MIR216B	-10.4373	0.827882	-22.1579	1.09e-11	3.51e-09	16.1628	100126319	microRNA 216b [Source:HGNC Symbol;Acc:HGNC:33668]	2	56000714	56000795	-1
ENSG00000207548	MIR217	-9.98011	2.68952	-28.4716	4.47e-13	1.11e-09	18.7082	406999	microRNA 217 [Source:HGNC Symbol;Acc:HGNC:31594]	2	55982967	55983076	-1
ENSG00000207732	MIR218-1	-2.70248	9.26058	-7.45434	4.87e-06	6.27e-05	4.4199	407000	microRNA 218-1 [Source:HGNC Symbol;Acc:HGNC:31595]	4	20528275	20528384	1
ENSG00000207739	MIR218-2	-2.7204	9.14844	-7.60595	3.93e-06	5.35e-05	4.63348	407001	microRNA 218-2 [Source:HGNC Symbol;Acc:HGNC:31596]	5	168768146	168768255	-1
ENSG00000199036	MIR219A1	-5.46506	4.52577	-22.6739	8.11e-12	3.51e-09	17.4425	407002	microRNA 219a-1 [Source:HGNC Symbol;Acc:HGNC:31597]	6	33207835	33207944	1
ENSG00000207955	MIR219A2	-6.22449	7.70532	-17.2667	2.49e-10	2.13e-08	14.0258	407003	microRNA 219a-2 [Source:HGNC Symbol;Acc:HGNC:31598]	9	128392007	128393510	-1
ENSG00000283335	MIR219B	-6.22533	7.70459	-17.2795	2.47e-10	2.13e-08	14.0342	100616335	microRNA 219b [Source:HGNC Symbol;Acc:HGNC:41823]	9	128392621	128392708	1
ENSG00000207870	MIR221	-1.06438	10.8645	-2.31578	0.0375872	0.0841044	-4.42402	407006	microRNA 221 [Source:HGNC Symbol;Acc:HGNC:31601]	X	45746157	45746266	-1
ENSG00000207725	MIR222	-1.41706	10.5239	-3.10529	0.00838267	0.0251075	-3.00966	407007	microRNA 222 [Source:HGNC Symbol;Acc:HGNC:31602]	X	45747015	45747124	-1
ENSG00000274536	MIR223	0.313272	1.76993	1.35042	0.199978	0.314305	-6.62835	407008	microRNA 223 [Source:HGNC Symbol;Acc:HGNC:31603]	X	66015461	66020422	1
ENSG00000252695	MIR2276	-0.64114	1.8412	-2.96738	0.0109265	0.0311807	-3.93422	100313842	microRNA 2276 [Source:HGNC Symbol;Acc:HGNC:37313]	13	24162416	24162504	1
ENSG00000252153	MIR2278	0.638291	1.16109	3.23282	0.00655953	0.0206454	-3.42298	100313780	microRNA 2278 [Source:HGNC Symbol;Acc:HGNC:37315]	9	94809962	94810057	1
ENSG00000186594	MIR22HG	-0.76336	7.42491	-2.15152	0.0508646	0.106863	-4.99489	84981 407004	MIR22 host gene [Source:HGNC Symbol;Acc:HGNC:28219]	17	1711493	1717174	-1
ENSG00000253008	MIR2355	1.03502	2.317	4.71947	0.000403539	0.00218246	-0.579053	100423036	microRNA 2355 [Source:HGNC Symbol;Acc:HGNC:38328]	2	207109987	207110073	-1
ENSG00000207980	MIR23A	0.318856	8.532	0.816188	0.429131	0.565403	-6.65933	407010	microRNA 23a [Source:HGNC Symbol;Acc:HGNC:31605]	19	13836587	13836659	-1
ENSG00000207563	MIR23B	1.93165	9.80583	4.6665	0.000444	0.00233501	-0.123192	407011	microRNA 23b [Source:HGNC Symbol;Acc:HGNC:31606]	9	95085208	95085304	1
ENSG00000267519	MIR24-2	0.0941223	8.47621	0.275686	0.787133	0.861679	-6.97145	284454 407013	microRNA 24-2 [Source:HGNC Symbol;Acc:HGNC:31608]	19	13834516	13836359	-1
ENSG00000264292	MIR2467	0.685366	0.406712	3.07891	0.00881881	0.0262235	-3.64853	100616360	microRNA 2467 [Source:HGNC Symbol;Acc:HGNC:41881]	2	239351724	239351804	-1
ENSG00000207547	MIR25	-0.194279	13.4322	-0.365049	0.72096	0.812474	-6.54024	407014	microRNA 25 [Source:HGNC Symbol;Acc:HGNC:31609]	7	100093560	100093643	-1
ENSG00000199075	MIR26A1	0.0610135	13.5212	0.122261	0.904566	0.943018	-6.59575	407015	microRNA 26a-1 [Source:HGNC Symbol;Acc:HGNC:31610]	3	37969404	37969480	1
ENSG00000207789	MIR26A2	0.0590716	13.527	0.118333	0.907617	0.943456	-6.59584	407016	microRNA 26a-2 [Source:HGNC Symbol;Acc:HGNC:31611]	12	57824609	57824692	-1
ENSG00000199121	MIR26B	0.757427	11.0157	1.77729	0.0989668	0.181317	-5.29149	407017	microRNA 26b [Source:HGNC Symbol;Acc:HGNC:31612]	2	218402646	218402722	1
ENSG00000207808	MIR27A	0.0207938	8.45164	0.0671681	0.947472	0.968243	-7.01193	407018	microRNA 27a [Source:HGNC Symbol;Acc:HGNC:31613]	19	13836440	13836517	-1
ENSG00000207864	MIR27B	1.6504	13.2681	3.04577	0.00939883	0.0276167	-2.93587	407019	microRNA 27b [Source:HGNC Symbol;Acc:HGNC:31614]	9	95085445	95085541	1
ENSG00000207651	MIR28	0.563319	11.8378	1.20496	0.249748	0.373567	-5.99871	407020	microRNA 28 [Source:HGNC Symbol;Acc:HGNC:31615]	3	188688781	188688866	1
ENSG00000268649	MIR296	-0.0314347	5.65664	-0.104228	0.918583	0.95043	-7.27882	407022	microRNA 296 [Source:HGNC Symbol;Acc:HGNC:31617]	20	58817132	58817725	-1
ENSG00000226380	MIR29A	2.02038	5.27476	6.97664	9.8e-06	0.000109938	3.47034	407021 407024	microRNA 29a [Source:HGNC Symbol;Acc:HGNC:31616]	7	130876747	130913310	-1
ENSG00000207996	MIR301A	0.427435	7.03516	1.40617	0.18318	0.29335	-6.16202	407027	microRNA 301a [Source:HGNC Symbol;Acc:HGNC:31622]	17	59151136	59151221	-1
ENSG00000212102	MIR301B	0.393648	4.96831	1.78627	0.0974435	0.178791	-5.8182	100126318	microRNA 301b [Source:HGNC Symbol;Acc:HGNC:33667]	22	21652981	21653058	1
ENSG00000211563	MIR3065	-2.91743	3.80724	-11.5765	3.29e-08	1.13e-06	9.28023	100422915	microRNA 3065 [Source:HGNC Symbol;Acc:HGNC:38234]	17	81125877	81125955	1
ENSG00000207617	MIR3074	0.125087	8.46333	0.367007	0.719533	0.811235	-6.94146	100422842	microRNA 3074 [Source:HGNC Symbol;Acc:HGNC:38268]	9	95086014	95086094	-1
ENSG00000207827	MIR30A	0.989686	13.793	1.61811	0.129692	0.225436	-5.32416	407029	microRNA 30a [Source:HGNC Symbol;Acc:HGNC:31624]	6	71403551	71403621	-1
ENSG00000207582	MIR30B	1.64115	9.04027	3.59005	0.00330598	0.0117488	-2.19712	407030	microRNA 30b [Source:HGNC Symbol;Acc:HGNC:31625]	8	134800520	134800607	-1
ENSG00000207962	MIR30C1	0.0515965	10.525	0.12846	0.899755	0.940377	-6.82542	407031	microRNA 30c-1 [Source:HGNC Symbol;Acc:HGNC:31626]	1	40757284	40757372	1
ENSG00000199094	MIR30C2	0.0622942	10.6388	0.152081	0.881464	0.9291	-6.8126	407032	microRNA 30c-2 [Source:HGNC Symbol;Acc:HGNC:31627]	6	71376960	71377031	-1
ENSG00000199153	MIR30D	0.415381	13.8401	0.758279	0.461843	0.595826	-6.28294	407033	microRNA 30d [Source:HGNC Symbol;Acc:HGNC:31628]	8	134804876	134804945	-1
ENSG00000198974	MIR30E	0.577494	12.343	1.23478	0.238819	0.361808	-5.92632	407034	microRNA 30e [Source:HGNC Symbol;Acc:HGNC:31629]	1	40754355	40754446	1
ENSG00000199177	MIR31	-1.27197	5.5119	-4.51908	0.0005803	0.00284072	-0.741505	407035	microRNA 31 [Source:HGNC Symbol;Acc:HGNC:31630]	9	21512115	21512185	-1
ENSG00000263793	MIR3115	0.488987	2.05212	2.78395	0.0155286	0.0410505	-4.28238	100422866	microRNA 3115 [Source:HGNC Symbol;Acc:HGNC:38371]	1	23044305	23044372	1
ENSG00000283340	MIR3119-2	3.87903	-1.1727	9.28885	4.29e-07	7.75e-06	6.86982	100422839 100423010	microRNA 3119-2 [Source:HGNC Symbol;Acc:HGNC:38315]	1	170151378	170151462	-1
ENSG00000283152	MIR3120	-2.67824	3.74467	-6.01077	4.41e-05	0.000369394	1.79169	100422882	microRNA 3120 [Source:HGNC Symbol;Acc:HGNC:38295]	1	172138808	172138888	1
ENSG00000264370	MIR3125	0.255755	1.55877	0.922551	0.373088	0.513014	-7.1011	100422986	microRNA 3125 [Source:HGNC Symbol;Acc:HGNC:38219]	2	12737367	12737444	1
ENSG00000264157	MIR3127	0.229982	2.05621	1.26448	0.228312	0.349368	-6.73349	100422928	microRNA 3127 [Source:HGNC Symbol;Acc:HGNC:38269]	2	96798278	96798353	1
ENSG00000265396	MIR3128	1.48236	1.46318	4.75203	0.000380593	0.00209962	-0.52087	100422824	microRNA 3128 [Source:HGNC Symbol;Acc:HGNC:38188]	2	177255945	177256010	-1
ENSG00000264755	MIR3131	-0.392297	1.28328	-2.31618	0.0375595	0.0841044	-5.14156	100422957	microRNA 3131 [Source:HGNC Symbol;Acc:HGNC:38347]	2	219058688	219058750	-1
ENSG00000263752	MIR3133	0.159324	-0.129771	0.747289	0.468223	0.602175	-7.09754	100422942	microRNA 3133 [Source:HGNC Symbol;Acc:HGNC:38305]	2	241477905	241477982	1
ENSG00000266745	MIR3135A	2.69094	-0.287447	9.18871	4.85e-07	8.46e-06	6.701	100422901	microRNA 3135a [Source:HGNC Symbol;Acc:HGNC:38199]	3	20137565	20137641	1
ENSG00000264931	MIR3138	-0.0335745	0.748095	-0.185781	0.855491	0.913778	-7.51814	100423011	microRNA 3138 [Source:HGNC Symbol;Acc:HGNC:38341]	4	10078611	10078692	-1
ENSG00000265623	MIR3139	1.66826	1.94849	7.46281	4.82e-06	6.26e-05	4.02786	100423017	microRNA 3139 [Source:HGNC Symbol;Acc:HGNC:38201]	4	143343460	143343535	1
ENSG00000253522	MIR3142HG	-0.383954	2.6233	-1.95543	0.0724294	0.140712	-5.73472	406938 107075116	MIR3142 host gene [Source:HGNC Symbol;Acc:HGNC:51944]	5	160468268	160487426	1
ENSG00000265565	MIR3143	-0.150837	1.07143	-0.728335	0.479355	0.61333	-7.27082	100422934	microRNA 3143 [Source:HGNC Symbol;Acc:HGNC:38284]	6	27147626	27147688	1
ENSG00000266712	MIR3149	0.201206	0.308062	0.87785	0.395998	0.535722	-7.08296	100422921	microRNA 3149 [Source:HGNC Symbol;Acc:HGNC:38251]	8	76966768	76966850	-1
ENSG00000264823	MIR3154	0.919336	1.48097	4.2983	0.000870724	0.00400145	-1.38229	100422893	microRNA 3154 [Source:HGNC Symbol;Acc:HGNC:38176]	9	128244947	128245030	-1
ENSG00000263436	MIR3158-1	-1.26734	5.57583	-4.55879	0.00053979	0.00268486	-0.661856	100422900 100423033	microRNA 3158-1 [Source:HGNC Symbol;Acc:HGNC:38196]	10	101601417	101601497	1
ENSG00000264607	MIR3173	-1.35771	1.20571	-5.76997	6.55e-05	0.000504141	1.2877	100422981	microRNA 3173 [Source:HGNC Symbol;Acc:HGNC:38174]	14	95137919	95137986	-1
ENSG00000265871	MIR3174	-0.785071	2.45045	-4.32275	0.000832231	0.00387322	-1.33229	100422841	microRNA 3174 [Source:HGNC Symbol;Acc:HGNC:38264]	15	90006755	90006841	1
ENSG00000266235	MIR3176	0.685835	2.32403	3.24644	0.00639002	0.0202924	-3.39386	100423037	microRNA 3176 [Source:HGNC Symbol;Acc:HGNC:38345]	16	543277	543366	1
ENSG00000265820	MIR3177	-0.988699	3.48649	-3.98994	0.00154814	0.00630716	-1.90738	100423012	microRNA 3177 [Source:HGNC Symbol;Acc:HGNC:38364]	16	1734985	1735066	1
ENSG00000265537	MIR3180-1	-1.34072	0.00664632	-7.3183	5.93e-06	7.38e-05	3.90894	100422870	microRNA 3180-1 [Source:HGNC Symbol;Acc:HGNC:38382]	16	14911220	14911313	1
ENSG00000258354	MIR3180-1	-1.17099	0.259947	-6.8264	1.23e-05	0.00013004	3.09293		microRNA 3180-1 [Source:HGNC Symbol;Acc:HGNC:38382]	16	14909887	14911345	-1
ENSG00000265373	MIR3180-2	-1.34072	0.00664632	-7.3183	5.93e-06	7.38e-05	3.90894	100422956	microRNA 3180-2 [Source:HGNC Symbol;Acc:HGNC:38343]	16	16309879	16309966	1
ENSG00000257366	MIR3180-2	-1.17099	0.259947	-6.8264	1.23e-05	0.00013004	3.09293		microRNA 3180-2 [Source:HGNC Symbol;Acc:HGNC:38343]	16	16308542	16310000	-1
ENSG00000266291	MIR3180-3	-1.34333	-0.0150792	-7.11632	7.97e-06	9.18e-05	3.60617	100422836	microRNA 3180-3 [Source:HGNC Symbol;Acc:HGNC:38239]	16	18402178	18402271	-1
ENSG00000257563	MIR3180-3	-1.14342	0.24616	-6.67167	1.55e-05	0.000158916	2.84811		microRNA 3180-3 [Source:HGNC Symbol;Acc:HGNC:38239]	16	18402146	18403604	1
ENSG00000264115	MIR3180-4	-1.40486	-0.0212739	-7.59072	4.01e-06	5.43e-05	4.3252	100500852	microRNA 3180-4 [Source:HGNC Symbol;Acc:HGNC:38920]	16	15154850	15155002	-1
ENSG00000257391	MIR3180-4	-1.30544	0.0850487	-7.15332	7.54e-06	8.81e-05	3.63938		microRNA 3180-4 [Source:HGNC Symbol;Acc:HGNC:38920]	16	15154903	15157020	1
ENSG00000264397	MIR3180-5	-1.39319	-0.0270087	-7.45235	4.89e-06	6.27e-05	4.12063	100500916	microRNA 3180-5 [Source:HGNC Symbol;Acc:HGNC:38969]	16	2135977	2136129	-1
ENSG00000266919	MIR3184	0.484159	13.1306	0.940845	0.363981	0.50346	-6.17852	100423003	microRNA 3184 [Source:HGNC Symbol;Acc:HGNC:38182]	17	30117079	30117172	-1
ENSG00000263414	MIR3187	0.458874	4.52695	2.02929	0.0634709	0.126381	-5.46861	100422854	microRNA 3187 [Source:HGNC Symbol;Acc:HGNC:38319]	19	813584	813653	1
ENSG00000265134	MIR3190	0.664872	1.40203	3.84377	0.00204005	0.00782231	-2.25079	100422899	microRNA 3190 [Source:HGNC Symbol;Acc:HGNC:38190]	19	47226942	47227021	1
ENSG00000264073	MIR3199-1	-0.938499	0.785165	-4.66073	0.000448656	0.00234461	-0.70031	100423034	microRNA 3199-1 [Source:HGNC Symbol;Acc:HGNC:38294]	22	27920525	27920612	-1
ENSG00000283225	MIR3199-2	-0.938499	0.785165	-4.66073	0.000448656	0.00234461	-0.70031	100422998	microRNA 3199-2 [Source:HGNC Symbol;Acc:HGNC:38205]	22	27920526	27920611	1
ENSG00000207698	MIR32	0.391251	6.96457	1.47055	0.165257	0.271807	-6.08346	407036	microRNA 32 [Source:HGNC Symbol;Acc:HGNC:31631]	9	109046229	109046298	-1
ENSG00000264661	MIR3200	0.288766	4.44882	0.975971	0.346934	0.486612	-6.90066	100422912	microRNA 3200 [Source:HGNC Symbol;Acc:HGNC:38227]	22	30731557	30731641	1
ENSG00000208037	MIR320A	0.732275	11.7506	1.61064	0.13132	0.226705	-5.48098	407037	microRNA 320a [Source:HGNC Symbol;Acc:HGNC:31632]	8	22244962	22245043	-1
ENSG00000211543	MIR320B1	0.269837	5.84424	1.00418	0.333662	0.472274	-6.7445	100302117	microRNA 320b-1 [Source:HGNC Symbol;Acc:HGNC:35247]	1	116671749	116671827	1
ENSG00000221406	MIR320B2	0.270139	5.84238	1.00439	0.333563	0.472274	-6.74447	100313769	microRNA 320b-2 [Source:HGNC Symbol;Acc:HGNC:35256]	1	224257004	224257141	-1
ENSG00000221493	MIR320C1	0.58841	6.08483	1.87941	0.0828452	0.156626	-5.56667	100302135	microRNA 320c-1 [Source:HGNC Symbol;Acc:HGNC:35248]	18	21683510	21683597	1
ENSG00000212051	MIR320C2	0.593612	6.00537	1.89697	0.0803242	0.152345	-5.54647	100302195	microRNA 320c-2 [Source:HGNC Symbol;Acc:HGNC:35387]	18	24321686	24321735	1
ENSG00000211491	MIR320D1	0.291815	0.470875	1.04334	0.315853	0.452675	-6.94101	100313896	microRNA 320d-1 [Source:HGNC Symbol;Acc:HGNC:35386]	13	40727828	40727875	-1
ENSG00000221081	MIR320D2	0.419418	2.11905	1.76221	0.101573	0.185269	-6.04721	100302169	microRNA 320d-2 [Source:HGNC Symbol;Acc:HGNC:35388]	X	140926172	140926219	-1
ENSG00000211513	MIR320E	0.319066	1.54423	1.19174	0.254718	0.378714	-6.81979	100422913	microRNA 320e [Source:HGNC Symbol;Acc:HGNC:38230]	19	46709293	46709345	-1
ENSG00000199069	MIR323A	-7.46708	-1.84982	-15.335	1.09e-09	7.27e-08	12.5022	442897	microRNA 323a [Source:HGNC Symbol;Acc:HGNC:31766]	14	101025732	101025817	1
ENSG00000199053	MIR324	0.784766	6.39266	2.4594	0.0287414	0.0683885	-4.55171	442898	microRNA 324 [Source:HGNC Symbol;Acc:HGNC:31767]	17	7223297	7223379	-1
ENSG00000199090	MIR326	2.14727	5.48091	6.35585	2.54e-05	0.000236625	2.49985	442900	microRNA 326 [Source:HGNC Symbol;Acc:HGNC:31769]	11	75335092	75335186	-1
ENSG00000207948	MIR328	-1.13884	6.58436	-3.85264	0.00200609	0.00770402	-1.9076	442901	microRNA 328 [Source:HGNC Symbol;Acc:HGNC:31770]	16	67202321	67202395	-1
ENSG00000199172	MIR331	0.752933	8.10049	2.17534	0.0486982	0.103541	-4.89076	442903	microRNA 331 [Source:HGNC Symbol;Acc:HGNC:31772]	12	95308420	95308513	1
ENSG00000199043	MIR335	-2.21502	10.8118	-5.39475	0.000123286	0.000841263	1.22651	442904	microRNA 335 [Source:HGNC Symbol;Acc:HGNC:31773]	7	130496111	130496204	1
ENSG00000283604	MIR338	-2.91743	3.80724	-11.5765	3.29e-08	1.13e-06	9.28023	442906	microRNA 338 [Source:HGNC Symbol;Acc:HGNC:31775]	17	81125883	81125949	-1
ENSG00000199023	MIR339	-0.299762	7.11799	-0.870227	0.399998	0.538476	-6.74608	442907	microRNA 339 [Source:HGNC Symbol;Acc:HGNC:31776]	7	1022933	1023026	-1
ENSG00000207932	MIR33A	0.0243396	6.18016	0.0951894	0.92562	0.954862	-7.22747	407039	microRNA 33a [Source:HGNC Symbol;Acc:HGNC:31634]	22	41900944	41901012	1
ENSG00000207839	MIR33B	-0.484979	2.58752	-2.00936	0.0657822	0.130146	-5.64826	693120	microRNA 33b [Source:HGNC Symbol;Acc:HGNC:32791]	17	17813836	17813931	-1
ENSG00000198995	MIR340	2.23312	12.2134	4.8416	0.000324196	0.00187187	0.329258	442908	microRNA 340 [Source:HGNC Symbol;Acc:HGNC:31777]	5	180015303	180015397	-1
ENSG00000199082	MIR342	1.21261	9.75149	2.85407	0.0135788	0.0368801	-3.53533	442909	microRNA 342 [Source:HGNC Symbol;Acc:HGNC:31778]	14	100109655	100109753	1
ENSG00000198984	MIR345	1.07809	8.09034	2.97839	0.0106979	0.030741	-3.4392	442910	microRNA 345 [Source:HGNC Symbol;Acc:HGNC:31779]	14	100307859	100307956	1
ENSG00000228526	MIR34A	2.20756	8.68682	4.59973	0.000501072	0.00255382	-0.320171	407040 106614088	microRNA 34a [Source:HGNC Symbol;Acc:HGNC:31635]	1	9148011	9196983	-1
ENSG00000207811	MIR34B	1.97183	1.61274	10.6565	8.76e-08	2.21e-06	8.2183	407041	microRNA 34b [Source:HGNC Symbol;Acc:HGNC:31636]	11	111512938	111513021	1
ENSG00000207562	MIR34C	2.71089	8.23446	5.51573	0.000100346	0.000714247	1.28951	407042	microRNA 34c [Source:HGNC Symbol;Acc:HGNC:31637]	11	111513439	111513515	1
ENSG00000283484	MIR3529	0.0741702	11.5974	0.1767	0.862474	0.917281	-6.73199	100616238	microRNA 3529 [Source:HGNC Symbol;Acc:HGNC:41564]	15	88611847	88611924	-1
ENSG00000199051	MIR361	-0.230333	9.93362	-0.593376	0.563136	0.689302	-6.69842	494323	microRNA 361 [Source:HGNC Symbol;Acc:HGNC:31867]	X	85903636	85903707	-1
ENSG00000264864	MIR3613	1.15157	6.23272	4.06572	0.00134281	0.00559014	-1.52759	100500908	microRNA 3613 [Source:HGNC Symbol;Acc:HGNC:38964]	13	49996415	49996501	-1
ENSG00000208015	MIR362	2.45928	7.41246	7.67596	3.56e-06	4.9e-05	4.65465	574030	microRNA 362 [Source:HGNC Symbol;Acc:HGNC:32022]	X	50008964	50009028	1
ENSG00000280968	MIR3653	-0.725983	0.948033	-3.25515	0.00628385	0.0200323	-3.39277	100500833	microRNA 3653 [Source:HGNC Symbol;Acc:HGNC:38971]	22	29333158	29333267	-1
ENSG00000199130	MIR365A	0.780328	3.35661	2.75393	0.0164451	0.0430142	-4.27484	100126355	microRNA 365a [Source:HGNC Symbol;Acc:HGNC:33692]	16	14309285	14309371	1
ENSG00000228768	MIR365B	0.432968	3.04963	1.63274	0.126555	0.221226	-6.20012	100126356	microRNA 365b [Source:HGNC Symbol;Acc:HGNC:33693]	17	31571142	31575659	1
ENSG00000264342	MIR3660	-0.693646	2.37076	-3.34648	0.00527237	0.0172918	-3.20726	100500825	microRNA 3660 [Source:HGNC Symbol;Acc:HGNC:38985]	5	90016621	90016720	-1
ENSG00000266751	MIR3661	-0.0680137	3.42	-0.297248	0.770985	0.850958	-7.43194	100500905	microRNA 3661 [Source:HGNC Symbol;Acc:HGNC:38892]	5	134225757	134225852	1
ENSG00000263813	MIR3679	-1.96876	0.288411	-6.62242	1.68e-05	0.000169576	2.82149	100500878	microRNA 3679 [Source:HGNC Symbol;Acc:HGNC:38979]	2	134127125	134127192	1
ENSG00000264089	MIR3681	1.05812	2.59036	4.54443	0.000554087	0.00274495	-0.891968	100500884	microRNA 3681 [Source:HGNC Symbol;Acc:HGNC:38994]	2	12199130	12199201	1
ENSG00000277437	MIR3687-1	-0.259421	0.329793	-1.41936	0.179382	0.288526	-6.49651	100500815	microRNA 3687-1 [Source:HGNC Symbol;Acc:HGNC:38946]	21	8208844	8208904	1
ENSG00000264063	MIR3687-2	-0.259421	0.329793	-1.41936	0.179382	0.288526	-6.49651	103504728	microRNA 3687-2 [Source:HGNC Symbol;Acc:HGNC:50835]	21	8987370	8987430	1
ENSG00000264105	MIR3688-1	0.76061	1.14707	3.66547	0.00286278	0.0103976	-2.5855	100500881	microRNA 3688-1 [Source:HGNC Symbol;Acc:HGNC:38986]	4	159128802	159128894	-1
ENSG00000283379	MIR3688-2	0.76061	1.14707	3.66547	0.00286278	0.0103976	-2.5855	100616303	microRNA 3688-2 [Source:HGNC Symbol;Acc:HGNC:41735]	4	159128805	159128891	1
ENSG00000265083	MIR3691	-0.828003	2.50114	-4.18717	0.00107022	0.00460231	-1.58885	100500900	microRNA 3691 [Source:HGNC Symbol;Acc:HGNC:38909]	6	5148233	5148322	-1
ENSG00000199168	MIR374A	1.89449	10.2147	4.36659	0.000767558	0.00360767	-0.648705	442919	microRNA 374a [Source:HGNC Symbol;Acc:HGNC:31788]	X	74287286	74287357	-1
ENSG00000212027	MIR374B	0.695916	10.6868	1.7655	0.100998	0.184366	-5.3349	100126317	microRNA 374b [Source:HGNC Symbol;Acc:HGNC:33665]	X	74218547	74218618	-1
ENSG00000283534	MIR374C	0.695907	10.6868	1.76547	0.101003	0.184366	-5.33494	100500807	microRNA 374c [Source:HGNC Symbol;Acc:HGNC:38907]	X	74218549	74218618	1
ENSG00000198973	MIR375	-4.5436	0.134233	-14.6686	1.88e-09	1.06e-07	12.1694	494324	microRNA 375 [Source:HGNC Symbol;Acc:HGNC:31868]	2	219001645	219001708	-1
ENSG00000199047	MIR378A	-1.22139	9.43342	-3.01178	0.0100333	0.0291354	-3.26819	494327	microRNA 378a [Source:HGNC Symbol;Acc:HGNC:31871]	5	149732825	149732890	1
ENSG00000264803	MIR378C	-1.3487	4.21453	-5.71666	7.16e-05	0.000540761	1.31392	100422867	microRNA 378c [Source:HGNC Symbol;Acc:HGNC:38374]	10	130962588	130962668	-1
ENSG00000263631	MIR378D1	-1.17733	1.68596	-6.11154	3.75e-05	0.000324815	1.86891	100616201	microRNA 378d-1 [Source:HGNC Symbol;Acc:HGNC:41550]	4	5923275	5923328	-1
ENSG00000264448	MIR378D2	-1.10336	1.74944	-5.94708	4.9e-05	0.000398989	1.59222	100616169	microRNA 378d-2 [Source:HGNC Symbol;Acc:HGNC:41797]	8	93915734	93916682	-1
ENSG00000199088	MIR379	-7.5384	-0.820582	-11.2706	4.53e-08	1.42e-06	9.05279	494328	microRNA 379 [Source:HGNC Symbol;Acc:HGNC:31872]	14	101022066	101022132	1
ENSG00000199020	MIR381	-8.37467	0.987866	-15.2223	1.19e-09	7.76e-08	12.3841	494330	microRNA 381 [Source:HGNC Symbol;Acc:HGNC:31874]	14	101045920	101045994	1
ENSG00000283170	MIR382	-6.60173	-2.24402	-14.5826	2.02e-09	1.09e-07	11.9483	494331	microRNA 382 [Source:HGNC Symbol;Acc:HGNC:31875]	14	101054306	101054381	1
ENSG00000266320	MIR3909	-1.88362	3.71789	-6.20553	3.23e-05	0.000287403	2.10842	100500826	microRNA 3909 [Source:HGNC Symbol;Acc:HGNC:38987]	22	35335640	35335758	1
ENSG00000264249	MIR3912	-0.0687351	1.47819	-0.314657	0.758028	0.843123	-7.49315	100500831	microRNA 3912 [Source:HGNC Symbol;Acc:HGNC:38923]	5	171386656	171386760	-1
ENSG00000264405	MIR3913-1	0.36683	3.56719	1.87862	0.0829604	0.156626	-5.79107	100500903	microRNA 3913-1 [Source:HGNC Symbol;Acc:HGNC:38884]	12	69584722	69584823	-1
ENSG00000283677	MIR3913-2	0.36683	3.56719	1.87862	0.0829604	0.156626	-5.79107	100500868	microRNA 3913-2 [Source:HGNC Symbol;Acc:HGNC:38953]	12	69584723	69584822	1
ENSG00000264295	MIR3922	-1.06734	1.34398	-3.79782	0.00222569	0.00841684	-2.34847	100500843	microRNA 3922 [Source:HGNC Symbol;Acc:HGNC:38895]	12	104591633	104591716	1
ENSG00000264141	MIR3928	-1.41712	2.39444	-7.07639	8.45e-06	9.69e-05	3.43905	100500901	microRNA 3928 [Source:HGNC Symbol;Acc:HGNC:38933]	22	31160062	31160119	-1
ENSG00000265641	MIR3929	-3.83728	-1.11847	-8.29208	1.53e-06	2.33e-05	5.60979	100500864	microRNA 3929 [Source:HGNC Symbol;Acc:HGNC:38945]	18	35934088	35934142	-1
ENSG00000266509	MIR3934	2.13681	1.36374	10.0337	1.77e-07	3.68e-06	7.50568	100500873	microRNA 3934 [Source:HGNC Symbol;Acc:HGNC:38965]	6	33698128	33698234	1
ENSG00000264013	MIR3938	-1.11084	1.02885	-4.45604	0.000651216	0.00312004	-1.08953	100500875	microRNA 3938 [Source:HGNC Symbol;Acc:HGNC:38972]	3	55852492	55852594	-1
ENSG00000265828	MIR3939	-0.698904	0.423671	-2.325	0.0369487	0.0829003	-5.09008	100500857	microRNA 3939 [Source:HGNC Symbol;Acc:HGNC:38931]	6	166997807	166997912	-1
ENSG00000265395	MIR3944	-0.126499	0.72333	-0.551084	0.590945	0.712297	-7.37574	100500911	microRNA 3944 [Source:HGNC Symbol;Acc:HGNC:38898]	10	133371556	133371663	-1
ENSG00000199107	MIR409	-7.29773	-0.763124	-14.5043	2.16e-09	1.14e-07	11.8871	574413	microRNA 409 [Source:HGNC Symbol;Acc:HGNC:32055]	14	101065300	101065378	1
ENSG00000199109	MIR411	-6.34056	-2.37578	-17.1082	2.8e-10	2.24e-08	13.6786	693121	microRNA 411 [Source:HGNC Symbol;Acc:HGNC:32792]	14	101023325	101023420	1
ENSG00000202566	MIR421	0.270162	8.19422	0.810658	0.432188	0.56796	-6.69492	693122	microRNA 421 [Source:HGNC Symbol;Acc:HGNC:32793]	X	74218377	74218461	-1
ENSG00000199032	MIR425	1.35725	10.1878	3.44592	0.00435638	0.0147415	-2.38712	494337	microRNA 425 [Source:HGNC Symbol;Acc:HGNC:31882]	3	49020148	49020234	-1
ENSG00000266104	MIR4326	0.180158	5.56003	0.668137	0.515762	0.649488	-7.05795	100422945	microRNA 4326 [Source:HGNC Symbol;Acc:HGNC:38314]	20	63286808	63286866	1
ENSG00000266110	MIR4423	-0.983185	1.29185	-4.17176	0.00110139	0.00468751	-1.63211	100616481	microRNA 4423 [Source:HGNC Symbol;Acc:HGNC:41784]	1	85133794	85133873	1
ENSG00000266109	MIR4440	0.108436	0.164747	0.618591	0.546898	0.674635	-7.25944	100616397	microRNA 4440 [Source:HGNC Symbol;Acc:HGNC:41740]	2	239068817	239068914	-1
ENSG00000264408	MIR4470	-0.0490964	1.7991	-0.271483	0.790293	0.864645	-7.50264	100616484	microRNA 4470 [Source:HGNC Symbol;Acc:HGNC:41833]	8	61714788	61714859	1
ENSG00000263790	MIR4473	-1.08113	5.2064	-4.69347	0.0004229	0.0022479	-0.44407	100616229	microRNA 4473 [Source:HGNC Symbol;Acc:HGNC:41540]	9	20411148	20411238	-1
ENSG00000264941	MIR4474	-1.72712	-0.140021	-6.11854	3.71e-05	0.000323437	2.07552	100616441	microRNA 4474 [Source:HGNC Symbol;Acc:HGNC:41821]	9	20502265	20502342	-1
ENSG00000266852	MIR4482	-1.00527	2.13597	-4.73777	0.000390469	0.00213508	-0.554183	100616323	microRNA 4482 [Source:HGNC Symbol;Acc:HGNC:41792]	10	104268336	104268405	-1
ENSG00000266704	MIR4498	-0.859511	0.556265	-3.17929	0.0072707	0.022289	-3.51655	100616179	microRNA 4498 [Source:HGNC Symbol;Acc:HGNC:41838]	12	120155434	120155499	-1
ENSG00000251856	MIR449C	0.549617	0.636749	3.06	0.0091452	0.0270444	-3.72629	100313923	microRNA 449c [Source:HGNC Symbol;Acc:HGNC:37302]	5	55172262	55172353	-1
ENSG00000264712	MIR4504	-0.230295	0.57606	-1.00748	0.332133	0.470918	-7.00341	100616261	microRNA 4504 [Source:HGNC Symbol;Acc:HGNC:41624]	14	50299855	50299946	-1
ENSG00000199132	MIR450A1	2.28813	5.83708	10.1872	1.48e-07	3.28e-06	7.82907	554214	microRNA 450a-1 [Source:HGNC Symbol;Acc:HGNC:28008]	X	134540341	134540431	-1
ENSG00000207755	MIR450A2	2.26071	5.88007	9.89578	2.08e-07	4.21e-06	7.48682	574505	microRNA 450a-2 [Source:HGNC Symbol;Acc:HGNC:32137]	X	134540508	134540607	-1
ENSG00000216001	MIR450B	2.81887	9.48223	7.40963	5.2e-06	6.6e-05	4.36748	100126302	microRNA 450b [Source:HGNC Symbol;Acc:HGNC:33642]	X	134540185	134540262	-1
ENSG00000283160	MIR4521	0.91971	9.8766	1.99578	0.0674005	0.132742	-5.03741	100616406	microRNA 4521 [Source:HGNC Symbol;Acc:HGNC:41813]	17	8186945	8187004	1
ENSG00000279010	MIR4534	2.21166	1.66516	7.3547	5.63e-06	7.08e-05	3.88414	100616146 102465492	microRNA 4534 [Source:HGNC Symbol;Acc:HGNC:41692]	22	37948352	38002889	1
ENSG00000211514	MIR454	1.2588	9.79899	3.45425	0.00428734	0.0145484	-2.40002	768216	microRNA 454 [Source:HGNC Symbol;Acc:HGNC:33137]	17	59137758	59137872	-1
ENSG00000207726	MIR455	-0.724159	9.31335	-2.07098	0.0588771	0.11954	-4.9628	619556	microRNA 455 [Source:HGNC Symbol;Acc:HGNC:32344]	9	114209434	114209529	1
ENSG00000266415	MIR4636	-3.1199	-0.226004	-9.15209	5.08e-07	8.73e-06	6.62245	100616326	microRNA 4636 [Source:HGNC Symbol;Acc:HGNC:41798]	5	9053816	9053895	-1
ENSG00000264732	MIR4638	-0.201403	0.282959	-1.21711	0.24525	0.369066	-6.74075	100616342	microRNA 4638 [Source:HGNC Symbol;Acc:HGNC:41841]	5	181222566	181222633	-1
ENSG00000266750	MIR4645	0.686607	0.993962	2.91081	0.0121796	0.0338594	-4.02887	100616285	microRNA 4645 [Source:HGNC Symbol;Acc:HGNC:41689]	6	2854031	2854107	-1
ENSG00000266776	MIR4646	0.571774	1.46662	2.44374	0.029599	0.0697591	-4.90532	100616230	microRNA 4646 [Source:HGNC Symbol;Acc:HGNC:41543]	6	31701029	31701091	-1
ENSG00000265423	MIR4652	-0.343158	2.3782	-1.33216	0.205745	0.322143	-6.64581	100616206	microRNA 4652 [Source:HGNC Symbol;Acc:HGNC:41615]	7	93716928	93717005	1
ENSG00000266038	MIR4659A	-1.2713	0.361625	-5.97551	4.67e-05	0.000385989	1.69059	100616348	microRNA 4659a [Source:HGNC Symbol;Acc:HGNC:41857]	8	6745164	6745244	1
ENSG00000283386	MIR4659B	-1.2713	0.361625	-5.97551	4.67e-05	0.000385989	1.69059	100616372	microRNA 4659b [Source:HGNC Symbol;Acc:HGNC:41530]	8	6745168	6745240	-1
ENSG00000265376	MIR466	-1.85578	0.435479	-7.15407	7.54e-06	8.81e-05	3.61976	100423038	microRNA 466 [Source:HGNC Symbol;Acc:HGNC:38359]	3	31161704	31161787	-1
ENSG00000266194	MIR4661	0.371471	0.558898	2.00368	0.0664549	0.131162	-5.62975	100616245	microRNA 4661 [Source:HGNC Symbol;Acc:HGNC:41582]	8	91205485	91205559	1
ENSG00000283609	MIR4662A	-1.64999	0.533019	-5.00438	0.000242875	0.00149652	-0.0199543	100616221	microRNA 4662a [Source:HGNC Symbol;Acc:HGNC:41826]	8	124821985	124822051	1
ENSG00000263735	MIR4662B	-1.64999	0.533019	-5.00438	0.000242875	0.00149652	-0.0199543	100616255	microRNA 4662b [Source:HGNC Symbol;Acc:HGNC:41607]	8	124821978	124822058	-1
ENSG00000265660	MIR4664	0.300401	2.19567	1.36998	0.193948	0.306383	-6.59909	100616318	microRNA 4664 [Source:HGNC Symbol;Acc:HGNC:41777]	8	143733083	143733153	-1
ENSG00000263575	MIR4665	-2.99299	0.592549	-12.8941	9.04e-09	3.91e-07	10.6356	100616288	microRNA 4665 [Source:HGNC Symbol;Acc:HGNC:41696]	9	6007826	6007904	1
ENSG00000265201	MIR4677	1.60182	4.35438	7.17642	7.29e-06	8.68e-05	3.70588	100616343	microRNA 4677 [Source:HGNC Symbol;Acc:HGNC:41844]	1	243346176	243346255	1
ENSG00000265422	MIR4684	-1.12288	0.784989	-5.22551	0.000164995	0.00107551	0.33683	100616391	microRNA 4684 [Source:HGNC Symbol;Acc:HGNC:41695]	1	22719517	22719598	1
ENSG00000266041	MIR4690	-0.111003	0.997201	-0.595418	0.561812	0.688953	-7.36044	100616292	microRNA 4690 [Source:HGNC Symbol;Acc:HGNC:41707]	11	65636310	65636369	1
ENSG00000266531	MIR4706	0.559504	1.06375	2.23847	0.0433665	0.0943926	-5.26026	100616490	microRNA 4706 [Source:HGNC Symbol;Acc:HGNC:41576]	14	65044688	65044769	1
ENSG00000266593	MIR4713	0.0484246	2.22501	0.195993	0.847653	0.908934	-7.51943	100616369	microRNA 4713 [Source:HGNC Symbol;Acc:HGNC:41899]	15	51242190	51242264	1
ENSG00000264004	MIR4717	-0.426801	1.03789	-2.25225	0.0422786	0.0924309	-5.25244	100616241	microRNA 4717 [Source:HGNC Symbol;Acc:HGNC:41571]	16	2274620	2274691	1
ENSG00000273627	MIR4726	0.192859	0.727465	0.827813	0.42275	0.559077	-7.17146	100616153	microRNA 4726 [Source:HGNC Symbol;Acc:HGNC:41722]	17	38719691	38719748	1
ENSG00000265178	MIR4728	1.31207	0.044686	6.115	3.73e-05	0.000324146	2.06548	100616132	microRNA 4728 [Source:HGNC Symbol;Acc:HGNC:41632]	17	39726495	39726561	1
ENSG00000266392	MIR4740	-0.0193565	0.368449	-0.0895898	0.929982	0.957425	-7.49648	100616294	microRNA 4740 [Source:HGNC Symbol;Acc:HGNC:41711]	17	81400716	81400778	-1
ENSG00000266618	MIR4742	0.272844	2.07736	1.36531	0.195373	0.308045	-6.60757	100616468	microRNA 4742 [Source:HGNC Symbol;Acc:HGNC:41565]	1	224398227	224398311	-1
ENSG00000266437	MIR4746	-0.480262	4.5383	-1.887	0.0817473	0.154926	-5.70047	100616371	microRNA 4746 [Source:HGNC Symbol;Acc:HGNC:41904]	19	4445978	4446048	1
ENSG00000263409	MIR4747	0.355461	1.0839	1.96353	0.0713937	0.138918	-5.72914	100616337	microRNA 4747 [Source:HGNC Symbol;Acc:HGNC:41827]	19	4932687	4932740	1
ENSG00000264616	MIR4755	-1.48984	-0.0420664	-6.24308	3.04e-05	0.000272661	2.23179	100616434	microRNA 4755 [Source:HGNC Symbol;Acc:HGNC:41815]	20	34049119	34049190	1
ENSG00000272543	MIR4787	-0.389865	1.63426	-1.31524	0.211212	0.32842	-6.67261	100616138	microRNA 4787 [Source:HGNC Symbol;Acc:HGNC:41653]	3	50675080	50675163	1
ENSG00000265850	MIR4797	0.264789	0.733998	1.00085	0.33521	0.474195	-7.01056	100616216	microRNA 4797 [Source:HGNC Symbol;Acc:HGNC:41758]	3	197293878	197293948	-1
ENSG00000207805	MIR483	-4.81291	-0.185763	-11.4581	3.72e-08	1.2e-06	9.26215	619552	microRNA 483 [Source:HGNC Symbol;Acc:HGNC:32340]	11	2134134	2134209	-1
ENSG00000274705	MIR486-1	-7.14567	2.08752	-20.2945	3.29e-11	4.29e-09	15.9813	619554	microRNA 486-1 [Source:HGNC Symbol;Acc:HGNC:32342]	8	41660441	41660508	-1
ENSG00000283450	MIR486-2	-7.14567	2.08752	-20.2945	3.29e-11	4.29e-09	15.9813	102465696	microRNA 486-2 [Source:HGNC Symbol;Acc:HGNC:50213]	8	41660444	41660507	1
ENSG00000202609	MIR488	-3.50795	3.12899	-13.7408	4.17e-09	2.03e-07	11.3881	574441	microRNA 488 [Source:HGNC Symbol;Acc:HGNC:32073]	1	177029363	177029445	-1
ENSG00000207609	MIR491	-0.0909562	3.68144	-0.396173	0.698419	0.797595	-7.37422	574444	microRNA 491 [Source:HGNC Symbol;Acc:HGNC:32076]	9	20716105	20716188	1
ENSG00000267532	MIR497HG	-1.03755	2.79153	-5.9489	4.88e-05	0.000398989	1.6142	406971 574456 100506755	mir-497-195 cluster host gene [Source:HGNC Symbol;Acc:HGNC:39523]	17	7015818	7019659	-1
ENSG00000207635	MIR499A	-0.808646	3.9136	-3.23986	0.00647129	0.0204655	-3.31636	574501	microRNA 499a [Source:HGNC Symbol;Acc:HGNC:32133]	20	34990376	34990497	1
ENSG00000283441	MIR499B	-0.808646	3.9136	-3.23986	0.00647129	0.0204655	-3.31636	100616134	microRNA 499b [Source:HGNC Symbol;Acc:HGNC:41640]	20	34990400	34990472	-1
ENSG00000263909	MIR5000	1.19728	1.22965	4.48457	0.000618077	0.00298436	-1.01396	100846995	microRNA 5000 [Source:HGNC Symbol;Acc:HGNC:43464]	2	75090812	75090914	1
ENSG00000266383	MIR5002	-0.191888	0.611492	-0.882811	0.393409	0.533666	-7.12386	100847021	microRNA 5002 [Source:HGNC Symbol;Acc:HGNC:43470]	3	124132929	124133025	1
ENSG00000264796	MIR5009	0.176537	0.182994	0.756081	0.463115	0.596845	-7.16248	100846993	microRNA 5009 [Source:HGNC Symbol;Acc:HGNC:43458]	15	89883931	89884030	-1
ENSG00000207785	MIR500A	1.95588	9.72301	4.83836	0.000326075	0.00187398	0.183739	574502	microRNA 500a [Source:HGNC Symbol;Acc:HGNC:32134]	X	50008431	50008514	1
ENSG00000239057	MIR500B	3.00943	6.83933	9.21053	4.72e-07	8.3e-06	6.69386	100422911	microRNA 500b [Source:HGNC Symbol;Acc:HGNC:38223]	X	50010672	50010750	1
ENSG00000211538	MIR501	1.90385	9.2172	4.91739	0.000283284	0.00167869	0.293243	574503	microRNA 501 [Source:HGNC Symbol;Acc:HGNC:32135]	X	50009722	50009805	1
ENSG00000272080	MIR502	1.62514	6.76503	5.48619	0.000105499	0.000742387	1.1225	574504	microRNA 502 [Source:HGNC Symbol;Acc:HGNC:32136]	X	50014598	50014683	1
ENSG00000208005	MIR503	0.928714	6.65805	3.10742	0.00834841	0.0250655	-3.3238	574506	microRNA 503 [Source:HGNC Symbol;Acc:HGNC:32138]	X	134546328	134546398	-1
ENSG00000223749	MIR503HG	1.03307	7.06977	3.54015	0.00363689	0.0127187	-2.45941	84848 494336	MIR503 host gene [Source:HGNC Symbol;Acc:HGNC:28258]	X	134543337	134546711	-1
ENSG00000207800	MIR504	-0.183706	8.88731	-0.495593	0.628474	0.742932	-6.84504	574507	microRNA 504 [Source:HGNC Symbol;Acc:HGNC:32139]	X	138667711	138667793	-1
ENSG00000207633	MIR505	-0.15059	6.05045	-0.564673	0.581932	0.705327	-7.07695	574508	microRNA 505 [Source:HGNC Symbol;Acc:HGNC:32140]	X	139924148	139924231	-1
ENSG00000207731	MIR506	5.14074	2.97751	15.8622	7.15e-10	5.21e-08	13.1835	574511	microRNA 506 [Source:HGNC Symbol;Acc:HGNC:32143]	X	147230720	147230843	-1
ENSG00000207589	MIR508	5.8765	4.24577	21.2446	1.85e-11	3.91e-09	16.6625	574513	microRNA 508 [Source:HGNC Symbol;Acc:HGNC:32145]	X	147236913	147237027	-1
ENSG00000208000	MIR509-1	5.88531	2.77731	23.114	6.36e-12	3.51e-09	17.6409	574514	microRNA 509-1 [Source:HGNC Symbol;Acc:HGNC:32146]	X	147260532	147260625	-1
ENSG00000212013	MIR509-2	5.88531	2.77731	23.114	6.36e-12	3.51e-09	17.6409	100126301	microRNA 509-2 [Source:HGNC Symbol;Acc:HGNC:33641]	X	147258760	147258850	-1
ENSG00000212014	MIR509-3	5.85009	5.96545	22.635	8.29e-12	3.51e-09	17.224	100126337	microRNA 509-3 [Source:HGNC Symbol;Acc:HGNC:33675]	X	147259652	147259726	-1
ENSG00000264966	MIR5094	0.566457	0.472888	3.21894	0.0067369	0.0210432	-3.39974	100847059	microRNA 5094 [Source:HGNC Symbol;Acc:HGNC:43519]	15	89850637	89850721	-1
ENSG00000207641	MIR510	5.39808	-0.634311	14.8364	1.63e-09	9.63e-08	12.1385	574515	microRNA 510 [Source:HGNC Symbol;Acc:HGNC:32147]	X	147272335	147272408	-1
ENSG00000207873	MIR513A1	5.31364	-0.873636	12.1478	1.85e-08	7.19e-07	9.9017	574509	microRNA 513a-1 [Source:HGNC Symbol;Acc:HGNC:32141]	X	147213463	147213591	-1
ENSG00000207984	MIR513A2	5.15468	-0.781535	11.5171	3.5e-08	1.14e-06	9.29835	574510	microRNA 513a-2 [Source:HGNC Symbol;Acc:HGNC:32142]	X	147225826	147225952	-1
ENSG00000207871	MIR513B	5.93519	-1.92527	13.8365	3.84e-09	1.9e-07	11.3663	100313822	microRNA 513b [Source:HGNC Symbol;Acc:HGNC:33935]	X	147199044	147199127	-1
ENSG00000216171	MIR513C	5.28102	-0.857312	10.4718	1.08e-07	2.59e-06	8.22057	100302114	microRNA 513c [Source:HGNC Symbol;Acc:HGNC:33934]	X	147189704	147189787	-1
ENSG00000207868	MIR514A1	5.76618	4.86215	20.6268	2.68e-11	3.91e-09	16.2824	574516	microRNA 514a-1 [Source:HGNC Symbol;Acc:HGNC:32148]	X	147279247	147279344	-1
ENSG00000207866	MIR514A2	5.76633	4.86222	20.6272	2.68e-11	3.91e-09	16.2826	574517	microRNA 514a-2 [Source:HGNC Symbol;Acc:HGNC:32149]	X	147281943	147282030	-1
ENSG00000207867	MIR514A3	5.76633	4.86222	20.6272	2.68e-11	3.91e-09	16.2826	574518	microRNA 514a-3 [Source:HGNC Symbol;Acc:HGNC:32150]	X	147284641	147284728	-1
ENSG00000252583	MIR514B	4.82926	0.305026	15.189	1.22e-09	7.76e-08	12.4867	100422847	microRNA 514b [Source:HGNC Symbol;Acc:HGNC:38292]	X	147250151	147250230	-1
ENSG00000207758	MIR532	2.08526	12.3555	4.33434	0.000814614	0.0038	-0.582304	693124	microRNA 532 [Source:HGNC Symbol;Acc:HGNC:32795]	X	50003148	50003238	1
ENSG00000207784	MIR542	3.51805	7.64772	8.75202	8.4e-07	1.37e-05	6.14391	664617	microRNA 542 [Source:HGNC Symbol;Acc:HGNC:32534]	X	134541341	134541437	-1
ENSG00000283682	MIR548AH	1.03592	1.79939	3.95822	0.00164343	0.00660842	-2.03423	100616254	microRNA 548ah [Source:HGNC Symbol;Acc:HGNC:41605]	4	76575551	76575626	1
ENSG00000264402	MIR548AL	1.10451	0.287577	5.31888	0.000140423	0.000942624	0.623239	100616215	microRNA 548al [Source:HGNC Symbol;Acc:HGNC:41736]	11	74399237	74399333	1
ENSG00000265144	MIR548AM	2.0085	3.61499	8.13977	1.88e-06	2.8e-05	5.07953	100616428	microRNA 548am [Source:HGNC Symbol;Acc:HGNC:41637]	X	16627012	16627085	-1
ENSG00000264539	MIR548AR	0.200441	0.11875	0.861281	0.404727	0.543098	-7.05736	100847035	microRNA 548ar [Source:HGNC Symbol;Acc:HGNC:43455]	13	114244505	114244561	1
[truncated: 156 more rows]
