# Supplementary material for: CD146-assisted isolation and multi-omics characterisation of human pluripotent stem cell derived cranial Schwann cell precursor-like cells.
Source: Research Square preprint supplement (doi:10.21203/rs.3.rs-3324198/v1), 2023-09-19
Supplement: Supplementary file 11 [file b7125ebf34492d0e7efa02d2.xlsx]

## Sheet: Sheet1
Top 20 6-mers for CELF2 and ELAVL4
RBP	DATASET	PROCESSING_METHOD	5-MERS
CELF2-STIMULATED	GSE71264	10.1080/15476286.2016.1176663	TGTCTG, TGTATG, TGTGTG, CTGTCT, TTGTCT, GTGTCT, GTGTCA, TGTGTC, TGTGTT, TTGTGT, TGTGTA, ATGTGT, TATGTG, GTGTGT, TTCTGT, TCTGTT, TCTGTC, GTCTGT, TCTGTG, CTGTGT
CELF2-UNSTIMULATED	GSE71264	10.1080/15476286.2016.1176663	TGTGTT, TGTGTA, ATGTGT, CTGTGT, TGTGTG, GTCTGT, TTCTGT, TCTGTG, TATGTG, GTATGT, GTGTGT, TTGTGT, TTTGTG, GTGTCA, TGTCAG, CTGTCT, TCTGTC, TGTCTG, GTGTCT, TGTGTC
ELAVL4	ENCODE ID: ENCSR171TTH	https://doi.org/10.1016/j.molcel.2018.05.001	TTTTTT, TTATTT, TAATTT, TATTTT, TTGTTT, TTTATT, TTCTTT, TCATTT, TTAGTT, TTTTTA, ATTATT, TTAATT, TATGTT, TACTTT, TAAGTT, TGATTT, TTTGTT, TTTTAT, TAGTTT, ATTTTT
Celf2 stimulated and unstimulated k-mers were combined for constructing the splicing maps
