# Supplementary material for: CD146-assisted isolation and multi-omics characterisation of human pluripotent stem cell derived cranial Schwann cell precursor-like cells.
Source: Research Square preprint supplement (doi:10.21203/rs.3.rs-3324198/v1), 2023-09-19
Supplement: Supplementary file 12 [file c34a95d9e8eb669a34223aeb.xlsx]

## Sheet: scRNA Fold Change
scRNA Fold Change
ENSEMBL	Symbol	Description	Chromosome	logFC	logCPM	Adj.Pvalue
maple_polyA	MAPLE	IRES-mMaple-Puro-PolyA reporter sequence	NA	7.22963	10.3766	0
ENSG00000137571	SLCO5A1	solute carrier organic anion transporter family member 5A1	chr8	-3.49571	10.5553	9.73e-94
ENSG00000150244	TRIM48	tripartite motif containing 48	chr11	7.08138	9.16783	1.49e-93
ENSG00000131747	TOP2A	topoisomerase (DNA) II alpha	chr17	0.226514	9.39613	1
ENSG00000230876	LINC00486	long intergenic non-protein coding RNA 486	chr2	2.17619	10.2803	1.11e-16
ENSG00000117724	CENPF	centromere protein F	chr1	0.504521	9.71315	1
ENSG00000148773	MKI67	marker of proliferation Ki-67	chr10	0.569731	9.19585	1
ENSG00000115461	IGFBP5	insulin like growth factor binding protein 5	chr2	-3.16884	8.53944	6.7e-33
ENSG00000066279	ASPM	abnormal spindle microtubule assembly	chr1	0.545819	8.93655	1
ENSG00000128710	HOXD10	homeobox D10	chr2	-5.21841	8.16611	3.36e-234
ENSG00000138061	CYP1B1	cytochrome P450 family 1 subfamily B member 1	chr2	-5.19061	8.26199	1.12e-78
ENSG00000164692	COL1A2	collagen type I alpha 2 chain	chr7	-3.8203	8.31785	5.81e-40
ENSG00000043355	ZIC2	Zic family member 2	chr13	-5.64748	8.0321	8.34e-273
ENSG00000064300	NGFR	nerve growth factor receptor	chr17	2.77596	9.20138	6.9e-53
ENSG00000138778	CENPE	centromere protein E	chr4	0.292625	8.68209	1
ENSG00000065361	ERBB3	erb-b2 receptor tyrosine kinase 3	chr12	3.26848	9.16797	1.26e-117
ENSG00000134323	MYCN	MYCN proto-oncogene, bHLH transcription factor	chr2	2.43886	9.19132	7.92e-27
ENSG00000048740	CELF2	CUGBP Elav-like family member 2	chr10	3.69951	8.79071	1.07e-111
ENSG00000104332	SFRP1	secreted frizzled related protein 1	chr8	3.07511	9.03727	4.55e-62
ENSG00000198901	PRC1	protein regulator of cytokinesis 1	chr15	1.04684	8.48423	1
ENSG00000245532	NEAT1	nuclear paraspeckle assembly transcript 1 (non-protein coding)	NA	-0.83912	9.45701	1
ENSG00000131711	MAP1B	microtubule associated protein 1B	chr5	-1.90068	9.47138	1.38e-21
ENSG00000182985	CADM1	cell adhesion molecule 1	chr11	2.67151	9.38081	4.56e-68
ENSG00000151892	GFRA1	GDNF family receptor alpha 1	chr10	4.48456	8.28686	4.68e-86
ENSG00000120875	DUSP4	dual specificity phosphatase 4	chr8	3.75201	8.407	3.65e-63
ENSG00000275215	LOC100008587	RNA, 5.8S ribosomal	NA	-3.51629	8.13902	1.42e-103
ENSG00000171617	ENC1	ectodermal-neural cortex 1	chr5	2.99642	8.44405	2.5e-41
ENSG00000079931	MOXD1	monooxygenase DBH like 1	chr6	4.35976	8.30277	2.95e-87
ENSG00000164104	HMGB2	high mobility group box 2	chr4	0.4972	8.31995	1
ENSG00000113810	SMC4	structural maintenance of chromosomes 4	chr3	0.670768	9.43072	1
ENSG00000137203	TFAP2A	transcription factor AP-2 alpha	chr6	2.05711	8.22152	5.66e-09
ENSG00000152977	ZIC1	Zic family member 1	chr3	-5.81933	7.61875	5.14e-216
ENSG00000106546	AHR	aryl hydrocarbon receptor	chr7	4.98507	7.89493	7.67e-59
ENSG00000124762	CDKN1A	cyclin dependent kinase inhibitor 1A	chr6	1.41888	8.1936	0.0497853
ENSG00000123560	PLP1	proteolipid protein 1	chrX	2.31314	8.96749	4.23e-35
ENSG00000143013	LMO4	LIM domain only 4	chr1	2.58143	8.97066	9.94e-52
ENSG00000188229	TUBB4B	tubulin beta 4B class IVb	chr9	-0.595341	8.66701	1
ENSG00000170540	ARL6IP1	ADP ribosylation factor like GTPase 6 interacting protein 1	chr16	-0.385578	8.81087	1
ENSG00000007237	GAS7	growth arrest specific 7	chr17	3.11097	8.45987	1.03e-55
ENSG00000140937	CDH11	cadherin 11	chr16	-5.54766	7.61115	1.24e-190
ENSG00000170312	CDK1	cyclin dependent kinase 1	chr10	1.00814	8.07568	1
ENSG00000140807	NKD1	naked cuticle homolog 1	chr16	-2.66228	8.07483	1.68e-35
ENSG00000134057	CCNB1	cyclin B1	chr5	-0.0166185	8.0045	1
ENSG00000018625	ATP1A2	ATPase Na+/K+ transporting subunit alpha 2	chr1	-1.99904	9.12088	1.43e-25
ENSG00000137573	SULF1	sulfatase 1	chr8	-3.69487	7.80579	4.04e-75
ENSG00000149948	HMGA2	high mobility group AT-hook 2	chr12	2.05382	9.85279	3.94e-35
ENSG00000137804	NUSAP1	nucleolar and spindle associated protein 1	chr15	0.484772	8.05211	1
ENSG00000166450	PRTG	protogenin	chr15	-0.860289	8.67538	1
ENSG00000169554	ZEB2	zinc finger E-box binding homeobox 2	chr2	1.8629	9.18435	8.67e-14
ENSG00000104722	NEFM	neurofilament medium	chr8	-4.81906	7.5597	2.71e-92
ENSG00000166851	PLK1	polo like kinase 1	chr16	0.833911	8.18116	1
ENSG00000187678	SPRY4	sprouty RTK signaling antagonist 4	chr5	0.796014	8.30695	1
ENSG00000007384	RHBDF1	rhomboid 5 homolog 1	chr16	1.84257	8.61959	1.49e-10
ENSG00000148848	ADAM12	ADAM metallopeptidase domain 12	chr10	3.49175	7.96348	5.82e-39
ENSG00000185551	MIR1469	microRNA 1469	NA	1.83405	9.24588	4.28e-18
ENSG00000138182	KIF20B	kinesin family member 20B	chr10	0.918481	8.045	1
ENSG00000184564	SLITRK6	SLIT and NTRK like family member 6	chr13	2.83633	7.7383	1.94e-13
ENSG00000144355	DLX1	distal-less homeobox 1	chr2	4.32547	7.76087	4.74e-49
ENSG00000115844	DLX2	distal-less homeobox 2	chr2	4.70898	7.75734	1.41e-55
ENSG00000013810	TACC3	transforming acidic coiled-coil containing protein 3	chr4	0.355051	7.95767	1
ENSG00000088325	TPX2	TPX2, microtubule nucleation factor	chr20	0.311148	7.80474	1
ENSG00000169851	PCDH7	protocadherin 7	chr4	-2.88983	7.73607	2.63e-35
ENSG00000105894	PTN	pleiotrophin	chr7	2.02626	9.14252	2.94e-23
ENSG00000197061	HIST1H4C	histone cluster 1 H4 family member c	chr6	0.831349	7.87567	1
ENSG00000109805	NCAPG	non-SMC condensin I complex subunit G	chr4	0.305979	8.00929	1
ENSG00000106278	PTPRZ1	protein tyrosine phosphatase, receptor type Z1	chr7	3.31225	8.14217	7.73e-52
ENSG00000079215	SLC1A3	solute carrier family 1 member 3	chr5	-3.89099	7.61704	8.22e-82
ENSG00000176890	TYMS	thymidylate synthetase	chr18	0.689498	8.40735	1
ENSG00000242265	PEG10	paternally expressed 10	chr7	-0.952909	8.88385	1
ENSG00000075223	SEMA3C	semaphorin 3C	chr7	2.6402	8.197	7.74e-29
ENSG00000154856	APCDD1	APC down-regulated 1	chr18	-1.652	8.21839	1.09e-06
ENSG00000112972	HMGCS1	3-hydroxy-3-methylglutaryl-CoA synthase 1	chr5	-0.280241	10.6555	1
ENSG00000101144	BMP7	bone morphogenetic protein 7	chr20	-2.35079	7.72457	3.56e-16
ENSG00000178999	AURKB	aurora kinase B	chr17	0.619087	7.92428	1
ENSG00000112984	KIF20A	kinesin family member 20A	chr5	0.296913	7.65413	1
ENSG00000126787	DLGAP5	DLG associated protein 5	chr14	0.101847	7.78793	1
ENSG00000131914	LIN28A	lin-28 homolog A	chr1	0.584013	8.53989	1
ENSG00000145386	CCNA2	cyclin A2	chr4	0.368376	7.8224	1
ENSG00000175274	TP53I11	tumor protein p53 inducible protein 11	chr11	2.14793	8.43098	1.99e-19
ENSG00000182481	KPNA2	karyopherin subunit alpha 2	chr17	0.512984	8.5946	1
ENSG00000096696	DSP	desmoplakin	chr6	-3.01612	7.58026	9.4e-39
ENSG00000113361	CDH6	cadherin 6	chr5	3.07819	7.97524	4.81e-33
ENSG00000120738	EGR1	early growth response 1	chr5	0.126374	7.92299	1
ENSG00000137460	FHDC1	FH2 domain containing 1	chr4	4.55078	7.85524	2.1e-76
ENSG00000175899	A2M	alpha-2-macroglobulin	chr12	0.0137402	7.94629	1
ENSG00000130816	DNMT1	DNA methyltransferase 1	chr19	1.06036	8.60522	0.936766
ENSG00000146112	PPP1R18	protein phosphatase 1 regulatory subunit 18	chr6_dbb_hap3	1.69031	8.74604	1.71e-09
ENSG00000106484	MEST	mesoderm specific transcript	chr7	-2.64437	7.86894	1.23e-44
ENSG00000118193	KIF14	kinesin family member 14	chr1	0.267124	7.57313	1
ENSG00000076641	PAG1	phosphoprotein membrane anchor with glycosphingolipid microdomains 1	chr8	3.14531	7.79546	1.28e-28
ENSG00000142945	KIF2C	kinesin family member 2C	chr1	0.700106	7.55235	1
ENSG00000147257	GPC3	glypican 3	chrX	-3.41289	7.50458	3.19e-58
ENSG00000054654	SYNE2	spectrin repeat containing nuclear envelope protein 2	chr14	1.19571	8.61481	0.122168
ENSG00000156970	BUB1B	BUB1 mitotic checkpoint serine/threonine kinase B	chr15	0.42007	7.69045	1
ENSG00000108821	COL1A1	collagen type I alpha 1 chain	chr17	0.0866196	7.7333	1
ENSG00000121966	CXCR4	C-X-C motif chemokine receptor 4	chr2	1.91867	7.88629	6.41e-08
ENSG00000272398	CD24	CD24 molecule	chrY	-0.576462	8.0375	1
ENSG00000118762	PKD2	polycystin 2, transient receptor potential cation channel	chr4	1.57242	8.39943	1.58e-05
ENSG00000186480	INSIG1	insulin induced gene 1	chr7	-0.688354	8.34994	1
ENSG00000269028	MTRNR2L2	MT-RNR2-like 2	chr5	0.203851	12.6769	1
ENSG00000138434	SSFA2	sperm specific antigen 2	chr2	2.09806	8.27238	5.14e-18
ENSG00000237412	PRSS56	protease, serine 56	chr2	0.371552	8.20962	1
ENSG00000117399	CDC20	cell division cycle 20	chr1	0.203576	7.59452	1
ENSG00000136108	CKAP2	cytoskeleton associated protein 2	chr13	0.552683	8.28859	1
ENSG00000104368	PLAT	plasminogen activator, tissue type	chr8	1.57754	8.25037	2.41e-05
ENSG00000171848	RRM2	ribonucleotide reductase regulatory subunit M2	chr2	0.990146	7.73465	1
ENSG00000114346	ECT2	epithelial cell transforming 2	chr3	0.0878081	7.63533	1
ENSG00000072110	ACTN1	actinin alpha 1	chr14	-0.825154	8.46576	1
ENSG00000129757	CDKN1C	cyclin dependent kinase inhibitor 1C	chr11	-2.29103	7.83753	2.05e-18
ENSG00000167553	TUBA1C	tubulin alpha 1c	chr12	-0.993594	8.48415	1
ENSG00000269821	KCNQ1OT1	KCNQ1 opposite strand/antisense transcript 1 (non-protein coding)	NA	-0.820738	9.75605	1
ENSG00000136160	EDNRB	endothelin receptor type B	chr13	3.9159	7.82888	1.56e-58
ENSG00000072571	HMMR	hyaluronan mediated motility receptor	chr5	0.316076	7.52604	1
ENSG00000129657	SEC14L1	SEC14 like lipid binding 1	chr17	0.457029	8.70988	1
ENSG00000114200	BCHE	butyrylcholinesterase	chr3	1.07839	8.44385	0.787665
ENSG00000137267	TUBB2A	tubulin beta 2A class IIa	chr6	-2.01812	8.42486	7.92e-27
ENSG00000011426	ANLN	anillin actin binding protein	chr7	0.689272	7.6466	1
ENSG00000119969	HELLS	helicase, lymphoid-specific	chr10	0.891558	8.30894	1
ENSG00000125398	SOX9	SRY-box 9	chr17	-1.81146	7.67862	4.97e-06
ENSG00000181449	SOX2	SRY-box 2	chr3	-0.938215	8.36492	1
ENSG00000168542	MIR3606	microRNA 3606	NA	-3.6761	7.22312	3.86e-34
ENSG00000166508	MCM7	minichromosome maintenance complex component 7	chr7	1.26071	8.16668	0.0786651
ENSG00000068489	PRR11	proline rich 11	chr17	0.0861335	8.02307	1
ENSG00000091136	LAMB1	laminin subunit beta 1	chr7	1.4377	9.18509	3.12e-06
ENSG00000008196	TFAP2B	transcription factor AP-2 beta	chr6	0.0936821	10.1932	1
ENSG00000090889	KIF4A	kinesin family member 4A	chrX	-0.134561	7.53103	1
ENSG00000143162	CREG1	cellular repressor of E1A stimulated genes 1	chr1	-1.74332	8.06511	2.03e-08
ENSG00000112414	ADGRG6	adhesion G protein-coupled receptor G6	chr6	2.01727	8.19175	1.8e-15
ENSG00000118257	NRP2	neuropilin 2	chr2	-0.50139	8.80472	1
ENSG00000255823	MTRNR2L8	MT-RNR2-like 8	chr11	0.159984	12.2148	1
ENSG00000113389	NPR3	natriuretic peptide receptor 3	chr5	4.16231	7.48903	1.41e-41
ENSG00000172201	ID4	inhibitor of DNA binding 4, HLH protein	chr6	2.99249	7.52947	5.29e-21
ENSG00000157456	CCNB2	cyclin B2	chr15	-0.224645	7.71008	1
ENSG00000163535	SGO2	shugoshin 2	chr2	0.626627	7.46328	1
ENSG00000228716	DHFR	dihydrofolate reductase	chr5	1.00823	8.23916	1
ENSG00000111961	SASH1	SAM and SH3 domain containing 1	chr6	1.92281	8.58683	1.16e-16
ENSG00000106004	HOXA5	homeobox A5	chr7	-1.47816	7.75916	0.00122202
ENSG00000109929	SC5D	sterol-C5-desaturase	chr11	-0.771196	8.51043	1
ENSG00000174607	UGT8	UDP glycosyltransferase 8	chr4	-2.25524	7.76691	2.3e-23
ENSG00000010292	NCAPD2	non-SMC condensin I complex subunit D2	chr12	0.256178	8.15323	1
ENSG00000077782	FGFR1	fibroblast growth factor receptor 1	chr8	-1.49963	7.95221	7.73e-05
ENSG00000234745	HLA-B	major histocompatibility complex, class I, B	chr6_qbl_hap6	0.624825	8.24473	1
ENSG00000133812	SBF2	SET binding factor 2	chr11	-0.209382	8.48913	1
ENSG00000184160	ADRA2C	adrenoceptor alpha 2C	chr4	-3.12519	7.23712	2.43e-25
ENSG00000145794	MEGF10	multiple EGF like domains 10	chr5	3.29475	7.85619	3.35e-45
ENSG00000169679	BUB1	BUB1 mitotic checkpoint serine/threonine kinase	chr2	0.164442	7.50149	1
ENSG00000142669	SH3BGRL3	SH3 domain binding glutamate rich protein like 3	chr1	-1.28183	7.94024	0.0506368
ENSG00000183779	ZNF703	zinc finger protein 703	chr8	-1.7253	8.06212	7.59e-10
ENSG00000204843	DCTN1	dynactin subunit 1	chr2	0.773496	8.8612	1
ENSG00000052802	MSMO1	methylsterol monooxygenase 1	chr4	-0.486542	9.5276	1
ENSG00000198910	L1CAM	L1 cell adhesion molecule	chrX	0.55935	8.5139	1
ENSG00000174721	FGFBP3	fibroblast growth factor binding protein 3	chr10	0.0398623	9.99293	1
ENSG00000075218	GTSE1	G2 and S-phase expressed 1	chr22	0.50171	7.54122	1
ENSG00000164318	EGFLAM	EGF like, fibronectin type III and laminin G domains	chr5	1.74781	8.22549	9.97e-10
ENSG00000130203	APOE	apolipoprotein E	chr19	-0.85176	7.78638	1
ENSG00000165475	CRYL1	crystallin lambda 1	chr13	1.75454	7.82662	2.53e-06
ENSG00000275342	PRAG1	PEAK1 related kinase activating pseudokinase 1	chr8	1.9098	7.7314	4.41e-07
ENSG00000072501	SMC1A	structural maintenance of chromosomes 1A	chrX	0.433667	8.36323	1
ENSG00000171206	TRIM8	tripartite motif containing 8	chr10	-1.75334	8.06305	7.78e-11
ENSG00000179195	ZNF664	zinc finger protein 664	chr12	0.937246	8.65257	1
ENSG00000142089	IFITM3	interferon induced transmembrane protein 3	chr11	-1.32034	8.0731	0.0121204
ENSG00000076706	MIR6756	microRNA 6756	NA	4.50504	7.60167	6.88e-59
ENSG00000140451	PIF1	PIF1 5'-to-3' DNA helicase	chr15	0.60348	7.37113	1
ENSG00000080822	CLDND1	claudin domain containing 1	chr3	1.04237	8.44634	1
ENSG00000154096	THY1	Thy-1 cell surface antigen	chr11	2.18071	7.74853	1.37e-12
ENSG00000187140	FOXD3	forkhead box D3	chr1	1.57072	8.25441	4.18e-06
ENSG00000140718	FTO	FTO, alpha-ketoglutarate dependent dioxygenase	chr16	0.851392	8.07592	1
ENSG00000104738	MCM4	minichromosome maintenance complex component 4	chr8	1.33663	7.51113	0.0941035
ENSG00000138160	KIF11	kinesin family member 11	chr10	0.326865	7.56492	1
ENSG00000105341	ATP5SL	ATP5S like	chr19	0.622056	8.16638	1
ENSG00000170542	SERPINB9	serpin family B member 9	chr6	4.38431	7.40095	6.3e-45
ENSG00000123485	HJURP	Holliday junction recognition protein	chr2	1.45941	7.29631	0.0599353
ENSG00000135451	TROAP	trophinin associated protein	chr12	0.418918	7.58524	1
ENSG00000168209	DDIT4	DNA damage inducible transcript 4	chr10	-0.962575	7.91424	1
ENSG00000132854	KANK4	KN motif and ankyrin repeat domains 4	chr1	3.83884	7.61199	1.73e-46
ENSG00000120802	TMPO	thymopoietin	chr12	0.181163	8.51975	1
ENSG00000107438	PDLIM1	PDZ and LIM domain 1	chr10	1.93843	7.6188	2.38e-07
ENSG00000159167	STC1	stanniocalcin 1	chr8	-4.94673	7.12036	2.07e-98
ENSG00000170315	UBB	ubiquitin B	chr17	0.571596	9.26817	1
ENSG00000171551	ECEL1	endothelin converting enzyme like 1	chr2	-0.549272	7.67197	1
ENSG00000145687	SSBP2	single stranded DNA binding protein 2	chr5	-1.56311	8.25873	4.18e-08
ENSG00000132646	PCNA	proliferating cell nuclear antigen	chr20	0.898647	7.5756	1
ENSG00000178695	KCTD12	potassium channel tetramerization domain containing 12	chr13	2.73811	7.22173	3.36e-11
ENSG00000185189	MIR6845	microRNA 6845	NA	1.25243	7.82721	0.120004
ENSG00000106333	PCOLCE	procollagen C-endopeptidase enhancer	chr7	-2.78616	7.24865	2.36e-20
ENSG00000265972	TXNIP	thioredoxin interacting protein	chr1	-0.375147	9.02577	1
ENSG00000134954	ETS1	ETS proto-oncogene 1, transcription factor	chr11	2.1	7.8779	1.15e-13
ENSG00000161547	SRSF2	serine and arginine rich splicing factor 2	chr17	0.394811	8.99914	1
ENSG00000157870	FAM213B	family with sequence similarity 213 member B	chr1	0.867995	7.46621	1
ENSG00000144354	CDCA7	cell division cycle associated 7	chr2	1.48752	7.62097	0.00487442
ENSG00000137807	KIF23	kinesin family member 23	chr15	0.628669	7.38688	1
ENSG00000226258	GRM7-AS3	GRM7 antisense RNA 3	NA	-4.21325	7.01505	2.59e-39
ENSG00000128713	HOXD11	homeobox D11	chr2	-4.07024	7.1628	1.32e-75
ENSG00000164611	PTTG1	pituitary tumor-transforming 1	chr5	-0.0724934	7.65349	1
ENSG00000188042	ARL4C	ADP ribosylation factor like GTPase 4C	chr2	-3.59133	7.29789	1.26e-64
ENSG00000123416	TUBA1B	tubulin alpha 1b	chr12	0.171785	11.8465	1
ENSG00000166889	PATL1	PAT1 homolog 1, processing body mRNA decay factor	chr11	0.946646	7.91329	1
ENSG00000158887	MPZ	myelin protein zero	chr1	4.65039	7.69237	1.23e-76
ENSG00000164733	CTSB	cathepsin B	chr8	-1.54747	8.16382	2.59e-06
ENSG00000035403	VCL	vinculin	chr10	-1.56598	8.32377	8.24e-08
ENSG00000164109	MAD2L1	mitotic arrest deficient 2 like 1	chr4	1.00012	7.51369	1
ENSG00000135069	PSAT1	phosphoserine aminotransferase 1	chr9	0.841759	8.4176	1
ENSG00000154639	CXADR	coxsackie virus and adenovirus receptor	chr21	-2.68008	7.32846	5.84e-25
ENSG00000149547	EI24	EI24, autophagy associated transmembrane protein	chr11	0.720291	8.73162	1
ENSG00000130508	PXDN	peroxidasin	chr2	0.0936615	8.80267	1
ENSG00000180818	HOXC10	homeobox C10	chr12	-0.726406	8.22466	1
ENSG00000144485	HES6	hes family bHLH transcription factor 6	chr2	1.95986	7.98577	4.23e-13
ENSG00000188486	H2AFX	H2A histone family member X	chr11	0.68166	7.53495	1
ENSG00000076003	MCM6	minichromosome maintenance complex component 6	chr2	0.765734	7.59808	1
ENSG00000137812	KNL1	kinetochore scaffold 1	chr15	0.208459	7.36739	1
ENSG00000276644	DACH1	dachshund family transcription factor 1	chr13	-3.15571	7.1641	5.61e-28
ENSG00000171208	NETO2	neuropilin and tolloid like 2	chr16	2.08492	7.78443	3.01e-12
ENSG00000072832	CRMP1	collapsin response mediator protein 1	chr4	1.68882	8.28921	1.27e-09
ENSG00000101333	PLCB4	phospholipase C beta 4	chr20	0.927262	8.55105	1
ENSG00000105974	CAV1	caveolin 1	chr7	3.26872	7.12686	1.94e-16
ENSG00000112742	TTK	TTK protein kinase	chr6	0.639515	7.30143	1
ENSG00000185565	LSAMP	limbic system-associated membrane protein	chr3	1.39241	8.36144	0.000890277
ENSG00000276203	ANKRD20A3	ankyrin repeat domain 20 family member A3	chr9	2.81048	7.41791	2.24e-17
ENSG00000164161	HHIP	hedgehog interacting protein	chr4	-3.35978	7.21197	5.83e-42
ENSG00000196586	MYO6	myosin VI	chr6	1.19257	8.09557	0.18267
ENSG00000277586	NEFL	neurofilament light	chr8	-3.11603	7.20158	1.85e-32
ENSG00000250337	LINC01021	long intergenic non-protein coding RNA 1021	NA	-0.293176	7.52766	1
ENSG00000175216	CKAP5	cytoskeleton associated protein 5	chr11	-0.137898	8.33629	1
ENSG00000143320	CRABP2	cellular retinoic acid binding protein 2	chr1	1.12093	9.88767	0.25152
ENSG00000024526	DEPDC1	DEP domain containing 1	chr1	0.161789	7.29836	1
ENSG00000170275	CRTAP	cartilage associated protein	chr3	1.32044	9.46913	0.000447892
ENSG00000130707	ASS1	argininosuccinate synthase 1	chr9	-3.95486	7.13281	2.72e-67
ENSG00000105290	APLP1	amyloid beta precursor like protein 1	chr19	0.547858	7.83422	1
ENSG00000275832	ARHGAP23	Rho GTPase activating protein 23	chr17	1.10353	7.57319	0.713882
ENSG00000148737	TCF7L2	transcription factor 7 like 2	chr10	1.40922	8.41187	0.000522996
ENSG00000172893	DHCR7	7-dehydrocholesterol reductase	chr11	-0.260646	8.23204	1
ENSG00000165732	DDX21	DExD-box helicase 21	chr10	0.738441	8.24616	1
ENSG00000175063	UBE2C	ubiquitin conjugating enzyme E2 C	chr20	0.743364	7.37926	1
ENSG00000046653	GPM6B	glycoprotein M6B	chrX	2.13624	7.8116	1.08e-14
ENSG00000011021	CLCN6	chloride voltage-gated channel 6	chr1	0.134569	8.02227	1
ENSG00000182263	FIGN	fidgetin, microtubule severing factor	chr2	1.34946	8.81684	0.00023788
ENSG00000064309	CDON	cell adhesion associated, oncogene regulated	chr11	-2.76877	7.34835	2.22e-29
ENSG00000080986	NDC80	NDC80, kinetochore complex component	chr18	0.534973	7.24808	1
ENSG00000205035	LOC440040	glutamate metabotropic receptor 5 pseudogene	chr11	3.7658	7.05577	8.73e-24
ENSG00000163359	COL6A3	collagen type VI alpha 3 chain	chr2	-4.06182	7.0833	2.15e-67
ENSG00000134222	PSRC1	proline and serine rich coiled-coil 1	chr1	0.164766	7.46459	1
ENSG00000143228	NUF2	NUF2, NDC80 kinetochore complex component	chr1	0.29309	7.34675	1
ENSG00000173068	BNC2	basonuclin 2	chr9	1.11712	7.63271	0.606483
ENSG00000103187	COTL1	coactosin like F-actin binding protein 1	chr16	-1.0159	8.32528	1
ENSG00000120075	HOXB5	homeobox B5	chr17	-0.395876	8.0143	1
ENSG00000154310	TNIK	TRAF2 and NCK interacting kinase	chr3	0.839376	8.23465	1
ENSG00000169439	SDC2	syndecan 2	chr8	-2.30121	7.43197	6.56e-18
ENSG00000139679	LPAR6	lysophosphatidic acid receptor 6	chr13	1.49605	7.42949	0.00906676
ENSG00000139289	PHLDA1	pleckstrin homology like domain family A member 1	chr12	1.43006	7.68753	0.0083761
ENSG00000074590	NUAK1	NUAK family kinase 1	chr12	-0.977691	7.75731	1
ENSG00000164032	H2AFZ	H2A histone family member Z	chr4	-0.166854	8.78109	1
ENSG00000187951	LOC100288637	OTU deubiquitinase 7A pseudogene	NA	0.84201	7.32739	1
ENSG00000075213	SEMA3A	semaphorin 3A	chr7	-3.22284	7.17496	1.09e-40
ENSG00000166165	CKB	creatine kinase B	chr14	-0.398128	7.78837	1
ENSG00000151835	SACS	sacsin molecular chaperone	chr13	1.0348	8.70378	1
ENSG00000132688	NES	nestin	chr1	-1.02173	8.40564	1
ENSG00000060718	COL11A1	collagen type XI alpha 1 chain	chr1	-0.917915	8.61469	1
ENSG00000078399	HOXA9	homeobox A9	chr7	-0.653991	8.16814	1
ENSG00000140525	FANCI	Fanconi anemia complementation group I	chr15	0.712573	7.52217	1
ENSG00000141258	SGSM2	small G protein signaling modulator 2	chr17	0.680458	8.12558	1
ENSG00000137831	UACA	uveal autoantigen with coiled-coil domains and ankyrin repeats	chr15	1.35309	8.14336	0.00452348
ENSG00000118412	CASP8AP2	caspase 8 associated protein 2	chr6	0.993963	7.72409	1
ENSG00000116039	ATP6V1B1	ATPase H+ transporting V1 subunit B1	chr2	-4.13865	7.00245	4.7e-56
ENSG00000185591	SP1	Sp1 transcription factor	chr12	0.924273	8.17605	1
ENSG00000140416	TPM1	tropomyosin 1 (alpha)	chr15	-2.11443	7.34716	3.18e-11
ENSG00000110092	CCND1	cyclin D1	chr11	0.772348	8.13876	1
ENSG00000139800	ZIC5	Zic family member 5	chr13	-4.69215	7.07706	1.4e-112
ENSG00000185033	SEMA4B	semaphorin 4B	chr15	0.815115	7.22462	1
ENSG00000081479	LRP2	LDL receptor related protein 2	chr2	3.61591	7.36324	3.47e-32
ENSG00000197757	HOXC6	homeobox C6	chr12	-1.27446	7.7087	0.0596913
ENSG00000087586	AURKA	aurora kinase A	chr20	0.104643	7.25656	1
ENSG00000143878	RHOB	ras homolog family member B	chr2	1.61496	8.10322	1.49e-06
ENSG00000117650	NEK2	NIMA related kinase 2	chr1	0.366583	7.13092	1
ENSG00000139318	DUSP6	dual specificity phosphatase 6	chr12	0.355377	7.83647	1
ENSG00000116962	NID1	nidogen 1	chr1	1.36597	8.37055	0.00100907
ENSG00000145147	SLIT2	slit guidance ligand 2	chr4	-3.07102	7.18799	3.49e-29
ENSG00000256618	MTRNR2L1	MT-RNR2-like 1	chr17	1.98155	7.99966	4.46e-13
ENSG00000162878	PKDCC	protein kinase domain containing, cytoplasmic	chr2	-1.41518	7.83	0.00229605
ENSG00000111371	SLC38A1	solute carrier family 38 member 1	chr12	-1.2341	7.7474	0.0813677
ENSG00000102265	TIMP1	TIMP metallopeptidase inhibitor 1	chrX	-0.458592	7.96725	1
ENSG00000092853	CLSPN	claspin	chr1	1.46929	7.34874	0.0171911
ENSG00000143368	SF3B4	splicing factor 3b subunit 4	chr1	1.20972	8.04441	0.125816
ENSG00000182492	BGN	biglycan	chrX	-1.67081	7.51824	1.8e-05
ENSG00000113161	HMGCR	3-hydroxy-3-methylglutaryl-CoA reductase	chr5	-0.396851	9.09547	1
ENSG00000136504	KAT7	lysine acetyltransferase 7	chr17	1.8371	7.86376	4.82e-09
ENSG00000187231	SESTD1	SEC14 and spectrin domain containing 1	chr2	-0.727517	8.07236	1
ENSG00000182175	RGMA	repulsive guidance molecule family member a	chr15	-3.04124	7.22206	2.27e-40
ENSG00000137936	BCAR3	breast cancer anti-estrogen resistance 3	chr1	1.51048	7.61844	0.00146393
ENSG00000163558	PRKCI	protein kinase C iota	chr3	1.39783	7.87736	0.0056842
ENSG00000091409	ITGA6	integrin subunit alpha 6	chr2	2.37063	7.74631	1.3e-18
ENSG00000189067	LITAF	lipopolysaccharide induced TNF factor	chr16	1.36325	8.37333	0.000781833
ENSG00000134333	LDHA	lactate dehydrogenase A	chr11	0.453734	7.57996	1
ENSG00000198743	SLC5A3	solute carrier family 5 member 3	chr21	-1.58451	7.94257	4.09e-07
ENSG00000112118	MCM3	minichromosome maintenance complex component 3	chr6	0.882809	7.66578	1
ENSG00000115204	MPV17	MPV17, mitochondrial inner membrane protein	chr2	0.790776	7.89105	1
ENSG00000071991	CDH19	cadherin 19	chr18	3.93245	7.1862	3.57e-32
ENSG00000125266	EFNB2	ephrin B2	chr13	-0.714796	7.8831	1
ENSG00000134186	PRPF38B	pre-mRNA processing factor 38B	chr1	0.783473	8.59744	1
ENSG00000100297	MCM5	minichromosome maintenance complex component 5	chr22	1.31475	7.38776	0.102932
ENSG00000019549	SNAI2	snail family transcriptional repressor 2	chr8	-1.93888	7.1144	8.67e-06
ENSG00000177606	JUN	Jun proto-oncogene, AP-1 transcription factor subunit	chr1	1.35317	7.38888	0.0722461
ENSG00000196569	LAMA2	laminin subunit alpha 2	chr6	-3.36473	6.94814	6.36e-27
ENSG00000166582	CENPV	centromere protein V	chr17	1.76099	8.02349	1.19e-09
ENSG00000181467	RAP2B	RAP2B, member of RAS oncogene family	chr3	1.29591	7.49006	0.102621
ENSG00000112029	FBXO5	F-box protein 5	chr6	0.949435	7.33426	1
ENSG00000151012	SLC7A11	solute carrier family 7 member 11	chr4	-1.8052	7.33353	3.5e-06
ENSG00000076382	SPAG5	sperm associated antigen 5	chr17	0.124652	7.40925	1
ENSG00000154473	BUB3	BUB3, mitotic checkpoint protein	chr10	0.764228	7.95639	1
ENSG00000162545	CAMK2N1	calcium/calmodulin dependent protein kinase II inhibitor 1	chr1	2.88136	7.3618	1.35e-19
ENSG00000213585	VDAC1	voltage dependent anion channel 1	chr5	0.821186	8.94427	1
ENSG00000128709	HOXD9	homeobox D9	chr2	-3.85111	7.06828	2.13e-66
ENSG00000164125	FAM198B	family with sequence similarity 198 member B	chr4	3.81079	7.16609	2.11e-29
ENSG00000169607	CKAP2L	cytoskeleton associated protein 2 like	chr2	0.619283	7.18898	1
ENSG00000114315	HES1	hes family bHLH transcription factor 1	chr3	-0.142005	7.6203	1
ENSG00000021826	CPS1	carbamoyl-phosphate synthase 1	chr2	0.288908	7.36577	1
ENSG00000077044	DGKD	diacylglycerol kinase delta	chr2	-1.56102	7.75639	6.99e-06
ENSG00000129195	PIMREG	PICALM interacting mitotic regulator	chr17	0.210377	7.22044	1
ENSG00000064666	CNN2	calponin 2	chr19	-1.20692	7.97204	0.0843672
ENSG00000100075	SLC25A1	solute carrier family 25 member 1	chr22	0.356316	8.60704	1
ENSG00000173208	ABCD2	ATP binding cassette subfamily D member 2	chr12	-4.15081	6.8705	4.01e-53
ENSG00000153707	PTPRD	protein tyrosine phosphatase, receptor type D	chr9	-2.38016	7.39615	8.01e-25
ENSG00000234420	ZNF37BP	zinc finger protein 37B, pseudogene	NA	1.49489	8.15873	1.95e-05
ENSG00000167552	TUBA1A	tubulin alpha 1a	chr12	-0.198176	11.1572	1
ENSG00000163520	FBLN2	fibulin 2	chr3	-3.56815	7.10768	2.12e-57
ENSG00000154945	ANKRD40	ankyrin repeat domain 40	chr17	1.01597	7.73334	1
ENSG00000185650	ZFP36L1	ZFP36 ring finger protein like 1	chr14	-0.277737	9.62356	1
ENSG00000184661	CDCA2	cell division cycle associated 2	chr8	0.665679	7.21283	1
ENSG00000223417	TRIM49D1	tripartite motif containing 49D1	NA	3.53431	6.97474	2.02e-21
ENSG00000144224	UBXN4	UBX domain protein 4	chr2	0.533648	8.72485	1
ENSG00000176788	BASP1	brain abundant membrane attached signal protein 1	chr5	-1.00692	8.2385	1
ENSG00000176014	TUBB6	tubulin beta 6 class V	chr18	-0.24907	7.6926	1
ENSG00000136378	ADAMTS7	ADAM metallopeptidase with thrombospondin type 1 motif 7	chr15	1.1153	7.787	0.536577
ENSG00000106070	GRB10	growth factor receptor bound protein 10	chr7	-0.277142	7.78811	1
ENSG00000099194	SCD	stearoyl-CoA desaturase	chr10	-0.543499	10.4719	1
ENSG00000120437	ACAT2	acetyl-CoA acetyltransferase 2	chr6	-0.194817	8.48013	1
ENSG00000168411	RFWD3	ring finger and WD repeat domain 3	chr16	0.787655	7.62889	1
ENSG00000198826	ARHGAP11A	Rho GTPase activating protein 11A	chr15	0.268587	7.29949	1
ENSG00000089685	BIRC5	baculoviral IAP repeat containing 5	chr17	0.0474739	7.3585	1
ENSG00000102317	RBM3	RNA binding motif (RNP1, RRM) protein 3	chrX	0.640932	8.69017	1
ENSG00000180357	ZNF609	zinc finger protein 609	chr15	0.087483	8.05797	1
ENSG00000117643	MAN1C1	mannosidase alpha class 1C member 1	chr1	-0.534112	7.58776	1
ENSG00000156802	ATAD2	ATPase family, AAA domain containing 2	chr8	0.650801	7.4156	1
ENSG00000048540	LMO3	LIM domain only 3	chr12	-1.10634	7.28992	0.718208
ENSG00000149532	CPSF7	cleavage and polyadenylation specific factor 7	chr11	1.03519	8.10059	1
ENSG00000135476	ESPL1	extra spindle pole bodies like 1, separase	chr12	0.682054	7.16631	1
ENSG00000164292	RHOBTB3	Rho related BTB domain containing 3	chr5	1.18809	8.71004	0.0839726
ENSG00000169710	FASN	fatty acid synthase	chr17	0.113238	9.92514	1
ENSG00000129534	MIS18BP1	MIS18 binding protein 1	chr14	0.471842	7.49097	1
ENSG00000204335	SP5	Sp5 transcription factor	chr2	-1.66928	7.30466	0.000123451
ENSG00000104331	IMPAD1	inositol monophosphatase domain containing 1	chr8	0.675208	7.74078	1
ENSG00000189060	H1F0	H1 histone family member 0	chr22	0.0861856	7.03003	1
ENSG00000129244	ATP1B2	ATPase Na+/K+ transporting subunit beta 2	chr17	0.0904245	8.31219	1
ENSG00000053254	FOXN3	forkhead box N3	chr14	1.04113	8.11981	0.994023
ENSG00000089737	DDX24	DEAD-box helicase 24	chr14	0.722049	8.0764	1
ENSG00000117114	ADGRL2	adhesion G protein-coupled receptor L2	chr1	-0.170216	8.01333	1
ENSG00000146938	NLGN4X	neuroligin 4, X-linked	chrX	0.399725	7.67315	1
ENSG00000187735	TCEA1	transcription elongation factor A1	chr8	0.714498	8.63993	1
ENSG00000105939	ZC3HAV1	zinc finger CCCH-type containing, antiviral 1	chr7	1.36709	7.27499	0.0849042
ENSG00000170961	HAS2	hyaluronan synthase 2	chr8	0.391254	7.3884	1
ENSG00000184486	POU3F2	POU class 3 homeobox 2	chr6	-3.59444	6.95562	2.49e-40
ENSG00000104976	SNAPC2	small nuclear RNA activating complex polypeptide 2	chr19	1.35973	7.34752	0.0540414
ENSG00000134690	CDCA8	cell division cycle associated 8	chr1	0.18694	7.29394	1
ENSG00000172014	ANKRD20A4	ankyrin repeat domain 20 family member A4	chr9	2.50057	7.24166	5.43e-12
ENSG00000170689	HOXB9	homeobox B9	chr17	-0.0603232	9.19092	1
ENSG00000141639	MAPK4	mitogen-activated protein kinase 4	chr18	-2.77436	7.11019	2.08e-23
ENSG00000176444	CLK2	CDC like kinase 2	chr1	0.340409	7.84371	1
ENSG00000141449	GREB1L	growth regulation by estrogen in breast cancer 1 like	chr18	-1.64651	7.42511	4.49e-05
ENSG00000106615	RHEB	Ras homolog enriched in brain	chr7	0.933411	8.05967	1
ENSG00000089289	IGBP1	immunoglobulin binding protein 1	chrX	0.983169	7.90333	1
ENSG00000120093	HOXB3	homeobox B3	chr17	-1.25333	7.71169	0.0667458
ENSG00000152284	TCF7L1	transcription factor 7 like 1	chr2	0.0346451	8.81355	1
ENSG00000128045	RASL11B	RAS like family 11 member B	chr4	-2.47375	7.01983	2.02e-12
ENSG00000112759	SLC29A1	solute carrier family 29 member 1 (Augustine blood group)	chr6	0.998418	7.4737	1
ENSG00000156990	RPUSD3	RNA pseudouridylate synthase domain containing 3	chr3	1.12533	7.52763	0.536335
ENSG00000105281	SLC1A5	solute carrier family 1 member 5	chr19	1.41731	7.62208	0.00695622
ENSG00000196876	SCN8A	sodium voltage-gated channel alpha subunit 8	chr12	-2.23858	7.28376	3.73e-16
ENSG00000125046	SSUH2	ssu-2 homolog (C. elegans)	chr3	3.37868	6.97339	2.85e-19
ENSG00000172020	GAP43	growth associated protein 43	chr3	0.557498	7.3713	1
ENSG00000153339	TRAPPC8	trafficking protein particle complex 8	chr18	0.314189	7.59331	1
ENSG00000105821	DNAJC2	DnaJ heat shock protein family (Hsp40) member C2	chr7	0.849929	7.49467	1
ENSG00000112290	WASF1	WAS protein family member 1	chr6	-0.791511	7.64715	1
ENSG00000145675	PIK3R1	phosphoinositide-3-kinase regulatory subunit 1	chr5	-0.0584198	8.73282	1
ENSG00000173786	CNP	2',3'-cyclic nucleotide 3' phosphodiesterase	chr17	1.64865	8.40846	3.41e-10
ENSG00000139354	GAS2L3	growth arrest specific 2 like 3	chr12	1.70468	7.31408	0.000292416
ENSG00000164211	STARD4	StAR related lipid transfer domain containing 4	chr5	-1.23762	7.7365	0.0708398
ENSG00000148218	ALAD	aminolevulinate dehydratase	chr9	0.564345	7.31336	1
ENSG00000166181	API5	apoptosis inhibitor 5	chr11	1.04621	7.98673	0.959042
ENSG00000255717	SNHG1	small nucleolar RNA host gene 1	NA	0.707422	8.87946	1
ENSG00000106571	GLI3	GLI family zinc finger 3	chr7	0.987679	8.78854	1
ENSG00000136824	SMC2	structural maintenance of chromosomes 2	chr9	0.842242	7.59438	1
ENSG00000211460	TSN	translin	chr2	1.06385	8.53687	0.748008
ENSG00000124942	AHNAK	AHNAK nucleoprotein	chr11	-1.78863	7.08783	0.000183734
ENSG00000204899	MZT1	mitotic spindle organizing protein 1	chr13	0.0746784	7.38475	1
ENSG00000108106	UBE2S	ubiquitin conjugating enzyme E2 S	chr19	-0.529408	7.68383	1
ENSG00000139219	COL2A1	collagen type II alpha 1 chain	chr12	0.0411305	9.316	1
ENSG00000136044	APPL2	adaptor protein, phosphotyrosine interacting with PH domain and leucine zipper 2	chr12	0.939251	7.88988	1
ENSG00000183148	ANKRD20A2	ankyrin repeat domain 20 family member A2	NA	2.6331	7.198	2.24e-13
ENSG00000167528	ZNF641	zinc finger protein 641	chr12	0.457707	7.39773	1
ENSG00000138795	LEF1	lymphoid enhancer binding factor 1	chr4	-0.512006	8.27656	1
ENSG00000092140	G2E3	G2/M-phase specific E3 ubiquitin protein ligase	chr14	0.651	7.53127	1
ENSG00000103647	CORO2B	coronin 2B	chr15	1.81363	7.25894	4.45e-05
ENSG00000123983	ACSL3	acyl-CoA synthetase long-chain family member 3	chr2	-1.07123	8.2742	0.653718
ENSG00000260691	ANKRD20A1	ankyrin repeat domain 20 family member A1	NA	2.59679	7.19528	5.88e-13
ENSG00000134369	NAV1	neuron navigator 1	chr1	0.541217	7.95292	1
ENSG00000168005	C11orf84	chromosome 11 open reading frame 84	chr11	1.36277	7.8767	0.0076814
ENSG00000132692	BCAN	brevican	chr1	2.85246	6.92707	3.79e-11
ENSG00000168496	FEN1	flap structure-specific endonuclease 1	chr11	0.729248	7.23624	1
ENSG00000086232	EIF2AK1	eukaryotic translation initiation factor 2 alpha kinase 1	chr7	0.0915166	8.29337	1
ENSG00000162458	FBLIM1	filamin binding LIM protein 1	chr1	-0.665288	7.26169	1
ENSG00000132604	TERF2	telomeric repeat binding factor 2	chr16	0.58856	7.58074	1
ENSG00000153885	KCTD15	potassium channel tetramerization domain containing 15	chr19	1.17323	7.38152	0.352009
ENSG00000148468	FAM171A1	family with sequence similarity 171 member A1	chr10	0.297326	8.03669	1
ENSG00000109814	UGDH	UDP-glucose 6-dehydrogenase	chr4	0.988963	8.26446	1
ENSG00000114302	PRKAR2A	protein kinase cAMP-dependent type II regulatory subunit alpha	chr3	0.609412	8.42502	1
ENSG00000234224	TMEM229A	transmembrane protein 229A	chr7	1.71737	7.96954	1.23e-08
ENSG00000197451	HNRNPAB	heterogeneous nuclear ribonucleoprotein A/B	chr5	1.01761	8.72007	1
ENSG00000164068	RNF123	ring finger protein 123	chr3	1.32301	7.38815	0.0695445
ENSG00000129116	PALLD	palladin, cytoskeletal associated protein	chr4	-1.51787	7.67563	3.02e-05
ENSG00000092964	DPYSL2	dihydropyrimidinase like 2	chr8	-1.37225	7.60665	0.00373839
ENSG00000251562	MALAT1	metastasis associated lung adenocarcinoma transcript 1 (non-protein coding)	chr11	0.188147	12.8442	1
ENSG00000103423	DNAJA3	DnaJ heat shock protein family (Hsp40) member A3	chr16	0.591213	7.2938	1
ENSG00000102024	PLS3	plastin 3	chrX	1.52796	8.49187	2.65e-08
ENSG00000177426	TGIF1	TGFB induced factor homeobox 1	chr18	0.704591	7.44944	1
ENSG00000164199	ADGRV1	adhesion G protein-coupled receptor V1	chr5	-2.03092	7.35673	1.08e-12
ENSG00000136960	ENPP2	ectonucleotide pyrophosphatase/phosphodiesterase 2	chr8	2.158	7.64007	8.37e-14
ENSG00000170017	ALCAM	activated leukocyte cell adhesion molecule	chr3	-1.51774	7.25608	0.002706
ENSG00000275052	PPP4R3B	protein phosphatase 4 regulatory subunit 3B	chr2	0.358749	8.00546	1
ENSG00000115758	ODC1	ornithine decarboxylase 1	chr2	-1.30987	7.61789	0.0249069
ENSG00000143476	DTL	denticleless E3 ubiquitin protein ligase homolog	chr1	0.880869	7.10394	1
ENSG00000176887	SOX11	SRY-box 11	chr2	0.802701	8.94597	1
ENSG00000142208	AKT1	AKT serine/threonine kinase 1	chr14	1.27031	8.11484	0.0268408
ENSG00000150687	PRSS23	protease, serine 23	chr11	0.856571	7.35259	1
ENSG00000182809	CRIP2	cysteine rich protein 2	chr14	-0.311203	7.44895	1
ENSG00000105723	GSK3A	glycogen synthase kinase 3 alpha	chr19	1.22454	7.75135	0.117219
ENSG00000074416	MGLL	monoglyceride lipase	chr3	3.52232	7.40766	1.5e-36
ENSG00000198146	ZNF770	zinc finger protein 770	chr15	0.901841	7.82539	1
ENSG00000146918	NCAPG2	non-SMC condensin II complex subunit G2	chr7	0.412864	7.40492	1
ENSG00000069188	SDK2	sidekick cell adhesion molecule 2	chr17	-1.01084	7.95816	1
ENSG00000215769	ARHGAP27P1	Rho GTPase activating protein 27 pseudogene 1	chr17	0.0196024	7.68883	1
ENSG00000181690	PLAG1	PLAG1 zinc finger	chr8	0.716117	7.49906	1
ENSG00000091972	CD200	CD200 molecule	chr3	0.650417	7.58761	1
ENSG00000143157	POGK	pogo transposable element with KRAB domain	chr1	0.840779	7.79118	1
ENSG00000170515	PA2G4	proliferation-associated 2G4	chr12	1.06993	8.22977	0.698134
ENSG00000167766	ZNF83	zinc finger protein 83	chr19	0.252681	7.71776	1
ENSG00000103502	CDIPT	CDP-diacylglycerol--inositol 3-phosphatidyltransferase	chr16	0.888439	7.61375	1
ENSG00000176973	FAM89B	family with sequence similarity 89 member B	chr11	0.765214	7.57694	1
ENSG00000114279	FGF12	fibroblast growth factor 12	chr3	-3.66961	6.82229	2.38e-33
ENSG00000172466	ZNF24	zinc finger protein 24	chr18	0.555107	8.40215	1
ENSG00000131844	MCCC2	methylcrotonoyl-CoA carboxylase 2	chr5	0.402991	7.34375	1
ENSG00000132694	ARHGEF11	Rho guanine nucleotide exchange factor 11	chr1	1.25736	7.66149	0.0942762
ENSG00000260027	HOXB7	homeobox B7	chr17	-0.615557	8.12379	1
ENSG00000182628	SKA2	spindle and kinetochore associated complex subunit 2	chr17	0.308208	7.82109	1
ENSG00000118971	CCND2	cyclin D2	chr12	-0.832766	7.93401	1
ENSG00000172936	MYD88	myeloid differentiation primary response 88	chr3	1.50277	6.92619	0.0442127
ENSG00000153317	ASAP1	ArfGAP with SH3 domain, ankyrin repeat and PH domain 1	chr8	1.09256	8.47198	0.515983
ENSG00000143401	ANP32E	acidic nuclear phosphoprotein 32 family member E	chr1	-0.0788525	8.15036	1
ENSG00000143321	HDGF	heparin binding growth factor	chr1	0.457656	8.62785	1
ENSG00000125247	TMTC4	transmembrane and tetratricopeptide repeat containing 4	chr13	0.784538	7.57723	1
ENSG00000137404	NRM	nurim (nuclear envelope membrane protein)	chr6_dbb_hap3	0.741228	7.58053	1
ENSG00000128283	CDC42EP1	CDC42 effector protein 1	chr22	1.91557	7.54892	2.45e-08
ENSG00000172716	SLFN11	schlafen family member 11	chr17	0.231339	7.20912	1
ENSG00000176771	NCKAP5	NCK associated protein 5	chr2	-3.45591	6.90326	4.29e-35
ENSG00000114631	PODXL2	podocalyxin like 2	chr3	2.25717	7.3126	1.25e-10
ENSG00000167325	RRM1	ribonucleotide reductase catalytic subunit M1	chr11	0.477971	7.89826	1
ENSG00000124795	DEK	DEK proto-oncogene	chr6	0.575558	8.47241	1
ENSG00000181234	TMEM132C	transmembrane protein 132C	chr12	-2.43947	7.2353	1.59e-22
ENSG00000121152	NCAPH	non-SMC condensin I complex subunit H	chr2	0.632026	7.24336	1
ENSG00000069275	NUCKS1	nuclear casein kinase and cyclin dependent kinase substrate 1	chr1	0.27217	10.0289	1
ENSG00000058668	ATP2B4	ATPase plasma membrane Ca2+ transporting 4	chr1	-0.843639	7.87443	1
ENSG00000175745	NR2F1	nuclear receptor subfamily 2 group F member 1	chr5	-0.617408	9.61322	1
ENSG00000135446	CDK4	cyclin dependent kinase 4	chr12	1.26912	8.59657	0.00601408
ENSG00000164588	HCN1	hyperpolarization activated cyclic nucleotide gated potassium channel 1	chr5	2.60591	6.89784	7.35e-09
ENSG00000111206	FOXM1	forkhead box M1	chr12	0.414371	7.34989	1
ENSG00000173065	FAM222B	family with sequence similarity 222 member B	chr17	0.305167	7.94671	1
ENSG00000100281	HMGXB4	HMG-box containing 4	chr22	0.771368	7.76539	1
ENSG00000276293	PIP4K2B	phosphatidylinositol-5-phosphate 4-kinase type 2 beta	chr17	0.367856	8.43559	1
ENSG00000125835	SNRPB	small nuclear ribonucleoprotein polypeptides B and B1	chr20	0.80523	8.45645	1
ENSG00000113140	SPARC	secreted protein acidic and cysteine rich	chr5	-0.54366	10.32	1
ENSG00000108055	SMC3	structural maintenance of chromosomes 3	chr10	0.603945	8.48504	1
ENSG00000171956	FOXB1	forkhead box B1	chr15	-3.91886	6.8496	3.15e-49
ENSG00000155099	TMEM55A	transmembrane protein 55A	chr8	0.3464	7.30965	1
ENSG00000253729	PRKDC	protein kinase, DNA-activated, catalytic polypeptide	chr8	0.2028	8.90844	1
ENSG00000164985	PSIP1	PC4 and SFRS1 interacting protein 1	chr9	0.132658	8.87247	1
ENSG00000133110	POSTN	periostin	chr13	2.86912	6.901	3.32e-12
ENSG00000101057	MYBL2	MYB proto-oncogene like 2	chr20	1.02412	7.21144	1
ENSG00000095261	PSMD5	proteasome 26S subunit, non-ATPase 5	chr9	0.321321	7.59482	1
ENSG00000165300	SLITRK5	SLIT and NTRK like family member 5	chr13	-1.1954	7.53868	0.179341
ENSG00000183508	FAM46C	family with sequence similarity 46 member C	chr1	-0.422485	7.19117	1
ENSG00000110492	MDK	midkine (neurite growth-promoting factor 2)	chr11	-0.160413	9.33612	1
ENSG00000168264	IRF2BP2	interferon regulatory factor 2 binding protein 2	chr1	-0.698409	7.77784	1
ENSG00000156011	PSD3	pleckstrin and Sec7 domain containing 3	chr8	0.150884	7.58335	1
ENSG00000160752	FDPS	farnesyl diphosphate synthase	chr1	-0.238186	8.99043	1
ENSG00000177508	IRX3	iroquois homeobox 3	chr16	-3.42453	6.88664	2.24e-31
ENSG00000123737	EXOSC9	exosome component 9	chr4	0.733404	7.65768	1
ENSG00000149115	TNKS1BP1	tankyrase 1 binding protein 1	chr11	0.464591	7.59456	1
ENSG00000044574	HSPA5	heat shock protein family A (Hsp70) member 5	chr9	-0.440419	8.94744	1
ENSG00000115738	ID2	inhibitor of DNA binding 2, HLH protein	chr2	-2.65989	6.89739	6.66e-13
ENSG00000168546	GFRA2	GDNF family receptor alpha 2	chr8	0.303761	7.07963	1
ENSG00000250722	SELENOP	selenoprotein P	chr5	-1.12568	7.13139	0.598373
ENSG00000181220	ZNF746	zinc finger protein 746	chr7	0.375347	7.15626	1
ENSG00000133121	STARD13	StAR related lipid transfer domain containing 13	chr13	1.69403	7.46361	3.94e-05
ENSG00000040275	SPDL1	spindle apparatus coiled-coil protein 1	chr5	0.7339	7.28711	1
ENSG00000083168	KAT6A	lysine acetyltransferase 6A	chr8	0.216025	8.12038	1
ENSG00000115306	SPTBN1	spectrin beta, non-erythrocytic 1	chr2	1.3356	9.33523	8.42e-06
ENSG00000116017	ARID3A	AT-rich interaction domain 3A	chr19	-0.86157	8.31364	1
ENSG00000070761	CFAP20	cilia and flagella associated protein 20	chr16	0.939439	7.65061	1
ENSG00000143569	UBAP2L	ubiquitin associated protein 2 like	chr1	0.777592	8.32005	1
ENSG00000131779	PEX11B	peroxisomal biogenesis factor 11 beta	chr1	1.00852	7.23616	1
ENSG00000130702	MIR4758	microRNA 4758	NA	-0.965313	7.55469	1
ENSG00000095951	HIVEP1	human immunodeficiency virus type I enhancer binding protein 1	chr6	0.398006	7.17447	1
ENSG00000134901	KDELC1	KDEL motif containing 1	chr13	0.445872	7.29125	1
ENSG00000154556	SORBS2	sorbin and SH3 domain containing 2	chr4	-1.22072	7.62231	0.108239
ENSG00000092421	SEMA6A	semaphorin 6A	chr5	-1.43445	7.16222	0.0200578
ENSG00000188647	PTAR1	protein prenyltransferase alpha subunit repeat containing 1	chr9	1.17405	7.91544	0.183708
ENSG00000168916	ZNF608	zinc finger protein 608	chr5	-0.308671	7.78971	1
ENSG00000092758	COL9A3	collagen type IX alpha 3 chain	chr20	-1.24371	7.15417	0.217612
ENSG00000175265	GOLGA8A	golgin A8 family member A	chr15	-0.276738	8.17965	1
ENSG00000138448	ITGAV	integrin subunit alpha V	chr2	1.35248	8.19814	0.00139468
ENSG00000135902	CHRND	cholinergic receptor nicotinic delta subunit	chr2	0.642575	7.14336	1
ENSG00000130147	SH3BP4	SH3 domain binding protein 4	chr2	-1.13858	7.26885	0.50064
ENSG00000178567	EPM2AIP1	EPM2A interacting protein 1	chr3	0.341186	8.05756	1
ENSG00000156973	PDE6D	phosphodiesterase 6D	chr2	1.04373	7.27345	0.941823
ENSG00000172667	ZMAT3	zinc finger matrin-type 3	chr3	0.875055	7.7303	1
ENSG00000092621	PHGDH	phosphoglycerate dehydrogenase	chr1	-0.179291	8.4752	1
ENSG00000116133	DHCR24	24-dehydrocholesterol reductase	chr1	-0.287677	8.62062	1
ENSG00000173917	HOXB2	homeobox B2	chr17	-0.280415	7.34504	1
ENSG00000178209	PLEC	plectin	chr8	0.395283	8.00008	1
ENSG00000143390	RFX5	regulatory factor X5	chr1	-0.109144	7.46181	1
ENSG00000175606	TMEM70	transmembrane protein 70	chr8	0.383696	7.26304	1
ENSG00000167840	ZNF232	zinc finger protein 232	chr17	0.443693	6.98279	1
ENSG00000168268	NT5DC2	5'-nucleotidase domain containing 2	chr3	1.38365	8.22555	0.000381297
ENSG00000164402	2008-09-01	septin 8	chr5	1.70443	7.49709	1.14e-05
ENSG00000078018	MAP2	microtubule associated protein 2	chr2	-1.0553	7.93127	0.864713
ENSG00000198121	LPAR1	lysophosphatidic acid receptor 1	chr9	-1.95545	7.09802	2.26e-07
ENSG00000078053	AMPH	amphiphysin	chr7	-3.39836	6.98449	1.01e-46
ENSG00000120685	PROSER1	proline and serine rich 1	chr13	-0.0530127	7.58076	1
ENSG00000261824	LINC00662	long intergenic non-protein coding RNA 662	NA	0.892259	7.37883	1
ENSG00000154723	ATP5J	ATP synthase, H+ transporting, mitochondrial Fo complex subunit F6	chr21	0.509776	7.75716	1
ENSG00000198369	SPRED2	sprouty related EVH1 domain containing 2	chr2	0.421622	7.43602	1
ENSG00000175567	UCP2	uncoupling protein 2	chr11	1.29109	7.65827	0.0421365
ENSG00000108100	CCNY	cyclin Y	chr10	0.746801	7.88209	1
ENSG00000234127	TRIM26	tripartite motif containing 26	chr6_dbb_hap3	0.386967	7.33606	1
ENSG00000185630	PBX1	PBX homeobox 1	chr1	-0.203817	8.22832	1
ENSG00000233802	TRIM49D2	tripartite motif containing 49D2	chr11	3.12015	6.84806	1.44e-16
ENSG00000101680	LAMA1	laminin subunit alpha 1	chr18	0.242331	8.37575	1
ENSG00000115875	SRSF7	serine and arginine rich splicing factor 7	chr2	0.675419	8.59118	1
ENSG00000186193	SAPCD2	suppressor APC domain containing 2	chr9	0.74123	6.96899	1
ENSG00000162736	NCSTN	nicastrin	chr1	0.310126	7.6072	1
ENSG00000128606	LRRC17	leucine rich repeat containing 17	chr7	-1.07257	7.56076	0.757194
ENSG00000112319	EYA4	EYA transcriptional coactivator and phosphatase 4	chr6	-2.78219	6.90464	2.5e-18
ENSG00000131016	AKAP12	A-kinase anchoring protein 12	chr6	0.0226175	7.34176	1
ENSG00000111799	COL12A1	collagen type XII alpha 1 chain	chr6	-0.749243	7.00186	1
ENSG00000166803	PCLAF	PCNA clamp associated factor	chr15	0.509781	7.46669	1
ENSG00000196628	TCF4	transcription factor 4	chr18	-1.26744	8.00566	0.0107686
ENSG00000138385	SSB	Sjogren syndrome antigen B	chr2	0.860136	8.2344	1
ENSG00000164418	GRIK2	glutamate ionotropic receptor kainate type subunit 2	chr6	2.56294	7.06849	1.33e-11
ENSG00000054690	PLEKHH1	pleckstrin homology, MyTH4 and FERM domain containing H1	chr14	2.76257	7.19541	6.88e-17
ENSG00000188033	ZNF490	zinc finger protein 490	chr19	-0.593324	7.69326	1
ENSG00000101224	CDC25B	cell division cycle 25B	chr20	-0.76974	7.22441	1
ENSG00000115866	DARS	aspartyl-tRNA synthetase	chr2	0.461877	8.31324	1
ENSG00000077279	DCX	doublecortin	chrX	3.18052	7.07617	2.56e-20
ENSG00000189120	SP6	Sp6 transcription factor	chr17	-3.66397	6.80232	3.25e-39
ENSG00000163808	KIF15	kinesin family member 15	chr3	0.531661	7.21381	1
ENSG00000186185	KIF18B	kinesin family member 18B	chr17	0.816298	7.06342	1
ENSG00000125733	TRIP10	thyroid hormone receptor interactor 10	chr19	0.867797	7.27385	1
ENSG00000123975	CKS2	CDC28 protein kinase regulatory subunit 2	chr9	-0.0960852	7.61178	1
ENSG00000128951	DUT	deoxyuridine triphosphatase	chr15	0.608132	7.59513	1
ENSG00000170899	GSTA4	glutathione S-transferase alpha 4	chr6	0.0873768	7.9021	1
ENSG00000176208	ATAD5	ATPase family, AAA domain containing 5	chr17	0.878305	7.43574	1
ENSG00000143416	SELENBP1	selenium binding protein 1	chr1	0.330495	7.73435	1
ENSG00000161800	RACGAP1	Rac GTPase activating protein 1	chr12	0.437912	7.13315	1
ENSG00000143319	ISG20L2	interferon stimulated exonuclease gene 20 like 2	chr1	0.80304	7.62123	1
ENSG00000198795	ZNF521	zinc finger protein 521	chr18	-1.79828	7.58429	1.76e-10
ENSG00000277150	F8A3	coagulation factor VIII-associated 3	NA	0.401159	7.03001	1
ENSG00000122952	ZWINT	ZW10 interacting kinetochore protein	chr10	1.1174	7.18374	0.576161
ENSG00000128463	EMC4	ER membrane protein complex subunit 4	chr15	0.503306	7.91178	1
ENSG00000178498	DTX3	deltex E3 ubiquitin ligase 3	chr12	-0.0418412	7.58529	1
ENSG00000021300	PLEKHB1	pleckstrin homology domain containing B1	chr11	1.97225	7.16266	2.81e-06
ENSG00000122861	PLAU	plasminogen activator, urokinase	chr10	-1.90849	7.04013	8.29e-06
ENSG00000139926	FRMD6	FERM domain containing 6	chr14	1.95896	7.52995	4.19e-09
ENSG00000198825	INPP5F	inositol polyphosphate-5-phosphatase F	chr10	0.972763	7.5527	1
ENSG00000060982	BCAT1	branched chain amino acid transaminase 1	chr12	-0.521193	8.40604	1
ENSG00000173207	CKS1B	CDC28 protein kinase regulatory subunit 1B	chr1	0.465543	7.55483	1
ENSG00000091129	NRCAM	neuronal cell adhesion molecule	chr7	-2.12968	7.11028	5.75e-11
ENSG00000162607	USP1	ubiquitin specific peptidase 1	chr1	0.835893	7.66135	1
ENSG00000164144	ARFIP1	ADP ribosylation factor interacting protein 1	chr4	0.751941	7.55169	1
ENSG00000141582	CBX4	chromobox 4	chr17	0.584579	7.41681	1
ENSG00000184205	TSPYL2	TSPY like 2	chrX	0.908479	7.31459	1
ENSG00000160307	S100B	S100 calcium binding protein B	chr21	3.46611	7.35708	6.43e-34
ENSG00000166348	USP54	ubiquitin specific peptidase 54	chr10	0.357499	7.38487	1
ENSG00000216775	LOC730101	uncharacterized LOC730101	NA	0.376	6.93529	1
ENSG00000198598	MMP17	matrix metallopeptidase 17	chr12	3.69936	7.26033	9.16e-36
ENSG00000147874	HAUS6	HAUS augmin like complex subunit 6	chr9	0.788802	7.75625	1
ENSG00000134324	LPIN1	lipin 1	chr2	-0.637361	7.71559	1
ENSG00000166340	TPP1	tripeptidyl peptidase 1	chr11	0.484875	7.80147	1
ENSG00000012048	BRCA1	BRCA1, DNA repair associated	chr17	0.680259	7.45821	1
ENSG00000185619	PCGF3	polycomb group ring finger 3	chr4	0.272016	7.7511	1
ENSG00000165006	UBAP1	ubiquitin associated protein 1	chr9	0.15477	7.47979	1
ENSG00000131508	UBE2D2	ubiquitin conjugating enzyme E2 D2	chr5	0.487771	8.29733	1
ENSG00000196781	TLE1	transducin like enhancer of split 1	chr9	0.586096	7.97148	1
ENSG00000110660	SLC35F2	solute carrier family 35 member F2	chr11	1.77974	7.15961	0.000123451
ENSG00000169105	CHST14	carbohydrate sulfotransferase 14	chr15	1.43804	7.23938	0.0179442
ENSG00000170779	CDCA4	cell division cycle associated 4	chr14	1.00371	7.24589	1
ENSG00000273749	CYFIP1	cytoplasmic FMR1 interacting protein 1	chr15	0.833433	8.30614	1
ENSG00000067082	KLF6	Kruppel like factor 6	chr10	-0.440995	7.67173	1
ENSG00000121440	PDZRN3	PDZ domain containing ring finger 3	chr3	1.55525	7.15237	0.00490948
ENSG00000171314	PGAM1	phosphoglycerate mutase 1	chr10	0.42857	9.08369	1
ENSG00000156471	PTDSS1	phosphatidylserine synthase 1	chr8	0.425075	7.64343	1
ENSG00000164741	DLC1	DLC1 Rho GTPase activating protein	chr8	1.38724	7.45696	0.0182002
ENSG00000117318	ID3	inhibitor of DNA binding 3, HLH protein	chr1	-2.85382	6.96478	3.29e-24
ENSG00000149485	MIR1908	microRNA 1908	NA	-0.807529	9.59532	1
ENSG00000076321	KLHL20	kelch like family member 20	chr1	-0.444955	7.63155	1
ENSG00000169188	APEX2	apurinic/apyrimidinic endodeoxyribonuclease 2	chrX	0.947019	7.18468	1
ENSG00000165655	ZNF503	zinc finger protein 503	chr10	-0.326651	7.61481	1
ENSG00000182973	CNOT10	CCR4-NOT transcription complex subunit 10	chr3	0.41594	7.83284	1
ENSG00000119777	TMEM214	transmembrane protein 214	chr2	0.494407	7.23762	1
ENSG00000162783	IER5	immediate early response 5	chr1	-1.47752	7.20343	0.00413151
ENSG00000141349	G6PC3	glucose-6-phosphatase catalytic subunit 3	chr17	0.546646	7.64593	1
ENSG00000164111	ANXA5	annexin A5	chr4	-0.0253819	8.61464	1
ENSG00000171604	CXXC5	CXXC finger protein 5	chr5	-1.22321	7.78891	0.0711655
ENSG00000009954	BAZ1B	bromodomain adjacent to zinc finger domain 1B	chr7	0.406322	8.35036	1
ENSG00000055044	NOP58	NOP58 ribonucleoprotein	chr2	0.577772	8.11441	1
ENSG00000204308	RNF5	ring finger protein 5	chr6_qbl_hap6	0.37563	7.68118	1
ENSG00000168646	AXIN2	axin 2	chr17	-0.438854	7.75931	1
ENSG00000127863	TNFRSF19	TNF receptor superfamily member 19	chr13	1.4839	8.06224	3.64e-05
ENSG00000138756	BMP2K	BMP2 inducible kinase	chr4	0.621191	7.46889	1
ENSG00000119397	CNTRL	centriolin	chr9	0.813745	7.721	1
ENSG00000168765	GSTM4	glutathione S-transferase mu 4	chr1	0.730553	7.29758	1
ENSG00000154529	LOC100289279	contactin associated protein-like 3-like	NA	-1.75319	7.41197	9.7e-08
ENSG00000108179	PPIF	peptidylprolyl isomerase F	chr10	0.477231	7.50033	1
ENSG00000079819	EPB41L2	erythrocyte membrane protein band 4.1 like 2	chr6	0.603173	8.32123	1
ENSG00000102935	ZNF423	zinc finger protein 423	chr16	-1.79473	7.38783	5.62e-09
ENSG00000083857	FAT1	FAT atypical cadherin 1	chr4	-1.85487	7.32431	1.67e-09
ENSG00000139514	SLC7A1	solute carrier family 7 member 1	chr13	0.721497	7.46751	1
ENSG00000196776	CD47	CD47 molecule	chr3	1.16775	7.97469	0.192438
ENSG00000116729	WLS	wntless Wnt ligand secretion mediator	chr1	-1.22027	8.36616	0.0185243
ENSG00000154734	ADAMTS1	ADAM metallopeptidase with thrombospondin type 1 motif 1	chr21	1.64388	7.08497	0.00282737
ENSG00000131467	PSME3	proteasome activator subunit 3	chr17	1.04781	7.8507	0.938392
ENSG00000166483	WEE1	WEE1 G2 checkpoint kinase	chr11	0.296067	7.42584	1
ENSG00000107796	ACTA2	actin, alpha 2, smooth muscle, aorta	chr10	0.701657	7.11965	1
ENSG00000124733	MEA1	male-enhanced antigen 1	chr6	0.685594	7.5667	1
ENSG00000160211	G6PD	glucose-6-phosphate dehydrogenase	chrX	0.863422	7.56266	1
ENSG00000158417	EIF5B	eukaryotic translation initiation factor 5B	chr2	0.879018	8.81621	1
ENSG00000168003	SLC3A2	solute carrier family 3 member 2	chr11	0.362313	8.02016	1
ENSG00000092051	JPH4	junctophilin 4	chr14	-1.19565	7.10431	0.320621
ENSG00000183287	CCBE1	collagen and calcium binding EGF domains 1	chr18	-3.24612	6.83193	1.1e-28
ENSG00000131473	ACLY	ATP citrate lyase	chr17	0.0720741	8.91826	1
ENSG00000123358	NR4A1	nuclear receptor subfamily 4 group A member 1	chr12	1.90598	7.42841	6.42e-08
ENSG00000124766	SOX4	SRY-box 4	chr6	-0.0858496	8.64514	1
ENSG00000108518	PFN1	profilin 1	chr17	1.0868	9.10122	0.422764
ENSG00000185414	MRPL30	mitochondrial ribosomal protein L30	chr2	0.199322	7.58494	1
ENSG00000234456	MAGI2-AS3	MAGI2 antisense RNA 3	NA	0.486262	7.15236	1
ENSG00000148942	SLC5A12	solute carrier family 5 member 12	chr11	0.622265	7.36471	1
ENSG00000138801	PAPSS1	3'-phosphoadenosine 5'-phosphosulfate synthase 1	chr4	1.1649	8.13203	0.164228
ENSG00000241685	ARPC1A	actin related protein 2/3 complex subunit 1A	chr7	0.726522	8.57054	1
ENSG00000156925	ZIC3	Zic family member 3	chrX	-3.03291	6.95042	7.12e-32
ENSG00000119487	MAPKAP1	mitogen-activated protein kinase associated protein 1	chr9	0.65128	7.64414	1
ENSG00000180914	OXTR	oxytocin receptor	chr3	2.87812	6.8792	2.12e-13
ENSG00000188738	FSIP2	fibrous sheath interacting protein 2	chr2	-0.0596279	7.60091	1
ENSG00000133884	DPF2	double PHD fingers 2	chr11	0.573079	7.55975	1
ENSG00000188783	PRELP	proline and arginine rich end leucine rich repeat protein	chr1	1.21993	7.14229	0.249398
ENSG00000167191	GPRC5B	G protein-coupled receptor class C group 5 member B	chr16	0.19656	7.2019	1
ENSG00000160410	SHKBP1	SH3KBP1 binding protein 1	chr19	1.09299	7.66947	0.605795
ENSG00000167670	CHAF1A	chromatin assembly factor 1 subunit A	chr19	1.13016	7.19679	0.498454
ENSG00000139329	LUM	lumican	chr12	-1.74876	6.84373	0.00214791
ENSG00000100505	TRIM9	tripartite motif containing 9	chr14	1.73531	7.45104	6.29e-06
ENSG00000006634	DBF4	DBF4 zinc finger	chr7	0.653339	7.50141	1
ENSG00000122966	MIR1178	microRNA 1178	NA	0.11789	7.32045	1
ENSG00000170345	FOS	Fos proto-oncogene, AP-1 transcription factor subunit	chr14	-0.238421	7.03652	1
ENSG00000111665	CDCA3	cell division cycle associated 3	chr12	0.295405	7.01214	1
ENSG00000166848	LOC105371348	uncharacterized LOC105371348	NA	-0.183681	7.89784	1
ENSG00000177045	SIX5	SIX homeobox 5	chr19	0.173315	7.43757	1
ENSG00000130803	ZNF317	zinc finger protein 317	chr19	0.475344	7.26745	1
ENSG00000135916	ITM2C	integral membrane protein 2C	chr2	0.44373	8.8201	1
ENSG00000105997	HOXA3	homeobox A3	chr7	-1.18519	7.14074	0.334116
ENSG00000159840	ZYX	zyxin	chr7	0.112687	7.92747	1
ENSG00000126822	PLEKHG3	pleckstrin homology and RhoGEF domain containing G3	chr14	-0.631707	7.7079	1
ENSG00000182010	RTKN2	rhotekin 2	chr10	0.796768	7.23063	1
ENSG00000123213	NLN	neurolysin	chr5	0.196494	7.43978	1
ENSG00000146278	PNRC1	proline rich nuclear receptor coactivator 1	chr6	1.03113	8.06608	1
ENSG00000184445	KNTC1	kinetochore associated 1	chr12	0.781194	7.45444	1
ENSG00000176454	LPCAT4	lysophosphatidylcholine acyltransferase 4	chr15	0.820794	7.45954	1
ENSG00000133606	MKRN1	makorin ring finger protein 1	chr7	0.619924	7.88855	1
ENSG00000140688	C16orf58	chromosome 16 open reading frame 58	chr16	0.602428	7.39805	1
ENSG00000151612	ZNF827	zinc finger protein 827	chr4	-0.837676	7.52093	1
ENSG00000187240	DYNC2H1	dynein cytoplasmic 2 heavy chain 1	chr11	-0.484816	7.9425	1
ENSG00000066468	FGFR2	fibroblast growth factor receptor 2	chr10	-3.08403	6.96315	3.61e-35
ENSG00000137868	STRA6	stimulated by retinoic acid 6	chr15	-0.823145	7.84773	1
ENSG00000165410	CFL2	cofilin 2	chr14	0.308075	7.86579	1
ENSG00000133059	DSTYK	dual serine/threonine and tyrosine protein kinase	chr1	0.813883	7.89787	1
ENSG00000018189	RUFY3	RUN and FYVE domain containing 3	chr4	-0.863935	8.07842	1
ENSG00000136925	TSTD2	thiosulfate sulfurtransferase like domain containing 2	chr9	0.344631	7.22194	1
ENSG00000065328	MCM10	minichromosome maintenance 10 replication initiation factor	chr10	1.4316	7.05721	0.0362408
ENSG00000165801	ARHGEF40	Rho guanine nucleotide exchange factor 40	chr14	-0.428313	7.95889	1
ENSG00000166004	CEP295	centrosomal protein 295	chr11	0.280674	7.42418	1
ENSG00000035499	DEPDC1B	DEP domain containing 1B	chr5	0.464718	7.22214	1
ENSG00000178980	SELENOW	selenoprotein W	chr19	1.23618	7.99797	0.0557946
ENSG00000116106	EPHA4	EPH receptor A4	chr2	-3.61561	6.79231	4.57e-41
ENSG00000036054	TBC1D23	TBC1 domain family member 23	chr3	0.825396	7.34139	1
ENSG00000171444	MCC	mutated in colorectal cancers	chr5	0.40821	7.16173	1
ENSG00000164754	MIR3610	microRNA 3610	NA	-0.280733	8.76939	1
ENSG00000166147	FBN1	fibrillin 1	chr15	-1.61216	7.05833	0.000699037
ENSG00000148400	NOTCH1	notch 1	chr9	0.958718	7.90633	1
ENSG00000172534	HCFC1	host cell factor C1	chrX	0.227427	8.26867	1
ENSG00000165175	MID1IP1	MID1 interacting protein 1	chrX	0.611314	7.69277	1
ENSG00000164815	ORC5	origin recognition complex subunit 5	chr7	0.927934	7.11371	1
ENSG00000205339	IPO7	importin 7	chr11	0.422597	8.50935	1
ENSG00000138398	PPIG	peptidylprolyl isomerase G	chr2	0.585706	8.88641	1
ENSG00000166750	SLFN5	schlafen family member 5	chr17	0.665935	7.23173	1
ENSG00000174136	RGMB	repulsive guidance molecule family member b	chr5	-0.345315	7.20902	1
ENSG00000074266	MIR6755	microRNA 6755	NA	1.78282	7.27956	1.73e-05
ENSG00000111674	ENO2	enolase 2	chr12	0.413859	7.27658	1
ENSG00000115163	CENPA	centromere protein A	chr2	0.594474	6.95443	1
ENSG00000168785	TSPAN5	tetraspanin 5	chr4	-0.164143	7.47096	1
ENSG00000136450	SRSF1	serine and arginine rich splicing factor 1	chr17	0.710198	8.53242	1
ENSG00000103018	CYB5B	cytochrome b5 type B	chr16	-0.262562	8.0736	1
ENSG00000143333	RGS16	regulator of G-protein signaling 16	chr1	-2.47978	6.76436	4.01e-08
ENSG00000135862	LAMC1	laminin subunit gamma 1	chr1	0.348947	9.84885	1
ENSG00000152818	UTRN	utrophin	chr6	-0.0464828	8.1198	1
ENSG00000277203	F8A1	coagulation factor VIII-associated 1	chrX	0.331709	6.99907	1
ENSG00000166197	NOLC1	nucleolar and coiled-body phosphoprotein 1	chr10	0.438597	7.89521	1
ENSG00000156299	TIAM1	T-cell lymphoma invasion and metastasis 1	chr21	1.44521	9.35579	1.93e-10
ENSG00000148700	ADD3	adducin 3	chr10	-0.0129592	8.30512	1
ENSG00000186063	AIDA	axin interactor, dorsalization associated	chr1	0.279101	8.02482	1
ENSG00000064313	TAF2	TATA-box binding protein associated factor 2	chr8	0.399388	7.74839	1
ENSG00000122877	EGR2	early growth response 2	chr10	0.632937	6.90754	1
ENSG00000063587	LOC105373378	uncharacterized LOC105373378	NA	0.62856	7.20434	1
ENSG00000274333	LOC102724219	uncharacterized LOC102724219	NA	0.768226	8.46174	1
ENSG00000160285	LSS	lanosterol synthase	chr21	-0.471158	8.31757	1
ENSG00000073169	SELENOO	selenoprotein O	chr22	0.754493	7.14201	1
ENSG00000109861	CTSC	cathepsin C	chr11	1.94884	7.57607	3.41e-10
ENSG00000184226	PCDH9	protocadherin 9	chr13	-0.975474	6.97678	1
ENSG00000148343	MIGA2	mitoguardin 2	chr9	0.576933	7.04321	1
ENSG00000110104	CCDC86	coiled-coil domain containing 86	chr11	1.16239	7.098	0.405747
ENSG00000162063	CCNF	cyclin F	chr16	0.623736	7.10119	1
ENSG00000108511	HOXB6	homeobox B6	chr17	-0.636211	7.66313	1
ENSG00000173706	HEG1	heart development protein with EGF like domains 1	chr3	0.274682	7.66837	1
ENSG00000146731	CCT6A	chaperonin containing TCP1 subunit 6A	chr7	0.935604	8.97735	1
ENSG00000081189	MEF2C	myocyte enhancer factor 2C	chr5	1.75951	7.46905	2.87e-06
ENSG00000277991	LOC102723360	uncharacterized LOC102723360	NA	0.789052	8.45154	1
ENSG00000111785	RIC8B	RIC8 guanine nucleotide exchange factor B	chr12	0.915059	7.59177	1
ENSG00000111860	CEP85L	centrosomal protein 85 like	chr6	0.426508	7.79844	1
ENSG00000213347	MXD3	MAX dimerization protein 3	chr5	0.717051	6.96998	1
ENSG00000081913	PHLPP1	PH domain and leucine rich repeat protein phosphatase 1	chr18	0.794352	7.1242	1
ENSG00000094804	CDC6	cell division cycle 6	chr17	1.05302	7.01127	0.806108
ENSG00000167601	AXL	AXL receptor tyrosine kinase	chr19	-0.05466	7.30571	1
ENSG00000111783	RFX4	regulatory factor X4	chr12	-1.39626	6.82449	0.0808979
ENSG00000077942	FBLN1	fibulin 1	chr22	-0.155814	9.22356	1
ENSG00000139174	PRICKLE1	prickle planar cell polarity protein 1	chr12	-3.30132	6.84385	3.22e-35
ENSG00000159164	SV2A	synaptic vesicle glycoprotein 2A	chr1	0.394823	7.70683	1
ENSG00000172725	CORO1B	coronin 1B	chr11	0.62488	7.66659	1
ENSG00000133119	RFC3	replication factor C subunit 3	chr13	0.944402	7.27212	1
ENSG00000143190	POU2F1	POU class 2 homeobox 1	chr1	-0.093136	8.07159	1
ENSG00000159086	PAXBP1	PAX3 and PAX7 binding protein 1	chr21	0.403095	8.25706	1
ENSG00000167614	TTYH1	tweety family member 1	chr19	0.894826	7.90989	1
ENSG00000167749	KLK4	kallikrein related peptidase 4	chr19	1.25696	6.76409	0.262534
ENSG00000140450	ARRDC4	arrestin domain containing 4	chr15	-0.588217	7.63132	1
ENSG00000180447	GAS1	growth arrest specific 1	chr9	0.276625	6.95804	1
ENSG00000106462	EZH2	enhancer of zeste 2 polycomb repressive complex 2 subunit	chr7	0.209933	7.84371	1
ENSG00000005100	DHX33	DEAH-box helicase 33	chr17	1.29055	7.34802	0.0785718
ENSG00000163104	SMARCAD1	SWI/SNF-related, matrix-associated actin-dependent regulator of chromatin, subfamily a, containing DEAD/H box 1	chr4	0.806214	7.82783	1
ENSG00000160200	CBS	cystathionine-beta-synthase	chr21	0.176537	8.07613	1
ENSG00000215252	GOLGA8A	golgin A8 family member A	chr15	-0.459299	8.22288	1
ENSG00000150893	FREM2	FRAS1 related extracellular matrix protein 2	chr13	1.03435	7.74446	1
ENSG00000106714	CNTNAP3	contactin associated protein-like 3	chr9	-2.01847	7.15398	3.01e-10
ENSG00000019144	MIR6716	microRNA 6716	NA	1.21434	7.8278	0.0995185
ENSG00000214160	ALG3	ALG3, alpha-1,3- mannosyltransferase	chr3	0.56286	7.13515	1
ENSG00000274276	CBSL	cystathionine-beta-synthase like	NA	0.145006	8.04039	1
ENSG00000180530	NRIP1	nuclear receptor interacting protein 1	chr21	-0.113411	8.05188	1
ENSG00000155324	GRAMD3	GRAM domain containing 3	chr5	1.93776	7.06018	1.39e-05
ENSG00000147162	OGT	O-linked N-acetylglucosamine (GlcNAc) transferase	chrX	0.114185	8.62689	1
ENSG00000271601	LIX1L	limb and CNS expressed 1 like	chr1	-0.105554	7.72827	1
ENSG00000135473	PAN2	PAN2 poly(A) specific ribonuclease subunit	chr12	0.353069	7.16853	1
ENSG00000110693	MIR6073	microRNA 6073	NA	-0.0487709	7.60471	1
ENSG00000115966	ATF2	activating transcription factor 2	chr2	0.336056	7.87	1
ENSG00000004864	SLC25A13	solute carrier family 25 member 13	chr7	-0.245146	8.01553	1
ENSG00000117713	ARID1A	AT-rich interaction domain 1A	chr1	0.651655	8.845	1
ENSG00000172081	MOB3A	MOB kinase activator 3A	chr19	0.0474218	7.26817	1
ENSG00000151502	VPS26B	VPS26, retromer complex component B	chr11	0.0434481	7.50932	1
ENSG00000155008	APOOL	apolipoprotein O like	chrX	0.332662	7.34825	1
ENSG00000204386	NEU1	neuraminidase 1	chr6_dbb_hap3	-0.743963	7.80275	1
ENSG00000214517	PPME1	protein phosphatase methylesterase 1	chr11	0.828719	7.41984	1
ENSG00000118322	ATP10B	ATPase phospholipid transporting 10B (putative)	chr5	3.51582	6.9999	7.08e-26
ENSG00000104549	SQLE	squalene epoxidase	chr8	-0.447304	8.42905	1
ENSG00000112139	MDGA1	MAM domain containing glycosylphosphatidylinositol anchor 1	chr6	-1.87565	6.92373	9.96e-06
ENSG00000128564	VGF	VGF nerve growth factor inducible	chr7	-1.95144	6.88721	2.92e-05
ENSG00000166250	CLMP	CXADR like membrane protein	chr11	-2.64255	7.02586	4.29e-24
ENSG00000039523	RIPOR1	RHO family interacting cell polarization regulator 1	chr16	0.719862	7.38515	1
ENSG00000137563	GGH	gamma-glutamyl hydrolase	chr8	-0.454089	7.86022	1
ENSG00000143126	CELSR2	cadherin EGF LAG seven-pass G-type receptor 2	chr1	1.05324	7.60325	0.859342
ENSG00000152092	ASTN1	astrotactin 1	chr1	-3.15334	6.88381	2.1e-32
ENSG00000162434	JAK1	Janus kinase 1	chr1	0.189893	7.65797	1
ENSG00000067064	IDI1	isopentenyl-diphosphate delta isomerase 1	chr10	-0.0929114	8.72569	1
ENSG00000169926	KLF13	Kruppel like factor 13	chr15	1.06681	7.7	0.772911
ENSG00000126247	CAPNS1	calpain small subunit 1	chr19	0.516906	9.04767	1
ENSG00000123473	STIL	SCL/TAL1 interrupting locus	chr1	0.766766	7.12272	1
ENSG00000184613	NELL2	neural EGFL like 2	chr12	-3.11025	6.90333	4.24e-34
ENSG00000260807	LMF1	lipase maturation factor 1	chr16	-0.178151	7.06565	1
ENSG00000173517	PEAK1	pseudopodium enriched atypical kinase 1	chr15	0.156688	7.57739	1
ENSG00000108947	EFNB3	ephrin B3	chr17	-1.25353	7.3489	0.0895692
ENSG00000111364	DDX55	DEAD-box helicase 55	chr12	0.9019	7.44788	1
ENSG00000132003	ZSWIM4	zinc finger SWIM-type containing 4	chr19	1.16726	6.98763	0.397076
ENSG00000144834	TAGLN3	transgelin 3	chr3	0.79425	7.00726	1
ENSG00000138336	TET1	tet methylcytosine dioxygenase 1	chr10	-0.285799	8.00357	1
ENSG00000118922	KLF12	Kruppel like factor 12	chr13	-0.877308	7.36615	1
ENSG00000141622	RNF165	ring finger protein 165	chr18	0.863598	7.85429	1
ENSG00000168386	FILIP1L	filamin A interacting protein 1 like	chr3	2.32715	6.99127	5.16e-09
ENSG00000113648	H2AFY	H2A histone family member Y	chr5	0.897825	8.61852	1
ENSG00000147588	PMP2	peripheral myelin protein 2	chr8	2.64455	6.76419	7.84e-11
ENSG00000138688	KIAA1109	KIAA1109	chr4	-0.693147	7.85146	1
ENSG00000114988	LMAN2L	lectin, mannose binding 2 like	chr2	-0.379278	7.12616	1
ENSG00000126603	GLIS2	GLIS family zinc finger 2	chr16	-0.713419	7.1979	1
ENSG00000146592	CREB5	cAMP responsive element binding protein 5	chr7	0.176711	7.07291	1
ENSG00000075340	ADD2	adducin 2	chr2	1.85067	7.02566	6.04e-05
ENSG00000115963	RND3	Rho family GTPase 3	chr2	0.913484	7.00268	1
ENSG00000142731	PLK4	polo like kinase 4	chr4	1.14635	7.0264	0.445735
ENSG00000183354	KIAA2026	KIAA2026	chr9	-0.201932	7.66495	1
ENSG00000174963	ZIC4	Zic family member 4	chr3	-3.91363	6.83043	1.65e-62
ENSG00000106006	HOXA6	homeobox A6	chr7	-1.18953	7.16775	0.28702
ENSG00000129810	SGO1	shugoshin 1	chr3	0.609573	7.13745	1
ENSG00000091986	CCDC80	coiled-coil domain containing 80	chr3	-0.654986	8.15526	1
ENSG00000157796	WDR19	WD repeat domain 19	chr4	-0.408935	7.38534	1
ENSG00000188610	FAM72B	family with sequence similarity 72 member B	chr1	0.691925	7.01832	1
ENSG00000134775	FHOD3	formin homology 2 domain containing 3	chr18	-0.384295	7.31067	1
ENSG00000143171	RXRG	retinoid X receptor gamma	chr1	4.00395	7.25891	1.63e-44
ENSG00000144724	PTPRG	protein tyrosine phosphatase, receptor type G	chr3	-2.1885	7.29619	2.24e-18
ENSG00000171940	ZNF217	zinc finger protein 217	chr20	-0.186223	7.24308	1
ENSG00000110066	KMT5B	lysine methyltransferase 5B	chr11	-0.334148	7.87093	1
ENSG00000142156	COL6A1	collagen type VI alpha 1 chain	chr21	-0.341323	8.34072	1
ENSG00000198707	CEP290	centrosomal protein 290	chr12	-0.0184003	7.8791	1
ENSG00000124006	OBSL1	obscurin like 1	chr2	-0.411775	7.95237	1
ENSG00000142173	COL6A2	collagen type VI alpha 2 chain	chr21	-0.313861	7.43092	1
ENSG00000169251	NMD3	NMD3 ribosome export adaptor	chr3	0.00848298	7.37932	1
ENSG00000133739	LRRCC1	leucine rich repeat and coiled-coil centrosomal protein 1	chr8	1.09727	7.06592	0.622141
ENSG00000112983	BRD8	bromodomain containing 8	chr5	-0.314728	7.63886	1
ENSG00000178177	LCORL	ligand dependent nuclear receptor corepressor like	chr4	0.484442	7.71163	1
ENSG00000100439	ABHD4	abhydrolase domain containing 4	chr14	0.350253	7.16608	1
ENSG00000196550	FAM72C	family with sequence similarity 72 member C	NA	0.691032	7.01647	1
ENSG00000130164	MIR6886	microRNA 6886	NA	-0.393938	8.49993	1
ENSG00000167535	CACNB3	calcium voltage-gated channel auxiliary subunit beta 3	chr12	0.158033	7.52995	1
ENSG00000137872	SEMA6D	semaphorin 6D	chr15	-1.43531	6.77387	0.0722461
ENSG00000196123	KIAA0895L	KIAA0895 like	chr16	-0.0303443	7.36912	1
ENSG00000161202	DVL3	dishevelled segment polarity protein 3	chr3	0.431467	8.04773	1
ENSG00000137502	RAB30	RAB30, member RAS oncogene family	chr11	1.05063	7.18813	0.832798
ENSG00000148204	CRB2	crumbs 2, cell polarity complex component	chr9	-3.16017	6.8362	2.3e-30
ENSG00000244509	APOBEC3C	apolipoprotein B mRNA editing enzyme catalytic subunit 3C	chr22	1.90672	7.1345	4.9e-06
ENSG00000003249	DBNDD1	dysbindin domain containing 1	chr16	1.90518	7.12621	5.24e-06
ENSG00000110925	CSRNP2	cysteine and serine rich nuclear protein 2	chr12	0.618289	7.66991	1
ENSG00000130826	MIR664B	microRNA 664b	NA	1.09813	7.55746	0.586323
ENSG00000072210	ALDH3A2	aldehyde dehydrogenase 3 family member A2	chr17	1.14694	7.784	0.330452
ENSG00000243244	STON1	stonin 1	chr2	0.728762	7.11948	1
ENSG00000116649	SRM	spermidine synthase	chr1	1.63879	7.51119	3.31e-05
ENSG00000182934	SRPRA	SRP receptor alpha subunit	chr11	0.421081	7.4174	1
ENSG00000033800	PIAS1	protein inhibitor of activated STAT 1	chr15	-0.0441543	8.18911	1
ENSG00000022267	FHL1	four and a half LIM domains 1	chrX	-0.0933428	7.56452	1
ENSG00000265354	TIMM23	translocase of inner mitochondrial membrane 23	chr10	0.804335	7.48901	1
ENSG00000037965	HOXC8	homeobox C8	chr12	-1.35092	7.31393	0.0177935
ENSG00000186591	UBE2H	ubiquitin conjugating enzyme E2 H	chr7	0.373103	8.55155	1
ENSG00000107521	HPS1	HPS1, biogenesis of lysosomal organelles complex 3 subunit 1	chr10	1.01806	7.1156	0.991913
ENSG00000131153	GINS2	GINS complex subunit 2	chr16	1.04418	7.09473	0.842529
ENSG00000037042	TUBG2	tubulin gamma 2	chr17	0.186892	7.30794	1
ENSG00000115365	LANCL1	LanC like 1	chr2	-0.0891953	7.69925	1
ENSG00000065357	DGKA	diacylglycerol kinase alpha	chr12	0.475082	7.10473	1
ENSG00000125945	ZNF436	zinc finger protein 436	chr1	-0.133473	6.9315	1
ENSG00000189159	JPT1	Jupiter microtubule associated homolog 1	chr17	0.689417	8.17596	1
ENSG00000132970	WASF3	WAS protein family member 3	chr13	-0.345376	7.4396	1
ENSG00000242498	ARPIN	actin-related protein 2/3 complex inhibitor	chr15	1.31216	6.96942	0.123121
ENSG00000240563	L1TD1	LINE1 type transposase domain containing 1	chr1	1.17741	6.88003	0.369193
ENSG00000105810	CDK6	cyclin dependent kinase 6	chr7	0.948389	7.54823	1
ENSG00000009413	REV3L	REV3 like, DNA directed polymerase zeta catalytic subunit	chr6	0.341494	7.78225	1
ENSG00000213694	S1PR3	sphingosine-1-phosphate receptor 3	chr9	-2.75597	6.83529	1.16e-18
ENSG00000163507	KIAA1524	KIAA1524	chr3	0.923835	7.08104	1
ENSG00000087253	LPCAT2	lysophosphatidylcholine acyltransferase 2	chr16	1.46298	6.94312	0.027153
ENSG00000168078	PBK	PDZ binding kinase	chr8	0.290971	7.04916	1
ENSG00000023041	ZDHHC6	zinc finger DHHC-type containing 6	chr10	0.521921	7.24725	1
ENSG00000183020	AP2A2	adaptor related protein complex 2 alpha 2 subunit	chr11	0.325637	7.94128	1
ENSG00000273706	LHX1	LIM homeobox 1	chr17	2.50223	6.69863	5.81e-10
ENSG00000111731	C2CD5	C2 calcium dependent domain containing 5	chr12	0.323378	7.46747	1
ENSG00000110060	PUS3	pseudouridylate synthase 3	chr11	0.649885	7.01343	1
ENSG00000122042	UBL3	ubiquitin like 3	chr13	1.36362	8.01067	0.00168099
ENSG00000176542	USF3	upstream transcription factor family member 3	chr3	-0.443176	7.21384	1
ENSG00000102081	FMR1	fragile X mental retardation 1	chrX	-1.36419	7.61002	0.00282737
ENSG00000067225	PKM	pyruvate kinase, muscle	chr15	0.914803	9.7306	1
ENSG00000087157	PGS1	phosphatidylglycerophosphate synthase 1	chr17	0.529613	7.1815	1
ENSG00000164574	GALNT10	polypeptide N-acetylgalactosaminyltransferase 10	chr5	1.34775	7.41218	0.024732
ENSG00000247809	NR2F2-AS1	NR2F2 antisense RNA 1	NA	0.696043	7.60442	1
ENSG00000130340	SNX9	sorting nexin 9	chr6	-0.272561	7.29392	1
ENSG00000170927	PKHD1	PKHD1, fibrocystin/polyductin	chr6	2.19644	6.79675	1.67e-06
ENSG00000033867	SLC4A7	solute carrier family 4 member 7	chr3	0.977141	7.92998	1
ENSG00000118496	FBXO30	F-box protein 30	chr6	0.518021	7.33125	1
ENSG00000122359	ANXA11	annexin A11	chr10	1.21148	7.6599	0.128838
ENSG00000230798	FOXD3-AS1	FOXD3 antisense RNA 1 (head to head)	NA	1.565	7.68298	2.23e-05
ENSG00000212694	LINC01089	long intergenic non-protein coding RNA 1089	NA	-0.216747	7.26255	1
ENSG00000109920	FNBP4	formin binding protein 4	chr11	0.269118	8.41943	1
ENSG00000102763	MIR5006	microRNA 5006	NA	0.0218673	7.42464	1
ENSG00000169783	LINGO1	leucine rich repeat and Ig domain containing 1	chr15	-1.21452	7.15285	0.205493
ENSG00000112893	MAN2A1	mannosidase alpha class 2A member 1	chr5	-1.07109	7.589	0.728285
ENSG00000165029	ABCA1	ATP binding cassette subfamily A member 1	chr9	-2.68439	6.79481	2.55e-13
ENSG00000132388	UBE2G1	ubiquitin conjugating enzyme E2 G1	chr17	0.346809	7.82847	1
ENSG00000118733	OLFM3	olfactomedin 3	chr1	-3.44415	6.7449	7.66e-37
ENSG00000147400	CETN2	centrin 2	chrX	-0.185988	7.35352	1
ENSG00000125952	MAX	MYC associated factor X	chr14	0.709851	7.35521	1
ENSG00000196935	SRGAP1	SLIT-ROBO Rho GTPase activating protein 1	chr12	-0.413262	7.27225	1
ENSG00000111726	CMAS	cytidine monophosphate N-acetylneuraminic acid synthetase	chr12	0.545497	7.52408	1
ENSG00000044090	CUL7	cullin 7	chr6	0.461328	7.51258	1
ENSG00000174442	ZWILCH	zwilch kinetochore protein	chr15	0.450866	7.46103	1
ENSG00000126705	AHDC1	AT-hook DNA binding motif containing 1	chr1	-1.19241	7.864	0.0952056
ENSG00000154277	UCHL1	ubiquitin C-terminal hydrolase L1	chr4	-0.000268535	8.81057	1
ENSG00000130177	CDC16	cell division cycle 16	chr13	-0.252812	7.87996	1
ENSG00000185664	PMEL	premelanosome protein	chr12	-1.18253	6.73377	0.397364
ENSG00000157657	ZNF618	zinc finger protein 618	chr9	0.259711	8.30167	1
ENSG00000169213	RAB3B	RAB3B, member RAS oncogene family	chr1	1.08026	7.03051	0.665309
ENSG00000079616	KIF22	kinesin family member 22	chr16	0.417997	7.12089	1
ENSG00000144655	CSRNP1	cysteine and serine rich nuclear protein 1	chr3	-0.150237	6.83624	1
ENSG00000197702	PARVA	parvin alpha	chr11	0.722628	7.10987	1
ENSG00000139168	ZCRB1	zinc finger CCHC-type and RNA binding motif containing 1	chr12	0.635032	7.69255	1
ENSG00000198830	HMGN2	high mobility group nucleosomal binding domain 2	chr1	-0.544521	8.60933	1
ENSG00000187535	IFT140	intraflagellar transport 140	chr16	0.0231167	7.08057	1
ENSG00000103326	CAPN15	calpain 15	chr16	1.18269	7.10155	0.309961
ENSG00000184005	ST6GALNAC3	ST6 N-acetylgalactosaminide alpha-2,6-sialyltransferase 3	chr1	0.878354	7.13591	1
ERCC-00062	NA	NA	NA	0.537177	6.81575	1
ENSG00000168772	CXXC4	CXXC finger protein 4	chr4	-1.63017	7.14066	0.000104514
ENSG00000184677	ZBTB40	zinc finger and BTB domain containing 40	chr1	0.325245	7.14936	1
ENSG00000010219	DYRK4	dual specificity tyrosine phosphorylation regulated kinase 4	chr12	0.819443	7.05774	1
ENSG00000109107	ALDOC	aldolase, fructose-bisphosphate C	chr17	-0.238002	7.56571	1
ENSG00000171467	ZNF318	zinc finger protein 318	chr6	0.473218	7.31744	1
ENSG00000148484	RSU1	Ras suppressor protein 1	chr10	0.534004	7.2702	1
ENSG00000123636	BAZ2B	bromodomain adjacent to zinc finger domain 2B	chr2	0.143187	8.6223	1
ENSG00000255690	TRIL	TLR4 interactor with leucine rich repeats	chr7	-0.852037	7.65361	1
ENSG00000111962	UST	uronyl 2-sulfotransferase	chr6	-2.15589	7.01825	1.35e-11
ENSG00000138107	ACTR1A	ARP1 actin-related protein 1 homolog A, centractin alpha	chr10	0.527774	8.04345	1
ENSG00000173905	GOLIM4	golgi integral membrane protein 4	chr3	-0.19256	7.8657	1
ENSG00000079739	PGM1	phosphoglucomutase 1	chr1	-1.9391	7.36853	5.28e-14
ENSG00000115145	STAM2	signal transducing adaptor molecule 2	chr2	-0.0857996	7.07535	1
ENSG00000018408	WWTR1	WW domain containing transcription regulator 1	chr3	0.826609	7.72056	1
ENSG00000121940	CLCC1	chloride channel CLIC like 1	chr1	0.199454	7.32989	1
ENSG00000167642	SPINT2	serine peptidase inhibitor, Kunitz type 2	chr19	1.36903	6.78739	0.0942203
ENSG00000116667	C1orf21	chromosome 1 open reading frame 21	chr1	1.93498	7.34027	3.13e-08
ENSG00000132639	SNAP25	synaptosome associated protein 25	chr20	0.786047	7.25078	1
ENSG00000184867	ARMCX2	armadillo repeat containing, X-linked 2	chrX	-0.832911	7.27151	1
ENSG00000171365	CLCN5	chloride voltage-gated channel 5	chrX	0.980059	7.3907	1
ENSG00000026025	VIM	vimentin	chr10	-0.500391	11.7626	1
ENSG00000085644	ZNF213	zinc finger protein 213	chr16	0.676361	6.95886	1
ENSG00000106211	HSPB1	heat shock protein family B (small) member 1	chr7	0.66983	7.94846	1
ENSG00000226950	DANCR	differentiation antagonizing non-protein coding RNA	NA	-0.368949	7.50858	1
ENSG00000140987	ZSCAN32	zinc finger and SCAN domain containing 32	chr16	0.257124	6.98057	1
ENSG00000165424	ZCCHC24	zinc finger CCHC-type containing 24	chr10	0.330311	7.99664	1
ENSG00000204580	MIR4640	microRNA 4640	NA	-1.94865	7.16442	3.41e-10
ENSG00000168621	GDNF	glial cell derived neurotrophic factor	chr5	2.58487	6.76084	4.1e-10
ENSG00000198951	NAGA	alpha-N-acetylgalactosaminidase	chr22	0.417049	7.06736	1
ENSG00000130766	SESN2	sestrin 2	chr1	0.377897	7.04652	1
ENSG00000136122	BORA	bora, aurora kinase A activator	chr13	1.06048	6.88665	0.665307
ENSG00000091651	ORC6	origin recognition complex subunit 6	chr16	1.00484	7.31704	1
ENSG00000128849	CGNL1	cingulin like 1	chr15	-3.16254	6.81029	3.77e-31
ENSG00000166435	XRRA1	X-ray radiation resistance associated 1	chr11	0.440303	7.03609	1
ENSG00000135506	OS9	OS9, endoplasmic reticulum lectin	chr12	0.702865	7.99746	1
ENSG00000140543	DET1	de-etiolated homolog 1 (Arabidopsis)	chr15	1.07681	6.95115	0.66121
ENSG00000153902	LGI4	leucine rich repeat LGI family member 4	chr19	3.3473	6.99484	1.07e-23
ENSG00000255529	POLR2M	RNA polymerase II subunit M	chr15	0.198656	7.49423	1
ENSG00000254726	MEX3A	mex-3 RNA binding family member A	chr1	0.730636	9.66998	1
ENSG00000125818	PSMF1	proteasome inhibitor subunit 1	chr20	0.792353	7.72264	1
ENSG00000272333	KMT2B	lysine methyltransferase 2B	chr19	0.533187	7.27525	1
ENSG00000197565	COL4A6	collagen type IV alpha 6 chain	chrX	-2.36099	6.89785	6.91e-13
ENSG00000148426	PROSER2	proline and serine rich 2	chr10	3.00344	6.94545	2.61e-17
ENSG00000125848	FLRT3	fibronectin leucine rich transmembrane protein 3	chr20	0.698821	7.22419	1
ENSG00000135547	HEY2	hes related family bHLH transcription factor with YRPW motif 2	chr6	0.0685054	7.09798	1
ENSG00000100614	PPM1A	protein phosphatase, Mg2+/Mn2+ dependent 1A	chr14	-0.0406819	7.51916	1
ENSG00000138764	CCNG2	cyclin G2	chr4	-0.217746	7.83149	1
ENSG00000086061	DNAJA1	DnaJ heat shock protein family (Hsp40) member A1	chr9	0.57511	8.30278	1
ENSG00000104218	CSPP1	centrosome and spindle pole associated protein 1	chr8	0.208254	7.45866	1
ENSG00000140264	SERF2	small EDRK-rich factor 2	chr15	0.410913	8.53664	1
ENSG00000119729	RHOQ	ras homolog family member Q	chr2	0.0478723	7.66249	1
ENSG00000156103	MMP16	matrix metallopeptidase 16	chr8	0.596771	7.63322	1
ENSG00000112210	RAB23	RAB23, member RAS oncogene family	chr6	0.202239	7.29947	1
ENSG00000129480	DTD2	D-tyrosyl-tRNA deacylase 2 (putative)	chr14	0.472819	6.98268	1
ENSG00000181915	ADO	2-aminoethanethiol dioxygenase	chr10	1.18208	7.40951	0.25355
ENSG00000126804	ZBTB1	zinc finger and BTB domain containing 1	chr14	0.247485	7.16011	1
ENSG00000097007	ABL1	ABL proto-oncogene 1, non-receptor tyrosine kinase	chr9	0.392369	7.66534	1
ENSG00000173674	LOC107984923	eukaryotic translation initiation factor 1A, X-chromosomal	NA	0.260806	8.03158	1
ENSG00000162522	KIAA1522	KIAA1522	chr1	-2.41854	7.00994	7.38e-19
ENSG00000112902	SEMA5A	semaphorin 5A	chr5	-2.23175	6.92564	1.08e-10
ENSG00000157570	TSPAN18	tetraspanin 18	chr11	0.430733	7.58805	1
ENSG00000136367	ZFHX2	zinc finger homeobox 2	chr14	-0.482118	7.09981	1
ENSG00000005882	PDK2	pyruvate dehydrogenase kinase 2	chr17	0.548284	7.04387	1
ENSG00000187266	EPOR	erythropoietin receptor	chr19	0.092932	6.8019	1
ENSG00000113657	DPYSL3	dihydropyrimidinase like 3	chr5	-0.136108	7.98831	1
ENSG00000121211	MND1	meiotic nuclear divisions 1	chr4	0.845558	7.13157	1
ENSG00000197579	TOPORS	TOP1 binding arginine/serine rich protein	chr9	0.130094	7.51152	1
ENSG00000101911	PRPS2	phosphoribosyl pyrophosphate synthetase 2	chrX	1.16668	6.84067	0.369193
ENSG00000007545	CRAMP1	cramped chromatin regulator homolog 1	chr16	0.661229	7.19606	1
ENSG00000138604	GLCE	glucuronic acid epimerase	chr15	-1.5624	7.10916	0.000737116
ENSG00000148948	LRRC4C	leucine rich repeat containing 4C	chr11	1.37516	6.78859	0.0802841
ENSG00000113441	LNPEP	leucyl and cystinyl aminopeptidase	chr5	-0.1539	7.61381	1
ENSG00000112242	E2F3	E2F transcription factor 3	chr6	1.08412	7.53411	0.649281
ENSG00000170921	TANC2	tetratricopeptide repeat, ankyrin repeat and coiled-coil containing 2	chr17	-0.0261035	7.70555	1
ENSG00000063244	U2AF2	U2 small nuclear RNA auxiliary factor 2	chr19	1.28702	7.70952	0.0328003
ENSG00000186814	ZSCAN30	zinc finger and SCAN domain containing 30	chr18	-0.162694	7.22201	1
ENSG00000073111	MCM2	minichromosome maintenance complex component 2	chr3	1.0256	7.44844	1
ENSG00000134709	HOOK1	hook microtubule tethering protein 1	chr1	1.54166	6.91311	0.0102956
ENSG00000111728	ST8SIA1	ST8 alpha-N-acetyl-neuraminide alpha-2,8-sialyltransferase 1	chr12	2.15135	7.25422	3.34e-10
ENSG00000178573	MAF	MAF bZIP transcription factor	chr16	-0.449135	6.83568	1
ENSG00000138180	CEP55	centrosomal protein 55	chr10	0.565815	6.99802	1
ENSG00000095015	MAP3K1	mitogen-activated protein kinase kinase kinase 1	chr5	0.866911	7.54737	1
ENSG00000166478	ZNF143	zinc finger protein 143	chr11	0.167001	7.05305	1
ENSG00000035928	RFC1	replication factor C subunit 1	chr4	0.393021	7.83837	1
ENSG00000152926	ZNF117	zinc finger protein 117	chr7	0.329416	7.45346	1
ENSG00000069702	TGFBR3	transforming growth factor beta receptor 3	chr1	0.919947	7.69193	1
ENSG00000145391	SETD7	SET domain containing lysine methyltransferase 7	chr4	0.277774	7.30347	1
ENSG00000188807	TMEM201	transmembrane protein 201	chr1	0.720202	6.99545	1
ENSG00000162980	ARL5A	ADP ribosylation factor like GTPase 5A	chr2	0.598295	8.10593	1
ENSG00000106290	TAF6	TATA-box binding protein associated factor 6	chr7	0.342721	7.77357	1
ENSG00000215784	FAM72D	family with sequence similarity 72 member D	chr1	0.668173	6.96902	1
ENSG00000140577	CRTC3	CREB regulated transcription coactivator 3	chr15	0.566273	7.28874	1
ENSG00000101871	MID1	midline 1	chrX	-0.205796	7.15185	1
ENSG00000275004	ZNF280B	zinc finger protein 280B	chr22	0.45633	6.98955	1
ENSG00000115504	EHBP1	EH domain binding protein 1	chr2	0.376386	7.68051	1
ENSG00000250133	HOXC-AS2	HOXC cluster antisense RNA 2	NA	-1.09583	7.12172	0.616888
ENSG00000204209	DAXX	death domain associated protein	chr6_dbb_hap3	0.600984	7.39768	1
ENSG00000181026	AEN	apoptosis enhancing nuclease	chr15	1.16422	7.04433	0.360488
ENSG00000101447	FAM83D	family with sequence similarity 83 member D	chr20	0.598945	6.92576	1
ENSG00000213160	PHOSPHO2-KLHL23	PHOSPHO2-KLHL23 readthrough	chr2	0.395369	7.92274	1
ENSG00000087274	ADD1	adducin 1	chr4	0.312862	8.59429	1
ENSG00000136854	STXBP1	syntaxin binding protein 1	chr9	0.326589	7.70715	1
ENSG00000150907	FOXO1	forkhead box O1	chr13	0.826942	7.28454	1
ENSG00000186522	2010-09-01	septin 10	chr2	0.150643	7.7856	1
ENSG00000114573	ATP6V1A	ATPase H+ transporting V1 subunit A	chr3	-0.174909	8.2993	1
ENSG00000181827	RFX7	regulatory factor X7	chr15	-0.234822	7.84717	1
ENSG00000205542	TMSB4X	thymosin beta 4, X-linked	chrX	-0.435148	8.93016	1
ENSG00000147180	ZNF711	zinc finger protein 711	chrX	0.238454	7.5303	1
ENSG00000196230	TUBB	tubulin beta class I	chr6_dbb_hap3	0.603321	11.6045	1
ENSG00000075624	ACTB	actin beta	chr7	0.303708	11.4566	1
ENSG00000130066	SAT1	spermidine/spermine N1-acetyltransferase 1	chrX	1.18106	7.2964	0.259557
ENSG00000112335	SNX3	sorting nexin 3	chr6	0.197222	7.95463	1
ENSG00000198604	BAZ1A	bromodomain adjacent to zinc finger domain 1A	chr14	0.907044	8.44806	1
ENSG00000167380	ZNF226	zinc finger protein 226	chr19	-0.123937	7.08842	1
ENSG00000055163	CYFIP2	cytoplasmic FMR1 interacting protein 2	chr5	0.64523	7.5766	1
ENSG00000127564	PKMYT1	protein kinase, membrane associated tyrosine/threonine 1	chr16	1.55247	6.93399	0.00802458
ENSG00000142627	EPHA2	EPH receptor A2	chr1	0.332867	7.07579	1
ENSG00000135968	GCC2	GRIP and coiled-coil domain containing 2	chr2	0.281694	7.67029	1
ENSG00000130958	SLC35D2	solute carrier family 35 member D2	chr9	0.739041	7.29965	1
ENSG00000140836	ZFHX3	zinc finger homeobox 3	chr16	0.706844	8.6705	1
ENSG00000007866	TEAD3	TEA domain transcription factor 3	chr6	0.279191	7.43292	1
ENSG00000156475	PPP2R2B	protein phosphatase 2 regulatory subunit Bbeta	chr5	2.52157	6.95313	3.32e-11
ENSG00000247626	MARS2	methionyl-tRNA synthetase 2, mitochondrial	chr2	0.793215	6.8348	1
ENSG00000158402	CDC25C	cell division cycle 25C	chr5	0.0725316	6.97211	1
ENSG00000143842	SOX13	SRY-box 13	chr1	0.45679	7.19694	1
ENSG00000132780	NASP	nuclear autoantigenic sperm protein	chr1	0.587821	8.64624	1
ENSG00000140307	GTF2A2	general transcription factor IIA subunit 2	chr15	0.410321	7.69401	1
ENSG00000130312	MRPL34	mitochondrial ribosomal protein L34	chr19	0.491233	7.17497	1
ENSG00000189403	HMGB1	high mobility group box 1	chr13	0.472734	10.0211	1
ENSG00000151503	NCAPD3	non-SMC condensin II complex subunit D3	chr11	0.773631	7.2073	1
ENSG00000165304	MELK	maternal embryonic leucine zipper kinase	chr9	0.223722	7.31179	1
ENSG00000198919	DZIP3	DAZ interacting zinc finger protein 3	chr3	-0.25281	7.78917	1
ENSG00000095397	WHRN	whirlin	chr9	0.205094	6.88193	1
ENSG00000198732	SMOC1	SPARC related modular calcium binding 1	chr14	-0.283526	7.12655	1
ENSG00000171223	JUNB	JunB proto-oncogene, AP-1 transcription factor subunit	chr19	0.737741	7.04717	1
ENSG00000150760	DOCK1	dedicator of cytokinesis 1	chr10	0.494576	7.78241	1
ENSG00000232677	LINC00665	long intergenic non-protein coding RNA 665	NA	0.301705	6.84936	1
ENSG00000177879	AP3S1	adaptor related protein complex 3 sigma 1 subunit	chr5	0.268177	7.74303	1
ENSG00000145220	LYAR	Ly1 antibody reactive	chr4	0.852354	7.12528	1
ENSG00000114251	WNT5A	Wnt family member 5A	chr3	-2.86535	6.80022	5.78e-22
ENSG00000112280	COL9A1	collagen type IX alpha 1 chain	chr6	1.38149	7.16928	0.0287047
ENSG00000149084	HSD17B12	hydroxysteroid 17-beta dehydrogenase 12	chr11	0.0393149	7.65993	1
ENSG00000075391	RASAL2	RAS protein activator like 2	chr1	0.440361	7.42333	1
ENSG00000154359	LONRF1	LON peptidase N-terminal domain and ring finger 1	chr8	0.233899	7.36227	1
ENSG00000165495	PKNOX2	PBX/knotted 1 homeobox 2	chr11	-0.379028	7.42254	1
ENSG00000196922	ZNF252P	zinc finger protein 252, pseudogene	chr8	0.158896	7.04887	1
ENSG00000113522	RAD50	RAD50 double strand break repair protein	chr5	0.701764	6.9024	1
ENSG00000116852	KIF21B	kinesin family member 21B	chr1	1.49911	7.15855	0.00550846
ENSG00000147130	ZMYM3	zinc finger MYM-type containing 3	chrX	0.631441	8.31259	1
ENSG00000135052	GOLM1	golgi membrane protein 1	chr9	-0.398787	8.16441	1
ENSG00000109458	GAB1	GRB2 associated binding protein 1	chr4	0.3553	7.2242	1
ENSG00000113552	GNPDA1	glucosamine-6-phosphate deaminase 1	chr5	1.42779	7.23616	0.0113475
ENSG00000106789	CORO2A	coronin 2A	chr9	1.07753	7.33121	0.669827
ENSG00000139200	PIANP	PILR alpha associated neural protein	chr12	0.490497	6.91763	1
ENSG00000182256	GABRG3	gamma-aminobutyric acid type A receptor gamma3 subunit	chr15	-2.93965	6.7398	3.99e-22
ENSG00000161542	PRPSAP1	phosphoribosyl pyrophosphate synthetase associated protein 1	chr17	-0.245618	7.69428	1
ENSG00000167770	OTUB1	OTU deubiquitinase, ubiquitin aldehyde binding 1	chr11	0.175298	8.08193	1
ENSG00000173598	NUDT4	nudix hydrolase 4	chr12	1.08724	7.90511	0.580185
ENSG00000182858	ALG12	ALG12, alpha-1,6-mannosyltransferase	chr22	0.265182	7.09289	1
ENSG00000075975	MKRN2	makorin ring finger protein 2	chr3	0.151038	7.28017	1
ENSG00000102804	TSC22D1	TSC22 domain family member 1	chr13	-0.493713	7.94872	1
ENSG00000125885	MCM8	minichromosome maintenance 8 homologous recombination repair factor	chr20	0.854546	7.22197	1
ENSG00000160691	SHC1	SHC adaptor protein 1	chr1	-0.281469	8.07248	1
ENSG00000185088	RPS27L	ribosomal protein S27 like	chr15	0.884027	7.82667	1
ENSG00000083123	BCKDHB	branched chain keto acid dehydrogenase E1 subunit beta	chr6	-0.547672	6.97958	1
ENSG00000144847	IGSF11	immunoglobulin superfamily member 11	chr3	-1.54435	6.92339	0.00354514
ENSG00000112715	VEGFA	vascular endothelial growth factor A	chr6	-0.745604	6.91796	1
ENSG00000175970	MIR4700	microRNA 4700	NA	0.00711014	7.69511	1
ENSG00000141076	UTP4	UTP4, small subunit processome component	chr16	0.674186	7.47581	1
ENSG00000166685	COG1	component of oligomeric golgi complex 1	chr17	-0.0829274	7.25373	1
ENSG00000145632	PLK2	polo like kinase 2	chr5	1.43717	6.98198	0.023664
ENSG00000161048	NAPEPLD	N-acyl phosphatidylethanolamine phospholipase D	chr7	0.748997	7.21548	1
ENSG00000146263	MMS22L	MMS22 like, DNA repair protein	chr6	0.81395	7.33247	1
ENSG00000253293	HOXA10	homeobox A10	chr7	-0.711914	7.44656	1
ENSG00000170385	SLC30A1	solute carrier family 30 member 1	chr1	-0.0029236	6.93824	1
ENSG00000131873	CHSY1	chondroitin sulfate synthase 1	chr15	-0.125918	7.70153	1
ENSG00000110400	NECTIN1	nectin cell adhesion molecule 1	chr11	-1.25474	6.98634	0.157996
ENSG00000145423	SFRP2	secreted frizzled related protein 2	chr4	-1.43281	6.89859	0.0243278
ENSG00000110651	CD81	CD81 molecule	chr11	0.731611	8.65815	1
ENSG00000128050	PAICS	phosphoribosylaminoimidazole carboxylase and phosphoribosylaminoimidazolesuccinocarboxamide synthase	chr4	0.456622	8.62744	1
ENSG00000120068	HOXB8	homeobox B8	chr17	0.469681	7.40625	1
ENSG00000184992	BRI3BP	BRI3 binding protein	chr12	0.27105	7.20108	1
ENSG00000167182	SP2	Sp2 transcription factor	chr17	0.34502	7.05285	1
ENSG00000163728	TTC14	tetratricopeptide repeat domain 14	chr3	0.39071	7.4017	1
ENSG00000134533	RERG	RAS like estrogen regulated growth inhibitor	chr12	0.656379	6.92889	1
ENSG00000149131	SERPING1	serpin family G member 1	chr11	-0.954003	7.42512	1
ENSG00000115170	ACVR1	activin A receptor type 1	chr2	-0.383419	7.0243	1
ENSG00000143195	ILDR2	immunoglobulin like domain containing receptor 2	chr1	-2.79381	6.78037	3.9e-20
ENSG00000169992	NLGN2	neuroligin 2	chr17	0.742099	8.93281	1
ENSG00000119403	PHF19	PHD finger protein 19	chr9	1.76155	7.03211	0.000131638
ENSG00000122257	RBBP6	RB binding protein 6, ubiquitin ligase	chr16	0.57726	8.62056	1
ENSG00000047634	SCML1	sex comb on midleg like 1 (Drosophila)	chrX	0.911266	7.66784	1
ENSG00000062716	MIR21	microRNA 21	NA	0.391043	7.63394	1
ENSG00000163513	TGFBR2	transforming growth factor beta receptor 2	chr3	1.63009	7.16933	0.000687222
ENSG00000143614	GATAD2B	GATA zinc finger domain containing 2B	chr1	0.29315	7.63781	1
ENSG00000266412	NCOA4	nuclear receptor coactivator 4	chr10	0.312269	8.16028	1
ENSG00000051341	POLQ	DNA polymerase theta	chr3	0.766661	7.04544	1
ENSG00000175322	ZNF519	zinc finger protein 519	chr18	0.56913	7.17225	1
ENSG00000144136	SLC20A1	solute carrier family 20 member 1	chr2	0.259475	7.4692	1
ENSG00000130429	ARPC1B	actin related protein 2/3 complex subunit 1B	chr7	1.59039	7.97865	1.07e-07
ENSG00000171793	CTPS1	CTP synthase 1	chr1	0.990721	7.37413	1
ENSG00000197933	ZNF823	zinc finger protein 823	chr19	0.0598097	6.69879	1
ENSG00000109756	RAPGEF2	Rap guanine nucleotide exchange factor 2	chr4	-0.435864	7.2432	1
ENSG00000005108	THSD7A	thrombospondin type 1 domain containing 7A	chr7	-0.881041	6.88454	1
ENSG00000114861	FOXP1	forkhead box P1	chr3	0.321283	7.577	1
ENSG00000183735	TBK1	TANK binding kinase 1	chr12	0.381228	7.22633	1
ENSG00000172164	SNTB1	syntrophin beta 1	chr8	2.38259	6.86442	3.08e-09
ENSG00000168575	SLC20A2	solute carrier family 20 member 2	chr8	-1.86725	7.19083	5.83e-09
ENSG00000165792	METTL17	methyltransferase like 17	chr14	0.577477	7.27885	1
ENSG00000245694	LOC101927480	uncharacterized LOC101927480	NA	-1.47642	7.04533	0.00666967
ENSG00000177889	UBE2N	ubiquitin conjugating enzyme E2 N	chr12	0.613028	8.14773	1
ENSG00000165480	SKA3	spindle and kinetochore associated complex subunit 3	chr13	0.391345	6.94435	1
ENSG00000096093	EFHC1	EF-hand domain containing 1	chr6	-0.0780058	7.19461	1
ENSG00000278535	DHRS11	dehydrogenase/reductase 11	chr17	0.445039	6.79085	1
ENSG00000169635	HIC2	HIC ZBTB transcriptional repressor 2	chr22	0.0972873	7.74162	1
ENSG00000123200	ZC3H13	zinc finger CCCH-type containing 13	chr13	0.804605	8.97777	1
ENSG00000268606	MAGEA2	MAGE family member A2	chrX	0.0755111	7.58739	1
ENSG00000133710	SPINK5	serine peptidase inhibitor, Kazal type 5	chr5	-0.186881	6.79769	1
ENSG00000186260	MKL2	MKL1/myocardin like 2	chr16	-0.232328	7.51982	1
ENSG00000276023	DUSP14	dual specificity phosphatase 14	chr17	0.86704	7.19141	1
ENSG00000166888	STAT6	signal transducer and activator of transcription 6	chr12	0.356033	7.30718	1
ENSG00000136156	ITM2B	integral membrane protein 2B	chr13	0.594543	9.51698	1
ENSG00000123219	CENPK	centromere protein K	chr5	0.803921	7.08605	1
ENSG00000161904	LEMD2	LEM domain containing 2	chr6	0.319202	7.44562	1
ENSG00000160813	PPP1R35	protein phosphatase 1 regulatory subunit 35	chr7	1.6572	6.85591	0.00257026
ENSG00000050405	LIMA1	LIM domain and actin binding 1	chr12	0.281792	7.58416	1
ENSG00000273344	PAXIP1-AS1	PAXIP1 antisense RNA 1 (head to head)	chr7	1.09496	6.79231	0.519762
ENSG00000183044	ABAT	4-aminobutyrate aminotransferase	chr16	-1.11358	7.15589	0.528074
ENSG00000169860	P2RY1	purinergic receptor P2Y1	chr3	2.26828	7.11883	1.66e-10
ENSG00000139998	RAB15	RAB15, member RAS oncogene family	chr14	0.396069	6.86925	1
ENSG00000263513	FAM72C	family with sequence similarity 72 member C	NA	0.551257	6.98007	1
ENSG00000114019	AMOTL2	angiomotin like 2	chr3	0.14033	7.40603	1
ENSG00000132842	AP3B1	adaptor related protein complex 3 beta 1 subunit	chr5	-0.0470145	7.88901	1
ENSG00000112175	BMP5	bone morphogenetic protein 5	chr6	-2.35994	6.92821	2.88e-15
ENSG00000196305	IARS	isoleucyl-tRNA synthetase	chr9	0.0974571	8.21766	1
ENSG00000277258	PCGF2	polycomb group ring finger 2	chr17	0.731533	8.36038	1
ENSG00000143815	LBR	lamin B receptor	chr1	-0.0263957	8.01335	1
ENSG00000004777	ARHGAP33	Rho GTPase activating protein 33	chr19	0.817209	7.29547	1
ENSG00000152518	ZFP36L2	ZFP36 ring finger protein like 2	chr2	0.372037	7.68286	1
ENSG00000138080	EMILIN1	elastin microfibril interfacer 1	chr2	-1.55082	7.02374	0.00170197
ENSG00000169129	AFAP1L2	actin filament associated protein 1 like 2	chr10	1.46803	7.74564	0.000272719
ENSG00000166233	ARIH1	ariadne RBR E3 ubiquitin protein ligase 1	chr15	0.122173	7.80452	1
ENSG00000170264	FAM161A	family with sequence similarity 161 member A	chr2	0.385279	7.34611	1
ENSG00000118217	ATF6	activating transcription factor 6	chr1	0.743123	7.52046	1
ENSG00000182718	ANXA2	annexin A2	chr15	-0.158864	8.73349	1
ENSG00000196812	ZSCAN16	zinc finger and SCAN domain containing 16	chr6	0.0297666	6.76803	1
ENSG00000100243	CYB5R3	cytochrome b5 reductase 3	chr22	0.453396	8.28273	1
ENSG00000205571	SMN1	survival of motor neuron 1, telomeric	chr5	0.638083	7.57938	1
ENSG00000182220	ATP6AP2	ATPase H+ transporting accessory protein 2	chrX	0.116061	7.73657	1
ENSG00000111602	TIMELESS	timeless circadian clock	chr12	0.194904	7.35178	1
ENSG00000103264	FBXO31	F-box protein 31	chr16	0.164613	6.90238	1
ENSG00000163132	MSX1	msh homeobox 1	chr4	-1.85086	6.75459	0.000158897
ENSG00000146013	GFRA3	GDNF family receptor alpha 3	chr5	2.44833	7.12565	4.93e-13
ENSG00000117360	PRPF3	pre-mRNA processing factor 3	chr1	0.692671	7.29576	1
ENSG00000132507	EIF5A	eukaryotic translation initiation factor 5A	chr17	0.750734	8.43715	1
ENSG00000110395	CBL	Cbl proto-oncogene	chr11	0.640659	7.86653	1
ENSG00000170871	KIAA0232	KIAA0232	chr4	0.126927	7.85525	1
ENSG00000143341	HMCN1	hemicentin 1	chr1	0.73332	7.47854	1
ENSG00000055950	MRPL43	mitochondrial ribosomal protein L43	chr10	-0.0701159	7.28761	1
ENSG00000135966	TGFBRAP1	transforming growth factor beta receptor associated protein 1	chr2	0.596458	7.21873	1
ENSG00000145734	BDP1	B double prime 1, subunit of RNA polymerase III transcription initiation factor IIIB	chr5	-0.0298296	8.04838	1
ENSG00000167397	VKORC1	vitamin K epoxide reductase complex subunit 1	chr16	0.788743	7.59664	1
ENSG00000244879	MIR4712	microRNA 4712	NA	0.139206	8.70129	1
ENSG00000144645	OSBPL10	oxysterol binding protein like 10	chr3	1.28437	7.1515	0.100034
ENSG00000148943	LIN7C	lin-7 homolog C, crumbs cell polarity complex component	chr11	0.0835367	7.50694	1
ENSG00000163428	LRRC58	leucine rich repeat containing 58	chr3	0.680797	8.44174	1
ENSG00000146122	DAAM2	dishevelled associated activator of morphogenesis 2	chr6	1.01201	7.17569	1
ENSG00000120137	PANK3	pantothenate kinase 3	chr5	0.125604	8.67744	1
ENSG00000152952	PLOD2	procollagen-lysine,2-oxoglutarate 5-dioxygenase 2	chr3	-0.675069	7.23696	1
ENSG00000174371	EXO1	exonuclease 1	chr1	1.06424	6.83014	0.612652
ENSG00000176406	RIMS2	regulating synaptic membrane exocytosis 2	chr8	1.29779	6.82121	0.123503
ENSG00000051108	HERPUD1	homocysteine inducible ER protein with ubiquitin like domain 1	chr16	-0.514351	6.94753	1
ENSG00000131080	EDA2R	ectodysplasin A2 receptor	chrX	1.4024	6.81959	0.0507429
ENSG00000132846	ZBED3	zinc finger BED-type containing 3	chr5	0.28215	7.16134	1
ENSG00000189184	PCDH18	protocadherin 18	chr4	-1.11554	7.2299	0.501654
ENSG00000130749	ZC3H4	zinc finger CCCH-type containing 4	chr19	0.219948	7.68111	1
ENSG00000171067	C11orf24	chromosome 11 open reading frame 24	chr11	0.833142	7.12684	1
ENSG00000158859	ADAMTS4	ADAM metallopeptidase with thrombospondin type 1 motif 4	chr1	1.53317	6.85609	0.00987664
ENSG00000013306	SLC25A39	solute carrier family 25 member 39	chr17	0.718087	7.79029	1
ENSG00000174943	KCTD13	potassium channel tetramerization domain containing 13	chr16	1.08481	6.89969	0.583608
ENSG00000106603	COA1	cytochrome c oxidase assembly factor 1 homolog	chr7	0.48249	7.81576	1
ENSG00000140848	CPNE2	copine 2	chr16	0.687505	7.42607	1
ENSG00000280018	LINC01670	long intergenic non-protein coding RNA 1670	NA	0.73291	7.1179	1
ENSG00000121621	KIF18A	kinesin family member 18A	chr11	0.364067	6.95542	1
ENSG00000125827	TMX4	thioredoxin related transmembrane protein 4	chr20	-0.542173	7.30562	1
ENSG00000183305	MAGEA2B	MAGE family member A2B	NA	0.0720552	7.57771	1
ENSG00000133703	KRAS	KRAS proto-oncogene, GTPase	chr12	-0.0530123	7.6399	1
ENSG00000130635	COL5A1	collagen type V alpha 1 chain	chr9	-1.10733	7.1578	0.54544
ENSG00000205336	ADGRG1	adhesion G protein-coupled receptor G1	chr16	1.50856	6.96685	0.00994878
ENSG00000186472	PCLO	piccolo presynaptic cytomatrix protein	chr7	-0.730833	6.89932	1
ENSG00000155903	RASA2	RAS p21 protein activator 2	chr3	0.585379	7.59549	1
ENSG00000141441	GAREM1	GRB2 associated regulator of MAPK1 subtype 1	chr18	2.15009	7.08886	1.23e-08
ENSG00000008130	NADK	NAD kinase	chr1	0.371594	7.54413	1
ENSG00000101367	MAPRE1	microtubule associated protein RP/EB family member 1	chr20	0.163672	8.29709	1
ENSG00000166025	AMOTL1	angiomotin like 1	chr11	-0.514848	7.55024	1
ENSG00000089876	DHX32	DEAH-box helicase 32 (putative)	chr10	0.396446	7.3013	1
ENSG00000131002	TXLNGY	taxilin gamma pseudogene, Y-linked	NA	0.461079	7.73074	1
ENSG00000153561	RMND5A	required for meiotic nuclear division 5 homolog A	chr2	0.254572	7.568	1
ENSG00000197043	ANXA6	annexin A6	chr5	-0.433679	8.24317	1
ENSG00000135164	DMTF1	cyclin D binding myb like transcription factor 1	chr7	0.0385892	7.73051	1
ENSG00000104177	MYEF2	myelin expression factor 2	chr15	0.207444	8.27697	1
ENSG00000274180	NATD1	N-acetyltransferase domain containing 1	chr17	0.306555	6.73275	1
ENSG00000050165	DKK3	dickkopf WNT signaling pathway inhibitor 3	chr11	0.197579	6.96587	1
ENSG00000128594	LRRC4	leucine rich repeat containing 4	chr7	1.5394	7.21393	0.00186556
ENSG00000067955	CBFB	core-binding factor beta subunit	chr16	0.542422	7.83767	1
ENSG00000079102	RUNX1T1	RUNX1 translocation partner 1	chr8	-0.116449	6.72499	1
ENSG00000173801	JUP	junction plakoglobin	chr17	-0.425707	7.44426	1
ENSG00000120162	MOB3B	MOB kinase activator 3B	chr9	1.01992	7.21399	0.979159
ENSG00000085185	BCORL1	BCL6 corepressor like 1	chrX	0.956616	7.82042	1
ENSG00000103449	SALL1	spalt like transcription factor 1	chr16	-2.61029	6.7894	5.66e-17
ENSG00000107745	MICU1	mitochondrial calcium uptake 1	chr10	0.296516	7.61211	1
ENSG00000233098	LOC105369205	uncharacterized LOC105369205	NA	-0.190319	8.151	1
ENSG00000204262	COL5A2	collagen type V alpha 2 chain	chr2	0.420606	8.8782	1
ENSG00000107560	RAB11FIP2	RAB11 family interacting protein 2	chr10	-0.832512	7.21582	1
ENSG00000182150	ERCC6L2	ERCC excision repair 6 like 2	chr9	-0.419788	7.26145	1
ENSG00000075420	FNDC3B	fibronectin type III domain containing 3B	chr3	-1.24884	7.60881	0.0488278
ENSG00000227051	C14orf132	chromosome 14 open reading frame 132	chr14	0.586045	7.59536	1
ENSG00000172888	ZNF621	zinc finger protein 621	chr3	-0.1004	7.27055	1
ENSG00000120686	UFM1	ubiquitin fold modifier 1	chr13	-0.109554	7.34018	1
ENSG00000087263	OGFOD1	2-oxoglutarate and iron dependent oxygenase domain containing 1	chr16	0.0519062	7.29516	1
ENSG00000072864	NDE1	nudE neurodevelopment protein 1	chr16	1.01881	6.99429	0.924068
ENSG00000126870	WDR60	WD repeat domain 60	chr7	0.296246	7.43299	1
ENSG00000119280	C1orf198	chromosome 1 open reading frame 198	chr1	1.19674	7.76003	0.143332
ENSG00000115525	ST3GAL5	ST3 beta-galactoside alpha-2,3-sialyltransferase 5	chr2	0.913019	7.32263	1
ENSG00000101361	MIR1292	microRNA 1292	NA	0.234122	7.95103	1
ENSG00000121957	GPSM2	G-protein signaling modulator 2	chr1	-0.0958006	7.26666	1
ENSG00000083444	PLOD1	procollagen-lysine,2-oxoglutarate 5-dioxygenase 1	chr1	-1.55747	7.22764	0.000108619
ENSG00000166432	ZMAT1	zinc finger matrin-type 1	chrX	0.937857	6.82367	1
ENSG00000138796	HADH	hydroxyacyl-CoA dehydrogenase	chr4	0.898169	7.47984	1
ENSG00000015171	ZMYND11	zinc finger MYND-type containing 11	chr10	0.365439	7.51774	1
ENSG00000169914	OTUD3	OTU deubiquitinase 3	chr1	0.646942	7.00853	1
ENSG00000105879	CBLL1	Cbl proto-oncogene like 1	chr7	0.265788	7.12692	1
ENSG00000184752	NDUFA12	NADH:ubiquinone oxidoreductase subunit A12	chr12	0.525428	7.20961	1
ENSG00000122484	RPAP2	RNA polymerase II associated protein 2	chr1	0.156711	7.49983	1
ENSG00000150961	SEC24D	SEC24 homolog D, COPII coat complex component	chr4	-0.961844	7.10487	1
ENSG00000110031	LPXN	leupaxin	chr11	-0.0161163	6.68517	1
ENSG00000144857	BOC	BOC cell adhesion associated, oncogene regulated	chr3	-2.67352	6.79174	9.89e-19
ENSG00000100354	TNRC6B	trinucleotide repeat containing 6B	chr22	0.192953	8.25301	1
ENSG00000154217	PITPNC1	phosphatidylinositol transfer protein, cytoplasmic 1	chr17	1.60853	6.99334	0.00231857
ENSG00000114503	NCBP2	nuclear cap binding protein subunit 2	chr3	0.669139	7.90627	1
ENSG00000166326	TRIM44	tripartite motif containing 44	chr11	0.182853	8.26931	1
ENSG00000148175	STOM	stomatin	chr9	0.284372	6.71458	1
ENSG00000090863	GLG1	golgi glycoprotein 1	chr16	-0.458557	8.56006	1
ENSG00000204673	AKT1S1	AKT1 substrate 1	chr19	0.655708	7.16192	1
ENSG00000164327	RICTOR	RPTOR independent companion of MTOR complex 2	chr5	0.476519	7.52125	1
ENSG00000102144	PGK1	phosphoglycerate kinase 1	chrX	0.212834	8.23015	1
ENSG00000090006	LTBP4	latent transforming growth factor beta binding protein 4	chr19	0.256218	8.00858	1
ENSG00000012817	KDM5D	lysine demethylase 5D	chrY	0.177841	7.32724	1
ENSG00000132819	RBM38	RNA binding motif protein 38	chr20	0.536488	7.20276	1
ENSG00000134717	BTF3L4	basic transcription factor 3 like 4	chr1	0.2909	7.77689	1
ENSG00000197256	KANK2	KN motif and ankyrin repeat domains 2	chr19	0.412154	7.01949	1
ENSG00000213762	ZNF134	zinc finger protein 134	chr19	-0.262792	6.99395	1
ENSG00000127603	MACF1	microtubule-actin crosslinking factor 1	chr1	-0.595989	8.50604	1
ENSG00000141431	ASXL3	additional sex combs like 3, transcriptional regulator	chr18	-0.52846	7.00948	1
ENSG00000177663	IL17RA	interleukin 17 receptor A	chr22	0.651386	6.85774	1
ENSG00000163249	MIR4775	microRNA 4775	NA	0.212637	7.09511	1
ENSG00000092607	TBX15	T-box 15	chr1	-3.00013	6.64719	1.99e-22
ENSG00000148516	ZEB1	zinc finger E-box binding homeobox 1	chr10	-1.13453	7.29098	0.377069
ENSG00000143702	CEP170P1	centrosomal protein 170 pseudogene 1	chr4	0.242871	8.29212	1
ENSG00000170571	EMB	embigin	chr5	1.13266	7.09059	0.436011
ENSG00000133639	BTG1	BTG anti-proliferation factor 1	chr12	0.341168	8.26148	1
ENSG00000020922	MRE11	MRE11 homolog, double strand break repair nuclease	chr11	1.10646	7.19006	0.523346
ENSG00000108256	NUFIP2	NUFIP2, FMR1 interacting protein 2	chr17	0.236271	8.17952	1
ENSG00000177042	TMEM80	transmembrane protein 80	chr11	0.199376	6.89556	1
ENSG00000023839	ABCC2	ATP binding cassette subfamily C member 2	chr10	0.631099	7.19766	1
ENSG00000101745	ANKRD12	ankyrin repeat domain 12	chr18	0.154153	8.40873	1
ENSG00000115828	QPCT	glutaminyl-peptide cyclotransferase	chr2	2.03261	6.87709	3.69e-06
ENSG00000259417	LINC01314	long intergenic non-protein coding RNA 1314	NA	2.66877	6.73458	8.18e-14
ENSG00000117394	SLC2A1	solute carrier family 2 member 1	chr1	-1.98996	6.80496	9.47e-07
ENSG00000127511	SIN3B	SIN3 transcription regulator family member B	chr19	-0.00467532	7.42273	1
ENSG00000144369	FAM171B	family with sequence similarity 171 member B	chr2	-1.20804	6.94927	0.219037
ENSG00000181019	NQO1	NAD(P)H quinone dehydrogenase 1	chr16	-2.04775	6.95643	1.49e-09
ENSG00000127328	RAB3IP	RAB3A interacting protein	chr12	-0.646568	7.05906	1
ENSG00000196972	SMIM10L2B	small integral membrane protein 10 like 2B	NA	0.530683	6.66481	1
ENSG00000151498	ACAD8	acyl-CoA dehydrogenase family member 8	chr11	0.533395	6.95806	1
ENSG00000135677	GNS	glucosamine (N-acetyl)-6-sulfatase	chr12	-0.60613	7.66508	1
ENSG00000131368	MRPS25	mitochondrial ribosomal protein S25	chr3	0.549514	7.42815	1
ENSG00000167513	CDT1	chromatin licensing and DNA replication factor 1	chr16	0.86021	7.30775	1
ENSG00000138760	SCARB2	scavenger receptor class B member 2	chr4	0.803611	8.46458	1
ENSG00000153234	NR4A2	nuclear receptor subfamily 4 group A member 2	chr2	2.28899	6.72975	3.86e-08
ENSG00000163001	CFAP36	cilia and flagella associated protein 36	chr2	-0.0302607	7.30767	1
ENSG00000206530	CFAP44	cilia and flagella associated protein 44	chr3	0.183777	6.93228	1
ENSG00000103852	TTC23	tetratricopeptide repeat domain 23	chr15	0.227088	7.21767	1
ENSG00000156675	RAB11FIP1	RAB11 family interacting protein 1	chr8	-0.467996	6.98064	1
ENSG00000244462	RBM12	RNA binding motif protein 12	chr20	0.257573	7.74761	1
ENSG00000256463	SALL3	spalt like transcription factor 3	chr18	-3.19752	6.68942	5.45e-31
ENSG00000107890	ANKRD26	ankyrin repeat domain 26	chr10	0.0797638	7.90203	1
ENSG00000152270	PDE3B	phosphodiesterase 3B	chr11	0.651055	7.23234	1
ENSG00000099901	RANBP1	RAN binding protein 1	chr22	0.442761	7.87165	1
ENSG00000176022	B3GALT6	beta-1,3-galactosyltransferase 6	chr1	0.516629	7.14602	1
ENSG00000138722	MMRN1	multimerin 1	chr4	-0.258289	7.0251	1
ENSG00000145332	KLHL8	kelch like family member 8	chr4	0.101524	7.31798	1
ENSG00000110042	DTX4	deltex E3 ubiquitin ligase 4	chr11	-0.85467	6.93074	1
ENSG00000185745	IFIT1	interferon induced protein with tetratricopeptide repeats 1	chr10	0.608647	6.81945	1
ENSG00000130520	LSM4	LSM4 homolog, U6 small nuclear RNA and mRNA degradation associated	chr19	0.425083	8.02721	1
ENSG00000147416	ATP6V1B2	ATPase H+ transporting V1 subunit B2	chr8	-0.11907	7.92297	1
ENSG00000163867	ZMYM6	zinc finger MYM-type containing 6	chr1	0.214459	6.96993	1
ENSG00000166963	MAP1A	microtubule associated protein 1A	chr15	-0.720324	7.58191	1
ENSG00000167468	GPX4	glutathione peroxidase 4	chr19	0.392391	8.12299	1
ENSG00000162702	ZNF281	zinc finger protein 281	chr1	0.146343	8.03342	1
ENSG00000139793	MBNL2	muscleblind like splicing regulator 2	chr13	0.515361	7.51928	1
ENSG00000150551	LYPD1	LY6/PLAUR domain containing 1	chr2	-0.673996	6.6929	1
ENSG00000169756	LIMS1	LIM zinc finger domain containing 1	chr2	-0.304187	7.69983	1
ENSG00000139618	BRCA2	BRCA2, DNA repair associated	chr13	0.909643	7.04318	1
ENSG00000247746	USP51	ubiquitin specific peptidase 51	chrX	0.343524	7.01864	1
ENSG00000177084	POLE	DNA polymerase epsilon, catalytic subunit	chr12	0.544167	7.2601	1
ENSG00000213551	DNAJC9	DnaJ heat shock protein family (Hsp40) member C9	chr10	0.630819	7.47751	1
ENSG00000163040	CCDC74A	coiled-coil domain containing 74A	chr2	-0.685778	7.03756	1
ENSG00000165617	DACT1	dishevelled binding antagonist of beta catenin 1	chr14	-0.849479	6.95894	1
ENSG00000182272	B4GALNT4	beta-1,4-N-acetyl-galactosaminyltransferase 4	chr11	0.578014	7.73446	1
ENSG00000089472	HEPH	hephaestin	chrX	-1.74856	6.83002	0.000108619
ENSG00000196668	LINC00173	long intergenic non-protein coding RNA 173	NA	-0.867092	6.80041	1
ENSG00000178568	ERBB4	erb-b2 receptor tyrosine kinase 4	chr2	2.38129	6.85161	2.93e-09
ENSG00000272325	NUDT3	nudix hydrolase 3	chr6	0.5473	8.73287	1
ENSG00000163644	PPM1K	protein phosphatase, Mg2+/Mn2+ dependent 1K	chr4	-0.445199	7.18516	1
ENSG00000198756	COLGALT2	collagen beta(1-O)galactosyltransferase 2	chr1	2.32617	7.09852	3.38e-11
ENSG00000076685	NT5C2	5'-nucleotidase, cytosolic II	chr10	-0.0925327	7.49924	1
ENSG00000198554	WDHD1	WD repeat and HMG-box DNA binding protein 1	chr14	0.63966	7.19086	1
ENSG00000164684	ZNF704	zinc finger protein 704	chr8	0.919917	7.25304	1
ENSG00000197157	SND1	staphylococcal nuclease and tudor domain containing 1	chr7	-0.0642065	8.42693	1
ENSG00000125354	2006-09-01	septin 6	chrX	0.554275	8.25098	1
ENSG00000135002	RFK	riboflavin kinase	chr9	0.776435	7.07278	1
ENSG00000257178	MIR10A	microRNA 10a	NA	-0.803601	7.0627	1
ENSG00000011132	APBA3	amyloid beta precursor protein binding family A member 3	chr19	0.79615	6.81796	1
ENSG00000050438	SLC4A8	solute carrier family 4 member 8	chr12	-2.0382	6.92793	3.93e-09
ENSG00000151632	AKR1C2	aldo-keto reductase family 1 member C2	chr10	-2.26367	6.8298	2.59e-11
ENSG00000100196	KDELR3	KDEL endoplasmic reticulum protein retention receptor 3	chr22	-0.252327	6.93934	1
ENSG00000125703	ATG4C	autophagy related 4C cysteine peptidase	chr1	1.07615	7.10248	0.66121
ENSG00000145781	COMMD10	COMM domain containing 10	chr5	0.0723718	7.08385	1
ENSG00000243279	PRAF2	PRA1 domain family member 2	chrX	0.587926	7.40607	1
ENSG00000160695	VPS11	VPS11, CORVET/HOPS core subunit	chr11	0.964239	7.05124	1
ENSG00000111907	TPD52L1	tumor protein D52 like 1	chr6	-0.283949	7.22203	1
ENSG00000169221	TBC1D10B	TBC1 domain family member 10B	chr16	0.150707	7.35215	1
ENSG00000066117	SMARCD1	SWI/SNF related, matrix associated, actin dependent regulator of chromatin, subfamily d, member 1	chr12	0.524699	7.89408	1
ENSG00000184349	EFNA5	ephrin A5	chr5	-0.808999	7.12537	1
ENSG00000086189	DIMT1	DIM1 dimethyladenosine transferase 1 homolog	chr5	0.643986	7.41094	1
ENSG00000104964	AES	amino-terminal enhancer of split	chr19	1.03004	8.11788	1
ENSG00000136492	BRIP1	BRCA1 interacting protein C-terminal helicase 1	chr17	0.801628	7.00968	1
ENSG00000163029	SMC6	structural maintenance of chromosomes 6	chr2	0.598403	7.74303	1
ENSG00000218336	TENM3	teneurin transmembrane protein 3	chr4	-1.40348	7.43311	0.00186348
ENSG00000215251	FASTKD5	FAST kinase domains 5	chr20	0.522104	6.89258	1
ENSG00000130304	SLC27A1	solute carrier family 27 member 1	chr19	0.504783	7.18668	1
ENSG00000115414	FN1	fibronectin 1	chr2	-0.243913	8.50932	1
ENSG00000133393	FOPNL	FGFR1OP N-terminal like	chr16	-0.0774721	7.2559	1
ENSG00000185009	AP3M1	adaptor related protein complex 3 mu 1 subunit	chr10	0.566925	8.17538	1
ENSG00000154928	EPHB1	EPH receptor B1	chr3	-2.41571	6.78365	1.14e-13
ENSG00000169604	ANTXR1	anthrax toxin receptor 1	chr2	-1.63006	7.23009	7.42e-06
ENSG00000160326	SLC2A6	solute carrier family 2 member 6	chr9	-0.214306	6.97644	1
ENSG00000065911	MTHFD2	methylenetetrahydrofolate dehydrogenase (NADP+ dependent) 2, methenyltetrahydrofolate cyclohydrolase	chr2	-0.399594	7.42671	1
ENSG00000006118	TMEM132A	transmembrane protein 132A	chr11	0.477317	8.49943	1
ENSG00000185432	METTL7A	methyltransferase like 7A	chr12	-1.11944	6.96853	0.49854
ENSG00000182871	COL18A1	collagen type XVIII alpha 1 chain	chr21	-1.29763	7.54579	0.0106881
ENSG00000170004	CHD3	chromodomain helicase DNA binding protein 3	chr17	-0.0401095	7.8678	1
ENSG00000163659	TIPARP	TCDD inducible poly(ADP-ribose) polymerase	chr3	0.376896	6.8589	1
ENSG00000185361	TNFAIP8L1	TNF alpha induced protein 8 like 1	chr19	0.501272	6.81727	1
ENSG00000168461	RAB31	RAB31, member RAS oncogene family	chr18	0.744935	7.65956	1
ENSG00000140548	ZNF710	zinc finger protein 710	chr15	-0.374808	6.96667	1
ENSG00000059804	SLC2A3	solute carrier family 2 member 3	chr12	-1.69338	7.31107	4.29e-07
ENSG00000117461	PIK3R3	phosphoinositide-3-kinase regulatory subunit 3	chr1	-0.610619	7.56352	1
ENSG00000140557	ST8SIA2	ST8 alpha-N-acetyl-neuraminide alpha-2,8-sialyltransferase 2	chr15	0.299556	6.82968	1
ENSG00000100767	PAPLN	papilin, proteoglycan like sulfated glycoprotein	chr14	-2.78974	6.68631	3.9e-20
ENSG00000179820	MYADM	myeloid associated differentiation marker	chr19	-3.05324	6.77593	1.97e-30
ENSG00000129595	EPB41L4A	erythrocyte membrane protein band 4.1 like 4A	chr5	1.8634	6.86434	8.05e-05
ENSG00000140682	TGFB1I1	transforming growth factor beta 1 induced transcript 1	chr16	-0.339651	7.06725	1
ENSG00000143379	SETDB1	SET domain bifurcated 1	chr1	0.118824	7.46148	1
ENSG00000146463	ZMYM4	zinc finger MYM-type containing 4	chr1	0.189686	8.28137	1
ENSG00000180287	PLD5	phospholipase D family member 5	chr1	-2.10082	6.72999	1.7e-07
ENSG00000281649	EBLN3P	endogenous Bornavirus-like nucleoprotein 3, pseudogene	NA	0.357752	7.25917	1
ENSG00000178295	GEN1	GEN1, Holliday junction 5' flap endonuclease	chr2	0.628436	7.157	1
ENSG00000125962	ARMCX5	armadillo repeat containing, X-linked 5	chrX	-0.611309	6.88216	1
ENSG00000278233	LOC100008587	RNA, 5.8S ribosomal	NA	-1.77926	7.27565	1.74e-08
ENSG00000187741	FANCA	Fanconi anemia complementation group A	chr16	0.450177	7.25893	1
ENSG00000135903	PAX3	paired box 3	chr2	-0.0956662	7.37001	1
ENSG00000197653	DNAH10	dynein axonemal heavy chain 10	chr12	1.4342	6.9484	0.0208708
ENSG00000212747	RTL8B	retrotransposon Gag like 8B	chrX	-0.104089	6.83428	1
ENSG00000134077	THUMPD3	THUMP domain containing 3	chr3	0.588293	6.80519	1
ENSG00000137076	MIR6852	microRNA 6852	NA	0.607026	8.29878	1
ENSG00000048544	MRPS10	mitochondrial ribosomal protein S10	chr6	-0.156417	7.27627	1
ENSG00000165704	HPRT1	hypoxanthine phosphoribosyltransferase 1	chrX	1.00913	7.06915	0.965385
ENSG00000108448	TRIM16L	tripartite motif containing 16 like	chr17	0.733357	7.04297	1
ENSG00000054983	GALC	galactosylceramidase	chr14	-0.256491	7.19683	1
ENSG00000197959	DNM3	dynamin 3	chr1	1.33275	6.77265	0.0809402
ENSG00000162599	NFIA	nuclear factor I A	chr1	-1.17536	6.79839	0.344717
ENSG00000128645	MIR7704	microRNA 7704	NA	-3.04027	6.65575	5.95e-29
ENSG00000158201	ABHD3	abhydrolase domain containing 3	chr18	1.22104	7.01325	0.194065
ENSG00000101557	USP14	ubiquitin specific peptidase 14	chr18	0.249573	8.25222	1
ENSG00000112039	FANCE	Fanconi anemia complementation group E	chr6	0.341842	6.88406	1
ENSG00000087053	MTMR2	myotubularin related protein 2	chr11	0.405401	7.58676	1
ENSG00000186660	ZFP91	ZFP91 zinc finger protein	chr11	0.213287	7.55512	1
ENSG00000039560	RAI14	retinoic acid induced 14	chr5	0.674358	7.34633	1
ENSG00000106785	TRIM14	tripartite motif containing 14	chr9	1.62173	6.83862	0.00245422
ENSG00000176749	CDK5R1	cyclin dependent kinase 5 regulatory subunit 1	chr17	0.4016	7.18364	1
ENSG00000074800	ENO1	enolase 1	chr1	0.171245	9.56088	1
ENSG00000177000	MTHFR	methylenetetrahydrofolate reductase	chr1	-1.04005	7.2609	0.931186
ENSG00000155850	SLC26A2	solute carrier family 26 member 2	chr5	0.673822	7.24438	1
ENSG00000170522	ELOVL6	ELOVL fatty acid elongase 6	chr4	-0.48536	8.17617	1
ENSG00000104133	SPG11	SPG11, spatacsin vesicle trafficking associated	chr15	0.0263278	7.84136	1
ENSG00000006451	RALA	RAS like proto-oncogene A	chr7	0.303591	7.47883	1
ENSG00000019582	CD74	CD74 molecule	chr5	1.58994	6.90676	0.00388522
ENSG00000067334	DNTTIP2	deoxynucleotidyltransferase terminal interacting protein 2	chr1	0.805789	7.40297	1
ENSG00000090372	STRN4	striatin 4	chr19	0.44405	8.07062	1
ENSG00000176171	BNIP3	BCL2 interacting protein 3	chr10	0.436508	7.54702	1
ENSG00000062650	WAPL	WAPL cohesin release factor	chr10	-0.786306	7.79055	1
ENSG00000089693	MLF2	myeloid leukemia factor 2	chr12	0.367245	8.69196	1
ENSG00000104728	ARHGEF10	Rho guanine nucleotide exchange factor 10	chr8	1.32082	7.90619	0.00495125
ENSG00000164106	SCRG1	stimulator of chondrogenesis 1	chr4	0.241551	7.15148	1
ENSG00000100097	LGALS1	galectin 1	chr22	0.372144	6.95632	1
ENSG00000101670	LIPG	lipase G, endothelial type	chr18	-0.620974	6.74482	1
ENSG00000108852	MPP2	membrane palmitoylated protein 2	chr17	0.414921	7.07535	1
ENSG00000204519	ZNF551	zinc finger protein 551	chr19	1.08121	6.85958	0.562801
ENSG00000136935	GOLGA1	golgin A1	chr9	0.000960013	7.02033	1
ENSG00000101452	DHX35	DEAH-box helicase 35	chr20	0.286551	6.92198	1
ENSG00000245526	MIR9-2	microRNA 9-2	NA	2.86265	6.80253	9.1e-16
ENSG00000203950	RTL8A	retrotransposon Gag like 8A	chrX	0.419364	7.49965	1
ENSG00000075568	TMEM131	transmembrane protein 131	chr2	-0.227871	7.77306	1
ENSG00000237765	FAM200B	family with sequence similarity 200 member B	chr4	0.528356	7.1138	1
ENSG00000139620	KANSL2	KAT8 regulatory NSL complex subunit 2	chr12	0.568761	7.16664	1
ENSG00000063169	BICRA	BRD4 interacting chromatin remodelling complex associated protein	chr19	-0.0468552	7.11219	1
ENSG00000162729	IGSF8	immunoglobulin superfamily member 8	chr1	0.40816	7.48517	1
ENSG00000139734	DIAPH3	diaphanous related formin 3	chr13	0.171282	6.94226	1
ENSG00000163453	IGFBP7	insulin like growth factor binding protein 7	chr4	-1.03064	6.79557	0.79818
ENSG00000076248	UNG	uracil DNA glycosylase	chr12	0.294759	7.0411	1
ENSG00000004897	CDC27	cell division cycle 27	chr17	-0.0807855	7.88444	1
ENSG00000197417	SHPK	sedoheptulokinase	chr17	0.933763	6.93821	1
ENSG00000132002	DNAJB1	DnaJ heat shock protein family (Hsp40) member B1	chr19	0.651305	7.63879	1
ENSG00000144048	DUSP11	dual specificity phosphatase 11	chr2	0.251439	7.04946	1
ENSG00000004478	FKBP4	FK506 binding protein 4	chr12	1.08176	7.39775	0.649622
ENSG00000145545	SRD5A1	steroid 5 alpha-reductase 1	chr5	0.799739	7.07878	1
ENSG00000165898	ISCA2	iron-sulfur cluster assembly 2	chr14	-0.294511	6.97099	1
ENSG00000161791	FMNL3	formin like 3	chr12	1.09306	7.19457	0.56518
ENSG00000197324	LRP10	LDL receptor related protein 10	chr14	-0.0415639	7.5509	1
ENSG00000147419	CCDC25	coiled-coil domain containing 25	chr8	-0.0498989	7.42652	1
ENSG00000148019	CEP78	centrosomal protein 78	chr9	0.320871	7.81935	1
ENSG00000101236	RNF24	ring finger protein 24	chr20	0.466986	7.41953	1
ENSG00000135521	LTV1	LTV1 ribosome biogenesis factor	chr6	0.774611	7.18888	1
ENSG00000143641	GALNT2	polypeptide N-acetylgalactosaminyltransferase 2	chr1	-0.223733	7.6081	1
ENSG00000182463	TSHZ2	teashirt zinc finger homeobox 2	chr20	0.261703	7.488	1
ENSG00000140995	DEF8	differentially expressed in FDCP 8 homolog	chr16	0.852159	7.23593	1
ENSG00000112245	PTP4A1	protein tyrosine phosphatase type IVA, member 1	chr6	-0.627683	7.80393	1
ENSG00000087086	FTL	ferritin light chain	chr19	0.459132	8.94089	1
ENSG00000164904	ALDH7A1	aldehyde dehydrogenase 7 family member A1	chr5	0.536063	8.76907	1
ENSG00000129292	PHF20L1	PHD finger protein 20-like 1	chr8	0.0403593	7.95329	1
ENSG00000078237	TIGAR	TP53 induced glycolysis regulatory phosphatase	chr12	0.69566	6.87096	1
ENSG00000080503	SMARCA2	SWI/SNF related, matrix associated, actin dependent regulator of chromatin, subfamily a, member 2	chr9	0.915146	7.00456	1
ENSG00000113649	TCERG1	transcription elongation regulator 1	chr5	0.300719	8.45472	1
ENSG00000138376	BARD1	BRCA1 associated RING domain 1	chr2	0.0812293	7.37119	1
ENSG00000100883	SRP54	signal recognition particle 54	chr14	0.365992	7.57633	1
ENSG00000126249	PDCD2L	programmed cell death 2 like	chr19	0.503428	6.72091	1
ENSG00000175387	SMAD2	SMAD family member 2	chr18	-0.0116991	8.147	1
ENSG00000141576	RNF157	ring finger protein 157	chr17	1.71793	7.31739	8.52e-06
ENSG00000164134	NAA15	N(alpha)-acetyltransferase 15, NatA auxiliary subunit	chr4	0.798426	7.85995	1
ENSG00000163171	CDC42EP3	CDC42 effector protein 3	chr2	0.000624718	6.82638	1
ENSG00000105576	TNPO2	transportin 2	chr19	0.585531	7.6829	1
ENSG00000112592	TBP	TATA-box binding protein	chr6	0.309294	6.93465	1
ENSG00000120688	WBP4	WW domain binding protein 4	chr13	0.480494	7.43063	1
ENSG00000155760	FZD7	frizzled class receptor 7	chr2	-1.17709	7.24337	0.241493
ENSG00000153560	UBP1	upstream binding protein 1 (LBP-1a)	chr3	0.477257	7.62327	1
ENSG00000100442	FKBP3	FK506 binding protein 3	chr14	0.360806	8.34046	1
ENSG00000165323	FAT3	FAT atypical cadherin 3	chr11	-2.52349	6.677	1.77e-14
ENSG00000110013	SIAE	sialic acid acetylesterase	chr11	-0.800332	6.9061	1
ENSG00000139433	GLTP	glycolipid transfer protein	chr12	1.14856	7.56941	0.317404
ENSG00000166598	MIR3652	microRNA 3652	NA	-0.193885	9.86774	1
ENSG00000145882	PCYOX1L	prenylcysteine oxidase 1 like	chr5	1.16986	6.92299	0.297949
ENSG00000076108	BAZ2A	bromodomain adjacent to zinc finger domain 2A	chr12	0.24702	8.49732	1
ENSG00000171016	PYGO1	pygopus family PHD finger 1	chr15	0.177883	7.17114	1
ENSG00000176049	JAKMIP2	janus kinase and microtubule interacting protein 2	chr5	0.00391541	7.69506	1
ENSG00000139437	TCHP	trichoplein keratin filament binding	chr12	0.936126	7.03197	1
ENSG00000156515	HK1	hexokinase 1	chr10	0.947581	7.93413	1
ENSG00000171488	LRRC8C	leucine rich repeat containing 8 family member C	chr1	1.19463	6.68987	0.207653
ENSG00000179981	TSHZ1	teashirt zinc finger homeobox 1	chr18	0.250188	7.03329	1
ENSG00000169136	MIR4751	microRNA 4751	NA	-1.63934	6.9729	0.000826126
ENSG00000147576	ADHFE1	alcohol dehydrogenase, iron containing 1	chr8	-0.0178238	6.71063	1
ENSG00000140743	LOC101060399	cerebellar degeneration-related protein 2	NA	0.311024	6.93034	1
ENSG00000181192	DHTKD1	dehydrogenase E1 and transketolase domain containing 1	chr10	-0.0294036	7.90042	1
ENSG00000174243	DDX23	DEAD-box helicase 23	chr12	0.413224	7.48036	1
ENSG00000184194	GPR173	G protein-coupled receptor 173	chrX	0.714527	6.98332	1
ENSG00000255248	MIR100HG	mir-100-let-7a-2 cluster host gene	NA	-1.00054	6.97453	1
ENSG00000240024	LINC00888	long intergenic non-protein coding RNA 888	NA	0.678848	6.99492	1
ENSG00000205730	ITPRIPL2	inositol 1,4,5-trisphosphate receptor interacting protein like 2	chr16	1.21838	7.00729	0.188374
ENSG00000124299	PEPD	peptidase D	chr19	-0.365455	7.26046	1
ENSG00000116161	CACYBP	calcyclin binding protein	chr1	0.925916	7.66376	1
ENSG00000163884	KLF15	Kruppel like factor 15	chr3	-0.192395	6.65445	1
ENSG00000103479	RBL2	RB transcriptional corepressor like 2	chr16	0.344196	7.23884	1
ENSG00000224470	ATXN1L	ataxin 1 like	chr16	0.396927	6.95203	1
ENSG00000103353	UBFD1	ubiquitin family domain containing 1	chr16	0.0450893	7.34077	1
ENSG00000170037	CNTROB	centrobin, centriole duplication and spindle assembly protein	chr17	0.350204	7.13599	1
ENSG00000053371	AKR7A2	aldo-keto reductase family 7 member A2	chr1	0.111204	7.35809	1
ENSG00000084453	SLCO1A2	solute carrier organic anion transporter family member 1A2	chr12	-0.698127	6.9456	1
ENSG00000130517	PGPEP1	pyroglutamyl-peptidase I	chr19	-0.106109	6.84398	1
ENSG00000187134	AKR1C1	aldo-keto reductase family 1 member C1	chr10	-1.96351	6.85302	2.02e-07
ENSG00000147852	VLDLR	very low density lipoprotein receptor	chr9	1.35003	7.2769	0.0298683
ENSG00000140534	TICRR	TOPBP1 interacting checkpoint and replication regulator	chr15	0.887225	6.94055	1
ENSG00000055332	EIF2AK2	eukaryotic translation initiation factor 2 alpha kinase 2	chr2	0.79687	7.81447	1
ENSG00000131069	ACSS2	acyl-CoA synthetase short-chain family member 2	chr20	-0.335136	7.73633	1
ENSG00000108039	XPNPEP1	X-prolyl aminopeptidase 1	chr10	0.765001	8.2224	1
ENSG00000266524	GDF10	growth differentiation factor 10	chr10	-1.88548	6.79674	8.67e-06
ENSG00000213024	NUP62	nucleoporin 62	chr19	0.124633	7.97125	1
ENSG00000196542	SPTSSB	serine palmitoyltransferase small subunit B	chr3	-0.955633	6.70975	1
ENSG00000163904	SENP2	SUMO1/sentrin/SMT3 specific peptidase 2	chr3	-0.0352678	7.29913	1
ENSG00000092470	WDR76	WD repeat domain 76	chr15	1.78146	6.91629	0.000164535
ENSG00000111676	ATN1	atrophin 1	chr12	0.920489	8.87683	1
ENSG00000179152	TCAIM	T-cell activation inhibitor, mitochondrial	chr3	0.657062	7.06463	1
ENSG00000109099	PMP22	peripheral myelin protein 22	chr17	1.31083	7.052	0.0720133
ENSG00000164626	KCNK5	potassium two pore domain channel subfamily K member 5	chr6	2.46657	7.02532	7.23e-13
ENSG00000184949	FAM227A	family with sequence similarity 227 member A	chr22	-1.54122	6.83681	0.00416374
ENSG00000124275	LOC107986404	uncharacterized LOC107986404	NA	0.575599	6.99834	1
ENSG00000172062	SMN1	survival of motor neuron 1, telomeric	chr5	0.564254	7.58884	1
ENSG00000136810	TXN	thioredoxin	chr9	0.168995	7.84174	1
ENSG00000197961	ZNF121	zinc finger protein 121	chr19	0.592971	7.52546	1
ENSG00000103740	ACSBG1	acyl-CoA synthetase bubblegum family member 1	chr15	-1.74001	6.92009	1.78e-05
ENSG00000137968	SLC44A5	solute carrier family 44 member 5	chr1	-1.91691	6.77748	3.81e-06
ENSG00000165259	HDX	highly divergent homeobox	chrX	0.214045	6.77717	1
ENSG00000140948	ZCCHC14	zinc finger CCHC-type containing 14	chr16	0.965845	7.49133	1
ENSG00000116062	MSH6	mutS homolog 6	chr2	0.378758	7.78133	1
ENSG00000124788	ATXN1	ataxin 1	chr6	0.0728581	6.95434	1
ENSG00000072274	TFRC	transferrin receptor	chr3	-0.494045	7.51375	1
ENSG00000149591	TAGLN	transgelin	chr11	-1.69949	6.7245	0.00166932
ENSG00000143067	ZNF697	zinc finger protein 697	chr1	0.751392	7.058	1
ENSG00000173698	ADGRG2	adhesion G protein-coupled receptor G2	chrX	1.13241	6.69416	0.288607
ENSG00000188158	NHS	NHS actin remodeling regulator	chrX	-0.741933	6.67068	1
ENSG00000067167	TRAM1	translocation associated membrane protein 1	chr8	-0.162542	7.73267	1
ENSG00000189369	GSPT2	G1 to S phase transition 2	chrX	0.0471087	7.04352	1
ENSG00000185112	FAM43A	family with sequence similarity 43 member A	chr3	-3.04769	6.70214	1.99e-30
ENSG00000137770	CTDSPL2	CTD small phosphatase like 2	chr15	0.242506	7.48008	1
ENSG00000130449	ZSWIM6	zinc finger SWIM-type containing 6	chr5	0.0985971	7.41443	1
ENSG00000148444	COMMD3	COMM domain containing 3	chr10	-0.0955073	6.92927	1
ENSG00000127418	FGFRL1	fibroblast growth factor receptor-like 1	chr4	1.62482	6.82355	0.0029103
ENSG00000179091	CYC1	cytochrome c1	chr8	0.183369	7.71346	1
ENSG00000157625	TAB3	TGF-beta activated kinase 1 and MAP3K7 binding protein 3	chrX	0.39996	6.99819	1
ENSG00000166123	GPT2	glutamic--pyruvic transaminase 2	chr16	0.270534	7.0571	1
ENSG00000179604	CDC42EP4	CDC42 effector protein 4	chr17	-1.80318	6.79777	2.98e-05
ENSG00000126947	ARMCX1	armadillo repeat containing, X-linked 1	chrX	-0.629377	7.1197	1
ENSG00000119523	ALG2	ALG2, alpha-1,3/1,6-mannosyltransferase	chr9	-0.278258	6.92339	1
ENSG00000197872	FAM49A	family with sequence similarity 49 member A	chr2	0.303836	6.78485	1
ENSG00000134243	SORT1	sortilin 1	chr1	0.0408731	7.43786	1
ENSG00000148229	POLE3	DNA polymerase epsilon 3, accessory subunit	chr9	0.657711	7.46718	1
ENSG00000136631	VPS45	vacuolar protein sorting 45 homolog	chr1	-0.0397116	7.41816	1
ENSG00000113108	MIR6831	microRNA 6831	NA	0.0595401	7.00062	1
ENSG00000183718	TRIM52	tripartite motif containing 52	chr5	0.0213985	6.86275	1
ENSG00000111596	CNOT2	CCR4-NOT transcription complex subunit 2	chr12	-0.114089	8.03979	1
ENSG00000147164	SNX12	sorting nexin 12	chrX	-0.0314636	7.49862	1
ENSG00000173418	NAA20	N(alpha)-acetyltransferase 20, NatB catalytic subunit	chr20	0.686672	7.17226	1
ENSG00000139117	CPNE8	copine 8	chr12	0.332529	7.16642	1
ENSG00000105011	ASF1B	anti-silencing function 1B histone chaperone	chr19	0.803324	7.11138	1
ENSG00000138629	UBL7	ubiquitin like 7	chr15	1.13883	7.23815	0.378236
ENSG00000184384	MAML2	mastermind like transcriptional coactivator 2	chr11	0.914352	6.97206	1
ENSG00000079387	SENP1	SUMO1/sentrin specific peptidase 1	chr12	0.303447	7.07157	1
ENSG00000149177	PTPRJ	protein tyrosine phosphatase, receptor type J	chr11	1.96101	7.09846	5.04e-07
ENSG00000070018	LRP6	LDL receptor related protein 6	chr12	-0.559785	7.797	1
ENSG00000204569	PPP1R10	protein phosphatase 1 regulatory subunit 10	chr6_dbb_hap3	-0.132937	7.6105	1
ENSG00000103034	NDRG4	NDRG family member 4	chr16	0.890034	6.96362	1
ENSG00000108984	MAP2K6	mitogen-activated protein kinase kinase 6	chr17	0.216487	6.97831	1
ENSG00000149554	CHEK1	checkpoint kinase 1	chr11	0.523928	7.20947	1
ENSG00000172458	IL17D	interleukin 17D	chr13	2.19817	6.71553	9.62e-08
ENSG00000100242	SUN2	Sad1 and UNC84 domain containing 2	chr22	-0.644242	7.02235	1
ENSG00000160783	PMF1	polyamine modulated factor 1	chr1	0.579439	7.34321	1
ENSG00000198521	ZNF43	zinc finger protein 43	chr19	0.118321	7.50483	1
ENSG00000169499	PLEKHA2	pleckstrin homology domain containing A2	chr8	0.921851	6.72038	1
ENSG00000198015	MRPL42	mitochondrial ribosomal protein L42	chr12	0.448896	8.06164	1
ENSG00000128944	KNSTRN	kinetochore localized astrin/SPAG5 binding protein	chr15	0.536668	7.00398	1
ENSG00000111641	NOP2	NOP2 nucleolar protein	chr12	0.709035	7.17976	1
ENSG00000092531	SNAP23	synaptosome associated protein 23	chr15	0.0200334	7.14812	1
ENSG00000103995	CEP152	centrosomal protein 152	chr15	0.794243	7.2596	1
ENSG00000175879	HOXD8	homeobox D8	chr2	-2.20108	6.84367	1.63e-11
ENSG00000144824	PHLDB2	pleckstrin homology like domain family B member 2	chr3	0.302231	7.14052	1
ENSG00000198157	HMGN5	high mobility group nucleosome binding domain 5	chrX	0.236545	6.97721	1
ENSG00000233101	HOXB-AS3	HOXB cluster antisense RNA 3	chr17	-2.64257	6.71548	9.01e-18
ENSG00000103197	TSC2	tuberous sclerosis 2	chr16	0.0197506	7.56099	1
ENSG00000046651	OFD1	OFD1, centriole and centriolar satellite protein	chrX	0.620027	7.33828	1
ENSG00000259976	MIR568	microRNA 568	NA	0.851506	6.86887	1
ENSG00000105497	ZNF175	zinc finger protein 175	chr19	0.737738	6.77931	1
ENSG00000063180	CA11	carbonic anhydrase 11	chr19	-1.43325	6.89794	0.0170343
ENSG00000136451	VEZF1	vascular endothelial zinc finger 1	chr17	0.467138	8.5411	1
ENSG00000176597	B3GNT5	UDP-GlcNAc:betaGal beta-1,3-N-acetylglucosaminyltransferase 5	chr3	0.612986	7.0434	1
ENSG00000116604	MEF2D	myocyte enhancer factor 2D	chr1	-0.208815	6.92861	1
ENSG00000148730	EIF4EBP2	eukaryotic translation initiation factor 4E binding protein 2	chr10	0.618457	8.71974	1
ENSG00000134871	COL4A2	collagen type IV alpha 2 chain	chr13	0.309119	8.39194	1
ENSG00000060749	QSER1	glutamine and serine rich 1	chr11	0.301413	7.96677	1
ENSG00000123505	AMD1	adenosylmethionine decarboxylase 1	chr6	0.481094	7.50338	1
ENSG00000184743	ATL3	atlastin GTPase 3	chr11	0.340498	7.12426	1
ENSG00000131437	KIF3A	kinesin family member 3A	chr5	-0.618771	7.38403	1
ENSG00000166845	C18orf54	chromosome 18 open reading frame 54	chr18	0.606714	7.05767	1
ENSG00000172432	GTPBP2	GTP binding protein 2	chr6	1.16512	7.26171	0.284918
ENSG00000009844	VTA1	vesicle trafficking 1	chr6	0.414432	7.6472	1
ENSG00000117616	RSRP1	arginine and serine rich protein 1	chr1	0.197955	7.42753	1
ENSG00000141543	EIF4A3	eukaryotic translation initiation factor 4A3	chr17	0.569484	7.75398	1
ENSG00000085788	DDHD2	DDHD domain containing 2	chr8	-0.042281	7.58411	1
ENSG00000276043	UHRF1	ubiquitin like with PHD and ring finger domains 1	chr19	0.0437986	7.10592	1
ENSG00000131828	PDHA1	pyruvate dehydrogenase (lipoamide) alpha 1	chrX	0.597955	7.63168	1
ENSG00000244694	PTCHD4	patched domain containing 4	chr6	0.248026	6.74742	1
ENSG00000131238	PPT1	palmitoyl-protein thioesterase 1	chr1	-0.266647	7.9672	1
ENSG00000133065	SLC41A1	solute carrier family 41 member 1	chr1	-0.256515	6.92482	1
ENSG00000185269	NOTUM	NOTUM, palmitoleoyl-protein carboxylesterase	chr17	0.951101	6.70246	0.79818
ENSG00000125817	CENPB	centromere protein B	chr20	0.891209	7.32642	1
ENSG00000140941	MAP1LC3B	microtubule associated protein 1 light chain 3 beta	chr16	0.0714677	7.76895	1
ENSG00000135315	CEP162	centrosomal protein 162	chr6	0.0496537	7.28957	1
ENSG00000172775	FAM192A	family with sequence similarity 192 member A	chr16	0.381391	7.56641	1
ENSG00000119242	CCDC92	coiled-coil domain containing 92	chr12	0.0421325	7.37897	1
ENSG00000104064	GABPB1	GA binding protein transcription factor beta subunit 1	chr15	0.535584	7.33877	1
ENSG00000052723	SIKE1	suppressor of IKBKE 1	chr1	0.174952	7.44236	1
ENSG00000101407	TTI1	TELO2 interacting protein 1	chr20	0.325596	7.2652	1
ENSG00000120158	RCL1	RNA terminal phosphate cyclase like 1	chr9	0.409447	6.73204	1
ENSG00000198797	BRINP2	BMP/retinoic acid inducible neural specific 2	chr1	-2.92104	6.63033	5.48e-26
ENSG00000173548	SNX33	sorting nexin 33	chr15	0.817151	6.90113	1
ENSG00000198075	SULT1C4	sulfotransferase family 1C member 4	chr2	0.354175	6.88039	1
ENSG00000102290	PCDH11X	protocadherin 11 X-linked	chrX	1.50843	6.71836	0.0114811
ENSG00000167977	KCTD5	potassium channel tetramerization domain containing 5	chr16	0.184252	6.9126	1
ENSG00000162517	PEF1	penta-EF-hand domain containing 1	chr1	0.419822	7.07597	1
ENSG00000134532	SOX5	SRY-box 5	chr12	0.207768	7.87047	1
ENSG00000114796	KLHL24	kelch like family member 24	chr3	0.615151	7.14531	1
ENSG00000153956	CACNA2D1	calcium voltage-gated channel auxiliary subunit alpha2delta 1	chr7	-1.19662	7.22113	0.170628
ENSG00000078804	TP53INP2	tumor protein p53 inducible nuclear protein 2	chr20	-1.03141	6.76815	0.710301
ENSG00000131149	GSE1	Gse1 coiled-coil protein	chr16	0.129954	7.03857	1
ENSG00000126107	HECTD3	HECT domain E3 ubiquitin protein ligase 3	chr1	-0.208244	7.10068	1
ENSG00000134086	VHL	von Hippel-Lindau tumor suppressor	chr3	0.328544	7.38047	1
ENSG00000157933	SKI	SKI proto-oncogene	chr1	0.324826	7.65172	1
ENSG00000121579	NAA50	N(alpha)-acetyltransferase 50, NatE catalytic subunit	chr3	0.448647	7.75303	1
ENSG00000113621	TXNDC15	thioredoxin domain containing 15	chr5	-0.427153	7.08336	1
ENSG00000170390	DCLK2	doublecortin like kinase 2	chr4	0.173353	7.25139	1
ENSG00000140575	IQGAP1	IQ motif containing GTPase activating protein 1	chr15	0.0100793	8.30855	1
ENSG00000223501	VPS52	VPS52, GARP complex subunit	chr6_dbb_hap3	0.0408963	7.22332	1
ENSG00000174501	ANKRD36C	ankyrin repeat domain 36C	NA	0.0156317	8.60156	1
ENSG00000174456	C12orf76	chromosome 12 open reading frame 76	chr12	-0.104228	6.98525	1
ENSG00000256294	ZNF225	zinc finger protein 225	chr19	0.514455	6.71302	1
ENSG00000144744	UBA3	ubiquitin like modifier activating enzyme 3	chr3	0.360851	7.90472	1
ENSG00000035862	TIMP2	TIMP metallopeptidase inhibitor 2	chr17	0.20687	7.92683	1
ENSG00000186665	C17orf58	chromosome 17 open reading frame 58	chr17	0.569422	7.05306	1
ENSG00000014914	MTMR11	myotubularin related protein 11	chr1	-1.52833	6.70542	0.00987664
ENSG00000129055	ANAPC13	anaphase promoting complex subunit 13	chr3	-0.000465256	7.46033	1
ENSG00000152076	CCDC74B	coiled-coil domain containing 74B	chr2	-0.639205	7.01523	1
ENSG00000198792	TMEM184B	transmembrane protein 184B	chr22	0.546179	7.46983	1
ENSG00000128242	GAL3ST1	galactose-3-O-sulfotransferase 1	chr22	2.46232	6.92119	2.21e-11
ENSG00000203667	COX20	COX20, cytochrome c oxidase assembly factor	chr1	0.540921	7.2855	1
ENSG00000155111	CDK19	cyclin dependent kinase 19	chr6	0.295524	7.25783	1
ENSG00000182968	SOX1	SRY-box 1	chr13	-2.92572	6.65895	8.32e-26
ENSG00000104447	TRPS1	transcriptional repressor GATA binding 1	chr8	-0.535179	7.20282	1
ENSG00000005238	FAM214B	family with sequence similarity 214 member B	chr9	-0.0555766	6.82403	1
ENSG00000225783	MIAT	myocardial infarction associated transcript (non-protein coding)	NA	-2.68248	6.63449	1.17e-18
ENSG00000151746	BICD1	BICD cargo adaptor 1	chr12	1.13049	7.37973	0.40598
ENSG00000095002	MSH2	mutS homolog 2	chr2	-0.198512	7.43993	1
ENSG00000162576	MXRA8	matrix remodeling associated 8	chr1	-2.03936	6.67095	1.86e-07
ENSG00000198382	UVRAG	UV radiation resistance associated	chr11	-0.2927	7.25006	1
ENSG00000091879	ANGPT2	angiopoietin 2	chr8	-0.960809	6.7549	1
ENSG00000113296	THBS4	thrombospondin 4	chr5	-0.593698	6.70174	1
ENSG00000116198	CEP104	centrosomal protein 104	chr1	-0.351048	7.09554	1
ENSG00000185129	PURA	purine rich element binding protein A	chr5	0.314615	7.45321	1
ENSG00000117602	RCAN3	RCAN family member 3	chr1	0.45117	6.68844	1
ENSG00000150457	LATS2	large tumor suppressor kinase 2	chr13	0.0674211	7.30318	1
ENSG00000135316	SYNCRIP	synaptotagmin binding cytoplasmic RNA interacting protein	chr6	0.389839	8.52909	1
ENSG00000186409	CCDC30	coiled-coil domain containing 30	chr1	-0.622861	6.67879	1
ENSG00000196204	RNF216P1	ring finger protein 216 pseudogene 1	NA	0.392093	7.0358	1
ENSG00000224420	ADM5	adrenomedullin 5 (putative)	chr19	0.547348	6.66234	1
ENSG00000240694	PNMA2	paraneoplastic Ma antigen 2	chr8	-2.48523	6.68378	2.18e-14
ENSG00000067113	PLPP1	phospholipid phosphatase 1	chr5	1.778	7.29077	3.47e-06
ENSG00000110917	MLEC	malectin	chr12	0.981852	7.93136	1
ENSG00000147669	POLR2K	RNA polymerase II subunit K	chr8	0.402297	7.26364	1
ENSG00000164970	FAM219A	family with sequence similarity 219 member A	chr9	0.633839	6.7884	1
ENSG00000135046	ANXA1	annexin A1	chr9	-2.45567	6.68017	1.94e-13
ENSG00000198730	CTR9	CTR9 homolog, Paf1/RNA polymerase II complex component	chr11	-0.187075	7.91894	1
ENSG00000121068	TBX2	T-box 2	chr17	2.25019	6.65556	3.97e-10
ENSG00000131023	LATS1	large tumor suppressor kinase 1	chr6	-0.114789	7.46803	1
ENSG00000008083	JARID2	jumonji and AT-rich interaction domain containing 2	chr6	-0.0358996	7.46886	1
ENSG00000137478	FCHSD2	FCH and double SH3 domains 2	chr11	-0.214871	6.96684	1
ENSG00000102053	ZC3H12B	zinc finger CCCH-type containing 12B	chrX	-1.81575	6.71654	4e-05
ENSG00000198440	ZNF583	zinc finger protein 583	chr19	-0.108996	6.73705	1
ENSG00000197619	ZNF615	zinc finger protein 615	chr19	0.393176	6.74564	1
ENSG00000260942	CAPN10-AS1	CAPN10 antisense RNA 1 (head to head)	NA	0.669052	6.65083	1
ENSG00000162849	KIF26B	kinesin family member 26B	chr1	-1.02212	6.73909	0.788886
ENSG00000105197	TIMM50	translocase of inner mitochondrial membrane 50	chr19	0.738571	7.15793	1
ENSG00000129682	FGF13	fibroblast growth factor 13	chrX	-0.400049	6.81096	1
ENSG00000118707	TGIF2	TGFB induced factor homeobox 2	chr20	0.470861	7.31556	1
ENSG00000185480	PARPBP	PARP1 binding protein	chr12	0.538783	6.92471	1
ENSG00000185070	FLRT2	fibronectin leucine rich transmembrane protein 2	chr14	-2.52142	6.75391	9.1e-16
ENSG00000110931	CAMKK2	calcium/calmodulin dependent protein kinase kinase 2	chr12	0.0104611	7.29251	1
ENSG00000100445	SDR39U1	short chain dehydrogenase/reductase family 39U member 1	chr14	0.01968	7.3501	1
ENSG00000168393	DTYMK	deoxythymidylate kinase	chr2	0.387914	7.32449	1
ENSG00000112159	MDN1	midasin AAA ATPase 1	chr6	0.223789	7.64191	1
ENSG00000168769	TET2	tet methylcytosine dioxygenase 2	chr4	0.415794	7.43779	1
ENSG00000228474	OST4	oligosaccharyltransferase complex subunit 4, non-catalytic	chr2	0.60084	7.46257	1
ENSG00000178878	APOLD1	apolipoprotein L domain containing 1	chr12	-1.16568	6.73368	0.32256
ENSG00000130382	MLLT1	MLLT1, super elongation complex subunit	chr19	-0.445514	7.55192	1
ENSG00000174032	SLC25A30	solute carrier family 25 member 30	chr13	0.540773	6.87891	1
ENSG00000116711	PLA2G4A	phospholipase A2 group IVA	chr1	1.24576	6.93874	0.140203
ENSG00000140564	FURIN	furin, paired basic amino acid cleaving enzyme	chr15	1.56842	6.78639	0.00558597
ENSG00000011201	ANOS1	anosmin 1	chrX	1.94485	6.71673	1.64e-05
ENSG00000084463	WBP11	WW domain binding protein 11	chr12	0.358389	7.81491	1
ENSG00000172717	FAM71D	family with sequence similarity 71 member D	chr14	1.16979	7.68206	0.199526
ENSG00000129038	LOXL1	lysyl oxidase like 1	chr15	-0.449508	6.76055	1
ENSG00000264522	OTUD7B	OTU deubiquitinase 7B	chr1	0.287192	7.08265	1
ENSG00000134480	CCNH	cyclin H	chr5	0.240843	7.00843	1
ENSG00000100580	TMED8	transmembrane p24 trafficking protein family member 8	chr14	0.842833	7.18884	1
ENSG00000163945	UVSSA	UV stimulated scaffold protein A	chr4	-0.185557	6.93663	1
ENSG00000081386	ZNF510	zinc finger protein 510	chr9	-0.323792	6.87111	1
ENSG00000118482	PHF3	PHD finger protein 3	chr6	-0.258371	7.66658	1
ENSG00000167196	FBXO22	F-box protein 22	chr15	0.741284	7.68325	1
ENSG00000164687	FABP5	fatty acid binding protein 5	chr8	1.04656	7.16331	0.77832
ENSG00000104343	UBE2W	ubiquitin conjugating enzyme E2 W	chr8	-0.130405	7.10457	1
ENSG00000163956	LRPAP1	LDL receptor related protein associated protein 1	chr4	-0.583591	7.57399	1
ENSG00000077684	JADE1	jade family PHD finger 1	chr4	0.0247655	7.07732	1
ENSG00000029363	BCLAF1	BCL2 associated transcription factor 1	chr6	0.0542553	8.69808	1
ENSG00000248487	ABHD14A	abhydrolase domain containing 14A	chr3	0.463378	6.68761	1
ENSG00000242808	SOX2-OT	SOX2 overlapping transcript	NA	1.94976	7.20566	6.23e-08
ENSG00000183722	LHFP	lipoma HMGIC fusion partner	chr13	-0.663837	6.85515	1
ENSG00000166669	ATF7IP2	activating transcription factor 7 interacting protein 2	chr16	0.902861	7.09522	1
ENSG00000091542	ALKBH5	alkB homolog 5, RNA demethylase	chr17	0.372781	7.5832	1
ENSG00000100167	2003-09-01	septin 3	chr22	0.017283	6.92171	1
ENSG00000108352	RAPGEFL1	Rap guanine nucleotide exchange factor like 1	chr17	0.571111	6.8352	1
ENSG00000114021	NIT2	nitrilase family member 2	chr3	1.42103	7.05561	0.0165093
ENSG00000079459	FDFT1	farnesyl-diphosphate farnesyltransferase 1	chr8	-0.303532	9.63445	1
ENSG00000121931	LRIF1	ligand dependent nuclear receptor interacting factor 1	chr1	-0.559662	6.93936	1
ENSG00000068354	TBC1D25	TBC1 domain family member 25	chrX	0.796478	6.7529	1
ENSG00000167085	PHB	prohibitin	chr17	0.602508	7.80526	1
ENSG00000049130	KITLG	KIT ligand	chr12	-1.01712	6.7603	0.842529
ENSG00000166896	ATP23	ATP23 metallopeptidase and ATP synthase assembly factor homolog	chr12	0.345667	6.73268	1
ENSG00000184277	TM2D3	TM2 domain containing 3	chr15	0.828227	7.01457	1
ENSG00000101928	MOSPD1	motile sperm domain containing 1	chrX	-0.29381	6.80031	1
ENSG00000030582	GRN	granulin precursor	chr17	-0.161425	8.16067	1
ENSG00000136874	STX17	syntaxin 17	chr9	0.50103	7.0078	1
ENSG00000122483	CCDC18	coiled-coil domain containing 18	chr1	0.348697	7.12259	1
ENSG00000124613	ZNF391	zinc finger protein 391	chr6	-0.385327	6.84031	1
ENSG00000116830	TTF2	transcription termination factor 2	chr1	0.844144	7.35734	1
ENSG00000156398	SFXN2	sideroflexin 2	chr10	-0.672871	6.8976	1
ENSG00000187164	SHTN1	shootin 1	chr10	1.63272	7.01806	0.000749542
ENSG00000120889	TNFRSF10B	TNF receptor superfamily member 10b	chr8	-0.085946	8.1434	1
ENSG00000108960	MMD	monocyte to macrophage differentiation associated	chr17	0.475482	7.17413	1
ENSG00000168843	FSTL5	follistatin like 5	chr4	2.92826	6.85933	3.96e-17
ENSG00000135913	USP37	ubiquitin specific peptidase 37	chr2	0.693435	7.19044	1
ENSG00000112773	FAM46A	family with sequence similarity 46 member A	chr6	-0.417535	7.04888	1
ENSG00000152464	RPP38	ribonuclease P/MRP subunit p38	chr10	0.197282	6.95662	1
ENSG00000106460	TMEM106B	transmembrane protein 106B	chr7	0.215804	7.78917	1
ENSG00000102409	BEX4	brain expressed X-linked 4	chrX	0.0166475	7.55235	1
ENSG00000141753	IGFBP4	insulin like growth factor binding protein 4	chr17	0.845491	7.42301	1
ENSG00000105255	FSD1	fibronectin type III and SPRY domain containing 1	chr19	0.413067	7.1003	1
ENSG00000198464	ZNF480	zinc finger protein 480	chr19	0.529098	7.30997	1
ENSG00000126217	MCF2L	MCF.2 cell line derived transforming sequence like	chr13	0.276515	7.27577	1
ENSG00000189050	RNFT1	ring finger protein, transmembrane 1	chr17	-0.328004	6.8538	1
ENSG00000196507	TCEAL3	transcription elongation factor A like 3	chrX	0.231188	6.88554	1
ENSG00000182168	UNC5C	unc-5 netrin receptor C	chr4	-1.54603	7.05235	0.000590265
ENSG00000187866	FAM122A	family with sequence similarity 122A	chr9	0.33235	6.83577	1
ENSG00000175928	LRRN1	leucine rich repeat neuronal 1	chr3	-2.27408	6.73499	4.56e-11
ENSG00000174021	GNG5	G protein subunit gamma 5	chr1	0.426383	7.94455	1
ENSG00000077458	FAM76B	family with sequence similarity 76 member B	chr11	0.0809437	7.15255	1
ENSG00000115232	ITGA4	integrin subunit alpha 4	chr2	2.2246	7.3078	6.46e-13
ENSG00000184898	RBM43	RNA binding motif protein 43	chr2	-0.177571	6.71006	1
ENSG00000048828	FAM120A	family with sequence similarity 120A	chr9	0.343009	7.74601	1
ENSG00000163626	COX18	COX18, cytochrome c oxidase assembly factor	chr4	0.589554	6.97625	1
ENSG00000185634	SHC4	SHC adaptor protein 4	chr15	2.13393	6.89939	1.23e-07
ENSG00000171475	WIPF2	WAS/WASL interacting protein family member 2	chr17	-0.268218	7.80126	1
ENSG00000050748	MAPK9	mitogen-activated protein kinase 9	chr5	0.105622	7.20145	1
ENSG00000117868	ESYT2	extended synaptotagmin 2	chr7	-0.184151	7.24756	1
ENSG00000198162	MAN1A2	mannosidase alpha class 1A member 2	chr1	-0.0739438	8.16084	1
ENSG00000106415	GLCCI1	glucocorticoid induced 1	chr7	0.342258	7.25122	1
ENSG00000055147	FAM114A2	family with sequence similarity 114 member A2	chr5	-0.0727556	6.98288	1
ENSG00000145721	LIX1	limb and CNS expressed 1	chr5	-1.05564	6.72362	0.567211
ENSG00000135269	TES	testin LIM domain protein	chr7	0.00627173	6.88223	1
ENSG00000198945	L3MBTL3	l(3)mbt-like 3 (Drosophila)	chr6	0.961334	6.85296	0.984407
ENSG00000159363	ATP13A2	ATPase 13A2	chr1	-0.00316029	7.20331	1
ENSG00000189057	FAM111B	family with sequence similarity 111 member B	chr11	1.24547	6.81542	0.156262
ENSG00000173611	SCAI	suppressor of cancer cell invasion	chr9	-0.133278	7.15835	1
ENSG00000162437	RAVER2	ribonucleoprotein, PTB binding 2	chr1	0.184666	7.17288	1
ENSG00000178950	GAK	cyclin G associated kinase	chr4	0.268381	7.5612	1
ENSG00000139668	WDFY2	WD repeat and FYVE domain containing 2	chr13	0.0566616	7.41509	1
ENSG00000054277	OPN3	opsin 3	chr1	0.958151	7.24538	1
ENSG00000006025	OSBPL7	oxysterol binding protein like 7	chr17	-0.0817186	6.81604	1
ENSG00000105202	FBL	fibrillarin	chr19	0.857193	8.16592	1
ENSG00000183161	FANCF	Fanconi anemia complementation group F	chr11	-0.39821	6.94669	1
ENSG00000154832	CXXC1	CXXC finger protein 1	chr18	0.571048	7.10709	1
ENSG00000125351	UPF3B	UPF3 regulator of nonsense transcripts homolog B (yeast)	chrX	0.355733	7.47023	1
ENSG00000101198	NKAIN4	sodium/potassium transporting ATPase interacting 4	chr20	0.188025	6.98831	1
ENSG00000145362	ANK2	ankyrin 2	chr4	0.502168	7.74983	1
ENSG00000175183	CSRP2	cysteine and glycine rich protein 2	chr12	-2.90828	6.75995	1.01e-27
ENSG00000118246	FASTKD2	FAST kinase domains 2	chr2	-0.108264	7.00757	1
ENSG00000184402	SS18L1	SS18L1, nBAF chromatin remodeling complex subunit	chr20	0.22316	7.19734	1
ENSG00000118689	FOXO3	forkhead box O3	chr6	1.08029	8.30599	0.492137
ENSG00000134013	LOXL2	lysyl oxidase like 2	chr8	-1.10267	6.93531	0.509819
ENSG00000112312	GMNN	geminin, DNA replication inhibitor	chr6	0.469313	7.14271	1
ENSG00000127481	UBR4	ubiquitin protein ligase E3 component n-recognin 4	chr1	-0.0429473	7.78728	1
ENSG00000161544	CYGB	cytoglobin	chr17	0.262674	6.64046	1
ENSG00000162374	ELAVL4	ELAV like RNA binding protein 4	chr1	1.99135	6.65694	2.51e-06
ENSG00000138035	PNPT1	polyribonucleotide nucleotidyltransferase 1	chr2	0.466362	7.44508	1
ENSG00000169375	SIN3A	SIN3 transcription regulator family member A	chr15	0.23662	7.51849	1
ENSG00000177485	ZBTB33	zinc finger and BTB domain containing 33	chrX	0.441974	7.23397	1
ENSG00000166188	ZNF319	zinc finger protein 319	chr16	-0.284652	6.66909	1
ENSG00000162616	DNAJB4	DnaJ heat shock protein family (Hsp40) member B4	chr1	0.0978228	6.97395	1
ENSG00000070814	TCOF1	treacle ribosome biogenesis factor 1	chr5	0.713301	7.91031	1
ENSG00000123191	ATP7B	ATPase copper transporting beta	chr13	0.659627	6.72823	1
ENSG00000138119	MYOF	myoferlin	chr10	-2.40877	6.73748	1.98e-14
ENSG00000165209	STRBP	spermatid perinuclear RNA binding protein	chr9	0.14948	7.6945	1
ENSG00000135185	TMEM243	transmembrane protein 243	chr7	1.42471	6.92199	0.0186219
ENSG00000196632	WNK3	WNK lysine deficient protein kinase 3	chrX	0.176564	7.15241	1
ENSG00000228288	PCAT6	prostate cancer associated transcript 6 (non-protein coding)	NA	1.56425	6.74108	0.00498088
ENSG00000013573	DDX11	DEAD/H-box helicase 11	chr12	0.704645	7.09149	1
ENSG00000138430	OLA1	Obg like ATPase 1	chr2	0.777666	8.90847	1
ENSG00000100592	DAAM1	dishevelled associated activator of morphogenesis 1	chr14	-1.22195	7.31888	0.105467
ENSG00000131459	GFPT2	glutamine-fructose-6-phosphate transaminase 2	chr5	-0.514709	7.03064	1
ENSG00000188706	ZDHHC9	zinc finger DHHC-type containing 9	chrX	-0.0387819	7.30565	1
ENSG00000096433	ITPR3	inositol 1,4,5-trisphosphate receptor type 3	chr6	2.14795	7.20254	1.95e-10
ENSG00000130669	PAK4	p21 (RAC1) activated kinase 4	chr19	0.154034	7.28412	1
ENSG00000127914	AKAP9	A-kinase anchoring protein 9	chr7	-0.0951072	8.83407	1
ENSG00000155438	NIFK	nucleolar protein interacting with the FHA domain of MKI67	chr2	0.755596	7.52559	1
ENSG00000103342	GSPT1	G1 to S phase transition 1	chr16	0.363889	8.10344	1
ENSG00000143337	TOR1AIP1	torsin 1A interacting protein 1	chr1	-0.338014	7.15935	1
ENSG00000221926	TRIM16	tripartite motif containing 16	chr17	0.408772	7.09902	1
ENSG00000154059	IMPACT	impact RWD domain protein	chr18	0.26367	7.03721	1
ENSG00000276550	HERC2P2	hect domain and RLD 2 pseudogene 2	chr15	-0.648182	8.74836	1
ENSG00000151617	EDNRA	endothelin receptor type A	chr4	-1.52388	6.75853	0.00695622
ENSG00000146676	MIR4657	microRNA 4657	NA	0.320505	7.65523	1
ENSG00000165983	PTER	phosphotriesterase related	chr10	0.632052	6.80989	1
ENSG00000135905	DOCK10	dedicator of cytokinesis 10	chr2	1.73489	6.98911	0.000139128
ENSG00000085982	USP40	ubiquitin specific peptidase 40	chr2	0.206979	7.27233	1
ENSG00000173456	RNF26	ring finger protein 26	chr11	-0.0762586	7.12932	1
ENSG00000110318	CEP126	centrosomal protein 126	chr11	0.052694	6.85752	1
ENSG00000162174	ASRGL1	asparaginase like 1	chr11	0.789779	6.93016	1
ENSG00000167123	CERCAM	cerebral endothelial cell adhesion molecule	chr9	-0.0237627	7.16181	1
ENSG00000163527	STT3B	STT3B, catalytic subunit of the oligosaccharyltransferase complex	chr3	-0.922082	8.53288	1
ENSG00000164163	ABCE1	ATP binding cassette subfamily E member 1	chr4	0.272342	7.8093	1
ENSG00000188895	MSL1	male specific lethal 1 homolog	chr17	0.329291	8.35228	1
ENSG00000115827	DCAF17	DDB1 and CUL4 associated factor 17	chr2	0.100668	6.81051	1
ENSG00000124782	RREB1	ras responsive element binding protein 1	chr6	-0.456701	7.35976	1
ENSG00000113504	SLC12A7	solute carrier family 12 member 7	chr5	-2.18869	6.7564	1.25e-09
ENSG00000180398	MCFD2	multiple coagulation factor deficiency 2	chr2	0.0543029	7.46909	1
ENSG00000077713	SLC25A43	solute carrier family 25 member 43	chrX	-0.180625	6.75866	1
ENSG00000166908	PIP4K2C	phosphatidylinositol-5-phosphate 4-kinase type 2 gamma	chr12	0.316986	6.82279	1
ENSG00000134769	DTNA	dystrobrevin alpha	chr18	-1.49758	6.90906	0.00323326
ENSG00000177868	SVBP	small vasohibin binding protein	chr1	0.145069	7.16625	1
ENSG00000160298	C21orf58	chromosome 21 open reading frame 58	chr21	0.829608	7.04818	1
ENSG00000124201	ZNFX1	zinc finger NFX1-type containing 1	chr20	0.647325	7.10341	1
ENSG00000149212	SESN3	sestrin 3	chr11	0.329945	8.19708	1
ENSG00000108799	EZH1	enhancer of zeste 1 polycomb repressive complex 2 subunit	chr17	0.432152	7.10857	1
ENSG00000225484	NUTM2B-AS1	NUTM2B antisense RNA 1	NA	0.431157	7.7532	1
ENSG00000117533	VAMP4	vesicle associated membrane protein 4	chr1	0.338574	6.87427	1
ENSG00000164434	FABP7	fatty acid binding protein 7	chr6	0.994419	7.17924	1
ENSG00000168077	SCARA3	scavenger receptor class A member 3	chr8	-0.124457	6.72426	1
ENSG00000197081	IGF2R	insulin like growth factor 2 receptor	chr6	-0.0377268	8.12114	1
ENSG00000153944	MSI2	musashi RNA binding protein 2	chr17	-0.0922473	8.78552	1
ENSG00000089916	GPATCH2L	G-patch domain containing 2 like	chr14	0.322247	7.71216	1
ENSG00000145284	SCD5	stearoyl-CoA desaturase 5	chr4	-0.241454	7.22697	1
ENSG00000142207	URB1	URB1 ribosome biogenesis 1 homolog (S. cerevisiae)	chr21	0.615463	7.14215	1
ENSG00000185658	BRWD1	bromodomain and WD repeat domain containing 1	chr21	0.313333	7.88787	1
ENSG00000134874	DZIP1	DAZ interacting zinc finger protein 1	chr13	-0.144907	7.9927	1
ENSG00000185621	LMLN	leishmanolysin like peptidase	chr3	-0.910551	6.78117	1
ENSG00000020256	ZFP64	ZFP64 zinc finger protein	chr20	-0.406847	7.05511	1
ENSG00000109466	KLHL2	kelch like family member 2	chr4	1.27092	6.78252	0.115377
ENSG00000154493	C10orf90	chromosome 10 open reading frame 90	chr10	0.950136	6.62096	0.603062
ENSG00000036530	CYP46A1	cytochrome P450 family 46 subfamily A member 1	chr14	-2.19607	6.61724	2.93e-09
ENSG00000138792	ENPEP	glutamyl aminopeptidase	chr4	1.11679	6.64454	0.214453
ENSG00000158164	TMSB15A	thymosin beta 15a	chrX	0.287445	7.69598	1
ENSG00000174804	FZD4	frizzled class receptor 4	chr11	0.725805	6.70906	1
ENSG00000123104	ITPR2	inositol 1,4,5-trisphosphate receptor type 2	chr12	0.188568	7.40982	1
ENSG00000102893	PHKB	phosphorylase kinase regulatory subunit beta	chr16	0.400024	7.7994	1
ENSG00000160888	IER2	immediate early response 2	chr19	-0.274633	7.64912	1
ENSG00000198363	ASPH	aspartate beta-hydroxylase	chr8	-0.153972	7.88283	1
ENSG00000088986	DYNLL1	dynein light chain LC8-type 1	chr12	0.129357	8.01983	1
ENSG00000005073	HOXA11	homeobox A11	chr7	-1.64131	6.68128	0.000754015
ENSG00000196636	SDHAF3	succinate dehydrogenase complex assembly factor 3	chr7	0.566048	6.85325	1
ENSG00000185262	UBALD2	UBA like domain containing 2	chr17	0.837031	6.92085	1
ENSG00000081019	RSBN1	round spermatid basic protein 1	chr1	0.802024	7.11391	1
ENSG00000213995	NAXD	NAD(P)HX dehydratase	chr13	0.549896	7.13832	1
ENSG00000167881	SRP68	signal recognition particle 68	chr17	0.312256	7.60862	1
ENSG00000176842	IRX5	iroquois homeobox 5	chr16	-2.67774	6.61526	2.83e-19
ENSG00000175305	CCNE2	cyclin E2	chr8	1.25894	6.71982	0.107617
ENSG00000019485	PRDM11	PR/SET domain 11	chr11	0.437158	6.73092	1
ENSG00000139436	GIT2	GIT ArfGAP 2	chr12	-0.14718	7.47413	1
ENSG00000069329	VPS35	VPS35, retromer complex component	chr16	-0.22858	8.04982	1
ENSG00000165660	FAM175B	family with sequence similarity 175 member B	chr10	-0.0675135	7.05485	1
ENSG00000163166	IWS1	IWS1, SUPT6H interacting protein	chr2	0.320665	7.78091	1
ENSG00000162972	MAIP1	matrix AAA peptidase interacting protein 1	chr2	0.127828	6.90675	1
ENSG00000281881	SPRY4-IT1	SPRY4 intronic transcript 1	NA	0.226911	6.79714	1
ENSG00000185201	IFITM2	interferon induced transmembrane protein 2	chr11	-1.02729	7.05138	0.957868
ENSG00000197381	ADARB1	adenosine deaminase, RNA specific B1	chr21	1.60455	7.09531	0.000693149
ENSG00000014123	UFL1	UFM1 specific ligase 1	chr6	-0.296545	7.33181	1
ENSG00000203727	SAMD5	sterile alpha motif domain containing 5	chr6	1.27881	6.70756	0.0847847
ENSG00000105298	CACTIN	cactin, spliceosome C complex subunit	chr19	1.24981	7.00293	0.135348
ENSG00000205476	CCDC85C	coiled-coil domain containing 85C	chr14	-1.54494	6.83733	0.00265742
ENSG00000139505	MTMR6	myotubularin related protein 6	chr13	0.381555	7.24978	1
ENSG00000173530	TNFRSF10D	TNF receptor superfamily member 10d	chr8	-0.0732375	6.88261	1
ENSG00000165813	MIR2110	microRNA 2110	NA	-0.771416	7.18522	1
ENSG00000150593	MIR4680	microRNA 4680	NA	0.179463	7.28824	1
ENSG00000004866	MIR6132	microRNA 6132	NA	-0.1218	6.75264	1
ENSG00000269190	FBXO17	F-box protein 17	chr19	0.934908	6.90333	1
ENSG00000158292	GPR153	G protein-coupled receptor 153	chr1	1.01722	7.26425	1
ENSG00000162772	ATF3	activating transcription factor 3	chr1	-0.122429	6.8605	1
ENSG00000105270	CLIP3	CAP-Gly domain containing linker protein 3	chr19	0.219932	7.74929	1
ENSG00000112874	NUDT12	nudix hydrolase 12	chr5	0.564528	6.81623	1
ENSG00000066382	MPPED2	metallophosphoesterase domain containing 2	chr11	-2.43358	6.74331	4.9e-15
ENSG00000182957	SPATA13	spermatogenesis associated 13	chr13	1.27165	7.22381	0.0874249
ENSG00000101752	MIB1	mindbomb E3 ubiquitin protein ligase 1	chr18	-0.348488	8.06393	1
ENSG00000028839	TBPL1	TATA-box binding protein like 1	chr6	0.964769	6.9507	1
ENSG00000182389	CACNB4	calcium voltage-gated channel auxiliary subunit beta 4	chr2	0.6492	6.95737	1
ENSG00000165671	NSD1	nuclear receptor binding SET domain protein 1	chr5	0.169321	7.70029	1
ENSG00000167861	HID1	HID1 domain containing	chr17	1.62249	6.66505	0.00122202
ENSG00000123933	MIR4800	microRNA 4800	NA	-0.31707	7.49119	1
ENSG00000147548	NSD3	nuclear receptor binding SET domain protein 3	chr8	0.0995584	8.38034	1
ENSG00000139910	NOVA1	NOVA alternative splicing regulator 1	chr14	-0.200907	7.43001	1
ENSG00000149231	CCDC82	coiled-coil domain containing 82	chr11	0.265776	7.21305	1
ENSG00000149311	ATM	ATM serine/threonine kinase	chr11	0.332121	7.86877	1
ENSG00000204130	RUFY2	RUN and FYVE domain containing 2	chr10	-0.0686225	7.21597	1
ENSG00000069849	ATP1B3	ATPase Na+/K+ transporting subunit beta 3	chr3	-0.639708	8.2637	1
ENSG00000116128	BCL9	B-cell CLL/lymphoma 9	chr1	0.265249	7.7704	1
ENSG00000152778	IFIT5	interferon induced protein with tetratricopeptide repeats 5	chr10	0.370779	6.81258	1
ENSG00000258441	LINC00641	long intergenic non-protein coding RNA 641	NA	0.334172	7.07583	1
ENSG00000140199	SLC12A6	solute carrier family 12 member 6	chr15	0.0371202	6.95397	1
ENSG00000104290	FZD3	frizzled class receptor 3	chr8	0.0172267	8.41646	1
ENSG00000128708	HAT1	histone acetyltransferase 1	chr2	0.8923	7.3455	1
ENSG00000182141	ZNF708	zinc finger protein 708	chr19	-0.228253	7.04302	1
ENSG00000166529	ZSCAN21	zinc finger and SCAN domain containing 21	chr7	0.13663	6.85253	1
ENSG00000182796	TMEM198B	transmembrane protein 198B (pseudogene)	NA	0.471304	6.87646	1
ENSG00000134352	IL6ST	interleukin 6 signal transducer	chr5	0.0951913	7.55528	1
ENSG00000186564	FOXD2	forkhead box D2	chr1	2.89896	6.81493	2.69e-17
ENSG00000171953	ATPAF2	ATP synthase mitochondrial F1 complex assembly factor 2	chr17	0.0321456	6.80896	1
ENSG00000280145	LINC01670	long intergenic non-protein coding RNA 1670	NA	1.03726	7.21775	0.859669
ENSG00000164114	MAP9	microtubule associated protein 9	chr4	-0.489503	7.21322	1
ENSG00000166106	ADAMTS15	ADAM metallopeptidase with thrombospondin type 1 motif 15	chr11	1.55929	6.64551	0.00366331
ENSG00000104763	ASAH1	N-acylsphingosine amidohydrolase 1	chr8	-0.0505456	7.76611	1
ENSG00000136830	FAM129B	family with sequence similarity 129 member B	chr9	1.00029	7.46281	1
ENSG00000138593	SECISBP2L	SECIS binding protein 2 like	chr15	0.568052	7.51145	1
ENSG00000134184	GSTM1	glutathione S-transferase mu 1	chr1	-0.252598	7.69211	1
ENSG00000142065	ZFP14	ZFP14 zinc finger protein	chr19	0.0154969	7.05228	1
ENSG00000130956	HABP4	hyaluronan binding protein 4	chr9	-0.106772	7.28206	1
ENSG00000136710	CCDC115	coiled-coil domain containing 115	chr2	0.202497	6.88667	1
ENSG00000166272	WBP1L	WW domain binding protein 1 like	chr10	-1.41986	7.3273	0.0011638
ENSG00000124786	SLC35B3	solute carrier family 35 member B3	chr6	0.217772	7.00865	1
ENSG00000110801	PSMD9	proteasome 26S subunit, non-ATPase 9	chr12	0.413781	6.65622	1
ENSG00000164331	ANKRA2	ankyrin repeat family A member 2	chr5	-0.175	6.96031	1
ENSG00000133935	C14orf1	chromosome 14 open reading frame 1	chr14	-0.63579	7.72062	1
ENSG00000197894	ADH5	alcohol dehydrogenase 5 (class III), chi polypeptide	chr4	0.839666	8.69015	1
ENSG00000164221	CCDC112	coiled-coil domain containing 112	chr5	0.817738	7.25407	1
ENSG00000131435	PDLIM4	PDZ and LIM domain 4	chr5	0.962895	7.50064	1
ENSG00000074071	MRPS34	mitochondrial ribosomal protein S34	chr16	0.419238	7.23915	1
ENSG00000172575	RASGRP1	RAS guanyl releasing protein 1	chr15	-2.71908	6.70497	7.48e-21
ENSG00000167904	TMEM68	transmembrane protein 68	chr8	1.17473	6.98994	0.265008
ENSG00000129474	AJUBA	ajuba LIM protein	chr14	-1.75426	6.76636	5.78e-05
ENSG00000170265	ZNF282	zinc finger protein 282	chr7	0.290628	7.13541	1
ENSG00000213672	NCKIPSD	NCK interacting protein with SH3 domain	chr3	0.172971	6.84514	1
ENSG00000100099	HPS4	HPS4, biogenesis of lysosomal organelles complex 3 subunit 2	chr22	0.0396115	7.46533	1
ENSG00000136811	ODF2	outer dense fiber of sperm tails 2	chr9	-0.496636	7.32113	1
ENSG00000105866	SP4	Sp4 transcription factor	chr7	0.345639	6.90106	1
ENSG00000100605	ITPK1	inositol-tetrakisphosphate 1-kinase	chr14	1.03097	7.30224	0.925455
ENSG00000100714	MTHFD1	methylenetetrahydrofolate dehydrogenase, cyclohydrolase and formyltetrahydrofolate synthetase 1	chr14	0.614706	7.34433	1
ENSG00000136273	HUS1	HUS1 checkpoint clamp component	chr7	-0.185446	6.86084	1
ENSG00000146409	SLC18B1	solute carrier family 18 member B1	chr6	-0.369951	7.12654	1
ENSG00000113328	CCNG1	cyclin G1	chr5	-0.715571	9.06418	1
ENSG00000274956	UG0898H09	uncharacterized LOC643763	chr8	1.08811	6.75173	0.380581
ENSG00000076356	PLXNA2	plexin A2	chr1	0.0275312	6.71815	1
ENSG00000122863	CHST3	carbohydrate sulfotransferase 3	chr10	1.24285	7.12529	0.129581
ENSG00000139718	SETD1B	SET domain containing 1B	chr12	-0.333502	6.95345	1
ENSG00000180263	FGD6	FYVE, RhoGEF and PH domain containing 6	chr12	-1.30277	7.11683	0.0488278
ENSG00000116977	LGALS8	galectin 8	chr1	0.537563	7.29402	1
ENSG00000163754	GYG1	glycogenin 1	chr3	0.241441	7.10128	1
ENSG00000099204	ABLIM1	actin binding LIM protein 1	chr10	-0.021894	7.47323	1
ENSG00000189043	NDUFA4	NDUFA4, mitochondrial complex associated	chr7	0.158352	8.6775	1
ENSG00000178425	NT5DC1	5'-nucleotidase domain containing 1	chr6	-0.317997	7.078	1
ENSG00000136861	CDK5RAP2	CDK5 regulatory subunit associated protein 2	chr9	0.0822516	7.54269	1
ENSG00000113356	POLR3G	RNA polymerase III subunit G	chr5	1.30112	6.81949	0.0802841
ENSG00000139645	ANKRD52	ankyrin repeat domain 52	chr12	1.11204	7.16449	0.472687
ENSG00000167992	VWCE	von Willebrand factor C and EGF domains	chr11	2.36737	7.0228	1.44e-11
ENSG00000235437	LINC01278	long intergenic non-protein coding RNA 1278	NA	0.010833	7.03178	1
ENSG00000158467	AHCYL2	adenosylhomocysteinase like 2	chr7	0.0704874	7.1585	1
ENSG00000164045	CDC25A	cell division cycle 25A	chr3	0.63908	7.01998	1
ENSG00000121964	GTDC1	glycosyltransferase like domain containing 1	chr2	-0.0870022	7.07528	1
ENSG00000102034	ELF4	E74 like ETS transcription factor 4	chrX	1.3517	6.61942	0.0287047
ENSG00000021355	SERPINB1	serpin family B member 1	chr6	0.710609	6.75137	1
ENSG00000158528	PPP1R9A	protein phosphatase 1 regulatory subunit 9A	chr7	-0.528276	7.17831	1
ENSG00000120694	HSPH1	heat shock protein family H (Hsp110) member 1	chr13	0.367454	7.26518	1
ENSG00000047346	FAM214A	family with sequence similarity 214 member A	chr15	-0.363013	7.20244	1
ENSG00000173193	PARP14	poly(ADP-ribose) polymerase family member 14	chr3	-0.724745	6.73278	1
ENSG00000111885	MAN1A1	mannosidase alpha class 1A member 1	chr6	-1.06295	6.75435	0.609008
ENSG00000125375	ATP5S	ATP synthase, H+ transporting, mitochondrial Fo complex subunit s (factor B)	chr14	0.459528	7.06657	1
ENSG00000002834	LASP1	LIM and SH3 protein 1	chr17	-0.221386	8.40345	1
ENSG00000175727	MLXIP	MLX interacting protein	chr12	0.81368	8.01491	1
ENSG00000140265	ZSCAN29	zinc finger and SCAN domain containing 29	chr15	0.374846	7.05277	1
ENSG00000145337	PYURF	PIGY upstream reading frame	chr4	0.283794	7.62552	1
ENSG00000100219	XBP1	X-box binding protein 1	chr22	0.0972993	7.17119	1
ENSG00000186469	GNG2	G protein subunit gamma 2	chr14	1.35252	7.67293	0.00550846
ENSG00000139190	VAMP1	vesicle associated membrane protein 1	chr12	0.099638	6.72597	1
ENSG00000160781	PAQR6	progestin and adipoQ receptor family member 6	chr1	1.26229	6.86737	0.110866
ENSG00000153976	HS3ST3B1	heparan sulfate-glucosamine 3-sulfotransferase 3B1	chr17	1.67214	6.79967	0.00101752
[truncated: 9,323 more rows]
