# Supplementary material for: CD146-assisted isolation and multi-omics characterisation of human pluripotent stem cell derived cranial Schwann cell precursor-like cells.
Source: Research Square preprint supplement (doi:10.21203/rs.3.rs-3324198/v1), 2023-09-19
Supplement: Supplementary file 13 [file e8bd06531defb40411b62289.xlsx]

## Sheet: Diff. Exp. Proteins
Differentially Expressed Proteins
#	Gene name	Neg1	Neg2	Neg3	Neg4	Pos1	Pos2	Pos3	Pos4	minusLOG10.Pvalue	FDR	logFC (Pos/Neg)	Significant
85	KANK4	21.1062	20.0987	20.1233	21.4604	26.1784	26.7153	26.7834	26.5893	5.38839	0	5.86948	REGULATED and logFC > 2.0
37	S100B	20.6667	20.9546	23.3574	20.1486	26.8919	26.9573	26.9223	27.1429	3.6854	0	5.69674	REGULATED and logFC > 2.0
90	MOXD1	20.9456	21.5372	20.353	20.2826	26.5973	26.4133	26.3748	26.1594	5.76461	0	5.60663	REGULATED and logFC > 2.0
60	MCAM	21.3253	20.1859	20.2649	20.2075	25.7186	26.1787	26.1365	26.1205	5.81549	0	5.54264	REGULATED and logFC > 2.0
51	ITGA6	22.3467	21.1263	20.6455	20.6098	25.9185	26.485	26.3079	26.47	4.68962	0	5.11324	REGULATED and logFC > 2.0
61	PLA2G4A	20.1914	20.5544	20.2816	20.2245	25.0797	24.7855	24.9571	24.9695	8.10513	0	4.63499	REGULATED and logFC > 2.0
70	SOX10	23.1295	20.3762	23.9001	21.1281	26.2463	26.5489	26.8315	27.1385	2.76589	0	4.55783	REGULATED and logFC > 2.0
9	CELF2	22.8755	23.1004	22.7723	22.6686	26.6938	26.9211	27.0269	27.1975	6.98071	0	4.10559	REGULATED and logFC > 2.0
33	SASH1	20.7102	20.6909	20.7404	20.181	24.1806	24.5578	24.3277	24.5633	6.40661	0	3.82672	REGULATED and logFC > 2.0
79	SNTB1	21.2218	21.1517	20.9091	20.0601	24.3666	24.5572	24.4583	24.6294	4.97559	0	3.66724	REGULATED and logFC > 2.0
96	KCTD12	21.149	21.1229	21.5812	20.2165	24.2116	24.0083	24.9576	24.8654	4.08603	0	3.49333	REGULATED and logFC > 2.0
105	SLITRK6	21.3936	21.0033	20.7066	20.5791	24.3031	24.2602	24.4786	24.3593	5.77056	0	3.42967	REGULATED and logFC > 2.0
99	ARAP1	22.1603	22.5693	22.3058	22.1358	25.9708	25.6746	25.3941	25.2296	5.60005	0	3.27449	REGULATED and logFC > 2.0
59	SLC1A4	20.0876	20.6799	20.1855	20.1266	23.5743	23.6497	23.5421	23.1808	5.80417	0	3.2168	REGULATED and logFC > 2.0
101	OSBPL10	20.4794	19.8663	21.4595	21.1411	24.0739	23.7223	23.9467	23.7041	3.85025	0	3.12517	REGULATED and logFC > 2.0
49	NPR3	20.4941	20.2897	20.699	20.788	24.1854	23.5984	23.5104	23.2738	5.03894	0	3.07431	REGULATED and logFC > 2.0
115	PACSIN3	20.2761	20.6875	21.2926	21.2542	23.489	24.1407	23.8737	24.1915	4.34314	0	3.04613	REGULATED and logFC > 2.0
109	ARGLU1	19.7976	21.5064	20.0743	21.1089	24.8106	24.1338	21.4405	24.1402	1.90999	0	3.00949	REGULATED and logFC > 2.0
65	SERPINB9	21.9909	20.7929	20.9793	21.3321	24.1683	24.3475	24.3046	24.2521	4.52547	0	2.9943	REGULATED and logFC > 2.0
84	SLC35F1	21.2687	21.0047	20.1397	20.2033	23.6034	23.975	23.3344	23.4694	4.06212	0	2.94148	REGULATED and logFC > 2.0
26	TPD52	19.6613	20.9107	21.739	21.7088	23.87	24.0305	23.747	24.0324	2.9866	0	2.91507	REGULATED and logFC > 2.0
89	FAHD2B	20.0715	20.8704	20.0492	20.08	23.4715	23.1452	23.0679	23.0069	4.8652	0	2.90512	REGULATED and logFC > 2.0
74	LRP2	21.4744	20.1643	21.3064	21.2682	24.4454	23.9038	23.8108	23.5964	3.7648	0	2.88575	REGULATED and logFC > 2.0
117	CRYL1	20.9684	21.8553	21.9557	20.5828	24.3163	24.1697	24.2479	24.1315	3.83573	0	2.87581	REGULATED and logFC > 2.0
56	CA8	20.7787	20.1147	20.9488	21.2293	23.114	23.881	23.734	23.4251	4.11005	0	2.77062	REGULATED and logFC > 2.0
52	MPZ	21.0817	21.3067	20.8067	20.9144	23.1616	23.8706	23.777	24.1739	4.56147	0	2.71844	REGULATED and logFC > 2.0
97	CNRIP1	20.0912	20.4795	20.3229	20.7219	22.6893	23.0823	23.1277	23.5878	4.6896	0	2.71793	REGULATED and logFC > 2.0
118	STARD13	20.2265	19.7672	20.7215	21.0062	23.2987	23.1179	23.1454	22.9867	4.14555	0	2.70684	REGULATED and logFC > 2.0
30	PDLIM1	24.0245	23.8259	23.5837	24.4808	26.1343	26.9111	26.7136	26.8108	4.31868	0	2.66375	REGULATED and logFC > 2.0
110	PAG1	22.3013	21.4435	22.0331	21.8144	24.3986	24.5177	24.4976	24.6423	5.06529	0	2.61598	REGULATED and logFC > 2.0
34	SVIL	22.5425	21.9066	22.2201	22.0594	25.0822	24.832	24.5109	24.6194	5.06346	0	2.57898	REGULATED and logFC > 2.0
103	WWTR1	20.4543	22.0631	20.7103	20.6484	23.321	23.6001	23.3807	23.7084	3.25995	0	2.53355	REGULATED and logFC > 2.0
27	GATC	19.8289	20.5413	21.1169	21.0752	20.451	23.9246	24.0206	24.2176	1.41448	0.00133333	2.51287	REGULATED and logFC > 2.0
67	CDH6	20.7928	22.135	22.1228	22.0208	23.6942	24.0445	24.9263	24.4546	3.00552	0	2.51203	REGULATED and logFC > 2.0
94	CADM4	20.2134	22.0022	19.2567	20.7548	22.8546	22.9462	23.0631	23.3249	2.28395	0	2.4904	REGULATED and logFC > 2.0
53	SSFA2	21.9043	22.0045	19.181	22.3098	23.8387	24.3158	23.1759	24.0147	1.75328	0.00107865	2.48633	REGULATED and logFC > 2.0
112	FLRT3	22.0506	20.024	21.7795	21.8775	23.952	23.6917	23.884	24.0118	2.66583	0	2.45197	REGULATED and logFC > 2.0
91	MICAL3	20.8677	19.9059	22.528	20.9585	23.8069	23.7331	23.4644	23.0616	2.29976	0	2.45149	REGULATED and logFC > 2.0
10	ZEB2	23.3761	23.6537	23.6197	23.3133	26.2212	25.8719	25.7886	25.7064	5.57039	0	2.40631	REGULATED and logFC > 2.0
104	C1orf198	22.1957	22.1223	20.8254	22.0228	23.6543	24.473	24.1969	24.4454	3.16168	0	2.40086	REGULATED and logFC > 2.0
20	GLTP	22.4026	21.482	22.4447	20.8837	24.3121	24.0091	24.23	23.8609	2.9629	0	2.29977	REGULATED and logFC > 2.0
23	PCBP4	21.7172	21.472	21.2207	21.1005	23.4505	23.7781	23.5768	23.6996	5.17621	0	2.24863	REGULATED and logFC > 2.0
98	MEGF10	19.7777	21.4425	20.2737	21.5221	22.5482	22.9951	23.0119	23.4525	2.51266	0.00109091	2.24794	REGULATED and logFC > 2.0
72	S100A10	22.77	22.9827	23.9526	22.9788	26.3229	25.4675	25.4409	24.3571	2.44044	0.00106667	2.22608	REGULATED and logFC > 2.0
2	PTPRJ	21.7317	21.1488	21.166	21.7356	24.1073	23.3008	23.6591	23.4953	4.02479	0	2.19504	REGULATED and logFC > 2.0
64	GATM	20.1592	20.8164	21.5668	20.9351	22.9596	22.8642	23.1727	23.1822	3.46426	0	2.17528	REGULATED and logFC > 2.0
12	ARVCF	22.0719	20.3578	23.1154	19.9806	23.7135	23.3276	23.2661	23.9195	1.55902	0.00836036	2.17527	REGULATED and logFC > 2.0
47	PLS3	27.6946	27.729	27.797	27.4574	29.9048	29.737	29.717	29.742	6.52377	0	2.10568	REGULATED and logFC > 2.0
116	PDZRN3	22.0458	21.6487	19.9828	21.0819	23.3773	23.3269	23.2392	23.1267	2.43275	0.00129412	2.0777	REGULATED and logFC > 2.0
107	TRIM36	21.4221	20.589	19.79	20.2716	22.6902	22.7916	22.2915	22.4876	2.89002	0.00138947	2.04707	REGULATED and logFC > 2.0
106	NT5DC2	22.6917	22.6549	20.6298	22.2916	24.7547	24.2277	24.0217	23.3774	1.9406	0.00843636	2.02837	REGULATED and logFC > 2.0
95	DOCK10	20.6941	20.6688	20.6655	20.2665	22.9973	22.6238	22.4148	22.2845	4.41996	0.00110345	2.00634	REGULATED and logFC > 2.0
71	SNAP25	20.7643	21.2431	21.5083	20.6239	22.9244	22.8159	23.2469	23.102	3.90984	0.00105495	1.98736	REGULATED but logFC < 2.0
66	CTSC	24.4307	24.2234	23.6541	24.0591	25.6532	26.0985	26.0093	26.3888	3.89427	0.00141935	1.94557	REGULATED but logFC < 2.0
69	DLX1	20.7692	20.9409	21.1689	21.9712	23.0536	23.0256	23.0927	23.3337	3.35972	0.00242308	1.91387	REGULATED but logFC < 2.0
57	AHR	21.2856	21.3462	20.959	21.2209	23.6408	23.1147	23.1431	22.5313	3.64854	0.00130693	1.90457	REGULATED but logFC < 2.0
102	FHDC1	19.9153	20.3022	20.0458	20.35	21.8778	21.9218	21.9216	22.0094	5.51278	0.00209709	1.77931	REGULATED but logFC < 2.0
43	CNP	26.7514	26.6555	26.6464	26.6239	28.2958	28.345	28.6874	28.4578	5.91612	0.00132	1.77722	REGULATED but logFC < 2.0
68	BID	23.5562	23.169	23.2697	23.585	24.9729	24.9083	24.9749	25.3601	4.55166	0.00922034	1.65907	REGULATED but logFC < 2.0
62	NES	30.2099	30.2326	30.4229	30.3313	28.6297	28.8014	28.744	28.6074	6.44354	0.00937931	-1.60356	REGULATED but logFC < 2.0
11	ATP1A2	25.8145	25.9697	26.4079	25.6135	24.5049	23.9807	24.3103	24.0975	3.82058	0.00814035	-1.72804	REGULATED but logFC < 2.0
17	EPHA4	22.7001	22.8221	22.9941	22.3661	21.1464	20.6423	20.8987	21.2664	3.98643	0.00828571	-1.73217	REGULATED but logFC < 2.0
81	INA	23.2385	23.5331	23.2828	23.5584	22.253	21.4245	21.2764	21.6304	3.57678	0.00821239	-1.75714	REGULATED but logFC < 2.0
82	UGT8	24.6599	24.5411	24.753	24.6749	22.694	23.1353	23.1344	22.6159	4.70433	0.0042243	-1.76229	REGULATED but logFC < 2.0
19	ADA	22.932	22.5851	22.5286	22.8245	20.4029	21.5971	20.5157	21.0166	3.14299	0.00585185	-1.83448	REGULATED but logFC < 2.0
93	DYNC2H1	23.0249	23.3129	23.0078	22.9537	20.6794	20.7386	22.2269	21.3124	2.60631	0.00929914	-1.83551	REGULATED but logFC < 2.0
78	FKBP5	25.4593	25.1882	25.2427	25.1032	23.58	23.7	23.2557	23.0628	4.52232	0.00136082	-1.84875	REGULATED but logFC < 2.0
5	SH3BGRL3	27.7276	27.2705	27.4475	27.7149	25.5063	25.4931	25.6116	25.4121	5.61261	0	-2.03435	REGULATED and logFC > 2.0
55	GPC1	24.5299	24.1401	24.0599	24.4561	22.2954	22.4477	21.9397	22.2433	4.92057	0	-2.06499	REGULATED and logFC > 2.0
39	ALPL	23.2407	23.453	23.3774	23.4416	21.0987	21.0081	21.3427	21.6274	5.1433	0	-2.10896	REGULATED and logFC > 2.0
42	CTSB	26.9002	26.7846	27.0209	27.139	24.6526	24.7234	24.7119	24.9942	6.03281	0	-2.19067	REGULATED and logFC > 2.0
40	FABP3	22.9498	23.3346	22.9011	23.5374	20.7815	20.2537	21.1813	21.6725	3.21348	0	-2.20848	REGULATED and logFC > 2.0
8	SPRY4	25.9205	26.0251	25.756	25.6239	23.5691	23.6887	23.5123	23.6765	6.30596	0	-2.21975	REGULATED and logFC > 2.0
92	TMEM132C	23.3844	23.3882	22.6108	23.4078	21.5151	20.2676	20.6642	21.4427	3.07517	0	-2.22542	REGULATED and logFC > 2.0
113	CLIP2	22.788	22.9549	22.7245	22.9342	20.2527	21.1025	20.5676	20.5361	4.69656	0	-2.23566	REGULATED and logFC > 2.0
44	CLU	22.2084	22.9079	23.0686	24.0614	21.6305	21.5382	19.8095	20.3249	2.03907	0.001375	-2.2358	REGULATED and logFC > 2.0
76	AKR1C1;AKR1C2	26.1783	25.7882	25.3816	26.0502	23.9753	23.1968	23.5063	23.673	4.09638	0	-2.26175	REGULATED and logFC > 2.0
7	SLIT2	22.7507	22.6104	22.6987	23.3129	22.3062	19.8644	20.2504	19.8988	2.02233	0.00140426	-2.26321	REGULATED and logFC > 2.0
4	hCG_1642748;PEG10	25.4518	25.1422	25.3078	25.4047	20.1121	23.8637	23.8852	24.1912	1.26119	0.0090087	-2.31355	REGULATED and logFC > 2.0
54	CRABP1	26.8471	26.3539	26.8754	27.2239	24.1361	24.7022	24.301	24.8246	4.14896	0	-2.33407	REGULATED and logFC > 2.0
86	LMNA	23.9702	24.2466	24.3845	24.0508	21.5308	21.004	20.3975	24.174	1.53501	0.0024	-2.38642	REGULATED and logFC > 2.0
3	OSTC	24.7232	24.2164	24.3188	21.1253	20.6006	21.7958	21.202	21.2375	1.48143	0.0029434	-2.38696	REGULATED and logFC > 2.0
114	MALT1	23.1265	23.4343	23.52	23.1778	20.6502	21.3032	21.1518	20.5583	4.60335	0	-2.39875	REGULATED and logFC > 2.0
36	APOE	25.5538	25.5052	24.7689	25.612	22.227	23.1654	22.9086	23.3411	3.62491	0	-2.44944	REGULATED and logFC > 2.0
88	QIL1;C19orf70	23.1269	23.2431	22.992	23.4429	20.2533	20.6937	21.3161	20.697	4.31598	0	-2.46123	REGULATED and logFC > 2.0
29	STRA6	23.6711	23.9966	24.403	23.8838	22.3892	21.3527	19.2113	22.9005	1.64098	0.00104348	-2.52521	REGULATED and logFC > 2.0
15	SDC2	23.5388	23.9117	23.8197	23.517	21.0045	20.5727	20.6486	22.3501	3.01982	0	-2.55281	REGULATED and logFC > 2.0
28	CDH11	24.2315	24.0759	24.0795	23.9659	22.2175	20.9271	22.1587	20.6407	3.12589	0	-2.60223	REGULATED and logFC > 2.0
13	MEST	24.6388	24.5536	24.4993	24.3448	20.8692	22.2961	21.6775	22.7155	3.18182	0	-2.61954	REGULATED and logFC > 2.0
100	CPXM1	23.9148	23.8993	23.3231	23.129	22.1487	20.5818	20.4884	20.5546	2.95271	0	-2.62316	REGULATED and logFC > 2.0
31	PCDH7	22.9129	23.2293	22.8395	23.0473	20.3903	19.2061	20.2597	21.5825	2.76349	0	-2.6476	REGULATED and logFC > 2.0
83	SDK2	25.0947	24.7767	24.8938	20.2071	22.1277	19.2819	22.115	20.7781	1.01038	0.00733945	-2.66737	REGULATED and logFC > 2.0
50	LGALS3	23.3141	23.555	23.5216	23.9456	21.6998	21.0513	19.9606	20.8052	3.39378	0	-2.70482	REGULATED and logFC > 2.0
63	AMPH	23.565	23.513	23.4471	23.5186	21.0211	20.8259	20.3722	20.5656	5.92138	0	-2.81474	REGULATED and logFC > 2.0
14	KRT8	23.7504	23.65	23.6657	24.2043	21.3595	20.7407	20.8103	20.9984	5.24167	0	-2.84037	REGULATED and logFC > 2.0
111	TRMT1	23.7158	23.6697	23.5192	23.3625	20.4303	20.5239	20.5665	21.188	5.28892	0	-2.88963	REGULATED and logFC > 2.0
32	TRIO	23.8736	24.3014	24.325	23.6775	20.1033	20.9877	22.0349	21.0928	3.37773	0	-2.98969	REGULATED and logFC > 2.0
108	SALL1	24.074	24.0895	24.0369	23.992	21.2286	19.9377	20.0356	22.4574	2.73306	0	-3.13331	REGULATED and logFC > 2.0
18	RPL35	26.247	26.4569	26.9308	26.4775	26.2901	19.8558	26.3741	20.7778	0.930565	0.00134694	-3.20358	REGULATED and logFC > 2.0
87	AHDC1	24.4105	24.3779	24.0332	24.5097	21.402	19.9153	21.9242	21.0006	3.52505	0	-3.27232	REGULATED and logFC > 2.0
46	SLC2A3;SLC2A14	24.2383	24.5755	25.1255	24.3303	21.0526	20.7019	21.2433	21.0877	5.33132	0	-3.54603	REGULATED and logFC > 2.0
38	HSPB1	27.6921	27.2543	27.1556	28.6136	23.557	23.9098	24.075	24.9133	3.72372	0	-3.56514	REGULATED and logFC > 2.0
45	SLC2A1	25.2045	24.7516	25.7932	25.3151	21.6651	22.8036	21.4426	20.7888	3.57604	0	-3.59108	REGULATED and logFC > 2.0
21	ZNF423	24.4831	25.2778	24.8683	24.3399	22.3415	20.7813	20.9336	20.5476	3.65297	0	-3.59128	REGULATED and logFC > 2.0
48	DSP	24.8342	25.2299	27.0511	24.8536	22.6786	21.3359	20.9443	22.629	2.70095	0	-3.59525	REGULATED and logFC > 2.0
6	ZIC2	24.095	24.3372	24.3416	24.4682	20.482	20.3663	21.2132	20.4036	5.60319	0	-3.69423	REGULATED and logFC > 2.0
24	CSRP2	24.9635	24.3668	24.6083	24.6984	20.8299	20.7382	20.8559	21.1923	6.43425	0	-3.75516	REGULATED and logFC > 2.0
80	FLNC	24.8224	25.0026	25.3124	25.3144	21.8211	20.5522	21.5026	20.8383	4.78011	0	-3.93437	REGULATED and logFC > 2.0
73	CXADR	24.3828	24.2342	24.3191	24.7124	21.7547	20.1667	20.5585	19.3128	3.58518	0	-3.96395	REGULATED and logFC > 2.0
75	TAGLN	26.2248	25.8689	25.8508	26.3979	22.793	22.0309	21.6355	21.8835	5.09967	0	-3.99989	REGULATED and logFC > 2.0
1	SLC1A3	25.1775	25.3423	25.6365	25.2699	21.1646	20.0587	21.8029	21.8417	4.15587	0	-4.1396	REGULATED and logFC > 2.0
35	ASS1	25.7535	25.5952	25.6024	25.881	21.0971	20.3089	22.5705	20.958	4.0515	0	-4.47441	REGULATED and logFC > 2.0
58	COL18A1	25.0059	25.3052	26.6538	25.2231	22.5925	20.288	20.1727	20.9185	3.29794	0	-4.55404	REGULATED and logFC > 2.0
77	AHNAK	27.9248	28.1648	28.2919	28.2465	22.9184	23.1763	23.4248	23.5622	7.02682	0	-4.88657	REGULATED and logFC > 2.0
22	IQGAP2	27.2492	27.8384	27.548	26.7759	26.4423	20.8922	21.1569	20.6053	1.94237	0	-5.0787	REGULATED and logFC > 2.0
41	NEFL	26.4771	26.4844	26.3819	26.7212	20.7572	21.198	21.058	21.0338	8.20556	0	-5.50438	REGULATED and logFC > 2.0
25	FAM179B	29.6386	30.4973	29.6226	30.7927	30.0308	21.0014	21.3596	20.8896	1.62972	0	-6.81746	REGULATED and logFC > 2.0
16	NEFM	29.8815	29.842	29.9891	30.1092	21.1936	22.3012	19.4698	21.8151	5.10118	0	-8.76054	REGULATED and logFC > 2.0
