# Supplementary material for: CD146-assisted isolation and multi-omics characterisation of human pluripotent stem cell derived cranial Schwann cell precursor-like cells.
Source: Research Square preprint supplement (doi:10.21203/rs.3.rs-3324198/v1), 2023-09-19
Supplement: Supplementary file 14 [file f0a604348c426370ff576059.xlsx]

## Sheet: All
Alternatively Spliced events detected in the data
EID	Chromosome	Strand	Flank1	Flank2	Expressed.Isoforms	Splice.Chain	Symbolic.Splice.Chain	Dimension	Gene.ID	HGNC	Gene.Biotype	Gene.Region	Isoform	Predicted_Isoform_Biotype	Gene.P.adj	Isoform.P.adj	SOXN	SOXP	SOXP.FC	SOXN.FC	SOXP.Nr	SOXN.Nr
D2.event3683	12	+	56160320	56161387	D2.event3683.1,D2.event3683.2	,56160626-56160670^	,1-2^	2	ENSG00000092841	MYL6	protein_coding	CDS.DOM	D2.event3683.1	Known-Coding	6.68e-206	0	0.630664	0.873431	2073, 2072, 1893, 1707, 1598	1772, 1763, 1701, 1483, 1427.5, 1426	2396.36, 2348.07, 2143.95, 1962.72, 1843.48	2755.38, 2736.67, 2735.71, 2376.34, 2349.89, 2219.46
D2.event3683	12	+	56160320	56161387	D2.event3683.1,D2.event3683.2	,56160626-56160670^	,1-2^	2	ENSG00000092841	MYL6	protein_coding	CDS.DOM	D2.event3683.2	Known-Coding	6.68e-206	0	0.369336	0.126569	323.36, 276.07, 255.72, 250.95, 245.48	1035.67, 992.38, 963.71, 922.39, 893.34, 793.46	2396.36, 2348.07, 2143.95, 1962.72, 1843.48	2755.38, 2736.67, 2735.71, 2376.34, 2349.89, 2219.46
D2.event2918	11	+	130122513	130126700	D2.event2918.1,D2.event2918.2	,130123612-130123779^	,1-2^	2	ENSG00000084234	APLP2	protein_coding	CDS.DOM	D2.event2918.1	Known-Coding	6.41e-69	0	0.731791	0.492274	319, 301, 286, 268, 262	647.5, 612, 563, 534.5, 534.5, 525	649.7, 617.24, 557.79, 550.71, 541.89	880.03, 824, 798.33, 737.62, 723.11, 705.65
D2.event2918	11	+	130122513	130126700	D2.event2918.1,D2.event2918.2	,130123612-130123779^	,1-2^	2	ENSG00000084234	APLP2	protein_coding	CDS.DOM	D2.event2918.2	Known-Coding	6.41e-69	0	0.268209	0.507726	330.7, 316.24, 289.79, 279.89, 264.71	235.33, 232.53, 212, 203.12, 198.11, 171.15	649.7, 617.24, 557.79, 550.71, 541.89	880.03, 824, 798.33, 737.62, 723.11, 705.65
D2.event17303	X	-	154355072	154357434	D2.event17303.1,D2.event17303.2	,154357274-154357251^	,1-2^	2	ENSG00000196924	FLNA	protein_coding	CDS.DOM	D2.event17303.1	Known-Coding	2.49e-63	0	0.552041	0.778289	556.5, 438.5, 420, 395, 387	419.5, 345.5, 331, 330.5, 324, 286.5	708.29, 559.46, 535.41, 522.48, 496.44	726.98, 642.83, 605.73, 598.99, 597.37, 516.88
D2.event17303	X	-	154355072	154357434	D2.event17303.1,D2.event17303.2	,154357274-154357251^	,1-2^	2	ENSG00000196924	FLNA	protein_coding	CDS.DOM	D2.event17303.2	Known-Coding	2.49e-63	0	0.447959	0.221711	151.79, 127.48, 120.96, 115.41, 109.44	307.48, 297.33, 275.23, 273.37, 267.99, 230.38	708.29, 559.46, 535.41, 522.48, 496.44	726.98, 642.83, 605.73, 598.99, 597.37, 516.88
D3.event161	1	+	29053312	29064982	D3.event161.1,D3.event161.2,D3.event161.3	,29058589-29058645^29058811-29058852^29060422-29060484^,29060422-29060484^	,1-2^3-4^5-6^,5-6^	3	ENSG00000159023	EPB41	protein_coding	CDS.DOM	D3.event161.2	Known-Coding	2.88e-50	9.5e-45	0.314557	0.0390224	6.13, 5.83, 5.3, 5.11, 3.29	73.72, 64.52, 57.71, 49.28, 46.76, 43.62	142.12, 141.17, 132.58, 131.68, 116.26	201.99, 185.39, 182.49, 177.77, 166.93, 151.24
D3.event161	1	+	29053312	29064982	D3.event161.1,D3.event161.2,D3.event161.3	,29058589-29058645^29058811-29058852^29060422-29060484^,29060422-29060484^	,1-2^3-4^5-6^,5-6^	3	ENSG00000159023	EPB41	protein_coding	CDS.DOM	D3.event161.1	Known-Coding	2.88e-50	4.15e-25	0.229983	0.495499	71, 71, 67, 60, 60	51, 44, 42, 41, 35, 32	142.12, 141.17, 132.58, 131.68, 116.26	201.99, 185.39, 182.49, 177.77, 166.93, 151.24
D3.event161	1	+	29053312	29064982	D3.event161.1,D3.event161.2,D3.event161.3	,29058589-29058645^29058811-29058852^29060422-29060484^,29060422-29060484^	,1-2^3-4^5-6^,5-6^	3	ENSG00000159023	EPB41	protein_coding	CDS.DOM	D3.event161.3	Known-Coding	2.88e-50	1	0.45546	0.465478	68.87, 67.47, 64.99, 54.85, 52.97	90.77, 87.27, 85.06, 78.17, 73.97, 69.96	142.12, 141.17, 132.58, 131.68, 116.26	201.99, 185.39, 182.49, 177.77, 166.93, 151.24
D2.event1810	10	+	7802854	7807659	D2.event1810.1,D2.event1810.2	,7806974-7807010^	,1-2^	2	ENSG00000165629	ATP5C1	protein_coding	CDS.DOM	D2.event1810.2	Known-Coding	3.54e-49	0	0.774376	0.53726	404.7, 396.92, 374.76, 320, 286.83	604.21, 595.59, 562.2, 543.17, 530.76, 525.67	721.7, 717.92, 672.76, 602.83, 598	815.21, 779.59, 721.2, 702.17, 681.76, 645.67
D2.event1810	10	+	7802854	7807659	D2.event1810.1,D2.event1810.2	,7806974-7807010^	,1-2^	2	ENSG00000165629	ATP5C1	protein_coding	CDS.DOM	D2.event1810.1	Known-Coding	3.54e-49	0	0.225624	0.46274	321, 317, 316, 298, 278	211, 184, 159, 159, 151, 120	721.7, 717.92, 672.76, 602.83, 598	815.21, 779.59, 721.2, 702.17, 681.76, 645.67
D2.event6283	16	+	30064505	30067234	D2.event6283.1,D2.event6283.2	,30065876-30065927^	,1-2^	2	ENSG00000149925	ALDOA	protein_coding	UTR-5	D2.event6283.1	UTR-5	5.54e-47	0	0.920484	0.585489	47, 46, 44, 44, 38	490, 471, 414.5, 399, 393.5, 371	79.58, 75.97, 75.22, 75, 68.21	537.77, 504.57, 446.66, 431.41, 423.85, 413.53
D2.event6283	16	+	30064505	30067234	D2.event6283.1,D2.event6283.2	,30065876-30065927^	,1-2^	2	ENSG00000149925	ALDOA	protein_coding	UTR-5	D2.event6283.2	UTR-5	5.54e-47	0	0.079516	0.414511	33.58, 31.22, 31, 30.21, 28.97	47.77, 42.53, 33.57, 32.41, 32.16, 30.35	79.58, 75.97, 75.22, 75, 68.21	537.77, 504.57, 446.66, 431.41, 423.85, 413.53
D2.event12446	3	-	149964904	149968358	D2.event12446.1,D2.event12446.2	149966586-,149966264-	1-,2-	2	ENSG00000070087	PFN2	protein_coding	CDS.DOM	D2.event12446.2	Known-Coding	2.57e-42	0	0.76401	0.884194	768, 733, 678, 658, 643	960, 952, 913, 875.5, 859, 835	881, 830, 766, 743, 716	1248, 1240, 1201, 1172.5, 1122, 1077
D2.event12446	3	-	149964904	149968358	D2.event12446.1,D2.event12446.2	149966586-,149966264-	1-,2-	2	ENSG00000070087	PFN2	protein_coding	CDS.DOM	D2.event12446.1	Known-Coding	2.57e-42	0	0.23599	0.115806	113, 97, 88, 85, 73	297, 288, 288, 288, 263, 242	881, 830, 766, 743, 716	1248, 1240, 1201, 1172.5, 1122, 1077
D3.event16559	9	-	35684550	35685269	D3.event16559.1,D3.event16559.2,D3.event16559.3	35685139-35685064^,35685139-35685064^35684807-35684732^,35684807-35684732^	1-2^,1-2^3-4^,3-4^	3	ENSG00000198467	TPM2	protein_coding	CDS.DOM	D3.event16559.3	Known-Coding	3.75e-37	1.13e-37	0.652559	0.924769	159.46, 154.61, 153.99, 148.31, 138.39	84.49, 69.09, 67.99, 65.45, 61.25, 49.38	174.94, 165.67, 163.98, 157.35, 154.22	129.44, 114.16, 102.26, 98.71, 87.24, 77.56
D3.event16559	9	-	35684550	35685269	D3.event16559.1,D3.event16559.2,D3.event16559.3	35685139-35685064^,35685139-35685064^35684807-35684732^,35684807-35684732^	1-2^,1-2^3-4^,3-4^	3	ENSG00000198467	TPM2	protein_coding	CDS.DOM	D3.event16559.1	Known-Coding	3.75e-37	7.14e-21	0.14003	0.0141397	3, 2.65, 2.24, 2.24, 1.41	20.49, 19.08, 13.08, 12.65, 11.66, 8.37	174.94, 165.67, 163.98, 157.35, 154.22	129.44, 114.16, 102.26, 98.71, 87.24, 77.56
D3.event16559	9	-	35684550	35685269	D3.event16559.1,D3.event16559.2,D3.event16559.3	35685139-35685064^,35685139-35685064^35684807-35684732^,35684807-35684732^	1-2^,1-2^3-4^,3-4^	3	ENSG00000198467	TPM2	protein_coding	CDS.DOM	D3.event16559.2	Frameshift_PTC_50_Any	3.75e-37	1.38e-15	0.207411	0.061091	13.24, 13.18, 8.82, 7.63, 6.99	25.87, 25.68, 20.61, 20.09, 17.62, 16.52	174.94, 165.67, 163.98, 157.35, 154.22	129.44, 114.16, 102.26, 98.71, 87.24, 77.56
ir.D4.event6420	9	-	35684550	35685269	D4.event6420.2,D4.event6420.3,D4.event6420.4	35685139-35685064^35684807-35684732^,35685139-35685064^,35684807-35684732^	1-2^,1-2^3-4^,3-4^	3	ENSG00000198467	TPM2	protein_coding	CDS.DOM	D4.event6420.4	Known-Coding	6.58e-37	4.23e-38	0.642161	0.918382	159.46, 154.61, 154.48, 148.31, 138.39	85.95, 69.09, 67.99, 66.23, 63.06, 49.84	176.23, 166.5, 166.25, 158.27, 155.12	133.23, 115.91, 104.6, 101.97, 91.39, 79.16
ir.D4.event6420	9	-	35684550	35685269	D4.event6420.2,D4.event6420.3,D4.event6420.4	35685139-35685064^35684807-35684732^,35685139-35685064^,35684807-35684732^	1-2^,1-2^3-4^,3-4^	3	ENSG00000198467	TPM2	protein_coding	CDS.DOM	D4.event6420.3	Known-Coding	6.58e-37	3.58e-20	0.137419	0.0148477	3.46, 2.65, 2.45, 2.24, 1.41	20.49, 19.08, 13.42, 13.04, 11.66, 8.37	176.23, 166.5, 166.25, 158.27, 155.12	133.23, 115.91, 104.6, 101.97, 91.39, 79.16
ir.D4.event6420	9	-	35684550	35685269	D4.event6420.2,D4.event6420.3,D4.event6420.4	35685139-35685064^35684807-35684732^,35685139-35685064^,35684807-35684732^	1-2^,1-2^3-4^,3-4^	3	ENSG00000198467	TPM2	protein_coding	CDS.DOM	D4.event6420.2	Frameshift_PTC_50_Any	6.58e-37	2.12e-16	0.22042	0.0667705	14.32, 14.08, 9.4, 8.56, 8.55	28.2, 27.43, 22.7, 22.09, 19.96, 17.66	176.23, 166.5, 166.25, 158.27, 155.12	133.23, 115.91, 104.6, 101.97, 91.39, 79.16
ir.D3.event90	1	+	45606482	45613248	D3.event90.1,D3.event90.2,D3.event90.3	,45606591^45607321-45608337^45613169-,45606591^45613169-	,1^2-3^4-,1^4-	3	ENSG00000132780	NASP	protein_coding	CDS.DOM	D3.event90.3	Known-Coding	2.02e-32	2.27e-34	0.668786	0.529013	387.5, 356, 349, 341, 314	556, 531, 518, 490.5, 443.5, 431	716.14, 677.08, 671.26, 650.08, 588.76	837.3, 790.83, 759.66, 727.31, 678.59, 647.19
ir.D3.event90	1	+	45606482	45613248	D3.event90.1,D3.event90.2,D3.event90.3	,45606591^45607321-45608337^45613169-,45606591^45613169-	,1^2-3^4-,1^4-	3	ENSG00000132780	NASP	protein_coding	CDS.DOM	D3.event90.2	Known-Coding	2.02e-32	6.48e-31	0.263912	0.390531	272.68, 272.34, 263.23, 259.89, 221.91	226.8, 206.84, 193.16, 188.9, 188.59, 167.71	716.14, 677.08, 671.26, 650.08, 588.76	837.3, 790.83, 759.66, 727.31, 678.59, 647.19
ir.D3.event90	1	+	45606482	45613248	D3.event90.1,D3.event90.2,D3.event90.3	,45606591^45607321-45608337^45613169-,45606591^45613169-	,1^2-3^4-,1^4-	3	ENSG00000132780	NASP	protein_coding	CDS.DOM	D3.event90.1	PTC_50_All	2.02e-32	0.461597	0.0673025	0.0804554	59.03, 55.96, 52.85, 49.19, 48.74	54.5, 52.99, 48.5, 48.48, 47.91, 46.5	716.14, 677.08, 671.26, 650.08, 588.76	837.3, 790.83, 759.66, 727.31, 678.59, 647.19
D2.event305	1	+	45606591	45613169	D2.event305.1,D2.event305.2	,45607321-45608337^	,1-2^	2	ENSG00000132780	NASP	protein_coding	CDS	D2.event305.1	Known-Coding	3.92e-28	0	0.716992	0.575291	387.5, 356, 349, 341, 314	556, 531, 518, 490.5, 443.5, 431	660.18, 628.34, 612.23, 600.89, 535.91	782.8, 737.84, 711.16, 679.4, 632.09, 598.71
D2.event305	1	+	45606591	45613169	D2.event305.1,D2.event305.2	,45607321-45608337^	,1-2^	2	ENSG00000132780	NASP	protein_coding	CDS	D2.event305.2	Known-Coding	3.92e-28	0	0.283008	0.424709	272.68, 272.34, 263.23, 259.89, 221.91	226.8, 206.84, 193.16, 188.9, 188.59, 167.71	660.18, 628.34, 612.23, 600.89, 535.91	782.8, 737.84, 711.16, 679.4, 632.09, 598.71
D3.event11020	21	+	46635763	46636896	D3.event11020.1,D3.event11020.2,D3.event11020.3	,46636439-46636547^,46636444-46636547^	,1-3^,2-3^	3	ENSG00000160310	PRMT2	protein_coding	UTR-5	D3.event11020.1	UTR-5	1.07e-26	4.29e-29	0.547087	0.315815	91, 87, 87, 74, 72	129, 119, 117, 110, 107, 99	294.35, 275.97, 247.38, 242.58, 241.23	229.29, 210.58, 208.85, 208.36, 198, 189.61
D3.event11020	21	+	46635763	46636896	D3.event11020.1,D3.event11020.2,D3.event11020.3	,46636439-46636547^,46636444-46636547^	,1-3^,2-3^	3	ENSG00000160310	PRMT2	protein_coding	UTR-5	D3.event11020.2	UTR-5	1.07e-26	1.1e-18	0.327101	0.511248	157.69, 143.25, 127.17, 124.52, 112.96	74.91, 72, 68.7, 66.82, 63.8, 60.83	294.35, 275.97, 247.38, 242.58, 241.23	229.29, 210.58, 208.85, 208.36, 198, 189.61
D3.event11020	21	+	46635763	46636896	D3.event11020.1,D3.event11020.2,D3.event11020.3	,46636439-46636547^,46636444-46636547^	,1-3^,2-3^	3	ENSG00000160310	PRMT2	protein_coding	UTR-5	D3.event11020.3	UTR-5	1.07e-26	0.0184079	0.125812	0.172938	49.66, 45.72, 43.42, 43.41, 42.71	33.76, 29.85, 28.53, 25.38, 21.91, 17.2	294.35, 275.97, 247.38, 242.58, 241.23	229.29, 210.58, 208.85, 208.36, 198, 189.61
ir.D4.event3320	19	+	38709395	38714469	D4.event3320.1,D4.event3320.2,D4.event3320.3,D4.event3320.4	38709476^38710257-38710342^,38709476^38710257-38711361^,38709476^38711276-38711361^,38710342^	1^2-3^,1^2-5^,1^4-5^,3^	4	ENSG00000130402	ACTN4	protein_coding	CDS.DOM	D4.event3320.3	Known-Coding	1.22e-26	9.91e-23	0.254106	0.411337	147.5, 129.48, 122.5, 118.08, 117.13	130.71, 128.24, 124.12, 114.95, 110.44, 94.75	328.4, 314.88, 303.69, 299.12, 296.5	554.96, 517.63, 446.55, 432.22, 429.49, 387.9
ir.D4.event3320	19	+	38709395	38714469	D4.event3320.1,D4.event3320.2,D4.event3320.3,D4.event3320.4	38709476^38710257-38710342^,38709476^38710257-38711361^,38709476^38711276-38711361^,38710342^	1^2-3^,1^2-5^,1^4-5^,3^	4	ENSG00000130402	ACTN4	protein_coding	CDS.DOM	D4.event3320.1	Known-Coding	1.22e-26	5.44e-20	0.335833	0.19609	70.72, 61.77, 59.24, 56.68, 54.07	200.92, 186.34, 158.24, 134.27, 131.14, 119.79	328.4, 314.88, 303.69, 299.12, 296.5	554.96, 517.63, 446.55, 432.22, 429.49, 387.9
ir.D4.event3320	19	+	38709395	38714469	D4.event3320.1,D4.event3320.2,D4.event3320.3,D4.event3320.4	38709476^38710257-38710342^,38709476^38710257-38711361^,38709476^38711276-38711361^,38710342^	1^2-3^,1^2-5^,1^4-5^,3^	4	ENSG00000130402	ACTN4	protein_coding	CDS.DOM	D4.event3320.4	PTC_50_All	1.22e-26	1	0.101943	0.0904725	30.25, 28.5, 27.66, 27.62, 25.4	55.85, 50.82, 47.55, 46.28, 43.58, 37.88	328.4, 314.88, 303.69, 299.12, 296.5	554.96, 517.63, 446.55, 432.22, 429.49, 387.9
ir.D4.event3320	19	+	38709395	38714469	D4.event3320.1,D4.event3320.2,D4.event3320.3,D4.event3320.4	38709476^38710257-38710342^,38709476^38710257-38711361^,38709476^38711276-38711361^,38710342^	1^2-3^,1^2-5^,1^4-5^,3^	4	ENSG00000130402	ACTN4	protein_coding	CDS.DOM	D4.event3320.2	PTC_50_All	1.22e-26	1	0.308118	0.302101	96.56, 95.83, 94.74, 92.6, 86.26	167.48, 159.62, 143.59, 133.99, 128.41, 119.79	328.4, 314.88, 303.69, 299.12, 296.5	554.96, 517.63, 446.55, 432.22, 429.49, 387.9
D2.event5271	14	-	52860465	52864401	D2.event5271.1,D2.event5271.2	,52861034-52861014^	,1-2^	2	ENSG00000073712	FERMT2	protein_coding	CDS.DOM	D2.event5271.1	Known-Coding	7.93e-25	0	0.720839	0.453748	80, 72, 66, 62, 51	161, 150, 142, 126, 125, 122	164.17, 150.23, 146.78, 136.46, 131.46	220.46, 196.37, 194.92, 180.99, 178.96, 173.76
D2.event5271	14	-	52860465	52864401	D2.event5271.1,D2.event5271.2	,52861034-52861014^	,1-2^	2	ENSG00000073712	FERMT2	protein_coding	CDS.DOM	D2.event5271.2	Known-Coding	7.93e-25	0	0.279161	0.546252	84.17, 80.78, 80.46, 78.23, 74.46	59.46, 54.99, 53.96, 52.92, 51.76, 46.37	164.17, 150.23, 146.78, 136.46, 131.46	220.46, 196.37, 194.92, 180.99, 178.96, 173.76
D2.event11151	22	+	23791756	23793559	D2.event11151.1,D2.event11151.2	23791867^,23791894^	1^,2^	2	ENSG00000099956	SMARCB1	protein_coding	CDS	D2.event11151.1	Known-Coding	2.45e-24	0	0.397382	0.615917	246, 221, 209, 199, 171	166, 145, 127, 122, 121, 116	406, 339, 337, 326, 290	371, 349.5, 349, 340, 299, 296
D2.event11151	22	+	23791756	23793559	D2.event11151.1,D2.event11151.2	23791867^,23791894^	1^,2^	2	ENSG00000099956	SMARCB1	protein_coding	CDS	D2.event11151.2	Known-Coding	2.45e-24	0	0.602618	0.384083	160, 138, 119, 118, 117	227, 213, 205, 204.5, 180, 178	406, 339, 337, 326, 290	371, 349.5, 349, 340, 299, 296
D3.event8513	19	+	38709476	38714469	D3.event8513.1,D3.event8513.2,D3.event8513.3	38710257-38710342^,38710257-38711361^,38711276-38711361^	1-2^,1-4^,3-4^	3	ENSG00000130402	ACTN4	protein_coding	CDS.DOM	D3.event8513.3	Known-Coding	6.31e-23	9.37e-20	0.288562	0.461672	147.5, 129.48, 122.5, 118.08, 117.13	130.71, 128.24, 124.12, 114.95, 110.44, 94.75	294.25, 276.79, 270.67, 268.17, 264.1	492.59, 460.36, 396.21, 376.16, 372.82, 343
D3.event8513	19	+	38709476	38714469	D3.event8513.1,D3.event8513.2,D3.event8513.3	38710257-38710342^,38710257-38711361^,38711276-38711361^	1-2^,1-4^,3-4^	3	ENSG00000130402	ACTN4	protein_coding	CDS.DOM	D3.event8513.1	Known-Coding	6.31e-23	1.12e-18	0.380441	0.220236	70.72, 61.77, 59.24, 56.68, 54.07	200.92, 186.34, 158.24, 134.27, 131.14, 119.79	294.25, 276.79, 270.67, 268.17, 264.1	492.59, 460.36, 396.21, 376.16, 372.82, 343
D3.event8513	19	+	38709476	38714469	D3.event8513.1,D3.event8513.2,D3.event8513.3	38710257-38710342^,38710257-38711361^,38711276-38711361^	1-2^,1-4^,3-4^	3	ENSG00000130402	ACTN4	protein_coding	CDS.DOM	D3.event8513.2	PTC_50_All	6.31e-23	1	0.330997	0.318092	90.07, 89.27, 87.99, 87.12, 82.36	160.96, 149.9, 136.83, 123.6, 123.17, 112.77	294.25, 276.79, 270.67, 268.17, 264.1	492.59, 460.36, 396.21, 376.16, 372.82, 343
D2.event1261	1	-	62477700	62488934	D2.event1261.1,D2.event1261.2	62487412-62487398^62477825-,62477834-	1-2^4-,3-	2	ENSG00000116641	DOCK7	protein_coding	CDS.DOM	D2.event1261.1	Known-Coding	6.17e-22	0	0.274696	0.0466768	7, 6.93, 5.92, 4, 3.87	32.5, 31.98, 29.5, 28.5, 21.35, 16.97	141.93, 134, 123.87, 109.92, 94	103.98, 101.5, 96.5, 96.5, 95.35, 90.97
D2.event1261	1	-	62477700	62488934	D2.event1261.1,D2.event1261.2	62487412-62487398^62477825-,62477834-	1-2^4-,3-	2	ENSG00000116641	DOCK7	protein_coding	CDS.DOM	D2.event1261.2	Known-Coding	6.17e-22	0	0.725304	0.953323	135, 127, 120, 104, 90	74, 74, 72, 72, 68, 64	141.93, 134, 123.87, 109.92, 94	103.98, 101.5, 96.5, 96.5, 95.35, 90.97
D3.event9477	2	+	101867212	101869622	D3.event9477.1,D3.event9477.2,D3.event9477.3	101867309^,101867309^101868029-101868037^,101867318^	1^,1^3-4^,2^	3	ENSG00000071054	MAP4K4	protein_coding	CDS	D3.event9477.1	Known-Coding	3.59e-21	0	0.295769	0.116209	48, 44, 42, 40, 38	77, 58, 57, 52, 50, 47	403.5, 392.97, 366.14, 351.61, 326.83	203.94, 200.76, 199.5, 196.5, 191.18, 168.58
D3.event9477	2	+	101867212	101869622	D3.event9477.1,D3.event9477.2,D3.event9477.3	101867309^,101867309^101868029-101868037^,101867318^	1^,1^3-4^,2^	3	ENSG00000071054	MAP4K4	protein_coding	CDS	D3.event9477.2	Known-Coding	3.59e-21	0	0.704231	0.883791	361.5, 343.97, 320.14, 309.61, 287.83	151.94, 142.5, 142.5, 141.76, 118.58, 114.18	403.5, 392.97, 366.14, 351.61, 326.83	203.94, 200.76, 199.5, 196.5, 191.18, 168.58
D2.event2560	11	+	57806035	57806915	D2.event2560.1,D2.event2560.2	,57806461-57806478^	,1-2^	2	ENSG00000198561	CTNND1	protein_coding	CDS	D2.event2560.1	Known-Coding	5.4e-21	0	0.694719	0.423491	92, 75, 74, 72, 66	94, 88, 86, 81, 78, 76	196.47, 189.93, 183.25, 170.4, 155.15	128.5, 125.95, 120.86, 118.4, 117.51, 112.51
D2.event2560	11	+	57806035	57806915	D2.event2560.1,D2.event2560.2	,57806461-57806478^	,1-2^	2	ENSG00000198561	CTNND1	protein_coding	CDS	D2.event2560.2	Known-Coding	5.4e-21	0	0.305281	0.576509	114.93, 111.25, 104.47, 104.4, 81.15	40.4, 39.95, 36.51, 36.51, 34.5, 32.86	196.47, 189.93, 183.25, 170.4, 155.15	128.5, 125.95, 120.86, 118.4, 117.51, 112.51
D2.event16156	8	-	143818534	143821597	D2.event16156.1,D2.event16156.2	,143820716-143820666^	,1-2^	2	ENSG00000179950	PUF60	protein_coding	CDS	D2.event16156.1	Known-Coding	1.54e-20	0	0.496009	0.317025	146, 120, 118.5, 105.5, 98	155.5, 144.5, 127.5, 124.5, 124, 116	441.63, 391.14, 347.45, 346.16, 328.01	321.91, 274.24, 268.13, 249.1, 241.91, 241.71
D2.event16156	8	-	143818534	143821597	D2.event16156.1,D2.event16156.2	,143820716-143820666^	,1-2^	2	ENSG00000179950	PUF60	protein_coding	CDS	D2.event16156.2	Known-Coding	1.54e-20	0	0.503991	0.682975	295.63, 271.14, 240.66, 230.01, 228.95	166.41, 140.63, 133.1, 129.74, 117.71, 117.41	441.63, 391.14, 347.45, 346.16, 328.01	321.91, 274.24, 268.13, 249.1, 241.91, 241.71
D4.event4215	12	-	57751342	57752175	D4.event4215.1,D4.event4215.2,D4.event4215.3	,57751736-57751500^,57751696-57751500^	,1-3^,2-3^	3	ENSG00000135446	CDK4	protein_coding	CDS.DOM	D4.event4215.1	Known-Coding	2.01e-20	4.02e-22	0.0130455	0.0680775	48, 48, 45, 44.5, 37	17, 10, 8, 6, 5, 5	746.91, 707.45, 677.13, 588.14, 570.59	704.2, 677.53, 654.43, 632.77, 620.75, 591.84
D4.event4215	12	-	57751342	57752175	D4.event4215.1,D4.event4215.2,D4.event4215.3	,57751736-57751500^,57751696-57751500^	,1-3^,2-3^	3	ENSG00000135446	CDK4	protein_coding	CDS.DOM	D4.event4215.2	Known-Coding	2.01e-20	2.84e-10	0.914097	0.850125	625.16, 588.85, 570.73, 507.86, 502.32	635.08, 623.17, 603.1, 575.85, 571.73, 540.13	746.91, 707.45, 677.13, 588.14, 570.59	704.2, 677.53, 654.43, 632.77, 620.75, 591.84
D4.event4215	12	-	57751342	57752175	D4.event4215.1,D4.event4215.2,D4.event4215.3	,57751736-57751500^,57751696-57751500^	,1-3^,2-3^	3	ENSG00000135446	CDK4	protein_coding	CDS.DOM	D4.event4215.3	Known-Coding	2.01e-20	1	0.0728574	0.0817974	73.75, 70.6, 61.4, 35.78, 31.27	52.12, 51.92, 46.36, 45.33, 44.02, 41.71	746.91, 707.45, 677.13, 588.14, 570.59	704.2, 677.53, 654.43, 632.77, 620.75, 591.84
D2.event2708	11	+	70420510	70422940	D2.event2708.1,D2.event2708.2	,70421470-70421580^	,1-2^	2	ENSG00000085733	CTTN	protein_coding	CDS.DOM	D2.event2708.1	Known-Coding	4.1e-20	0	0.200055	0.416028	99, 94, 90, 81, 64	49.17, 39.83, 39, 34.33, 30.67, 30	223.71, 216.47, 204.72, 197.93, 185	206.92, 198.42, 194.79, 184.12, 171.97, 158.47
D2.event2708	11	+	70420510	70422940	D2.event2708.1,D2.event2708.2	,70421470-70421580^	,1-2^	2	ENSG00000085733	CTTN	protein_coding	CDS.DOM	D2.event2708.2	Known-Coding	4.1e-20	0	0.799945	0.583972	129.71, 121, 117.47, 116.93, 114.72	158.59, 157.75, 155.79, 149.79, 141.97, 127.8	223.71, 216.47, 204.72, 197.93, 185	206.92, 198.42, 194.79, 184.12, 171.97, 158.47
ir.D5.event4057	2	-	206149096	206153682	D5.event4057.2,D5.event4057.3,D5.event4057.4,D5.event4057.5	206153618^206152510-206152419^206149925-206149818^,206153618^206152510-206152419^206149925-206149780^,206153618^206149925-206149818^,206152419^206149925-206149818^	1^2-3^4-5^,1^2-3^4-6^,1^4-5^,3^4-5^	4	ENSG00000023228	NDUFS1	protein_coding	CDS.DOM	D5.event4057.4	Known-Coding	1.58e-18	1.39e-21	0.148039	0.0461537	17.49, 17.04, 16.48, 15.54, 15.28	84.07, 60, 58.44, 49.43, 49.03, 46.04	400.22, 394.16, 342.45, 327.62, 322.39	443.63, 430.03, 385.21, 365.44, 362.06, 352.29
ir.D5.event4057	2	-	206149096	206153682	D5.event4057.2,D5.event4057.3,D5.event4057.4,D5.event4057.5	206153618^206152510-206152419^206149925-206149818^,206153618^206152510-206152419^206149925-206149780^,206153618^206149925-206149818^,206152419^206149925-206149818^	1^2-3^4-5^,1^2-3^4-6^,1^4-5^,3^4-5^	4	ENSG00000023228	NDUFS1	protein_coding	CDS.DOM	D5.event4057.2	Known-Coding	1.58e-18	0.0169508	0.559344	0.619608	246.18, 245.32, 216.22, 206.16, 193.74	241.25, 236.69, 215.57, 212.46, 211.27, 190.22	400.22, 394.16, 342.45, 327.62, 322.39	443.63, 430.03, 385.21, 365.44, 362.06, 352.29
ir.D5.event4057	2	-	206149096	206153682	D5.event4057.2,D5.event4057.3,D5.event4057.4,D5.event4057.5	206153618^206152510-206152419^206149925-206149818^,206153618^206152510-206152419^206149925-206149780^,206153618^206149925-206149818^,206152419^206149925-206149818^	1^2-3^4-5^,1^2-3^4-6^,1^4-5^,3^4-5^	4	ENSG00000023228	NDUFS1	protein_coding	CDS.DOM	D5.event4057.5	PTC_50_All	1.58e-18	0.512743	0.158216	0.190621	84.9, 65.33, 64.43, 63.06, 62.79	76.25, 69.15, 64.14, 60.49, 51.34, 48.59	400.22, 394.16, 342.45, 327.62, 322.39	443.63, 430.03, 385.21, 365.44, 362.06, 352.29
ir.D5.event4057	2	-	206149096	206153682	D5.event4057.2,D5.event4057.3,D5.event4057.4,D5.event4057.5	206153618^206152510-206152419^206149925-206149818^,206153618^206152510-206152419^206149925-206149780^,206153618^206149925-206149818^,206152419^206149925-206149818^	1^2-3^4-5^,1^2-3^4-6^,1^4-5^,3^4-5^	4	ENSG00000023228	NDUFS1	protein_coding	CDS.DOM	D5.event4057.3	Known-NMD	1.58e-18	1	0.134401	0.143617	65.61, 55.54, 52.51, 45.32, 37.9	64.45, 58.73, 54.17, 54.09, 42.83, 39.96	400.22, 394.16, 342.45, 327.62, 322.39	443.63, 430.03, 385.21, 365.44, 362.06, 352.29
D2.event1512	1	-	154214574	154220342	D2.event1512.1,D2.event1512.2	,154219937-154219836^	,1-2^	2	ENSG00000143612	C1orf43	protein_coding	CDS.DOM	D2.event1512.1	Known-Coding	1.83e-18	0	0.447744	0.643123	179, 178, 156, 149, 132	126, 123, 110, 109, 102, 88	277.47, 263.41, 254.04, 235.42, 204.06	272.13, 256.19, 255.66, 238.44, 226.42, 220.27
D2.event1512	1	-	154214574	154220342	D2.event1512.1,D2.event1512.2	,154219937-154219836^	,1-2^	2	ENSG00000143612	C1orf43	protein_coding	CDS.DOM	D2.event1512.2	Known-Coding	1.83e-18	0	0.552256	0.356877	99.47, 98.04, 86.42, 84.41, 72.06	147.19, 146.13, 132.66, 132.27, 128.44, 124.42	277.47, 263.41, 254.04, 235.42, 204.06	272.13, 256.19, 255.66, 238.44, 226.42, 220.27
ir.D2.event3685	2	+	85542901	85545280	D2.event3685.1,D2.event3685.2	,85543034^85543670-	,1^2-	2	ENSG00000168906	MAT2A	protein_coding	CDS.DOM	D2.event3685.1	Frameshift	6.79e-18	0	0.439734	0.22539	94, 94, 76, 73, 71	128.5, 121, 110, 109, 109, 88	427, 407, 339, 336, 311	297, 281, 261, 246, 222.5, 211
ir.D2.event3685	2	+	85542901	85545280	D2.event3685.1,D2.event3685.2	,85543034^85543670-	,1^2-	2	ENSG00000168906	MAT2A	protein_coding	CDS.DOM	D2.event3685.2	Known-Coding	6.79e-18	0	0.560265	0.77461	333, 331, 266, 242, 240	188, 160, 137, 134.5, 132.5, 101	427, 407, 339, 336, 311	297, 281, 261, 246, 222.5, 211
D2.event15218	7	-	26197732	26200572	D2.event15218.1,D2.event15218.2	,26197866-26197831^	,1-2^	2	ENSG00000122566	HNRNPA2B1	protein_coding	CDS	D2.event15218.1	Known-Coding	7.02e-18	0	0.763306	0.830924	1664, 1470, 1443, 1427, 1243.5	1464, 1433, 1423, 1306, 1290.25, 1223	1975.84, 1768.92, 1756.48, 1722.5, 1496.89	1908.5, 1908.49, 1880, 1704.5, 1698.22, 1565.49
D2.event15218	7	-	26197732	26200572	D2.event15218.1,D2.event15218.2	,26197866-26197831^	,1-2^	2	ENSG00000122566	HNRNPA2B1	protein_coding	CDS	D2.event15218.2	Known-Coding	7.02e-18	0	0.236694	0.169076	325.92, 311.84, 295.5, 286.48, 253.39	475.49, 457, 444.5, 407.97, 398.5, 342.49	1975.84, 1768.92, 1756.48, 1722.5, 1496.89	1908.5, 1908.49, 1880, 1704.5, 1698.22, 1565.49
D2.event16610	9	-	83973399	83974517	D2.event16610.1,D2.event16610.2	,83973973-83973902^	,1-2^	2	ENSG00000165119	HNRNPK	protein_coding	CDS	D2.event16610.2	Known-Coding	1.49e-17	0	0.849357	0.889824	2719.21, 2532.89, 2470.94, 2316.39, 2173.23	2156.61, 2144.08, 2016.83, 1977.05, 1833.95, 1774.97	3064.21, 2852.89, 2768.94, 2598.39, 2440.23	2530.61, 2515.08, 2399.83, 2335.05, 2143.95, 2089.97
D2.event16610	9	-	83973399	83974517	D2.event16610.1,D2.event16610.2	,83973973-83973902^	,1-2^	2	ENSG00000165119	HNRNPK	protein_coding	CDS	D2.event16610.1	Known-Coding	1.49e-17	0	0.150643	0.110176	345, 320, 298, 282, 267	383, 374, 371, 358, 315, 310	3064.21, 2852.89, 2768.94, 2598.39, 2440.23	2530.61, 2515.08, 2399.83, 2335.05, 2143.95, 2089.97
D2.event3658	12	+	54282874	54283812	D2.event3658.1,D2.event3658.2	,54283079-54283234^	,1-2^	2	ENSG00000135486	HNRNPA1	protein_coding	CDS	D2.event3658.1	Known-Coding	6.78e-17	0	0.856534	0.892422	3732.33, 3423, 3211.17, 3157.25, 2920.33	3384.83, 3218.08, 3038.75, 3012, 2937.83, 2859.14	4184.01, 3857.99, 3578.48, 3538.14, 3267.74	3938.22, 3713.12, 3567.53, 3525.67, 3457.47, 3337.37
D2.event3658	12	+	54282874	54283812	D2.event3658.1,D2.event3658.2	,54283079-54283234^	,1-2^	2	ENSG00000135486	HNRNPA1	protein_coding	CDS	D2.event3658.2	Known-Coding	6.78e-17	0	0.143466	0.107578	451.68, 434.99, 380.89, 367.31, 347.41	553.39, 528.78, 519.64, 513.67, 495.04, 478.23	4184.01, 3857.99, 3578.48, 3538.14, 3267.74	3938.22, 3713.12, 3567.53, 3525.67, 3457.47, 3337.37
D4.event10443	2	-	206149096	206153618	D4.event10443.2,D4.event10443.3,D4.event10443.4	206152510-206152419^206149925-206149818^,206152510-206152419^206149925-206149780^,206149925-206149818^	1-2^3-4^,1-2^3-5^,3-4^	3	ENSG00000023228	NDUFS1	protein_coding	CDS.DOM	D4.event10443.4	Known-Coding	7.38e-17	5.2e-19	0.17577	0.0572098	17.49, 17.04, 16.48, 15.54, 15.28	84.07, 60, 58.44, 49.43, 49.03, 46.04	328.83, 315.32, 278.02, 264.56, 259.6	379.49, 353.78, 316.06, 314.1, 303.7, 301.57
D4.event10443	2	-	206149096	206153618	D4.event10443.2,D4.event10443.3,D4.event10443.4	206152510-206152419^206149925-206149818^,206152510-206152419^206149925-206149780^,206149925-206149818^	1-2^3-4^,1-2^3-5^,3-4^	3	ENSG00000023228	NDUFS1	protein_coding	CDS.DOM	D4.event10443.2	Known-Coding	7.38e-17	6.46e-07	0.66452	0.765375	246.18, 245.32, 216.22, 206.16, 193.74	241.25, 236.69, 215.57, 212.46, 211.27, 190.22	328.83, 315.32, 278.02, 264.56, 259.6	379.49, 353.78, 316.06, 314.1, 303.7, 301.57
D4.event10443	2	-	206149096	206153618	D4.event10443.2,D4.event10443.3,D4.event10443.4	206152510-206152419^206149925-206149818^,206152510-206152419^206149925-206149780^,206149925-206149818^	1-2^3-4^,1-2^3-5^,3-4^	3	ENSG00000023228	NDUFS1	protein_coding	CDS.DOM	D4.event10443.3	Known-NMD	7.38e-17	1	0.15971	0.177415	65.61, 55.54, 52.51, 45.32, 37.9	64.45, 58.73, 54.17, 54.09, 42.83, 39.96	328.83, 315.32, 278.02, 264.56, 259.6	379.49, 353.78, 316.06, 314.1, 303.7, 301.57
ir.D5.event1656	12	-	57751207	57752175	D5.event1656.1,D5.event1656.2,D5.event1656.3,D5.event1656.5	57751736-,57751736-57751500^57751342-,57751696-57751500^57751342-,57751342-	1-,1-3^4-,2-3^4-,4-	4	ENSG00000135446	CDK4	protein_coding	CDS.DOM	D5.event1656.5	Known-Coding	1.47e-16	1.41e-18	0.0120637	0.0637964	48, 48, 45, 44.5, 37	17, 10, 8, 6, 5, 5	806.25, 769.87, 697.91, 637.31, 614.58	763.9, 739.13, 705.96, 695.51, 688.23, 636.7
ir.D5.event1656	12	-	57751207	57752175	D5.event1656.1,D5.event1656.2,D5.event1656.3,D5.event1656.5	57751736-,57751736-57751500^57751342-,57751696-57751500^57751342-,57751342-	1-,1-3^4-,2-3^4-,4-	4	ENSG00000135446	CDK4	protein_coding	CDS.DOM	D5.event1656.2	Known-Coding	1.47e-16	0.00564123	0.838419	0.794118	625.16, 588.85, 570.73, 507.86, 502.32	635.08, 623.17, 603.1, 575.85, 571.73, 540.13	806.25, 769.87, 697.91, 637.31, 614.58	763.9, 739.13, 705.96, 695.51, 688.23, 636.7
ir.D5.event1656	12	-	57751207	57752175	D5.event1656.1,D5.event1656.2,D5.event1656.3,D5.event1656.5	57751736-,57751736-57751500^57751342-,57751696-57751500^57751342-,57751342-	1-,1-3^4-,2-3^4-,4-	4	ENSG00000135446	CDK4	protein_coding	CDS.DOM	D5.event1656.1	PTC_50_All	1.47e-16	1	0.0824895	0.0659129	62.42, 59.34, 49.17, 43.99, 20.78	67.48, 62.74, 61.6, 59.7, 51.53, 44.86	806.25, 769.87, 697.91, 637.31, 614.58	763.9, 739.13, 705.96, 695.51, 688.23, 636.7
ir.D5.event1656	12	-	57751207	57752175	D5.event1656.1,D5.event1656.2,D5.event1656.3,D5.event1656.5	57751736-,57751736-57751500^57751342-,57751696-57751500^57751342-,57751342-	1-,1-3^4-,2-3^4-,4-	4	ENSG00000135446	CDK4	protein_coding	CDS.DOM	D5.event1656.3	Known-Coding	1.47e-16	1	0.0670277	0.0761724	73.75, 70.6, 61.4, 35.78, 31.27	52.12, 51.92, 46.36, 45.33, 44.02, 41.71	806.25, 769.87, 697.91, 637.31, 614.58	763.9, 739.13, 705.96, 695.51, 688.23, 636.7
ir.D4.event1381	12	+	54282874	54284317	D4.event1381.1,D4.event1381.2,D4.event1381.3,D4.event1381.4	54283079-54283234^54283812-54283967^54284258-,54283079-54283967^54284258-,54283812-,54283812-54283967^54284258-	1-2^3-4^5-,1-4^5-,3-,3-4^5-	4	ENSG00000135486	HNRNPA1	protein_coding	CDS.DOM	D4.event1381.4	Known-Coding	6.12e-16	9.21e-18	0.680666	0.72094	5071.68, 4694.87, 4360.86, 4335.7, 4186.22	4552.38, 4370.8, 4229.49, 4068.23, 4021, 3983.81	7066.55, 6556.81, 6030.63, 5999.6, 5763.55	6671.45, 6331.71, 6181.64, 6082.89, 5944.95, 5844.9
ir.D4.event1381	12	+	54282874	54284317	D4.event1381.1,D4.event1381.2,D4.event1381.3,D4.event1381.4	54283079-54283234^54283812-54283967^54284258-,54283079-54283967^54284258-,54283812-,54283812-54283967^54284258-	1-2^3-4^5-,1-4^5-,3-,3-4^5-	4	ENSG00000135486	HNRNPA1	protein_coding	CDS.DOM	D4.event1381.1	Known-Coding	6.12e-16	8.84e-13	0.186343	0.158125	1120.29, 1069.09, 952.37, 927.93, 899.2	1233.96, 1180.72, 1150.09, 1133.11, 1123.04, 1082.79	7066.55, 6556.81, 6030.63, 5999.6, 5763.55	6671.45, 6331.71, 6181.64, 6082.89, 5944.95, 5844.9
ir.D4.event1381	12	+	54282874	54284317	D4.event1381.1,D4.event1381.2,D4.event1381.3,D4.event1381.4	54283079-54283234^54283812-54283967^54284258-,54283079-54283967^54284258-,54283812-,54283812-54283967^54284258-	1-2^3-4^5-,1-4^5-,3-,3-4^5-	4	ENSG00000135486	HNRNPA1	protein_coding	CDS.DOM	D4.event1381.2	PTC_50_All	6.12e-16	0.0056749	0.0874998	0.0773618	557.13, 506.23, 473.09, 451.13, 442.57	593.56, 561.72, 556, 524.9, 505.36, 500.46	7066.55, 6556.81, 6030.63, 5999.6, 5763.55	6671.45, 6331.71, 6181.64, 6082.89, 5944.95, 5844.9
ir.D4.event1381	12	+	54282874	54284317	D4.event1381.1,D4.event1381.2,D4.event1381.3,D4.event1381.4	54283079-54283234^54283812-54283967^54284258-,54283079-54283967^54284258-,54283812-,54283812-54283967^54284258-	1-2^3-4^5-,1-4^5-,3-,3-4^5-	4	ENSG00000135486	HNRNPA1	protein_coding	CDS.DOM	D4.event1381.3	PTC_50_All	6.12e-16	1	0.0454908	0.0435736	317.45, 286.62, 269.47, 259.68, 235.56	329.11, 295.55, 277.84, 271.01, 266.08, 246.53	7066.55, 6556.81, 6030.63, 5999.6, 5763.55	6671.45, 6331.71, 6181.64, 6082.89, 5944.95, 5844.9
ir.D5.event1917	14	+	69768798	69770540	D5.event1917.1,D5.event1917.2,D5.event1917.3,D5.event1917.4,D5.event1917.5	,69768896^69769182-,69768896^69769182-69769251^69769511-,69768896^69769182-69769251^69770467-,69769251^69770467-	,1^2-,1^2-3^4-,1^2-3^5-,3^5-	5	ENSG00000100650	SRSF5	protein_coding	CDS.DOM	D5.event1917.4	Known-Coding	2.03e-15	3.61e-15	0.588553	0.481451	306.74, 288.63, 275.9, 274.71, 229.83	520.55, 519.61, 445.98, 444.85, 437.24, 391.35	622.07, 591.17, 581.88, 565.87, 495.86	898.11, 833.29, 806.07, 779.31, 714.92, 656.88
ir.D5.event1917	14	+	69768798	69770540	D5.event1917.1,D5.event1917.2,D5.event1917.3,D5.event1917.4,D5.event1917.5	,69768896^69769182-,69768896^69769182-69769251^69769511-,69768896^69769182-69769251^69770467-,69769251^69770467-	,1^2-,1^2-3^4-,1^2-3^5-,3^5-	5	ENSG00000100650	SRSF5	protein_coding	CDS.DOM	D5.event1917.2	PTC_50_All	2.03e-15	6.04e-08	0.19721	0.262883	172.42, 157.84, 153.05, 139.75, 128.07	191.98, 179.06, 153.45, 148.33, 130.15, 122.54	622.07, 591.17, 581.88, 565.87, 495.86	898.11, 833.29, 806.07, 779.31, 714.92, 656.88
ir.D5.event1917	14	+	69768798	69770540	D5.event1917.1,D5.event1917.2,D5.event1917.3,D5.event1917.4,D5.event1917.5	,69768896^69769182-,69768896^69769182-69769251^69769511-,69768896^69769182-69769251^69770467-,69769251^69770467-	,1^2-,1^2-3^4-,1^2-3^5-,3^5-	5	ENSG00000100650	SRSF5	protein_coding	CDS.DOM	D5.event1917.1	PTC_50_All	2.03e-15	0.000598394	0.0409355	0.0659976	45.89, 36.03, 36.03, 36, 34.35	39.4, 37.52, 33.59, 28.91, 27.11, 25.1	622.07, 591.17, 581.88, 565.87, 495.86	898.11, 833.29, 806.07, 779.31, 714.92, 656.88
ir.D5.event1917	14	+	69768798	69770540	D5.event1917.1,D5.event1917.2,D5.event1917.3,D5.event1917.4,D5.event1917.5	,69768896^69769182-,69768896^69769182-69769251^69769511-,69768896^69769182-69769251^69770467-,69769251^69770467-	,1^2-,1^2-3^4-,1^2-3^5-,3^5-	5	ENSG00000100650	SRSF5	protein_coding	CDS.DOM	D5.event1917.3	Known-NMD	2.03e-15	0.134399	0.0516182	0.0691314	49.21, 44.56, 38.31, 37.28, 28.18	50.05, 50.05, 40.47, 38.11, 34.03, 29.29	622.07, 591.17, 581.88, 565.87, 495.86	898.11, 833.29, 806.07, 779.31, 714.92, 656.88
ir.D5.event1917	14	+	69768798	69770540	D5.event1917.1,D5.event1917.2,D5.event1917.3,D5.event1917.4,D5.event1917.5	,69768896^69769182-,69768896^69769182-69769251^69769511-,69768896^69769182-69769251^69770467-,69769251^69770467-	,1^2-,1^2-3^4-,1^2-3^5-,3^5-	5	ENSG00000100650	SRSF5	protein_coding	CDS.DOM	D5.event1917.5	PTC_50_All	2.03e-15	1	0.121683	0.120537	76.82, 70.82, 68.85, 64.65, 62.93	106.65, 101.47, 97.37, 93.46, 86.59, 84.32	622.07, 591.17, 581.88, 565.87, 495.86	898.11, 833.29, 806.07, 779.31, 714.92, 656.88
ir.D2.event5194	5	+	83579980	83581336	D2.event5194.1,D2.event5194.2	,83580162^83580307-	,1^2-	2	ENSG00000038427	VCAN	protein_coding	CDS.DOM	D2.event5194.1	In-Frame-Change	2.03e-15	0	0.205897	0.313698	175, 142.5, 141.5, 134, 119	194, 185, 184.5, 182, 171.5, 157	496, 457.5, 448.5, 447, 419	965, 940.5, 875, 860.5, 796, 785
ir.D2.event5194	5	+	83579980	83581336	D2.event5194.1,D2.event5194.2	,83580162^83580307-	,1^2-	2	ENSG00000038427	VCAN	protein_coding	CDS.DOM	D2.event5194.2	Known-Coding	2.03e-15	0	0.794103	0.686302	321, 315, 313, 307, 300	771, 756, 690, 689, 628, 614	496, 457.5, 448.5, 447, 419	965, 940.5, 875, 860.5, 796, 785
ir.D5.event1247	11	-	85959060	85981228	D5.event1247.1,D5.event1247.2,D5.event1247.3,D5.event1247.4,D5.event1247.5	85981129^,85981129^85978093-85978070^85976682-85976623^85974812-85974708^,85981129^85976682-85976623^85974812-85974708^,85981129^85974812-85974708^,85978070^85976682-85976623^85974812-85974708^	1^,1^2-3^4-5^6-7^,1^4-5^6-7^,1^6-7^,3^4-5^6-7^	5	ENSG00000073921	PICALM	protein_coding	CDS	D5.event1247.2	Known-Coding	1.22e-14	2.17e-10	0.214639	0.126348	51.36, 48.45, 43.4, 36.56, 36.27	89.02, 60.59, 58.19, 55.76, 55.69, 53.81	374.19, 358.45, 349.07, 329.87, 298.3	355.78, 289.46, 287.78, 282.48, 272.7, 249.88
ir.D5.event1247	11	-	85959060	85981228	D5.event1247.1,D5.event1247.2,D5.event1247.3,D5.event1247.4,D5.event1247.5	85981129^,85981129^85978093-85978070^85976682-85976623^85974812-85974708^,85981129^85976682-85976623^85974812-85974708^,85981129^85974812-85974708^,85978070^85976682-85976623^85974812-85974708^	1^,1^2-3^4-5^6-7^,1^4-5^6-7^,1^6-7^,3^4-5^6-7^	5	ENSG00000073921	PICALM	protein_coding	CDS	D5.event1247.4	Known-Coding	1.22e-14	4.79e-07	0.158681	0.236227	93.72, 84.85, 83.9, 71.24, 70.21	53.03, 48.93, 46.65, 44.36, 43.58, 39.25	374.19, 358.45, 349.07, 329.87, 298.3	355.78, 289.46, 287.78, 282.48, 272.7, 249.88
ir.D5.event1247	11	-	85959060	85981228	D5.event1247.1,D5.event1247.2,D5.event1247.3,D5.event1247.4,D5.event1247.5	85981129^,85981129^85978093-85978070^85976682-85976623^85974812-85974708^,85981129^85976682-85976623^85974812-85974708^,85981129^85974812-85974708^,85978070^85976682-85976623^85974812-85974708^	1^,1^2-3^4-5^6-7^,1^4-5^6-7^,1^6-7^,3^4-5^6-7^	5	ENSG00000073921	PICALM	protein_coding	CDS	D5.event1247.5	PTC_50_All	1.22e-14	0.0127249	0.149867	0.108224	41.63, 41.14, 38.2, 33.34, 30.74	54.45, 43.34, 43.24, 40.71, 39.85, 38.89	374.19, 358.45, 349.07, 329.87, 298.3	355.78, 289.46, 287.78, 282.48, 272.7, 249.88
ir.D5.event1247	11	-	85959060	85981228	D5.event1247.1,D5.event1247.2,D5.event1247.3,D5.event1247.4,D5.event1247.5	85981129^,85981129^85978093-85978070^85976682-85976623^85974812-85974708^,85981129^85976682-85976623^85974812-85974708^,85981129^85974812-85974708^,85978070^85976682-85976623^85974812-85974708^	1^,1^2-3^4-5^6-7^,1^4-5^6-7^,1^6-7^,3^4-5^6-7^	5	ENSG00000073921	PICALM	protein_coding	CDS	D5.event1247.3	Known-Coding	1.22e-14	0.118795	0.435389	0.484753	189.26, 178.12, 157.06, 155.67, 148.76	151.28, 128.57, 127.45, 122.51, 120, 106.93	374.19, 358.45, 349.07, 329.87, 298.3	355.78, 289.46, 287.78, 282.48, 272.7, 249.88
ir.D5.event1247	11	-	85959060	85981228	D5.event1247.1,D5.event1247.2,D5.event1247.3,D5.event1247.4,D5.event1247.5	85981129^,85981129^85978093-85978070^85976682-85976623^85974812-85974708^,85981129^85976682-85976623^85974812-85974708^,85981129^85974812-85974708^,85978070^85976682-85976623^85974812-85974708^	1^,1^2-3^4-5^6-7^,1^4-5^6-7^,1^6-7^,3^4-5^6-7^	5	ENSG00000073921	PICALM	protein_coding	CDS	D5.event1247.1	Known-Coding	1.22e-14	1	0.041425	0.0444475	21, 17, 17, 11, 10	15, 15, 12, 11, 11, 8	374.19, 358.45, 349.07, 329.87, 298.3	355.78, 289.46, 287.78, 282.48, 272.7, 249.88
ir.D7.event1975	14	-	21234229	21269298	D7.event1975.1,D7.event1975.2,D7.event1975.3,D7.event1975.4,D7.event1975.5,D7.event1975.6,D7.event1975.7	,21268668-21268623^21263336-21263311^,21263829-21263667^21263336-21263311^,21263829-21263620^21263336-21263311^,21263829-21263311^,21263336-21263311^,21263336-21263311^21236460-21236373^	,1-2^6-7^,3-4^6-7^,3-5^6-7^,3-7^,6-7^,6-7^8-9^	7	ENSG00000092199	HNRNPC	protein_coding	UTR-5	D7.event1975.6	UTR-5	2.64e-14	5.24e-10	0.658339	0.606996	2362.6, 2187.2, 2057.59, 1952.67, 1928.47	2706.38, 2661.11, 2537.17, 2515.27, 2356.02, 2152.96	3870.86, 3507.46, 3397.81, 3258.37, 3233.52	4137.71, 3959.11, 3882.45, 3821.92, 3568.52, 3304.1
ir.D7.event1975	14	-	21234229	21269298	D7.event1975.1,D7.event1975.2,D7.event1975.3,D7.event1975.4,D7.event1975.5,D7.event1975.6,D7.event1975.7	,21268668-21268623^21263336-21263311^,21263829-21263667^21263336-21263311^,21263829-21263620^21263336-21263311^,21263829-21263311^,21263336-21263311^,21263336-21263311^21236460-21236373^	,1-2^6-7^,3-4^6-7^,3-5^6-7^,3-7^,6-7^,6-7^8-9^	7	ENSG00000092199	HNRNPC	protein_coding	UTR-5	D7.event1975.1	UTR-5	2.64e-14	3.34e-09	0.157225	0.196006	789, 679, 649.5, 642, 626.5	631, 624.5, 605.5, 571.5, 567, 559	3870.86, 3507.46, 3397.81, 3258.37, 3233.52	4137.71, 3959.11, 3882.45, 3821.92, 3568.52, 3304.1
ir.D7.event1975	14	-	21234229	21269298	D7.event1975.1,D7.event1975.2,D7.event1975.3,D7.event1975.4,D7.event1975.5,D7.event1975.6,D7.event1975.7	,21268668-21268623^21263336-21263311^,21263829-21263667^21263336-21263311^,21263829-21263620^21263336-21263311^,21263829-21263311^,21263336-21263311^,21263336-21263311^21236460-21236373^	,1-2^6-7^,3-4^6-7^,3-5^6-7^,3-7^,6-7^,6-7^8-9^	7	ENSG00000092199	HNRNPC	protein_coding	UTR-5	D7.event1975.5	UTR-5	2.64e-14	0.00326	0.0631508	0.0794167	314.71, 275.43, 274.28, 253.56, 251.84	259.88, 250.04, 248.63, 236.84, 233.91, 199.38	3870.86, 3507.46, 3397.81, 3258.37, 3233.52	4137.71, 3959.11, 3882.45, 3821.92, 3568.52, 3304.1
ir.D7.event1975	14	-	21234229	21269298	D7.event1975.1,D7.event1975.2,D7.event1975.3,D7.event1975.4,D7.event1975.5,D7.event1975.6,D7.event1975.7	,21268668-21268623^21263336-21263311^,21263829-21263667^21263336-21263311^,21263829-21263620^21263336-21263311^,21263829-21263311^,21263336-21263311^,21263336-21263311^21236460-21236373^	,1-2^6-7^,3-4^6-7^,3-5^6-7^,3-7^,6-7^,6-7^8-9^	7	ENSG00000092199	HNRNPC	protein_coding	UTR-5	D7.event1975.2	UTR-5	2.64e-14	0.00867	0.0411368	0.0302251	124.16, 114.11, 96.52, 96.38, 89.42	198.09, 160.31, 156.7, 149.94, 142.61, 125.07	3870.86, 3507.46, 3397.81, 3258.37, 3233.52	4137.71, 3959.11, 3882.45, 3821.92, 3568.52, 3304.1
ir.D7.event1975	14	-	21234229	21269298	D7.event1975.1,D7.event1975.2,D7.event1975.3,D7.event1975.4,D7.event1975.5,D7.event1975.6,D7.event1975.7	,21268668-21268623^21263336-21263311^,21263829-21263667^21263336-21263311^,21263829-21263620^21263336-21263311^,21263829-21263311^,21263336-21263311^,21263336-21263311^21236460-21236373^	,1-2^6-7^,3-4^6-7^,3-5^6-7^,3-7^,6-7^,6-7^8-9^	7	ENSG00000092199	HNRNPC	protein_coding	UTR-5	D7.event1975.4	UTR-5	2.64e-14	1	0.036619	0.0417266	170.72, 154.82, 142.6, 133.52, 118.32	180.72, 160.03, 133.81, 129.49, 115.75, 112.45	3870.86, 3507.46, 3397.81, 3258.37, 3233.52	4137.71, 3959.11, 3882.45, 3821.92, 3568.52, 3304.1
ir.D7.event1975	14	-	21234229	21269298	D7.event1975.1,D7.event1975.2,D7.event1975.3,D7.event1975.4,D7.event1975.5,D7.event1975.6,D7.event1975.7	,21268668-21268623^21263336-21263311^,21263829-21263667^21263336-21263311^,21263829-21263620^21263336-21263311^,21263829-21263311^,21263336-21263311^,21263336-21263311^21236460-21236373^	,1-2^6-7^,3-4^6-7^,3-5^6-7^,3-7^,6-7^,6-7^8-9^	7	ENSG00000092199	HNRNPC	protein_coding	UTR-5	D7.event1975.3	UTR-5	2.64e-14	1	0.0326871	0.0356202	136.39, 133.62, 120.65, 112.39, 109.76	150.62, 148.23, 141.47, 134.11, 89.26, 83.66	3870.86, 3507.46, 3397.81, 3258.37, 3233.52	4137.71, 3959.11, 3882.45, 3821.92, 3568.52, 3304.1
ir.D7.event1975	14	-	21234229	21269298	D7.event1975.1,D7.event1975.2,D7.event1975.3,D7.event1975.4,D7.event1975.5,D7.event1975.6,D7.event1975.7	,21268668-21268623^21263336-21263311^,21263829-21263667^21263336-21263311^,21263829-21263620^21263336-21263311^,21263829-21263311^,21263336-21263311^,21263336-21263311^21236460-21236373^	,1-2^6-7^,3-4^6-7^,3-5^6-7^,3-7^,6-7^,6-7^8-9^	7	ENSG00000092199	HNRNPC	protein_coding	UTR-5	D7.event1975.7	UTR-5	2.64e-14	1	0.0108428	0.0100097	40.68, 36.14, 34.55, 30.23, 28.69	52.43, 52.41, 46.42, 31.45, 31.45, 31.24	3870.86, 3507.46, 3397.81, 3258.37, 3233.52	4137.71, 3959.11, 3882.45, 3821.92, 3568.52, 3304.1
ir.D3.event5894	7	+	74189918	74194878	D3.event5894.1,D3.event5894.2,D3.event5894.3	74190247-,74190247-74190306^74194741-,74194741-	1-,1-2^3-,3-	3	ENSG00000106682	EIF4H	protein_coding	CDS	D3.event5894.3	Known-Coding	4.07e-14	3.7e-15	0.702797	0.597261	385.5, 379, 355, 347.5, 321	428, 399.5, 396.5, 359, 355, 348.5	657.03, 620.73, 620.1, 552.3, 543.86	586.8, 572.46, 561.7, 521.68, 507, 503.14
ir.D3.event5894	7	+	74189918	74194878	D3.event5894.1,D3.event5894.2,D3.event5894.3	74190247-,74190247-74190306^74194741-,74194741-	1-,1-2^3-,3-	3	ENSG00000106682	EIF4H	protein_coding	CDS	D3.event5894.2	Known-Coding	4.07e-14	1.66e-14	0.219796	0.315504	216.48, 216.18, 185.96, 173.5, 152.99	132.34, 126, 123.67, 117.45, 107.7, 107.67	657.03, 620.73, 620.1, 552.3, 543.86	586.8, 572.46, 561.7, 521.68, 507, 503.14
ir.D3.event5894	7	+	74189918	74194878	D3.event5894.1,D3.event5894.2,D3.event5894.3	74190247-,74190247-74190306^74194741-,74194741-	1-,1-2^3-,3-	3	ENSG00000106682	EIF4H	protein_coding	CDS	D3.event5894.1	PTC_50_All	4.07e-14	1	0.0774071	0.087235	57.05, 55.14, 55.05, 49.36, 44.31	46.96, 41.53, 41.35, 40.84, 40.47, 40.3	657.03, 620.73, 620.1, 552.3, 543.86	586.8, 572.46, 561.7, 521.68, 507, 503.14
D2.event12755	4	+	108620590	108621951	D2.event12755.1,D2.event12755.2	108620600^,108620712^	1^,2^	2	ENSG00000109475	RPL34	protein_coding	UTR-5	D2.event12755.1	UTR-5	8.93e-14	0	0.88449	0.944329	1104, 953.5, 938.5, 905, 830.5	969, 854, 812.5, 802.5, 733, 718.5	1169, 1007.5, 995.5, 951, 885.5	1076, 953, 924.5, 890.5, 848.5, 834
D2.event12755	4	+	108620590	108621951	D2.event12755.1,D2.event12755.2	108620600^,108620712^	1^,2^	2	ENSG00000109475	RPL34	protein_coding	UTR-5	D2.event12755.2	UTR-5	8.93e-14	0	0.11551	0.0556714	65, 57, 55, 54, 46	130, 112, 107, 101, 99, 88	1169, 1007.5, 995.5, 951, 885.5	1076, 953, 924.5, 890.5, 848.5, 834
ir.D4.event1753	12	-	124778586	124786503	D4.event1753.1,D4.event1753.2,D4.event1753.3,D4.event1753.4	124786357^,124786357^124782811-124782683^,124786107^,124782683^	1^,1^3-4^,2^,4^	4	ENSG00000073060	SCARB1	protein_coding	CDS.DOM	D4.event1753.1	Known-Coding	9.89e-14	9e-14	0.509324	0.822285	40, 39, 38, 32, 29	43, 33, 32, 31, 28, 25	51.16, 50.91, 45.16, 41.73, 36.51	76.39, 68.51, 63.36, 60.18, 57.71, 57.32
ir.D4.event1753	12	-	124778586	124786503	D4.event1753.1,D4.event1753.2,D4.event1753.3,D4.event1753.4	124786357^,124786357^124782811-124782683^,124786107^,124782683^	1^,1^3-4^,2^,4^	4	ENSG00000073060	SCARB1	protein_coding	CDS.DOM	D4.event1753.2	Known-Coding	9.89e-14	4.63e-11	0.254264	0.0450409	3.16, 2.45, 1.73, 1.41, 1	21.35, 16.25, 15.87, 15.81, 13.49, 13.08	51.16, 50.91, 45.16, 41.73, 36.51	76.39, 68.51, 63.36, 60.18, 57.71, 57.32
ir.D4.event1753	12	-	124778586	124786503	D4.event1753.1,D4.event1753.2,D4.event1753.3,D4.event1753.4	124786357^,124786357^124782811-124782683^,124786107^,124782683^	1^,1^3-4^,2^,4^	4	ENSG00000073060	SCARB1	protein_coding	CDS.DOM	D4.event1753.4	PTC_50_All	9.89e-14	0.0292	0.236412	0.132674	7.75, 6.71, 6, 5.1, 3.16	17.66, 16.58, 15.1, 14.49, 14.07, 11.22	51.16, 50.91, 45.16, 41.73, 36.51	76.39, 68.51, 63.36, 60.18, 57.71, 57.32
D2.event14336	6	+	142438364	142443337	D2.event14336.1,D2.event14336.2	,142440908-142440953^	,1-2^	2	ENSG00000112414	GPR126	protein_coding	CDS.DOM	D2.event14336.1	Known-Coding	8.69e-13	0	0.649824	0.85872	202.67, 181.67, 178.33, 174.33, 164.67	51.33, 49.33, 44, 35.33, 35, 25	236.16, 211.82, 208.35, 204.79, 188.55	75.49, 70.38, 61.86, 60.5, 59.49, 41.43
D2.event14336	6	+	142438364	142443337	D2.event14336.1,D2.event14336.2	,142440908-142440953^	,1-2^	2	ENSG00000112414	GPR126	protein_coding	CDS.DOM	D2.event14336.2	Known-Coding	8.69e-13	0	0.350176	0.14128	34.02, 33.49, 30.15, 26.46, 23.88	26.53, 25.5, 24.16, 21.05, 16.43, 15.49	236.16, 211.82, 208.35, 204.79, 188.55	75.49, 70.38, 61.86, 60.5, 59.49, 41.43
D2.event10534	20	+	2655934	2656401	D2.event10534.1,D2.event10534.2	2656034^,2656214^	1^,2^	2	ENSG00000101361	NOP56	protein_coding	CDS.DOM	D2.event10534.1	Known-Coding	9.94e-13	0	0.44723	0.578546	309.5, 300, 296, 276, 272	314, 295.5, 294, 286, 262.5, 238	560, 533, 511, 460, 452	734, 688, 610, 610, 605, 536
D2.event10534	20	+	2655934	2656401	D2.event10534.1,D2.event10534.2	2656034^,2656214^	1^,2^	2	ENSG00000101361	NOP56	protein_coding	CDS.DOM	D2.event10534.2	PTC_50_All	9.94e-13	0	0.55277	0.421454	264, 233, 201.5, 184, 180	420, 394, 342.5, 324, 314.5, 298	560, 533, 511, 460, 452	734, 688, 610, 610, 605, 536
D2.event2073	10	+	127008804	127012374	D2.event2073.1,D2.event2073.2	127012232-,127012295-	1-,2-	2	ENSG00000150760	DOCK1	protein_coding	CDS.DOM	D2.event2073.1	Known-Coding	1.14e-12	0	0.224456	0.457545	68, 61, 56, 52, 44	24, 21, 19, 18.5, 17, 13	142, 130, 122, 119, 101	96, 88, 81.5, 81, 79, 76
D2.event2073	10	+	127008804	127012374	D2.event2073.1,D2.event2073.2	127012232-,127012295-	1-,2-	2	ENSG00000150760	DOCK1	protein_coding	CDS.DOM	D2.event2073.2	Known-Coding	1.14e-12	0	0.775544	0.542455	74, 74, 67, 61, 57	77, 66, 64, 63, 60, 59	142, 130, 122, 119, 101	96, 88, 81.5, 81, 79, 76
ir.D2.event4558	3	+	41239134	41239736	D2.event4558.1,D2.event4558.2	,41239354^41239660-	,1^2-	2	ENSG00000168036	CTNNB1	protein_coding	UTR-3	D2.event4558.1	UTR-3	1.84e-12	0	0.497861	0.606387	500, 485, 483, 450, 401	484, 434, 379, 364, 354, 336	859, 821, 758, 733, 656	919, 852, 788.5, 777, 698, 684
ir.D2.event4558	3	+	41239134	41239736	D2.event4558.1,D2.event4558.2	,41239354^41239660-	,1^2-	2	ENSG00000168036	CTNNB1	protein_coding	UTR-3	D2.event4558.2	UTR-3	1.84e-12	0	0.502139	0.393613	359, 336, 283, 275, 255	435, 424.5, 418, 398, 362, 330	859, 821, 758, 733, 656	919, 852, 788.5, 777, 698, 684
D2.event12674	4	+	55883928	55890223	D2.event12674.1,D2.event12674.2	,55888888-55888932^	,1-2^	2	ENSG00000090989	EXOC1	protein_coding	CDS.DOM	D2.event12674.1	Known-Coding	1.65e-11	0	0.352488	0.69324	42, 42, 42, 39, 38	19, 18, 13, 12, 11, 11	60.49, 59.97, 58.43, 57.49, 56.32	47.5, 45, 41.74, 41.4, 33.35, 29.49
D2.event12674	4	+	55883928	55890223	D2.event12674.1,D2.event12674.2	,55888888-55888932^	,1-2^	2	ENSG00000090989	EXOC1	protein_coding	CDS.DOM	D2.event12674.2	Known-Coding	1.65e-11	0	0.647512	0.30676	22.49, 17.97, 17.32, 16.43, 15.49	30.74, 30.4, 29.5, 26, 20.35, 17.49	60.49, 59.97, 58.43, 57.49, 56.32	47.5, 45, 41.74, 41.4, 33.35, 29.49
D2.event4434	12	-	124778586	124786357	D2.event4434.1,D2.event4434.2	,124782811-124782683^	,1-2^	2	ENSG00000073060	SCARB1	protein_coding	CDS.DOM	D2.event4434.1	Known-Coding	1.82e-11	0	0.666506	0.947129	40, 39, 38, 32, 29	43, 33, 32, 31, 28, 25	42.45, 41.16, 40, 33.73, 30.41	58.81, 49.35, 48.87, 45.49, 44.08, 41.25
D2.event4434	12	-	124778586	124786357	D2.event4434.1,D2.event4434.2	,124782811-124782683^	,1-2^	2	ENSG00000073060	SCARB1	protein_coding	CDS.DOM	D2.event4434.2	Known-Coding	1.82e-11	0	0.333494	0.0528705	3.16, 2.45, 1.73, 1.41, 1	21.35, 16.25, 15.87, 15.81, 13.49, 13.08	42.45, 41.16, 40, 33.73, 30.41	58.81, 49.35, 48.87, 45.49, 44.08, 41.25
D4.event3285	11	-	85959060	85981129	D4.event3285.1,D4.event3285.2,D4.event3285.3,D4.event3285.4	,85978093-85978070^85976682-85976623^85974812-85974708^,85976682-85976623^85974812-85974708^,85974812-85974708^	,1-2^3-4^5-6^,3-4^5-6^,5-6^	4	ENSG00000073921	PICALM	protein_coding	CDS	D4.event3285.2	Known-Coding	4.3e-11	1.08e-11	0.243423	0.134059	48.61, 45.4, 40.78, 34.21, 32.6	84.62, 57.66, 54.24, 51.77, 51.63, 50.99	327.73, 320.2, 304.21, 287.34, 264.65	292.15, 241.52, 240.57, 233.02, 226.72, 206.28
D4.event3285	11	-	85959060	85981129	D4.event3285.1,D4.event3285.2,D4.event3285.3,D4.event3285.4	,85978093-85978070^85976682-85976623^85974812-85974708^,85976682-85976623^85974812-85974708^,85974812-85974708^	,1-2^3-4^5-6^,3-4^5-6^,5-6^	4	ENSG00000073921	PICALM	protein_coding	CDS	D4.event3285.4	Known-Coding	4.3e-11	6.7e-05	0.191621	0.268562	93.72, 84.85, 83.9, 71.24, 70.21	53.03, 48.93, 46.65, 44.36, 43.58, 39.25	327.73, 320.2, 304.21, 287.34, 264.65	292.15, 241.52, 240.57, 233.02, 226.72, 206.28
D4.event3285	11	-	85959060	85981129	D4.event3285.1,D4.event3285.2,D4.event3285.3,D4.event3285.4	,85978093-85978070^85976682-85976623^85974812-85974708^,85976682-85976623^85974812-85974708^,85974812-85974708^	,1-2^3-4^5-6^,3-4^5-6^,5-6^	4	ENSG00000073921	PICALM	protein_coding	CDS	D4.event3285.3	Known-Coding	4.3e-11	1	0.514858	0.546853	187.48, 176.88, 155.35, 154.7, 148.2	146.5, 126.97, 125.82, 120.51, 116.71, 105.04	327.73, 320.2, 304.21, 287.34, 264.65	292.15, 241.52, 240.57, 233.02, 226.72, 206.28
D4.event3285	11	-	85959060	85981129	D4.event3285.1,D4.event3285.2,D4.event3285.3,D4.event3285.4	,85978093-85978070^85976682-85976623^85974812-85974708^,85976682-85976623^85974812-85974708^,85974812-85974708^	,1-2^3-4^5-6^,3-4^5-6^,5-6^	4	ENSG00000073921	PICALM	protein_coding	CDS	D4.event3285.1	Known-Coding	4.3e-11	1	0.0500975	0.0505263	21, 17, 17, 11, 10	15, 15, 12, 11, 11, 8	327.73, 320.2, 304.21, 287.34, 264.65	292.15, 241.52, 240.57, 233.02, 226.72, 206.28
D2.event2143	10	-	29524715	29529705	D2.event2143.1,D2.event2143.2	,29527056-29526961^	,1-2^	2	ENSG00000197321	SVIL	protein_coding	CDS	D2.event2143.2	Known-Coding	7.82e-11	0	0.0844308	0.332048	54.39, 47.43, 41.95, 39.24, 36.65	5.92, 4, 3, 2, 1.41, 1	150.39, 138.24, 135.43, 123.95, 113.65	39.92, 38.41, 37, 33, 30, 27
D2.event2143	10	-	29524715	29529705	D2.event2143.1,D2.event2143.2	,29527056-29526961^	,1-2^	2	ENSG00000197321	SVIL	protein_coding	CDS	D2.event2143.1	Known-Coding	7.82e-11	0	0.915569	0.667952	99, 96, 88, 82, 77	37, 34, 33, 30, 28, 26	150.39, 138.24, 135.43, 123.95, 113.65	39.92, 38.41, 37, 33, 30, 27
ir.D5.event3061	17	-	76089175	76094414	D5.event3061.2,D5.event3061.3,D5.event3061.4,D5.event3061.5	76091235-76091143^76090397-,76091235-76091143^76090397-76090329^76089320-,76091235-76091143^76089320-,76089320-	1-2^3-,1-2^3-4^5-,1-2^5-,5-	4	ENSG00000182473	EXOC7	protein_coding	CDS.DOM	D5.event3061.5	Known-Coding	8.33e-11	4.49e-13	0.617838	0.447605	91, 86, 86, 67, 64	152, 121.5, 119.5, 117, 115.5, 110	193.58, 188.05, 186.63, 156.88, 155.1	222.77, 211.25, 202.16, 189.59, 186.83, 177.84
ir.D5.event3061	17	-	76089175	76094414	D5.event3061.2,D5.event3061.3,D5.event3061.4,D5.event3061.5	76091235-76091143^76090397-,76091235-76091143^76090397-76090329^76089320-,76091235-76091143^76089320-,76089320-	1-2^3-,1-2^3-4^5-,1-2^5-,5-	4	ENSG00000182473	EXOC7	protein_coding	CDS.DOM	D5.event3061.3	Known-Coding	8.33e-11	0.000572659	0.124198	0.193424	39.51, 35.58, 32.48, 31.61, 31.08	28.67, 28.28, 25.4, 24.92, 20.71, 19.87	193.58, 188.05, 186.63, 156.88, 155.1	222.77, 211.25, 202.16, 189.59, 186.83, 177.84
ir.D5.event3061	17	-	76089175	76094414	D5.event3061.2,D5.event3061.3,D5.event3061.4,D5.event3061.5	76091235-76091143^76090397-,76091235-76091143^76090397-76090329^76089320-,76091235-76091143^76089320-,76089320-	1-2^3-,1-2^3-4^5-,1-2^5-,5-	4	ENSG00000182473	EXOC7	protein_coding	CDS.DOM	D5.event3061.4	Known-Coding	8.33e-11	0.0280637	0.171861	0.231039	43.83, 43.47, 41.62, 39.12, 35.33	41.2, 37.79, 36.12, 32.76, 28.5, 28.22	193.58, 188.05, 186.63, 156.88, 155.1	222.77, 211.25, 202.16, 189.59, 186.83, 177.84
ir.D5.event3061	17	-	76089175	76094414	D5.event3061.2,D5.event3061.3,D5.event3061.4,D5.event3061.5	76091235-76091143^76090397-,76091235-76091143^76090397-76090329^76089320-,76091235-76091143^76089320-,76089320-	1-2^3-,1-2^3-4^5-,1-2^5-,5-	4	ENSG00000182473	EXOC7	protein_coding	CDS.DOM	D5.event3061.2	PTC_50_All	8.33e-11	0.0355	0.086103	0.127932	24.24, 23.43, 22.5, 21.28, 21.16	19.88, 18.26, 17.3, 16.41, 16.4, 14.25	193.58, 188.05, 186.63, 156.88, 155.1	222.77, 211.25, 202.16, 189.59, 186.83, 177.84
ir.D3.event5193	5	+	83512103	83537007	D3.event5193.1,D3.event5193.2,D3.event5193.3	83512396^,83512396^83519349-83522309^,83522309^	1^,1^2-3^,3^	3	ENSG00000038427	VCAN	protein_coding	CDS.DOM	D3.event5193.1	Known-Coding	8.33e-11	3.32e-12	0.677284	0.565163	192, 174.5, 173.5, 167.5, 159	478.5, 450.5, 412, 392, 383, 367	328.61, 313.18, 300.08, 295.92, 295.17	692.84, 640.32, 638.52, 569.48, 564.77, 559.73
ir.D3.event5193	5	+	83512103	83537007	D3.event5193.1,D3.event5193.2,D3.event5193.3	83512396^,83512396^83519349-83522309^,83522309^	1^,1^2-3^,3^	3	ENSG00000038427	VCAN	protein_coding	CDS.DOM	D3.event5193.2	Known-Coding	8.33e-11	2.54e-05	0.238637	0.30586	96.87, 95.92, 95.8, 94.5, 85.75	170.73, 155.32, 152.78, 141.86, 127.35, 126.72	328.61, 313.18, 300.08, 295.92, 295.17	692.84, 640.32, 638.52, 569.48, 564.77, 559.73
ir.D3.event5193	5	+	83512103	83537007	D3.event5193.1,D3.event5193.2,D3.event5193.3	83512396^,83512396^83519349-83522309^,83522309^	1^,1^2-3^,3^	3	ENSG00000038427	VCAN	protein_coding	CDS.DOM	D3.event5193.3	PTC_50_All	8.33e-11	4.83e-05	0.0840795	0.128977	41.81, 41.12, 40.69, 38.08, 35.92	59.02, 55.79, 49.7, 49.38, 47.96, 46.05	328.61, 313.18, 300.08, 295.92, 295.17	692.84, 640.32, 638.52, 569.48, 564.77, 559.73
ir.D3.event6597	X	+	154399803	154400702	D3.event6597.1,D3.event6597.2,D3.event6597.3	154399941^,154399941^154400464-154400626^,154400626^	1^,1^2-3^,3^	3	ENSG00000147403	RPL10	protein_coding	CDS.DOM	D3.event6597.1	Known-Coding	1.03e-10	4.64e-10	0.00933704	0.020224	75, 68, 63, 57.5, 46	28, 28, 25, 23, 22, 22	3507.41, 3185.82, 3060.39, 2865.59, 2699.71	2951.58, 2865.13, 2748.65, 2589.41, 2489.43, 2338.65
ir.D3.event6597	X	+	154399803	154400702	D3.event6597.1,D3.event6597.2,D3.event6597.3	154399941^,154399941^154400464-154400626^,154400626^	1^,1^2-3^,3^	3	ENSG00000147403	RPL10	protein_coding	CDS.DOM	D3.event6597.3	PTC_50_All	1.03e-10	0.00357	0.11494	0.0991859	346.58, 314.11, 301.53, 281.82, 274.12	379.51, 325.27, 312.54, 293.64, 283.21, 245.1	3507.41, 3185.82, 3060.39, 2865.59, 2699.71	2951.58, 2865.13, 2748.65, 2589.41, 2489.43, 2338.65
ir.D3.event6597	X	+	154399803	154400702	D3.event6597.1,D3.event6597.2,D3.event6597.3	154399941^,154399941^154400464-154400626^,154400626^	1^,1^2-3^,3^	3	ENSG00000147403	RPL10	protein_coding	CDS.DOM	D3.event6597.2	Known-Coding	1.03e-10	1	0.875723	0.88059	3085.83, 2821.29, 2688.78, 2515.77, 2379.59	2549.07, 2524.59, 2401.38, 2281.2, 2167.79, 2071.55	3507.41, 3185.82, 3060.39, 2865.59, 2699.71	2951.58, 2865.13, 2748.65, 2589.41, 2489.43, 2338.65
D2.event9326	2	+	42256630	42263178	D2.event9326.1,D2.event9326.2	,42261121-42261294^	,1-2^	2	ENSG00000143924	EML4	protein_coding	CDS	D2.event9326.1	Known-Coding	1.16e-10	0	0.281355	0.139468	27.5, 24.5, 23.5, 20.5, 17.5	60.5, 59, 57, 55, 50.5, 37.5	173.02, 167.84, 167.25, 161.46, 145.05	207.64, 199.03, 196.04, 192.05, 182.01, 158.72
D2.event9326	2	+	42256630	42263178	D2.event9326.1,D2.event9326.2	,42261121-42261294^	,1-2^	2	ENSG00000143924	EML4	protein_coding	CDS	D2.event9326.2	Known-Coding	1.16e-10	0	0.718645	0.860532	147.34, 145.52, 143.75, 136.96, 127.55	152.64, 145.54, 140.03, 131.55, 125.01, 121.22	173.02, 167.84, 167.25, 161.46, 145.05	207.64, 199.03, 196.04, 192.05, 182.01, 158.72
D2.event13271	5	+	34812208	34814583	D2.event13271.1,D2.event13271.2	,34813574-34813660^	,1-2^	2	ENSG00000039560	RAI14	protein_coding	CDS	D2.event13271.2	Known-Coding	1.82e-10	0	0.574443	0.281073	25.79, 21.24, 20.98, 19.12, 18.97	57.15, 37.6, 34.47, 30.52, 28.84, 28.12	89.29, 86.98, 74.12, 68.74, 60.47	82.15, 69.47, 62.6, 58.52, 55.62, 47.84
D2.event13271	5	+	34812208	34814583	D2.event13271.1,D2.event13271.2	,34813574-34813660^	,1-2^	2	ENSG00000039560	RAI14	protein_coding	CDS	D2.event13271.1	Known-Coding	1.82e-10	0	0.425557	0.718927	66, 63.5, 55, 47.5, 41.5	35, 28, 27.5, 25, 25, 19	89.29, 86.98, 74.12, 68.74, 60.47	82.15, 69.47, 62.6, 58.52, 55.62, 47.84
ir.D3.event63	1	+	39435558	39437777	D3.event63.1,D3.event63.2,D3.event63.3	39435761^,39435761^39436482-39436490^,39436490^	1^,1^2-3^,3^	3	ENSG00000127603	MACF1	protein_coding	CDS.DOM	D3.event63.1	Known-Coding	2.16e-10	8.4e-12	0.0302731	0.194958	14, 12, 10, 9, 8	6, 5, 2, 1, 1, 1	59.17, 55.64, 53.45, 52.75, 51.12	96.58, 93.49, 92.29, 90.11, 76.17, 74.09
ir.D3.event63	1	+	39435558	39437777	D3.event63.1,D3.event63.2,D3.event63.3	39435761^,39435761^39436482-39436490^,39436490^	1^,1^2-3^,3^	3	ENSG00000127603	MACF1	protein_coding	CDS.DOM	D3.event63.2	Known-Coding	2.16e-10	2.26e-05	0.774415	0.600176	39.95, 33, 30.5, 30.5, 29.5	79.99, 72.97, 68.5, 66, 59.45, 57.99	59.17, 55.64, 53.45, 52.75, 51.12	96.58, 93.49, 92.29, 90.11, 76.17, 74.09
ir.D3.event63	1	+	39435558	39437777	D3.event63.1,D3.event63.2,D3.event63.3	39435761^,39435761^39436482-39436490^,39436490^	1^,1^2-3^,3^	3	ENSG00000127603	MACF1	protein_coding	CDS.DOM	D3.event63.3	PTC_50_All	2.16e-10	1	0.195312	0.204866	14.25, 11.22, 11.14, 10.95, 8.12	21.49, 17.32, 17.18, 16.61, 15.59, 13.64	59.17, 55.64, 53.45, 52.75, 51.12	96.58, 93.49, 92.29, 90.11, 76.17, 74.09
D2.event14915	7	+	74189918	74194741	D2.event14915.1,D2.event14915.2	,74190247-74190306^	,1-2^	2	ENSG00000106682	EIF4H	protein_coding	CDS	D2.event14915.1	Known-Coding	3.07e-10	0	0.761528	0.654592	385.5, 379, 355, 347.5, 321	428, 399.5, 396.5, 359, 355, 348.5	601.98, 564.96, 563.68, 507.99, 494.5	545.45, 525.5, 520.17, 480.84, 466.7, 462.67
D2.event14915	7	+	74189918	74194741	D2.event14915.1,D2.event14915.2	,74190247-74190306^	,1-2^	2	ENSG00000106682	EIF4H	protein_coding	CDS	D2.event14915.2	Known-Coding	3.07e-10	0	0.238472	0.345408	216.48, 216.18, 185.96, 173.5, 152.99	132.34, 126, 123.67, 117.45, 107.7, 107.67	601.98, 564.96, 563.68, 507.99, 494.5	545.45, 525.5, 520.17, 480.84, 466.7, 462.67
ir.D4.event1987	14	-	23065966	23069617	D4.event1987.1,D4.event1987.2,D4.event1987.3,D4.event1987.4	,23069476^23068671-23067314^23066008-,23069476^23066008-,23067314^23066008-	,1^2-3^4-,1^4-,3^4-	4	ENSG00000100813	ACIN1	protein_coding	CDS	D4.event1987.3	Known-Coding	4.2e-10	5.94e-12	0.78988	0.67929	238, 185, 184, 178, 175	306, 300, 282, 277, 276, 250	340.77, 282.11, 269.9, 266.07, 254.39	394.24, 384.35, 355.11, 347.75, 342.68, 316.7
ir.D4.event1987	14	-	23065966	23069617	D4.event1987.1,D4.event1987.2,D4.event1987.3,D4.event1987.4	,23069476^23068671-23067314^23066008-,23069476^23066008-,23067314^23066008-	,1^2-3^4-,1^4-,3^4-	4	ENSG00000100813	ACIN1	protein_coding	CDS	D4.event1987.4	PTC_50_All	4.2e-10	6.54e-06	0.0837618	0.139163	44.16, 44.12, 38.46, 35.29, 34.64	36.06, 35.33, 31.81, 26.83, 25.1, 24.19	340.77, 282.11, 269.9, 266.07, 254.39	394.24, 384.35, 355.11, 347.75, 342.68, 316.7
ir.D4.event1987	14	-	23065966	23069617	D4.event1987.1,D4.event1987.2,D4.event1987.3,D4.event1987.4	,23069476^23068671-23067314^23066008-,23069476^23066008-,23067314^23066008-	,1^2-3^4-,1^4-,3^4-	4	ENSG00000100813	ACIN1	protein_coding	CDS	D4.event1987.2	PTC_50_All	4.2e-10	0.0527286	0.0311002	0.0524256	18.65, 18.37, 15.2, 11.87, 10	14.07, 12.96, 12.49, 10.82, 10.58, 5.66	340.77, 282.11, 269.9, 266.07, 254.39	394.24, 384.35, 355.11, 347.75, 342.68, 316.7
ir.D4.event1987	14	-	23065966	23069617	D4.event1987.1,D4.event1987.2,D4.event1987.3,D4.event1987.4	,23069476^23068671-23067314^23066008-,23069476^23066008-,23067314^23066008-	,1^2-3^4-,1^4-,3^4-	4	ENSG00000100813	ACIN1	protein_coding	CDS	D4.event1987.1	PTC_50_All	4.2e-10	0.0527286	0.0952575	0.129122	43.45, 37.79, 34.91, 34.58, 31.75	39.69, 36.06, 34.21, 33.23, 30.74, 30	340.77, 282.11, 269.9, 266.07, 254.39	394.24, 384.35, 355.11, 347.75, 342.68, 316.7
D4.event13034	4	-	82857764	82863318	D4.event13034.1,D4.event13034.2,D4.event13034.3,D4.event13034.4	,82862572-82862534^,82862572-82862534^82861708-82861631^,82861708-82861631^	,1-2^,1-2^3-4^,3-4^	4	ENSG00000138674	SEC31A	protein_coding	CDS	D4.event13034.1	Known-Coding	4.73e-10	4.09e-10	0.226319	0.363249	82, 74, 73, 67, 59	69, 52, 49, 45, 40, 33	208.45, 207.36, 199.11, 183.56, 178.58	256.01, 242.12, 218.21, 194.54, 192.38, 168.06
D4.event13034	4	-	82857764	82863318	D4.event13034.1,D4.event13034.2,D4.event13034.3,D4.event13034.4	,82862572-82862534^,82862572-82862534^82861708-82861631^,82861708-82861631^	,1-2^,1-2^3-4^,3-4^	4	ENSG00000138674	SEC31A	protein_coding	CDS	D4.event13034.3	Known-Coding	4.73e-10	2.29e-08	0.526931	0.390092	79.95, 77.99, 76.46, 74.82, 71.85	130.48, 120.94, 112.82, 105.96, 104.25, 95.08	208.45, 207.36, 199.11, 183.56, 178.58	256.01, 242.12, 218.21, 194.54, 192.38, 168.06
D4.event13034	4	-	82857764	82863318	D4.event13034.1,D4.event13034.2,D4.event13034.3,D4.event13034.4	,82862572-82862534^,82862572-82862534^82861708-82861631^,82861708-82861631^	,1-2^,1-2^3-4^,3-4^	4	ENSG00000138674	SEC31A	protein_coding	CDS	D4.event13034.4	Known-Coding	4.73e-10	1	0.0778472	0.0592202	12.67, 11.75, 11.22, 11.14, 10.86	26.27, 22.02, 15.1, 14.07, 12.73, 9	208.45, 207.36, 199.11, 183.56, 178.58	256.01, 242.12, 218.21, 194.54, 192.38, 168.06
D4.event13034	4	-	82857764	82863318	D4.event13034.1,D4.event13034.2,D4.event13034.3,D4.event13034.4	,82862572-82862534^,82862572-82862534^82861708-82861631^,82861708-82861631^	,1-2^,1-2^3-4^,3-4^	4	ENSG00000138674	SEC31A	protein_coding	CDS	D4.event13034.2	Known-Coding	4.73e-10	1	0.168903	0.187439	46.96, 41.02, 36.51, 35.62, 23.24	45.57, 39.8, 38.37, 33.48, 30.98, 26.4	208.45, 207.36, 199.11, 183.56, 178.58	256.01, 242.12, 218.21, 194.54, 192.38, 168.06
D2.event226	1	+	39372596	39379203	D2.event226.1,D2.event226.2	,39378461-39378523^	,1-2^	2	ENSG00000127603	MACF1	protein_coding	CDS	D2.event226.1	Known-Coding	5.24e-10	0	0.0639174	0.378724	13, 12, 11, 9, 5	10, 5, 4, 4, 2, 1	32.21, 28.44, 25.27, 23.76, 22.27	74.74, 73.48, 68.45, 67.99, 61.13, 58.48
D2.event226	1	+	39372596	39379203	D2.event226.1,D2.event226.2	,39378461-39378523^	,1-2^	2	ENSG00000127603	MACF1	protein_coding	CDS	D2.event226.2	Known-Coding	5.24e-10	0	0.936083	0.621276	19.21, 18.76, 17.44, 13.27, 13.27	71.48, 69.74, 64.45, 57.99, 57.48, 57.13	32.21, 28.44, 25.27, 23.76, 22.27	74.74, 73.48, 68.45, 67.99, 61.13, 58.48
ir.D2.event6560	X	+	71544567	71548023	D2.event6560.1,D2.event6560.2	,71544635^71547907-	,1^2-	2	ENSG00000147162	OGT	protein_coding	CDS.DOM	D2.event6560.2	Known-Coding	5.47e-10	0	0.771123	0.890739	208, 203, 200, 196, 181	135, 133, 113, 112, 107, 98	229, 228, 224.5, 223, 204.5	177, 167, 145, 145, 138, 133
ir.D2.event6560	X	+	71544567	71548023	D2.event6560.1,D2.event6560.2	,71544635^71547907-	,1^2-	2	ENSG00000147162	OGT	protein_coding	CDS.DOM	D2.event6560.1	PTC_50_All	5.47e-10	0	0.228877	0.109261	27, 26, 24.5, 23.5, 20	42, 35, 34, 33, 32, 31	229, 228, 224.5, 223, 204.5	177, 167, 145, 145, 138, 133
D2.event15665	8	+	31088965	31090834	D2.event15665.1,D2.event15665.2	,31090465-31090532^	,1-2^	2	ENSG00000165392	WRN	protein_coding	CDS.DOM	D2.event15665.2	Known-Coding	6.29e-10	0	0.984051	0.771423	87.91, 86.49, 70.29, 68.27, 60.93	46.48, 42.81, 34.06, 31.94, 28.14, 25.5	106.91, 102.49, 101.29, 90.27, 82.93	46.48, 43.81, 34.06, 31.94, 28.14, 27.5
D2.event15665	8	+	31088965	31090834	D2.event15665.1,D2.event15665.2	,31090465-31090532^	,1-2^	2	ENSG00000165392	WRN	protein_coding	CDS.DOM	D2.event15665.1	Known-Coding	6.29e-10	0	0.0159494	0.228577	31, 22, 22, 19, 16	2, 1, 0, 0, 0, 0	106.91, 102.49, 101.29, 90.27, 82.93	46.48, 43.81, 34.06, 31.94, 28.14, 27.5
D2.event12960	4	-	40934699	40944865	D2.event12960.1,D2.event12960.2	,40935139-40935077^	,1-2^	2	ENSG00000163697	APBB2	protein_coding	CDS	D2.event12960.1	Known-Coding	7.82e-10	0	0.606672	0.926124	48, 41, 35, 33, 33	20, 19, 17, 16, 13, 10	50.83, 44.16, 37.45, 36.46, 35.65	28.77, 27.96, 27.58, 26.49, 25.93, 19.93
D2.event12960	4	-	40934699	40944865	D2.event12960.1,D2.event12960.2	,40935139-40935077^	,1-2^	2	ENSG00000163697	APBB2	protein_coding	CDS	D2.event12960.2	Known-Coding	7.82e-10	0	0.393328	0.0738757	3.46, 3.16, 2.83, 2.65, 2.45	16.49, 11.96, 10.58, 8.77, 6.93, 6.93	50.83, 44.16, 37.45, 36.46, 35.65	28.77, 27.96, 27.58, 26.49, 25.93, 19.93
D4.event7830	17	-	76089320	76094414	D4.event7830.1,D4.event7830.2,D4.event7830.4	,76091235-76091143^,76091235-76091143^76090397-76090329^	,1-2^,1-2^3-4^	3	ENSG00000182473	EXOC7	protein_coding	CDS	D4.event7830.1	Known-Coding	8.55e-10	1.99e-11	0.677667	0.513475	91, 86, 86, 67, 64	152, 121.5, 119.5, 117, 115.5, 110	169.34, 165.19, 163.2, 135.6, 133.94	205.18, 191.37, 183.06, 172.86, 169.24, 163.59
D4.event7830	17	-	76089320	76094414	D4.event7830.1,D4.event7830.2,D4.event7830.4	,76091235-76091143^,76091235-76091143^76090397-76090329^	,1-2^,1-2^3-4^	3	ENSG00000182473	EXOC7	protein_coding	CDS	D4.event7830.4	Known-Coding	8.55e-10	1.93e-05	0.134587	0.221451	39.51, 35.58, 32.48, 31.61, 30.72	28.67, 28.28, 25.07, 23.74, 20.42, 19.87	169.34, 165.19, 163.2, 135.6, 133.94	205.18, 191.37, 183.06, 172.86, 169.24, 163.59
D4.event7830	17	-	76089320	76094414	D4.event7830.1,D4.event7830.2,D4.event7830.4	,76091235-76091143^,76091235-76091143^76090397-76090329^	,1-2^,1-2^3-4^	3	ENSG00000182473	EXOC7	protein_coding	CDS	D4.event7830.2	Known-Coding	8.55e-10	0.00130082	0.187746	0.265074	43.83, 43.47, 41.62, 39.12, 35.33	41.2, 37.79, 35.28, 32.76, 28.5, 28.22	169.34, 165.19, 163.2, 135.6, 133.94	205.18, 191.37, 183.06, 172.86, 169.24, 163.59
D2.event16611	9	-	83968197	83970162	D2.event16611.1,D2.event16611.2	83969440-,83969380-	1-,2-	2	ENSG00000165119	HNRNPK	protein_coding	CDS.DOM	D2.event16611.1	Known-Coding	1.68e-09	0	0.637679	0.701819	1214, 1190, 1178.5, 1081.5, 963	1002.5, 987.5, 924, 917, 850, 796	1720, 1700, 1656.5, 1579, 1362.5	1569, 1539.5, 1451.5, 1409.5, 1356.5, 1261.5
D2.event16611	9	-	83968197	83970162	D2.event16611.1,D2.event16611.2	83969440-,83969380-	1-,2-	2	ENSG00000165119	HNRNPK	protein_coding	CDS.DOM	D2.event16611.2	Known-Coding	1.68e-09	0	0.362321	0.298181	541.5, 497.5, 486, 466.5, 399.5	581.5, 537, 534.5, 506.5, 485.5, 465.5	1720, 1700, 1656.5, 1579, 1362.5	1569, 1539.5, 1451.5, 1409.5, 1356.5, 1261.5
D2.event16612	9	-	83968084	83970162	D2.event16612.1,D2.event16612.2	83969440-,83969380-	1-,2-	2	ENSG00000165119	HNRNPK	protein_coding	CDS.DOM	D2.event16612.1	Known-Coding	1.68e-09	0	0.637678	0.701819	1214, 1190, 1178.5, 1081.5, 963	1002.5, 987.5, 924, 917, 850, 796	1720, 1700, 1656.5, 1579, 1362.5	1569, 1539.5, 1451.5, 1409.5, 1356.5, 1261.5
D2.event16612	9	-	83968084	83970162	D2.event16612.1,D2.event16612.2	83969440-,83969380-	1-,2-	2	ENSG00000165119	HNRNPK	protein_coding	CDS.DOM	D2.event16612.2	Known-Coding	1.68e-09	0	0.362322	0.298181	541.5, 497.5, 486, 466.5, 399.5	581.5, 537, 534.5, 506.5, 485.5, 465.5	1720, 1700, 1656.5, 1579, 1362.5	1569, 1539.5, 1451.5, 1409.5, 1356.5, 1261.5
ir.D4.event2792	17	+	50750501	50752200	D4.event2792.1,D4.event2792.2,D4.event2792.3,D4.event2792.4	50750641^50750747-50750852^,50750641^50750747-50750852^50751297-50751362^,50750694^,50751362^	1^3-4^,1^3-4^5-6^,2^,6^	4	ENSG00000108848	LUC7L3	protein_coding	CDS	D4.event2792.3	Known-Coding	1.92e-09	1.92e-10	0.58394	0.746356	126, 125, 121, 116.5, 106	113, 108, 105.5, 97, 83, 83	165.8, 159.81, 159.12, 158.3, 153.61	200.7, 200.04, 172.96, 169.84, 136.88, 129.29
ir.D4.event2792	17	+	50750501	50752200	D4.event2792.1,D4.event2792.2,D4.event2792.3,D4.event2792.4	50750641^50750747-50750852^,50750641^50750747-50750852^50751297-50751362^,50750694^,50751362^	1^3-4^,1^3-4^5-6^,2^,6^	4	ENSG00000108848	LUC7L3	protein_coding	CDS	D4.event2792.2	Known-Coding	1.92e-09	0.000171288	0.0825177	0.0307258	6.84, 4.93, 4.93, 4.67, 2.92	19.14, 17.53, 15.66, 12.36, 9.97, 8.62	165.8, 159.81, 159.12, 158.3, 153.61	200.7, 200.04, 172.96, 169.84, 136.88, 129.29
ir.D4.event2792	17	+	50750501	50752200	D4.event2792.1,D4.event2792.2,D4.event2792.3,D4.event2792.4	50750641^50750747-50750852^,50750641^50750747-50750852^50751297-50751362^,50750694^,50751362^	1^3-4^,1^3-4^5-6^,2^,6^	4	ENSG00000108848	LUC7L3	protein_coding	CDS	D4.event2792.4	Known-Coding	1.92e-09	0.00185836	0.232078	0.152876	37.78, 25.89, 20.54, 19.7, 18.13	50.37, 49.68, 43.33, 36.39, 29.84, 25.02	165.8, 159.81, 159.12, 158.3, 153.61	200.7, 200.04, 172.96, 169.84, 136.88, 129.29
ir.D4.event2792	17	+	50750501	50752200	D4.event2792.1,D4.event2792.2,D4.event2792.3,D4.event2792.4	50750641^50750747-50750852^,50750641^50750747-50750852^50751297-50751362^,50750694^,50751362^	1^3-4^,1^3-4^5-6^,2^,6^	4	ENSG00000108848	LUC7L3	protein_coding	CDS	D4.event2792.1	Known-Coding	1.92e-09	0.397075	0.101464	0.0700429	15.43, 12.65, 12.25, 10.58, 4.9	23.22, 19.8, 16.97, 15.59, 14.07, 12.65	165.8, 159.81, 159.12, 158.3, 153.61	200.7, 200.04, 172.96, 169.84, 136.88, 129.29
D2.event228	1	+	39435761	39437777	D2.event228.1,D2.event228.2	,39436482-39436490^	,1-2^	2	ENSG00000127603	MACF1	protein_coding	CDS	D2.event228.1	Known-Coding	4.11e-09	0	0.0379212	0.246141	14, 12, 10, 9, 8	6, 5, 2, 1, 1, 1	47.95, 44.5, 43, 42.5, 38.5	80.99, 74.97, 73.5, 72, 59.92, 58.48
D2.event228	1	+	39435761	39437777	D2.event228.1,D2.event228.2	,39436482-39436490^	,1-2^	2	ENSG00000127603	MACF1	protein_coding	CDS	D2.event228.2	Known-Coding	4.11e-09	0	0.962079	0.753859	39.95, 33, 30.5, 30.5, 29.5	79.99, 72.97, 68.5, 66, 58.92, 57.48	47.95, 44.5, 43, 42.5, 38.5	80.99, 74.97, 73.5, 72, 59.92, 58.48
ir.D3.event82	1	+	44776034	44777614	D3.event82.1,D3.event82.2,D3.event82.3	44776140^44776675-44776714^,44776140^44776675-44776774^,44776774^	1^2-3^,1^2-4^,4^	3	ENSG00000142937	RPS8	protein_coding	CDS.DOM	D3.event82.3	PTC_50_All	6.95e-09	8.37e-10	0.0909924	0.0697058	580.12, 496.42, 456.6, 435.86, 410.58	676.39, 626.94, 620.19, 597.28, 551.58, 500.85	7663.66, 6829.61, 6561.05, 6552.97, 6466.3	7065.46, 6820.99, 6629.24, 6527, 6250.17, 5950.15
ir.D3.event82	1	+	44776034	44777614	D3.event82.1,D3.event82.2,D3.event82.3	44776140^44776675-44776714^,44776140^44776675-44776774^,44776774^	1^2-3^,1^2-4^,4^	3	ENSG00000142937	RPS8	protein_coding	CDS.DOM	D3.event82.2	Known-Coding	6.95e-09	1.74e-07	0.81052	0.836526	6418, 5682.61, 5542.95, 5471.42, 5390.49	5763.38, 5521.39, 5351.59, 5246.94, 5095.24, 4829.73	7663.66, 6829.61, 6561.05, 6552.97, 6466.3	7065.46, 6820.99, 6629.24, 6527, 6250.17, 5950.15
ir.D3.event82	1	+	44776034	44777614	D3.event82.1,D3.event82.2,D3.event82.3	44776140^44776675-44776714^,44776140^44776675-44776774^,44776774^	1^2-3^,1^2-4^,4^	3	ENSG00000142937	RPS8	protein_coding	CDS.DOM	D3.event82.1	Known-Coding	6.95e-09	1	0.0984879	0.0937683	665.54, 650.58, 639.95, 624.95, 607.52	704.8, 679.41, 653.12, 619.57, 603.35, 601.26	7663.66, 6829.61, 6561.05, 6552.97, 6466.3	7065.46, 6820.99, 6629.24, 6527, 6250.17, 5950.15
ir.D5.event1033	11	+	85628688	85631687	D5.event1033.1,D5.event1033.2,D5.event1033.3,D5.event1033.4,D5.event1033.5	,85629132-85629262^,85629132-85629262^85631145-85631316^,85629132-85631316^,85631145-85631316^	,1-2^,1-2^3-4^,1-4^,3-4^	5	ENSG00000171204	TMEM126B	protein_coding	CDS	D5.event1033.1	Known-Coding	1.2e-08	8.83e-11	0.331885	0.181404	36, 29, 28, 25, 16	63.5, 61, 55, 48.5, 48, 42.5	158.46, 148.62, 145.22, 144.15, 142.23	171.18, 170.91, 164.69, 161.65, 148.33, 142.91
ir.D5.event1033	11	+	85628688	85631687	D5.event1033.1,D5.event1033.2,D5.event1033.3,D5.event1033.4,D5.event1033.5	,85629132-85629262^,85629132-85629262^85631145-85631316^,85629132-85631316^,85631145-85631316^	,1-2^,1-2^3-4^,1-4^,3-4^	5	ENSG00000171204	TMEM126B	protein_coding	CDS	D5.event1033.5	Known-NMD	1.2e-08	2.96e-05	0.406733	0.528402	86.79, 78.14, 75.65, 75.02, 74.72	78.74, 69.09, 67.93, 60.25, 58.4, 55.92	158.46, 148.62, 145.22, 144.15, 142.23	171.18, 170.91, 164.69, 161.65, 148.33, 142.91
ir.D5.event1033	11	+	85628688	85631687	D5.event1033.1,D5.event1033.2,D5.event1033.3,D5.event1033.4,D5.event1033.5	,85629132-85629262^,85629132-85629262^85631145-85631316^,85629132-85631316^,85631145-85631316^	,1-2^,1-2^3-4^,1-4^,3-4^	5	ENSG00000171204	TMEM126B	protein_coding	CDS	D5.event1033.3	Known-NMD	1.2e-08	1	0.0908336	0.113229	21.18, 17.66, 15.58, 15.46, 13.76	17.12, 15.49, 15.46, 14.55, 13.13, 11.42	158.46, 148.62, 145.22, 144.15, 142.23	171.18, 170.91, 164.69, 161.65, 148.33, 142.91
ir.D5.event1033	11	+	85628688	85631687	D5.event1033.1,D5.event1033.2,D5.event1033.3,D5.event1033.4,D5.event1033.5	,85629132-85629262^,85629132-85629262^85631145-85631316^,85629132-85631316^,85631145-85631316^	,1-2^,1-2^3-4^,1-4^,3-4^	5	ENSG00000171204	TMEM126B	protein_coding	CDS	D5.event1033.4	PTC_50_All	1.2e-08	1	0.12124	0.128595	22.15, 18.78, 18.63, 18.1, 17.33	24.59, 21.57, 18.5, 17.69, 17.53, 16.47	158.46, 148.62, 145.22, 144.15, 142.23	171.18, 170.91, 164.69, 161.65, 148.33, 142.91
ir.D5.event1033	11	+	85628688	85631687	D5.event1033.1,D5.event1033.2,D5.event1033.3,D5.event1033.4,D5.event1033.5	,85629132-85629262^,85629132-85629262^85631145-85631316^,85629132-85631316^,85631145-85631316^	,1-2^,1-2^3-4^,1-4^,3-4^	5	ENSG00000171204	TMEM126B	protein_coding	CDS	D5.event1033.2	Known-NMD	1.2e-08	1	0.0493089	0.04837	9.17, 8.12, 8.12, 5.74, 4.58	11.68, 8.83, 8.12, 6.89, 6.32, 5.48	158.46, 148.62, 145.22, 144.15, 142.23	171.18, 170.91, 164.69, 161.65, 148.33, 142.91
D2.event11916	3	+	172755374	172756983	D2.event11916.1,D2.event11916.2	,172755483-172755575^	,1-2^	2	ENSG00000114346	ECT2	protein_coding	CDS	D2.event11916.1	Known-Coding	1.57e-08	0	0.400141	0.598185	94, 90, 83, 82, 71.5	97, 92, 77, 67, 65, 44	155.45, 147.31, 139.58, 131.83, 128.61	220.49, 212.49, 207.41, 165.95, 147.98, 146.96
D2.event11916	3	+	172755374	172756983	D2.event11916.1,D2.event11916.2	,172755483-172755575^	,1-2^	2	ENSG00000114346	ECT2	protein_coding	CDS	D2.event11916.2	Known-Coding	1.57e-08	0	0.599859	0.401815	65.45, 60.33, 57.58, 53.31, 45.61	143.49, 120.49, 110.41, 102.96, 98.95, 82.98	155.45, 147.31, 139.58, 131.83, 128.61	220.49, 212.49, 207.41, 165.95, 147.98, 146.96
D2.event1281	1	-	68481612	68483950	D2.event1281.1,D2.event1281.2	,68482897-68482046^	,1-2^	2	ENSG00000024526	DEPDC1	protein_coding	CDS.DOM	D2.event1281.2	Known-Coding	2.07e-08	0	0.38704	0.21434	29.7, 28.25, 24.33, 21.75, 19.62	57.55, 55.1, 54.22, 52.82, 44.63, 39.5	136.7, 123.33, 111.25, 105.75, 100.62	162.55, 142.82, 128.1, 125.63, 119.22, 107.5
D2.event1281	1	-	68481612	68483950	D2.event1281.1,D2.event1281.2	,68482897-68482046^	,1-2^	2	ENSG00000024526	DEPDC1	protein_coding	CDS.DOM	D2.event1281.1	Known-Coding	2.07e-08	0	0.61296	0.78566	107, 99, 84, 83, 81	105, 90, 81, 73, 68, 65	136.7, 123.33, 111.25, 105.75, 100.62	162.55, 142.82, 128.1, 125.63, 119.22, 107.5
ir.D2.event679	10	+	11328932	11336671	D2.event679.1,D2.event679.2	,11329097^11338197-	,1^2-	2	ENSG00000095906	CELF2	protein_coding	UTR-3	D2.event679.1	UTR-3	2.48e-08	0	0.0416892	0.217091	3, 2, 1, 1, 1, 0	55, 49, 47, 45, 40	37, 36, 35, 34, 31, 21	290, 210, 209, 195, 188
ir.D2.event679	10	+	11328932	11336671	D2.event679.1,D2.event679.2	,11329097^11338197-	,1^2-	2	ENSG00000095906	CELF2	protein_coding	UTR-3	D2.event679.2	UTR-3	2.48e-08	0	0.958311	0.782909	36, 34, 33, 33, 29, 21	235, 165, 162, 155, 139	37, 36, 35, 34, 31, 21	290, 210, 209, 195, 188
D3.event12307	3	-	98521133	98522849	D3.event12307.1,D3.event12307.2,D3.event12307.3	98521703-98521653^98521442-,98521442-,98521437-	1-2^3-,3-,4-	3	ENSG00000080822	CLDND1	protein_coding	UTR-5	D3.event12307.1	UTR-5	3.22e-08	0	0.257123	0.0574064	4.9, 4, 3.87, 2.45, 2.45	17.29, 14.46, 14.42, 11.62, 11.62, 7.75	81.45, 73, 66.45, 61.9, 52.37	63.62, 56.29, 51.62, 48.46, 46.42, 43.75
D3.event12307	3	-	98521133	98522849	D3.event12307.1,D3.event12307.2,D3.event12307.3	98521703-98521653^98521442-,98521442-,98521437-	1-2^3-,3-,4-	3	ENSG00000080822	CLDND1	protein_coding	UTR-5	D3.event12307.2	Known-Coding	3.22e-08	0	0.742877	0.942594	75, 66, 61, 53, 46.5	52, 39, 36, 35, 32, 30	81.45, 73, 66.45, 61.9, 52.37	63.62, 56.29, 51.62, 48.46, 46.42, 43.75
ir.D5.event2385	16	+	30001040	30005221	D5.event2385.1,D5.event2385.2,D5.event2385.3,D5.event2385.4	,30001212-30001530^30004568-30004657^,30001212-30004657^,30001414-30001530^	,1-3^4-5^,1-5^,2-3^	4	ENSG00000169592	INO80E	protein_coding	CDS	D5.event2385.1	Known-Coding	3.23e-08	6.38e-10	0.456871	0.228057	20, 18, 16, 12, 6	51, 47, 38, 37, 33, 30	81.55, 70.49, 61.64, 59.03, 56.54	111.1, 98.49, 90.78, 83.07, 81.28, 72.22
ir.D5.event2385	16	+	30001040	30005221	D5.event2385.1,D5.event2385.2,D5.event2385.3,D5.event2385.4	,30001212-30001530^30004568-30004657^,30001212-30004657^,30001414-30001530^	,1-3^4-5^,1-5^,2-3^	4	ENSG00000169592	INO80E	protein_coding	CDS	D5.event2385.4	Known-Coding	3.23e-08	1.04e-07	0.483369	0.691948	55.37, 45.37, 42.99, 41.89, 32.65	50.91, 44.27, 43.35, 42.5, 42.5, 26.15	81.55, 70.49, 61.64, 59.03, 56.54	111.1, 98.49, 90.78, 83.07, 81.28, 72.22
ir.D5.event2385	16	+	30001040	30005221	D5.event2385.1,D5.event2385.2,D5.event2385.3,D5.event2385.4	,30001212-30001530^30004568-30004657^,30001212-30004657^,30001414-30001530^	,1-3^4-5^,1-5^,2-3^	4	ENSG00000169592	INO80E	protein_coding	CDS	D5.event2385.3	PTC_50_All	3.23e-08	1	0.0597602	0.0799946	6.18, 5.14, 5.13, 4.6, 4.09	5.63, 5.27, 5.21, 5.05, 4.86, 4.68	81.55, 70.49, 61.64, 59.03, 56.54	111.1, 98.49, 90.78, 83.07, 81.28, 72.22
D2.event3093	11	-	47478877	47482695	D2.event3093.1,D2.event3093.2	47478952-,47478940-	1-,2-	2	ENSG00000149187	CELF1	protein_coding	CDS	D2.event3093.1	Known-Coding	3.42e-08	0	0.419575	0.554287	108, 93, 91.5, 89, 83	117, 117, 114, 110.5, 106, 98	179, 176, 168.5, 162.5, 152	278.5, 273.5, 272, 262, 259, 234
D2.event3093	11	-	47478877	47482695	D2.event3093.1,D2.event3093.2	47478952-,47478940-	1-,2-	2	ENSG00000149187	CELF1	protein_coding	CDS	D2.event3093.2	Known-Coding	3.42e-08	0	0.580425	0.445713	83, 77, 73.5, 71, 69	163, 161.5, 155, 153, 148, 136	179, 176, 168.5, 162.5, 152	278.5, 273.5, 272, 262, 259, 234
ir.D3.event4133	20	+	43458361	43459895	D3.event4133.1,D3.event4133.2,D3.event4133.3	,43458509^43459153-43459420^43459771-,43458509^43459771-	,1^2-3^4-,1^4-	3	ENSG00000124193	SRSF6	protein_coding	CDS.DOM	D3.event4133.3	Known-Coding	3.74e-08	7.53e-10	0.833496	0.728033	234.5, 201, 193, 157, 141	306.5, 270, 259.5, 244, 221, 211	306.46, 276.85, 261.21, 220.59, 206.52	353.52, 320.25, 311.63, 292.89, 270.91, 263.9
ir.D3.event4133	20	+	43458361	43459895	D3.event4133.1,D3.event4133.2,D3.event4133.3	,43458509^43459153-43459420^43459771-,43458509^43459771-	,1^2-3^4-,1^4-	3	ENSG00000124193	SRSF6	protein_coding	CDS.DOM	D3.event4133.1	PTC_50_All	3.74e-08	9.67e-07	0.122507	0.199616	52.99, 52.87, 52.1, 49.48, 45.93	40.47, 39.34, 39.23, 36.18, 34.29, 32.19	306.46, 276.85, 261.21, 220.59, 206.52	353.52, 320.25, 311.63, 292.89, 270.91, 263.9
ir.D3.event4133	20	+	43458361	43459895	D3.event4133.1,D3.event4133.2,D3.event4133.3	,43458509^43459153-43459420^43459771-,43458509^43459771-	,1^2-3^4-,1^4-	3	ENSG00000124193	SRSF6	protein_coding	CDS.DOM	D3.event4133.2	Known-NMD	3.74e-08	0.0278	0.0439968	0.0723515	22.98, 18.97, 18.73, 17.66, 13.42	16.7, 14.07, 13.56, 12.73, 11.66, 10.68	306.46, 276.85, 261.21, 220.59, 206.52	353.52, 320.25, 311.63, 292.89, 270.91, 263.9
ir.D4.event3377	19	+	49497194	49498046	D4.event3377.1,D4.event3377.2,D4.event3377.3,D4.event3377.4	,49497325^49497520-,49497325^49497520-49497595^49497917-,49497595^49497917-	,1^2-,1^2-3^4-,3^4-	4	ENSG00000142534	RPS11	protein_coding	CDS.DOM	D4.event3377.3	Known-Coding	5.12e-08	1.19e-09	0.865783	0.882744	9671.77, 8879.15, 8828.07, 8593.63, 8528.2	8105.17, 7709.05, 7265.64, 6813.77, 6650.03, 6512.61	10959.39, 10157.77, 9983.16, 9675.26, 9636.76	9323.78, 8956.78, 8382.27, 7863.52, 7689.96, 7511.99
ir.D4.event3377	19	+	49497194	49498046	D4.event3377.1,D4.event3377.2,D4.event3377.3,D4.event3377.4	,49497325^49497520-,49497325^49497520-49497595^49497917-,49497595^49497917-	,1^2-,1^2-3^4-,3^4-	4	ENSG00000142534	RPS11	protein_coding	CDS.DOM	D4.event3377.2	PTC_50_All	5.12e-08	0.000270787	0.0528521	0.045408	519.17, 507.09, 453.43, 411.22, 400.55	476.3, 469.34, 447.99, 424.08, 407.66, 400.92	10959.39, 10157.77, 9983.16, 9675.26, 9636.76	9323.78, 8956.78, 8382.27, 7863.52, 7689.96, 7511.99
ir.D4.event3377	19	+	49497194	49498046	D4.event3377.1,D4.event3377.2,D4.event3377.3,D4.event3377.4	,49497325^49497520-,49497325^49497520-49497595^49497917-,49497595^49497917-	,1^2-,1^2-3^4-,3^4-	4	ENSG00000142534	RPS11	protein_coding	CDS.DOM	D4.event3377.4	PTC_50_All	5.12e-08	0.000991404	0.0766624	0.0683075	741.65, 717.5, 667.38, 665.26, 650.75	726.54, 708.26, 629.81, 612.77, 578.93, 556.86	10959.39, 10157.77, 9983.16, 9675.26, 9636.76	9323.78, 8956.78, 8382.27, 7863.52, 7689.96, 7511.99
ir.D4.event3377	19	+	49497194	49498046	D4.event3377.1,D4.event3377.2,D4.event3377.3,D4.event3377.4	,49497325^49497520-,49497325^49497520-49497595^49497917-,49497595^49497917-	,1^2-,1^2-3^4-,3^4-	4	ENSG00000142534	RPS11	protein_coding	CDS.DOM	D4.event3377.1	PTC_50_All	5.12e-08	0.299	0.00470259	0.00354042	41.95, 38.88, 34.28, 32.08, 30.33	44.89, 41.01, 38.83, 36.92, 36.06, 34.86	10959.39, 10157.77, 9983.16, 9675.26, 9636.76	9323.78, 8956.78, 8382.27, 7863.52, 7689.96, 7511.99
D2.event2827	11	+	112228673	112230626	D2.event2827.1,D2.event2827.2	,112230208-112230230^	,1-2^	2	ENSG00000150787	PTS	protein_coding	CDS.DOM	D2.event2827.1	Known-Coding	6.42e-08	0	0.0371369	0.152157	20, 16, 14, 12, 9	5, 4, 4, 3, 2, 2	114.29, 94.89, 93.9, 91.42, 72.45	122.37, 97.87, 87.38, 86.62, 82.99, 67.48
D2.event2827	11	+	112228673	112230626	D2.event2827.1,D2.event2827.2	,112230208-112230230^	,1-2^	2	ENSG00000150787	PTS	protein_coding	CDS.DOM	D2.event2827.2	Known-Coding	6.42e-08	0	0.962863	0.847843	98.29, 81.9, 77.42, 74.89, 63.45	117.37, 93.87, 84.62, 84.38, 80.99, 63.48	114.29, 94.89, 93.9, 91.42, 72.45	122.37, 97.87, 87.38, 86.62, 82.99, 67.48
ir.D4.event5169	5	+	66153463	66159334	D4.event5169.1,D4.event5169.2,D4.event5169.3,D4.event5169.4	66153596^66156065-,66153596^66158809-66158932^66159219-,66153596^66159219-,66158932^66159219-	1^2-,1^3-4^5-,1^5-,4^5-	4	ENSG00000153914	SREK1	protein_coding	CDS.DOM	D4.event5169.3	Known-Coding	1.06e-07	3.86e-08	0.543424	0.358538	47.5, 36, 33, 26, 25	78, 69, 64, 59.5, 52, 46	107.25, 97.73, 91.84, 90.36, 79.66	137.84, 117.54, 111.25, 110.46, 103.83, 96.98
ir.D4.event5169	5	+	66153463	66159334	D4.event5169.1,D4.event5169.2,D4.event5169.3,D4.event5169.4	66153596^66156065-,66153596^66158809-66158932^66159219-,66153596^66159219-,66158932^66159219-	1^2-,1^3-4^5-,1^5-,4^5-	4	ENSG00000153914	SREK1	protein_coding	CDS.DOM	D4.event5169.1	PTC_50_All	1.06e-07	0.000327	0.0633551	0.143839	14.83, 13.96, 12.96, 12.85, 12.49	10.2, 9.17, 8.12, 6.48, 4.47, 4.47	107.25, 97.73, 91.84, 90.36, 79.66	137.84, 117.54, 111.25, 110.46, 103.83, 96.98
ir.D4.event5169	5	+	66153463	66159334	D4.event5169.1,D4.event5169.2,D4.event5169.3,D4.event5169.4	66153596^66156065-,66153596^66158809-66158932^66159219-,66153596^66159219-,66158932^66159219-	1^2-,1^3-4^5-,1^5-,4^5-	4	ENSG00000153914	SREK1	protein_coding	CDS.DOM	D4.event5169.4	PTC_50_All	1.06e-07	0.713	0.277349	0.34202	38.34, 32.19, 30.98, 30.17, 27.98	37.23, 32.98, 31.43, 30.4, 29.93, 25.98	107.25, 97.73, 91.84, 90.36, 79.66	137.84, 117.54, 111.25, 110.46, 103.83, 96.98
ir.D4.event5169	5	+	66153463	66159334	D4.event5169.1,D4.event5169.2,D4.event5169.3,D4.event5169.4	66153596^66156065-,66153596^66158809-66158932^66159219-,66153596^66159219-,66158932^66159219-	1^2-,1^3-4^5-,1^5-,4^5-	4	ENSG00000153914	SREK1	protein_coding	CDS.DOM	D4.event5169.2	Known-Coding	1.06e-07	0.925642	0.115871	0.155603	16.73, 15.65, 13.6, 13.42, 13.19	17.44, 17.23, 14.49, 10.58, 9.8, 9	107.25, 97.73, 91.84, 90.36, 79.66	137.84, 117.54, 111.25, 110.46, 103.83, 96.98
D4.event14669	6	-	130870126	130885096	D4.event14669.1,D4.event14669.2,D4.event14669.3,D4.event14669.4	,130880206-130880144^130878250-130878104^,130880206-130880144^130878250-130878104^130876775-130876674^130870381-130870328^,130880206-130880144^130878250-130878104^130870381-130870328^	,1-2^3-4^,1-2^3-4^5-6^7-8^,1-2^3-4^7-8^	4	ENSG00000079819	EPB41L2	protein_coding	CDS.DOM	D4.event14669.4	Known-Coding	1.33e-07	0.000106056	0.187778	0.086907	10.69, 7.31, 6.34, 6.07, 5.24	23.78, 21.69, 20.11, 19.19, 18.93, 16.75	91.53, 85.71, 78.94, 78.08, 75.95	115.07, 111.2, 107.6, 105.29, 105.05, 97.24
D4.event14669	6	-	130870126	130885096	D4.event14669.1,D4.event14669.2,D4.event14669.3,D4.event14669.4	,130880206-130880144^130878250-130878104^,130880206-130880144^130878250-130878104^130876775-130876674^130870381-130870328^,130880206-130880144^130878250-130878104^130870381-130870328^	,1-2^3-4^,1-2^3-4^5-6^7-8^,1-2^3-4^7-8^	4	ENSG00000079819	EPB41L2	protein_coding	CDS.DOM	D4.event14669.3	Known-Coding	1.33e-07	0.00167992	0.136987	0.0609931	6.66, 5.46, 4.91, 4.23, 3.76	16.53, 16.44, 15.82, 13.54, 13.32, 12.22	91.53, 85.71, 78.94, 78.08, 75.95	115.07, 111.2, 107.6, 105.29, 105.05, 97.24
D4.event14669	6	-	130870126	130885096	D4.event14669.1,D4.event14669.2,D4.event14669.3,D4.event14669.4	,130880206-130880144^130878250-130878104^,130880206-130880144^130878250-130878104^130876775-130876674^130870381-130870328^,130880206-130880144^130878250-130878104^130870381-130870328^	,1-2^3-4^,1-2^3-4^5-6^7-8^,1-2^3-4^7-8^	4	ENSG00000079819	EPB41L2	protein_coding	CDS.DOM	D4.event14669.2	Known-Coding	1.33e-07	0.0101476	0.316673	0.425489	41.31, 39.41, 32.14, 31.6, 30.08	40.76, 35.97, 34.91, 34.24, 29.59, 27.66	91.53, 85.71, 78.94, 78.08, 75.95	115.07, 111.2, 107.6, 105.29, 105.05, 97.24
D4.event14669	6	-	130870126	130885096	D4.event14669.1,D4.event14669.2,D4.event14669.3,D4.event14669.4	,130880206-130880144^130878250-130878104^,130880206-130880144^130878250-130878104^130876775-130876674^130870381-130870328^,130880206-130880144^130878250-130878104^130870381-130870328^	,1-2^3-4^,1-2^3-4^5-6^7-8^,1-2^3-4^7-8^	4	ENSG00000079819	EPB41L2	protein_coding	CDS.DOM	D4.event14669.1	Known-Coding	1.33e-07	0.396168	0.358562	0.426611	39, 38, 36, 35, 27	43, 42, 41.5, 39.5, 34, 30	91.53, 85.71, 78.94, 78.08, 75.95	115.07, 111.2, 107.6, 105.29, 105.05, 97.24
D2.event13319	5	+	68280927	68292259	D2.event13319.1,D2.event13319.2	68281006^,68288751^	1^,2^	2	ENSG00000145675	PIK3R1	protein_coding	CDS.DOM	D2.event13319.1	Known-Coding	1.36e-07	0	0.922612	0.770556	85, 84.33, 77, 74.92, 65.83	145.17, 140, 136.67, 114, 101.83, 100.67	114, 106.33, 101, 94.83, 87.92	154.17, 153, 147.67, 122, 111.83, 109.67
D2.event13319	5	+	68280927	68292259	D2.event13319.1,D2.event13319.2	68281006^,68288751^	1^,2^	2	ENSG00000145675	PIK3R1	protein_coding	CDS.DOM	D2.event13319.2	PTC_50_All	1.36e-07	0	0.0773885	0.229444	37, 29, 22, 16, 13	13, 11, 10, 9, 9, 8	114, 106.33, 101, 94.83, 87.92	154.17, 153, 147.67, 122, 111.83, 109.67
D2.event17307	X	-	154352447	154352772	D2.event17307.1,D2.event17307.2	,154352675-154352553^	,1-2^	2	ENSG00000196924	FLNA	protein_coding	CDS.DOM	D2.event17307.2	Known-Coding	1.36e-07	0	0.945914	0.897989	437.69, 409.27, 392.72, 372.29, 357.42	495, 470.28, 467.41, 451.31, 411.45, 411.09	483.19, 452.77, 444.22, 412.29, 400.42	524, 498.41, 493.28, 474.31, 436.45, 434.59
D2.event17307	X	-	154352447	154352772	D2.event17307.1,D2.event17307.2	,154352675-154352553^	,1-2^	2	ENSG00000196924	FLNA	protein_coding	CDS.DOM	D2.event17307.1	Known-Coding	1.36e-07	0	0.0540864	0.102011	51.5, 45.5, 43.5, 43, 40	31, 29, 25, 23.5, 23, 23	483.19, 452.77, 444.22, 412.29, 400.42	524, 498.41, 493.28, 474.31, 436.45, 434.59
D2.event13407	5	+	103173972	103177667	D2.event13407.1,D2.event13407.2	,103176866-103176910^	,1-2^	2	ENSG00000145725	PPIP5K2	protein_coding	CDS	D2.event13407.1	Known-Coding	1.48e-07	0	0.882814	0.684724	65, 60, 50, 49, 40	120, 108, 86, 81, 67, 66	88.98, 80.78, 75.92, 73.45, 65.26	132.96, 116.49, 108.8, 89.49, 76.95, 73.48
D2.event13407	5	+	103173972	103177667	D2.event13407.1,D2.event13407.2	,103176866-103176910^	,1-2^	2	ENSG00000145725	PPIP5K2	protein_coding	CDS	D2.event13407.2	Known-Coding	1.48e-07	0	0.117186	0.315276	25.92, 25.26, 24.45, 23.98, 20.78	22.8, 12.96, 9.95, 8.49, 8.49, 7.48	88.98, 80.78, 75.92, 73.45, 65.26	132.96, 116.49, 108.8, 89.49, 76.95, 73.48
D4.event10778	20	-	2658522	2659525	D4.event10778.1,D4.event10778.2,D4.event10778.3,D4.event10778.4	,2658837-2658759^,2658837-2658638^,2658837-2658627^	,1-2^,1-3^,1-4^	4	ENSG00000101365	IDH3B	protein_coding	CDS.DOM	D4.event10778.1	Known-Coding	1.84e-07	1.46e-09	0.0389035	0.136702	29, 24, 24, 24, 17	11, 7, 6, 6, 5, 5	205.22, 174.61, 173.42, 160.36, 153.11	206.29, 193.57, 181.09, 174.92, 147.13, 145.68
D4.event10778	20	-	2658522	2659525	D4.event10778.1,D4.event10778.2,D4.event10778.3,D4.event10778.4	,2658837-2658759^,2658837-2658638^,2658837-2658627^	,1-2^,1-3^,1-4^	4	ENSG00000101365	IDH3B	protein_coding	CDS.DOM	D4.event10778.2	Known-Coding	1.84e-07	1	0.59413	0.544011	104.03, 98.08, 97.03, 91.85, 80.41	124.04, 114.7, 101.28, 97.92, 97.64, 86.79	205.22, 174.61, 173.42, 160.36, 153.11	206.29, 193.57, 181.09, 174.92, 147.13, 145.68
D4.event10778	20	-	2658522	2659525	D4.event10778.1,D4.event10778.2,D4.event10778.3,D4.event10778.4	,2658837-2658759^,2658837-2658638^,2658837-2658627^	,1-2^,1-3^,1-4^	4	ENSG00000101365	IDH3B	protein_coding	CDS.DOM	D4.event10778.3	Known-Coding	1.84e-07	1	0.245966	0.2159	53.34, 40.6, 39.78, 31.69, 22.89	60.33, 52.63, 48.58, 46.43, 29.66, 22.49	205.22, 174.61, 173.42, 160.36, 153.11	206.29, 193.57, 181.09, 174.92, 147.13, 145.68
D4.event10778	20	-	2658522	2659525	D4.event10778.1,D4.event10778.2,D4.event10778.3,D4.event10778.4	,2658837-2658759^,2658837-2658638^,2658837-2658627^	,1-2^,1-3^,1-4^	4	ENSG00000101365	IDH3B	protein_coding	CDS.DOM	D4.event10778.4	Known-Coding	1.84e-07	1	0.121001	0.103387	23.85, 17.79, 16.19, 15.84, 15.35	24.82, 24.29, 23.54, 22.8, 15.91, 14.83	205.22, 174.61, 173.42, 160.36, 153.11	206.29, 193.57, 181.09, 174.92, 147.13, 145.68
ir.D2.event3684	2	+	85542155	85542747	D2.event3684.1,D2.event3684.2	,85542373^85542565-	,1^2-	2	ENSG00000168906	MAT2A	protein_coding	CDS.DOM	D2.event3684.1	PTC_50_All	2.27e-07	0	0.11671	0.0603787	42, 36, 36, 32, 23	58, 44, 39, 36, 32, 32	658, 571, 556, 539, 481	368, 355, 344, 340, 332, 322
ir.D2.event3684	2	+	85542155	85542747	D2.event3684.1,D2.event3684.2	,85542373^85542565-	,1^2-	2	ENSG00000168906	MAT2A	protein_coding	CDS.DOM	D2.event3684.2	Known-Coding	2.27e-07	0	0.88329	0.939621	616, 535, 524, 503, 458	323, 310, 301, 300, 300, 286	658, 571, 556, 539, 481	368, 355, 344, 340, 332, 322
ir.D3.event6534	X	+	48902042	48902795	D3.event6534.1,D3.event6534.2,D3.event6534.3	48902233-,48902233-48902517^48902732-,48902732-	1-,1-2^3-,3-	3	ENSG00000102103	PQBP1	protein_coding	CDS	D3.event6534.3	Known-Coding	2.27e-07	2.41e-07	0.0461031	0.139572	26, 25, 24, 13.5, 10	12, 12, 10, 5, 4, 3	165.19, 158.7, 135.57, 129.36, 112.76	178.91, 171.23, 167.29, 163.94, 156.5, 148.99
ir.D3.event6534	X	+	48902042	48902795	D3.event6534.1,D3.event6534.2,D3.event6534.3	48902233-,48902233-48902517^48902732-,48902732-	1-,1-2^3-,3-	3	ENSG00000102103	PQBP1	protein_coding	CDS	D3.event6534.1	PTC_50_All	2.27e-07	0.0108783	0.181357	0.111016	22.45, 17.66, 16.67, 10.63, 10.39	35.47, 31.95, 30.74, 28.04, 26.5, 25.5	165.19, 158.7, 135.57, 129.36, 112.76	178.91, 171.23, 167.29, 163.94, 156.5, 148.99
ir.D3.event6534	X	+	48902042	48902795	D3.event6534.1,D3.event6534.2,D3.event6534.3	48902233-,48902233-48902517^48902732-,48902732-	1-,1-2^3-,3-	3	ENSG00000102103	PQBP1	protein_coding	CDS	D3.event6534.2	Known-Coding	2.27e-07	1	0.77254	0.749412	122.52, 112.25, 105.23, 92.91, 92.37	143.96, 136.49, 125.9, 119.82, 118.49, 118	165.19, 158.7, 135.57, 129.36, 112.76	178.91, 171.23, 167.29, 163.94, 156.5, 148.99
D3.event13966	5	-	177489771	177490870	D3.event13966.1,D3.event13966.3	177490593-,177489832-	1-,2-	2	ENSG00000196923	PDLIM7	protein_coding	CDS	D3.event13966.1	PTC_50_All	3.33e-07	0	0.402844	0.558724	79, 74, 67, 57, 51	77.5, 74, 73.33, 69, 63, 60	143, 122, 118, 103, 101	193.33, 183, 179.5, 168, 158, 153
D3.event13966	5	-	177489771	177490870	D3.event13966.1,D3.event13966.3	177490593-,177489832-	1-,2-	2	ENSG00000196923	PDLIM7	protein_coding	CDS	D3.event13966.3	Known-Coding	3.33e-07	0	0.597156	0.441276	64, 55, 52, 44, 44	120, 109, 102, 99, 98, 90	143, 122, 118, 103, 101	193.33, 183, 179.5, 168, 158, 153
ir.D2.event6073	7	-	108001558	108002971	D2.event6073.1,D2.event6073.2	,108002849^108001733-	,1^2-	2	ENSG00000091136	LAMB1	protein_coding	CDS.DOM	D2.event6073.1	PTC_50_All	3.77e-07	0	0.0519879	0.138608	29, 28, 24, 24, 23	9, 9, 7, 7, 4, 3	206, 202, 199, 172, 146	149, 134, 123, 122, 114, 109
ir.D2.event6073	7	-	108001558	108002971	D2.event6073.1,D2.event6073.2	,108002849^108001733-	,1^2-	2	ENSG00000091136	LAMB1	protein_coding	CDS.DOM	D2.event6073.2	Known-Coding	3.77e-07	0	0.948012	0.861392	178, 178, 170, 149, 122	140, 127, 119, 114, 107, 105	206, 202, 199, 172, 146	149, 134, 123, 122, 114, 109
ir.D4.event5789	6	-	79201245	79202389	D4.event5789.1,D4.event5789.2,D4.event5789.3,D4.event5789.4	,79202317^79201726-,79202276^79201726-,79202056^79201726-	,1^4-,2^4-,3^4-	4	ENSG00000118418	HMGN3	protein_coding	CDS.DOM	D4.event5789.3	Known-Coding	4.03e-07	3.37e-08	0.435147	0.520704	419, 394, 379.5, 364, 335	392, 386, 314, 306, 298, 296	834, 746.5, 722, 681, 667	962, 829.5, 767, 740, 670.5, 642
ir.D4.event5789	6	-	79201245	79202389	D4.event5789.1,D4.event5789.2,D4.event5789.3,D4.event5789.4	,79202317^79201726-,79202276^79201726-,79202056^79201726-	,1^4-,2^4-,3^4-	4	ENSG00000118418	HMGN3	protein_coding	CDS.DOM	D4.event5789.2	Known-Coding	4.03e-07	4.24e-05	0.504731	0.437149	375, 328, 300, 299, 287	516, 394.5, 387, 385, 329, 306	834, 746.5, 722, 681, 667	962, 829.5, 767, 740, 670.5, 642
ir.D4.event5789	6	-	79201245	79202389	D4.event5789.1,D4.event5789.2,D4.event5789.3,D4.event5789.4	,79202317^79201726-,79202276^79201726-,79202056^79201726-	,1^4-,2^4-,3^4-	4	ENSG00000118418	HMGN3	protein_coding	CDS.DOM	D4.event5789.1	In-Frame-Change	4.03e-07	0.0701519	0.0601219	0.0421468	37, 33, 29, 28, 25	68, 48, 45, 41.5, 37, 36	834, 746.5, 722, 681, 667	962, 829.5, 767, 740, 670.5, 642
D2.event12146	3	-	47851868	47853163	D2.event12146.1,D2.event12146.2	47853039-,47852938-	1-,2-	2	ENSG00000047849	MAP4	protein_coding	CDS	D2.event12146.1	Known-Coding	4.51e-07	0	0.761986	0.574932	77, 63, 62, 51, 43	91, 86, 84, 83, 79, 75	117, 111, 107, 93, 86	119, 110, 109, 105, 105, 105
D2.event12146	3	-	47851868	47853163	D2.event12146.1,D2.event12146.2	47853039-,47852938-	1-,2-	2	ENSG00000047849	MAP4	protein_coding	CDS	D2.event12146.2	Known-Coding	4.51e-07	0	0.238014	0.425068	50, 49, 44, 40, 35	30, 28, 27, 26, 23, 21	117, 111, 107, 93, 86	119, 110, 109, 105, 105, 105
ir.D6.event3935	2	-	70227735	70229264	D6.event3935.1,D6.event3935.2,D6.event3935.3,D6.event3935.5,D6.event3935.6	70229091-70229059^70228462-,70229091-70229059^70228462-70228344^70227822-,70229091-70229059^70227822-,70229091-70228344^70227822-,70227822-	1-2^3-,1-2^3-4^5-,1-2^5-,1-4^5-,5-	5	ENSG00000116001	TIA1	protein_coding	CDS.DOM	D6.event3935.6	Known-Coding	4.7e-07	1.98e-08	0.0643046	0.121691	51, 46, 44, 42, 41	34, 26, 22, 19, 18, 16	428.12, 374.69, 352.73, 351.31, 333.88	388.08, 378.42, 370.41, 352.4, 329.4, 280.66
ir.D6.event3935	2	-	70227735	70229264	D6.event3935.1,D6.event3935.2,D6.event3935.3,D6.event3935.5,D6.event3935.6	70229091-70229059^70228462-,70229091-70229059^70228462-70228344^70227822-,70229091-70229059^70227822-,70229091-70228344^70227822-,70227822-	1-2^3-,1-2^3-4^5-,1-2^5-,1-4^5-,5-	5	ENSG00000116001	TIA1	protein_coding	CDS.DOM	D6.event3935.2	Known-NMD	4.7e-07	0.306817	0.109404	0.0836243	40.53, 34.23, 27.99, 27.45, 23.73	48.72, 45.58, 40.04, 33.49, 31.28, 30.57	428.12, 374.69, 352.73, 351.31, 333.88	388.08, 378.42, 370.41, 352.4, 329.4, 280.66
ir.D6.event3935	2	-	70227735	70229264	D6.event3935.1,D6.event3935.2,D6.event3935.3,D6.event3935.5,D6.event3935.6	70229091-70229059^70228462-,70229091-70229059^70228462-70228344^70227822-,70229091-70229059^70227822-,70229091-70228344^70227822-,70227822-	1-2^3-,1-2^3-4^5-,1-2^5-,1-4^5-,5-	5	ENSG00000116001	TIA1	protein_coding	CDS.DOM	D6.event3935.3	Known-Coding	4.7e-07	1	0.527682	0.499845	205.82, 196.91, 180.5, 171.01, 165.84	198.14, 193.75, 191.53, 190.95, 190.6, 142.83	428.12, 374.69, 352.73, 351.31, 333.88	388.08, 378.42, 370.41, 352.4, 329.4, 280.66
ir.D6.event3935	2	-	70227735	70229264	D6.event3935.1,D6.event3935.2,D6.event3935.3,D6.event3935.5,D6.event3935.6	70229091-70229059^70228462-,70229091-70229059^70228462-70228344^70227822-,70229091-70229059^70227822-,70229091-70228344^70227822-,70227822-	1-2^3-,1-2^3-4^5-,1-2^5-,1-4^5-,5-	5	ENSG00000116001	TIA1	protein_coding	CDS.DOM	D6.event3935.1	PTC_50_All	4.7e-07	1	0.136574	0.130372	59.66, 47.5, 44.82, 44.13, 43.87	60.54, 56.16, 51.17, 41.55, 39.81, 37.49	428.12, 374.69, 352.73, 351.31, 333.88	388.08, 378.42, 370.41, 352.4, 329.4, 280.66
ir.D6.event3935	2	-	70227735	70229264	D6.event3935.1,D6.event3935.2,D6.event3935.3,D6.event3935.5,D6.event3935.6	70229091-70229059^70228462-,70229091-70229059^70228462-70228344^70227822-,70229091-70229059^70227822-,70229091-70228344^70227822-,70227822-	1-2^3-,1-2^3-4^5-,1-2^5-,1-4^5-,5-	5	ENSG00000116001	TIA1	protein_coding	CDS.DOM	D6.event3935.5	PTC_50_All	4.7e-07	1	0.162035	0.164467	71.11, 64.53, 57.95, 56.83, 52.32	69.87, 58.08, 57.91, 52.76, 51.49, 50.06	428.12, 374.69, 352.73, 351.31, 333.88	388.08, 378.42, 370.41, 352.4, 329.4, 280.66
ir.D2.event733	10	+	80504728	80507374	D2.event733.1,D2.event733.2	,80504778^80507228-	,1^2-	2	ENSG00000108219	TSPAN14	protein_coding	CDS.DOM	D2.event733.1	PTC_50_All	8.02e-07	0	0.772576	0.641625	100, 97, 95, 89, 77	176, 175, 156, 151, 148, 146	156, 155, 148, 142, 113	231, 222, 196, 195, 195, 193
ir.D2.event733	10	+	80504728	80507374	D2.event733.1,D2.event733.2	,80504778^80507228-	,1^2-	2	ENSG00000108219	TSPAN14	protein_coding	CDS.DOM	D2.event733.2	Known-Coding	8.02e-07	0	0.227424	0.358375	60, 59, 53, 48, 36	55, 50, 47, 47, 44, 37	156, 155, 148, 142, 113	231, 222, 196, 195, 195, 193
ir.D5.event4185	20	-	2658395	2659525	D5.event4185.1,D5.event4185.2,D5.event4185.3,D5.event4185.4,D5.event4185.5	2658837-,2658837-2658759^2658522-,2658837-2658638^2658522-,2658837-2658627^2658522-,2658522-	1-,1-2^5-,1-3^5-,1-4^5-,5-	5	ENSG00000101365	IDH3B	protein_coding	CDS.DOM	D5.event4185.5	Known-Coding	8.13e-07	9.32e-09	0.0179403	0.062871	29, 24, 24, 24, 17	11, 7, 6, 6, 5, 5	423.98, 409.36, 383.2, 353.82, 317.14	418.14, 397.56, 389.49, 381.86, 354.11, 332.37
ir.D5.event4185	20	-	2658395	2659525	D5.event4185.1,D5.event4185.2,D5.event4185.3,D5.event4185.4,D5.event4185.5	2658837-,2658837-2658759^2658522-,2658837-2658638^2658522-,2658837-2658627^2658522-,2658522-	1-,1-2^5-,1-3^5-,1-4^5-,5-	5	ENSG00000101365	IDH3B	protein_coding	CDS.DOM	D5.event4185.2	Known-Coding	8.13e-07	1	0.273769	0.250154	104.03, 98.08, 97.03, 91.85, 80.41	124.04, 114.7, 101.28, 97.92, 97.64, 86.79	423.98, 409.36, 383.2, 353.82, 317.14	418.14, 397.56, 389.49, 381.86, 354.11, 332.37
ir.D5.event4185	20	-	2658395	2659525	D5.event4185.1,D5.event4185.2,D5.event4185.3,D5.event4185.4,D5.event4185.5	2658837-,2658837-2658759^2658522-,2658837-2658638^2658522-,2658837-2658627^2658522-,2658522-	1-,1-2^5-,1-3^5-,1-4^5-,5-	5	ENSG00000101365	IDH3B	protein_coding	CDS.DOM	D5.event4185.3	Known-Coding	8.13e-07	1	0.114714	0.100553	54.08, 40.95, 40.28, 32.25, 23.19	61.37, 53.1, 48.91, 46.88, 30.13, 22.93	423.98, 409.36, 383.2, 353.82, 317.14	418.14, 397.56, 389.49, 381.86, 354.11, 332.37
ir.D5.event4185	20	-	2658395	2659525	D5.event4185.1,D5.event4185.2,D5.event4185.3,D5.event4185.4,D5.event4185.5	2658837-,2658837-2658759^2658522-,2658837-2658638^2658522-,2658837-2658627^2658522-,2658522-	1-,1-2^5-,1-3^5-,1-4^5-,5-	5	ENSG00000101365	IDH3B	protein_coding	CDS.DOM	D5.event4185.4	Known-Coding	8.13e-07	1	0.0564551	0.0481748	24.19, 18.01, 16.4, 16.12, 15.48	25.06, 24.45, 23.75, 23.19, 16.22, 15.07	423.98, 409.36, 383.2, 353.82, 317.14	418.14, 397.56, 389.49, 381.86, 354.11, 332.37
ir.D5.event4185	20	-	2658395	2659525	D5.event4185.1,D5.event4185.2,D5.event4185.3,D5.event4185.4,D5.event4185.5	2658837-,2658837-2658759^2658522-,2658837-2658638^2658522-,2658837-2658627^2658522-,2658522-	1-,1-2^5-,1-3^5-,1-4^5-,5-	5	ENSG00000101365	IDH3B	protein_coding	CDS.DOM	D5.event4185.1	Known-Coding	8.13e-07	1	0.537122	0.538248	235.22, 217.68, 207.75, 200.2, 156.3	211.16, 207.72, 207.68, 205.51, 203.5, 184.53	423.98, 409.36, 383.2, 353.82, 317.14	418.14, 397.56, 389.49, 381.86, 354.11, 332.37
D2.event15133	7	+	141738358	141739124	D2.event15133.1,D2.event15133.2	141738410^,141738503^	1^,2^	2	ENSG00000106028	SSBP1	protein_coding	UTR-5	D2.event15133.1	UTR-5	8.86e-07	0	0.763776	0.843383	351, 300.5, 299.5, 291, 260	303, 267, 248.5, 244.5, 241.5, 236	423.5, 354, 351, 347, 305.5	383.5, 355, 324, 323.5, 322.5, 308
D2.event15133	7	+	141738358	141739124	D2.event15133.1,D2.event15133.2	141738410^,141738503^	1^,2^	2	ENSG00000106028	SSBP1	protein_coding	UTR-5	D2.event15133.2	UTR-5	8.86e-07	0	0.236224	0.156617	72.5, 60, 53.5, 47.5, 45.5	88, 82, 80.5, 79.5, 74, 72	423.5, 354, 351, 347, 305.5	383.5, 355, 324, 323.5, 322.5, 308
ir.D3.event130	1	+	92837456	92840639	D3.event130.1,D3.event130.2,D3.event130.3	,92837630^92840551-,92837633^92840551-	,1^3-,2^3-	3	ENSG00000122406	RPL5	protein_coding	CDS.DOM	D3.event130.3	Known-Coding	9.13e-07	2.9e-08	0.901804	0.921448	3981, 3527, 3488.5, 3452, 3427	3135.5, 3021.33, 2826.5, 2740, 2609.17, 2536.5	4326, 3824, 3801.5, 3738, 3709	3491.5, 3341.33, 3126, 3043, 2858.17, 2845.5
ir.D3.event130	1	+	92837456	92840639	D3.event130.1,D3.event130.2,D3.event130.3	,92837630^92840551-,92837633^92840551-	,1^3-,2^3-	3	ENSG00000122406	RPL5	protein_coding	CDS.DOM	D3.event130.2	Known-Coding	9.13e-07	9.81e-08	0.0896073	0.0714039	318, 282, 268, 259, 258	325, 293, 286, 276, 272.5, 224	4326, 3824, 3801.5, 3738, 3709	3491.5, 3341.33, 3126, 3043, 2858.17, 2845.5
ir.D3.event130	1	+	92837456	92840639	D3.event130.1,D3.event130.2,D3.event130.3	,92837630^92840551-,92837633^92840551-	,1^3-,2^3-	3	ENSG00000122406	RPL5	protein_coding	CDS.DOM	D3.event130.1	PTC_50_All	9.13e-07	1	0.00858865	0.00714782	31, 29, 27, 27, 24	31, 27, 27, 27, 25, 23	4326, 3824, 3801.5, 3738, 3709	3491.5, 3341.33, 3126, 3043, 2858.17, 2845.5
D2.event12770	4	+	113369805	113373090	D2.event12770.1,D2.event12770.2	,113372533-113372625^	,1-2^	2	ENSG00000145362	ANK2	protein_coding	CDS	D2.event12770.1	Known-Coding	9.75e-07	0	0.768547	0.91727	124, 124, 123, 103, 99	65, 54, 52, 52, 50, 39	136.25, 132.38, 131.94, 111.77, 111.41	80.97, 68.88, 65.96, 63.96, 63.27, 62.81
D2.event12770	4	+	113369805	113373090	D2.event12770.1,D2.event12770.2	,113372533-113372625^	,1-2^	2	ENSG00000145362	ANK2	protein_coding	CDS	D2.event12770.2	Known-Coding	9.75e-07	0	0.231453	0.0827301	12.41, 12.25, 9.38, 8.77, 7.94	23.81, 16.88, 15.97, 13.27, 11.96, 11.96	136.25, 132.38, 131.94, 111.77, 111.41	80.97, 68.88, 65.96, 63.96, 63.27, 62.81
D2.event5105	14	+	103729182	103732620	D2.event5105.1,D2.event5105.2	,103729793-103729846^	,1-2^	2	ENSG00000100711	ZFYVE21	protein_coding	CDS.DOM	D2.event5105.1	Known-Coding	1.4e-06	0	0.459233	0.253307	19, 17, 16, 14, 13	47, 37, 36, 35, 32, 29	67.08, 66.96, 66.5, 57.27, 54.47	91.47, 84.84, 77.42, 74.5, 71.47, 70.5
D2.event5105	14	+	103729182	103732620	D2.event5105.1,D2.event5105.2	,103729793-103729846^	,1-2^	2	ENSG00000100711	ZFYVE21	protein_coding	CDS.DOM	D2.event5105.2	Known-Coding	1.4e-06	0	0.540767	0.746693	53.96, 50.08, 47.5, 43.27, 38.47	49.84, 44.47, 41.5, 40.42, 39.47, 38.5	67.08, 66.96, 66.5, 57.27, 54.47	91.47, 84.84, 77.42, 74.5, 71.47, 70.5
D3.event9225	2	+	271939	275140	D3.event9225.1,D3.event9225.2,D3.event9225.3	272037-272065^272192-272305^,272037-272150^,272192-272305^	1-2^4-5^,1-3^,4-5^	3	ENSG00000143727	ACP1	protein_coding	CDS.DOM	D3.event9225.2	Known-Coding	1.8e-06	4.7e-08	0.728097	0.65678	412.46, 372.91, 372.85, 357.07, 341.91	509.96, 480.18, 474.07, 464.83, 454.22, 404	630.51, 564.09, 560.87, 550.48, 521.59	698.65, 646.71, 645.77, 639.12, 624.4, 572.96
D3.event9225	2	+	271939	275140	D3.event9225.1,D3.event9225.2,D3.event9225.3	272037-272065^272192-272305^,272037-272150^,272192-272305^	1-2^4-5^,1-3^,4-5^	3	ENSG00000143727	ACP1	protein_coding	CDS.DOM	D3.event9225.1	Known-NMD	1.8e-06	0.000359425	0.151987	0.193567	130.03, 110.53, 109.92, 100.61, 96.27	108.23, 97.57, 97.44, 96.48, 94.86, 86.94	630.51, 564.09, 560.87, 550.48, 521.59	698.65, 646.71, 645.77, 639.12, 624.4, 572.96
D3.event9225	2	+	271939	275140	D3.event9225.1,D3.event9225.2,D3.event9225.3	272037-272065^272192-272305^,272037-272150^,272192-272305^	1-2^4-5^,1-3^,4-5^	3	ENSG00000143727	ACP1	protein_coding	CDS.DOM	D3.event9225.3	Known-Coding	1.8e-06	0.0122663	0.119915	0.149653	93.27, 88.02, 83.41, 81.32, 76.96	86.08, 82.02, 80.46, 73.7, 69.09, 67.48	630.51, 564.09, 560.87, 550.48, 521.59	698.65, 646.71, 645.77, 639.12, 624.4, 572.96
D2.event10272	2	-	127064018	127068924	D2.event10272.1,D2.event10272.2	,127068255-127068163^	,1-2^	2	ENSG00000136717	BIN1	protein_coding	CDS.DOM	D2.event10272.1	Known-Coding	2.63e-06	0	0.918595	0.781761	80, 71, 64, 52, 49	122, 115, 105, 104, 102.5, 92	100.35, 86.08, 81.32, 70.89, 64.87	129.94, 124.17, 114, 112.5, 108.9, 107.49
D2.event10272	2	-	127064018	127068924	D2.event10272.1,D2.event10272.2	,127068255-127068163^	,1-2^	2	ENSG00000136717	BIN1	protein_coding	CDS.DOM	D2.event10272.2	Known-Coding	2.63e-06	0	0.0814049	0.218239	20.35, 18.89, 17.32, 15.87, 15.08	15.49, 10, 9.17, 9, 7.94, 4.9	100.35, 86.08, 81.32, 70.89, 64.87	129.94, 124.17, 114, 112.5, 108.9, 107.49
D3.event14565	6	-	79201726	79202389	D3.event14565.1,D3.event14565.2,D3.event14565.3	79202317^,79202276^,79202056^	1^,2^,3^	3	ENSG00000118418	HMGN3	protein_coding	CDS.DOM	D3.event14565.1	Known-Coding	3e-06	0	0.537025	0.456384	375, 328, 300, 299, 287	516, 394.5, 387, 385, 329, 306	797, 713.5, 694, 656, 638	914, 784.5, 704, 699, 629, 605
D3.event14565	6	-	79201726	79202389	D3.event14565.1,D3.event14565.2,D3.event14565.3	79202317^,79202276^,79202056^	1^,2^,3^	3	ENSG00000118418	HMGN3	protein_coding	CDS.DOM	D3.event14565.2	Known-Coding	3e-06	0	0.462975	0.543616	419, 394, 379.5, 364, 335	392, 386, 314, 306, 298, 296	797, 713.5, 694, 656, 638	914, 784.5, 704, 699, 629, 605
D2.event12300	3	-	78646190	78651732	D2.event12300.1,D2.event12300.2	,78647655-78647629^	,1-2^	2	ENSG00000169855	ROBO1	protein_coding	CDS.DOM	D2.event12300.1	Known-Coding	3.23e-06	0	0.445598	0.646192	74, 72, 69, 62, 53	34, 30, 29, 27, 23, 22	115.5, 114.5, 98.46, 91.29, 90.88	78.19, 67.96, 65.3, 58.22, 50.71, 50.28
D2.event12300	3	-	78646190	78651732	D2.event12300.1,D2.event12300.2	,78647655-78647629^	,1-2^	2	ENSG00000169855	ROBO1	protein_coding	CDS.DOM	D2.event12300.2	Known-Coding	3.23e-06	0	0.554402	0.353808	43.5, 40.5, 37.88, 29.46, 29.29	48.19, 38.96, 31.3, 31.22, 28.28, 27.71	115.5, 114.5, 98.46, 91.29, 90.88	78.19, 67.96, 65.3, 58.22, 50.71, 50.28
D6.event5103	14	+	103677523	103700727	D6.event5103.1,D6.event5103.2,D6.event5103.3,D6.event5103.4,D6.event5103.5,D6.event5103.6	103679384-103679518^103700655-,103679384-103679545^103687081-103687211^103692359-103692425^103693553-,103679384-103679545^103687081-103687211^103692359-103692425^103700655-,103679384-103679545^103687081-103687211^103700655-,103679384-103679545^103700655-,103679408-103679545^103687081-103687211^103692359-103692425^103693553-	1-3^10-,1-4^10-,1-4^5-6^10-,1-4^5-6^7-8^10-,1-4^5-6^7-8^9-,2-4^5-6^7-8^9-	6	ENSG00000269958	RP11-73M18.8	sense_intronic	Non-Coding	D6.event5103.2	Non-Coding	3.27e-06	0.00557314	0.130239	0.175469	77.13, 66.84, 60.41, 56.86, 50.76	50.24, 49.63, 49.58, 44.38, 44.31, 41.41	403.14, 381.68, 345.59, 330.41, 317.24	381.96, 380.81, 376.94, 343.43, 333.71, 329.79
D6.event5103	14	+	103677523	103700727	D6.event5103.1,D6.event5103.2,D6.event5103.3,D6.event5103.4,D6.event5103.5,D6.event5103.6	103679384-103679518^103700655-,103679384-103679545^103687081-103687211^103692359-103692425^103693553-,103679384-103679545^103687081-103687211^103692359-103692425^103700655-,103679384-103679545^103687081-103687211^103700655-,103679384-103679545^103700655-,103679408-103679545^103687081-103687211^103692359-103692425^103693553-	1-3^10-,1-4^10-,1-4^5-6^10-,1-4^5-6^7-8^10-,1-4^5-6^7-8^9-,2-4^5-6^7-8^9-	6	ENSG00000269958	RP11-73M18.8	sense_intronic	Non-Coding	D6.event5103.1	Known-Coding	3.27e-06	0.0132262	0.232408	0.184003	80.55, 68.85, 66.11, 60.87, 50.8	100.92, 86.08, 84.99, 78.29, 78.29, 70.35	403.14, 381.68, 345.59, 330.41, 317.24	381.96, 380.81, 376.94, 343.43, 333.71, 329.79
D6.event5103	14	+	103677523	103700727	D6.event5103.1,D6.event5103.2,D6.event5103.3,D6.event5103.4,D6.event5103.5,D6.event5103.6	103679384-103679518^103700655-,103679384-103679545^103687081-103687211^103692359-103692425^103693553-,103679384-103679545^103687081-103687211^103692359-103692425^103700655-,103679384-103679545^103687081-103687211^103700655-,103679384-103679545^103700655-,103679408-103679545^103687081-103687211^103692359-103692425^103693553-	1-3^10-,1-4^10-,1-4^5-6^10-,1-4^5-6^7-8^10-,1-4^5-6^7-8^9-,2-4^5-6^7-8^9-	6	ENSG00000269958	RP11-73M18.8	sense_intronic	Non-Coding	D6.event5103.5	Known-Coding	3.27e-06	0.0415767	0.276436	0.22889	87.12, 83.7, 81.46, 80.94, 73.72	118.94, 112.1, 95.49, 92.47, 90.89, 83.57	403.14, 381.68, 345.59, 330.41, 317.24	381.96, 380.81, 376.94, 343.43, 333.71, 329.79
D6.event5103	14	+	103677523	103700727	D6.event5103.1,D6.event5103.2,D6.event5103.3,D6.event5103.4,D6.event5103.5,D6.event5103.6	103679384-103679518^103700655-,103679384-103679545^103687081-103687211^103692359-103692425^103693553-,103679384-103679545^103687081-103687211^103692359-103692425^103700655-,103679384-103679545^103687081-103687211^103700655-,103679384-103679545^103700655-,103679408-103679545^103687081-103687211^103692359-103692425^103693553-	1-3^10-,1-4^10-,1-4^5-6^10-,1-4^5-6^7-8^10-,1-4^5-6^7-8^9-,2-4^5-6^7-8^9-	6	ENSG00000269958	RP11-73M18.8	sense_intronic	Non-Coding	D6.event5103.6	Non-Coding	3.27e-06	0.191107	0.0841175	0.111383	47.47, 43.83, 38.86, 34.11, 33.76	31.07, 30.93, 30.51, 30.19, 29.89, 27.94	403.14, 381.68, 345.59, 330.41, 317.24	381.96, 380.81, 376.94, 343.43, 333.71, 329.79
D6.event5103	14	+	103677523	103700727	D6.event5103.1,D6.event5103.2,D6.event5103.3,D6.event5103.4,D6.event5103.5,D6.event5103.6	103679384-103679518^103700655-,103679384-103679545^103687081-103687211^103692359-103692425^103693553-,103679384-103679545^103687081-103687211^103692359-103692425^103700655-,103679384-103679545^103687081-103687211^103700655-,103679384-103679545^103700655-,103679408-103679545^103687081-103687211^103692359-103692425^103693553-	1-3^10-,1-4^10-,1-4^5-6^10-,1-4^5-6^7-8^10-,1-4^5-6^7-8^9-,2-4^5-6^7-8^9-	6	ENSG00000269958	RP11-73M18.8	sense_intronic	Non-Coding	D6.event5103.3	Non-Coding	3.27e-06	1	0.106959	0.125538	49.71, 49.4, 46.22, 44.12, 33.75	41.74, 41.67, 38.18, 36.89, 36.18, 34.91	403.14, 381.68, 345.59, 330.41, 317.24	381.96, 380.81, 376.94, 343.43, 333.71, 329.79
D6.event5103	14	+	103677523	103700727	D6.event5103.1,D6.event5103.2,D6.event5103.3,D6.event5103.4,D6.event5103.5,D6.event5103.6	103679384-103679518^103700655-,103679384-103679545^103687081-103687211^103692359-103692425^103693553-,103679384-103679545^103687081-103687211^103692359-103692425^103700655-,103679384-103679545^103687081-103687211^103700655-,103679384-103679545^103700655-,103679408-103679545^103687081-103687211^103692359-103692425^103693553-	1-3^10-,1-4^10-,1-4^5-6^10-,1-4^5-6^7-8^10-,1-4^5-6^7-8^9-,2-4^5-6^7-8^9-	6	ENSG00000269958	RP11-73M18.8	sense_intronic	Non-Coding	D6.event5103.4	Known-Coding	3.27e-06	1	0.169839	0.174717	78.82, 73.81, 57.06, 55.28, 45.74	74.88, 67.2, 63.61, 56.15, 53.79, 48.98	403.14, 381.68, 345.59, 330.41, 317.24	381.96, 380.81, 376.94, 343.43, 333.71, 329.79
ir.D2.event4697	3	+	180962883	180963090	D2.event4697.1,D2.event4697.2	,180962940^180963028-	,1^2-	2	ENSG00000114416	FXR1	protein_coding	CDS.DOM	D2.event4697.1	In-Frame-Change	4.18e-06	0	0.164231	0.244098	87, 80.5, 71, 70, 61	59, 54, 48, 46, 45, 43	319, 310.5, 304, 300, 280	345, 302, 299, 292, 284, 275
ir.D2.event4697	3	+	180962883	180963090	D2.event4697.1,D2.event4697.2	,180962940^180963028-	,1^2-	2	ENSG00000114416	FXR1	protein_coding	CDS.DOM	D2.event4697.2	Known-Coding	4.18e-06	0	0.83577	0.755902	234, 232, 230, 229, 219	286, 251, 248, 247, 238, 232	319, 310.5, 304, 300, 280	345, 302, 299, 292, 284, 275
D2.event8297	19	+	10795439	10798486	D2.event8297.1,D2.event8297.2	10796061-10796199^,10797380-10797518^	1-2^,3-4^	2	ENSG00000079805	DNM2	protein_coding	CDS.DOM	D2.event8297.1	Known-Coding	4.61e-06	0	0.306349	0.157436	18.65, 15.3, 15.1, 13.08, 9.49	40.02, 36.75, 35.85, 30.05, 30, 28.57	95.84, 94.8, 92.04, 86.9, 85.96	124.23, 121.26, 107.57, 105.72, 103.5, 95.13
D2.event8297	19	+	10795439	10798486	D2.event8297.1,D2.event8297.2	10796061-10796199^,10797380-10797518^	1-2^,3-4^	2	ENSG00000079805	DNM2	protein_coding	CDS.DOM	D2.event8297.2	Known-Coding	4.61e-06	0	0.693651	0.842564	82.55, 80.74, 79.5, 72.88, 68.25	88.38, 81.24, 77.57, 77.15, 66.75, 65.08	95.84, 94.8, 92.04, 86.9, 85.96	124.23, 121.26, 107.57, 105.72, 103.5, 95.13
D2.event12768	4	+	113346022	113350228	D2.event12768.1,D2.event12768.2	,113348276-113348308^	,1-2^	2	ENSG00000145362	ANK2	protein_coding	CDS.DOM	D2.event12768.1	Known-Coding	4.61e-06	0	0.715849	0.514555	73, 52.5, 48, 42, 40	51, 50, 48, 47, 38, 36	127.5, 108.39, 90.5, 85, 83.99	68.62, 68.15, 67.49, 57.82, 57.48, 57.44
D2.event12768	4	+	113346022	113350228	D2.event12768.1,D2.event12768.2	,113348276-113348308^	,1-2^	2	ENSG00000145362	ANK2	protein_coding	CDS.DOM	D2.event12768.2	Known-Coding	4.61e-06	0	0.284151	0.485445	55.89, 54.5, 43.99, 43, 42.5	21.48, 20.62, 19.44, 17.49, 17.15, 10.82	127.5, 108.39, 90.5, 85, 83.99	68.62, 68.15, 67.49, 57.82, 57.48, 57.44
D2.event14374	6	+	163563719	163566795	D2.event14374.1,D2.event14374.2	163565946-,163566721-	1-,2-	2	ENSG00000112531	QKI	protein_coding	CDS.DOM	D2.event14374.1	Known-Coding	5.1e-06	0	0.210953	0.316755	149, 149, 146, 135, 126	45, 44, 40, 34, 28, 24	489, 446, 431.5, 431, 430	206, 187, 177, 158, 148, 143
D2.event14374	6	+	163563719	163566795	D2.event14374.1,D2.event14374.2	163565946-,163566721-	1-,2-	2	ENSG00000112531	QKI	protein_coding	CDS.DOM	D2.event14374.2	Known-Coding	5.1e-06	0	0.789047	0.683245	340, 304, 297, 296, 285.5	166, 153, 133, 124, 115, 113	489, 446, 431.5, 431, 430	206, 187, 177, 158, 148, 143
D2.event1259	1	-	62543745	62552732	D2.event1259.1,D2.event1259.2	,62545039-62544947^	,1-2^	2	ENSG00000116641	DOCK7	protein_coding	CDS	D2.event1259.2	Known-Coding	5.1e-06	0	0.396143	0.242627	35.87, 28.77, 28.39, 27.5, 25	39.99, 37.09, 36.33, 33.2, 32.98, 30.94	143.77, 136.87, 116.5, 109, 94.39	95.99, 95.33, 89.2, 89.09, 84.98, 76.94
D2.event1259	1	-	62543745	62552732	D2.event1259.1,D2.event1259.2	,62545039-62544947^	,1-2^	2	ENSG00000116641	DOCK7	protein_coding	CDS	D2.event1259.1	Known-Coding	5.1e-06	0	0.603857	0.757373	115, 101, 89, 84, 66	59, 56, 56, 52, 52, 46	143.77, 136.87, 116.5, 109, 94.39	95.99, 95.33, 89.2, 89.09, 84.98, 76.94
D3.event3340	11	-	115178775	115209574	D3.event3340.1,D3.event3340.2,D3.event3340.3	,115198438-115198406^,115198438-115198406^115190941-115190888^	,1-2^,1-2^3-4^	3	ENSG00000182985	CADM1	protein_coding	CDS	D3.event3340.1	Known-Coding	7.63e-06	2.95e-07	0.598546	0.391805	68, 67.17, 60.17, 57.33, 57	33.5, 29.83, 28.5, 21.5, 20.5, 20.33	166.43, 164.75, 158.45, 155.62, 145.19	48.1, 46.81, 43.68, 41.86, 41.15, 35.81
D3.event3340	11	-	115178775	115209574	D3.event3340.1,D3.event3340.2,D3.event3340.3	,115198438-115198406^,115198438-115198406^115190941-115190888^	,1-2^,1-2^3-4^	3	ENSG00000182985	CADM1	protein_coding	CDS	D3.event3340.2	Known-Coding	7.63e-06	0.00114292	0.316582	0.459446	86, 75.26, 75.07, 66.08, 60.98	16.49, 16.49, 15.72, 11.49, 11.4, 9.89	166.43, 164.75, 158.45, 155.62, 145.19	48.1, 46.81, 43.68, 41.86, 41.15, 35.81
D3.event3340	11	-	115178775	115209574	D3.event3340.1,D3.event3340.2,D3.event3340.3	,115198438-115198406^,115198438-115198406^115190941-115190888^	,1-2^,1-2^3-4^	3	ENSG00000182985	CADM1	protein_coding	CDS	D3.event3340.3	Known-Coding	7.63e-06	0.114553	0.0848724	0.148749	26.64, 26.38, 22.32, 21.78, 20.26	5.1, 4.87, 3.42, 3.11, 2.82, 2.45	166.43, 164.75, 158.45, 155.62, 145.19	48.1, 46.81, 43.68, 41.86, 41.15, 35.81
D2.event12472	3	-	170868013	170868298	D2.event12472.1,D2.event12472.2	170868201-,170868134-	1-,2-	2	ENSG00000163584	RPL22L1	protein_coding	CDS.DOM	D2.event12472.2	Known-Coding	8.83e-06	0	0.891512	0.796652	130, 124, 119, 102, 76	318, 308, 304, 299, 286, 266	162, 152, 143, 126, 108	352, 347, 339, 329, 327, 303
D2.event12472	3	-	170868013	170868298	D2.event12472.1,D2.event12472.2	170868201-,170868134-	1-,2-	2	ENSG00000163584	RPL22L1	protein_coding	CDS.DOM	D2.event12472.1	Known-NMD	8.83e-06	0	0.108488	0.203348	32, 32, 28, 24, 24	44, 41, 37, 35, 30, 29	162, 152, 143, 126, 108	352, 347, 339, 329, 327, 303
ir.D8.event1463	12	+	98537475	98546447	D8.event1463.1,D8.event1463.2,D8.event1463.3,D8.event1463.4,D8.event1463.5,D8.event1463.6,D8.event1463.7,D8.event1463.8	98537572^98544230-98544349^98544442-98544537^98544951-,98537572^98544230-98544349^98544442-98544537^98544951-98545061^98546359-,98537572^98544230-98544349^98544442-98545061^98546359-,98537572^98544230-98544537^98544951-98545061^98546359-,98537572^98544442-98544537^98544951-98545061^98546359-,98537572^98544951-98545061^98546359-,98537572^98546359-,98544349^98544442-98544537^98544951-98545061^98546…	1^2-3^4-5^6-,1^2-3^4-5^6-7^8-,1^2-3^4-7^8-,1^2-5^6-7^8-,1^4-5^6-7^8-,1^6-7^8-,1^8-,3^4-5^6-7^8-	8	ENSG00000120802	TMPO	protein_coding	UTR-3	D8.event1463.7	Known-Coding	1.09e-05	6.42e-05	0.0365813	0.0559858	114, 94.5, 87, 82.5, 56	96, 87.5, 83, 77, 74, 71	1706.81, 1630.07, 1528.83, 1527.61, 1322.5	2480.09, 2420.94, 2307.42, 2134.55, 2082.12, 1980.74
ir.D8.event1463	12	+	98537475	98546447	D8.event1463.1,D8.event1463.2,D8.event1463.3,D8.event1463.4,D8.event1463.5,D8.event1463.6,D8.event1463.7,D8.event1463.8	98537572^98544230-98544349^98544442-98544537^98544951-,98537572^98544230-98544349^98544442-98544537^98544951-98545061^98546359-,98537572^98544230-98544349^98544442-98545061^98546359-,98537572^98544230-98544537^98544951-98545061^98546359-,98537572^98544442-98544537^98544951-98545061^98546359-,98537572^98544951-98545061^98546359-,98537572^98546359-,98544349^98544442-98544537^98544951-98545061^98546…	1^2-3^4-5^6-,1^2-3^4-5^6-7^8-,1^2-3^4-7^8-,1^2-5^6-7^8-,1^4-5^6-7^8-,1^6-7^8-,1^8-,3^4-5^6-7^8-	8	ENSG00000120802	TMPO	protein_coding	UTR-3	D8.event1463.6	Known-Coding	1.09e-05	0.0132536	0.069515	0.0524644	90.88, 81.32, 78.61, 76.75, 75.67	194.77, 179.33, 178.31, 131.53, 129.43, 122.47	1706.81, 1630.07, 1528.83, 1527.61, 1322.5	2480.09, 2420.94, 2307.42, 2134.55, 2082.12, 1980.74
ir.D8.event1463	12	+	98537475	98546447	D8.event1463.1,D8.event1463.2,D8.event1463.3,D8.event1463.4,D8.event1463.5,D8.event1463.6,D8.event1463.7,D8.event1463.8	98537572^98544230-98544349^98544442-98544537^98544951-,98537572^98544230-98544349^98544442-98544537^98544951-98545061^98546359-,98537572^98544230-98544349^98544442-98545061^98546359-,98537572^98544230-98544537^98544951-98545061^98546359-,98537572^98544442-98544537^98544951-98545061^98546359-,98537572^98544951-98545061^98546359-,98537572^98546359-,98544349^98544442-98544537^98544951-98545061^98546…	1^2-3^4-5^6-,1^2-3^4-5^6-7^8-,1^2-3^4-7^8-,1^2-5^6-7^8-,1^4-5^6-7^8-,1^6-7^8-,1^8-,3^4-5^6-7^8-	8	ENSG00000120802	TMPO	protein_coding	UTR-3	D8.event1463.5	Known-Coding	1.09e-05	1	0.0752702	0.0650347	122.55, 107.21, 106.62, 105.25, 62.29	180.65, 179.48, 177.97, 165.75, 160.85, 142.29	1706.81, 1630.07, 1528.83, 1527.61, 1322.5	2480.09, 2420.94, 2307.42, 2134.55, 2082.12, 1980.74
ir.D8.event1463	12	+	98537475	98546447	D8.event1463.1,D8.event1463.2,D8.event1463.3,D8.event1463.4,D8.event1463.5,D8.event1463.6,D8.event1463.7,D8.event1463.8	98537572^98544230-98544349^98544442-98544537^98544951-,98537572^98544230-98544349^98544442-98544537^98544951-98545061^98546359-,98537572^98544230-98544349^98544442-98545061^98546359-,98537572^98544230-98544537^98544951-98545061^98546359-,98537572^98544442-98544537^98544951-98545061^98546359-,98537572^98544951-98545061^98546359-,98537572^98546359-,98544349^98544442-98544537^98544951-98545061^98546…	1^2-3^4-5^6-,1^2-3^4-5^6-7^8-,1^2-3^4-7^8-,1^2-5^6-7^8-,1^4-5^6-7^8-,1^6-7^8-,1^8-,3^4-5^6-7^8-	8	ENSG00000120802	TMPO	protein_coding	UTR-3	D8.event1463.1	UTR-3	1.09e-05	1	0.112203	0.12087	211.11, 205.41, 181.56, 174.46, 159.54	266, 265.07, 260.97, 246.71, 231.97, 230.55	1706.81, 1630.07, 1528.83, 1527.61, 1322.5	2480.09, 2420.94, 2307.42, 2134.55, 2082.12, 1980.74
ir.D8.event1463	12	+	98537475	98546447	D8.event1463.1,D8.event1463.2,D8.event1463.3,D8.event1463.4,D8.event1463.5,D8.event1463.6,D8.event1463.7,D8.event1463.8	98537572^98544230-98544349^98544442-98544537^98544951-,98537572^98544230-98544349^98544442-98544537^98544951-98545061^98546359-,98537572^98544230-98544349^98544442-98545061^98546359-,98537572^98544230-98544537^98544951-98545061^98546359-,98537572^98544442-98544537^98544951-98545061^98546359-,98537572^98544951-98545061^98546359-,98537572^98546359-,98544349^98544442-98544537^98544951-98545061^98546…	1^2-3^4-5^6-,1^2-3^4-5^6-7^8-,1^2-3^4-7^8-,1^2-5^6-7^8-,1^4-5^6-7^8-,1^6-7^8-,1^8-,3^4-5^6-7^8-	8	ENSG00000120802	TMPO	protein_coding	UTR-3	D8.event1463.2	Known-Coding	1.09e-05	1	0.317058	0.310366	537.66, 516.7, 489.66, 457.27, 394.67	772.14, 747.91, 743.33, 695.3, 650.69, 639.25	1706.81, 1630.07, 1528.83, 1527.61, 1322.5	2480.09, 2420.94, 2307.42, 2134.55, 2082.12, 1980.74
ir.D8.event1463	12	+	98537475	98546447	D8.event1463.1,D8.event1463.2,D8.event1463.3,D8.event1463.4,D8.event1463.5,D8.event1463.6,D8.event1463.7,D8.event1463.8	98537572^98544230-98544349^98544442-98544537^98544951-,98537572^98544230-98544349^98544442-98544537^98544951-98545061^98546359-,98537572^98544230-98544349^98544442-98545061^98546359-,98537572^98544230-98544537^98544951-98545061^98546359-,98537572^98544442-98544537^98544951-98545061^98546359-,98537572^98544951-98545061^98546359-,98537572^98546359-,98544349^98544442-98544537^98544951-98545061^98546…	1^2-3^4-5^6-,1^2-3^4-5^6-7^8-,1^2-3^4-7^8-,1^2-5^6-7^8-,1^4-5^6-7^8-,1^6-7^8-,1^8-,3^4-5^6-7^8-	8	ENSG00000120802	TMPO	protein_coding	UTR-3	D8.event1463.8	UTR-3	1.09e-05	1	0.135273	0.140193	239.36, 238.78, 218.26, 207.59, 177.49	337.59, 321.14, 316.28, 283.05, 280.15, 273.49	1706.81, 1630.07, 1528.83, 1527.61, 1322.5	2480.09, 2420.94, 2307.42, 2134.55, 2082.12, 1980.74
ir.D8.event1463	12	+	98537475	98546447	D8.event1463.1,D8.event1463.2,D8.event1463.3,D8.event1463.4,D8.event1463.5,D8.event1463.6,D8.event1463.7,D8.event1463.8	98537572^98544230-98544349^98544442-98544537^98544951-,98537572^98544230-98544349^98544442-98544537^98544951-98545061^98546359-,98537572^98544230-98544349^98544442-98545061^98546359-,98537572^98544230-98544537^98544951-98545061^98546359-,98537572^98544442-98544537^98544951-98545061^98546359-,98537572^98544951-98545061^98546359-,98537572^98546359-,98544349^98544442-98544537^98544951-98545061^98546…	1^2-3^4-5^6-,1^2-3^4-5^6-7^8-,1^2-3^4-7^8-,1^2-5^6-7^8-,1^4-5^6-7^8-,1^6-7^8-,1^8-,3^4-5^6-7^8-	8	ENSG00000120802	TMPO	protein_coding	UTR-3	D8.event1463.4	UTR-3	1.09e-05	1	0.137178	0.140156	237.84, 228.18, 209.67, 202.41, 201.67	357.26, 338.86, 322.02, 310.81, 258, 254.51	1706.81, 1630.07, 1528.83, 1527.61, 1322.5	2480.09, 2420.94, 2307.42, 2134.55, 2082.12, 1980.74
ir.D8.event1463	12	+	98537475	98546447	D8.event1463.1,D8.event1463.2,D8.event1463.3,D8.event1463.4,D8.event1463.5,D8.event1463.6,D8.event1463.7,D8.event1463.8	98537572^98544230-98544349^98544442-98544537^98544951-,98537572^98544230-98544349^98544442-98544537^98544951-98545061^98546359-,98537572^98544230-98544349^98544442-98545061^98546359-,98537572^98544230-98544537^98544951-98545061^98546359-,98537572^98544442-98544537^98544951-98545061^98546359-,98537572^98544951-98545061^98546359-,98537572^98546359-,98544349^98544442-98544537^98544951-98545061^98546…	1^2-3^4-5^6-,1^2-3^4-5^6-7^8-,1^2-3^4-7^8-,1^2-5^6-7^8-,1^4-5^6-7^8-,1^6-7^8-,1^8-,3^4-5^6-7^8-	8	ENSG00000120802	TMPO	protein_coding	UTR-3	D8.event1463.3	UTR-3	1.09e-05	1	0.116921	0.114929	195.49, 182.88, 177.07, 176.21, 153.73	325.28, 285.7, 273.23, 246.88, 239.66, 200.73	1706.81, 1630.07, 1528.83, 1527.61, 1322.5	2480.09, 2420.94, 2307.42, 2134.55, 2082.12, 1980.74
D2.event12596	4	+	6864183	6871574	D2.event12596.1,D2.event12596.2	,6866192-6866263^	,1-2^	2	ENSG00000170871	KIAA0232	protein_coding	CDS	D2.event12596.1	Known-Coding	1.18e-05	0	0.720213	0.889521	67, 63, 55, 50, 49	54, 53, 40, 37, 35, 32	73, 68, 64.17, 58.94, 54.92	75.36, 70, 53.97, 53.42, 52.97, 42.58
D2.event12596	4	+	6864183	6871574	D2.event12596.1,D2.event12596.2	,6866192-6866263^	,1-2^	2	ENSG00000170871	KIAA0232	protein_coding	CDS	D2.event12596.2	In-Frame-Change	1.18e-05	0	0.279787	0.110479	9.17, 8.94, 6, 5.92, 5	22.36, 17.97, 16.97, 16, 13.42, 10.58	73, 68, 64.17, 58.94, 54.92	75.36, 70, 53.97, 53.42, 52.97, 42.58
ir.D3.event6171	8	-	11847168	11848152	D3.event6171.1,D3.event6171.2,D3.event6171.3	11848067^,11848067^11847822-11847679^,11847679^	1^,1^2-3^,3^	3	ENSG00000164733	CTSB	protein_coding	CDS.DOM	D3.event6171.2	Known-Coding	1.19e-05	3.85e-07	0.960383	0.902148	141.97, 110.55, 108.98, 107.44, 103.76	1882.39, 1788.36, 1742.16, 1638.92, 1539.02, 1483	157.76, 123.4, 120.29, 119.52, 113.61	1954.97, 1874.84, 1807.85, 1704.89, 1609.12, 1537.01
ir.D3.event6171	8	-	11847168	11848152	D3.event6171.1,D3.event6171.2,D3.event6171.3	11848067^,11848067^11847822-11847679^,11847679^	1^,1^2-3^,3^	3	ENSG00000164733	CTSB	protein_coding	CDS.DOM	D3.event6171.3	PTC_50_All	1.19e-05	5.75e-06	0.033604	0.0820455	11.79, 10.54, 9.85, 9.85, 9.85	71.48, 67.1, 60.58, 57.69, 56.97, 38.01	157.76, 123.4, 120.29, 119.52, 113.61	1954.97, 1874.84, 1807.85, 1704.89, 1609.12, 1537.01
ir.D3.event6171	8	-	11847168	11848152	D3.event6171.1,D3.event6171.2,D3.event6171.3	11848067^,11848067^11847822-11847679^,11847679^	1^,1^2-3^,3^	3	ENSG00000164733	CTSB	protein_coding	CDS.DOM	D3.event6171.1	Known-Coding	1.19e-05	0.565626	0.00601311	0.015807	4, 3, 3, 0, 0	16, 15, 12, 9, 8, 3	157.76, 123.4, 120.29, 119.52, 113.61	1954.97, 1874.84, 1807.85, 1704.89, 1609.12, 1537.01
D2.event13377	5	+	83512396	83537007	D2.event13377.1,D2.event13377.2	,83519349-83522309^	,1-2^	2	ENSG00000038427	VCAN	protein_coding	CDS.DOM	D2.event13377.1	Known-Coding	1.25e-05	0	0.739322	0.648685	192, 174.5, 173.5, 167.5, 159	478.5, 450.5, 412, 392, 383, 367	287.92, 271.37, 262, 259.25, 254.8	633.82, 592.36, 582.73, 519.78, 518.72, 510.35
D2.event13377	5	+	83512396	83537007	D2.event13377.1,D2.event13377.2	,83519349-83522309^	,1-2^	2	ENSG00000038427	VCAN	protein_coding	CDS.DOM	D2.event13377.2	Known-Coding	1.25e-05	0	0.260678	0.351315	96.87, 95.92, 95.8, 94.5, 85.75	170.73, 155.32, 152.78, 141.86, 127.35, 126.72	287.92, 271.37, 262, 259.25, 254.8	633.82, 592.36, 582.73, 519.78, 518.72, 510.35
ir.D4.event832	10	-	101792943	101798154	D4.event832.1,D4.event832.3,D4.event832.4	101797980^,101797980^101793998-101793913^,101793913^	1^,1^2-3^,3^	3	ENSG00000198408	MGEA5	protein_coding	CDS	D4.event832.1	Known-Coding	1.28e-05	1.36e-06	0.053391	0.128203	22, 19, 16, 14, 13	13, 12.5, 9.5, 8, 7, 5	146.21, 136.35, 132.82, 121.61, 118.22	198.96, 198.06, 162.65, 162.06, 156.45, 151.96
ir.D4.event832	10	-	101792943	101798154	D4.event832.1,D4.event832.3,D4.event832.4	101797980^,101797980^101793998-101793913^,101793913^	1^,1^2-3^,3^	3	ENSG00000198408	MGEA5	protein_coding	CDS	D4.event832.4	PTC_50_All	1.28e-05	0.393337	0.231949	0.186017	25.22, 25.22, 25.16, 23.37, 22.91	44.7, 43.13, 42.81, 39.04, 35.99, 33.27	146.21, 136.35, 132.82, 121.61, 118.22	198.96, 198.06, 162.65, 162.06, 156.45, 151.96
ir.D4.event832	10	-	101792943	101798154	D4.event832.1,D4.event832.3,D4.event832.4	101797980^,101797980^101793998-101793913^,101793913^	1^,1^2-3^,3^	3	ENSG00000198408	MGEA5	protein_coding	CDS	D4.event832.3	Known-Coding	1.28e-05	1	0.71466	0.68578	99.05, 97.13, 93.91, 80, 79.24	147.83, 140.86, 117.16, 115.79, 112.41, 102.15	146.21, 136.35, 132.82, 121.61, 118.22	198.96, 198.06, 162.65, 162.06, 156.45, 151.96
ir.D6.event5463	5	-	179616126	179617110	D6.event5463.1,D6.event5463.2,D6.event5463.3,D6.event5463.4,D6.event5463.5,D6.event5463.6	,179617060^179616958-179616869^179616218-,179617051^179616958-179616899^179616218-,179617051^179616958-179616869^179616218-,179617021^179616218-,179616869^179616218-	,1^4-6^7-,2^4-5^7-,2^4-6^7-,3^7-,6^7-	6	ENSG00000169045	HNRNPH1	protein_coding	CDS.DOM	D6.event5463.5	Known-Coding	1.42e-05	0.00177	0.0743509	0.0596162	215, 194.5, 190.5, 170.83, 159.17	215.25, 204, 194, 193.17, 192, 167	3401.57, 3195.72, 3072.81, 3000.67, 2927.32	2808.78, 2787.61, 2692.74, 2663.98, 2431.34, 2304.63
ir.D6.event5463	5	-	179616126	179617110	D6.event5463.1,D6.event5463.2,D6.event5463.3,D6.event5463.4,D6.event5463.5,D6.event5463.6	,179617060^179616958-179616869^179616218-,179617051^179616958-179616899^179616218-,179617051^179616958-179616869^179616218-,179617021^179616218-,179616869^179616218-	,1^4-6^7-,2^4-5^7-,2^4-6^7-,3^7-,6^7-	6	ENSG00000169045	HNRNPH1	protein_coding	CDS.DOM	D6.event5463.6	PTC_50_All	1.42e-05	0.02	0.0682726	0.0816445	270.36, 262.63, 260.41, 245.6, 233.25	202.47, 194.36, 193.61, 178.03, 174.24, 129.64	3401.57, 3195.72, 3072.81, 3000.67, 2927.32	2808.78, 2787.61, 2692.74, 2663.98, 2431.34, 2304.63
ir.D6.event5463	5	-	179616126	179617110	D6.event5463.1,D6.event5463.2,D6.event5463.3,D6.event5463.4,D6.event5463.5,D6.event5463.6	,179617060^179616958-179616869^179616218-,179617051^179616958-179616899^179616218-,179617051^179616958-179616869^179616218-,179617021^179616218-,179616869^179616218-	,1^4-6^7-,2^4-5^7-,2^4-6^7-,3^7-,6^7-	6	ENSG00000169045	HNRNPH1	protein_coding	CDS.DOM	D6.event5463.3	Known-Coding	1.42e-05	1	0.175883	0.188965	640.08, 625.86, 597.35, 566.83, 517.99	515.73, 475.38, 470, 453.52, 427.5, 416.5	3401.57, 3195.72, 3072.81, 3000.67, 2927.32	2808.78, 2787.61, 2692.74, 2663.98, 2431.34, 2304.63
ir.D6.event5463	5	-	179616126	179617110	D6.event5463.1,D6.event5463.2,D6.event5463.3,D6.event5463.4,D6.event5463.5,D6.event5463.6	,179617060^179616958-179616869^179616218-,179617051^179616958-179616899^179616218-,179617051^179616958-179616869^179616218-,179617021^179616218-,179616869^179616218-	,1^4-6^7-,2^4-5^7-,2^4-6^7-,3^7-,6^7-	6	ENSG00000169045	HNRNPH1	protein_coding	CDS.DOM	D6.event5463.4	Known-Coding	1.42e-05	1	0.612854	0.598919	2064.32, 1889.25, 1854.67, 1773.68, 1761.42	1715.15, 1683.42, 1657.72, 1651.93, 1456.39, 1450.54	3401.57, 3195.72, 3072.81, 3000.67, 2927.32	2808.78, 2787.61, 2692.74, 2663.98, 2431.34, 2304.63
ir.D6.event5463	5	-	179616126	179617110	D6.event5463.1,D6.event5463.2,D6.event5463.3,D6.event5463.4,D6.event5463.5,D6.event5463.6	,179617060^179616958-179616869^179616218-,179617051^179616958-179616899^179616218-,179617051^179616958-179616869^179616218-,179617021^179616218-,179616869^179616218-	,1^4-6^7-,2^4-5^7-,2^4-6^7-,3^7-,6^7-	6	ENSG00000169045	HNRNPH1	protein_coding	CDS.DOM	D6.event5463.1	PTC_50_All	1.42e-05	1	0.0209205	0.0250344	84.1, 80.96, 76.23, 75.75, 72.05	64.16, 60.82, 58.86, 54.68, 51.31, 38.07	3401.57, 3195.72, 3072.81, 3000.67, 2927.32	2808.78, 2787.61, 2692.74, 2663.98, 2431.34, 2304.63
ir.D6.event5463	5	-	179616126	179617110	D6.event5463.1,D6.event5463.2,D6.event5463.3,D6.event5463.4,D6.event5463.5,D6.event5463.6	,179617060^179616958-179616869^179616218-,179617051^179616958-179616899^179616218-,179617051^179616958-179616869^179616218-,179617021^179616218-,179616869^179616218-	,1^4-6^7-,2^4-5^7-,2^4-6^7-,3^7-,6^7-	6	ENSG00000169045	HNRNPH1	protein_coding	CDS.DOM	D6.event5463.2	Known-Coding	1.42e-05	1	0.0477181	0.0458208	172.51, 148.92, 143.31, 135.97, 114.59	153.2, 143.99, 126.59, 117.95, 110.87, 97.03	3401.57, 3195.72, 3072.81, 3000.67, 2927.32	2808.78, 2787.61, 2692.74, 2663.98, 2431.34, 2304.63
D2.event5942	15	-	68197628	68218536	D2.event5942.1,D2.event5942.2	,68214388-68214290^68211863-68211675^68211318-68211263^68209759-68209637^68208410-68205245^68205151-68205121^	,1-2^3-4^5-6^7-8^9-10^11-12^	2	ENSG00000128973	CLN6	protein_coding	CDS.DOM	D2.event5942.1	Frameshift	1.62e-05	0	0.217184	0.0337841	3, 2, 1, 0, 0	9, 8, 7, 6, 6, 6	41.17, 36.52, 34.49, 34.1, 32.92	35.72, 33.63, 32.92, 32.36, 31.61, 28.42
D2.event5942	15	-	68197628	68218536	D2.event5942.1,D2.event5942.2	,68214388-68214290^68211863-68211675^68211318-68211263^68209759-68209637^68208410-68205245^68205151-68205121^	,1-2^3-4^5-6^7-8^9-10^11-12^	2	ENSG00000128973	CLN6	protein_coding	CDS.DOM	D2.event5942.2	PTC_50_All	1.62e-05	0	0.782816	0.966216	40.17, 34.52, 34.49, 34.1, 29.92	29.72, 27.63, 25.36, 24.92, 22.61, 22.42	41.17, 36.52, 34.49, 34.1, 32.92	35.72, 33.63, 32.92, 32.36, 31.61, 28.42
D2.event9244	2	+	11773745	11779519	D2.event9244.1,D2.event9244.2	,11776086-11776193^	,1-2^	2	ENSG00000134324	LPIN1	protein_coding	CDS	D2.event9244.1	Known-Coding	1.8e-05	0	0.876028	0.698239	78, 63, 59, 54, 49	84, 79, 73, 65, 50, 47	111.74, 85.98, 83.78, 76.46, 75.97	93.17, 88.17, 81.88, 78.92, 57.82, 54.24
D2.event9244	2	+	11773745	11779519	D2.event9244.1,D2.event9244.2	,11776086-11776193^	,1-2^	2	ENSG00000134324	LPIN1	protein_coding	CDS	D2.event9244.2	Known-Coding	1.8e-05	0	0.123972	0.301761	33.74, 31.98, 27.46, 20.78, 16.97	16.88, 10.82, 9.17, 9.17, 5.92, 4.24	111.74, 85.98, 83.78, 76.46, 75.97	93.17, 88.17, 81.88, 78.92, 57.82, 54.24
D3.event13214	4	-	186589220	186595689	D3.event13214.1,D3.event13214.3	,186590403-186590368^	,1-2^	2	ENSG00000083857	FAT1	protein_coding	CDS	D3.event13214.1	Known-Coding	1.81e-05	0	0.75574	0.906778	53, 48, 45, 36.5, 29	109, 105, 88, 82, 79, 76.5	58.48, 50.45, 49.24, 40.97, 34	144.33, 132.93, 114.93, 112.5, 111, 97.95
D3.event13214	4	-	186589220	186595689	D3.event13214.1,D3.event13214.3	,186590403-186590368^	,1-2^	2	ENSG00000083857	FAT1	protein_coding	CDS	D3.event13214.3	Known-Coding	1.81e-05	0	0.24426	0.093222	5.48, 5, 4.47, 4.24, 2.45	35.33, 32, 30.5, 27.93, 26.93, 21.45	58.48, 50.45, 49.24, 40.97, 34	144.33, 132.93, 114.93, 112.5, 111, 97.95
ir.D3.event3021	17	-	50974771	50977221	D3.event3021.1,D3.event3021.2,D3.event3021.3	,50977108^50975901-50975863^50974947-,50977108^50974947-	,1^2-3^4-,1^4-	3	ENSG00000008294	SPAG9	protein_coding	CDS	D3.event3021.2	Known-Coding	2.43e-05	1e-06	0.396448	0.251191	34.99, 31.02, 28.39, 23.37, 22.45	53.92, 48.06, 46.96, 42.58, 37.47, 34.41	119.39, 119.02, 115.99, 109.37, 94.45	133.92, 124.96, 103.58, 103.06, 99.47, 99.41
ir.D3.event3021	17	-	50974771	50977221	D3.event3021.1,D3.event3021.2,D3.event3021.3	,50977108^50975901-50975863^50974947-,50977108^50974947-	,1^2-3^4-,1^4-	3	ENSG00000008294	SPAG9	protein_coding	CDS	D3.event3021.3	Known-Coding	2.43e-05	0.000178079	0.498194	0.62341	79, 73, 71, 66, 59	65, 64, 54, 52, 51, 45	119.39, 119.02, 115.99, 109.37, 94.45	133.92, 124.96, 103.58, 103.06, 99.47, 99.41
ir.D3.event3021	17	-	50974771	50977221	D3.event3021.1,D3.event3021.2,D3.event3021.3	,50977108^50975901-50975863^50974947-,50977108^50974947-	,1^2-3^4-,1^4-	3	ENSG00000008294	SPAG9	protein_coding	CDS	D3.event3021.1	PTC_50_All	2.43e-05	1	0.105358	0.125399	15, 15, 15, 13, 12	15, 14, 11, 10, 10, 10	119.39, 119.02, 115.99, 109.37, 94.45	133.92, 124.96, 103.58, 103.06, 99.47, 99.41
D5.event4244	12	-	76060279	76084567	D5.event4244.1,D5.event4244.2,D5.event4244.3,D5.event4244.4,D5.event4244.5	,76074239-76074203^,76074239-76074203^76068994-76068909^76067473-76067371^,76068994-76068909^76067473-76067371^,76067473-76067371^	,1-2^,1-2^3-4^5-6^,3-4^5-6^,5-6^	5	ENSG00000187109	NAP1L1	protein_coding	CDS	D5.event4244.5	Known-Coding	2.61e-05	0.00638	0.0635731	0.0858714	192.48, 138.76, 131.38, 127.42, 122.67	130.54, 103.18, 103.18, 93.15, 84.17, 64.3	1878.74, 1640.28, 1630.36, 1572.48, 1550.03	1680.22, 1584.2, 1502.33, 1483.36, 1453.08, 1350.33
D5.event4244	12	-	76060279	76084567	D5.event4244.1,D5.event4244.2,D5.event4244.3,D5.event4244.4,D5.event4244.5	,76074239-76074203^,76074239-76074203^76068994-76068909^76067473-76067371^,76068994-76068909^76067473-76067371^,76067473-76067371^	,1-2^,1-2^3-4^5-6^,3-4^5-6^,5-6^	5	ENSG00000187109	NAP1L1	protein_coding	CDS	D5.event4244.2	Known-Coding	2.61e-05	0.0106777	0.120276	0.0948908	186, 159.95, 159.34, 144.32, 134.49	197.28, 191.98, 185.4, 181.79, 171.44, 158.33	1878.74, 1640.28, 1630.36, 1572.48, 1550.03	1680.22, 1584.2, 1502.33, 1483.36, 1453.08, 1350.33
D5.event4244	12	-	76060279	76084567	D5.event4244.1,D5.event4244.2,D5.event4244.3,D5.event4244.4,D5.event4244.5	,76074239-76074203^,76074239-76074203^76068994-76068909^76067473-76067371^,76068994-76068909^76067473-76067371^,76067473-76067371^	,1-2^,1-2^3-4^5-6^,3-4^5-6^,5-6^	5	ENSG00000187109	NAP1L1	protein_coding	CDS	D5.event4244.4	Known-Coding	2.61e-05	0.734313	0.151085	0.170676	302.84, 298.57, 283.48, 263.9, 260.69	272.75, 249.21, 237.62, 229.9, 190.38, 189.87	1878.74, 1640.28, 1630.36, 1572.48, 1550.03	1680.22, 1584.2, 1502.33, 1483.36, 1453.08, 1350.33
D5.event4244	12	-	76060279	76084567	D5.event4244.1,D5.event4244.2,D5.event4244.3,D5.event4244.4,D5.event4244.5	,76074239-76074203^,76074239-76074203^76068994-76068909^76067473-76067371^,76068994-76068909^76067473-76067371^,76067473-76067371^	,1-2^,1-2^3-4^5-6^,3-4^5-6^,5-6^	5	ENSG00000187109	NAP1L1	protein_coding	CDS	D5.event4244.1	Known-Coding	2.61e-05	0.985095	0.00763782	0.00412683	10, 10, 6, 4, 3	16, 13, 12, 10, 9, 7	1878.74, 1640.28, 1630.36, 1572.48, 1550.03	1680.22, 1584.2, 1502.33, 1483.36, 1453.08, 1350.33
D5.event4244	12	-	76060279	76084567	D5.event4244.1,D5.event4244.2,D5.event4244.3,D5.event4244.4,D5.event4244.5	,76074239-76074203^,76074239-76074203^76068994-76068909^76067473-76067371^,76068994-76068909^76067473-76067371^,76067473-76067371^	,1-2^,1-2^3-4^5-6^,3-4^5-6^,5-6^	5	ENSG00000187109	NAP1L1	protein_coding	CDS	D5.event4244.3	Known-Coding	2.61e-05	1	0.657428	0.644435	1210.78, 1079.01, 1041.44, 1017.07, 984.3	1112.5, 1036.32, 1011.88, 954.98, 945, 891.37	1878.74, 1640.28, 1630.36, 1572.48, 1550.03	1680.22, 1584.2, 1502.33, 1483.36, 1453.08, 1350.33
ir.D3.event4718	3	+	186784564	186786051	D3.event4718.1,D3.event4718.2,D3.event4718.3	,186784696^186784962-186785101^186785883-,186784696^186785883-	,1^2-3^4-,1^4-	3	ENSG00000156976	EIF4A2	protein_coding	CDS.DOM	D3.event4718.2	Known-Coding	3.13e-05	2.58e-06	0.55756	0.482591	286.75, 279.91, 251.11, 246.69, 245.85	413.2, 382, 320.37, 319.99, 314.46, 294.95	575.56, 570.88, 538.81, 526.95, 502.35	702.7, 696.07, 601.56, 570.02, 566.32, 530.27
ir.D3.event4718	3	+	186784564	186786051	D3.event4718.1,D3.event4718.2,D3.event4718.3	,186784696^186784962-186785101^186785883-,186784696^186785883-	,1^2-3^4-,1^4-	3	ENSG00000156976	EIF4A2	protein_coding	CDS.DOM	D3.event4718.1	PTC_50_All	3.13e-05	0.00271	0.184725	0.228276	127.12, 126.81, 125.5, 123.97, 115.84	136.7, 123.19, 115.37, 104.03, 103.87, 93.81	575.56, 570.88, 538.81, 526.95, 502.35	702.7, 696.07, 601.56, 570.02, 566.32, 530.27
ir.D3.event4718	3	+	186784564	186786051	D3.event4718.1,D3.event4718.2,D3.event4718.3	,186784696^186784962-186785101^186785883-,186784696^186785883-	,1^2-3^4-,1^4-	3	ENSG00000156976	EIF4A2	protein_coding	CDS.DOM	D3.event4718.3	Known-Coding	3.13e-05	0.220702	0.257716	0.289133	167, 165, 162, 160, 131	184, 179, 158, 156, 146, 122	575.56, 570.88, 538.81, 526.95, 502.35	702.7, 696.07, 601.56, 570.02, 566.32, 530.27
D2.event3921	12	+	131714071	131714822	D2.event3921.1,D2.event3921.2	131714193^,131714240^	1^,2^	2	ENSG00000061936	SFSWAP	protein_coding	CDS.DOM	D2.event3921.2	Known-Coding	3.31e-05	0	0.890562	0.732371	49, 46.5, 41, 34, 32	62.5, 61, 53, 47, 42, 36	68, 64.5, 58, 44, 42	70.5, 68, 60, 53, 44, 43
D2.event3921	12	+	131714071	131714822	D2.event3921.1,D2.event3921.2	131714193^,131714240^	1^,2^	2	ENSG00000061936	SFSWAP	protein_coding	CDS.DOM	D2.event3921.1	Known-Coding	3.31e-05	0	0.109438	0.267629	19, 18, 17, 10, 10	8, 7, 7, 7, 6, 2	68, 64.5, 58, 44, 42	70.5, 68, 60, 53, 44, 43
D2.event6692	16	-	57758909	57759728	D2.event6692.1,D2.event6692.2	,57759153-57759125^	,1-2^	2	ENSG00000140859	KIFC3	protein_coding	CDS	D2.event6692.1	Known-Coding	3.5e-05	0	0.601945	0.815696	48, 41, 35, 35, 31	28, 22, 22, 21, 19, 13	60.96, 50.49, 41.48, 41, 39	46.97, 38.49, 35.86, 32.39, 29.95, 24
D2.event6692	16	-	57758909	57759728	D2.event6692.1,D2.event6692.2	,57759153-57759125^	,1-2^	2	ENSG00000140859	KIFC3	protein_coding	CDS	D2.event6692.2	Known-Coding	3.5e-05	0	0.398055	0.184304	12.96, 9.49, 8, 6.48, 6	18.97, 17.49, 13.86, 11, 10.95, 10.39	60.96, 50.49, 41.48, 41, 39	46.97, 38.49, 35.86, 32.39, 29.95, 24
D2.event8514	19	+	38727103	38728996	D2.event8514.1,D2.event8514.2	38727946-38728026^,38728316-38728381^	1-2^,3-4^	2	ENSG00000130402	ACTN4	protein_coding	CDS.DOM	D2.event8514.2	Known-Coding	3.5e-05	0	0.0569472	0.12752	29.39, 17.15, 15.97, 14.97, 13.86	13.23, 12.49, 12.49, 12.41, 9.38, 8	172.74, 149.39, 136.58, 134.39, 122.18	252.84, 231.22, 197.16, 180.1, 177.42, 162.41
D2.event8514	19	+	38727103	38728996	D2.event8514.1,D2.event8514.2	38727946-38728026^,38728316-38728381^	1-2^,3-4^	2	ENSG00000130402	ACTN4	protein_coding	CDS.DOM	D2.event8514.1	Known-Coding	3.5e-05	0	0.943053	0.87248	143.35, 133.42, 122.72, 117.24, 107.21	240.35, 217.99, 184.67, 172.1, 168.04, 150	172.74, 149.39, 136.58, 134.39, 122.18	252.84, 231.22, 197.16, 180.1, 177.42, 162.41
D3.event11087	21	-	43095743	43104315	D3.event11087.1,D3.event11087.2,D3.event11087.3	43101432-43101366^,43101432-43101366^43100519-43100453^,43100519-43100453^	1-2^,1-2^3-4^,3-4^	3	ENSG00000160201	U2AF1	protein_coding	CDS.DOM	D3.event11087.1	Known-Coding	3.62e-05	5.05e-06	0.243552	0.181991	105, 88.86, 85.69, 84.95, 72.44	115.22, 110.74, 109.17, 96.5, 90.37, 84.52	584.32, 491.22, 460.93, 441.89, 423.07	465.74, 458.02, 403.31, 401.58, 391.23, 370.48
D3.event11087	21	-	43095743	43104315	D3.event11087.1,D3.event11087.2,D3.event11087.3	43101432-43101366^,43101432-43101366^43100519-43100453^,43100519-43100453^	1-2^,1-2^3-4^,3-4^	3	ENSG00000160201	U2AF1	protein_coding	CDS.DOM	D3.event11087.3	Known-Coding	3.62e-05	4.04e-05	0.610666	0.676936	404.45, 324.02, 314.39, 291.71, 291.28	290.55, 268.66, 251.98, 244.57, 237.16, 227.85	584.32, 491.22, 460.93, 441.89, 423.07	465.74, 458.02, 403.31, 401.58, 391.23, 370.48
D3.event11087	21	-	43095743	43104315	D3.event11087.1,D3.event11087.2,D3.event11087.3	43101432-43101366^,43101432-43101366^43100519-43100453^,43100519-43100453^	1-2^,1-2^3-4^,3-4^	3	ENSG00000160201	U2AF1	protein_coding	CDS.DOM	D3.event11087.2	Known-NMD	3.62e-05	1	0.145782	0.141073	78.34, 74.87, 64.92, 61.59, 58.92	80.19, 59.97, 58.11, 56.29, 55.41, 53.1	584.32, 491.22, 460.93, 441.89, 423.07	465.74, 458.02, 403.31, 401.58, 391.23, 370.48
D2.event7728	17	-	50974947	50977108	D2.event7728.1,D2.event7728.2	,50975901-50975863^	,1-2^	2	ENSG00000008294	SPAG9	protein_coding	CDS	D2.event7728.1	Known-Coding	3.62e-05	0	0.556871	0.713336	79, 73, 71, 66, 59	65, 64, 54, 52, 51, 45	107.39, 103.59, 100.99, 94.37, 81.45	118.92, 110.96, 93.58, 93.06, 89.47, 88.41
D2.event7728	17	-	50974947	50977108	D2.event7728.1,D2.event7728.2	,50975901-50975863^	,1-2^	2	ENSG00000008294	SPAG9	protein_coding	CDS	D2.event7728.2	Known-Coding	3.62e-05	0	0.443129	0.286664	34.99, 30.59, 28.39, 23.37, 22.45	53.92, 48.06, 46.96, 42.58, 37.47, 34.41	107.39, 103.59, 100.99, 94.37, 81.45	118.92, 110.96, 93.58, 93.06, 89.47, 88.41
D2.event11618	3	+	41239354	41240443	D2.event11618.1,D2.event11618.2	41239660-,41239819-	1-,2-	2	ENSG00000168036	CTNNB1	protein_coding	UTR-3	D2.event11618.1	UTR-3	3.62e-05	0	0.41113	0.350924	359, 336, 283, 275, 255	435, 424.5, 418, 398, 362, 330	985.5, 920.5, 824, 815, 748.5	1020, 1012, 1003.5, 928, 917, 874.5
D2.event11618	3	+	41239354	41240443	D2.event11618.1,D2.event11618.2	41239660-,41239819-	1-,2-	2	ENSG00000168036	CTNNB1	protein_coding	UTR-3	D2.event11618.2	UTR-3	3.62e-05	0	0.58887	0.649076	626.5, 584.5, 541, 540, 493.5	594, 585, 579, 566, 544.5, 519	985.5, 920.5, 824, 815, 748.5	1020, 1012, 1003.5, 928, 917, 874.5
D4.event86	1	+	16367308	16393482	D4.event86.1,D4.event86.2,D4.event86.3,D4.event86.4	16391375-16391424^16393228-,16391375-16391424^16393231-,16393228-,16393231-	1-2^3-,1-2^4-,3-,4-	4	ENSG00000055070	SZRD1	protein_coding	CDS.DOM	D4.event86.1	Known-Coding	3.65e-05	7.32e-05	0.144508	0.225216	57.45, 46.96, 45.9, 41.83, 38.88	31.98, 30.09, 25.3, 24.98, 22.45, 18.97	231.94, 219.32, 193.18, 193.05, 188.29	196.96, 182.4, 179.18, 176.4, 171.4, 157.79
D4.event86	1	+	16367308	16393482	D4.event86.1,D4.event86.2,D4.event86.3,D4.event86.4	16391375-16391424^16393228-,16391375-16391424^16393231-,16393228-,16393231-	1-2^3-,1-2^4-,3-,4-	4	ENSG00000055070	SZRD1	protein_coding	CDS.DOM	D4.event86.4	Known-Coding	3.65e-05	0.00850459	0.342995	0.26904	66, 64, 50, 50, 46	70, 68, 60, 58, 57, 52	231.94, 219.32, 193.18, 193.05, 188.29	196.96, 182.4, 179.18, 176.4, 171.4, 157.79
D4.event86	1	+	16367308	16393482	D4.event86.1,D4.event86.2,D4.event86.3,D4.event86.4	16391375-16391424^16393228-,16391375-16391424^16393231-,16393228-,16393231-	1-2^3-,1-2^4-,3-,4-	4	ENSG00000055070	SZRD1	protein_coding	CDS.DOM	D4.event86.2	Known-Coding	3.65e-05	1	0.082098	0.106058	27.28, 22.49, 22.49, 18.33, 18.17	20.2, 16.43, 15.87, 14.42, 10.95, 9.49	231.94, 219.32, 193.18, 193.05, 188.29	196.96, 182.4, 179.18, 176.4, 171.4, 157.79
D4.event86	1	+	16367308	16393482	D4.event86.1,D4.event86.2,D4.event86.3,D4.event86.4	16391375-16391424^16393228-,16391375-16391424^16393231-,16393228-,16393231-	1-2^3-,1-2^4-,3-,4-	4	ENSG00000055070	SZRD1	protein_coding	CDS.DOM	D4.event86.3	Known-Coding	3.65e-05	1	0.430399	0.399686	91, 90, 86, 73, 70	83, 83, 79, 73, 71, 69	231.94, 219.32, 193.18, 193.05, 188.29	196.96, 182.4, 179.18, 176.4, 171.4, 157.79
ir.D3.event3182	18	-	49491532	49492458	D3.event3182.1,D3.event3182.2,D3.event3182.3	49491833-,49491833-49491736^49491584-,49491584-	1-,1-2^3-,3-	3	ENSG00000265681	RPL17	protein_coding	UTR-5	D3.event3182.3	UTR-5	4.21e-05	4.26e-06	0.849905	0.892414	627.08, 589, 551, 512.5, 490	590, 556.5, 537.5, 490.2, 474.5, 471	689.4, 670.4, 620.85, 565.68, 557.08	704.05, 654.4, 641.09, 561.1, 558.88, 551.13
ir.D3.event3182	18	-	49491532	49492458	D3.event3182.1,D3.event3182.2,D3.event3182.3	49491833-,49491833-49491736^49491584-,49491584-	1-,1-2^3-,3-	3	ENSG00000265681	RPL17	protein_coding	UTR-5	D3.event3182.2	UTR-5	4.21e-05	0.000919798	0.057549	0.0365589	27.57, 24.1, 21.98, 21.33, 18.44	43.53, 39.92, 36.21, 34.68, 32.35, 24.54	689.4, 670.4, 620.85, 565.68, 557.08	704.05, 654.4, 641.09, 561.1, 558.88, 551.13
ir.D3.event3182	18	-	49491532	49492458	D3.event3182.1,D3.event3182.2,D3.event3182.3	49491833-,49491833-49491736^49491584-,49491584-	1-,1-2^3-,3-	3	ENSG00000265681	RPL17	protein_coding	UTR-5	D3.event3182.1	UTR-5	4.21e-05	0.023591	0.0925461	0.0710269	53.83, 45.75, 45.75, 40.34, 34.74	70.52, 63.67, 61.69, 53.2, 46.36, 44.28	689.4, 670.4, 620.85, 565.68, 557.08	704.05, 654.4, 641.09, 561.1, 558.88, 551.13
ir.D6.event3566	19	-	49355206	49357252	D6.event3566.1,D6.event3566.2,D6.event3566.3,D6.event3566.4,D6.event3566.5,D6.event3566.6	,49355970-49355959^49355419-49355312^,49355970-49355959^49355419-49355303^,49355970-49355312^,49355419-49355312^,49355419-49355303^	,1-2^3-4^,1-2^3-5^,1-4^,3-4^,3-5^	6	ENSG00000074219	TEAD2	protein_coding	CDS.DOM	D6.event3566.5	Known-Coding	4.39e-05	0.00196	0.373775	0.426825	284.14, 251.22, 242.74, 233.69, 226.63	222.71, 205.67, 188.39, 175.82, 173.94, 170.93	668.16, 587.07, 550.75, 550.06, 545.43	562.78, 540.05, 538.65, 492.43, 465.27, 443.99
ir.D6.event3566	19	-	49355206	49357252	D6.event3566.1,D6.event3566.2,D6.event3566.3,D6.event3566.4,D6.event3566.5,D6.event3566.6	,49355970-49355959^49355419-49355312^,49355970-49355959^49355419-49355303^,49355970-49355312^,49355419-49355312^,49355419-49355303^	,1-2^3-4^,1-2^3-5^,1-4^,3-4^,3-5^	6	ENSG00000074219	TEAD2	protein_coding	CDS.DOM	D6.event3566.1	Known-Coding	4.39e-05	0.183	0.115669	0.0920223	60, 59, 52, 52, 44	78, 60, 58, 55, 54, 47	668.16, 587.07, 550.75, 550.06, 545.43	562.78, 540.05, 538.65, 492.43, 465.27, 443.99
ir.D6.event3566	19	-	49355206	49357252	D6.event3566.1,D6.event3566.2,D6.event3566.3,D6.event3566.4,D6.event3566.5,D6.event3566.6	,49355970-49355959^49355419-49355312^,49355970-49355959^49355419-49355303^,49355970-49355312^,49355419-49355312^,49355419-49355303^	,1-2^3-4^,1-2^3-5^,1-4^,3-4^,3-5^	6	ENSG00000074219	TEAD2	protein_coding	CDS.DOM	D6.event3566.2	Known-Coding	4.39e-05	0.193008	0.157888	0.130785	94.53, 77.02, 75.48, 69.65, 62.79	92.08, 82.35, 82.35, 79.47, 75.57, 68.66	668.16, 587.07, 550.75, 550.06, 545.43	562.78, 540.05, 538.65, 492.43, 465.27, 443.99
ir.D6.event3566	19	-	49355206	49357252	D6.event3566.1,D6.event3566.2,D6.event3566.3,D6.event3566.4,D6.event3566.5,D6.event3566.6	,49355970-49355959^49355419-49355312^,49355970-49355959^49355419-49355303^,49355970-49355312^,49355419-49355312^,49355419-49355303^	,1-2^3-4^,1-2^3-5^,1-4^,3-4^,3-5^	6	ENSG00000074219	TEAD2	protein_coding	CDS.DOM	D6.event3566.3	Known-Coding	4.39e-05	0.782069	0.098966	0.0810727	57.16, 48.63, 46.29, 45.64, 37.51	54.73, 54.05, 52.78, 50.36, 44.66, 44.59	668.16, 587.07, 550.75, 550.06, 545.43	562.78, 540.05, 538.65, 492.43, 465.27, 443.99
ir.D6.event3566	19	-	49355206	49357252	D6.event3566.1,D6.event3566.2,D6.event3566.3,D6.event3566.4,D6.event3566.5,D6.event3566.6	,49355970-49355959^49355419-49355312^,49355970-49355959^49355419-49355303^,49355970-49355312^,49355419-49355312^,49355419-49355303^	,1-2^3-4^,1-2^3-5^,1-4^,3-4^,3-5^	6	ENSG00000074219	TEAD2	protein_coding	CDS.DOM	D6.event3566.6	Known-Coding	4.39e-05	0.916021	0.185442	0.208098	133.62, 120.64, 120.19, 117.26, 112.08	102.06, 98.36, 97.57, 96.67, 92, 77.67	668.16, 587.07, 550.75, 550.06, 545.43	562.78, 540.05, 538.65, 492.43, 465.27, 443.99
ir.D6.event3566	19	-	49355206	49357252	D6.event3566.1,D6.event3566.2,D6.event3566.3,D6.event3566.4,D6.event3566.5,D6.event3566.6	,49355970-49355959^49355419-49355312^,49355970-49355959^49355419-49355303^,49355970-49355312^,49355419-49355312^,49355419-49355303^	,1-2^3-4^,1-2^3-5^,1-4^,3-4^,3-5^	6	ENSG00000074219	TEAD2	protein_coding	CDS.DOM	D6.event3566.4	PTC_50_All	4.39e-05	1	0.0682611	0.0611966	46.71, 35.94, 33.44, 31.32, 30.15	43.31, 40.46, 33.2, 32.4, 30.2, 28.16	668.16, 587.07, 550.75, 550.06, 545.43	562.78, 540.05, 538.65, 492.43, 465.27, 443.99
ir.D4.event4916	3	-	170868013	170870159	D4.event4916.1,D4.event4916.2,D4.event4916.3,D4.event4916.4	170868390-,170868390-170868298^170868201-,170868390-170868298^170868134-,170868387-170868298^170868134-	1-,1-3^4-,1-3^5-,2-3^5-	4	ENSG00000163584	RPL22L1	protein_coding	CDS.DOM	D4.event4916.1	PTC_50_All	4.39e-05	0.00500809	0.0507547	0.0910978	18.84, 17.61, 13.86, 10.95, 10.77	25.14, 23.83, 22.38, 18.33, 12.08, 11.4	188.08, 178.46, 152.29, 139.28, 132.94	415.32, 394.71, 390.74, 360.23, 336.11, 329.88
ir.D4.event4916	3	-	170868013	170870159	D4.event4916.1,D4.event4916.2,D4.event4916.3,D4.event4916.4	170868390-,170868390-170868298^170868201-,170868390-170868298^170868134-,170868387-170868298^170868134-	1-,1-3^4-,1-3^5-,2-3^5-	4	ENSG00000163584	RPL22L1	protein_coding	CDS.DOM	D4.event4916.2	Known-NMD	4.39e-05	0.0276	0.198518	0.257726	47.67, 41.67, 39.19, 37.95, 37.31	85.72, 76.68, 76.3, 69.35, 67.69, 66.18	188.08, 178.46, 152.29, 139.28, 132.94	415.32, 394.71, 390.74, 360.23, 336.11, 329.88
ir.D4.event4916	3	-	170868013	170870159	D4.event4916.1,D4.event4916.2,D4.event4916.3,D4.event4916.4	170868390-,170868390-170868298^170868201-,170868390-170868298^170868134-,170868387-170868298^170868134-	1-,1-3^4-,1-3^5-,2-3^5-	4	ENSG00000163584	RPL22L1	protein_coding	CDS.DOM	D4.event4916.3	Known-Coding	4.39e-05	0.173	0.571837	0.512621	96.07, 87.68, 84.5, 76.92, 60.4	226.8, 225.99, 224.15, 208.94, 201.52, 185.96	188.08, 178.46, 152.29, 139.28, 132.94	415.32, 394.71, 390.74, 360.23, 336.11, 329.88
ir.D4.event4916	3	-	170868013	170870159	D4.event4916.1,D4.event4916.2,D4.event4916.3,D4.event4916.4	170868390-,170868390-170868298^170868201-,170868390-170868298^170868134-,170868387-170868298^170868134-	1-,1-3^4-,1-3^5-,2-3^5-	4	ENSG00000163584	RPL22L1	protein_coding	CDS.DOM	D4.event4916.4	Known-Coding	4.39e-05	0.172757	0.17889	0.138554	31.5, 25.5, 19.49, 18.89, 14.28	80.42, 77.73, 69.74, 63.17, 58.58, 48.91	188.08, 178.46, 152.29, 139.28, 132.94	415.32, 394.71, 390.74, 360.23, 336.11, 329.88
D2.event9125	19	-	49355419	49357252	D2.event9125.1,D2.event9125.2	,49355970-49355959^	,1-2^	2	ENSG00000074219	TEAD2	protein_coding	CDS	D2.event9125.1	Known-Coding	5.7e-05	0	0.792894	0.861903	316, 297, 267.5, 259, 257	248, 225, 210, 188.5, 188.5, 184	373.5, 341.99, 309.45, 303.37, 291.98	309.99, 279.5, 266.99, 243.94, 240.81, 227.43
D2.event9125	19	-	49355419	49357252	D2.event9125.1,D2.event9125.2	,49355970-49355959^	,1-2^	2	ENSG00000074219	TEAD2	protein_coding	CDS	D2.event9125.2	Known-Coding	5.7e-05	0	0.207106	0.138097	57.5, 46.37, 44.99, 41.95, 32.98	61.99, 56.99, 55.44, 54.5, 52.31, 43.43	373.5, 341.99, 309.45, 303.37, 291.98	309.99, 279.5, 266.99, 243.94, 240.81, 227.43
ir.D3.event6364	9	+	133350240	133351071	D3.event6364.1,D3.event6364.2,D3.event6364.3	133350319^133350597-,133350319^133350597-133350727^133351002-,133350727^133351002-	1^2-,1^2-3^4-,3^4-	3	ENSG00000148303	RPL7A	protein_coding	CDS.DOM	D3.event6364.3	PTC_50_All	6.2e-05	3.05e-06	0.105177	0.0810101	862.49, 845, 702.38, 683.48, 681.01	962.68, 920.75, 902.76, 886.44, 831.66, 767.52	10044.36, 9388.77, 9127.87, 9036.37, 8968.27	9272.92, 8896.26, 8384.36, 8084.54, 7933.32, 7647.61
ir.D3.event6364	9	+	133350240	133351071	D3.event6364.1,D3.event6364.2,D3.event6364.3	133350319^133350597-,133350319^133350597-133350727^133351002-,133350727^133351002-	1^2-,1^2-3^4-,3^4-	3	ENSG00000148303	RPL7A	protein_coding	CDS.DOM	D3.event6364.2	Known-Coding	6.2e-05	0.000464971	0.861088	0.883306	8987.38, 8411.33, 8098.92, 7883.09, 7760.12	8026.89, 7691.96, 7186.27, 6967.3, 6781.42, 6603.18	10044.36, 9388.77, 9127.87, 9036.37, 8968.27	9272.92, 8896.26, 8384.36, 8084.54, 7933.32, 7647.61
ir.D3.event6364	9	+	133350240	133351071	D3.event6364.1,D3.event6364.2,D3.event6364.3	133350319^133350597-,133350319^133350597-133350727^133351002-,133350727^133351002-	1^2-,1^2-3^4-,3^4-	3	ENSG00000148303	RPL7A	protein_coding	CDS.DOM	D3.event6364.1	PTC_50_All	6.2e-05	1	0.0337354	0.0356836	354.6, 345.66, 345.47, 308.28, 296.43	359.59, 285.58, 283.55, 276.91, 249.14, 235.41	10044.36, 9388.77, 9127.87, 9036.37, 8968.27	9272.92, 8896.26, 8384.36, 8084.54, 7933.32, 7647.61
D2.event6764	16	-	71765584	71769623	D2.event6764.1,D2.event6764.2	,71767885-71767877^	,1-2^	2	ENSG00000166747	AP1G1	protein_coding	CDS.DOM	D2.event6764.1	Known-Coding	7.22e-05	0	0.456794	0.610768	94.5, 87.33, 84.5, 70, 70	81.5, 75.5, 64.33, 63, 51, 46	153.21, 148.15, 124.77, 123.49, 116.43	172.24, 153.49, 145.74, 126.99, 125.76, 109.48
D2.event6764	16	-	71765584	71769623	D2.event6764.1,D2.event6764.2	,71767885-71767877^	,1-2^	2	ENSG00000166747	AP1G1	protein_coding	CDS.DOM	D2.event6764.2	Known-Coding	7.22e-05	0	0.543206	0.389232	68.71, 54.77, 53.65, 46.43, 36.16	90.74, 89.16, 74.76, 70.24, 63.99, 63.48	153.21, 148.15, 124.77, 123.49, 116.43	172.24, 153.49, 145.74, 126.99, 125.76, 109.48
D3.event9227	2	+	272037	276980	D3.event9227.1,D3.event9227.2,D3.event9227.3	272065^272192-272305^275140-275201^,272150^,272150^275140-275201^	1^3-4^5-6^,2^,2^5-6^	3	ENSG00000143727	ACP1	protein_coding	CDS.DOM	D3.event9227.3	Known-Coding	7.22e-05	0	0.839083	0.787051	445.21, 392.15, 385.9, 372.44, 366.82	539.5, 536.57, 512.07, 496.29, 463.43, 411.84	575.82, 500.49, 498.2, 470.12, 464.41	643.15, 642.29, 611.01, 594.6, 558.08, 498.7
D3.event9227	2	+	272037	276980	D3.event9227.1,D3.event9227.2,D3.event9227.3	272065^272192-272305^275140-275201^,272150^,272150^275140-275201^	1^3-4^5-6^,2^,2^5-6^	3	ENSG00000143727	ACP1	protein_coding	CDS.DOM	D3.event9227.1	Known-NMD	7.22e-05	0	0.160917	0.212949	128.11, 108.3, 106.34, 94.68, 93.59	103.72, 97.65, 95.94, 95.31, 90.65, 83.86	575.82, 500.49, 498.2, 470.12, 464.41	643.15, 642.29, 611.01, 594.6, 558.08, 498.7
ir.D4.event5866	7	+	26202971	26208555	D4.event5866.1,D4.event5866.2,D4.event5866.3,D4.event5866.4	26203022^26206368-,26203022^26206368-26206510^26208393-,26203022^26206368-26206510^26208466-,26206510^26208393-	1^2-,1^2-3^4-,1^2-3^5-,3^4-	4	ENSG00000122565	CBX3	protein_coding	CDS.DOM	D4.event5866.3	Known-Coding	7.34e-05	3.09e-06	0.149056	0.181252	374.23, 357.96, 333.7, 333.14, 321.09	230.71, 206.95, 187.62, 187.59, 181.24, 167.71	2082.42, 1943.21, 1858.19, 1812.9, 1794.52	1472.64, 1377.24, 1373.16, 1232.16, 1184.96, 1154.59
ir.D4.event5866	7	+	26202971	26208555	D4.event5866.1,D4.event5866.2,D4.event5866.3,D4.event5866.4	26203022^26206368-,26203022^26206368-26206510^26208393-,26203022^26206368-26206510^26208466-,26206510^26208393-	1^2-,1^2-3^4-,1^2-3^5-,3^4-	4	ENSG00000122565	CBX3	protein_coding	CDS.DOM	D4.event5866.2	Known-Coding	7.34e-05	0.000750107	0.693697	0.661546	1401.62, 1303.4, 1205.79, 1194.51, 1174.54	1012.59, 987.51, 940.72, 846.47, 812.67, 807.6	2082.42, 1943.21, 1858.19, 1812.9, 1794.52	1472.64, 1377.24, 1373.16, 1232.16, 1184.96, 1154.59
ir.D4.event5866	7	+	26202971	26208555	D4.event5866.1,D4.event5866.2,D4.event5866.3,D4.event5866.4	26203022^26206368-,26203022^26206368-26206510^26208393-,26203022^26206368-26206510^26208466-,26206510^26208393-	1^2-,1^2-3^4-,1^2-3^5-,3^4-	4	ENSG00000122565	CBX3	protein_coding	CDS.DOM	D4.event5866.1	PTC_50_All	7.34e-05	1	0.0807591	0.0787832	151.94, 151.36, 149.09, 148.12, 146.79	122.23, 109.78, 108.31, 106.26, 93.81, 88.94	2082.42, 1943.21, 1858.19, 1812.9, 1794.52	1472.64, 1377.24, 1373.16, 1232.16, 1184.96, 1154.59
ir.D4.event5866	7	+	26202971	26208555	D4.event5866.1,D4.event5866.2,D4.event5866.3,D4.event5866.4	26203022^26206368-,26203022^26206368-26206510^26208393-,26203022^26206368-26206510^26208466-,26206510^26208393-	1^2-,1^2-3^4-,1^2-3^5-,3^4-	4	ENSG00000122565	CBX3	protein_coding	CDS.DOM	D4.event5866.4	PTC_50_All	7.34e-05	1	0.0764873	0.0784192	159.78, 154.17, 145.94, 145.35, 138.72	119.56, 103.26, 102.23, 90.86, 90.34, 89.79	2082.42, 1943.21, 1858.19, 1812.9, 1794.52	1472.64, 1377.24, 1373.16, 1232.16, 1184.96, 1154.59
D3.event4531	13	+	45389820	45391032	D3.event4531.1,D3.event4531.2,D3.event4531.3	,45390714-45390902^,45390758-45390902^	,1-3^,2-3^	3	ENSG00000170919	TPT1-AS1	antisense	Non-Coding	D3.event4531.1	Non-Coding	7.9e-05	3.42e-06	0.174151	0.408036	33.75, 26.33, 18.33, 18, 13.25	8, 5, 4, 4, 4, 3	70.86, 66.78, 48.48, 43.12, 39.51	29.77, 29.37, 28.97, 27.98, 25.34, 19.35
D3.event4531	13	+	45389820	45391032	D3.event4531.1,D3.event4531.2,D3.event4531.3	,45390714-45390902^,45390758-45390902^	,1-3^,2-3^	3	ENSG00000170919	TPT1-AS1	antisense	Non-Coding	D3.event4531.2	Non-Coding	7.9e-05	0.0368828	0.512502	0.363722	22.83, 21.24, 18.7, 17.66, 17.32	16.52, 14.71, 14.39, 13.49, 13.42, 9.87	70.86, 66.78, 48.48, 43.12, 39.51	29.77, 29.37, 28.97, 27.98, 25.34, 19.35
D3.event4531	13	+	45389820	45391032	D3.event4531.1,D3.event4531.2,D3.event4531.3	,45390714-45390902^,45390758-45390902^	,1-3^,2-3^	3	ENSG00000170919	TPT1-AS1	antisense	Non-Coding	D3.event4531.3	Non-Coding	7.9e-05	0.775138	0.313347	0.228241	19.21, 14.28, 12.49, 8.94, 6.42	10.95, 10.25, 9.59, 7.48, 6.63, 5.48	70.86, 66.78, 48.48, 43.12, 39.51	29.77, 29.37, 28.97, 27.98, 25.34, 19.35
D3.event3945	12	-	2864683	2866393	D3.event3945.1,D3.event3945.2,D3.event3945.3	2865399-2865355^2864752-,2864755-,2864752-	1-2^4-,3-,4-	3	ENSG00000111206	FOXM1	protein_coding	CDS.DOM	D3.event3945.3	Known-Coding	9.43e-05	1.07e-05	0.710817	0.842609	129, 111, 103.5, 103, 98	109, 105, 104, 99, 97, 92	158.49, 129.49, 122.81, 122.49, 114.49	147.47, 146.77, 144.98, 142.5, 134.93, 134.41
D3.event3945	12	-	2864683	2866393	D3.event3945.1,D3.event3945.2,D3.event3945.3	2865399-2865355^2864752-,2864755-,2864752-	1-2^4-,3-,4-	3	ENSG00000111206	FOXM1	protein_coding	CDS.DOM	D3.event3945.1	Known-Coding	9.43e-05	2.09e-05	0.230637	0.11653	24.49, 21.49, 10.49, 10.31, 9.49	40.47, 34.77, 33.41, 29.98, 29.93, 27.5	158.49, 129.49, 122.81, 122.49, 114.49	147.47, 146.77, 144.98, 142.5, 134.93, 134.41
D3.event3945	12	-	2864683	2866393	D3.event3945.1,D3.event3945.2,D3.event3945.3	2865399-2865355^2864752-,2864755-,2864752-	1-2^4-,3-,4-	3	ENSG00000111206	FOXM1	protein_coding	CDS.DOM	D3.event3945.2	Known-Coding	9.43e-05	1	0.0585467	0.0408605	9, 8, 7, 2, 1	11, 10, 9, 7, 6, 6	158.49, 129.49, 122.81, 122.49, 114.49	147.47, 146.77, 144.98, 142.5, 134.93, 134.41
ir.D4.event4310	21	-	43095743	43104402	D4.event4310.1,D4.event4310.2,D4.event4310.3,D4.event4310.4	43104315^43101432-43101366^,43104315^43101432-43101366^43100519-43100453^,43104315^43100519-43100453^,43100453^	1^2-3^,1^2-3^4-5^,1^4-5^,5^	4	ENSG00000160201	U2AF1	protein_coding	CDS.DOM	D4.event4310.1	Known-Coding	0.000111	1.36e-05	0.219365	0.165554	107.49, 92.11, 87.23, 85.91, 74.19	116.24, 111.23, 109.65, 98.49, 91.46, 85.59	649.45, 556.77, 515.4, 498.1, 479.89	523.11, 511.54, 453.31, 448.32, 439.13, 417.47
ir.D4.event4310	21	-	43095743	43104402	D4.event4310.1,D4.event4310.2,D4.event4310.3,D4.event4310.4	43104315^43101432-43101366^,43104315^43101432-43101366^43100519-43100453^,43104315^43100519-43100453^,43100453^	1^2-3^,1^2-3^4-5^,1^4-5^,5^	4	ENSG00000160201	U2AF1	protein_coding	CDS.DOM	D4.event4310.3	Known-Coding	0.000111	0.000387	0.547603	0.606016	406.26, 328.2, 315.32, 294.04, 292.19	291.01, 271.84, 252.45, 246.8, 238.07, 229.22	649.45, 556.77, 515.4, 498.1, 479.89	523.11, 511.54, 453.31, 448.32, 439.13, 417.47
ir.D4.event4310	21	-	43095743	43104402	D4.event4310.1,D4.event4310.2,D4.event4310.3,D4.event4310.4	43104315^43101432-43101366^,43104315^43101432-43101366^43100519-43100453^,43104315^43100519-43100453^,43100453^	1^2-3^,1^2-3^4-5^,1^4-5^,5^	4	ENSG00000160201	U2AF1	protein_coding	CDS.DOM	D4.event4310.2	Known-NMD	0.000111	1	0.150923	0.146081	92.44, 88.13, 76.09, 69.6, 68.1	91.19, 70.99, 67.26, 65.53, 64.53, 62.01	649.45, 556.77, 515.4, 498.1, 479.89	523.11, 511.54, 453.31, 448.32, 439.13, 417.47
ir.D4.event4310	21	-	43095743	43104402	D4.event4310.1,D4.event4310.2,D4.event4310.3,D4.event4310.4	43104315^43101432-43101366^,43104315^43101432-43101366^43100519-43100453^,43104315^43100519-43100453^,43100453^	1^2-3^,1^2-3^4-5^,1^4-5^,5^	4	ENSG00000160201	U2AF1	protein_coding	CDS.DOM	D4.event4310.4	PTC_50_All	0.000111	1	0.0821093	0.0823494	47.57, 45.41, 44.57, 44.02, 40.74	44.87, 40.36, 38.86, 35.4, 35.34, 34.49	649.45, 556.77, 515.4, 498.1, 479.89	523.11, 511.54, 453.31, 448.32, 439.13, 417.47
D2.event375	1	+	81952142	81955877	D2.event375.1,D2.event375.2	,81952987-81953025^	,1-2^	2	ENSG00000117114	LPHN2	protein_coding	CDS.DOM	D2.event375.2	Known-Coding	0.000121	0	0.128344	0.0644155	28.57, 28.28, 24.97, 16.43, 15.7	30.67, 28.98, 28.84, 27.13, 24.49, 17.89	404.43, 369.57, 350.47, 342.28, 309.2	251.98, 217.89, 210.17, 200.84, 186.49, 170.63
D2.event375	1	+	81952142	81955877	D2.event375.1,D2.event375.2	,81952987-81953025^	,1-2^	2	ENSG00000117114	LPHN2	protein_coding	CDS.DOM	D2.event375.1	Known-Coding	0.000121	0	0.871656	0.935584	388, 341, 325.5, 314, 293.5	223, 200, 179.5, 172, 162, 143.5	404.43, 369.57, 350.47, 342.28, 309.2	251.98, 217.89, 210.17, 200.84, 186.49, 170.63
D4.event3829	12	+	109576145	109586022	D4.event3829.1,D4.event3829.2,D4.event3829.3,D4.event3829.4	,109579165-109579282^109579802-109579946^109581395-109581550^,109579802-109579946^,109579802-109579946^109581395-109581550^	,1-2^3-4^5-6^,3-4^,3-4^5-6^	4	ENSG00000110921	MVK	protein_coding	CDS.DOM	D4.event3829.3	Known-Coding	0.000121	1.03e-05	0.263741	0.181224	66.8, 40.8, 38.21, 36, 34.29	84.72, 77.65, 77.27, 75.78, 74.16, 65.92	309.64, 230.97, 227.58, 218.08, 205	305.53, 298.73, 291.46, 291.45, 283.41, 256.62
D4.event3829	12	+	109576145	109586022	D4.event3829.1,D4.event3829.2,D4.event3829.3,D4.event3829.4	,109579165-109579282^109579802-109579946^109581395-109581550^,109579802-109579946^,109579802-109579946^109581395-109581550^	,1-2^3-4^5-6^,3-4^,3-4^5-6^	4	ENSG00000110921	MVK	protein_coding	CDS.DOM	D4.event3829.4	Known-Coding	0.000121	0.00605448	0.580586	0.650922	196.49, 156.4, 147.18, 146.5, 128.77	178.46, 177.74, 167.95, 167.24, 165.39, 146.16	309.64, 230.97, 227.58, 218.08, 205	305.53, 298.73, 291.46, 291.45, 283.41, 256.62
D4.event3829	12	+	109576145	109586022	D4.event3829.1,D4.event3829.2,D4.event3829.3,D4.event3829.4	,109579165-109579282^109579802-109579946^109581395-109581550^,109579802-109579946^,109579802-109579946^109581395-109581550^	,1-2^3-4^5-6^,3-4^,3-4^5-6^	4	ENSG00000110921	MVK	protein_coding	CDS.DOM	D4.event3829.2	Known-NMD	0.000121	1	0.0662446	0.0847714	24.4, 21.28, 20.37, 18.43, 16.35	21.51, 20.54, 19.5, 19.24, 18.05, 15.42	309.64, 230.97, 227.58, 218.08, 205	305.53, 298.73, 291.46, 291.45, 283.41, 256.62
D4.event3829	12	+	109576145	109586022	D4.event3829.1,D4.event3829.2,D4.event3829.3,D4.event3829.4	,109579165-109579282^109579802-109579946^109581395-109581550^,109579802-109579946^,109579802-109579946^109581395-109581550^	,1-2^3-4^5-6^,3-4^,3-4^5-6^	4	ENSG00000110921	MVK	protein_coding	CDS.DOM	D4.event3829.1	Known-Coding	0.000121	1	0.0894285	0.0830827	30, 20, 19, 17, 13	34, 32, 24, 23, 21.5, 20	309.64, 230.97, 227.58, 218.08, 205	305.53, 298.73, 291.46, 291.45, 283.41, 256.62
D4.event16059	8	-	100948900	100952850	D4.event16059.1,D4.event16059.3,D4.event16059.4	,100952128-100951929^,100952125-100951929^	,1-3^,2-3^	3	ENSG00000164924	YWHAZ	protein_coding	UTR-5	D4.event16059.1	UTR-5	0.000121	9.15e-06	0.539253	0.442113	150.51, 134.7, 119.19, 98.14, 95.4	227.4, 197.57, 194.1, 185.83, 178.04, 168.14	339.31, 286.15, 260.31, 236.77, 228.94	420.82, 359.07, 357.41, 354.16, 340.28, 303.21
D4.event16059	8	-	100948900	100952850	D4.event16059.1,D4.event16059.3,D4.event16059.4	,100952128-100951929^,100952125-100951929^	,1-3^,2-3^	3	ENSG00000164924	YWHAZ	protein_coding	UTR-5	D4.event16059.3	UTR-5	0.000121	0.0311685	0.147519	0.192288	75.52, 49.94, 48.52, 45.29, 40.99	60.19, 59.19, 55.31, 51.84, 50.34, 37.78	339.31, 286.15, 260.31, 236.77, 228.94	420.82, 359.07, 357.41, 354.16, 340.28, 303.21
D4.event16059	8	-	100948900	100952850	D4.event16059.1,D4.event16059.3,D4.event16059.4	,100952128-100951929^,100952125-100951929^	,1-3^,2-3^	3	ENSG00000164924	YWHAZ	protein_coding	UTR-5	D4.event16059.4	UTR-5	0.000121	0.0646931	0.313228	0.365599	113.28, 102.93, 96.08, 91.18, 89.81	134.23, 127.19, 116.49, 104.53, 102.05, 84.73	339.31, 286.15, 260.31, 236.77, 228.94	420.82, 359.07, 357.41, 354.16, 340.28, 303.21
D2.event14670	6	-	130867581	130870126	D2.event14670.1,D2.event14670.2	130869812^,130869563^	1^,2^	2	ENSG00000079819	EPB41L2	protein_coding	CDS	D2.event14670.1	Known-Coding	0.000131	0	0.13589	0.270811	30, 25, 23, 22, 15	14, 14, 14, 14, 10, 9	105, 85, 82, 77, 76	112, 105, 91, 86, 86, 76
D2.event14670	6	-	130867581	130870126	D2.event14670.1,D2.event14670.2	130869812^,130869563^	1^,2^	2	ENSG00000079819	EPB41L2	protein_coding	CDS	D2.event14670.2	Known-Coding	0.000131	0	0.86411	0.729189	80, 61, 59, 55, 55	98, 91, 81, 77, 72, 62	105, 85, 82, 77, 76	112, 105, 91, 86, 86, 76
D2.event14174	6	+	41090309	41091694	D2.event14174.1,D2.event14174.2	41091528-,41091546-	1-,2-	2	ENSG00000001167	NFYA	protein_coding	CDS	D2.event14174.1	Known-Coding	0.000133	0	0.565166	0.695058	145, 131, 126, 124.5, 117	78, 75, 58, 57, 52, 43	197, 190, 185, 179, 174.5	135, 132, 97, 95, 92, 91
D2.event14174	6	+	41090309	41091694	D2.event14174.1,D2.event14174.2	41091528-,41091546-	1-,2-	2	ENSG00000001167	NFYA	protein_coding	CDS	D2.event14174.2	Known-Coding	0.000133	0	0.434834	0.304942	64, 62, 54, 52, 50	57, 57, 48, 45, 38, 34	197, 190, 185, 179, 174.5	135, 132, 97, 95, 92, 91
D2.event3541	12	+	27676599	27679489	D2.event3541.1,D2.event3541.2	,27677064-27677096^	,1-2^	2	ENSG00000110841	PPFIBP1	protein_coding	CDS	D2.event3541.1	Known-Coding	0.000134	0	0.839682	0.964158	68, 65, 65, 53, 48	56, 52.5, 41.5, 38, 35, 34	71.46, 67, 66.41, 54.41, 50	60, 58.66, 50.25, 47.8, 47.49, 41.48
D2.event3541	12	+	27676599	27679489	D2.event3541.1,D2.event3541.2	,27677064-27677096^	,1-2^	2	ENSG00000110841	PPFIBP1	protein_coding	CDS	D2.event3541.2	Known-Coding	0.000134	0	0.160318	0.0358417	3.46, 2, 2, 1.41, 1.41	12.49, 9.8, 8.75, 7.48, 6.16, 4	71.46, 67, 66.41, 54.41, 50	60, 58.66, 50.25, 47.8, 47.49, 41.48
D5.event4766	13	-	110893263	110906033	D5.event4766.1,D5.event4766.2,D5.event4766.3,D5.event4766.4,D5.event4766.5	,110900694-110900530^,110900661-110900530^,110894393-110894285^110894202-110894109^,110894202-110894109^	,1-3^,2-3^,4-5^6-7^,6-7^	5	ENSG00000088448	ANKRD10	protein_coding	CDS	D5.event4766.2	PTC_50_All	0.000146	0.000155878	0.205887	0.328934	38.57, 38.37, 38.18, 37.12, 30.89	29.24, 27.96, 22.98, 18.71, 17.03, 15.49	130.19, 118.33, 115.81, 97.49, 95.22	129.57, 125.91, 107.65, 106.09, 97.52, 71.63
D5.event4766	13	-	110893263	110906033	D5.event4766.1,D5.event4766.2,D5.event4766.3,D5.event4766.4,D5.event4766.5	,110900694-110900530^,110900661-110900530^,110894393-110894285^110894202-110894109^,110894202-110894109^	,1-3^,2-3^,4-5^6-7^,6-7^	5	ENSG00000088448	ANKRD10	protein_coding	CDS	D5.event4766.1	Known-Coding	0.000146	0.000807908	0.510492	0.382165	57, 43, 39, 38, 36	67, 66, 60, 52, 45, 36	130.19, 118.33, 115.81, 97.49, 95.22	129.57, 125.91, 107.65, 106.09, 97.52, 71.63
D5.event4766	13	-	110893263	110906033	D5.event4766.1,D5.event4766.2,D5.event4766.3,D5.event4766.4,D5.event4766.5	,110900694-110900530^,110900661-110900530^,110894393-110894285^110894202-110894109^,110894202-110894109^	,1-3^,2-3^,4-5^6-7^,6-7^	5	ENSG00000088448	ANKRD10	protein_coding	CDS	D5.event4766.3	Known-NMD	0.000146	1	0.123228	0.161627	24.9, 24, 16.43, 14.56, 10.3	18.97, 17.55, 13.23, 11.83, 11.75, 5.39	130.19, 118.33, 115.81, 97.49, 95.22	129.57, 125.91, 107.65, 106.09, 97.52, 71.63
D5.event4766	13	-	110893263	110906033	D5.event4766.1,D5.event4766.2,D5.event4766.3,D5.event4766.4,D5.event4766.5	,110900694-110900530^,110900661-110900530^,110894393-110894285^110894202-110894109^,110894202-110894109^	,1-3^,2-3^,4-5^6-7^,6-7^	5	ENSG00000088448	ANKRD10	protein_coding	CDS	D5.event4766.5	Known-Coding	0.000146	1	0.0869912	0.0689287	11.31, 9.8, 6.78, 6.48, 4	16.25, 8.37, 8.12, 7.94, 7.75, 7.07	130.19, 118.33, 115.81, 97.49, 95.22	129.57, 125.91, 107.65, 106.09, 97.52, 71.63
D5.event4766	13	-	110893263	110906033	D5.event4766.1,D5.event4766.2,D5.event4766.3,D5.event4766.4,D5.event4766.5	,110900694-110900530^,110900661-110900530^,110894393-110894285^110894202-110894109^,110894202-110894109^	,1-3^,2-3^,4-5^6-7^,6-7^	5	ENSG00000088448	ANKRD10	protein_coding	CDS	D5.event4766.4	Frameshift_PTC_50_Any	0.000146	1	0.0734018	0.0583461	7.96, 7.27, 7.06, 5.04, 5.02	10.83, 10.72, 7.37, 6.99, 5.74, 5.09	130.19, 118.33, 115.81, 97.49, 95.22	129.57, 125.91, 107.65, 106.09, 97.52, 71.63
ir.D4.event3473	19	-	10352926	10354234	D4.event3473.1,D4.event3473.2,D4.event3473.3,D4.event3473.4	,10354042^10353646-10353528^10353098-,10354042^10353098-,10353528^10353098-	,1^2-3^4-,1^4-,3^4-	4	ENSG00000105397	TYK2	protein_coding	CDS.DOM	D4.event3473.2	Known-Coding	0.000183	0.000338661	0.561935	0.38331	22.27, 15.87, 15.56, 14.39, 13.67	44.47, 42.59, 42.22, 41.1, 31.81, 31.62	56.32, 44.61, 42.97, 41.68, 39.72	82.94, 74.96, 73.48, 71.16, 59.43, 59.11
ir.D4.event3473	19	-	10352926	10354234	D4.event3473.1,D4.event3473.2,D4.event3473.3,D4.event3473.4	,10354042^10353646-10353528^10353098-,10354042^10353098-,10353528^10353098-	,1^2-3^4-,1^4-,3^4-	4	ENSG00000105397	TYK2	protein_coding	CDS.DOM	D4.event3473.1	PTC_50_All	0.000183	0.000494268	0.10611	0.234552	11.22, 10.25, 9.8, 9.38, 9.38	11.22, 7.94, 7.94, 6.32, 5.83, 4.9	56.32, 44.61, 42.97, 41.68, 39.72	82.94, 74.96, 73.48, 71.16, 59.43, 59.11
ir.D4.event3473	19	-	10352926	10354234	D4.event3473.1,D4.event3473.2,D4.event3473.3,D4.event3473.4	,10354042^10353646-10353528^10353098-,10354042^10353098-,10353528^10353098-	,1^2-3^4-,1^4-,3^4-	4	ENSG00000105397	TYK2	protein_coding	CDS.DOM	D4.event3473.4	PTC_50_All	0.000183	1	0.331956	0.382138	20.83, 16.25, 15.91, 14.85, 13.67	27.62, 22.95, 22.55, 22.11, 21.91, 20.98	56.32, 44.61, 42.97, 41.68, 39.72	82.94, 74.96, 73.48, 71.16, 59.43, 59.11
D2.event16883	X	+	48902042	48902732	D2.event16883.1,D2.event16883.2	,48902233-48902517^	,1-2^	2	ENSG00000102103	PQBP1	protein_coding	CDS	D2.event16883.1	Known-Coding	0.000193	0	0.0566471	0.156875	26, 25, 24, 13.5, 10	12, 12, 10, 5, 4, 3	148.52, 136.25, 118.73, 117.91, 102.37	146.96, 140.49, 135.9, 131.82, 130, 123.49
D2.event16883	X	+	48902042	48902732	D2.event16883.1,D2.event16883.2	,48902233-48902517^	,1-2^	2	ENSG00000102103	PQBP1	protein_coding	CDS	D2.event16883.2	Known-Coding	0.000193	0	0.943353	0.843125	122.52, 112.25, 105.23, 92.91, 92.37	143.96, 136.49, 125.9, 119.82, 118.49, 118	148.52, 136.25, 118.73, 117.91, 102.37	146.96, 140.49, 135.9, 131.82, 130, 123.49
D3.event2325	10	-	101792943	101797980	D3.event2325.1,D3.event2325.3	,101793998-101793913^	,1-2^	2	ENSG00000198408	MGEA5	protein_coding	CDS	D3.event2325.1	Known-Coding	0.000194	0	0.0698793	0.157956	22, 19, 16, 14, 13	13, 12.5, 9.5, 8, 7, 5	120.52, 111.13, 109.91, 98.24, 93	155.83, 153.36, 127.72, 126.66, 117.41, 109.15
D3.event2325	10	-	101792943	101797980	D3.event2325.1,D3.event2325.3	,101793998-101793913^	,1-2^	2	ENSG00000198408	MGEA5	protein_coding	CDS	D3.event2325.3	Known-Coding	0.000194	0	0.930121	0.842044	98.52, 97.13, 93.91, 80, 79.24	147.83, 140.86, 117.16, 114.72, 112.41, 102.15	120.52, 111.13, 109.91, 98.24, 93	155.83, 153.36, 127.72, 126.66, 117.41, 109.15
ir.D4.event4917	3	-	170868013	170870195	D4.event4917.1,D4.event4917.2,D4.event4917.3,D4.event4917.4	170870159^170868390-,170870159^170868390-170868298^170868201-,170870159^170868387-170868298^170868134-,170868298^170868134-	1^2-,1^2-4^5-,1^3-4^6-,4^6-	4	ENSG00000163584	RPL22L1	protein_coding	CDS.DOM	D4.event4917.3	Known-Coding	0.000206	2.67e-05	0.303466	0.194008	31.5, 25.5, 19.49, 18.89, 14.28	80.42, 77.73, 69.74, 63.17, 58.58, 48.91	131.51, 130.93, 103.97, 102.74, 95.86	244.02, 241.89, 227.61, 219.69, 198.01, 181.85
ir.D4.event4917	3	-	170868013	170870195	D4.event4917.1,D4.event4917.2,D4.event4917.3,D4.event4917.4	170870159^170868390-,170870159^170868390-170868298^170868201-,170870159^170868387-170868298^170868134-,170868298^170868134-	1^2-,1^2-4^5-,1^3-4^6-,4^6-	4	ENSG00000163584	RPL22L1	protein_coding	CDS.DOM	D4.event4917.1	PTC_50_All	0.000206	0.254377	0.0861313	0.127497	18.84, 17.61, 13.86, 10.95, 10.77	25.14, 23.83, 22.38, 18.33, 12.08, 11.4	131.51, 130.93, 103.97, 102.74, 95.86	244.02, 241.89, 227.61, 219.69, 198.01, 181.85
ir.D4.event4917	3	-	170868013	170870195	D4.event4917.1,D4.event4917.2,D4.event4917.3,D4.event4917.4	170870159^170868390-,170870159^170868390-170868298^170868201-,170870159^170868387-170868298^170868134-,170868298^170868134-	1^2-,1^2-4^5-,1^3-4^6-,4^6-	4	ENSG00000163584	RPL22L1	protein_coding	CDS.DOM	D4.event4917.4	PTC_50_All	0.000206	1	0.273793	0.317779	40.15, 39.5, 36.18, 33.5, 30.2	71.33, 62.86, 60.98, 55.5, 54.68, 54.09	131.51, 130.93, 103.97, 102.74, 95.86	244.02, 241.89, 227.61, 219.69, 198.01, 181.85
ir.D4.event4917	3	-	170868013	170870195	D4.event4917.1,D4.event4917.2,D4.event4917.3,D4.event4917.4	170870159^170868390-,170870159^170868390-170868298^170868201-,170870159^170868387-170868298^170868134-,170868298^170868134-	1^2-,1^2-4^5-,1^3-4^6-,4^6-	4	ENSG00000163584	RPL22L1	protein_coding	CDS.DOM	D4.event4917.2	Known-NMD	0.000206	1	0.33661	0.360716	47.67, 41.67, 39.19, 37.95, 37.31	85.72, 76.68, 76.3, 69.35, 67.69, 66.18	131.51, 130.93, 103.97, 102.74, 95.86	244.02, 241.89, 227.61, 219.69, 198.01, 181.85
D6.event15095	7	+	128739432	128758871	D6.event15095.2,D6.event15095.4,D6.event15095.5,D6.event15095.6	128747553-128748367^128748573-128748804^128754262-128754455^,128747553-128748367^128748573-128748804^128754529-128754722^,128748573-128748804^128754262-128754455^,128748573-128748804^128754529-128754722^	1-2^3-4^5-6^,1-2^3-4^7-8^,3-4^5-6^,3-4^7-8^	4	ENSG00000128595	CALU	protein_coding	CDS.DOM	D6.event15095.2	Known-Coding	0.000207	0.00033445	0.114621	0.152771	91.2, 85.76, 79.1, 75.43, 72.81	80.31, 77.24, 68.57, 67.87, 67.66, 55.9	581.72, 543.27, 537.48, 499.18, 484.84	667.07, 658.26, 647.54, 611.94, 562.51, 495.73
D6.event15095	7	+	128739432	128758871	D6.event15095.2,D6.event15095.4,D6.event15095.5,D6.event15095.6	128747553-128748367^128748573-128748804^128754262-128754455^,128747553-128748367^128748573-128748804^128754529-128754722^,128748573-128748804^128754262-128754455^,128748573-128748804^128754529-128754722^	1-2^3-4^5-6^,1-2^3-4^7-8^,3-4^5-6^,3-4^7-8^	4	ENSG00000128595	CALU	protein_coding	CDS.DOM	D6.event15095.5	Known-Coding	0.000207	0.0843822	0.657358	0.620659	356.14, 329.72, 329.64, 316.82, 310.26	439.56, 432.85, 427.95, 400.41, 371.48, 322.56	581.72, 543.27, 537.48, 499.18, 484.84	667.07, 658.26, 647.54, 611.94, 562.51, 495.73
D6.event15095	7	+	128739432	128758871	D6.event15095.2,D6.event15095.4,D6.event15095.5,D6.event15095.6	128747553-128748367^128748573-128748804^128754262-128754455^,128747553-128748367^128748573-128748804^128754529-128754722^,128748573-128748804^128754262-128754455^,128748573-128748804^128754529-128754722^	1-2^3-4^5-6^,1-2^3-4^7-8^,3-4^5-6^,3-4^7-8^	4	ENSG00000128595	CALU	protein_coding	CDS.DOM	D6.event15095.4	Known-Coding	0.000207	0.425576	0.0439321	0.0576241	35.01, 33.53, 31.63, 26.88, 25.44	31.2, 30.28, 27.06, 25.01, 24.09, 22.38	581.72, 543.27, 537.48, 499.18, 484.84	667.07, 658.26, 647.54, 611.94, 562.51, 495.73
D6.event15095	7	+	128739432	128758871	D6.event15095.2,D6.event15095.4,D6.event15095.5,D6.event15095.6	128747553-128748367^128748573-128748804^128754262-128754455^,128747553-128748367^128748573-128748804^128754529-128754722^,128748573-128748804^128754262-128754455^,128748573-128748804^128754529-128754722^	1-2^3-4^5-6^,1-2^3-4^7-8^,3-4^5-6^,3-4^7-8^	4	ENSG00000128595	CALU	protein_coding	CDS.DOM	D6.event15095.6	Known-Coding	0.000207	1	0.184089	0.168946	99.37, 97.11, 94.26, 80.05, 76.33	129.7, 122.79, 122.71, 115.9, 98.15, 81.42	581.72, 543.27, 537.48, 499.18, 484.84	667.07, 658.26, 647.54, 611.94, 562.51, 495.73
D3.event3231	11	-	73411536	73430690	D3.event3231.1,D3.event3231.2,D3.event3231.3	,73425048-73425022^73419999-73419874^,73419999-73419874^	,1-2^3-4^,3-4^	3	ENSG00000054965	FAM168A	protein_coding	CDS.DOM	D3.event3231.2	Known-Coding	0.000228	0.000165837	0.107918	0.219525	21.6, 17.04, 16.38, 13.02, 9.92	11.15, 10.77, 9.49, 9.16, 6.48, 5.34	92.41, 73.16, 70.7, 66.52, 52.34	90.57, 86.36, 85.18, 76.43, 74.41, 72.51
D3.event3231	11	-	73411536	73430690	D3.event3231.1,D3.event3231.2,D3.event3231.3	,73425048-73425022^73419999-73419874^,73419999-73419874^	,1-2^3-4^,3-4^	3	ENSG00000054965	FAM168A	protein_coding	CDS.DOM	D3.event3231.1	Known-Coding	0.000228	0.107935	0.0679773	0.0281587	4, 3, 1, 1, 1	7, 6, 6, 6, 5, 3	92.41, 73.16, 70.7, 66.52, 52.34	90.57, 86.36, 85.18, 76.43, 74.41, 72.51
D3.event3231	11	-	73411536	73430690	D3.event3231.1,D3.event3231.2,D3.event3231.3	,73425048-73425022^73419999-73419874^,73419999-73419874^	,1-2^3-4^,3-4^	3	ENSG00000054965	FAM168A	protein_coding	CDS.DOM	D3.event3231.3	Known-Coding	0.000228	0.166065	0.824104	0.752316	66.81, 56.68, 55.78, 46.48, 41.42	73.42, 70.2, 68.41, 68.09, 60.03, 59.92	92.41, 73.16, 70.7, 66.52, 52.34	90.57, 86.36, 85.18, 76.43, 74.41, 72.51
D2.event7623	17	-	41893174	41897749	D2.event7623.1,D2.event7623.2	,41896649-41896620^	,1-2^	2	ENSG00000131473	ACLY	protein_coding	CDS	D2.event7623.1	Known-Coding	0.000228	0	0.469284	0.416993	414.5, 396, 356, 340, 318.5	498, 482, 471.5, 468.5, 468.5, 407	953, 944.6, 864.65, 807.99, 804.85	1065.62, 1054.51, 1032.29, 1000.3, 959.08, 847.45
D2.event7623	17	-	41893174	41897749	D2.event7623.1,D2.event7623.2	,41896649-41896620^	,1-2^	2	ENSG00000131473	ACLY	protein_coding	CDS	D2.event7623.2	Known-Coding	0.000228	0	0.530716	0.583007	548.6, 538.5, 508.65, 489.49, 464.85	586.01, 567.62, 550.29, 528.8, 490.58, 440.45	953, 944.6, 864.65, 807.99, 804.85	1065.62, 1054.51, 1032.29, 1000.3, 959.08, 847.45
D2.event6282	16	+	30064784	30067234	D2.event6282.1,D2.event6282.2	,30065876-30065927^	,1-2^	2	ENSG00000149925	ALDOA	protein_coding	UTR-5	D2.event6282.2	UTR-5	0.000246	0	0.582498	0.784127	95.18, 69.91, 64.98, 52.38, 31	88.97, 85.21, 75.59, 64.81, 52.17, 30.36	114.01, 82.41, 80.98, 67.05, 51.17	146.09, 136.3, 132.54, 94.48, 93.5, 73.86
D2.event6282	16	+	30064784	30067234	D2.event6282.1,D2.event6282.2	,30065876-30065927^	,1-2^	2	ENSG00000149925	ALDOA	protein_coding	UTR-5	D2.event6282.1	UTR-5	0.000246	0	0.417502	0.215873	20.17, 18.83, 16, 14.67, 12.5	70.5, 47.33, 47.33, 43.5, 41.33, 29.67	114.01, 82.41, 80.98, 67.05, 51.17	146.09, 136.3, 132.54, 94.48, 93.5, 73.86
D2.event14694	6	-	136261477	136268162	D2.event14694.1,D2.event14694.2	,136267175-136267029^	,1-2^	2	ENSG00000029363	BCLAF1	protein_coding	CDS.DOM	D2.event14694.1	Known-Coding	0.00026	0	0.211541	0.274347	152, 151, 142, 134, 130	124, 90, 84, 82, 80, 59	547.82, 525.59, 519.34, 500.62, 491.96	525.4, 426.14, 411.66, 402.33, 368.46, 315.55
D2.event14694	6	-	136261477	136268162	D2.event14694.1,D2.event14694.2	,136267175-136267029^	,1-2^	2	ENSG00000029363	BCLAF1	protein_coding	CDS.DOM	D2.event14694.2	Known-Coding	0.00026	0	0.788459	0.725653	395.82, 385.34, 383.59, 361.96, 349.62	401.4, 344.14, 322.33, 321.66, 284.46, 256.55	547.82, 525.59, 519.34, 500.62, 491.96	525.4, 426.14, 411.66, 402.33, 368.46, 315.55
D2.event12010	3	+	197950206	197950936	D2.event12010.1,D2.event12010.2	197950221^,197950299^	1^,2^	2	ENSG00000182899	RPL35A	protein_coding	UTR-5	D2.event12010.1	UTR-5	0.000305	0	0.863874	0.89929	1418, 1286.5, 1268, 1205.5, 1142.5	1198, 1140, 1073.5, 992.5, 966, 945	1565, 1457.5, 1395, 1326.5, 1283.5	1380, 1282, 1264.5, 1173.5, 1119, 1090
D2.event12010	3	+	197950206	197950936	D2.event12010.1,D2.event12010.2	197950221^,197950299^	1^,2^	2	ENSG00000182899	RPL35A	protein_coding	UTR-5	D2.event12010.2	UTR-5	0.000305	0	0.136126	0.10071	171, 147, 141, 127, 121	191, 182, 181, 153, 145, 142	1565, 1457.5, 1395, 1326.5, 1283.5	1380, 1282, 1264.5, 1173.5, 1119, 1090
D4.event2757	11	+	85628688	85634086	D4.event2757.1,D4.event2757.2,D4.event2757.3,D4.event2757.4	,85629132-85629262^85631687-85631808^,85631145-85631316^85631687-85631808^,85631687-85631808^	,1-2^5-6^,3-4^5-6^,5-6^	4	ENSG00000171204	TMEM126B	protein_coding	CDS.DOM	D4.event2757.3	Known-Coding	0.000319	0.000158117	0.429919	0.539186	103.46, 90.38, 87.31, 84.22, 82.56	99.31, 84.77, 80.92, 72.03, 69.28, 68.49	193.77, 168.25, 159.4, 158.15, 151.32	211.89, 208.25, 193.5, 179.98, 160.65, 149.96
D4.event2757	11	+	85628688	85634086	D4.event2757.1,D4.event2757.2,D4.event2757.3,D4.event2757.4	,85629132-85629262^85631687-85631808^,85631145-85631316^85631687-85631808^,85631687-85631808^	,1-2^5-6^,3-4^5-6^,5-6^	4	ENSG00000171204	TMEM126B	protein_coding	CDS.DOM	D4.event2757.4	Known-Coding	0.000319	0.00244	0.427543	0.335804	72.75, 55.7, 55.24, 50, 45.43	89.73, 87.11, 87.09, 78.13, 68.77, 61.33	193.77, 168.25, 159.4, 158.15, 151.32	211.89, 208.25, 193.5, 179.98, 160.65, 149.96
D4.event2757	11	+	85628688	85634086	D4.event2757.1,D4.event2757.2,D4.event2757.3,D4.event2757.4	,85629132-85629262^85631687-85631808^,85631145-85631316^85631687-85631808^,85631687-85631808^	,1-2^5-6^,3-4^5-6^,5-6^	4	ENSG00000171204	TMEM126B	protein_coding	CDS.DOM	D4.event2757.1	Known-Coding	0.000319	0.34	0.0380283	0.0179178	7, 3, 3, 2, 0	12, 9, 7, 6, 4, 4	193.77, 168.25, 159.4, 158.15, 151.32	211.89, 208.25, 193.5, 179.98, 160.65, 149.96
D4.event2757	11	+	85628688	85634086	D4.event2757.1,D4.event2757.2,D4.event2757.3,D4.event2757.4	,85629132-85629262^85631687-85631808^,85631145-85631316^85631687-85631808^,85631687-85631808^	,1-2^5-6^,3-4^5-6^,5-6^	4	ENSG00000171204	TMEM126B	protein_coding	CDS.DOM	D4.event2757.2	Known-NMD	0.000319	1	0.10451	0.107092	21.59, 18.76, 18.7, 15.23, 14.56	25.36, 21.75, 18.6, 18.49, 16.14, 14.93	193.77, 168.25, 159.4, 158.15, 151.32	211.89, 208.25, 193.5, 179.98, 160.65, 149.96
D2.event10319	2	-	152677475	152679352	D2.event10319.1,D2.event10319.2	,152679109-152679056^	,1-2^	2	ENSG00000196504	PRPF40A	protein_coding	CDS	D2.event10319.1	Known-Coding	0.000323	0	0.098504	0.0502894	27, 20, 17, 13, 8	37, 37, 33, 33, 32, 31	346.89, 340.1, 339.69, 338.93, 308.4	393.33, 366.36, 359.63, 335.72, 311.82, 310.25
D2.event10319	2	-	152677475	152679352	D2.event10319.1,D2.event10319.2	,152679109-152679056^	,1-2^	2	ENSG00000196504	PRPF40A	protein_coding	CDS	D2.event10319.2	Known-Coding	0.000323	0	0.901496	0.949711	332.1, 326.89, 326.69, 311.93, 291.4	360.33, 329.36, 326.63, 298.72, 279.82, 279.25	346.89, 340.1, 339.69, 338.93, 308.4	393.33, 366.36, 359.63, 335.72, 311.82, 310.25
ir.D3.event6415	9	-	35102095	35103157	D3.event6415.1,D3.event6415.2,D3.event6415.3	35103050^35102823-,35103050^35102823-35102686^35102194-,35102686^35102194-	1^2-,1^2-3^4-,3^4-	3	ENSG00000165283	STOML2	protein_coding	CDS.DOM	D3.event6415.3	Frameshift_PTC_50_Any	0.000401	5.56e-05	0.129021	0.187312	67.75, 52.12, 47.07, 46.18, 45.99	60.75, 57.55, 57.25, 48.28, 44.83, 43.2	317.66, 308.29, 273.32, 250.3, 233.82	444.35, 431.44, 395.03, 389.87, 380.96, 375.64
ir.D3.event6415	9	-	35102095	35103157	D3.event6415.1,D3.event6415.2,D3.event6415.3	35103050^35102823-,35103050^35102823-35102686^35102194-,35102686^35102194-	1^2-,1^2-3^4-,3^4-	3	ENSG00000165283	STOML2	protein_coding	CDS.DOM	D3.event6415.2	Known-Coding	0.000401	0.0009605	0.722599	0.658383	214.43, 196.23, 181.25, 167.94, 150.98	327.12, 312.87, 285.99, 279.42, 271.48, 270.05	317.66, 308.29, 273.32, 250.3, 233.82	444.35, 431.44, 395.03, 389.87, 380.96, 375.64
ir.D3.event6415	9	-	35102095	35103157	D3.event6415.1,D3.event6415.2,D3.event6415.3	35103050^35102823-,35103050^35102823-35102686^35102194-,35102686^35102194-	1^2-,1^2-3^4-,3^4-	3	ENSG00000165283	STOML2	protein_coding	CDS.DOM	D3.event6415.1	PTC_50_All	0.000401	1	0.148379	0.154305	56.16, 44.31, 39.95, 36.85, 36.18	64.65, 61.02, 60.68, 58.36, 57.31, 56.48	317.66, 308.29, 273.32, 250.3, 233.82	444.35, 431.44, 395.03, 389.87, 380.96, 375.64
D3.event14173	6	+	41079164	41084046	D3.event14173.1,D3.event14173.2,D3.event14173.3	,41080811-41080897^,41080814-41080897^	,1-3^,2-3^	3	ENSG00000001167	NFYA	protein_coding	CDS	D3.event14173.1	Known-Coding	0.000405	2.38e-05	0.433682	0.282533	43, 38, 32, 30, 28	39, 37, 32, 27, 21, 20	142.6, 125.94, 119.97, 112.14, 104.55	81.82, 80.15, 69.33, 65.65, 62.46, 46.25
D3.event14173	6	+	41079164	41084046	D3.event14173.1,D3.event14173.2,D3.event14173.3	,41080811-41080897^,41080814-41080897^	,1-3^,2-3^	3	ENSG00000001167	NFYA	protein_coding	CDS	D3.event14173.2	Known-Coding	0.000405	0.0472076	0.395363	0.491966	70.55, 67.23, 57.66, 53.4, 48.99	35.5, 29.72, 29.46, 28.84, 20.9, 16	142.6, 125.94, 119.97, 112.14, 104.55	81.82, 80.15, 69.33, 65.65, 62.46, 46.25
D3.event14173	6	+	41079164	41084046	D3.event14173.1,D3.event14173.2,D3.event14173.3	,41080811-41080897^,41080814-41080897^	,1-3^,2-3^	3	ENSG00000001167	NFYA	protein_coding	CDS	D3.event14173.3	Known-Coding	0.000405	0.563457	0.170955	0.225501	32.37, 28.57, 27.39, 24.48, 23.56	13.49, 13.1, 12.65, 12, 10.25, 7.75	142.6, 125.94, 119.97, 112.14, 104.55	81.82, 80.15, 69.33, 65.65, 62.46, 46.25
ir.D8.event2634	17	+	5422769	5432542	D8.event2634.1,D8.event2634.2,D8.event2634.3,D8.event2634.4,D8.event2634.5,D8.event2634.6,D8.event2634.7,D8.event2634.8	5422829^,5422829^5425971-5426082^,5422829^5425971-5426082^5426236-5426299^,5422829^5425971-5426082^5426236-5426299^5428071-5428211^,5422829^5425971-5426082^5428071-5428211^,5422829^5425971-5428211^,5422829^5426236-5426299^,5426082^	1^,1^2-3^,1^2-3^4-5^,1^2-3^4-5^6-7^,1^2-3^6-7^,1^2-7^,1^4-5^,3^	8	ENSG00000129197	RPAIN	protein_coding	CDS.DOM	D8.event2634.2	Known-Coding	0.000421	0.0031606	0.0724496	0.106618	59.58, 56.92, 52.73, 52.45, 46.64	34.73, 32.31, 27.42, 24.86, 23.87, 23.87	548.86, 510.04, 490.73, 490.37, 476.64	454.59, 396.4, 380.23, 367.51, 363.42, 343.73
ir.D8.event2634	17	+	5422769	5432542	D8.event2634.1,D8.event2634.2,D8.event2634.3,D8.event2634.4,D8.event2634.5,D8.event2634.6,D8.event2634.7,D8.event2634.8	5422829^,5422829^5425971-5426082^,5422829^5425971-5426082^5426236-5426299^,5422829^5425971-5426082^5426236-5426299^5428071-5428211^,5422829^5425971-5426082^5428071-5428211^,5422829^5425971-5428211^,5422829^5426236-5426299^,5426082^	1^,1^2-3^,1^2-3^4-5^,1^2-3^4-5^6-7^,1^2-3^6-7^,1^2-7^,1^4-5^,3^	8	ENSG00000129197	RPAIN	protein_coding	CDS.DOM	D8.event2634.8	PTC_50_All	0.000421	0.106092	0.0309169	0.0493637	26.93, 25.92, 25.51, 23.07, 22.8	14.7, 13.42, 12.17, 10.95, 10.1, 9.95	548.86, 510.04, 490.73, 490.37, 476.64	454.59, 396.4, 380.23, 367.51, 363.42, 343.73
ir.D8.event2634	17	+	5422769	5432542	D8.event2634.1,D8.event2634.2,D8.event2634.3,D8.event2634.4,D8.event2634.5,D8.event2634.6,D8.event2634.7,D8.event2634.8	5422829^,5422829^5425971-5426082^,5422829^5425971-5426082^5426236-5426299^,5422829^5425971-5426082^5426236-5426299^5428071-5428211^,5422829^5425971-5426082^5428071-5428211^,5422829^5425971-5428211^,5422829^5426236-5426299^,5426082^	1^,1^2-3^,1^2-3^4-5^,1^2-3^4-5^6-7^,1^2-3^6-7^,1^2-7^,1^4-5^,3^	8	ENSG00000129197	RPAIN	protein_coding	CDS.DOM	D8.event2634.1	Known-Coding	0.000421	0.106	0.221824	0.183975	101.5, 94, 91.5, 91, 85	96, 93, 88.5, 86, 81, 67	548.86, 510.04, 490.73, 490.37, 476.64	454.59, 396.4, 380.23, 367.51, 363.42, 343.73
ir.D8.event2634	17	+	5422769	5432542	D8.event2634.1,D8.event2634.2,D8.event2634.3,D8.event2634.4,D8.event2634.5,D8.event2634.6,D8.event2634.7,D8.event2634.8	5422829^,5422829^5425971-5426082^,5422829^5425971-5426082^5426236-5426299^,5422829^5425971-5426082^5426236-5426299^5428071-5428211^,5422829^5425971-5426082^5428071-5428211^,5422829^5425971-5428211^,5422829^5426236-5426299^,5426082^	1^,1^2-3^,1^2-3^4-5^,1^2-3^4-5^6-7^,1^2-3^6-7^,1^2-7^,1^4-5^,3^	8	ENSG00000129197	RPAIN	protein_coding	CDS.DOM	D8.event2634.3	Known-Coding	0.000421	1	0.173023	0.165896	91.87, 85.62, 83.81, 78.88, 77.32	81.69, 67.42, 63.24, 62.51, 62.39, 61.72	548.86, 510.04, 490.73, 490.37, 476.64	454.59, 396.4, 380.23, 367.51, 363.42, 343.73
ir.D8.event2634	17	+	5422769	5432542	D8.event2634.1,D8.event2634.2,D8.event2634.3,D8.event2634.4,D8.event2634.5,D8.event2634.6,D8.event2634.7,D8.event2634.8	5422829^,5422829^5425971-5426082^,5422829^5425971-5426082^5426236-5426299^,5422829^5425971-5426082^5426236-5426299^5428071-5428211^,5422829^5425971-5426082^5428071-5428211^,5422829^5425971-5428211^,5422829^5426236-5426299^,5426082^	1^,1^2-3^,1^2-3^4-5^,1^2-3^4-5^6-7^,1^2-3^6-7^,1^2-7^,1^4-5^,3^	8	ENSG00000129197	RPAIN	protein_coding	CDS.DOM	D8.event2634.4	Known-Coding	0.000421	1	0.231703	0.223763	117.21, 116.94, 114.28, 107.46, 107.24	112.09, 96.71, 84.45, 82.45, 81.96, 76.62	548.86, 510.04, 490.73, 490.37, 476.64	454.59, 396.4, 380.23, 367.51, 363.42, 343.73
ir.D8.event2634	17	+	5422769	5432542	D8.event2634.1,D8.event2634.2,D8.event2634.3,D8.event2634.4,D8.event2634.5,D8.event2634.6,D8.event2634.7,D8.event2634.8	5422829^,5422829^5425971-5426082^,5422829^5425971-5426082^5426236-5426299^,5422829^5425971-5426082^5426236-5426299^5428071-5428211^,5422829^5425971-5426082^5428071-5428211^,5422829^5425971-5428211^,5422829^5426236-5426299^,5426082^	1^,1^2-3^,1^2-3^4-5^,1^2-3^4-5^6-7^,1^2-3^6-7^,1^2-7^,1^4-5^,3^	8	ENSG00000129197	RPAIN	protein_coding	CDS.DOM	D8.event2634.7	Known-Coding	0.000421	1	0.0842455	0.0807386	50.99, 42.43, 39, 35.87, 34.9	42.26, 33.99, 31.46, 29.95, 28.46, 28.14	548.86, 510.04, 490.73, 490.37, 476.64	454.59, 396.4, 380.23, 367.51, 363.42, 343.73
ir.D8.event2634	17	+	5422769	5432542	D8.event2634.1,D8.event2634.2,D8.event2634.3,D8.event2634.4,D8.event2634.5,D8.event2634.6,D8.event2634.7,D8.event2634.8	5422829^,5422829^5425971-5426082^,5422829^5425971-5426082^5426236-5426299^,5422829^5425971-5426082^5426236-5426299^5428071-5428211^,5422829^5425971-5426082^5428071-5428211^,5422829^5425971-5428211^,5422829^5426236-5426299^,5426082^	1^,1^2-3^,1^2-3^4-5^,1^2-3^4-5^6-7^,1^2-3^6-7^,1^2-7^,1^4-5^,3^	8	ENSG00000129197	RPAIN	protein_coding	CDS.DOM	D8.event2634.6	PTC_50_All	0.000421	1	0.117604	0.120863	64.78, 64.4, 60.94, 57.1, 56.95	56.56, 47.5, 44.57, 43.08, 41.52, 37.95	548.86, 510.04, 490.73, 490.37, 476.64	454.59, 396.4, 380.23, 367.51, 363.42, 343.73
ir.D8.event2634	17	+	5422769	5432542	D8.event2634.1,D8.event2634.2,D8.event2634.3,D8.event2634.4,D8.event2634.5,D8.event2634.6,D8.event2634.7,D8.event2634.8	5422829^,5422829^5425971-5426082^,5422829^5425971-5426082^5426236-5426299^,5422829^5425971-5426082^5426236-5426299^5428071-5428211^,5422829^5425971-5426082^5428071-5428211^,5422829^5425971-5428211^,5422829^5426236-5426299^,5426082^	1^,1^2-3^,1^2-3^4-5^,1^2-3^4-5^6-7^,1^2-3^6-7^,1^2-7^,1^4-5^,3^	8	ENSG00000129197	RPAIN	protein_coding	CDS.DOM	D8.event2634.5	Known-Coding	0.000421	1	0.0682341	0.0687821	40.78, 36.29, 36.27, 34.92, 24.84	35.26, 34.14, 26.41, 21.97, 20.75, 18.81	548.86, 510.04, 490.73, 490.37, 476.64	454.59, 396.4, 380.23, 367.51, 363.42, 343.73
ir.D5.event807	10	-	71820240	71825893	D5.event807.1,D5.event807.3,D5.event807.4,D5.event807.5	71825837^71822013-71821876^71820335-,71825837^71822007-71821876^71820335-,71825837^71822007-71821876^71820332-,71821876^71820335-	1^2-4^5-,1^3-4^5-,1^3-4^6-,4^5-	4	ENSG00000197746	PSAP	protein_coding	CDS.DOM	D5.event807.1	Known-Coding	0.00044	2.08e-05	0.0521145	0.0280232	44.38, 30.43, 29.5, 29.29, 29.05	74.96, 59.8, 56.44, 50.24, 48.37, 39.33	1257.65, 1245.57, 1136.13, 1114.31, 1092.09	1159.66, 1143.14, 1026.17, 1000.13, 993.77, 986.66
ir.D5.event807	10	-	71820240	71825893	D5.event807.1,D5.event807.3,D5.event807.4,D5.event807.5	71825837^71822013-71821876^71820335-,71825837^71822007-71821876^71820335-,71825837^71822007-71821876^71820332-,71821876^71820335-	1^2-4^5-,1^3-4^5-,1^3-4^6-,4^5-	4	ENSG00000197746	PSAP	protein_coding	CDS.DOM	D5.event807.3	Known-Coding	0.00044	0.0491342	0.811581	0.841539	1056.33, 1052.68, 951.86, 933.67, 925.59	939.5, 907.65, 829.43, 826.11, 813.71, 803.47	1257.65, 1245.57, 1136.13, 1114.31, 1092.09	1159.66, 1143.14, 1026.17, 1000.13, 993.77, 986.66
ir.D5.event807	10	-	71820240	71825893	D5.event807.1,D5.event807.3,D5.event807.4,D5.event807.5	71825837^71822013-71821876^71820335-,71825837^71822007-71821876^71820335-,71825837^71822007-71821876^71820332-,71821876^71820335-	1^2-4^5-,1^3-4^5-,1^3-4^6-,4^5-	4	ENSG00000197746	PSAP	protein_coding	CDS.DOM	D5.event807.5	PTC_50_All	0.00044	1	0.0955916	0.0912693	113.16, 109.72, 105.61, 102.18, 100.64	114.5, 107.81, 100.49, 93.6, 92.63, 92.24	1257.65, 1245.57, 1136.13, 1114.31, 1092.09	1159.66, 1143.14, 1026.17, 1000.13, 993.77, 986.66
ir.D5.event807	10	-	71820240	71825893	D5.event807.1,D5.event807.3,D5.event807.4,D5.event807.5	71825837^71822013-71821876^71820335-,71825837^71822007-71821876^71820335-,71825837^71822007-71821876^71820332-,71821876^71820335-	1^2-4^5-,1^3-4^5-,1^3-4^6-,4^5-	4	ENSG00000197746	PSAP	protein_coding	CDS.DOM	D5.event807.4	Known-Coding	0.00044	1	0.0407133	0.0391686	70.78, 49.09, 47.43, 32.76, 31.6	67.88, 49.33, 41.38, 40.26, 30.7, 29.7	1257.65, 1245.57, 1136.13, 1114.31, 1092.09	1159.66, 1143.14, 1026.17, 1000.13, 993.77, 986.66
D2.event10775	20	-	2461634	2462636	D2.event10775.1,D2.event10775.2	2461939-,2461793-	1-,2-	2	ENSG00000125835	SNRPB	protein_coding	CDS	D2.event10775.1	Known-Coding	0.00048	0	0.588438	0.635406	1294.5, 1167, 1118, 1070, 1006	1198, 1092.5, 1091.5, 1028.5, 1026.5, 919.5	2064, 1775, 1774, 1663.5, 1624.5	1971, 1860.5, 1807.5, 1771, 1753, 1633
D2.event10775	20	-	2461634	2462636	D2.event10775.1,D2.event10775.2	2461939-,2461793-	1-,2-	2	ENSG00000125835	SNRPB	protein_coding	CDS	D2.event10775.2	Known-Coding	0.00048	0	0.411562	0.364594	769.5, 657, 618.5, 607, 593.5	779, 773, 768, 726.5, 713.5, 679.5	2064, 1775, 1774, 1663.5, 1624.5	1971, 1860.5, 1807.5, 1771, 1753, 1633
ir.D5.event3587	2	+	271939	276980	D5.event3587.1,D5.event3587.2,D5.event3587.3,D5.event3587.4,D5.event3587.5	272037-272065^272192-272305^275140-275201^,272037-272150^,272037-272150^275140-275201^,272192-272305^275140-275201^,272192-275201^	1-2^4-5^6-7^,1-3^,1-3^6-7^,4-5^6-7^,4-7^	5	ENSG00000143727	ACP1	protein_coding	CDS.DOM	D5.event3587.3	Known-Coding	0.000481	2.43e-05	0.551084	0.498837	450.32, 403.62, 394.95, 390.75, 375.02	543.28, 514.16, 508.16, 495.23, 485.96, 427	892.32, 817.82, 802.94, 764.98, 760.65	971.47, 955.58, 890.25, 887.62, 883.54, 807.79
ir.D5.event3587	2	+	271939	276980	D5.event3587.1,D5.event3587.2,D5.event3587.3,D5.event3587.4,D5.event3587.5	272037-272065^272192-272305^275140-275201^,272037-272150^,272037-272150^275140-275201^,272192-272305^275140-275201^,272192-275201^	1-2^4-5^6-7^,1-3^,1-3^6-7^,4-5^6-7^,4-7^	5	ENSG00000143727	ACP1	protein_coding	CDS.DOM	D5.event3587.1	Known-NMD	0.000481	0.0315818	0.166638	0.193891	183.62, 158.46, 156.66, 143.85, 140.48	166.34, 152.04, 151.37, 148.91, 147.96, 132.6	892.32, 817.82, 802.94, 764.98, 760.65	971.47, 955.58, 890.25, 887.62, 883.54, 807.79
ir.D5.event3587	2	+	271939	276980	D5.event3587.1,D5.event3587.2,D5.event3587.3,D5.event3587.4,D5.event3587.5	272037-272065^272192-272305^275140-275201^,272037-272150^,272037-272150^275140-275201^,272192-272305^275140-275201^,272192-275201^	1-2^4-5^6-7^,1-3^,1-3^6-7^,4-5^6-7^,4-7^	5	ENSG00000143727	ACP1	protein_coding	CDS.DOM	D5.event3587.4	Known-Coding	0.000481	0.638154	0.164383	0.18396	159.57, 158.82, 144.81, 144.21, 135.55	165.78, 157.54, 146.83, 143.81, 137.86, 135.23	892.32, 817.82, 802.94, 764.98, 760.65	971.47, 955.58, 890.25, 887.62, 883.54, 807.79
ir.D5.event3587	2	+	271939	276980	D5.event3587.1,D5.event3587.2,D5.event3587.3,D5.event3587.4,D5.event3587.5	272037-272065^272192-272305^275140-275201^,272037-272150^,272037-272150^275140-275201^,272192-272305^275140-275201^,272192-275201^	1-2^4-5^6-7^,1-3^,1-3^6-7^,4-5^6-7^,4-7^	5	ENSG00000143727	ACP1	protein_coding	CDS.DOM	D5.event3587.5	PTC_50_All	0.000481	1	0.0730768	0.0801672	69.73, 66.62, 66.23, 65.44, 55.75	72.51, 71.49, 68.3, 65.05, 62.66, 54.33	892.32, 817.82, 802.94, 764.98, 760.65	971.47, 955.58, 890.25, 887.62, 883.54, 807.79
ir.D5.event3587	2	+	271939	276980	D5.event3587.1,D5.event3587.2,D5.event3587.3,D5.event3587.4,D5.event3587.5	272037-272065^272192-272305^275140-275201^,272037-272150^,272037-272150^275140-275201^,272192-272305^275140-275201^,272192-275201^	1-2^4-5^6-7^,1-3^,1-3^6-7^,4-5^6-7^,4-7^	5	ENSG00000143727	ACP1	protein_coding	CDS.DOM	D5.event3587.2	Known-Coding	0.000481	1	0.0448181	0.0431451	39.4, 38.44, 34.75, 32.94, 28.72	51.76, 46.54, 37.86, 36.56, 36.31, 32.82	892.32, 817.82, 802.94, 764.98, 760.65	971.47, 955.58, 890.25, 887.62, 883.54, 807.79
ir.D5.event5877	7	+	44796793	44799480	D5.event5877.1,D5.event5877.2,D5.event5877.3,D5.event5877.4,D5.event5877.5	44798748-44798814^44799247-44799277^44799392-,44798748-44798904^44799247-44799277^44799392-,44798748-44799277^44799392-,44799247-,44799247-44799277^44799392-	1-2^4-5^6-,1-3^4-5^6-,1-5^6-,4-,4-5^6-	5	ENSG00000196262	PPIA	protein_coding	CDS.DOM	D5.event5877.5	Known-Coding	0.000481	0.00021401	0.859105	0.840326	8523.73, 7998.24, 7302.49, 7292.83, 6753.39	8389.2, 7967.48, 7888.07, 7553.86, 6947.75, 6852.54	10091.08, 9313.16, 8790.8, 8706.86, 8145.46	9813.59, 9223.19, 9140.47, 8792.65, 8201, 7896.34
ir.D5.event5877	7	+	44796793	44799480	D5.event5877.1,D5.event5877.2,D5.event5877.3,D5.event5877.4,D5.event5877.5	44798748-44798814^44799247-44799277^44799392-,44798748-44798904^44799247-44799277^44799392-,44798748-44799277^44799392-,44799247-,44799247-44799277^44799392-	1-2^4-5^6-,1-3^4-5^6-,1-5^6-,4-,4-5^6-	5	ENSG00000196262	PPIA	protein_coding	CDS.DOM	D5.event5877.1	Known-Coding	0.000481	0.00188	0.0416705	0.0516598	538.06, 458.9, 451.21, 440.83, 433.64	430.7, 426.41, 357.48, 352.49, 335.98, 309.55	10091.08, 9313.16, 8790.8, 8706.86, 8145.46	9813.59, 9223.19, 9140.47, 8792.65, 8201, 7896.34
ir.D5.event5877	7	+	44796793	44799480	D5.event5877.1,D5.event5877.2,D5.event5877.3,D5.event5877.4,D5.event5877.5	44798748-44798814^44799247-44799277^44799392-,44798748-44798904^44799247-44799277^44799392-,44798748-44799277^44799392-,44799247-,44799247-44799277^44799392-	1-2^4-5^6-,1-3^4-5^6-,1-5^6-,4-,4-5^6-	5	ENSG00000196262	PPIA	protein_coding	CDS.DOM	D5.event5877.2	Known-Coding	0.000481	0.427904	0.0292788	0.0345791	352.96, 322.69, 312.37, 312.2, 255.02	289.27, 279.86, 270.72, 251.84, 242.28, 215.88	10091.08, 9313.16, 8790.8, 8706.86, 8145.46	9813.59, 9223.19, 9140.47, 8792.65, 8201, 7896.34
ir.D5.event5877	7	+	44796793	44799480	D5.event5877.1,D5.event5877.2,D5.event5877.3,D5.event5877.4,D5.event5877.5	44798748-44798814^44799247-44799277^44799392-,44798748-44798904^44799247-44799277^44799392-,44798748-44799277^44799392-,44799247-,44799247-44799277^44799392-	1-2^4-5^6-,1-3^4-5^6-,1-5^6-,4-,4-5^6-	5	ENSG00000196262	PPIA	protein_coding	CDS.DOM	D5.event5877.3	PTC_50_All	0.000481	1	0.0285471	0.0315409	316.49, 287.6, 277.84, 267.7, 265.23	279.86, 269.93, 262.24, 247.39, 234.7, 215.88	10091.08, 9313.16, 8790.8, 8706.86, 8145.46	9813.59, 9223.19, 9140.47, 8792.65, 8201, 7896.34
ir.D5.event5877	7	+	44796793	44799480	D5.event5877.1,D5.event5877.2,D5.event5877.3,D5.event5877.4,D5.event5877.5	44798748-44798814^44799247-44799277^44799392-,44798748-44798904^44799247-44799277^44799392-,44798748-44799277^44799392-,44799247-,44799247-44799277^44799392-	1-2^4-5^6-,1-3^4-5^6-,1-5^6-,4-,4-5^6-	5	ENSG00000196262	PPIA	protein_coding	CDS.DOM	D5.event5877.4	PTC_50_All	0.000481	1	0.0413991	0.0418939	446.23, 371.34, 361.03, 359.84, 345.5	433.97, 386.68, 363.2, 360.03, 349.51, 302.49	10091.08, 9313.16, 8790.8, 8706.86, 8145.46	9813.59, 9223.19, 9140.47, 8792.65, 8201, 7896.34
ir.D3.event423	1	-	35190694	35193148	D3.event423.1,D3.event423.2,D3.event423.3	,35192222^35191529-35191341^35190995-,35191341^35190995-	,1^2-3^4-,3^4-	3	ENSG00000116560	SFPQ	protein_coding	CDS.DOM	D3.event423.2	Known-Coding	0.000486721	0.000160149	0.744134	0.786089	756.54, 662, 632.37, 614.53, 582.88	533.78, 503.64, 477.75, 472.53, 465, 414.16	958.49, 831.33, 818.14, 777.93, 746.36	700.52, 685.99, 652.71, 632.61, 623.55, 557.23
ir.D3.event423	1	-	35190694	35193148	D3.event423.1,D3.event423.2,D3.event423.3	,35192222^35191529-35191341^35190995-,35191341^35190995-	,1^2-3^4-,3^4-	3	ENSG00000116560	SFPQ	protein_coding	CDS.DOM	D3.event423.3	PTC_50_All	0.000486721	0.0097408	0.224409	0.193169	182.15, 168.45, 152.42, 149.26, 145.94	162.03, 151.89, 144.83, 139.46, 139.19, 127.16	958.49, 831.33, 818.14, 777.93, 746.36	700.52, 685.99, 652.71, 632.61, 623.55, 557.23
ir.D3.event423	1	-	35190694	35193148	D3.event423.1,D3.event423.2,D3.event423.3	,35192222^35191529-35191341^35190995-,35191341^35190995-	,1^2-3^4-,3^4-	3	ENSG00000116560	SFPQ	protein_coding	CDS.DOM	D3.event423.1	PTC_50_All	0.000486721	0.0421368	0.0314566	0.0207422	19.8, 17.54, 17.32, 16.91, 14.14	23.07, 21.91, 20.62, 20.32, 19.36, 15.91	958.49, 831.33, 818.14, 777.93, 746.36	700.52, 685.99, 652.71, 632.61, 623.55, 557.23
ir.D3.event688	10	+	17235169	17236379	D3.event688.1,D3.event688.2,D3.event688.3	,17235389^17235846-,17235389^17235846-17235889^17236294-	,1^2-,1^2-3^4-	3	ENSG00000026025	VIM	protein_coding	CDS.DOM	D3.event688.3	Known-Coding	0.000486721	5.26e-05	0.899567	0.885891	5332.85, 4868.77, 4813.71, 4740.38, 4360.07	5560.51, 5277.17, 5264.34, 4964.57, 4735.05, 4033.6	6023.43, 5502.59, 5432.07, 5373.47, 4890.16	6170.35, 5891.24, 5857.81, 5519.98, 5249.52, 4476.58
ir.D3.event688	10	+	17235169	17236379	D3.event688.1,D3.event688.2,D3.event688.3	,17235389^17235846-,17235389^17235846-17235889^17236294-	,1^2-,1^2-3^4-	3	ENSG00000026025	VIM	protein_coding	CDS.DOM	D3.event688.2	Known-NMD	0.000486721	0.000762529	0.091439	0.102888	627.11, 571.61, 565.21, 558.46, 478.79	573.85, 551.34, 527.79, 504.03, 472.04, 403.64	6023.43, 5502.59, 5432.07, 5373.47, 4890.16	6170.35, 5891.24, 5857.81, 5519.98, 5249.52, 4476.58
ir.D3.event688	10	+	17235169	17236379	D3.event688.1,D3.event688.2,D3.event688.3	,17235389^17235846-,17235389^17235846-17235889^17236294-	,1^2-,1^2-3^4-	3	ENSG00000026025	VIM	protein_coding	CDS.DOM	D3.event688.1	Known-NMD	0.000486721	0.305321	0.00899363	0.0112208	67.88, 63.47, 62.21, 59.9, 51.3	58.5, 53.05, 52.85, 51.38, 42.43, 39.34	6023.43, 5502.59, 5432.07, 5373.47, 4890.16	6170.35, 5891.24, 5857.81, 5519.98, 5249.52, 4476.58
ir.D3.event2789	17	+	49506299	49512052	D3.event2789.1,D3.event2789.2,D3.event2789.3	,49506658^49510412-49510664^49511892-,49510664^49511892-	,1^2-3^4-,3^4-	3	ENSG00000064300	NGFR	protein_coding	CDS.DOM	D3.event2789.2	Known-Coding	0.000487999	6.27e-05	0.858934	0.8035	433.7, 396.23, 368.23, 328.76, 317.53	275.43, 267.95, 245.14, 237.25, 226.48, 209.46	533.54, 494.28, 453.64, 416.62, 397.44	319.19, 308.52, 285.19, 276.88, 263.64, 248.35
ir.D3.event2789	17	+	49506299	49512052	D3.event2789.1,D3.event2789.2,D3.event2789.3	,49506658^49510412-49510664^49511892-,49510664^49511892-	,1^2-3^4-,3^4-	3	ENSG00000064300	NGFR	protein_coding	CDS.DOM	D3.event2789.3	PTC_50_All	0.000487999	0.000662	0.133526	0.181423	92.63, 89.99, 79.74, 79.67, 74.43	41.76, 38.57, 38.05, 37.63, 36.06, 35.16	533.54, 494.28, 453.64, 416.62, 397.44	319.19, 308.52, 285.19, 276.88, 263.64, 248.35
ir.D3.event2789	17	+	49506299	49512052	D3.event2789.1,D3.event2789.2,D3.event2789.3	,49506658^49510412-49510664^49511892-,49510664^49511892-	,1^2-3^4-,3^4-	3	ENSG00000064300	NGFR	protein_coding	CDS.DOM	D3.event2789.1	PTC_50_All	0.000487999	0.41915	0.00753968	0.0150772	8.12, 8.06, 7.21, 5.74, 5.48	2.83, 2, 2, 2, 2, 2	533.54, 494.28, 453.64, 416.62, 397.44	319.19, 308.52, 285.19, 276.88, 263.64, 248.35
D4.event9474	2	+	101859864	101864930	D4.event9474.1,D4.event9474.2,D4.event9474.3,D4.event9474.4	,101860825-101860986^,101860825-101860986^101863821-101864051^,101863821-101864051^	,1-2^,1-2^3-4^,3-4^	4	ENSG00000071054	MAP4K4	protein_coding	CDS	D4.event9474.1	Known-Coding	0.000488	3.17e-05	0.593525	0.68074	263, 257, 233, 230, 195	139, 135, 122, 115, 110, 109	384.47, 379.47, 334.06, 326.66, 305.81	239.03, 218.74, 207.04, 195.41, 190.34, 179.38
D4.event9474	2	+	101859864	101864930	D4.event9474.1,D4.event9474.2,D4.event9474.3,D4.event9474.4	,101860825-101860986^,101860825-101860986^101863821-101864051^,101863821-101864051^	,1-2^,1-2^3-4^,3-4^	4	ENSG00000071054	MAP4K4	protein_coding	CDS	D4.event9474.2	Known-Coding	0.000488	0.0180162	0.157317	0.113859	43.86, 43.47, 40.53, 35.94, 33.23	39.95, 34.29, 31.75, 31, 30, 26.5	384.47, 379.47, 334.06, 326.66, 305.81	239.03, 218.74, 207.04, 195.41, 190.34, 179.38
D4.event9474	2	+	101859864	101864930	D4.event9474.1,D4.event9474.2,D4.event9474.3,D4.event9474.4	,101860825-101860986^,101860825-101860986^101863821-101864051^,101863821-101864051^	,1-2^,1-2^3-4^,3-4^	4	ENSG00000071054	MAP4K4	protein_coding	CDS	D4.event9474.3	Known-Coding	0.000488	0.621019	0.100574	0.0763203	30.99, 28.11, 27.5, 23.71, 21.76	25.38, 24.54, 19.33, 19.31, 19.13, 16.01	384.47, 379.47, 334.06, 326.66, 305.81	239.03, 218.74, 207.04, 195.41, 190.34, 179.38
D4.event9474	2	+	101859864	101864930	D4.event9474.1,D4.event9474.2,D4.event9474.3,D4.event9474.4	,101860825-101860986^,101860825-101860986^101863821-101864051^,101863821-101864051^	,1-2^,1-2^3-4^,3-4^	4	ENSG00000071054	MAP4K4	protein_coding	CDS	D4.event9474.4	Known-Coding	0.000488	1	0.148585	0.129081	50.5, 47.01, 42.78, 41.67, 41.41	34.7, 32.03, 31.62, 29.33, 28.2, 26.87	384.47, 379.47, 334.06, 326.66, 305.81	239.03, 218.74, 207.04, 195.41, 190.34, 179.38
ir.D5.event3463	19	-	9418631	9419299	D5.event3463.1,D5.event3463.2,D5.event3463.3,D5.event3463.4,D5.event3463.5	9419217^,9419051^,9419051^9418895-9418766^,9419051^9418895-9418762^,9418762^	1^,2^,2^3-4^,2^3-5^,5^	5	ENSG00000174652	ZNF266	protein_coding	UTR-5	D5.event3463.3	UTR-5	0.000584228	0.00662048	0.239934	0.102249	5, 4.9, 3.87, 3.87, 3.46	11.83, 9.38, 9.38, 8.49, 7.07, 7	49.41, 40.8, 40.68, 39.65, 35.82	53.1, 41.02, 35.79, 35.45, 28.08, 28.08
ir.D5.event3463	19	-	9418631	9419299	D5.event3463.1,D5.event3463.2,D5.event3463.3,D5.event3463.4,D5.event3463.5	9419217^,9419051^,9419051^9418895-9418766^,9419051^9418895-9418762^,9418762^	1^,2^,2^3-4^,2^3-5^,5^	5	ENSG00000174652	ZNF266	protein_coding	UTR-5	D5.event3463.2	UTR-5	0.000584228	0.307754	0.216684	0.334367	17, 14, 14, 12, 12	13, 10, 8, 7, 7, 3	49.41, 40.8, 40.68, 39.65, 35.82	53.1, 41.02, 35.79, 35.45, 28.08, 28.08
ir.D5.event3463	19	-	9418631	9419299	D5.event3463.1,D5.event3463.2,D5.event3463.3,D5.event3463.4,D5.event3463.5	9419217^,9419051^,9419051^9418895-9418766^,9419051^9418895-9418762^,9418762^	1^,2^,2^3-4^,2^3-5^,5^	5	ENSG00000174652	ZNF266	protein_coding	UTR-5	D5.event3463.1	Known-Coding	0.000584228	0.323471	0.137685	0.239872	14, 12, 11.5, 10, 2	9, 7, 6, 4, 2.5, 2	49.41, 40.8, 40.68, 39.65, 35.82	53.1, 41.02, 35.79, 35.45, 28.08, 28.08
ir.D5.event3463	19	-	9418631	9419299	D5.event3463.1,D5.event3463.2,D5.event3463.3,D5.event3463.4,D5.event3463.5	9419217^,9419051^,9419051^9418895-9418766^,9419051^9418895-9418762^,9418762^	1^,2^,2^3-4^,2^3-5^,5^	5	ENSG00000174652	ZNF266	protein_coding	UTR-5	D5.event3463.4	UTR-5	0.000584228	0.895109	0.190908	0.114412	6.63, 5.48, 4.47, 3.87, 3.16	10.95, 9.17, 6.32, 5.66, 5.29, 4.9	49.41, 40.8, 40.68, 39.65, 35.82	53.1, 41.02, 35.79, 35.45, 28.08, 28.08
ir.D5.event3463	19	-	9418631	9419299	D5.event3463.1,D5.event3463.2,D5.event3463.3,D5.event3463.4,D5.event3463.5	9419217^,9419051^,9419051^9418895-9418766^,9419051^9418895-9418762^,9418762^	1^,2^,2^3-4^,2^3-5^,5^	5	ENSG00000174652	ZNF266	protein_coding	UTR-5	D5.event3463.5	UTR-5	0.000584228	1	0.214789	0.2091	13.27, 8.94, 8.94, 6.71, 5.29	12, 10.1, 7.75, 7.75, 5.29, 4.69	49.41, 40.8, 40.68, 39.65, 35.82	53.1, 41.02, 35.79, 35.45, 28.08, 28.08
ir.D6.event5474	5	-	181237042	181239487	D6.event5474.1,D6.event5474.3,D6.event5474.4,D6.event5474.5,D6.event5474.6	181239177-181239067^,181239177-181239067^181238239-181238099^181237719-181237609^,181239177-181239067^181238239-181238099^181237719-181237609^181237319-181237225^,181239177-181239067^181238239-181237609^,181238239-181238099^181237719-181237609^	1-2^,1-2^3-4^5-6^,1-2^3-4^5-6^7-8^,1-2^3-6^,3-4^5-6^	5	ENSG00000204628	GNB2L1	protein_coding	CDS.DOM	D6.event5474.6	Known-Coding	0.000584228	0.000221196	0.123139	0.101861	965.61, 909.46, 908.78, 818.82, 661.72	974.48, 920.49, 916.22, 899.07, 882.49, 859.31	9185.6, 8593.83, 8427.68, 7864.34, 7666.55	7962.42, 7570.49, 7557.23, 7285.37, 7000.94, 6976.16
ir.D6.event5474	5	-	181237042	181239487	D6.event5474.1,D6.event5474.3,D6.event5474.4,D6.event5474.5,D6.event5474.6	181239177-181239067^,181239177-181239067^181238239-181238099^181237719-181237609^,181239177-181239067^181238239-181238099^181237719-181237609^181237319-181237225^,181239177-181239067^181238239-181237609^,181238239-181238099^181237719-181237609^	1-2^,1-2^3-4^5-6^,1-2^3-4^5-6^7-8^,1-2^3-6^,3-4^5-6^	5	ENSG00000204628	GNB2L1	protein_coding	CDS.DOM	D6.event5474.3	Known-Coding	0.000584228	0.280163	0.645459	0.664689	6194.85, 5718.05, 5439.16, 5200.33, 5193.13	5172.34, 4853.94, 4843.71, 4677.76, 4559.09, 4520.91	9185.6, 8593.83, 8427.68, 7864.34, 7666.55	7962.42, 7570.49, 7557.23, 7285.37, 7000.94, 6976.16
ir.D6.event5474	5	-	181237042	181239487	D6.event5474.1,D6.event5474.3,D6.event5474.4,D6.event5474.5,D6.event5474.6	181239177-181239067^,181239177-181239067^181238239-181238099^181237719-181237609^,181239177-181239067^181238239-181238099^181237719-181237609^181237319-181237225^,181239177-181239067^181238239-181237609^,181238239-181238099^181237719-181237609^	1-2^,1-2^3-4^5-6^,1-2^3-4^5-6^7-8^,1-2^3-6^,3-4^5-6^	5	ENSG00000204628	GNB2L1	protein_coding	CDS.DOM	D6.event5474.4	Known-Coding	0.000584228	1	0.048105	0.041708	445.35, 362.15, 348.42, 307.98, 282.07	418.69, 403.19, 353.96, 327.39, 319.67, 310.49	9185.6, 8593.83, 8427.68, 7864.34, 7666.55	7962.42, 7570.49, 7557.23, 7285.37, 7000.94, 6976.16
ir.D6.event5474	5	-	181237042	181239487	D6.event5474.1,D6.event5474.3,D6.event5474.4,D6.event5474.5,D6.event5474.6	181239177-181239067^,181239177-181239067^181238239-181238099^181237719-181237609^,181239177-181239067^181238239-181238099^181237719-181237609^181237319-181237225^,181239177-181239067^181238239-181237609^,181238239-181238099^181237719-181237609^	1-2^,1-2^3-4^5-6^,1-2^3-4^5-6^7-8^,1-2^3-6^,3-4^5-6^	5	ENSG00000204628	GNB2L1	protein_coding	CDS.DOM	D6.event5474.5	PTC_50_All	0.000584228	1	0.167326	0.173883	1540.38, 1473.88, 1450.88, 1419.15, 1358.85	1395.91, 1323, 1247.26, 1211.72, 1124.52, 1123.57	9185.6, 8593.83, 8427.68, 7864.34, 7666.55	7962.42, 7570.49, 7557.23, 7285.37, 7000.94, 6976.16
ir.D6.event5474	5	-	181237042	181239487	D6.event5474.1,D6.event5474.3,D6.event5474.4,D6.event5474.5,D6.event5474.6	181239177-181239067^,181239177-181239067^181238239-181238099^181237719-181237609^,181239177-181239067^181238239-181238099^181237719-181237609^181237319-181237225^,181239177-181239067^181238239-181237609^,181238239-181238099^181237719-181237609^	1-2^,1-2^3-4^5-6^,1-2^3-4^5-6^7-8^,1-2^3-6^,3-4^5-6^	5	ENSG00000204628	GNB2L1	protein_coding	CDS.DOM	D6.event5474.1	Known-Coding	0.000584228	1	0.0159717	0.0178598	182.83, 144.87, 143.97, 136.34, 130.97	159.44, 138.27, 118.81, 113.57, 112.85, 70.49	9185.6, 8593.83, 8427.68, 7864.34, 7666.55	7962.42, 7570.49, 7557.23, 7285.37, 7000.94, 6976.16
D2.event3662	12	+	55716717	55719091	D2.event3662.1,D2.event3662.2	,55716933-55717005^	,1-2^	2	ENSG00000135441	BLOC1S1	protein_coding	CDS.DOM	D2.event3662.1	Frameshift	0.000605	0	0.172225	0.0394341	3, 2, 2, 1, 0	17, 15, 13, 12, 7, 6	58.09, 47.13, 43.89, 39.32, 27.87	72.5, 67.97, 67.57, 66.64, 65.92, 65.63
D2.event3662	12	+	55716717	55719091	D2.event3662.1,D2.event3662.2	,55716933-55717005^	,1-2^	2	ENSG00000135441	BLOC1S1	protein_coding	CDS.DOM	D2.event3662.2	Frameshift	0.000605	0	0.827775	0.960566	58.09, 46.13, 40.89, 37.32, 25.87	61.97, 58.63, 57.5, 55.57, 52.92, 49.64	58.09, 47.13, 43.89, 39.32, 27.87	72.5, 67.97, 67.57, 66.64, 65.92, 65.63
D2.event1539	1	-	155256791	155258826	D2.event1539.1,D2.event1539.2	,155257657-155257498^155257386-155257285^	,1-2^3-4^	2	ENSG00000116521	SCAMP3	protein_coding	CDS.DOM	D2.event1539.1	Known-Coding	0.000689	0	0.0335415	0.103733	10, 9, 9, 8, 6	4, 3, 3, 3, 2, 2	86.29, 85.17, 82.88, 75.64, 74.92	91.71, 87.86, 84.88, 83.84, 82.54, 76.08
D2.event1539	1	-	155256791	155258826	D2.event1539.1,D2.event1539.2	,155257657-155257498^155257386-155257285^	,1-2^3-4^	2	ENSG00000116521	SCAMP3	protein_coding	CDS.DOM	D2.event1539.2	Known-Coding	0.000689	0	0.966458	0.896267	77.29, 76.88, 76.17, 66.92, 65.64	89.71, 85.86, 81.88, 80.84, 78.54, 73.08	86.29, 85.17, 82.88, 75.64, 74.92	91.71, 87.86, 84.88, 83.84, 82.54, 76.08
D2.event3007	11	-	10801087	10802049	D2.event3007.1,D2.event3007.2	,10801774-10801661^	,1-2^	2	ENSG00000110321	EIF4G2	protein_coding	UTR-3	D2.event3007.1	Known-Coding	0.000709	0	0.0777854	0.101801	181, 180, 179, 173.5, 157.5	137.5, 118.5, 114, 96.5, 87, 85	1808.5, 1735.59, 1720.84, 1660.62, 1641.87	1490.2, 1465.3, 1420.34, 1297.65, 1290.81, 1226.51
D2.event3007	11	-	10801087	10802049	D2.event3007.1,D2.event3007.2	,10801774-10801661^	,1-2^	2	ENSG00000110321	EIF4G2	protein_coding	UTR-3	D2.event3007.2	Known-Coding	0.000709	0	0.922215	0.898199	1635, 1554.59, 1541.84, 1503.12, 1461.87	1352.7, 1351.3, 1301.84, 1210.65, 1194.31, 1141.51	1808.5, 1735.59, 1720.84, 1660.62, 1641.87	1490.2, 1465.3, 1420.34, 1297.65, 1290.81, 1226.51
D4.event10736	20	+	58895684	58903585	D4.event10736.1,D4.event10736.2,D4.event10736.3,D4.event10736.4	58898941-58898985^58903528-,58898941-58898985^58903531-,58903528-,58903531-	1-2^3-,1-2^4-,3-,4-	4	ENSG00000087460	GNAS	protein_coding	CDS.DOM	D4.event10736.3	Known-Coding	0.000753	0.000930528	0.197041	0.229173	371, 352, 328, 326.5, 326.33	280.5, 276, 274.33, 250.5, 227, 223	1733.6, 1477.75, 1435.17, 1413.64, 1380.97	1472.45, 1351.37, 1306.53, 1276.78, 1228.11, 1137.76
D4.event10736	20	+	58895684	58903585	D4.event10736.1,D4.event10736.2,D4.event10736.3,D4.event10736.4	58898941-58898985^58903528-,58898941-58898985^58903531-,58903528-,58903531-	1-2^3-,1-2^4-,3-,4-	4	ENSG00000087460	GNAS	protein_coding	CDS.DOM	D4.event10736.2	Known-Coding	0.000753	0.157385	0.509466	0.483178	853.12, 740.17, 703.64, 651.41, 648.92	780.05, 676.95, 665.78, 660.14, 601.86, 576.68	1733.6, 1477.75, 1435.17, 1413.64, 1380.97	1472.45, 1351.37, 1306.53, 1276.78, 1228.11, 1137.76
D4.event10736	20	+	58895684	58903585	D4.event10736.1,D4.event10736.2,D4.event10736.3,D4.event10736.4	58898941-58898985^58903528-,58898941-58898985^58903531-,58903528-,58903531-	1-2^3-,1-2^4-,3-,4-	4	ENSG00000087460	GNAS	protein_coding	CDS.DOM	D4.event10736.1	Known-Coding	0.000753	0.700154	0.189089	0.172689	316.48, 248.2, 246.23, 242.58, 232.05	269.08, 267.9, 267.23, 232.5, 222.92, 210.08	1733.6, 1477.75, 1435.17, 1413.64, 1380.97	1472.45, 1351.37, 1306.53, 1276.78, 1228.11, 1137.76
D4.event10736	20	+	58895684	58903585	D4.event10736.1,D4.event10736.2,D4.event10736.3,D4.event10736.4	58898941-58898985^58903528-,58898941-58898985^58903531-,58903528-,58903531-	1-2^3-,1-2^4-,3-,4-	4	ENSG00000087460	GNAS	protein_coding	CDS.DOM	D4.event10736.4	Known-Coding	0.000753	1	0.104404	0.114961	193, 173.5, 167, 164, 157	148, 144, 137.5, 129, 128, 124	1733.6, 1477.75, 1435.17, 1413.64, 1380.97	1472.45, 1351.37, 1306.53, 1276.78, 1228.11, 1137.76
D2.event8510	19	+	38632496	38634993	D2.event8510.1,D2.event8510.2	,38632601-38632678^	,1-2^	2	ENSG00000178982	EIF3K	protein_coding	CDS.DOM	D2.event8510.1	Known-Coding	0.000762	0	0.162598	0.11554	78, 65, 59, 50, 49	97, 97, 92, 88, 78, 72	621.11, 550.13, 528.29, 466.39, 440.85	582.8, 559.27, 558.11, 534.52, 499.73, 491.16
D2.event8510	19	+	38632496	38634993	D2.event8510.1,D2.event8510.2	,38632601-38632678^	,1-2^	2	ENSG00000178982	EIF3K	protein_coding	CDS.DOM	D2.event8510.2	Known-Coding	0.000762	0	0.837402	0.88446	543.11, 485.13, 478.29, 407.39, 391.85	490.8, 470.11, 462.27, 456.52, 427.73, 394.16	621.11, 550.13, 528.29, 466.39, 440.85	582.8, 559.27, 558.11, 534.52, 499.73, 491.16
D4.event2162	10	-	34331344	34337426	D4.event2162.1,D4.event2162.2,D4.event2162.3,D4.event2162.4	34337365^34336243-34336199^,34337278^34336243-34336199^,34337275^,34337275^34336243-34336199^	1^4-5^,2^4-5^,3^,3^4-5^	4	ENSG00000148498	PARD3	protein_coding	CDS	D4.event2162.3	Known-Coding	0.000785	2.36e-05	0.102454	0.206661	23, 23, 22, 19, 17	17, 12, 12, 11, 10, 5	108.49, 102.15, 101.84, 97.58, 93.18	128.59, 115.97, 114.18, 111.07, 95.21, 88.93
D4.event2162	10	-	34331344	34337426	D4.event2162.1,D4.event2162.2,D4.event2162.3,D4.event2162.4	34337365^34336243-34336199^,34337278^34336243-34336199^,34337275^,34337275^34336243-34336199^	1^4-5^,2^4-5^,3^,3^4-5^	4	ENSG00000148498	PARD3	protein_coding	CDS	D4.event2162.4	Known-Coding	0.000785	0.609	0.566985	0.498708	54, 53.24, 50.44, 47.92, 45.37	74.57, 71.71, 66.14, 63.5, 50.91, 43.95	108.49, 102.15, 101.84, 97.58, 93.18	128.59, 115.97, 114.18, 111.07, 95.21, 88.93
D4.event2162	10	-	34331344	34337426	D4.event2162.1,D4.event2162.2,D4.event2162.3,D4.event2162.4	34337365^34336243-34336199^,34337278^34336243-34336199^,34337275^,34337275^34336243-34336199^	1^4-5^,2^4-5^,3^,3^4-5^	4	ENSG00000148498	PARD3	protein_coding	CDS	D4.event2162.1	Known-Coding	0.000785	1	0.140684	0.120956	13.78, 12.96, 12.96, 12, 9.17	22.62, 16.49, 14.05, 13.86, 13.23, 11.75	108.49, 102.15, 101.84, 97.58, 93.18	128.59, 115.97, 114.18, 111.07, 95.21, 88.93
D4.event2162	10	-	34331344	34337426	D4.event2162.1,D4.event2162.2,D4.event2162.3,D4.event2162.4	34337365^34336243-34336199^,34337278^34336243-34336199^,34337275^,34337275^34336243-34336199^	1^4-5^,2^4-5^,3^,3^4-5^	4	ENSG00000148498	PARD3	protein_coding	CDS	D4.event2162.2	Known-Coding	0.000785	1	0.189877	0.173675	20.71, 18.71, 16.43, 16.25, 15.3	24.19, 23.78, 22.61, 19.75, 19.44, 14.4	108.49, 102.15, 101.84, 97.58, 93.18	128.59, 115.97, 114.18, 111.07, 95.21, 88.93
ir.D5.event4156	20	+	58895612	58903585	D5.event4156.1,D5.event4156.2,D5.event4156.3,D5.event4156.4,D5.event4156.5	58895684^58898941-58898985^58903528-,58895684^58898941-58898985^58903531-,58895684^58903528-,58895684^58903531-,58898985^58903531-	1^2-3^4-,1^2-3^5-,1^4-,1^5-,3^5-	5	ENSG00000087460	GNAS	protein_coding	CDS.DOM	D5.event4156.3	Known-Coding	0.000817882	0.00147202	0.172824	0.200966	371, 352, 328, 326.5, 326.33	280.5, 276, 274.33, 250.5, 227, 223	1968.54, 1685.88, 1648.55, 1605.99, 1575.17	1676.06, 1549.48, 1497.07, 1464.23, 1395.52, 1279.68
ir.D5.event4156	20	+	58895612	58903585	D5.event4156.1,D5.event4156.2,D5.event4156.3,D5.event4156.4,D5.event4156.5	58895684^58898941-58898985^58903528-,58895684^58898941-58898985^58903531-,58895684^58903528-,58895684^58903531-,58898985^58903531-	1^2-3^4-,1^2-3^5-,1^4-,1^5-,3^5-	5	ENSG00000087460	GNAS	protein_coding	CDS.DOM	D5.event4156.2	Known-Coding	0.000817882	0.177378	0.464071	0.439005	882.77, 764.14, 728.43, 678.62, 672.38	810.5, 704.42, 690.66, 689.82, 627.17, 591.47	1968.54, 1685.88, 1648.55, 1605.99, 1575.17	1676.06, 1549.48, 1497.07, 1464.23, 1395.52, 1279.68
ir.D5.event4156	20	+	58895612	58903585	D5.event4156.1,D5.event4156.2,D5.event4156.3,D5.event4156.4,D5.event4156.5	58895684^58898941-58898985^58903528-,58895684^58898941-58898985^58903531-,58895684^58903528-,58895684^58903531-,58898985^58903531-	1^2-3^4-,1^2-3^5-,1^4-,1^5-,3^5-	5	ENSG00000087460	GNAS	protein_coding	CDS.DOM	D5.event4156.1	Known-Coding	0.000817882	0.936061	0.20653	0.190348	398.51, 317.63, 307.76, 304.18, 287.9	338.57, 333.31, 332.97, 293.86, 273.24, 258.66	1968.54, 1685.88, 1648.55, 1605.99, 1575.17	1676.06, 1549.48, 1497.07, 1464.23, 1395.52, 1279.68
ir.D5.event4156	20	+	58895612	58903585	D5.event4156.1,D5.event4156.2,D5.event4156.3,D5.event4156.4,D5.event4156.5	58895684^58898941-58898985^58903528-,58895684^58898941-58898985^58903531-,58895684^58903528-,58895684^58903531-,58898985^58903531-	1^2-3^4-,1^2-3^5-,1^4-,1^5-,3^5-	5	ENSG00000087460	GNAS	protein_coding	CDS.DOM	D5.event4156.4	Known-Coding	0.000817882	1	0.091558	0.100806	193, 173.5, 167, 164, 157	148, 144, 137.5, 129, 128, 124	1968.54, 1685.88, 1648.55, 1605.99, 1575.17	1676.06, 1549.48, 1497.07, 1464.23, 1395.52, 1279.68
ir.D5.event4156	20	+	58895612	58903585	D5.event4156.1,D5.event4156.2,D5.event4156.3,D5.event4156.4,D5.event4156.5	58895684^58898941-58898985^58903528-,58895684^58898941-58898985^58903531-,58895684^58903528-,58895684^58903531-,58898985^58903531-	1^2-3^4-,1^2-3^5-,1^4-,1^5-,3^5-	5	ENSG00000087460	GNAS	protein_coding	CDS.DOM	D5.event4156.5	PTC_50_All	0.000817882	1	0.0650176	0.0688741	123.26, 122.56, 119.16, 114.89, 103.61	102.49, 102.05, 101.51, 99.18, 91.78, 78.55	1968.54, 1685.88, 1648.55, 1605.99, 1575.17	1676.06, 1549.48, 1497.07, 1464.23, 1395.52, 1279.68
D6.event11079	21	-	39345274	39348292	D6.event11079.1,D6.event11079.2,D6.event11079.3,D6.event11079.4,D6.event11079.5,D6.event11079.6	,39347483-39347379^,39347483-39347379^39347292-39347247^39345958-39345830^,39347483-39347379^39345958-39345830^,39347478-39347379^,39345958-39345830^	,1-3^,1-3^4-5^6-7^,1-3^6-7^,2-3^,6-7^	6	ENSG00000205581	HMGN1	protein_coding	CDS	D6.event11079.6	Known-NMD	0.000829	5.36e-05	0.02485	0.0401212	58.92, 56.99, 56.08, 56, 51.85	45.09, 37.95, 34.79, 30.46, 24.8, 23.92	1599.43, 1374.29, 1359.48, 1335.89, 1316.4	1449.44, 1372.14, 1359.51, 1303.66, 1220.57, 1215.51
D6.event11079	21	-	39345274	39348292	D6.event11079.1,D6.event11079.2,D6.event11079.3,D6.event11079.4,D6.event11079.5,D6.event11079.6	,39347483-39347379^,39347483-39347379^39347292-39347247^39345958-39345830^,39347483-39347379^39345958-39345830^,39347478-39347379^,39345958-39345830^	,1-3^,1-3^4-5^6-7^,1-3^6-7^,2-3^,6-7^	6	ENSG00000205581	HMGN1	protein_coding	CDS	D6.event11079.1	Known-Coding	0.000829	0.488303	0.915468	0.90207	1451, 1243.67, 1218.33, 1210.25, 1179.25	1336.5, 1240.67, 1226.17, 1180, 1140.5, 1127.5	1599.43, 1374.29, 1359.48, 1335.89, 1316.4	1449.44, 1372.14, 1359.51, 1303.66, 1220.57, 1215.51
D6.event11079	21	-	39345274	39348292	D6.event11079.1,D6.event11079.2,D6.event11079.3,D6.event11079.4,D6.event11079.5,D6.event11079.6	,39347483-39347379^,39347483-39347379^39347292-39347247^39345958-39345830^,39347483-39347379^39345958-39345830^,39347478-39347379^,39345958-39345830^	,1-3^,1-3^4-5^6-7^,1-3^6-7^,2-3^,6-7^	6	ENSG00000205581	HMGN1	protein_coding	CDS	D6.event11079.2	Known-NMD	0.000829	1	0.0227888	0.0188341	32.5, 30.5, 25, 21.8, 21.6	38.83, 32.25, 31.83, 31.43, 24.68, 21.42	1599.43, 1374.29, 1359.48, 1335.89, 1316.4	1449.44, 1372.14, 1359.51, 1303.66, 1220.57, 1215.51
D6.event11079	21	-	39345274	39348292	D6.event11079.1,D6.event11079.2,D6.event11079.3,D6.event11079.4,D6.event11079.5,D6.event11079.6	,39347483-39347379^,39347483-39347379^39347292-39347247^39345958-39345830^,39347483-39347379^39345958-39345830^,39347478-39347379^,39345958-39345830^	,1-3^,1-3^4-5^6-7^,1-3^6-7^,2-3^,6-7^	6	ENSG00000205581	HMGN1	protein_coding	CDS	D6.event11079.4	Known-NMD	0.000829	1	0.0160065	0.0196224	30.99, 29.96, 29.87, 25.61, 20.41	28.81, 26.25, 22.4, 20.3, 17.69, 11.47	1599.43, 1374.29, 1359.48, 1335.89, 1316.4	1449.44, 1372.14, 1359.51, 1303.66, 1220.57, 1215.51
D6.event11079	21	-	39345274	39348292	D6.event11079.1,D6.event11079.2,D6.event11079.3,D6.event11079.4,D6.event11079.5,D6.event11079.6	,39347483-39347379^,39347483-39347379^39347292-39347247^39345958-39345830^,39347483-39347379^39345958-39345830^,39347478-39347379^,39345958-39345830^	,1-3^,1-3^4-5^6-7^,1-3^6-7^,2-3^,6-7^	6	ENSG00000205581	HMGN1	protein_coding	CDS	D6.event11079.5	Known-NMD	0.000829	1	0.0122038	0.0110017	20.49, 17.32, 16.75, 11.83, 10.36	20, 18.38, 17.59, 16.88, 13.36, 10.25	1599.43, 1374.29, 1359.48, 1335.89, 1316.4	1449.44, 1372.14, 1359.51, 1303.66, 1220.57, 1215.51
D6.event11079	21	-	39345274	39348292	D6.event11079.1,D6.event11079.2,D6.event11079.3,D6.event11079.4,D6.event11079.5,D6.event11079.6	,39347483-39347379^,39347483-39347379^39347292-39347247^39345958-39345830^,39347483-39347379^39345958-39345830^,39347478-39347379^,39345958-39345830^	,1-3^,1-3^4-5^6-7^,1-3^6-7^,2-3^,6-7^	6	ENSG00000205581	HMGN1	protein_coding	CDS	D6.event11079.3	Known-NMD	0.000829	1	0.00868279	0.00835088	15.62, 13.31, 12.23, 9.36, 7.64	18.34, 11.06, 10.74, 10.73, 9.75, 8.04	1599.43, 1374.29, 1359.48, 1335.89, 1316.4	1449.44, 1372.14, 1359.51, 1303.66, 1220.57, 1215.51
ir.D3.event293	1	+	203795706	203801575	D3.event293.1,D3.event293.2,D3.event293.3	203795794^,203795794^203796293-203796496^,203796601^	1^,1^2-3^,4^	3	ENSG00000058673	ZC3H11A	protein_coding	UTR-5	D3.event293.1	UTR-5	0.000877468	8e-05	0.506801	0.366937	44, 40.5, 35, 32, 25	81.5, 76, 71, 62, 56, 56	114.14, 96.63, 95.18, 90.19, 84.52	144.47, 141.34, 131.92, 127.06, 125.69, 122.87
ir.D3.event293	1	+	203795706	203801575	D3.event293.1,D3.event293.2,D3.event293.3	203795794^,203795794^203796293-203796496^,203796601^	1^,1^2-3^,4^	3	ENSG00000058673	ZC3H11A	protein_coding	UTR-5	D3.event293.2	UTR-5	0.000877468	0.0280773	0.395681	0.491831	55.86, 52.25, 45.23, 41.81, 41.26	59.16, 55.25, 52.38, 51.48, 49.23, 46.28	114.14, 96.63, 95.18, 90.19, 84.52	144.47, 141.34, 131.92, 127.06, 125.69, 122.87
ir.D3.event293	1	+	203795706	203801575	D3.event293.1,D3.event293.2,D3.event293.3	203795794^,203795794^203796293-203796496^,203796601^	1^,1^2-3^,4^	3	ENSG00000058673	ZC3H11A	protein_coding	UTR-5	D3.event293.3	UTR-5	0.000877468	0.452076	0.0975181	0.141231	17.71, 14.28, 13.42, 12.96, 9.38	15.81, 14.49, 14.46, 11.49, 11.18, 9.64	114.14, 96.63, 95.18, 90.19, 84.52	144.47, 141.34, 131.92, 127.06, 125.69, 122.87
D2.event12811	4	+	143440382	143459385	D2.event12811.1,D2.event12811.2	,143457680-143457769^	,1-2^	2	ENSG00000109458	GAB1	protein_coding	CDS	D2.event12811.1	Known-Coding	0.00088	0	0.699738	0.870009	50.5, 49, 49, 44, 42.5	24, 19, 19, 18, 16, 14	58.25, 57.37, 54.92, 52.83, 46.74	31.35, 27.49, 26.35, 26.07, 24.94, 21
D2.event12811	4	+	143440382	143459385	D2.event12811.1,D2.event12811.2	,143457680-143457769^	,1-2^	2	ENSG00000109458	GAB1	protein_coding	CDS	D2.event12811.2	Known-Coding	0.00088	0	0.300262	0.129991	8.83, 8.37, 7.75, 5.92, 4.24	9.49, 8.94, 7.35, 7.35, 7.07, 7	58.25, 57.37, 54.92, 52.83, 46.74	31.35, 27.49, 26.35, 26.07, 24.94, 21
D3.event9060	19	-	43623439	43625078	D3.event9060.1,D3.event9060.2,D3.event9060.3	,43624903-43624114^,43624242-43624114^	,1-3^,2-3^	3	ENSG00000105767	CADM4	protein_coding	CDS.DOM	D3.event9060.2	PTC_50_All	0.000913	0.000152908	0.183778	0.106115	57.11, 48.19, 36.46, 35.33, 29.5	28.67, 25.1, 21.63, 20.98, 19.44, 10.39	430.79, 403.13, 384.3, 366.89, 354.65	127.31, 117.97, 113.83, 112.66, 106.76, 106.63
D3.event9060	19	-	43623439	43625078	D3.event9060.1,D3.event9060.2,D3.event9060.3	,43624903-43624114^,43624242-43624114^	,1-3^,2-3^	3	ENSG00000105767	CADM4	protein_coding	CDS.DOM	D3.event9060.3	Known-Coding	0.000913	0.000154764	0.758794	0.846956	356.68, 349.67, 326.97, 312.15, 297.7	93.64, 92.37, 86.22, 85.85, 83.87, 78	430.79, 403.13, 384.3, 366.89, 354.65	127.31, 117.97, 113.83, 112.66, 106.76, 106.63
D3.event9060	19	-	43623439	43625078	D3.event9060.1,D3.event9060.2,D3.event9060.3	,43624903-43624114^,43624242-43624114^	,1-3^,2-3^	3	ENSG00000105767	CADM4	protein_coding	CDS.DOM	D3.event9060.1	Known-Coding	0.000913	1	0.057428	0.0469287	22, 21, 17, 17, 13	9, 7, 7, 7, 5, 4	430.79, 403.13, 384.3, 366.89, 354.65	127.31, 117.97, 113.83, 112.66, 106.76, 106.63
ir.D4.event3549	19	-	43622368	43625078	D4.event3549.1,D4.event3549.2,D4.event3549.3,D4.event3549.4	43624903-43624114^43623439-,43624242-,43624242-43624114^43623439-,43623439-	1-3^4-,2-,2-3^4-,4-	4	ENSG00000105767	CADM4	protein_coding	CDS.DOM	D4.event3549.1	PTC_50_All	0.00102608	0.00016754	0.165427	0.0961069	57.11, 48.19, 36.46, 35.33, 29.5	28.67, 25.1, 21.63, 20.98, 19.44, 10.39	477.52, 443.82, 426.71, 397.16, 396.98	138.62, 132.15, 128.02, 128.01, 119.12, 115.65
ir.D4.event3549	19	-	43622368	43625078	D4.event3549.1,D4.event3549.2,D4.event3549.3,D4.event3549.4	43624903-43624114^43623439-,43624242-,43624242-43624114^43623439-,43623439-	1-3^4-,2-,2-3^4-,4-	4	ENSG00000105767	CADM4	protein_coding	CDS.DOM	D4.event3549.3	Known-Coding	0.00102608	0.0012099	0.68255	0.766932	356.68, 349.67, 326.97, 312.15, 297.7	93.64, 92.37, 86.22, 85.85, 83.87, 78	477.52, 443.82, 426.71, 397.16, 396.98	138.62, 132.15, 128.02, 128.01, 119.12, 115.65
ir.D4.event3549	19	-	43622368	43625078	D4.event3549.1,D4.event3549.2,D4.event3549.3,D4.event3549.4	43624903-43624114^43623439-,43624242-,43624242-43624114^43623439-,43623439-	1-3^4-,2-,2-3^4-,4-	4	ENSG00000105767	CADM4	protein_coding	CDS.DOM	D4.event3549.4	Known-Coding	0.00102608	1	0.0514624	0.0422705	22, 21, 17, 17, 13	9, 7, 7, 7, 5, 4	477.52, 443.82, 426.71, 397.16, 396.98	138.62, 132.15, 128.02, 128.01, 119.12, 115.65
ir.D4.event3549	19	-	43622368	43625078	D4.event3549.1,D4.event3549.2,D4.event3549.3,D4.event3549.4	43624903-43624114^43623439-,43624242-,43624242-43624114^43623439-,43623439-	1-3^4-,2-,2-3^4-,4-	4	ENSG00000105767	CADM4	protein_coding	CDS.DOM	D4.event3549.2	Frameshift	0.00102608	1	0.100561	0.0946904	46.73, 42.41, 42.33, 40.69, 30.27	15.36, 14.18, 14.18, 12.49, 11.31, 8.89	477.52, 443.82, 426.71, 397.16, 396.98	138.62, 132.15, 128.02, 128.01, 119.12, 115.65
ir.D7.event4304	21	-	39345274	39348292	D7.event4304.1,D7.event4304.2,D7.event4304.3,D7.event4304.4,D7.event4304.5,D7.event4304.6	,39347483-39347379^,39347483-39347379^39347292-39347247^39345958-39345830^,39347483-39347379^39345958-39345830^,39347478-39347379^,39345958-39345830^	,1-3^,1-3^4-5^6-7^,1-3^6-7^,2-3^,6-7^	6	ENSG00000205581	HMGN1	protein_coding	CDS	D7.event4304.6	Known-NMD	0.00104426	8.23e-05	0.0248095	0.0401352	58.92, 57.25, 56.08, 56, 51.85	45.09, 37.95, 34.79, 30.46, 24.8, 23.92	1599.43, 1375.96, 1360.89, 1336.7, 1319.09	1452.77, 1375.39, 1360.02, 1304.3, 1222.42, 1218.04
ir.D7.event4304	21	-	39345274	39348292	D7.event4304.1,D7.event4304.2,D7.event4304.3,D7.event4304.4,D7.event4304.5,D7.event4304.6	,39347483-39347379^,39347483-39347379^39347292-39347247^39345958-39345830^,39347483-39347379^39345958-39345830^,39347478-39347379^,39345958-39345830^	,1-3^,1-3^4-5^6-7^,1-3^6-7^,2-3^,6-7^	6	ENSG00000205581	HMGN1	protein_coding	CDS	D7.event4304.1	Known-Coding	0.00104426	0.865932	0.914063	0.901179	1451, 1243.67, 1218.33, 1210.25, 1179.25	1336.5, 1240.67, 1226.17, 1180, 1140.5, 1127.5	1599.43, 1375.96, 1360.89, 1336.7, 1319.09	1452.77, 1375.39, 1360.02, 1304.3, 1222.42, 1218.04
ir.D7.event4304	21	-	39345274	39348292	D7.event4304.1,D7.event4304.2,D7.event4304.3,D7.event4304.4,D7.event4304.5,D7.event4304.6	,39347483-39347379^,39347483-39347379^39347292-39347247^39345958-39345830^,39347483-39347379^39345958-39345830^,39347478-39347379^,39345958-39345830^	,1-3^,1-3^4-5^6-7^,1-3^6-7^,2-3^,6-7^	6	ENSG00000205581	HMGN1	protein_coding	CDS	D7.event4304.4	Known-NMD	0.00104426	1	0.0159804	0.0196246	30.99, 29.96, 29.87, 25.69, 20.41	28.81, 26.25, 22.4, 20.3, 17.69, 11.47	1599.43, 1375.96, 1360.89, 1336.7, 1319.09	1452.77, 1375.39, 1360.02, 1304.3, 1222.42, 1218.04
ir.D7.event4304	21	-	39345274	39348292	D7.event4304.1,D7.event4304.2,D7.event4304.3,D7.event4304.4,D7.event4304.5,D7.event4304.6	,39347483-39347379^,39347483-39347379^39347292-39347247^39345958-39345830^,39347483-39347379^39345958-39345830^,39347478-39347379^,39345958-39345830^	,1-3^,1-3^4-5^6-7^,1-3^6-7^,2-3^,6-7^	6	ENSG00000205581	HMGN1	protein_coding	CDS	D7.event4304.2	Known-NMD	0.00104426	1	0.0227578	0.0188236	32.5, 30.5, 25, 21.8, 21.6	38.83, 32.25, 31.83, 31.43, 24.68, 21.42	1599.43, 1375.96, 1360.89, 1336.7, 1319.09	1452.77, 1375.39, 1360.02, 1304.3, 1222.42, 1218.04
ir.D7.event4304	21	-	39345274	39348292	D7.event4304.1,D7.event4304.2,D7.event4304.3,D7.event4304.4,D7.event4304.5,D7.event4304.6	,39347483-39347379^,39347483-39347379^39347292-39347247^39345958-39345830^,39347483-39347379^39345958-39345830^,39347478-39347379^,39345958-39345830^	,1-3^,1-3^4-5^6-7^,1-3^6-7^,2-3^,6-7^	6	ENSG00000205581	HMGN1	protein_coding	CDS	D7.event4304.5	Known-NMD	0.00104426	1	0.0121927	0.0109966	20.49, 17.32, 16.75, 11.83, 10.36	20, 18.38, 17.59, 16.88, 13.36, 10.25	1599.43, 1375.96, 1360.89, 1336.7, 1319.09	1452.77, 1375.39, 1360.02, 1304.3, 1222.42, 1218.04
ir.D7.event4304	21	-	39345274	39348292	D7.event4304.1,D7.event4304.2,D7.event4304.3,D7.event4304.4,D7.event4304.5,D7.event4304.6	,39347483-39347379^,39347483-39347379^39347292-39347247^39345958-39345830^,39347483-39347379^39345958-39345830^,39347478-39347379^,39345958-39345830^	,1-3^,1-3^4-5^6-7^,1-3^6-7^,2-3^,6-7^	6	ENSG00000205581	HMGN1	protein_coding	CDS	D7.event4304.3	Known-NMD	0.00104426	1	0.0101969	0.00924124	17.29, 14.58, 13.31, 10.77, 8.45	21.59, 13.27, 11.7, 11.6, 11.37, 11.24	1599.43, 1375.96, 1360.89, 1336.7, 1319.09	1452.77, 1375.39, 1360.02, 1304.3, 1222.42, 1218.04
D7.event17222	X	-	103677051	103685171	D7.event17222.1,D7.event17222.2,D7.event17222.3,D7.event17222.4,D7.event17222.5,D7.event17222.7	,103684729-103684681^103678651-103678499^,103684729-103684681^103678620-103678499^,103684729-103684681^103678600-103678499^,103678651-103678499^,103678600-103678499^	,1-2^3-6^,1-2^4-6^,1-2^5-6^,3-6^,5-6^	6	ENSG00000123562	MORF4L2	protein_coding	UTR-5	D7.event17222.5	UTR-5	0.00106	0.00102936	0.328566	0.289967	350.74, 327.83, 315.97, 315.8, 264.46	466.84, 443.34, 435.25, 407.29, 390.78, 370.39	1224.45, 1107.27, 1086.91, 1077.52, 934.46	1404.44, 1307.48, 1278.52, 1229.9, 1224.46, 1204.75
D7.event17222	X	-	103677051	103685171	D7.event17222.1,D7.event17222.2,D7.event17222.3,D7.event17222.4,D7.event17222.5,D7.event17222.7	,103684729-103684681^103678651-103678499^,103684729-103684681^103678620-103678499^,103684729-103684681^103678600-103678499^,103678651-103678499^,103678600-103678499^	,1-2^3-6^,1-2^4-6^,1-2^5-6^,3-6^,5-6^	6	ENSG00000123562	MORF4L2	protein_coding	UTR-5	D7.event17222.1	UTR-5	0.00106	0.856654	0.0163632	0.0228912	30, 27, 24, 23, 20	28, 23, 22, 21, 16, 15	1224.45, 1107.27, 1086.91, 1077.52, 934.46	1404.44, 1307.48, 1278.52, 1229.9, 1224.46, 1204.75
D7.event17222	X	-	103677051	103685171	D7.event17222.1,D7.event17222.2,D7.event17222.3,D7.event17222.4,D7.event17222.5,D7.event17222.7	,103684729-103684681^103678651-103678499^,103684729-103684681^103678620-103678499^,103684729-103684681^103678600-103678499^,103678651-103678499^,103678600-103678499^	,1-2^3-6^,1-2^4-6^,1-2^5-6^,3-6^,5-6^	6	ENSG00000123562	MORF4L2	protein_coding	UTR-5	D7.event17222.2	UTR-5	0.00106	0.898755	0.11533	0.130755	159, 144.25, 139.6, 138.17, 128.67	174.33, 150.86, 150.41, 139.38, 137.9, 129.35	1224.45, 1107.27, 1086.91, 1077.52, 934.46	1404.44, 1307.48, 1278.52, 1229.9, 1224.46, 1204.75
D7.event17222	X	-	103677051	103685171	D7.event17222.1,D7.event17222.2,D7.event17222.3,D7.event17222.4,D7.event17222.5,D7.event17222.7	,103684729-103684681^103678651-103678499^,103684729-103684681^103678620-103678499^,103684729-103684681^103678600-103678499^,103678651-103678499^,103678600-103678499^	,1-2^3-6^,1-2^4-6^,1-2^5-6^,3-6^,5-6^	6	ENSG00000123562	MORF4L2	protein_coding	UTR-5	D7.event17222.4	UTR-5	0.00106	0.898755	0.13194	0.147502	178.94, 165.01, 159.24, 149.04, 148.42	183.36, 172.26, 170.58, 170.21, 157.84, 154.58	1224.45, 1107.27, 1086.91, 1077.52, 934.46	1404.44, 1307.48, 1278.52, 1229.9, 1224.46, 1204.75
D7.event17222	X	-	103677051	103685171	D7.event17222.1,D7.event17222.2,D7.event17222.3,D7.event17222.4,D7.event17222.5,D7.event17222.7	,103684729-103684681^103678651-103678499^,103684729-103684681^103678620-103678499^,103684729-103684681^103678600-103678499^,103678651-103678499^,103678600-103678499^	,1-2^3-6^,1-2^4-6^,1-2^5-6^,3-6^,5-6^	6	ENSG00000123562	MORF4L2	protein_coding	UTR-5	D7.event17222.3	UTR-5	0.00106	1	0.0654837	0.0634659	86.97, 85.88, 63.61, 56.29, 52.56	99.15, 86.6, 84.7, 81.61, 81.41, 67.32	1224.45, 1107.27, 1086.91, 1077.52, 934.46	1404.44, 1307.48, 1278.52, 1229.9, 1224.46, 1204.75
D7.event17222	X	-	103677051	103685171	D7.event17222.1,D7.event17222.2,D7.event17222.3,D7.event17222.4,D7.event17222.5,D7.event17222.7	,103684729-103684681^103678651-103678499^,103684729-103684681^103678620-103678499^,103684729-103684681^103678600-103678499^,103678651-103678499^,103678600-103678499^	,1-2^3-6^,1-2^4-6^,1-2^5-6^,3-6^,5-6^	6	ENSG00000123562	MORF4L2	protein_coding	UTR-5	D7.event17222.7	UTR-5	0.00106	1	0.342318	0.34542	418.8, 391.66, 377.55, 376.15, 312	491.59, 453.06, 437.96, 424.28, 414.3, 397.62	1224.45, 1107.27, 1086.91, 1077.52, 934.46	1404.44, 1307.48, 1278.52, 1229.9, 1224.46, 1204.75
ir.D3.event6511	X	+	23783800	23785429	D3.event6511.1,D3.event6511.2,D3.event6511.3	,23783883^23784294-23784403^23785328-,23783883^23785328-	,1^2-3^4-,1^4-	3	ENSG00000130066	SAT1	protein_coding	CDS.DOM	D3.event6511.1	PTC_50_All	0.00129987	0.000122114	0.0967753	0.187186	29.75, 26.93, 25.1, 20.49, 18.97	12.63, 12.41, 11, 9, 8.94, 7.94	153.33, 140.23, 128.58, 120.95, 105.26	124.16, 124.02, 120.93, 107.24, 95.42, 70.36
ir.D3.event6511	X	+	23783800	23785429	D3.event6511.1,D3.event6511.2,D3.event6511.3	,23783883^23784294-23784403^23785328-,23783883^23785328-	,1^2-3^4-,1^4-	3	ENSG00000130066	SAT1	protein_coding	CDS.DOM	D3.event6511.3	Known-Coding	0.00129987	0.000677637	0.855248	0.761686	114, 113, 97, 94.5, 75.5	110.5, 104, 103, 94, 82, 56	153.33, 140.23, 128.58, 120.95, 105.26	124.16, 124.02, 120.93, 107.24, 95.42, 70.36
ir.D3.event6511	X	+	23783800	23785429	D3.event6511.1,D3.event6511.2,D3.event6511.3	,23783883^23784294-23784403^23785328-,23783883^23785328-	,1^2-3^4-,1^4-	3	ENSG00000130066	SAT1	protein_coding	CDS.DOM	D3.event6511.2	PTC_50_All	0.00129987	1	0.0479769	0.0511282	10.58, 7.48, 6.48, 5.74, 2.83	7.75, 6.93, 5.48, 4.58, 4.24, 1.73	153.33, 140.23, 128.58, 120.95, 105.26	124.16, 124.02, 120.93, 107.24, 95.42, 70.36
D2.event7244	17	+	68512142	68515394	D2.event7244.1,D2.event7244.2	,68514987-68515119^	,1-2^	2	ENSG00000108946	PRKAR1A	protein_coding	UTR-5	D2.event7244.2	UTR-5	0.0013	0	0.0816473	0.213232	12.96, 10.54, 7.94, 5.57, 4.24	9.17, 8.25, 7.48, 4.24, 4.12, 3.51	60.96, 36.19, 35.87, 30.49, 30.24	93.17, 86.12, 74.34, 72.4, 69.42, 58.32
D2.event7244	17	+	68512142	68515394	D2.event7244.1,D2.event7244.2	,68514987-68515119^	,1-2^	2	ENSG00000108946	PRKAR1A	protein_coding	UTR-5	D2.event7244.1	UTR-5	0.0013	0	0.918353	0.786768	48, 28.25, 26.25, 25.33, 24.67	84, 82, 70.83, 64.92, 61.17, 54.08	60.96, 36.19, 35.87, 30.49, 30.24	93.17, 86.12, 74.34, 72.4, 69.42, 58.32
D4.event739	1	+	184054863	184072827	D4.event739.1,D4.event739.2,D4.event739.3,D4.event739.4	,184072157-184072194^,184072157-184072298^,184072157-184072310^	,1-2^,1-3^,1-4^	4	ENSG00000198860	TSEN15	protein_coding	CDS.DOM	D4.event739.1	Known-Coding	0.00134	9.88e-05	0.150317	0.2602	54, 45, 42, 40, 31	21, 19, 18, 18, 15, 7.5	183.69, 178.49, 160.78, 150.77, 140.51	130.73, 121.99, 110.78, 109.63, 92.32, 89.9
D4.event739	1	+	184054863	184072827	D4.event739.1,D4.event739.2,D4.event739.3,D4.event739.4	,184072157-184072194^,184072157-184072298^,184072157-184072310^	,1-2^,1-3^,1-4^	4	ENSG00000198860	TSEN15	protein_coding	CDS.DOM	D4.event739.4	Known-Coding	0.00134	1	0.113848	0.0784668	19.18, 18.17, 9.41, 9.3, 8.15	24.74, 14.7, 12.08, 9.17, 7.81, 6.93	183.69, 178.49, 160.78, 150.77, 140.51	130.73, 121.99, 110.78, 109.63, 92.32, 89.9
D4.event739	1	+	184054863	184072827	D4.event739.1,D4.event739.2,D4.event739.3,D4.event739.4	,184072157-184072194^,184072157-184072298^,184072157-184072310^	,1-2^,1-3^,1-4^	4	ENSG00000198860	TSEN15	protein_coding	CDS.DOM	D4.event739.3	Known-Coding	0.00134	1	0.511616	0.45849	83.62, 80.38, 73.53, 72.21, 63.43	66.72, 61.71, 56.03, 55.32, 51.51, 43.82	183.69, 178.49, 160.78, 150.77, 140.51	130.73, 121.99, 110.78, 109.63, 92.32, 89.9
D4.event739	1	+	184054863	184072827	D4.event739.1,D4.event739.2,D4.event739.3,D4.event739.4	,184072157-184072194^,184072157-184072298^,184072157-184072310^	,1-2^,1-3^,1-4^	4	ENSG00000198860	TSEN15	protein_coding	CDS.DOM	D4.event739.2	Known-Coding	0.00134	1	0.224219	0.202843	39.9, 35.69, 32.95, 29.39, 26.93	25.5, 25.28, 25.1, 24.15, 23.52, 22.76	183.69, 178.49, 160.78, 150.77, 140.51	130.73, 121.99, 110.78, 109.63, 92.32, 89.9
ir.D2.event1636	12	-	56257283	56257911	D2.event1636.1,D2.event1636.2	,56257828^56257361-	,1^2-	2	ENSG00000139645	ANKRD52	protein_coding	CDS.DOM	D2.event1636.1	PTC_50_All	0.00139544	0	0.74197	0.602656	40, 40, 39, 30, 27	97, 89, 83, 79, 77.5, 72.5	69, 62, 62, 55, 44	120, 119, 117, 110, 105.5, 99.5
ir.D2.event1636	12	-	56257283	56257911	D2.event1636.1,D2.event1636.2	,56257828^56257361-	,1^2-	2	ENSG00000139645	ANKRD52	protein_coding	CDS.DOM	D2.event1636.2	Known-Coding	0.00139544	0	0.25803	0.397344	29, 25, 23, 22, 17	34, 31, 30, 28, 27, 23	69, 62, 62, 55, 44	120, 119, 117, 110, 105.5, 99.5
D4.event2217	10	-	71820240	71825837	D4.event2217.1,D4.event2217.3,D4.event2217.4	71822013-71821876^71820335-,71822007-71821876^71820335-,71822007-71821876^71820332-	1-3^4-,2-3^4-,2-3^5-	3	ENSG00000197746	PSAP	protein_coding	CDS.DOM	D4.event2217.1	Known-Coding	0.00142	0.000111018	0.0577345	0.0310264	44.38, 30.43, 29.5, 29.29, 29.05	74.96, 59.8, 56.44, 50.24, 48.37, 39.33	1144.49, 1135.85, 1033.95, 1013.67, 986.48	1044.64, 1035.33, 925.68, 907.5, 900.17, 894.42
D4.event2217	10	-	71820240	71825837	D4.event2217.1,D4.event2217.3,D4.event2217.4	71822013-71821876^71820335-,71822007-71821876^71820335-,71822007-71821876^71820332-	1-3^4-,2-3^4-,2-3^5-	3	ENSG00000197746	PSAP	protein_coding	CDS.DOM	D4.event2217.3	Known-Coding	0.00142	0.0073841	0.897214	0.925846	1056.33, 1052.68, 951.86, 933.67, 925.59	939, 907.65, 829.43, 826.11, 813.71, 803.47	1144.49, 1135.85, 1033.95, 1013.67, 986.48	1044.64, 1035.33, 925.68, 907.5, 900.17, 894.42
D4.event2217	10	-	71820240	71825837	D4.event2217.1,D4.event2217.3,D4.event2217.4	71822013-71821876^71820335-,71822007-71821876^71820335-,71822007-71821876^71820332-	1-3^4-,2-3^4-,2-3^5-	3	ENSG00000197746	PSAP	protein_coding	CDS.DOM	D4.event2217.4	Known-Coding	0.00142	1	0.0450516	0.0431273	70.78, 49.09, 47.43, 32.76, 31.6	67.88, 49.33, 41.38, 40.26, 30.68, 29.7	1144.49, 1135.85, 1033.95, 1013.67, 986.48	1044.64, 1035.33, 925.68, 907.5, 900.17, 894.42
D2.event16919	X	+	71554592	71555954	D2.event16919.1,D2.event16919.2	,71555190-71555385^	,1-2^	2	ENSG00000147162	OGT	protein_coding	CDS.DOM	D2.event16919.1	Known-Coding	0.00142	0	0.104068	0.0497438	15, 13, 12, 10, 6	24, 22, 18, 18, 11, 9	264.96, 227.17, 222.82, 212.6, 205.22	178.92, 174.46, 174.33, 152.75, 149.92, 146.54
D2.event16919	X	+	71554592	71555954	D2.event16919.1,D2.event16919.2	,71555190-71555385^	,1-2^	2	ENSG00000147162	OGT	protein_coding	CDS.DOM	D2.event16919.2	Known-Coding	0.00142	0	0.895932	0.950256	249.96, 215.17, 212.82, 199.6, 199.22	156.46, 154.92, 152.33, 143.75, 135.54, 131.92	264.96, 227.17, 222.82, 212.6, 205.22	178.92, 174.46, 174.33, 152.75, 149.92, 146.54
D3.event3972	12	-	6849198	6849565	D3.event3972.1,D3.event3972.2,D3.event3972.3	,6849429-6849323^,6849413-6849323^	,1-3^,2-3^	3	ENSG00000111665	CDCA3	protein_coding	CDS	D3.event3972.1	Known-Coding	0.0016	0.000374793	0.0738486	0.141781	30, 20.5, 20, 17, 11	19.5, 17.5, 17, 16, 11, 10.5	152.41, 143.55, 137.7, 135.42, 122.94	236.89, 217.69, 208.77, 206.51, 195.51, 178.91
D3.event3972	12	-	6849198	6849565	D3.event3972.1,D3.event3972.2,D3.event3972.3	,6849429-6849323^,6849413-6849323^	,1-3^,2-3^	3	ENSG00000111665	CDCA3	protein_coding	CDS	D3.event3972.2	Known-Coding	0.0016	0.00350461	0.778629	0.693313	102.96, 100.5, 96.03, 90.49, 89.75	187.52, 166.5, 163.22, 161.99, 149.89, 139.98	152.41, 143.55, 137.7, 135.42, 122.94	236.89, 217.69, 208.77, 206.51, 195.51, 178.91
D3.event3972	12	-	6849198	6849565	D3.event3972.1,D3.event3972.2,D3.event3972.3	,6849429-6849323^,6849413-6849323^	,1-3^,2-3^	3	ENSG00000111665	CDCA3	protein_coding	CDS	D3.event3972.3	Known-Coding	0.0016	1	0.147523	0.164906	26.38, 25.17, 21.45, 20.59, 20.2	38.03, 35.78, 34.19, 29.87, 27.29, 18.52	152.41, 143.55, 137.7, 135.42, 122.94	236.89, 217.69, 208.77, 206.51, 195.51, 178.91
ir.D2.event4448	22	-	29340656	29341760	D2.event4448.1,D2.event4448.2	,29341501^29340857-	,1^2-	2	ENSG00000100280	AP1B1	protein_coding	CDS.DOM	D2.event4448.2	Known-Coding	0.00170729	0	0.466063	0.596291	79, 55, 50, 45, 33	125, 118, 117, 105, 87, 83	121, 92, 85, 72, 68	258, 239, 232, 228, 218, 186
ir.D2.event4448	22	-	29340656	29341760	D2.event4448.1,D2.event4448.2	,29341501^29340857-	,1^2-	2	ENSG00000100280	AP1B1	protein_coding	CDS.DOM	D2.event4448.1	PTC_50_All	0.00170729	0	0.533937	0.403709	42, 37, 35, 35, 27	141, 133, 121, 115, 113, 103	121, 92, 85, 72, 68	258, 239, 232, 228, 218, 186
D2.event10419	2	-	200859746	200861238	D2.event10419.1,D2.event10419.2	,200860215-200860125^	,1-2^	2	ENSG00000013441	CLK1	protein_coding	CDS.DOM	D2.event10419.1	Known-Coding	0.00181	0	0.400916	0.265756	29, 26, 23, 22, 19	27, 26, 25, 23, 22, 19	109.82, 92.88, 86.4, 80.45, 78.23	66.69, 64.34, 62.47, 61.92, 53.5, 45.27
D2.event10419	2	-	200859746	200861238	D2.event10419.1,D2.event10419.2	,200860215-200860125^	,1-2^	2	ENSG00000013441	CLK1	protein_coding	CDS.DOM	D2.event10419.2	Known-Coding	0.00181	0	0.599084	0.734244	80.82, 67.4, 66.88, 57.45, 56.23	40.69, 39.47, 37.34, 36.92, 31.5, 26.27	109.82, 92.88, 86.4, 80.45, 78.23	66.69, 64.34, 62.47, 61.92, 53.5, 45.27
D2.event1586	1	-	156951699	156955703	D2.event1586.1,D2.event1586.2	,156954921-156954892^	,1-2^	2	ENSG00000132694	ARHGEF11	protein_coding	CDS	D2.event1586.1	Known-Coding	0.00181	0	0.0887296	0.222066	27, 17, 16, 15, 13	12, 5, 4, 4, 2, 1	95.35, 83.99, 73.44, 72.5, 70.99	68.39, 54.5, 49.5, 47.99, 44.42, 40.88
D2.event1586	1	-	156951699	156955703	D2.event1586.1,D2.event1586.2	,156954921-156954892^	,1-2^	2	ENSG00000132694	ARHGEF11	protein_coding	CDS	D2.event1586.2	Known-Coding	0.00181	0	0.91127	0.777934	68.35, 67.99, 59.5, 56.44, 55.99	56.39, 50.5, 48.5, 43.99, 39.42, 38.88	95.35, 83.99, 73.44, 72.5, 70.99	68.39, 54.5, 49.5, 47.99, 44.42, 40.88
D2.event4012	12	-	22457161	22469709	D2.event4012.1,D2.event4012.2	,22459542-22459492^22458585-22458484^	,1-2^3-4^	2	ENSG00000111731	C2CD5	protein_coding	CDS	D2.event4012.2	Known-Coding	0.00181	0	0.402356	0.194517	8.24, 8.04, 6.32, 4.48, 3.78	15.47, 11.97, 11.29, 11.06, 10.8, 6.69	37.04, 36.24, 35.32, 29.48, 20.78	35.47, 31.06, 30.8, 24.29, 23.69, 21.97
D2.event4012	12	-	22457161	22469709	D2.event4012.1,D2.event4012.2	,22459542-22459492^22458585-22458484^	,1-2^3-4^	2	ENSG00000111731	C2CD5	protein_coding	CDS	D2.event4012.1	Known-Coding	0.00181	0	0.597644	0.805483	29, 29, 28, 25, 17	20, 20, 20, 17, 13, 10	37.04, 36.24, 35.32, 29.48, 20.78	35.47, 31.06, 30.8, 24.29, 23.69, 21.97
ir.D4.event4724	3	+	186787882	186789881	D4.event4724.1,D4.event4724.2,D4.event4724.3,D4.event4724.4	186788310-,186788310-186788416^186789125-,186788310-186788420^186789125-,186789125-	1-,1-2^4-,1-3^4-,4-	4	ENSG00000156976	EIF4A2	protein_coding	CDS.DOM	D4.event4724.4	Known-Coding	0.00188166	0.000775733	0.347932	0.291445	202, 189, 184, 183.5, 164.5	321.5, 291.5, 286.5, 236, 233.5, 218	668.24, 656.45, 647.95, 602.95, 590.21	837.37, 832.51, 753.25, 735.78, 699.86, 695.29
ir.D4.event4724	3	+	186787882	186789881	D4.event4724.1,D4.event4724.2,D4.event4724.3,D4.event4724.4	186788310-,186788310-186788416^186789125-,186788310-186788420^186789125-,186789125-	1-,1-2^4-,1-3^4-,4-	4	ENSG00000156976	EIF4A2	protein_coding	CDS.DOM	D4.event4724.1	Frameshift	0.00188166	0.00480698	0.26968	0.31881	213.21, 205.88, 205.18, 197.22, 187.88	225.84, 223.53, 219.99, 199.18, 181.33, 177.41	668.24, 656.45, 647.95, 602.95, 590.21	837.37, 832.51, 753.25, 735.78, 699.86, 695.29
ir.D4.event4724	3	+	186787882	186789881	D4.event4724.1,D4.event4724.2,D4.event4724.3,D4.event4724.4	186788310-,186788310-186788416^186789125-,186788310-186788420^186789125-,186789125-	1-,1-2^4-,1-3^4-,4-	4	ENSG00000156976	EIF4A2	protein_coding	CDS.DOM	D4.event4724.3	PTC_50_All	0.00188166	1	0.203196	0.209394	143.29, 138.71, 136.52, 126.04, 118.29	175.69, 168.17, 159.43, 153.62, 147.83, 120.24	668.24, 656.45, 647.95, 602.95, 590.21	837.37, 832.51, 753.25, 735.78, 699.86, 695.29
ir.D4.event4724	3	+	186787882	186789881	D4.event4724.1,D4.event4724.2,D4.event4724.3,D4.event4724.4	186788310-,186788310-186788416^186789125-,186788310-186788420^186789125-,186789125-	1-,1-2^4-,1-3^4-,4-	4	ENSG00000156976	EIF4A2	protein_coding	CDS.DOM	D4.event4724.2	Known-NMD	0.00188166	1	0.179192	0.180351	123.84, 116.45, 115.06, 110.2, 105.03	149.48, 146.65, 141.24, 134.7, 131.59, 111.14	668.24, 656.45, 647.95, 602.95, 590.21	837.37, 832.51, 753.25, 735.78, 699.86, 695.29
D2.event4648	13	-	37047936	37051488	D2.event4648.1,D2.event4648.2	,37048599-37048564^	,1-2^	2	ENSG00000102710	SUPT20H	protein_coding	CDS	D2.event4648.1	Known-Coding	0.00204	0	0.0957305	0.207908	24, 18, 16, 15, 12	11, 8, 7, 6, 6, 5	87.16, 84.83, 83.89, 76.99, 76.5	88.64, 80.94, 78, 75.99, 69.48, 61.96
D2.event4648	13	-	37047936	37051488	D2.event4648.1,D2.event4648.2	,37048599-37048564^	,1-2^	2	ENSG00000102710	SUPT20H	protein_coding	CDS	D2.event4648.2	Known-Coding	0.00204	0	0.90427	0.792092	71.89, 71.16, 61.99, 60.83, 58.5	80.64, 74.94, 72, 70.99, 58.48, 54.96	87.16, 84.83, 83.89, 76.99, 76.5	88.64, 80.94, 78, 75.99, 69.48, 61.96
D2.event7148	17	+	48892817	48893409	D2.event7148.1,D2.event7148.2	48892840^,48892910^	1^,2^	2	ENSG00000159199	ATP5G1	protein_coding	UTR-5	D2.event7148.1	UTR-5	0.00204	0	0.889752	0.949487	186, 182.5, 179.5, 166, 159	197.5, 190, 186.5, 178, 174.5, 144.5	194, 186.5, 185.5, 179, 175	224.5, 216.5, 207, 197, 195.5, 162.5
D2.event7148	17	+	48892817	48893409	D2.event7148.1,D2.event7148.2	48892840^,48892910^	1^,2^	2	ENSG00000159199	ATP5G1	protein_coding	UTR-5	D2.event7148.2	UTR-5	0.00204	0	0.110248	0.0505128	16, 13, 8, 6, 4	30, 27, 21, 19, 18, 17	194, 186.5, 185.5, 179, 175	224.5, 216.5, 207, 197, 195.5, 162.5
ir.D7.event317	1	+	225783368	225790466	D7.event317.1,D7.event317.2,D7.event317.3,D7.event317.4,D7.event317.5,D7.event317.6,D7.event317.7	225786862-,225786862-225786985^225787971-,225786862-225786985^225789240-,225786862-225786985^225789259-,225787971-,225789240-,225789259-	1-,1-2^3-,1-2^4-,1-2^5-,3-,4-,5-	7	ENSG00000143742	SRP9	protein_coding	CDS.DOM	D7.event317.6	Known-Coding	0.00208005	0.000655772	0.802008	0.762733	830, 799.5, 754.5, 733.5, 710	1128.5, 1052.5, 968.5, 901.5, 848.5, 825	1119.2, 1029.49, 982.94, 960.55, 925.39	1405.18, 1331.33, 1192.66, 1117.66, 1051.63, 1038.69
ir.D7.event317	1	+	225783368	225790466	D7.event317.1,D7.event317.2,D7.event317.3,D7.event317.4,D7.event317.5,D7.event317.6,D7.event317.7	225786862-,225786862-225786985^225787971-,225786862-225786985^225789240-,225786862-225786985^225789259-,225787971-,225789240-,225789259-	1-,1-2^3-,1-2^4-,1-2^5-,3-,4-,5-	7	ENSG00000143742	SRP9	protein_coding	CDS.DOM	D7.event317.5	In-Frame-Change	0.00208005	0.320372	0.0108376	0.0180792	27, 21, 18, 15, 10	19, 16, 13, 11, 10, 8	1119.2, 1029.49, 982.94, 960.55, 925.39	1405.18, 1331.33, 1192.66, 1117.66, 1051.63, 1038.69
ir.D7.event317	1	+	225783368	225790466	D7.event317.1,D7.event317.2,D7.event317.3,D7.event317.4,D7.event317.5,D7.event317.6,D7.event317.7	225786862-,225786862-225786985^225787971-,225786862-225786985^225789240-,225786862-225786985^225789259-,225787971-,225789240-,225789259-	1-,1-2^3-,1-2^4-,1-2^5-,3-,4-,5-	7	ENSG00000143742	SRP9	protein_coding	CDS.DOM	D7.event317.1	Frameshift	0.00208005	1	0.0345754	0.044716	57.86, 48.5, 42.73, 39.8, 35.47	51.31, 50.08, 38.25, 37.56, 37.47, 31.64	1119.2, 1029.49, 982.94, 960.55, 925.39	1405.18, 1331.33, 1192.66, 1117.66, 1051.63, 1038.69
ir.D7.event317	1	+	225783368	225790466	D7.event317.1,D7.event317.2,D7.event317.3,D7.event317.4,D7.event317.5,D7.event317.6,D7.event317.7	225786862-,225786862-225786985^225787971-,225786862-225786985^225789240-,225786862-225786985^225789259-,225787971-,225789240-,225789259-	1-,1-2^3-,1-2^4-,1-2^5-,3-,4-,5-	7	ENSG00000143742	SRP9	protein_coding	CDS.DOM	D7.event317.3	Known-Coding	0.00208005	1	0.0926641	0.107032	126.64, 111.34, 106.83, 99.5, 92.65	137.25, 129.89, 102.52, 101.86, 95.73, 94.1	1119.2, 1029.49, 982.94, 960.55, 925.39	1405.18, 1331.33, 1192.66, 1117.66, 1051.63, 1038.69
ir.D7.event317	1	+	225783368	225790466	D7.event317.1,D7.event317.2,D7.event317.3,D7.event317.4,D7.event317.5,D7.event317.6,D7.event317.7	225786862-,225786862-225786985^225787971-,225786862-225786985^225789240-,225786862-225786985^225789259-,225787971-,225789240-,225789259-	1-,1-2^3-,1-2^4-,1-2^5-,3-,4-,5-	7	ENSG00000143742	SRP9	protein_coding	CDS.DOM	D7.event317.2	Frameshift_PTC_50_Any	0.00208005	1	0.0110207	0.0164507	17.2, 17.15, 16.97, 15.78, 14.7	20.37, 15.2, 12.41, 10.82, 10.68, 8.83	1119.2, 1029.49, 982.94, 960.55, 925.39	1405.18, 1331.33, 1192.66, 1117.66, 1051.63, 1038.69
ir.D7.event317	1	+	225783368	225790466	D7.event317.1,D7.event317.2,D7.event317.3,D7.event317.4,D7.event317.5,D7.event317.6,D7.event317.7	225786862-,225786862-225786985^225787971-,225786862-225786985^225789240-,225786862-225786985^225789259-,225787971-,225789240-,225789259-	1-,1-2^3-,1-2^4-,1-2^5-,3-,4-,5-	7	ENSG00000143742	SRP9	protein_coding	CDS.DOM	D7.event317.4	Known-Coding	0.00208005	1	0.0196465	0.023006	36, 24.1, 21.07, 20.78, 14	32.45, 32.03, 30.4, 20.37, 17.66, 8.77	1119.2, 1029.49, 982.94, 960.55, 925.39	1405.18, 1331.33, 1192.66, 1117.66, 1051.63, 1038.69
ir.D7.event317	1	+	225783368	225790466	D7.event317.1,D7.event317.2,D7.event317.3,D7.event317.4,D7.event317.5,D7.event317.6,D7.event317.7	225786862-,225786862-225786985^225787971-,225786862-225786985^225789240-,225786862-225786985^225789259-,225787971-,225789240-,225789259-	1-,1-2^3-,1-2^4-,1-2^5-,3-,4-,5-	7	ENSG00000143742	SRP9	protein_coding	CDS.DOM	D7.event317.7	Known-Coding	0.00208005	1	0.0292477	0.027983	34, 29, 29, 27, 21	41, 39, 38, 34, 30, 26	1119.2, 1029.49, 982.94, 960.55, 925.39	1405.18, 1331.33, 1192.66, 1117.66, 1051.63, 1038.69
D2.event766	1	+	203795794	203801575	D2.event766.1,D2.event766.2	,203796293-203796496^	,1-2^	2	ENSG00000058673	ZC3H11A	protein_coding	UTR-5	D2.event766.2	UTR-5	0.00218	0	0.43623	0.572291	55.86, 52.25, 45.23, 41.81, 40.8	58.57, 53.95, 52.38, 51.48, 48.09, 46.28	99.86, 87.25, 81.3, 77.23, 66.81	132.98, 129.57, 122.28, 110.09, 109.95, 108.38
D2.event766	1	+	203795794	203801575	D2.event766.1,D2.event766.2	,203796293-203796496^	,1-2^	2	ENSG00000058673	ZC3H11A	protein_coding	UTR-5	D2.event766.1	UTR-5	0.00218	0	0.56377	0.427709	44, 40.5, 35, 32, 25	81.5, 76, 71, 62, 56, 56	99.86, 87.25, 81.3, 77.23, 66.81	132.98, 129.57, 122.28, 110.09, 109.95, 108.38
ir.D3.event2714	17	+	32365330	32367772	D3.event2714.1,D3.event2714.2,D3.event2714.3	32365487^,32365487^32366665-32366757^,32366757^	1^,1^2-3^,3^	3	ENSG00000010244	ZNF207	protein_coding	CDS	D3.event2714.1	Known-Coding	0.00226746	0.000203666	0.496176	0.556388	542.5, 487.5, 469, 455, 453	391.5, 341.5, 311, 305, 303, 292.5	993.68, 858.06, 853.57, 814.8, 805.88	716.74, 687.03, 675.13, 629.88, 610.62, 598.2
ir.D3.event2714	17	+	32365330	32367772	D3.event2714.1,D3.event2714.2,D3.event2714.3	32365487^,32365487^32366665-32366757^,32366757^	1^,1^2-3^,3^	3	ENSG00000010244	ZNF207	protein_coding	CDS	D3.event2714.2	Known-Coding	0.00226746	0.0018849	0.410986	0.359106	372.19, 313.77, 298, 293.71, 277.19	304.2, 301.62, 259.36, 255.27, 251.57, 237.91	993.68, 858.06, 853.57, 814.8, 805.88	716.74, 687.03, 675.13, 629.88, 610.62, 598.2
ir.D3.event2714	17	+	32365330	32367772	D3.event2714.1,D3.event2714.2,D3.event2714.3	32365487^,32365487^32366665-32366757^,32366757^	1^,1^2-3^,3^	3	ENSG00000010244	ZNF207	protein_coding	CDS	D3.event2714.3	PTC_50_All	0.00226746	1	0.0928382	0.084505	78.99, 75.69, 72.56, 70.8, 66.09	71.83, 68.51, 65.88, 54.13, 52.35, 50.47	993.68, 858.06, 853.57, 814.8, 805.88	716.74, 687.03, 675.13, 629.88, 610.62, 598.2
ir.D3.event1964	14	+	105466578	105469498	D3.event1964.1,D3.event1964.2,D3.event1964.3	105466707-,105466707-105466742^105469467-,105469467-	1-,1-2^3-,3-	3	ENSG00000182979	MTA1	protein_coding	CDS	D3.event1964.3	Known-Coding	0.00228479	0.0012504	0.484903	0.631666	41, 36, 32, 29, 29	56, 50, 46, 41, 39, 37	63.36, 54.54, 51.97, 50.34, 44.17	100.8, 99.05, 91.95, 90.14, 89.37, 83.44
ir.D3.event1964	14	+	105466578	105469498	D3.event1964.1,D3.event1964.2,D3.event1964.3	105466707-,105466707-105466742^105469467-,105469467-	1-,1-2^3-,3-	3	ENSG00000182979	MTA1	protein_coding	CDS	D3.event1964.2	Known-Coding	0.00228479	0.00151694	0.289409	0.166162	11.96, 9.95, 9.54, 6.48, 6	29.73, 28.46, 27.93, 27, 24.45, 22.98	63.36, 54.54, 51.97, 50.34, 44.17	100.8, 99.05, 91.95, 90.14, 89.37, 83.44
ir.D3.event1964	14	+	105466578	105469498	D3.event1964.1,D3.event1964.2,D3.event1964.3	105466707-,105466707-105466742^105469467-,105469467-	1-,1-2^3-,3-	3	ENSG00000182979	MTA1	protein_coding	CDS	D3.event1964.1	PTC_50_All	0.00228479	1	0.225688	0.202172	13, 12.41, 9.49, 9.38, 9.17	23.32, 21.91, 21.21, 20.35, 19.44, 18.97	63.36, 54.54, 51.97, 50.34, 44.17	100.8, 99.05, 91.95, 90.14, 89.37, 83.44
D2.event5115	14	+	105466578	105469467	D2.event5115.1,D2.event5115.2	,105466707-105466742^	,1-2^	2	ENSG00000182979	MTA1	protein_coding	CDS	D2.event5115.1	Known-Coding	0.00229	0	0.625434	0.791179	41, 36, 32, 29, 29	56, 50, 46, 41, 39, 37	50.95, 42.48, 41.54, 40.96, 35	80.45, 75.73, 72.98, 68.93, 67.46, 64
D2.event5115	14	+	105466578	105469467	D2.event5115.1,D2.event5115.2	,105466707-105466742^	,1-2^	2	ENSG00000182979	MTA1	protein_coding	CDS	D2.event5115.2	Known-Coding	0.00229	0	0.374566	0.208821	11.96, 9.95, 9.54, 6.48, 6	29.73, 28.46, 27.93, 27, 24.45, 22.98	50.95, 42.48, 41.54, 40.96, 35	80.45, 75.73, 72.98, 68.93, 67.46, 64
D2.event14778	7	+	6009498	6017814	D2.event14778.1,D2.event14778.2	,6015146-6015352^	,1-2^	2	ENSG00000106305	AIMP2	protein_coding	CDS	D2.event14778.2	Known-Coding	0.00243	0	0.887311	0.945224	127, 126.51, 117.12, 108.1, 100.05	159.2, 154.27, 143, 138.64, 137.91, 133.82	137, 132.51, 122.12, 116.1, 104.55	177.2, 176.27, 159, 157.64, 154.82, 151.91
D2.event14778	7	+	6009498	6017814	D2.event14778.1,D2.event14778.2	,6015146-6015352^	,1-2^	2	ENSG00000106305	AIMP2	protein_coding	CDS	D2.event14778.1	Known-Coding	0.00243	0	0.112689	0.0547758	10, 8, 6, 5, 4.5	22, 21, 19, 18, 16, 14	137, 132.51, 122.12, 116.1, 104.55	177.2, 176.27, 159, 157.64, 154.82, 151.91
ir.D4.event2239	15	-	68197628	68229502	D4.event2239.1,D4.event2239.2,D4.event2239.4	,68218650-68218536^,68218650-68214290^68211863-68211675^68211318-68211263^68209759-68209637^68208410-68205245^68205151-68205121^68199681-68199541^	,1-2^,1-3^4-5^6-7^8-9^10-11^12-13^14-15^	3	ENSG00000128973	CLN6	protein_coding	CDS.DOM	D4.event2239.4	PTC_50_All	0.00244432	0	0.572446	0.771518	29.19, 26.35, 24.96, 18.64, 17.29	22.26, 19.86, 19.47, 19.46, 19.31, 17.81	38.62, 35.93, 31.88, 27.95, 23.53	40.8, 39.09, 36.17, 35.88, 34.83, 34.66
ir.D4.event2239	15	-	68197628	68229502	D4.event2239.1,D4.event2239.2,D4.event2239.4	,68218650-68218536^,68218650-68214290^68211863-68211675^68211318-68211263^68209759-68209637^68208410-68205245^68205151-68205121^68199681-68199541^	,1-2^,1-3^4-5^6-7^8-9^10-11^12-13^14-15^	3	ENSG00000128973	CLN6	protein_coding	CDS.DOM	D4.event2239.2	In-Frame-Change	0.00244432	0	0.427554	0.228482	9.27, 8.31, 5.92, 5.74, 5.24	16.94, 16.02, 14.83, 13.86, 13.42, 13.19	38.62, 35.93, 31.88, 27.95, 23.53	40.8, 39.09, 36.17, 35.88, 34.83, 34.66
D2.event4738	13	-	95630113	95633234	D2.event4738.1,D2.event4738.2	,95630813-95630714^	,1-2^	2	ENSG00000134874	DZIP1	protein_coding	CDS	D2.event4738.2	Known-NMD	0.00247	0	0.0337073	0.0963735	9, 8.37, 6.93, 6.71, 5.29	5.29, 4, 3, 2.83, 2.83, 1.41	85.93, 83.71, 71.5, 71.37, 64.29	111, 110.79, 103.83, 88.83, 82.41, 78
D2.event4738	13	-	95630113	95633234	D2.event4738.1,D2.event4738.2	,95630813-95630714^	,1-2^	2	ENSG00000134874	DZIP1	protein_coding	CDS	D2.event4738.1	Known-Coding	0.00247	0	0.966293	0.903626	79, 77, 63, 62.5, 59	107, 105.5, 101, 86, 81, 75	85.93, 83.71, 71.5, 71.37, 64.29	111, 110.79, 103.83, 88.83, 82.41, 78
D2.event15443	7	-	101240906	101244960	D2.event15443.1,D2.event15443.2	,101244139-101244007^	,1-2^	2	ENSG00000214253	FIS1	protein_coding	CDS.DOM	D2.event15443.1	Known-Coding	0.0026	0	0.162886	0.0946197	21, 19.5, 17.5, 17, 11	39, 30, 29, 28, 23, 23	202.02, 188.68, 185.23, 169.02, 167.62	193.33, 190.08, 188.77, 175.83, 159.51, 149.71
D2.event15443	7	-	101240906	101244960	D2.event15443.1,D2.event15443.2	,101244139-101244007^	,1-2^	2	ENSG00000214253	FIS1	protein_coding	CDS.DOM	D2.event15443.2	Known-Coding	0.0026	0	0.837114	0.90538	184.52, 177.68, 165.73, 150.62, 148.02	165.77, 160.08, 154.33, 146.83, 131.51, 126.71	202.02, 188.68, 185.23, 169.02, 167.62	193.33, 190.08, 188.77, 175.83, 159.51, 149.71
D4.event6880	17	+	5426082	5432542	D4.event6880.1,D4.event6880.2,D4.event6880.3,D4.event6880.4	,5426236-5426299^,5426236-5426299^5428071-5428211^,5428071-5428211^	,1-2^,1-2^3-4^,3-4^	4	ENSG00000129197	RPAIN	protein_coding	CDS.DOM	D4.event6880.1	Known-Coding	0.00265	0.000114	0.0516268	0.108528	25, 24, 21, 20, 19	12, 9, 8, 6, 6, 6	211.29, 200.7, 198.09, 197.36, 196.92	194.4, 155.77, 154.91, 142.66, 134.52, 128.12
D4.event6880	17	+	5426082	5432542	D4.event6880.1,D4.event6880.2,D4.event6880.3,D4.event6880.4	,5426236-5426299^,5426236-5426299^5428071-5428211^,5428071-5428211^	,1-2^,1-2^3-4^,3-4^	4	ENSG00000129197	RPAIN	protein_coding	CDS.DOM	D4.event6880.3	Known-Coding	0.00265	1	0.546255	0.516119	107.88, 106.92, 106.06, 102.73, 94.78	106.19, 91.89, 78.28, 76.75, 74.53, 69.66	211.29, 200.7, 198.09, 197.36, 196.92	194.4, 155.77, 154.91, 142.66, 134.52, 128.12
D4.event6880	17	+	5426082	5432542	D4.event6880.1,D4.event6880.2,D4.event6880.3,D4.event6880.4	,5426236-5426299^,5426236-5426299^5428071-5428211^,5428071-5428211^	,1-2^,1-2^3-4^,3-4^	4	ENSG00000129197	RPAIN	protein_coding	CDS.DOM	D4.event6880.2	Known-Coding	0.00265	1	0.312529	0.286401	61.04, 59.77, 59.04, 57.07, 50.73	59.77, 47.73, 46.13, 44.73, 44.09, 42.07	211.29, 200.7, 198.09, 197.36, 196.92	194.4, 155.77, 154.91, 142.66, 134.52, 128.12
D4.event6880	17	+	5426082	5432542	D4.event6880.1,D4.event6880.2,D4.event6880.3,D4.event6880.4	,5426236-5426299^,5426236-5426299^5428071-5428211^,5428071-5428211^	,1-2^,1-2^3-4^,3-4^	4	ENSG00000129197	RPAIN	protein_coding	CDS.DOM	D4.event6880.4	Known-Coding	0.00265	1	0.089589	0.088952	22.09, 19.29, 18.81, 18.33, 10.82	19.9, 19.44, 14, 10.15, 9.7, 8.37	211.29, 200.7, 198.09, 197.36, 196.92	194.4, 155.77, 154.91, 142.66, 134.52, 128.12
ir.D3.event3436	19	-	2324125	2328477	D3.event3436.1,D3.event3436.2,D3.event3436.3	,2328387^2324196-,2328387^2324192-	,1^2-,1^3-	3	ENSG00000130332	LSM7	protein_coding	CDS.DOM	D3.event3436.2	Known-Coding	0.002751	0.000436	0.850938	0.814584	732, 634, 621, 603.5, 591	602, 574, 554, 517, 509, 464.5	877, 771, 768, 752, 737.5	703, 679, 655, 602, 600, 545.5
ir.D3.event3436	19	-	2324125	2328477	D3.event3436.1,D3.event3436.2,D3.event3436.3	,2328387^2324196-,2328387^2324192-	,1^2-,1^3-	3	ENSG00000130332	LSM7	protein_coding	CDS.DOM	D3.event3436.3	Known-Coding	0.002751	0.00534533	0.13609	0.165934	147, 131, 128, 124, 118	97, 93, 92, 84, 75, 74	877, 771, 768, 752, 737.5	703, 679, 655, 602, 600, 545.5
ir.D3.event3436	19	-	2324125	2328477	D3.event3436.1,D3.event3436.2,D3.event3436.3	,2328387^2324196-,2328387^2324192-	,1^2-,1^3-	3	ENSG00000130332	LSM7	protein_coding	CDS.DOM	D3.event3436.1	PTC_50_All	0.002751	0.422839	0.0129719	0.0194823	17, 16, 16, 14, 13	9, 9, 8, 8, 8, 7	877, 771, 768, 752, 737.5	703, 679, 655, 602, 600, 545.5
D2.event10514	2	-	241501708	241508443	D2.event10514.1,D2.event10514.2	,241508135-241508006^	,1-2^	2	ENSG00000115694	STK25	protein_coding	CDS.DOM	D2.event10514.1	Known-Coding	0.0028	0	0.503328	0.337258	17, 16, 14, 13, 12	57, 52, 49, 39, 37.5, 33	48.81, 46.3, 43.54, 43.13, 31.98	112.09, 104.4, 87.21, 81.32, 74.63, 71.79
D2.event10514	2	-	241501708	241508443	D2.event10514.1,D2.event10514.2	,241508135-241508006^	,1-2^	2	ENSG00000115694	STK25	protein_coding	CDS.DOM	D2.event10514.2	Known-Coding	0.0028	0	0.496672	0.662742	32.81, 30.13, 29.54, 29.3, 19.98	55.4, 55.09, 43.82, 38.79, 35.63, 35.21	48.81, 46.3, 43.54, 43.13, 31.98	112.09, 104.4, 87.21, 81.32, 74.63, 71.79
ir.D3.event1201	11	-	62853801	62854519	D3.event1201.1,D3.event1201.2,D3.event1201.3	62854064-,62854064-62854018^62853833-,62853833-	1-,1-2^3-,3-	3	ENSG00000255717	SNHG1	processed_transcript	Non-Coding	D3.event1201.3	Non-Coding	0.00280491	0.000322208	0.0273114	0.0472676	33, 31, 29.5, 24, 22.5	19.5, 19, 18, 15, 15, 10	658.39, 649.54, 577.85, 551.07, 525.01	673.43, 642.49, 626.63, 563.44, 533.33, 494.03
ir.D3.event1201	11	-	62853801	62854519	D3.event1201.1,D3.event1201.2,D3.event1201.3	62854064-,62854064-62854018^62853833-,62853833-	1-,1-2^3-,3-	3	ENSG00000255717	SNHG1	processed_transcript	Non-Coding	D3.event1201.1	Non-Coding	0.00280491	1	0.451319	0.433549	282.49, 282.12, 247.92, 244.06, 227.52	302.85, 298.53, 278, 250.19, 239.62, 225.48	658.39, 649.54, 577.85, 551.07, 525.01	673.43, 642.49, 626.63, 563.44, 533.33, 494.03
ir.D3.event1201	11	-	62853801	62854519	D3.event1201.1,D3.event1201.2,D3.event1201.3	62854064-,62854064-62854018^62853833-,62853833-	1-,1-2^3-,3-	3	ENSG00000255717	SNHG1	processed_transcript	Non-Coding	D3.event1201.2	Non-Coding	0.00280491	1	0.521369	0.519184	343.42, 342.9, 300.43, 276.01, 274.99	359.9, 329.13, 321.64, 304.82, 268.14, 258.55	658.39, 649.54, 577.85, 551.07, 525.01	673.43, 642.49, 626.63, 563.44, 533.33, 494.03
ir.D4.event4703	3	+	180970358	180976122	D4.event4703.1,D4.event4703.2,D4.event4703.3,D4.event4703.4	,180971075-180971155^180975313-180975404^,180971075-180975404^,180975313-180975404^	,1-2^3-4^,1-4^,3-4^	4	ENSG00000114416	FXR1	protein_coding	CDS.DOM	D4.event4703.1	Known-Coding	0.00280491	0.00463196	0.441731	0.514271	182, 175, 134, 129, 117	155, 131, 122, 116, 114, 114	339.49, 296.28, 277.34, 262.59, 255.97	321.22, 299.33, 295.45, 268.66, 259.82, 257.07
ir.D4.event4703	3	+	180970358	180976122	D4.event4703.1,D4.event4703.2,D4.event4703.3,D4.event4703.4	,180971075-180971155^180975313-180975404^,180971075-180975404^,180975313-180975404^	,1-2^3-4^,1-4^,3-4^	4	ENSG00000114416	FXR1	protein_coding	CDS.DOM	D4.event4703.2	Known-Coding	0.00280491	0.0295686	0.104808	0.0691979	24.57, 21.92, 20.86, 16.55, 14.98	35.36, 35.16, 29.85, 27.94, 25.64, 24.25	339.49, 296.28, 277.34, 262.59, 255.97	321.22, 299.33, 295.45, 268.66, 259.82, 257.07
ir.D4.event4703	3	+	180970358	180976122	D4.event4703.1,D4.event4703.2,D4.event4703.3,D4.event4703.4	,180971075-180971155^180975313-180975404^,180971075-180975404^,180975313-180975404^	,1-2^3-4^,1-4^,3-4^	4	ENSG00000114416	FXR1	protein_coding	CDS.DOM	D4.event4703.3	PTC_50_All	0.00280491	1	0.0954563	0.0753896	26.11, 22.7, 22.47, 18.64, 17.76	30.72, 27.62, 27.01, 26.42, 25.23, 25.11	339.49, 296.28, 277.34, 262.59, 255.97	321.22, 299.33, 295.45, 268.66, 259.82, 257.07
ir.D4.event4703	3	+	180970358	180976122	D4.event4703.1,D4.event4703.2,D4.event4703.3,D4.event4703.4	,180971075-180971155^180975313-180975404^,180971075-180975404^,180975313-180975404^	,1-2^3-4^,1-4^,3-4^	4	ENSG00000114416	FXR1	protein_coding	CDS.DOM	D4.event4703.4	Known-Coding	0.00280491	1	0.358005	0.341142	112.87, 102.26, 92.66, 91.78, 88.54	111.86, 111.45, 105.3, 101.47, 94.95, 84.21	339.49, 296.28, 277.34, 262.59, 255.97	321.22, 299.33, 295.45, 268.66, 259.82, 257.07
D2.event10649	20	+	34882989	34923323	D2.event10649.1,D2.event10649.2	,34913096-34913187^34913393-34913496^34913753-34913825^34914096-34914171^34914323-34914437^34919435-34919572^34920539-34920709^34921006-34921139^34921330-34921462^34921544-34921600^34921786-34921866^	,1-2^3-4^5-6^7-8^9-10^11-12^13-14^15-16^17-18^19-20^21-22^	2	ENSG00000131069	ACSS2	protein_coding	CDS.DOM	D2.event10649.2	Known-Coding	0.00286	0	0.872498	0.924023	191.8, 160.42, 158.32, 152.55, 151.94	261.08, 230.96, 217.98, 206.23, 200.04, 198.36	211.3, 173.42, 167.32, 166.55, 163.44	295.08, 269.96, 249.98, 234.73, 230.36, 226.54
D2.event10649	20	+	34882989	34923323	D2.event10649.1,D2.event10649.2	,34913096-34913187^34913393-34913496^34913753-34913825^34914096-34914171^34914323-34914437^34919435-34919572^34920539-34920709^34921006-34921139^34921330-34921462^34921544-34921600^34921786-34921866^	,1-2^3-4^5-6^7-8^9-10^11-12^13-14^15-16^17-18^19-20^21-22^	2	ENSG00000131069	ACSS2	protein_coding	CDS.DOM	D2.event10649.1	Known-Coding	0.00286	0	0.127502	0.0759772	19.5, 14, 13, 11.5, 9	39, 34, 32, 32, 28.5, 26.5	211.3, 173.42, 167.32, 166.55, 163.44	295.08, 269.96, 249.98, 234.73, 230.36, 226.54
D3.event17132	X	-	53220916	53224740	D3.event17132.1,D3.event17132.2,D3.event17132.3	,53221793-53221688^,53221730-53221688^	,1-3^,2-3^	3	ENSG00000126012	KDM5C	protein_coding	CDS	D3.event17132.2	Frameshift	0.00289	0.000238	0.0916107	0.178013	22.91, 18.89, 18.49, 16.31, 15.97	12.25, 11, 10, 8.94, 8.12, 6.71	114.3, 105.36, 102.79, 100.72, 96.85	116.47, 113.54, 111.1, 105.69, 88.75, 86.87
D3.event17132	X	-	53220916	53224740	D3.event17132.1,D3.event17132.2,D3.event17132.3	,53221793-53221688^,53221730-53221688^	,1-3^,2-3^	3	ENSG00000126012	KDM5C	protein_coding	CDS	D3.event17132.1	Known-Coding	0.00289	0.00909414	0.833842	0.751894	81, 81, 79, 76, 74	98, 95, 94, 90, 71, 71	114.3, 105.36, 102.79, 100.72, 96.85	116.47, 113.54, 111.1, 105.69, 88.75, 86.87
D3.event17132	X	-	53220916	53224740	D3.event17132.1,D3.event17132.2,D3.event17132.3	,53221793-53221688^,53221730-53221688^	,1-3^,2-3^	3	ENSG00000126012	KDM5C	protein_coding	CDS	D3.event17132.3	Known-NMD	0.00289	1	0.0745478	0.0700935	10.39, 10.39, 5.83, 5.48, 4.36	10.39, 9.22, 7.75, 7.42, 6.93, 4.69	114.3, 105.36, 102.79, 100.72, 96.85	116.47, 113.54, 111.1, 105.69, 88.75, 86.87
ir.D7.event3937	2	-	70224629	70229264	D7.event3937.2,D7.event3937.3,D7.event3937.4,D7.event3937.6,D7.event3937.7	70229091-70229059^70228462-70227735^,70229091-70229059^70227822-70227735^70225393-70225328^,70229091-70229059^70227822-70227735^,70229091-70228344^70227822-70227735^,70227822-70227735^	1-2^3-6^,1-2^5-6^,1-2^5-6^7-8^,1-4^5-6^,5-6^	5	ENSG00000116001	TIA1	protein_coding	CDS.DOM	D7.event3937.7	Known-Coding	0.00292542	6.43e-05	0.141901	0.193988	99.34, 90.38, 89.72, 87.68, 86.23	78.01, 66.58, 55.99, 53.24, 49.12, 47.41	532.82, 460.72, 458.33, 447.88, 437.26	458.14, 438.95, 437.55, 412.38, 383.27, 338.67
ir.D7.event3937	2	-	70224629	70229264	D7.event3937.2,D7.event3937.3,D7.event3937.4,D7.event3937.6,D7.event3937.7	70229091-70229059^70228462-70227735^,70229091-70229059^70227822-70227735^70225393-70225328^,70229091-70229059^70227822-70227735^,70229091-70228344^70227822-70227735^,70227822-70227735^	1-2^3-6^,1-2^5-6^,1-2^5-6^7-8^,1-4^5-6^,5-6^	5	ENSG00000116001	TIA1	protein_coding	CDS.DOM	D7.event3937.4	Known-Coding	0.00292542	1	0.420886	0.393306	201.63, 189.32, 182.81, 178.51, 166.89	188.46, 186.65, 179.08, 174.89, 172.73, 137.34	532.82, 460.72, 458.33, 447.88, 437.26	458.14, 438.95, 437.55, 412.38, 383.27, 338.67
ir.D7.event3937	2	-	70224629	70229264	D7.event3937.2,D7.event3937.3,D7.event3937.4,D7.event3937.6,D7.event3937.7	70229091-70229059^70228462-70227735^,70229091-70229059^70227822-70227735^70225393-70225328^,70229091-70229059^70227822-70227735^,70229091-70228344^70227822-70227735^,70227822-70227735^	1-2^3-6^,1-2^5-6^,1-2^5-6^7-8^,1-4^5-6^,5-6^	5	ENSG00000116001	TIA1	protein_coding	CDS.DOM	D7.event3937.2	PTC_50_All	0.00292542	1	0.154879	0.143512	80.07, 65.81, 64.69, 63.08, 61.74	76.88, 74.13, 66.1, 59.86, 54.56, 50.86	532.82, 460.72, 458.33, 447.88, 437.26	458.14, 438.95, 437.55, 412.38, 383.27, 338.67
ir.D7.event3937	2	-	70224629	70229264	D7.event3937.2,D7.event3937.3,D7.event3937.4,D7.event3937.6,D7.event3937.7	70229091-70229059^70228462-70227735^,70229091-70229059^70227822-70227735^70225393-70225328^,70229091-70229059^70227822-70227735^,70229091-70228344^70227822-70227735^,70227822-70227735^	1-2^3-6^,1-2^5-6^,1-2^5-6^7-8^,1-4^5-6^,5-6^	5	ENSG00000116001	TIA1	protein_coding	CDS.DOM	D7.event3937.3	Known-NMD	0.00292542	1	0.106085	0.0984286	60.44, 52.1, 40.59, 40.31, 36.59	52.94, 44.13, 42.87, 42.39, 41.42, 38.17	532.82, 460.72, 458.33, 447.88, 437.26	458.14, 438.95, 437.55, 412.38, 383.27, 338.67
ir.D7.event3937	2	-	70224629	70229264	D7.event3937.2,D7.event3937.3,D7.event3937.4,D7.event3937.6,D7.event3937.7	70229091-70229059^70228462-70227735^,70229091-70229059^70227822-70227735^70225393-70225328^,70229091-70229059^70227822-70227735^,70229091-70228344^70227822-70227735^,70227822-70227735^	1-2^3-6^,1-2^5-6^,1-2^5-6^7-8^,1-4^5-6^,5-6^	5	ENSG00000116001	TIA1	protein_coding	CDS.DOM	D7.event3937.6	PTC_50_All	0.00292542	1	0.176248	0.170765	91.34, 82.09, 77.72, 75.28, 72.65	85.62, 76.03, 72.53, 71.61, 66.18, 63.18	532.82, 460.72, 458.33, 447.88, 437.26	458.14, 438.95, 437.55, 412.38, 383.27, 338.67
D3.event12014	3	-	3174261	3179621	D3.event12014.1,D3.event12014.2	,3175269-3175163^	,1-2^	2	ENSG00000113851	CRBN	protein_coding	CDS	D3.event12014.1	Known-Coding	0.00294	0	0.0624969	0.169867	14, 13, 11, 8, 8	5, 4, 3, 2, 2, 2	68.69, 67.05, 63.68, 60.12, 59.21	67.24, 59.26, 45.95, 44.43, 38.14, 37.64
D3.event12014	3	-	3174261	3179621	D3.event12014.1,D3.event12014.2	,3175269-3175163^	,1-2^	2	ENSG00000113851	CRBN	protein_coding	CDS	D3.event12014.2	Known-Coding	0.00294	0	0.937503	0.830133	57.69, 55.68, 53.05, 51.21, 47.12	65.24, 54.26, 42.95, 42.43, 35.64, 34.14	68.69, 67.05, 63.68, 60.12, 59.21	67.24, 59.26, 45.95, 44.43, 38.14, 37.64
D3.event5112	14	+	105445511	105450058	D3.event5112.1,D3.event5112.3	,105449359-105449409^	,1-2^	2	ENSG00000226174	TEX22	protein_coding	UTR-3	D3.event5112.3	Known-Coding	0.00301	0	0.348831	0.499948	42.36, 34.99, 32, 28.39, 26.93	31.84, 30.98, 30.46, 29, 28.46, 28.28	71.39, 71.36, 68.99, 63.93, 54	91.46, 88.98, 88.84, 84.46, 81, 79.28
D3.event5112	14	+	105445511	105450058	D3.event5112.1,D3.event5112.3	,105449359-105449409^	,1-2^	2	ENSG00000226174	TEX22	protein_coding	UTR-3	D3.event5112.1	Known-Coding	0.00301	0	0.651169	0.500052	43, 37, 34, 29, 22	61, 58, 57, 56, 52, 51	71.39, 71.36, 68.99, 63.93, 54	91.46, 88.98, 88.84, 84.46, 81, 79.28
D2.event8246	19	+	4357585	4359163	D2.event8246.1,D2.event8246.2	,4358083-4358172^	,1-2^	2	ENSG00000008382	MPND	protein_coding	CDS	D2.event8246.1	Known-Coding	0.00301	0	0.357559	0.181685	17, 11, 9, 6, 6	27, 21, 20, 16.5, 15, 14	60.75, 56.5, 55.62, 53.47, 42.47	73.96, 53.5, 50.5, 49.14, 48.47, 43
D2.event8246	19	+	4357585	4359163	D2.event8246.1,D2.event8246.2	,4358083-4358172^	,1-2^	2	ENSG00000008382	MPND	protein_coding	CDS	D2.event8246.2	Known-Coding	0.00301	0	0.642441	0.818315	50.5, 49.75, 46.62, 36.47, 36.47	46.96, 37, 36.5, 33.47, 28.14, 23	60.75, 56.5, 55.62, 53.47, 42.47	73.96, 53.5, 50.5, 49.14, 48.47, 43
D5.event597	1	+	155308965	155312255	D5.event597.1,D5.event597.2,D5.event597.3,D5.event597.4,D5.event597.5	,155309789-155309965^155310043-155310205^,155310043-155310205^,155310064-155310205^,155310064-155310205^155310336-155310453^	,1-2^3-5^,3-5^,4-5^,4-5^6-7^	5	ENSG00000160752	FDPS	protein_coding	CDS.DOM	D5.event597.1	Known-Coding	0.00302	0.0124909	0.0109215	0.00571854	10, 10, 9, 8, 6	28.33, 24, 22.5, 22, 19, 17	1715.91, 1605.6, 1470.11, 1433.06, 1348.02	2235.15, 2132.67, 2126.91, 1939.16, 1899.22, 1861.23
D5.event597	1	+	155308965	155312255	D5.event597.1,D5.event597.2,D5.event597.3,D5.event597.4,D5.event597.5	,155309789-155309965^155310043-155310205^,155310043-155310205^,155310064-155310205^,155310064-155310205^155310336-155310453^	,1-2^3-5^,3-5^,4-5^,4-5^6-7^	5	ENSG00000160752	FDPS	protein_coding	CDS.DOM	D5.event597.4	Known-Coding	0.00302	0.0235957	0.453621	0.480918	820.98, 792.8, 706.69, 685.5, 636.43	1012.22, 974.5, 962.26, 876.45, 872.53, 833.66	1715.91, 1605.6, 1470.11, 1433.06, 1348.02	2235.15, 2132.67, 2126.91, 1939.16, 1899.22, 1861.23
D5.event597	1	+	155308965	155312255	D5.event597.1,D5.event597.2,D5.event597.3,D5.event597.4,D5.event597.5	,155309789-155309965^155310043-155310205^,155310043-155310205^,155310064-155310205^,155310064-155310205^155310336-155310453^	,1-2^3-5^,3-5^,4-5^,4-5^6-7^	5	ENSG00000160752	FDPS	protein_coding	CDS.DOM	D5.event597.3	Known-Coding	0.00302	0.698292	0.454582	0.435591	758.22, 686.06, 637.88, 636.04, 580.7	1003.92, 979.43, 978.87, 869.57, 860.94, 850.59	1715.91, 1605.6, 1470.11, 1433.06, 1348.02	2235.15, 2132.67, 2126.91, 1939.16, 1899.22, 1861.23
D5.event597	1	+	155308965	155312255	D5.event597.1,D5.event597.2,D5.event597.3,D5.event597.4,D5.event597.5	,155309789-155309965^155310043-155310205^,155310043-155310205^,155310064-155310205^,155310064-155310205^155310336-155310453^	,1-2^3-5^,3-5^,4-5^,4-5^6-7^	5	ENSG00000160752	FDPS	protein_coding	CDS.DOM	D5.event597.5	Known-NMD	0.00302	1	0.00739456	0.00631775	12.34, 11.27, 9.57, 7.42, 7	23.47, 17.57, 15.59, 14.22, 11.82, 7.67	1715.91, 1605.6, 1470.11, 1433.06, 1348.02	2235.15, 2132.67, 2126.91, 1939.16, 1899.22, 1861.23
D5.event597	1	+	155308965	155312255	D5.event597.1,D5.event597.2,D5.event597.3,D5.event597.4,D5.event597.5	,155309789-155309965^155310043-155310205^,155310043-155310205^,155310064-155310205^,155310064-155310205^155310336-155310453^	,1-2^3-5^,3-5^,4-5^,4-5^6-7^	5	ENSG00000160752	FDPS	protein_coding	CDS.DOM	D5.event597.2	Known-Coding	0.00302	1	0.0734813	0.0714542	121.29, 110.11, 108.55, 108.17, 92.68	183.19, 159.92, 146.81, 140.31, 133.16, 132.84	1715.91, 1605.6, 1470.11, 1433.06, 1348.02	2235.15, 2132.67, 2126.91, 1939.16, 1899.22, 1861.23
D2.event2036	10	+	110130486	110133326	D2.event2036.1,D2.event2036.2	,110132305-110132400^	,1-2^	2	ENSG00000148700	ADD3	protein_coding	CDS	D2.event2036.1	Known-Coding	0.00302	0	0.342574	0.464239	51, 49.5, 45.5, 45, 43.5	42, 39, 39, 31, 30.5, 28	111.6, 104.51, 98.76, 95.53, 94.79	126.97, 112.65, 100.75, 94.49, 93.71, 83.54
D2.event2036	10	+	110130486	110133326	D2.event2036.1,D2.event2036.2	,110132305-110132400^	,1-2^	2	ENSG00000148700	ADD3	protein_coding	CDS	D2.event2036.2	Known-Coding	0.00302	0	0.657426	0.535761	60.6, 55.01, 53.26, 52.03, 49.79	87.97, 72.75, 70.65, 63.99, 54.71, 52.54	111.6, 104.51, 98.76, 95.53, 94.79	126.97, 112.65, 100.75, 94.49, 93.71, 83.54
D2.event7975	18	+	36681570	36693209	D2.event7975.1,D2.event7975.2	,36687128-36687178^	,1-2^	2	ENSG00000134775	FHOD3	protein_coding	CDS.DOM	D2.event7975.1	Known-Coding	0.00332	0	0.153576	0.0584064	7, 5, 4, 4, 4	11, 9, 8, 7, 3.5, 2	106.47, 92.86, 82.5, 68.81, 64.99	55.09, 52.96, 48.5, 46, 32.5, 28.32
D2.event7975	18	+	36681570	36693209	D2.event7975.1,D2.event7975.2	,36687128-36687178^	,1-2^	2	ENSG00000134775	FHOD3	protein_coding	CDS.DOM	D2.event7975.2	Known-Coding	0.00332	0	0.846424	0.941594	102.47, 85.86, 78.5, 64.81, 59.99	44.96, 44.09, 41.5, 37, 30.5, 24.82	106.47, 92.86, 82.5, 68.81, 64.99	55.09, 52.96, 48.5, 46, 32.5, 28.32
D2.event15977	8	-	61643433	61644600	D2.event15977.1,D2.event15977.2	,61644001-61643945^	,1-2^	2	ENSG00000198363	ASPH	protein_coding	CDS.DOM	D2.event15977.1	Known-Coding	0.00332	0	0.118107	0.0657107	16, 13.5, 12.5, 11.5, 9	28.5, 26, 25.5, 23, 19.5, 13.5	208.23, 205.49, 199.93, 187.64, 153.82	225.24, 214.74, 194.51, 188.5, 168.87, 160.3
D2.event15977	8	-	61643433	61644600	D2.event15977.1,D2.event15977.2	,61644001-61643945^	,1-2^	2	ENSG00000198363	ASPH	protein_coding	CDS.DOM	D2.event15977.2	Known-Coding	0.00332	0	0.881893	0.934289	194.73, 190.93, 189.49, 176.14, 141.32	196.74, 189.24, 171.51, 169, 146.8, 142.87	208.23, 205.49, 199.93, 187.64, 153.82	225.24, 214.74, 194.51, 188.5, 168.87, 160.3
D2.event12794	4	+	122224677	122229121	D2.event12794.1,D2.event12794.2	,122226707-122226835^	,1-2^	2	ENSG00000138688	KIAA1109	protein_coding	CDS	D2.event12794.1	Known-Coding	0.00357766	0	0.26496	0.0983251	5, 2, 2, 2, 2	15, 15, 13, 11, 7, 7	28.12, 27.98, 25.87, 25.66, 25.49	51.24, 48.94, 43.37, 41.5, 39.79, 31.74
D2.event12794	4	+	122224677	122229121	D2.event12794.1,D2.event12794.2	,122226707-122226835^	,1-2^	2	ENSG00000138688	KIAA1109	protein_coding	CDS	D2.event12794.2	Known-Coding	0.00357766	0	0.73504	0.901675	26.12, 23.87, 23.66, 23.49, 22.98	38.24, 33.94, 32.79, 30.5, 28.37, 24.74	28.12, 27.98, 25.87, 25.66, 25.49	51.24, 48.94, 43.37, 41.5, 39.79, 31.74
ir.D3.event2264	15	-	74899992	74902786	D3.event2264.1,D3.event2264.2,D3.event2264.3	,74902604^74902063-,74902604^74902063-74901950^74900137-	,1^2-,1^2-3^4-	3	ENSG00000178761	FAM219B	protein_coding	UTR-3	D3.event2264.1	UTR-3	0.00357771	0.000477983	0.599915	0.704229	116.65, 111.34, 94.47, 94.11, 92.24	93.8, 93.2, 72.06, 68.69, 63.34, 62.34	165.31, 142.73, 141.75, 140.4, 132.28	149.42, 149.42, 116.35, 116.11, 115.3, 109.13
ir.D3.event2264	15	-	74899992	74902786	D3.event2264.1,D3.event2264.2,D3.event2264.3	,74902604^74902063-,74902604^74902063-74901950^74900137-	,1^2-,1^2-3^4-	3	ENSG00000178761	FAM219B	protein_coding	UTR-3	D3.event2264.2	UTR-3	0.00357771	0.0688667	0.287185	0.221831	36.66, 36.32, 33.88, 29.15, 24.25	44.47, 38.65, 35.94, 33.75, 32.74, 31.46	165.31, 142.73, 141.75, 140.4, 132.28	149.42, 149.42, 116.35, 116.11, 115.3, 109.13
ir.D3.event2264	15	-	74899992	74902786	D3.event2264.1,D3.event2264.2,D3.event2264.3	,74902604^74902063-,74902604^74902063-74901950^74900137-	,1^2-,1^2-3^4-	3	ENSG00000178761	FAM219B	protein_coding	UTR-3	D3.event2264.3	UTR-3	0.00357771	0.17162	0.112899	0.0739405	13.19, 12.41, 12, 8.66, 7.14	16.97, 16.2, 16.02, 13.04, 11.75, 11.31	165.31, 142.73, 141.75, 140.4, 132.28	149.42, 149.42, 116.35, 116.11, 115.3, 109.13
ir.D4.event6232	8	-	100713181	100718280	D4.event6232.1,D4.event6232.2,D4.event6232.3,D4.event6232.4	100718183^100717888-100717773^100715601-100715462^,100718087^100717888-100717773^100715601-100715462^,100717773^100715601-100715462^,100715471^	1^3-4^5-7^,2^3-4^5-7^,4^5-7^,6^	4	ENSG00000070756	PABPC1	protein_coding	CDS.DOM	D4.event6232.1	Known-Coding	0.00372037	0.00246543	0.151063	0.115823	98.17, 93.92, 85.86, 81.78, 68.55	106.58, 105.05, 102.03, 96.91, 90.84, 73.42	815.93, 802.22, 721.78, 704.25, 656.03	718.42, 688.74, 663.1, 593.91, 582.23, 559.67
ir.D4.event6232	8	-	100713181	100718280	D4.event6232.1,D4.event6232.2,D4.event6232.3,D4.event6232.4	100718183^100717888-100717773^100715601-100715462^,100718087^100717888-100717773^100715601-100715462^,100717773^100715601-100715462^,100715471^	1^3-4^5-7^,2^3-4^5-7^,4^5-7^,6^	4	ENSG00000070756	PABPC1	protein_coding	CDS.DOM	D4.event6232.2	Known-Coding	0.00372037	0.00249545	0.618869	0.668759	568.17, 533.28, 471.44, 455.38, 446.69	442.34, 419.83, 409.73, 369.49, 366.77, 347.54	815.93, 802.22, 721.78, 704.25, 656.03	718.42, 688.74, 663.1, 593.91, 582.23, 559.67
ir.D4.event6232	8	-	100713181	100718280	D4.event6232.1,D4.event6232.2,D4.event6232.3,D4.event6232.4	100718183^100717888-100717773^100715601-100715462^,100718087^100717888-100717773^100715601-100715462^,100717773^100715601-100715462^,100715471^	1^3-4^5-7^,2^3-4^5-7^,4^5-7^,6^	4	ENSG00000070756	PABPC1	protein_coding	CDS.DOM	D4.event6232.3	PTC_50_All	0.00372037	1	0.213245	0.19889	173.21, 165.21, 142.59, 141.58, 113.88	161.99, 156.5, 133.4, 132.03, 118.61, 109.67	815.93, 802.22, 721.78, 704.25, 656.03	718.42, 688.74, 663.1, 593.91, 582.23, 559.67
ir.D4.event6232	8	-	100713181	100718280	D4.event6232.1,D4.event6232.2,D4.event6232.3,D4.event6232.4	100718183^100717888-100717773^100715601-100715462^,100718087^100717888-100717773^100715601-100715462^,100717773^100715601-100715462^,100715471^	1^3-4^5-7^,2^3-4^5-7^,4^5-7^,6^	4	ENSG00000070756	PABPC1	protein_coding	CDS.DOM	D4.event6232.4	PTC_50_All	0.00372037	1	0.0168225	0.0165279	14, 13.95, 12.36, 10.59, 9.6	13, 11.97, 10.45, 9.81, 9.21, 8.9	815.93, 802.22, 721.78, 704.25, 656.03	718.42, 688.74, 663.1, 593.91, 582.23, 559.67
D2.event9660	2	+	182736386	182740388	D2.event9660.1,D2.event9660.2	182739545-,182740299-	1-,2-	2	ENSG00000077232	DNAJC10	protein_coding	CDS	D2.event9660.1	PTC_50_All	0.00426364	0	0.12597	0.211128	23, 23, 20, 15, 14	21, 18, 17, 14, 13, 12	104, 93, 89, 87, 77	161, 155, 127, 116, 102, 94
D2.event9660	2	+	182736386	182740388	D2.event9660.1,D2.event9660.2	182739545-,182740299-	1-,2-	2	ENSG00000077232	DNAJC10	protein_coding	CDS	D2.event9660.2	Known-Coding	0.00426364	0	0.87403	0.788872	81, 73, 70, 69, 62	140, 137, 114, 99, 90, 80	104, 93, 89, 87, 77	161, 155, 127, 116, 102, 94
ir.D3.event901	11	+	13711764	13712966	D3.event901.1,D3.event901.2,D3.event901.3	13711808^13711928-13712046^,13711808^13711928-13712055^,13712046^	1^2-3^,1^2-4^,3^	3	ENSG00000197601	FAR1	protein_coding	CDS.DOM	D3.event901.3	PTC_50_All	0.0044009	0.00124311	0.126984	0.204116	45.43, 33.91, 32.03, 30, 27.5	26.1, 20.98, 19.36, 17.23, 17.15, 15.81	183.34, 170.59, 162.28, 156.59, 154.13	174.38, 166.86, 161.39, 149.04, 136.2, 133
ir.D3.event901	11	+	13711764	13712966	D3.event901.1,D3.event901.2,D3.event901.3	13711808^13711928-13712046^,13711808^13711928-13712055^,13712046^	1^2-3^,1^2-4^,3^	3	ENSG00000197601	FAR1	protein_coding	CDS.DOM	D3.event901.2	In-Frame-Change	0.0044009	0.545087	0.169704	0.129675	27.28, 23.77, 20.69, 18.25, 17.06	38.67, 29.53, 26.04, 22.98, 20.25, 19.05	183.34, 170.59, 162.28, 156.59, 154.13	174.38, 166.86, 161.39, 149.04, 136.2, 133
ir.D3.event901	11	+	13711764	13712966	D3.event901.1,D3.event901.2,D3.event901.3	13711808^13711928-13712046^,13711808^13711928-13712055^,13712046^	1^2-3^,1^2-4^,3^	3	ENSG00000197601	FAR1	protein_coding	CDS.DOM	D3.event901.1	Known-Coding	0.0044009	1	0.703312	0.666209	119.66, 119.32, 105.62, 103.44, 102.97	122.98, 119.9, 111.23, 105.77, 94.97, 92.87	183.34, 170.59, 162.28, 156.59, 154.13	174.38, 166.86, 161.39, 149.04, 136.2, 133
D3.event14990	7	+	99452440	99454136	D3.event14990.1,D3.event14990.2,D3.event14990.3	99453966-,99454041-,99454044-	1-,2-,3-	3	ENSG00000160917	CPSF4	protein_coding	CDS.DOM	D3.event14990.1	Known-Coding	0.00459341	0.000721842	0.473803	0.592512	105, 101, 90, 76, 74	97, 91, 82.5, 81, 79, 72	173, 151, 150, 144, 135	188.5, 187.5, 187, 180, 168, 149
D3.event14990	7	+	99452440	99454136	D3.event14990.1,D3.event14990.2,D3.event14990.3	99453966-,99454041-,99454044-	1-,2-,3-	3	ENSG00000160917	CPSF4	protein_coding	CDS.DOM	D3.event14990.2	Known-Coding	0.00459341	0.0490799	0.425712	0.342685	61, 55, 54, 54, 34	87, 81, 79, 73.5, 68, 63	173, 151, 150, 144, 135	188.5, 187.5, 187, 180, 168, 149
D3.event14990	7	+	99452440	99454136	D3.event14990.1,D3.event14990.2,D3.event14990.3	99453966-,99454041-,99454044-	1-,2-,3-	3	ENSG00000160917	CPSF4	protein_coding	CDS.DOM	D3.event14990.3	Known-Coding	0.00459341	0.36967	0.100485	0.0648031	16, 13, 9, 6, 5	23.5, 21, 18, 17.5, 14, 12	173, 151, 150, 144, 135	188.5, 187.5, 187, 180, 168, 149
D4.event2357	10	-	114300194	114301354	D4.event2357.1,D4.event2357.2,D4.event2357.3,D4.event2357.4	114300690-114300445^114300362-,114300690-114300445^114300359-,114300362-,114300359-	1-2^3-,1-2^4-,3-,4-	4	ENSG00000169129	AFAP1L2	protein_coding	CDS	D4.event2357.3	Known-Coding	0.00483199	0.0204611	0.00982034	0.0244576	13, 12, 10, 10, 8	5, 3, 3, 2, 1, 1	474.2, 457.54, 428.46, 413.43, 393.39	297.76, 272.11, 258.91, 245.06, 227.7, 225.93
D4.event2357	10	-	114300194	114301354	D4.event2357.1,D4.event2357.2,D4.event2357.3,D4.event2357.4	114300690-114300445^114300362-,114300690-114300445^114300359-,114300362-,114300359-	1-2^3-,1-2^4-,3-,4-	4	ENSG00000169129	AFAP1L2	protein_coding	CDS	D4.event2357.4	Known-Coding	0.00483199	0.285265	0.0379712	0.0562985	28, 27, 26, 22, 19	12, 10, 10, 10, 9, 7	474.2, 457.54, 428.46, 413.43, 393.39	297.76, 272.11, 258.91, 245.06, 227.7, 225.93
D4.event2357	10	-	114300194	114301354	D4.event2357.1,D4.event2357.2,D4.event2357.3,D4.event2357.4	114300690-114300445^114300362-,114300690-114300445^114300359-,114300362-,114300359-	1-2^3-,1-2^4-,3-,4-	4	ENSG00000169129	AFAP1L2	protein_coding	CDS	D4.event2357.2	Known-Coding	0.00483199	1	0.320681	0.292272	146.36, 141.77, 127.16, 113.07, 105	102.4, 86.08, 84.22, 76.34, 73.34, 67.45	474.2, 457.54, 428.46, 413.43, 393.39	297.76, 272.11, 258.91, 245.06, 227.7, 225.93
D4.event2357	10	-	114300194	114301354	D4.event2357.1,D4.event2357.2,D4.event2357.3,D4.event2357.4	114300690-114300445^114300362-,114300690-114300445^114300359-,114300362-,114300359-	1-2^3-,1-2^4-,3-,4-	4	ENSG00000169129	AFAP1L2	protein_coding	CDS	D4.event2357.1	Known-Coding	0.00483199	1	0.631528	0.626972	286.84, 281.77, 274.3, 263.36, 252.39	180.36, 171.03, 162.69, 158.72, 150.25, 141.59	474.2, 457.54, 428.46, 413.43, 393.39	297.76, 272.11, 258.91, 245.06, 227.7, 225.93
D2.event4947	14	+	64214470	64216248	D2.event4947.1,D2.event4947.2	,64215286-64215354^	,1-2^	2	ENSG00000054654	SYNE2	protein_coding	CDS.DOM	D2.event4947.2	Known-Coding	0.00484187	0	0.499758	0.310722	16.25, 15.72, 14.83, 9.49, 9.17	26.32, 21.79, 20.2, 20.07, 18.44, 18.03	57.25, 42.49, 39.17, 36.72, 35.83	47.32, 44.79, 44.2, 42.07, 38.44, 33.03
D2.event4947	14	+	64214470	64216248	D2.event4947.1,D2.event4947.2	,64215286-64215354^	,1-2^	2	ENSG00000054654	SYNE2	protein_coding	CDS.DOM	D2.event4947.1	Known-Coding	0.00484187	0	0.500242	0.689278	41, 33, 30, 21, 21	24, 23, 22, 21, 20, 15	57.25, 42.49, 39.17, 36.72, 35.83	47.32, 44.79, 44.2, 42.07, 38.44, 33.03
ir.D5.event5815	6	-	111696456	111703034	D5.event5815.1,D5.event5815.2,D5.event5815.3,D5.event5815.4,D5.event5815.5	111702885^111700268-111700104^,111702885^111700268-111700104^111699670-111699515^,111702885^111700268-111699515^,111702885^111699670-111699515^,111700104^	1^2-3^,1^2-3^4-5^,1^2-5^,1^4-5^,3^	5	ENSG00000010810	FYN	protein_coding	CDS.DOM	D5.event5815.1	Known-Coding	0.00508694	0.0607754	0.618814	0.566658	224.21, 212.74, 212.16, 201.17, 181.74	253.98, 247.3, 245.43, 218.05, 202.21, 197.77	395.15, 375.33, 359.43, 353.97, 337.17	400.25, 388.4, 383.93, 367.46, 340.45, 324.38
ir.D5.event5815	6	-	111696456	111703034	D5.event5815.1,D5.event5815.2,D5.event5815.3,D5.event5815.4,D5.event5815.5	111702885^111700268-111700104^,111702885^111700268-111700104^111699670-111699515^,111702885^111700268-111699515^,111702885^111699670-111699515^,111700104^	1^2-3^,1^2-3^4-5^,1^2-5^,1^4-5^,3^	5	ENSG00000010810	FYN	protein_coding	CDS.DOM	D5.event5815.4	Known-Coding	0.00508694	0.0875728	0.0657548	0.0934553	46.43, 34.21, 30.7, 29.73, 29.16	30.58, 26.15, 24.78, 24.08, 19.67, 19.62	395.15, 375.33, 359.43, 353.97, 337.17	400.25, 388.4, 383.93, 367.46, 340.45, 324.38
ir.D5.event5815	6	-	111696456	111703034	D5.event5815.1,D5.event5815.2,D5.event5815.3,D5.event5815.4,D5.event5815.5	111702885^111700268-111700104^,111702885^111700268-111700104^111699670-111699515^,111702885^111700268-111699515^,111702885^111699670-111699515^,111700104^	1^2-3^,1^2-3^4-5^,1^2-5^,1^4-5^,3^	5	ENSG00000010810	FYN	protein_coding	CDS.DOM	D5.event5815.3	PTC_50_All	0.00508694	0.760814	0.0945465	0.119079	50.67, 47.06, 45.47, 37.2, 36.41	38.42, 36.65, 36.14, 34.73, 31.41, 30.93	395.15, 375.33, 359.43, 353.97, 337.17	400.25, 388.4, 383.93, 367.46, 340.45, 324.38
ir.D5.event5815	6	-	111696456	111703034	D5.event5815.1,D5.event5815.2,D5.event5815.3,D5.event5815.4,D5.event5815.5	111702885^111700268-111700104^,111702885^111700268-111700104^111699670-111699515^,111702885^111700268-111699515^,111702885^111699670-111699515^,111700104^	1^2-3^,1^2-3^4-5^,1^2-5^,1^4-5^,3^	5	ENSG00000010810	FYN	protein_coding	CDS.DOM	D5.event5815.2	In-Frame-Change	0.00508694	1	0.094293	0.0793851	35.92, 32.59, 31.93, 23.61, 20.55	41.27, 39.96, 36.17, 36.14, 29.56, 24.79	395.15, 375.33, 359.43, 353.97, 337.17	400.25, 388.4, 383.93, 367.46, 340.45, 324.38
ir.D5.event5815	6	-	111696456	111703034	D5.event5815.1,D5.event5815.2,D5.event5815.3,D5.event5815.4,D5.event5815.5	111702885^111700268-111700104^,111702885^111700268-111700104^111699670-111699515^,111702885^111700268-111699515^,111702885^111699670-111699515^,111700104^	1^2-3^,1^2-3^4-5^,1^2-5^,1^4-5^,3^	5	ENSG00000010810	FYN	protein_coding	CDS.DOM	D5.event5815.5	PTC_50_All	0.00508694	1	0.126592	0.141422	54.44, 53.29, 52.63, 49.39, 47.64	55.23, 54.95, 45.34, 42.14, 40.86, 40.56	395.15, 375.33, 359.43, 353.97, 337.17	400.25, 388.4, 383.93, 367.46, 340.45, 324.38
D2.event11976	3	+	186784696	186785883	D2.event11976.1,D2.event11976.2	,186784962-186785101^	,1-2^	2	ENSG00000156976	EIF4A2	protein_coding	CDS.DOM	D2.event11976.1	Known-Coding	0.00552669	0	0.316126	0.374664	167, 165, 162, 160, 131	184, 179, 158, 156, 146, 122	448.75, 446.91, 411.69, 411.11, 376.85	592.2, 566, 478.37, 465.99, 450.95, 436.46
D2.event11976	3	+	186784696	186785883	D2.event11976.1,D2.event11976.2	,186784962-186785101^	,1-2^	2	ENSG00000156976	EIF4A2	protein_coding	CDS.DOM	D2.event11976.2	Known-Coding	0.00552669	0	0.683874	0.625336	286.75, 279.91, 251.11, 246.69, 245.85	413.2, 382, 320.37, 319.99, 314.46, 294.95	448.75, 446.91, 411.69, 411.11, 376.85	592.2, 566, 478.37, 465.99, 450.95, 436.46
D2.event13553	5	+	160009113	160010500	D2.event13553.1,D2.event13553.2	160009190^,160009193^	1^,2^	2	ENSG00000113312	TTC1	protein_coding	UTR-5	D2.event13553.1	UTR-5	0.00552669	0	0.179457	0.0730587	6, 5, 4, 3, 3	13, 11, 10, 7, 6, 5	65, 62, 61, 53, 49	65, 52, 50, 44, 41, 38
D2.event13553	5	+	160009113	160010500	D2.event13553.1,D2.event13553.2	160009190^,160009193^	1^,2^	2	ENSG00000113312	TTC1	protein_coding	UTR-5	D2.event13553.2	UTR-5	0.00552669	0	0.820543	0.926941	60, 58, 56, 50, 45	54, 42, 38, 37, 36, 31	65, 62, 61, 53, 49	65, 52, 50, 44, 41, 38
D5.event7753	17	-	59112345	59155131	D5.event7753.1,D5.event7753.2,D5.event7753.3,D5.event7753.4,D5.event7753.5	,59131367-59131281^,59131367-59131281^59119495-59119319^,59131367-59131281^59119495-59119299^,59119495-59119319^	,1-2^,1-2^3-4^,1-2^3-5^,3-4^	5	ENSG00000182628	SKA2	protein_coding	CDS.DOM	D5.event7753.5	Known-Coding	0.00609031	0.0110771	0.131136	0.0961159	54.95, 52.63, 51.26, 47.25, 37.58	90.86, 80.87, 75.44, 73.72, 71.49, 55.23	560.96, 512.77, 502.22, 499.51, 463	647.46, 589.51, 574.45, 570.11, 559.16, 472.5
D5.event7753	17	-	59112345	59155131	D5.event7753.1,D5.event7753.2,D5.event7753.3,D5.event7753.4,D5.event7753.5	,59131367-59131281^,59131367-59131281^59119495-59119319^,59131367-59131281^59119495-59119299^,59119495-59119319^	,1-2^,1-2^3-4^,1-2^3-5^,3-4^	5	ENSG00000182628	SKA2	protein_coding	CDS.DOM	D5.event7753.3	Known-Coding	0.00609031	0.249465	0.397362	0.438657	249.45, 223.45, 223.08, 209.51, 207.83	253.21, 239.7, 234.15, 223.31, 220.99, 185	560.96, 512.77, 502.22, 499.51, 463	647.46, 589.51, 574.45, 570.11, 559.16, 472.5
D5.event7753	17	-	59112345	59155131	D5.event7753.1,D5.event7753.2,D5.event7753.3,D5.event7753.4,D5.event7753.5	,59131367-59131281^,59131367-59131281^59119495-59119319^,59131367-59131281^59119495-59119299^,59119495-59119319^	,1-2^,1-2^3-4^,1-2^3-5^,3-4^	5	ENSG00000182628	SKA2	protein_coding	CDS.DOM	D5.event7753.1	Known-Coding	0.00609031	1	0.0494721	0.0371358	23, 22, 20, 17, 12	39, 33, 30, 26, 22, 19	560.96, 512.77, 502.22, 499.51, 463	647.46, 589.51, 574.45, 570.11, 559.16, 472.5
D5.event7753	17	-	59112345	59155131	D5.event7753.1,D5.event7753.2,D5.event7753.3,D5.event7753.4,D5.event7753.5	,59131367-59131281^,59131367-59131281^59119495-59119319^,59131367-59131281^59119495-59119299^,59119495-59119319^	,1-2^,1-2^3-4^,1-2^3-5^,3-4^	5	ENSG00000182628	SKA2	protein_coding	CDS.DOM	D5.event7753.2	Known-Coding	0.00609031	1	0.307707	0.323	180.63, 178.83, 158.38, 151.72, 150.21	198.11, 190.51, 178.66, 173.01, 164.92, 145	560.96, 512.77, 502.22, 499.51, 463	647.46, 589.51, 574.45, 570.11, 559.16, 472.5
D5.event7753	17	-	59112345	59155131	D5.event7753.1,D5.event7753.2,D5.event7753.3,D5.event7753.4,D5.event7753.5	,59131367-59131281^,59131367-59131281^59119495-59119319^,59131367-59131281^59119495-59119299^,59119495-59119319^	,1-2^,1-2^3-4^,1-2^3-5^,3-4^	5	ENSG00000182628	SKA2	protein_coding	CDS.DOM	D5.event7753.4	Known-Coding	0.00609031	1	0.114323	0.105092	66.52, 62.43, 57.5, 49.11, 32.14	74.07, 72.28, 71.78, 64.58, 58.29, 49.01	560.96, 512.77, 502.22, 499.51, 463	647.46, 589.51, 574.45, 570.11, 559.16, 472.5
ir.D2.event3962	2	-	85558440	85559075	D2.event3962.1,D2.event3962.2	,85558917^85558605-	,1^2-	2	ENSG00000115486	GGCX	protein_coding	CDS.DOM	D2.event3962.1	PTC_50_All	0.00625364	0	0.0845656	0.208397	9, 8, 7, 4, 3	7, 6, 6, 6, 5, 3	43, 41, 23, 21, 21	70, 69, 68, 65, 61, 59
ir.D2.event3962	2	-	85558440	85559075	D2.event3962.1,D2.event3962.2	,85558917^85558605-	,1^2-	2	ENSG00000115486	GGCX	protein_coding	CDS.DOM	D2.event3962.2	Known-Coding	0.00625364	0	0.915434	0.791603	36, 32, 18, 17, 15	66, 64, 63, 59, 55, 52	43, 41, 23, 21, 21	70, 69, 68, 65, 61, 59
D3.event11129	22	+	20394662	20400632	D3.event11129.1,D3.event11129.2	,20395333-20395418^	,1-2^	2	ENSG00000185252	ZNF74	protein_coding	CDS	D3.event11129.1	Known-Coding	0.00628102	0	0.400941	0.2418	21, 17, 16, 14, 10	22, 17, 15.33, 14.33, 12.67, 11.5	73.31, 69.24, 62.31, 61.38, 56.47	47.5, 42.05, 39.8, 38.7, 34.89, 28.65
D3.event11129	22	+	20394662	20400632	D3.event11129.1,D3.event11129.2	,20395333-20395418^	,1-2^	2	ENSG00000185252	ZNF74	protein_coding	CDS	D3.event11129.2	Known-Coding	0.00628102	0	0.599059	0.7582	52.31, 52.24, 51.38, 46.31, 42.47	27.13, 26.72, 25.5, 24.37, 17.89, 17.15	73.31, 69.24, 62.31, 61.38, 56.47	47.5, 42.05, 39.8, 38.7, 34.89, 28.65
D2.event7049	17	+	32365487	32367772	D2.event7049.1,D2.event7049.2	,32366665-32366757^	,1-2^	2	ENSG00000010244	ZNF207	protein_coding	CDS	D2.event7049.1	Known-Coding	0.00628437	0	0.546984	0.607779	542.5, 487.5, 469, 455, 453	391.5, 341.5, 311, 305, 303, 292.5	914.69, 785.5, 782.77, 748.71, 730.19	650.86, 615.2, 606.62, 579.41, 557.67, 544.07
D2.event7049	17	+	32365487	32367772	D2.event7049.1,D2.event7049.2	,32366665-32366757^	,1-2^	2	ENSG00000010244	ZNF207	protein_coding	CDS	D2.event7049.2	Known-Coding	0.00628437	0	0.453016	0.392221	372.19, 313.77, 298, 293.71, 277.19	304.2, 301.62, 259.36, 254.67, 251.57, 237.91	914.69, 785.5, 782.77, 748.71, 730.19	650.86, 615.2, 606.62, 579.41, 557.67, 544.07
ir.D3.event2967	17	-	37519071	37520648	D3.event2967.1,D3.event2967.2,D3.event2967.3	37520538^,37520538^37520214-37520179^,37520179^	1^,1^2-3^,3^	3	ENSG00000006114	SYNRG	protein_coding	CDS	D3.event2967.1	Known-Coding	0.00635635	0.00139968	0.410506	0.256159	21, 14, 13, 12, 8	27, 24, 23, 20, 19, 15	61.04, 60.12, 51.57, 47.28, 45.45	66.99, 51.05, 49.55, 48.97, 47.98, 47.27
ir.D3.event2967	17	-	37519071	37520648	D3.event2967.1,D3.event2967.2,D3.event2967.3	37520538^,37520538^37520214-37520179^,37520179^	1^,1^2-3^,3^	3	ENSG00000006114	SYNRG	protein_coding	CDS	D3.event2967.3	PTC_50_All	0.00635635	0.321852	0.124787	0.195811	11.62, 11.18, 10.25, 10.1, 8.83	9.49, 7.07, 6.78, 5.48, 5.29, 4.8	61.04, 60.12, 51.57, 47.28, 45.45	66.99, 51.05, 49.55, 48.97, 47.98, 47.27
ir.D3.event2967	17	-	37519071	37520648	D3.event2967.1,D3.event2967.2,D3.event2967.3	37520538^,37520538^37520214-37520179^,37520179^	1^,1^2-3^,3^	3	ENSG00000006114	SYNRG	protein_coding	CDS	D3.event2967.2	Known-Coding	0.00635635	0.74886	0.464706	0.54803	38.79, 27.5, 27.39, 27.35, 24.45	30.5, 26.98, 24.49, 23.98, 19.77, 19.18	61.04, 60.12, 51.57, 47.28, 45.45	66.99, 51.05, 49.55, 48.97, 47.98, 47.27
ir.D5.event4705	3	+	180968051	180976122	D5.event4705.1,D5.event4705.2,D5.event4705.3,D5.event4705.4,D5.event4705.5	180968254^180970158-180970358^,180968254^180970158-180970358^180971075-180971155^180975313-180975404^,180968254^180970158-180970358^180975313-180975404^,180968254^180970158-180971155^180975313-180975404^,180970358^	1^2-3^,1^2-3^4-5^6-7^,1^2-3^6-7^,1^2-5^6-7^,3^	5	ENSG00000114416	FXR1	protein_coding	CDS.DOM	D5.event4705.2	Known-Coding	0.00635635	0.035981	0.107468	0.0807883	47.15, 44.55, 42.98, 34.13, 31.76	63.17, 61.05, 54.72, 52.74, 49.29, 46.5	567.29, 499.14, 491.55, 482.46, 442.22	555.49, 538.7, 512.04, 482.93, 480.52, 477.47
ir.D5.event4705	3	+	180968051	180976122	D5.event4705.1,D5.event4705.2,D5.event4705.3,D5.event4705.4,D5.event4705.5	180968254^180970158-180970358^,180968254^180970158-180970358^180971075-180971155^180975313-180975404^,180968254^180970158-180970358^180975313-180975404^,180968254^180970158-180971155^180975313-180975404^,180970358^	1^2-3^,1^2-3^4-5^6-7^,1^2-3^6-7^,1^2-5^6-7^,3^	5	ENSG00000114416	FXR1	protein_coding	CDS.DOM	D5.event4705.1	Known-Coding	0.00635635	0.150674	0.406938	0.446516	260.9, 230.27, 211.24, 209.74, 196.4	234.57, 217.16, 199.75, 197.72, 197.43, 193.37	567.29, 499.14, 491.55, 482.46, 442.22	555.49, 538.7, 512.04, 482.93, 480.52, 477.47
ir.D5.event4705	3	+	180968051	180976122	D5.event4705.1,D5.event4705.2,D5.event4705.3,D5.event4705.4,D5.event4705.5	180968254^180970158-180970358^,180968254^180970158-180970358^180971075-180971155^180975313-180975404^,180968254^180970158-180970358^180975313-180975404^,180968254^180970158-180971155^180975313-180975404^,180970358^	1^2-3^,1^2-3^4-5^6-7^,1^2-3^6-7^,1^2-5^6-7^,3^	5	ENSG00000114416	FXR1	protein_coding	CDS.DOM	D5.event4705.4	PTC_50_All	0.00635635	0.853995	0.112272	0.0927559	51.11, 49.49, 46.84, 43.13, 39.71	65.65, 60.31, 57.21, 54.02, 53.46, 51.46	567.29, 499.14, 491.55, 482.46, 442.22	555.49, 538.7, 512.04, 482.93, 480.52, 477.47
ir.D5.event4705	3	+	180968051	180976122	D5.event4705.1,D5.event4705.2,D5.event4705.3,D5.event4705.4,D5.event4705.5	180968254^180970158-180970358^,180968254^180970158-180970358^180971075-180971155^180975313-180975404^,180968254^180970158-180970358^180975313-180975404^,180968254^180970158-180971155^180975313-180975404^,180970358^	1^2-3^,1^2-3^4-5^6-7^,1^2-3^6-7^,1^2-5^6-7^,3^	5	ENSG00000114416	FXR1	protein_coding	CDS.DOM	D5.event4705.5	PTC_50_All	0.00635635	1	0.0741516	0.0828672	46.73, 43.87, 41.74, 37.47, 35.92	46.58, 37.96, 37.31, 35.41, 34.93, 33.76	567.29, 499.14, 491.55, 482.46, 442.22	555.49, 538.7, 512.04, 482.93, 480.52, 477.47
ir.D5.event4705	3	+	180968051	180976122	D5.event4705.1,D5.event4705.2,D5.event4705.3,D5.event4705.4,D5.event4705.5	180968254^180970158-180970358^,180968254^180970158-180970358^180971075-180971155^180975313-180975404^,180968254^180970158-180970358^180975313-180975404^,180968254^180970158-180971155^180975313-180975404^,180970358^	1^2-3^,1^2-3^4-5^6-7^,1^2-3^6-7^,1^2-5^6-7^,3^	5	ENSG00000114416	FXR1	protein_coding	CDS.DOM	D5.event4705.3	Known-Coding	0.00635635	1	0.299171	0.297072	168.27, 157.84, 141.93, 136.06, 133.43	164.39, 158.32, 154.76, 153.78, 146.67, 133.7	567.29, 499.14, 491.55, 482.46, 442.22	555.49, 538.7, 512.04, 482.93, 480.52, 477.47
D3.event16911	X	+	71283721	71290629	D3.event16911.1,D3.event16911.2,D3.event16911.3	,71284397-71284453^,71284397-71284453^71284984-71285097^	,1-2^,1-2^3-4^	3	ENSG00000147140	NONO	protein_coding	UTR-5	D3.event16911.1	UTR-5	0.00639868	0.000765049	0.188443	0.228345	235, 233, 214, 206, 203	205, 181, 167, 166, 156.5, 152.5	1034.62, 993.34, 939.45, 933.15, 880.88	1003.45, 983.83, 895.49, 871.5, 856.2, 844.85
D3.event16911	X	+	71283721	71290629	D3.event16911.1,D3.event16911.2,D3.event16911.3	,71284397-71284453^,71284397-71284453^71284984-71285097^	,1-2^,1-2^3-4^	3	ENSG00000147140	NONO	protein_coding	UTR-5	D3.event16911.2	UTR-5	0.00639868	0.0525791	0.725461	0.693533	726.74, 692.32, 662.74, 635.68, 599.13	748.62, 701.48, 660.34, 619.21, 617.83, 611.35	1034.62, 993.34, 939.45, 933.15, 880.88	1003.45, 983.83, 895.49, 871.5, 856.2, 844.85
D3.event16911	X	+	71283721	71290629	D3.event16911.1,D3.event16911.2,D3.event16911.3	,71284397-71284453^,71284397-71284453^71284984-71285097^	,1-2^,1-2^3-4^	3	ENSG00000147140	NONO	protein_coding	UTR-5	D3.event16911.3	UTR-5	0.00639868	1	0.086096	0.0781215	98.02, 74.88, 70.71, 67.75, 62.47	87.83, 82.65, 77.35, 77, 72.67, 70.99	1034.62, 993.34, 939.45, 933.15, 880.88	1003.45, 983.83, 895.49, 871.5, 856.2, 844.85
ir.D2.event436	1	-	42754869	42755217	D2.event436.1,D2.event436.2	,42755165^42754990-	,1^2-	2	ENSG00000117385	LEPRE1	protein_coding	CDS	D2.event436.1	PTC_50_All	0.00672946	0	0.0664753	0.125228	23, 13, 13, 10, 8	15, 15, 14, 13, 12, 9	122, 114, 107, 96.5, 94	232, 227, 211, 184, 164.5, 162
ir.D2.event436	1	-	42754869	42755217	D2.event436.1,D2.event436.2	,42755165^42754990-	,1^2-	2	ENSG00000117385	LEPRE1	protein_coding	CDS	D2.event436.2	Known-Coding	0.00672946	0	0.933525	0.874772	104, 99, 94, 86, 83.5	217, 214, 196, 170, 153, 152.5	122, 114, 107, 96.5, 94	232, 227, 211, 184, 164.5, 162
D2.event11126	22	+	20126368	20127181	D2.event11126.1,D2.event11126.2	20126952-,20126955-	1-,2-	2	ENSG00000099901	RANBP1	protein_coding	CDS	D2.event11126.1	Known-Coding	0.00679201	0	0.605283	0.641988	856.5, 728.5, 713.5, 694, 678	913.5, 899, 778.5, 735.5, 726.5, 710.5	1326.5, 1111.5, 1105, 1100.5, 1073	1523.5, 1444, 1303.5, 1242.5, 1179.5, 1176.5
D2.event11126	22	+	20126368	20127181	D2.event11126.1,D2.event11126.2	20126952-,20126955-	1-,2-	2	ENSG00000099901	RANBP1	protein_coding	CDS	D2.event11126.2	Known-Coding	0.00679201	0	0.394717	0.358012	470, 406.5, 395, 391.5, 383	610, 545, 525, 516, 466, 444	1326.5, 1111.5, 1105, 1100.5, 1073	1523.5, 1444, 1303.5, 1242.5, 1179.5, 1176.5
D4.event38	1	+	7962875	7970894	D4.event38.1,D4.event38.3,D4.event38.4	7965324-7965425^,7965324-7965425^7969345-7969404^,7969345-7969404^	1-2^,1-2^3-4^,3-4^	3	ENSG00000116288	PARK7	protein_coding	CDS	D4.event38.1	Known-Coding	0.0068389	0.00106763	0.0682651	0.0416623	39.13, 38.24, 33.76, 31.27, 24.76	75.86, 66.25, 63.55, 49.32, 47.75, 46.17	944.76, 848.06, 796.44, 732.53, 728.15	913.11, 891.56, 879.51, 876.36, 807.24, 746.32
D4.event38	1	+	7962875	7970894	D4.event38.1,D4.event38.3,D4.event38.4	7965324-7965425^,7965324-7965425^7969345-7969404^,7969345-7969404^	1-2^,1-2^3-4^,3-4^	3	ENSG00000116288	PARK7	protein_coding	CDS	D4.event38.3	Known-Coding	0.0068389	0.294539	0.889222	0.909064	870.51, 771.23, 713.08, 676.93, 653.16	823.32, 791.33, 788.85, 760.37, 728.62, 653.87	944.76, 848.06, 796.44, 732.53, 728.15	913.11, 891.56, 879.51, 876.36, 807.24, 746.32
D4.event38	1	+	7962875	7970894	D4.event38.1,D4.event38.3,D4.event38.4	7965324-7965425^,7965324-7965425^7969345-7969404^,7969345-7969404^	1-2^,1-2^3-4^,3-4^	3	ENSG00000116288	PARK7	protein_coding	CDS	D4.event38.4	Known-Coding	0.0068389	1	0.0425126	0.0492736	45.56, 44.23, 41.23, 36.01, 30.84	52.89, 44.7, 40.47, 32.45, 24.37, 23.96	944.76, 848.06, 796.44, 732.53, 728.15	913.11, 891.56, 879.51, 876.36, 807.24, 746.32
D3.event1266	1	-	63441103	63453918	D3.event1266.1,D3.event1266.2,D3.event1266.3	,63447614-63447565^63446856-63446806^,63446856-63446806^	,1-2^3-4^,3-4^	3	ENSG00000142856	ITGB3BP	protein_coding	CDS	D3.event1266.3	Known-Coding	0.00691009	0	0.581585	0.499799	86.72, 86.14, 85.46, 81.72, 69.57	136.96, 134.63, 134.61, 114.65, 105.64, 99.98	174.38, 170.05, 166.05, 161.85, 151.22	248.57, 235.06, 232.94, 197.15, 180.5, 170.9
D3.event1266	1	-	63441103	63453918	D3.event1266.1,D3.event1266.2,D3.event1266.3	,63447614-63447565^63446856-63446806^,63446856-63446806^	,1-2^3-4^,3-4^	3	ENSG00000142856	ITGB3BP	protein_coding	CDS	D3.event1266.2	Known-NMD	0.00691009	0	0.418415	0.500201	88.92, 84.33, 81.65, 81.33, 73.71	108.61, 96.31, 93.45, 80.5, 74.86, 68.92	174.38, 170.05, 166.05, 161.85, 151.22	248.57, 235.06, 232.94, 197.15, 180.5, 170.9
D2.event7536	17	-	29082438	29086438	D2.event7536.1,D2.event7536.2	,29085648-29085604^	,1-2^	2	ENSG00000196535	MYO18A	protein_coding	CDS	D2.event7536.1	Known-Coding	0.00694746	0	0.225534	0.0923339	5, 4, 3, 3, 2	15, 10, 9, 8, 8, 8	42.97, 41.78, 36.53, 35.2, 29.11	49.38, 46.08, 43.07, 40.62, 39.84, 38.4
D2.event7536	17	-	29082438	29086438	D2.event7536.1,D2.event7536.2	,29085648-29085604^	,1-2^	2	ENSG00000196535	MYO18A	protein_coding	CDS	D2.event7536.2	Known-Coding	0.00694746	0	0.774466	0.907666	39.97, 38.78, 32.53, 30.2, 27.11	39.38, 35.07, 31.84, 31.62, 31.08, 30.4	42.97, 41.78, 36.53, 35.2, 29.11	49.38, 46.08, 43.07, 40.62, 39.84, 38.4
ir.D2.event3351	19	+	48960810	48961798	D2.event3351.1,D2.event3351.2	,48960914^48961532-	,1^2-	2	ENSG00000087088	BAX	protein_coding	CDS.DOM	D2.event3351.1	Known-Coding	0.00708018	0	0.197231	0.254178	97, 95.5, 78, 75, 74	50, 48, 48, 43.5, 43, 39	382.5, 352, 321, 299, 296	269, 238.5, 232, 231, 221, 185.5
ir.D2.event3351	19	+	48960810	48961798	D2.event3351.1,D2.event3351.2	,48960914^48961532-	,1^2-	2	ENSG00000087088	BAX	protein_coding	CDS.DOM	D2.event3351.2	Known-Coding	0.00708018	0	0.802769	0.745822	287, 255, 243, 225, 221	221, 195, 183, 182, 178, 146.5	382.5, 352, 321, 299, 296	269, 238.5, 232, 231, 221, 185.5
D2.event15984	8	-	66922392	66925437	D2.event15984.1,D2.event15984.2	,66922725-66922614^	,1-2^	2	ENSG00000245910	SNHG6	processed_transcript	Non-Coding	D2.event15984.1	Non-Coding	0.00710334	0	0.139114	0.100219	62.5, 57.5, 50, 49, 31	78, 76.5, 74.5, 72, 58, 53	587.67, 527.15, 470.36, 457.9, 447.39	548.06, 530.7, 498.61, 498.17, 444.28, 443.13
D2.event15984	8	-	66922392	66925437	D2.event15984.1,D2.event15984.2	,66922725-66922614^	,1-2^	2	ENSG00000245910	SNHG6	processed_transcript	Non-Coding	D2.event15984.2	Non-Coding	0.00710334	0	0.860886	0.899781	530.17, 464.65, 426.9, 421.36, 397.39	473.56, 454.2, 426.61, 420.17, 390.13, 386.28	587.67, 527.15, 470.36, 457.9, 447.39	548.06, 530.7, 498.61, 498.17, 444.28, 443.13
ir.D4.event5913	7	+	99452368	99454136	D4.event5913.1,D4.event5913.2,D4.event5913.3,D4.event5913.4	,99452440^99453966-,99452440^99454041-,99452440^99454044-	,1^2-,1^3-,1^4-	4	ENSG00000160917	CPSF4	protein_coding	CDS.DOM	D4.event5913.2	Known-Coding	0.0071072	0.000771646	0.428962	0.544624	105, 101, 90, 76, 74	97, 91, 82.5, 81, 79, 72	193, 161, 159, 156, 150	212.5, 209.5, 206, 192, 190, 161
ir.D4.event5913	7	+	99452368	99454136	D4.event5913.1,D4.event5913.2,D4.event5913.3,D4.event5913.4	,99452440^99453966-,99452440^99454041-,99452440^99454044-	,1^2-,1^3-,1^4-	4	ENSG00000160917	CPSF4	protein_coding	CDS.DOM	D4.event5913.3	Known-Coding	0.0071072	0.214958	0.385416	0.314978	61, 55, 54, 54, 34	87, 81, 79, 73.5, 68, 63	193, 161, 159, 156, 150	212.5, 209.5, 206, 192, 190, 161
ir.D4.event5913	7	+	99452368	99454136	D4.event5913.1,D4.event5913.2,D4.event5913.3,D4.event5913.4	,99452440^99453966-,99452440^99454041-,99452440^99454044-	,1^2-,1^3-,1^4-	4	ENSG00000160917	CPSF4	protein_coding	CDS.DOM	D4.event5913.4	Known-Coding	0.0071072	0.930079	0.0908842	0.0595404	16, 13, 9, 6, 5	23.5, 21, 18, 17.5, 14, 12	193, 161, 159, 156, 150	212.5, 209.5, 206, 192, 190, 161
ir.D4.event5913	7	+	99452368	99454136	D4.event5913.1,D4.event5913.2,D4.event5913.3,D4.event5913.4	,99452440^99453966-,99452440^99454041-,99452440^99454044-	,1^2-,1^3-,1^4-	4	ENSG00000160917	CPSF4	protein_coding	CDS.DOM	D4.event5913.1	PTC_50_All	0.0071072	1	0.0947379	0.0808575	20, 15, 12, 10, 9	25, 22, 21, 19, 12, 12	193, 161, 159, 156, 150	212.5, 209.5, 206, 192, 190, 161
ir.D3.event1203	11	-	62852811	62853590	D3.event1203.1,D3.event1203.2,D3.event1203.3	,62853552^62853115-62853075^62852839-,62853075^62852839-	,1^2-3^4-,3^4-	3	ENSG00000255717	SNHG1	processed_transcript	Non-Coding	D3.event1203.2	Non-Coding	0.00715449	0.00548489	0.525922	0.568052	422.7, 395.73, 395.5, 335.62, 316.23	385.56, 370.79, 361.92, 329.49, 321.18, 315.9	755.86, 694.47, 683.79, 593.4, 557	726.07, 720.03, 683.62, 627.28, 616.39, 590.77
ir.D3.event1203	11	-	62852811	62853590	D3.event1203.1,D3.event1203.2,D3.event1203.3	,62853552^62853115-62853075^62852839-,62853075^62852839-	,1^2-3^4-,3^4-	3	ENSG00000255717	SNHG1	processed_transcript	Non-Coding	D3.event1203.1	Non-Coding	0.00715449	0.0130923	0.165337	0.136979	106.53, 98.98, 90.19, 81.78, 72.43	129.25, 115.93, 109, 106.62, 100.62, 94	755.86, 694.47, 683.79, 593.4, 557	726.07, 720.03, 683.62, 627.28, 616.39, 590.77
ir.D3.event1203	11	-	62852811	62853590	D3.event1203.1,D3.event1203.2,D3.event1203.3	,62853552^62853115-62853075^62852839-,62853075^62852839-	,1^2-3^4-,3^4-	3	ENSG00000255717	SNHG1	processed_transcript	Non-Coding	D3.event1203.3	Non-Coding	0.00715449	1	0.308741	0.294969	226.63, 199.99, 197.87, 176, 168.34	226.03, 221.08, 218.54, 193.87, 188.79, 175.59	755.86, 694.47, 683.79, 593.4, 557	726.07, 720.03, 683.62, 627.28, 616.39, 590.77
D2.event8615	19	+	49107712	49108479	D2.event8615.1,D2.event8615.2	49107795-,49107822-	1-,2-	2	ENSG00000104852	SNRNP70	protein_coding	CDS	D2.event8615.1	Known-Coding	0.00726049	0	0.730484	0.644274	124, 116, 88, 84, 70	222, 189, 168, 160, 148, 145	198, 170, 143, 127, 110	281, 258, 232, 226, 208, 206
D2.event8615	19	+	49107712	49108479	D2.event8615.1,D2.event8615.2	49107795-,49107822-	1-,2-	2	ENSG00000104852	SNRNP70	protein_coding	CDS	D2.event8615.2	Known-Coding	0.00726049	0	0.269516	0.355726	74, 55, 54, 43, 40	69, 66, 64, 61, 60, 59	198, 170, 143, 127, 110	281, 258, 232, 226, 208, 206
D4.event2937	11	-	502062	506609	D4.event2937.1,D4.event2937.2,D4.event2937.3,D4.event2937.4	504996-504824^502249-,504996-504824^502181-,502249-,502181-	1-2^3-,1-2^4-,3-,4-	4	ENSG00000023191	RNH1	protein_coding	UTR-5	D4.event2937.4	UTR-5	0.00734515	0.000954	0.231614	0.0967458	8, 6, 4, 2, 2	13, 11, 10.5, 10, 7, 5	65.32, 49.61, 49.2, 45.23, 38.04	53.19, 49.22, 48.24, 46.25, 41.48, 36.56
D4.event2937	11	-	502062	506609	D4.event2937.1,D4.event2937.2,D4.event2937.3,D4.event2937.4	504996-504824^502249-,504996-504824^502181-,502249-,502181-	1-2^3-,1-2^4-,3-,4-	4	ENSG00000023191	RNH1	protein_coding	UTR-5	D4.event2937.1	UTR-5	0.00734515	0.642509	0.351234	0.441865	24.98, 23.66, 19.8, 19.08, 12.96	17.97, 17.32, 14.07, 13, 11.83, 11.49	65.32, 49.61, 49.2, 45.23, 38.04	53.19, 49.22, 48.24, 46.25, 41.48, 36.56
D4.event2937	11	-	502062	506609	D4.event2937.1,D4.event2937.2,D4.event2937.3,D4.event2937.4	504996-504824^502249-,504996-504824^502181-,502249-,502181-	1-2^3-,1-2^4-,3-,4-	4	ENSG00000023191	RNH1	protein_coding	UTR-5	D4.event2937.2	UTR-5	0.00734515	1	0.417152	0.46139	23.66, 21.63, 20.4, 20.15, 19.08	20.17, 19.25, 18.37, 17.25, 14.07, 12.65	65.32, 49.61, 49.2, 45.23, 38.04	53.19, 49.22, 48.24, 46.25, 41.48, 36.56
D3.event8193	18	-	79973856	79988240	D3.event8193.1,D3.event8193.2,D3.event8193.3	,79986750-79986602^79977701-79977598^,79977701-79977598^	,1-2^3-4^,3-4^	3	ENSG00000141759	TXNL4A	protein_coding	CDS.DOM	D3.event8193.1	Known-Coding	0.00734515	0.00267178	0.0950177	0.0641815	30, 28, 26, 25.5, 23	50, 47, 43, 39, 38, 37	464.67, 454.65, 395.62, 377.93, 374.33	515.55, 481.45, 466.13, 445.32, 395.17, 371.74
D3.event8193	18	-	79973856	79988240	D3.event8193.1,D3.event8193.2,D3.event8193.3	,79986750-79986602^79977701-79977598^,79977701-79977598^	,1-2^3-4^,3-4^	3	ENSG00000141759	TXNL4A	protein_coding	CDS.DOM	D3.event8193.2	Known-NMD	0.00734515	0.621904	0.161177	0.184477	86.83, 76.29, 73.92, 72.4, 71.74	86.96, 81.85, 76.2, 66.56, 62.71, 56.91	464.67, 454.65, 395.62, 377.93, 374.33	515.55, 481.45, 466.13, 445.32, 395.17, 371.74
D3.event8193	18	-	79973856	79988240	D3.event8193.1,D3.event8193.2,D3.event8193.3	,79986750-79986602^79977701-79977598^,79977701-79977598^	,1-2^3-4^,3-4^	3	ENSG00000141759	TXNL4A	protein_coding	CDS.DOM	D3.event8193.3	Known-Coding	0.00734515	1	0.743805	0.751341	362.27, 342.32, 293.33, 283.19, 272.41	383.7, 366.42, 351.49, 322.12, 290.61, 275.83	464.67, 454.65, 395.62, 377.93, 374.33	515.55, 481.45, 466.13, 445.32, 395.17, 371.74
D2.event11882	3	+	152445539	152447620	D2.event11882.1,D2.event11882.2	,152446704-152446757^	,1-2^	2	ENSG00000152601	MBNL1	protein_coding	CDS	D2.event11882.1	Known-Coding	0.00734515	0	0.15887	0.0756039	9, 6, 5, 5, 4	20, 15, 14, 14, 13, 12	83.42, 81.46, 79.99, 74.42, 66.97	105.98, 96.58, 95.5, 90.58, 85.67, 81.35
D2.event11882	3	+	152445539	152447620	D2.event11882.1,D2.event11882.2	,152446704-152446757^	,1-2^	2	ENSG00000152601	MBNL1	protein_coding	CDS	D2.event11882.2	Known-Coding	0.00734515	0	0.84113	0.924396	77.46, 77.42, 74.99, 69.42, 57.97	91.98, 82.5, 76.58, 75.58, 73.67, 67.35	83.42, 81.46, 79.99, 74.42, 66.97	105.98, 96.58, 95.5, 90.58, 85.67, 81.35
D2.event11677	3	+	50100051	50103083	D2.event11677.1,D2.event11677.2	,50100532-50100605^	,1-2^	2	ENSG00000003756	RBM5	protein_coding	CDS.DOM	D2.event11677.1	Known-Coding	0.00748373	0	0.12497	0.0573738	9, 7, 5, 4, 3	12, 10.5, 10, 10, 10, 8.5	118.36, 102.91, 98.92, 85.15, 83.24	92.38, 85.57, 84.47, 78.85, 77.08, 70.6
D2.event11677	3	+	50100051	50103083	D2.event11677.1,D2.event11677.2	,50100532-50100605^	,1-2^	2	ENSG00000003756	RBM5	protein_coding	CDS.DOM	D2.event11677.2	Known-Coding	0.00748373	0	0.87503	0.942626	111.36, 94.92, 93.91, 80.24, 80.15	80.38, 77.07, 73.97, 68.85, 67.08, 60.6	118.36, 102.91, 98.92, 85.15, 83.24	92.38, 85.57, 84.47, 78.85, 77.08, 70.6
D2.event6114	16	+	489000	496824	D2.event6114.1,D2.event6114.2	,491134-491268^	,1-2^	2	ENSG00000090565	RAB11FIP3	protein_coding	CDS	D2.event6114.1	Known-Coding	0.00757914	0	0.465296	0.284361	17.5, 17, 12.5, 12, 9	18, 17, 17, 17, 11, 10	53.39, 49.47, 46.32, 45.77, 44.24	42.5, 37.08, 34.89, 30.42, 25.2, 23.49
D2.event6114	16	+	489000	496824	D2.event6114.1,D2.event6114.2	,491134-491268^	,1-2^	2	ENSG00000090565	RAB11FIP3	protein_coding	CDS	D2.event6114.2	Known-Coding	0.00757914	0	0.534704	0.715639	37.47, 35.89, 35.24, 33.82, 28.77	25.5, 19.08, 17.89, 15.2, 13.42, 12.49	53.39, 49.47, 46.32, 45.77, 44.24	42.5, 37.08, 34.89, 30.42, 25.2, 23.49
D2.event2402	10	-	128113602	128116491	D2.event2402.1,D2.event2402.2	,128116007-128114928^	,1-2^	2	ENSG00000148773	MKI67	protein_coding	CDS	D2.event2402.1	Known-Coding	0.00801171	0	0.276464	0.150838	14, 9, 9, 5, 4.5	25, 24, 23, 21.5, 17.5, 15.5	65.96, 60.13, 54.3, 50.7, 43.41	82.84, 82.69, 78.39, 72.79, 70.9, 70.62
D2.event2402	10	-	128113602	128116491	D2.event2402.1,D2.event2402.2	,128116007-128114928^	,1-2^	2	ENSG00000148773	MKI67	protein_coding	CDS	D2.event2402.2	Known-Coding	0.00801171	0	0.723536	0.849162	51.96, 51.13, 49.3, 46.2, 34.41	61.34, 58.69, 57.29, 53.4, 53.39, 47.62	65.96, 60.13, 54.3, 50.7, 43.41	82.84, 82.69, 78.39, 72.79, 70.9, 70.62
D2.event12584	4	+	2904764	2907743	D2.event12584.1,D2.event12584.2	2905015^,2905108^	1^,2^	2	ENSG00000087274	ADD1	protein_coding	CDS	D2.event12584.1	Known-Coding	0.00804079	0	0.786009	0.848932	192, 184, 183, 183, 152	178, 170, 170, 164, 155, 148	223, 223, 219, 212, 176	226, 216, 208, 207, 203, 193
D2.event12584	4	+	2904764	2907743	D2.event12584.1,D2.event12584.2	2905015^,2905108^	1^,2^	2	ENSG00000087274	ADD1	protein_coding	CDS	D2.event12584.2	Known-Coding	0.00804079	0	0.213991	0.151068	40, 35, 31, 29, 24	53, 48, 46, 45, 39, 37	223, 223, 219, 212, 176	226, 216, 208, 207, 203, 193
ir.D5.event1548	12	-	6849198	6850467	D5.event1548.1,D5.event1548.2,D5.event1548.3,D5.event1548.4,D5.event1548.5	6849858-6849565^,6849858-6849565^6849429-6849323^,6849858-6849565^6849413-6849323^,6849858-6849323^,6849783-6849565^6849429-6849323^	1-3^,1-3^4-6^,1-3^5-6^,1-6^,2-3^4-6^	5	ENSG00000111665	CDCA3	protein_coding	CDS	D5.event1548.1	Known-Coding	0.00832539	0.00327822	0.130837	0.182374	57.45, 50.79, 44.13, 39.12, 31.11	56.72, 51.83, 46.96, 46.65, 41.29, 39.02	269.38, 267.1, 243.83, 223.25, 216.98	408.01, 388.6, 363.03, 362.22, 318.74, 318.37
ir.D5.event1548	12	-	6849198	6850467	D5.event1548.1,D5.event1548.2,D5.event1548.3,D5.event1548.4,D5.event1548.5	6849858-6849565^,6849858-6849565^6849429-6849323^,6849858-6849565^6849413-6849323^,6849858-6849323^,6849783-6849565^6849429-6849323^	1-3^,1-3^4-6^,1-3^5-6^,1-6^,2-3^4-6^	5	ENSG00000111665	CDCA3	protein_coding	CDS	D5.event1548.5	Known-Coding	0.00832539	0.905552	0.140573	0.112395	31.82, 31.68, 27.32, 25.39, 20.97	62.67, 54.39, 50.81, 48.04, 44.79, 42.79	269.38, 267.1, 243.83, 223.25, 216.98	408.01, 388.6, 363.03, 362.22, 318.74, 318.37
ir.D5.event1548	12	-	6849198	6850467	D5.event1548.1,D5.event1548.2,D5.event1548.3,D5.event1548.4,D5.event1548.5	6849858-6849565^,6849858-6849565^6849429-6849323^,6849858-6849565^6849413-6849323^,6849858-6849323^,6849783-6849565^6849429-6849323^	1-3^,1-3^4-6^,1-3^5-6^,1-6^,2-3^4-6^	5	ENSG00000111665	CDCA3	protein_coding	CDS	D5.event1548.2	Known-Coding	0.00832539	1	0.435509	0.401274	110.99, 100.48, 97.19, 91.46, 89.65	179.69, 163.62, 159.62, 153.93, 148.24, 135.15	269.38, 267.1, 243.83, 223.25, 216.98	408.01, 388.6, 363.03, 362.22, 318.74, 318.37
ir.D5.event1548	12	-	6849198	6850467	D5.event1548.1,D5.event1548.2,D5.event1548.3,D5.event1548.4,D5.event1548.5	6849858-6849565^,6849858-6849565^6849429-6849323^,6849858-6849565^6849413-6849323^,6849858-6849323^,6849783-6849565^6849429-6849323^	1-3^,1-3^4-6^,1-3^5-6^,1-6^,2-3^4-6^	5	ENSG00000111665	CDCA3	protein_coding	CDS	D5.event1548.3	Known-Coding	0.00832539	1	0.142744	0.153369	42.46, 39.19, 37.96, 34.34, 33.24	58.32, 56.95, 56.7, 52.81, 46.62, 36.78	269.38, 267.1, 243.83, 223.25, 216.98	408.01, 388.6, 363.03, 362.22, 318.74, 318.37
ir.D5.event1548	12	-	6849198	6850467	D5.event1548.1,D5.event1548.2,D5.event1548.3,D5.event1548.4,D5.event1548.5	6849858-6849565^,6849858-6849565^6849429-6849323^,6849858-6849565^6849413-6849323^,6849858-6849323^,6849783-6849565^6849429-6849323^	1-3^,1-3^4-6^,1-3^5-6^,1-6^,2-3^4-6^	5	ENSG00000111665	CDCA3	protein_coding	CDS	D5.event1548.4	PTC_50_All	0.00832539	1	0.150337	0.150588	45.74, 37.96, 37.23, 36.49, 26.38	68.16, 60.63, 56.12, 52.99, 49.91, 36.77	269.38, 267.1, 243.83, 223.25, 216.98	408.01, 388.6, 363.03, 362.22, 318.74, 318.37
D2.event14641	6	-	111699670	111702885	D2.event14641.1,D2.event14641.2	,111700268-111700104^	,1-2^	2	ENSG00000010810	FYN	protein_coding	CDS.DOM	D2.event14641.1	Known-Coding	0.00842449	0	0.347713	0.551137	44, 32.5, 31.5, 30, 26	27.5, 21.5, 20, 19.5, 18, 11	72.47, 58.9, 57.91, 57.3, 53.58	64.81, 61.01, 60.35, 53.69, 50.59, 48.14
D2.event14641	6	-	111699670	111702885	D2.event14641.1,D2.event14641.2	,111700268-111700104^	,1-2^	2	ENSG00000010810	FYN	protein_coding	CDS.DOM	D2.event14641.2	Frameshift_PTC_50_Any	0.00842449	0	0.652287	0.448863	39.97, 31.91, 28.9, 22.08, 13.3	43.01, 42.69, 40.35, 37.31, 29.09, 28.64	72.47, 58.9, 57.91, 57.3, 53.58	64.81, 61.01, 60.35, 53.69, 50.59, 48.14
D4.event5278	14	-	54427841	54436369	D4.event5278.2,D4.event5278.3,D4.event5278.4	54432220-54432108^,54432220-54432108^54430404-54430261^,54430404-54430261^	1-2^,1-2^3-4^,3-4^	3	ENSG00000100528	CNIH1	protein_coding	CDS.DOM	D4.event5278.4	Known-Coding	0.00850111	0.00126192	0.0835811	0.143851	72.25, 56.39, 46.51, 45.06, 30.05	45.17, 38.11, 30.67, 26.38, 18.57, 18.22	389.62, 353.61, 339.78, 321.48, 318.33	394.63, 392.52, 372.67, 329, 316.12, 297.82
D4.event5278	14	-	54427841	54436369	D4.event5278.2,D4.event5278.3,D4.event5278.4	54432220-54432108^,54432220-54432108^54430404-54430261^,54430404-54430261^	1-2^,1-2^3-4^,3-4^	3	ENSG00000100528	CNIH1	protein_coding	CDS.DOM	D4.event5278.3	Known-Coding	0.00850111	0.0126332	0.843804	0.778954	289.71, 272.79, 266.69, 259.73, 251.5	332.47, 325.27, 303.67, 294.27, 264.28, 252.52	389.62, 353.61, 339.78, 321.48, 318.33	394.63, 392.52, 372.67, 329, 316.12, 297.82
D4.event5278	14	-	54427841	54436369	D4.event5278.2,D4.event5278.3,D4.event5278.4	54432220-54432108^,54432220-54432108^54430404-54430261^,54430404-54430261^	1-2^,1-2^3-4^,3-4^	3	ENSG00000100528	CNIH1	protein_coding	CDS.DOM	D4.event5278.2	Known-Coding	0.00850111	1	0.0726145	0.077195	33.54, 30.53, 27.66, 24.92, 15.49	35.78, 33.62, 29.14, 23.83, 16.16, 14.63	389.62, 353.61, 339.78, 321.48, 318.33	394.63, 392.52, 372.67, 329, 316.12, 297.82
ir.D2.event1958	14	+	105368085	105368539	D2.event1958.1,D2.event1958.2	,105368147^105368459-	,1^2-	2	ENSG00000179364	PACS2	protein_coding	CDS	D2.event1958.2	Known-Coding	0.00875828	0	0.546636	0.678294	56, 52, 48, 39, 37	57, 48, 48, 43, 35, 34	85, 77, 63, 59, 58	98, 93, 85, 85, 68, 56
ir.D2.event1958	14	+	105368085	105368539	D2.event1958.1,D2.event1958.2	,105368147^105368459-	,1^2-	2	ENSG00000179364	PACS2	protein_coding	CDS	D2.event1958.1	PTC_50_All	0.00875828	0	0.453364	0.321706	29, 25, 21, 20, 15	50, 41, 37, 37, 33, 22	85, 77, 63, 59, 58	98, 93, 85, 85, 68, 56
ir.D3.event2916	17	-	15977092	15978044	D3.event2916.1,D3.event2916.2,D3.event2916.3	,15977913-15977800^15977700-15977579^,15977913-15977579^	,1-2^3-4^,1-4^	3	ENSG00000214941	ZSWIM7	protein_coding	UTR-3	D3.event2916.1	UTR-3	0.00887815	0.00116803	0.308157	0.513126	23, 23, 21, 20.5, 20	13, 8, 8, 8, 6, 6	44.33, 42.36, 41.31, 41.16, 40.34	36.53, 27.93, 25.46, 24.98, 24.68, 19.43
ir.D3.event2916	17	-	15977092	15978044	D3.event2916.1,D3.event2916.2,D3.event2916.3	,15977913-15977800^15977700-15977579^,15977913-15977579^	,1-2^3-4^,1-4^	3	ENSG00000214941	ZSWIM7	protein_coding	UTR-3	D3.event2916.3	UTR-3	0.00887815	0.268853	0.319162	0.20864	9.21, 9.16, 8.85, 8.73, 7.76	10.97, 9.19, 8.71, 8.24, 7.7, 5.94	44.33, 42.36, 41.31, 41.16, 40.34	36.53, 27.93, 25.46, 24.98, 24.68, 19.43
ir.D3.event2916	17	-	15977092	15978044	D3.event2916.1,D3.event2916.2,D3.event2916.3	,15977913-15977800^15977700-15977579^,15977913-15977579^	,1-2^3-4^,1-4^	3	ENSG00000214941	ZSWIM7	protein_coding	UTR-3	D3.event2916.2	UTR-3	0.00887815	0.890961	0.372681	0.278234	12.6, 12, 11.6, 11.6, 10.49	12.56, 10.74, 9.97, 9.28, 9.22, 7.49	44.33, 42.36, 41.31, 41.16, 40.34	36.53, 27.93, 25.46, 24.98, 24.68, 19.43
D2.event2224	10	-	73030370	73046925	D2.event2224.1,D2.event2224.2	73045051-73044981^,73043957-73043887^	1-2^,3-4^	2	ENSG00000122884	P4HA1	protein_coding	CDS	D2.event2224.2	Known-Coding	0.00915761	0	0.67749	0.574107	67.76, 52.54, 52.32, 49.7, 37.99	147.96, 145.29, 127.28, 119.75, 117.32, 114.14	115.59, 94.37, 93.53, 79.43, 70.49	213.91, 202.45, 188.4, 181.81, 179.72, 172.29
D2.event2224	10	-	73030370	73046925	D2.event2224.1,D2.event2224.2	73045051-73044981^,73043957-73043887^	1-2^,3-4^	2	ENSG00000122884	P4HA1	protein_coding	CDS	D2.event2224.1	Known-Coding	0.00915761	0	0.32251	0.425893	47.83, 44.67, 40.99, 32.5, 27.11	68.65, 65.95, 64.49, 58.15, 57.16, 52.44	115.59, 94.37, 93.53, 79.43, 70.49	213.91, 202.45, 188.4, 181.81, 179.72, 172.29
D3.event14435	6	-	30199153	30213305	D3.event14435.1,D3.event14435.2,D3.event14435.3	,30204765-30204656^30201138-30201035^,30201138-30201035^	,1-2^3-4^,3-4^	3	ENSG00000234127	TRIM26	protein_coding	UTR-5	D3.event14435.1	UTR-5	0.00915819	0.00276975	0.155426	0.0514958	5, 2, 2, 2, 1	8, 7, 7, 5, 5, 4	54.53, 48.48, 46.36, 42.68, 41.13	43.93, 42.9, 37.87, 37.5, 35.22, 34.31
D3.event14435	6	-	30199153	30213305	D3.event14435.1,D3.event14435.2,D3.event14435.3	,30204765-30204656^30201138-30201035^,30201138-30201035^	,1-2^3-4^,3-4^	3	ENSG00000234127	TRIM26	protein_coding	UTR-5	D3.event14435.2	UTR-5	0.00915819	0.117397	0.494122	0.616945	33.56, 29.96, 28.28, 26.03, 26.03	21.34, 19.93, 19, 18.78, 18.22, 17.23	54.53, 48.48, 46.36, 42.68, 41.13	43.93, 42.9, 37.87, 37.5, 35.22, 34.31
D3.event14435	6	-	30199153	30213305	D3.event14435.1,D3.event14435.2,D3.event14435.3	,30204765-30204656^30201138-30201035^,30201138-30201035^	,1-2^3-4^,3-4^	3	ENSG00000234127	TRIM26	protein_coding	UTR-5	D3.event14435.3	UTR-5	0.00915819	1	0.350452	0.331559	18.97, 18.33, 15.65, 15.2, 9.17	19.9, 15.59, 13.64, 12, 10.72, 9.38	54.53, 48.48, 46.36, 42.68, 41.13	43.93, 42.9, 37.87, 37.5, 35.22, 34.31
ir.D2.event218	1	+	153746957	153748755	D2.event218.1,D2.event218.2	,153747070^153747279-153747363^153748689-	,1^2-3^4-	2	ENSG00000143624	INTS3	protein_coding	CDS	D2.event218.1	PTC_50_All	0.0092307	0	0.13377	0.229066	16.43, 15.43, 14.97, 14.97, 14.49	16.43, 12, 10.82, 10.49, 10.39, 9.67	75.23, 72.39, 66.52, 60.4, 58.51	100.39, 93.47, 88.66, 83.36, 81.42, 74.49
ir.D2.event218	1	+	153746957	153748755	D2.event218.1,D2.event218.2	,153747070^153747279-153747363^153748689-	,1^2-3^4-	2	ENSG00000143624	INTS3	protein_coding	CDS	D2.event218.2	Known-Coding	0.0092307	0	0.86623	0.770934	60.26, 55.96, 51.09, 45.43, 44.02	90, 77.84, 77.04, 71.75, 71.36, 64	75.23, 72.39, 66.52, 60.4, 58.51	100.39, 93.47, 88.66, 83.36, 81.42, 74.49
ir.D6.event3357	19	+	49101471	49107712	D6.event3357.1,D6.event3357.3,D6.event3357.5,D6.event3357.6	49102114-49102173^49104634-49104735^49107625-,49102114-49103587^49104634-49104735^49107625-,49104634-,49104634-49104735^49107625-	1-2^4-5^6-,1-3^4-5^6-,4-,4-5^6-	4	ENSG00000104852	SNRNP70	protein_coding	CDS.DOM	D6.event3357.3	Known-NMD	0.0092307	0.00865823	0.0608313	0.0943227	58.18, 46.63, 30.47, 30.12, 25.9	42.8, 41.38, 37.39, 27, 24.15, 23.63	490.77, 406.71, 393.53, 365.7, 355.36	572.91, 567.89, 541.31, 519.65, 511.31, 505.83
ir.D6.event3357	19	+	49101471	49107712	D6.event3357.1,D6.event3357.3,D6.event3357.5,D6.event3357.6	49102114-49102173^49104634-49104735^49107625-,49102114-49103587^49104634-49104735^49107625-,49104634-,49104634-49104735^49107625-	1-2^4-5^6-,1-3^4-5^6-,4-,4-5^6-	4	ENSG00000104852	SNRNP70	protein_coding	CDS.DOM	D6.event3357.6	Known-Coding	0.0092307	0.0134766	0.70739	0.650843	311.01, 267.65, 261.81, 243.74, 224.82	410.76, 407.95, 390.43, 358.6, 355.73, 354.49	490.77, 406.71, 393.53, 365.7, 355.36	572.91, 567.89, 541.31, 519.65, 511.31, 505.83
ir.D6.event3357	19	+	49101471	49107712	D6.event3357.1,D6.event3357.3,D6.event3357.5,D6.event3357.6	49102114-49102173^49104634-49104735^49107625-,49102114-49103587^49104634-49104735^49107625-,49104634-,49104634-49104735^49107625-	1-2^4-5^6-,1-3^4-5^6-,4-,4-5^6-	4	ENSG00000104852	SNRNP70	protein_coding	CDS.DOM	D6.event3357.1	Known-NMD	0.0092307	1	0.0945254	0.109029	56.18, 49.54, 48.37, 33.15, 32.33	58.09, 56.16, 54.09, 53.81, 47.11, 34.83	490.77, 406.71, 393.53, 365.7, 355.36	572.91, 567.89, 541.31, 519.65, 511.31, 505.83
ir.D6.event3357	19	+	49101471	49107712	D6.event3357.1,D6.event3357.3,D6.event3357.5,D6.event3357.6	49102114-49102173^49104634-49104735^49107625-,49102114-49103587^49104634-49104735^49107625-,49104634-,49104634-49104735^49107625-	1-2^4-5^6-,1-3^4-5^6-,4-,4-5^6-	4	ENSG00000104852	SNRNP70	protein_coding	CDS.DOM	D6.event3357.5	PTC_50_All	0.0092307	1	0.137254	0.145805	65.4, 60.1, 58.69, 56.28, 51.7	78.99, 76.57, 74.38, 72.38, 69.97, 68.21	490.77, 406.71, 393.53, 365.7, 355.36	572.91, 567.89, 541.31, 519.65, 511.31, 505.83
ir.D3.event4325	22	+	20126303	20127181	D3.event4325.1,D3.event4325.2,D3.event4325.3	,20126368^20126952-,20126368^20126955-	,1^2-,1^3-	3	ENSG00000099901	RANBP1	protein_coding	CDS.DOM	D3.event4325.3	Known-Coding	0.0092307	0.001102	0.391835	0.355133	470, 406.5, 395, 391.5, 383	610, 545, 525, 516, 466, 444	1339, 1117.5, 1113.5, 1112, 1080	1532.5, 1453, 1313, 1249.5, 1191, 1187.5
ir.D3.event4325	22	+	20126303	20127181	D3.event4325.1,D3.event4325.2,D3.event4325.3	,20126368^20126952-,20126368^20126955-	,1^2-,1^3-	3	ENSG00000099901	RANBP1	protein_coding	CDS.DOM	D3.event4325.2	Known-Coding	0.0092307	0.00158983	0.600899	0.636953	856.5, 728.5, 713.5, 694, 678	913.5, 899, 778.5, 735.5, 726.5, 710.5	1339, 1117.5, 1113.5, 1112, 1080	1532.5, 1453, 1313, 1249.5, 1191, 1187.5
ir.D3.event4325	22	+	20126303	20127181	D3.event4325.1,D3.event4325.2,D3.event4325.3	,20126368^20126952-,20126368^20126955-	,1^2-,1^3-	3	ENSG00000099901	RANBP1	protein_coding	CDS.DOM	D3.event4325.1	Known-Coding	0.0092307	1	0.00726545	0.00791408	13, 12.5, 7, 7, 6	11.5, 11, 9.5, 9, 9, 7	1339, 1117.5, 1113.5, 1112, 1080	1532.5, 1453, 1313, 1249.5, 1191, 1187.5
ir.D3.event4613	3	+	52480295	52484637	D3.event4613.1,D3.event4613.3	52480879-,52484513-	1-,2-	2	ENSG00000010322	NISCH	protein_coding	CDS	D3.event4613.3	Known-Coding	0.0092307	0	0.775683	0.641052	58, 43, 43, 35, 29	63, 59, 56.5, 56.5, 52, 51	79.35, 70.46, 62.39, 59.73, 51.91	76.03, 75.96, 72.62, 72.41, 72.21, 66.07
ir.D3.event4613	3	+	52480295	52484637	D3.event4613.1,D3.event4613.3	52480879-,52484513-	1-,2-	2	ENSG00000010322	NISCH	protein_coding	CDS	D3.event4613.1	PTC_50_All	0.0092307	0	0.224317	0.358948	27.46, 27.39, 22.91, 21.35, 16.73	21.21, 17.03, 16.12, 15.91, 14.07, 12.96	79.35, 70.46, 62.39, 59.73, 51.91	76.03, 75.96, 72.62, 72.41, 72.21, 66.07
ir.D3.event4190	20	-	2796247	2797094	D3.event4190.1,D3.event4190.2,D3.event4190.3	2797006^2796650-,2797006^2796650-2796527^2796443-,2796527^2796443-	1^2-,1^2-3^4-,3^4-	3	ENSG00000088882	CPXM1	protein_coding	CDS.DOM	D3.event4190.2	Known-Coding	0.00927813	0.00652696	0.583091	0.523128	137.18, 121.79, 106.13, 103.15, 84.44	503.61, 466.02, 448.71, 424.17, 421.5, 412.25	258.94, 225.53, 208.11, 203.64, 160.29	881.71, 805.64, 743.49, 738.86, 722.43, 697.65
ir.D3.event4190	20	-	2796247	2797094	D3.event4190.1,D3.event4190.2,D3.event4190.3	2797006^2796650-,2797006^2796650-2796527^2796443-,2796527^2796443-	1^2-,1^2-3^4-,3^4-	3	ENSG00000088882	CPXM1	protein_coding	CDS.DOM	D3.event4190.3	PTC_50_All	0.00927813	0.00926781	0.17166	0.217745	52.12, 51.38, 49.57, 42.66, 34.32	149.97, 140.5, 133.36, 129, 117.92, 117.13	258.94, 225.53, 208.11, 203.64, 160.29	881.71, 805.64, 743.49, 738.86, 722.43, 697.65
ir.D3.event4190	20	-	2796247	2797094	D3.event4190.1,D3.event4190.2,D3.event4190.3	2797006^2796650-,2797006^2796650-2796527^2796443-,2796527^2796443-	1^2-,1^2-3^4-,3^4-	3	ENSG00000088882	CPXM1	protein_coding	CDS.DOM	D3.event4190.1	PTC_50_All	0.00927813	1	0.245249	0.259127	69.64, 57.83, 54.17, 50.6, 41.53	228.13, 206.26, 181.49, 173.02, 169.26, 167.48	258.94, 225.53, 208.11, 203.64, 160.29	881.71, 805.64, 743.49, 738.86, 722.43, 697.65
ir.D3.event900	11	+	13710693	13712046	D3.event900.1,D3.event900.2,D3.event900.3	13710870^13711764-,13710870^13711764-13711808^13711928-,13711808^13711928-	1^2-,1^2-3^4-,3^4-	3	ENSG00000197601	FAR1	protein_coding	CDS.DOM	D3.event900.1	PTC_50_All	0.00932747	0.00727765	0.115923	0.17419	37.31, 30.17, 27.82, 26.5, 23.37	24, 19.13, 18.33, 17.66, 17.32, 14.83	183.86, 169.88, 162.26, 159.24, 158.16	188.58, 167.42, 164.4, 159.31, 144.95, 135.2
ir.D3.event900	11	+	13710693	13712046	D3.event900.1,D3.event900.2,D3.event900.3	13710870^13711764-,13710870^13711764-13711808^13711928-,13711808^13711928-	1^2-,1^2-3^4-,3^4-	3	ENSG00000197601	FAR1	protein_coding	CDS.DOM	D3.event900.2	Known-Coding	0.00932747	0.0115381	0.647459	0.569258	101.41, 98.27, 93.95, 91.36, 89.43	121.5, 112.47, 108.41, 102.29, 93.81, 82.99	183.86, 169.88, 162.26, 159.24, 158.16	188.58, 167.42, 164.4, 159.31, 144.95, 135.2
ir.D3.event900	11	+	13710693	13712046	D3.event900.1,D3.event900.2,D3.event900.3	13710870^13711764-,13710870^13711764-13711808^13711928-,13711808^13711928-	1^2-,1^2-3^4-,3^4-	3	ENSG00000197601	FAR1	protein_coding	CDS.DOM	D3.event900.3	PTC_50_All	0.00932747	1	0.236618	0.256552	48.28, 45.1, 41.38, 40.91, 38.14	47.95, 40.12, 38.33, 33.88, 33.82, 33.02	183.86, 169.88, 162.26, 159.24, 158.16	188.58, 167.42, 164.4, 159.31, 144.95, 135.2
ir.D3.event5075	4	-	82424883	82426129	D3.event5075.1,D3.event5075.2,D3.event5075.3	82426037^,82426037^82425667-82425563^,82425563^	1^,1^2-3^,3^	3	ENSG00000152795	HNRNPDL	protein_coding	UTR-3	D3.event5075.1	UTR-3	0.00932747	0.00259008	0.820249	0.850328	963.5, 849.5, 842, 742, 679	916, 767.5, 763, 726, 695, 692	1125.36, 987.15, 986.61, 886.13, 806.89	1112.33, 939.24, 925.7, 882.03, 876.15, 823.13
ir.D3.event5075	4	-	82424883	82426129	D3.event5075.1,D3.event5075.2,D3.event5075.3	82426037^,82426037^82425667-82425563^,82425563^	1^,1^2-3^,3^	3	ENSG00000152795	HNRNPDL	protein_coding	UTR-3	D3.event5075.2	UTR-3	0.00932747	0.0223686	0.0716054	0.0548826	61.34, 53.74, 51.77, 47.92, 47.75	77.78, 74.33, 73.48, 61.34, 58.15, 52.76	1125.36, 987.15, 986.61, 886.13, 806.89	1112.33, 939.24, 925.7, 882.03, 876.15, 823.13
ir.D3.event5075	4	-	82424883	82426129	D3.event5075.1,D3.event5075.2,D3.event5075.3	82426037^,82426037^82425667-82425563^,82425563^	1^,1^2-3^,3^	3	ENSG00000152795	HNRNPDL	protein_coding	UTR-3	D3.event5075.3	UTR-3	0.00932747	0.645826	0.108146	0.0947895	100.52, 93.38, 90.39, 89.19, 80.14	122, 112.25, 102.76, 96.86, 92, 75.37	1125.36, 987.15, 986.61, 886.13, 806.89	1112.33, 939.24, 925.7, 882.03, 876.15, 823.13
D2.event1959	10	+	84477664	84513449	D2.event1959.1,D2.event1959.2	,84499875-84499959^	,1-2^	2	ENSG00000107771	CCSER2	protein_coding	CDS	D2.event1959.2	Known-Coding	0.00945051	0	0.335611	0.510624	28.14, 21.54, 19.44, 18.76, 18.44	18, 14.46, 13.42, 13.42, 7.94, 7.35	57.14, 40.54, 39.76, 38.44, 32.44	52.46, 50, 33.94, 33.42, 31.42, 21.35
D2.event1959	10	+	84477664	84513449	D2.event1959.1,D2.event1959.2	,84499875-84499959^	,1-2^	2	ENSG00000107771	CCSER2	protein_coding	CDS	D2.event1959.1	Known-Coding	0.00945051	0	0.664389	0.489376	29, 21, 19, 19, 14	38, 32, 26, 20, 18, 14	57.14, 40.54, 39.76, 38.44, 32.44	52.46, 50, 33.94, 33.42, 31.42, 21.35
D2.event16420	9	+	128591625	128594175	D2.event16420.1,D2.event16420.2	,128592983-128593042^	,1-2^	2	ENSG00000197694	SPTAN1	protein_coding	CDS	D2.event16420.2	Known-Coding	0.00945463	0	0.29674	0.229074	65.45, 57.99, 57.78, 53.96, 51.76	62.97, 60.99, 58.97, 57.78, 54.96, 50.48	285.45, 267.99, 249.76, 232.96, 217.78	211.78, 198.97, 197.99, 197.48, 190.97, 169.96
D2.event16420	9	+	128591625	128594175	D2.event16420.1,D2.event16420.2	,128592983-128593042^	,1-2^	2	ENSG00000197694	SPTAN1	protein_coding	CDS	D2.event16420.1	Known-Coding	0.00945463	0	0.70326	0.770926	220, 210, 198, 179, 160	154, 147, 137, 136, 132, 115	285.45, 267.99, 249.76, 232.96, 217.78	211.78, 198.97, 197.99, 197.48, 190.97, 169.96
D2.event4139	12	-	53314441	53315094	D2.event4139.1,D2.event4139.2	,53314849-53314751^	,1-2^	2	ENSG00000094914	AAAS	protein_coding	CDS.DOM	D2.event4139.1	Known-Coding	0.00951976	0	0.119485	0.187667	50, 40, 36, 31, 28	30, 30, 26, 23, 17, 16	218.49, 217.99, 188.68, 186.5, 174.43	215.39, 214, 201.46, 189.5, 188.02, 180.44
D2.event4139	12	-	53314441	53315094	D2.event4139.1,D2.event4139.2	,53314849-53314751^	,1-2^	2	ENSG00000094914	AAAS	protein_coding	CDS.DOM	D2.event4139.2	Known-Coding	0.00951976	0	0.880515	0.812333	181.99, 178.49, 157.68, 146.43, 136.5	189.39, 184, 172.5, 171.46, 165.02, 164.44	218.49, 217.99, 188.68, 186.5, 174.43	215.39, 214, 201.46, 189.5, 188.02, 180.44
ir.D3.event3229	19	+	8474244	8486405	D3.event3229.1,D3.event3229.2,D3.event3229.3	8483158-,8483158-8483211^8485603-,8485603-	1-,1-2^3-,3-	3	ENSG00000099783	HNRNPM	protein_coding	CDS.DOM	D3.event3229.3	Known-Coding	0.00954752	0.00926991	0.162988	0.123941	62.5, 52, 42, 42, 37	83, 81.5, 79, 57, 57, 53	399.63, 399.54, 372.87, 364.72, 361.61	464.78, 447.85, 442.02, 389.49, 389.07, 382.75
ir.D3.event3229	19	+	8474244	8486405	D3.event3229.1,D3.event3229.2,D3.event3229.3	8483158-,8483158-8483211^8485603-,8485603-	1-,1-2^3-,3-	3	ENSG00000099783	HNRNPM	protein_coding	CDS.DOM	D3.event3229.1	PTC_50_All	0.00954752	0.204501	0.127472	0.155501	62.09, 60.37, 60.15, 59.4, 52.98	60.2, 58.51, 55.24, 51.37, 51.34, 43.82	399.63, 399.54, 372.87, 364.72, 361.61	464.78, 447.85, 442.02, 389.49, 389.07, 382.75
ir.D3.event3229	19	+	8474244	8486405	D3.event3229.1,D3.event3229.2,D3.event3229.3	8483158-,8483158-8483211^8485603-,8485603-	1-,1-2^3-,3-	3	ENSG00000099783	HNRNPM	protein_coding	CDS.DOM	D3.event3229.2	Known-Coding	0.00954752	1	0.709541	0.720558	285.54, 276.67, 271.63, 271.47, 262.57	325.58, 311.11, 300.51, 288.67, 284.7, 274.41	399.63, 399.54, 372.87, 364.72, 361.61	464.78, 447.85, 442.02, 389.49, 389.07, 382.75
D2.event2754	11	+	83167415	83168428	D2.event2754.1,D2.event2754.2	83167505^,83167898^	1^,2^	2	ENSG00000165494	PCF11	protein_coding	CDS	D2.event2754.1	Known-Coding	0.00976716	0	0.621842	0.744681	72, 72, 70, 58, 50	49, 45, 44, 43, 40, 40	95, 95, 90, 84, 68	83, 70, 69, 68, 67, 63
D2.event2754	11	+	83167415	83168428	D2.event2754.1,D2.event2754.2	83167505^,83167898^	1^,2^	2	ENSG00000165494	PCF11	protein_coding	CDS	D2.event2754.2	Known-Coding	0.00976716	0	0.378158	0.255319	26, 23, 23, 20, 18	38, 28, 26, 24, 23, 20	95, 95, 90, 84, 68	83, 70, 69, 68, 67, 63
D2.event14335	6	+	142382019	142390258	D2.event14335.1,D2.event14335.2	,142383760-142383843^	,1-2^	2	ENSG00000112414	GPR126	protein_coding	CDS.DOM	D2.event14335.2	Known-Coding	0.00976716	0	0.332471	0.18808	32.56, 22.96, 21.82, 19.08, 18.33	24.74, 15.1, 12.49, 12.33, 8.06, 6.93	129.08, 126.33, 121.96, 120.56, 115.82	57.74, 40.1, 38.06, 36.33, 35.93, 29.49
D2.event14335	6	+	142382019	142390258	D2.event14335.1,D2.event14335.2	,142383760-142383843^	,1-2^	2	ENSG00000112414	GPR126	protein_coding	CDS.DOM	D2.event14335.1	Known-Coding	0.00976716	0	0.667529	0.81192	110, 108, 99, 94, 88	33, 30, 29, 25, 24, 17	129.08, 126.33, 121.96, 120.56, 115.82	57.74, 40.1, 38.06, 36.33, 35.93, 29.49
D2.event7647	17	-	43532939	43533859	D2.event7647.1,D2.event7647.2	,43533348-43533187^	,1-2^	2	ENSG00000175832	ETV4	protein_coding	CDS.DOM	D2.event7647.1	Known-Coding	0.00978172	0	0.094212	0.179004	13, 10, 9, 9, 8	35.5, 23, 19.5, 19, 17, 15	62.94, 59.25, 56.84, 48.87, 46.76	304.72, 281.25, 214.74, 199.5, 191.5, 180.89
D2.event7647	17	-	43532939	43533859	D2.event7647.1,D2.event7647.2	,43533348-43533187^	,1-2^	2	ENSG00000175832	ETV4	protein_coding	CDS.DOM	D2.event7647.2	Known-Coding	0.00978172	0	0.905788	0.820996	49.94, 49.25, 48.84, 39.87, 37.76	285.72, 245.75, 191.74, 180, 176.5, 163.89	62.94, 59.25, 56.84, 48.87, 46.76	304.72, 281.25, 214.74, 199.5, 191.5, 180.89
D4.event12507	3	-	185925626	185937825	D4.event12507.1,D4.event12507.2,D4.event12507.4	,185931852-185931577^185926734-185926601^,185926734-185926601^	,1-2^3-4^,3-4^	3	ENSG00000136527	TRA2B	protein_coding	CDS	D4.event12507.2	Known-NMD	0.00981116	0.00228825	0.15504	0.124101	125.09, 124.73, 119.2, 117.37, 97.5	133.7, 120.56, 118.52, 114.6, 108.02, 106.71	1052.12, 974.82, 913.56, 887.48, 880.48	789.91, 788.05, 775.42, 766.37, 756.08, 655.32
D4.event12507	3	-	185925626	185937825	D4.event12507.1,D4.event12507.2,D4.event12507.4	,185931852-185931577^185926734-185926601^,185926734-185926601^	,1-2^3-4^,3-4^	3	ENSG00000136527	TRA2B	protein_coding	CDS	D4.event12507.4	Known-Coding	0.00981116	0.221145	0.792597	0.815376	853.39, 793.73, 770.06, 716.28, 706.11	633.53, 618.86, 612.35, 608.48, 607.21, 511.61	1052.12, 974.82, 913.56, 887.48, 880.48	789.91, 788.05, 775.42, 766.37, 756.08, 655.32
D4.event12507	3	-	185925626	185937825	D4.event12507.1,D4.event12507.2,D4.event12507.4	,185931852-185931577^185926734-185926601^,185926734-185926601^	,1-2^3-4^,3-4^	3	ENSG00000136527	TRA2B	protein_coding	CDS	D4.event12507.1	Known-Coding	0.00981116	1	0.052363	0.0605234	74, 57, 56, 52, 46	49, 46, 37, 36, 36, 33	1052.12, 974.82, 913.56, 887.48, 880.48	789.91, 788.05, 775.42, 766.37, 756.08, 655.32
ir.D3.event5038	4	-	4246202	4248212	D3.event5038.1,D3.event5038.2,D3.event5038.3	,4248106^4246343-,4247601^4246343-	,1^3-,2^3-	3	ENSG00000132406	TMEM128	protein_coding	CDS.DOM	D3.event5038.2	Known-Coding	0.0104711	0.00332456	0.708661	0.544433	36, 32, 21, 20, 16	33, 33, 33, 28, 28, 25	56.5, 56, 44, 40, 33	52.5, 45, 42, 40, 37.5, 37
ir.D3.event5038	4	-	4246202	4248212	D3.event5038.1,D3.event5038.2,D3.event5038.3	,4248106^4246343-,4247601^4246343-	,1^3-,2^3-	3	ENSG00000132406	TMEM128	protein_coding	CDS.DOM	D3.event5038.3	Known-Coding	0.0104711	0.00672091	0.161291	0.296378	17, 16, 13, 11, 11	13.5, 8, 6, 6, 4.5, 3	56.5, 56, 44, 40, 33	52.5, 45, 42, 40, 37.5, 37
ir.D3.event5038	4	-	4246202	4248212	D3.event5038.1,D3.event5038.2,D3.event5038.3	,4248106^4246343-,4247601^4246343-	,1^3-,2^3-	3	ENSG00000132406	TMEM128	protein_coding	CDS.DOM	D3.event5038.1	PTC_50_All	0.0104711	1	0.130048	0.159189	8, 8, 7.5, 7, 6	6, 6, 6, 6, 5, 4	56.5, 56, 44, 40, 33	52.5, 45, 42, 40, 37.5, 37
D4.event8614	19	+	49101471	49104634	D4.event8614.1,D4.event8614.2,D4.event8614.4	,49102114-49102173^,49102114-49103587^	,1-2^,1-3^	3	ENSG00000104852	SNRNP70	protein_coding	CDS.DOM	D4.event8614.1	Known-Coding	0.0106101	0.00349205	0.93498	0.894079	329, 301, 288, 287, 243	480, 461, 451, 423, 408, 403	378.86, 333.41, 318.7, 311.76, 277.63	509.18, 489.78, 477.98, 453.44, 444.98, 431.53
D4.event8614	19	+	49101471	49104634	D4.event8614.1,D4.event8614.2,D4.event8614.4	,49102114-49102173^,49102114-49103587^	,1-2^,1-3^	3	ENSG00000104852	SNRNP70	protein_coding	CDS.DOM	D4.event8614.4	Known-NMD	0.0106101	0.00899097	0.0218292	0.0468686	25.3, 20.49, 11.49, 11.31, 8.25	14.7, 14.49, 12.33, 6.93, 6.16, 6.08	378.86, 333.41, 318.7, 311.76, 277.63	509.18, 489.78, 477.98, 453.44, 444.98, 431.53
D4.event8614	19	+	49101471	49104634	D4.event8614.1,D4.event8614.2,D4.event8614.4	,49102114-49102173^,49102114-49103587^	,1-2^,1-3^	3	ENSG00000104852	SNRNP70	protein_coding	CDS.DOM	D4.event8614.2	Known-NMD	0.0106101	1	0.0431912	0.059052	24.56, 23.32, 22.45, 13.27, 11.92	24.08, 22.49, 22.45, 22.25, 18.11, 10.82	378.86, 333.41, 318.7, 311.76, 277.63	509.18, 489.78, 477.98, 453.44, 444.98, 431.53
D2.event12170	3	-	48692954	48695090	D2.event12170.1,D2.event12170.2	48694240-,48693179-	1-,2-	2	ENSG00000068745	IP6K2	protein_coding	CDS	D2.event12170.1	PTC_50_All	0.0106677	0	0.219837	0.151107	35, 31, 25, 23, 20	38, 34, 32, 30, 30, 23	203, 184.5, 183.5, 169, 147	158, 150.5, 146.5, 145, 138, 113
D2.event12170	3	-	48692954	48695090	D2.event12170.1,D2.event12170.2	48694240-,48693179-	1-,2-	2	ENSG00000068745	IP6K2	protein_coding	CDS	D2.event12170.2	Known-Coding	0.0106677	0	0.780163	0.848893	178, 153.5, 148.5, 146, 127	120, 118.5, 115, 112.5, 108, 90	203, 184.5, 183.5, 169, 147	158, 150.5, 146.5, 145, 138, 113
D2.event6548	16	-	4341368	4343207	D2.event6548.1,D2.event6548.2	4341672-,4341504-	1-,2-	2	ENSG00000217930	PAM16	protein_coding	CDS.DOM	D2.event6548.1	Known-NMD	0.010726	0	0.0682204	0.174872	11, 9, 7, 4, 4	6, 5, 4, 4, 2, 2	56.5, 43, 39, 36, 26	69, 59, 59, 53, 51.5, 50
D2.event6548	16	-	4341368	4343207	D2.event6548.1,D2.event6548.2	4341672-,4341504-	1-,2-	2	ENSG00000217930	PAM16	protein_coding	CDS.DOM	D2.event6548.2	Known-Coding	0.010726	0	0.93178	0.825128	45.5, 36, 35, 27, 22	64, 57, 55, 49.5, 49, 44	56.5, 43, 39, 36, 26	69, 59, 59, 53, 51.5, 50
D2.event9301	2	+	32193983	32197707	D2.event9301.1,D2.event9301.2	,32197344-32197392^	,1-2^	2	ENSG00000152683	SLC30A6	protein_coding	CDS.DOM	D2.event9301.2	Known-Coding	0.0112105	0	0.716749	0.552952	32.4, 32.24, 31.46, 22, 18.21	40.95, 35.47, 34.27, 33.23, 32.94, 30.98	67.46, 57.74, 49.4, 41, 31.71	52.95, 52.73, 46.98, 46.47, 45.77, 44.94
D2.event9301	2	+	32193983	32197707	D2.event9301.1,D2.event9301.2	,32197344-32197392^	,1-2^	2	ENSG00000152683	SLC30A6	protein_coding	CDS.DOM	D2.event9301.1	Known-Coding	0.0112105	0	0.283251	0.447048	36, 25.5, 19, 17, 13.5	19.5, 16, 12, 12, 11.5, 11	67.46, 57.74, 49.4, 41, 31.71	52.95, 52.73, 46.98, 46.47, 45.77, 44.94
D2.event6703	16	-	58534395	58537220	D2.event6703.1,D2.event6703.2	58536989^,58536968^	1^,2^	2	ENSG00000125107	CNOT1	protein_coding	CDS	D2.event6703.1	Known-Coding	0.0113711	0	0.83752	0.765916	159, 158, 158, 152, 133	175, 168, 165, 160, 153, 150	217, 202, 202, 194, 177	212, 210, 188, 185, 183, 182
D2.event6703	16	-	58534395	58537220	D2.event6703.1,D2.event6703.2	58536989^,58536968^	1^,2^	2	ENSG00000125107	CNOT1	protein_coding	CDS	D2.event6703.2	Known-Coding	0.0113711	0	0.16248	0.234084	59, 44, 44, 43, 42	42, 37, 35, 29, 28, 18	217, 202, 202, 194, 177	212, 210, 188, 185, 183, 182
D2.event6890	17	+	7016685	7017257	D2.event6890.1,D2.event6890.2	,7016910-7017014^	,1-2^	2	ENSG00000161939	RNASEK-C17orf49	protein_coding	CDS	D2.event6890.2	Known-Coding	0.0114784	0	0.841416	0.7487	76.49, 71.39, 69.5, 58.31, 49.82	125.09, 121.79, 108.47, 106.49, 105.66, 103.59	98.5, 94.49, 90.39, 81.31, 69.82	144.09, 142.79, 131.59, 126.66, 126.49, 125.47
D2.event6890	17	+	7016685	7017257	D2.event6890.1,D2.event6890.2	,7016910-7017014^	,1-2^	2	ENSG00000161939	RNASEK-C17orf49	protein_coding	CDS	D2.event6890.1	Known-Coding	0.0114784	0	0.158584	0.2513	29, 23, 20, 19, 18	28, 21, 21, 20, 19, 17	98.5, 94.49, 90.39, 81.31, 69.82	144.09, 142.79, 131.59, 126.66, 126.49, 125.47
ir.D4.event4722	3	+	186787803	186789125	D4.event4722.1,D4.event4722.2,D4.event4722.3,D4.event4722.4	186787882^,186787882^186788310-186788416^,186787882^186788310-186788420^,186788416^	1^,1^2-3^,1^2-4^,3^	4	ENSG00000156976	EIF4A2	protein_coding	CDS.DOM	D4.event4722.1	Known-Coding	0.0117871	0.0054369	0.405779	0.349393	202, 189, 184, 183.5, 164.5	321.5, 291.5, 286.5, 236, 233.5, 218	561.68, 545.89, 539.68, 504.16, 488.79	717.74, 713.99, 645.04, 620.42, 616.01, 591.82
ir.D4.event4722	3	+	186787803	186789125	D4.event4722.1,D4.event4722.2,D4.event4722.3,D4.event4722.4	186787882^,186787882^186788310-186788416^,186787882^186788310-186788420^,186788416^	1^,1^2-3^,1^2-4^,3^	4	ENSG00000156976	EIF4A2	protein_coding	CDS.DOM	D4.event4722.4	PTC_50_All	0.0117871	0.0668252	0.148291	0.183391	103.12, 99.32, 96.44, 95.8, 89.09	108.44, 103.9, 101.47, 97.48, 93.01, 73.94	561.68, 545.89, 539.68, 504.16, 488.79	717.74, 713.99, 645.04, 620.42, 616.01, 591.82
ir.D4.event4722	3	+	186787803	186789125	D4.event4722.1,D4.event4722.2,D4.event4722.3,D4.event4722.4	186787882^,186787882^186788310-186788416^,186787882^186788310-186788420^,186788416^	1^,1^2-3^,1^2-4^,3^	4	ENSG00000156976	EIF4A2	protein_coding	CDS.DOM	D4.event4722.3	PTC_50_All	0.0117871	1	0.236965	0.25102	143.29, 138.71, 136.52, 126.04, 118.29	175.69, 168.17, 159.43, 153.62, 147.83, 120.24	561.68, 545.89, 539.68, 504.16, 488.79	717.74, 713.99, 645.04, 620.42, 616.01, 591.82
ir.D4.event4722	3	+	186787803	186789125	D4.event4722.1,D4.event4722.2,D4.event4722.3,D4.event4722.4	186787882^,186787882^186788310-186788416^,186787882^186788310-186788420^,186788416^	1^,1^2-3^,1^2-4^,3^	4	ENSG00000156976	EIF4A2	protein_coding	CDS.DOM	D4.event4722.2	Known-NMD	0.0117871	1	0.208965	0.216196	123.84, 116.45, 115.06, 110.2, 105.03	149.48, 146.65, 141.24, 134.7, 131.59, 111.14	561.68, 545.89, 539.68, 504.16, 488.79	717.74, 713.99, 645.04, 620.42, 616.01, 591.82
ir.D3.event3417	19	+	58549737	58550284	D3.event3417.1,D3.event3417.2,D3.event3417.3	58549860^58549949-,58549860^58549949-58550035^58550147-,58550035^58550147-	1^2-,1^2-3^4-,3^4-	3	ENSG00000130726	TRIM28	protein_coding	CDS.DOM	D3.event3417.3	PTC_50_All	0.0122515	0.0555384	0.0418436	0.0581725	87.19, 77.72, 62.73, 55.57, 53.97	74.35, 55.43, 53.89, 43.91, 42.93, 42.83	1347.68, 1269.51, 1078.08, 1069.76, 1039.63	1337.94, 1318.6, 1285.16, 1254.71, 1232.97, 1061.85
ir.D3.event3417	19	+	58549737	58550284	D3.event3417.1,D3.event3417.2,D3.event3417.3	58549860^58549949-,58549860^58549949-58550035^58550147-,58550035^58550147-	1^2-,1^2-3^4-,3^4-	3	ENSG00000130726	TRIM28	protein_coding	CDS.DOM	D3.event3417.1	PTC_50_All	0.0122515	0.095893	0.0983445	0.0783317	116.93, 103.63, 81.54, 80.09, 72.39	133.39, 131.34, 124.59, 119.63, 117.21, 107.57	1347.68, 1269.51, 1078.08, 1069.76, 1039.63	1337.94, 1318.6, 1285.16, 1254.71, 1232.97, 1061.85
ir.D3.event3417	19	+	58549737	58550284	D3.event3417.1,D3.event3417.2,D3.event3417.3	58549860^58549949-,58549860^58549949-58550035^58550147-,58550035^58550147-	1^2-,1^2-3^4-,3^4-	3	ENSG00000130726	TRIM28	protein_coding	CDS.DOM	D3.event3417.2	Known-Coding	0.0122515	1	0.859812	0.863496	1180.4, 1098.61, 933.81, 910.56, 889.52	1133.37, 1130.2, 1116.66, 1092.25, 1072.83, 898.85	1347.68, 1269.51, 1078.08, 1069.76, 1039.63	1337.94, 1318.6, 1285.16, 1254.71, 1232.97, 1061.85
ir.D5.event6134	8	+	47966187	47969798	D5.event6134.1,D5.event6134.2,D5.event6134.3,D5.event6134.4,D5.event6134.5	47966275^47967365-47967485^,47966407^47967365-47967485^,47966407^47967365-47967485^47969279-47969401^,47966407^47967365-47969401^,47967485^	1^3-4^,2^3-4^,2^3-4^5-6^,2^3-6^,4^	5	ENSG00000104738	MCM4	protein_coding	CDS.DOM	D5.event6134.1	Known-Coding	0.0122515	0.0222942	0.0691644	0.0486348	40.06, 32.45, 32.37, 29.97, 21.68	70.93, 54.61, 52.8, 39.5, 38.94, 36.64	697.05, 677.18, 642.98, 618.19, 583	789.9, 757.82, 731.46, 689.93, 655.64, 609.35
ir.D5.event6134	8	+	47966187	47969798	D5.event6134.1,D5.event6134.2,D5.event6134.3,D5.event6134.4,D5.event6134.5	47966275^47967365-47967485^,47966407^47967365-47967485^,47966407^47967365-47967485^47969279-47969401^,47966407^47967365-47969401^,47967485^	1^3-4^,2^3-4^,2^3-4^5-6^,2^3-6^,4^	5	ENSG00000104738	MCM4	protein_coding	CDS.DOM	D5.event6134.3	Known-Coding	0.0122515	0.507774	0.0450817	0.0327492	29.91, 20.76, 20.15, 19.57, 15.01	44.38, 38.06, 36, 26.18, 26.15, 20.42	697.05, 677.18, 642.98, 618.19, 583	789.9, 757.82, 731.46, 689.93, 655.64, 609.35
ir.D5.event6134	8	+	47966187	47969798	D5.event6134.1,D5.event6134.2,D5.event6134.3,D5.event6134.4,D5.event6134.5	47966275^47967365-47967485^,47966407^47967365-47967485^,47966407^47967365-47967485^47969279-47969401^,47966407^47967365-47969401^,47967485^	1^3-4^,2^3-4^,2^3-4^5-6^,2^3-6^,4^	5	ENSG00000104738	MCM4	protein_coding	CDS.DOM	D5.event6134.2	Known-Coding	0.0122515	0.541263	0.749186	0.776022	545.15, 527.25, 486.05, 479, 460.44	578.17, 560.74, 544.48, 522.49, 503.24, 462.74	697.05, 677.18, 642.98, 618.19, 583	789.9, 757.82, 731.46, 689.93, 655.64, 609.35
ir.D5.event6134	8	+	47966187	47969798	D5.event6134.1,D5.event6134.2,D5.event6134.3,D5.event6134.4,D5.event6134.5	47966275^47967365-47967485^,47966407^47967365-47967485^,47966407^47967365-47967485^47969279-47969401^,47966407^47967365-47969401^,47967485^	1^3-4^,2^3-4^,2^3-4^5-6^,2^3-6^,4^	5	ENSG00000104738	MCM4	protein_coding	CDS.DOM	D5.event6134.5	PTC_50_All	0.0122515	1	0.0903029	0.0954792	68.57, 64.74, 61.2, 60.71, 51.91	73.27, 70.93, 63.59, 62.47, 55.97, 55.86	697.05, 677.18, 642.98, 618.19, 583	789.9, 757.82, 731.46, 689.93, 655.64, 609.35
ir.D5.event6134	8	+	47966187	47969798	D5.event6134.1,D5.event6134.2,D5.event6134.3,D5.event6134.4,D5.event6134.5	47966275^47967365-47967485^,47966407^47967365-47967485^,47966407^47967365-47967485^47969279-47969401^,47966407^47967365-47969401^,47967485^	1^3-4^,2^3-4^,2^3-4^5-6^,2^3-6^,4^	5	ENSG00000104738	MCM4	protein_coding	CDS.DOM	D5.event6134.4	PTC_50_All	0.0122515	1	0.0462653	0.0471147	36.62, 31.07, 29.91, 28.18, 25.67	37.43, 34.02, 33.87, 32.95, 29.45, 27.82	697.05, 677.18, 642.98, 618.19, 583	789.9, 757.82, 731.46, 689.93, 655.64, 609.35
ir.D4.event3885	2	-	38748579	38749705	D4.event3885.1,D4.event3885.2,D4.event3885.4	,38749529^38749346-38748898^38748653-,38749529^38748653-	,1^2-3^4-,1^4-	3	ENSG00000115875	SRSF7	protein_coding	CDS.DOM	D4.event3885.4	Known-Coding	0.0123748	0.00169042	0.898101	0.872092	882, 839, 788, 785.5, 771	881, 865, 862.5, 820.5, 765, 742	1018.26, 953.89, 907.92, 899.23, 882.14	984.27, 973.62, 942.28, 921.72, 860.52, 813.61
ir.D4.event3885	2	-	38748579	38749705	D4.event3885.1,D4.event3885.2,D4.event3885.4	,38749529^38749346-38748898^38748653-,38749529^38748653-	,1^2-3^4-,1^4-	3	ENSG00000115875	SRSF7	protein_coding	CDS.DOM	D4.event3885.1	Known-NMD	0.0123748	0.0145538	0.0760635	0.0956141	104.32, 89.2, 84.68, 84.4, 82.99	81.62, 80, 76.14, 69.37, 56.12, 54.91	1018.26, 953.89, 907.92, 899.23, 882.14	984.27, 973.62, 942.28, 921.72, 860.52, 813.61
ir.D4.event3885	2	-	38748579	38749705	D4.event3885.1,D4.event3885.2,D4.event3885.4	,38749529^38749346-38748898^38748653-,38749529^38748653-	,1^2-3^4-,1^4-	3	ENSG00000115875	SRSF7	protein_coding	CDS.DOM	D4.event3885.2	Known-NMD	0.0123748	1	0.025835	0.0322942	35.24, 31.94, 30.74, 26.74, 25.69	28.62, 27.13, 26.15, 23.66, 19.6, 16.7	1018.26, 953.89, 907.92, 899.23, 882.14	984.27, 973.62, 942.28, 921.72, 860.52, 813.61
D2.event1865	10	+	28590832	28608186	D2.event1865.1,D2.event1865.2	,28595733-28596041^	,1-2^	2	ENSG00000095787	WAC	protein_coding	CDS	D2.event1865.1	Known-Coding	0.0124579	0	0.286452	0.209846	52, 43, 42, 41, 41	77, 71, 64, 52, 49, 47	241.47, 224.25, 197.68, 195.87, 188.2	227.36, 223.62, 218.4, 212.63, 188, 184.93
D2.event1865	10	+	28590832	28608186	D2.event1865.1,D2.event1865.2	,28595733-28596041^	,1-2^	2	ENSG00000095787	WAC	protein_coding	CDS	D2.event1865.2	Known-Coding	0.0124579	0	0.713548	0.790154	189.47, 183.25, 155.68, 154.87, 145.2	175.36, 159.62, 147.4, 139, 137.93, 135.63	241.47, 224.25, 197.68, 195.87, 188.2	227.36, 223.62, 218.4, 212.63, 188, 184.93
D2.event15405	7	-	95411653	95412312	D2.event15405.1,D2.event15405.2	95411779-,95411743-	1-,2-	2	ENSG00000105854	PON2	protein_coding	CDS.DOM	D2.event15405.1	Known-Coding	0.0125548	0	0.811187	0.743629	152, 143, 125, 123.5, 123.5	290, 277, 256, 249, 215.5, 211.5	208, 183, 177, 170.5, 158.5	362, 337, 335, 299, 261.5, 254.5
D2.event15405	7	-	95411653	95412312	D2.event15405.1,D2.event15405.2	95411779-,95411743-	1-,2-	2	ENSG00000105854	PON2	protein_coding	CDS.DOM	D2.event15405.2	Known-Coding	0.0125548	0	0.188813	0.256371	56, 52, 47, 40, 35	79, 72, 60, 50, 46, 43	208, 183, 177, 170.5, 158.5	362, 337, 335, 299, 261.5, 254.5
D2.event4753	13	-	102766580	102768260	D2.event4753.1,D2.event4753.2	,102767478-102767273^	,1-2^	2	ENSG00000151287	TEX30	protein_coding	CDS.DOM	D2.event4753.1	Known-Coding	0.0126283	0	0.322048	0.181285	8, 7, 7, 6, 6	21, 19, 17, 16, 13, 13	50.66, 35.46, 35.29, 35.14, 31.3	56.4, 53.06, 52.3, 51.86, 47.28, 46.54
D2.event4753	13	-	102766580	102768260	D2.event4753.1,D2.event4753.2	,102767478-102767273^	,1-2^	2	ENSG00000151287	TEX30	protein_coding	CDS.DOM	D2.event4753.2	Known-Coding	0.0126283	0	0.677952	0.818715	42.66, 29.29, 28.46, 28.14, 25.3	40.4, 36.06, 34.28, 33.54, 32.86, 31.3	50.66, 35.46, 35.29, 35.14, 31.3	56.4, 53.06, 52.3, 51.86, 47.28, 46.54
D2.event6671	16	-	47083801	47109483	D2.event6671.1,D2.event6671.2	,47086339-47086226^	,1-2^	2	ENSG00000171208	NETO2	protein_coding	CDS.DOM	D2.event6671.2	Known-Coding	0.0126283	0	0.778213	0.842398	201.64, 182.73, 180.48, 161.97, 156.68	127.98, 127.72, 118.58, 118.45, 114.56, 94.04	232.64, 216.73, 213.48, 197.97, 187.68	165.98, 164.72, 158.45, 151.56, 147.58, 113.04
D2.event6671	16	-	47083801	47109483	D2.event6671.1,D2.event6671.2	,47086339-47086226^	,1-2^	2	ENSG00000171208	NETO2	protein_coding	CDS.DOM	D2.event6671.1	Known-Coding	0.0126283	0	0.221787	0.157602	36, 34, 33, 31, 31	40, 38, 37, 37, 29, 19	232.64, 216.73, 213.48, 197.97, 187.68	165.98, 164.72, 158.45, 151.56, 147.58, 113.04
D3.event12169	3	-	48694240	48695090	D3.event12169.1,D3.event12169.2,D3.event12169.3	,48694824-48694694^,48694525-48694459^	,1-2^,3-4^	3	ENSG00000068745	IP6K2	protein_coding	CDS	D3.event12169.1	Known-Coding	0.0126283	0	0.649838	0.800444	35, 31, 25, 23, 20	38, 34, 32, 30, 30, 23	42.58, 40.75, 32.41, 29.07, 27	66.84, 58.98, 55.2, 50.39, 45.67, 41.01
D3.event12169	3	-	48694240	48695090	D3.event12169.1,D3.event12169.2,D3.event12169.3	,48694824-48694694^,48694525-48694459^	,1-2^,3-4^	3	ENSG00000068745	IP6K2	protein_coding	CDS	D3.event12169.2	Known-Coding	0.0126283	0	0.350162	0.199556	9.75, 7.58, 7.07, 6, 3	21.91, 19.18, 15.56, 15.23, 15.2, 13.67	42.58, 40.75, 32.41, 29.07, 27	66.84, 58.98, 55.2, 50.39, 45.67, 41.01
D2.event12893	4	-	4246343	4248212	D2.event12893.1,D2.event12893.2	4248106^,4247601^	1^,2^	2	ENSG00000132406	TMEM128	protein_coding	CDS	D2.event12893.1	Known-Coding	0.0126283	0	0.815756	0.64478	36, 32, 21, 20, 16	33, 33, 33, 28, 28, 25	49, 49, 36, 32, 27	46.5, 41, 36, 34, 32.5, 31
D2.event12893	4	-	4246343	4248212	D2.event12893.1,D2.event12893.2	4248106^,4247601^	1^,2^	2	ENSG00000132406	TMEM128	protein_coding	CDS	D2.event12893.2	Known-Coding	0.0126283	0	0.184244	0.35522	17, 16, 13, 11, 11	13.5, 8, 6, 6, 4.5, 3	49, 49, 36, 32, 27	46.5, 41, 36, 34, 32.5, 31
ir.D4.event884	11	+	4126833	4132421	D4.event884.1,D4.event884.2,D4.event884.3,D4.event884.4	4127035-4127256^4129074-,4127035-4127256^4129074-4129150^4132286-,4127035-4129150^4132286-,4129074-4129150^4132286-	1-2^3-,1-2^3-4^5-,1-4^5-,3-4^5-	4	ENSG00000167325	RRM1	protein_coding	CDS.DOM	D4.event884.4	Known-Coding	0.0127573	0.0012981	0.0500039	0.0775787	55.48, 53.44, 46.9, 37.95, 37.59	50.6, 36.5, 32.62, 22, 21.79, 20.71	663.94, 606.96, 591.25, 580.98, 539.27	676.05, 657.32, 604.93, 600.15, 582.81, 534.78
ir.D4.event884	11	+	4126833	4132421	D4.event884.1,D4.event884.2,D4.event884.3,D4.event884.4	4127035-4127256^4129074-,4127035-4127256^4129074-4129150^4132286-,4127035-4129150^4132286-,4129074-4129150^4132286-	1-2^3-,1-2^3-4^5-,1-4^5-,3-4^5-	4	ENSG00000167325	RRM1	protein_coding	CDS.DOM	D4.event884.2	Known-Coding	0.0127573	1	0.664125	0.635679	429.06, 393.48, 387.75, 359.06, 327.45	440.35, 421.44, 405.09, 398.83, 394.92, 366.71	663.94, 606.96, 591.25, 580.98, 539.27	676.05, 657.32, 604.93, 600.15, 582.81, 534.78
ir.D4.event884	11	+	4126833	4132421	D4.event884.1,D4.event884.2,D4.event884.3,D4.event884.4	4127035-4127256^4129074-,4127035-4127256^4129074-4129150^4132286-,4127035-4129150^4132286-,4129074-4129150^4132286-	1-2^3-,1-2^3-4^5-,1-4^5-,3-4^5-	4	ENSG00000167325	RRM1	protein_coding	CDS.DOM	D4.event884.3	PTC_50_All	0.0127573	1	0.168836	0.171153	106.93, 103.12, 103.05, 102.1, 94.71	116.81, 109.3, 103.73, 102.52, 98.39, 86.1	663.94, 606.96, 591.25, 580.98, 539.27	676.05, 657.32, 604.93, 600.15, 582.81, 534.78
ir.D4.event884	11	+	4126833	4132421	D4.event884.1,D4.event884.2,D4.event884.3,D4.event884.4	4127035-4127256^4129074-,4127035-4127256^4129074-4129150^4132286-,4127035-4129150^4132286-,4129074-4129150^4132286-	1-2^3-,1-2^3-4^5-,1-4^5-,3-4^5-	4	ENSG00000167325	RRM1	protein_coding	CDS.DOM	D4.event884.1	PTC_50_All	0.0127573	1	0.117035	0.115589	77.3, 72.48, 68.09, 63.67, 62.79	86.27, 75.98, 74.88, 65.87, 63.37, 61.26	663.94, 606.96, 591.25, 580.98, 539.27	676.05, 657.32, 604.93, 600.15, 582.81, 534.78
ir.D2.event2006	14	-	24239643	24240875	D2.event2006.1,D2.event2006.2	,24240419^24240330-24240263^24240155-24240064^24239931-	,1^2-3^4-5^6-	2	ENSG00000092330	TINF2	protein_coding	CDS.DOM	D2.event2006.1	Known-Coding	0.0131721	0	0.733758	0.844266	52.94, 48.6, 44.99, 43.05, 35.81	64.46, 51.38, 49.23, 48.78, 47.76, 44.2	60.77, 56.92, 54.6, 52.72, 41.95	82.56, 70.04, 69.86, 69.01, 65.01, 60.28
ir.D2.event2006	14	-	24239643	24240875	D2.event2006.1,D2.event2006.2	,24240419^24240330-24240263^24240155-24240064^24239931-	,1^2-3^4-5^6-	2	ENSG00000092330	TINF2	protein_coding	CDS.DOM	D2.event2006.2	Known-Coding	0.0131721	0	0.266242	0.155734	11.55, 8.32, 7.83, 7.73, 6.14	20.63, 20.23, 18.66, 18.1, 17.25, 16.08	60.77, 56.92, 54.6, 52.72, 41.95	82.56, 70.04, 69.86, 69.01, 65.01, 60.28
ir.D2.event6074	7	-	108001558	108003160	D2.event6074.1,D2.event6074.2	108003111^108002971-,108002849^108001733-	1^2-,3^4-	2	ENSG00000091136	LAMB1	protein_coding	CDS.DOM	D2.event6074.1	PTC_50_All	0.0131721	0	0.386063	0.563205	35.1, 33.2, 32.53, 32.12, 26.83	19.67, 16.7, 14.73, 12.12, 10.77, 9.17	72.84, 62.43, 61.95, 46.24, 42.45	42.33, 40.57, 40.16, 32.81, 31.26, 28.06
ir.D2.event6074	7	-	108001558	108003160	D2.event6074.1,D2.event6074.2	108003111^108002971-,108002849^108001733-	1^2-,3^4-	2	ENSG00000091136	LAMB1	protein_coding	CDS.DOM	D2.event6074.2	Known-Coding	0.0131721	0	0.613937	0.436795	37.74, 29.9, 29.83, 15.62, 13.04	27.6, 23.87, 20.69, 20.49, 20.49, 18.89	72.84, 62.43, 61.95, 46.24, 42.45	42.33, 40.57, 40.16, 32.81, 31.26, 28.06
D2.event10137	2	-	70989816	70993696	D2.event10137.1,D2.event10137.2	,70991983-70991830^	,1-2^	2	ENSG00000144043	TEX261	protein_coding	CDS.DOM	D2.event10137.2	Known-Coding	0.0133391	0	0.880367	0.940309	123.67, 119.72, 115, 105.53, 104.24	119.13, 109.17, 94.99, 92.95, 91.01, 70.87	133.67, 124.72, 120, 116.53, 109.24	133.13, 123.17, 109.99, 104.95, 101.01, 83.87
D2.event10137	2	-	70989816	70993696	D2.event10137.1,D2.event10137.2	,70991983-70991830^	,1-2^	2	ENSG00000144043	TEX261	protein_coding	CDS.DOM	D2.event10137.1	Known-Coding	0.0133391	0	0.119633	0.0596915	11, 10, 5, 5, 5	15, 14, 14, 13, 12, 10	133.67, 124.72, 120, 116.53, 109.24	133.13, 123.17, 109.99, 104.95, 101.01, 83.87
D2.event13860	5	-	138328529	138330987	D2.event13860.1,D2.event13860.2	,138329647-138329553^	,1-2^	2	ENSG00000158402	CDC25C	protein_coding	CDS	D2.event13860.1	Known-Coding	0.0134116	0	0.25401	0.120567	8, 8, 5, 4, 3	28, 23, 19, 18, 17, 12	56.5, 54.37, 48.47, 39.64, 37.5	100.84, 93.85, 83.32, 67.36, 61.81, 58.89
D2.event13860	5	-	138328529	138330987	D2.event13860.1,D2.event13860.2	,138329647-138329553^	,1-2^	2	ENSG00000158402	CDC25C	protein_coding	CDS	D2.event13860.2	Known-Coding	0.0134116	0	0.74599	0.879433	53.5, 46.37, 40.47, 34.64, 33.5	81.85, 77.84, 55.32, 49.36, 42.81, 41.89	56.5, 54.37, 48.47, 39.64, 37.5	100.84, 93.85, 83.32, 67.36, 61.81, 58.89
D3.event4789	14	+	21087105	21088098	D3.event4789.1,D3.event4789.2,D3.event4789.3	21087320-21087463^21087968-,21087956-,21087968-	1-2^4-,3-,4-	3	ENSG00000165801	ARHGEF40	protein_coding	CDS	D3.event4789.3	Known-Coding	0.0136932	0.00192047	0.473817	0.608585	62, 42, 37, 35, 31	80, 72, 65, 61, 56, 49	92.92, 72.38, 61.38, 59.77, 53	153.94, 151.95, 138.45, 129.99, 120.92, 112.5
D3.event4789	14	+	21087105	21088098	D3.event4789.1,D3.event4789.2,D3.event4789.3	21087320-21087463^21087968-,21087956-,21087968-	1-2^4-,3-,4-	3	ENSG00000165801	ARHGEF40	protein_coding	CDS	D3.event4789.1	Known-Coding	0.0136932	0.00550468	0.455483	0.332132	25.38, 25.38, 24.92, 19.77, 17	78.94, 59.92, 58.45, 56.99, 56.95, 56.5	92.92, 72.38, 61.38, 59.77, 53	153.94, 151.95, 138.45, 129.99, 120.92, 112.5
D3.event4789	14	+	21087105	21088098	D3.event4789.1,D3.event4789.2,D3.event4789.3	21087320-21087463^21087968-,21087956-,21087968-	1-2^4-,3-,4-	3	ENSG00000165801	ARHGEF40	protein_coding	CDS	D3.event4789.2	In-Frame-Change	0.0136932	1	0.0707004	0.0592825	6, 5, 5, 3, 1	15, 12, 10, 8, 7, 5	92.92, 72.38, 61.38, 59.77, 53	153.94, 151.95, 138.45, 129.99, 120.92, 112.5
D2.event14092	6	+	30577913	30578202	D2.event14092.1,D2.event14092.2	30578073-,30578076-	1-,2-	2	ENSG00000204574	ABCF1	protein_coding	CDS.DOM	D2.event14092.1	Known-Coding	0.0138557	0	0.558701	0.638719	140, 129, 122.5, 113.5, 106.5	122.5, 117.5, 111, 104, 98.5, 98.5	213, 193.5, 193, 180, 177.5	215, 205, 198, 188, 182, 179
D2.event14092	6	+	30577913	30578202	D2.event14092.1,D2.event14092.2	30578073-,30578076-	1-,2-	2	ENSG00000204574	ABCF1	protein_coding	CDS.DOM	D2.event14092.2	Known-Coding	0.0138557	0	0.441299	0.361281	73.5, 73, 70.5, 64.5, 64	94, 94, 92.5, 83.5, 80.5, 70.5	213, 193.5, 193, 180, 177.5	215, 205, 198, 188, 182, 179
D3.event12043	3	-	15414162	15415772	D3.event12043.1,D3.event12043.2	,15415583-15415498^	,1-2^	2	ENSG00000206562	METTL6	protein_coding	CDS.DOM	D3.event12043.1	Known-Coding	0.0140001	0	0.680895	0.823345	43, 36, 34, 32, 31	27, 26, 26, 25, 23.5, 22	52.8, 46.95, 40.32, 37.2, 36.48	41.97, 40.07, 35.58, 34.96, 33.94, 33.04
D3.event12043	3	-	15414162	15415772	D3.event12043.1,D3.event12043.2	,15415583-15415498^	,1-2^	2	ENSG00000206562	METTL6	protein_coding	CDS.DOM	D3.event12043.2	Frameshift	0.0140001	0	0.319105	0.176655	10.95, 9.8, 6.32, 5.48, 5.2	14.97, 14.07, 12.96, 10.58, 9.54, 7.94	52.8, 46.95, 40.32, 37.2, 36.48	41.97, 40.07, 35.58, 34.96, 33.94, 33.04
D2.event1031	1	-	23796265	23796697	D2.event1031.1,D2.event1031.2	,23796586-23796509^	,1-2^	2	ENSG00000117308	GALE	protein_coding	CDS.DOM	D2.event1031.1	Known-Coding	0.0148187	0	0.0768821	0.179068	14, 10, 10, 8, 5	7, 6, 5, 4, 3, 2	61.05, 58.44, 55.62, 54.04, 34.68	66.33, 65.82, 61.52, 59.31, 54.62, 48.62
D2.event1031	1	-	23796265	23796697	D2.event1031.1,D2.event1031.2	,23796586-23796509^	,1-2^	2	ENSG00000117308	GALE	protein_coding	CDS.DOM	D2.event1031.2	Known-Coding	0.0148187	0	0.923118	0.820932	49.04, 48.44, 47.62, 47.05, 24.68	61.82, 59.33, 56.52, 53.31, 51.62, 46.62	61.05, 58.44, 55.62, 54.04, 34.68	66.33, 65.82, 61.52, 59.31, 54.62, 48.62
D3.event4895	14	+	55027471	55042952	D3.event4895.1,D3.event4895.2,D3.event4895.3	,55031804-55031991^,55031863-55031991^	,1-3^,2-3^	3	ENSG00000180008	SOCS4	protein_coding	UTR-5	D3.event4895.3	UTR-5	0.0148187	0.00269891	0.292835	0.443253	28.72, 26.98, 26.7, 22.85, 20	16.49, 14.97, 14.83, 14.07, 13.42, 10.77	65.72, 57.34, 55.27, 54.24, 50	54.71, 51.58, 49.16, 48.32, 43.39, 41.57
D3.event4895	14	+	55027471	55042952	D3.event4895.1,D3.event4895.2,D3.event4895.3	,55031804-55031991^,55031863-55031991^	,1-3^,2-3^	3	ENSG00000180008	SOCS4	protein_coding	UTR-5	D3.event4895.1	UTR-5	0.0148187	0.00903565	0.592248	0.449446	32, 26, 25, 23, 21	36, 33, 29, 26, 25.5, 21.5	65.72, 57.34, 55.27, 54.24, 50	54.71, 51.58, 49.16, 48.32, 43.39, 41.57
D3.event4895	14	+	55027471	55042952	D3.event4895.1,D3.event4895.2,D3.event4895.3	,55031804-55031991^,55031863-55031991^	,1-3^,2-3^	3	ENSG00000180008	SOCS4	protein_coding	UTR-5	D3.event4895.2	UTR-5	0.0148187	1	0.114918	0.107301	9.64, 5.39, 5.29, 5, 5	7.75, 6, 5.83, 5.39, 4.47, 3.74	65.72, 57.34, 55.27, 54.24, 50	54.71, 51.58, 49.16, 48.32, 43.39, 41.57
D3.event14998	7	+	99560695	99572245	D3.event14998.1,D3.event14998.2,D3.event14998.3	,99562368-99562494^99571688-99571792^,99571260-99571379^99571688-99571792^	,1-2^5-6^,3-4^5-6^	3	ENSG00000197343	ZNF655	protein_coding	CDS.DOM	D3.event14998.1	Known-Coding	0.0149063	0.00207274	0.564249	0.387112	15, 15, 15, 14, 12	38, 32, 30, 27, 24, 21	40.93, 39.88, 35.19, 34.85, 32.56	58.29, 55.17, 52.28, 50.58, 50.38, 38.13
D3.event14998	7	+	99560695	99572245	D3.event14998.1,D3.event14998.2,D3.event14998.3	,99562368-99562494^99571688-99571792^,99571260-99571379^99571688-99571792^	,1-2^5-6^,3-4^5-6^	3	ENSG00000197343	ZNF655	protein_coding	CDS.DOM	D3.event14998.3	Known-NMD	0.0149063	0.359992	0.201719	0.291475	11.7, 11.6, 11.08, 9.61, 9.47	13.1, 12.68, 10.34, 9.73, 8.77, 6.87	40.93, 39.88, 35.19, 34.85, 32.56	58.29, 55.17, 52.28, 50.58, 50.38, 38.13
D3.event14998	7	+	99560695	99572245	D3.event14998.1,D3.event14998.2,D3.event14998.3	,99562368-99562494^99571688-99571792^,99571260-99571379^99571688-99571792^	,1-2^5-6^,3-4^5-6^	3	ENSG00000197343	ZNF655	protein_coding	CDS.DOM	D3.event14998.2	In-Frame-Change	0.0149063	0.519645	0.234032	0.321412	14.28, 14.23, 11.77, 10.58, 8.09	15.44, 15.18, 10.7, 10.26, 9.95, 9.81	40.93, 39.88, 35.19, 34.85, 32.56	58.29, 55.17, 52.28, 50.58, 50.38, 38.13
D2.event12080	3	-	27376845	27383153	D2.event12080.1,D2.event12080.2	,27379356-27379249^	,1-2^	2	ENSG00000033867	SLC4A7	protein_coding	CDS	D2.event12080.1	Known-Coding	0.0155576	0	0.0473409	0.117344	18, 13, 10, 10, 6	5, 5, 4, 3, 2, 1	109.82, 106.46, 89.99, 89.84, 89.32	83.99, 72.64, 71.27, 70.82, 70.2, 61.5
D2.event12080	3	-	27376845	27383153	D2.event12080.1,D2.event12080.2	,27379356-27379249^	,1-2^	2	ENSG00000033867	SLC4A7	protein_coding	CDS	D2.event12080.2	Known-Coding	0.0155576	0	0.952659	0.882656	99.82, 88.46, 83.32, 79.84, 76.99	78.99, 69.2, 68.82, 68.27, 67.64, 57.5	109.82, 106.46, 89.99, 89.84, 89.32	83.99, 72.64, 71.27, 70.82, 70.2, 61.5
D2.event15083	7	+	122031559	122034282	D2.event15083.1,D2.event15083.2	,122034095-122034115^	,1-2^	2	ENSG00000106278	PTPRZ1	protein_coding	CDS.DOM	D2.event15083.1	Known-Coding	0.0155576	0	0.308683	0.45049	89, 86, 84, 79, 73	16, 14, 14, 9, 7, 6	196.38, 182.3, 181.99, 176.95, 176.38	47.98, 38.58, 35.98, 34.49, 29, 27.45
D2.event15083	7	+	122031559	122034282	D2.event15083.1,D2.event15083.2	,122034095-122034115^	,1-2^	2	ENSG00000106278	PTPRZ1	protein_coding	CDS.DOM	D2.event15083.2	Known-Coding	0.0155576	0	0.691317	0.54951	123.38, 103.3, 95.99, 92.95, 87.38	31.98, 29.58, 22, 21.98, 21.45, 20.49	196.38, 182.3, 181.99, 176.95, 176.38	47.98, 38.58, 35.98, 34.49, 29, 27.45
D2.event12223	3	-	52402779	52403138	D2.event12223.1,D2.event12223.2	52402940-,52402871-	1-,2-	2	ENSG00000163930	BAP1	protein_coding	CDS	D2.event12223.1	Known-Coding	0.0155644	0	0.0848047	0.149054	32, 23, 22, 21, 15	14, 13, 12, 10, 7, 6	171, 155, 153, 147, 132	141, 141, 128, 118, 117, 90
D2.event12223	3	-	52402779	52403138	D2.event12223.1,D2.event12223.2	52402940-,52402871-	1-,2-	2	ENSG00000163930	BAP1	protein_coding	CDS	D2.event12223.2	Known-Coding	0.0155644	0	0.915195	0.850946	139, 133, 132, 132, 109	134, 129, 115, 107, 104, 84	171, 155, 153, 147, 132	141, 141, 128, 118, 117, 90
D2.event7411	17	-	9505162	9568371	D2.event7411.1,D2.event7411.2	,9557528-9557434^9545282-9545172^	,1-2^3-4^	2	ENSG00000170310	STX8	protein_coding	CDS.DOM	D2.event7411.1	Known-Coding	0.0155973	0	0.101013	0.0429557	7, 4.5, 4, 3, 3	12, 7, 7, 7, 7, 6	112.15, 108.83, 103.5, 93.08, 86.73	89.87, 78.75, 78.21, 74.63, 70.28, 64.96
D2.event7411	17	-	9505162	9568371	D2.event7411.1,D2.event7411.2	,9557528-9557434^9545282-9545172^	,1-2^3-4^	2	ENSG00000170310	STX8	protein_coding	CDS.DOM	D2.event7411.2	Known-Coding	0.0155973	0	0.898987	0.957044	107.65, 101.83, 99.5, 90.08, 83.73	82.87, 71.75, 68.63, 66.21, 63.28, 57.96	112.15, 108.83, 103.5, 93.08, 86.73	89.87, 78.75, 78.21, 74.63, 70.28, 64.96
ir.D3.event4811	3	-	52402779	52403298	D3.event4811.1,D3.event4811.2,D3.event4811.3	,52403138^52402940-,52403138^52402871-	,1^2-,1^3-	3	ENSG00000163930	BAP1	protein_coding	CDS	D3.event4811.2	Known-Coding	0.0160168	0	0.0847904	0.149048	32, 23, 22, 21, 15	14, 13, 12, 10, 7, 6	175, 159, 154, 150, 134	149, 145, 131, 122, 118, 91
ir.D3.event4811	3	-	52402779	52403298	D3.event4811.1,D3.event4811.2,D3.event4811.3	,52403138^52402940-,52403138^52402871-	,1^2-,1^3-	3	ENSG00000163930	BAP1	protein_coding	CDS	D3.event4811.3	Known-Coding	0.0160168	0	0.91521	0.850952	139, 133, 132, 132, 109	134, 129, 115, 107, 104, 84	175, 159, 154, 150, 134	149, 145, 131, 122, 118, 91
D3.event10978	21	+	37156906	37159699	D3.event10978.1,D3.event10978.2,D3.event10978.3	,37157161-37157214^,37158131-37158203^	,1-2^,3-4^	3	ENSG00000182670	TTC3	protein_coding	CDS	D3.event10978.1	Known-Coding	0.016248	0	0.890135	0.841687	193, 192, 181, 178, 175	227.5, 225, 202, 196, 193, 170	230.18, 227.81, 225.4, 211.7, 211.5	260.81, 252.1, 232.84, 224.03, 215.92, 196.18
D3.event10978	21	+	37156906	37159699	D3.event10978.1,D3.event10978.2,D3.event10978.3	,37157161-37157214^,37158131-37158203^	,1-2^,3-4^	3	ENSG00000182670	TTC3	protein_coding	CDS	D3.event10978.2	Known-Coding	0.016248	0	0.109865	0.158313	41.95, 33.87, 33.44, 32.98, 30.5	28.84, 28.39, 25.38, 25.1, 24.45, 17.44	230.18, 227.81, 225.4, 211.7, 211.5	260.81, 252.1, 232.84, 224.03, 215.92, 196.18
D2.event14217	6	+	50818726	50823407	D2.event14217.1,D2.event14217.2	50818972^,50822160^	1^,2^	2	ENSG00000008196	TFAP2B	protein_coding	CDS	D2.event14217.1	Known-Coding	0.0167174	0	0.802637	0.701625	112, 102, 86, 65, 64	84, 84, 77, 75, 57, 54	159, 138, 120, 99, 94	107, 102, 91, 87, 83, 67
D2.event14217	6	+	50818726	50823407	D2.event14217.1,D2.event14217.2	50818972^,50822160^	1^,2^	2	ENSG00000008196	TFAP2B	protein_coding	CDS	D2.event14217.2	PTC_50_All	0.0167174	0	0.197363	0.298375	47, 36, 34, 34, 30	26, 23, 18, 14, 13, 12	159, 138, 120, 99, 94	107, 102, 91, 87, 83, 67
D2.event5143	14	-	21429335	21431858	D2.event5143.1,D2.event5143.2	21431811^,21430801^	1^,2^	2	ENSG00000100888	CHD8	protein_coding	CDS	D2.event5143.1	Known-Coding	0.0170807	0	0.138004	0.0734523	11, 10, 8, 7, 6	18.5, 15.33, 15, 14.33, 10.33, 10	133.5, 123, 115, 103, 101.5	110.33, 107.83, 101, 100.66, 95, 91.5
D2.event5143	14	-	21429335	21431858	D2.event5143.1,D2.event5143.2	21431811^,21430801^	1^,2^	2	ENSG00000100888	CHD8	protein_coding	CDS	D2.event5143.2	Known-Coding	0.0170807	0	0.861996	0.926548	125.5, 113, 104, 96, 95.5	95, 93.5, 91, 90.33, 80, 73	133.5, 123, 115, 103, 101.5	110.33, 107.83, 101, 100.66, 95, 91.5
ir.D5.event4904	3	-	156543269	156553781	D5.event4904.1,D5.event4904.2,D5.event4904.3,D5.event4904.4,D5.event4904.5	156553655^156549003-156548905^156544439-156544308^,156553655^156549003-156548905^156544439-156544294^,156553655^156549003-156548866^156544439-156544308^,156553655^156549003-156544308^,156548905^156544439-156544308^	1^2-3^5-6^,1^2-3^5-7^,1^2-4^5-6^,1^2-6^,3^5-6^	5	ENSG00000114850	SSR3	protein_coding	CDS.DOM	D5.event4904.3	Known-Coding	0.0174283	0.0283216	0.121724	0.0965488	71.69, 57.4, 55.36, 53.64, 52.16	133.45, 115.17, 111.68, 105.81, 87.18, 82.74	699.04, 655.73, 563.58, 562.95, 525.65	999.23, 940.89, 873.21, 857.4, 806.31, 746.66
ir.D5.event4904	3	-	156543269	156553781	D5.event4904.1,D5.event4904.2,D5.event4904.3,D5.event4904.4,D5.event4904.5	156553655^156549003-156548905^156544439-156544308^,156553655^156549003-156548905^156544439-156544294^,156553655^156549003-156548866^156544439-156544308^,156553655^156549003-156544308^,156548905^156544439-156544308^	1^2-3^5-6^,1^2-3^5-7^,1^2-4^5-6^,1^2-6^,3^5-6^	5	ENSG00000114850	SSR3	protein_coding	CDS.DOM	D5.event4904.4	PTC_50_All	0.0174283	0.537466	0.142682	0.16407	112.38, 111.58, 91.11, 90.33, 87.88	145.1, 133.45, 123.75, 117.57, 115.63, 109.74	699.04, 655.73, 563.58, 562.95, 525.65	999.23, 940.89, 873.21, 857.4, 806.31, 746.66
ir.D5.event4904	3	-	156543269	156553781	D5.event4904.1,D5.event4904.2,D5.event4904.3,D5.event4904.4,D5.event4904.5	156553655^156549003-156548905^156544439-156544308^,156553655^156549003-156548905^156544439-156544294^,156553655^156549003-156548866^156544439-156544308^,156553655^156549003-156544308^,156548905^156544439-156544308^	1^2-3^5-6^,1^2-3^5-7^,1^2-4^5-6^,1^2-6^,3^5-6^	5	ENSG00000114850	SSR3	protein_coding	CDS.DOM	D5.event4904.5	PTC_50_All	0.0174283	1	0.123752	0.135836	94.06, 90.41, 75.16, 74.45, 74.29	122.47, 120.52, 107.32, 103.56, 100.73, 91.76	699.04, 655.73, 563.58, 562.95, 525.65	999.23, 940.89, 873.21, 857.4, 806.31, 746.66
ir.D5.event4904	3	-	156543269	156553781	D5.event4904.1,D5.event4904.2,D5.event4904.3,D5.event4904.4,D5.event4904.5	156553655^156549003-156548905^156544439-156544308^,156553655^156549003-156548905^156544439-156544294^,156553655^156549003-156548866^156544439-156544308^,156553655^156549003-156544308^,156548905^156544439-156544308^	1^2-3^5-6^,1^2-3^5-7^,1^2-4^5-6^,1^2-6^,3^5-6^	5	ENSG00000114850	SSR3	protein_coding	CDS.DOM	D5.event4904.2	Known-Coding	0.0174283	1	0.1078	0.100674	82.67, 60.77, 59.98, 59.52, 39.91	110.49, 104.01, 93.79, 91.07, 83.6, 80.1	699.04, 655.73, 563.58, 562.95, 525.65	999.23, 940.89, 873.21, 857.4, 806.31, 746.66
ir.D5.event4904	3	-	156543269	156553781	D5.event4904.1,D5.event4904.2,D5.event4904.3,D5.event4904.4,D5.event4904.5	156553655^156549003-156548905^156544439-156544308^,156553655^156549003-156548905^156544439-156544294^,156553655^156549003-156548866^156544439-156544308^,156553655^156549003-156544308^,156548905^156544439-156544308^	1^2-3^5-6^,1^2-3^5-7^,1^2-4^5-6^,1^2-6^,3^5-6^	5	ENSG00000114850	SSR3	protein_coding	CDS.DOM	D5.event4904.1	Known-Coding	0.0174283	1	0.504042	0.502871	357.09, 341.26, 279.93, 268.05, 265.87	507.95, 467.92, 436.39, 426.73, 411.7, 382.32	699.04, 655.73, 563.58, 562.95, 525.65	999.23, 940.89, 873.21, 857.4, 806.31, 746.66
ir.D3.event3446	19	-	3982246	3983291	D3.event3446.1,D3.event3446.2,D3.event3446.3	3983110^3983018-,3983110^3983018-3982807^3982424-,3982807^3982424-	1^2-,1^2-3^4-,3^4-	3	ENSG00000167658	EEF2	protein_coding	CDS.DOM	D3.event3446.2	Known-Coding	0.0180655	0.00612641	0.893002	0.918257	2341.59, 2117.93, 1877.31, 1806.22, 1717.45	2207.04, 2084.63, 2068.8, 2051.91, 2020.31, 1943.79	2571.25, 2284.59, 2051.06, 1959.74, 1867.52	2500.21, 2355.63, 2314.87, 2291.48, 2276.86, 2132.43
ir.D3.event3446	19	-	3982246	3983291	D3.event3446.1,D3.event3446.2,D3.event3446.3	3983110^3983018-,3983110^3983018-3982807^3982424-,3982807^3982424-	1^2-,1^2-3^4-,3^4-	3	ENSG00000167658	EEF2	protein_coding	CDS.DOM	D3.event3446.3	PTC_50_All	0.0180655	0.0367178	0.0349407	0.0223577	86.61, 41.42, 39.57, 38.44, 37.31	118.61, 100.37, 81.57, 80.05, 71.12, 41.1	2571.25, 2284.59, 2051.06, 1959.74, 1867.52	2500.21, 2355.63, 2314.87, 2291.48, 2276.86, 2132.43
ir.D3.event3446	19	-	3982246	3983291	D3.event3446.1,D3.event3446.2,D3.event3446.3	3983110^3983018-,3983110^3983018-3982807^3982424-,3982807^3982424-	1^2-,1^2-3^4-,3^4-	3	ENSG00000167658	EEF2	protein_coding	CDS.DOM	D3.event3446.1	PTC_50_All	0.0180655	0.65832	0.072057	0.0593857	143.05, 134.18, 125.24, 115.08, 112.76	199.88, 181.39, 174.56, 170.8, 166.96, 108.59	2571.25, 2284.59, 2051.06, 1959.74, 1867.52	2500.21, 2355.63, 2314.87, 2291.48, 2276.86, 2132.43
ir.D4.event4026	2	-	178444422	178447586	D4.event4026.1,D4.event4026.2,D4.event4026.3,D4.event4026.4	,178447505^178445535-178445426^178444500-,178447505^178444500-,178447456^178444500-	,1^3-4^5-,1^5-,2^5-	4	ENSG00000180228	PRKRA	protein_coding	CDS.DOM	D4.event4026.2	Known-Coding	0.0180655	0.00754852	0.0490586	0.0830684	22.45, 20.49, 19.75, 17.03, 12.96	15.49, 14.25, 13.27, 12.33, 9.49, 8.72	255.57, 228.69, 219.74, 218.48, 208.23	283.74, 270.45, 259.1, 252.79, 237.45, 222.71
ir.D4.event4026	2	-	178444422	178447586	D4.event4026.1,D4.event4026.2,D4.event4026.3,D4.event4026.4	,178447505^178445535-178445426^178444500-,178447505^178444500-,178447456^178444500-	,1^3-4^5-,1^5-,2^5-	4	ENSG00000180228	PRKRA	protein_coding	CDS.DOM	D4.event4026.3	Known-Coding	0.0180655	0.00872677	0.900455	0.855956	219, 195, 190, 183, 168	252, 243, 227, 227, 206, 195	255.57, 228.69, 219.74, 218.48, 208.23	283.74, 270.45, 259.1, 252.79, 237.45, 222.71
ir.D4.event4026	2	-	178444422	178447586	D4.event4026.1,D4.event4026.2,D4.event4026.3,D4.event4026.4	,178447505^178445535-178445426^178444500-,178447505^178444500-,178447456^178444500-	,1^3-4^5-,1^5-,2^5-	4	ENSG00000180228	PRKRA	protein_coding	CDS.DOM	D4.event4026.1	PTC_50_All	0.0180655	1	0.0504861	0.0609752	14.66, 13.78, 13.78, 13.08, 12.73	15.49, 14.07, 12.96, 11.96, 11.83, 9.38	255.57, 228.69, 219.74, 218.48, 208.23	283.74, 270.45, 259.1, 252.79, 237.45, 222.71
D2.event7392	17	-	7856843	7857198	D2.event7392.1,D2.event7392.2	7857015^,7856985^	1^,2^	2	ENSG00000183011	LSMD1	protein_coding	CDS.DOM	D2.event7392.1	Known-Coding	0.0183235	0	0.900436	0.935865	265, 240, 230, 206, 199.5	338, 319, 297, 290, 286, 277	284, 256, 249, 219, 210.5	368, 357, 336, 320, 314, 311.5
D2.event7392	17	-	7856843	7857198	D2.event7392.1,D2.event7392.2	7857015^,7856985^	1^,2^	2	ENSG00000183011	LSMD1	protein_coding	CDS.DOM	D2.event7392.2	Known-Coding	0.0183235	0	0.0995636	0.0641355	19, 19, 16, 13, 11	39, 38, 34.5, 30, 30, 28	284, 256, 249, 219, 210.5	368, 357, 336, 320, 314, 311.5
D2.event694	1	+	171584419	171587003	D2.event694.1,D2.event694.2	171584526^,171584541^	1^,2^	2	ENSG00000117523	PRRC2C	protein_coding	CDS	D2.event694.1	Known-Coding	0.0187959	0	0.840387	0.762212	121, 120, 113, 112, 83	114, 112, 95, 88, 86, 86	156, 155, 153, 137, 119	136, 134, 115, 104, 102, 100
D2.event694	1	+	171584419	171587003	D2.event694.1,D2.event694.2	171584526^,171584541^	1^,2^	2	ENSG00000117523	PRRC2C	protein_coding	CDS	D2.event694.2	Known-Coding	0.0187959	0	0.159613	0.237788	41, 36, 35, 35, 24	24, 20, 20, 16, 16, 14	156, 155, 153, 137, 119	136, 134, 115, 104, 102, 100
ir.D3.event2643	17	+	7575258	7577165	D3.event2643.1,D3.event2643.2,D3.event2643.3	7576524-,7576524-7576692^7577056-,7576530-7576692^7577056-	1-,1-3^4-,2-3^4-	3	ENSG00000161960	EIF4A1	protein_coding	CDS.DOM	D3.event2643.1	PTC_50_All	0.0191002	0.00394281	0.0804452	0.0678038	308.88, 289.4, 285.12, 284.97, 239.55	308.13, 306.01, 297.43, 291.29, 272.61, 265.13	4586.06, 4303.69, 4166.57, 3934.61, 3793.22	3907.75, 3770.06, 3658.4, 3618.88, 3393.97, 3312.59
ir.D3.event2643	17	+	7575258	7577165	D3.event2643.1,D3.event2643.2,D3.event2643.3	7576524-,7576524-7576692^7577056-,7576530-7576692^7577056-	1-,1-3^4-,2-3^4-	3	ENSG00000161960	EIF4A1	protein_coding	CDS.DOM	D3.event2643.2	Known-Coding	0.0191002	0.46145	0.867227	0.876911	4039.7, 3779.42, 3605.19, 3482.16, 3319.83	3404, 3284.98, 3163.59, 3155.64, 2924.16, 2857.12	4586.06, 4303.69, 4166.57, 3934.61, 3793.22	3907.75, 3770.06, 3658.4, 3618.88, 3393.97, 3312.59
ir.D3.event2643	17	+	7575258	7577165	D3.event2643.1,D3.event2643.2,D3.event2643.3	7576524-,7576524-7576692^7577056-,7576530-7576692^7577056-	1-,1-3^4-,2-3^4-	3	ENSG00000161960	EIF4A1	protein_coding	CDS.DOM	D3.event2643.3	Known-Coding	0.0191002	1	0.0523274	0.0552851	261.39, 252.5, 239.15, 212.9, 183.99	206.32, 197.2, 190.34, 188.8, 176.95, 171.95	4586.06, 4303.69, 4166.57, 3934.61, 3793.22	3907.75, 3770.06, 3658.4, 3618.88, 3393.97, 3312.59
ir.D2.event4968	4	+	41257115	41257737	D2.event4968.1,D2.event4968.2	,41257126^41257609-	,1^2-	2	ENSG00000154277	UCHL1	protein_coding	CDS.DOM	D2.event4968.2	Known-Coding	0.0191002	0	0.891245	0.936123	247, 180, 166, 141, 140	270, 263, 250, 239, 232, 209	266, 193, 182, 148, 145	306, 296, 270, 268, 259, 242
ir.D2.event4968	4	+	41257115	41257737	D2.event4968.1,D2.event4968.2	,41257126^41257609-	,1^2-	2	ENSG00000154277	UCHL1	protein_coding	CDS.DOM	D2.event4968.1	Frameshift_PTC_50_Any	0.0191002	0	0.108755	0.0638769	19, 16, 13, 7, 5	36, 33, 33, 29, 27, 20	266, 193, 182, 148, 145	306, 296, 270, 268, 259, 242
ir.D2.event2043	14	-	74286014	74286816	D2.event2043.1,D2.event2043.2	,74286701^74286529-	,1^2-	2	ENSG00000119688	ABCD4	protein_coding	CDS.DOM	D2.event2043.1	Frameshift	0.0191937	0	0.456897	0.611607	31, 29, 28, 26, 23	23, 21, 17, 16, 15, 14	55.5, 45, 44.5, 42, 37	54, 46, 39, 33, 32, 28
ir.D2.event2043	14	-	74286014	74286816	D2.event2043.1,D2.event2043.2	,74286701^74286529-	,1^2-	2	ENSG00000119688	ABCD4	protein_coding	CDS.DOM	D2.event2043.2	Known-Coding	0.0191937	0	0.543103	0.388393	24.5, 19, 17, 15.5, 11	31, 25, 22, 18, 16, 14	55.5, 45, 44.5, 42, 37	54, 46, 39, 33, 32, 28
D2.event4348	12	-	112048443	112053558	D2.event4348.1,D2.event4348.2	,112049611-112049483^	,1-2^	2	ENSG00000111300	NAA25	protein_coding	CDS	D2.event4348.1	Known-Coding	0.0193035	0	0.925816	0.844413	63, 61, 52, 51, 50	71, 71, 68, 68, 67, 42	71.49, 68.75, 63.73, 63.08, 60.83	75.47, 75.24, 74.32, 74.07, 71.87, 46.69
D2.event4348	12	-	112048443	112053558	D2.event4348.1,D2.event4348.2	,112049611-112049483^	,1-2^	2	ENSG00000111300	NAA25	protein_coding	CDS	D2.event4348.2	In-Frame-Change	0.0193035	0	0.0741844	0.155587	13.08, 12.73, 8.83, 8.49, 7.75	7.07, 6.32, 4.69, 4.47, 4.24, 3.87	71.49, 68.75, 63.73, 63.08, 60.83	75.47, 75.24, 74.32, 74.07, 71.87, 46.69
ir.D3.event4918	3	-	171138191	171140509	D3.event4918.1,D3.event4918.2,D3.event4918.3	,171140399^171139556-171139470^171138379-,171140399^171138379-	,1^2-3^4-,1^4-	3	ENSG00000154310	TNIK	protein_coding	CDS	D3.event4918.3	Known-Coding	0.0205614	0.00328877	0.897877	0.807725	128.5, 124.5, 113, 109, 108	50.5, 50.5, 50, 43, 43, 42.5	155.67, 153.95, 139.9, 136.36, 135.9	62.22, 53.45, 52.72, 48, 47.66, 47.24
ir.D3.event4918	3	-	171138191	171140509	D3.event4918.1,D3.event4918.2,D3.event4918.3	,171140399^171139556-171139470^171138379-,171140399^171138379-	,1^2-3^4-,1^4-	3	ENSG00000154310	TNIK	protein_coding	CDS	D3.event4918.2	Known-Coding	0.0205614	0.0224186	0.0732107	0.141013	21.45, 20.9, 20.9, 19.36, 19.17	10.72, 3.16, 3, 2.45, 2.24, 1.22	155.67, 153.95, 139.9, 136.36, 135.9	62.22, 53.45, 52.72, 48, 47.66, 47.24
ir.D3.event4918	3	-	171138191	171140509	D3.event4918.1,D3.event4918.2,D3.event4918.3	,171140399^171139556-171139470^171138379-,171140399^171138379-	,1^2-3^4-,1^4-	3	ENSG00000154310	TNIK	protein_coding	CDS	D3.event4918.1	PTC_50_All	0.0205614	1	0.028912	0.0512625	8, 8, 8, 7, 6	2, 2, 2, 1, 1, 1	155.67, 153.95, 139.9, 136.36, 135.9	62.22, 53.45, 52.72, 48, 47.66, 47.24
ir.D5.event619	1	-	185301434	185307014	D5.event619.1,D5.event619.2,D5.event619.3,D5.event619.4,D5.event619.5	185306625-,185306625-185306485^185305643-,185306625-185306485^185305643-185305536^185301563-,185306625-185305536^185301563-,185305643-185305536^185301563-	1-,1-2^3-,1-2^3-4^5-,1-4^5-,3-4^5-	5	ENSG00000116679	IVNS1ABP	protein_coding	CDS.DOM	D5.event619.5	Known-Coding	0.0205875	0.00131674	0.524868	0.462957	197.91, 193.06, 186.26, 180.65, 178.91	246.54, 244.47, 240.86, 227.44, 227.35, 209.7	431.41, 430.57, 396.29, 383.89, 381.33	499.23, 465.14, 443.18, 424.12, 422.28, 406.45
ir.D5.event619	1	-	185301434	185307014	D5.event619.1,D5.event619.2,D5.event619.3,D5.event619.4,D5.event619.5	185306625-,185306625-185306485^185305643-,185306625-185306485^185305643-185305536^185301563-,185306625-185305536^185301563-,185305643-185305536^185301563-	1-,1-2^3-,1-2^3-4^5-,1-4^5-,3-4^5-	5	ENSG00000116679	IVNS1ABP	protein_coding	CDS.DOM	D5.event619.4	PTC_50_All	0.0205875	0.916843	0.186945	0.214693	94.45, 92.47, 87.5, 83.26, 76.75	98.11, 86.23, 84.58, 78.68, 75.43, 74.32	431.41, 430.57, 396.29, 383.89, 381.33	499.23, 465.14, 443.18, 424.12, 422.28, 406.45
ir.D5.event619	1	-	185301434	185307014	D5.event619.1,D5.event619.2,D5.event619.3,D5.event619.4,D5.event619.5	185306625-,185306625-185306485^185305643-,185306625-185306485^185305643-185305536^185301563-,185306625-185305536^185301563-,185305643-185305536^185301563-	1-,1-2^3-,1-2^3-4^5-,1-4^5-,3-4^5-	5	ENSG00000116679	IVNS1ABP	protein_coding	CDS.DOM	D5.event619.1	PTC_50_All	0.0205875	1	0.0966096	0.114935	51.38, 48.32, 47.58, 46.08, 39.21	50.83, 44.81, 44.28, 41.46, 39.03, 36.61	431.41, 430.57, 396.29, 383.89, 381.33	499.23, 465.14, 443.18, 424.12, 422.28, 406.45
ir.D5.event619	1	-	185301434	185307014	D5.event619.1,D5.event619.2,D5.event619.3,D5.event619.4,D5.event619.5	185306625-,185306625-185306485^185305643-,185306625-185306485^185305643-185305536^185301563-,185306625-185305536^185301563-,185305643-185305536^185301563-	1-,1-2^3-,1-2^3-4^5-,1-4^5-,3-4^5-	5	ENSG00000116679	IVNS1ABP	protein_coding	CDS.DOM	D5.event619.2	PTC_50_All	0.0205875	1	0.0652947	0.0722268	32.35, 31.72, 28.38, 26.95, 26.75	35.41, 30.65, 29.85, 28.09, 26.44, 23.27	431.41, 430.57, 396.29, 383.89, 381.33	499.23, 465.14, 443.18, 424.12, 422.28, 406.45
ir.D5.event619	1	-	185301434	185307014	D5.event619.1,D5.event619.2,D5.event619.3,D5.event619.4,D5.event619.5	185306625-,185306625-185306485^185305643-,185306625-185306485^185305643-185305536^185301563-,185306625-185305536^185301563-,185305643-185305536^185301563-	1-,1-2^3-,1-2^3-4^5-,1-4^5-,3-4^5-	5	ENSG00000116679	IVNS1ABP	protein_coding	CDS.DOM	D5.event619.3	Known-Coding	0.0205875	1	0.126282	0.135187	63.23, 57.09, 52.36, 52.18, 48.69	68.34, 58.98, 57.03, 53.49, 50.17, 47.95	431.41, 430.57, 396.29, 383.89, 381.33	499.23, 465.14, 443.18, 424.12, 422.28, 406.45
ir.D4.event1922	14	+	73099380	73103192	D4.event1922.2,D4.event1922.3,D4.event1922.4	73099433^73099667-73099750^73100301-73100362^,73099433^73099667-73099750^,73099750^	1^2-3^,1^2-3^4-5^,3^	3	ENSG00000119707	RBM25	protein_coding	CDS	D4.event1922.2	In-Frame-Change	0.0209067	0.0056769	0.127251	0.0739833	15.62, 15.01, 14.49, 14.04, 11.31	32.85, 22.37, 22.1, 19.02, 18.6, 16.26	201.21, 200.46, 188.76, 184.72, 184.18	205.24, 183.05, 178.35, 162.71, 156.11, 145.24
ir.D4.event1922	14	+	73099380	73103192	D4.event1922.2,D4.event1922.3,D4.event1922.4	73099433^73099667-73099750^73100301-73100362^,73099433^73099667-73099750^,73099750^	1^2-3^,1^2-3^4-5^,3^	3	ENSG00000119707	RBM25	protein_coding	CDS	D4.event1922.3	Known-Coding	0.0209067	1	0.78123	0.81323	169.18, 165.32, 153.38, 150.2, 142.27	156.61, 143.29, 141.35, 132.45, 123.87, 108.07	201.21, 200.46, 188.76, 184.72, 184.18	205.24, 183.05, 178.35, 162.71, 156.11, 145.24
ir.D4.event1922	14	+	73099380	73103192	D4.event1922.2,D4.event1922.3,D4.event1922.4	73099433^73099667-73099750^73100301-73100362^,73099433^73099667-73099750^,73099750^	1^2-3^,1^2-3^4-5^,3^	3	ENSG00000119707	RBM25	protein_coding	CDS	D4.event1922.4	PTC_50_All	0.0209067	1	0.0915193	0.112787	32.45, 24.58, 18.97, 16.79, 15.72	20.74, 15.78, 14.9, 14.8, 14, 13.64	201.21, 200.46, 188.76, 184.72, 184.18	205.24, 183.05, 178.35, 162.71, 156.11, 145.24
ir.D2.event6447	9	-	92711363	92715463	D2.event6447.1,D2.event6447.2	,92715253^92713461-	,1^2-	2	ENSG00000185963	BICD2	protein_coding	CDS.DOM	D2.event6447.1	Known-Coding	0.0210907	0	0.537981	0.658467	52, 46, 46, 44, 42	40, 40, 35, 34, 32, 32	82, 74, 68, 63.33, 62	77, 70, 70, 66, 58, 55
ir.D2.event6447	9	-	92711363	92715463	D2.event6447.1,D2.event6447.2	,92715253^92713461-	,1^2-	2	ENSG00000185963	BICD2	protein_coding	CDS.DOM	D2.event6447.2	Known-Coding	0.0210907	0	0.462019	0.341533	30, 28, 24, 20, 17.33	37, 36, 35, 26, 26, 23	82, 74, 68, 63.33, 62	77, 70, 70, 66, 58, 55
ir.D3.event1136	11	-	10801087	10802209	D3.event1136.1,D3.event1136.2,D3.event1136.3	10802049^,10802049^10801774-10801661^,10801661^	1^,1^2-3^,3^	3	ENSG00000110321	EIF4G2	protein_coding	UTR-3	D3.event1136.1	Known-Coding	0.0213838	0.00377965	0.0695045	0.0910642	181, 180, 179, 173.5, 157.5	137.5, 118.5, 114, 96.5, 87, 85	1996.54, 1953.12, 1916.55, 1864.52, 1859.55	1669.93, 1645.43, 1594.12, 1468.77, 1443.2, 1348.54
ir.D3.event1136	11	-	10801087	10802209	D3.event1136.1,D3.event1136.2,D3.event1136.3	10802049^,10802049^10801774-10801661^,10801661^	1^,1^2-3^,3^	3	ENSG00000110321	EIF4G2	protein_coding	UTR-3	D3.event1136.2	Known-Coding	0.0213838	0.171376	0.824023	0.80234	1635, 1555.04, 1541.84, 1503.67, 1461.87	1352.7, 1351.3, 1302.39, 1210.65, 1194.31, 1141.51	1996.54, 1953.12, 1916.55, 1864.52, 1859.55	1669.93, 1645.43, 1594.12, 1468.77, 1443.2, 1348.54
ir.D3.event1136	11	-	10801087	10802209	D3.event1136.1,D3.event1136.2,D3.event1136.3	10802049^,10802049^10801774-10801661^,10801661^	1^,1^2-3^,3^	3	ENSG00000110321	EIF4G2	protein_coding	UTR-3	D3.event1136.3	UTR-3	0.0213838	1	0.106473	0.106596	232.28, 217.68, 203.35, 188.04, 180.51	204.63, 177.96, 173.23, 155.23, 145.55, 122.03	1996.54, 1953.12, 1916.55, 1864.52, 1859.55	1669.93, 1645.43, 1594.12, 1468.77, 1443.2, 1348.54
D2.event11883	3	+	152447773	152456267	D2.event11883.1,D2.event11883.2	,152455542-152455577^	,1-2^	2	ENSG00000152601	MBNL1	protein_coding	CDS	D2.event11883.1	Known-Coding	0.0214151	0	0.209504	0.111925	10, 9, 8, 6, 4	15, 13, 13, 13, 13, 9	71.48, 70.35, 69.33, 64.44, 56.3	74.79, 66.5, 64.86, 56.43, 51.34, 50.42
D2.event11883	3	+	152447773	152456267	D2.event11883.1,D2.event11883.2	,152455542-152455577^	,1-2^	2	ENSG00000152601	MBNL1	protein_coding	CDS	D2.event11883.2	Known-Coding	0.0214151	0	0.790496	0.888075	66.35, 62.48, 59.33, 56.44, 50.3	59.79, 55.86, 53.5, 43.43, 38.34, 37.42	71.48, 70.35, 69.33, 64.44, 56.3	74.79, 66.5, 64.86, 56.43, 51.34, 50.42
D3.event5772	15	-	29701689	29704305	D3.event5772.1,D3.event5772.2,D3.event5772.3	29704222^,29704201^,29704162^	1^,2^,3^	3	ENSG00000104067	TJP1	protein_coding	CDS.DOM	D3.event5772.1	Known-Coding	0.0214912	0.00982366	0.201193	0.306044	58, 47, 45, 39, 39	34, 26, 20, 19, 14, 9	172, 154, 144, 141, 136	127, 108, 98, 95, 89, 80.5
D3.event5772	15	-	29701689	29704305	D3.event5772.1,D3.event5772.2,D3.event5772.3	29704222^,29704201^,29704162^	1^,2^,3^	3	ENSG00000104067	TJP1	protein_coding	CDS.DOM	D3.event5772.2	Known-Coding	0.0214912	0.141506	0.331408	0.248484	48, 42, 38, 35, 23	40, 34, 34, 33, 30, 26	172, 154, 144, 141, 136	127, 108, 98, 95, 89, 80.5
D3.event5772	15	-	29701689	29704305	D3.event5772.1,D3.event5772.2,D3.event5772.3	29704222^,29704201^,29704162^	1^,2^,3^	3	ENSG00000104067	TJP1	protein_coding	CDS.DOM	D3.event5772.3	Known-Coding	0.0214912	1	0.467399	0.445472	77, 77, 67, 63, 49	59, 48, 45.5, 43, 42, 41	172, 154, 144, 141, 136	127, 108, 98, 95, 89, 80.5
ir.D3.event1618	12	-	53314298	53315094	D3.event1618.1,D3.event1618.2,D3.event1618.3	53314849-,53314849-53314751^53314441-,53314441-	1-,1-2^3-,3-	3	ENSG00000094914	AAAS	protein_coding	CDS.DOM	D3.event1618.3	Known-Coding	0.0218117	0.00409358	0.104942	0.167755	50, 40, 36, 31, 28	30, 30, 26, 23, 17, 16	248.24, 247.99, 218.48, 202.99, 186.35	238.82, 237.49, 235.75, 215.99, 215.73, 208.72
ir.D3.event1618	12	-	53314298	53315094	D3.event1618.1,D3.event1618.2,D3.event1618.3	53314849-,53314849-53314751^53314441-,53314441-	1-,1-2^3-,3-	3	ENSG00000094914	AAAS	protein_coding	CDS.DOM	D3.event1618.2	Known-Coding	0.0218117	0.444947	0.773419	0.726213	181.99, 178.49, 157.68, 146.43, 136.5	189.39, 184, 172.5, 171.46, 165.02, 164.44	248.24, 247.99, 218.48, 202.99, 186.35	238.82, 237.49, 235.75, 215.99, 215.73, 208.72
ir.D3.event1618	12	-	53314298	53315094	D3.event1618.1,D3.event1618.2,D3.event1618.3	53314849-,53314849-53314751^53314441-,53314441-	1-,1-2^3-,3-	3	ENSG00000094914	AAAS	protein_coding	CDS.DOM	D3.event1618.1	PTC_50_All	0.0218117	1	0.121639	0.106033	30, 29.8, 29.75, 16.49, 11.92	34.29, 28.28, 27.97, 26.23, 23.49, 23.43	248.24, 247.99, 218.48, 202.99, 186.35	238.82, 237.49, 235.75, 215.99, 215.73, 208.72
[truncated: 11,407 more rows]

## Sheet: events only 
EID
D2.event3683
D2.event2918
D2.event17303
D3.event161
D2.event1810
D2.event6283
D2.event12446
D3.event16559
ir.D4.event6420
ir.D3.event90
D2.event305
D3.event11020
ir.D4.event3320
D2.event5271
D2.event11151
D3.event8513
D2.event1261
D3.event9477
D2.event2560
D2.event16156
D4.event4215
D2.event2708
ir.D5.event4057
D2.event1512
[truncated: 4,960 more rows]
