# Supplementary material for: CD146-assisted isolation and multi-omics characterisation of human pluripotent stem cell derived cranial Schwann cell precursor-like cells.
Source: Research Square preprint supplement (doi:10.21203/rs.3.rs-3324198/v1), 2023-09-19
Supplement: Supplementary file 15 [file f3b8dd1d8971ad4403c5dcf6.xlsx]

## Sheet: Sheet1
Gene Ontology Processes Enriched Among Genes Hosting Differentially Spliced Events
Enrichment FDR	Genes in list	Total genes	Functional Category	Genes
6.90763e-10	72	4098	Organelle organization	SMARCB1 MAP4 SYNE2 PFN2 PICALM DNM2 EPB41L2 MACF1 CLN6 NASP SEC31A MBD1 EML4 PARD3 ADD3 EPB41 PRMT2 WRN MTA1 TPM2 PAM16 TINF2 AP1G1 CTNNB1 NDUFS1 ACIN1 SEC24B OGT MKI67 CHEK1 CHD3 PACS2 FLNA NISCH FAT1 CTTN CCSER2 PRKAR1A C2CD5 ADGRG6 ECT2 CREB1 ACTN4 FHOD3 BIN1 KIFC3 NCOR1 ANK2 PIK3R1 PAM DOCK1 INO80E IQCB1 SS18L1 BICD2 PDLIM7 SVIL USP33 GAB1 STK25 DOCK7 KIF13A YWHAZ TMEM170A TMEM126B MYO18A ARH…
1.49533e-08	37	1386	Cytoskeleton organization	MAP4 SYNE2 PFN2 EPB41L2 MACF1 EML4 PARD3 ADD3 EPB41 TPM2 CHEK1 CTNNB1 CHD3 FLNA NISCH FAT1 CTTN CCSER2 PRKAR1A ECT2 ACTN4 FHOD3 BIN1 ANK2 PIK3R1 PAM DOCK1 BICD2 PDLIM7 SVIL USP33 GAB1 DOCK7 NCOR1 MYO18A ARHGEF11 ALDOA
1.7101e-07	32	1172	Cellular component morphogenesis	MAP4K4 SS18L1 LAMB1 MACF1 ALDOA ROBO1 FYN FERMT2 PICALM USP33 DNM2 PQBP1 PTPRZ1 PRKAR1A ECT2 STK25 CREB1 FHOD3 SEC24B ANK2 APBB2 CTNNB1 FLNA DOCK7 ACTN4 DOCK1 EPB41 CTTN GAB1 PIK3R1 PARD3 PDLIM7
3.19827e-07	25	756	Cell morphogenesis involved in differentiation	SS18L1 LAMB1 MACF1 ROBO1 FYN FERMT2 PICALM USP33 DNM2 PQBP1 PTPRZ1 STK25 CREB1 SEC24B APBB2 CTNNB1 FLNA DOCK7 ACTN4 DOCK1 CTTN GAB1 PIK3R1 PARD3 PDLIM7
8.87256e-07	29	1067	Cell morphogenesis	MAP4K4 SS18L1 LAMB1 MACF1 ALDOA ROBO1 FYN FERMT2 PICALM USP33 DNM2 PQBP1 PTPRZ1 ECT2 STK25 CREB1 SEC24B APBB2 CTNNB1 FLNA DOCK7 ACTN4 DOCK1 EPB41 CTTN GAB1 PIK3R1 PARD3 PDLIM7
1.65899e-06	24	779	Actin filament-based process	PFN2 EPB41L2 ADD3 EPB41 TPM2 FLNA NISCH SYNE2 FAT1 CTTN PRKAR1A ECT2 ACTN4 FHOD3 BIN1 PIK3R1 PAM PDLIM7 ANK2 GAB1 MYO18A ARHGEF11 MYL6 ALDOA
1.65899e-06	48	2653	Regulation of cellular component organization	YWHAZ PFN2 MACF1 ADD3 SS18L1 SCARB1 CTNNB1 PICALM DNM2 MKI67 CHEK1 ALDOA DFFA ROBO1 FYN SYNE2 MAP4K4 FERMT2 CTTN PQBP1 PRKAR1A C2CD5 CRBN ECT2 STK25 CREB1 ACTN4 FHOD3 BIN1 SEC24B PIK3R1 PAM APBB2 FLNA PAM16 TINF2 BICD2 MAP4 IP6K2 SMARCB1 OGT DOCK1 EPB41 MYO18A ARHGEF11 KIAA1109 TJP1 CDC25C
4.36689e-06	54	3309	Cellular component assembly	CELF2 SFSWAP PFN2 NUBP2 EIF4H LUC7L3 SRSF6 MACF1 NASP SEC31A ADD3 CELF1 CTNND1 CTNNB1 PICALM ECT2 SEC24B MAT2A PACS2 FLNA SPAG9 SYNE2 FERMT2 DNM2 CTTN SMARCB1 AIMP2 PRKAR1A CRBN CREB1 ACTN4 FHOD3 BIN1 ANK2 PIK3R1 PAM PARD3 EPB41 IQCB1 MAP4 TINF2 STK25 KIF13A NCOR1 YWHAZ TMEM170A TMEM126B MAP4K4 ALDOA NDUFS1 SRSF5 TJP1 CENPL WRN
6.64187e-06	56	3556	Cellular component biogenesis	CELF2 SFSWAP PFN2 NUBP2 EIF4H LUC7L3 SRSF6 MACF1 NASP SEC31A NVL ADD3 CELF1 CTNND1 CTNNB1 PICALM ECT2 SEC24B MAT2A PACS2 FLNA SPAG9 SYNE2 FERMT2 DNM2 CTTN SMARCB1 NOP56 AIMP2 PRKAR1A CRBN CREB1 ACTN4 FHOD3 BIN1 ANK2 PIK3R1 PAM PARD3 EPB41 IQCB1 MAP4 TINF2 STK25 KIF13A NCOR1 YWHAZ TMEM170A TMEM126B MAP4K4 ALDOA NDUFS1 SRSF5 TJP1 CENPL WRN
1.27719e-05	21	687	Actin cytoskeleton organization	PFN2 EPB41L2 ADD3 EPB41 TPM2 FLNA NISCH FAT1 CTTN PRKAR1A ECT2 ACTN4 FHOD3 BIN1 PIK3R1 PAM PDLIM7 GAB1 MYO18A ARHGEF11 ALDOA
1.81217e-05	14	307	Cell junction organization	MACF1 CTNND1 FERMT2 ACTN4 ANK2 PARD3 CTNNB1 ECT2 KIFC3 MAP4K4 CTTN TJP1 CADM1 FLNA
2.11056e-05	6	33	MRNA splice site selection	CELF2 SFSWAP LUC7L3 SRSF6 CELF1 SRSF5
2.11056e-05	17	484	RNA splicing	CELF2 SFSWAP SRSF5 LUC7L3 SRSF6 CELF1 MBNL1 ACIN1 PQBP1 QKI SREK1 PUF60 TSEN15 CLK1 PIK3R1 CPSF4 PCF11
2.11056e-05	10	145	Regulation of RNA splicing	CELF2 SRSF5 SRSF6 CELF1 MBNL1 SREK1 CLK1 PQBP1 PIK3R1 SFSWAP
2.11056e-05	19	598	Cell morphogenesis involved in neuron differentiation	SS18L1 MACF1 ROBO1 FYN PICALM USP33 DNM2 PQBP1 PTPRZ1 STK25 CREB1 SEC24B APBB2 DOCK7 CTTN GAB1 PIK3R1 PARD3 PDLIM7
2.11056e-05	20	666	Neuron projection morphogenesis	MAP4K4 SS18L1 MACF1 ROBO1 FYN PICALM USP33 DNM2 PQBP1 PTPRZ1 STK25 CREB1 APBB2 DOCK7 CTNNB1 CTTN GAB1 PIK3R1 PARD3 PDLIM7
2.11056e-05	8	79	Alternative mRNA splicing, via spliceosome	CELF2 SRSF5 SRSF6 CELF1 MBNL1 SFSWAP PQBP1 SREK1
2.17602e-05	40	2230	Cell development	MAP4 MAP4K4 ADGRG6 SS18L1 LAMB1 MACF1 BIN1 ROBO1 SPAG9 FYN FERMT2 PICALM USP33 DNM2 PQBP1 PTPRZ1 PRKAR1A QKI ECT2 STK25 CREB1 FHOD3 SEC24B CELF1 APBB2 YWHAZ CTNNB1 FLNA TJP1 DOCK7 ACTN4 DOCK1 CTTN BLOC1S1 ANK2 PARD3 PRMT2 GAB1 PIK3R1 PDLIM7
2.60066e-05	20	680	Plasma membrane bounded cell projection morphogenesis	MAP4K4 SS18L1 MACF1 ROBO1 FYN PICALM USP33 DNM2 PQBP1 PTPRZ1 STK25 CREB1 APBB2 DOCK7 CTNNB1 CTTN GAB1 PIK3R1 PARD3 PDLIM7
2.60066e-05	20	682	Cell projection morphogenesis	MAP4K4 SS18L1 MACF1 ROBO1 FYN PICALM USP33 DNM2 PQBP1 PTPRZ1 STK25 CREB1 APBB2 DOCK7 CTNNB1 CTTN GAB1 PIK3R1 PARD3 PDLIM7
3.81902e-05	20	701	Cell part morphogenesis	MAP4K4 SS18L1 MACF1 ROBO1 FYN PICALM USP33 DNM2 PQBP1 PTPRZ1 STK25 CREB1 APBB2 DOCK7 CTNNB1 CTTN GAB1 PIK3R1 PARD3 PDLIM7
5.44467e-05	16	474	Axonogenesis	MACF1 ROBO1 PICALM USP33 DNM2 PTPRZ1 STK25 CREB1 APBB2 DOCK7 CTTN FYN GAB1 PIK3R1 PARD3 PDLIM7
5.44467e-05	24	1008	Neuron projection development	MAP4 MAP4K4 SS18L1 LAMB1 MACF1 ROBO1 FYN PICALM USP33 DNM2 PQBP1 PTPRZ1 STK25 CREB1 SEC24B APBB2 DOCK7 CTNNB1 CTTN BLOC1S1 GAB1 PIK3R1 PARD3 PDLIM7
5.44467e-05	12	255	Cell junction assembly	MACF1 CTNND1 FERMT2 ACTN4 ANK2 PARD3 ECT2 CTNNB1 MAP4K4 CTTN TJP1 FLNA
5.44467e-05	36	1981	Cellular protein localization	ZC3H11A EXOC1 KIF13A SEC31A ANK2 PACS2 PAM16 SYNE2 MACF1 NVL PIK3R1 WRN CTNNB1 FLNA FYN FERMT2 CTTN RAB11FIP3 AP1B1 C2CD5 ECT2 SEC24B PARD3 PKDCC YWHAZ AP1G1 BICD2 PICALM EPB41L2 TINF2 TSPAN14 EPB41 SRSF5 SRSF6 CPSF4 SYNRG
5.44467e-05	48	3087	Cellular localization	ZC3H11A PICALM DNM2 RAB11FIP3 EXOC1 BLOC1S1 KIF13A SEC31A KIAA1109 ANK2 PARD3 PACS2 PAM16 SPAG9 SYNE2 STK25 MACF1 SEC24B NVL PIK3R1 WRN CTNNB1 FLNA FYN MAP4 PFN2 MAP4K4 FERMT2 CTTN AP1B1 C2CD5 ECT2 BIN1 PKDCC YWHAZ AP1G1 BICD2 EPB41L2 TINF2 TSPAN14 ACTN4 EPB41 DOCK7 SRSF5 SRSF6 CPSF4 IQCB1 SYNRG
5.79895e-05	36	1993	Cellular macromolecule localization	ZC3H11A EXOC1 KIF13A SEC31A ANK2 PACS2 PAM16 SYNE2 MACF1 NVL PIK3R1 WRN CTNNB1 FLNA FYN FERMT2 CTTN RAB11FIP3 AP1B1 C2CD5 ECT2 SEC24B PARD3 PKDCC YWHAZ AP1G1 BICD2 PICALM EPB41L2 TINF2 TSPAN14 EPB41 SRSF5 SRSF6 CPSF4 SYNRG
7.67127e-05	41	2474	Nervous system development	YWHAZ VCAN MAP4 MAP4K4 ADGRG6 SS18L1 CTNNB1 LAMB1 MACF1 ROBO1 TFAP2B SPAG9 FYN SYNE2 PICALM USP33 DNM2 SMARCB1 PQBP1 PTPRZ1 QKI ECT2 STK25 DOCK7 CREB1 SEC24B ANK2 PAM APBB2 WRN FLNA CTNND1 BIN1 CTTN BLOC1S1 PARD3 MBNL1 GAB1 PIK3R1 PTS PDLIM7
0.000139998	16	514	Establishment of organelle localization	PICALM DNM2 PARD3 MAP4 SYNE2 PFN2 KIF13A CTNNB1 BICD2 STK25 ACTN4 YWHAZ DOCK7 BLOC1S1 SEC31A SEC24B
0.000141369	25	1154	Neuron development	MAP4 MAP4K4 SS18L1 LAMB1 MACF1 ROBO1 FYN PICALM USP33 DNM2 PQBP1 PTPRZ1 STK25 CREB1 SEC24B APBB2 YWHAZ DOCK7 CTNNB1 CTTN BLOC1S1 GAB1 PIK3R1 PARD3 PDLIM7
0.000141369	16	517	Axon development	MACF1 ROBO1 PICALM USP33 DNM2 PTPRZ1 STK25 CREB1 APBB2 DOCK7 CTTN FYN GAB1 PIK3R1 PARD3 PDLIM7
0.000175832	28	1412	Neuron differentiation	MAP4 MAP4K4 SS18L1 CTNNB1 LAMB1 MACF1 ROBO1 SPAG9 FYN PICALM USP33 DNM2 PQBP1 PTPRZ1 ECT2 STK25 CREB1 SEC24B APBB2 YWHAZ DOCK7 BIN1 CTTN BLOC1S1 GAB1 PIK3R1 PARD3 PDLIM7
0.000179074	23	1019	RNA processing	CELF2 SFSWAP SRSF5 LUC7L3 SRSF6 CELF1 MBNL1 CPSF4 PCF11 INTS3 NVL ACIN1 PQBP1 QKI SREK1 PUF60 TSEN15 METTL6 CLK1 NCOR1 PIK3R1 ZC3H11A NOP56
0.000202391	43	2785	Anatomical structure morphogenesis	MAP4K4 ADGRG6 SS18L1 CTNNB1 RNH1 LAMB1 SRSF6 MACF1 ALDOA ROBO1 FLNA TFAP2B FYN FERMT2 PICALM USP33 DNM2 PQBP1 SUPT20H TJP1 PTPRZ1 PRKAR1A QKI ECT2 STK25 CREB1 FHOD3 SEC24B ANK2 PAM PKDCC APBB2 GAB1 DOCK7 ACTN4 DOCK1 EPB41 CTTN MBNL1 FAT1 PIK3R1 PARD3 PDLIM7
0.000202391	31	1683	Neurogenesis	MAP4 MAP4K4 ADGRG6 SS18L1 CTNNB1 LAMB1 MACF1 ROBO1 SPAG9 FYN SYNE2 PICALM USP33 DNM2 PQBP1 PTPRZ1 ECT2 STK25 CREB1 SEC24B APBB2 YWHAZ FLNA DOCK7 BIN1 CTTN BLOC1S1 PARD3 GAB1 PIK3R1 PDLIM7
0.000211314	45	2988	Protein localization	ZC3H11A EXOC1 KIF13A SEC31A ANK2 PARD3 PACS2 PAM16 SYNE2 PICALM RAB11FIP3 MACF1 NVL PIK3R1 WRN CTNNB1 CADM1 FLNA FYN MAP4K4 FERMT2 CTTN AP1B1 C2CD5 ECT2 ACTN4 NASP SEC24B PAM PKDCC YWHAZ AP1G1 EXOC7 BICD2 SYNRG TFAP2B DNM2 EPB41L2 TINF2 TSPAN14 EPB41 MYO18A SRSF5 SRSF6 CPSF4
0.000362164	48	3354	Macromolecule localization	ZC3H11A EXOC1 KIF13A SEC31A ANK2 PARD3 PACS2 PAM16 NCOR1 SYNE2 SCARB1 PICALM RAB11FIP3 MACF1 NVL PIK3R1 WRN CTNNB1 CADM1 FLNA FYN MAP4K4 FERMT2 CTTN AP1B1 C2CD5 QKI ECT2 ACTN4 NASP SEC24B PAM PKDCC YWHAZ AP1G1 EXOC7 BICD2 SYNRG TFAP2B DNM2 EPB41L2 TINF2 TSPAN14 EPB41 MYO18A SRSF5 SRSF6 CPSF4
0.000392199	35	2106	Apoptotic process	DFFA WRN TFAP2B NDUFS1 ACIN1 ECT2 BIN1 OGT CHEK1 CTNNB1 NISCH FYN RAI14 CTTN AIMP2 CREB1 SRSF6 ACTN4 PIK3R1 DOCK1 APBB2 PACS2 PUF60 CADM1 PAM16 STK25 PRMT2 IP6K2 MAP4K4 ROBO1 MYO18A FLNA DNM2 ARHGEF11 YWHAZ
0.000395712	29	1575	Generation of neurons	MAP4 MAP4K4 SS18L1 CTNNB1 LAMB1 MACF1 ROBO1 SPAG9 FYN PICALM USP33 DNM2 PQBP1 PTPRZ1 ECT2 STK25 CREB1 SEC24B APBB2 YWHAZ FLNA DOCK7 BIN1 CTTN BLOC1S1 GAB1 PIK3R1 PARD3 PDLIM7
0.000419377	16	575	MRNA processing	CELF2 SFSWAP SRSF5 LUC7L3 SRSF6 CELF1 MBNL1 CPSF4 PCF11 ACIN1 PQBP1 QKI SREK1 PUF60 TSEN15 ZC3H11A
0.000423238	4	18	Cargo loading into vesicle	SEC31A SEC24B PICALM KIF13A
0.00042826	12	333	Protein localization to cell periphery	ANK2 PACS2 MACF1 FLNA C2CD5 PIK3R1 PKDCC PICALM EPB41L2 TSPAN14 EPB41 KIF13A
0.00042826	36	2220	Vesicle-mediated transport	SPAG9 PICALM DNM2 RAB11FIP3 EXOC1 BLOC1S1 SEC31A KIAA1109 CSNK1G3 SCARB1 MACF1 SEC24B PFN2 USP33 CTTN AP1B1 C2CD5 ACTN4 BIN1 ANK2 DOCK1 PKDCC AP1G1 CTNNB1 EXOC7 BICD2 SYNRG KIF13A MYO18A FYN APLP2 TSPAN14 PIK3R1 ALDOA PDLIM7 FLNA
0.00042826	29	1589	Cell projection organization	MAP4 MAP4K4 SS18L1 LAMB1 MACF1 ROBO1 FYN SYNE2 PFN2 PICALM USP33 DNM2 CTTN NUBP2 PQBP1 PTPRZ1 STK25 CREB1 SEC24B APBB2 IQCB1 FLNA DOCK7 CTNNB1 BLOC1S1 GAB1 PIK3R1 PARD3 PDLIM7
0.000438	60	4671	Cellular developmental process	VCAN FYN MAP4 MAP4K4 ADGRG6 WRN SS18L1 CTNNB1 TFAP2B LAMB1 MACF1 BIN1 ALDOA ROBO1 SPAG9 RAI14 SYNE2 FERMT2 PICALM USP33 DNM2 SUCO SMARCB1 PQBP1 PTPRZ1 AIMP2 PRKAR1A QKI ECT2 STK25 DOCK7 CREB1 FHOD3 SEC24B ANK2 PIK3R1 PARD3 CELF1 DOCK1 PKDCC APBB2 YWHAZ CADM1 PDLIM7 FLNA ACIN1 TJP1 FOXM1 SRSF6 ACTN4 EPB41 AP1G1 IQCB1 CTTN BLOC1S1 MBNL1 PRMT2 KIAA1109 CHEK1 GAB1
0.000474555	18	726	Organelle localization	PICALM DNM2 PARD3 STK25 MAP4 SYNE2 PFN2 BIN1 KIF13A CTNNB1 BICD2 ACTN4 BLOC1S1 YWHAZ DOCK7 SEC31A SEC24B IQCB1
0.000522709	6	68	Spliceosomal complex assembly	CELF2 SFSWAP LUC7L3 SRSF6 CELF1 SRSF5
0.000522709	6	68	Regulation of alternative mRNA splicing, via spliceosome	CELF2 SRSF5 SRSF6 CELF1 MBNL1 SREK1
0.000544941	7	103	Regulation of mRNA splicing, via spliceosome	CELF2 SRSF5 SRSF6 CELF1 MBNL1 SREK1 SFSWAP
0.000628608	8	146	Adherens junction organization	MACF1 FERMT2 CTNNB1 KIFC3 MAP4K4 CTTN CADM1 CTNND1
