# Supplementary material for: CD146-assisted isolation and multi-omics characterisation of human pluripotent stem cell derived cranial Schwann cell precursor-like cells.
Source: Research Square preprint supplement (doi:10.21203/rs.3.rs-3324198/v1), 2023-09-19
Supplement: Supplementary file 16 [file ffbcef86c7e29f84647d6e0a.xlsx]

## Sheet: Sheet1
Expression profiles of 1636 RNA-binding proteins
EGID	logFC	AveExpr	t	P.Value	adj.P.Val	B	Entrez_ID	Symbol	Description	Chromosome	Start	End	Strand		EGID	logFC	AveExpr	t	P.Value	adj.P.Val	B	Entrez_ID	Symbol	Description	Chromosome	Start	End	Strand	absLogFC			Symbol	logFC
ENSG00000048740	3.19153	6.56961	80.641	5.75105e-28	1.09138e-24	54.2679	10659	CELF2	CUGBP, Elav-like family member 2 [Source:HGNC Symbol;Acc:HGNC:2550]	10	10798397	11336675	1		ENSG00000111057	-7.51784	0.998356	-17.1239	6.24059e-14	8.41703e-13	21.7128	3875	KRT18	keratin 18 [Source:HGNC Symbol;Acc:HGNC:6430]	12	52948871	52952901	1	7.51784			KRT18	-7.51784
ENSG00000242265	-1.74317	8.73241	-54.7027	2.14902e-24	7.99646e-22	46.0168	23089	PEG10	paternally expressed 10 [Source:HGNC Symbol;Acc:HGNC:14005]	7	94656325	94669695	1		ENSG00000162374	6.04422	-0.317304	14.7371	1.20173e-12	1.19462e-11	19.03	1996	ELAVL4	ELAV like neuron-specific RNA binding protein 4 [Source:HGNC Symbol;Acc:HGNC:3315]	1	50048014	50203786	1	6.04422			PPARGC1A	-5.58452
ENSG00000112531	1.57211	8.35519	49.9802	1.44911e-23	3.8732e-21	44.0641	9444	QKI	QKI, KH domain containing RNA binding [Source:HGNC Symbol;Acc:HGNC:21100]	6	163414000	163578596	1		ENSG00000109819	-5.58452	-0.0859323	-9.43465	4.66541e-09	2.1339e-08	10.9816	10891	PPARGC1A	PPARG coactivator 1 alpha [Source:HGNC Symbol;Acc:HGNC:9237]	4	23755041	23904089	-1	5.58452			AFF3	-4.10182
ENSG00000173786	1.71328	8.09644	42.4143	4.62048e-22	7.24652e-20	40.5125	1267	CNP	2',3'-cyclic nucleotide 3' phosphodiesterase [Source:HGNC Symbol;Acc:HGNC:2158]	17	41966741	41977731	1		ENSG00000144218	-4.10182	2.30508	-28.1977	2.37446e-18	1.1209e-16	31.9649	3899	AFF3	AF4/FMR2 family member 3 [Source:HGNC Symbol;Acc:HGNC:6473]	2	99545419	100142739	-1	4.10182			CDC42EP4	-3.51364
ENSG00000275700	2.0449	6.73595	40.6382	1.13684e-21	1.59807e-19	39.6478	26574	AATF	apoptosis antagonizing transcription factor [Source:HGNC Symbol;Acc:HGNC:19235]	17	36948875	37056871	1		ENSG00000179604	-3.51364	3.28357	-37.9487	4.79441e-21	5.48093e-19	38.2077	23580	CDC42EP4	CDC42 effector protein 4 [Source:HGNC Symbol;Acc:HGNC:17147]	17	73283624	73312175	-1	3.51364			OAS3	-3.45055
ENSG00000179604	-3.51364	3.28357	-37.9487	4.79441e-21	5.48093e-19	38.2077	23580	CDC42EP4	CDC42 effector protein 4 [Source:HGNC Symbol;Acc:HGNC:17147]	17	73283624	73312175	-1		ENSG00000196116	3.46256	1.07938	18.2549	1.73709e-14	2.69761e-13	23.3347	23424	TDRD7	tudor domain containing 7 [Source:HGNC Symbol;Acc:HGNC:30831]	9	97411950	97496125	1	3.46256			DDX60L	-2.89607
ENSG00000100097	1.66007	4.64804	34.3471	3.87961e-20	3.18716e-18	36.2082	3956	LGALS1	galectin 1 [Source:HGNC Symbol;Acc:HGNC:6561]	22	37675608	37679806	1		ENSG00000111331	-3.45055	-0.529096	-12.8936	1.57136e-11	1.21317e-10	16.5188	4940	OAS3	2'-5'-oligoadenylate synthetase 3 [Source:HGNC Symbol;Acc:HGNC:8088]	12	112938352	112973249	1	3.45055			AHNAK	-2.82565
ENSG00000185088	1.50969	6.21113	33.5163	6.47602e-20	5.01614e-18	35.5107	51065	RPS27L	ribosomal protein S27 like [Source:HGNC Symbol;Acc:HGNC:18476]	15	63125872	63158021	-1		ENSG00000048740	3.19153	6.56961	80.641	5.75105e-28	1.09138e-24	54.2679	10659	CELF2	CUGBP, Elav-like family member 2 [Source:HGNC Symbol;Acc:HGNC:2550]	10	10798397	11336675	1	3.19153			TNS1	-2.48487
ENSG00000197381	1.67615	4.8573	30.8828	3.5774e-19	2.21857e-17	33.9038	104	ADARB1	adenosine deaminase, RNA specific B1 [Source:HGNC Symbol;Acc:HGNC:226]	21	45073853	45226560	1		ENSG00000181381	-2.89607	1.78829	-15.194	6.62063e-13	6.94526e-12	19.6952	91351	DDX60L	DEAD-box helicase 60-like [Source:HGNC Symbol;Acc:HGNC:26429]	4	168356735	168537786	-1	2.89607			SRRM3	-2.30971
ENSG00000124942	-2.82565	6.33589	-29.0606	1.26922e-18	6.61705e-17	32.5118	79026	AHNAK	AHNAK nucleoprotein [Source:HGNC Symbol;Acc:HGNC:347]	11	62433542	62556235	-1		ENSG00000124942	-2.82565	6.33589	-29.0606	1.26922e-18	6.61705e-17	32.5118	79026	AHNAK	AHNAK nucleoprotein [Source:HGNC Symbol;Acc:HGNC:347]	11	62433542	62556235	-1	2.82565			FBLL1	-2.14649
ENSG00000072274	-1.09174	8.1539	-29.0358	1.29202e-18	6.69907e-17	32.3056	7037	TFRC	transferrin receptor [Source:HGNC Symbol;Acc:HGNC:11763]	3	196027183	196082189	-1		ENSG00000079308	-2.48487	3.61366	-16.7945	9.18373e-14	1.19569e-12	21.4102	7145	TNS1	tensin 1 [Source:HGNC Symbol;Acc:HGNC:11973]	2	217799789	218002995	-1	2.48487			IFI16	2.01685
ENSG00000117450	-1.34429	8.11303	-28.8623	1.46344e-18	7.44552e-17	32.1801	5052	PRDX1	peroxiredoxin 1 [Source:HGNC Symbol;Acc:HGNC:9352]	1	45511036	45523047	-1		ENSG00000129538	2.42716	2.29449	23.1669	1.37356e-16	3.8164e-15	28.152	6035	RNASE1	ribonuclease A family member 1, pancreatic [Source:HGNC Symbol;Acc:HGNC:10044]	14	20801228	20803278	-1	2.42716			AATF	2.0449
ENSG00000155363	-1.31255	5.39497	-28.7583	1.5775e-18	7.91963e-17	32.3295	4343	MOV10	Mov10 RISC complex RNA helicase [Source:HGNC Symbol;Acc:HGNC:7200]	1	112673141	112700746	1		ENSG00000177679	-2.30971	-0.749852	-8.91166	1.24224e-08	5.18678e-08	10.007	222183	SRRM3	serine/arginine repetitive matrix 3 [Source:HGNC Symbol;Acc:HGNC:26729]	7	76201900	76287288	1	2.30971			RNASE1	2.42716
ENSG00000090097	1.05029	7.11931	28.7418	1.59644e-18	7.99357e-17	32.1268	57060	PCBP4	poly(rC) binding protein 4 [Source:HGNC Symbol;Acc:HGNC:8652]	3	51957454	51974016	-1		ENSG00000188573	-2.14649	0.650099	-9.42274	4.76886e-09	2.17597e-08	10.8202		FBLL1	fibrillarin-like 1 [Source:HGNC Symbol;Acc:HGNC:35458]	5	168529116	168530634	1	2.14649			CELF2	3.19153
ENSG00000144218	-4.10182	2.30508	-28.1977	2.37446e-18	1.1209e-16	31.9649	3899	AFF3	AF4/FMR2 family member 3 [Source:HGNC Symbol;Acc:HGNC:6473]	2	99545419	100142739	-1		ENSG00000275700	2.0449	6.73595	40.6382	1.13684e-21	1.59807e-19	39.6478	26574	AATF	apoptosis antagonizing transcription factor [Source:HGNC Symbol;Acc:HGNC:19235]	17	36948875	37056871	1	2.0449			TDRD7	3.46256
ENSG00000121766	1.23211	6.39833	27.4756	4.06794e-18	1.77058e-16	31.2054	51538	ZCCHC17	zinc finger CCHC-type containing 17 [Source:HGNC Symbol;Acc:HGNC:30246]	1	31296982	31364953	1		ENSG00000163565	2.01685	2.24235	12.3778	3.3984e-11	2.43272e-10	15.4948	3428	IFI16	interferon gamma inducible protein 16 [Source:HGNC Symbol;Acc:HGNC:5395]	1	158999968	159055155	1	2.01685			ELAVL4	6.04422
ENSG00000172667	1.77102	6.21754	27.1059	5.38646e-18	2.27153e-16	30.939	64393	ZMAT3	zinc finger matrin-type 3 [Source:HGNC Symbol;Acc:HGNC:29983]	3	179017223	179072279	-1
ENSG00000096080	1.27931	5.56674	26.6533	7.63482e-18	3.10914e-16	30.6388	55168	MRPS18A	mitochondrial ribosomal protein S18A [Source:HGNC Symbol;Acc:HGNC:14515]	6	43671303	43687791	-1
ENSG00000059573	1.08713	7.55184	26.3541	9.64373e-18	3.80476e-16	30.2368	5832	ALDH18A1	aldehyde dehydrogenase 18 family member A1 [Source:HGNC Symbol;Acc:HGNC:9722]	10	95605929	95656706	-1
ENSG00000155966	-1.93303	4.14696	-25.0282	2.80143e-17	9.86322e-16	29.5947	2334	AFF2	AF4/FMR2 family member 2 [Source:HGNC Symbol;Acc:HGNC:3776]	X	148500619	149000663	1
ENSG00000104356	0.92375	6.12359	23.9648	6.85114e-17	2.07359e-15	28.2957	10940	POP1	POP1 homolog, ribonuclease P/MRP subunit [Source:HGNC Symbol;Acc:HGNC:30129]	8	98117297	98159834	1
ENSG00000163659	1.49534	5.66152	23.5422	9.87575e-17	2.85254e-15	27.9778	25976	TIPARP	TCDD inducible poly(ADP-ribose) polymerase [Source:HGNC Symbol;Acc:HGNC:23696]	3	156673235	156706770	1
ENSG00000129538	2.42716	2.29449	23.1669	1.37356e-16	3.8164e-15	28.152	6035	RNASE1	ribonuclease A family member 1, pancreatic [Source:HGNC Symbol;Acc:HGNC:10044]	14	20801228	20803278	-1
ENSG00000153944	-0.946256	7.66324	-22.5353	2.42071e-16	6.28424e-15	26.8901	124540	MSI2	musashi RNA binding protein 2 [Source:HGNC Symbol;Acc:HGNC:18585]	17	57255851	57684685	1
ENSG00000138593	0.920754	6.5811	21.8231	4.66792e-16	1.12131e-14	26.2629	9728	SECISBP2L	SECIS binding protein 2 like [Source:HGNC Symbol;Acc:HGNC:28997]	15	48988476	49046563	-1
ENSG00000088305	-1.02006	5.84474	-21.5415	6.08497e-16	1.39969e-14	26.0853	1789	DNMT3B	DNA methyltransferase 3 beta [Source:HGNC Symbol;Acc:HGNC:2979]	20	32762385	32809356	1
ENSG00000171824	0.722408	7.43815	21.0688	9.56521e-16	2.09123e-14	25.4635	5394	EXOSC10	exosome component 10 [Source:HGNC Symbol;Acc:HGNC:9138]	1	11066618	11099881	-1
ENSG00000075420	-0.732906	6.44545	-20.9051	1.12112e-15	2.39859e-14	25.3749	64778	FNDC3B	fibronectin type III domain containing 3B [Source:HGNC Symbol;Acc:HGNC:24670]	3	172039628	172401665	1
ENSG00000179218	-0.72936	9.21075	-20.8221	1.21558e-15	2.55195e-14	25.1368	811	CALR	calreticulin [Source:HGNC Symbol;Acc:HGNC:1455]	19	12938578	12944489	1
ENSG00000243927	-1.00413	5.58762	-19.9264	2.96783e-15	5.54336e-14	24.4752	64968	MRPS6	mitochondrial ribosomal protein S6 [Source:HGNC Symbol;Acc:HGNC:14051]	21	34073224	34143034	1
ENSG00000255561	1.39862	3.07575	19.6997	3.74164e-15	6.85377e-14	24.6752	91893	FDXACB1	ferredoxin-fold anticodon binding domain containing 1 [Source:HGNC Symbol;Acc:HGNC:25110]	11	111874056	111881243	-1
ENSG00000173744	0.761262	7.03652	19.4718	4.73417e-15	8.49152e-14	23.8223	3267	AGFG1	ArfGAP with FG repeats 1 [Source:HGNC Symbol;Acc:HGNC:5175]	2	227472152	227561214	1
ENSG00000119917	1.76823	2.55774	19.3192	5.55027e-15	9.78879e-14	24.3659	3437	IFIT3	interferon induced protein with tetratricopeptide repeats 3 [Source:HGNC Symbol;Acc:HGNC:5411]	10	89327894	89340971	1
ENSG00000110619	-0.697296	5.99648	-19.0653	7.24847e-15	1.24709e-13	23.4803	833	CARS	cysteinyl-tRNA synthetase [Source:HGNC Symbol;Acc:HGNC:1493]	11	3000922	3057613	-1
ENSG00000136026	-0.647769	7.55385	-19.019	7.61309e-15	1.29689e-13	23.3057	10970	CKAP4	cytoskeleton associated protein 4 [Source:HGNC Symbol;Acc:HGNC:16991]	12	106237877	106304279	-1
ENSG00000065150	-0.622989	8.9452	-18.9454	8.23126e-15	1.38932e-13	23.1556	3843	IPO5	importin 5 [Source:HGNC Symbol;Acc:HGNC:6402]	13	97953658	98024297	1
ENSG00000116560	0.59046	9.35551	18.8844	8.78432e-15	1.47002e-13	23.0667	6421	SFPQ	splicing factor proline and glutamine rich [Source:HGNC Symbol;Acc:HGNC:10774]	1	35176378	35193148	-1
ENSG00000239306	0.86953	6.72416	18.7276	1.03902e-14	1.70419e-13	23.025	10432	RBM14	RNA binding motif protein 14 [Source:HGNC Symbol;Acc:HGNC:14219]	11	66616582	66627347	1
ENSG00000155660	-0.59362	8.21732	-18.6899	1.08209e-14	1.76719e-13	22.9045	9601	PDIA4	protein disulfide isomerase family A member 4 [Source:HGNC Symbol;Acc:HGNC:30167]	7	149003062	149028641	-1
ENSG00000136261	0.765553	7.23217	18.5777	1.22137e-14	1.97427e-13	22.8246	28969	BZW2	basic leucine zipper and W2 domains 2 [Source:HGNC Symbol;Acc:HGNC:18808]	7	16646131	16706523	1
ENSG00000107105	-1.42841	4.5756	-18.5387	1.27409e-14	2.04729e-13	23.1716	1993	ELAVL2	ELAV like neuron-specific RNA binding protein 2 [Source:HGNC Symbol;Acc:HGNC:3313]	9	23690104	23826337	-1
ENSG00000110063	0.899111	4.77208	18.5138	1.30907e-14	2.0911e-13	23.0364	28960	DCPS	decapping enzyme, scavenger [Source:HGNC Symbol;Acc:HGNC:29812]	11	126303752	126345749	1
ENSG00000120658	1.47899	3.54982	18.2977	1.65723e-14	2.57992e-13	23.0529	55068	ENOX1	ecto-NOX disulfide-thiol exchanger 1 [Source:HGNC Symbol;Acc:HGNC:25474]	13	43213518	43786908	-1
ENSG00000196116	3.46256	1.07938	18.2549	1.73709e-14	2.69761e-13	23.3347	23424	TDRD7	tudor domain containing 7 [Source:HGNC Symbol;Acc:HGNC:30831]	9	97411950	97496125	1
ENSG00000244509	1.99882	2.46135	18.209	1.82695e-14	2.8279e-13	23.1701	27350	APOBEC3C	apolipoprotein B mRNA editing enzyme catalytic subunit 3C [Source:HGNC Symbol;Acc:HGNC:17353]	22	39014083	39020352	1
ENSG00000185608	1.07919	4.54355	18.119	2.01788e-14	3.09566e-13	22.6347	64976	MRPL40	mitochondrial ribosomal protein L40 [Source:HGNC Symbol;Acc:HGNC:14491]	22	19431902	19436075	1
ENSG00000121390	0.603927	6.76944	17.8586	2.69701e-14	3.98778e-13	22.0291	55269	PSPC1	paraspeckle component 1 [Source:HGNC Symbol;Acc:HGNC:20320]	13	19674752	19783019	-1
ENSG00000111364	0.798327	5.54644	17.8557	2.70572e-14	3.99273e-13	22.1512	57696	DDX55	DEAD-box helicase 55 [Source:HGNC Symbol;Acc:HGNC:20085]	12	123602077	123620941	1
ENSG00000165359	0.750321	6.16995	17.6506	3.40929e-14	4.91627e-13	21.8349	203522	INTS6L	integrator complex subunit 6 like [Source:HGNC Symbol;Acc:HGNC:27334]	X	135520659	135582510	1
ENSG00000181026	1.06937	6.96973	17.6334	3.47655e-14	5.00565e-13	21.7519	64782	AEN	apoptosis enhancing nuclease [Source:HGNC Symbol;Acc:HGNC:25722]	15	88621296	88632282	1
ENSG00000198860	0.785141	5.61621	17.5937	3.6366e-14	5.19275e-13	21.8338	116461	TSEN15	tRNA splicing endonuclease subunit 15 [Source:HGNC Symbol;Acc:HGNC:16791]	1	184051677	184074212	1
ENSG00000149257	-1.19517	7.93849	-17.4315	4.37542e-14	6.15054e-13	21.4693	871	SERPINH1	serpin family H member 1 [Source:HGNC Symbol;Acc:HGNC:1546]	11	75562056	75572783	1
ENSG00000087302	0.603136	7.26028	17.3515	4.79653e-14	6.65378e-13	21.3998	51637	C14orf166	chromosome 14 open reading frame 166 [Source:HGNC Symbol;Acc:HGNC:23169]	14	51989475	52010691	1
ENSG00000030582	-0.918353	5.46629	-17.3391	4.86503e-14	6.73896e-13	21.585	2896	GRN	granulin [Source:HGNC Symbol;Acc:HGNC:4601]	17	44345086	44353102	1
ENSG00000170004	-0.747271	7.13594	-17.3194	4.97661e-14	6.86346e-13	21.3774	1107	CHD3	chromodomain helicase DNA binding protein 3 [Source:HGNC Symbol;Acc:HGNC:1918]	17	7884806	7912760	1
ENSG00000111057	-7.51784	0.998356	-17.1239	6.24059e-14	8.41703e-13	21.7128	3875	KRT18	keratin 18 [Source:HGNC Symbol;Acc:HGNC:6430]	12	52948871	52952901	1
ENSG00000163946	-0.671367	6.81178	-17.028	6.97863e-14	9.30011e-13	21.0468	23272	FAM208A	family with sequence similarity 208 member A [Source:HGNC Symbol;Acc:HGNC:30314]	3	56620133	56683237	-1
ENSG00000100441	0.564788	6.61864	17.0215	7.03206e-14	9.36473e-13	21.0427	23351	KHNYN	KH and NYN domain containing [Source:HGNC Symbol;Acc:HGNC:20166]	14	24429286	24441834	1
ENSG00000079308	-2.48487	3.61366	-16.7945	9.18373e-14	1.19569e-12	21.4102	7145	TNS1	tensin 1 [Source:HGNC Symbol;Acc:HGNC:11973]	2	217799789	218002995	-1
ENSG00000170445	0.583493	6.69762	16.6347	1.11029e-13	1.42269e-12	20.5618	3035	HARS	histidyl-tRNA synthetase [Source:HGNC Symbol;Acc:HGNC:4816]	5	140673173	140692024	-1
ENSG00000102879	-1.44744	3.36525	-16.5783	1.18767e-13	1.51366e-12	21.1203	11151	CORO1A	coronin 1A [Source:HGNC Symbol;Acc:HGNC:2252]	16	30182827	30189076	1
ENSG00000167004	-0.543614	7.74929	-16.5108	1.28774e-13	1.62916e-12	20.3507	2923	PDIA3	protein disulfide isomerase family A member 3 [Source:HGNC Symbol;Acc:HGNC:4606]	15	43746392	43773279	1
ENSG00000254535	-1.2633	3.44376	-16.4652	1.36018e-13	1.70941e-12	20.952	132430	PABPC4L	poly(A) binding protein cytoplasmic 4 like [Source:HGNC Symbol;Acc:HGNC:31955]	4	134196333	134201748	-1
ENSG00000112773	0.918313	5.79505	16.4562	1.37495e-13	1.72569e-12	20.4287	55603	FAM46A	family with sequence similarity 46 member A [Source:HGNC Symbol;Acc:HGNC:18345]	6	81491439	81752774	-1
ENSG00000184220	0.851767	5.01729	16.2644	1.73411e-13	2.09607e-12	20.3076	84319	CMSS1	cms1 ribosomal small subunit homolog (yeast) [Source:HGNC Symbol;Acc:HGNC:28666]	3	99817834	100181732	1
ENSG00000164610	0.843006	4.54593	16.2527	1.75911e-13	2.12358e-12	20.3848	6100	RP9	retinitis pigmentosa 9 (autosomal dominant) [Source:HGNC Symbol;Acc:HGNC:10288]	7	33094797	33109401	-1
ENSG00000182944	0.639759	8.36162	16.2506	1.76344e-13	2.12745e-12	19.9861	2130	EWSR1	EWS RNA binding protein 1 [Source:HGNC Symbol;Acc:HGNC:3508]	22	29268009	29300525	1
ENSG00000205978	-1.39099	3.86209	-16.076	2.18323e-13	2.59107e-12	20.381	57523	NYNRIN	NYN domain and retroviral integrase containing [Source:HGNC Symbol;Acc:HGNC:20165]	14	24398786	24419288	1
ENSG00000174606	0.615655	6.11898	15.9498	2.55048e-13	2.97301e-12	19.7464	90806	ANGEL2	angel homolog 2 [Source:HGNC Symbol;Acc:HGNC:30534]	1	212992182	213015826	-1
ENSG00000244462	0.536666	8.42157	15.9199	2.64673e-13	3.07011e-12	19.5607	10137	RBM12	RNA binding motif protein 12 [Source:HGNC Symbol;Acc:HGNC:9898]	20	35648925	35664956	-1
ENSG00000105939	0.774014	4.91613	15.8998	2.71324e-13	3.13958e-12	19.8607	56829	ZC3HAV1	zinc finger CCCH-type containing, antiviral 1 [Source:HGNC Symbol;Acc:HGNC:23721]	7	139043520	139109719	-1
ENSG00000102317	0.634795	8.01066	15.8567	2.8623e-13	3.29405e-12	19.4997	5935	RBM3	RNA binding motif (RNP1, RRM) protein 3 [Source:HGNC Symbol;Acc:HGNC:9900]	X	48574449	48579066	1
ENSG00000117569	0.654789	6.02952	15.824	2.98111e-13	3.41622e-12	19.5939	58155	PTBP2	polypyrimidine tract binding protein 2 [Source:HGNC Symbol;Acc:HGNC:17662]	1	96721665	96823738	1
ENSG00000108654	0.555849	9.69892	15.8111	3.02969e-13	3.46561e-12	19.3674	1655 100616387 100616408	DDX5	DEAD-box helicase 5 [Source:HGNC Symbol;Acc:HGNC:2746]	17	64499616	64508199	-1
ENSG00000129250	-0.689944	6.82448	-15.778	3.15713e-13	3.58796e-12	19.4758	10749	KIF1C	kinesin family member 1C [Source:HGNC Symbol;Acc:HGNC:6317]	17	4997948	5028401	1
ENSG00000179051	0.768319	8.14248	15.7728	3.17783e-13	3.6068e-12	19.3837	55920	RCC2	regulator of chromosome condensation 2 [Source:HGNC Symbol;Acc:HGNC:30297]	1	17406760	17439724	-1
ENSG00000137628	-1.87204	2.4665	-15.6066	3.91408e-13	4.33358e-12	20.0947	55601	DDX60	DEXD/H-box helicase 60 [Source:HGNC Symbol;Acc:HGNC:25942]	4	168216293	168318807	-1
ENSG00000104299	0.826576	5.04365	15.3696	5.28583e-13	5.68324e-12	19.1448	55756	INTS9	integrator complex subunit 9 [Source:HGNC Symbol;Acc:HGNC:25592]	8	28767661	28890242	-1
ENSG00000138767	0.840009	4.65395	15.3639	5.32432e-13	5.71814e-12	19.2131	246175	CNOT6L	CCR4-NOT transcription complex subunit 6 like [Source:HGNC Symbol;Acc:HGNC:18042]	4	77713387	77819615	-1
ENSG00000136231	0.523419	7.44858	15.2769	5.9511e-13	6.31622e-12	18.7688	10643	IGF2BP3	insulin like growth factor 2 mRNA binding protein 3 [Source:HGNC Symbol;Acc:HGNC:28868]	7	23310209	23470467	-1
ENSG00000181381	-2.89607	1.78829	-15.194	6.62063e-13	6.94526e-12	19.6952	91351	DDX60L	DEAD-box helicase 60-like [Source:HGNC Symbol;Acc:HGNC:26429]	4	168356735	168537786	-1
ENSG00000110321	0.502948	10.394	15.0941	7.53183e-13	7.80193e-12	18.3953	1982	EIF4G2	eukaryotic translation initiation factor 4 gamma 2 [Source:HGNC Symbol;Acc:HGNC:3297]	11	10797050	10809110	-1
ENSG00000173933	0.560154	7.58571	15.0898	7.5748e-13	7.8379e-12	18.51	5936	RBM4	RNA binding motif protein 4 [Source:HGNC Symbol;Acc:HGNC:9901]	11	66638617	66666682	1
ENSG00000164609	0.674719	5.10644	15.0343	8.14045e-13	8.38241e-12	18.6838	10569	SLU7	SLU7 homolog, splicing factor [Source:HGNC Symbol;Acc:HGNC:16939]	5	160401641	160421711	-1
ENSG00000154548	0.843502	4.52731	14.9778	8.76161e-13	8.97811e-12	18.7225	135295	SRSF12	serine and arginine rich splicing factor 12 [Source:HGNC Symbol;Acc:HGNC:21220]	6	89095959	89118081	-1
ENSG00000133112	0.505422	10.0415	14.9742	8.80232e-13	9.00494e-12	18.2452	7178	TPT1	tumor protein, translationally-controlled 1 [Source:HGNC Symbol;Acc:HGNC:12022]	13	45333471	45341370	-1
ENSG00000204628	0.438011	10.5098	14.962	8.94353e-13	9.13462e-12	18.2127	10399	RACK1	receptor for activated C kinase 1 [Source:HGNC Symbol;Acc:HGNC:4399]	5	181236909	181248096	-1
ENSG00000162613	0.572603	8.85122	14.9125	9.54078e-13	9.68729e-12	18.2064	8880	FUBP1	far upstream element binding protein 1 [Source:HGNC Symbol;Acc:HGNC:4004]	1	77944055	77979110	-1
ENSG00000156508	0.520065	9.71841	14.8949	9.76428e-13	9.87723e-12	18.1486	1915	EEF1A1	eukaryotic translation elongation factor 1 alpha 1 [Source:HGNC Symbol;Acc:HGNC:3189]	6	73515750	73523797	-1
ENSG00000215301	0.608487	8.99512	14.8875	9.85916e-13	9.96789e-12	18.166	1654	DDX3X	DEAD-box helicase 3, X-linked [Source:HGNC Symbol;Acc:HGNC:2745]	X	41333348	41364472	1
ENSG00000134030	0.838203	4.51907	14.8693	1.0097e-12	1.01812e-11	18.577	9811	CTIF	cap binding complex dependent translation initiation factor [Source:HGNC Symbol;Acc:HGNC:23925]	18	48539046	48863217	1
ENSG00000101452	0.635794	5.01559	14.8309	1.06196e-12	1.0678e-11	18.424	60625	DHX35	DEAH-box helicase 35 [Source:HGNC Symbol;Acc:HGNC:15861]	20	38962299	39039723	1
ENSG00000162374	6.04422	-0.317304	14.7371	1.20173e-12	1.19462e-11	19.03	1996	ELAVL4	ELAV like neuron-specific RNA binding protein 4 [Source:HGNC Symbol;Acc:HGNC:3315]	1	50048014	50203786	1
ENSG00000085760	0.618765	5.46384	14.5789	1.4824e-12	1.44561e-11	18.0011	4528	MTIF2	mitochondrial translational initiation factor 2 [Source:HGNC Symbol;Acc:HGNC:7441]	2	55236595	55269347	-1
ENSG00000179151	0.649417	5.09445	14.5457	1.54954e-12	1.50721e-11	18.0171	80153	EDC3	enhancer of mRNA decapping 3 [Source:HGNC Symbol;Acc:HGNC:26114]	15	74630558	74696292	-1
ENSG00000143799	0.523487	8.6294	14.4496	1.76248e-12	1.69521e-11	17.5777	142	PARP1	poly(ADP-ribose) polymerase 1 [Source:HGNC Symbol;Acc:HGNC:270]	1	226360691	226408079	-1
ENSG00000089280	0.572548	6.92489	14.3985	1.88807e-12	1.8014e-11	17.5987	2521	FUS	FUS RNA binding protein [Source:HGNC Symbol;Acc:HGNC:4010]	16	31180110	31194871	1
ENSG00000013441	0.626196	6.02897	14.359	1.99136e-12	1.88761e-11	17.6191	1195	CLK1	CDC like kinase 1 [Source:HGNC Symbol;Acc:HGNC:2068]	2	200853009	200864744	-1
ENSG00000122406	0.466008	9.24161	14.3295	2.07226e-12	1.95843e-11	17.3834	6125	RPL5	ribosomal protein L5 [Source:HGNC Symbol;Acc:HGNC:10360]	1	92832025	92841924	1
ENSG00000107201	0.782079	4.04564	14.3031	2.14772e-12	2.02237e-11	17.8987	23586	DDX58	DEXD/H-box helicase 58 [Source:HGNC Symbol;Acc:HGNC:19102]	9	32455705	32526324	-1
ENSG00000135870	0.510095	6.15712	14.2869	2.19526e-12	2.05827e-11	17.5037	149041	RC3H1	ring finger and CCCH-type domains 1 [Source:HGNC Symbol;Acc:HGNC:29434]	1	173931214	174022297	-1
ENSG00000125870	0.554923	5.94008	14.2243	2.39013e-12	2.22449e-11	17.4394	6629	SNRPB2	small nuclear ribonucleoprotein polypeptide B2 [Source:HGNC Symbol;Acc:HGNC:11155]	20	16729961	16742563	1
ENSG00000106462	0.470764	7.05638	14.1583	2.61503e-12	2.41251e-11	17.2519	2146	EZH2	enhancer of zeste 2 polycomb repressive complex 2 subunit [Source:HGNC Symbol;Acc:HGNC:3527]	7	148807383	148884321	-1
ENSG00000142534	0.45467	9.67679	14.1089	2.79787e-12	2.56127e-11	17.0547	6205	RPS11	ribosomal protein S11 [Source:HGNC Symbol;Acc:HGNC:10384]	19	49496365	49499689	1
ENSG00000254726	0.457547	7.18503	13.9265	3.59684e-12	3.20758e-11	16.9127	92312	MEX3A	mex-3 RNA binding family member A [Source:HGNC Symbol;Acc:HGNC:33482]	1	156072013	156081998	-1
ENSG00000163902	-0.468193	7.99885	-13.9083	3.68839e-12	3.28151e-11	16.8459	6184	RPN1	ribophorin I [Source:HGNC Symbol;Acc:HGNC:10381]	3	128619970	128681075	-1
ENSG00000162664	0.6314	6.1016	13.8907	3.77952e-12	3.35786e-11	16.9449	284695	ZNF326	zinc finger protein 326 [Source:HGNC Symbol;Acc:HGNC:14104]	1	89995112	90035531	1
ENSG00000137834	-1.8045	1.7829	-13.7913	4.34058e-12	3.81172e-11	17.7462	4091	SMAD6	SMAD family member 6 [Source:HGNC Symbol;Acc:HGNC:6772]	15	66702228	66782848	1
ENSG00000141664	-0.924534	3.49547	-13.7605	4.53126e-12	3.96815e-11	17.2996	54877	ZCCHC2	zinc finger CCHC-type containing 2 [Source:HGNC Symbol;Acc:HGNC:22916]	18	62523007	62587709	1
ENSG00000145592	0.46895	9.18689	13.7384	4.67316e-12	4.07361e-11	16.5394	6167	RPL37	ribosomal protein L37 [Source:HGNC Symbol;Acc:HGNC:10347]	5	40825262	40835335	-1
ENSG00000164062	0.471998	6.48083	13.6496	5.29327e-12	4.55557e-11	16.5589	327	APEH	acylaminoacyl-peptide hydrolase [Source:HGNC Symbol;Acc:HGNC:586]	3	49674002	49683963	1
ENSG00000167447	0.548879	5.81742	13.5685	5.93513e-12	5.03717e-11	16.5091	55181	SMG8	SMG8, nonsense mediated mRNA decay factor [Source:HGNC Symbol;Acc:HGNC:25551]	17	59209400	59215247	1
ENSG00000198824	0.546279	5.47039	13.5506	6.08751e-12	5.15266e-11	16.532	283489	CHAMP1	chromosome alignment maintaining phosphoprotein 1 [Source:HGNC Symbol;Acc:HGNC:20311]	13	114314513	114327328	1
ENSG00000137449	1.43213	1.67687	13.4594	6.928e-12	5.8071e-11	17.2208	132864	CPEB2	cytoplasmic polyadenylation element binding protein 2 [Source:HGNC Symbol;Acc:HGNC:21745]	4	15002674	15070153	1
ENSG00000129824	0.48061	7.96778	13.4479	7.04245e-12	5.89002e-11	16.1701	6192	RPS4Y1	ribosomal protein S4, Y-linked 1 [Source:HGNC Symbol;Acc:HGNC:10425]	Y	2841486	2932000	1
ENSG00000156531	0.511007	7.34547	13.439	7.13228e-12	5.95465e-11	16.1912	84295	PHF6	PHD finger protein 6 [Source:HGNC Symbol;Acc:HGNC:18145]	X	134373253	134428791	1
ENSG00000165675	0.804647	4.33244	13.3633	7.94604e-12	6.56188e-11	16.477	10495	ENOX2	ecto-NOX disulfide-thiol exchanger 2 [Source:HGNC Symbol;Acc:HGNC:2259]	X	130623369	130903317	-1
ENSG00000116918	0.536788	6.0574	13.3621	7.95994e-12	6.5705e-11	16.1753	7257	TSNAX	translin associated factor X [Source:HGNC Symbol;Acc:HGNC:12380]	1	231528653	231566524	1
ENSG00000102699	0.562491	6.00582	13.3606	7.97688e-12	6.57876e-11	16.179	143	PARP4	poly(ADP-ribose) polymerase family member 4 [Source:HGNC Symbol;Acc:HGNC:271]	13	24420926	24512810	-1
ENSG00000164338	0.725562	5.6695	13.3394	8.22359e-12	6.74413e-11	16.1908	84135	UTP15	UTP15, small subunit processome component [Source:HGNC Symbol;Acc:HGNC:25758]	5	73565443	73583377	1
ENSG00000145050	-0.683838	5.91299	-13.3019	8.67756e-12	7.0858e-11	16.1217	7873	MANF	mesencephalic astrocyte derived neurotrophic factor [Source:HGNC Symbol;Acc:HGNC:15461]	3	51385047	51389397	1
ENSG00000138757	0.465259	8.75505	13.2672	9.12148e-12	7.41321e-11	15.862	9908	G3BP2	G3BP stress granule assembly factor 2 [Source:HGNC Symbol;Acc:HGNC:30291]	4	75642782	75724525	-1
ENSG00000117597	0.776607	4.71062	13.2387	9.50442e-12	7.67512e-11	16.2092	27042	DIEXF	digestive organ expansion factor homolog (zebrafish) [Source:HGNC Symbol;Acc:HGNC:28440]	1	209828007	209857565	1
ENSG00000179950	0.527206	7.57124	13.2054	9.97178e-12	8.01841e-11	15.8299	22827	PUF60	poly(U) binding splicing factor 60 [Source:HGNC Symbol;Acc:HGNC:17042]	8	143816344	143829859	-1
ENSG00000009307	0.461777	10.0929	13.1727	1.04555e-11	8.38249e-11	15.6685	7812	CSDE1	cold shock domain containing E1 [Source:HGNC Symbol;Acc:HGNC:29905]	1	114716913	114758676	-1
ENSG00000114503	0.539915	6.92542	13.0364	1.27446e-11	1.0073e-10	15.6132	22916	NCBP2	nuclear cap binding protein subunit 2 [Source:HGNC Symbol;Acc:HGNC:7659]	3	196935402	196942597	-1
ENSG00000116001	0.48468	7.80782	13.0237	1.29846e-11	1.02372e-10	15.5425	7072	TIA1	TIA1 cytotoxic granule-associated RNA binding protein [Source:HGNC Symbol;Acc:HGNC:11802]	2	70209444	70248660	-1
ENSG00000135316	0.52411	7.94875	12.9343	1.4799e-11	1.15052e-10	15.3988	10492	SYNCRIP	synaptotagmin binding cytoplasmic RNA interacting protein [Source:HGNC Symbol;Acc:HGNC:16918]	6	85607785	85643792	-1
ENSG00000174748	0.448401	9.26558	12.9135	1.52591e-11	1.18194e-10	15.3056	6138	RPL15	ribosomal protein L15 [Source:HGNC Symbol;Acc:HGNC:10306]	3	23916545	23923692	1
ENSG00000111331	-3.45055	-0.529096	-12.8936	1.57136e-11	1.21317e-10	16.5188	4940	OAS3	2'-5'-oligoadenylate synthetase 3 [Source:HGNC Symbol;Acc:HGNC:8088]	12	112938352	112973249	1
ENSG00000128829	-0.521169	6.63586	-12.8547	1.6641e-11	1.27543e-10	15.3648	440275	EIF2AK4	eukaryotic translation initiation factor 2 alpha kinase 4 [Source:HGNC Symbol;Acc:HGNC:19687]	15	39934146	40035591	1
ENSG00000153113	0.485522	6.38078	12.8178	1.75729e-11	1.33982e-10	15.3202	831	CAST	calpastatin [Source:HGNC Symbol;Acc:HGNC:1515]	5	96525267	96779595	1
ENSG00000184343	1.95029	0.887696	12.7917	1.82653e-11	1.38982e-10	16.3624	26576	SRPK3	SRSF protein kinase 3 [Source:HGNC Symbol;Acc:HGNC:11402]	X	153776412	153785732	1
ENSG00000100207	-0.436114	6.94014	-12.7154	2.04545e-11	1.53912e-10	15.1266	6942	TCF20	transcription factor 20 [Source:HGNC Symbol;Acc:HGNC:11631]	22	42160013	42343616	-1
ENSG00000197451	0.566886	8.35043	12.6953	2.10764e-11	1.5809e-10	15.0102	3182	HNRNPAB	heterogeneous nuclear ribonucleoprotein A/B [Source:HGNC Symbol;Acc:HGNC:5034]	5	178204507	178211163	1
ENSG00000102081	-0.549753	6.00418	-12.6794	2.15818e-11	1.6137e-10	15.1593	2332	FMR1	fragile X mental retardation 1 [Source:HGNC Symbol;Acc:HGNC:3775]	X	147911951	147951125	1
ENSG00000163584	-0.825185	4.60615	-12.6608	2.21886e-11	1.65256e-10	15.3896	200916	RPL22L1	ribosomal protein L22 like 1 [Source:HGNC Symbol;Acc:HGNC:27610]	3	170864875	170870483	-1
ENSG00000174840	0.602721	4.62861	12.6514	2.25033e-11	1.67338e-10	15.3312	201626	PDE12	phosphodiesterase 12 [Source:HGNC Symbol;Acc:HGNC:25386]	3	57556276	57566844	1
ENSG00000121060	-0.788522	4.84016	-12.6479	2.26214e-11	1.68018e-10	15.3171	7706 100500827	TRIM25	tripartite motif containing 25 [Source:HGNC Symbol;Acc:HGNC:12932]	17	56887909	56914038	-1
ENSG00000110367	0.409075	8.52354	12.6323	2.31564e-11	1.71656e-10	14.9043	1656	DDX6	DEAD-box helicase 6 [Source:HGNC Symbol;Acc:HGNC:2747]	11	118747766	118791149	-1
ENSG00000196497	-0.850503	6.16347	-12.6292	2.32615e-11	1.72368e-10	15.0714	79711	IPO4	importin 4 [Source:HGNC Symbol;Acc:HGNC:19426]	14	24180219	24188964	-1
ENSG00000143633	0.732585	4.18503	12.5337	2.68469e-11	1.96102e-10	15.2477	128061	C1orf131	chromosome 1 open reading frame 131 [Source:HGNC Symbol;Acc:HGNC:25332]	1	231223763	231241187	-1
ENSG00000100129	0.394859	8.62749	12.4775	2.92186e-11	2.12201e-10	14.6577	51386	EIF3L	eukaryotic translation initiation factor 3 subunit L [Source:HGNC Symbol;Acc:HGNC:18138]	22	37848868	37889407	1
ENSG00000065183	0.575325	6.77587	12.4469	3.06019e-11	2.20811e-10	14.7128	10885	WDR3	WD repeat domain 3 [Source:HGNC Symbol;Acc:HGNC:12755]	1	117929720	117966542	1
ENSG00000070756	0.42126	7.96566	12.3974	3.29894e-11	2.36599e-10	14.565	26986 102466854	PABPC1	poly(A) binding protein cytoplasmic 1 [Source:HGNC Symbol;Acc:HGNC:8554]	8	100685816	100722809	-1
ENSG00000163565	2.01685	2.24235	12.3778	3.3984e-11	2.43272e-10	15.4948	3428	IFI16	interferon gamma inducible protein 16 [Source:HGNC Symbol;Acc:HGNC:5395]	1	158999968	159055155	1
ENSG00000117408	0.541409	5.02579	12.3077	3.7814e-11	2.67836e-10	14.7121	9670	IPO13	importin 13 [Source:HGNC Symbol;Acc:HGNC:16853]	1	43946939	43968022	1
ENSG00000182718	0.603258	6.94804	12.2183	4.33592e-11	3.04075e-10	14.3391	302	ANXA2	annexin A2 [Source:HGNC Symbol;Acc:HGNC:537]	15	60347134	60402883	-1
ENSG00000141499	-0.622031	5.00106	-12.2168	4.34536e-11	3.04625e-10	14.5985	55135	WRAP53	WD repeat containing antisense to TP53 [Source:HGNC Symbol;Acc:HGNC:25522]	17	7686071	7703502	1
ENSG00000106211	-0.952547	4.43127	-12.067	5.47465e-11	3.76013e-10	14.5	3315	HSPB1	heat shock protein family B (small) member 1 [Source:HGNC Symbol;Acc:HGNC:5246]	7	76302544	76304295	1
ENSG00000137574	0.476956	6.25078	12.0513	5.60941e-11	3.84851e-10	14.1265	96764	TGS1	trimethylguanosine synthase 1 [Source:HGNC Symbol;Acc:HGNC:17843]	8	55773142	55825448	1
ENSG00000147677	0.439602	7.71917	12.0151	5.93381e-11	4.05057e-10	13.9683	8667	EIF3H	eukaryotic translation initiation factor 3 subunit H [Source:HGNC Symbol;Acc:HGNC:3273]	8	116642130	116766925	-1
ENSG00000139233	0.628036	4.89124	12.0014	6.06177e-11	4.12605e-10	14.2486	84298	LLPH	LLP homolog, long-term synaptic facilitation [Source:HGNC Symbol;Acc:HGNC:28229]	12	66116555	66130768	-1
ENSG00000179299	-1.41217	1.86805	-11.9958	6.1151e-11	4.15937e-10	15.0105	79730	NSUN7	NOP2/Sun RNA methyltransferase family member 7 [Source:HGNC Symbol;Acc:HGNC:25857]	4	40749897	40809985	1
ENSG00000109618	0.724154	4.09307	11.9525	6.54123e-11	4.41126e-10	14.3462	51091	SEPSECS	Sep (O-phosphoserine) tRNA:Sec (selenocysteine) tRNA synthase [Source:HGNC Symbol;Acc:HGNC:30605]	4	25120014	25160442	-1
ENSG00000102053	-1.03067	2.9186	-11.9513	6.55431e-11	4.41538e-10	14.6831	340554	ZC3H12B	zinc finger CCCH-type containing 12B [Source:HGNC Symbol;Acc:HGNC:17407]	X	65366638	65507887	1
ENSG00000132275	0.623676	4.77254	11.9274	6.80314e-11	4.56356e-10	14.1532	23378	RRP8	ribosomal RNA processing 8, methyltransferase, homolog (yeast) [Source:HGNC Symbol;Acc:HGNC:29030]	11	6595075	6603620	-1
ENSG00000146676	0.456558	6.11091	11.8702	7.44006e-11	4.93844e-10	13.8475	5814 100616393	PURB	purine rich element binding protein B [Source:HGNC Symbol;Acc:HGNC:9702]	7	44876293	44885361	-1
ENSG00000185414	0.470728	6.57952	11.8379	7.82737e-11	5.17561e-10	13.7518	51263	MRPL30	mitochondrial ribosomal protein L30 [Source:HGNC Symbol;Acc:HGNC:14036]	2	99181079	99197626	1
ENSG00000100354	0.429868	6.79425	11.7683	8.73485e-11	5.69626e-10	13.6222	23112	TNRC6B	trinucleotide repeat containing 6B [Source:HGNC Symbol;Acc:HGNC:29190]	22	40044817	40335808	1
ENSG00000136104	0.679532	4.46246	11.7639	8.79527e-11	5.72976e-10	13.9538	79621	RNASEH2B	ribonuclease H2 subunit B [Source:HGNC Symbol;Acc:HGNC:25671]	13	50909678	50973745	1
ENSG00000142676	0.364676	9.491	11.7595	8.85653e-11	5.76176e-10	13.4694	6135	RPL11	ribosomal protein L11 [Source:HGNC Symbol;Acc:HGNC:10301]	1	23691779	23696425	1
ENSG00000169045	0.412043	9.80905	11.7348	9.20939e-11	5.96677e-10	13.417	3187	HNRNPH1	heterogeneous nuclear ribonucleoprotein H1 (H) [Source:HGNC Symbol;Acc:HGNC:5041]	5	179614178	179634784	-1
ENSG00000110888	0.57033	4.69922	11.7149	9.50408e-11	6.13883e-10	13.8216	65981	CAPRIN2	caprin family member 2 [Source:HGNC Symbol;Acc:HGNC:21259]	12	30709552	30754951	-1
ENSG00000100142	0.6465	4.97191	11.7137	9.5221e-11	6.14838e-10	13.7643	5435	POLR2F	RNA polymerase II subunit F [Source:HGNC Symbol;Acc:HGNC:9193]	22	37952607	38041915	1
ENSG00000149289	-0.520506	5.38873	-11.7112	9.55997e-11	6.16235e-10	13.7039	85463	ZC3H12C	zinc finger CCCH-type containing 12C [Source:HGNC Symbol;Acc:HGNC:29362]	11	110093361	110171841	1
ENSG00000148303	0.348239	9.0972	11.71	9.57884e-11	6.17242e-10	13.4034	6130	RPL7A	ribosomal protein L7a [Source:HGNC Symbol;Acc:HGNC:10364]	9	133348214	133351426	1
ENSG00000101347	0.625274	4.36609	11.6977	9.76602e-11	6.27811e-10	13.8668	25939	SAMHD1	SAM and HD domain containing deoxynucleoside triphosphate triphosphohydrolase 1 [Source:HGNC Symbol;Acc:HGNC:15925]	20	36890229	36951843	-1
ENSG00000183496	0.507557	5.41875	11.6856	9.95602e-11	6.39159e-10	13.6381	84206	MEX3B	mex-3 RNA binding family member B [Source:HGNC Symbol;Acc:HGNC:25297]	15	82041778	82046141	-1
ENSG00000144642	0.580453	5.78136	11.6649	1.02885e-10	6.58944e-10	13.5507	27303	RBMS3	RNA binding motif single stranded interacting protein 3 [Source:HGNC Symbol;Acc:HGNC:13427]	3	28574791	30010391	1
ENSG00000161642	-1.99709	1.05668	-11.6602	1.03655e-10	6.63424e-10	14.6334	25946	ZNF385A	zinc finger protein 385A [Source:HGNC Symbol;Acc:HGNC:17521]	12	54369133	54391298	-1
ENSG00000108506	0.470668	5.78406	11.6508	1.05224e-10	6.71883e-10	13.5268	57508	INTS2	integrator complex subunit 2 [Source:HGNC Symbol;Acc:HGNC:29241]	17	61865367	61928016	-1
ENSG00000065457	0.542511	5.18941	11.6498	1.05383e-10	6.7267e-10	13.6182	23536	ADAT1	adenosine deaminase, tRNA specific 1 [Source:HGNC Symbol;Acc:HGNC:228]	16	75596981	75623300	-1
ENSG00000105058	0.447023	6.50078	11.5664	1.20379e-10	7.60717e-10	13.3111	26017	FAM32A	family with sequence similarity 32 member A [Source:HGNC Symbol;Acc:HGNC:24563]	19	16185380	16192046	1
ENSG00000123200	0.746193	7.33206	11.5625	1.21131e-10	7.6496e-10	13.2481	23091	ZC3H13	zinc finger CCCH-type containing 13 [Source:HGNC Symbol;Acc:HGNC:20368]	13	45954465	46052759	-1
ENSG00000185246	0.500121	6.63479	11.5604	1.21543e-10	7.66542e-10	13.2906	55015	PRPF39	pre-mRNA processing factor 39 [Source:HGNC Symbol;Acc:HGNC:20314]	14	45084099	45116282	1
ENSG00000021776	0.402494	7.08475	11.541	1.2537e-10	7.87795e-10	13.2283	9716	AQR	aquarius intron-binding spliceosomal factor [Source:HGNC Symbol;Acc:HGNC:29513]	15	34851782	34969839	-1
ENSG00000123636	0.528167	6.81915	11.4822	1.37786e-10	8.58991e-10	13.147	29994	BAZ2B	bromodomain adjacent to zinc finger domain 2B [Source:HGNC Symbol;Acc:HGNC:963]	2	159318979	159616692	-1
ENSG00000073792	0.396213	6.34135	11.4584	1.4316e-10	8.88699e-10	13.1451	10644	IGF2BP2	insulin like growth factor 2 mRNA binding protein 2 [Source:HGNC Symbol;Acc:HGNC:28867]	3	185643739	185825056	-1
ENSG00000134698	0.605122	5.29937	11.4372	1.4813e-10	9.16554e-10	13.2459	192670	AGO4	argonaute 4, RISC catalytic component [Source:HGNC Symbol;Acc:HGNC:18424]	1	35808172	35857890	1
ENSG00000198492	0.414502	7.46371	11.317	1.79942e-10	1.09483e-09	12.8306	51441	YTHDF2	YTH N6-methyladenosine RNA binding protein 2 [Source:HGNC Symbol;Acc:HGNC:31675]	1	28736621	28769775	1
ENSG00000147274	0.392144	9.11294	11.31	1.81993e-10	1.10589e-09	12.736	27316	RBMX	RNA binding motif protein, X-linked [Source:HGNC Symbol;Acc:HGNC:9910]	X	136848004	136880764	-1
ENSG00000122034	0.509733	6.1057	11.3029	1.84127e-10	1.11742e-09	12.9074	2971	GTF3A	general transcription factor IIIA [Source:HGNC Symbol;Acc:HGNC:4662]	13	27424544	27435823	1
ENSG00000122033	0.542825	4.81787	11.285	1.89573e-10	1.14717e-09	13.0807	219402	MTIF3	mitochondrial translational initiation factor 3 [Source:HGNC Symbol;Acc:HGNC:29788]	13	27435643	27450591	-1
ENSG00000165832	0.500142	5.98057	11.2339	2.06047e-10	1.23871e-09	12.8047	142940	TRUB1	TruB pseudouridine synthase family member 1 [Source:HGNC Symbol;Acc:HGNC:16060]	10	114938193	114977676	1
ENSG00000100823	0.478873	7.1893	11.2308	2.07069e-10	1.24353e-09	12.7007	328	APEX1	apurinic/apyrimidinic endodeoxyribonuclease 1 [Source:HGNC Symbol;Acc:HGNC:587]	14	20455191	20457772	1
ENSG00000115524	0.376254	9.50153	11.1655	2.30443e-10	1.37097e-09	12.4758	23451	SF3B1	splicing factor 3b subunit 1 [Source:HGNC Symbol;Acc:HGNC:10768]	2	197389784	197435091	-1
ENSG00000105372	0.385117	8.91027	11.1498	2.36488e-10	1.40157e-09	12.4725	6223	RPS19	ribosomal protein S19 [Source:HGNC Symbol;Acc:HGNC:10402]	19	41859918	41872926	1
ENSG00000199568	-1.27496	2.57995	-11.1447	2.38451e-10	1.41232e-09	13.4499	26831	RNU5A-1	RNA, U5A small nuclear 1 [Source:HGNC Symbol;Acc:HGNC:10211]	15	65296051	65296166	1
ENSG00000010244	0.390132	8.4303	11.1338	2.42758e-10	1.4347e-09	12.4677	7756 693217	ZNF207	zinc finger protein 207 [Source:HGNC Symbol;Acc:HGNC:12998]	17	32350109	32381886	1
ENSG00000196141	-1.02328	4.25047	-11.1283	2.44958e-10	1.44635e-09	12.9938	26010	SPATS2L	spermatogenesis associated serine rich 2 like [Source:HGNC Symbol;Acc:HGNC:24574]	2	200305881	200482263	1
ENSG00000189060	-0.921295	4.09108	-11.1058	2.54231e-10	1.49691e-09	12.9879	3005	H1F0	H1 histone family member 0 [Source:HGNC Symbol;Acc:HGNC:4714]	22	37805093	37807436	1
ENSG00000152518	-0.850712	3.45972	-11.105	2.54551e-10	1.49833e-09	13.1383	678	ZFP36L2	ZFP36 ring finger protein like 2 [Source:HGNC Symbol;Acc:HGNC:1108]	2	43222402	43226609	-1
ENSG00000076067	0.653392	4.61052	11.0966	2.58091e-10	1.51729e-09	12.805	5939	RBMS2	RNA binding motif single stranded interacting protein 2 [Source:HGNC Symbol;Acc:HGNC:9909]	12	56521929	56596196	1
ENSG00000117523	0.36437	8.10427	11.0713	2.69099e-10	1.57468e-09	12.3777	23215	PRRC2C	proline rich coiled-coil 2C [Source:HGNC Symbol;Acc:HGNC:24903]	1	171485551	171593511	1
ENSG00000135387	0.367361	9.59145	11.0492	2.79086e-10	1.6271e-09	12.2736	4076	CAPRIN1	cell cycle associated protein 1 [Source:HGNC Symbol;Acc:HGNC:6743]	11	34051683	34101156	1
ENSG00000155846	-1.46808	2.05446	-11.022	2.91951e-10	1.69482e-09	13.3737	133522	PPARGC1B	PPARG coactivator 1 beta [Source:HGNC Symbol;Acc:HGNC:30022]	5	149730298	149855022	1
ENSG00000105793	0.585701	4.87881	11.0195	2.93179e-10	1.70039e-09	12.6162	85865 101927446	GTPBP10	GTP binding protein 10 [Source:HGNC Symbol;Acc:HGNC:25106]	7	90335223	90391455	1
ENSG00000136527	0.431136	8.78753	10.9754	3.15417e-10	1.8188e-09	12.1789	6434	TRA2B	transformer 2 beta homolog (Drosophila) [Source:HGNC Symbol;Acc:HGNC:10781]	3	185915906	185938136	-1
ENSG00000106344	0.427645	6.4064	10.9478	3.30252e-10	1.8957e-09	12.2717	55131	RBM28	RNA binding motif protein 28 [Source:HGNC Symbol;Acc:HGNC:21863]	7	128297685	128343908	-1
ENSG00000147140	0.332892	9.43653	10.9031	3.55757e-10	2.02922e-09	12.0275	4841	NONO	non-POU domain containing, octamer-binding [Source:HGNC Symbol;Acc:HGNC:7871]	X	71283192	71301168	1
ENSG00000206503	-0.46442	5.51107	-10.9026	3.56088e-10	2.03049e-09	12.3173	3105	HLA-A	major histocompatibility complex, class I, A [Source:HGNC Symbol;Acc:HGNC:4931]	6	29941260	29945884	1
ENSG00000173914	0.455345	5.77136	10.8637	3.8e-10	2.1539e-09	12.1961	83759	RBM4B	RNA binding motif protein 4B [Source:HGNC Symbol;Acc:HGNC:28842]	11	66664998	66677921	-1
ENSG00000041802	0.476573	5.93967	10.8135	4.13328e-10	2.33097e-09	12.0874	55341	LSG1	large 60S subunit nuclear export GTPase 1 [Source:HGNC Symbol;Acc:HGNC:25652]	3	194640788	194672477	-1
ENSG00000165494	0.39599	7.07707	10.7975	4.24585e-10	2.38807e-09	11.9626	51585	PCF11	PCF11 cleavage and polyadenylation factor subunit [Source:HGNC Symbol;Acc:HGNC:30097]	11	83156988	83187451	1
ENSG00000099821	-0.714828	4.61561	-10.7939	4.27191e-10	2.40201e-09	12.3153	5442	POLRMT	RNA polymerase mitochondrial [Source:HGNC Symbol;Acc:HGNC:9200]	19	617224	633604	-1
ENSG00000138646	1.74796	0.801956	10.7861	4.32792e-10	2.42919e-09	13.1597	51191	HERC5	HECT and RLD domain containing E3 ubiquitin protein ligase 5 [Source:HGNC Symbol;Acc:HGNC:24368]	4	88457117	88506163	1
ENSG00000172346	-1.40241	1.98307	-10.7815	4.36149e-10	2.44586e-09	12.9733	27254	CSDC2	cold shock domain containing C2 [Source:HGNC Symbol;Acc:HGNC:30359]	22	41560763	41577741	1
ENSG00000107164	0.377	6.65905	10.7563	4.55106e-10	2.5439e-09	11.9186	8939	FUBP3	far upstream element binding protein 3 [Source:HGNC Symbol;Acc:HGNC:4005]	9	130578965	130638352	1
ENSG00000005436	0.439737	5.47063	10.7313	4.74656e-10	2.63919e-09	12.0095	6936	GCFC2	GC-rich sequence DNA-binding factor 2 [Source:HGNC Symbol;Acc:HGNC:1317]	2	75652000	75710989	-1
ENSG00000005100	0.679093	5.52714	10.7154	4.87584e-10	2.70631e-09	11.9732	56919	DHX33	DEAH-box helicase 33 [Source:HGNC Symbol;Acc:HGNC:16718]	17	5440912	5469060	-1
ENSG00000198015	0.386671	7.60041	10.6866	5.11926e-10	2.82984e-09	11.7378	28977	MRPL42	mitochondrial ribosomal protein L42 [Source:HGNC Symbol;Acc:HGNC:14493]	12	93467488	93516213	1
ENSG00000131504	0.436264	6.28972	10.6851	5.13266e-10	2.83476e-09	11.8249	1729	DIAPH1	diaphanous related formin 1 [Source:HGNC Symbol;Acc:HGNC:2876]	5	141515016	141619055	-1
ENSG00000112739	0.420448	7.30977	10.6852	5.13189e-10	2.83476e-09	11.7518	8899	PRPF4B	pre-mRNA processing factor 4B [Source:HGNC Symbol;Acc:HGNC:17346]	6	4021267	4064983	1
ENSG00000117174	0.554021	5.22589	10.6626	5.33223e-10	2.93389e-09	11.9301	54680	ZNHIT6	zinc finger HIT-type containing 6 [Source:HGNC Symbol;Acc:HGNC:26089]	1	85649423	85708433	-1
ENSG00000178694	0.520086	4.54563	10.6314	5.62181e-10	3.07983e-09	12.0125	63899	NSUN3	NOP2/Sun RNA methyltransferase family member 3 [Source:HGNC Symbol;Acc:HGNC:26208]	3	94062916	94128545	1
ENSG00000166783	0.475553	5.57203	10.623	5.70233e-10	3.11943e-09	11.8036	9665 102465252	KIAA0430	KIAA0430 [Source:HGNC Symbol;Acc:HGNC:29562]	16	15594386	15643166	-1
ENSG00000121774	0.380865	8.1192	10.5899	6.03326e-10	3.28531e-09	11.539	10657	KHDRBS1	KH RNA binding domain containing, signal transduction associated 1 [Source:HGNC Symbol;Acc:HGNC:18116]	1	32013829	32060850	1
ENSG00000104907	-0.635316	4.73081	-10.5682	6.26043e-10	3.39441e-09	11.8899	55621	TRMT1	tRNA methyltransferase 1 [Source:HGNC Symbol;Acc:HGNC:25980]	19	13104902	13117567	-1
ENSG00000143493	0.483678	6.00202	10.5625	6.32143e-10	3.42552e-09	11.6392	25896	INTS7	integrator complex subunit 7 [Source:HGNC Symbol;Acc:HGNC:24484]	1	211940399	212035542	-1
ENSG00000125651	-0.360071	6.49876	-10.5446	6.51761e-10	3.52083e-09	11.5655	2962	GTF2F1	general transcription factor IIF subunit 1 [Source:HGNC Symbol;Acc:HGNC:4652]	19	6379569	6393981	-1
ENSG00000089009	0.357178	8.02283	10.5373	6.60007e-10	3.56329e-09	11.4511	6128	RPL6	ribosomal protein L6 [Source:HGNC Symbol;Acc:HGNC:10362]	12	112405190	112418838	-1
ENSG00000185745	-1.15844	2.81052	-10.5353	6.62209e-10	3.57314e-09	12.3328	3434	IFIT1	interferon induced protein with tetratricopeptide repeats 1 [Source:HGNC Symbol;Acc:HGNC:5407]	10	89392546	89406486	1
ENSG00000137760	0.613811	4.61088	10.4901	7.15504e-10	3.83455e-09	11.7482	91801	ALKBH8	alkB homolog 8, tRNA methyltransferase [Source:HGNC Symbol;Acc:HGNC:25189]	11	107502726	107565746	-1
ENSG00000005022	0.357346	8.4166	10.4705	7.3998e-10	3.95455e-09	11.3119	292	SLC25A5	solute carrier family 25 member 5 [Source:HGNC Symbol;Acc:HGNC:10991]	X	119468400	119471319	1
ENSG00000061936	0.385337	6.16273	10.4329	7.89453e-10	4.19649e-09	11.3912	6433	SFSWAP	splicing factor SWAP homolog [Source:HGNC Symbol;Acc:HGNC:10790]	12	131711081	131799737	1
ENSG00000165119	0.371131	9.27582	10.3961	8.41087e-10	4.45225e-09	11.1408	3190 407043	HNRNPK	heterogeneous nuclear ribonucleoprotein K [Source:HGNC Symbol;Acc:HGNC:5044]	9	83968083	83980616	-1
ENSG00000100109	0.395394	5.97746	10.3236	9.53505e-10	4.99714e-09	11.216	24144	TFIP11	tuftelin interacting protein 11 [Source:HGNC Symbol;Acc:HGNC:17165]	22	26491225	26512505	-1
ENSG00000164985	-0.356412	7.56202	-10.3056	9.83655e-10	5.14379e-09	11.0666	11168	PSIP1	PC4 and SFRS1 interacting protein 1 [Source:HGNC Symbol;Acc:HGNC:9527]	9	15464066	15511019	-1
ENSG00000108312	0.445356	7.31178	10.2814	1.02587e-09	5.34541e-09	11.0332	7343	UBTF	upstream binding transcription factor, RNA polymerase I [Source:HGNC Symbol;Acc:HGNC:12511]	17	44205033	44221626	-1
ENSG00000125691	0.384062	9.08728	10.2737	1.03983e-09	5.40925e-09	10.9283	9349	RPL23	ribosomal protein L23 [Source:HGNC Symbol;Acc:HGNC:10316]	17	38847865	38853843	-1
ENSG00000196262	0.397419	8.38378	10.2427	1.09736e-09	5.67892e-09	10.9047	5478	PPIA	peptidylprolyl isomerase A [Source:HGNC Symbol;Acc:HGNC:9253]	7	44796680	44824564	1
ENSG00000149100	0.389247	7.727	10.2281	1.12577e-09	5.81645e-09	10.9134	10480	EIF3M	eukaryotic translation initiation factor 3 subunit M [Source:HGNC Symbol;Acc:HGNC:24460]	11	32583798	32606262	1
ENSG00000116251	0.341635	7.53907	10.2261	1.12964e-09	5.83326e-09	10.9206	6146	RPL22	ribosomal protein L22 [Source:HGNC Symbol;Acc:HGNC:10315]	1	6181269	6209389	-1
ENSG00000145741	0.346353	7.76097	10.211	1.15993e-09	5.97667e-09	10.8807	689	BTF3	basic transcription factor 3 [Source:HGNC Symbol;Acc:HGNC:1125]	5	73498408	73505635	1
ENSG00000143569	0.356472	7.46997	10.1777	1.2294e-09	6.31232e-09	10.8367	9898	UBAP2L	ubiquitin associated protein 2 like [Source:HGNC Symbol;Acc:HGNC:29877]	1	154220179	154271510	1
ENSG00000004478	-0.59858	6.18827	-10.0784	1.46376e-09	7.41729e-09	10.7625	2288	FKBP4	FK506 binding protein 4 [Source:HGNC Symbol;Acc:HGNC:3720]	12	2794953	2805423	1
ENSG00000149531	1.043	2.40092	10.0717	1.481e-09	7.49762e-09	11.5454		FRG1BP	FSHD region gene 1 family member B, pseudogene [Source:HGNC Symbol;Acc:HGNC:15792]	20	30377372	30399257	1
ENSG00000112081	0.369799	8.91811	10.044	1.55522e-09	7.84722e-09	10.5181	6428	SRSF3	serine and arginine rich splicing factor 3 [Source:HGNC Symbol;Acc:HGNC:10785]	6	36594353	36605600	1
ENSG00000137547	0.466753	5.55438	10.0189	1.62595e-09	8.16288e-09	10.7203	29088	MRPL15	mitochondrial ribosomal protein L15 [Source:HGNC Symbol;Acc:HGNC:14054]	8	54135210	54147901	1
ENSG00000100201	0.32678	10.0142	10.0045	1.66772e-09	8.3477e-09	10.4037	10521	DDX17	DEAD-box helicase 17 [Source:HGNC Symbol;Acc:HGNC:2740]	22	38483440	38507660	-1
ENSG00000184924	0.519329	4.67199	9.95238	1.8294e-09	9.06909e-09	10.7627	391356	PTRHD1	peptidyl-tRNA hydrolase domain containing 1 [Source:HGNC Symbol;Acc:HGNC:33782]	2	24789734	24793382	-1
ENSG00000171863	0.352692	6.94119	9.94965	1.83828e-09	9.10839e-09	10.4517	6201	RPS7	ribosomal protein S7 [Source:HGNC Symbol;Acc:HGNC:10440]	2	3575205	3580919	1
ENSG00000056586	0.333548	7.31774	9.94241	1.86209e-09	9.20709e-09	10.4153	54542	RC3H2	ring finger and CCCH-type domains 2 [Source:HGNC Symbol;Acc:HGNC:21461]	9	122844556	122905341	-1
ENSG00000182899	0.353982	8.48067	9.90502	1.9903e-09	9.79001e-09	10.2828	6165	RPL35A	ribosomal protein L35a [Source:HGNC Symbol;Acc:HGNC:10345]	3	197949987	197956610	1
ENSG00000008988	0.325696	8.63901	9.87597	2.09618e-09	1.0263e-08	10.2215	6224	RPS20	ribosomal protein S20 [Source:HGNC Symbol;Acc:HGNC:10405]	8	56067295	56074581	-1
ENSG00000103248	0.603463	4.10434	9.87038	2.11722e-09	1.03526e-08	10.7427	64779	MTHFSD	methenyltetrahydrofolate synthetase domain containing [Source:HGNC Symbol;Acc:HGNC:25778]	16	86530176	86555235	-1
ENSG00000089737	0.340496	7.49555	9.85505	2.17607e-09	1.06212e-08	10.2435	57062	DDX24	DEAD-box helicase 24 [Source:HGNC Symbol;Acc:HGNC:13266]	14	94048291	94081245	-1
ENSG00000161813	0.399051	6.95423	9.85319	2.1833e-09	1.06456e-08	10.2725	113251	LARP4	La ribonucleoprotein domain family member 4 [Source:HGNC Symbol;Acc:HGNC:24320]	12	50392383	50480004	1
ENSG00000135829	0.341482	9.65212	9.85	2.19581e-09	1.07038e-08	10.1316	1660	DHX9	DEAH-box helicase 9 [Source:HGNC Symbol;Acc:HGNC:2750]	1	182839369	182887751	1
ENSG00000077312	-0.411877	6.57513	-9.82623	2.2913e-09	1.11093e-08	10.2566	6626	SNRPA	small nuclear ribonucleoprotein polypeptide A [Source:HGNC Symbol;Acc:HGNC:11151]	19	40750637	40765389	1
ENSG00000151806	0.438557	5.9181	9.82214	2.30815e-09	1.11796e-08	10.3071	60558	GUF1	GUF1 homolog, GTPase [Source:HGNC Symbol;Acc:HGNC:25799]	4	44678427	44700926	1
ENSG00000206557	0.573371	7.82331	9.80961	2.36062e-09	1.14075e-08	10.1398	131405	TRIM71	tripartite motif containing 71 [Source:HGNC Symbol;Acc:HGNC:32669]	3	32818018	32897826	1
ENSG00000168827	0.409356	5.89926	9.79978	2.4026e-09	1.15957e-08	10.268	85476	GFM1	G elongation factor mitochondrial 1 [Source:HGNC Symbol;Acc:HGNC:13780]	3	158644278	158692575	1
ENSG00000153250	0.382682	6.77346	9.79567	2.42042e-09	1.16757e-08	10.1778	5937 100616364	RBMS1	RNA binding motif single stranded interacting protein 1 [Source:HGNC Symbol;Acc:HGNC:9907]	2	160272151	160493794	-1
ENSG00000111615	0.420994	6.58606	9.77727	2.50181e-09	1.20316e-08	10.1573	11103	KRR1	KRR1, small subunit processome component homolog [Source:HGNC Symbol;Acc:HGNC:5176]	12	75490861	75511636	-1
ENSG00000160710	0.286446	8.61124	9.77061	2.53191e-09	1.21641e-08	10.0272	103	ADAR	adenosine deaminase, RNA specific [Source:HGNC Symbol;Acc:HGNC:225]	1	154582062	154627999	-1
ENSG00000163577	0.717389	4.09533	9.75834	2.58848e-09	1.24201e-08	10.5372	56648	EIF5A2	eukaryotic translation initiation factor 5A2 [Source:HGNC Symbol;Acc:HGNC:3301]	3	170888415	170908693	-1
ENSG00000186834	0.468201	4.90071	9.73353	2.70682e-09	1.29421e-08	10.3092	10614	HEXIM1	hexamethylene bisacetamide inducible 1 [Source:HGNC Symbol;Acc:HGNC:24953]	17	45148502	45152101	1
ENSG00000136450	0.412777	9.66246	9.73038	2.72223e-09	1.3006e-08	9.90827	6426	SRSF1	serine and arginine rich splicing factor 1 [Source:HGNC Symbol;Acc:HGNC:10780]	17	58003360	58007346	-1
ENSG00000213246	0.416872	5.50726	9.73019	2.72313e-09	1.3007e-08	10.1935	6827	SUPT4H1	SPT4 homolog, DSIF elongation factor subunit [Source:HGNC Symbol;Acc:HGNC:11467]	17	58345175	58353093	-1
ENSG00000152684	0.492908	5.12489	9.72843	2.73182e-09	1.30452e-08	10.2559	53918	PELO	pelota homolog (Drosophila) [Source:HGNC Symbol;Acc:HGNC:8829]	5	52787940	52804046	1
ENSG00000181991	0.461775	5.08422	9.718	2.78371e-09	1.32696e-08	10.2442	64963	MRPS11	mitochondrial ribosomal protein S11 [Source:HGNC Symbol;Acc:HGNC:14050]	15	88467453	88480773	1
ENSG00000180574	0.355948	7.15334	9.6798	2.9827e-09	1.41471e-08	9.93691		EIF2S3L	Putative eukaryotic translation initiation factor 2 subunit 3-like protein [Source:UniProtKB/Swiss-Prot;Acc:Q2VIR3]	12	10505602	10523135	1
ENSG00000116830	0.352229	6.52267	9.66266	3.07672e-09	1.4535e-08	9.94824	8458	TTF2	transcription termination factor 2 [Source:HGNC Symbol;Acc:HGNC:12398]	1	117060303	117107453	1
ENSG00000178718	-1.0134	2.77009	-9.65804	3.10262e-09	1.46427e-08	10.7415	54913	RPP25	ribonuclease P/MRP subunit p25 [Source:HGNC Symbol;Acc:HGNC:30361]	15	74954416	74957464	-1
ENSG00000188846	0.341369	8.03885	9.59042	3.5081e-09	1.64297e-08	9.71853	9045	RPL14	ribosomal protein L14 [Source:HGNC Symbol;Acc:HGNC:10305]	3	40457292	40468587	1
ENSG00000130741	0.323028	8.01986	9.57852	3.58497e-09	1.67649e-08	9.69717	1968	EIF2S3	eukaryotic translation initiation factor 2 subunit gamma [Source:HGNC Symbol;Acc:HGNC:3267]	X	24054716	24077971	1
ENSG00000090861	-0.325886	6.91869	-9.54547	3.80779e-09	1.77239e-08	9.70331	16	AARS	alanyl-tRNA synthetase [Source:HGNC Symbol;Acc:HGNC:20]	16	70252295	70289543	-1
ENSG00000145425	0.389132	6.47692	9.52942	3.92108e-09	1.82289e-08	9.70075	6189	RPS3A	ribosomal protein S3A [Source:HGNC Symbol;Acc:HGNC:10421]	4	151099573	151104652	1
ENSG00000240563	0.939356	4.52185	9.52882	3.92543e-09	1.8237e-08	10.0084	54596	L1TD1	LINE1 type transposase domain containing 1 [Source:HGNC Symbol;Acc:HGNC:25595]	1	62194831	62212328	1
ENSG00000159840	-0.77926	4.50887	-9.52465	3.95547e-09	1.83708e-08	10.0392	7791	ZYX	zyxin [Source:HGNC Symbol;Acc:HGNC:13200]	7	143381080	143391111	1
ENSG00000185624	-0.338151	8.19439	-9.52145	3.97864e-09	1.84739e-08	9.58333	5034	P4HB	prolyl 4-hydroxylase subunit beta [Source:HGNC Symbol;Acc:HGNC:8548]	17	81843159	81860694	-1
ENSG00000125844	-0.483071	6.97034	-9.43694	4.64579e-09	2.12646e-08	9.49546	6238	RRBP1	ribosome binding protein 1 [Source:HGNC Symbol;Acc:HGNC:10448]	20	17613678	17682295	-1
ENSG00000109819	-5.58452	-0.0859323	-9.43465	4.66541e-09	2.1339e-08	10.9816	10891	PPARGC1A	PPARG coactivator 1 alpha [Source:HGNC Symbol;Acc:HGNC:9237]	4	23755041	23904089	-1
ENSG00000115421	0.44701	5.36742	9.43056	4.70069e-09	2.14848e-08	9.65116	64895	PAPOLG	poly(A) polymerase gamma [Source:HGNC Symbol;Acc:HGNC:14982]	2	60756230	60802085	1
ENSG00000188573	-2.14649	0.650099	-9.42274	4.76886e-09	2.17597e-08	10.8202		FBLL1	fibrillarin-like 1 [Source:HGNC Symbol;Acc:HGNC:35458]	5	168529116	168530634	1
ENSG00000003756	0.366675	7.53695	9.41904	4.80146e-09	2.18927e-08	9.42123	10181	RBM5	RNA binding motif protein 5 [Source:HGNC Symbol;Acc:HGNC:9902]	3	50088908	50119021	1
ENSG00000151846	0.504253	5.30718	9.41432	4.84337e-09	2.20731e-08	9.63033	5042	PABPC3	poly(A) binding protein cytoplasmic 3 [Source:HGNC Symbol;Acc:HGNC:8556]	13	25095868	25099254	1
ENSG00000169813	0.378007	7.52814	9.41315	4.85382e-09	2.21155e-08	9.41045	3185	HNRNPF	heterogeneous nuclear ribonucleoprotein F [Source:HGNC Symbol;Acc:HGNC:5039]	10	43385617	43409166	-1
ENSG00000184083	0.714186	3.6146	9.37339	5.22323e-09	2.36679e-08	9.93166	54954	FAM120C	family with sequence similarity 120C [Source:HGNC Symbol;Acc:HGNC:16949]	X	54068324	54183281	-1
ENSG00000224470	0.355558	6.18063	9.29568	6.03182e-09	2.69495e-08	9.28286	342371	ATXN1L	ataxin 1 like [Source:HGNC Symbol;Acc:HGNC:33279]	16	71845991	71885268	1
ENSG00000163950	0.495401	6.08603	9.26737	6.35776e-09	2.82688e-08	9.23834	7884	SLBP	stem-loop binding protein [Source:HGNC Symbol;Acc:HGNC:10904]	4	1692800	1712555	-1
ENSG00000147669	0.481133	5.29349	9.26549	6.38007e-09	2.83613e-08	9.3476	5440	POLR2K	RNA polymerase II subunit K [Source:HGNC Symbol;Acc:HGNC:9198]	8	100150584	100154002	1
ENSG00000075292	0.500105	7.84203	9.23515	6.75101e-09	2.98518e-08	9.05079	27332	ZNF638	zinc finger protein 638 [Source:HGNC Symbol;Acc:HGNC:17894]	2	71276561	71435069	1
ENSG00000213339	-0.514885	4.57634	-9.23264	6.78268e-09	2.99755e-08	9.45289	81890	QTRT1	queuine tRNA-ribosyltransferase catalytic subunit 1 [Source:HGNC Symbol;Acc:HGNC:23797]	19	10701430	10713437	1
ENSG00000137411	-0.388276	5.34085	-9.22385	6.8949e-09	3.04431e-08	9.27416	57176	VARS2	valyl-tRNA synthetase 2, mitochondrial [Source:HGNC Symbol;Acc:HGNC:21642]	6	30908242	30926459	1
ENSG00000269190	0.901619	2.50335	9.20255	7.17462e-09	3.15607e-08	9.89255	115290	FBXO17	F-box protein 17 [Source:HGNC Symbol;Acc:HGNC:18754]	19	38941401	38975910	-1
ENSG00000198034	0.290297	9.25596	9.19491	7.27784e-09	3.19629e-08	8.90566	6191	RPS4X	ribosomal protein S4, X-linked [Source:HGNC Symbol;Acc:HGNC:10424]	X	72255679	72277300	-1
ENSG00000108298	0.312403	9.15085	9.18032	7.47923e-09	3.27866e-08	8.88155	6143	RPL19	ribosomal protein L19 [Source:HGNC Symbol;Acc:HGNC:10312]	17	39200283	39204727	1
ENSG00000164548	0.41581	6.07323	9.15866	7.78886e-09	3.40417e-08	9.02977	29896	TRA2A	transformer 2 alpha homolog [Source:HGNC Symbol;Acc:HGNC:16645]	7	23504780	23532041	-1
ENSG00000174720	0.413479	6.14789	9.14616	7.97358e-09	3.4785e-08	8.99726	51574	LARP7	La ribonucleoprotein domain family member 7 [Source:HGNC Symbol;Acc:HGNC:24912]	4	112636964	112657592	1
ENSG00000139793	0.489138	5.03038	9.14116	8.04866e-09	3.50964e-08	9.15587	10150	MBNL2	muscleblind like splicing regulator 2 [Source:HGNC Symbol;Acc:HGNC:16746]	13	97221434	97394120	1
ENSG00000140694	0.449826	5.27243	9.13596	8.1276e-09	3.53675e-08	9.10098	5073	PARN	poly(A)-specific ribonuclease [Source:HGNC Symbol;Acc:HGNC:8609]	16	14435701	14632728	-1
ENSG00000265241	0.362701	6.79363	9.11612	8.43628e-09	3.65848e-08	8.88367	9939	RBM8A	RNA binding motif protein 8A [Source:HGNC Symbol;Acc:HGNC:9905]	1	145917714	145927678	-1
ENSG00000125944	0.338504	8.99881	9.1108	8.52102e-09	3.69102e-08	8.75282	10236	HNRNPR	heterogeneous nuclear ribonucleoprotein R [Source:HGNC Symbol;Acc:HGNC:5047]	1	23303771	23344336	-1
ENSG00000121486	0.408885	5.1766	9.05477	9.46959e-09	4.06847e-08	8.96038	81627	TRMT1L	tRNA methyltransferase 1 like [Source:HGNC Symbol;Acc:HGNC:16782]	1	185118098	185157072	-1
ENSG00000162244	0.292989	8.22893	9.04819	9.58801e-09	4.11283e-08	8.66769	6159	RPL29	ribosomal protein L29 [Source:HGNC Symbol;Acc:HGNC:10331]	3	51993600	51995942	-1
ENSG00000165055	0.379246	5.87148	9.0451	9.64419e-09	4.13319e-08	8.83294	55798	METTL2B	methyltransferase like 2B [Source:HGNC Symbol;Acc:HGNC:18272]	7	128476729	128506602	1
ENSG00000132953	0.439565	7.05419	9.04517	9.64286e-09	4.13319e-08	8.72798	64328	XPO4	exportin 4 [Source:HGNC Symbol;Acc:HGNC:17796]	13	20777329	20903048	-1
ENSG00000253797	0.345584	6.31215	9.00841	1.03369e-08	4.40521e-08	8.71243	9724	UTP14C	UTP14, small subunit processome component homolog C (S. cerevisiae) [Source:HGNC Symbol;Acc:HGNC:20321]	13	52024691	52033600	1
ENSG00000130935	0.433353	7.17434	8.98716	1.07617e-08	4.57173e-08	8.60699	25926	NOL11	nucleolar protein 11 [Source:HGNC Symbol;Acc:HGNC:24557]	17	67717833	67744531	1
ENSG00000156482	0.297033	8.64256	8.97725	1.09659e-08	4.64198e-08	8.50794	6156	RPL30	ribosomal protein L30 [Source:HGNC Symbol;Acc:HGNC:10333]	8	98024851	98046469	-1
ENSG00000134697	0.403786	6.7252	8.95509	1.1437e-08	4.81455e-08	8.57359	29889	GNL2	G protein nucleolar 2 [Source:HGNC Symbol;Acc:HGNC:29925]	1	37566816	37595935	-1
ENSG00000188917	0.653515	3.72574	8.93868	1.17996e-08	4.95002e-08	9.06175	79979	TRMT2B	tRNA methyltransferase 2 homolog B [Source:HGNC Symbol;Acc:HGNC:25748]	X	101009346	101052116	-1
ENSG00000254772	0.323763	8.8342	8.93441	1.18957e-08	4.98662e-08	8.4148	1937	EEF1G	eukaryotic translation elongation factor 1 gamma [Source:HGNC Symbol;Acc:HGNC:3213]	11	62559601	62574086	-1
ENSG00000177679	-2.30971	-0.749852	-8.91166	1.24224e-08	5.18678e-08	10.007	222183	SRRM3	serine/arginine repetitive matrix 3 [Source:HGNC Symbol;Acc:HGNC:26729]	7	76201900	76287288	1
ENSG00000105321	-0.69943	3.19006	-8.89092	1.29235e-08	5.38419e-08	9.14418	26093	CCDC9	coiled-coil domain containing 9 [Source:HGNC Symbol;Acc:HGNC:24560]	19	47255980	47271953	1
ENSG00000198563	0.278368	8.84217	8.89042	1.2936e-08	5.3882e-08	8.32786	7919	DDX39B	DEAD-box helicase 39B [Source:HGNC Symbol;Acc:HGNC:13917]	6	31530219	31542448	-1
ENSG00000088205	0.441515	7.10984	8.8692	1.34708e-08	5.59379e-08	8.37871	8886	DDX18	DEAD-box helicase 18 [Source:HGNC Symbol;Acc:HGNC:2741]	2	117814650	117832379	1
ENSG00000119616	0.430099	5.16806	8.85259	1.39057e-08	5.75926e-08	8.56463	51077	FCF1	FCF1 rRNA-processing protein [Source:HGNC Symbol;Acc:HGNC:20220]	14	74713144	74738620	1
ENSG00000150459	0.324541	6.72328	8.84702	1.40545e-08	5.81581e-08	8.36082	10284	SAP18	Sin3A associated protein 18 [Source:HGNC Symbol;Acc:HGNC:10530]	13	21140514	21149084	1
ENSG00000130348	0.450827	5.33664	8.8466	1.40659e-08	5.81925e-08	8.52265	55278	QRSL1	glutaminyl-tRNA synthase (glutamine-hydrolyzing)-like 1 [Source:HGNC Symbol;Acc:HGNC:21020]	6	106629578	106668417	1
ENSG00000135930	0.319421	6.47049	8.84	1.42447e-08	5.88938e-08	8.36662	9470	EIF4E2	eukaryotic translation initiation factor 4E family member 2 [Source:HGNC Symbol;Acc:HGNC:3293]	2	232550052	232583644	1
ENSG00000175387	0.323203	7.80288	8.83015	1.45162e-08	5.99116e-08	8.26157	4087	SMAD2	SMAD family member 2 [Source:HGNC Symbol;Acc:HGNC:6768]	18	47808957	47931146	-1
ENSG00000135482	0.425395	4.66651	8.81724	1.48799e-08	6.13061e-08	8.59638	84872	ZC3H10	zinc finger CCCH-type containing 10 [Source:HGNC Symbol;Acc:HGNC:25893]	12	56118159	56127514	1
ENSG00000130332	0.448551	5.84551	8.80386	1.52668e-08	6.28321e-08	8.36111	51690	LSM7	LSM7 homolog, U6 small nuclear RNA and mRNA degradation associated [Source:HGNC Symbol;Acc:HGNC:20470]	19	2321517	2328620	-1
ENSG00000174953	0.365177	6.52772	8.78109	1.59494e-08	6.54414e-08	8.24487	170506	DHX36	DEAH-box helicase 36 [Source:HGNC Symbol;Acc:HGNC:14410]	3	154272546	154324497	-1
ENSG00000120727	0.394363	5.90255	8.77697	1.60762e-08	6.58914e-08	8.30061	51247	PAIP2	poly(A) binding protein interacting protein 2 [Source:HGNC Symbol;Acc:HGNC:17970]	5	139341587	139369720	1
ENSG00000119314	-0.356439	7.04533	-8.74787	1.70023e-08	6.94924e-08	8.14687	9991	PTBP3	polypyrimidine tract binding protein 3 [Source:HGNC Symbol;Acc:HGNC:10253]	9	112217716	112333667	-1
ENSG00000087995	0.361506	5.18684	8.74587	1.7068e-08	6.9716e-08	8.3498	339175	METTL2A	methyltransferase like 2A [Source:HGNC Symbol;Acc:HGNC:25755]	17	62423867	62450822	1
ENSG00000013364	0.82905	2.38004	8.74419	1.71235e-08	6.98975e-08	9.02872	9961	MVP	major vault protein [Source:HGNC Symbol;Acc:HGNC:7531]	16	29820394	29848039	1
ENSG00000168003	-0.456524	6.873	-8.74373	1.71387e-08	6.99444e-08	8.15139	6520	SLC3A2	solute carrier family 3 member 2 [Source:HGNC Symbol;Acc:HGNC:11026]	11	62856102	62888875	1
ENSG00000106638	-0.3721	5.2452	-8.73938	1.7283e-08	7.04728e-08	8.34072	26608	TBL2	transducin beta like 2 [Source:HGNC Symbol;Acc:HGNC:11586]	7	73568932	73578791	-1
ENSG00000187742	0.321412	6.63496	8.73605	1.73941e-08	7.08953e-08	8.14689	79048	SECISBP2	SECIS binding protein 2 [Source:HGNC Symbol;Acc:HGNC:30972]	9	89318506	89359662	1
ENSG00000189403	0.354284	8.17679	8.68633	1.91474e-08	7.75251e-08	7.95482	3146	HMGB1	high mobility group box 1 [Source:HGNC Symbol;Acc:HGNC:4983]	13	30456704	30617597	-1
ENSG00000116754	0.323712	7.73779	8.68279	1.92792e-08	7.79921e-08	7.9718	9295	SRSF11	serine and arginine rich splicing factor 11 [Source:HGNC Symbol;Acc:HGNC:10782]	1	70205682	70253052	1
ENSG00000139746	0.349331	7.05343	8.67086	1.97294e-08	7.96775e-08	7.98804	64062	RBM26	RNA binding motif protein 26 [Source:HGNC Symbol;Acc:HGNC:20327]	13	79311824	79406477	-1
ENSG00000109971	0.491285	11.1313	8.66556	1.99333e-08	8.04155e-08	7.7959	3312	HSPA8	heat shock protein family A (Hsp70) member 8 [Source:HGNC Symbol;Acc:HGNC:5241]	11	123057489	123063230	-1
ENSG00000100227	0.309	7.36716	8.65899	2.01884e-08	8.13237e-08	7.94544	84271	POLDIP3	DNA polymerase delta interacting protein 3 [Source:HGNC Symbol;Acc:HGNC:23782]	22	42583721	42614962	-1
ENSG00000148843	0.391849	7.4348	8.65026	2.0533e-08	8.25715e-08	7.92364	22984	PDCD11	programmed cell death 11 [Source:HGNC Symbol;Acc:HGNC:13408]	10	103396648	103446292	1
ENSG00000183011	-0.455677	4.83975	-8.64846	2.06048e-08	8.28251e-08	8.24361	84316	NAA38	N(alpha)-acetyltransferase 38, NatC auxiliary subunit [Source:HGNC Symbol;Acc:HGNC:28212]	17	7856685	7885238	-1
ENSG00000055917	0.318725	7.1249	8.6418	2.08728e-08	8.38135e-08	7.92547	23369	PUM2	pumilio RNA binding family member 2 [Source:HGNC Symbol;Acc:HGNC:14958]	2	20248691	20352234	-1
ENSG00000145391	-0.367379	6.05172	-8.63683	2.10753e-08	8.45374e-08	8.01241	80854	SETD7	SET domain containing lysine methyltransferase 7 [Source:HGNC Symbol;Acc:HGNC:30412]	4	139495941	139606699	-1
ENSG00000109475	0.303878	7.86398	8.63652	2.10878e-08	8.45694e-08	7.87219	6164	RPL34	ribosomal protein L34 [Source:HGNC Symbol;Acc:HGNC:10340]	4	108620566	108630412	1
ENSG00000099622	0.335704	7.67198	8.60825	2.22787e-08	8.90821e-08	7.82597	1153	CIRBP	cold inducible RNA binding protein [Source:HGNC Symbol;Acc:HGNC:1982]	19	1259384	1274880	1
ENSG00000161960	0.348181	9.46723	8.60408	2.24603e-08	8.97514e-08	7.73154	1973	EIF4A1	eukaryotic translation initiation factor 4A1 [Source:HGNC Symbol;Acc:HGNC:3282]	17	7572706	7579005	1
ENSG00000132109	0.470368	4.05593	8.59261	2.29671e-08	9.15836e-08	8.29173	6737	TRIM21	tripartite motif containing 21 [Source:HGNC Symbol;Acc:HGNC:11312]	11	4384897	4393696	-1
ENSG00000169714	0.354699	8.4573	8.54035	2.54314e-08	1.00544e-07	7.64698	7555	CNBP	CCHC-type zinc finger nucleic acid binding protein [Source:HGNC Symbol;Acc:HGNC:13164]	3	129169484	129183922	-1
ENSG00000196678	0.396353	5.54917	8.52602	2.61541e-08	1.03015e-07	7.84724	112479	ERI2	ERI1 exoribonuclease family member 2 [Source:HGNC Symbol;Acc:HGNC:30541]	16	20780193	20900349	-1
ENSG00000113649	0.302425	7.51449	8.51722	2.66081e-08	1.0463e-07	7.65155	10915	TCERG1	transcription elongation regulator 1 [Source:HGNC Symbol;Acc:HGNC:15630]	5	146447311	146511961	1
ENSG00000213079	0.295796	7.05218	8.51351	2.68019e-08	1.05326e-07	7.67173	22828	SCAF8	SR-related CTD associated factor 8 [Source:HGNC Symbol;Acc:HGNC:20959]	6	154733325	154834244	1
ENSG00000067596	0.299115	6.90029	8.49796	2.76307e-08	1.08314e-07	7.65002	1659	DHX8	DEAH-box helicase 8 [Source:HGNC Symbol;Acc:HGNC:2749]	17	43483865	43544463	1
ENSG00000133606	0.328201	6.04699	8.49329	2.78848e-08	1.09197e-07	7.71438	23608	MKRN1	makorin ring finger protein 1 [Source:HGNC Symbol;Acc:HGNC:7112]	7	140453040	140479569	-1
ENSG00000165275	0.456197	4.1417	8.48194	2.85123e-08	1.1147e-07	8.04741	158234	TRMT10B	tRNA methyltransferase 10B [Source:HGNC Symbol;Acc:HGNC:26454]	9	37753803	37778972	1
ENSG00000139168	0.391186	5.27974	8.47669	2.88074e-08	1.12485e-07	7.79209	85437	ZCRB1	zinc finger CCHC-type and RNA binding motif containing 1 [Source:HGNC Symbol;Acc:HGNC:29620]	12	42312078	42326118	-1
ENSG00000172493	-0.461891	4.9082	-8.47639	2.88244e-08	1.12529e-07	7.88251	4299	AFF1	AF4/FMR2 family member 1 [Source:HGNC Symbol;Acc:HGNC:7135]	4	86935002	87141054	1
ENSG00000072756	0.425642	5.28715	8.46324	2.95779e-08	1.1528e-07	7.76336	51095	TRNT1	tRNA nucleotidyl transferase 1 [Source:HGNC Symbol;Acc:HGNC:17341]	3	3126916	3150879	1
ENSG00000105617	-0.618561	3.19285	-8.45887	2.98328e-08	1.16202e-07	8.27701	79165	LENG1	leukocyte receptor cluster member 1 [Source:HGNC Symbol;Acc:HGNC:15502]	19	54155161	54159882	-1
ENSG00000138050	0.487272	4.0275	8.44689	3.05437e-08	1.18655e-07	8.00456	80745	THUMPD2	THUMP domain containing 2 [Source:HGNC Symbol;Acc:HGNC:14890]	2	39736060	39779267	-1
ENSG00000198783	0.413625	4.31659	8.41932	3.22463e-08	1.24682e-07	7.87833	91603	ZNF830	zinc finger protein 830 [Source:HGNC Symbol;Acc:HGNC:28291]	17	34961530	34963775	1
ENSG00000103356	0.383704	6.0015	8.41597	3.246e-08	1.25329e-07	7.56251	124454	EARS2	glutamyl-tRNA synthetase 2, mitochondrial [Source:HGNC Symbol;Acc:HGNC:29419]	16	23522014	23557731	-1
ENSG00000136807	-0.372825	5.29983	-8.40252	3.33323e-08	1.28514e-07	7.65241	1025 100422910 100616250	CDK9	cyclin dependent kinase 9 [Source:HGNC Symbol;Acc:HGNC:1780]	9	127785679	127790787	1
ENSG00000122692	0.349539	6.99378	8.3927	3.39841e-08	1.30974e-07	7.42992	55234	SMU1	DNA replication regulator and spliceosomal factor [Source:HGNC Symbol;Acc:HGNC:18247]	9	33041764	33076659	-1
ENSG00000221983	0.266896	8.35094	8.38767	3.43231e-08	1.32173e-07	7.3429	7311	UBA52	ubiquitin A-52 residue ribosomal protein fusion product 1 [Source:HGNC Symbol;Acc:HGNC:12458]	19	18571730	18577550	1
ENSG00000119285	0.386175	7.74238	8.38747	3.43365e-08	1.32198e-07	7.37482	55127	HEATR1	HEAT repeat containing 1 [Source:HGNC Symbol;Acc:HGNC:25517]	1	236549005	236604504	-1
ENSG00000114127	0.427517	5.96269	8.38616	3.44253e-08	1.32513e-07	7.5063	54464	XRN1	5'-3' exoribonuclease 1 [Source:HGNC Symbol;Acc:HGNC:30654]	3	142306607	142448062	-1
ENSG00000146223	0.31759	7.58623	8.38363	3.4598e-08	1.3307e-07	7.3761	285855	RPL7L1	ribosomal protein L7 like 1 [Source:HGNC Symbol;Acc:HGNC:21370]	6	42879618	42889925	1
ENSG00000120662	0.527191	3.79684	8.3804	3.48193e-08	1.33812e-07	7.92747	9617	MTRF1	mitochondrial translational release factor 1 [Source:HGNC Symbol;Acc:HGNC:7469]	13	41216369	41263577	-1
ENSG00000166133	0.477384	4.23172	8.37261	3.53594e-08	1.35751e-07	7.80322	27079	RPUSD2	RNA pseudouridylate synthase domain containing 2 [Source:HGNC Symbol;Acc:HGNC:24180]	15	40569300	40574943	1
ENSG00000103005	0.531316	3.55888	8.37228	3.53822e-08	1.35784e-07	7.97228	79650	USB1	U6 snRNA biogenesis phosphodiesterase 1 [Source:HGNC Symbol;Acc:HGNC:25792]	16	57999546	58021618	1
ENSG00000138035	0.362687	6.05502	8.35547	3.65774e-08	1.40115e-07	7.43307	87178	PNPT1	polyribonucleotide nucleotidyltransferase 1 [Source:HGNC Symbol;Acc:HGNC:23166]	2	55634265	55693910	-1
ENSG00000086102	0.32991	6.11072	8.35331	3.67346e-08	1.4055e-07	7.42248	4799	NFX1	nuclear transcription factor, X-box binding 1 [Source:HGNC Symbol;Acc:HGNC:7803]	9	33290511	33371157	1
ENSG00000115368	0.347959	6.65435	8.35289	3.67647e-08	1.40634e-07	7.37203	84128	WDR75	WD repeat domain 75 [Source:HGNC Symbol;Acc:HGNC:25725]	2	189441433	189475565	1
ENSG00000189306	0.390139	5.99032	8.34998	3.69772e-08	1.41361e-07	7.42923	27341	RRP7A	ribosomal RNA processing 7 homolog A [Source:HGNC Symbol;Acc:HGNC:24286]	22	42509968	42519802	-1
ENSG00000105373	0.38398	5.94829	8.3419	3.75735e-08	1.43438e-07	7.4178	29997	GLTSCR2	glioma tumor suppressor candidate region gene 2 [Source:HGNC Symbol;Acc:HGNC:4333]	19	47745522	47757058	1
ENSG00000128739	-0.278444	7.09594	-8.33696	3.79429e-08	1.44761e-07	7.31345	6638	SNRPN	small nuclear ribonucleoprotein polypeptide N [Source:HGNC Symbol;Acc:HGNC:11164]	15	24823637	24978723	1
ENSG00000133858	0.374456	5.16343	8.33105	3.83897e-08	1.46319e-07	7.51686	196441	ZFC3H1	zinc finger C3H1-type containing [Source:HGNC Symbol;Acc:HGNC:28328]	12	71609472	71667725	-1
ENSG00000150593	0.561167	5.07908	8.29299	4.13999e-08	1.57035e-07	7.45429	27250 100616113	PDCD4	programmed cell death 4 (neoplastic transformation inhibitor) [Source:HGNC Symbol;Acc:HGNC:8763]	10	110871795	110900006	1
ENSG00000005189	-0.718899	2.9275	-8.27581	4.28384e-08	1.62103e-07	7.97982	81691	AC004381.6	Putative RNA exonuclease NEF-sp [Source:UniProtKB/Swiss-Prot;Acc:Q96IC2]	16	20806429	20849668	1
ENSG00000007392	0.322964	6.27227	8.27091	4.32577e-08	1.63461e-07	7.23697	55692	LUC7L	LUC7 like [Source:HGNC Symbol;Acc:HGNC:6723]	16	188969	229463	-1
ENSG00000179335	0.309961	6.34421	8.26202	4.40296e-08	1.66014e-07	7.21196	1198	CLK3	CDC like kinase 3 [Source:HGNC Symbol;Acc:HGNC:2071]	15	74598500	74645414	1
ENSG00000165209	-0.372328	5.93579	-8.22745	4.71693e-08	1.76973e-07	7.19492	55342	STRBP	spermatid perinuclear RNA binding protein [Source:HGNC Symbol;Acc:HGNC:16462]	9	123109500	123268576	-1
ENSG00000169976	0.32415	6.07388	8.21797	4.80706e-08	1.79999e-07	7.14893	83443	SF3B5	splicing factor 3b subunit 5 [Source:HGNC Symbol;Acc:HGNC:21083]	6	144094881	144095573	-1
ENSG00000174444	0.276384	9.76622	8.21073	4.87709e-08	1.82477e-07	6.91949	6124	RPL4	ribosomal protein L4 [Source:HGNC Symbol;Acc:HGNC:10353]	15	66498015	66524532	-1
ENSG00000165424	0.420003	6.68404	8.20558	4.92747e-08	1.84181e-07	7.06721	219654	ZCCHC24	zinc finger CCHC-type containing 24 [Source:HGNC Symbol;Acc:HGNC:26911]	10	79382325	79445627	-1
ENSG00000106105	-0.329077	7.60548	-8.20514	4.93179e-08	1.84306e-07	7.01248	2617	GARS	glycyl-tRNA synthetase [Source:HGNC Symbol;Acc:HGNC:4162]	7	30594681	30634033	1
ENSG00000107651	0.360307	6.40819	8.19766	5.0061e-08	1.86752e-07	7.0734	11196	SEC23IP	SEC23 interacting protein [Source:HGNC Symbol;Acc:HGNC:17018]	10	119892711	119944658	1
ENSG00000129315	0.276989	7.07417	8.19535	5.02922e-08	1.87467e-07	7.02039	904	CCNT1	cyclin T1 [Source:HGNC Symbol;Acc:HGNC:1599]	12	48688458	48716998	-1
ENSG00000105323	0.324173	7.83008	8.18391	5.14565e-08	1.91431e-07	6.95245	11100	HNRNPUL1	heterogeneous nuclear ribonucleoprotein U like 1 [Source:HGNC Symbol;Acc:HGNC:17011]	19	41262496	41307598	1
ENSG00000029363	0.415629	8.45935	8.18049	5.18098e-08	1.92519e-07	6.91163	9774	BCLAF1	BCL2 associated transcription factor 1 [Source:HGNC Symbol;Acc:HGNC:16863]	6	136256863	136289851	-1
ENSG00000167264	0.514597	3.75184	8.13293	5.69915e-08	2.10783e-07	7.4312	54920	DUS2	dihydrouridine synthase 2 [Source:HGNC Symbol;Acc:HGNC:26014]	16	67987746	68079320	1
ENSG00000169718	0.433361	5.68086	8.11998	5.84937e-08	2.1575e-07	6.99639	64118	DUS1L	dihydrouridine synthase 1 like [Source:HGNC Symbol;Acc:HGNC:30086]	17	82057506	82065887	-1
ENSG00000128534	0.299477	5.87243	8.09933	6.0973e-08	2.24415e-07	6.92793	51691	LSM8	LSM8 homolog, U6 small nuclear RNA associated [Source:HGNC Symbol;Acc:HGNC:20471]	7	118184032	118192824	1
ENSG00000174891	0.408605	5.05941	8.09197	6.18831e-08	2.275e-07	7.04373	51319	RSRC1	arginine and serine rich coiled-coil 1 [Source:HGNC Symbol;Acc:HGNC:24152]	3	158105855	158545730	1
ENSG00000111605	0.277677	8.04536	8.08246	6.30798e-08	2.31541e-07	6.73062	11052	CPSF6	cleavage and polyadenylation specific factor 6 [Source:HGNC Symbol;Acc:HGNC:13871]	12	69239537	69274358	1
ENSG00000015479	0.296893	9.74087	8.08056	6.33218e-08	2.32339e-07	6.65081	9782	MATR3	matrin 3 [Source:HGNC Symbol;Acc:HGNC:6912]	5	139293648	139331359	1
ENSG00000105821	0.439298	5.76173	8.06844	6.4887e-08	2.37533e-07	6.87801	27000	DNAJC2	DnaJ heat shock protein family (Hsp40) member C2 [Source:HGNC Symbol;Acc:HGNC:13192]	7	103312474	103344873	-1
ENSG00000107929	0.300634	6.13963	8.0631	6.5589e-08	2.39962e-07	6.82118	23185	LARP4B	La ribonucleoprotein domain family member 4B [Source:HGNC Symbol;Acc:HGNC:28987]	10	806914	931705	-1
ENSG00000131013	0.374689	5.39023	8.05897	6.61387e-08	2.41601e-07	6.91534	85313	PPIL4	peptidylprolyl isomerase like 4 [Source:HGNC Symbol;Acc:HGNC:15702]	6	149504733	149546038	-1
ENSG00000122729	-0.344045	6.48843	-8.03355	6.9621e-08	2.53297e-07	6.73267	48	ACO1	aconitase 1 [Source:HGNC Symbol;Acc:HGNC:117]	9	32384603	32454769	1
ENSG00000131043	0.32825	5.54068	8.01661	7.20474e-08	2.61623e-07	6.80289	25980	AAR2	AAR2 splicing factor homolog [Source:HGNC Symbol;Acc:HGNC:15886]	20	36236459	36270918	1
ENSG00000189007	0.438477	3.98456	8.01546	7.22145e-08	2.6218e-07	7.12848	134637	ADAT2	adenosine deaminase, tRNA specific 2 [Source:HGNC Symbol;Acc:HGNC:21172]	6	143422832	143450673	-1
ENSG00000259494	0.390861	4.83571	8.01023	7.29832e-08	2.64667e-07	6.9188	26589	MRPL46	mitochondrial ribosomal protein L46 [Source:HGNC Symbol;Acc:HGNC:1192]	15	88459476	88467419	-1
ENSG00000174780	0.272858	7.33608	8.00519	7.37313e-08	2.67176e-07	6.60968	6731	SRP72	signal recognition particle 72 [Source:HGNC Symbol;Acc:HGNC:11303]	4	56466915	56503680	1
ENSG00000160818	0.462059	6.08106	7.9913	7.58356e-08	2.74434e-07	6.67743	54865	GPATCH4	G-patch domain containing 4 [Source:HGNC Symbol;Acc:HGNC:25982]	1	156594487	156601496	-1
ENSG00000241962	0.356209	5.40304	7.9892	7.61595e-08	2.75396e-07	6.76775		RP11-111H13.1		2	99141485	99322741	1
ENSG00000155275	0.47323	3.91536	7.97707	7.80553e-08	2.81501e-07	7.06558	152992	TRMT44	tRNA methyltransferase 44 homolog (S. cerevisiae) [Source:HGNC Symbol;Acc:HGNC:26653]	4	8436140	8493531	1
ENSG00000130956	0.319219	5.05304	7.93317	8.53354e-08	3.06127e-07	6.71414	22927	HABP4	hyaluronan binding protein 4 [Source:HGNC Symbol;Acc:HGNC:17062]	9	96450201	96491336	1
ENSG00000137168	0.308072	6.65015	7.93027	8.58398e-08	3.0782e-07	6.49732	51645	PPIL1	peptidylprolyl isomerase like 1 [Source:HGNC Symbol;Acc:HGNC:9260]	6	36854827	36875024	-1
ENSG00000138376	-0.338908	5.98717	-7.92964	8.59498e-08	3.08156e-07	6.56846	580	BARD1	BRCA1 associated RING domain 1 [Source:HGNC Symbol;Acc:HGNC:952]	2	214725646	214809711	-1
ENSG00000185324	-0.371529	5.05229	-7.91176	8.9137e-08	3.1844e-07	6.68471	8558	CDK10	cyclin dependent kinase 10 [Source:HGNC Symbol;Acc:HGNC:1770]	16	89680737	89696364	1
ENSG00000119707	0.305802	7.77963	7.89414	9.23956e-08	3.28843e-07	6.35131	58517	RBM25	RNA binding motif protein 25 [Source:HGNC Symbol;Acc:HGNC:23244]	14	73058436	73123898	1
ENSG00000044115	0.263173	8.75129	7.88947	9.32806e-08	3.31806e-07	6.29123	1495	CTNNA1	catenin alpha 1 [Source:HGNC Symbol;Acc:HGNC:2509]	5	138610967	138935034	1
ENSG00000180917	0.347157	5.57112	7.88858	9.34498e-08	3.32346e-07	6.5298	55783	CMTR2	cap methyltransferase 2 [Source:HGNC Symbol;Acc:HGNC:25635]	16	71281389	71289715	-1
ENSG00000159086	0.312653	7.01694	7.88763	9.36312e-08	3.32866e-07	6.38255	94104	PAXBP1	PAX3 and PAX7 binding protein 1 [Source:HGNC Symbol;Acc:HGNC:13579]	21	32733899	32771858	-1
ENSG00000067533	0.417818	6.25198	7.87671	9.57414e-08	3.39859e-07	6.41903	51018	RRP15	ribosomal RNA processing 15 homolog [Source:HGNC Symbol;Acc:HGNC:24255]	1	218285287	218337983	1
ENSG00000092820	-0.310838	6.887	-7.87449	9.61762e-08	3.41083e-07	6.36768	7430	EZR	ezrin [Source:HGNC Symbol;Acc:HGNC:12691]	6	158765741	158819412	-1
ENSG00000171490	0.299947	7.72933	7.86838	9.7385e-08	3.45177e-07	6.29991	26156	RSL1D1	ribosomal L1 domain containing 1 [Source:HGNC Symbol;Acc:HGNC:24534]	16	11833850	11851585	-1
ENSG00000156502	0.389946	5.26604	7.84753	1.01624e-07	3.59262e-07	6.49385	6832	SUPV3L1	Suv3 like RNA helicase [Source:HGNC Symbol;Acc:HGNC:11471]	10	69180232	69209099	1
ENSG00000124214	0.266617	6.94466	7.84669	1.01799e-07	3.59815e-07	6.30112	6780	STAU1	staufen double-stranded RNA binding protein 1 [Source:HGNC Symbol;Acc:HGNC:11370]	20	49113339	49188367	-1
ENSG00000156697	0.417989	5.18463	7.81113	1.09491e-07	3.84708e-07	6.43166	10813	UTP14A	UTP14A small subunit processome component [Source:HGNC Symbol;Acc:HGNC:10665]	X	129906121	129929761	1
ENSG00000056097	0.285711	8.02685	7.80687	1.10452e-07	3.87868e-07	6.1537	51663	ZFR	zinc finger RNA binding protein [Source:HGNC Symbol;Acc:HGNC:17277]	5	32354350	32444761	-1
ENSG00000104131	0.368243	6.72255	7.78067	1.16555e-07	4.07943e-07	6.17638	8669	EIF3J	eukaryotic translation initiation factor 3 subunit J [Source:HGNC Symbol;Acc:HGNC:3270]	15	44537057	44563029	1
ENSG00000119203	0.310348	6.75936	7.76702	1.19871e-07	4.18546e-07	6.14499	51692	CPSF3	cleavage and polyadenylation specific factor 3 [Source:HGNC Symbol;Acc:HGNC:2326]	2	9423568	9473101	1
ENSG00000258818	-0.926708	2.15477	-7.75402	1.2312e-07	4.29022e-07	7.11228	6038	RNASE4	ribonuclease A family member 4 [Source:HGNC Symbol;Acc:HGNC:10047]	14	20684100	20701215	1
ENSG00000140948	0.463355	4.76708	7.71502	1.33424e-07	4.62549e-07	6.3112	23174	ZCCHC14	zinc finger CCHC-type containing 14 [Source:HGNC Symbol;Acc:HGNC:24134]	16	87406246	87492045	-1
ENSG00000197958	0.280135	7.57496	7.70704	1.35638e-07	4.69129e-07	5.96715	6136	RPL12	ribosomal protein L12 [Source:HGNC Symbol;Acc:HGNC:10302]	9	127447674	127451405	-1
ENSG00000141526	-1.23341	1.37307	-7.68037	1.43323e-07	4.93081e-07	7.16923	9123 102465472	SLC16A3	solute carrier family 16 member 3 [Source:HGNC Symbol;Acc:HGNC:10924]	17	82228397	82261129	1
ENSG00000130921	-0.392209	5.39292	-7.67306	1.45507e-07	5.00144e-07	6.11643	91574	C12orf65	chromosome 12 open reading frame 65 [Source:HGNC Symbol;Acc:HGNC:26784]	12	123232916	123257959	1
ENSG00000082516	0.379505	6.59303	7.66795	1.47053e-07	5.04998e-07	5.94652	25929	GEMIN5	gem nuclear organelle associated protein 5 [Source:HGNC Symbol;Acc:HGNC:20043]	5	154887416	154938209	-1
ENSG00000132819	-0.556422	4.81646	-7.6301	1.59053e-07	5.42771e-07	6.14506	55544	RBM38	RNA binding motif protein 38 [Source:HGNC Symbol;Acc:HGNC:15818]	20	57391407	57409333	1
ENSG00000103275	0.275693	7.34262	7.61223	1.65066e-07	5.62077e-07	5.77832	7329	UBE2I	ubiquitin conjugating enzyme E2 I [Source:HGNC Symbol;Acc:HGNC:12485]	16	1308880	1327018	1
ENSG00000206652	-0.891987	2.7576	-7.60633	1.67098e-07	5.68692e-07	6.63669	26871	RNU1-1	RNA, U1 small nuclear 1 [Source:HGNC Symbol;Acc:HGNC:10120]	1	16514122	16514285	-1
ENSG00000134905	0.305606	5.31415	7.60319	1.68194e-07	5.71751e-07	5.96686	79587	CARS2	cysteinyl-tRNA synthetase 2, mitochondrial (putative) [Source:HGNC Symbol;Acc:HGNC:25695]	13	110641412	110713603	-1
ENSG00000145907	0.289	8.85145	7.58296	1.7542e-07	5.94881e-07	5.63547	10146	G3BP1	G3BP stress granule assembly factor 1 [Source:HGNC Symbol;Acc:HGNC:30292]	5	151771045	151812785	1
ENSG00000169057	0.289012	5.66063	7.57889	1.76915e-07	5.99519e-07	5.85907	4204	MECP2	methyl-CpG binding protein 2 [Source:HGNC Symbol;Acc:HGNC:6990]	X	154021573	154137103	-1
ENSG00000020577	-0.795557	3.83855	-7.5624	1.83097e-07	6.19032e-07	6.24975	23034	SAMD4A	sterile alpha motif domain containing 4A [Source:HGNC Symbol;Acc:HGNC:23023]	14	54567097	54793315	1
ENSG00000061794	0.320253	5.82483	7.5349	1.93905e-07	6.53593e-07	5.74144	60488	MRPS35	mitochondrial ribosomal protein S35 [Source:HGNC Symbol;Acc:HGNC:16635]	12	27710773	27756295	1
ENSG00000165271	0.522067	6.20086	7.50655	2.05738e-07	6.9017e-07	5.63577	65083	NOL6	nucleolar protein 6 [Source:HGNC Symbol;Acc:HGNC:19910]	9	33461441	33473930	-1
ENSG00000121057	-0.480039	5.01546	-7.48647	2.1457e-07	7.18019e-07	5.79117	8165	AKAP1	A-kinase anchoring protein 1 [Source:HGNC Symbol;Acc:HGNC:367]	17	57085092	57121349	1
ENSG00000185163	0.363442	5.15522	7.46947	2.22348e-07	7.41955e-07	5.70779	317781	DDX51	DEAD-box helicase 51 [Source:HGNC Symbol;Acc:HGNC:20082]	12	132136594	132144335	-1
ENSG00000119718	0.351245	5.10124	7.46477	2.24551e-07	7.48386e-07	5.70791	8892	EIF2B2	eukaryotic translation initiation factor 2B subunit beta [Source:HGNC Symbol;Acc:HGNC:3258]	14	75002911	75012366	1
ENSG00000112578	0.435022	5.31357	7.44648	2.33332e-07	7.75473e-07	5.62903	705	BYSL	bystin like [Source:HGNC Symbol;Acc:HGNC:1157]	6	41921188	41933046	1
ENSG00000168066	0.344112	6.39305	7.42739	2.42885e-07	8.04823e-07	5.44658	7536	SF1	splicing factor 1 [Source:HGNC Symbol;Acc:HGNC:12950]	11	64764606	64778786	-1
ENSG00000109606	0.288485	9.04593	7.42355	2.4485e-07	8.10626e-07	5.28357	1665	DHX15	DEAH-box helicase 15 [Source:HGNC Symbol;Acc:HGNC:2738]	4	24517441	24584550	-1
ENSG00000058729	0.367366	5.61539	7.4054	2.54382e-07	8.3955e-07	5.49131	55781	RIOK2	RIO kinase 2 [Source:HGNC Symbol;Acc:HGNC:18999]	5	97160867	97183260	-1
ENSG00000145191	0.303993	6.31759	7.39424	2.6043e-07	8.58466e-07	5.38195	8893	EIF2B5	eukaryotic translation initiation factor 2B subunit epsilon [Source:HGNC Symbol;Acc:HGNC:3261]	3	184135038	184145311	1
ENSG00000165526	0.297074	5.51596	7.39208	2.6162e-07	8.61953e-07	5.47833	84881	RPUSD4	RNA pseudouridylate synthase domain containing 4 [Source:HGNC Symbol;Acc:HGNC:25898]	11	126202094	126211692	-1
ENSG00000247626	0.401979	4.646	7.36844	2.74987e-07	9.02531e-07	5.59364	92935	MARS2	methionyl-tRNA synthetase 2, mitochondrial [Source:HGNC Symbol;Acc:HGNC:25133]	2	197705369	197708387	1
ENSG00000137200	0.279796	6.10704	7.36046	2.79656e-07	9.16485e-07	5.33032	23070	CMTR1	cap methyltransferase 1 [Source:HGNC Symbol;Acc:HGNC:21077]	6	37433219	37482827	1
ENSG00000149273	0.284783	8.94076	7.35756	2.81374e-07	9.21422e-07	5.14492	6188	RPS3	ribosomal protein S3 [Source:HGNC Symbol;Acc:HGNC:10420]	11	75399486	75422280	1
ENSG00000116874	-0.413421	5.09984	-7.31352	3.08832e-07	1.00492e-06	5.397	10352	WARS2	tryptophanyl tRNA synthetase 2, mitochondrial [Source:HGNC Symbol;Acc:HGNC:12730]	1	119031216	119140671	-1
ENSG00000134684	-0.312546	7.19432	-7.29201	3.23234e-07	1.04765e-06	5.09883	8565	YARS	tyrosyl-tRNA synthetase [Source:HGNC Symbol;Acc:HGNC:12840]	1	32775237	32818153	-1
ENSG00000164880	-0.512005	5.67753	-7.27387	3.35911e-07	1.08596e-06	5.21246	26173	INTS1	integrator complex subunit 1 [Source:HGNC Symbol;Acc:HGNC:24555]	7	1470277	1504367	-1
ENSG00000137154	0.250911	10.1026	7.24475	3.5735e-07	1.14998e-06	4.85432	6194	RPS6	ribosomal protein S6 [Source:HGNC Symbol;Acc:HGNC:10429]	9	19375715	19380254	-1
ENSG00000111144	-0.311532	6.97648	-7.24082	3.60352e-07	1.15905e-06	5.00098	4048	LTA4H	leukotriene A4 hydrolase [Source:HGNC Symbol;Acc:HGNC:6710]	12	96000828	96043520	-1
ENSG00000102241	0.287018	6.80214	7.23673	3.63502e-07	1.16859e-06	4.99962	27336	HTATSF1	HIV-1 Tat specific factor 1 [Source:HGNC Symbol;Acc:HGNC:5276]	X	136497079	136512346	1
ENSG00000103342	0.298862	7.55072	7.21273	3.82554e-07	1.22527e-06	4.90072	2935	GSPT1	G1 to S phase transition 1 [Source:HGNC Symbol;Acc:HGNC:4621]	16	11868128	11916082	-1
ENSG00000140988	0.270274	8.88025	7.20701	3.87253e-07	1.23907e-06	4.81894	6187	RPS2	ribosomal protein S2 [Source:HGNC Symbol;Acc:HGNC:10404]	16	1962052	1964860	-1
ENSG00000124279	0.424837	4.16326	7.20295	3.90616e-07	1.24899e-06	5.34674	79072	FASTKD3	FAST kinase domains 3 [Source:HGNC Symbol;Acc:HGNC:28758]	5	7859159	7869037	-1
ENSG00000167112	0.347567	5.61532	7.20163	3.91714e-07	1.25207e-06	5.04729	26995	TRUB2	TruB pseudouridine synthase family member 2 [Source:HGNC Symbol;Acc:HGNC:17170]	9	128305161	128322742	-1
ENSG00000143751	0.426297	5.52919	7.20056	3.92608e-07	1.2543e-06	5.05794	163859	SDE2	SDE2 telomere maintenance homolog [Source:HGNC Symbol;Acc:HGNC:26643]	1	225982702	225999331	-1
ENSG00000071082	0.290208	8.18096	7.19937	3.9361e-07	1.25686e-06	4.83653	6160	RPL31	ribosomal protein L31 [Source:HGNC Symbol;Acc:HGNC:10334]	2	101001715	101024032	1
ENSG00000132341	0.285138	8.74014	7.17399	4.15518e-07	1.32237e-06	4.75278	5901	RAN	RAN, member RAS oncogene family [Source:HGNC Symbol;Acc:HGNC:9846]	12	130871879	130877678	1
ENSG00000124831	-0.364176	5.03779	-7.1724	4.1693e-07	1.32624e-06	5.09912	9208	LRRFIP1	LRR binding FLII interacting protein 1 [Source:HGNC Symbol;Acc:HGNC:6702]	2	237627576	237813682	1
ENSG00000135828	0.578331	3.18574	7.16963	4.19404e-07	1.33362e-06	5.52711	6041	RNASEL	ribonuclease L [Source:HGNC Symbol;Acc:HGNC:10050]	1	182573634	182589256	-1
ENSG00000170633	0.286455	6.1827	7.16699	4.21775e-07	1.34071e-06	4.89951	80196	RNF34	ring finger protein 34 [Source:HGNC Symbol;Acc:HGNC:17297]	12	121400041	121430623	1
ENSG00000112996	0.308893	6.13588	7.1563	4.3153e-07	1.36873e-06	4.88083	10884	MRPS30	mitochondrial ribosomal protein S30 [Source:HGNC Symbol;Acc:HGNC:8769]	5	44808925	44820428	1
ENSG00000091127	0.351342	6.17449	7.14135	4.4555e-07	1.41049e-06	4.84367	54517	PUS7	pseudouridylate synthase 7 (putative) [Source:HGNC Symbol;Acc:HGNC:26033]	7	105439661	105522267	-1
ENSG00000083635	0.47979	4.32687	7.13536	4.51302e-07	1.42716e-06	5.15797	26747	NUFIP1	NUFIP1, FMR1 interacting protein 1 [Source:HGNC Symbol;Acc:HGNC:8057]	13	44939249	44989483	-1
ENSG00000123384	-0.37665	5.52644	-7.12776	4.58709e-07	1.4496e-06	4.91184	4035	LRP1	LDL receptor related protein 1 [Source:HGNC Symbol;Acc:HGNC:6692]	12	57128493	57213351	1
ENSG00000198231	0.230791	7.65398	7.10246	4.8427e-07	1.52506e-06	4.65265	11325	DDX42	DEAD-box helicase 42 [Source:HGNC Symbol;Acc:HGNC:18676]	17	63773603	63819317	1
ENSG00000170892	-0.327131	6.02245	-7.08654	5.0111e-07	1.57365e-06	4.74844	79042	TSEN34	tRNA splicing endonuclease subunit 34 [Source:HGNC Symbol;Acc:HGNC:15506]	19	54189938	54194536	1
ENSG00000148296	0.356766	5.65275	7.08415	5.03681e-07	1.58094e-06	4.78322	6838	SURF6	surfeit 6 [Source:HGNC Symbol;Acc:HGNC:11478]	9	133328774	133336398	-1
ENSG00000113240	0.358742	4.98793	7.07779	5.10617e-07	1.60086e-06	4.88516	57396	CLK4	CDC like kinase 4 [Source:HGNC Symbol;Acc:HGNC:13659]	5	178602664	178630615	-1
ENSG00000187837	-0.277128	9.85615	-7.07333	5.1553e-07	1.61573e-06	4.48807	3006	HIST1H1C	histone cluster 1, H1c [Source:HGNC Symbol;Acc:HGNC:4716]	6	26055787	26056428	-1
ENSG00000037474	0.337404	6.61006	7.05592	5.35197e-07	1.67267e-06	4.61565	54888	NSUN2	NOP2/Sun RNA methyltransferase family member 2 [Source:HGNC Symbol;Acc:HGNC:25994]	5	6599239	6633291	-1
ENSG00000111641	0.403298	5.97729	7.04307	5.50205e-07	1.71613e-06	4.64877	4839	NOP2	NOP2 nucleolar protein [Source:HGNC Symbol;Acc:HGNC:7867]	12	6556863	6568691	-1
ENSG00000074800	-0.289593	10.1865	-7.04097	5.52696e-07	1.72282e-06	4.40463	2023	ENO1	enolase 1 [Source:HGNC Symbol;Acc:HGNC:3350]	1	8861002	8879249	-1
ENSG00000130749	0.331176	5.6684	7.03694	5.57517e-07	1.73699e-06	4.67672	23211	ZC3H4	zinc finger CCCH-type containing 4 [Source:HGNC Symbol;Acc:HGNC:17808]	19	47064187	47113752	-1
ENSG00000112855	0.319168	5.26553	7.03264	5.62713e-07	1.75137e-06	4.7329	23438	HARS2	histidyl-tRNA synthetase 2, mitochondrial [Source:HGNC Symbol;Acc:HGNC:4817]	5	140691426	140699291	1
ENSG00000163811	0.389494	7.35896	7.02337	5.74064e-07	1.78327e-06	4.49414	23160	WDR43	WD repeat domain 43 [Source:HGNC Symbol;Acc:HGNC:28945]	2	28894643	28948222	1
ENSG00000134987	0.292027	6.67858	7.0179	5.8087e-07	1.80323e-06	4.5265	134430	WDR36	WD repeat domain 36 [Source:HGNC Symbol;Acc:HGNC:30696]	5	111091716	111130502	1
ENSG00000161547	0.26104	8.74473	7.01158	5.88851e-07	1.82592e-06	4.39416	6427 693221	SRSF2	serine and arginine rich splicing factor 2 [Source:HGNC Symbol;Acc:HGNC:10783]	17	76734115	76737374	-1
ENSG00000105171	0.42267	4.6554	6.99801	6.06347e-07	1.87618e-06	4.77862	10775	POP4	POP4 homolog, ribonuclease P/MRP subunit [Source:HGNC Symbol;Acc:HGNC:30081]	19	29604017	29617237	1
ENSG00000145388	0.298112	5.57235	6.98349	6.25677e-07	1.9319e-06	4.57274	57721	METTL14	methyltransferase like 14 [Source:HGNC Symbol;Acc:HGNC:29330]	4	118685368	118715433	1
ENSG00000026297	-0.876526	1.37279	-6.97651	6.35178e-07	1.95933e-06	5.63056	8635	RNASET2	ribonuclease T2 [Source:HGNC Symbol;Acc:HGNC:21686]	6	166929504	166957191	-1
ENSG00000143621	0.283508	8.58869	6.97039	6.4365e-07	1.98449e-06	4.31005	3608	ILF2	interleukin enhancer binding factor 2 [Source:HGNC Symbol;Acc:HGNC:6037]	1	153661788	153671048	-1
ENSG00000067248	0.308447	6.50165	6.96877	6.45901e-07	1.99014e-06	4.43131	54505	DHX29	DEAH-box helicase 29 [Source:HGNC Symbol;Acc:HGNC:15815]	5	55256245	55307722	-1
ENSG00000151304	0.383089	4.91538	6.92662	7.07643e-07	2.16421e-06	4.56447	153443	SRFBP1	serum response factor binding protein 1 [Source:HGNC Symbol;Acc:HGNC:26333]	5	121961961	122075570	1
ENSG00000146007	0.282656	6.07853	6.91958	7.18532e-07	2.19575e-06	4.36321	153527	ZMAT2	zinc finger matrin-type 2 [Source:HGNC Symbol;Acc:HGNC:26433]	5	140698680	140706676	1
ENSG00000136628	0.247297	7.6986	6.9173	7.22101e-07	2.20488e-06	4.23943	2058	EPRS	glutamyl-prolyl-tRNA synthetase [Source:HGNC Symbol;Acc:HGNC:3418]	1	219968601	220046658	-1
ENSG00000131469	0.300478	8.38151	6.91514	7.25486e-07	2.21486e-06	4.19738	6155	RPL27	ribosomal protein L27 [Source:HGNC Symbol;Acc:HGNC:10328]	17	42998273	43002959	1
ENSG00000122068	0.284371	6.85099	6.90295	7.44949e-07	2.27062e-06	4.25872	84248	FYTTD1	forty-two-three domain containing 1 [Source:HGNC Symbol;Acc:HGNC:25407]	3	197737179	197787596	1
ENSG00000131018	0.381779	6.3944	6.88968	7.66737e-07	2.33254e-06	4.26426	23345	SYNE1	spectrin repeat containing nuclear envelope protein 1 [Source:HGNC Symbol;Acc:HGNC:17089]	6	152121684	152637801	-1
ENSG00000090470	0.325789	5.02139	6.88154	7.80431e-07	2.36888e-06	4.44306	10081	PDCD7	programmed cell death 7 [Source:HGNC Symbol;Acc:HGNC:8767]	15	65117379	65133836	-1
ENSG00000122435	0.405066	4.53093	6.86694	8.05617e-07	2.44259e-06	4.51528	54482	TRMT13	tRNA methyltransferase 13 homolog [Source:HGNC Symbol;Acc:HGNC:25502]	1	100133150	100150497	1
ENSG00000198900	0.286785	6.67213	6.86377	8.11198e-07	2.45795e-06	4.18389	7150	TOP1	topoisomerase (DNA) I [Source:HGNC Symbol;Acc:HGNC:11986]	20	41028818	41124487	1
ENSG00000115053	0.276627	10.077	6.84637	8.42532e-07	2.54638e-06	3.9734	4691	NCL	nucleolin [Source:HGNC Symbol;Acc:HGNC:7667]	2	231453531	231483641	-1
ENSG00000166181	0.24599	7.51272	6.8398	8.54678e-07	2.58e-06	4.07693	8539	API5	apoptosis inhibitor 5 [Source:HGNC Symbol;Acc:HGNC:594]	11	43311963	43344529	1
ENSG00000090263	0.41428	4.69831	6.8369	8.60103e-07	2.5936e-06	4.41031	51650	MRPS33	mitochondrial ribosomal protein S33 [Source:HGNC Symbol;Acc:HGNC:16634]	7	141002610	141015228	-1
ENSG00000103495	0.25781	7.26361	6.83321	8.67041e-07	2.6113e-06	4.07679	4150	MAZ	MYC associated zinc finger protein [Source:HGNC Symbol;Acc:HGNC:6914]	16	29806106	29811164	1
ENSG00000089157	0.212766	8.81912	6.82552	8.81716e-07	2.65045e-06	3.97614	6175	RPLP0	ribosomal protein lateral stalk subunit P0 [Source:HGNC Symbol;Acc:HGNC:10371]	12	120196686	120201235	-1
ENSG00000196154	0.82116	1.92695	6.82388	8.84879e-07	2.6587e-06	5.10279	6275	S100A4	S100 calcium binding protein A4 [Source:HGNC Symbol;Acc:HGNC:10494]	1	153543613	153550136	-1
ENSG00000101343	0.277307	5.8689	6.81917	8.94024e-07	2.68405e-06	4.16425	51340	CRNKL1	crooked neck pre-mRNA splicing factor 1 [Source:HGNC Symbol;Acc:HGNC:15762]	20	20034368	20056046	-1
ENSG00000071859	-0.380606	4.9582	-6.80147	9.29245e-07	2.78099e-06	4.29279	9130	FAM50A	family with sequence similarity 50 member A [Source:HGNC Symbol;Acc:HGNC:18786]	X	154444126	154450654	1
ENSG00000115761	0.31528	5.68602	6.79467	9.43166e-07	2.81954e-06	4.13425	79954	NOL10	nucleolar protein 10 [Source:HGNC Symbol;Acc:HGNC:25862]	2	10570766	10689987	-1
ENSG00000064703	0.277193	6.15034	6.79265	9.47336e-07	2.83023e-06	4.07158	11218	DDX20	DEAD-box helicase 20 [Source:HGNC Symbol;Acc:HGNC:2743]	1	111755245	111768016	1
ENSG00000130713	0.282089	6.33073	6.78148	9.70763e-07	2.89338e-06	4.02826	23404	EXOSC2	exosome component 2 [Source:HGNC Symbol;Acc:HGNC:17097]	9	130693721	130704894	1
ENSG00000131051	0.224327	8.20164	6.77697	9.80404e-07	2.9212e-06	3.89784	9584	RBM39	RNA binding motif protein 39 [Source:HGNC Symbol;Acc:HGNC:15923]	20	35703609	35742312	-1
ENSG00000137513	0.364532	4.92126	6.76223	1.01254e-06	3.01223e-06	4.19564	79731	NARS2	asparaginyl-tRNA synthetase 2, mitochondrial (putative) [Source:HGNC Symbol;Acc:HGNC:26274]	11	78435961	78574874	-1
ENSG00000169710	-0.393728	8.20275	-6.76027	1.01691e-06	3.02328e-06	3.86363	2194	FASN	fatty acid synthase [Source:HGNC Symbol;Acc:HGNC:3594]	17	82078333	82098332	-1
ENSG00000136522	0.307003	5.94641	6.74983	1.04043e-06	3.08599e-06	3.9986	57129	MRPL47	mitochondrial ribosomal protein L47 [Source:HGNC Symbol;Acc:HGNC:16652]	3	179588285	179604654	-1
ENSG00000067225	-0.235383	9.6473	-6.74005	1.06298e-06	3.14894e-06	3.75224	5315	PKM	pyruvate kinase, muscle [Source:HGNC Symbol;Acc:HGNC:9021]	15	72199029	72231822	-1
ENSG00000138326	0.266137	8.5426	6.73619	1.07201e-06	3.17223e-06	3.78845	6229	RPS24	ribosomal protein S24 [Source:HGNC Symbol;Acc:HGNC:10411]	10	78033760	78056812	1
ENSG00000120705	0.292224	7.65133	6.7215	1.10714e-06	3.26599e-06	3.80308	2107	ETF1	eukaryotic translation termination factor 1 [Source:HGNC Symbol;Acc:HGNC:3477]	5	138506095	138543300	-1
ENSG00000164934	0.31965	6.65067	6.71914	1.11288e-06	3.28142e-06	3.86075	25879	DCAF13	DDB1 and CUL4 associated factor 13 [Source:HGNC Symbol;Acc:HGNC:24535]	8	103414714	103443453	1
ENSG00000104889	-0.278772	5.72943	-6.69778	1.16638e-06	3.42478e-06	3.91915	10535	RNASEH2A	ribonuclease H2 subunit A [Source:HGNC Symbol;Acc:HGNC:18518]	19	12806580	12813638	1
ENSG00000169062	0.293613	5.40164	6.69121	1.18335e-06	3.47033e-06	3.94619	65110	UPF3A	UPF3 regulator of nonsense transcripts homolog A (yeast) [Source:HGNC Symbol;Acc:HGNC:20332]	13	114281584	114305817	1
ENSG00000119953	0.330599	5.27496	6.67435	1.22807e-06	3.59149e-06	3.92995	10285	SMNDC1	survival motor neuron domain containing 1 [Source:HGNC Symbol;Acc:HGNC:16900]	10	110290730	110304951	-1
ENSG00000115310	-0.222336	7.15721	-6.6671	1.24783e-06	3.64463e-06	3.71249	57142	RTN4	reticulon 4 [Source:HGNC Symbol;Acc:HGNC:14085]	2	54972187	55112621	-1
ENSG00000083223	0.310435	5.26028	6.66552	1.25218e-06	3.65522e-06	3.91277	79670	ZCCHC6	zinc finger CCHC-type containing 6 [Source:HGNC Symbol;Acc:HGNC:25817]	9	86287733	86354454	-1
ENSG00000124380	0.312937	5.19807	6.66123	1.26408e-06	3.68543e-06	3.91446	11017	SNRNP27	small nuclear ribonucleoprotein U4/U6.U5 subunit 27 [Source:HGNC Symbol;Acc:HGNC:30240]	2	69893560	69905575	1
ENSG00000115364	0.252113	6.20811	6.66014	1.26711e-06	3.69314e-06	3.76715	9801	MRPL19	mitochondrial ribosomal protein L19 [Source:HGNC Symbol;Acc:HGNC:14052]	2	75646783	75690851	1
ENSG00000125445	0.268279	6.04851	6.6412	1.32113e-06	3.84053e-06	3.74164	51081	MRPS7	mitochondrial ribosomal protein S7 [Source:HGNC Symbol;Acc:HGNC:14499]	17	75261674	75266373	1
ENSG00000204764	0.34958	4.4931	6.62041	1.38318e-06	4.00621e-06	3.97016	64901	RANBP17	RAN binding protein 17 [Source:HGNC Symbol;Acc:HGNC:14428]	5	170861870	171300015	1
ENSG00000182117	0.347576	6.45395	6.6129	1.4063e-06	4.06571e-06	3.63648	55505	NOP10	NOP10 ribonucleoprotein [Source:HGNC Symbol;Acc:HGNC:14378]	15	34341713	34343177	-1
ENSG00000104835	0.309238	4.99627	6.57946	1.51428e-06	4.35599e-06	3.76827	54938	SARS2	seryl-tRNA synthetase 2, mitochondrial [Source:HGNC Symbol;Acc:HGNC:17697]	19	38915266	38930896	-1
ENSG00000075618	-0.455041	8.00099	-6.57363	1.53394e-06	4.4112e-06	3.45322	6624	FSCN1	fascin actin-bundling protein 1 [Source:HGNC Symbol;Acc:HGNC:11148]	7	5592823	5606655	1
ENSG00000146540	-0.347174	5.40897	-6.57203	1.53937e-06	4.42279e-06	3.68781	84310	C7orf50	chromosome 7 open reading frame 50 [Source:HGNC Symbol;Acc:HGNC:22421]	7	996986	1138260	-1
ENSG00000142528	0.271975	5.47144	6.55385	1.60266e-06	4.59006e-06	3.62391	25888	ZNF473	zinc finger protein 473 [Source:HGNC Symbol;Acc:HGNC:23239]	19	50025714	50053414	1
ENSG00000173145	0.420124	5.84255	6.55372	1.6031e-06	4.59063e-06	3.56802	64318	NOC3L	NOC3 like DNA replication regulator [Source:HGNC Symbol;Acc:HGNC:24034]	10	94333226	94362959	-1
ENSG00000144231	0.250682	6.99153	6.54935	1.61871e-06	4.63253e-06	3.45317	5433	POLR2D	RNA polymerase II subunit D [Source:HGNC Symbol;Acc:HGNC:9191]	2	127843551	127858157	-1
ENSG00000197976	-0.375625	5.35945	-6.54445	1.63642e-06	4.67969e-06	3.63478	8227	AKAP17A	A-kinase anchoring protein 17A [Source:HGNC Symbol;Acc:HGNC:18783]	X	1591593	1602514	1
ENSG00000124383	0.380207	5.5404	6.54065	1.65027e-06	4.71645e-06	3.58208	10199	MPHOSPH10	M-phase phosphoprotein 10 [Source:HGNC Symbol;Acc:HGNC:7213]	2	71130314	71150101	1
ENSG00000108591	0.253131	5.36773	6.53217	1.68162e-06	4.79809e-06	3.59209	1819	DRG2	developmentally regulated GTP binding protein 2 [Source:HGNC Symbol;Acc:HGNC:3030]	17	18087886	18107971	1
ENSG00000115946	0.382162	5.089	6.53013	1.68924e-06	4.81837e-06	3.63732	56902	PNO1	partner of NOB1 homolog [Source:HGNC Symbol;Acc:HGNC:32790]	2	68157844	68176238	1
ENSG00000018610	0.335643	4.66681	6.52645	1.7031e-06	4.85355e-06	3.71739	63932	CXorf56	chromosome X open reading frame 56 [Source:HGNC Symbol;Acc:HGNC:26239]	X	119538149	119565408	-1
ENSG00000120948	0.293399	7.89267	6.52337	1.71478e-06	4.88537e-06	3.34079	23435	TARDBP	TAR DNA binding protein [Source:HGNC Symbol;Acc:HGNC:11571]	1	11012344	11026420	1
ENSG00000168566	-0.301638	5.96456	-6.52181	1.72077e-06	4.89947e-06	3.48873	154007	SNRNP48	small nuclear ribonucleoprotein U11/U12 subunit 48 [Source:HGNC Symbol;Acc:HGNC:21368]	6	7590199	7611967	1
ENSG00000146909	0.316232	5.55777	6.51626	1.74209e-06	4.95572e-06	3.52418	64434	NOM1	nucleolar protein with MIF4G domain 1 [Source:HGNC Symbol;Acc:HGNC:13244]	7	156949723	156973182	1
ENSG00000086504	-0.296548	5.46887	-6.5009	1.80258e-06	5.11477e-06	3.51427	10573	MRPL28	mitochondrial ribosomal protein L28 [Source:HGNC Symbol;Acc:HGNC:14484]	16	367384	370527	-1
ENSG00000168806	-0.323388	4.76618	-6.49528	1.82529e-06	5.17534e-06	3.6397	9836	LCMT2	leucine carboxyl methyltransferase 2 [Source:HGNC Symbol;Acc:HGNC:17558]	15	43323649	43330605	-1
ENSG00000213516	0.23943	6.80001	6.49205	1.83845e-06	5.20877e-06	3.3355	494115	RBMXL1	RNA binding motif protein, X-linked like 1 [Source:HGNC Symbol;Acc:HGNC:25073]	1	88979456	88992960	-1
ENSG00000124228	0.271738	5.98357	6.48618	1.8626e-06	5.26931e-06	3.3972	55661	DDX27	DEAD-box helicase 27 [Source:HGNC Symbol;Acc:HGNC:15837]	20	49219295	49244077	1
ENSG00000137815	0.235343	6.78419	6.4841	1.87126e-06	5.29065e-06	3.31849	23168	RTF1	RTF1 homolog, Paf1/RNA polymerase II complex component [Source:HGNC Symbol;Acc:HGNC:28996]	15	41408408	41483563	1
ENSG00000164252	0.319439	4.73305	6.48135	1.88275e-06	5.3184e-06	3.60002	55109	AGGF1	angiogenic factor with G-patch and FHA domains 1 [Source:HGNC Symbol;Acc:HGNC:24684]	5	77029251	77065234	1
ENSG00000082153	0.256482	7.58604	6.44985	2.01965e-06	5.6789e-06	3.19052	9689	BZW1	basic leucine zipper and W2 domains 1 [Source:HGNC Symbol;Acc:HGNC:18380]	2	200810594	200827338	1
ENSG00000114942	0.261261	6.69701	6.44732	2.03105e-06	5.70926e-06	3.24069	1933	EEF1B2	eukaryotic translation elongation factor 1 beta 2 [Source:HGNC Symbol;Acc:HGNC:3208]	2	206159585	206162928	1
ENSG00000143889	0.27602	6.4459	6.42986	2.11174e-06	5.91767e-06	3.2207	92906	HNRNPLL	heterogeneous nuclear ribonucleoprotein L like [Source:HGNC Symbol;Acc:HGNC:25127]	2	38561978	38603586	-1
ENSG00000144580	0.26403	7.023	6.41931	2.16208e-06	6.04536e-06	3.15447	9125	CNOT9	CCR4-NOT transcription complex subunit 9 [Source:HGNC Symbol;Acc:HGNC:10445]	2	218568580	218597080	1
ENSG00000116898	0.274943	5.86219	6.41562	2.17999e-06	6.09183e-06	3.25113	64960	MRPS15	mitochondrial ribosomal protein S15 [Source:HGNC Symbol;Acc:HGNC:14504]	1	36455718	36464437	-1
ENSG00000158406	-0.337961	8.71543	-6.41041	2.20554e-06	6.15961e-06	3.04328	8365	HIST1H4H	histone cluster 1, H4h [Source:HGNC Symbol;Acc:HGNC:4788]	6	26277609	26285638	-1
ENSG00000104408	0.238817	7.64382	6.40994	2.20787e-06	6.1652e-06	3.09601	3646	EIF3E	eukaryotic translation initiation factor 3 subunit E [Source:HGNC Symbol;Acc:HGNC:3277]	8	108201216	108435333	-1
ENSG00000106591	0.259993	5.58796	6.4036	2.23937e-06	6.24766e-06	3.26264	64983	MRPL32	mitochondrial ribosomal protein L32 [Source:HGNC Symbol;Acc:HGNC:14035]	7	42932200	42948958	1
ENSG00000138768	-0.301037	6.89764	-6.39215	2.29748e-06	6.39754e-06	3.10441	8615	USO1	USO1 vesicle transport factor [Source:HGNC Symbol;Acc:HGNC:30904]	4	75724593	75814286	1
ENSG00000164347	0.277111	5.703	6.38764	2.32076e-06	6.45669e-06	3.20884	84340	GFM2	G elongation factor mitochondrial 2 [Source:HGNC Symbol;Acc:HGNC:29682]	5	74721204	74767371	-1
ENSG00000065978	0.217348	9.05743	6.37259	2.40029e-06	6.66037e-06	2.93862	4904	YBX1	Y-box binding protein 1 [Source:HGNC Symbol;Acc:HGNC:8014]	1	42682427	42702349	1
ENSG00000188177	0.345581	4.28754	6.35404	2.50215e-06	6.92984e-06	3.41232	376940	ZC3H6	zinc finger CCCH-type containing 6 [Source:HGNC Symbol;Acc:HGNC:24762]	2	112275594	112340063	1
ENSG00000001497	0.284912	5.69534	6.34956	2.52741e-06	6.99776e-06	3.12258	81887	LAS1L	LAS1 like, ribosome biogenesis factor [Source:HGNC Symbol;Acc:HGNC:25726]	X	65512582	65534775	-1
ENSG00000178896	0.438823	4.60885	6.34391	2.55967e-06	7.08089e-06	3.31238	54512 102465510	EXOSC4	exosome component 4 [Source:HGNC Symbol;Acc:HGNC:18189]	8	144078626	144080647	1
ENSG00000135763	0.375649	6.04944	6.32595	2.66496e-06	7.35072e-06	3.02206	9816	URB2	URB2 ribosome biogenesis 2 homolog (S. cerevisiae) [Source:HGNC Symbol;Acc:HGNC:28967]	1	229626234	229660199	1
ENSG00000103194	0.237364	6.85786	6.30877	2.76979e-06	7.62215e-06	2.91177	9100	USP10	ubiquitin specific peptidase 10 [Source:HGNC Symbol;Acc:HGNC:12608]	16	84699978	84779922	1
ENSG00000196943	0.271092	6.2145	6.30834	2.77248e-06	7.62845e-06	2.96402	161424	NOP9	NOP9 nucleolar protein [Source:HGNC Symbol;Acc:HGNC:19826]	14	24299862	24309124	1
ENSG00000172262	0.255591	6.0144	6.30716	2.77988e-06	7.64769e-06	2.9835	7690	ZNF131	zinc finger protein 131 [Source:HGNC Symbol;Acc:HGNC:12915]	5	43065176	43192021	1
ENSG00000144048	0.350806	4.35013	6.2877	2.90425e-06	7.96676e-06	3.24457	8446	DUSP11	dual specificity phosphatase 11 [Source:HGNC Symbol;Acc:HGNC:3066]	2	73762184	73780157	-1
ENSG00000107951	0.268011	5.69524	6.27818	2.96712e-06	8.12863e-06	2.95852	55149 102466227	MTPAP	mitochondrial poly(A) polymerase [Source:HGNC Symbol;Acc:HGNC:25532]	10	30309801	30374448	-1
ENSG00000160194	0.256087	5.83418	6.27133	3.01322e-06	8.23946e-06	2.92359	4731	NDUFV3	NADH:ubiquinone oxidoreductase subunit V3 [Source:HGNC Symbol;Acc:HGNC:7719]	21	42879644	42913304	1
ENSG00000089220	0.205905	8.33459	6.2672	3.04138e-06	8.30929e-06	2.7304	5037	PEBP1	phosphatidylethanolamine binding protein 1 [Source:HGNC Symbol;Acc:HGNC:8630]	12	118135858	118145584	1
ENSG00000148688	0.283747	5.44697	6.26034	3.08881e-06	8.43038e-06	2.95585	10556	RPP30	ribonuclease P/MRP subunit p30 [Source:HGNC Symbol;Acc:HGNC:17688]	10	90871716	90908553	1
ENSG00000138385	0.294573	6.85521	6.25915	3.09705e-06	8.44801e-06	2.79739	6741	SSB	Sjogren syndrome antigen B [Source:HGNC Symbol;Acc:HGNC:11316]	2	169791933	169812064	1
ENSG00000146731	0.262252	8.41155	6.25454	3.12942e-06	8.52649e-06	2.69701	908	CCT6A	chaperonin containing TCP1 subunit 6A [Source:HGNC Symbol;Acc:HGNC:1620]	7	56051630	56063989	1
ENSG00000146109	0.264743	5.71584	6.25131	3.15229e-06	8.58019e-06	2.89359	29777	ABT1	activator of basal transcription 1 [Source:HGNC Symbol;Acc:HGNC:17369]	6	26596952	26600744	1
ENSG00000132466	0.191707	7.97973	6.24206	3.21875e-06	8.75605e-06	2.69148	26057	ANKRD17	ankyrin repeat domain 17 [Source:HGNC Symbol;Acc:HGNC:23575]	4	73073376	73258798	-1
ENSG00000133706	0.231517	8.01789	6.23909	3.24039e-06	8.81241e-06	2.68235	51520	LARS	leucyl-tRNA synthetase [Source:HGNC Symbol;Acc:HGNC:6512]	5	146113038	146182660	-1
ENSG00000137656	0.25736	5.47835	6.23494	3.27089e-06	8.88897e-06	2.8924	84811	BUD13	BUD13 homolog [Source:HGNC Symbol;Acc:HGNC:28199]	11	116748170	116772988	-1
ENSG00000133773	0.299026	5.04089	6.23236	3.29e-06	8.93785e-06	2.9649	29080	CCDC59	coiled-coil domain containing 59 [Source:HGNC Symbol;Acc:HGNC:25005]	12	82223681	82358805	-1
ENSG00000137996	0.280058	5.17806	6.2278	3.32398e-06	9.02034e-06	2.92828	8634	RTCA	RNA 3'-terminal phosphate cyclase [Source:HGNC Symbol;Acc:HGNC:17981]	1	100266207	100292769	1
ENSG00000134186	0.2399	6.29071	6.22055	3.37886e-06	9.1622e-06	2.75411	55119	PRPF38B	pre-mRNA processing factor 38B [Source:HGNC Symbol;Acc:HGNC:25512]	1	108692323	108701803	1
ENSG00000151576	0.343785	5.88593	6.21466	3.42417e-06	9.27101e-06	2.78549	79691	QTRT2	queuine tRNA-ribosyltransferase accessory subunit 2 [Source:HGNC Symbol;Acc:HGNC:25771]	3	114005833	114088422	1
ENSG00000177192	0.428951	4.2591	6.20991	3.46109e-06	9.36162e-06	3.08658	80324	PUS1	pseudouridylate synthase 1 [Source:HGNC Symbol;Acc:HGNC:15508]	12	131929200	131945896	1
ENSG00000111361	0.249729	5.89641	6.19808	3.55484e-06	9.59879e-06	2.74629	1967	EIF2B1	eukaryotic translation initiation factor 2B subunit alpha [Source:HGNC Symbol;Acc:HGNC:3257]	12	123620406	123633766	-1
ENSG00000065548	0.304846	6.85845	6.19671	3.56593e-06	9.62599e-06	2.65289	55854	ZC3H15	zinc finger CCCH-type containing 15 [Source:HGNC Symbol;Acc:HGNC:29528]	2	186486156	186509363	1
ENSG00000090905	0.224768	6.99151	6.19368	3.59043e-06	9.69074e-06	2.63745	27327	TNRC6A	trinucleotide repeat containing 6A [Source:HGNC Symbol;Acc:HGNC:11969]	16	24610209	24827632	1
ENSG00000079246	0.252443	9.91529	6.17948	3.70762e-06	9.98574e-06	2.46037	7520	XRCC5	X-ray repair cross complementing 5 [Source:HGNC Symbol;Acc:HGNC:12833]	2	216107464	216206303	1
ENSG00000197498	0.338043	5.65316	6.17896	3.71198e-06	9.99607e-06	2.73516	84154	RPF2	ribosome production factor 2 homolog [Source:HGNC Symbol;Acc:HGNC:20870]	6	110982015	111028263	1
ENSG00000133704	0.254817	6.23783	6.17083	3.78094e-06	1.01724e-05	2.64426	10526	IPO8	importin 8 [Source:HGNC Symbol;Acc:HGNC:9853]	12	30628988	30695986	-1
ENSG00000164134	0.338169	7.61518	6.16944	3.79289e-06	1.02009e-05	2.54331	80155	NAA15	N(alpha)-acetyltransferase 15, NatA auxiliary subunit [Source:HGNC Symbol;Acc:HGNC:30782]	4	139301455	139420033	1
ENSG00000163798	0.244888	5.22836	6.14756	3.98568e-06	1.06816e-05	2.73359	22950	SLC4A1AP	solute carrier family 4 member 1 adaptor protein [Source:HGNC Symbol;Acc:HGNC:13813]	2	27663471	27694976	1
ENSG00000119446	0.276865	5.04372	6.13659	4.08606e-06	1.09352e-05	2.74299	92400	RBM18	RNA binding motif protein 18 [Source:HGNC Symbol;Acc:HGNC:28413]	9	122237624	122264839	-1
ENSG00000241058	0.391849	4.40562	6.13446	4.10585e-06	1.09835e-05	2.87689	221078	NSUN6	NOP2/Sun RNA methyltransferase family member 6 [Source:HGNC Symbol;Acc:HGNC:23529]	10	18545561	18659285	-1
ENSG00000108651	0.290301	5.96901	6.11553	4.28612e-06	1.14335e-05	2.54582	55813	UTP6	UTP6, small subunit processome component [Source:HGNC Symbol;Acc:HGNC:18279]	17	31860899	31901765	-1
ENSG00000171103	0.343195	4.42516	6.11023	4.338e-06	1.1567e-05	2.81655	55006	TRMT61B	tRNA methyltransferase 61B [Source:HGNC Symbol;Acc:HGNC:26070]	2	28849821	28870301	-1
ENSG00000063177	0.226208	8.67434	6.10985	4.34178e-06	1.15754e-05	2.3492	6141	RPL18	ribosomal protein L18 [Source:HGNC Symbol;Acc:HGNC:10310]	19	48615328	48619536	-1
ENSG00000134419	0.238794	7.28841	6.10878	4.3523e-06	1.15986e-05	2.42218	6210	RPS15A	ribosomal protein S15a [Source:HGNC Symbol;Acc:HGNC:10389]	16	18781295	18790383	-1
ENSG00000223496	0.238135	6.05937	6.10125	4.42748e-06	1.17923e-05	2.50222	118460	EXOSC6	exosome component 6 [Source:HGNC Symbol;Acc:HGNC:19055]	16	70246778	70251930	-1
ENSG00000172053	0.202811	7.281	6.09478	4.49305e-06	1.19535e-05	2.39027	5859 102465536	QARS	glutaminyl-tRNA synthetase [Source:HGNC Symbol;Acc:HGNC:9751]	3	49095932	49105135	-1
ENSG00000152795	0.225046	8.93815	6.09203	4.52123e-06	1.20218e-05	2.29576	9987	HNRNPDL	heterogeneous nuclear ribonucleoprotein D like [Source:HGNC Symbol;Acc:HGNC:5037]	4	82422564	82430408	-1
ENSG00000205542	-0.274447	7.86881	-6.08837	4.55904e-06	1.21138e-05	2.34411	7114	TMSB4X	thymosin beta 4, X-linked [Source:HGNC Symbol;Acc:HGNC:11881]	X	12975108	12977227	1
ENSG00000183207	-0.242796	6.72231	-6.08746	4.56841e-06	1.21353e-05	2.41314	10856	RUVBL2	RuvB like AAA ATPase 2 [Source:HGNC Symbol;Acc:HGNC:10475]	19	48993448	49015995	1
ENSG00000125485	0.301396	4.95461	6.07733	4.67501e-06	1.23959e-05	2.62309	64794	DDX31	DEAD-box helicase 31 [Source:HGNC Symbol;Acc:HGNC:16715]	9	132592997	132670401	-1
ENSG00000184357	-0.247493	9.39355	-6.06446	4.81393e-06	1.27376e-05	2.21476	3009	HIST1H1B	histone cluster 1, H1b [Source:HGNC Symbol;Acc:HGNC:4719]	6	27866849	27867529	-1
ENSG00000113407	0.249342	8.34457	6.04914	4.98488e-06	1.31477e-05	2.22436	6897	TARS	threonyl-tRNA synthetase [Source:HGNC Symbol;Acc:HGNC:11572]	5	33440696	33469539	1
ENSG00000197111	0.199393	7.01107	6.03836	5.10884e-06	1.34448e-05	2.27574	5094	PCBP2	poly(rC) binding protein 2 [Source:HGNC Symbol;Acc:HGNC:8648]	12	53452102	53481162	1
ENSG00000143624	-0.229884	6.38295	-6.03817	5.11109e-06	1.34489e-05	2.32697	65123	INTS3	integrator complex subunit 3 [Source:HGNC Symbol;Acc:HGNC:26153]	1	153728067	153774808	1
ENSG00000134077	0.271627	5.15348	6.03805	5.11253e-06	1.34508e-05	2.49295	25917	THUMPD3	THUMP domain containing 3 [Source:HGNC Symbol;Acc:HGNC:24493]	3	9362842	9386791	1
ENSG00000174740	0.460176	3.17163	6.03664	5.12893e-06	1.34883e-05	2.9693	140886	PABPC5	poly(A) binding protein cytoplasmic 5 [Source:HGNC Symbol;Acc:HGNC:13629]	X	91434595	91438584	1
ENSG00000137804	-0.255621	7.75188	-6.02359	5.28388e-06	1.38632e-05	2.19979	51203	NUSAP1	nucleolar and spindle associated protein 1 [Source:HGNC Symbol;Acc:HGNC:18538]	15	41332694	41381050	1
ENSG00000134644	0.19871	7.90264	6.01783	5.3538e-06	1.40311e-05	2.17543	9698	PUM1	pumilio RNA binding family member 1 [Source:HGNC Symbol;Acc:HGNC:14957]	1	30931506	31065991	-1
ENSG00000076650	0.372435	4.14261	6.00858	5.46814e-06	1.4309e-05	2.6489	55094	GPATCH1	G-patch domain containing 1 [Source:HGNC Symbol;Acc:HGNC:24658]	19	33080880	33130542	1
ENSG00000181610	0.293247	5.54534	6.00517	5.51088e-06	1.44089e-05	2.34804	51649	MRPS23	mitochondrial ribosomal protein S23 [Source:HGNC Symbol;Acc:HGNC:14509]	17	57834781	57850056	-1
ENSG00000158042	0.311592	5.59146	6.00084	5.56558e-06	1.45399e-05	2.3306	63875	MRPL17	mitochondrial ribosomal protein L17 [Source:HGNC Symbol;Acc:HGNC:14053]	11	6680782	6683401	-1
ENSG00000059588	0.313517	5.20486	5.9951	5.63912e-06	1.47179e-05	2.38272	6894	TARBP1	TAR (HIV-1) RNA binding protein 1 [Source:HGNC Symbol;Acc:HGNC:11568]	1	234391313	234479103	-1
ENSG00000134001	0.257327	7.2972	5.98291	5.7984e-06	1.51149e-05	2.12841	1965	EIF2S1	eukaryotic translation initiation factor 2 subunit alpha [Source:HGNC Symbol;Acc:HGNC:3265]	14	67359997	67386516	1
ENSG00000086589	0.214355	6.20604	5.9573	6.14826e-06	1.59633e-05	2.15098	55696	RBM22	RNA binding motif protein 22 [Source:HGNC Symbol;Acc:HGNC:25503]	5	150690794	150701107	-1
ENSG00000178952	-0.218886	7.22891	-5.92567	6.61045e-06	1.70861e-05	2.0015	7284 100616256	TUFM	Tu translation elongation factor, mitochondrial [Source:HGNC Symbol;Acc:HGNC:12420]	16	28842411	28846408	-1
ENSG00000169371	0.276691	4.73763	5.92548	6.61325e-06	1.709e-05	2.315	10073	SNUPN	snurportin 1 [Source:HGNC Symbol;Acc:HGNC:14245]	15	75598083	75626469	-1
ENSG00000254093	0.335866	4.62029	5.91963	6.70268e-06	1.7308e-05	2.32697	54984	PINX1	PIN2/TERF1 interacting, telomerase inhibitor 1 [Source:HGNC Symbol;Acc:HGNC:30046]	8	10764963	10839884	-1
ENSG00000166166	0.494797	4.26025	5.91051	6.84428e-06	1.76473e-05	2.38961	115708	TRMT61A	tRNA methyltransferase 61A [Source:HGNC Symbol;Acc:HGNC:23790]	14	103529184	103537073	1
ENSG00000125676	0.247802	7.09926	5.90686	6.90183e-06	1.77836e-05	1.96267	57187	THOC2	THO complex 2 [Source:HGNC Symbol;Acc:HGNC:19073]	X	123600561	123733056	-1
ENSG00000075975	0.272253	5.83097	5.89629	7.07144e-06	1.81762e-05	2.05214	23609	MKRN2	makorin ring finger protein 2 [Source:HGNC Symbol;Acc:HGNC:7113]	3	12557014	12583713	1
ENSG00000170144	0.253426	7.42594	5.88761	7.21373e-06	1.85093e-05	1.89782	220988 100616394	HNRNPA3	heterogeneous nuclear ribonucleoprotein A3 [Source:HGNC Symbol;Acc:HGNC:24941]	2	177212563	177223958	1
ENSG00000113300	0.233279	6.41494	5.85792	7.72343e-06	1.97584e-05	1.89776	57472	CNOT6	CCR4-NOT transcription complex subunit 6 [Source:HGNC Symbol;Acc:HGNC:14099]	5	180494412	180578405	1
ENSG00000174243	0.214336	7.10043	5.85125	7.84288e-06	2.0045e-05	1.83233	9416	DDX23	DEAD-box helicase 23 [Source:HGNC Symbol;Acc:HGNC:17347]	12	48829764	48852842	-1
ENSG00000132153	0.206763	7.37382	5.85082	7.85052e-06	2.00592e-05	1.81479	22907	DHX30	DEAH-box helicase 30 [Source:HGNC Symbol;Acc:HGNC:16716]	3	47802909	47850195	1
ENSG00000168872	0.264333	6.30517	5.84567	7.94418e-06	2.02702e-05	1.87918	55308	DDX19A	DEAD-box helicase 19A [Source:HGNC Symbol;Acc:HGNC:25628]	16	70346829	70373383	1
ENSG00000139767	1.02861	0.122418	5.83803	8.08514e-06	2.06059e-05	3.29904	84530	SRRM4	serine/arginine repetitive matrix 4 [Source:HGNC Symbol;Acc:HGNC:29389]	12	118981495	119163051	1
ENSG00000120333	0.292369	5.44055	5.83474	8.14658e-06	2.07486e-05	1.96606	63931	MRPS14	mitochondrial ribosomal protein S14 [Source:HGNC Symbol;Acc:HGNC:14049]	1	175010789	175023425	-1
ENSG00000130826	0.399442	6.6177	5.83229	8.19278e-06	2.08522e-05	1.82019	1736 100847052	DKC1	dyskerin pseudouridine synthase 1 [Source:HGNC Symbol;Acc:HGNC:2890]	X	154762742	154777689	1
ENSG00000160193	0.358073	4.6165	5.8311	8.2152e-06	2.09036e-05	2.12005	10785	WDR4	WD repeat domain 4 [Source:HGNC Symbol;Acc:HGNC:12756]	21	42843094	42879568	-1
ENSG00000100902	0.244712	6.77415	5.82327	8.36486e-06	2.1256e-05	1.78795	5687	PSMA6	proteasome subunit alpha 6 [Source:HGNC Symbol;Acc:HGNC:9535]	14	35278633	35317493	1
ENSG00000114416	0.21833	7.1997	5.80874	8.64959e-06	2.19414e-05	1.72631	8087	FXR1	FMR1 autosomal homolog 1 [Source:HGNC Symbol;Acc:HGNC:4023]	3	180868141	180982753	1
ENSG00000158435	0.264005	5.84765	5.79418	8.94508e-06	2.26485e-05	1.81018	55571	CNOT11	CCR4-NOT transcription complex subunit 11 [Source:HGNC Symbol;Acc:HGNC:25217]	2	101252802	101270316	1
ENSG00000104529	0.240163	8.22475	5.79127	9.00543e-06	2.27892e-05	1.6269	1936	EEF1D	eukaryotic translation elongation factor 1 delta [Source:HGNC Symbol;Acc:HGNC:3211]	8	143579697	143599541	-1
ENSG00000068438	-0.303369	5.13923	-5.77189	9.41753e-06	2.37592e-05	1.88435	24140	FTSJ1	FtsJ RNA methyltransferase homolog 1 (E. coli) [Source:HGNC Symbol;Acc:HGNC:13254]	X	48476021	48486364	1
ENSG00000185272	0.915117	1.09954	5.76144	9.64768e-06	2.42914e-05	2.88939	54033	RBM11	RNA binding motif protein 11 [Source:HGNC Symbol;Acc:HGNC:9897]	21	14216130	14228372	1
ENSG00000125351	0.259647	4.87222	5.75196	9.86137e-06	2.48064e-05	1.87881	65109	UPF3B	UPF3 regulator of nonsense transcripts homolog B (yeast) [Source:HGNC Symbol;Acc:HGNC:20439]	X	119805311	119852998	-1
ENSG00000174371	0.324713	6.20868	5.74555	1.00086e-05	2.51568e-05	1.653	9156	EXO1	exonuclease 1 [Source:HGNC Symbol;Acc:HGNC:3511]	1	241847967	241895148	1
ENSG00000162396	0.446524	2.99156	5.74234	1.00831e-05	2.53307e-05	2.32993	25973	PARS2	prolyl-tRNA synthetase 2, mitochondrial (putative) [Source:HGNC Symbol;Acc:HGNC:30563]	1	54756898	54764514	-1
ENSG00000101391	0.29262	5.14596	5.7094	1.08821e-05	2.72081e-05	1.72349	51654	CDK5RAP1	CDK5 regulatory subunit associated protein 1 [Source:HGNC Symbol;Acc:HGNC:15880]	20	33358839	33401561	-1
ENSG00000101654	0.252817	5.75551	5.65571	1.23251e-05	3.05225e-05	1.49601	8731	RNMT	RNA guanine-7 methyltransferase [Source:HGNC Symbol;Acc:HGNC:10075]	18	13726660	13764558	1
ENSG00000157349	0.265626	5.19049	5.65103	1.246e-05	3.08365e-05	1.57739	11269	DDX19B	DEAD-box helicase 19B [Source:HGNC Symbol;Acc:HGNC:2742]	16	70289663	70335283	1
ENSG00000145833	0.223395	7.29412	5.65034	1.248e-05	3.08819e-05	1.34687	9879	DDX46	DEAD-box helicase 46 [Source:HGNC Symbol;Acc:HGNC:18681]	5	134758771	134855133	1
ENSG00000100664	0.20142	8.64212	5.64239	1.27126e-05	3.14329e-05	1.25442	1983	EIF5	eukaryotic translation initiation factor 5 [Source:HGNC Symbol;Acc:HGNC:3299]	14	103333544	103345025	1
ENSG00000205339	-0.214974	8.53667	-5.63033	1.3074e-05	3.22549e-05	1.2331	10527	IPO7	importin 7 [Source:HGNC Symbol;Acc:HGNC:9852]	11	9384622	9448126	1
ENSG00000164329	0.272953	5.42491	5.6199	1.33949e-05	3.29995e-05	1.46205	167153	PAPD4	poly(A) RNA polymerase D4, non-canonical [Source:HGNC Symbol;Acc:HGNC:26776]	5	79612120	79686648	1
ENSG00000153187	0.210864	10.0551	5.60205	1.39629e-05	3.4283e-05	1.10198	3192	HNRNPU	heterogeneous nuclear ribonucleoprotein U [Source:HGNC Symbol;Acc:HGNC:5048]	1	244840638	244864542	-1
ENSG00000135698	0.293517	5.01109	5.59828	1.40861e-05	3.45631e-05	1.48694	10200	MPHOSPH6	M-phase phosphoprotein 6 [Source:HGNC Symbol;Acc:HGNC:7214]	16	82147798	82170226	-1
ENSG00000108883	0.228843	7.71392	5.58267	1.46075e-05	3.57627e-05	1.16216	9343	EFTUD2	elongation factor Tu GTP binding domain containing 2 [Source:HGNC Symbol;Acc:HGNC:30858]	17	44849943	44899662	-1
ENSG00000055483	0.332065	4.52503	5.58125	1.4656e-05	3.58595e-05	1.55174	57602	USP36	ubiquitin specific peptidase 36 [Source:HGNC Symbol;Acc:HGNC:20062]	17	78787381	78841441	-1
ENSG00000144713	0.193932	8.23295	5.58052	1.46807e-05	3.59108e-05	1.12868	6161	RPL32	ribosomal protein L32 [Source:HGNC Symbol;Acc:HGNC:10336]	3	12834485	12841588	-1
ENSG00000107937	0.23775	7.05668	5.55912	1.54316e-05	3.76527e-05	1.14527	23560	GTPBP4	GTP binding protein 4 [Source:HGNC Symbol;Acc:HGNC:21535]	10	988019	1019936	1
ENSG00000088930	0.202704	7.8193	5.55783	1.54781e-05	3.77542e-05	1.09742	22803	XRN2	5'-3' exoribonuclease 2 [Source:HGNC Symbol;Acc:HGNC:12836]	20	21303304	21389827	1
ENSG00000142937	0.203129	9.19944	5.5469	1.58777e-05	3.86694e-05	1.00347	6202	RPS8	ribosomal protein S8 [Source:HGNC Symbol;Acc:HGNC:10441]	1	44775251	44778779	1
ENSG00000153037	0.267546	5.36216	5.54282	1.60295e-05	3.9009e-05	1.2901	6728	SRP19	signal recognition particle 19 [Source:HGNC Symbol;Acc:HGNC:11300]	5	112861222	112869788	1
ENSG00000100023	0.275014	5.2597	5.53875	1.61825e-05	3.93443e-05	1.29849	23759	PPIL2	peptidylprolyl isomerase like 2 [Source:HGNC Symbol;Acc:HGNC:9261]	22	21666009	21700015	1
ENSG00000130312	-0.338418	4.20016	-5.53233	1.64271e-05	3.98948e-05	1.53213	64981	MRPL34	mitochondrial ribosomal protein L34 [Source:HGNC Symbol;Acc:HGNC:14488]	19	17292609	17306843	1
ENSG00000178149	-0.245811	5.70744	-5.52791	1.65973e-05	4.02721e-05	1.2079	55152	DALRD3	DALR anticodon binding domain containing 3 [Source:HGNC Symbol;Acc:HGNC:25536]	3	49015488	49022293	-1
ENSG00000135297	0.258224	5.15053	5.52377	1.67588e-05	4.0643e-05	1.28339	25821	MTO1	mitochondrial tRNA translation optimization 1 [Source:HGNC Symbol;Acc:HGNC:19261]	6	73461578	73509236	1
ENSG00000173818	-0.463828	3.02782	-5.52277	1.67977e-05	4.07323e-05	1.82773	284131	ENDOV	endonuclease V [Source:HGNC Symbol;Acc:HGNC:26640]	17	80415165	80438086	1
ENSG00000151923	0.241409	5.86533	5.50966	1.73203e-05	4.1919e-05	1.135	7073	TIAL1	TIA1 cytotoxic granule-associated RNA binding protein-like 1 [Source:HGNC Symbol;Acc:HGNC:11804]	10	119571802	119597029	-1
ENSG00000182810	0.383766	4.09527	5.50163	1.76485e-05	4.26589e-05	1.46709	55794	DDX28	DEAD-box helicase 28 [Source:HGNC Symbol;Acc:HGNC:17330]	16	68021274	68023442	-1
ENSG00000182180	0.201972	6.94444	5.49584	1.78887e-05	4.32011e-05	1.00234	51021	MRPS16	mitochondrial ribosomal protein S16 [Source:HGNC Symbol;Acc:HGNC:14048]	10	73248843	73252693	-1
ENSG00000136875	0.248655	6.34968	5.49473	1.79352e-05	4.32914e-05	1.0455	9128	PRPF4	pre-mRNA processing factor 4 [Source:HGNC Symbol;Acc:HGNC:17349]	9	113275343	113292905	1
ENSG00000166831	-0.822898	1.17699	-5.48813	1.82145e-05	4.39152e-05	2.26938	348093	RBPMS2	RNA binding protein with multiple splicing 2 [Source:HGNC Symbol;Acc:HGNC:19098]	15	64739892	64775587	-1
ENSG00000126749	0.245623	6.31142	5.48149	1.84996e-05	4.45574e-05	1.01763	10436	EMG1	EMG1, N1-specific pseudouridine methyltransferase [Source:HGNC Symbol;Acc:HGNC:16912]	12	6970893	6979941	1
ENSG00000125977	-0.251702	6.1932	-5.48061	1.85374e-05	4.4637e-05	1.03325	8894	EIF2S2	eukaryotic translation initiation factor 2 subunit beta [Source:HGNC Symbol;Acc:HGNC:3266]	20	34088298	34112332	-1
ENSG00000198042	0.276416	6.26182	5.46763	1.91091e-05	4.59031e-05	0.989301	84549	MAK16	MAK16 homolog [Source:HGNC Symbol;Acc:HGNC:13703]	8	33484750	33501260	1
ENSG00000172809	0.23523	7.51658	5.45912	1.94939e-05	4.67503e-05	0.87985	6169	RPL38	ribosomal protein L38 [Source:HGNC Symbol;Acc:HGNC:10349]	17	74203582	74210655	1
ENSG00000239672	0.271329	7.57172	5.43818	2.04738e-05	4.89334e-05	0.826629	4830	NME1	NME/NM23 nucleoside diphosphate kinase 1 [Source:HGNC Symbol;Acc:HGNC:7849]	17	51153536	51162428	1
ENSG00000103319	-0.292953	4.77372	-5.43524	2.06153e-05	4.92468e-05	1.16298	29904 101930123	EEF2K	eukaryotic elongation factor 2 kinase [Source:HGNC Symbol;Acc:HGNC:24615]	16	22206282	22288732	1
ENSG00000100220	0.194939	7.30799	5.43117	2.08133e-05	4.9701e-05	0.825736	51493	RTCB	RNA 2',3'-cyclic phosphate and 5'-OH ligase [Source:HGNC Symbol;Acc:HGNC:26935]	22	32387582	32412255	-1
ENSG00000163938	0.297676	7.22334	5.42421	2.11554e-05	5.04735e-05	0.813789	26354	GNL3	G protein nucleolar 3 [Source:HGNC Symbol;Acc:HGNC:29931]	3	52681156	52694492	1
ENSG00000172071	-0.257186	5.04385	-5.41054	2.18447e-05	5.20592e-05	1.04567	9451	EIF2AK3	eukaryotic translation initiation factor 2 alpha kinase 3 [Source:HGNC Symbol;Acc:HGNC:3255]	2	88556741	88627576	-1
ENSG00000108588	0.215885	6.6981	5.40936	2.19056e-05	5.21978e-05	0.813356	57003	CCDC47	coiled-coil domain containing 47 [Source:HGNC Symbol;Acc:HGNC:24856]	17	63745250	63776351	-1
ENSG00000089597	-0.172138	8.41675	-5.40655	2.20504e-05	5.25229e-05	0.707137	23193	GANAB	glucosidase II alpha subunit [Source:HGNC Symbol;Acc:HGNC:4138]	11	62624826	62646726	-1
ENSG00000165733	0.25515	7.11261	5.39506	2.26533e-05	5.38307e-05	0.751261	9790	BMS1	BMS1, ribosome biogenesis factor [Source:HGNC Symbol;Acc:HGNC:23505]	10	42782801	42834937	1
ENSG00000130402	-0.334229	7.60575	-5.38642	2.31171e-05	5.48642e-05	0.704673	81	ACTN4	actinin alpha 4 [Source:HGNC Symbol;Acc:HGNC:166]	19	38647649	38731583	1
ENSG00000131773	-0.820967	1.83791	-5.38044	2.34444e-05	5.55853e-05	1.8382	10656	KHDRBS3	KH RNA binding domain containing, signal transduction associated 3 [Source:HGNC Symbol;Acc:HGNC:18117]	8	135457457	135656722	1
ENSG00000185651	0.201305	6.38515	5.37606	2.36865e-05	5.61173e-05	0.759662	7332	UBE2L3	ubiquitin conjugating enzyme E2 L3 [Source:HGNC Symbol;Acc:HGNC:12488]	22	21549447	21624034	1
ENSG00000160917	-0.222458	6.36685	-5.37458	2.37694e-05	5.62856e-05	0.76232	10898	CPSF4	cleavage and polyadenylation specific factor 4 [Source:HGNC Symbol;Acc:HGNC:2327]	7	99438922	99457371	1
ENSG00000185728	0.197029	7.36018	5.37241	2.38906e-05	5.65514e-05	0.682488	253943	YTHDF3	YTH N6-methyladenosine RNA binding protein 3 [Source:HGNC Symbol;Acc:HGNC:26465]	8	63168553	63212786	1
ENSG00000171566	0.20722	6.84365	5.37183	2.39236e-05	5.66153e-05	0.713579	5356	PLRG1	pleiotropic regulator 1 [Source:HGNC Symbol;Acc:HGNC:9089]	4	154535006	154550435	-1
ENSG00000138785	0.290429	4.48607	5.36962	2.40477e-05	5.68949e-05	1.05812	57117	INTS12	integrator complex subunit 12 [Source:HGNC Symbol;Acc:HGNC:25067]	4	105682627	105895986	-1
ENSG00000185650	-0.488126	5.21663	-5.36913	2.40759e-05	5.69543e-05	0.920978	677	ZFP36L1	ZFP36 ring finger protein like 1 [Source:HGNC Symbol;Acc:HGNC:1107]	14	68787660	68796253	-1
ENSG00000143374	0.298017	4.54707	5.36129	2.45234e-05	5.79409e-05	1.02371	80222 102465529	TARS2	threonyl-tRNA synthetase 2, mitochondrial (putative) [Source:HGNC Symbol;Acc:HGNC:30740]	1	150487364	150507609	1
ENSG00000138095	0.19121	8.61699	5.35653	2.47993e-05	5.8549e-05	0.575945	10128	LRPPRC	leucine rich pentatricopeptide repeat containing [Source:HGNC Symbol;Acc:HGNC:15714]	2	43886508	43996005	-1
ENSG00000138303	0.221118	5.41199	5.35521	2.48767e-05	5.87242e-05	0.835334	51008	ASCC1	activating signal cointegrator 1 complex subunit 1 [Source:HGNC Symbol;Acc:HGNC:24268]	10	72096032	72217134	-1
ENSG00000124788	0.736919	2.61875	5.33677	2.5979e-05	6.10834e-05	1.47073	6310	ATXN1	ataxin 1 [Source:HGNC Symbol;Acc:HGNC:10548]	6	16299112	16761491	-1
ENSG00000256453	0.401094	3.05482	5.32324	2.68196e-05	6.29117e-05	1.3193	373863	DND1	DND microRNA-mediated repression inhibitor 1 [Source:HGNC Symbol;Acc:HGNC:23799]	5	140670794	140673586	-1
ENSG00000164967	-0.381756	3.44742	-5.30269	2.81495e-05	6.58117e-05	1.18501	138716	RPP25L	ribonuclease P/MRP subunit p25 like [Source:HGNC Symbol;Acc:HGNC:19909]	9	34610486	34612104	-1
ENSG00000124614	0.238752	5.99019	5.29912	2.83869e-05	6.63586e-05	0.617421	6204	RPS10	ribosomal protein S10 [Source:HGNC Symbol;Acc:HGNC:10383]	6	34417454	34426125	-1
ENSG00000165630	0.306632	4.1891	5.28428	2.93973e-05	6.86106e-05	0.926276	8559	PRPF18	pre-mRNA processing factor 18 [Source:HGNC Symbol;Acc:HGNC:17351]	10	13586927	13630868	1
ENSG00000060339	0.255384	7.74962	5.28151	2.95904e-05	6.90529e-05	0.442442	55749	CCAR1	cell division cycle and apoptosis regulator 1 [Source:HGNC Symbol;Acc:HGNC:24236]	10	68721012	68792377	1
ENSG00000110700	0.223769	7.77269	5.28059	2.96546e-05	6.91771e-05	0.439087	6207	RPS13	ribosomal protein S13 [Source:HGNC Symbol;Acc:HGNC:10386]	11	17074389	17077787	-1
ENSG00000126602	0.18037	6.71447	5.27949	2.97312e-05	6.93302e-05	0.502116	10131	TRAP1	TNF receptor associated protein 1 [Source:HGNC Symbol;Acc:HGNC:16264]	16	3651639	3717597	-1
ENSG00000144736	0.291058	5.1077	5.2768	2.99207e-05	6.9712e-05	0.702394	55164	SHQ1	SHQ1, H/ACA ribonucleoprotein assembly factor [Source:HGNC Symbol;Acc:HGNC:25543]	3	72749277	72861914	-1
ENSG00000108953	0.199682	8.91043	5.26423	3.08211e-05	7.16637e-05	0.341597	7531	YWHAE	tyrosine 3-monooxygenase/tryptophan 5-monooxygenase activation protein epsilon [Source:HGNC Symbol;Acc:HGNC:12851]	17	1344272	1400378	-1
ENSG00000100056	0.284051	4.62975	5.25296	3.16516e-05	7.34474e-05	0.746118	8220	DGCR14	DiGeorge syndrome critical region gene 14 [Source:HGNC Symbol;Acc:HGNC:16817]	22	19130279	19144684	-1
ENSG00000108848	0.185333	7.48023	5.24745	3.20657e-05	7.43719e-05	0.376705	51747	LUC7L3	LUC7 like 3 pre-mRNA splicing factor [Source:HGNC Symbol;Acc:HGNC:24309]	17	50719544	50756213	1
ENSG00000164104	-0.187512	8.21858	-5.23575	3.29642e-05	7.62602e-05	0.309362	3148	HMGB2	high mobility group box 2 [Source:HGNC Symbol;Acc:HGNC:5000]	4	173331695	173335125	-1
ENSG00000118181	0.276953	6.91189	5.23095	3.33398e-05	7.7082e-05	0.371738	6230	RPS25	ribosomal protein S25 [Source:HGNC Symbol;Acc:HGNC:10413]	11	119015712	119018691	-1
ENSG00000146282	0.212948	5.72959	5.22947	3.34568e-05	7.73148e-05	0.485	57038	RARS2	arginyl-tRNA synthetase 2, mitochondrial [Source:HGNC Symbol;Acc:HGNC:21406]	6	87514378	87590003	-1
ENSG00000158163	-0.323943	3.94509	-5.22727	3.36308e-05	7.76967e-05	0.869677	199221	DZIP1L	DAZ interacting zinc finger protein 1 like [Source:HGNC Symbol;Acc:HGNC:26551]	3	138061990	138115818	-1
ENSG00000108349	0.197153	6.52841	5.22701	3.36515e-05	7.7727e-05	0.390773	22794 102466986	CASC3	cancer susceptibility candidate 3 [Source:HGNC Symbol;Acc:HGNC:17040]	17	40140318	40172183	1
ENSG00000185129	0.296683	4.31752	5.22482	3.3826e-05	7.81111e-05	0.752388	5813	PURA	purine rich element binding protein A [Source:HGNC Symbol;Acc:HGNC:9701]	5	140107777	140125619	1
ENSG00000107833	-0.283358	4.62568	-5.21027	3.50092e-05	8.0647e-05	0.658673	10360	NPM3	nucleophosmin/nucleoplasmin 3 [Source:HGNC Symbol;Acc:HGNC:7931]	10	101781325	101783413	-1
ENSG00000141378	0.204922	6.17195	5.20791	3.52053e-05	8.10789e-05	0.378634	51651	PTRH2	peptidyl-tRNA hydrolase 2 [Source:HGNC Symbol;Acc:HGNC:24265]	17	59674636	59707626	-1
ENSG00000109536	0.277137	4.21526	5.2063	3.53395e-05	8.13585e-05	0.733457	2483	FRG1	FSHD region gene 1 [Source:HGNC Symbol;Acc:HGNC:3954]	4	189940788	189963204	1
ENSG00000140598	0.249509	4.78581	5.20063	3.5816e-05	8.2359e-05	0.586511	79631	EFL1	elongation factor like GTPase 1 [Source:HGNC Symbol;Acc:HGNC:25789]	15	82130230	82262763	-1
ENSG00000155508	0.23355	6.01203	5.19231	3.65281e-05	8.38912e-05	0.359055	9337	CNOT8	CCR4-NOT transcription complex subunit 8 [Source:HGNC Symbol;Acc:HGNC:9207]	5	154857553	154876793	1
ENSG00000136819	0.288252	4.93938	5.18982	3.67434e-05	8.4345e-05	0.527669	51759	C9orf78	chromosome 9 open reading frame 78 [Source:HGNC Symbol;Acc:HGNC:24932]	9	129827290	129835863	-1
ENSG00000124201	0.254061	5.35888	5.18934	3.67856e-05	8.44317e-05	0.447186	57169	ZNFX1	zinc finger NFX1-type containing 1 [Source:HGNC Symbol;Acc:HGNC:29271]	20	49237946	49278426	-1
ENSG00000117360	0.251498	5.74135	5.1892	3.67972e-05	8.44479e-05	0.386496	9129	PRPF3	pre-mRNA processing factor 3 [Source:HGNC Symbol;Acc:HGNC:17348]	1	150321476	150353195	1
ENSG00000099942	-0.185966	7.77351	-5.15519	3.98821e-05	9.1109e-05	0.140712	1399	CRKL	CRK like proto-oncogene, adaptor protein [Source:HGNC Symbol;Acc:HGNC:2363]	22	20917426	20953749	1
ENSG00000105771	0.229807	5.46158	5.14091	4.12533e-05	9.40265e-05	0.313928	56006	SMG9	SMG9, nonsense mediated mRNA decay factor [Source:HGNC Symbol;Acc:HGNC:25763]	19	43727992	43754990	-1
ENSG00000107581	0.177928	9.12465	5.11319	4.40548e-05	0.000100003	-0.0296995	8661	EIF3A	eukaryotic translation initiation factor 3 subunit A [Source:HGNC Symbol;Acc:HGNC:3271]	10	119033670	119080823	-1
ENSG00000092199	0.182879	9.14378	5.10375	4.50524e-05	0.00010206	-0.0531855	3183	HNRNPC	heterogeneous nuclear ribonucleoprotein C (C1/C2) [Source:HGNC Symbol;Acc:HGNC:5035]	14	21209136	21269494	-1
ENSG00000215251	0.245502	5.18338	5.09721	4.57571e-05	0.000103607	0.257887	60493	FASTKD5	FAST kinase domains 5 [Source:HGNC Symbol;Acc:HGNC:25790]	20	3146519	3159897	-1
ENSG00000136381	0.191352	7.56783	5.09637	4.58488e-05	0.000103753	0.00913577	3658	IREB2	iron responsive element binding protein 2 [Source:HGNC Symbol;Acc:HGNC:6115]	15	78437431	78501456	1
ENSG00000164587	0.20902	8.17146	5.09549	4.59445e-05	0.00010392	-0.0266947	6208	RPS14	ribosomal protein S14 [Source:HGNC Symbol;Acc:HGNC:10387]	5	150443190	150449756	-1
ENSG00000198000	0.299736	5.16664	5.08679	4.69028e-05	0.000105961	0.235484	55035	NOL8	nucleolar protein 8 [Source:HGNC Symbol;Acc:HGNC:23387]	9	92297358	92325636	-1
ENSG00000125107	0.159869	8.88498	5.07685	4.80222e-05	0.000108284	-0.106686	23019	CNOT1	CCR4-NOT transcription complex subunit 1 [Source:HGNC Symbol;Acc:HGNC:7877]	16	58519951	58629886	-1
ENSG00000127993	0.339731	3.80872	5.0651	4.93805e-05	0.000111175	0.498462	84060	RBM48	RNA binding motif protein 48 [Source:HGNC Symbol;Acc:HGNC:21785]	7	92528773	92538005	1
ENSG00000152778	-0.243907	4.95366	-5.06447	4.94552e-05	0.000111304	0.235154	24138	IFIT5	interferon induced protein with tetratricopeptide repeats 5 [Source:HGNC Symbol;Acc:HGNC:13328]	10	89414586	89421001	1
ENSG00000173821	0.238294	5.95777	5.05961	5.00284e-05	0.000112527	0.046938	57674	RNF213	ring finger protein 213 [Source:HGNC Symbol;Acc:HGNC:14539]	17	80260866	80398786	1
ENSG00000122299	0.198325	5.98283	5.05888	5.01154e-05	0.000112709	0.042421	29066	ZC3H7A	zinc finger CCCH-type containing 7A [Source:HGNC Symbol;Acc:HGNC:30959]	16	11750586	11797267	-1
ENSG00000117133	0.21242	5.60756	5.05842	5.01708e-05	0.00011282	0.0926449	80135	RPF1	ribosome production factor 1 homolog [Source:HGNC Symbol;Acc:HGNC:30350]	1	84479259	84497790	1
ENSG00000140395	0.248114	5.6034	5.04107	5.22822e-05	0.000117346	0.0512121	80349	WDR61	WD repeat domain 61 [Source:HGNC Symbol;Acc:HGNC:30300]	15	78277835	78299794	-1
ENSG00000152147	0.282198	4.56583	5.02476	5.43486e-05	0.000121558	0.213107	79833	GEMIN6	gem nuclear organelle associated protein 6 [Source:HGNC Symbol;Acc:HGNC:20044]	2	38751534	38785000	1
ENSG00000101161	0.176046	6.66093	5.02474	5.43511e-05	0.000121558	-0.105227	24148	PRPF6	pre-mRNA processing factor 6 [Source:HGNC Symbol;Acc:HGNC:15860]	20	63981135	64033100	1
ENSG00000128191	0.235988	6.42821	5.01974	5.50014e-05	0.000122969	-0.0985978	54487 100302197 100500860	DGCR8	DGCR8 microprocessor complex subunit [Source:HGNC Symbol;Acc:HGNC:2847]	22	20080232	20111877	1
ENSG00000123737	0.193407	6.91295	5.01846	5.51683e-05	0.000123313	-0.13817	5393	EXOSC9	exosome component 9 [Source:HGNC Symbol;Acc:HGNC:9137]	4	121801317	121817021	1
ENSG00000114767	0.293434	5.20228	5.01592	5.55028e-05	0.000124002	0.0584271	9136	RRP9	ribosomal RNA processing 9, small subunit (SSU) processome component, homolog (yeast) [Source:HGNC Symbol;Acc:HGNC:16829]	3	51933430	51941941	-1
ENSG00000150773	-0.445519	2.614	-5.00992	5.63007e-05	0.0001257	0.716651	120379	PIH1D2	PIH1 domain containing 2 [Source:HGNC Symbol;Acc:HGNC:25210]	11	112064010	112074274	-1
ENSG00000063046	-0.169652	8.60684	-5.00963	5.63398e-05	0.000125769	-0.253773	1975	EIF4B	eukaryotic translation initiation factor 4B [Source:HGNC Symbol;Acc:HGNC:3285]	12	53006158	53042209	1
ENSG00000186468	0.205658	8.66033	4.99753	5.79853e-05	0.000129219	-0.287272	6228	RPS23	ribosomal protein S23 [Source:HGNC Symbol;Acc:HGNC:10410]	5	82273358	82278577	-1
ENSG00000149532	0.172479	6.54863	4.98805	5.93082e-05	0.000132007	-0.184759	79869	CPSF7	cleavage and polyadenylation specific factor 7 [Source:HGNC Symbol;Acc:HGNC:30098]	11	61402641	61430031	-1
ENSG00000144028	0.159334	8.62846	4.98473	5.97786e-05	0.000132945	-0.316356	23020	SNRNP200	small nuclear ribonucleoprotein U5 subunit 200 [Source:HGNC Symbol;Acc:HGNC:30859]	2	96274336	96305515	-1
ENSG00000151065	0.291028	4.01083	4.9823	6.01261e-05	0.000133655	0.247277	196513	DCP1B	decapping mRNA 1B [Source:HGNC Symbol;Acc:HGNC:24451]	12	1946054	2004535	-1
ENSG00000011376	0.204906	5.93662	4.97619	6.10068e-05	0.00013547	-0.15091	23395	LARS2	leucyl-tRNA synthetase 2, mitochondrial [Source:HGNC Symbol;Acc:HGNC:17095]	3	45388506	45549421	1
ENSG00000080802	0.263588	4.73213	4.96804	6.22023e-05	0.000137979	0.0391917	4850	CNOT4	CCR4-NOT transcription complex subunit 4 [Source:HGNC Symbol;Acc:HGNC:7880]	7	135361795	135510127	-1
ENSG00000175581	-0.263037	4.41812	-4.95423	6.42821e-05	0.00014236	0.0920713	51642	MRPL48	mitochondrial ribosomal protein L48 [Source:HGNC Symbol;Acc:HGNC:16653]	11	73787316	73865133	1
ENSG00000111196	0.251144	5.00082	4.94852	6.51626e-05	0.000144158	-0.0642608	55110	MAGOHB	mago homolog B, exon junction complex core component [Source:HGNC Symbol;Acc:HGNC:25504]	12	10604190	10613623	-1
ENSG00000114686	0.236036	6.98144	4.93034	6.80485e-05	0.000150158	-0.355058	11222	MRPL3	mitochondrial ribosomal protein L3 [Source:HGNC Symbol;Acc:HGNC:10379]	3	131462212	131502983	-1
ENSG00000113593	0.241934	5.75201	4.9295	6.8184e-05	0.000150404	-0.239225	23398	PPWD1	peptidylprolyl isomerase domain and WD repeat containing 1 [Source:HGNC Symbol;Acc:HGNC:28954]	5	65563236	65587549	1
ENSG00000125352	0.321091	3.7386	4.92103	6.95763e-05	0.00015332	0.170764	7737	RNF113A	ring finger protein 113A [Source:HGNC Symbol;Acc:HGNC:12974]	X	119870475	119871827	-1
ENSG00000165506	-0.239556	5.34132	-4.92096	6.95868e-05	0.00015332	-0.185588	55172	DNAAF2	dynein axonemal assembly factor 2 [Source:HGNC Symbol;Acc:HGNC:20188]	14	49625174	49635230	-1
ENSG00000167881	0.211319	5.65171	4.91591	7.04299e-05	0.000155034	-0.257045	6730	SRP68	signal recognition particle 68 [Source:HGNC Symbol;Acc:HGNC:11302]	17	76038775	76072653	-1
ENSG00000104852	-0.21777	6.93711	-4.90759	7.18416e-05	0.000157812	-0.40391	6625	SNRNP70	small nuclear ribonucleoprotein U1 subunit 70 [Source:HGNC Symbol;Acc:HGNC:11150]	19	49085419	49108605	1
ENSG00000087269	0.24456	6.43127	4.90636	7.20526e-05	0.000158239	-0.371936	8602	NOP14	NOP14 nucleolar protein [Source:HGNC Symbol;Acc:HGNC:16821]	4	2937933	2963385	-1
ENSG00000087077	-0.247829	5.38176	-4.88755	7.53602e-05	0.000165102	-0.272973	7205 102466755	TRIP6	thyroid hormone receptor interactor 6 [Source:HGNC Symbol;Acc:HGNC:12311]	7	100867138	100873454	1
ENSG00000120800	0.352827	7.50573	4.88651	7.55473e-05	0.000165473	-0.49317	27340	UTP20	UTP20, small subunit processome component [Source:HGNC Symbol;Acc:HGNC:17897]	12	101280109	101386616	1
ENSG00000129351	0.156779	9.21788	4.87977	7.67738e-05	0.000167966	-0.595319	3609	ILF3	interleukin enhancer binding factor 3 [Source:HGNC Symbol;Acc:HGNC:6038]	19	10654261	10692417	1
ENSG00000063244	0.21125	7.87933	4.87513	7.76288e-05	0.000169719	-0.54121	11338	U2AF2	U2 small nuclear RNA auxiliary factor 2 [Source:HGNC Symbol;Acc:HGNC:23156]	19	55654146	55674715	1
ENSG00000156313	0.395334	3.40206	4.87293	7.8037e-05	0.000170533	0.144279	6103	RPGR	retinitis pigmentosa GTPase regulator [Source:HGNC Symbol;Acc:HGNC:10295]	X	38269163	38327564	-1
ENSG00000076770	-0.25519	5.32345	-4.86949	7.868e-05	0.000171859	-0.306016	55796	MBNL3	muscleblind like splicing regulator 3 [Source:HGNC Symbol;Acc:HGNC:20564]	X	132369317	132489968	-1
ENSG00000130985	-0.162664	8.16865	-4.85907	8.06632e-05	0.000175867	-0.593868	7317	UBA1	ubiquitin like modifier activating enzyme 1 [Source:HGNC Symbol;Acc:HGNC:12469]	X	47190861	47215128	1
ENSG00000129084	0.195588	7.17877	4.84866	8.26945e-05	0.000179903	-0.564216	5682	PSMA1	proteasome subunit alpha 1 [Source:HGNC Symbol;Acc:HGNC:9530]	11	14504874	14643635	-1
ENSG00000198242	0.176398	6.67119	4.83963	8.44972e-05	0.000183467	-0.551972	6147	RPL23A	ribosomal protein L23a [Source:HGNC Symbol;Acc:HGNC:10317]	17	28719393	28724359	1
ENSG00000137776	0.239197	7.17377	4.83915	8.45938e-05	0.000183635	-0.587048	79811	SLTM	SAFB like transcription modulator [Source:HGNC Symbol;Acc:HGNC:20709]	15	58879045	58933653	-1
ENSG00000093167	-0.20767	5.87045	-4.8375	8.49277e-05	0.000184297	-0.470712	9209	LRRFIP2	LRR binding FLII interacting protein 2 [Source:HGNC Symbol;Acc:HGNC:6703]	3	37052656	37183689	-1
ENSG00000087087	0.290861	7.2364	4.83366	8.57116e-05	0.000185849	-0.604369	51593	SRRT	serrate, RNA effector molecule [Source:HGNC Symbol;Acc:HGNC:24101]	7	100875111	100888664	1
ENSG00000047315	0.177661	8.40269	4.83089	8.628e-05	0.000187017	-0.67592	5431	POLR2B	RNA polymerase II subunit B [Source:HGNC Symbol;Acc:HGNC:9188]	4	56977722	57031168	1
ENSG00000165819	0.192611	6.55413	4.82604	8.72859e-05	0.000189068	-0.575749	56339	METTL3	methyltransferase like 3 [Source:HGNC Symbol;Acc:HGNC:17563]	14	21498133	21511375	-1
ENSG00000132591	0.230903	5.04202	4.81809	8.89608e-05	0.000192498	-0.386717	26284	ERAL1	Era like 12S mitochondrial rRNA chaperone 1 [Source:HGNC Symbol;Acc:HGNC:3424]	17	28854938	28861067	1
ENSG00000139218	0.243722	7.16312	4.81531	8.95543e-05	0.000193738	-0.643928	9169	SCAF11	SR-related CTD associated factor 11 [Source:HGNC Symbol;Acc:HGNC:10784]	12	45919131	45992120	-1
ENSG00000166794	-0.19675	8.20948	-4.81417	8.97992e-05	0.000194202	-0.704181	5479	PPIB	peptidylprolyl isomerase B [Source:HGNC Symbol;Acc:HGNC:9255]	15	64155812	64163205	-1
ENSG00000070814	-0.240955	6.78896	-4.80551	9.16773e-05	0.000198083	-0.639474	6949	TCOF1	treacle ribosome biogenesis factor 1 [Source:HGNC Symbol;Acc:HGNC:11654]	5	150357639	150400308	1
ENSG00000074356	0.166446	6.62192	4.78279	9.67971e-05	0.000208338	-0.685279	55421	NCBP3	nuclear cap binding subunit 3 [Source:HGNC Symbol;Acc:HGNC:24612]	17	3802165	3846251	-1
ENSG00000115875	0.172644	8.07954	4.76742	0.000100423	0.000215629	-0.811903	6432	SRSF7	serine and arginine rich splicing factor 7 [Source:HGNC Symbol;Acc:HGNC:10789]	2	38743599	38751494	-1
ENSG00000147604	0.207921	6.32827	4.76717	0.000100483	0.000215734	-0.697873	6129	RPL7	ribosomal protein L7 [Source:HGNC Symbol;Acc:HGNC:10363]	8	73290267	73295789	-1
ENSG00000182004	0.221526	5.49442	4.76045	0.000102112	0.000219083	-0.607442	6635	SNRPE	small nuclear ribonucleoprotein polypeptide E [Source:HGNC Symbol;Acc:HGNC:11161]	1	203861603	203870550	1
ENSG00000100028	0.193714	7.11026	4.75985	0.00010226	0.000219374	-0.774228	6634	SNRPD3	small nuclear ribonucleoprotein D3 polypeptide [Source:HGNC Symbol;Acc:HGNC:11160]	22	24555503	24609980	1
ENSG00000155636	0.290847	4.22373	4.7278	0.000110415	0.000235643	-0.420026	129831	RBM45	RNA binding motif protein 45 [Source:HGNC Symbol;Acc:HGNC:24468]	2	178112424	178139011	1
ENSG00000213523	0.24025	4.89182	4.70782	0.000115829	0.000246477	-0.622191	10011	SRA1	steroid receptor RNA activator 1 [Source:HGNC Symbol;Acc:HGNC:11281]	5	140537340	140558252	-1
ENSG00000038358	0.171041	6.5154	4.70407	0.000116875	0.000248565	-0.866789	23644	EDC4	enhancer of mRNA decapping 4 [Source:HGNC Symbol;Acc:HGNC:17157]	16	67873023	67884503	1
ENSG00000088986	-0.20833	7.34815	-4.69187	0.000120342	0.000255365	-0.950467	8655	DYNLL1	dynein light chain LC8-type 1 [Source:HGNC Symbol;Acc:HGNC:15476]	12	120469850	120498493	1
ENSG00000072364	0.181483	7.56707	4.6895	0.000121029	0.000256679	-0.971315	27125	AFF4	AF4/FMR2 family member 4 [Source:HGNC Symbol;Acc:HGNC:17869]	5	132875379	132963634	-1
ENSG00000130810	0.333847	5.08843	4.68442	0.000122509	0.000259471	-0.719417	56342	PPAN	peter pan homolog (Drosophila) [Source:HGNC Symbol;Acc:HGNC:9227]	19	10106289	10111634	1
ENSG00000113360	0.189347	5.73101	4.68402	0.000122627	0.000259692	-0.827892	29102	DROSHA	drosha ribonuclease III [Source:HGNC Symbol;Acc:HGNC:17904]	5	31400497	31532196	-1
ENSG00000115816	0.274904	6.8651	4.68248	0.000123082	0.000260539	-0.945465	10153	CEBPZ	CCAAT/enhancer binding protein zeta [Source:HGNC Symbol;Acc:HGNC:24218]	2	37201612	37231713	-1
ENSG00000108256	0.187764	8.18309	4.67611	0.000124977	0.000264343	-1.03802	57532	NUFIP2	NUFIP2, FMR1 interacting protein 2 [Source:HGNC Symbol;Acc:HGNC:17634]	17	29255836	29294118	-1
ENSG00000214274	-0.752593	0.970497	-4.67573	0.000125089	0.000264551	0.379722	283	ANG	angiogenin [Source:HGNC Symbol;Acc:HGNC:483]	14	20684177	20698971	1
ENSG00000196793	0.346487	3.871	4.661	0.000129587	0.000273394	-0.491466	8187	ZNF239	zinc finger protein 239 [Source:HGNC Symbol;Acc:HGNC:13031]	10	43556344	43574618	-1
ENSG00000101811	0.25183	5.05152	4.64926	0.000133289	0.000280828	-0.796239	1478	CSTF2	cleavage stimulation factor subunit 2 [Source:HGNC Symbol;Acc:HGNC:2484]	X	100820359	100840932	1
ENSG00000148300	0.246469	4.83384	4.6397	0.000136378	0.000286765	-0.774357	57109	REXO4	REX4 homolog, 3'-5' exonuclease [Source:HGNC Symbol;Acc:HGNC:12820]	9	133406059	133418096	-1
ENSG00000134748	0.192962	6.11014	4.63299	0.000138594	0.000291142	-0.999112	84950	PRPF38A	pre-mRNA processing factor 38A [Source:HGNC Symbol;Acc:HGNC:25930]	1	52404564	52420839	1
ENSG00000100296	0.159297	6.57159	4.632	0.000138924	0.000291665	-1.04532	8563	THOC5	THO complex 5 [Source:HGNC Symbol;Acc:HGNC:19074]	22	29505879	29555216	-1
ENSG00000167005	0.186597	8.40647	4.62572	0.000141031	0.000295924	-1.17142	11051	NUDT21	nudix hydrolase 21 [Source:HGNC Symbol;Acc:HGNC:13870]	16	56429133	56452199	-1
ENSG00000149187	-0.155151	8.011	-4.62131	0.000142533	0.000298812	-1.1592	10658	CELF1	CUGBP, Elav-like family member 1 [Source:HGNC Symbol;Acc:HGNC:2549]	11	47465944	47565569	-1
ENSG00000107625	0.188623	5.71314	4.60934	0.000146687	0.000307114	-1.00564	79009	DDX50	DEAD-box helicase 50 [Source:HGNC Symbol;Acc:HGNC:17906]	10	68901278	68946847	1
ENSG00000175110	0.193032	5.60421	4.6051	0.000148187	0.000310007	-0.999583	56945	MRPS22	mitochondrial ribosomal protein S22 [Source:HGNC Symbol;Acc:HGNC:14508]	3	139005806	139357223	1
ENSG00000136854	-0.31781	3.49026	-4.60227	0.000149198	0.000311855	-0.513119	6812	STXBP1	syntaxin binding protein 1 [Source:HGNC Symbol;Acc:HGNC:11444]	9	127579370	127696115	1
ENSG00000171865	0.267129	4.841	4.59595	0.000151478	0.000316411	-0.881777	246243	RNASEH1	ribonuclease H1 [Source:HGNC Symbol;Acc:HGNC:18466]	2	3544793	3558616	-1
ENSG00000105248	-0.237875	4.33948	-4.59334	0.000152431	0.000318331	-0.759986	55702	CCDC94	coiled-coil domain containing 94 [Source:HGNC Symbol;Acc:HGNC:25518]	19	4247079	4269090	1
ENSG00000125457	0.319894	3.53736	4.5911	0.00015325	0.000319937	-0.570807	57409	MIF4GD	MIF4G domain containing [Source:HGNC Symbol;Acc:HGNC:24030]	17	75266228	75271227	-1
ENSG00000178252	-0.139169	7.98669	-4.5905	0.000153471	0.000320363	-1.23234	11180	WDR6	WD repeat domain 6 [Source:HGNC Symbol;Acc:HGNC:12758]	3	49007062	49015953	1
ENSG00000212643	0.389131	2.63781	4.58959	0.000153808	0.000320969	-0.327029		ZRSR1	zinc finger CCCH-type, RNA binding motif and serine/arginine rich 1 [Source:HGNC Symbol;Acc:HGNC:12456]	5	112891422	112893094	1
ENSG00000158417	0.28586	6.31736	4.57621	0.000158831	0.000330679	-1.15826	9669	EIF5B	eukaryotic translation initiation factor 5B [Source:HGNC Symbol;Acc:HGNC:30793]	2	99337353	99401326	1
ENSG00000140105	-0.182144	6.96327	-4.55945	0.000165352	0.000343388	-1.24617	7453	WARS	tryptophanyl-tRNA synthetase [Source:HGNC Symbol;Acc:HGNC:12729]	14	100333788	100376805	-1
ENSG00000141646	0.160189	7.21948	4.55254	0.000168122	0.000348645	-1.28135	4089	SMAD4	SMAD family member 4 [Source:HGNC Symbol;Acc:HGNC:6770]	18	51028394	51085045	1
ENSG00000108406	0.19033	6.46863	4.54963	0.000169302	0.00035082	-1.23579	79665	DHX40	DEAH-box helicase 40 [Source:HGNC Symbol;Acc:HGNC:18018]	17	59565525	59608345	1
ENSG00000161981	-0.205891	5.53434	-4.54849	0.000169765	0.000351554	-1.11825	79622	SNRNP25	small nuclear ribonucleoprotein U11/U12 subunit 25 [Source:HGNC Symbol;Acc:HGNC:14161]	16	53010	57669	1
ENSG00000130244	-0.439048	2.30369	-4.53559	0.000175107	0.000361865	-0.33764	147965	FAM98C	family with sequence similarity 98 member C [Source:HGNC Symbol;Acc:HGNC:27119]	19	38403135	38409088	1
ENSG00000144635	0.169245	6.73792	4.53505	0.000175338	0.000362224	-1.29209	51143	DYNC1LI1	dynein cytoplasmic 1 light intermediate chain 1 [Source:HGNC Symbol;Acc:HGNC:18745]	3	32525971	32570874	-1
ENSG00000048544	0.212026	5.39657	4.52703	0.000178748	0.000368706	-1.15456	55173	MRPS10	mitochondrial ribosomal protein S10 [Source:HGNC Symbol;Acc:HGNC:14502]	6	42206801	42217865	-1
ENSG00000146858	0.396679	3.11334	4.51973	0.00018191	0.000374943	-0.627956	92092	ZC3HAV1L	zinc finger CCCH-type containing, antiviral 1 like [Source:HGNC Symbol;Acc:HGNC:22423]	7	139025706	139036029	-1
ENSG00000166986	-0.177048	7.57247	-4.4999	0.000190789	0.000392053	-1.42743	4141 102465454	MARS	methionyl-tRNA synthetase [Source:HGNC Symbol;Acc:HGNC:6898]	12	57475445	57517569	1
ENSG00000047849	0.147745	7.25008	4.49082	0.000195001	0.000400015	-1.43215	4134	MAP4	microtubule associated protein 4 [Source:HGNC Symbol;Acc:HGNC:6862]	3	47850690	48089272	-1
ENSG00000163682	0.215427	5.63017	4.48842	0.000196132	0.000402247	-1.28546	6133	RPL9	ribosomal protein L9 [Source:HGNC Symbol;Acc:HGNC:10369]	4	39454124	39458948	-1
ENSG00000132485	0.163542	6.66983	4.48826	0.000196207	0.000402357	-1.40001	9406	ZRANB2	zinc finger RANBP2-type containing 2 [Source:HGNC Symbol;Acc:HGNC:13058]	1	71063291	71081297	-1
ENSG00000160679	0.155316	6.89068	4.48208	0.000199141	0.000408065	-1.43048	26097	CHTOP	chromatin target of PRMT1 [Source:HGNC Symbol;Acc:HGNC:24511]	1	153633982	153646306	1
ENSG00000091009	0.181052	6.83025	4.47855	0.000200837	0.000411187	-1.43501	54439	RBM27	RNA binding motif protein 27 [Source:HGNC Symbol;Acc:HGNC:29243]	5	146203600	146289132	1
ENSG00000124562	0.2101	6.35612	4.47629	0.000201932	0.000413294	-1.40279	6631	SNRPC	small nuclear ribonucleoprotein polypeptide C [Source:HGNC Symbol;Acc:HGNC:11157]	6	34757406	34773794	1
ENSG00000113048	-0.16495	6.94298	-4.46352	0.000208229	0.00042522	-1.47656	23107	MRPS27	mitochondrial ribosomal protein S27 [Source:HGNC Symbol;Acc:HGNC:14512]	5	72219409	72320646	-1
ENSG00000168488	-0.295965	4.63846	-4.44693	0.000216707	0.000441249	-1.1827	11273	ATXN2L	ataxin 2 like [Source:HGNC Symbol;Acc:HGNC:31326]	16	28823035	28837237	1
ENSG00000106246	0.200743	5.86626	4.43138	0.000224966	0.000456987	-1.45641	26024	PTCD1	pentatricopeptide repeat domain 1 [Source:HGNC Symbol;Acc:HGNC:22198]	7	99416739	99466163	-1
ENSG00000125970	0.186133	7.2985	4.4217	0.000230265	0.000467152	-1.60207	22913	RALY	RALY heterogeneous nuclear ribonucleoprotein [Source:HGNC Symbol;Acc:HGNC:15921]	20	33993646	34108308	1
ENSG00000130119	0.325263	5.06089	4.42109	0.000230603	0.000467738	-1.34956	54552	GNL3L	G protein nucleolar 3 like [Source:HGNC Symbol;Acc:HGNC:25553]	X	54530211	54561071	1
ENSG00000163319	0.224709	5.00127	4.41806	0.000232291	0.000470859	-1.34383	51023	MRPS18C	mitochondrial ribosomal protein S18C [Source:HGNC Symbol;Acc:HGNC:16633]	4	83455932	83469735	1
ENSG00000132467	0.211123	4.945	4.41076	0.000236407	0.00047864	-1.34974	57050	UTP3	UTP3, small subunit processome component homolog (S. cerevisiae) [Source:HGNC Symbol;Acc:HGNC:24477]	4	70688479	70690551	1
ENSG00000145216	0.187865	6.25275	4.40851	0.000237686	0.000481179	-1.5561	81608	FIP1L1	factor interacting with PAPOLA and CPSF1 [Source:HGNC Symbol;Acc:HGNC:19124]	4	53377643	53460861	1
ENSG00000143793	-0.294492	3.89819	-4.39535	0.000245331	0.000495967	-1.12234	79169	C1orf35	chromosome 1 open reading frame 35 [Source:HGNC Symbol;Acc:HGNC:19032]	1	228100726	228105411	-1
ENSG00000169249	0.427215	2.28298	4.39167	0.000247516	0.000500172	-0.704191	8233	ZRSR2	zinc finger CCCH-type, RNA binding motif and serine/arginine rich 2 [Source:HGNC Symbol;Acc:HGNC:23019]	X	15790472	15823260	1
ENSG00000198874	0.205225	5.00029	4.38622	0.000250784	0.000506399	-1.42016	55253	TYW1	tRNA-yW synthesizing protein 1 homolog [Source:HGNC Symbol;Acc:HGNC:25598]	7	66995173	67239519	1
ENSG00000196504	0.188594	8.12979	4.38188	0.000253416	0.000511331	-1.74543	55660	PRPF40A	pre-mRNA processing factor 40 homolog A [Source:HGNC Symbol;Acc:HGNC:16463]	2	152651593	152717997	-1
ENSG00000055609	0.188566	6.60052	4.36808	0.000261972	0.000527473	-1.68477	58508	KMT2C	lysine methyltransferase 2C [Source:HGNC Symbol;Acc:HGNC:13726]	7	152134922	152436005	-1
ENSG00000132603	0.259721	5.72004	4.36499	0.000263924	0.000531116	-1.59693	51388	NIP7	NIP7, nucleolar pre-rRNA processing protein [Source:HGNC Symbol;Acc:HGNC:24328]	16	69339430	69343111	1
ENSG00000077348	0.369991	3.70273	4.35789	0.000268477	0.000539598	-1.17819	56915	EXOSC5	exosome component 5 [Source:HGNC Symbol;Acc:HGNC:24662]	19	41386374	41397479	-1
ENSG00000259956	-0.158271	7.14295	-4.357	0.00026905	0.000540578	-1.74651	29890	RBM15B	RNA binding motif protein 15B [Source:HGNC Symbol;Acc:HGNC:24303]	3	51391268	51397908	1
ENSG00000107614	0.269054	4.38317	4.35125	0.000272798	0.000547702	-1.36739	1787	TRDMT1	tRNA aspartic acid methyltransferase 1 [Source:HGNC Symbol;Acc:HGNC:2977]	10	17142254	17202054	-1
ENSG00000167088	0.195277	6.76251	4.34652	0.000275925	0.000553689	-1.74887	6632	SNRPD1	small nuclear ribonucleoprotein D1 polypeptide [Source:HGNC Symbol;Acc:HGNC:11158]	18	21612267	21633524	1
ENSG00000006744	0.170985	6.17307	4.3425	0.000278604	0.000558886	-1.70685	60528	ELAC2	elaC ribonuclease Z 2 [Source:HGNC Symbol;Acc:HGNC:14198]	17	12992391	13018187	-1
ENSG00000066654	0.172635	6.59935	4.32885	0.000287911	0.000576643	-1.77915	55623	THUMPD1	THUMP domain containing 1 [Source:HGNC Symbol;Acc:HGNC:23807]	16	20702816	20742084	-1
ENSG00000113460	0.240451	6.0106	4.32279	0.000292141	0.000584682	-1.73649	55299	BRIX1	BRX1, biogenesis of ribosomes [Source:HGNC Symbol;Acc:HGNC:24170]	5	34915376	34925996	1
ENSG00000100410	0.203741	5.76784	4.32211	0.000292619	0.000585578	-1.70652	84844	PHF5A	PHD finger protein 5A [Source:HGNC Symbol;Acc:HGNC:18000]	22	41459717	41468725	-1
ENSG00000089682	0.324349	4.04404	4.3183	0.000295317	0.000590727	-1.36274	55285	RBM41	RNA binding motif protein 41 [Source:HGNC Symbol;Acc:HGNC:25617]	X	107064420	107118823	-1
ENSG00000106355	0.219286	6.21341	4.31571	0.000297164	0.00059392	-1.77601	23658	LSM5	LSM5 homolog, U6 small nuclear RNA and mRNA degradation associated [Source:HGNC Symbol;Acc:HGNC:17162]	7	32485332	32495283	-1
ENSG00000119812	0.248325	5.71657	4.31323	0.000298938	0.000597153	-1.72109	25940	FAM98A	family with sequence similarity 98 member A [Source:HGNC Symbol;Acc:HGNC:24520]	2	33583658	33599382	-1
ENSG00000132676	0.161582	6.43906	4.30096	0.000307903	0.00061351	-1.83287	7818	DAP3	death associated protein 3 [Source:HGNC Symbol;Acc:HGNC:2673]	1	155687960	155739010	1
ENSG00000198791	0.168315	7.69059	4.29054	0.000315722	0.000628119	-1.94107	29883	CNOT7	CCR4-NOT transcription complex subunit 7 [Source:HGNC Symbol;Acc:HGNC:14101]	8	17224964	17246878	-1
ENSG00000104177	-0.209101	6.70743	-4.2818	0.000322434	0.00064085	-1.89756	50804	MYEF2	myelin expression factor 2 [Source:HGNC Symbol;Acc:HGNC:17940]	15	48134631	48178517	-1
ENSG00000181817	0.365575	3.5938	4.28001	0.000323826	0.000643414	-1.33634	84967	LSM10	LSM10, U7 small nuclear RNA associated [Source:HGNC Symbol;Acc:HGNC:17562]	1	36391238	36397892	-1
ENSG00000205937	0.19959	6.99944	4.27047	0.000331354	0.000657615	-1.94809	10921	RNPS1	RNA binding protein with serine rich domain 1 [Source:HGNC Symbol;Acc:HGNC:10080]	16	2253116	2268412	-1
ENSG00000182973	-0.186068	5.82235	-4.26543	0.000335397	0.000665221	-1.84477	25904	CNOT10	CCR4-NOT transcription complex subunit 10 [Source:HGNC Symbol;Acc:HGNC:23817]	3	32685145	32773875	1
ENSG00000135269	0.280714	4.73036	4.26241	0.000337845	0.000669797	-1.66232	26136	TES	testin LIM domain protein [Source:HGNC Symbol;Acc:HGNC:14620]	7	116210493	116258783	1
ENSG00000166902	0.183471	5.19595	4.25765	0.000341738	0.000677019	-1.76775	54948	MRPL16	mitochondrial ribosomal protein L16 [Source:HGNC Symbol;Acc:HGNC:14476]	11	59806135	59810872	-1
ENSG00000154743	0.298856	4.15299	4.25332	0.000345313	0.000683744	-1.54645	80746	TSEN2	tRNA splicing endonuclease subunit 2 [Source:HGNC Symbol;Acc:HGNC:28422]	3	12484432	12539623	1
ENSG00000124193	0.158847	8.04993	4.2492	0.000348755	0.000690272	-2.06061	6431	SRSF6	serine and arginine rich splicing factor 6 [Source:HGNC Symbol;Acc:HGNC:10788]	20	43457928	43464247	1
ENSG00000172432	0.201874	5.58777	4.24349	0.000353586	0.000698886	-1.86917	54676	GTPBP2	GTP binding protein 2 [Source:HGNC Symbol;Acc:HGNC:4670]	6	43605316	43629162	-1
ENSG00000067334	0.255393	6.53462	4.24329	0.000353755	0.000699042	-1.98039	30836	DNTTIP2	deoxynucleotidyltransferase terminal interacting protein 2 [Source:HGNC Symbol;Acc:HGNC:24013]	1	93866283	93879918	-1
ENSG00000146701	0.18528	7.01897	4.24128	0.00035547	0.000701514	-2.01952	4191	MDH2	malate dehydrogenase 2 [Source:HGNC Symbol;Acc:HGNC:6971]	7	76048051	76067508	1
ENSG00000131732	-0.220574	5.32991	-4.23081	0.000364545	0.00071793	-1.84868	84240	ZCCHC9	zinc finger CCHC-type containing 9 [Source:HGNC Symbol;Acc:HGNC:25424]	5	81301590	81313297	1
ENSG00000185085	0.195514	5.01284	4.21805	0.000375912	0.000738552	-1.8275	80789	INTS5	integrator complex subunit 5 [Source:HGNC Symbol;Acc:HGNC:29352]	11	62646848	62653302	-1
ENSG00000100316	0.136456	9.34251	4.21056	0.000382753	0.000750828	-2.21466	6122	RPL3	ribosomal protein L3 [Source:HGNC Symbol;Acc:HGNC:10332]	22	39312882	39320389	-1
ENSG00000160075	0.161994	6.88058	4.20969	0.000383554	0.000752243	-2.0863	29101	SSU72	SSU72 homolog, RNA polymerase II CTD phosphatase [Source:HGNC Symbol;Acc:HGNC:25016]	1	1541673	1574869	-1
ENSG00000273899	0.237838	4.41327	4.20301	0.000389773	0.000763178	-1.73085	79159	NOL12	nucleolar protein 12 [Source:HGNC Symbol;Acc:HGNC:28585]	22	37681673	37693478	1
ENSG00000076108	-0.183939	6.16858	-4.18517	0.000406876	0.000794045	-2.08076	11176	BAZ2A	bromodomain adjacent to zinc finger domain 2A [Source:HGNC Symbol;Acc:HGNC:962]	12	56595596	56636816	-1
ENSG00000117877	0.235631	5.12742	4.18317	0.000408845	0.000797796	-1.93442	10849	CD3EAP	CD3e molecule associated protein [Source:HGNC Symbol;Acc:HGNC:24219]	19	45406209	45410766	1
ENSG00000132541	-0.256955	3.87451	-4.18299	0.000409022	0.000797904	-1.62853	10247	RIDA	reactive intermediate imine deaminase A homolog [Source:HGNC Symbol;Acc:HGNC:16897]	8	98102344	98117241	-1
ENSG00000124787	0.410661	2.72628	4.17552	0.000416436	0.000811616	-1.34871	10799	RPP40	ribonuclease P/MRP subunit p40 [Source:HGNC Symbol;Acc:HGNC:20992]	6	4994732	5004063	-1
ENSG00000200795	-0.652193	5.2179	-4.16666	0.000425419	0.000828018	-1.96596	26835	RNU4-1	RNA, U4 small nuclear 1 [Source:HGNC Symbol;Acc:HGNC:10192]	12	120293097	120293237	-1
ENSG00000116752	0.200386	5.24241	4.15739	0.000435015	0.000845481	-2.01757	10286	BCAS2	breast carcinoma amplified sequence 2 [Source:HGNC Symbol;Acc:HGNC:975]	1	114567557	114581639	-1
ENSG00000137074	0.185116	5.18871	4.15011	0.000442706	0.000859285	-2.02492	54840	APTX	aprataxin [Source:HGNC Symbol;Acc:HGNC:15984]	9	32972606	33025168	-1
ENSG00000134815	0.250162	4.65551	4.14431	0.000448929	0.000870652	-1.92887	9704	DHX34	DEAH-box helicase 34 [Source:HGNC Symbol;Acc:HGNC:16719]	19	47349281	47382704	1
ENSG00000173674	0.197621	6.25254	4.12515	0.000470116	0.000909139	-2.23816	1964 107984923	EIF1AX	eukaryotic translation initiation factor 1A, X-linked [Source:HGNC Symbol;Acc:HGNC:3250]	X	20124518	20141844	-1
ENSG00000087274	0.132778	7.75149	4.12201	0.000473682	0.00091585	-2.34957	118	ADD1	adducin 1 [Source:HGNC Symbol;Acc:HGNC:243]	4	2843857	2930076	1
ENSG00000105865	0.242738	3.63422	4.12171	0.000474017	0.00091631	-1.72561	11062	DUS4L	dihydrouridine synthase 4 like [Source:HGNC Symbol;Acc:HGNC:21517]	7	107563484	107578464	1
ENSG00000076053	0.216212	4.73439	4.11126	0.000486089	0.000937926	-2.02537	10179	RBM7	RNA binding motif protein 7 [Source:HGNC Symbol;Acc:HGNC:9904]	11	114400030	114414203	1
ENSG00000159217	-0.153419	8.74255	-4.08762	0.000514535	0.000989495	-2.48287	10642	IGF2BP1	insulin like growth factor 2 mRNA binding protein 1 [Source:HGNC Symbol;Acc:HGNC:28866]	17	48997412	49055650	1
ENSG00000188613	-0.406875	2.00758	-4.08633	0.000516142	0.000992284	-1.33418	340719	NANOS1	nanos C2HC-type zinc finger 1 [Source:HGNC Symbol;Acc:HGNC:23044]	10	119029716	119033732	1
ENSG00000168439	-0.210525	7.6185	-4.07718	0.000527631	0.00101314	-2.44754	10963	STIP1	stress induced phosphoprotein 1 [Source:HGNC Symbol;Acc:HGNC:11387]	11	64185272	64204543	1
ENSG00000105202	0.162095	7.22492	4.06434	0.000544184	0.00104239	-2.45718	2091	FBL	fibrillarin [Source:HGNC Symbol;Acc:HGNC:3599]	19	39834458	39846414	-1
ENSG00000162437	-0.177831	5.51402	-4.06029	0.000549511	0.00105206	-2.29088	55225	RAVER2	ribonucleoprotein, PTB binding 2 [Source:HGNC Symbol;Acc:HGNC:25577]	1	64745095	64833232	1
ENSG00000165732	0.242933	8.28608	4.04717	0.000567128	0.00108339	-2.5588	9188	DDX21	DEAD-box helicase 21 [Source:HGNC Symbol;Acc:HGNC:2744]	10	68956128	68985073	1
ENSG00000165502	0.144966	6.64153	4.04382	0.00057171	0.00109126	-2.46714	6166	RPL36AL	ribosomal protein L36a like [Source:HGNC Symbol;Acc:HGNC:10346]	14	49618519	49620685	-1
ENSG00000178105	-0.237794	5.5021	-4.04289	0.000572994	0.00109361	-2.32913	1662	DDX10	DEAD-box helicase 10 [Source:HGNC Symbol;Acc:HGNC:2735]	11	108665025	108940930	1
ENSG00000037897	0.389671	3.30095	4.04187	0.000574398	0.00109595	-1.82842	4234	METTL1	methyltransferase like 1 [Source:HGNC Symbol;Acc:HGNC:7030]	12	57768471	57772793	-1
ENSG00000176624	-0.151751	6.82273	-4.03655	0.000581793	0.00110895	-2.49551	51320	MEX3C	mex-3 RNA binding family member C [Source:HGNC Symbol;Acc:HGNC:28040]	18	51174550	51218304	-1
ENSG00000163874	0.508167	1.4628	4.02295	0.000601136	0.00114272	-1.35602	80149 102465438	ZC3H12A	zinc finger CCCH-type containing 12A [Source:HGNC Symbol;Acc:HGNC:26259]	1	37474552	37484379	1
ENSG00000166938	0.225819	5.54777	4.01606	0.000611175	0.00116041	-2.4089	115752	DIS3L	DIS3 like exosome 3'-5' exoribonuclease [Source:HGNC Symbol;Acc:HGNC:28698]	15	66293217	66333898	1
ENSG00000161970	0.156415	7.64745	4.01596	0.000611322	0.00116057	-2.59783	6154	RPL26	ribosomal protein L26 [Source:HGNC Symbol;Acc:HGNC:10327]	17	8377520	8383213	-1
ENSG00000138709	0.257766	4.64047	4.01218	0.000616895	0.00117068	-2.24207	55132	LARP1B	La ribonucleoprotein domain family member 1B [Source:HGNC Symbol;Acc:HGNC:24704]	4	128061268	128222931	1
ENSG00000059378	-0.652874	0.664337	-4.01206	0.000617084	0.00117092	-1.13505	64761	PARP12	poly(ADP-ribose) polymerase family member 12 [Source:HGNC Symbol;Acc:HGNC:21919]	7	140023744	140063721	-1
ENSG00000096401	0.156773	7.54518	3.9991	0.0006366	0.00120554	-2.63225	988	CDC5L	cell division cycle 5 like [Source:HGNC Symbol;Acc:HGNC:1743]	6	44387525	44450426	1
ENSG00000213638	-0.509562	1.87814	-3.99628	0.000640936	0.00121315	-1.50713	113179	ADAT3	adenosine deaminase, tRNA specific 3 [Source:HGNC Symbol;Acc:HGNC:25151]	19	1905378	1913447	1
ENSG00000188976	-0.223688	6.1588	-3.99262	0.000646603	0.00122327	-2.54053	26155	NOC2L	NOC2 like nucleolar associated transcriptional repressor [Source:HGNC Symbol;Acc:HGNC:24517]	1	944204	959309	-1
ENSG00000204576	-0.169426	5.29654	-3.9923	0.00064709	0.00122407	-2.41582	80742	PRR3	proline rich 3 [Source:HGNC Symbol;Acc:HGNC:21149]	6	30556886	30563723	1
ENSG00000182173	-0.232652	4.06527	-3.99162	0.00064815	0.00122583	-2.1378	283989	TSEN54	tRNA splicing endonuclease subunit 54 [Source:HGNC Symbol;Acc:HGNC:27561]	17	75516060	75524739	1
ENSG00000179041	0.373281	4.67927	3.98592	0.000657095	0.00124175	-2.31486	23212	RRS1	ribosome biogenesis regulator homolog [Source:HGNC Symbol;Acc:HGNC:17083]	8	66429028	66430733	1
ENSG00000197223	0.333096	3.76468	3.97775	0.000670119	0.00126372	-2.10637	10438	C1D	C1D nuclear receptor corepressor [Source:HGNC Symbol;Acc:HGNC:29911]	2	68041130	68110948	-1
ENSG00000130227	0.137717	6.72261	3.97285	0.000678058	0.00127768	-2.64285	23039	XPO7	exportin 7 [Source:HGNC Symbol;Acc:HGNC:14108]	8	21919671	22006585	1
ENSG00000233927	0.293724	3.30796	3.966	0.000689313	0.00129747	-2.01016	6234	RPS28	ribosomal protein S28 [Source:HGNC Symbol;Acc:HGNC:10418]	19	8321158	8323340	1
ENSG00000091542	-0.154618	6.90577	-3.96571	0.000689798	0.00129812	-2.67058	54890	ALKBH5	alkB homolog 5, RNA demethylase [Source:HGNC Symbol;Acc:HGNC:25996]	17	18183078	18209954	1
ENSG00000171861	0.210375	4.46134	3.96513	0.000690753	0.00129979	-2.31183	55178	MRM3	mitochondrial rRNA methyltransferase 3 [Source:HGNC Symbol;Acc:HGNC:18485]	17	782273	792509	1
ENSG00000169972	-0.313214	3.83688	-3.96298	0.000694339	0.00130615	-2.14309	126789	PUSL1	pseudouridylate synthase-like 1 [Source:HGNC Symbol;Acc:HGNC:26914]	1	1308567	1311677	1
ENSG00000139910	-0.348945	3.22323	-3.96053	0.000698441	0.00131348	-1.98081	4857	NOVA1	NOVA alternative splicing regulator 1 [Source:HGNC Symbol;Acc:HGNC:7886]	14	26443093	26597754	-1
ENSG00000058673	0.143094	7.74742	3.9583	0.000702179	0.00131959	-2.74123	9877	ZC3H11A	zinc finger CCCH-type containing 11A [Source:HGNC Symbol;Acc:HGNC:29093]	1	203795654	203854124	1
ENSG00000099381	-0.277281	3.78428	-3.95725	0.000703963	0.00132255	-2.14419	9739	SETD1A	SET domain containing 1A [Source:HGNC Symbol;Acc:HGNC:29010]	16	30957294	30985116	1
ENSG00000138382	0.179235	5.87692	3.95627	0.000705624	0.00132528	-2.59895	29081	METTL5	methyltransferase like 5 [Source:HGNC Symbol;Acc:HGNC:25006]	2	169810081	169824931	-1
ENSG00000162642	0.177525	4.95951	3.93378	0.000744788	0.0013936	-2.49731	148423	C1orf52	chromosome 1 open reading frame 52 [Source:HGNC Symbol;Acc:HGNC:24871]	1	85249953	85259672	-1
ENSG00000101665	0.537373	1.36139	3.93029	0.000751054	0.00140449	-1.54857	4092	SMAD7	SMAD family member 7 [Source:HGNC Symbol;Acc:HGNC:6773]	18	48919853	48950711	-1
ENSG00000203791	-0.20466	4.8119	-3.91516	0.000778831	0.00145285	-2.50142	399818	METTL10	methyltransferase like 10 [Source:HGNC Symbol;Acc:HGNC:33787]	10	124748149	124791870	-1
ENSG00000129460	0.193019	5.14171	3.91126	0.000786167	0.00146596	-2.58741	25983	NGDN	neuroguidin [Source:HGNC Symbol;Acc:HGNC:20271]	14	23469688	23509862	1
ENSG00000095139	0.137028	7.69258	3.90502	0.000798025	0.0014869	-2.86512	372	ARCN1	archain 1 [Source:HGNC Symbol;Acc:HGNC:649]	11	118572390	118603033	1
ENSG00000107949	-0.162275	6.96353	-3.89664	0.000814241	0.00151548	-2.83908	56647	BCCIP	BRCA2 and CDKN1A interacting protein [Source:HGNC Symbol;Acc:HGNC:978]	10	125823546	125853695	1
ENSG00000071794	0.145367	7.09081	3.89061	0.000826098	0.00153574	-2.86366	6596	HLTF	helicase like transcription factor [Source:HGNC Symbol;Acc:HGNC:11099]	3	149030127	149086554	-1
ENSG00000166024	0.175506	5.02393	3.87726	0.000852999	0.00158296	-2.64494	27291	R3HCC1L	R3H domain and coiled-coil containing 1 like [Source:HGNC Symbol;Acc:HGNC:23512]	10	98134624	98244897	1
ENSG00000088038	-0.237854	4.39965	-3.87485	0.000857946	0.00159183	-2.50028	4849	CNOT3	CCR4-NOT transcription complex subunit 3 [Source:HGNC Symbol;Acc:HGNC:7879]	19	54137728	54155681	1
ENSG00000183258	0.15771	5.821	3.87132	0.000865237	0.00160426	-2.79367	51428	DDX41	DEAD-box helicase 41 [Source:HGNC Symbol;Acc:HGNC:18674]	5	177511577	177517469	-1
ENSG00000185946	0.265537	3.90477	3.87093	0.000866055	0.00160554	-2.39694	55599	RNPC3	RNA binding region (RNP1, RRM) containing 3 [Source:HGNC Symbol;Acc:HGNC:18666]	1	103525691	103555239	1
ENSG00000130299	-0.266172	4.03768	-3.85694	0.000895596	0.00165683	-2.4503	84705	GTPBP3	GTP binding protein 3 (mitochondrial) [Source:HGNC Symbol;Acc:HGNC:14880]	19	17334920	17342735	1
ENSG00000149136	-0.135147	8.65477	-3.84973	0.000911227	0.00168426	-3.04673	6749	SSRP1	structure specific recognition protein 1 [Source:HGNC Symbol;Acc:HGNC:11327]	11	57325985	57335877	-1
ENSG00000176444	0.156437	5.37	3.83573	0.000942323	0.00173886	-2.80827	1196	CLK2	CDC like kinase 2 [Source:HGNC Symbol;Acc:HGNC:2069]	1	155262868	155278491	-1
ENSG00000112110	0.231516	4.86341	3.82593	0.000964708	0.00177568	-2.73456	29074	MRPL18	mitochondrial ribosomal protein L18 [Source:HGNC Symbol;Acc:HGNC:14477]	6	159789812	159798436	1
ENSG00000134283	0.176403	6.23046	3.82035	0.000977699	0.00179837	-2.96338	51535	PPHLN1	periphilin 1 [Source:HGNC Symbol;Acc:HGNC:19369]	12	42238447	42459715	1
ENSG00000168807	0.164098	6.11157	3.81822	0.000982706	0.00180688	-2.95556	6645	SNTB2	syntrophin beta 2 [Source:HGNC Symbol;Acc:HGNC:11169]	16	69187129	69309052	1
ENSG00000167658	0.113745	11.1611	3.81428	0.000992029	0.00182261	-3.22706	1938	EEF2	eukaryotic translation elongation factor 2 [Source:HGNC Symbol;Acc:HGNC:3214]	19	3976056	3985469	-1
ENSG00000204351	-0.179403	5.48323	-3.80804	0.00100696	0.00184789	-2.88692	6499	SKIV2L	Ski2 like RNA helicase [Source:HGNC Symbol;Acc:HGNC:10898]	6	31959080	31969755	1
ENSG00000157110	0.34633	2.97491	3.80332	0.00101842	0.00186819	-2.30528	11030	RBPMS	RNA binding protein with multiple splicing [Source:HGNC Symbol;Acc:HGNC:19097]	8	30384479	30572261	1
ENSG00000128016	-0.675181	0.522031	-3.78379	0.00106718	0.00195141	-1.63833	7538	ZFP36	ZFP36 ring finger protein [Source:HGNC Symbol;Acc:HGNC:12862]	19	39406813	39409412	1
ENSG00000167118	0.166974	5.84163	3.77598	0.00108731	0.00198498	-3.02273	81605	URM1	ubiquitin related modifier 1 [Source:HGNC Symbol;Acc:HGNC:28378]	9	128371319	128392016	1
ENSG00000126070	0.16816	6.00116	3.77459	0.00109093	0.0019914	-3.04625	192669	AGO3	argonaute 3, RISC catalytic component [Source:HGNC Symbol;Acc:HGNC:18421]	1	35930718	36072500	1
ENSG00000082258	0.162892	6.75379	3.75646	0.0011393	0.0020747	-3.15958	905	CCNT2	cyclin T2 [Source:HGNC Symbol;Acc:HGNC:1600]	2	134918235	134959342	1
ENSG00000214026	0.204192	4.83517	3.74544	0.00116974	0.00212626	-2.91866	6150 107987373	MRPL23	mitochondrial ribosomal protein L23 [Source:HGNC Symbol;Acc:HGNC:10322]	11	1947278	1984522	1
ENSG00000039123	0.162982	7.36076	3.74354	0.00117507	0.00213513	-3.22912	23517	SKIV2L2	Ski2 like RNA helicase 2 [Source:HGNC Symbol;Acc:HGNC:18734]	5	55307760	55425581	1
ENSG00000153201	0.207832	8.14085	3.7431	0.0011763	0.00213717	-3.27457	5903	RANBP2	RAN binding protein 2 [Source:HGNC Symbol;Acc:HGNC:9848]	2	108719481	108785811	1
ENSG00000179409	0.165299	5.68033	3.74231	0.00117853	0.00214025	-3.07967	50628	GEMIN4	gem nuclear organelle associated protein 4 [Source:HGNC Symbol;Acc:HGNC:15717]	17	744414	753999	-1
ENSG00000074201	0.131743	6.85823	3.73433	0.00120123	0.0021787	-3.21902	1207	CLNS1A	chloride nucleotide-sensitive channel 1A [Source:HGNC Symbol;Acc:HGNC:2080]	11	77514936	77637805	-1
ENSG00000134744	-0.15083	6.3403	-3.72758	0.00122077	0.00221182	-3.19046	23318	ZCCHC11	zinc finger CCHC-type containing 11 [Source:HGNC Symbol;Acc:HGNC:28981]	1	52408282	52553487	-1
ENSG00000139131	0.178297	5.15712	3.71687	0.00125243	0.00226399	-3.05108	51067	YARS2	tyrosyl-tRNA synthetase 2 [Source:HGNC Symbol;Acc:HGNC:24249]	12	32727490	32755902	-1
ENSG00000142864	0.127999	8.74322	3.71329	0.00126318	0.00228168	-3.37528	26135	SERBP1	SERPINE1 mRNA binding protein 1 [Source:HGNC Symbol;Acc:HGNC:17860]	1	67407810	67430415	-1
ENSG00000128394	0.798387	0.126271	3.70792	0.0012795	0.00231007	-1.75239	200316	APOBEC3F	apolipoprotein B mRNA editing enzyme catalytic subunit 3F [Source:HGNC Symbol;Acc:HGNC:17356]	22	39040604	39053910	1
ENSG00000117593	-0.148586	5.72554	-3.70355	0.00129292	0.00233275	-3.17275	55157	DARS2	aspartyl-tRNA synthetase 2, mitochondrial [Source:HGNC Symbol;Acc:HGNC:25538]	1	173824503	173858546	1
ENSG00000198692	0.211962	4.58311	3.70054	0.00130224	0.00234911	-2.96838	9086	EIF1AY	eukaryotic translation initiation factor 1A, Y-linked [Source:HGNC Symbol;Acc:HGNC:3252]	Y	20575725	20593154	1
ENSG00000179134	-0.175058	5.13706	-3.69644	0.00131505	0.00237041	-3.088	55095	SAMD4B	sterile alpha motif domain containing 4B [Source:HGNC Symbol;Acc:HGNC:25492]	19	39342396	39385710	1
ENSG00000161847	-0.272535	3.94552	-3.69564	0.00131758	0.00237452	-2.80753	125950	RAVER1	ribonucleoprotein, PTB binding 1 [Source:HGNC Symbol;Acc:HGNC:30296]	19	10316212	10333640	-1
ENSG00000095485	0.15748	5.38868	3.6956	0.00131771	0.00237452	-3.14292	55280	CWF19L1	CWF19-like 1, cell cycle control (S. pombe) [Source:HGNC Symbol;Acc:HGNC:25613]	10	100232298	100267680	-1
ENSG00000100722	0.135434	7.22638	3.68943	0.00133725	0.00240654	-3.34853	79882	ZC3H14	zinc finger CCCH-type containing 14 [Source:HGNC Symbol;Acc:HGNC:20509]	14	88562909	88627596	1
ENSG00000116791	-0.177705	5.30665	-3.68805	0.00134168	0.00241406	-3.13967	1429	CRYZ	crystallin zeta [Source:HGNC Symbol;Acc:HGNC:2419]	1	74705482	74733408	-1
ENSG00000182196	0.164623	6.10821	3.68249	0.00135962	0.00244402	-3.276	51329	ARL6IP4	ADP ribosylation factor like GTPase 6 interacting protein 4 [Source:HGNC Symbol;Acc:HGNC:18076]	12	122980060	122982913	1
ENSG00000100320	-0.118771	7.91593	-3.68223	0.00136044	0.00244503	-3.40411	23543	RBFOX2	RNA binding protein, fox-1 homolog 2 [Source:HGNC Symbol;Acc:HGNC:9906]	22	35738736	36028425	-1
ENSG00000105193	0.249093	5.71827	3.67577	0.00138159	0.00247905	-3.24287	6217	RPS16	ribosomal protein S16 [Source:HGNC Symbol;Acc:HGNC:10396]	19	39433207	39435948	-1
ENSG00000141076	0.183426	5.22461	3.66704	0.00141068	0.00252702	-3.18117	84916	UTP4	UTP4, small subunit processome component [Source:HGNC Symbol;Acc:HGNC:1983]	16	69131291	69231130	1
ENSG00000143314	0.205449	4.26752	3.66654	0.00141235	0.0025297	-2.97217	79590	MRPL24	mitochondrial ribosomal protein L24 [Source:HGNC Symbol;Acc:HGNC:14037]	1	156737303	156741590	-1
ENSG00000143486	0.141288	5.62778	3.65688	0.00144529	0.0025843	-3.27276	1939	EIF2D	eukaryotic translation initiation factor 2D [Source:HGNC Symbol;Acc:HGNC:6583]	1	206571292	206612463	-1
ENSG00000122687	0.188551	5.23704	3.64421	0.00148962	0.00265781	-3.2372	29960	MRM2	mitochondrial rRNA methyltransferase 2 [Source:HGNC Symbol;Acc:HGNC:16352]	7	2234231	2242198	-1
ENSG00000166441	0.13455	8.27168	3.63864	0.00150953	0.00269055	-3.52734	6157	RPL27A	ribosomal protein L27a [Source:HGNC Symbol;Acc:HGNC:10329]	11	8682411	8714759	1
ENSG00000131652	0.172044	5.21932	3.63675	0.00151633	0.00270216	-3.25119	79228	THOC6	THO complex 6 [Source:HGNC Symbol;Acc:HGNC:28369]	16	3024027	3027755	1
ENSG00000100416	0.165425	5.61343	3.63079	0.00153803	0.00273749	-3.33207	55687	TRMU	tRNA 5-methylaminomethyl-2-thiouridylate methyltransferase [Source:HGNC Symbol;Acc:HGNC:25481]	22	46330875	46357340	1
ENSG00000102738	0.169314	4.71731	3.61687	0.00158988	0.00282608	-3.19489	10240	MRPS31	mitochondrial ribosomal protein S31 [Source:HGNC Symbol;Acc:HGNC:16632]	13	40729135	40771173	-1
ENSG00000176102	0.165517	6.17941	3.59487	0.0016754	0.00296947	-3.48958	1479	CSTF3	cleavage stimulation factor subunit 3 [Source:HGNC Symbol;Acc:HGNC:2485]	11	33077188	33162371	-1
ENSG00000096384	0.14337	10.6073	3.59076	0.00169186	0.00299708	-3.73509	3326	HSP90AB1	heat shock protein 90 alpha family class B member 1 [Source:HGNC Symbol;Acc:HGNC:5258]	6	44246166	44253888	1
ENSG00000179988	0.349532	3.13188	3.58581	0.00171189	0.00302793	-2.86102	118672	PSTK	phosphoseryl-tRNA kinase [Source:HGNC Symbol;Acc:HGNC:28578]	10	122954381	122997513	1
ENSG00000167272	-0.204318	4.27182	-3.58273	0.00172451	0.0030491	-3.159	51367	POP5	POP5 homolog, ribonuclease P/MRP subunit [Source:HGNC Symbol;Acc:HGNC:17689]	12	120578764	120581398	-1
ENSG00000197756	0.170032	8.6745	3.5814	0.00172995	0.00305814	-3.68204	6168	RPL37A	ribosomal protein L37a [Source:HGNC Symbol;Acc:HGNC:10348]	2	216498189	216579180	1
ENSG00000106682	0.144406	7.65162	3.58107	0.00173134	0.00306032	-3.62804	7458	EIF4H	eukaryotic translation initiation factor 4H [Source:HGNC Symbol;Acc:HGNC:12741]	7	74174245	74197101	1
ENSG00000137073	0.150661	6.05906	3.57973	0.00173684	0.00306948	-3.51149	55833	UBAP2	ubiquitin associated protein 2 [Source:HGNC Symbol;Acc:HGNC:14185]	9	33921693	34048949	-1
ENSG00000107864	0.53114	1.01149	3.57368	0.00176202	0.00310964	-2.29195	22849	CPEB3	cytoplasmic polyadenylation element binding protein 3 [Source:HGNC Symbol;Acc:HGNC:21746]	10	92046692	92291087	-1
ENSG00000174231	-0.124216	8.69487	-3.57004	0.00177734	0.00313492	-3.70822	10594	PRPF8	pre-mRNA processing factor 8 [Source:HGNC Symbol;Acc:HGNC:17340]	17	1650629	1684882	-1
ENSG00000100601	0.215828	4.21575	3.56905	0.00178151	0.00314111	-3.18792	8846	ALKBH1	alkB homolog 1, histone H2A dioxygenase [Source:HGNC Symbol;Acc:HGNC:17911]	14	77672404	77708020	-1
ENSG00000074266	0.145486	5.24059	3.56731	0.00178891	0.00315299	-3.41736	8726 102465452	EED	embryonic ectoderm development [Source:HGNC Symbol;Acc:HGNC:3188]	11	86244544	86278813	1
ENSG00000257218	0.131034	7.4194	3.56659	0.00179198	0.00315752	-3.64835	283459	GATC	glutamyl-tRNA amidotransferase subunit C [Source:HGNC Symbol;Acc:HGNC:25068]	12	120446438	120463749	1
ENSG00000169957	-0.159961	5.67028	-3.56058	0.00181778	0.00319851	-3.49979	79724	ZNF768	zinc finger protein 768 [Source:HGNC Symbol;Acc:HGNC:26273]	16	30524001	30526821	-1
ENSG00000091732	0.171851	5.55063	3.55884	0.00182528	0.00320963	-3.49079	51530	ZC3HC1	zinc finger C3HC-type containing 1 [Source:HGNC Symbol;Acc:HGNC:29913]	7	130018286	130051451	-1
ENSG00000067704	0.148975	7.15874	3.55676	0.00183432	0.0032243	-3.65565	55699	IARS2	isoleucyl-tRNA synthetase 2, mitochondrial [Source:HGNC Symbol;Acc:HGNC:29685]	1	220094102	220148041	1
ENSG00000064607	-0.130063	7.09038	-3.54885	0.00186913	0.00328036	-3.66811	10147	SUGP2	SURP and G-patch domain containing 2 [Source:HGNC Symbol;Acc:HGNC:18641]	19	18990888	19034023	-1
ENSG00000101104	-0.306308	2.97205	-3.54817	0.00187217	0.00328538	-2.88566	80336	PABPC1L	poly(A) binding protein cytoplasmic 1 like [Source:HGNC Symbol;Acc:HGNC:15797]	20	44910062	44959035	1
ENSG00000111596	0.145389	6.83904	3.51875	0.0020076	0.00350458	-3.72354	4848	CNOT2	CCR4-NOT transcription complex subunit 2 [Source:HGNC Symbol;Acc:HGNC:7878]	12	70242994	70354993	1
ENSG00000123064	-0.209234	5.94309	-3.51811	0.00201064	0.00350923	-3.63594	79039	DDX54	DEAD-box helicase 54 [Source:HGNC Symbol;Acc:HGNC:20084]	12	113157174	113185479	-1
ENSG00000148773	-0.136075	8.35915	-3.51112	0.00204428	0.00356565	-3.82873	4288	MKI67	marker of proliferation Ki-67 [Source:HGNC Symbol;Acc:HGNC:7107]	10	128096659	128126385	-1
ENSG00000136270	0.171899	6.4041	3.49895	0.00210414	0.00366064	-3.73568	9238	TBRG4	transforming growth factor beta regulator 4 [Source:HGNC Symbol;Acc:HGNC:17443]	7	45100100	45112047	-1
ENSG00000113658	0.131576	7.54201	3.49469	0.00212545	0.00369365	-3.8231	4090	SMAD5	SMAD family member 5 [Source:HGNC Symbol;Acc:HGNC:6771]	5	136132845	136188747	1
ENSG00000188529	0.134996	8.16473	3.49387	0.0021296	0.00369985	-3.85991	10772	SRSF10	serine and arginine rich splicing factor 10 [Source:HGNC Symbol;Acc:HGNC:16713]	1	23964804	23980927	-1
ENSG00000272886	0.125355	5.99418	3.48774	0.00216075	0.00374985	-3.71806	55802	DCP1A	decapping mRNA 1A [Source:HGNC Symbol;Acc:HGNC:18714]	3	53283428	53347610	-1
ENSG00000070366	-0.140475	5.60902	-3.48527	0.00217344	0.00376923	-3.66613	23293	SMG6	SMG6, nonsense mediated mRNA decay factor [Source:HGNC Symbol;Acc:HGNC:17809]	17	2059839	2303771	-1
ENSG00000149577	0.209571	4.35416	3.48233	0.00218864	0.00379478	-3.42411	51092	SIDT2	SID1 transmembrane family member 2 [Source:HGNC Symbol;Acc:HGNC:24272]	11	117178733	117197445	1
ENSG00000100461	0.11711	6.60165	3.47921	0.00220489	0.00382016	-3.79789	55147	RBM23	RNA binding motif protein 23 [Source:HGNC Symbol;Acc:HGNC:20155]	14	22893206	22919184	-1
ENSG00000145220	0.249056	4.99128	3.47817	0.0022103	0.00382849	-3.57807	55646	LYAR	Ly1 antibody reactive [Source:HGNC Symbol;Acc:HGNC:26021]	4	4267701	4290169	-1
ENSG00000152234	0.11938	9.23159	3.47021	0.00225236	0.0038967	-3.96539	498	ATP5A1	ATP synthase, H+ transporting, mitochondrial F1 complex, alpha subunit 1, cardiac muscle [Source:HGNC Symbol;Acc:HGNC:823]	18	46080248	46104334	-1
ENSG00000080824	0.185077	9.10033	3.46957	0.00225576	0.00390188	-3.96171	3320	HSP90AA1	heat shock protein 90 alpha family class A member 1 [Source:HGNC Symbol;Acc:HGNC:5253]	14	102080738	102139699	-1
ENSG00000143368	0.179919	5.31444	3.46373	0.00228716	0.00395332	-3.67244	10262	SF3B4	splicing factor 3b subunit 4 [Source:HGNC Symbol;Acc:HGNC:10771]	1	149923317	149928344	-1
ENSG00000140259	0.138543	5.91137	3.46369	0.00228741	0.00395338	-3.76363	4236	MFAP1	microfibrillar associated protein 1 [Source:HGNC Symbol;Acc:HGNC:7032]	15	43804492	43824802	-1
ENSG00000214944	0.290893	3.4688	3.44669	0.00238124	0.00410509	-3.27649	64283	ARHGEF28	Rho guanine nucleotide exchange factor 28 [Source:HGNC Symbol;Acc:HGNC:30322]	5	73626158	73941993	1
ENSG00000124789	0.119334	7.67434	3.44324	0.0024008	0.00413655	-3.95003	9972	NUP153	nucleoporin 153 [Source:HGNC Symbol;Acc:HGNC:8062]	6	17615035	17706834	-1
ENSG00000205531	0.135862	7.46535	3.42866	0.00248494	0.00426927	-3.97173	4676	NAP1L4	nucleosome assembly protein 1 like 4 [Source:HGNC Symbol;Acc:HGNC:7640]	11	2944431	2992377	-1
ENSG00000136243	0.167473	5.46416	3.42841	0.00248644	0.00427094	-3.77984	11097	NUPL2	nucleoporin like 2 [Source:HGNC Symbol;Acc:HGNC:17010]	7	23181827	23201011	1
ENSG00000150316	-0.136715	5.9541	-3.41681	0.00255551	0.00438084	-3.87375	51503	CWC15	CWC15 spliceosome-associated protein [Source:HGNC Symbol;Acc:HGNC:26939]	11	94962622	94973612	-1
ENSG00000142207	0.173096	6.37014	3.41641	0.00255789	0.00438453	-3.92387	9875	URB1	URB1 ribosome biogenesis 1 homolog (S. cerevisiae) [Source:HGNC Symbol;Acc:HGNC:17344]	21	32311018	32393026	-1
ENSG00000165934	0.144117	7.25227	3.4137	0.00257435	0.00441074	-3.99366	53981	CPSF2	cleavage and polyadenylation specific factor 2 [Source:HGNC Symbol;Acc:HGNC:2325]	14	92121937	92172145	1
ENSG00000186416	0.185728	4.60073	3.41191	0.00258523	0.0044286	-3.64562	55922	NKRF	NFKB repressing factor [Source:HGNC Symbol;Acc:HGNC:19374]	X	119588337	119605895	-1
ENSG00000149658	0.130866	6.19612	3.38896	0.00272905	0.00465604	-3.96953	54915	YTHDF1	YTH N6-methyladenosine RNA binding protein 1 [Source:HGNC Symbol;Acc:HGNC:15867]	20	63195429	63216234	-1
ENSG00000158526	0.157654	5.26906	3.3877	0.00273718	0.00466865	-3.83961	90121	TSR2	TSR2, ribosome maturation factor [Source:HGNC Symbol;Acc:HGNC:25455]	X	54440401	54445487	1
ENSG00000134874	-0.11412	6.93076	-3.38577	0.00274967	0.00468658	-4.03604	22873	DZIP1	DAZ interacting zinc finger protein 1 [Source:HGNC Symbol;Acc:HGNC:20908]	13	95578202	95644703	-1
ENSG00000047188	0.148754	5.85094	3.38568	0.00275026	0.00468718	-3.9363	64848	YTHDC2	YTH domain containing 2 [Source:HGNC Symbol;Acc:HGNC:24721]	5	113513683	113595285	1
ENSG00000131368	0.132035	6.05057	3.37203	0.00284018	0.00483088	-3.99233	64432	MRPS25	mitochondrial ribosomal protein S25 [Source:HGNC Symbol;Acc:HGNC:14511]	3	15042460	15065335	-1
ENSG00000124374	-0.479655	2.81056	-3.35575	0.00295117	0.00500531	-3.27706	400961	PAIP2B	poly(A) binding protein interacting protein 2B [Source:HGNC Symbol;Acc:HGNC:29200]	2	71182739	71227083	-1
ENSG00000059145	-0.19721	4.49927	-3.35296	0.00297059	0.00503599	-3.74769	64718	UNKL	unkempt family like zinc finger [Source:HGNC Symbol;Acc:HGNC:14184]	16	1363205	1414751	-1
ENSG00000049883	0.196349	4.39891	3.3529	0.00297102	0.00503627	-3.7337	79810	PTCD2	pentatricopeptide repeat domain 2 [Source:HGNC Symbol;Acc:HGNC:25734]	5	72320367	72368395	1
ENSG00000119392	0.136059	5.7641	3.35122	0.00298279	0.00505442	-4.00339	2733	GLE1	GLE1, RNA export mediator [Source:HGNC Symbol;Acc:HGNC:4315]	9	128504700	128542288	1
ENSG00000129566	-0.158942	4.84273	-3.33599	0.00309156	0.00522334	-3.86651	7011	TEP1	telomerase associated protein 1 [Source:HGNC Symbol;Acc:HGNC:11726]	14	20365667	20413429	-1
ENSG00000075151	0.116254	7.50161	3.33318	0.00311204	0.00525701	-4.19361	8672	EIF4G3	eukaryotic translation initiation factor 4 gamma 3 [Source:HGNC Symbol;Acc:HGNC:3298]	1	20806292	21176888	-1
ENSG00000089876	0.156631	5.81618	3.33002	0.00313527	0.00529295	-4.05953	55760	DHX32	DEAH-box helicase 32 (putative) [Source:HGNC Symbol;Acc:HGNC:16717]	10	125836337	125896436	-1
ENSG00000183808	0.134172	6.63766	3.32494	0.00317292	0.00534843	-4.15668	389677	RBM12B	RNA binding motif protein 12B [Source:HGNC Symbol;Acc:HGNC:32310]	8	93729356	93741017	-1
ENSG00000135097	0.238909	4.09401	3.31461	0.00325081	0.00546807	-3.74585	4440	MSI1	musashi RNA binding protein 1 [Source:HGNC Symbol;Acc:HGNC:7330]	12	120341330	120369180	-1
ENSG00000134398	-0.52888	1.07318	-3.31193	0.0032714	0.00549976	-2.88286	10595	ERN2	endoplasmic reticulum to nucleus signaling 2 [Source:HGNC Symbol;Acc:HGNC:16942]	16	23690309	23713500	-1
ENSG00000108592	0.143934	6.75691	3.30433	0.00333028	0.00558736	-4.21272	117246	FTSJ3	FtsJ homolog 3 [Source:HGNC Symbol;Acc:HGNC:17136]	17	63819433	63830012	-1
ENSG00000040341	0.126686	6.69266	3.28615	0.00347533	0.00580812	-4.24952	27067	STAU2	staufen double-stranded RNA binding protein 2 [Source:HGNC Symbol;Acc:HGNC:11371]	8	73420369	73747708	-1
ENSG00000132773	0.182249	5.11659	3.27914	0.00353292	0.00589658	-4.06015	114034	TOE1	target of EGR1, member 1 (nuclear) [Source:HGNC Symbol;Acc:HGNC:15954]	1	45339670	45343975	1
ENSG00000101782	0.141178	5.96917	3.26264	0.00367204	0.00611803	-4.23304	8780	RIOK3	RIO kinase 3 [Source:HGNC Symbol;Acc:HGNC:11451]	18	23452823	23486603	1
ENSG00000124802	-0.192512	5.29465	-3.24949	0.00378678	0.00629538	-4.15352	9521	EEF1E1	eukaryotic translation elongation factor 1 epsilon 1 [Source:HGNC Symbol;Acc:HGNC:3212]	6	8073360	8102578	-1
ENSG00000137497	-0.10768	8.14519	-3.24907	0.00379052	0.00630104	-4.4207	4926	NUMA1	nuclear mitotic apparatus protein 1 [Source:HGNC Symbol;Acc:HGNC:8059]	11	72002864	72080693	-1
ENSG00000127022	-0.110878	10.0257	-3.23493	0.00391791	0.00649971	-4.53495	821	CANX	calnexin [Source:HGNC Symbol;Acc:HGNC:1473]	5	179678628	179730925	1
ENSG00000143742	-0.168847	8.06157	-3.23355	0.00393054	0.00651724	-4.45104	6726	SRP9	signal recognition particle 9 [Source:HGNC Symbol;Acc:HGNC:11304]	1	225777813	225790466	1
ENSG00000181163	0.124807	8.96194	3.23201	0.00394474	0.00653736	-4.50102	4869	NPM1	nucleophosmin [Source:HGNC Symbol;Acc:HGNC:7910]	5	171387116	171411137	1
ENSG00000274523	0.138379	6.19347	3.22853	0.00397697	0.00658789	-4.33622	81554	RCC1L	RCC1 like [Source:HGNC Symbol;Acc:HGNC:14948]	7	75027122	75074228	-1
ENSG00000083520	0.153814	6.9002	3.21537	0.00410104	0.00678098	-4.42518	22894	DIS3	DIS3 homolog, exosome endoribonuclease and 3'-5' exoribonuclease [Source:HGNC Symbol;Acc:HGNC:20604]	13	72752169	72782096	-1
ENSG00000204348	-0.199507	4.02165	-3.2137	0.00411698	0.00680558	-3.9452	1797	DXO	decapping exoribonuclease [Source:HGNC Symbol;Acc:HGNC:2992]	6	31969810	31972292	-1
ENSG00000163684	0.141399	5.96861	3.20902	0.00416219	0.00687431	-4.35471	11102	RPP14	ribonuclease P/MRP subunit p14 [Source:HGNC Symbol;Acc:HGNC:30327]	3	58306247	58324695	1
ENSG00000060138	-0.160148	5.60616	-3.20519	0.00419955	0.00692758	-4.30784	8531	YBX3	Y-box binding protein 3 [Source:HGNC Symbol;Acc:HGNC:2428]	12	10699089	10723312	-1
ENSG00000086232	-0.128269	6.52276	-3.20496	0.00420185	0.00693076	-4.41823	27102	EIF2AK1	eukaryotic translation initiation factor 2 alpha kinase 1 [Source:HGNC Symbol;Acc:HGNC:24921]	7	6022244	6059230	-1
ENSG00000187051	0.161389	5.60654	3.19957	0.00425494	0.00701041	-4.32602	91582	RPS19BP1	ribosomal protein S19 binding protein 1 [Source:HGNC Symbol;Acc:HGNC:28749]	22	39529093	39532855	-1
ENSG00000134627	-0.447434	1.41387	-3.19235	0.00432712	0.00712211	-3.25124	143689	PIWIL4	piwi like RNA-mediated gene silencing 4 [Source:HGNC Symbol;Acc:HGNC:18444]	11	94543840	94621421	1
ENSG00000143321	-0.105706	7.93224	-3.19234	0.00432724	0.00712211	-4.53759	3068	HDGF	hepatoma-derived growth factor [Source:HGNC Symbol;Acc:HGNC:4856]	1	156742107	156766925	-1
ENSG00000144381	-0.15562	9.03379	-3.19181	0.00433263	0.00713037	-4.59396	3329	HSPD1	heat shock protein family D (Hsp60) member 1 [Source:HGNC Symbol;Acc:HGNC:5261]	2	197486581	197516737	-1
ENSG00000101138	-0.121159	5.9451	-3.18801	0.00437109	0.00718806	-4.39571	1477	CSTF1	cleavage stimulation factor subunit 1 [Source:HGNC Symbol;Acc:HGNC:2483]	20	56392371	56406369	1
ENSG00000160752	-0.105106	8.6203	-3.18009	0.00445244	0.00731296	-4.60163	2224	FDPS	farnesyl diphosphate synthase [Source:HGNC Symbol;Acc:HGNC:3631]	1	155308748	155320666	1
ENSG00000135900	0.197994	5.19877	3.17071	0.00455068	0.00746139	-4.32192	65080	MRPL44	mitochondrial ribosomal protein L44 [Source:HGNC Symbol;Acc:HGNC:16650]	2	223957404	223967714	1
ENSG00000082515	0.170478	4.13599	3.16606	0.00460022	0.00753416	-4.09278	29093	MRPL22	mitochondrial ribosomal protein L22 [Source:HGNC Symbol;Acc:HGNC:14480]	5	154941070	154969411	1
ENSG00000145912	-0.202672	5.49414	-3.15942	0.00467178	0.00764147	-4.39203	55651	NHP2	NHP2 ribonucleoprotein [Source:HGNC Symbol;Acc:HGNC:14377]	5	178149460	178153967	-1
ENSG00000100442	0.151581	6.27954	3.14803	0.00479705	0.00783151	-4.5269	2287	FKBP3	FK506 binding protein 3 [Source:HGNC Symbol;Acc:HGNC:3719]	14	45115600	45135319	-1
ENSG00000138398	0.187495	7.09395	3.14329	0.00485017	0.00791145	-4.60057	9360	PPIG	peptidylprolyl isomerase G [Source:HGNC Symbol;Acc:HGNC:14650]	2	169584340	169641406	1
ENSG00000198700	0.105218	8.22083	3.13962	0.00489163	0.0079729	-4.67328	55705	IPO9	importin 9 [Source:HGNC Symbol;Acc:HGNC:19425]	1	201829141	201884294	1
ENSG00000169871	0.185631	4.05934	3.13539	0.00493996	0.00804476	-4.14223	81844	TRIM56	tripartite motif containing 56 [Source:HGNC Symbol;Acc:HGNC:19028]	7	101085439	101097967	1
ENSG00000261236	-0.232918	5.92522	-3.12847	0.00501982	0.0081643	-4.52494	23246 102465906	BOP1	block of proliferation 1 [Source:HGNC Symbol;Acc:HGNC:15519]	8	144262102	144291370	-1
ENSG00000112306	0.123938	8.3543	3.12737	0.0050327	0.00818315	-4.70791	6206	RPS12	ribosomal protein S12 [Source:HGNC Symbol;Acc:HGNC:10385]	6	132814441	132817564	1
ENSG00000113643	0.129755	7.38745	3.12497	0.00506073	0.00822591	-4.65929	5917	RARS	arginyl-tRNA synthetase [Source:HGNC Symbol;Acc:HGNC:9870]	5	168486445	168519299	1
ENSG00000113761	0.148767	5.13549	3.11907	0.00513038	0.00832914	-4.42522	23567	ZNF346	zinc finger protein 346 [Source:HGNC Symbol;Acc:HGNC:16403]	5	177022696	177081189	1
ENSG00000108107	0.124695	8.40831	3.11651	0.00516091	0.00837511	-4.73506	6158 102465483	RPL28	ribosomal protein L28 [Source:HGNC Symbol;Acc:HGNC:10330]	19	55385345	55403250	1
ENSG00000110060	0.152052	4.59807	3.11086	0.0052289	0.00847456	-4.32926	83480	PUS3	pseudouridylate synthase 3 [Source:HGNC Symbol;Acc:HGNC:25461]	11	125893485	125903221	-1
ENSG00000151247	0.135208	6.04501	3.10814	0.00526201	0.00852388	-4.59094	1977	EIF4E	eukaryotic translation initiation factor 4E [Source:HGNC Symbol;Acc:HGNC:3287]	4	98871684	98930637	-1
ENSG00000172922	-0.129154	5.74888	-3.1027	0.00532871	0.00862308	-4.56066	84153	RNASEH2C	ribonuclease H2 subunit C [Source:HGNC Symbol;Acc:HGNC:24116]	11	65714896	65720947	-1
ENSG00000164346	0.128947	6.63193	3.093	0.00544965	0.00880753	-4.68116	10412	NSA2	NSA2, ribosome biogenesis homolog [Source:HGNC Symbol;Acc:HGNC:30728]	5	74766991	74780113	1
ENSG00000136271	0.141903	6.26735	3.0922	0.00545971	0.00882228	-4.65071	54606	DDX56	DEAD-box helicase 56 [Source:HGNC Symbol;Acc:HGNC:18193]	7	44565417	44575051	-1
ENSG00000162076	-0.207437	3.47455	-3.0735	0.0057008	0.00918761	-4.11294	114984	FLYWCH2	FLYWCH family member 2 [Source:HGNC Symbol;Acc:HGNC:25178]	16	2883186	2899382	1
ENSG00000082898	-0.109895	9.20608	-3.0689	0.00576175	0.00927481	-4.87721	7514	XPO1	exportin 1 [Source:HGNC Symbol;Acc:HGNC:12825]	2	61477849	61538626	-1
ENSG00000171262	0.214003	3.81042	3.06233	0.00584968	0.00940358	-4.24065	283742	FAM98B	family with sequence similarity 98 member B [Source:HGNC Symbol;Acc:HGNC:26773]	15	38454127	38487710	1
ENSG00000068394	-0.175541	4.29141	-3.06134	0.00586314	0.00942283	-4.35707	27238	GPKOW	G-patch domain and KOW motifs [Source:HGNC Symbol;Acc:HGNC:30677]	X	49113389	49123801	-1
ENSG00000141759	0.12985	5.90388	3.04807	0.00604529	0.0096885	-4.70741	10907	TXNL4A	thioredoxin like 4A [Source:HGNC Symbol;Acc:HGNC:30551]	18	79970811	80033949	-1
ENSG00000117614	0.132918	4.84126	3.0423	0.00612619	0.00980407	-4.53615	25949	SYF2	SYF2 pre-mRNA splicing factor [Source:HGNC Symbol;Acc:HGNC:19824]	1	25222679	25232502	-1
ENSG00000004534	0.107968	7.09858	3.03125	0.006284	0.0100405	-4.85049	10180	RBM6	RNA binding motif protein 6 [Source:HGNC Symbol;Acc:HGNC:9903]	3	49940007	50100045	1
ENSG00000136810	-0.152243	5.79413	-3.02368	0.00639445	0.0102101	-4.74241	7295	TXN	thioredoxin [Source:HGNC Symbol;Acc:HGNC:12435]	9	110243811	110256640	-1
ENSG00000131503	0.104166	7.13802	3.02329	0.00640014	0.0102184	-4.87057	54882	ANKHD1	ankyrin repeat and KH domain containing 1 [Source:HGNC Symbol;Acc:HGNC:24714]	5	140401814	140539856	1
ENSG00000265681	0.139738	5.383	3.0224	0.00641323	0.0102358	-4.68564	6139	RPL17	ribosomal protein L17 [Source:HGNC Symbol;Acc:HGNC:10307]	18	49488453	49492523	-1
ENSG00000164896	0.163908	5.02717	3.01576	0.00651185	0.0103827	-4.63402	10922	FASTK	Fas activated serine/threonine kinase [Source:HGNC Symbol;Acc:HGNC:24676]	7	151076593	151080866	-1
ENSG00000177613	0.112111	6.46118	2.99747	0.00679128	0.0107992	-4.87911	23283	CSTF2T	cleavage stimulation factor subunit 2, tau variant [Source:HGNC Symbol;Acc:HGNC:17086]	10	51695487	51699591	-1
ENSG00000148690	0.178529	4.2159	2.98998	0.00690891	0.0109697	-4.5055	118924	FRA10AC1	fragile site, folic acid type, rare, fra(10)(q23.3) or fra(10)(q24.2) candidate 1 [Source:HGNC Symbol;Acc:HGNC:1162]	10	93667883	93702572	-1
ENSG00000162775	-0.130147	6.66176	-2.98164	0.00704223	0.0111646	-4.92827	64783	RBM15	RNA binding motif protein 15 [Source:HGNC Symbol;Acc:HGNC:14959]	1	110338506	110346681	1
ENSG00000089195	0.177877	5.139	2.98087	0.00705468	0.0111815	-4.73326	51605	TRMT6	tRNA methyltransferase 6 [Source:HGNC Symbol;Acc:HGNC:20900]	20	5937235	5950558	-1
ENSG00000138029	0.129592	5.81588	2.97682	0.00712047	0.0112774	-4.85335	3032	HADHB	hydroxyacyl-CoA dehydrogenase/3-ketoacyl-CoA thiolase/enoyl-CoA hydratase (trifunctional protein), beta subunit [Source:HGNC Symbol;Acc:HGNC:4803]	2	26243170	26290468	1
ENSG00000111880	0.106883	6.13024	2.9766	0.0071241	0.0112821	-4.89226	8732	RNGTT	RNA guanylyltransferase and 5'-phosphatase [Source:HGNC Symbol;Acc:HGNC:10073]	6	88610272	88963721	-1
ENSG00000086189	0.153956	6.01424	2.96571	0.00730389	0.0115447	-4.90337	27292	DIMT1	DIM1 dimethyladenosine transferase 1 homolog [Source:HGNC Symbol;Acc:HGNC:30217]	5	62387254	62403939	-1
ENSG00000125835	0.108726	8.30106	2.95079	0.00755744	0.0119246	-5.09678	6628	SNRPB	small nuclear ribonucleoprotein polypeptides B and B1 [Source:HGNC Symbol;Acc:HGNC:11153]	20	2461634	2470853	-1
ENSG00000177733	0.107931	8.50138	2.94688	0.00762523	0.0120236	-5.11568	10949	HNRNPA0	heterogeneous nuclear ribonucleoprotein A0 [Source:HGNC Symbol;Acc:HGNC:5030]	5	137745651	137754376	-1
ENSG00000178982	0.107651	6.44847	2.94291	0.00769458	0.0121219	-4.99785	27335	EIF3K	eukaryotic translation initiation factor 3 subunit K [Source:HGNC Symbol;Acc:HGNC:24656]	19	38619082	38636955	1
ENSG00000157036	0.150573	4.58898	2.94091	0.00772987	0.0121724	-4.70339	9941	EXOG	endo/exonuclease (5'-3'), endonuclease G-like [Source:HGNC Symbol;Acc:HGNC:3347]	3	38496127	38542161	1
ENSG00000141101	0.133132	4.9213	2.93972	0.00775083	0.0122004	-4.77908	28987	NOB1	NIN1/PSMD8 binding protein 1 homolog [Source:HGNC Symbol;Acc:HGNC:29540]	16	69741867	69754940	-1
ENSG00000100353	0.102375	7.73192	2.93373	0.00785757	0.0123585	-5.10281	8664	EIF3D	eukaryotic translation initiation factor 3 subunit D [Source:HGNC Symbol;Acc:HGNC:3278]	22	36510850	36529436	-1
ENSG00000180098	0.154985	4.33734	2.92721	0.0079752	0.0125307	-4.67298	54952	TRNAU1AP	tRNA selenocysteine 1 associated protein 1 [Source:HGNC Symbol;Acc:HGNC:30813]	1	28553085	28578545	1
ENSG00000196363	0.143492	6.2307	2.92539	0.00800843	0.0125753	-5.01556	11091	WDR5	WD repeat domain 5 [Source:HGNC Symbol;Acc:HGNC:12757]	9	134135365	134159968	1
ENSG00000170889	0.104566	8.13286	2.91712	0.00816081	0.0127958	-5.16138	6203	RPS9	ribosomal protein S9 [Source:HGNC Symbol;Acc:HGNC:10442]	19	54200742	54249003	1
ENSG00000014164	0.194797	3.43654	2.91173	0.00826161	0.01294	-4.47051	23144	ZC3H3	zinc finger CCCH-type containing 3 [Source:HGNC Symbol;Acc:HGNC:28972]	8	143437655	143541453	-1
ENSG00000198265	0.124991	6.30629	2.88468	0.00878559	0.0137019	-5.1117	9931	HELZ	helicase with zinc finger [Source:HGNC Symbol;Acc:HGNC:16878]	17	67070438	67245989	-1
ENSG00000177971	0.159448	5.93099	2.87574	0.00896568	0.0139621	-5.08947	55272	IMP3	IMP3, U3 small nucleolar ribonucleoprotein [Source:HGNC Symbol;Acc:HGNC:14497]	15	75639085	75648706	-1
ENSG00000114391	0.118427	7.30661	2.87552	0.00897009	0.0139678	-5.20481	6152	RPL24	ribosomal protein L24 [Source:HGNC Symbol;Acc:HGNC:10325]	3	101681091	101686782	-1
ENSG00000152332	0.104047	6.81797	2.87478	0.00898523	0.0139891	-5.17507	127933	UHMK1	U2AF homology motif (UHM) kinase 1 [Source:HGNC Symbol;Acc:HGNC:19683]	1	162497251	162529629	1
ENSG00000113742	-0.156931	4.53416	-2.87341	0.00901319	0.014028	-4.82969	80315	CPEB4	cytoplasmic polyadenylation element binding protein 4 [Source:HGNC Symbol;Acc:HGNC:21747]	5	173888280	173961976	1
ENSG00000106305	-0.168366	5.61844	-2.85666	0.00936182	0.0145338	-5.08148	7965	AIMP2	aminoacyl tRNA synthetase complex interacting multifunctional protein 2 [Source:HGNC Symbol;Acc:HGNC:20609]	7	6009245	6023834	1
ENSG00000108826	0.138392	5.4403	2.85384	0.00942187	0.0146209	-5.06419	51264	MRPL27	mitochondrial ribosomal protein L27 [Source:HGNC Symbol;Acc:HGNC:14483]	17	50367857	50373214	-1
ENSG00000043514	-0.112816	5.0771	-2.84697	0.0095694	0.0148353	-5.00728	54802	TRIT1	tRNA isopentenyltransferase 1 [Source:HGNC Symbol;Acc:HGNC:20286]	1	39841022	39883511	-1
ENSG00000116221	0.11423	6.28416	2.84332	0.00964869	0.0149448	-5.19888	51253	MRPL37	mitochondrial ribosomal protein L37 [Source:HGNC Symbol;Acc:HGNC:14034]	1	54184041	54225464	1
ENSG00000101888	0.236268	3.99629	2.83658	0.00979696	0.0151596	-4.78453	55916	NXT2	nuclear transport factor 2 like export factor 2 [Source:HGNC Symbol;Acc:HGNC:18151]	X	109535781	109544690	1
ENSG00000135972	-0.125051	5.50988	-2.83061	0.00992994	0.0153441	-5.12122	64965	MRPS9	mitochondrial ribosomal protein S9 [Source:HGNC Symbol;Acc:HGNC:14501]	2	105037983	105099960	1
ENSG00000092847	0.106207	6.78991	2.82441	0.0100699	0.0155413	-5.28185	26523	AGO1	argonaute 1, RISC catalytic component [Source:HGNC Symbol;Acc:HGNC:3262]	1	35869808	35930528	1
ENSG00000140829	0.100981	6.62422	2.82318	0.0100978	0.0155781	-5.27223	9785	DHX38	DEAH-box helicase 38 [Source:HGNC Symbol;Acc:HGNC:17211]	16	72093562	72112912	1
ENSG00000160633	0.109585	6.67864	2.82039	0.0101616	0.0156739	-5.28249	6294	SAFB	scaffold attachment factor B [Source:HGNC Symbol;Acc:HGNC:10520]	19	5623035	5668478	1
ENSG00000114784	0.158068	4.44747	2.81018	0.0103981	0.0160102	-4.95329	10289	EIF1B	eukaryotic translation initiation factor 1B [Source:HGNC Symbol;Acc:HGNC:30792]	3	40309684	40312424	1
ENSG00000053372	0.183994	5.98592	2.80557	0.0105067	0.0161682	-5.24782	51154	MRTO4	MRT4 homolog, ribosome maturation factor [Source:HGNC Symbol;Acc:HGNC:18477]	1	19251539	19260128	1
ENSG00000104872	-0.107491	5.55778	-2.80187	0.0105947	0.0162904	-5.19116	55011	PIH1D1	PIH1 domain containing 1 [Source:HGNC Symbol;Acc:HGNC:26075]	19	49446298	49453497	-1
ENSG00000143303	0.186118	3.76079	2.79763	0.0106962	0.0164357	-4.80478	51093	RRNAD1	ribosomal RNA adenine dimethylase domain containing 1 [Source:HGNC Symbol;Acc:HGNC:24273]	1	156728442	156736960	1
ENSG00000089048	0.189594	5.37877	2.79241	0.0108226	0.0166139	-5.18649	51575	ESF1	ESF1 nucleolar pre-rRNA processing protein homolog [Source:HGNC Symbol;Acc:HGNC:15898]	20	13714322	13784886	-1
ENSG00000116120	0.113327	6.30699	2.77485	0.011258	0.017246	-5.34806	10056	FARSB	phenylalanyl-tRNA synthetase beta subunit [Source:HGNC Symbol;Acc:HGNC:17800]	2	222570536	222656337	-1
ENSG00000143436	0.133317	5.66294	2.77442	0.0112689	0.0172543	-5.2702	65005	MRPL9	mitochondrial ribosomal protein L9 [Source:HGNC Symbol;Acc:HGNC:14277]	1	151759643	151763564	-1
ENSG00000037241	0.188487	3.43358	2.76586	0.0114874	0.0175676	-4.78378	51121	RPL26L1	ribosomal protein L26 like 1 [Source:HGNC Symbol;Acc:HGNC:17050]	5	172958729	172969771	1
ENSG00000071894	-0.147331	5.9953	-2.76497	0.0115104	0.0175985	-5.33135	29894 100126351 100302196 102466749	CPSF1	cleavage and polyadenylation specific factor 1 [Source:HGNC Symbol;Acc:HGNC:2324]	8	144393229	144409349	-1
ENSG00000197157	-0.0820291	8.34347	-2.76005	0.011638	0.0177865	-5.51021	27044	SND1	staphylococcal nuclease and tudor domain containing 1 [Source:HGNC Symbol;Acc:HGNC:30646]	7	127652180	128092609	1
ENSG00000149016	0.16436	4.27377	2.75848	0.0116791	0.0178464	-5.02115	64852	TUT1	terminal uridylyl transferase 1, U6 snRNA-specific [Source:HGNC Symbol;Acc:HGNC:26184]	11	62575045	62592177	-1
ENSG00000136937	0.109503	6.97648	2.75099	0.0118767	0.018121	-5.45146	4686	NCBP1	nuclear cap binding protein subunit 1 [Source:HGNC Symbol;Acc:HGNC:7658]	9	97633626	97673748	1
ENSG00000168002	0.114456	5.81921	2.74852	0.0119424	0.0182135	-5.34744	5436	POLR2G	RNA polymerase II subunit G [Source:HGNC Symbol;Acc:HGNC:9194]	11	62761544	62766710	1
ENSG00000114867	0.126968	9.01503	2.74524	0.0120305	0.0183406	-5.57484	1981	EIF4G1	eukaryotic translation initiation factor 4 gamma 1 [Source:HGNC Symbol;Acc:HGNC:3296]	3	184314495	184335358	1
ENSG00000135486	0.105038	7.93564	2.74467	0.0120458	0.0183624	-5.52175	3178	HNRNPA1	heterogeneous nuclear ribonucleoprotein A1 [Source:HGNC Symbol;Acc:HGNC:5031]	12	54280193	54287088	1
ENSG00000172409	0.145219	4.40879	2.74296	0.0120919	0.0184267	-5.08703	10978	CLP1	cleavage and polyadenylation factor I subunit 1 [Source:HGNC Symbol;Acc:HGNC:16999]	11	57648992	57661868	1
ENSG00000198755	0.0950872	8.59506	2.7404	0.0121615	0.0185268	-5.56566	4736	RPL10A	ribosomal protein L10a [Source:HGNC Symbol;Acc:HGNC:10299]	6	35468408	35470785	1
ENSG00000126814	0.119975	5.27272	2.73689	0.0122572	0.0186637	-5.28484	57570	TRMT5	tRNA methyltransferase 5 [Source:HGNC Symbol;Acc:HGNC:23141]	14	60971451	60981358	-1
ENSG00000100650	-0.0952385	7.67567	-2.73659	0.0122653	0.018673	-5.52313	6430	SRSF5	serine and arginine rich splicing factor 5 [Source:HGNC Symbol;Acc:HGNC:10787]	14	69726900	69772005	1
ENSG00000140319	-0.132053	6.56308	-2.73526	0.012302	0.0187258	-5.45289	6727	SRP14	signal recognition particle 14 [Source:HGNC Symbol;Acc:HGNC:11299]	15	40035739	40039188	-1
ENSG00000129245	-0.102495	6.35029	-2.72804	0.0125019	0.0190058	-5.4494	9513	FXR2	FMR1 autosomal homolog 2 [Source:HGNC Symbol;Acc:HGNC:4024]	17	7591230	7614871	-1
ENSG00000196449	0.173715	4.34084	2.72737	0.0125207	0.0190328	-5.10402	79693	YRDC	yrdC N6-threonylcarbamoyltransferase domain containing [Source:HGNC Symbol;Acc:HGNC:28905]	1	37802944	37808185	-1
ENSG00000257103	0.089912	7.3208	2.72635	0.0125492	0.0190746	-5.52507	26065	LSM14A	LSM14A, mRNA processing body assembly factor [Source:HGNC Symbol;Acc:HGNC:24489]	19	34172504	34229515	1
ENSG00000162851	0.208333	3.77094	2.70969	0.013024	0.0197551	-4.99473	64216	TFB2M	transcription factor B2, mitochondrial [Source:HGNC Symbol;Acc:HGNC:18559]	1	246540560	246566324	-1
ENSG00000088247	-0.111292	7.11135	-2.7001	0.0133053	0.0201544	-5.56635	8570 100500888	KHSRP	KH-type splicing regulatory protein [Source:HGNC Symbol;Acc:HGNC:6316]	19	6413348	6424794	-1
ENSG00000083312	0.110156	8.7557	2.67925	0.0139363	0.0210414	-5.70242	3842	TNPO1	transportin 1 [Source:HGNC Symbol;Acc:HGNC:6401]	5	72816312	72916733	1
ENSG00000182872	-0.112941	6.6734	-2.66586	0.0143565	0.02165	-5.60801	8241	RBM10	RNA binding motif protein 10 [Source:HGNC Symbol;Acc:HGNC:9896]	X	47144869	47186813	1
ENSG00000155438	-0.116462	6.05306	-2.66341	0.0144346	0.0217622	-5.55324	84365	NIFK	nucleolar protein interacting with the FHA domain of MKI67 [Source:HGNC Symbol;Acc:HGNC:17838]	2	121726945	121736923	-1
ENSG00000173812	-0.113035	6.13285	-2.65827	0.0145997	0.021994	-5.57324	10209	EIF1	eukaryotic translation initiation factor 1 [Source:HGNC Symbol;Acc:HGNC:3249]	17	41688885	41692668	1
ENSG00000075914	0.139273	5.28136	2.65733	0.0146303	0.0220366	-5.45406	23016	EXOSC7	exosome component 7 [Source:HGNC Symbol;Acc:HGNC:28112]	3	44975241	45036066	1
ENSG00000103994	-0.0911787	8.11781	-2.64414	0.0150634	0.0226405	-5.74219	64397	ZNF106	zinc finger protein 106 [Source:HGNC Symbol;Acc:HGNC:12886]	15	42412823	42491123	-1
ENSG00000138231	0.124729	5.0264	2.63932	0.0152246	0.0228609	-5.44249	51163	DBR1	debranching RNA lariats 1 [Source:HGNC Symbol;Acc:HGNC:15594]	3	138161012	138174949	-1
ENSG00000148840	0.162011	5.70891	2.63558	0.0153509	0.023027	-5.56981	23082	PPRC1	peroxisome proliferator-activated receptor gamma, coactivator-related 1 [Source:HGNC Symbol;Acc:HGNC:30025]	10	102132994	102150331	1
ENSG00000076043	-0.160982	4.65285	-2.63343	0.0154239	0.0231273	-5.36716	25996	REXO2	RNA exonuclease 2 [Source:HGNC Symbol;Acc:HGNC:17851]	11	114439386	114450279	1
ENSG00000168517	0.197242	3.30763	2.63178	0.0154801	0.0232043	-5.03124	124790	HEXIM2	hexamethylene bisacetamide inducible 2 [Source:HGNC Symbol;Acc:HGNC:28591]	17	45160700	45170040	1
ENSG00000178691	0.107226	6.55648	2.63115	0.0155017	0.023233	-5.67309	23512	SUZ12	SUZ12 polycomb repressive complex 2 subunit [Source:HGNC Symbol;Acc:HGNC:17101]	17	31937018	32001045	1
ENSG00000135372	0.117067	6.10305	2.62441	0.015734	0.0235532	-5.64321	55226	NAT10	N-acetyltransferase 10 [Source:HGNC Symbol;Acc:HGNC:29830]	11	34105602	34147670	1
ENSG00000141994	0.16149	4.79022	2.62357	0.015763	0.0235892	-5.42627	56931	DUS3L	dihydrouridine synthase 3 like [Source:HGNC Symbol;Acc:HGNC:26920]	19	5784832	5791238	-1
ENSG00000183520	0.140779	5.66371	2.62227	0.0158084	0.0236515	-5.59059	51118	UTP11	UTP11, small subunit processome component homolog (S. cerevisiae) [Source:HGNC Symbol;Acc:HGNC:24329]	1	38009258	38024824	1
ENSG00000084092	-0.128583	4.99694	-2.61863	0.0159355	0.0238304	-5.47388	84273	NOA1	nitric oxide associated 1 [Source:HGNC Symbol;Acc:HGNC:28473]	4	56963370	56978823	-1
ENSG00000111911	0.142037	4.71344	2.61322	0.0161267	0.0241012	-5.43027	135114	HINT3	histidine triad nucleotide binding protein 3 [Source:HGNC Symbol;Acc:HGNC:18468]	6	125956781	125980244	1
ENSG00000165629	0.103923	6.80535	2.60871	0.0162872	0.0243277	-5.73827	509	ATP5C1	ATP synthase, H+ transporting, mitochondrial F1 complex, gamma polypeptide 1 [Source:HGNC Symbol;Acc:HGNC:833]	10	7788129	7807815	1
ENSG00000170365	0.185166	3.54474	2.60608	0.0163819	0.0244594	-5.14936	4086	SMAD1	SMAD family member 1 [Source:HGNC Symbol;Acc:HGNC:6767]	4	145481194	145558079	1
ENSG00000171858	-0.115635	5.98645	-2.60576	0.0163935	0.024469	-5.66502	6227	RPS21	ribosomal protein S21 [Source:HGNC Symbol;Acc:HGNC:10409]	20	62387116	62388520	1
ENSG00000104613	-0.107178	5.69875	-2.60181	0.0165363	0.0246609	-5.63411	55174	INTS10	integrator complex subunit 10 [Source:HGNC Symbol;Acc:HGNC:25548]	8	19817140	19852083	1
ENSG00000274585	-0.423064	1.78687	-2.60104	0.0165644	0.0247008	-4.63791	6066	RNU2-1	RNA, U2 small nuclear 1 [Source:HGNC Symbol;Acc:HGNC:10142]	17	43233787	43233977	-1
ENSG00000103550	0.118538	6.94594	2.59568	0.0167608	0.0249663	-5.77483	400506	KNOP1	lysine rich nucleolar protein 1 [Source:HGNC Symbol;Acc:HGNC:34404]	16	19701934	19718235	-1
ENSG00000164902	0.0986604	6.06141	2.58338	0.0172194	0.025591	-5.7231	51808	PHAX	phosphorylated adaptor for RNA export [Source:HGNC Symbol;Acc:HGNC:10241]	5	126600268	126627252	1
ENSG00000100226	0.0959458	6.11237	2.57954	0.0173649	0.0257911	-5.73675	9567	GTPBP1	GTP binding protein 1 [Source:HGNC Symbol;Acc:HGNC:4669]	22	38705723	38738299	1
ENSG00000163877	0.143673	4.77061	2.57315	0.0176097	0.0261301	-5.52568	79753	SNIP1	Smad nuclear interacting protein 1 [Source:HGNC Symbol;Acc:HGNC:30587]	1	37534449	37554302	-1
ENSG00000119705	0.127642	5.90514	2.57223	0.0176453	0.0261769	-5.7272	81892	SLIRP	SRA stem-loop interacting RNA binding protein [Source:HGNC Symbol;Acc:HGNC:20495]	14	77708071	77761104	1
ENSG00000187959	0.278078	2.26769	2.57148	0.0176741	0.026212	-4.86231	642843	CPSF4L	cleavage and polyadenylation specific factor 4 like [Source:HGNC Symbol;Acc:HGNC:33632]	17	73248449	73262352	-1
ENSG00000162231	0.111914	5.39002	2.56912	0.0177656	0.0263368	-5.65551	10482	NXF1	nuclear RNA export factor 1 [Source:HGNC Symbol;Acc:HGNC:8071]	11	62792123	62806302	-1
ENSG00000137818	0.198709	7.77418	2.56845	0.0177917	0.0263673	-5.88113	6176	RPLP1	ribosomal protein lateral stalk subunit P1 [Source:HGNC Symbol;Acc:HGNC:10372]	15	69452784	69456194	1
ENSG00000005302	0.117775	4.8033	2.56566	0.0179005	0.0265162	-5.5479	10943	MSL3	male-specific lethal 3 homolog (Drosophila) [Source:HGNC Symbol;Acc:HGNC:7370]	X	11758159	11775753	1
ENSG00000128311	-0.143489	4.22828	-2.55886	0.0181686	0.0268902	-5.41843	7263	TST	thiosulfate sulfurtransferase [Source:HGNC Symbol;Acc:HGNC:12388]	22	37010859	37020183	-1
ENSG00000149262	0.110356	5.09803	2.55713	0.0182378	0.026982	-5.6262	92105	INTS4	integrator complex subunit 4 [Source:HGNC Symbol;Acc:HGNC:25048]	11	77878720	77994678	-1
ENSG00000214753	0.0988113	6.58374	2.52208	0.0196854	0.0289454	-5.8994	221092	HNRNPUL2	heterogeneous nuclear ribonucleoprotein U like 2 [Source:HGNC Symbol;Acc:HGNC:25451]	11	62712630	62727349	-1
ENSG00000183751	-0.170178	4.69689	-2.51904	0.0198162	0.0291175	-5.612	10607	TBL3	transducin beta like 3 [Source:HGNC Symbol;Acc:HGNC:11587]	16	1972037	1982933	1
ENSG00000266472	-0.106108	5.91379	-2.49989	0.0206572	0.0302735	-5.87264	54460	MRPS21	mitochondrial ribosomal protein S21 [Source:HGNC Symbol;Acc:HGNC:14046]	1	150293720	150308979	1
ENSG00000137710	0.100953	7.42138	2.49025	0.0210931	0.0308598	-6.01947	5962	RDX	radixin [Source:HGNC Symbol;Acc:HGNC:9944]	11	110174880	110296722	-1
ENSG00000188739	0.110164	5.19461	2.48333	0.021411	0.0312912	-5.79469	23029	RBM34	RNA binding motif protein 34 [Source:HGNC Symbol;Acc:HGNC:28965]	1	235131183	235161457	-1
ENSG00000239789	0.121705	4.51214	2.46859	0.0221036	0.032236	-5.67837	51373	MRPS17	mitochondrial ribosomal protein S17 [Source:HGNC Symbol;Acc:HGNC:14047]	7	55951819	55956501	1
ENSG00000046647	-0.208277	2.78406	-2.46465	0.0222926	0.0324995	-5.21333	54960	GEMIN8	gem nuclear organelle associated protein 8 [Source:HGNC Symbol;Acc:HGNC:26044]	X	14008279	14029893	-1
ENSG00000219200	0.103878	5.09425	2.45809	0.0226098	0.0329366	-5.82593	440400	RNASEK	ribonuclease K [Source:HGNC Symbol;Acc:HGNC:33911]	17	7012417	7014532	1
ENSG00000106028	0.127706	6.42723	2.44589	0.0232112	0.0337144	-6.0399	6742	SSBP1	single stranded DNA binding protein 1 [Source:HGNC Symbol;Acc:HGNC:11317]	7	141738321	141787922	1
ENSG00000163634	0.127472	5.20489	2.44251	0.0233809	0.0339329	-5.87876	80145	THOC7	THO complex 7 [Source:HGNC Symbol;Acc:HGNC:29874]	3	63833870	63863903	-1
ENSG00000178607	-0.229483	2.80765	-2.44095	0.0234591	0.0340302	-5.26646	2081	ERN1	endoplasmic reticulum to nucleus signaling 1 [Source:HGNC Symbol;Acc:HGNC:3449]	17	64039142	64130819	-1
ENSG00000102309	0.202157	3.04698	2.43894	0.0235609	0.03417	-5.35115	5303	PIN4	peptidylprolyl cis/trans isomerase, NIMA-interacting 4 [Source:HGNC Symbol;Acc:HGNC:8992]	X	72181353	72302926	1
ENSG00000218891	-0.247779	2.32711	-2.42793	0.0241243	0.0349044	-5.15329	163033	ZNF579	zinc finger protein 579 [Source:HGNC Symbol;Acc:HGNC:26646]	19	55576770	55580845	-1
ENSG00000242485	0.09839	5.71833	2.42032	0.0245211	0.0354461	-6.00832	55052	MRPL20	mitochondrial ribosomal protein L20 [Source:HGNC Symbol;Acc:HGNC:14478]	1	1401908	1407313	-1
ENSG00000166197	0.132606	7.24126	2.41983	0.0245467	0.0354804	-6.14988	9221	NOLC1	nucleolar and coiled-body phosphoprotein 1 [Source:HGNC Symbol;Acc:HGNC:15608]	10	102152176	102163871	1
ENSG00000145414	0.219277	2.97973	2.41442	0.0248325	0.0358689	-5.38134	92345	NAF1	nuclear assembly factor 1 ribonucleoprotein [Source:HGNC Symbol;Acc:HGNC:25126]	4	163110073	163166921	-1
ENSG00000183617	0.157612	3.70573	2.40429	0.0253762	0.0366208	-5.60072	116541	MRPL54	mitochondrial ribosomal protein L54 [Source:HGNC Symbol;Acc:HGNC:16685]	19	3762664	3768575	1
ENSG00000135314	0.20151	3.09907	2.40255	0.0254705	0.036743	-5.43814	80759	KHDC1	KH homology domain containing 1 [Source:HGNC Symbol;Acc:HGNC:21366]	6	73241314	73310365	-1
ENSG00000204574	0.0967796	7.19056	2.40066	0.0255737	0.0368717	-6.18457	23	ABCF1	ATP binding cassette subfamily F member 1 [Source:HGNC Symbol;Acc:HGNC:70]	6	30571376	30597179	1
ENSG00000197728	0.177282	3.27633	2.39845	0.0256949	0.0370273	-5.49522	6231 101929876	RPS26	ribosomal protein S26 [Source:HGNC Symbol;Acc:HGNC:10414]	12	56041853	56044675	1
ENSG00000130764	-0.108387	5.8753	-2.39732	0.0257568	0.0371024	-6.07253	57470	LRRC47	leucine rich repeat containing 47 [Source:HGNC Symbol;Acc:HGNC:29207]	1	3778558	3796504	-1
ENSG00000105127	-0.10908	5.68504	-2.39234	0.0260319	0.0374702	-6.05535	10270	AKAP8	A-kinase anchoring protein 8 [Source:HGNC Symbol;Acc:HGNC:378]	19	15353385	15379798	-1
ENSG00000126945	0.0987881	7.05586	2.39219	0.0260402	0.0374793	-6.19287	3188	HNRNPH2	heterogeneous nuclear ribonucleoprotein H2 (H') [Source:HGNC Symbol;Acc:HGNC:5042]	X	101408295	101414133	1
ENSG00000149806	0.0794908	7.14211	2.38008	0.0267207	0.0383831	-6.22204	2197	FAU	FAU, ubiquitin like and ribosomal protein S30 fusion [Source:HGNC Symbol;Acc:HGNC:3597]	11	65120628	65122473	-1
ENSG00000173113	0.0855367	6.11048	2.36679	0.0274865	0.0394174	-6.16414	51504	TRMT112	tRNA methyltransferase 11-2 homolog (S. cerevisiae) [Source:HGNC Symbol;Acc:HGNC:26940]	11	64316460	64318084	-1
ENSG00000055950	0.100566	5.29174	2.36355	0.0276765	0.039669	-6.05064	84545	MRPL43	mitochondrial ribosomal protein L43 [Source:HGNC Symbol;Acc:HGNC:14517]	10	100969458	100987515	-1
ENSG00000167136	0.152576	4.13481	2.36231	0.0277493	0.0397672	-5.79657	2021	ENDOG	endonuclease G [Source:HGNC Symbol;Acc:HGNC:3346]	9	128818474	128822677	1
ENSG00000205323	-0.112981	6.17534	-2.35915	0.0279361	0.0400169	-6.18384	84324	SARNP	SAP domain containing ribonucleoprotein [Source:HGNC Symbol;Acc:HGNC:24432]	12	55752463	55817756	-1
ENSG00000184575	0.100009	7.17823	2.35888	0.027952	0.0400366	-6.26603	11260	XPOT	exportin for tRNA [Source:HGNC Symbol;Acc:HGNC:12826]	12	64404350	64451127	1
ENSG00000151461	0.123216	6.07887	2.35871	0.0279623	0.0400483	-6.17679	26019	UPF2	UPF2 regulator of nonsense transcripts homolog (yeast) [Source:HGNC Symbol;Acc:HGNC:17854]	10	11920022	12043170	-1
ENSG00000055044	0.12282	7.08287	2.35533	0.0281633	0.040318	-6.26714	51602	NOP58	NOP58 ribonucleoprotein [Source:HGNC Symbol;Acc:HGNC:29926]	2	202265716	202303666	1
ENSG00000128951	0.122441	5.62772	2.3487	0.0285619	0.0408546	-6.13616	1854	DUT	deoxyuridine triphosphatase [Source:HGNC Symbol;Acc:HGNC:3078]	15	48331011	48343373	1
ENSG00000144029	0.0940505	5.77998	2.33837	0.0291925	0.0417001	-6.17825	64969	MRPS5	mitochondrial ribosomal protein S5 [Source:HGNC Symbol;Acc:HGNC:14498]	2	95087207	95149434	-1
ENSG00000166173	0.158846	3.96348	2.33793	0.0292199	0.0417267	-5.79976	55323	LARP6	La ribonucleoprotein domain family member 6 [Source:HGNC Symbol;Acc:HGNC:24012]	15	70829130	70854159	-1
ENSG00000060688	0.0943044	6.98222	2.33523	0.0293871	0.0419528	-6.29971	9410	SNRNP40	small nuclear ribonucleoprotein U5 subunit 40 [Source:HGNC Symbol;Acc:HGNC:30857]	1	31259568	31296782	-1
ENSG00000162623	0.12564	5.78657	2.32517	0.0300176	0.0427918	-6.20525	127253	TYW3	tRNA-yW synthesizing protein 3 homolog [Source:HGNC Symbol;Acc:HGNC:24757]	1	74733152	74766678	1
ENSG00000105447	0.16072	5.94101	2.31859	0.030437	0.0433473	-6.23873	83743	GRWD1	glutamate rich WD repeat containing 1 [Source:HGNC Symbol;Acc:HGNC:21270]	19	48445773	48457022	1
ENSG00000168255	0.241519	2.64119	2.31805	0.0304718	0.0433936	-5.47452	548644	POLR2J3	RNA polymerase II subunit J3 [Source:HGNC Symbol;Acc:HGNC:33853]	7	102537918	102572656	-1
ENSG00000172336	0.136224	5.13383	2.3161	0.0305972	0.0435592	-6.11408	10248	POP7	POP7 homolog, ribonuclease P/MRP subunit [Source:HGNC Symbol;Acc:HGNC:19949]	7	100706053	100707495	1
ENSG00000149657	0.0944725	6.06179	2.30702	0.0311874	0.0443427	-6.27503	149986	LSM14B	LSM family member 14B [Source:HGNC Symbol;Acc:HGNC:15887]	20	62122461	62135378	1
ENSG00000127804	0.0948816	6.03311	2.30473	0.0313378	0.0445433	-6.27618	79066	METTL16	methyltransferase like 16 [Source:HGNC Symbol;Acc:HGNC:28484]	17	2405562	2511891	-1
ENSG00000130255	0.110551	8.32243	2.30175	0.031535	0.0448	-6.4422	25873	RPL36	ribosomal protein L36 [Source:HGNC Symbol;Acc:HGNC:13631]	19	5674947	5691876	1
ENSG00000172795	0.102546	8.11828	2.29133	0.032232	0.0457047	-6.45131	167227	DCP2	decapping mRNA 2 [Source:HGNC Symbol;Acc:HGNC:24452]	5	112976702	113020970	1
ENSG00000150990	0.147962	5.37654	2.26618	0.033974	0.047992	-6.25482	57647	DHX37	DEAH-box helicase 37 [Source:HGNC Symbol;Acc:HGNC:17210]	12	124946825	124989122	-1
ENSG00000184708	0.0984231	5.67289	2.26301	0.0341997	0.048282	-6.30828	56478	EIF4ENIF1	eukaryotic translation initiation factor 4E nuclear import factor 1 [Source:HGNC Symbol;Acc:HGNC:16687]	22	31436977	31496108	-1
ENSG00000173575	0.0787412	7.53297	2.25398	0.03485	0.0491343	-6.48976	1106 100422995	CHD2	chromodomain helicase DNA binding protein 2 [Source:HGNC Symbol;Acc:HGNC:1917]	15	92900189	93028005	1
ENSG00000051596	-0.185156	2.94576	-2.2533	0.0348991	0.0492	-5.67331	84321	THOC3	THO complex 3 [Source:HGNC Symbol;Acc:HGNC:19072]	5	175917873	176034680	-1
ENSG00000187955	-0.515457	0.441506	-2.25144	0.0350344	0.0493833	-4.95563	7373	COL14A1	collagen type XIV alpha 1 chain [Source:HGNC Symbol;Acc:HGNC:2191]	8	120059780	120372036	1
ENSG00000103067	-0.296974	0.933874	-2.24934	0.0351881	0.0495815	-5.10023	80004 102466194	ESRP2	epithelial splicing regulatory protein 2 [Source:HGNC Symbol;Acc:HGNC:26152]	16	68229111	68238102	-1
ENSG00000167721	0.101706	7.12786	2.2483	0.0352646	0.0496857	-6.47632	55720	TSR1	TSR1, ribosome maturation factor [Source:HGNC Symbol;Acc:HGNC:25542]	17	2322503	2337507	-1
ENSG00000108561	0.125633	7.37045	2.2461	0.035426	0.0498908	-6.49542	708	C1QBP	complement C1q binding protein [Source:HGNC Symbol;Acc:HGNC:1243]	17	5432777	5448830	-1
ENSG00000145982	-0.187995	3.7537	-2.24302	0.0356537	0.0501705	-5.91652	10667	FARS2	phenylalanyl-tRNA synthetase 2, mitochondrial [Source:HGNC Symbol;Acc:HGNC:21062]	6	5261044	5771580	1
ENSG00000100403	0.102425	6.97184	2.24012	0.0358693	0.050444	-6.48187	23264	ZC3H7B	zinc finger CCCH-type containing 7B [Source:HGNC Symbol;Acc:HGNC:30869]	22	41301522	41360147	1
ENSG00000092208	0.142495	4.32783	2.23963	0.0359057	0.0504914	-6.08148	8487	GEMIN2	gem nuclear organelle associated protein 2 [Source:HGNC Symbol;Acc:HGNC:10884]	14	39114223	39136973	1
ENSG00000118246	0.115942	5.91004	2.23858	0.0359843	0.0505944	-6.38775	22868	FASTKD2	FAST kinase domains 2 [Source:HGNC Symbol;Acc:HGNC:29160]	2	206765357	206792509	1
ENSG00000185298	0.125791	5.35285	2.23797	0.0360302	0.0506515	-6.30411	339230	CCDC137	coiled-coil domain containing 137 [Source:HGNC Symbol;Acc:HGNC:33451]	17	81666364	81673904	1
ENSG00000104679	0.0950974	5.22944	2.23573	0.0361982	0.0508764	-6.28543	203069	R3HCC1	R3H domain and coiled-coil containing 1 [Source:HGNC Symbol;Acc:HGNC:27329]	8	23270120	23296279	1
ENSG00000273559	-0.128659	4.36384	-2.23556	0.036211	0.0508871	-6.09114	54883	CWC25	CWC25 spliceosome associated protein homolog [Source:HGNC Symbol;Acc:HGNC:25989]	17	38800434	38825481	-1
ENSG00000189266	0.0884019	7.40085	2.22149	0.0372827	0.0522845	-6.54364	55629	PNRC2	proline rich nuclear receptor coactivator 2 [Source:HGNC Symbol;Acc:HGNC:23158]	1	23959109	23963462	1
ENSG00000177700	-0.125707	6.16231	-2.22064	0.0373488	0.0523733	-6.44855	5441	POLR2L	RNA polymerase II subunit L [Source:HGNC Symbol;Acc:HGNC:9199]	11	837356	842545	-1
ENSG00000172062	0.315237	0.92821	2.21991	0.037405	0.0524366	-5.17097	6606 6607	SMN1	survival of motor neuron 1, telomeric [Source:HGNC Symbol;Acc:HGNC:11117]	5	70925030	70953942	1
ENSG00000115541	-0.141284	6.2404	-2.21732	0.0376064	0.0527033	-6.46306	3336	HSPE1	heat shock protein family E (Hsp10) member 1 [Source:HGNC Symbol;Acc:HGNC:5269]	2	197499994	197503457	1
ENSG00000103549	0.0730526	7.58607	2.21093	0.0381069	0.0533576	-6.57432	9810	RNF40	ring finger protein 40 [Source:HGNC Symbol;Acc:HGNC:16867]	16	30761745	30776307	1
ENSG00000178209	0.144178	6.00715	2.20888	0.0382683	0.0535638	-6.45627	5339	PLEC	plectin [Source:HGNC Symbol;Acc:HGNC:9069]	8	143915147	143976734	-1
ENSG00000174177	0.167921	4.02275	2.20462	0.0386068	0.0539938	-6.07046	348180	CTU2	cytosolic thiouridylase subunit 2 [Source:HGNC Symbol;Acc:HGNC:28005]	16	88706463	88715386	1
ENSG00000048991	-0.107518	4.92867	-2.20311	0.038727	0.0541538	-6.28297	23518	R3HDM1	R3H domain containing 1 [Source:HGNC Symbol;Acc:HGNC:9757]	2	135531455	135725270	1
ENSG00000186566	0.091442	5.62014	2.19203	0.0396225	0.0553124	-6.43427	23131	GPATCH8	G-patch domain containing 8 [Source:HGNC Symbol;Acc:HGNC:29066]	17	44395284	44503430	-1
ENSG00000155858	-0.096344	5.07525	-2.18655	0.0400724	0.0558788	-6.34433	134353	LSM11	LSM11, U7 small nuclear RNA associated [Source:HGNC Symbol;Acc:HGNC:30860]	5	157743695	157760709	1
ENSG00000099995	-0.102556	5.90241	-2.18519	0.0401843	0.0560224	-6.48427	10291	SF3A1	splicing factor 3a subunit 1 [Source:HGNC Symbol;Acc:HGNC:10765]	22	30331988	30356947	-1
ENSG00000168275	0.147563	3.8961	2.18317	0.0403519	0.0562189	-6.07691	388753	COA6	cytochrome c oxidase assembly factor 6 [Source:HGNC Symbol;Acc:HGNC:18025]	1	234373456	234384049	1
ENSG00000127054	-0.0908437	5.85738	-2.17566	0.0409791	0.0570048	-6.49614	54973 102465435	CPSF3L	cleavage and polyadenylation specific factor 3-like [Source:HGNC Symbol;Acc:HGNC:26052]	1	1311585	1324691	-1
ENSG00000171311	0.104887	4.66562	2.17073	0.041396	0.0575174	-6.29077	51013	EXOSC1	exosome component 1 [Source:HGNC Symbol;Acc:HGNC:17286]	10	97436142	97446017	-1
ENSG00000147130	-0.0817374	6.58439	-2.17057	0.0414094	0.0575318	-6.58327	9203	ZMYM3	zinc finger MYM-type containing 3 [Source:HGNC Symbol;Acc:HGNC:13054]	X	71239624	71255146	-1
ENSG00000096746	0.120892	5.757	2.16721	0.0416964	0.0578966	-6.50115	3189	HNRNPH3	heterogeneous nuclear ribonucleoprotein H3 [Source:HGNC Symbol;Acc:HGNC:5043]	10	68331174	68343191	1
ENSG00000198919	-0.095474	6.28529	-2.15505	0.0427477	0.0592176	-6.58472	9666	DZIP3	DAZ interacting zinc finger protein 3 [Source:HGNC Symbol;Acc:HGNC:30938]	3	108589682	108694846	1
ENSG00000146834	-0.105607	6.1244	-2.15393	0.0428455	0.0593444	-6.56936	56257	MEPCE	methylphosphate capping enzyme [Source:HGNC Symbol;Acc:HGNC:20247]	7	100428790	100434126	1
ENSG00000123154	0.0957663	4.85314	2.15342	0.0428898	0.0593844	-6.36412	84292	WDR83	WD repeat domain 83 [Source:HGNC Symbol;Acc:HGNC:32672]	19	12666800	12675832	1
ENSG00000196419	-0.0835735	8.7109	-2.14993	0.0431974	0.0597839	-6.74773	2547	XRCC6	X-ray repair cross complementing 6 [Source:HGNC Symbol;Acc:HGNC:4055]	22	41621119	41664048	1
ENSG00000183684	-0.109955	6.8593	-2.14568	0.0435735	0.0602737	-6.64965	10189	ALYREF	Aly/REF export factor [Source:HGNC Symbol;Acc:HGNC:19071]	17	81887844	81891586	-1
ENSG00000100836	0.0851171	7.31284	2.1426	0.0438485	0.0606231	-6.68561	8106	PABPN1	poly(A) binding protein nuclear 1 [Source:HGNC Symbol;Acc:HGNC:8565]	14	23321289	23326185	1
ENSG00000156110	-0.0842237	5.33635	-2.1401	0.0440734	0.0609207	-6.48023	132	ADK	adenosine kinase [Source:HGNC Symbol;Acc:HGNC:257]	10	74151185	74709303	1
ENSG00000116668	0.19202	3.07621	2.13945	0.0441311	0.0609917	-5.93447	54823	SWT1	SWT1, RNA endoribonuclease homolog [Source:HGNC Symbol;Acc:HGNC:16785]	1	185157080	185291765	1
ENSG00000123297	0.111811	4.86606	2.13247	0.0447634	0.0618115	-6.40578	10102	TSFM	Ts translation elongation factor, mitochondrial [Source:HGNC Symbol;Acc:HGNC:12367]	12	57782589	57808071	1
ENSG00000067048	0.0823427	6.85513	2.13213	0.0447947	0.0618457	-6.67579	8653	DDX3Y	DEAD-box helicase 3, Y-linked [Source:HGNC Symbol;Acc:HGNC:2699]	Y	12904108	12920478	1
ENSG00000132394	0.145151	3.42867	2.13007	0.0449827	0.0620782	-6.04867	60678	EEFSEC	eukaryotic elongation factor, selenocysteine-tRNA specific [Source:HGNC Symbol;Acc:HGNC:24614]	3	128153454	128408646	1
ENSG00000151014	0.136431	3.51891	2.12962	0.0450244	0.0621266	-6.07396	25819	NOCT	nocturnin [Source:HGNC Symbol;Acc:HGNC:14254]	4	139015789	139045939	1
ENSG00000169217	0.0734245	6.48699	2.12287	0.0456465	0.0628982	-6.6647	10421	CD2BP2	CD2 cytoplasmic tail binding protein 2 [Source:HGNC Symbol;Acc:HGNC:1656]	16	30350766	30355361	-1
ENSG00000109832	0.417458	0.106959	2.12161	0.0457634	0.0630547	-5.1364	29118	DDX25	DEAD-box helicase 25 [Source:HGNC Symbol;Acc:HGNC:18698]	11	125903348	125943702	1
ENSG00000182774	0.119984	8.7024	2.11979	0.0459328	0.0632697	-6.80375	6218	RPS17	ribosomal protein S17 [Source:HGNC Symbol;Acc:HGNC:10397]	15	82536753	82540564	-1
ENSG00000198917	0.104797	5.7223	2.10983	0.0468715	0.0644785	-6.60173	51490	SPOUT1	SPOUT domain containing methyltransferase 1 [Source:HGNC Symbol;Acc:HGNC:26933]	9	128819651	128829821	-1
ENSG00000107371	0.0901939	5.40676	2.10876	0.0469732	0.064609	-6.55338	51010	EXOSC3	exosome component 3 [Source:HGNC Symbol;Acc:HGNC:17944]	9	37766978	37801437	-1
ENSG00000167526	0.0922764	8.1658	2.09339	0.0484569	0.0665174	-6.82432	6137	RPL13	ribosomal protein L13 [Source:HGNC Symbol;Acc:HGNC:10303]	16	89560657	89566828	1
ENSG00000164941	0.0875458	6.81721	2.09333	0.0484634	0.0665189	-6.74411	55656	INTS8	integrator complex subunit 8 [Source:HGNC Symbol;Acc:HGNC:26048]	8	94813311	94881746	1
ENSG00000105671	0.0997626	5.32089	2.09294	0.0485013	0.066566	-6.56742	54555	DDX49	DEAD-box helicase 49 [Source:HGNC Symbol;Acc:HGNC:18684]	19	18919675	18928633	1
ENSG00000090621	0.078562	6.30104	2.08758	0.0490293	0.0672366	-6.71185	8761	PABPC4	poly(A) binding protein cytoplasmic 4 [Source:HGNC Symbol;Acc:HGNC:8557]	1	39560816	39576790	-1
ENSG00000079134	0.0771779	6.09784	2.08486	0.0492986	0.0675724	-6.69516	9984	THOC1	THO complex 1 [Source:HGNC Symbol;Acc:HGNC:19070]	18	214520	268050	-1
ENSG00000122965	0.0941318	6.03674	2.08459	0.0493256	0.0676045	-6.68885	9904	RBM19	RNA binding motif protein 19 [Source:HGNC Symbol;Acc:HGNC:29098]	12	113816738	113966371	-1
ENSG00000125743	0.0957691	7.12033	2.07467	0.0503219	0.0689004	-6.79789	6633	SNRPD2	small nuclear ribonucleoprotein D2 polypeptide [Source:HGNC Symbol;Acc:HGNC:11159]	19	45687454	45692569	-1
ENSG00000170473	0.088561	5.84578	2.05555	0.0522923	0.0714128	-6.71717	84305	PYM1	PYM homolog 1, exon junction complex associated factor [Source:HGNC Symbol;Acc:HGNC:30258]	12	55901413	55932618	-1
ENSG00000140939	-0.222883	2.25557	-2.03593	0.0543857	0.0740955	-5.87443	8996	NOL3	nucleolar protein 3 [Source:HGNC Symbol;Acc:HGNC:7869]	16	67170154	67175735	1
ENSG00000134597	0.103171	4.44675	2.03554	0.0544279	0.0741478	-6.48547	51634	RBMX2	RNA binding motif protein, X-linked 2 [Source:HGNC Symbol;Acc:HGNC:24282]	X	130401969	130413343	1
ENSG00000109534	0.168519	3.4708	2.03262	0.0547468	0.0745662	-6.2371	54433	GAR1	GAR1 ribonucleoprotein [Source:HGNC Symbol;Acc:HGNC:14264]	4	109815510	109824740	1
ENSG00000173230	-0.134767	7.12967	-2.02405	0.0556894	0.0757361	-6.88772	2804	GOLGB1	golgin B1 [Source:HGNC Symbol;Acc:HGNC:4429]	3	121663199	121749767	-1
ENSG00000135250	-0.0876532	6.11424	-2.02116	0.0560112	0.0761353	-6.80929	6733	SRPK2	SRSF protein kinase 2 [Source:HGNC Symbol;Acc:HGNC:11306]	7	105110704	105399308	-1
ENSG00000172172	0.0966386	5.12592	2.01793	0.0563722	0.0765986	-6.66558	28998	MRPL13	mitochondrial ribosomal protein L13 [Source:HGNC Symbol;Acc:HGNC:14278]	8	120380761	120445402	-1
ENSG00000012048	0.108759	6.31018	2.0162	0.0565662	0.0768292	-6.84103	672	BRCA1	BRCA1, DNA repair associated [Source:HGNC Symbol;Acc:HGNC:1100]	17	43044295	43170245	-1
ENSG00000141642	0.114411	4.08664	2.00496	0.0578438	0.0784287	-6.44984	55520	ELAC1	elaC ribonuclease Z 1 [Source:HGNC Symbol;Acc:HGNC:14197]	18	50967991	50988121	1
ENSG00000229117	-0.120056	4.7974	-2.00172	0.0582165	0.0788956	-6.62111	6171	RPL41	ribosomal protein L41 [Source:HGNC Symbol;Acc:HGNC:10354]	12	56116586	56117943	1
ENSG00000132507	-0.125995	7.96052	-1.9993	0.0584956	0.0792454	-6.98031	1984	EIF5A	eukaryotic translation initiation factor 5A [Source:HGNC Symbol;Acc:HGNC:3300]	17	7306999	7312463	1
ENSG00000106803	-0.110088	5.59127	-1.99783	0.0586661	0.0794595	-6.77923	10952	SEC61B	Sec61 translocon beta subunit [Source:HGNC Symbol;Acc:HGNC:16993]	9	99222064	99230615	1
ENSG00000177954	0.146243	3.54133	1.97496	0.0613774	0.0828262	-6.3574	6232	RPS27	ribosomal protein S27 [Source:HGNC Symbol;Acc:HGNC:10416]	1	153990759	153992150	1
ENSG00000143947	0.108138	7.24882	1.97173	0.0617696	0.0833062	-6.98874	6233	RPS27A	ribosomal protein S27a [Source:HGNC Symbol;Acc:HGNC:10417]	2	55231903	55235853	1
ENSG00000126254	-0.100244	5.40986	-1.97161	0.0617848	0.0833208	-6.79532	79171	RBM42	RNA binding motif protein 42 [Source:HGNC Symbol;Acc:HGNC:28117]	19	35629030	35637686	1
ENSG00000084463	0.0684247	6.5807	1.97143	0.0618062	0.0833437	-6.94351	51729	WBP11	WW domain binding protein 11 [Source:HGNC Symbol;Acc:HGNC:16461]	12	14784579	14803540	-1
ENSG00000204590	-0.074444	6.01922	-1.96966	0.0620224	0.0836116	-6.88887	2794	GNL1	G protein nucleolar 1 (putative) [Source:HGNC Symbol;Acc:HGNC:4413]	6	30541377	30557174	-1
ENSG00000092201	0.0734169	8.89397	1.95901	0.0633344	0.0852409	-7.09951	11198	SUPT16H	SPT16 homolog, facilitates chromatin remodeling subunit [Source:HGNC Symbol;Acc:HGNC:11465]	14	21351472	21384266	-1
ENSG00000103707	0.118681	4.00531	1.95188	0.0642258	0.0863304	-6.52153	123263	MTFMT	mitochondrial methionyl-tRNA formyltransferase [Source:HGNC Symbol;Acc:HGNC:29666]	15	65001512	65029639	-1
ENSG00000100764	0.128862	3.75518	1.95138	0.0642886	0.0864026	-6.45624	5700	PSMC1	proteasome 26S subunit, ATPase 1 [Source:HGNC Symbol;Acc:HGNC:9547]	14	90256495	90275429	1
ENSG00000076924	0.104908	4.91657	1.9437	0.0652631	0.0875635	-6.75319	56949	XAB2	XPA binding protein 2 [Source:HGNC Symbol;Acc:HGNC:14089]	19	7619525	7629565	-1
ENSG00000105364	0.118446	4.65423	1.93708	0.0661135	0.0886168	-6.7074	51073	MRPL4	mitochondrial ribosomal protein L4 [Source:HGNC Symbol;Acc:HGNC:14276]	19	10251901	10260045	1
ENSG00000179115	0.0946727	6.18991	1.93426	0.0664791	0.0890502	-6.97179	2193	FARSA	phenylalanyl-tRNA synthetase alpha subunit [Source:HGNC Symbol;Acc:HGNC:3592]	19	12922479	12934037	-1
ENSG00000130723	0.0683881	7.79494	1.93397	0.0665168	0.0890944	-7.08591	84726	PRRC2B	proline rich coiled-coil 2B [Source:HGNC Symbol;Acc:HGNC:28121]	9	131394093	131500197	1
ENSG00000134440	-0.0771213	7.60004	-1.93028	0.0669964	0.0896609	-7.08031	4677	NARS	asparaginyl-tRNA synthetase [Source:HGNC Symbol;Acc:HGNC:7643]	18	57600656	57622213	-1
ENSG00000187024	0.246113	1.26905	1.92739	0.0673751	0.0901232	-5.79136	138428	PTRH1	peptidyl-tRNA hydrolase 1 homolog [Source:HGNC Symbol;Acc:HGNC:27039]	9	127692978	127724873	-1
ENSG00000183431	-0.0913067	7.22678	-1.91961	0.0684041	0.0913965	-7.07631	10946	SF3A3	splicing factor 3a subunit 3 [Source:HGNC Symbol;Acc:HGNC:10767]	1	37956975	37990921	-1
ENSG00000149792	-0.0801519	6.12166	-1.91815	0.0685986	0.091637	-6.98985	740	MRPL49	mitochondrial ribosomal protein L49 [Source:HGNC Symbol;Acc:HGNC:1176]	11	65122183	65127371	1
ENSG00000132463	0.0730035	7.26529	1.9172	0.068726	0.0917685	-7.0838	2926	GRSF1	G-rich RNA sequence binding factor 1 [Source:HGNC Symbol;Acc:HGNC:4610]	4	70815782	70839945	-1
ENSG00000100941	0.100349	7.613	1.91533	0.0689757	0.0920759	-7.10767	5411	PNN	pinin, desmosome associated protein [Source:HGNC Symbol;Acc:HGNC:9162]	14	39175183	39183218	1
ENSG00000124784	0.093958	5.496	1.90089	0.0709368	0.0943818	-6.93536	83732	RIOK1	RIO kinase 1 [Source:HGNC Symbol;Acc:HGNC:18656]	6	7389496	7418037	1
ENSG00000080608	0.118927	5.92474	1.89151	0.0722362	0.0959693	-7.01409	9933	PUM3	pumilio RNA binding family member 3 [Source:HGNC Symbol;Acc:HGNC:29676]	9	2720469	2844241	-1
ENSG00000142541	0.06488	8.59497	1.89042	0.0723879	0.0961322	-7.20309	23521	RPL13A	ribosomal protein L13a [Source:HGNC Symbol;Acc:HGNC:10304]	19	49487554	49492308	1
ENSG00000168101	-0.0989023	4.39101	-1.88735	0.0728191	0.0966422	-6.72422	84309	NUDT16L1	nudix hydrolase 16 like 1 [Source:HGNC Symbol;Acc:HGNC:28154]	16	4693694	4695859	1
ENSG00000155827	-0.0730739	6.53564	-1.88456	0.0732113	0.0971492	-7.08771	56254	RNF20	ring finger protein 20 [Source:HGNC Symbol;Acc:HGNC:10062]	9	101533851	101563344	1
ENSG00000102786	0.0723274	6.70929	1.88074	0.0737537	0.0978347	-7.10917	26512	INTS6	integrator complex subunit 6 [Source:HGNC Symbol;Acc:HGNC:14879]	13	51354077	51454264	-1
ENSG00000124795	0.0752044	8.48428	1.86884	0.0754629	0.0999484	-7.23401	7913	DEK	DEK proto-oncogene [Source:HGNC Symbol;Acc:HGNC:2768]	6	18223868	18264823	-1
ENSG00000175792	0.0759445	6.8826	1.86674	0.075768	0.100296	-7.14497	8607	RUVBL1	RuvB like AAA ATPase 1 [Source:HGNC Symbol;Acc:HGNC:10474]	3	128064778	128153914	-1
ENSG00000087365	0.0584229	8.01468	1.85868	0.0769486	0.10176	-7.22597	10992	SF3B2	splicing factor 3b subunit 2 [Source:HGNC Symbol;Acc:HGNC:10769]	11	66050729	66069308	1
ENSG00000007376	-0.149377	4.45276	-1.85801	0.0770478	0.101855	-6.78711	113000	RPUSD1	RNA pseudouridylate synthase domain containing 1 [Source:HGNC Symbol;Acc:HGNC:14173]	16	784974	788397	-1
ENSG00000117751	0.0689207	6.60561	1.8567	0.0772409	0.102082	-7.14157	5511	PPP1R8	protein phosphatase 1 regulatory subunit 8 [Source:HGNC Symbol;Acc:HGNC:9296]	1	27830778	27851676	1
ENSG00000108825	-0.105399	4.25898	-1.84275	0.0793316	0.104641	-6.76608	100885850	PTGES3L-AARSD1	PTGES3L-AARSD1 readthrough [Source:HGNC Symbol;Acc:HGNC:43946]	17	42950526	42980528	-1
ENSG00000162971	0.113557	4.53467	1.83486	0.0805352	0.106111	-6.85227	129450	TYW5	tRNA-yW synthesizing protein 5 [Source:HGNC Symbol;Acc:HGNC:26754]	2	199929975	199955736	-1
ENSG00000112584	0.0824321	5.45971	1.83349	0.0807461	0.106359	-7.04231	84498	FAM120B	family with sequence similarity 120B [Source:HGNC Symbol;Acc:HGNC:21109]	6	170290703	170407065	1
ENSG00000140830	-0.129811	3.74945	-1.83281	0.0808502	0.106467	-6.64814	54957	TXNL4B	thioredoxin like 4B [Source:HGNC Symbol;Acc:HGNC:26041]	16	72044289	72094431	-1
ENSG00000173545	0.105135	4.57149	1.83211	0.0809577	0.106601	-6.8653	90441	ZNF622	zinc finger protein 622 [Source:HGNC Symbol;Acc:HGNC:30958]	5	16451519	16465792	-1
ENSG00000101146	-0.0757323	6.09318	-1.82765	0.0816481	0.107354	-7.13901	8480	RAE1	ribonucleic acid export 1 [Source:HGNC Symbol;Acc:HGNC:9828]	20	57351010	57379211	1
ENSG00000072518	0.0924214	4.64213	1.82093	0.0826986	0.108652	-6.9	2011	MARK2	microtubule affinity regulating kinase 2 [Source:HGNC Symbol;Acc:HGNC:3332]	11	63838928	63911019	1
ENSG00000197102	0.0657517	9.66756	1.81764	0.0832165	0.109249	-7.37006	1778	DYNC1H1	dynein cytoplasmic 1 heavy chain 1 [Source:HGNC Symbol;Acc:HGNC:2961]	14	101964528	102050792	1
ENSG00000189091	0.0641957	8.77318	1.81674	0.0833588	0.109398	-7.33474	23450	SF3B3	splicing factor 3b subunit 3 [Source:HGNC Symbol;Acc:HGNC:10770]	16	70523788	70577670	1
ENSG00000164924	-0.0687152	8.72923	-1.80546	0.0851606	0.111624	-7.35056	7534	YWHAZ	tyrosine 3-monooxygenase/tryptophan 5-monooxygenase activation protein zeta [Source:HGNC Symbol;Acc:HGNC:12855]	8	100916525	100953388	-1
ENSG00000197265	0.102615	4.93303	1.80529	0.0851876	0.111652	-6.98968	2961	GTF2E2	general transcription factor IIE subunit 2 [Source:HGNC Symbol;Acc:HGNC:4651]	8	30578318	30658251	-1
ENSG00000253626	-0.117825	5.3188	-1.80376	0.0854357	0.111961	-7.0627	143244	EIF5AL1	eukaryotic translation initiation factor 5A-like 1 [Source:HGNC Symbol;Acc:HGNC:17419]	10	79512601	79516440	1
ENSG00000214022	-0.0709114	6.98275	-1.79896	0.0862136	0.112918	-7.26296	29803	REPIN1	replication initiator 1 [Source:HGNC Symbol;Acc:HGNC:17922]	7	150368189	150374044	1
ENSG00000111640	0.0514856	11.5072	1.79885	0.0862324	0.112935	-7.46521	2597	GAPDH	glyceraldehyde-3-phosphate dehydrogenase [Source:HGNC Symbol;Acc:HGNC:4141]	12	6533927	6538374	1
ENSG00000175467	-0.0813669	5.64001	-1.78681	0.0882129	0.115274	-7.14502	9092	SART1	squamous cell carcinoma antigen recognized by T-cells 1 [Source:HGNC Symbol;Acc:HGNC:10538]	11	65961689	65979828	1
ENSG00000084623	-0.0768559	7.10507	-1.78464	0.0885733	0.11569	-7.29415	8668	EIF3I	eukaryotic translation initiation factor 3 subunit I [Source:HGNC Symbol;Acc:HGNC:3272]	1	32221928	32231604	1
ENSG00000158545	0.0898149	5.53995	1.78294	0.0888572	0.116029	-7.13843	124245	ZC3H18	zinc finger CCCH-type containing 18 [Source:HGNC Symbol;Acc:HGNC:25091]	16	88570381	88631966	1
ENSG00000100029	0.0891442	6.86125	1.7777	0.0897379	0.11709	-7.29052	23481	PES1	pescadillo ribosomal biogenesis factor 1 [Source:HGNC Symbol;Acc:HGNC:8848]	22	30576625	30607083	-1
ENSG00000183665	-0.107017	4.34604	-1.75902	0.092936	0.120922	-6.92464	55039	TRMT12	tRNA methyltransferase 12 homolog [Source:HGNC Symbol;Acc:HGNC:26091]	8	124450820	124462150	1
ENSG00000120699	-0.0648408	6.38841	-1.75552	0.0935454	0.121623	-7.28743	11340	EXOSC8	exosome component 8 [Source:HGNC Symbol;Acc:HGNC:17035]	13	36998816	37009613	1
ENSG00000115677	0.0517227	9.41977	1.75432	0.0937564	0.121864	-7.46351	3069	HDLBP	high density lipoprotein binding protein [Source:HGNC Symbol;Acc:HGNC:4857]	2	241227264	241317061	-1
ENSG00000132305	0.0614914	7.36877	1.7508	0.0943747	0.122542	-7.36578	10989	IMMT	inner membrane mitochondrial protein [Source:HGNC Symbol;Acc:HGNC:6047]	2	86143932	86195770	-1
ENSG00000204356	-0.0679529	5.93079	-1.74383	0.0956086	0.124017	-7.25567	7936 100302242	NELFE	negative elongation factor complex member E [Source:HGNC Symbol;Acc:HGNC:13974]	6	31952087	31959110	-1
ENSG00000106263	0.0777591	7.96838	1.74302	0.0957527	0.124178	-7.4127	8662	EIF3B	eukaryotic translation initiation factor 3 subunit B [Source:HGNC Symbol;Acc:HGNC:3280]	7	2354086	2380745	1
ENSG00000123352	-0.0815986	5.66772	-1.7416	0.0960069	0.124491	-7.22203	65244	SPATS2	spermatogenesis associated serine rich 2 [Source:HGNC Symbol;Acc:HGNC:18650]	12	49366584	49527424	1
ENSG00000122566	0.0741365	9.77912	1.74145	0.0960323	0.124515	-7.49779	3181	HNRNPA2B1	heterogeneous nuclear ribonucleoprotein A2/B1 [Source:HGNC Symbol;Acc:HGNC:5033]	7	26189927	26201529	-1
ENSG00000168724	-0.0772218	5.99715	-1.73908	0.0964571	0.12504	-7.2713	134218	DNAJC21	DnaJ heat shock protein family (Hsp40) member C21 [Source:HGNC Symbol;Acc:HGNC:27030]	5	34929593	34958964	1
ENSG00000213782	0.07696	6.31928	1.73829	0.0965999	0.1252	-7.3099	51202	DDX47	DEAD-box helicase 47 [Source:HGNC Symbol;Acc:HGNC:18682]	12	12813316	12829981	1
ENSG00000158941	0.0653215	7.4583	1.73652	0.096917	0.125577	-7.39388	57805	CCAR2	cell cycle and apoptosis regulator 2 [Source:HGNC Symbol;Acc:HGNC:23360]	8	22604632	22621514	1
ENSG00000134453	0.0663656	6.17386	1.72506	0.0990012	0.128067	-7.31586	84991	RBM17	RNA binding motif protein 17 [Source:HGNC Symbol;Acc:HGNC:16944]	10	6088987	6117457	1
ENSG00000156304	0.0965348	4.73543	1.72378	0.0992371	0.128346	-7.07818	57466	SCAF4	SR-related CTD associated factor 4 [Source:HGNC Symbol;Acc:HGNC:19304]	21	31671033	31732075	-1
ENSG00000100603	-0.0621569	6.18685	-1.7181	0.100285	0.129613	-7.32665	22938	SNW1	SNW domain containing 1 [Source:HGNC Symbol;Acc:HGNC:16696]	14	77717599	77761207	-1
ENSG00000169180	0.0690265	7.12247	1.71677	0.100532	0.129906	-7.40486	23214	XPO6	exportin 6 [Source:HGNC Symbol;Acc:HGNC:19733]	16	28097979	28211920	-1
ENSG00000148090	0.152827	2.66102	1.71564	0.100744	0.130161	-6.54186	549	AUH	AU RNA binding methylglutaconyl-CoA hydratase [Source:HGNC Symbol;Acc:HGNC:890]	9	91213815	91361913	-1
ENSG00000124571	0.0712448	7.19765	1.71176	0.101467	0.131006	-7.41747	57510	XPO5	exportin 5 [Source:HGNC Symbol;Acc:HGNC:17675]	6	43522330	43576075	-1
ENSG00000152520	0.0673128	5.52104	1.71168	0.101482	0.131017	-7.24903	255967	PAN3	PAN3 poly(A) specific ribonuclease subunit [Source:HGNC Symbol;Acc:HGNC:29991]	13	28138506	28295335	1
ENSG00000172171	0.117814	4.02597	1.70279	0.103161	0.133013	-6.93848	79736	TEFM	transcription elongation factor, mitochondrial [Source:HGNC Symbol;Acc:HGNC:26223]	17	30897336	30906820	-1
ENSG00000134056	-0.123305	3.22167	-1.69868	0.103943	0.133948	-6.71948	92259	MRPS36	mitochondrial ribosomal protein S36 [Source:HGNC Symbol;Acc:HGNC:16631]	5	69217760	69230129	1
ENSG00000079313	0.110487	4.21063	1.69641	0.104379	0.134464	-6.99562	57455 100302210	REXO1	RNA exonuclease 1 homolog [Source:HGNC Symbol;Acc:HGNC:24616]	19	1815246	1848463	-1
ENSG00000198952	0.0697986	7.66326	1.69144	0.105336	0.135605	-7.47688	23381	SMG5	SMG5, nonsense mediated mRNA decay factor [Source:HGNC Symbol;Acc:HGNC:24644]	1	156249224	156282825	-1
ENSG00000071626	-0.0811679	6.37108	-1.68591	0.106411	0.136841	-7.39563	26528	DAZAP1	DAZ associated protein 1 [Source:HGNC Symbol;Acc:HGNC:2683]	19	1407569	1435687	1
ENSG00000204842	0.0823452	4.71442	1.68306	0.106968	0.137492	-7.13698	6311	ATXN2	ataxin 2 [Source:HGNC Symbol;Acc:HGNC:10555]	12	111452214	111599676	-1
ENSG00000160213	-0.0790625	5.51976	-1.67838	0.107888	0.138575	-7.29819	1476	CSTB	cystatin B [Source:HGNC Symbol;Acc:HGNC:2482]	21	43772512	43776445	-1
ENSG00000126524	0.0933966	5.12953	1.67781	0.108001	0.138698	-7.2326	51119	SBDS	SBDS ribosome assembly guanine nucleotide exchange factor [Source:HGNC Symbol;Acc:HGNC:19440]	7	66987677	66995601	-1
ENSG00000181588	0.0879811	5.7572	1.67661	0.108239	0.138979	-7.34013	399664	MEX3D	mex-3 RNA binding family member D [Source:HGNC Symbol;Acc:HGNC:16734]	19	1554669	1568058	-1
ENSG00000130816	-0.0716343	8.01194	-1.67116	0.109321	0.140231	-7.52726	1786	DNMT1	DNA methyltransferase 1 [Source:HGNC Symbol;Acc:HGNC:2976]	19	10133345	10231286	-1
ENSG00000167315	0.059846	6.4085	1.66486	0.110585	0.14169	-7.43326	10449	ACAA2	acetyl-CoA acyltransferase 2 [Source:HGNC Symbol;Acc:HGNC:83]	18	49782167	49813960	-1
ENSG00000253729	0.0557167	10.0042	1.66131	0.111304	0.142515	-7.63161	5591	PRKDC	protein kinase, DNA-activated, catalytic polypeptide [Source:HGNC Symbol;Acc:HGNC:9413]	8	47773108	47960183	-1
ENSG00000152464	0.109211	3.78966	1.65857	0.111859	0.143101	-6.94423	10557	RPP38	ribonuclease P/MRP subunit p38 [Source:HGNC Symbol;Acc:HGNC:30329]	10	15097180	15139818	1
ENSG00000173681	0.116471	3.32017	1.65735	0.112108	0.14338	-6.81788	256643	CXorf23	chromosome X open reading frame 23 [Source:HGNC Symbol;Acc:HGNC:27413]	X	19912860	19970298	-1
ENSG00000023734	0.0591766	7.77181	1.65692	0.112197	0.143475	-7.53648	11171	STRAP	serine/threonine kinase receptor associated protein [Source:HGNC Symbol;Acc:HGNC:30796]	12	15882391	15903478	1
ENSG00000090060	0.0628612	7.62511	1.65438	0.112716	0.14406	-7.53201	10914	PAPOLA	poly(A) polymerase alpha [Source:HGNC Symbol;Acc:HGNC:14981]	14	96501433	96567111	1
ENSG00000104129	0.0889425	4.3748	1.65364	0.112867	0.144234	-7.10243	55192	DNAJC17	DnaJ heat shock protein family (Hsp40) member C17 [Source:HGNC Symbol;Acc:HGNC:25556]	15	40765155	40807478	-1
ENSG00000159111	0.073216	5.33668	1.64465	0.114723	0.146409	-7.32176	124995	MRPL10	mitochondrial ribosomal protein L10 [Source:HGNC Symbol;Acc:HGNC:14055]	17	47823272	47831534	-1
ENSG00000198585	-0.0639847	6.15744	-1.6362	0.116493	0.148483	-7.45045	131870	NUDT16	nudix hydrolase 16 [Source:HGNC Symbol;Acc:HGNC:26442]	3	131381671	131388830	1
ENSG00000174173	-0.0722609	5.39221	-1.63376	0.117008	0.149094	-7.34542	54931	TRMT10C	tRNA methyltransferase 10C, mitochondrial RNase P subunit [Source:HGNC Symbol;Acc:HGNC:26022]	3	101561862	101566446	1
ENSG00000170027	0.0667045	8.95573	1.62554	0.118756	0.151146	-7.64531	7532	YWHAG	tyrosine 3-monooxygenase/tryptophan 5-monooxygenase activation protein gamma [Source:HGNC Symbol;Acc:HGNC:12852]	7	76326794	76359031	-1
ENSG00000103510	-0.0662138	5.63015	-1.62266	0.119373	0.151863	-7.40145	84148	KAT8	lysine acetyltransferase 8 [Source:HGNC Symbol;Acc:HGNC:17933]	16	31115754	31131393	1
ENSG00000160799	-0.0878659	4.41477	-1.59657	0.125094	0.158525	-7.19405	151903	CCDC12	coiled-coil domain containing 12 [Source:HGNC Symbol;Acc:HGNC:28332]	3	46921726	46982010	-1
ENSG00000126461	-0.124262	4.29251	-1.59594	0.125237	0.158663	-7.16349	58506	SCAF1	SR-related CTD associated factor 1 [Source:HGNC Symbol;Acc:HGNC:30403]	19	49642125	49658642	1
ENSG00000100697	0.0689809	8.40323	1.5944	0.125582	0.159037	-7.6656	23405	DICER1	dicer 1, ribonuclease III [Source:HGNC Symbol;Acc:HGNC:17098]	14	95086228	95158010	-1
ENSG00000162408	0.0660946	6.40005	1.59199	0.126123	0.159701	-7.543	79707	NOL9	nucleolar protein 9 [Source:HGNC Symbol;Acc:HGNC:26265]	1	6521347	6554535	-1
ENSG00000144161	-0.101253	4.31853	-1.58959	0.126665	0.160322	-7.18036	84524	ZC3H8	zinc finger CCCH-type containing 8 [Source:HGNC Symbol;Acc:HGNC:30941]	2	112211525	112255136	-1
ENSG00000101150	-0.0647263	6.19131	-1.58327	0.128098	0.161987	-7.53359	7165	TPD52L2	tumor protein D52 like 2 [Source:HGNC Symbol;Acc:HGNC:12007]	20	63865228	63891545	1
ENSG00000177469	-0.520298	1.42267	-1.58014	0.128814	0.16279	-6.36595	284119	PTRF	polymerase I and transcript release factor [Source:HGNC Symbol;Acc:HGNC:9688]	17	42402452	42423517	-1
ENSG00000162385	0.083961	4.6531	1.57779	0.129353	0.163377	-7.28296	4116	MAGOH	mago homolog, exon junction complex core component [Source:HGNC Symbol;Acc:HGNC:6815]	1	53226892	53238610	-1
ENSG00000142252	0.0875002	4.44401	1.55395	0.134931	0.169891	-7.26859	79760	GEMIN7	gem nuclear organelle associated protein 7 [Source:HGNC Symbol;Acc:HGNC:20045]	19	45079195	45091524	1
ENSG00000164167	0.0912206	4.43885	1.54157	0.137907	0.173373	-7.28544	11157	LSM6	LSM6 homolog, U6 small nuclear RNA and mRNA degradation associated [Source:HGNC Symbol;Acc:HGNC:17017]	4	146175685	146200000	1
ENSG00000052749	-0.10484	5.34455	-1.53893	0.138549	0.174111	-7.47699	23223	RRP12	ribosomal RNA processing 12 homolog [Source:HGNC Symbol;Acc:HGNC:29100]	10	97356358	97426076	-1
ENSG00000130811	-0.0648276	6.34114	-1.53291	0.140021	0.175809	-7.62269	8666	EIF3G	eukaryotic translation initiation factor 3 subunit G [Source:HGNC Symbol;Acc:HGNC:3274]	19	10115017	10119918	-1
ENSG00000064419	-0.0516184	7.21986	-1.52867	0.141063	0.177024	-7.69443	23534	TNPO3	transportin 3 [Source:HGNC Symbol;Acc:HGNC:17103]	7	128954180	129055173	-1
ENSG00000116288	0.0671361	6.88176	1.52155	0.142832	0.179006	-7.6837	11315	PARK7	Parkinsonism associated deglycase [Source:HGNC Symbol;Acc:HGNC:16369]	1	7954291	7985505	1
ENSG00000099783	0.0645357	7.93704	1.51408	0.144707	0.181189	-7.75777	4670	HNRNPM	heterogeneous nuclear ribonucleoprotein M [Source:HGNC Symbol;Acc:HGNC:5046]	19	8444767	8489114	1
ENSG00000125901	0.101491	4.97607	1.50783	0.146291	0.18304	-7.4551	64949	MRPS26	mitochondrial ribosomal protein S26 [Source:HGNC Symbol;Acc:HGNC:14045]	20	3045945	3048254	1
ENSG00000160214	0.0942334	5.1983	1.49542	0.149479	0.186647	-7.51645	8568	RRP1	ribosomal RNA processing 1 [Source:HGNC Symbol;Acc:HGNC:18785]	21	43789513	43805293	1
ENSG00000184863	0.0737036	5.32115	1.49465	0.149676	0.186868	-7.53984	155435	RBM33	RNA binding motif protein 33 [Source:HGNC Symbol;Acc:HGNC:27223]	7	155644451	155781485	1
ENSG00000184967	0.118975	4.1045	1.49367	0.149931	0.187125	-7.271	79050	NOC4L	nucleolar complex associated 4 homolog [Source:HGNC Symbol;Acc:HGNC:28461]	12	132144448	132152473	1
ENSG00000124541	-0.0608858	6.33894	-1.4921	0.15034	0.187586	-7.68087	88745	RRP36	ribosomal RNA processing 36 [Source:HGNC Symbol;Acc:HGNC:21374]	6	43021645	43034156	1
ENSG00000133226	0.0599516	5.81083	1.47264	0.155473	0.193318	-7.64839	10250	SRRM1	serine and arginine repetitive matrix 1 [Source:HGNC Symbol;Acc:HGNC:16638]	1	24631716	24673267	1
ENSG00000137040	0.0575735	6.48517	1.45239	0.160969	0.199667	-7.75114	26953	RANBP6	RAN binding protein 6 [Source:HGNC Symbol;Acc:HGNC:9851]	9	6011043	6015625	-1
ENSG00000138668	0.0594665	6.37707	1.45091	0.161375	0.200109	-7.74342	3184	HNRNPD	heterogeneous nuclear ribonucleoprotein D [Source:HGNC Symbol;Acc:HGNC:5036]	4	82352498	82374503	-1
ENSG00000070785	0.0653123	5.29661	1.4504	0.161516	0.200267	-7.59723	8891	EIF2B3	eukaryotic translation initiation factor 2B subunit gamma [Source:HGNC Symbol;Acc:HGNC:3259]	1	44850522	44986722	-1
ENSG00000106245	0.0637478	5.95892	1.44933	0.161813	0.200557	-7.70016	8896	BUD31	BUD31 homolog [Source:HGNC Symbol;Acc:HGNC:29629]	7	99408641	99419616	1
ENSG00000086200	0.0741747	6.19697	1.44069	0.164213	0.203173	-7.73963	51194	IPO11	importin 11 [Source:HGNC Symbol;Acc:HGNC:20628]	5	62403972	62628582	1
ENSG00000066651	0.0723614	4.95979	1.43932	0.164598	0.20357	-7.5471	60487	TRMT11	tRNA methyltransferase 11 homolog [Source:HGNC Symbol;Acc:HGNC:21080]	6	125986430	126039276	1
ENSG00000142546	0.0743044	5.50347	1.43897	0.164694	0.203663	-7.64872	51070	NOSIP	nitric oxide synthase interacting protein [Source:HGNC Symbol;Acc:HGNC:17946]	19	49555711	49590262	-1
ENSG00000117481	0.0668316	5.45252	1.43737	0.165145	0.204193	-7.64239	387338	NSUN4	NOP2/Sun RNA methyltransferase family member 4 [Source:HGNC Symbol;Acc:HGNC:31802]	1	46340177	46365152	1
ENSG00000131981	0.195741	1.58941	1.4371	0.16522	0.204272	-6.64117	3958	LGALS3	galectin 3 [Source:HGNC Symbol;Acc:HGNC:6563]	14	55124110	55145413	1
ENSG00000132661	0.0895612	4.39333	1.43682	0.1653	0.204342	-7.4221	29107	NXT1	nuclear transport factor 2 like export factor 1 [Source:HGNC Symbol;Acc:HGNC:15913]	20	23350736	23354777	1
ENSG00000135473	0.0749735	4.50854	1.4361	0.165503	0.204542	-7.45065	9924	PAN2	PAN2 poly(A) specific ribonuclease subunit [Source:HGNC Symbol;Acc:HGNC:20074]	12	56316223	56334053	-1
ENSG00000184209	-0.0756931	4.38578	-1.43479	0.16587	0.204969	-7.4189	11066	SNRNP35	small nuclear ribonucleoprotein U11/U12 subunit 35 [Source:HGNC Symbol;Acc:HGNC:30852]	12	123457641	123473154	1
ENSG00000132424	0.06075	7.55589	1.43247	0.166527	0.205768	-7.85031	25957	PNISR	PNN interacting serine and arginine rich protein [Source:HGNC Symbol;Acc:HGNC:21222]	6	99398051	99425331	-1
ENSG00000110107	-0.0732023	6.90882	-1.43199	0.166662	0.205907	-7.81012	27339	PRPF19	pre-mRNA processing factor 19 [Source:HGNC Symbol;Acc:HGNC:17896]	11	60890730	60906588	-1
ENSG00000141456	-0.0811548	5.27781	-1.4241	0.168905	0.208463	-7.62682	27043	PELP1	proline, glutamate and leucine rich protein 1 [Source:HGNC Symbol;Acc:HGNC:30134]	17	4669774	4704337	-1
ENSG00000102898	-0.0561032	6.8263	-1.41965	0.170184	0.20989	-7.82139	10204	NUTF2	nuclear transport factor 2 [Source:HGNC Symbol;Acc:HGNC:13722]	16	67846732	67872567	1
ENSG00000148824	-0.0631693	5.38552	-1.4132	0.172048	0.212038	-7.66136	92170	MTG1	mitochondrial ribosome associated GTPase 1 [Source:HGNC Symbol;Acc:HGNC:32159]	10	133394094	133421307	1
ENSG00000113272	-0.0711696	4.67578	-1.40707	0.173835	0.213934	-7.52559	54974	THG1L	tRNA-histidine guanylyltransferase 1 like [Source:HGNC Symbol;Acc:HGNC:26053]	5	157731197	157741448	1
ENSG00000122870	0.162195	1.61015	1.40654	0.173991	0.21407	-6.6877	80114	BICC1	BicC family RNA binding protein 1 [Source:HGNC Symbol;Acc:HGNC:19351]	10	58513140	58831437	1
ENSG00000163510	0.0847718	5.60907	1.40574	0.174224	0.214329	-7.71096	57703	CWC22	CWC22 homolog, spliceosome-associated protein [Source:HGNC Symbol;Acc:HGNC:29322]	2	179944876	180007113	-1
ENSG00000047410	0.097852	8.64491	1.40374	0.174811	0.214968	-7.94839	7175	TPR	translocated promoter region, nuclear basket protein [Source:HGNC Symbol;Acc:HGNC:12017]	1	186311652	186375693	-1
ENSG00000116350	0.0579872	6.9458	1.40167	0.175422	0.215623	-7.85459	6429	SRSF4	serine and arginine rich splicing factor 4 [Source:HGNC Symbol;Acc:HGNC:10786]	1	29147743	29181987	-1
ENSG00000143319	0.0637873	5.24719	1.39972	0.175996	0.216243	-7.65702	81875	ISG20L2	interferon stimulated exonuclease gene 20 like 2 [Source:HGNC Symbol;Acc:HGNC:25745]	1	156721891	156728799	-1
ENSG00000115128	0.0595514	5.71305	1.39679	0.176864	0.217239	-7.73828	51639	SF3B6	splicing factor 3b subunit 6 [Source:HGNC Symbol;Acc:HGNC:30096]	2	24067584	24076443	-1
ENSG00000147649	-0.0529083	7.40185	-1.39135	0.178486	0.219104	-7.89617	92140	MTDH	metadherin [Source:HGNC Symbol;Acc:HGNC:29608]	8	97644179	97728770	1
ENSG00000180228	0.0489811	6.39661	1.38257	0.181124	0.222055	-7.83775	8575	PRKRA	protein activator of interferon induced protein kinase EIF2AK2 [Source:HGNC Symbol;Acc:HGNC:9438]	2	178431414	178451512	-1
ENSG00000172239	0.063307	5.32569	1.37963	0.182015	0.223047	-7.69817	10605	PAIP1	poly(A) binding protein interacting protein 1 [Source:HGNC Symbol;Acc:HGNC:16945]	5	43526267	43557758	-1
ENSG00000100890	0.0556804	6.0729	1.37451	0.183577	0.224815	-7.81484	9692	KIAA0391	KIAA0391 [Source:HGNC Symbol;Acc:HGNC:19958]	14	35121846	35277614	1
ENSG00000204569	0.0504248	6.34857	1.36868	0.185366	0.226831	-7.85163	5514	PPP1R10	protein phosphatase 1 regulatory subunit 10 [Source:HGNC Symbol;Acc:HGNC:9284]	6	30600400	30618612	-1
ENSG00000083896	0.0521871	6.79708	1.36062	0.187861	0.229558	-7.89887	91746	YTHDC1	YTH domain containing 1 [Source:HGNC Symbol;Acc:HGNC:30626]	4	68310387	68350089	-1
ENSG00000156990	0.0639939	4.61844	1.35138	0.190755	0.232765	-7.58964	285367	RPUSD3	RNA pseudouridylate synthase domain containing 3 [Source:HGNC Symbol;Acc:HGNC:28437]	3	9837849	9844602	-1
ENSG00000102921	0.0540633	5.38847	1.34624	0.19238	0.234672	-7.7528	9683	N4BP1	NEDD4 binding protein 1 [Source:HGNC Symbol;Acc:HGNC:29850]	16	48538726	48620148	-1
ENSG00000104626	0.0660099	5.48601	1.33796	0.195024	0.237485	-7.78037	90459	ERI1	exoribonuclease 1 [Source:HGNC Symbol;Acc:HGNC:23994]	8	9002147	9116746	1
ENSG00000120158	0.087154	4.13127	1.32853	0.198066	0.240865	-7.50013	10171	RCL1	RNA terminal phosphate cyclase like 1 [Source:HGNC Symbol;Acc:HGNC:17687]	9	4792869	4885917	1
ENSG00000196396	0.0527177	6.48674	1.32838	0.198115	0.240894	-7.91667	5770	PTPN1	protein tyrosine phosphatase, non-receptor type 1 [Source:HGNC Symbol;Acc:HGNC:9642]	20	50510321	50585241	1
ENSG00000156976	0.0457683	8.47633	1.3061	0.205449	0.249078	-8.06723	1974 100302143	EIF4A2	eukaryotic translation initiation factor 4A2 [Source:HGNC Symbol;Acc:HGNC:3284]	3	186783205	186789900	1
ENSG00000152404	0.0755292	4.76162	1.30507	0.205796	0.249467	-7.68178	143884	CWF19L2	CWF19-like 2, cell cycle control (S. pombe) [Source:HGNC Symbol;Acc:HGNC:26508]	11	107326345	107457844	-1
ENSG00000109111	0.0425459	7.44274	1.28797	0.211575	0.255916	-8.03282	6830	SUPT6H	SPT6 homolog, histone chaperone [Source:HGNC Symbol;Acc:HGNC:11470]	17	28662091	28702684	1
ENSG00000104824	-0.0519566	8.10519	-1.28511	0.212555	0.256954	-8.07347	3191	HNRNPL	heterogeneous nuclear ribonucleoprotein L [Source:HGNC Symbol;Acc:HGNC:5045]	19	38836388	38852347	-1
ENSG00000182768	0.0471069	7.36604	1.28307	0.213257	0.25774	-8.03443	51335	NGRN	neugrin, neurite outgrowth associated [Source:HGNC Symbol;Acc:HGNC:18077]	15	90265659	90278141	1
ENSG00000132740	0.078267	4.13569	1.28217	0.213567	0.258045	-7.5597	3508	IGHMBP2	immunoglobulin mu binding protein 2 [Source:HGNC Symbol;Acc:HGNC:5542]	11	68903842	68940602	1
ENSG00000102531	0.0454881	7.54835	1.28062	0.214099	0.258606	-8.0482	22862	FNDC3A	fibronectin type III domain containing 3A [Source:HGNC Symbol;Acc:HGNC:20296]	13	48975912	49209779	1
ENSG00000137876	0.0550812	6.6717	1.27809	0.214972	0.259562	-7.99515	51187	RSL24D1	ribosomal L24 domain containing 1 [Source:HGNC Symbol;Acc:HGNC:18479]	15	55180806	55197067	-1
ENSG00000175324	0.0671393	4.77666	1.27624	0.215615	0.260287	-7.72104	27257	LSM1	LSM1 homolog, mRNA degradation associated [Source:HGNC Symbol;Acc:HGNC:20472]	8	38163321	38176730	-1
ENSG00000162910	-0.068662	4.35719	-1.26876	0.218221	0.263049	-7.62815	128308	MRPL55	mitochondrial ribosomal protein L55 [Source:HGNC Symbol;Acc:HGNC:16686]	1	228106679	228109312	-1
ENSG00000145354	-0.0602039	5.12948	-1.26817	0.218428	0.263282	-7.80159	493856	CISD2	CDGSH iron sulfur domain 2 [Source:HGNC Symbol;Acc:HGNC:24212]	4	102868978	102889242	1
ENSG00000262814	-0.084734	4.91773	-1.26727	0.218742	0.263627	-7.75898	6182	MRPL12	mitochondrial ribosomal protein L12 [Source:HGNC Symbol;Acc:HGNC:10378]	17	81703357	81707526	1
ENSG00000243147	0.0720004	4.80695	1.26166	0.220716	0.265735	-7.74577	9553	MRPL33	mitochondrial ribosomal protein L33 [Source:HGNC Symbol;Acc:HGNC:14487]	2	27771717	27988087	1
ENSG00000033030	-0.0556353	5.26204	-1.25615	0.222667	0.267815	-7.84178	55596	ZCCHC8	zinc finger CCHC-type containing 8 [Source:HGNC Symbol;Acc:HGNC:25265]	12	122471600	122501073	-1
ENSG00000085719	0.0548596	6.81026	1.2526	0.223931	0.269231	-8.03656	8895	CPNE3	copine 3 [Source:HGNC Symbol;Acc:HGNC:2316]	8	86514427	86561498	1
ENSG00000160208	0.051477	7.21896	1.22413	0.234274	0.280493	-8.09757	23076	RRP1B	ribosomal RNA processing 1B [Source:HGNC Symbol;Acc:HGNC:23818]	21	43659548	43696079	1
ENSG00000155506	0.0458597	7.87829	1.21073	0.239265	0.28609	-8.15197	23367	LARP1	La ribonucleoprotein domain family member 1 [Source:HGNC Symbol;Acc:HGNC:29531]	5	154712902	154817607	1
ENSG00000048162	0.0649169	5.37377	1.20839	0.240145	0.286988	-7.92161	51491	NOP16	NOP16 nucleolar protein [Source:HGNC Symbol;Acc:HGNC:26934]	5	176383938	176388975	-1
ENSG00000108064	0.058751	6.46502	1.19855	0.24387	0.290881	-8.07449	7019	TFAM	transcription factor A, mitochondrial [Source:HGNC Symbol;Acc:HGNC:11741]	10	58385022	58399221	1
ENSG00000180992	-0.0703118	5.0863	-1.18904	0.247515	0.294859	-7.88792	64928	MRPL14	mitochondrial ribosomal protein L14 [Source:HGNC Symbol;Acc:HGNC:14279]	6	44113454	44127457	-1
ENSG00000100813	-0.0358453	8.09912	-1.18409	0.249426	0.296855	-8.19505	22985	ACIN1	apoptotic chromatin condensation inducer 1 [Source:HGNC Symbol;Acc:HGNC:17066]	14	23058564	23095614	-1
ENSG00000196365	-0.0525153	6.44469	-1.16844	0.255544	0.30328	-8.10664	9361	LONP1	lon peptidase 1, mitochondrial [Source:HGNC Symbol;Acc:HGNC:9479]	19	5691834	5720572	-1
ENSG00000111786	0.0454723	7.79137	1.16541	0.256739	0.304547	-8.19992	8683	SRSF9	serine and arginine rich splicing factor 9 [Source:HGNC Symbol;Acc:HGNC:10791]	12	120461668	120469793	-1
ENSG00000167962	-0.0739631	5.00344	-1.16498	0.256911	0.304732	-7.89875	90850	ZNF598	zinc finger protein 598 [Source:HGNC Symbol;Acc:HGNC:28079]	16	1997654	2009823	-1
ENSG00000169288	-0.0616369	5.29153	-1.16189	0.258139	0.306016	-7.95856	65008	MRPL1	mitochondrial ribosomal protein L1 [Source:HGNC Symbol;Acc:HGNC:14275]	4	77862520	77952790	1
ENSG00000113141	0.0467362	5.8354	1.15798	0.259693	0.307704	-8.05179	3550 100500820	IK	IK cytokine, down-regulator of HLA II [Source:HGNC Symbol;Acc:HGNC:5958]	5	140647058	140662479	1
ENSG00000205571	0.13901	1.72073	1.15684	0.260149	0.308187	-7.02945	6606 6607	SMN2	survival of motor neuron 2, centromeric [Source:HGNC Symbol;Acc:HGNC:11118]	5	70049612	70078522	1
ENSG00000108424	-0.0418819	9.69316	-1.12732	0.272148	0.321438	-8.33206	3837	KPNB1	karyopherin subunit beta 1 [Source:HGNC Symbol;Acc:HGNC:6400]	17	47649476	47685505	1
ENSG00000011304	-0.0592574	8.5103	-1.12216	0.274286	0.323743	-8.28701	5725 100616459	PTBP1	polypyrimidine tract binding protein 1 [Source:HGNC Symbol;Acc:HGNC:9583]	19	797075	812327	1
ENSG00000164163	0.0674573	7.74857	1.11628	0.276738	0.326352	-8.25291	6059	ABCE1	ATP binding cassette subfamily E member 1 [Source:HGNC Symbol;Acc:HGNC:69]	4	145097932	145129179	1
ENSG00000184110	0.126997	1.92923	1.11591	0.276894	0.326475	-7.13621	8663 728689	EIF3C	eukaryotic translation initiation factor 3 subunit C [Source:HGNC Symbol;Acc:HGNC:3279]	16	28688558	28735730	1
ENSG00000181222	-0.070379	5.07786	-1.11241	0.278363	0.327974	-7.97307	5430	POLR2A	RNA polymerase II subunit A [Source:HGNC Symbol;Acc:HGNC:9187]	17	7484366	7514616	1
ENSG00000175573	-0.0669479	4.04058	-1.10826	0.280108	0.329794	-7.73477	83638	C11orf68	chromosome 11 open reading frame 68 [Source:HGNC Symbol;Acc:HGNC:28801]	11	65916808	65919117	-1
ENSG00000068784	-0.0544058	5.74451	-1.10715	0.280579	0.330307	-8.09432	55133	SRBD1	S1 RNA binding domain 1 [Source:HGNC Symbol;Acc:HGNC:25521]	2	45388680	45612165	-1
ENSG00000112941	0.0544873	5.06194	1.1008	0.283269	0.333081	-7.98527	11044	PAPD7	poly(A) RNA polymerase D7, non-canonical [Source:HGNC Symbol;Acc:HGNC:16705]	5	6713007	6757048	1
ENSG00000168883	-0.044753	6.57905	-1.09586	0.28538	0.335273	-8.1993	10713	USP39	ubiquitin specific peptidase 39 [Source:HGNC Symbol;Acc:HGNC:20071]	2	85602856	85649282	1
ENSG00000085872	-0.0675823	4.16307	-1.09322	0.286512	0.336414	-7.78286	10523	CHERP	calcium homeostasis endoplasmic reticulum protein [Source:HGNC Symbol;Acc:HGNC:16930]	19	16517889	16542530	-1
ENSG00000138442	0.0504521	5.82372	1.09094	0.28749	0.337427	-8.12476	55759	WDR12	WD repeat domain 12 [Source:HGNC Symbol;Acc:HGNC:14098]	2	202874782	203014798	-1
ENSG00000115866	-0.0455638	6.46794	-1.07947	0.292455	0.342587	-8.20758	1615	DARS	aspartyl-tRNA synthetase [Source:HGNC Symbol;Acc:HGNC:2678]	2	135906677	135986100	-1
ENSG00000142544	-0.145506	0.80096	-1.07086	0.29622	0.34657	-6.85357	90353	CTU1	cytosolic thiouridylase subunit 1 [Source:HGNC Symbol;Acc:HGNC:29590]	19	51097606	51108370	-1
ENSG00000113013	0.0523244	8.62393	1.06775	0.29759	0.347958	-8.35225	3313	HSPA9	heat shock protein family A (Hsp70) member 9 [Source:HGNC Symbol;Acc:HGNC:5244]	5	138554882	138575444	-1
ENSG00000117395	-0.0800774	5.83807	-1.06456	0.298996	0.349322	-8.15282	10969 102465439	EBNA1BP2	EBNA1 binding protein 2 [Source:HGNC Symbol;Acc:HGNC:15531]	1	43164175	43270936	-1
ENSG00000132313	-0.0486989	5.98076	-1.05978	0.301117	0.351498	-8.17695	51318	MRPL35	mitochondrial ribosomal protein L35 [Source:HGNC Symbol;Acc:HGNC:14489]	2	86199355	86213794	1
ENSG00000096063	-0.0488123	7.49744	-1.05926	0.301348	0.351745	-8.29928	6732	SRPK1	SRSF protein kinase 1 [Source:HGNC Symbol;Acc:HGNC:11305]	6	35832966	35921342	-1
ENSG00000157106	0.037519	7.02579	1.0583	0.301774	0.3522	-8.27196	23049	SMG1	SMG1, nonsense mediated mRNA decay associated PI3K related kinase [Source:HGNC Symbol;Acc:HGNC:30045]	16	18804853	18926454	-1
ENSG00000065243	-0.0428287	6.81624	-1.02894	0.315054	0.3661	-8.28786	5586	PKN2	protein kinase N2 [Source:HGNC Symbol;Acc:HGNC:9406]	1	88684222	88836255	1
ENSG00000130254	0.0549637	5.71805	1.02508	0.316828	0.367936	-8.1791	9667	SAFB2	scaffold attachment factor B2 [Source:HGNC Symbol;Acc:HGNC:21605]	19	5586999	5624046	-1
ENSG00000204822	0.06126	4.30688	1.01685	0.320639	0.371929	-7.90278	116540	MRPL53	mitochondrial ribosomal protein L53 [Source:HGNC Symbol;Acc:HGNC:16684]	2	74471958	74473322	-1
ENSG00000070047	0.0580131	6.35155	1.01534	0.321341	0.372608	-8.26475	57661	PHRF1	PHD and ring finger domains 1 [Source:HGNC Symbol;Acc:HGNC:24351]	11	576486	612222	1
ENSG00000110958	-0.0443848	7.74716	-0.994517	0.331138	0.383031	-8.38003	10728	PTGES3	prostaglandin E synthase 3 [Source:HGNC Symbol;Acc:HGNC:16049]	12	56663341	56688408	-1
ENSG00000153015	0.0494588	5.39603	0.992196	0.332243	0.384192	-8.16072	10283	CWC27	CWC27 spliceosome associated protein homolog [Source:HGNC Symbol;Acc:HGNC:10664]	5	64768930	65018763	1
ENSG00000197345	0.0529766	4.63431	0.988461	0.334025	0.385924	-8.00999	219927	MRPL21	mitochondrial ribosomal protein L21 [Source:HGNC Symbol;Acc:HGNC:14479]	11	68891276	68903835	-1
ENSG00000163412	0.0957448	2.87287	0.983846	0.336237	0.38829	-7.54735	317649	EIF4E3	eukaryotic translation initiation factor 4E family member 3 [Source:HGNC Symbol;Acc:HGNC:31837]	3	71675416	71754773	-1
ENSG00000007520	-0.0568425	4.562	-0.980877	0.337666	0.389679	-7.99779	115939	TSR3	TSR3, acp transferase ribosome maturation factor [Source:HGNC Symbol;Acc:HGNC:14175]	16	1349240	1351911	-1
ENSG00000174547	-0.0421915	5.66928	-0.979426	0.338366	0.390308	-8.21596	65003	MRPL11	mitochondrial ribosomal protein L11 [Source:HGNC Symbol;Acc:HGNC:14042]	11	66435075	66466738	-1
ENSG00000100038	0.0452656	4.97388	0.978893	0.338623	0.390546	-8.09344	8940	TOP3B	topoisomerase (DNA) III beta [Source:HGNC Symbol;Acc:HGNC:11993]	22	21957025	21982816	-1
ENSG00000247596	-0.0557364	4.83587	-0.976412	0.339822	0.391787	-8.06424	11344	TWF2	twinfilin actin binding protein 2 [Source:HGNC Symbol;Acc:HGNC:9621]	3	52228610	52239260	-1
ENSG00000100883	0.0437436	6.11316	0.973774	0.341101	0.393141	-8.2811	6729	SRP54	signal recognition particle 54 [Source:HGNC Symbol;Acc:HGNC:11301]	14	34981957	35029567	1
ENSG00000159352	0.0424034	6.32949	0.966372	0.344705	0.396886	-8.31103	5710	PSMD4	proteasome 26S subunit, non-ATPase 4 [Source:HGNC Symbol;Acc:HGNC:9561]	1	151254703	151267479	1
ENSG00000139675	0.0676116	3.29644	0.960387	0.347639	0.399918	-7.68925	144983	HNRNPA1L2	heterogeneous nuclear ribonucleoprotein A1-like 2 [Source:HGNC Symbol;Acc:HGNC:27067]	13	52640786	52643796	1
ENSG00000141543	-0.040412	6.87823	-0.95746	0.349079	0.401435	-8.36316	9775	EIF4A3	eukaryotic translation initiation factor 4A3 [Source:HGNC Symbol;Acc:HGNC:18683]	17	80135214	80147183	-1
ENSG00000065427	-0.0368176	7.62361	-0.948678	0.353427	0.406065	-8.41764	3735	KARS	lysyl-tRNA synthetase [Source:HGNC Symbol;Acc:HGNC:6215]	16	75627474	75648643	-1
ENSG00000131914	0.0373662	9.30236	0.947768	0.353879	0.406511	-8.50284	79727	LIN28A	lin-28 homolog A [Source:HGNC Symbol;Acc:HGNC:15986]	1	26410778	26429722	1
ENSG00000166889	0.0458355	4.71289	0.942241	0.356636	0.409381	-8.07242	219988	PATL1	PAT1 homolog 1, processing body mRNA decay factor [Source:HGNC Symbol;Acc:HGNC:26721]	11	59636716	59668980	-1
ENSG00000116030	0.0451676	6.57969	0.941645	0.356935	0.409699	-8.35691	7341	SUMO1	small ubiquitin-like modifier 1 [Source:HGNC Symbol;Acc:HGNC:12502]	2	202206180	202238608	-1
ENSG00000103353	0.0378486	6.98903	0.937995	0.358764	0.411445	-8.38963	56061	UBFD1	ubiquitin family domain containing 1 [Source:HGNC Symbol;Acc:HGNC:30565]	16	23557362	23574389	1
ENSG00000198918	0.0928557	2.60256	0.93751	0.359008	0.411655	-7.51469	6170	RPL39	ribosomal protein L39 [Source:HGNC Symbol;Acc:HGNC:10350]	X	119786504	119791643	-1
ENSG00000132382	-0.0727834	5.70515	-0.931632	0.361969	0.41475	-8.26668	10514	MYBBP1A	MYB binding protein 1a [Source:HGNC Symbol;Acc:HGNC:7546]	17	4538897	4555631	-1
ENSG00000139718	0.0973779	2.63217	0.928969	0.363316	0.415917	-7.53123	23067	SETD1B	SET domain containing 1B [Source:HGNC Symbol;Acc:HGNC:29187]	12	121804180	121832584	1
ENSG00000105618	-0.0413933	6.31923	-0.92104	0.367346	0.420088	-8.35205	26121	PRPF31	pre-mRNA processing factor 31 [Source:HGNC Symbol;Acc:HGNC:15446]	19	54115410	54131719	1
ENSG00000111639	-0.0362117	6.68336	-0.912557	0.371691	0.424531	-8.39142	51258	MRPL51	mitochondrial ribosomal protein L51 [Source:HGNC Symbol;Acc:HGNC:14044]	12	6491886	6493841	-1
ENSG00000083544	-0.0470816	5.05951	-0.909606	0.373211	0.42619	-8.17468	81550	TDRD3	tudor domain containing 3 [Source:HGNC Symbol;Acc:HGNC:20612]	13	60396457	60573878	1
ENSG00000171960	0.0631576	3.75198	0.902005	0.377143	0.430111	-7.86865	10465	PPIH	peptidylprolyl isomerase H [Source:HGNC Symbol;Acc:HGNC:14651]	1	42658425	42676758	1
ENSG00000204560	-0.0333354	5.9758	-0.900097	0.378135	0.431008	-8.33324	8449	DHX16	DEAH-box helicase 16 [Source:HGNC Symbol;Acc:HGNC:2739]	6	30653119	30673037	-1
ENSG00000166949	0.0477969	5.80466	0.879666	0.388859	0.441667	-8.33037	4088	SMAD3	SMAD family member 3 [Source:HGNC Symbol;Acc:HGNC:6769]	15	67063763	67195195	1
ENSG00000172590	0.0405378	5.02663	0.870008	0.393997	0.447048	-8.2054	122704	MRPL52	mitochondrial ribosomal protein L52 [Source:HGNC Symbol;Acc:HGNC:16655]	14	22829879	22835037	1
ENSG00000160201	0.0939244	2.34671	0.858096	0.400394	0.453466	-7.51259	7307 102724594	U2AF1	U2 small nuclear RNA auxiliary factor 1 [Source:HGNC Symbol;Acc:HGNC:12453]	21	43092956	43107587	-1
ENSG00000177885	0.033351	6.60555	0.85288	0.403216	0.456308	-8.43919	2885	GRB2	growth factor receptor bound protein 2 [Source:HGNC Symbol;Acc:HGNC:4566]	17	75318076	75405709	-1
ENSG00000269955	-0.0316268	6.77154	-0.830167	0.415654	0.468596	-8.47056	100996928	C7orf55-LUC7L2	C7orf55-LUC7L2 readthrough [Source:HGNC Symbol;Acc:HGNC:44671]	7	139341360	139422599	1
ENSG00000005007	0.0420426	5.97068	0.828327	0.416672	0.46959	-8.39637	5976	UPF1	UPF1, RNA helicase and ATPase [Source:HGNC Symbol;Acc:HGNC:9962]	19	18831938	18868236	1
ENSG00000115211	0.0352096	5.50029	0.82678	0.41753	0.470375	-8.32956	8890	EIF2B4	eukaryotic translation initiation factor 2B subunit delta [Source:HGNC Symbol;Acc:HGNC:3260]	2	27364352	27370486	-1
ENSG00000213741	0.0443403	7.05669	0.81987	0.421372	0.474225	-8.49889	6235	RPS29	ribosomal protein S29 [Source:HGNC Symbol;Acc:HGNC:10419]	14	49570984	49599164	-1
ENSG00000086758	0.028888	8.55696	0.815752	0.423672	0.476362	-8.58715	10075	HUWE1	HECT, UBA and WWE domain containing 1, E3 ubiquitin protein ligase [Source:HGNC Symbol;Acc:HGNC:30892]	X	53532096	53686729	-1
ENSG00000146963	-0.0311905	7.08796	-0.805462	0.429455	0.482093	-8.51231	51631	LUC7L2	LUC7 like 2, pre-mRNA splicing factor [Source:HGNC Symbol;Acc:HGNC:21608]	7	139340359	139423457	1
ENSG00000131876	0.0621077	3.29578	0.80109	0.431927	0.484609	-7.83038	6627	SNRPA1	small nuclear ribonucleoprotein polypeptide A' [Source:HGNC Symbol;Acc:HGNC:11152]	15	101281510	101295282	-1
ENSG00000161016	0.0351838	9.06786	0.795397	0.435159	0.487658	-8.6274	6132 102465978	RPL8	ribosomal protein L8 [Source:HGNC Symbol;Acc:HGNC:10368]	8	144789765	144792587	-1
ENSG00000136942	0.0420235	7.80821	0.790228	0.438106	0.490614	-8.56783	11224	RPL35	ribosomal protein L35 [Source:HGNC Symbol;Acc:HGNC:10344]	9	124857880	124861981	-1
ENSG00000102103	-0.0378427	5.10385	-0.785384	0.440879	0.493311	-8.29024	10084	PQBP1	polyglutamine binding protein 1 [Source:HGNC Symbol;Acc:HGNC:9330]	X	48897912	48903143	1
ENSG00000144535	-0.0356141	4.88815	-0.781878	0.442893	0.495273	-8.24879	129563	DIS3L2	DIS3 like 3'-5' exoribonuclease 2 [Source:HGNC Symbol;Acc:HGNC:28648]	2	231961245	232344350	1
ENSG00000179912	-0.0458807	4.00457	-0.777463	0.445437	0.497883	-8.03885	22864	R3HDM2	R3H domain containing 2 [Source:HGNC Symbol;Acc:HGNC:29167]	12	57253762	57431005	-1
ENSG00000101361	-0.0364024	7.88026	-0.772379	0.448377	0.500993	-8.58565	10528 100302138	NOP56	NOP56 ribonucleoprotein [Source:HGNC Symbol;Acc:HGNC:15911]	20	2652145	2658393	1
ENSG00000171421	0.0497214	4.24288	0.769671	0.449948	0.50257	-8.10901	64979	MRPL36	mitochondrial ribosomal protein L36 [Source:HGNC Symbol;Acc:HGNC:14490]	5	1798386	1801366	-1
ENSG00000105258	-0.0372544	4.42689	-0.769501	0.450047	0.502651	-8.15258	5438	POLR2I	RNA polymerase II subunit I [Source:HGNC Symbol;Acc:HGNC:9196]	19	36113710	36115346	-1
ENSG00000143294	0.0377909	5.28755	0.768697	0.450514	0.503114	-8.33985	5546	PRCC	papillary renal cell carcinoma (translocation-associated) [Source:HGNC Symbol;Acc:HGNC:9343]	1	156750610	156800817	1
ENSG00000196235	0.0274483	6.44385	0.765566	0.452336	0.504881	-8.49729	6829	SUPT5H	SPT5 homolog, DSIF elongation factor subunit [Source:HGNC Symbol;Acc:HGNC:11469]	19	39436156	39476670	1
ENSG00000161654	-0.0672055	2.90202	-0.764948	0.452697	0.505224	-7.74429	124801	LSM12	LSM12 homolog [Source:HGNC Symbol;Acc:HGNC:26407]	17	44034635	44067619	-1
ENSG00000117419	0.0315016	5.76042	0.757881	0.456828	0.509295	-8.42505	79033	ERI3	ERI1 exoribonuclease family member 3 [Source:HGNC Symbol;Acc:HGNC:17276]	1	44221070	44355260	-1
ENSG00000175376	0.0444238	4.76712	0.753765	0.459244	0.511688	-8.24628	84285	EIF1AD	eukaryotic translation initiation factor 1A domain containing [Source:HGNC Symbol;Acc:HGNC:28147]	11	65996545	66002176	-1
ENSG00000162927	-0.0628448	2.88684	-0.752571	0.459946	0.51232	-7.74944	150962	PUS10	pseudouridylate synthase 10 [Source:HGNC Symbol;Acc:HGNC:26505]	2	60940222	61018259	-1
ENSG00000029639	0.05835	3.33421	0.748128	0.462566	0.514966	-7.88282	51106	TFB1M	transcription factor B1, mitochondrial [Source:HGNC Symbol;Acc:HGNC:17037]	6	155257509	155314493	-1
ENSG00000270647	0.0411653	5.19127	0.747384	0.463005	0.515394	-8.33846	8148	TAF15	TATA-box binding protein associated factor 15 [Source:HGNC Symbol;Acc:HGNC:11547]	17	35713791	35864615	1
ENSG00000107223	-0.0264327	6.95412	-0.739478	0.467691	0.519818	-8.55556	8721	EDF1	endothelial differentiation related factor 1 [Source:HGNC Symbol;Acc:HGNC:3164]	9	136862119	136866286	-1
ENSG00000147679	0.0358971	5.16161	0.738909	0.468029	0.520163	-8.33914	84294	UTP23	UTP23, small subunit processome component [Source:HGNC Symbol;Acc:HGNC:28224]	8	116766503	116849463	1
ENSG00000184898	-0.0735423	2.52802	-0.736955	0.469191	0.521272	-7.65802	375287	RBM43	RNA binding motif protein 43 [Source:HGNC Symbol;Acc:HGNC:24790]	2	151247940	151261879	-1
ENSG00000140718	-0.0331243	5.98563	-0.735864	0.469842	0.521872	-8.47074	79068	FTO	fat mass and obesity associated [Source:HGNC Symbol;Acc:HGNC:24678]	16	53701692	54158512	1
ENSG00000048828	-0.0316255	6.52081	-0.733243	0.471406	0.523303	-8.52808	23196	FAM120A	family with sequence similarity 120A [Source:HGNC Symbol;Acc:HGNC:13247]	9	93451722	93566107	1
ENSG00000078687	0.0365447	4.97494	0.732648	0.471761	0.523575	-8.30659	57690	TNRC6C	trinucleotide repeat containing 6C [Source:HGNC Symbol;Acc:HGNC:29318]	17	77959240	78108835	1
ENSG00000130305	0.0435896	4.20236	0.725259	0.476188	0.527901	-8.13244	55695	NSUN5	NOP2/Sun RNA methyltransferase family member 5 [Source:HGNC Symbol;Acc:HGNC:16385]	7	73302517	73308867	-1
ENSG00000139546	-0.0313161	5.56523	-0.720699	0.478932	0.530572	-8.42254	6895	TARBP2	TARBP2, RISC loading complex RNA binding subunit [Source:HGNC Symbol;Acc:HGNC:11569]	12	53500921	53506431	1
ENSG00000147403	-0.0317025	6.13681	-0.717277	0.480997	0.532549	-8.50232	6134	RPL10	ribosomal protein L10 [Source:HGNC Symbol;Acc:HGNC:10298]	X	154389955	154409168	1
ENSG00000112651	-0.0439774	3.82454	-0.706209	0.487713	0.539167	-8.04491	51069	MRPL2	mitochondrial ribosomal protein L2 [Source:HGNC Symbol;Acc:HGNC:14056]	6	43054029	43059806	-1
ENSG00000125755	-0.026333	6.21974	-0.700108	0.491438	0.542842	-8.5238	8189	SYMPK	symplekin [Source:HGNC Symbol;Acc:HGNC:22935]	19	45815410	45863290	-1
ENSG00000163214	0.027403	6.04534	0.69653	0.49363	0.545104	-8.50756	90957	DHX57	DEAH-box helicase 57 [Source:HGNC Symbol;Acc:HGNC:20086]	2	38797729	38875934	-1
ENSG00000130520	-0.0243903	7.08476	-0.692546	0.496078	0.547578	-8.59838	25804	LSM4	LSM4 homolog, U6 small nuclear RNA and mRNA degradation associated [Source:HGNC Symbol;Acc:HGNC:17259]	19	18306230	18323274	-1
ENSG00000100138	0.0364336	6.24328	0.68997	0.497664	0.548984	-8.53419	4809	SNU13	SNU13 homolog, small nuclear ribonucleoprotein (U4/U6.U5) [Source:HGNC Symbol;Acc:HGNC:7819]	22	41673930	41690504	-1
ENSG00000187772	-0.0293005	8.27157	-0.687859	0.498966	0.55026	-8.67014	389421	LIN28B	lin-28 homolog B [Source:HGNC Symbol;Acc:HGNC:32207]	6	104936616	105083332	1
ENSG00000139726	-0.0315601	6.76635	-0.686053	0.500081	0.551266	-8.58151	8562	DENR	density regulated re-initiation and release factor [Source:HGNC Symbol;Acc:HGNC:2769]	12	122752774	122771064	1
ENSG00000181019	0.0465462	7.38984	0.681669	0.502795	0.553807	-8.62519	1728	NQO1	NAD(P)H quinone dehydrogenase 1 [Source:HGNC Symbol;Acc:HGNC:2874]	16	69706996	69726951	-1
ENSG00000148187	0.0295429	4.98367	0.675069	0.506896	0.557968	-8.34965	92399	MRRF	mitochondrial ribosome recycling factor [Source:HGNC Symbol;Acc:HGNC:7234]	9	122264603	122331343	1
ENSG00000154719	0.0351447	4.79865	0.673773	0.507703	0.558727	-8.31144	54148	MRPL39	mitochondrial ribosomal protein L39 [Source:HGNC Symbol;Acc:HGNC:14027]	21	25585656	25607517	-1
ENSG00000139343	0.0331104	5.14925	0.672732	0.508352	0.559344	-8.38439	6636	SNRPF	small nuclear ribonucleoprotein polypeptide F [Source:HGNC Symbol;Acc:HGNC:11162]	12	95858928	95903828	1
ENSG00000116750	-0.0339511	5.93935	-0.668384	0.511069	0.561844	-8.51352	51377	UCHL5	ubiquitin C-terminal hydrolase L5 [Source:HGNC Symbol;Acc:HGNC:19678]	1	193012250	193060080	-1
ENSG00000147586	-0.0415674	4.42964	-0.664114	0.513744	0.564262	-8.23022	28957	MRPS28	mitochondrial ribosomal protein S28 [Source:HGNC Symbol;Acc:HGNC:14513]	8	79918717	80030289	-1
ENSG00000211460	0.026338	8.07136	0.649593	0.522901	0.573176	-8.68583	7247	TSN	translin [Source:HGNC Symbol;Acc:HGNC:12379]	2	121737103	121767853	1
ENSG00000232119	-0.0380467	4.9325	-0.641004	0.528358	0.578439	-8.36059	28985	MCTS1	MCTS1, re-initiation and release factor [Source:HGNC Symbol;Acc:HGNC:23357]	X	120594010	120621074	1
ENSG00000242372	0.0290447	6.31855	0.639852	0.529093	0.579109	-8.57591	3692	EIF6	eukaryotic translation initiation factor 6 [Source:HGNC Symbol;Acc:HGNC:6159]	20	35278907	35284985	-1
ENSG00000099817	0.0286097	6.6835	0.630377	0.535154	0.585035	-8.61348	5434	POLR2E	RNA polymerase II subunit E [Source:HGNC Symbol;Acc:HGNC:9192]	19	1086579	1095380	-1
ENSG00000105640	0.047937	4.92011	0.625312	0.53841	0.588332	-8.37001	6142	RPL18A	ribosomal protein L18a [Source:HGNC Symbol;Acc:HGNC:10311]	19	17859876	17864153	1
ENSG00000100319	0.0472859	3.61595	0.618583	0.542752	0.592249	-8.05048	55954	ZMAT5	zinc finger matrin-type 5 [Source:HGNC Symbol;Acc:HGNC:28046]	22	29730956	29767011	-1
ENSG00000122026	0.0322921	4.36945	0.614906	0.545132	0.594436	-8.24978	6144	RPL21	ribosomal protein L21 [Source:HGNC Symbol;Acc:HGNC:10313]	13	27251309	27256691	1
ENSG00000151657	0.0421594	4.07152	0.611689	0.547219	0.596369	-8.17673	22944	KIN	Kin17 DNA and RNA binding protein [Source:HGNC Symbol;Acc:HGNC:6327]	10	7750962	7787981	-1
ENSG00000126653	0.0363046	4.94421	0.611175	0.547553	0.596561	-8.38398	84081 494335	NSRP1	nuclear speckle splicing regulatory protein 1 [Source:HGNC Symbol;Acc:HGNC:25305]	17	30115521	30186475	1
ENSG00000189369	0.0272454	5.24205	0.600537	0.554486	0.603285	-8.44917	23708	GSPT2	G1 to S phase transition 2 [Source:HGNC Symbol;Acc:HGNC:4622]	X	51743431	51746232	1
ENSG00000115268	-0.0314573	7.57944	-0.595765	0.557611	0.606267	-8.69222	6209	RPS15	ribosomal protein S15 [Source:HGNC Symbol;Acc:HGNC:10388]	19	1438358	1440494	1
ENSG00000130589	0.0726474	2.59589	0.595184	0.557993	0.606622	-7.77859	85441	HELZ2	helicase with zinc finger 2 [Source:HGNC Symbol;Acc:HGNC:30021]	20	63558086	63574239	-1
ENSG00000126777	-0.0398548	7.76628	-0.576848	0.57009	0.618276	-8.71434	3895	KTN1	kinectin 1 [Source:HGNC Symbol;Acc:HGNC:6467]	14	55559072	55701526	1
ENSG00000107960	0.0375433	3.63375	0.56892	0.575362	0.623139	-8.08548	79991	OBFC1	oligonucleotide/oligosaccharide binding fold containing 1 [Source:HGNC Symbol;Acc:HGNC:26200]	10	103882542	103918205	-1
ENSG00000205609	-0.0423509	3.61637	-0.562688	0.579523	0.62693	-8.08214	728689	EIF3CL	eukaryotic translation initiation factor 3 subunit C-like [Source:HGNC Symbol;Acc:HGNC:26347]	16	28379579	28403879	-1
ENSG00000084072	-0.025484	5.19831	-0.557838	0.582772	0.630122	-8.46529	10450	PPIE	peptidylprolyl isomerase E [Source:HGNC Symbol;Acc:HGNC:9258]	1	39692182	39763914	1
ENSG00000169564	0.0216036	6.36809	0.555386	0.584418	0.63165	-8.63254	5093	PCBP1	poly(rC) binding protein 1 [Source:HGNC Symbol;Acc:HGNC:8647]	2	70087454	70089203	1
ENSG00000104897	0.0368222	4.22455	0.553529	0.585666	0.632746	-8.25056	8175	SF3A2	splicing factor 3a subunit 2 [Source:HGNC Symbol;Acc:HGNC:10766]	19	2236504	2248679	1
ENSG00000120693	-0.0724593	1.22901	-0.552722	0.58621	0.633194	-7.40094	4093	SMAD9	SMAD family member 9 [Source:HGNC Symbol;Acc:HGNC:6774]	13	36844831	36920765	-1
ENSG00000136718	0.0326933	5.65118	0.55062	0.587624	0.634581	-8.54809	92856	IMP4	IMP4 homolog, U3 small nucleolar ribonucleoprotein [Source:HGNC Symbol;Acc:HGNC:30856]	2	130342225	130347810	1
ENSG00000198056	0.0272093	4.94452	0.536768	0.596991	0.643297	-8.42778	5557	PRIM1	primase (DNA) subunit 1 [Source:HGNC Symbol;Acc:HGNC:9369]	12	56731596	56752373	-1
ENSG00000218823	-0.0678631	1.44278	-0.532362	0.599986	0.646084	-7.47355	56903	PAPOLB	poly(A) polymerase beta [Source:HGNC Symbol;Acc:HGNC:15970]	7	4857733	4861994	-1
ENSG00000186666	0.0392032	3.22782	0.53055	0.60122	0.647192	-7.99535	144233	BCDIN3D	BCDIN3 domain containing RNA methyltransferase [Source:HGNC Symbol;Acc:HGNC:27050]	12	49836039	49843129	-1
ENSG00000132792	0.0259309	5.28787	0.528611	0.602541	0.648467	-8.49943	56259	CTNNBL1	catenin beta like 1 [Source:HGNC Symbol;Acc:HGNC:15879]	20	37693955	37872129	1
ENSG00000120688	0.0275194	4.73348	0.520437	0.608128	0.65359	-8.39092	11193	WBP4	WW domain binding protein 4 [Source:HGNC Symbol;Acc:HGNC:12739]	13	41061274	41084006	1
ENSG00000031698	0.0177636	7.53769	0.509495	0.615645	0.660397	-8.73927	6301	SARS	seryl-tRNA synthetase [Source:HGNC Symbol;Acc:HGNC:10537]	1	109213918	109238169	1
ENSG00000076928	0.0344452	4.98435	0.507954	0.616707	0.66135	-8.45168	9138 100505585	ARHGEF1	Rho guanine nucleotide exchange factor 1 [Source:HGNC Symbol;Acc:HGNC:681]	19	41883161	41930150	1
ENSG00000185721	0.0255564	5.66126	0.502013	0.620809	0.665185	-8.57588	4733	DRG1	developmentally regulated GTP binding protein 1 [Source:HGNC Symbol;Acc:HGNC:3029]	22	31399523	31528740	1
ENSG00000147905	-0.0295095	4.19814	-0.498694	0.623107	0.667308	-8.27203	84186	ZCCHC7	zinc finger CCHC-type containing 7 [Source:HGNC Symbol;Acc:HGNC:26209]	9	37120539	37358149	1
ENSG00000143748	0.0198292	5.79192	0.497204	0.62414	0.66823	-8.59733	4931	NVL	nuclear VCP-like [Source:HGNC Symbol;Acc:HGNC:8070]	1	224227334	224330387	-1
ENSG00000108010	0.0240216	6.38078	0.493425	0.626762	0.670693	-8.66734	10539	GLRX3	glutaredoxin 3 [Source:HGNC Symbol;Acc:HGNC:15987]	10	130136399	130184521	1
ENSG00000116698	-0.0200587	5.7847	-0.492823	0.62718	0.671102	-8.59797	9887	SMG7	SMG7, nonsense mediated mRNA decay factor [Source:HGNC Symbol;Acc:HGNC:16792]	1	183472216	183598246	1
ENSG00000122140	-0.0252994	5.59107	-0.491825	0.627875	0.671769	-8.56948	51116	MRPS2	mitochondrial ribosomal protein S2 [Source:HGNC Symbol;Acc:HGNC:14495]	9	135499984	135504673	1
ENSG00000153914	-0.0206556	7.22126	-0.485761	0.632097	0.675678	-8.73236	140890	SREK1	splicing regulatory glutamic acid and lysine rich protein 1 [Source:HGNC Symbol;Acc:HGNC:17882]	5	66139971	66183615	1
ENSG00000137054	0.0278324	6.06095	0.484929	0.632677	0.676146	-8.63807	64425	POLR1E	RNA polymerase I subunit E [Source:HGNC Symbol;Acc:HGNC:17631]	9	37485935	37503697	1
ENSG00000241343	-0.0270148	4.23231	-0.483133	0.633931	0.677448	-8.28869	6173	RPL36A	ribosomal protein L36a [Source:HGNC Symbol;Acc:HGNC:10359]	X	101390824	101396154	1
ENSG00000116539	-0.0175289	6.63248	-0.478466	0.637194	0.68052	-8.69609	55870 693140	ASH1L	ASH1 like histone lysine methyltransferase [Source:HGNC Symbol;Acc:HGNC:19088]	1	155335268	155562807	-1
ENSG00000163541	0.0193922	5.80664	0.475042	0.639593	0.682844	-8.61053	8802	SUCLG1	succinate-CoA ligase alpha subunit [Source:HGNC Symbol;Acc:HGNC:11449]	2	84423523	84460045	-1
ENSG00000062582	0.0298007	5.29162	0.469776	0.64329	0.686327	-8.53056	64951	MRPS24	mitochondrial ribosomal protein S24 [Source:HGNC Symbol;Acc:HGNC:14510]	7	43866558	43869893	-1
ENSG00000204316	-0.020974	5.28571	-0.469668	0.643366	0.686332	-8.52854	64978	MRPL38	mitochondrial ribosomal protein L38 [Source:HGNC Symbol;Acc:HGNC:14033]	17	75898643	75905413	-1
ENSG00000163882	-0.0218687	5.31511	-0.465568	0.646251	0.688867	-8.53578	5437	POLR2H	RNA polymerase II subunit H [Source:HGNC Symbol;Acc:HGNC:9195]	3	184361718	184368596	1
ENSG00000128626	-0.0335125	4.6135	-0.46222	0.648611	0.690607	-8.39159	6183	MRPS12	mitochondrial ribosomal protein S12 [Source:HGNC Symbol;Acc:HGNC:10380]	19	38930548	38933162	1
ENSG00000170515	0.0237471	7.00336	0.454787	0.653864	0.695849	-8.73398	5036	PA2G4	proliferation-associated 2G4 [Source:HGNC Symbol;Acc:HGNC:8550]	12	56104319	56113907	1
ENSG00000111142	-0.0165943	7.42425	-0.446712	0.659593	0.701395	-8.76349	10988	METAP2	methionyl aminopeptidase 2 [Source:HGNC Symbol;Acc:HGNC:16672]	12	95473520	95515839	1
ENSG00000005075	0.0287168	4.58372	0.44477	0.660974	0.702588	-8.39439	5439	POLR2J	RNA polymerase II subunit J [Source:HGNC Symbol;Acc:HGNC:9197]	7	102473118	102478907	-1
ENSG00000085231	-0.0243793	4.69276	-0.440469	0.664036	0.705395	-8.42032	102157402	AK6	adenylate kinase 6 [Source:HGNC Symbol;Acc:HGNC:49151]	5	69350984	69370013	-1
ENSG00000198746	0.0273301	4.08543	0.436212	0.667073	0.708108	-8.27475	63906	GPATCH3	G-patch domain containing 3 [Source:HGNC Symbol;Acc:HGNC:25720]	1	26890488	26900466	-1
ENSG00000112031	-0.0223881	4.22897	-0.426628	0.673932	0.71441	-8.31457	54516	MTRF1L	mitochondrial translational release factor 1 like [Source:HGNC Symbol;Acc:HGNC:21051]	6	152987362	153002685	-1
ENSG00000138399	0.0212784	5.0259	0.422982	0.676549	0.716895	-8.50086	79675	FASTKD1	FAST kinase domains 1 [Source:HGNC Symbol;Acc:HGNC:26150]	2	169529749	169573875	-1
ENSG00000065526	-0.0212301	5.33517	-0.418377	0.679861	0.71992	-8.56099	23013	SPEN	spen family transcriptional repressor [Source:HGNC Symbol;Acc:HGNC:17575]	1	15847864	15940460	1
ENSG00000121274	-0.0237087	4.71136	-0.415637	0.681834	0.721608	-8.43565	64282	PAPD5	poly(A) RNA polymerase D5, non-canonical [Source:HGNC Symbol;Acc:HGNC:30758]	16	50152918	50235310	1
ENSG00000159140	0.0150486	8.03158	0.414776	0.682454	0.722113	-8.8126	6651 102465248	SON	SON DNA binding protein [Source:HGNC Symbol;Acc:HGNC:11183]	21	33542618	33577481	1
ENSG00000112339	0.0175428	6.91299	0.413976	0.683031	0.722594	-8.74635	10767	HBS1L	HBS1 like translational GTPase [Source:HGNC Symbol;Acc:HGNC:4834]	6	134960378	135103056	-1
ENSG00000153048	-0.0178446	6.49149	-0.411228	0.685014	0.724368	-8.71547	23589	CARHSP1	calcium regulated heat stable protein 1 [Source:HGNC Symbol;Acc:HGNC:17150]	16	8852942	8869012	-1
ENSG00000025796	0.0182858	5.63137	0.406629	0.688338	0.727346	-8.61619	11231	SEC63	SEC63 homolog, protein translocation regulator [Source:HGNC Symbol;Acc:HGNC:21082]	6	107867756	107958189	-1
ENSG00000132300	-0.0151397	7.02664	-0.403303	0.690746	0.729667	-8.75814	55037	PTCD3	pentatricopeptide repeat domain 3 [Source:HGNC Symbol;Acc:HGNC:24717]	2	86106182	86142157	1
ENSG00000132478	0.0184265	5.2539	0.392987	0.698235	0.736461	-8.55779	85451	UNK	unkempt family zinc finger [Source:HGNC Symbol;Acc:HGNC:29369]	17	75784771	75825799	1
ENSG00000182134	0.0265545	3.90629	0.391498	0.699319	0.737317	-8.247	11022	TDRKH	tudor and KH domain containing [Source:HGNC Symbol;Acc:HGNC:11713]	1	151770107	151791416	-1
ENSG00000115484	0.0162158	8.5228	0.390852	0.699789	0.737731	-8.84867	10575	CCT4	chaperonin containing TCP1 subunit 4 [Source:HGNC Symbol;Acc:HGNC:1617]	2	61868089	61888804	-1
ENSG00000149743	-0.0315684	3.72173	-0.383758	0.704962	0.742607	-8.1986	83707	TRPT1	tRNA phosphotransferase 1 [Source:HGNC Symbol;Acc:HGNC:20316]	11	64223799	64226254	-1
ENSG00000169612	-0.0354642	2.62049	-0.377849	0.709282	0.746288	-7.89211	83640	FAM103A1	family with sequence similarity 103 member A1 [Source:HGNC Symbol;Acc:HGNC:31022]	15	82986207	82991057	1
ENSG00000119711	0.0254533	5.17748	0.374644	0.71163	0.748509	-8.55083	4329	ALDH6A1	aldehyde dehydrogenase 6 family member A1 [Source:HGNC Symbol;Acc:HGNC:7179]	14	74056850	74084493	-1
ENSG00000247315	-0.0178189	6.43991	-0.374083	0.712041	0.748818	-8.72611	85364	ZCCHC3	zinc finger CCHC-type containing 3 [Source:HGNC Symbol;Acc:HGNC:16230]	20	296968	300321	1
ENSG00000108829	0.0156963	7.48818	0.372506	0.713197	0.749908	-8.79901	55379	LRRC59	leucine rich repeat containing 59 [Source:HGNC Symbol;Acc:HGNC:28817]	17	50375059	50397553	-1
ENSG00000105705	0.0170094	5.2337	0.3709	0.714376	0.750862	-8.56277	57794	SUGP1	SURP and G-patch domain containing 1 [Source:HGNC Symbol;Acc:HGNC:18643]	19	19276018	19320844	-1
ENSG00000143977	-0.0191988	5.24953	-0.370493	0.714674	0.751129	-8.56517	6637	SNRPG	small nuclear ribonucleoprotein polypeptide G [Source:HGNC Symbol;Acc:HGNC:11163]	2	70281362	70293771	-1
ENSG00000079785	-0.0135654	7.71307	-0.369118	0.715684	0.752065	-8.81317	1653	DDX1	DEAD/H-box helicase 1 [Source:HGNC Symbol;Acc:HGNC:2734]	2	15591178	15631111	1
ENSG00000105298	0.020116	5.0049	0.368409	0.716205	0.752487	-8.51895	58509	CACTIN	cactin, spliceosome C complex subunit [Source:HGNC Symbol;Acc:HGNC:29938]	19	3610641	3626815	-1
ENSG00000083845	-0.01341	8.58809	-0.361891	0.721	0.756854	-8.8631	6193	RPS5	ribosomal protein S5 [Source:HGNC Symbol;Acc:HGNC:10426]	19	58386400	58394806	1
ENSG00000123908	-0.0158557	6.63465	-0.359647	0.722653	0.758422	-8.74794	27161	AGO2	argonaute 2, RISC catalytic component [Source:HGNC Symbol;Acc:HGNC:3263]	8	140520156	140635619	-1
ENSG00000099899	0.0181716	4.98993	0.357243	0.724426	0.759946	-8.52005	27037	TRMT2A	tRNA methyltransferase 2 homolog A [Source:HGNC Symbol;Acc:HGNC:24974]	22	20111866	20117392	-1
ENSG00000123136	-0.0161494	6.67118	-0.349256	0.730327	0.765164	-8.75456	10212	DDX39A	DEAD-box helicase 39A [Source:HGNC Symbol;Acc:HGNC:17821]	19	14408819	14419383	-1
ENSG00000240344	0.0216737	3.99882	0.347752	0.73144	0.766203	-8.28811	53938	PPIL3	peptidylprolyl isomerase like 3 [Source:HGNC Symbol;Acc:HGNC:9262]	2	200870907	200889303	-1
ENSG00000168438	-0.016162	5.04755	-0.346324	0.732497	0.767193	-8.53508	51362	CDC40	cell division cycle 40 [Source:HGNC Symbol;Acc:HGNC:17350]	6	110180141	110254275	1
ENSG00000110104	-0.0351215	4.79192	-0.340973	0.736465	0.770616	-8.48266	79080	CCDC86	coiled-coil domain containing 86 [Source:HGNC Symbol;Acc:HGNC:28359]	11	60842071	60851081	1
ENSG00000162639	0.0439474	1.52122	0.334479	0.74129	0.774981	-7.58854	113802	HENMT1	HEN1 methyltransferase homolog 1 [Source:HGNC Symbol;Acc:HGNC:26400]	1	108648290	108661526	-1
ENSG00000074071	-0.0221062	5.78741	-0.333251	0.742203	0.775808	-8.66674	65993	MRPS34	mitochondrial ribosomal protein S34 [Source:HGNC Symbol;Acc:HGNC:16618]	16	1771890	1773155	-1
ENSG00000196305	-0.014553	8.94835	-0.332883	0.742477	0.776052	-8.89047	3376	IARS	isoleucyl-tRNA synthetase [Source:HGNC Symbol;Acc:HGNC:5330]	9	92210207	92293756	-1
ENSG00000007080	0.0244643	4.3339	0.331346	0.743621	0.777033	-8.37947	115098	CCDC124	coiled-coil domain containing 124 [Source:HGNC Symbol;Acc:HGNC:25171]	19	17933016	17943991	1
ENSG00000263465	0.019504	6.30933	0.327785	0.746275	0.779248	-8.73106	10929	SRSF8	serine and arginine rich splicing factor 8 [Source:HGNC Symbol;Acc:HGNC:16988]	11	95067197	95071224	1
ENSG00000196924	0.0146853	10.0396	0.320919	0.7514	0.783866	-8.93729	2316	FLNA	filamin A [Source:HGNC Symbol;Acc:HGNC:3754]	X	154348524	154374638	-1
ENSG00000240682	-0.0139247	4.84375	-0.298341	0.768334	0.799555	-8.50862	57461	ISY1	ISY1 splicing factor homolog [Source:HGNC Symbol;Acc:HGNC:29201]	3	129127415	129161293	-1
ENSG00000118197	0.0135885	4.54888	0.292153	0.772997	0.80351	-8.44427	83479	DDX59	DEAD-box helicase 59 [Source:HGNC Symbol;Acc:HGNC:25360]	1	200623896	200669969	-1
ENSG00000100802	-0.0214583	2.8873	-0.264729	0.793764	0.821557	-8.00675	60686	C14orf93	chromosome 14 open reading frame 93 [Source:HGNC Symbol;Acc:HGNC:20162]	14	22985908	23010166	-1
ENSG00000197114	-0.0138559	4.37897	-0.252481	0.80309	0.830123	-8.41374	84619	ZGPAT	zinc finger CCCH-type and G-patch domain containing [Source:HGNC Symbol;Acc:HGNC:15948]	20	63707465	63736142	1
ENSG00000161265	-0.0356684	1.5949	-0.250839	0.804343	0.831328	-7.63298	199746	U2AF1L4	U2 small nuclear RNA auxiliary factor 1 like 4 [Source:HGNC Symbol;Acc:HGNC:23020]	19	35742464	35745445	-1
ENSG00000113387	-0.00994465	7.30852	-0.240456	0.812276	0.838386	-8.83035	10923	SUB1	SUB1 homolog, transcriptional regulator [Source:HGNC Symbol;Acc:HGNC:19985]	5	32531633	32604079	1
ENSG00000116747	0.00956597	8.24031	0.240289	0.812404	0.838472	-8.88343	6738	TROVE2	TROVE domain family member 2 [Source:HGNC Symbol;Acc:HGNC:11313]	1	193059422	193091777	1
ENSG00000104859	-0.0130962	4.17174	-0.238618	0.813683	0.839473	-8.36527	11129	CLASRP	CLK4 associating serine/arginine rich protein [Source:HGNC Symbol;Acc:HGNC:17731]	19	45039040	45070956	1
ENSG00000182934	0.0111469	6.1705	0.232778	0.818156	0.843308	-8.74428	6734	SRPRA	SRP receptor alpha subunit [Source:HGNC Symbol;Acc:HGNC:11307]	11	126262919	126269144	-1
ENSG00000129317	-0.00938221	6.29363	-0.229443	0.820714	0.845577	-8.75778	83448	PUS7L	pseudouridylate synthase 7 like [Source:HGNC Symbol;Acc:HGNC:25276]	12	43718993	43758817	-1
ENSG00000163714	-0.00947814	7.98271	-0.221699	0.826661	0.85098	-8.87376	23350	U2SURP	U2 snRNP associated SURP domain containing [Source:HGNC Symbol;Acc:HGNC:30855]	3	142964497	143060546	1
ENSG00000129347	-0.0108848	5.31812	-0.219578	0.828291	0.852273	-8.6242	65095	KRI1	KRI1 homolog [Source:HGNC Symbol;Acc:HGNC:25769]	19	10553078	10566037	-1
ENSG00000145331	-0.0146363	3.72184	-0.215186	0.83167	0.855148	-8.25191	93587	TRMT10A	tRNA methyltransferase 10A [Source:HGNC Symbol;Acc:HGNC:28403]	4	99546709	99564032	-1
ENSG00000167978	-0.00899609	7.04685	-0.215012	0.831804	0.855194	-8.82012	23524	SRRM2	serine/arginine repetitive matrix 2 [Source:HGNC Symbol;Acc:HGNC:16639]	16	2752329	2772538	1
ENSG00000185418	-0.0131933	4.12504	-0.208569	0.836767	0.859643	-8.3603	123283	TARSL2	threonyl-tRNA synthetase like 2 [Source:HGNC Symbol;Acc:HGNC:24728]	15	101653598	101724604	-1
ENSG00000054118	0.00733004	8.22396	0.208092	0.837135	0.859835	-8.89008	9967	THRAP3	thyroid hormone receptor associated protein 3 [Source:HGNC Symbol;Acc:HGNC:22964]	1	36224416	36305357	1
ENSG00000204392	0.00777422	5.45212	0.182669	0.856785	0.877454	-8.65575	57819	LSM2	LSM2 homolog, U6 small nuclear RNA and mRNA degradation associated [Source:HGNC Symbol;Acc:HGNC:13940]	6	31797396	31806984	-1
ENSG00000164022	0.00797552	5.50911	0.180987	0.858089	0.878505	-8.66555	9255	AIMP1	aminoacyl tRNA synthetase complex interacting multifunctional protein 1 [Source:HGNC Symbol;Acc:HGNC:10648]	4	106315544	106349226	1
ENSG00000168028	-0.00575771	6.8869	-0.165398	0.870191	0.889071	-8.81945	3921	RPSA	ribosomal protein SA [Source:HGNC Symbol;Acc:HGNC:6502]	3	39406689	39412542	1
ENSG00000167862	0.00946724	4.26146	0.16461	0.870803	0.889553	-8.40419	3396	MRPL58	mitochondrial ribosomal protein L58 [Source:HGNC Symbol;Acc:HGNC:5359]	17	75012670	75021261	1
ENSG00000172733	0.0139915	2.98388	0.159802	0.874543	0.89299	-8.05862	29942	PURG	purine rich element binding protein G [Source:HGNC Symbol;Acc:HGNC:17930]	8	30995802	31033715	-1
ENSG00000170860	0.00941485	5.66838	0.157999	0.875946	0.894085	-8.69477	27258	LSM3	LSM3 homolog, U6 small nuclear RNA and mRNA degradation associated [Source:HGNC Symbol;Acc:HGNC:17874]	3	14178358	14201119	1
ENSG00000011243	-0.00558384	5.88123	-0.152746	0.880036	0.897632	-8.72548	26993	AKAP8L	A-kinase anchoring protein 8 like [Source:HGNC Symbol;Acc:HGNC:29857]	19	15380048	15419141	-1
ENSG00000066044	-0.00620497	7.10352	-0.145582	0.885621	0.902407	-8.83684	1994	ELAVL1	ELAV like RNA binding protein 1 [Source:HGNC Symbol;Acc:HGNC:3312]	19	7958579	8005659	-1
ENSG00000177600	0.00653218	7.92953	0.14078	0.889367	0.905835	-8.8862	6181	RPLP2	ribosomal protein lateral stalk subunit P2 [Source:HGNC Symbol;Acc:HGNC:10377]	11	809647	812880	1
ENSG00000204469	-0.00585068	7.25118	-0.133949	0.8947	0.910485	-8.84771	7916	PRRC2A	proline rich coiled-coil 2A [Source:HGNC Symbol;Acc:HGNC:13918]	6	31620720	31637771	1
ENSG00000266967	0.00738906	4.29192	0.131082	0.896941	0.912276	-8.41705	80755	AARSD1	alanyl-tRNA synthetase domain containing 1 [Source:HGNC Symbol;Acc:HGNC:28417]	17	42950526	42964498	-1
ENSG00000182154	0.00643838	4.41845	0.106628	0.916082	0.928708	-8.45131	64975	MRPL41	mitochondrial ribosomal protein L41 [Source:HGNC Symbol;Acc:HGNC:14492]	9	137551199	137552555	1
ENSG00000225921	-0.00468299	5.74684	-0.100755	0.920687	0.93276	-8.71391	51406	NOL7	nucleolar protein 7 [Source:HGNC Symbol;Acc:HGNC:21040]	6	13615327	13632739	1
ENSG00000105576	-0.00400283	7.01977	-0.098215	0.92268	0.934399	-8.83753	30000	TNPO2	transportin 2 [Source:HGNC Symbol;Acc:HGNC:19998]	19	12699194	12724011	-1
ENSG00000136897	-0.00407014	5.79706	-0.0832877	0.934401	0.944404	-8.7227	54534	MRPL50	mitochondrial ribosomal protein L50 [Source:HGNC Symbol;Acc:HGNC:16654]	9	101387633	101398614	-1
ENSG00000169251	-0.00386248	5.47602	-0.0790595	0.937723	0.947056	-8.67367	51068	NMD3	NMD3 ribosome export adaptor [Source:HGNC Symbol;Acc:HGNC:24250]	3	161104696	161253532	1
ENSG00000110844	0.00394422	4.38594	0.0788317	0.937902	0.94714	-8.44597	25766	PRPF40B	pre-mRNA processing factor 40 homolog B [Source:HGNC Symbol;Acc:HGNC:25031]	12	49568218	49644666	1
ENSG00000122257	0.00314243	6.36087	0.0787624	0.937957	0.94714	-8.78869	5930	RBBP6	RB binding protein 6, ubiquitin ligase [Source:HGNC Symbol;Acc:HGNC:9889]	16	24537693	24572863	1
ENSG00000075856	0.00292832	7.07438	0.0734811	0.942109	0.950726	-8.84331	9733	SART3	squamous cell carcinoma antigen recognized by T-cells 3 [Source:HGNC Symbol;Acc:HGNC:16860]	12	108522580	108561400	-1
ENSG00000013523	-0.00293787	4.94521	-0.0597801	0.952888	0.960225	-8.57505	23357	ANGEL1	angel homolog 1 [Source:HGNC Symbol;Acc:HGNC:19961]	14	76786178	76826246	-1
ENSG00000023191	0.00231325	6.06499	0.0477464	0.962363	0.968634	-8.75941	6050	RNH1	ribonuclease/angiogenin inhibitor 1 [Source:HGNC Symbol;Acc:HGNC:10074]	11	494512	507300	-1
ENSG00000011260	0.00232091	6.02478	0.0456409	0.964022	0.969899	-8.75477	51096	UTP18	UTP18, small subunit processome component [Source:HGNC Symbol;Acc:HGNC:24274]	17	51260528	51297936	1
ENSG00000055332	0.00133496	6.50986	0.0343342	0.97293	0.977101	-8.80477	5610	EIF2AK2	eukaryotic translation initiation factor 2 alpha kinase 2 [Source:HGNC Symbol;Acc:HGNC:9437]	2	37099210	37157065	-1
ENSG00000144895	-0.000438977	6.86006	-0.0108622	0.991434	0.992899	-8.8319	83939	EIF2A	eukaryotic translation initiation factor 2A [Source:HGNC Symbol;Acc:HGNC:3254]	3	150546678	150584242	1
ENSG00000107290	0.000312964	7.83745	0.00730382	0.99424	0.995184	-8.89136	23064	SETX	senataxin [Source:HGNC Symbol;Acc:HGNC:445]	9	132261356	132354985	-1
ENSG00000124608	-0.000357869	5.24986	-0.00685722	0.994593	0.995336	-8.63721	57505	AARS2	alanyl-tRNA synthetase 2, mitochondrial [Source:HGNC Symbol;Acc:HGNC:21022]	6	44299654	44313326	-1
ENSG00000152601	-0.000128291	6.42899	-0.002554	0.997986	0.998249	-8.79831	4154	MBNL1	muscleblind like splicing regulator 1 [Source:HGNC Symbol;Acc:HGNC:6923]	3	152243828	152465780	1
